# Supplementary material for: Characterization of Campylobacter spp. Strains Isolated From Wild Birds in Turkey
Source: PubMed Central journal article supplement (PMC8416542; doi:10.3389/fmicb.2021.712106), 2021-08-18
Supplement: Image_1.pdf [file Image_1.pdf]

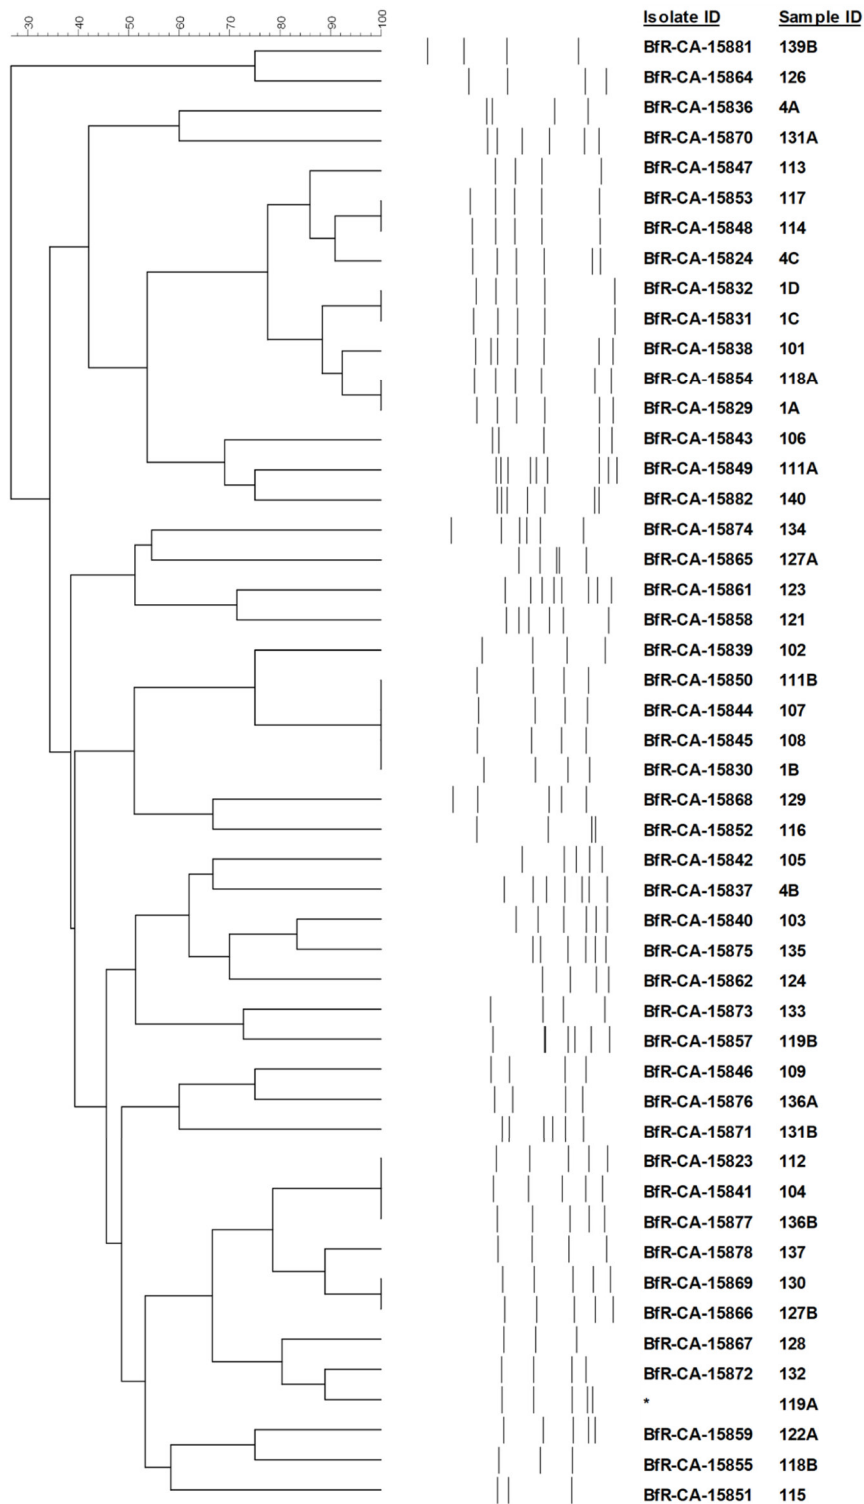

Image 1. Phylogenetic analysis of the *C. coli flaA* gene following HpyF3I digestion.

\* This strain did not survive in the stock, thus there is no given isolate number for it.
