# Supplementary material for: Characterization of Campylobacter spp. Strains Isolated From Wild Birds in Turkey
Source: PubMed Central journal article supplement (PMC8416542; doi:10.3389/fmicb.2021.712106), 2021-08-18
Supplement: Table_5.pdf [file Table_5.pdf]

>>BfR-CA-15822\_min\_cov\_30 putative plasmid location

LOCUS DODKMMJL\_1 12696 bp DNA linear 12-APR-2021  
DEFINITION Campylobacter species strain strain.  
ACCESSION  
VERSION  
KEYWORDS .  
SOURCE Campylobacter species  
ORGANISM Campylobacter species  
Unclassified.  
COMMENT Annotated using prokka 1.14.6 from  
<https://github.com/tseemann/prokka>.  
FEATURES Location/Qualifiers  
source 1..12696  
/organism="Campylobacter species"  
/mol\_type="genomic DNA"  
/strain="strain"  
gene 224..1510  
/gene="trxB\_1"  
/locus\_tag="DODKMMJL\_00001"  
CDS 224..1510  
/gene="trxB\_1"  
/locus\_tag="DODKMMJL\_00001"  
/inference="ab initio prediction:Prodigal:002006"  
/inference="similar to AA sequence:RefSeq:CKG86610.1"  
/codon\_start=1  
/transl\_table=11  
/product="thioredoxin reductase"  
/protein\_id="Prokka:DODKMMJL\_00001"  
/translation="MSETYEIYTPNGLIMDVYKDANKIIFSGNAKPTGNYTEEYSKAL  
FEGDRILRNSPYKDYKPIYLDPNFYTGQASTLLEFKEWQSIYLDPIKGAIAPWTKAE  
KAYYKSLKTKRERYKYLIIRSGIRSTVIDIPYDAYCNVDEKGYLINEEYAYIYDEVNN  
NKETLKSSLFRQEWGIAAGILGKPEYFVRSKNHGFNARMIQCFILYIQLTGGGYEELG  
IKRGIYNYADNLLIEIGMAGIHKNPRLAKLVKDLAKTIQPDEFGMLPFIDEIMGVDW  
VIDLNKYDFAYDEEGRIIWALYNDIEKGLKDPRDVDSTPESRNEFDDAMDGYRNGMK  
TNFDVDIRNERDERSAKLTMDTLVLSAKLAALTPPQGYPNAPYYFTPERLEWIYKRGY  
LDKLLDPRIPAIYRYNFPRELRAKILKFGEENGIKD"  
gene complement(1515..2414)  
/locus\_tag="DODKMMJL\_00002"  
CDS complement(1515..2414)  
/locus\_tag="DODKMMJL\_00002"  
/inference="ab initio prediction:Prodigal:002006"  
/inference="similar to AA sequence:RefSeq:CKG87069.1"  
/note="Uncharacterized conserved protein%2C contains FHA  
domain"  
/codon\_start=1  
/transl\_table=11  
/product="hypothetical protein"  
/protein\_id="Prokka:DODKMMJL\_00002"  
/translation="MIEKEELGIAIENYDECISGSKAFVFDTKGGTIGSGDDCTFRIQ  
DKLEQIKNTHAIVSYEEGSFTIAAFEDSDIYYNKSF SRMPSGYEIISIGDIFKIGNL  
EFRFVDAKSIEESIKENKKYLEDIEKRNFDEIEIEIPRGKTSINFDKNEELKEILKNN  
NYKFIEEEKADDSFLKEIIQRDPNSLGYENILKSLVKNLKDIKTKQSSKLNNNYSPI  
NIKDFESIINNIPLIKSTRILINILALSILIAKELYTPIFEEMEENMFIKYLEAAIQNNI

gene KEDKILFENLTLKALEKYIKDFE"  
 complement(2411..5938)  
 /locus\_tag="DODKMMJL\_00003"  
 CDS complement(2411..5938)  
 /locus\_tag="DODKMMJL\_00003"  
 /inference="ab initio prediction:Prodigal:002006"  
 /inference="similar to AA sequence:RefSeq:CKG87105.1"  
 /note="Uncharacterized protein conserved in bacteria"  
 /codon\_start=1  
 /transl\_table=11  
 /product="hypothetical protein"  
 /protein\_id="Prokka:DODKMMJL\_00003"  
 /translation="MFKKIFDFIKSRLFITAFLLCCIFLFSVLFWFWSPLIAFNDIYI  
 FSSSFLRFSIILIIWLIVFLFLLKPIINFISSLKSEKRLKFKDLKKEADEFIYKSKR  
 NFFLSLKDAKETWKNDLKTKNLPLIIIIIGNEGAGKSTFINYSDIEYPLSDSLESYKFF  
 HKSTRNFALYVSKKGALLDTEGNYFSQEEFFKPASSDEIPEDDIDKNRDFLIKKNIWK  
 KFLTFLNKNFFHSKLNGIILVDTVLF LNPKKEYSKNLIRYLTKRVNECEKTLNLKLP  
 IYIVFSKLDLMEGMKEYFDIFDKKISDKILGLSFDKILSEEF LNNEFKELSNSLLCSL  
 MSKNSHIYNIENKNKSYFLKQLDNLFALAKTFILEVQEENKLNNSYLRGVYFVSAY  
 QENIPRNFLLDAICEKYNCKKVLKSSIIYNKQSYFVKSLLEDLIFTDYALNTMKSYS  
 KKLSFLIIILIIIGFGTYTISSYFISKNDKEFEKSQNTLRALQSLEDQDYQNLNIKQK  
 ADFLIELRNILNTYPELWQDDNIFQYLNLNLSYKGFKEAKQLYKLNEDVLTNTLLKE  
 MEYTLTDTNKENLIKTLYLRSLEQKYFNKEMLKIWINENWNTLSKYLISKDDFLG  
 GVDELKQFNLKSFTEDENSINIGKRKLESISRTQRIYTLLNFLNSDKPKKEYLIKEDL  
 GFAANSVFSNNSQITSIDKIYTKVGMDFLNDLNQQVDTAINIESWMLDNNFKENKNT  
 LTMGILKLYLSEYQNAWQNLLASLQPVRYNTKEAMLNELNLSKKNPLYSLKIVSS  
 NTNLDVLLTQAYNLGLNAGEIRSNFIGVSNAFTQYHKLVNKNTLLSVGNIEVGKGT  
 DDEKILDILNTSITNMSNKIIDFSSNNQSAEEKISYALGGNKDANDPFAVFQMSIKK  
 LPSDLERYYNQLSDHSWNFIENHGISLFNTAWINEVYNPFINDIAPFYFNEESTANL  
 SMDSFKTFFGRNGVLNSFYKYLNNVLVKRKNYSINSQFASKLNFSKEFLDFITNAG  
 NLSSLILNANDNIRVNFTIQSLDLSADFSVVKLGYNNKIIQYDHTLDQTLQIVAEFNF  
 NGTSLNFTAYNYSNPNLNYTKSYKGEWAWYKFIKDNKNNSTYSIMFNNKNLYDFFEI  
 INGASDLNNIVYILNNLKIVENITGVNKQ"  
 gene 6073..6588  
 /locus\_tag="DODKMMJL\_00004"  
 CDS 6073..6588  
 /locus\_tag="DODKMMJL\_00004"  
 /inference="ab initio prediction:Prodigal:002006"  
 /inference="similar to AA sequence:RefSeq:AJK71137.1"  
 /codon\_start=1  
 /transl\_table=11  
 /product="major exported protein"  
 /protein\_id="Prokka:DODKMMJL\_00004"  
 /translation="MAEPAFIRIEGSTQGLISSGASTEASIGNRYKSGHEDEIMAQEV  
 SHIVTVPVDQQSGQPSGQRVHKPFSFTCSLNKSVPLLYNALTKGERLPTVEVHWFRTA  
 TSGGSEHFFTTKLEDAIITNIELIMPNAQESSNHDKTELLKVSMSYRKVVWEHTAAGT  
 SGSDDWREGKA"  
 gene 6846..7406  
 /locus\_tag="DODKMMJL\_00005"  
 CDS 6846..7406  
 /locus\_tag="DODKMMJL\_00005"  
 /inference="ab initio prediction:Prodigal:002006"  
 /codon\_start=1  
 /transl\_table=11

```

/product="hypothetical protein"
/protein_id="Prokka:DODKMMJL_00005"
/translation="MTYILLIIISTILSYLILKFIYKIIIFKSTKSVSKFLVFLGSIG
LIIFYYPYSYYLEPSYWQFRNMCKLNELPNNEEKYNKILGYFDKKLGDIDDFRHLKK
YGRIEMWLCIYDDTYKTPSNFQEKIEMDNIALKTKNMQMSLHKIVDMHISPYWNTRR
YILEGNEGMNFEFIEDELACGNLYQ"
gene 7425..7646
/locus_tag="DODKMMJL_00006"
CDS 7425..7646
/locus_tag="DODKMMJL_00006"
/inference="ab initio prediction:Prodigal:002006"
/inference="similar to AA sequence:RefSeq:CKG86895.1"
/codon_start=1
/transl_table=11
/product="methyltransferase small"
/protein_id="Prokka:DODKMMJL_00006"
/translation="MTNKEQINNLKDYTDSYFNFVYTEGQKALGFKISKTRFFKDKSE
LEKLDYFKALHDEYNGYLVIDDSLFFMRN"
gene 8407..8601
/locus_tag="DODKMMJL_00007"
CDS 8407..8601
/locus_tag="DODKMMJL_00007"
/inference="ab initio prediction:Prodigal:002006"
/codon_start=1
/transl_table=11
/product="hypothetical protein"
/protein_id="Prokka:DODKMMJL_00007"
/translation="MSKNIKTQEAKLDLITKFFDYANIADASYAMLDLIDENDENSTL
APLWLYADGVTNLKNHSCRQ"
gene 8605..9171
/locus_tag="DODKMMJL_00008"
CDS 8605..9171
/locus_tag="DODKMMJL_00008"
/inference="ab initio prediction:Prodigal:002006"
/codon_start=1
/transl_table=11
/product="hypothetical protein"
/protein_id="Prokka:DODKMMJL_00008"
/translation="MKYIILTFILGLIVFVSVKGCIFYPTSYRAFIPKSLDSEYKEFER
LCKEEVGKVYARPIKHGIKLEDFNLPSTSARRVALSRHTYMLIENVTTREDEIFYL
HIAGFEYTGWTRKSFMSHDDSKKYIRCEPLLYGKTWKENAKIMEQKAFDNKEYIGTE
EYLQYSPYHYEYNTLYRQIVNFKQKKN"
gene 9171..9350
/locus_tag="DODKMMJL_00009"
CDS 9171..9350
/locus_tag="DODKMMJL_00009"
/inference="ab initio prediction:Prodigal:002006"
/codon_start=1
/transl_table=11
/product="hypothetical protein"
/protein_id="Prokka:DODKMMJL_00009"
/translation="MIYNYKYSLGIYVNDWGFMMGSEGNPHVFLGLTKGKSPDELDKI
DEELRREYLKNKNSN"
gene 9410..9901

```

CDS                    /locus\_tag="DODKMMJL\_00010"  
                       9410..9901  
                       /locus\_tag="DODKMMJL\_00010"  
                       /inference="ab initio prediction:Prodigal:002006"  
                       /inference="similar to AA sequence:RefSeq:CKG86435.1"  
                       /codon\_start=1  
                       /transl\_table=11  
                       /product="hypothetical protein"  
                       /protein\_id="Prokka:DODKMMJL\_00010"  
                       /translation="MQIPIYSKLTLESRGIDNITSGQIAWFVCSVIFTYLLFLLIV  
                       IINTRTISFENLKFFTFEGFFKSLAFIFANHFFLFIFMWIVCIINFFNIKNLIPITLN  
                       WIISYCYFVLEINIYFILILCITICVVFYFLQKRLLYTFLFYFVYVMVLTYTFLYLG  
                       GGK  
                       FYK"

gene                   9898..10035  
 CDS                    /locus\_tag="DODKMMJL\_00011"  
                       9898..10035  
                       /locus\_tag="DODKMMJL\_00011"  
                       /inference="ab initio prediction:Prodigal:002006"  
                       /inference="similar to AA sequence:RefSeq:CKG86410.1"  
                       /codon\_start=1  
                       /transl\_table=11  
                       /product="hypothetical protein"  
                       /protein\_id="Prokka:DODKMMJL\_00011"  
                       /translation="MKYYVTIYIDPLDFEDATHAFLGLTKGKSPDELDKIDKELRQ  
                       K  
                       F"

gene                   10082..10507  
 CDS                    /locus\_tag="DODKMMJL\_00012"  
                       10082..10507  
                       /locus\_tag="DODKMMJL\_00012"  
                       /inference="ab initio prediction:Prodigal:002006"  
                       /inference="similar to AA sequence:RefSeq:CKG86435.1"  
                       /codon\_start=1  
                       /transl\_table=11  
                       /product="hypothetical protein"  
                       /protein\_id="Prokka:DODKMMJL\_00012"  
                       /translation="MQIPIYSKLTAKLESKIDNISSGQIAWFVCSVGFIIIPMMYLY  
                       ISNNYNQFIILFFMIFIFILNMLYTKNFFALLLLVILIFIYMKYHEFIYNFKILFFIF  
                       APIILIFLAWRILITFLCGYIFLVAMVYIFELLGGFYK"

gene                   10504..10698  
 CDS                    /locus\_tag="DODKMMJL\_00013"  
                       10504..10698  
                       /locus\_tag="DODKMMJL\_00013"  
                       /inference="ab initio prediction:Prodigal:002006"  
                       /inference="similar to AA sequence:RefSeq:CKG86410.1"  
                       /codon\_start=1  
                       /transl\_table=11  
                       /product="hypothetical protein"  
                       /protein\_id="Prokka:DODKMMJL\_00013"  
                       /translation="MKYYATIYIDPLVECFDFKNCYQWQREDFTHAFLGLTKDKSPD  
                       ELDKIDEELRREYLKKNKNSN"

gene                   10758..11183  
 CDS                    /locus\_tag="DODKMMJL\_00014"  
                       10758..11183  
                       /locus\_tag="DODKMMJL\_00014"

```

/inference="ab initio prediction:Prodigal:002006"
/inference="similar to AA sequence:RefSeq:CKG86435.1"
/codon_start=1
/transl_table=11
/product="hypothetical protein"
/protein_id="Prokka:DODKMMJL_00014"
/translation="MQIPIYSKLTCKLESKIDNISSGQIAWFVCSVGIFIIPIYFY
ISNNYDQFTILFIMIFIFILNMFYTKNFFALLLLVILIFIYMKYHEFIYNFKILFFIF
APIILIFLAWRILITFLCGYIFLVAMVYIFELLGGFYK"
gene 11180..12457
/locus_tag="DODKMMJL_00015"
CDS 11180..12457
/locus_tag="DODKMMJL_00015"
/inference="ab initio prediction:Prodigal:002006"
/inference="similar to AA sequence:RefSeq:CKG86410.1"
/codon_start=1
/transl_table=11
/product="hypothetical protein"
/protein_id="Prokka:DODKMMJL_00015"
/translation="MKYYATIYIDPLVECFLDFKNQCYWQREDFTHAFLGLTKDKSPD
ELDKIDKELRQEYLKNKEWDKIDQKWYEAKEPNEFNDGFWGFGTGIANVAESLIGSPG
KVFNNNQYVLDNNVDKNRYIIKLRSPQTFKPSNRCTLEISEEQYETLLANIKADFEA
TKEITPNSEKPINEEFTYKLENNCVTWVVKLSSIGIEVNPVVKDPSGLLMATKLI
QSIHSIFLKFQNIIDNLQSVKGAKAFKNWARMLINNSLMQEIYLDYKQYNSENLSP
EQEEVLYALWNITRVYKILGILLSRLITKSGTKNLKGTFFELIYFDKNDKQAKLLKASN
HYEAIIIQELDLSKKYNNFSASKFYPIFIPKDEMLSRITLYHKYDYGNISQEYQKDRN
EFYFNVLAGEKSDKYWSSSYHKMTKSLRKVYVS"

```

ORIGIN

```

1 agactagaaa ttatttataa aagacataag cttgataaac tccttgatcc aagaatccct
61 gctatttata gatataatcc cccaagagaa cttagagcta agataactcaa atttgctgaa
121 gaaaatgaca ttaaagatta aagtaatttc ataggtagac tggccactac tataatcata
181 gaagatgggt tatacatggg ataaatttaa gaaaggataa ataatgagcg aaacttatga
241 gatttataca cccaatgggt taataatgga tgtatataaa gatgctaata aaatcatttt
301 ttcaggaaat gctaaaccaa caggcaatta taccgaagaa tattccaaag ctctcttcga
361 aggtgaccgc atattaagaa actcccccta caaagactat aaaccaatat atctagatcc
421 taacttttat acagggcaag cttctacttt acttgaattt aaagaatggc aaagcatata
481 tttaaaagat cccattaaag gagctatagc tccttggact aaagcagaaa aagcttatta
541 taaatcttta aaaacaaaa gagaaagata taaatattta attataagaa gcggtataag
601 aagtaccggt atagatatac cctatgatgc ttattgtaat gtagatgaaa aaggatattt
661 aatcaatgaa gaatacgcct atatttatga tgaagttaac aataataaag aaaccctaaa
721 atcttctctt ttagacaag aatggggtat agcagcagga atactaggaa aacctgaata
781 ttttgtgcgt tctaaaaatc atggccttaa tgctagaatg atacaatggt ttattttata
841 tattcaactc acaggtggag gatatgaaga attaggtata aaaagaggaa tttataatta
901 tgctgataat cttttagaaa taggtatagg tatggcaggg atacataaaa atcctttaag
961 ggctaaattg gtaaaagatt tagctaaaac tatacagcct gatgaatttg gtagctacc
1021 ttttatagat gagattatgg gagtagattg ggtgattgat ttaaataaat atgattttgc
1081 ctatgatgaa gaaggtagaa tcatttgggc tttatataat gatattgaaa aaggcaaatt
1141 aaaagatcca agagatgtgg attctactcc tgaagtaga aatgaatttg atgatgctat
1201 ggatggatat agaaatggga tgaaaactaa ttttgatgta gatattagaa acgaaagaga
1261 tgagagatct gctaaactga ctatggatac cctagtatta agtgccaaac tcgcagccct
1321 cactcctcct caaggctatc ctaatgcccc ttattatttt acacctgaaa gattggaatg
1381 gatttataaa agaggatatt tagataaact cttgatcca agaactcctg ctatttatag
1441 atataatccc ccaagggaac ttagagctaa gatactaaaa tttggcgaag aaaatggcat
1501 taaagattaa aaaatcactc aaaatcttta atatactttt ccaatgcttt tagggtaaga

```

1561 ttctcaaaaa gaatcttatc ttctttgata ttgttttgta tggcagcttc aagatattta  
1621 ataaacatat tttcttccat ttcttcaaag atgggagtgt ataattcttt tgcgattagg  
1681 ctaagggcta aatatattaat caatcttgtg gatttgatta aaggatattt attaataata  
1741 ctttcaaaat ctttaatggt gataggagaa taattattat ttaatttaga gctttgttgt  
1801 tttgttttaa tatcttttaa attttttacc aaacttttta gaatattttc atacccaat  
1861 gaatttggat ctctttgaat gatttctttt aaaaagctat catctgcctt ttcttcctcg  
1921 ataaacttat aattattatt ttttaaaatc tctttcaact cttcgttttt gtcaaaattt  
1981 atacttgttt ttcctctagg ttcaatttca atttcatcaa aatgattgcg tttttcaata  
2041 tcttctaagt attttttatt ttctttgata ctttcttcaa tgctttttgc atccacaaat  
2101 ctaaattcta aattaccgat tttaaaaata tcgcctatgc tgattattat ttcatagcca  
2161 cttggcattc tagaaaagga cttgttataa taaatgctag aatcttcaaa agctgcaatt  
2221 gtaaaagatc cttcttcata agatactatg gcatgggtat ttttgatttg ctctagttta  
2281 tcttgaatac gaaaagtgca atcatcacca cttcctatgg ttcctccctt tgtatcaaat  
2341 acaaatgctt tagaaccact aatgcattcg tcataattct caatagcaat tcctaattct  
2401 tctttttcta tcattgttta tttactcctg tgatattttc tactatttta agattattta  
2461 aatataaac tatattattht aatcactag caccgttaat aatttcaaag tcaaaatata  
2521 agtttttatt attattaaac ataatgctgt atgtagaatt gtttttatta tcttttataa  
2581 acttatacca tgcccattct cccttatatg attttgata atttaaatta ggattggagt  
2641 agttgtaggc tgtaaaattt aaacttgttc cattattgaa ttcttctgct acaatttgta  
2701 gggtttgatc aagagtatga tcgtattgaa taattttatt gttgtagcca agctttacaa  
2761 aggaaaaatc tgcacttaaa tcaaggcttt gaatagtaaa attaactctt atattatcat  
2821 tagcattcag tatgaggcctt gagagattac ctgcattggt gataaaatct aaaaattctt  
2881 tagagaaatt taattttgaa gcaaattgag aattgataga atagttattt tttcttttta  
2941 ctaaaacatt gttcaagtat tttttataaa aactattttaa tactccattt ctaccaaaaa  
3001 atgtttttaa gctatccata ctaagattag ctgtgctttc ttcattaaaa ggataaaatg  
3061 gcgcaatatac attgataaat ggattataca cttcattaat ccaagcagta ttaaataaag  
3121 aataccatg attttctata aaattccaag aatgatcaga aagctgatta taataccttt  
3181 ctaaactact aggtaatttt tttatactca tttgaaatac agcaaaaagga tcattggcat  
3241 ctttattgcc accaagagca tatgaaattt tttcttcagc gctttgggta ttattggagc  
3301 taaagtctat aattttattg gacatatttg taatacttgt attaagaata tctaatttt  
3361 tttcatcatc agtgcctttg cccacttcta tattaccaac actcaaaagt gtatttttgt  
3421 ttactagctt atgatattgc gtaaaagcat tgcttaccct aataaaattt gatctaattt  
3481 cccctgcatt taatcctaaa ttgtaggctt gagttagtaa aactgcatca tttaaatttg  
3541 tattagaact aacaattttt aacaagaat ataaagggtt ttcttttttt gataagatat  
3601 taagctcatt aagcattgcc tctttgggtat tatacctaac aggttgcaat gaagcgagta  
3661 gattttgcca agcattttgg tattcactta agtataattt taaaatacc atagtcaaag  
3721 tgtttttatt ttttttaaaa ttgttatcta gcatccaaga ttcaatattg attgcggtgt  
3781 caacttgttg atttaaatca tttaaaaagt ccatcatacc gacttttgta tatattttat  
3841 ctatagaagt tatttgagaa ttatttgaaa atacactatt tgcagcaaaa cctaaatcct  
3901 cttttataag atatttttct ttaggtttat cgctattttaa aaaattaaga agagtgtaaa  
3961 ttctttgagt tctacttata ctctcaagtt ttctttttcc tatattttata ctgttttcat  
4021 cttctgtaaa ggatttaaga ttaaattggt taagttcatc cacacctcct agaaagtcatt  
4081 ctttagagat taaatactta cttagagtat tccaattctc gttaatccaa attttttagca  
4141 tttcttttatt aaaatatttt tgctcaaca aagatctata taaatataag gttttgatta  
4201 aattttcttt atttgtgtca gtaagtaaag tatactccat ttcttttaat aaagtatttt  
4261 ttaacacatc ttcatttagt ttataataaa gttgttttagc ttcttttaaaa cttttgtatg  
4321 agagattaag gtttaaatat tgaaatata tatcatcttg ccaaagttca ggataagtat  
4381 ttaaaatatt tctcaattca attaaaaagt cggctttttg tttgatattt aaattttgat  
4441 aatcttgatc ttcaagaagc gattgtaaag ctcttaaagt gttttggctt ttttcaaatt  
4501 ctttatcggt tttacttata aaataagaag atatagtata tgttccaaag cctatgatta  
4561 aaattatgat taaaaagat aattttttgg aataagattt catagtattt aaagcataat  
4621 ctgtaaaaaat taaatcttca agtagtgatt taacaaaata actttgttta ttatatataa  
4681 tactagattt tgataatact tttttacagt tgtatttttc acatattggca tcgagcaaga  
4741 aatttctagg aatattttct tgataagcac taacaaagta aactcctcta agataagaat

4801 tatttttaag cttgttttct tcttgcactt caaaataaa tgtttttgcc aatgcaaata  
4861 aattatcaag ttgttttaaa aataagtagc ttttattttt attttctata ttgtaaatat  
4921 gggaatTTTT actcattaag gagcataata atgaattact taattcttta aattcattat  
4981 ttaaaaattc ttcacttaag attttatcaa aagataatcc taaaatttta tccgaaatTT  
5041 ttttatcgaa aatatcaaaa tactctttca tgccttccat caagtcaagt tttgaaaaaa  
5101 ctatatagat aggcagcttt aaattcaaag ttttttcgca ttcgtttact ctttttgTTA  
5161 gatatactaat aagatttttg gaatactcct taggattatt taagaaaagg acagtatcaa  
5221 caactaaaat aattccattt agtttgctat gaaaaaatt tttattgagg aaagtaagga  
5281 atttttcca tatatttttt ttaattaaaaaatctctatt tttatctata tcatcttcgg  
5341 gtatttcgtc gctacttgca ggtttaaaaa atcttcttg tgagaagtag tttccttctg  
5401 tatctaacia agcacctttt tttgatacat aaagcgcaaa atttctagta gacttatgga  
5461 attttttata agactctaaa ctatcgctaa gtggatattc gatgtcagaa taattaataa  
5521 aagtgccttt tccagcccct tcatttccta tgataataat taagggtaaa ttttttgTTT  
5581 ttaaatcatt cttccatggt tctttggcat ctttaagaga taaaagaag tttcttttag  
5641 atttgtagat aaactcatca gcttcttttt ttaggtcttt aaattttaat cttttttcac  
5701 tttttaaaga agatataaaa tttataatag gctttaataa aaaaaataaa aaaacaataa  
5761 gccaaattat caagataata ctaaacttta aaaatgagct actaaaaata tatatgtcgt  
5821 taaaagctat taaaggactc caaaaccaa ataaaacact aaaaagaaaa atacaacaaa  
5881 gtaaaaaagc agttataaat aatcttgatt ttataaaatc aaatattttt ttaaacatcg  
5941 ttattcctta tttaaaagta aaaacaaata aatattaata tcaatataca aatattttac  
6001 aaaaatttat atagattaag attaaaatga tacaattttg aatgttaaaa aaaattaaag  
6061 gaggttcttt ttatggctga accagcgttt ataagaattg aaggttccac acaaggtttg  
6121 atttcaagtg gtgcatctac tgaagcgagt attggcaata gatataaatc aggtcatgaa  
6181 gatgaaatca tggcgcaaga ggtatctcat atcgtaactg taccgttga tcagcaaagt  
6241 gggcaacctt ctggacaaag agttcataag cccttttctt ttacttgctc attgaataag  
6301 tccgtgcctt tgttatataa tgcacttacc aaaggagaaa gacttccaac agtcgaagtt  
6361 cattggTTTA gaactgcaac aagtggcgga tctgaacatt tttttactac aaaattggaa  
6421 gatgcaatta ttacaaatat tgaattaata atgccaaatg cacaagagtc aagtaatcat  
6481 gataaaaccg agcttttaaa agtttcaatg agttatagaa aagtagtttg ggaacatact  
6541 gctgctggaa cttagcgaag cgatgattgg agagaaggta aagcttaatt ataattatct  
6601 taaaaaaccc cgactaaaat gcgtaatttt atagtcgggg ttatatctta aaaatatatt  
6661 ttgttttctt ggttttaatt acaaaactac tttctaaatt atagtactat ttattcatac  
6721 atgaaatcat ttatcttaat gagcaatttt cgtcttctat gtttgatac tagcgagTTA  
6781 atctttatca aaccacaaaa ttacatctta attttaataa aatagagagt ctaaggagat  
6841 aacgtatgac atacatatta cttcttatta taatttctac tattctttct tatcttatat  
6901 taaaatttat ttataaaatc atctttaaat ctacaaaaag cgtttcaaag tttttagtct  
6961 ttcttggaag tataggctta attatctttt attatactcc ttattcttat tatttagagc  
7021 ctagtatttg gcaatttagg aatatgtgta agttaaatga acttcctaatt aacgaagaga  
7081 aatataataa gattctaggg tattttgata aaaagttagg tgacatagat gattttcgac  
7141 atctaaaaaa atatggtagg atagaaatgt ggctttgtat atattacgat gatacttaca  
7201 aaactcctt aaattttcaa gaaaagatag agatggataa tattgcacta aaaacaaaaa  
7261 atatgcaaat gtctttacac aagattgTTG atatgcatat aagtcatat tggaaacta  
7321 gaaggatat attagaaggc aatgagggtta atatgaattt tgagtttata gaggatgagc  
7381 ttgcttgTGG caatctttat caataataat ataaggaata aataatgacc aataaggaac  
7441 aatcaacia tttaaaagat tatacagata gttattttta ttttgTTT actgaaggac  
7501 aaaaagcttt aggatttaaa atatctaaaa ctagattttt taaagataag agtgaattag  
7561 aaaaattgga ctattttaaa gcattacatg atgaaataa tggatatttg gttatagatg  
7621 attctttatt ttttatgcga aactaaatgg agatttagag aattacaagc tagaaatTTT  
7681 tctcaaagat atgagattaa atttcatcag tccaacacta caagtggctt tagcactgct  
7741 ttgtcttata aaaagacaga gaaaattaag aggaattaat aaatactaga attctctatt  
7801 aatcttttaa tatttattct tatatttttt tttttgTTT ttatattttc tattatttta  
7861 tattttatct ttaaaatTTT ttttaaaata aaaaataaaa taaaactat aaattttaaa  
7921 aaaatattta aaaaacttac tttatttctt ttgcctgtat atcttttatt attcttaaca  
7981 ggaggttgTT cttataaata tatggatccg cgatattatg agtttgagag cttgtgtaca

8041 gatatagata ataaagtaat aatgtacgat aaagcttatt gggaaatatt tagcaataga  
8101 gaaaaaggag aattctttat ttaatcaaaa aataaataaa aaatatattt tgatttttaa  
8161 aatcaaaaa aacattaatg tattacaaaa aataaattta ttttaaaaga agttacattt  
8221 gaagattatt atgataatat tcattattca acgcatttat cctatatatta tgataattat  
8281 ggtacattct taaaagggtga tgagggcgct ggattacatt ttagatataat ggaagtatta  
8341 agttgtaaga atattgataa aaaatttaag aaagatgatt ggcaagttga aactttggaa  
8401 taacaaatga gcaaaaacat taaaacacaa gaagctaaat tagacttaat cactaaattt  
8461 tttgactatg ctaatatagc agatgcaagt tatgcaatgc ttgatttaat cgatgagaat  
8521 gatgagaatt caacccttgc acctttatgg ctttatgcag atggggtaac taatctaaaa  
8581 aatcatagta aaaggcaata aagtatgaaa tatattatat tgacttttat tctaggtttg  
8641 attgtatttg tttcagtaaa aggttgtttt tatcctacaa gttatcgtgc ttttatacca  
8701 aaaagcttag attccgagta taaagagttt gaaagattat gtaaagagga agtaggaaag  
8761 gtagtatatg caagacctat aaaacatggg ataaagttgg aagatttggt taacttgcct  
8821 tctacgagtg ctagacgtgt tgctttaagc agacatacat atatgttgat agaaaatggt  
8881 acaacaagag aagacgaaat tttttactta catatagctg gttttgaata ttatacaggc  
8941 tggacaagaa aaagtttttc tatgcatgat gattctaaaa aatatataag atgtgagcct  
9001 ttgctttatg gtaaaacttg gaaagaaaat gctaagataa tggaaacaaa ggcatttgat  
9061 aataaagaat atataggcac agaagaatat ttacaatatt caccttatca ttatgagtat  
9121 aatacacttt atcgccaat agttaatttc aaacaaaaga aagagaatta atgatataa  
9181 attacaata ctctcttggg atctatgtta atgattgggg ctttatgatg ggcagtgagg  
9241 gaaaccctca tgtgttctta ggacttacca agggcaaaag tcctgatgag ttagataaaa  
9301 tagatgaaga attaagacga gaatatctta aaaacaaaaa ttcaaattaa taaaaaattt  
9361 taagcaaatt agtttataat aaaacaattt atctgtatta ggagtaaatt tgcaaatccc  
9421 tattttattct aaattaaaaa caaagctaga aagtagagga atagacaata taacaagcgg  
9481 acaaattgct tggtttgtgt gtagtgtaat ttttacctat ttattatttt tattaattgt  
9541 aattataaat actagaacaa tatcttttga aaaccttaaa ttttttactt ttgaaggttt  
9601 tttcaaatct cttgctttta tttttgcaa tcatTTTTTT ttatttattt ttatgtggat  
9661 tgtttgata ataaatTTTT ttaatataaa aaatTTAatt ccaataacac taaattggat  
9721 aataagctat tgttattttg ttcttgaat taatatttat tttattttga ttttatgtat  
9781 aaccatttgt gttgtatttt attttttaca aaaaagatta ttatatactt tttattttta  
9841 ttttgtttat atggatttaa cttatacttt gttttatctt ggtggaggat tttataaatg  
9901 aatattatg ttacgattta tattgatccg ctatttgatt ttgaagatgc taccacgcc  
9961 ttttaggac ttaccaagg caaaagtcct gatgagttag ataaaataga taaagaatta  
10021 agacaaaaat ttaagcaaa ttagtttata ataaaacaat ttatctatat taggagtaaa  
10081 tttgcaaat cctatttatt ctaaactcaa agcaaagcta gaaagtaaag gaatagacaa  
10141 tatatcaagt gggcaaatg cttggtttgt gtgtagcgtg ggtattttta tcattcctat  
10201 gatgtatctt tatattagca acaattacaa tcaatttatt attttgttt ttatgatatt  
10261 tatttttata ttaaataatgc tttatactaa aaatTTTTTT gcattattat tgcttgaat  
10321 attaataatt atatatatga aatatcatga gtttatctat aattttaaaa tttattttt  
10381 tatttttgca cctataattc ttatctttt aagggcttgg agaattttaa taacttttt  
10441 atgcggatat atttttttag tggctatggg atatatattt gagttattag gaggatttta  
10501 taaatgaaat attatgcaac aatttatatt gatccattgg tagaatgttt tttggatttt  
10561 aaaaatcagt gttattggca aagagaagat ttcaccacg ctttcttagg gcttactaaa  
10621 gataaaagtc ctgatgagtt agataaaata gatgaagaat taagacgaga atatcttaaa  
10681 aacaaaaatt caaattaata aaaaatttta agtaaattag tttataataa aacaatttat  
10741 ctgtattagg agtaaatttg caaatcccta tttattctaa attaaaaaca aagctagaaa  
10801 gtaaaggaat agacaatata tcaagcggac aaattgcttg gtttgtgtgt agttaggta  
10861 tttttatcat tcctatgata ttttttata tcagcaacaa ttatgatcaa ttcactattt  
10921 tatttattat gatatttatt tttatattaa atatgtttta tactaaaaat tttttgcat  
10981 tattattact tgtaatatta atatttatat atatgaaata tcatgagttt atctataatt  
11041 ttaaaatttt attttttatt tttgcacct taattcttat ctttttaagg gcttggagaa  
11101 ttttaataac ttttttatgc ggatatattt ttttagtggc tatggtatat atatttgagt  
11161 tattaggagg attttataaa tgaaatatta tgcaacaatt tatattgatc cattggtaga  
11221 atgttttttg gatttttaaa atcagtgtta ttggcaaaaga gaagatttca cccacgcttt



```

11281 cttagggcct actaaagata aaagtcctga tgagttagat aagatagata aagaattaag
11341 acaagaatat cttaaaaaca aagaatggga caagatagat caaaaatggt atgaagctaa
11401 agagcctaag gagtttaatg atggtttttg gggttttgga actggaattg ctaatgttgc
11461 agaatctctt ataggatctc ctggcaagt atttaataat aaccaatatg tattagataa
11521 caatgttgat aaaaatcgct atattattaa aaaactaaga agcctcaaa cttttaaacc
11581 ctctaactgt tgcactttag aaatttctga agaacaatat gaaaccctac ttgcaaatat
11641 taaagctgat tttgaagcca caaaagaaat cacacctaag agcgaaaagc caatcaatga
11701 agaatttacc tataaacttc ttgaaaataa ttgctgttact tgggttggtta aaaagctttc
11761 tagcatagga atagaagtgg taaatcccgt tgtaaagat cctagcggat tattaatggc
11821 tacaaaatta atacaaagca ttcattctat ctttttaaaa tttcaaaaca ttgatgataa
11881 tttacaaagc gtaaaagggt caaaagcttt taaaaattgg gctagaatgc ttataaataa
11941 ttcattaatg caagaaatgt atcttgatga atataaaaa caatacaata gtgaaaatct
12001 tagtccagaa caagaagaag ttttatatgc tttatggaat attacaaggg tttataaaat
12061 ttttaggcatt cttttaagtc gttaattac aaaatcgggc actaaaaacc taaaaggcac
12121 ttttgaatta atttattttg ataaaaatga taagcaagca aagcttttaa aagcgagtaa
12181 tcattatgag gcgattatta tacaagaact agatttaagt aaaaaataca ataattttag
12241 tgcgagtaaa ttttatcctt ttatctttat acctaaagat gaaatgctct caagaacgct
12301 ttatcataag tatgattatg gtaatatctc acaagaatat caaaaagata gaaatgaatt
12361 ttattttaat gttttagcag gagaaaaaag cgataaatat tggagttcta gttatcataa
12421 aatgactaaa agtttaagga aagtctatgt ctcttgaaaa aatcaaagaa acgatttttg
12481 cttatgataa agaagtgatt gattgtgaag ttttaagggc taaaaatatt gatgtaattc
12541 attctaaaat ttattttcaa ggtatactcc ttacaggctc caccgaactt cctaataatc
12601 ctttttactt tggaaaatta gatcaagata atactataaa acaagatata cccagttatt
12661 atttttctcc taaagatgaa agcagtgggt taggaa

```

//

LOCUS DODKMMJL\_2 5506 bp DNA linear 12-APR-2021

DEFINITION Campylobacter species strain strain.

ACCESSION

VERSION

KEYWORDS .

SOURCE Campylobacter species

ORGANISM Campylobacter species

Unclassified.

COMMENT Annotated using prokka 1.14.6 from  
<https://github.com/tseemann/prokka>.

FEATURES

source

Location/Qualifiers

1..5506

/organism="Campylobacter species"

/mol\_type="genomic DNA"

/strain="strain"

gene

complement(244..4155)

/locus\_tag="DODKMMJL\_00016"

CDS

complement(244..4155)

/locus\_tag="DODKMMJL\_00016"

/inference="ab initio prediction:Prodigal:002006"

/inference="similar to AA sequence:RefSeq:AAW35464.1"

/note="conserved hypothetical protein"

/codon\_start=1

/transl\_table=11

/product="hypothetical protein"

/protein\_id="Prokka:DODKMMJL\_00016"

/translation="MFISSKTELIQTIKHLTINNKEVKQIDFIYPNFSILHAILKNID  
FHQRKILFKNQILAMEILEILKQTRDNHNNIEVNIHTLNELDAGQNVNLIKDLSSSEIC  
TKVYLEDLEEEIQDKKQKQDFNLFYHTDKNNLCIEFINTLKLAKDSEIDITLDELIE

NIDPDDISSEKFDFFKVKVLEKIGNVIESDFFKNSISPALKNAYEKFIDELLEHIKKL  
AEEKEYEKIKIILSAIAGVTIATVAVL TGGAGLAILAAGL FSLMGSASEYYEFAQRD  
YGTLL TPLAFLATRCAMFIHYINSRL LSCVLIIDKKEIIDLSGFGLYLGSDESNIAS  
NLAYKITLSEEIKSIENIFSEIFLNPEQKDNESKNTANDSKSSNLP AFISTQELS NLY  
LKNNAILKNLQKDIKQFIYFSYIESPNFNSSKLAEFFAQKNQNTQIDLNTTKMSKNYL  
IISNIPNKYNAGL NESL TQEIANYNIQDKYRTIKKNIDT SKKTYDSTRDYSEYSIEMP  
QDENEPYILQLSPFVKISKEAYENSKKAYEDMQEIYKYL TNFVATPQKLPEFAKTAKE  
KLAISENESMIEIVKKTENLRHCERINILAYFDYSKINDKKWLPYFYIKKFFKQNE  
KESIIIEKEDIAHQYLTFLKKE LFEKSDKSSFGNYS LMECLFISFVLYQAKLIFPNIN  
LDLKKYGGSNFVYIKYLEETYVLWTD EYPIYVNN EPTNITAYEVVSQ LKILDKKDYS  
FVENDSSITIDDFNELSKDL DVTNTLDKKI IKLKQMYHLDEQKCIK EFMNLDEEAQQ  
AFFVWMDIEKQISDL SKLLEQMYGKEYLNKAKEQKTSEIFTYAMLKILL SASPFISFT  
AQMLWDFNFKTIEYVIQACIKINKEGFKEFFKEQLGIFTPLKKN SIYHIHIKSNLII  
KARLQQIEKELTHTKIQMILAQEIKSNLIIQKNTSSLNLFITKIKEYFNEKQIKIYWS  
NKYMKQLFIYSNQESNVSKIALMHSIDIQTQKYTIYTYAKLNKLDLASIVAGEFVGIF  
LNYLFPNTYKALQEQYESIVYQLYTFKDD SPLAVIRDHFITYPFAINSKFISFDLKKI  
FYGIDLC TGVFDTHFSFHYEIDQKLEENKEFLLRLLSYLIIDEKRSALRIIKDENET  
IQERDDYTFNQLNSIELIKSEIYILKNTTLEKYYKEVND EINLTAIQAYNEALQIL  
QDFANGLYIVKYEKGKIEDKNKTRRLLEKLNIIIGQNNLKAMYMGINGNEESLKNKDN  
EEGNEEDIESVTKNKQSQKLPPNFIGRLATTIIIEDGLYMG"

gene complement(4422..4781)

/locus\_tag="DODKMMJL\_00017"

CDS complement(4422..4781)

/locus\_tag="DODKMMJL\_00017"

/inference="ab initio prediction:Prodigal:002006"

/inference="similar to AA sequence:RefSeq:CKG86986.1"

/codon\_start=1

/transl\_table=11

/product="hypothetical protein"

/protein\_id="Prokka:DODKMMJL\_00017"

/translation="MVIFKNILLFLFFSTYLLAQEDFTP LEQCTYENEKFWIKILNLC  
PEGNITCDKIVYGVNKNNGKYIVLNGKSISDVNMNFKGYVFKNGIYEYNIFFNFLYI  
SKNKQIIQEYRLKLCEK"

gene complement(4775..5488)

/locus\_tag="DODKMMJL\_00018"

CDS complement(4775..5488)

/locus\_tag="DODKMMJL\_00018"

/inference="ab initio prediction:Prodigal:002006"

/inference="similar to AA sequence:RefSeq:APA47419.1"

/codon\_start=1

/transl\_table=11

/product="lysozyme"

/protein\_id="Prokka:DODKMMJL\_00018"

/translation="MKNLKLQIAQGLDKILEDEDRKQELYVCKFVVVNGVSENKIKAK  
NKDVNIDNDTKNINTTKSNNISSENNAQEKITHLSNDGQNL LKNIEKLR LKPYNDQN  
GKEITSYVKGATIGYGH LIGQNEWDLYKNGITLQEADKLFKSDLLPFENAVKNSINSS  
LAQNEFDALVILCFNIGIDNFKNSSVAKIINGEKTGYKTLKEAWMAWNKSQNKVMRGL  
INRRNAEYKLYTQGGYEKW"

ORIGIN

1 aagtggattt ttgccctgta taaaagttag gatctagata tattggttta tagtctttgt  
61 agggggagtt tcgtttaatg tcgtgtgctt caacaaagc tttggaatat tcttcggtat  
121 aattgcctgt gggtttaata ttttctttaa atagtat ttttccacat  
181 ctaatgctaa tccattgggt gtataaattt tataagtttc actcattttt atcctttctt  
241 aatttaacc atatataaac catcttctat gattatagta gtggctagtc tgcctatgaa

301 gttaggcggg aatTTTTGGG attgTTTgTT tttagTTaca cTTTctatat cTcTcTcgTT  
361 tcTTTcttca ttgtCTTTgt tTTTcaagct tTctTcattt ccattTatcc ccatatacat  
421 agcTTtaaga ttgTTTTgtc ctatgatatt gagcTTTTct agtaaccttc tggTTTTatt  
481 tttatcttct atacattttc cTtctTcata tTtgacaata taaagtccat tagcaaaatc  
541 ttgTaaatt tgtaaagctt cattgTaaGc ttGaatggcT gTtaaattga tTtcatcatt  
601 aacttcttta taatactttt ctaatgtagt gTTTTttagg atataaattt cagattTaat  
661 gagTtctata ctattTaaac tTtgattaaa aaaagtataa tcatctcttt cTtgTatagt  
721 tTcattttca tctTTtatta tcTTTaaagc ggatcTTTTc tcatcaataa tcaaataaga  
781 caaaagtctt tTtaaaagaa attcTTtatt tTctTcaagc tTTtgatcta tTtcataatg  
841 aaaggaaaaa tgagtgtcaa aaactcctgt gcaaagatct atgccataaa aaatTTtctt  
901 taaatcaaag ctaatgaatt ttgaattgat tgcaaaagga taagttataa aatgatctct  
961 tataaccgcc aaaggagaat catctTtaa ggtgTaaagc tgataaacia tgctTtcata  
1021 ttgttcttgc agggctttat aatTTgttgg aaagagataa tTtaaaaaaa taccacaaa  
1081 tTctccagcc acaatagaag caaggtcaag tTtatttagc ttagcataag tataaatagt  
1141 atattTTtga gTTTgtatat ctatgctatg cataagagca atTTtagata cattgctTtc  
1201 ttgattggag tatataaata attgTTtcat gtattTatta ctccaataaa tctTaatTTg  
1261 tTTTtcatTA aagtattctt ttatctTtgt gataaataga tTtaaaactgg atgtattTTt  
1321 ttgtattatt aaattggatt ttatctctTg tgctaaaaatc atTTggattt tagtatgagt  
1381 taattctttt tctattTgtt gcaagcgcgc tTTtattatt aaattagatt ttatgtgtat  
1441 atgatataata ctattctTtt ttagaggtgt aaaaatacca agctgtTctt taaaaattc  
1501 tTtaaatcct tctTTgtTTa tTtTaataca agcttgaata acatattcta ttgTTTTtTaa  
1561 aaaattaaaa tcccacaaca tTtgagctgt aaagctgata aaaggactag cgctTaataa  
1621 aatTTTtaac attgcataag taaatattTc actTgtTTTt tgtTctTTTg cTtattTtaa  
1681 atattctTtt ccatacatct gTtccaaaag cTtTgataaa tctgatattt gTtTctctat  
1741 atccatccat acaaaaaaag cTtTgtTgcgc tTctTcgtct aaattcataa attcTtTaat  
1801 gcattTTtgt tcatctaaat gatacattTg cTtcaattTg attattTTTt tatctaatgt  
1861 attTgtTaca tctaaatctt ttgataattc attaaaaaaa tcatctatag tgatcgaact  
1921 atcattTtcc acaaaagaat aatcTtTTTt gtcaagtatt tTtaataatt gcgatacaac  
1981 tTcatatgct gtaatattTg ttggctcatt atTTacatat attggatatt catctgtcca  
2041 taaaacataa gTtTctctta agtattTtTat atatacaaaa ttactgcctc catattTTTt  
2101 caaatccaaa ttgatattTg gaaaaataag cTtagctTga tacaagacia atgaaataaa  
2161 taaacattcc attaaagaat agTtTccaaa tgaagattTa tccgattTTt caaaaagctc  
2221 tTTTtcaaaa aaagtTaaat attgatgagc tattTTTtTt tctTTTtcta tgatggattc  
2281 tTtTctTtgc tTtTgtTtaa agaattTTTt gatataaaaa taaggaagcc atTTTtTatc  
2341 atTTattTTt ttactgtagt caaaataagc taaaatgtTt attcgtTcgc aatgtcgtaa  
2401 atTTtccgtc tTtTtacta tTtctatcat tgactcattt tctgatattg ctaattTTTc  
2461 tTtagctgtt tTtTgcgaatt ctggtagctt ctgcggTgta gcaacaaaat ttgtTaaata  
2521 tTtataaatc tctTgcatat cTtTcataagc tTtTtacta tTctcataag cTtctTtTgga  
2581 tattTtTcaca aaagggtTta attgTaaaat ataaggTtca tTtTcatctt gtggcattTc  
2641 tatgctatat tcgctataat ctctTgtgct gTcataagtt tTtTtTgaag tatcaatatt  
2701 tTtTtTaaat gTtctgtatt tatctTgtat attatagTtG gcgattTctt gagTtaagct  
2761 tTcattgagt cctgcattgt atTTattTggg gatattTgaa ataatcaaat aatTTTtact  
2821 cattTtagtt gtattTaaat ctattTgtgt gTtTtTgattt tTtTgtTcga aaaattcagc  
2881 tagTttactt gagTtaaaat ttggactTtT tatataagaa aaataaataa attgtTtTaat  
2941 atcTtTtTgc aaattcTtTt aaatagcatt gTtTtTtTaa tataaattag ataattctTg  
3001 cgTtgaaatg aaagcgggta aattgctcga tTtTgaaTca ttagctgtat tTtTactctc  
3061 attgtctTtt tgtTctTgggt tTaaaaagat tTcactaaaa atattTtTcga tgctTtTtTat  
3121 tTctTcgtt aaagtgattt tataggctaa atTTgaaGcg atattgctTt catcactTcc  
3181 aagatataat ccaaaaccac tTaaatcaat aatTtctTtt ttatcaataa tTaaaaacaca  
3241 agataacaag cgagaattaa tataatgaat aaacatagca catctagtgg cTaaaaatgc  
3301 ggctaaaggc gtTaaagTg tgccataatc tctTtTgagca aattcataat actcgctTgc  
3361 agaaccatt aaagaaaata aaccagcagc caaaatagct agTcctgccc cacctgtaag  
3421 aacagctacc actgtggcta ttgTaaacc cgctatagca cTtagtatga tTtTaatTTt  
3481 tTcatattct tTtTctTcgg caagTtTtTt aatgtTtTct aacaactcat cgataaattt

```

3541 ttcataagca ttttttaaa cgggacttat gctatTTTTg aaaaaatccg attctatgac
3601 atttccaatc ttttctaaaa ctttttctt aaaatcatca aatttctcac tgcttatatc
3661 atcaggatcg atgttttcga ttaactcgtc caaggTtGtt atatcttcag aatctttggc
3721 taattctttt aaagtattga taaattcgat acaaagatta tttttatctg tatgataaaa
3781 aagattaaaa tctttacctt gtttcttatc ttgaatttct tcttctaagt cttctaataa
3841 aacttttagtg caaatttcac tgcttgataa atcttttaaa tttacattct gtccagcatc
3901 aagctcatta agggtatgga tatttacttc tatattattg tgattatcac gagtttgttt
3961 taaaatttct agtatttcca tagccaatat ttgattttta aataggattt ttctttgatg
4021 aaaatcaata ttttttaata tagcgtgtaa aatagaaaaa ttaggataaa taaaatcaat
4081 ctgtttaact tctttattgt tgattgttaa atttttaata gtttgaatta actctgtttt
4141 agaacttata aacataaaag attccttata taaagcatta ttatatcatt ttttatttgc
4201 taatattttt tgtctttatt aatctctcct atccatctta taatattacc ctcatcatca
4261 atctctactt ctaaactctt gtatttgTta taaaatttag gagctaagat ttcattaatt
4321 aggattttta taactttaaa aacttcttgt aattcttatt gcatcttttt aactttttac
4381 atattctagg tatttgTtGt tgcttgTtGc ctttgTtGtGt tctatttttc acataatttc
4441 agacgatatt ctgttataat ctgcttGttt ttagaaatat ataaaaaatt attaaaaata
4501 ttgtattcat aaataccatt tttaaaaaca tatcctttta aattcatatt tacatcacta
4561 atagacttac catttaggac aatatatttt ccattatttt tattgacacc cacatataca
4621 attttatcac aagttatatt accctctgga catagattta aaatttttat ccaaaacttt
4681 tcattttcat aggtacattg ctctagtgga gtaaaatcct cttgCGctaa caaataagta
4741 ctaaaaaata aaaacaataa tatattttta aaaattacca tttttcataa cctccttgag
4801 tgtaaagcct atattcagca tttctcctat taattagccc cgcacttact ttattttgac
4861 ttttgTtcca cgccatccaa gcttccttta atgttttata acccgTtttc tctccattga
4921 tgatttttagc aacagaagaa tttttaaaat tatcaatccc tatattaaaa cataatataa
4981 ccaaggcatc aaattcgTtc tgtgctaagg aagagTttat tgaatttttt acagcatttt
5041 caaagggtaa caaatcgctt ttaaacaatt tatccgcttc ttgtaaagta ataccatttt
5101 tatacaaatc ccattcattt tgccctataa gatgtccata tccgatagtt gcacctttaa
5161 catatgaagt aatttctttt ccattttgat cattataagg tttgagtctt agcttctcta
5221 tattttttta aagattttga ccatcattgc ttagatgagt gattttttct tgagcattgt
5281 tttcactaga acttatatta ttgctttttg tagtgTttat attctttgtg tcattatcta
5341 tatttacatc tttatttttt gcttttattt tgttttcgct aacccatttt accaccacaa
5401 atttacaac ataaagctct tgttttctat cttcatcttc taagatttta tctaatecct
5461 gtgcgatttg aagtttttaa tttttcattt ttgcaggagc taaaaa

```

//

```

LOCUS      DODKMMJL_3                5277 bp    DNA        linear      12-APR-2021
DEFINITION Campylobacter species strain strain.
ACCESSION
VERSION
KEYWORDS   .
SOURCE     Campylobacter species
  ORGANISM Campylobacter species
            Unclassified.
COMMENT    Annotated using prokka 1.14.6 from
            https://github.com/tseemann/prokka.
FEATURES   Location/Qualifiers
  source    1..5277
            /organism="Campylobacter species"
            /mol_type="genomic DNA"
            /strain="strain"
  gene      19..135
            /locus_tag="DODKMMJL_00019"
  CDS       19..135
            /locus_tag="DODKMMJL_00019"
            /inference="ab initio prediction:Prodigal:002006"

```

```

/inference="similar to AA sequence:RefSeq:CKG86393.1"
/codon_start=1
/transl_table=11
/product="methyltransferase small"
/protein_id="Prokka:DODKMMJL_00019"
/translation="MKNLKLQIAQGLDKILEDEDRKQELYVCKFVVVNGVKV"
gene 132..3647
/locus_tag="DODKMMJL_00020"
CDS 132..3647
/locus_tag="DODKMMJL_00020"
/inference="ab initio prediction:Prodigal:002006"
/codon_start=1
/transl_table=11
/product="hypothetical protein"
/protein_id="Prokka:DODKMMJL_00020"
/translation="MKIKNFTLITSNHNLEIELKNLTKNANKIIFICSDFDGYKEAEN
SLYKTLHTIEDNFKIDNTKTFKIIHLNQTNKDEITKEQKFSSDKNLSSIKKIIYNNLK
LLNDTINQENKTLNKIIDESNEKNIENFLKEIQKELNILLKNIKESNYFDQEIKPKI
QVTLDTLFTNLLKNIAQSNDEYKQIIRAVAKFFINILDSITSLLKPKISLIKKNPYVL
IVNTLFEAYNSYSEYQEYKEKKYYYDFAYPLLELITSKLYPIIALCNEEILSDVLIID
DKVLLDFSSYTNAPSISLYKNSFYKIILDEEFQGVFDNFLNENLKFENEKLDNTLLVN
SSLNNSDRTLKAINLNISKLNHFFYAEPDLNSSLVEMILDKKNADQINTTKMGKN
YLFITNPPQLNNAAGLCEDLYQKKGAIKRNPKALTKNEKLALKGDFPSKRDYGSYFI
ERDVKKEDDFVLQCPFAKLDGQIYQKYKGYFNFYNQTYSWMKLYLLEYINERFEYER
FKQDFAYIDNFFKLPKELEKISEKEKEKVKEYVELFNDYLDKINFRYDQIQFFLDSEP
LMFKTYENVDFKKYSPLTVVLLTLTYVLQKDLAFTQEYSLGVKNIAIPNPDYGDKEI
SLNYQRKIPNYFNEYILFIPDDIYFYDNDKKIYIFLSKELNKNKKEDEVIYLDLAK
AMFENDLKEDDQTYVKFLNTLNENFDDEIEFEENIQTNQTLPTKKDLKSIQEIMLDN
ELAKLSLDITFFNIKQLFPFTEFFMSQPDFFKKMILFFINSSDKKYYGNKLFSSFK
AHFFKELGIFYALNPKGRFIKIIIPKNKKPFNKLFLYQIGTNYYYFSQSEYASELKSK
SFSRLDQAKQIHLISKARKQLAIDFSIKVSKNLSADVLKNLAGSFIDTLLPTNYERLK
ILYEKLMYEKLTYNDFPLAVKKEEYITYPLLINSRFMSFDLSEFIFGSLCTGGLNY
YPSIACTTTSSEAREFALKRLLSYIILDEKRSFMEKINEGKYILNDKEFFEKNIE
LRNCNIYKLEHFQRKEEYKQNPMIKQHPILAYNDTIQILYEYINGIYNTIQDEKGNF
IEDRQKARLMENLEAIGQHNLEVMYKGINEENDETEKIISQNKRHYKNIENLITNKK
SQDYSNKFIGRLATTIIMEDGLYMG"
gene 3665..4957
/locus_tag="DODKMMJL_00021"
CDS 3665..4957
/locus_tag="DODKMMJL_00021"
/inference="ab initio prediction:Prodigal:002006"
/inference="similar to AA sequence:RefSeq:CKG86288.1"
/codon_start=1
/transl_table=11
/product="thioredoxin reductase"
/protein_id="Prokka:DODKMMJL_00021"
/translation="MSETYEIYTPEGFILNVDKQSGKILFSESKSKKPTGKYTQEYSK
ALFEADRILRTSPYINYQPRYLDPEFHTGQKSTLLEFKDWQSIYLDKPIKGSIAPWTK
AEKAYNSLKTCKERYKYLVRSGIRSVVIDIPYEAIGAVDEKGNVDPKYEELYRTVD
DNKHNLRSSLFHNEWGMAAGILGDYKYLANDMSQNGFNARFIQATILYIQLSGSSIL
DKPNLLGAIYGYADIAVGSLVGVHKNPLREQQIKTLAKTLKPDEFGLPFIDEIMGV
DWVIDLNVYQFNFDWAGKIYRALRSDVVEGKIKDPRDIDSTYESRREFDRHMDGYQNG

```

MTINYHVDINNYRSEESAKLFMDSLVLEAKLAALTPPQGYPNAPYYFTPERLEWDYKN  
HQLDKLLDPRIPAIYRYNFPRELRAKILKFGEENGIKE"

ORIGIN

1 ttttttagctc ctgcaaaaat gaaaaattta aaacttcaaa tcgcacaagg attagataaa  
61 atcttagaag atgaagatag aaaacaagag ctttatgttt gtaaatttgt ggtggtaaat  
121 ggggttaaag tatgaaaata aaaaatttta ctttaattac atcaaatcat aatttagaaa  
181 tcgagttaaa aaatcttacc aaaaatgcta ataaaattat ttttatatgc agtgattttg  
241 atggatataa agaagctgag aattctctgt ataaaacatt acatactatt gaagataatt  
301 ttaaaattga caatacaaaa acttttaaaa tcatacattt aaatcaaacc aataaagacg  
361 aaatcacaaa agaacaaaaa ttttagctctg ataaaaattt atctagcatt aaaaaatta  
421 tctataataa tttaaaactt ttaaatagata caatcaatca aaatgaaaat aaaacactca  
481 ataaaattat tgatgaaagc aatgaaaaaa atatcgaaaa ttttttaaaa gaaattcaaa  
541 aagaattaaa tatattacta aaaaatatca aagaatctaa ttattttgat caagaaatca  
601 agccaaagat acaagttact ttagatacgc tttttaacac acttttaaaa aatattgcc  
661 aatctaataa tgatgaatat aagcaaatta ttagagctgt agcgaattt tttatcaata  
721 tattagattc tataaccagc cttaaaaagc ccatttcttt aattaaaaaa aatccttatg  
781 ttttgattgt aaatacatta tttgaagctt ataattctta ctctgaatat caagagtata  
841 aggaaaaaaa atattattat gattttgctt atccactttt agaacttatc actagcaaac  
901 tttatcctat tattgcttta tgcaatgaag agattttatc tgatgtgta attatagatg  
961 ataaagtatt attagatttt tcatcttata ctaatgcacc ttctatcagt ctttataaaa  
1021 atagttttta taaaattatt ttagatgaag aatttcaagg tgttttgat aattttttag  
1081 aaaataatct aaaatttgaa aatgaaaaat tagacaacac tcttttagtg aattctagtt  
1141 taaataattc tgacacaaca ttaaaaaagg cgataaattt aaatatctcc aaactcaatc  
1201 atttctttta tgcagaatac cctgatttaa atttctccat gctagtagaa atgatactgg  
1261 ataaaaaaaa tgctgatcaa atcaatacaa ccaaaatggg taaaaattat ttatttatta  
1321 ccaatccacc acagcttaat aatgcagggc tttgcgaaga tttgtatcaa aaaaaattag  
1381 gagcaataat aaaaaatcgc ccaaagctc ttacaaaaaa tgaaaaactt gcattaaaag  
1441 gcgattttcc tagcaaaaaga gattatgggt cttattttat agaaagagat gttaaaaaag  
1501 aagatgattt tgccttgcaa ctttgcctt ttgcgaaact tgatggacag atttatcaaa  
1561 aatataaggg atattttaat ttttataatc aaacatattc ttggatgaaa ctttatttat  
1621 tagaatatat aaatgaacga tttgaatatg aaagatttaa acaagatttt gcttatattg  
1681 ataacttttt taaattacct aaagagcttg agaaaattag cgaaaaagaa aaagaaaaag  
1741 taaaagaata tgtcgagctt tttaatgatt atttggataa gatcaatttt cgttatgatc  
1801 aaatacaatt ctttcttgac tcagaacatc taatgttcaa aacatatgaa aatgtagatt  
1861 ttaagaaata ctcaccttta acggttggtt tattgacttt aactttgat gttttacaaa  
1921 aagacttagc ttttacgcaa gaatattctc ttggtgtaa aaatattgca attccaaatc  
1981 cagattatgg cgataaagaa atttcactta attaccaaag gattaaaata ccaattatt  
2041 ttaatgagta tatcttattt atccccgatg atatttattt ttatgataat gataaaaaaa  
2101 tttacatctt tttatccaaa gagttaaata aaaataaaaa agaagatgaa gttatctatt  
2161 tagatgaatt agctaaagct atgtttgaaa atgatcttaa agaagatgat caaacttatg  
2221 tgaaattttt aaacacctta aatgaaaact ttgatgatga aattgaattt gaagaaaata  
2281 tacaacaaa tcaaacactt cttacaaaaa aggatttaga taaaagtatt caagaaatta  
2341 tgcttgataa tgagcttgca aaactatcct tagatatcac tttttttaat atcattaagc  
2401 aactttttcc ttttacagaa ttttttatga gtcagcctga tttttttaa aaaatgattt  
2461 tattttttat aaattcaagc tctgataaaa agtattatgg caataaatta ttttctagtt  
2521 ttaaagcaca tttttttaa gaactaggga tattttatgc acttaatcct aaagggcggt  
2581 ttataaaaat catcccaaaa aataaaaagc cattcaataa gcttttttta tatcaaatag  
2641 gaacaaatta ttattatttt agtcaatcag aatatgcaag cgagttgaaa aaatcaaaga  
2701 gtttttcaag attggataaa gctaagcaaa ttcatttgat atcaaaagca agaaaaaat  
2761 tagctattga ttttctatt aaagtaagta aaaatttaag tgcggatgta ttaaaaaatt  
2821 tagcaggttc ttttattgat acacttttgc ctacaaatta tgaaagatta aaaattttat  
2881 atgaaaaact aatgtatgaa aaattgactt acaattatga ttttcttta gctgtaaaaa  
2941 aagaagagta cataacctat ctttatttga taaattctag atttatgagt tttgatttat  
3001 ctgagtttat ttttggttct ttattgtgca caggtgggct taattattat ctagtattg

```

3061 cttgcactac aacttcaagt gaagctagag aatttgcctt aaaaagactt ttatcttata
3121 ttatttttaga tgagaaaaga agtgctttta tggaagataa aatcaatgag ggcaaataa
3181 tcttaaataga taaggaatth tttgaaaaaa acaatataga acttagaaat tgtaatatat
3241 ataagctaga acattttcaa agaaaagaag agtataaaac acaaaatcct atgataaaac
3301 aacaccctat cttagcttat aatgatacta tacaattttt atatgaatac ataatggaa
3361 tttacaatac tatacaggat gaaaagggtta atttcataga agataggcaa aaggcaagaa
3421 gattgatgga aaatttagaa gccataggac aacataatth agaagtgatg tataagggga
3481 taaatgaaga gaatgatgaa acagaaaaaa taatatcgca aaacaaaaga cattataaaa
3541 atattgagaa ttttaattacc aataataaat cccaagatta ttctaataag tttataggca
3601 ggctagccac tactataatc atggaagatg gtttatatat gggataaatt aagaaaggat
3661 aaaaatgagt gaaacttatg aaatttatac acccgaaggt tttatattaa atgtagataa
3721 acaaagcggga aaaatactat tttcagagtc aaagtcaaaa aaacctacag gcaaatcac
3781 ccaagaatat tccaaagctt tgtttgaagc cgatagaatt ttaagaacct ctccttatat
3841 taattatcaa cctaggtatc tagatcctga atttcacaca gggcaaaaat ccactttgct
3901 tgaattttaa gattggcaa gcatatattt aaaagatccc attaaaggaa gcatagctcc
3961 ttggactaaa gcagaaaaag cttattataa ctctttaaaa actaaaaaag aaagatataa
4021 atatttagtt ataagaagtg gtataagaag tgttgttata gatatacctt atgaagccat
4081 aggagctgta gatgaaaaag gaaatgtaga tcctaagtat gaagaattat atagaacagt
4141 agatgataat aaacataatc taagatcaag tttatttcat aatgaatggg gtatggcagc
4201 aggaatacta ggtgattata aatatctagc taacgatatg tctcaaatg gttttaatgc
4261 aagatttatc caagcaacta tactttatat acaattaagc ggaggaagta gtatactaga
4321 taaacctaat ttattgggtg ctatttatgg ttatgcagat attgcagtag gaagtggttt
4381 agtaggagtg cataaaaatc ctttaagaga acaacaaatt aaaaccttag ctaagacttt
4441 aaaacctgat gaatttggtta tgcttccttt tatagatgag attatggggag tagattgggt
4501 gattgattta aatgtttatc aatttaatth tgatgcatgg ggaaaaatat atagagcctt
4561 aagaagtgat gtagttgagg gtaaaataaa agatccaaga gatatagatt ctacttatga
4621 aagcagaagg gagtttgatc gccatatgga tggatatcaa aatggtatga caattaatta
4681 ccatgtagat ataaataatth atagaagcga agaatcagct aaattattth tggattcttt
4741 ggtatttagag gccaaactcg cagccctcac tcctcctcaa ggctatccta atgcacctta
4801 ttattttacc cctgaaagac tagaatggga ttataaaaat catcaattag acaactcct
4861 tgatccaaga atccctgcta tttatagata taatttcca agggaactth gagctaagat
4921 actcaaattt ggtgaagaaa atggcattaa agaataaagt aacctcatag gcaggctagc
4981 cactactata atcatggaag atggtttata tatgggataa attaagaaag gataaaaatg
5041 agtgataata aagatattth cgagatctat acttctaag gacttatatt agaagttgat
5101 aaaaatacaa atcaaattat atttgataaa agaaaagatg ggcgtgaagt aggcaaatac
5161 acccaagaat attccaaagc tttgtttgaa gccgatagaa ttttaagaac ctctccttat
5221 attaattatc aacctaggtta tctagatcct gaatttcaca cagggcaaaa atccact

```

//

```

LOCUS      DODKMMJL_4          4481 bp   DNA       linear     12-APR-2021
DEFINITION Campylobacter species strain strain.
ACCESSION
VERSION
KEYWORDS   .
SOURCE     Campylobacter species
  ORGANISM Campylobacter species
            Unclassified.
COMMENT    Annotated using prokka 1.14.6 from
            https://github.com/tseemann/prokka.
FEATURES   Location/Qualifiers
            source          1..4481
                        /organism="Campylobacter species"
                        /mol_type="genomic DNA"
                        /strain="strain"
            gene            complement(214..417)

```

CDS /locus\_tag="DODKMMJL\_00022"  
 complement(214..417)  
 /locus\_tag="DODKMMJL\_00022"  
 /inference="ab initio prediction:Prodigal:002006"  
 /codon\_start=1  
 /transl\_table=11  
 /product="hypothetical protein"  
 /protein\_id="Prokka:DODKMMJL\_00022"  
 /translation="MDNITIIIEKTLNIFLILVIKNNHRLFTIGGKIIHPITMRNSLN  
 LSGLCPIKGDIIQAKIKNIIQQI"

gene 627..875  
 /locus\_tag="DODKMMJL\_00023"

CDS 627..875  
 /locus\_tag="DODKMMJL\_00023"  
 /inference="ab initio prediction:Prodigal:002006"  
 /inference="similar to AA sequence:RefSeq:CKG86895.1"  
 /codon\_start=1  
 /transl\_table=11  
 /product="methyltransferase small"  
 /protein\_id="Prokka:DODKMMJL\_00023"  
 /translation="MSKDYKDYFIYDDSLAFYPKLNGEFREIQTQNFQKRYTIKFHQ  
 NTFSGFSATLFYDIQKDEYIASFRGTEGIVSMDAFVPI"

gene 1121..1555  
 /locus\_tag="DODKMMJL\_00024"

CDS 1121..1555  
 /locus\_tag="DODKMMJL\_00024"  
 /inference="ab initio prediction:Prodigal:002006"  
 /codon\_start=1  
 /transl\_table=11  
 /product="hypothetical protein"  
 /protein\_id="Prokka:DODKMMJL\_00024"  
 /translation="MGILKKVYIVWGVFWGIIIFLSSLYAYFSDIEFFGDMKIAFFI  
 YSYPLLPYISYLTQETIKSKNIFLYFSLFFFILLYFALFFFISGGFFIYVIILGIYT  
 ILFLIISIKFRKELSYFSLFCIFLYIFLYLFIFYIELKNE"

gene 1659..1955  
 /locus\_tag="DODKMMJL\_00025"

CDS 1659..1955  
 /locus\_tag="DODKMMJL\_00025"  
 /inference="ab initio prediction:Prodigal:002006"  
 /codon\_start=1  
 /transl\_table=11  
 /product="hypothetical protein"  
 /protein\_id="Prokka:DODKMMJL\_00025"  
 /translation="MKILKSLYIIWMIFWGFMAILGYMGYDATFTKMFFFLVILYLF  
 PLLPYLHYLIFEKTKNKNIFISICYRLLFYFNIFMWNKFFNIFYNDYFIYDYL"

gene 1927..2151  
 /locus\_tag="DODKMMJL\_00026"

CDS 1927..2151  
 /locus\_tag="DODKMMJL\_00026"  
 /inference="ab initio prediction:Prodigal:002006"  
 /codon\_start=1  
 /transl\_table=11  
 /product="hypothetical protein"  
 /protein\_id="Prokka:DODKMMJL\_00026"



```

/translation="MITLYMIICSAILLWKFKNLRLYFYIILCIFTYLYIVLHIFIA
CYEIEWTDILLDKDVRIYIYKEIINLLTEQ"
gene      2311..2616
/locus_tag="DODKMMJL_00027"
CDS       2311..2616
/locus_tag="DODKMMJL_00027"
/inference="ab initio prediction:Prodigal:002006"
/codon_start=1
/transl_table=11
/product="hypothetical protein"
/protein_id="Prokka:DODKMMJL_00027"
/translation="MGVFRKFYIVWVFCISGFAISPAVGHNPNRVYEFFVMLGWIIIF
PLILLMLYRFFSLCEIKFLYIALLLLLLYPIALILLYMFYHNSFYVTLYIFLSLFLK"
gene      2626..4158
/locus_tag="DODKMMJL_00028"
CDS       2626..4158
/locus_tag="DODKMMJL_00028"
/inference="ab initio prediction:Prodigal:002006"
/inference="similar to AA sequence:RefSeq:AAW35443.1"
/note="conserved domain protein"
/codon_start=1
/transl_table=11
/product="hypothetical protein"
/protein_id="Prokka:DODKMMJL_00028"
/translation="MKEKINKLRDYAELAWASYFYFDLKGYLQENETIVTLSELVSL
SYNGKIAGKKEKVRQEYSFIGKGELNGEFGELQARNFSQRYEIKFHQANTLSGFSATL
FYDKEKDKFVVGIRGTEVSFKDLKATWETALDVTQDLVLSLNGNLQSSPLLEFLEQVD
KIIKNENKSIIFVGHSLGGYLAQMALIYCDIKYKDKLSFSPNEVYTFNAPSVMGNFP
NIAINPNTIKIMQDLLGKYTIDVSEKITHIYDNGGVEIIASAQYGASNALDIYTGKND
HSIKPLVNTLYFYSYLLELKENEDKIIKNNSLKESLENLNFHMKNIQIYTETFLKNN
DINNKNFARKNGPLGLFRSSPEKINHFYFLSLIATIMQETNDILEELGDNYYTNYKA
PTISQTKIIDFILKVQEKEYILILDKNDFNKYRKDCSFINNQENLAHKIAIGEFRIIF
IAVYEDMKCLENINNITKIYGYNSKVYRLKDQIWDERYLGGVCKISQALYFSGKAKIG
II"

```

ORIGIN

```

1 aaaaagtcag acaagaatat agttttattg gcaaagtgga attaaatgga gaatttggag
61 aattacaagc tagaaatttc tctcaaagat atgagattaa attccatcaa gccaacactt
121 taagtggcct tagtgctact ttgttttatg ataaagaaaa agataaattt gttgtaggaa
181 ttagagggac tgaatgcgga ttctaaaaat actttatatt tgctggatta tattttttat
241 ctttgcttgg ataatatcac ctttaattgg gcataatcca gatagattta aggaatttct
301 catagtgatt ggatggataa ttttgcctcc aatagtgaac aatctatggt tatttttaat
361 aacaagaatt aaaaaatat ttgataaggt tttttctatt attgttatat tgtccattgg
421 caattttatt atatcttata tttgattaaa aggaaaaaaa tatgaagcaa caaatcaaga
481 atcttagaga ctatgctgag ttagcttgag caagctatct caaccttatc tatattgatg
541 gacaaaaaac taatgatttc acaataggaa cagaaagaat cttaaaagat ggagaaaata
601 tagaaaaatt taaatattat aaagcattgt ctaaagacta taaagattat tttatttatg
661 atgattcggt agctttttat ccaaaactca atgggtgaatt tagagaaatc caaacacaaa
721 attttgcaaa acgctataca atcaaatttc accaacccaa tacttttagt ggtttttctg
781 ctacactttt ttatgacatt caaaaagatg agtatattgc tagttttcga ggaacagaag
841 gaattgtaag tatggatgca tttgtgccga tataggactt acttttggtg aaggagattt
901 tcaagctaag ggcttaaaac aatttttatt agatatagca cctataggac attctctggt
961 gggtatttag ctcaaatggc tttgatatat tgtgattaaa tataaagatt tatactttta
1021 atactcttag tattttacgtt tgaatgttc ctagtgtggt tatattttga tttttaaaaa
1081 agtaggataa tttttattaa aatattaaaa aggaaaataa atgggtatat taaaaaagt

```

1141 atacattggt tggggggtct tttggggaat ttttttttg tttagttcct tatatgctta  
1201 ttttagtgat atagaat tgggtgatat gttaaagatt gcatttttta tatattctta  
1261 tccattgctg cttacatat catat ttaac actacaagaa actat taaat ccaaaaatat  
1321 ttttctttat ttttctttat ttttctttat tttgctttat tttgctttat ttttctttat  
1381 ctctgggagga ttttttattt atgtaataat attaggtatt tatacaatat ttttttaat  
1441 aatatctatt aaat ttagaa aagaact ttc ttatttttt tctttattat tttgtatttt  
1501 tttatacatt tttttgtatc tttttatttt ttatatagaa ttaaaaaatg agtaataaag  
1561 ctcaaattaa caatctcaaa aattacgcta aacttgatata gattgggttt ttttaatttt  
1621 ttaataataa tttaaatttc aacaaaaaag gaagtagtgt gaaaatatta aaaagtttat  
1681 atattatttg gatgatattt tggggatttg gggctatttt aggttattat atgggatatg  
1741 atgcaacttt tactaaaatg ttcttttttc ttgttatatt atatcttttt ccattgtttgc  
1801 cttatttgca ttatttaatt tttgagaaaa caaagaacaa aatatatttc atttctattt  
1861 gttattaccg cttattattt tactttaata tattcatgtg gaacaaattt ttttaacattt  
1921 tttataatga ttactttata tatgattatt tgtagtgcta taatcttatg gaaatttaaa  
1981 ataaatttaa gattatattt ttacataatt ttatgtattt ttacttatct ctatatagtt  
2041 ttacatattt ttatagcatg ttatgaaata gaatggacag atatactgct agataaagat  
2101 gtaaggatat atattttaca agaaataatt aatttgctta cggagcaata atttgtttta  
2161 taataaatct ttttttata ggggggataa attaatgaaa acccaaatca acaatttaag  
2221 agattatgta gaacttgcat gggctagtta tttttatttt aatttttaaa aaagtagaaa  
2281 atttactaaa aatattaaaa aggaaaaata atgggtgtat ttcgtaagtt ttatattggt  
2341 tgggtagtat tttgtataag tggatttgct atttctcctg ctgtagggca taatccaaat  
2401 agagtgtatg aattttttgt aatgctaggt tggattattt tccctttaat tctattaatg  
2461 cttatcgcct tttttctct ttgtgaaata aagtttttat atatagcatt gctattgtta  
2521 ctttattatc ctatagcttt gatattgtat tacatgtttt attatcataa tagtttttat  
2581 gttacattat atattttttt atcattattt aaataaagga taattttgaa agaaaaaatc  
2641 aataagctaa gagattatgc agagcttgca tgggctagtt atttttattt tgatttaaaa  
2701 ggttatatat tacaagaaaa tgaactatc gttactttaa gtgagcttgt aagtttaagt  
2761 tataacggaa aatagctgg aaaaaaagaa aaagtcagac aagaatatag ttttattggc  
2821 aaaggtgaat taaatggaga atttggagaa ttacaagcta gaaatttctc tcaaagatat  
2881 gagattaaat tccatcaagc caacacttta agtgggtttta gtgctacttt gttttatgat  
2941 aaagaaaaag ataaatttgt tgtaggaatt agagggactg aagtttcttt taaagattta  
3001 aaagcgacat gggaaactgc ttttagatgta acccaagact tggttttatc cctcaatggc  
3061 aatctccaat cttctcctct tttagaattt ttagaacaag tagataaaat catcaaaaat  
3121 gaaaataaaa gtatcatatt tgtaggacat tcattgggtg ggtatttagc tcaaatggct  
3181 ttgatataat gcgatattaa atataaagat aaactatctt ttagccctaa tgaagtttat  
3241 acttttaatg cccttagtgt ttatggttgga aattttccta atatagctat caaccctaat  
3301 actataaaaa ttatgcaaga tcttttagga aaatatacta tagatgtttc agaaaaaatc  
3361 actcatattt atgataatgg tggagttgaa atcattgctt cagctcaata tgggtgcaagc  
3421 aatgccttag atatatatac agggaaaaat gatcactcta taaaacctct tgttaatact  
3481 ctctattttt attccttatct ttttagagctt aaggaaaaat aagataaaat aataaaaaat  
3541 aattctttta aagaaagttt ggaaaattta aatcatttca tgaaaaatat tcaaatttat  
3601 acagaaactt ttgtgttaaa aaataatgat attaataata aaaattttgc tcgtaaaaat  
3661 ggacctcttg ggcttttttag aagctcccca gaaaaaatca atcattttga atactttctt  
3721 tcattaatag ccaccataat gcaagaaacc aatgatattt tagaagagct tggagataat  
3781 tattatacaa actacaaagc tcctaccatt agtcaaacaa aatcataga ttttatttta  
3841 aaggtgcaag aaaaagaaaa atatat tttta atctttgata aaaatgattt taataaatac  
3901 agaaaagatt gttcctttat taataatcaa gaaaatttag ctcataaaat tgccattggg  
3961 gaatttagaa ttttcattgc agtttatgaa gatatgaaat gtcttgaaaa tattaacaat  
4021 ataacaaaaa tatatggata taattcaaaa gtttataggc taaaagatca aatttgggat  
4081 gagcgttatt taggtggagt ttgtaaaata tcacaagctt tatatttttag tggaaaagcc  
4141 aaaataggta ttatttagga aaattatgac aggtagagac tttttatatt ctattcataa  
4201 agataaaaaa agtattttatt tttttgtga aaataaaaagc atcattgatt gtcaaagcat  
4261 ttatgaagaa ctttataaat tagaagcaac gacagatttt acttttgaag aactccaaag  
4321 ctatcaagct tatactctcc taaactccac cctacttaca ggctccaccg aacttcctaa

4381 taatcctttt tactttggaa aattagatca agataatact ataaaacaag atatacccag  
4441 ttattatttt tctcctaaag atgaaagcag tggtttagga a

//

LOCUS DODKMMJL\_5 1234 bp DNA linear 12-APR-2021

DEFINITION Campylobacter species strain strain.

ACCESSION

VERSION

KEYWORDS .

SOURCE Campylobacter species

ORGANISM Campylobacter species

Unclassified.

COMMENT Annotated using prokka 1.14.6 from  
<https://github.com/tseemann/prokka>.

FEATURES Location/Qualifiers

source 1..1234  
/organism="Campylobacter species"  
/mol\_type="genomic DNA"  
/strain="strain"

ORIGIN

1 cttacaggct ccaccgaact tcctaataat cttttttact ttggaaaatt agatcaagat  
61 aatactataa aacaagatat acccagttat tatttttctc ctaaagatga aagcagtggt  
121 ttaggaaaac ttagcatcctt ttataaaaat gatgagcttt gcttgcttaa ttattttata  
181 ttagaaaatt ctttaaatat caaattagaa tgcttaagca agcaaagctt agaatacaaa  
241 gatttaattt caaaccttt taaaactcaa aaaaccacac aagtagatac aaaacaaagc  
301 atagccaaac ttcacgctct tttagaaaat caaaacctag aatgtatcca tggaggcaaa  
361 gtcatactta aatcaaaaca aggaaaatcc tttaaaagtg atggtatccc tataatgcta  
421 gaaagtgatt tattaaactc tagtatagta gcttgccta ataccatagc aaatgtaagt  
481 tatccttgta ctaaggtagt ggatattaaa ggctccttat ctcaaagaa agtaaataat  
541 gaatttgtaa tcttacaaga actcatctca gcttgcacta cagataaagg ctttgcttta  
601 aaagtaagct ttactccaag taagttttaa tttgatcaca gctttgatcc tgaggagggc  
661 ttaggagaac aaagtaaaaa tcaaataagag ttaaaagaac ctataataag acttcattat  
721 aaaagtgata gatttcaaaa agataattta cctatctata atcttttaat caataatgaa  
781 aaaaaagaac aagataaggc tttaaatgaa ttcaatatag aacaaaaaga tttaaaagat  
841 atagaggatg taaatatctt taatcaattt gaacaaggct ttagtaaaga ttatgaattt  
901 aaagaattaa atcttagctt tgatactaata ttaatcaagc tttatttcat tatcccaaaa  
961 aacattgcca aagtttataa aagtgcctat aaagaatttg aaaacaaaga tctaggagca  
1021 gggtatttta cacagctaca tgagtatgat aaaatcatca aaaatgcttt agaagataat  
1081 aaagaattaa acgaatatca ttttaactttt ttagctcctg caaaaatgaa aaatttataa  
1141 cttcaaactg cacaaggatt agataaaatc ttagaagatg aagatagaaa acaagagctt  
1201 tatgtttgta aatttgtggt ggtaaattggg gttta

//

LOCUS DODKMMJL\_6 654 bp DNA linear 12-APR-2021

DEFINITION Campylobacter species strain strain.

ACCESSION

VERSION

KEYWORDS .

SOURCE Campylobacter species

ORGANISM Campylobacter species

Unclassified.

COMMENT Annotated using prokka 1.14.6 from  
<https://github.com/tseemann/prokka>.

FEATURES Location/Qualifiers

source 1..654  
/organism="Campylobacter species"

```
/mol_type="genomic DNA"
/strain="strain"
```

ORIGIN

```
1 ttcaactcac aggtggagga tatgaagaat taggtataaa aagaggaatt tataattatg
61 ctgataatct tttagaaata ggtataggta tggcagggat acataaaaat cctttaaggg
121 ctaaattagt aaaagattta gctaaaacta tacagcctga tgaatttggg atgctacctt
181 ttatagatga gattatggga gtagattggg tgattgattt aaatcgatat aaatttgctc
241 ttgatgaaga aggtagaatc atttgggctt tatatgatga tattgaaaaa ggtaaattaa
301 aagatccaag agatgtggat tctactcctg aaagcaggaa agaatttgat cattatatgg
361 atggatataa aatggaatg gaaactagat tcgatgctga tattccaaat gattgggggtg
421 atcgacaagc cactttattc aaagataccc tagtattaag tgccaaactc gcagccctca
481 ctctcctca aggttatcct aatgctcaa gatactatag ccctgaaaga ctagaaatta
541 tttataaaaag acataagctt gataaactcc ttgatccaag aatccctgct atttatagat
601 ataatttccc aagagaactt agagctaaga tactcaaatt tgctgaagaa aatg
```

//

>>BfR-CA-15829\_min\_cov\_30 putative plasmid location

LOCUS FAFJHLOP\_1 3230 bp DNA linear 12-APR-2021

DEFINITION Campylobacter species strain strain.

ACCESSION

VERSION

KEYWORDS .

SOURCE Campylobacter species

ORGANISM Campylobacter species  
Unclassified.

COMMENT Annotated using prokka 1.14.6 from  
<https://github.com/tseemann/prokka>.

FEATURES Location/Qualifiers

source 1..3230

/organism="Campylobacter species"  
/mol\_type="genomic DNA"  
/strain="strain"

gene complement(443..1720)

/gene="trxB\_1"  
/locus\_tag="FAFJHLOP\_00001"

CDS complement(443..1720)

/gene="trxB\_1"  
/locus\_tag="FAFJHLOP\_00001"  
/inference="ab initio prediction:Prodigal:002006"  
/inference="similar to AA sequence:RefSeq:CKG86610.1"  
/codon\_start=1  
/transl\_table=11  
/product="thioredoxin reductase"  
/protein\_id="Prokka:FAFJHLOP\_00001"  
/translation="MSDTYEIYTPHGSILDVNKKTNEIYFDQSSKPTGKYTKKEYSKAL  
FKAWEIMENSPYKDYEPYLDPNFYTGQKSTLVEFKDWQSIYLKEPIKGSIPWTKAE  
KAYYKSLKTKRERYKYLVRISGIRSTVIDIPYDAYANVDEKGNLINEDYKELYKEVEA  
NRGLAHLSDGYLFMGEWELAAGILGDIKGFIGALQLSMTGFKARTQAVNFLLIQLGHE  
QGFKSLYDSYAYRGLTDGIHKNPLKAQMLKDFSKNPPYDEFGLMPFLDELIMGVDWVID  
LTEYEFADDADGKAIRSLDDDLVKGKLDPRDIDSTPESRREFNREMWAYRRGSVAFY

```

NTDIPNDWTNQEAKLYIDSLILESKLAVLTPPQGYPNAPYYWVPEHLEYVYKHKHLDK
LLDPRIPAIYRYNFPRELRAKILKFGEENGIKD"
gene      complement(1792..3069)
          /gene="trxB_2"
          /locus_tag="FAFJHLOP_00002"
CDS       complement(1792..3069)
          /gene="trxB_2"
          /locus_tag="FAFJHLOP_00002"
          /inference="ab initio prediction:Prodigal:002006"
          /inference="similar to AA sequence:RefSeq:CKG86610.1"
          /codon_start=1
          /transl_table=11
          /product="thioredoxin reductase"
          /protein_id="Prokka:FAFJHLOP_00002"
          /translation="MSDTYMIYAPNGRGVEVDKKTKEIYFAQSVDPVGKYTKKEYTKVF
FKAWDIMENSPYKDYQPIYLDPNFYTGQKSTLVEFKDWQSIYLKEPIKGSIAPIWTKAE
KAYYKSLKTKRERYKYLIIRSGIRSTVIDIPYEAYCNVDEKGNLINKDYKELYKEVEA
NRGMANMHKGWLFMAEWELAAGILGDIKGFVQALQLSMTGFKARTQAINFLLIQLGHE
QGFKSLYDSYAYRDLTDGIHKNSLKAQMLKDFAKNPPYDEFGLPFLDELIGVDWVID
VNKYQFAYDEKGRVNDALKDDVEKGILKDPRIDSTPESRWEFDKEMDAYKNGMRTRF
DGDNPNHWSKEQVERFNDTLILCAKLAALTPPQGYPNAPYYSPERLEFIYKHKHLDR
LEDPRIPAIYRYNFPRELRAKILKFGEENGIKD"

```

ORIGIN

```

1  atatttatat ctttctcttt tagtttttaa agatttataa taagcttttt ctgcttttagt
61  ccaaggagct atacttcctt tgatagggtc ttttaaatat atactttgcc aatcctttaa
121 ttctactaga gtggattttt gccctgtata aaagtttagga tctaaatatac ttggttcata
181 atctttgtag ggggagtttt ccatgatctt ccaagctttg aagagggcct tggaaatggtg
241 ctcaacatac ttatctacag gcttattaat tgtatcgcca attaataattt tatttgtgtc
301 tttttctaca tttaataataa gtccatttgg tgtataaatc tcataagttt cactcatctt
361 ttgtcctttt atctttaatt tatcctatat gtaaaccatt tttcatgatt atagtgggtg
421 ctagtctgcc tatgaaatta ctttaactct taatgccatt ttcttcgcca aatttttagta
481 tcttagctct aagttccctt gggaaattat atctataaat agcagggatt cttggatcaa
541 ggagtttatc aagcttatgt tttttgtaa catattctaa atgttctgga acccaataat
601 aaggtgcatt aggatagcct tgtggaggag ttaagactgc tagtttagat tctaaaataa
661 gagaatctat atatagtttc gcttcttgat tagtccaatc attgggaata tccgtattgt
721 aaaatgcaac agaacctcta cgatatgcc acatttcacg attaaactct cttctactct
781 ctggagtaga gtctatatct cttggatctt ttaatttacc ttttaaaaca tcatcatcta
841 aagatctaata agctttacca tcagcatcat ctgcaaattc atattctggt aaatcaatca
901 cccaatccac ccccataagc tcataaaga aaggtagcat tccaaattca tcataaggag
961 gatttttaga aaagtctttt agcatttgag ctttaagagg gtttttatgt ataccatctg
1021 ttaaacctct atatgcataa gaatcataaa gactttttaa accttgttca tgtcctagtt
1081 gtatgagtaa aaaatttact gcttgggttc ttgctttaa tcctgtcata gaaagttgta
1141 aggctcctat aaatcctttt atatctccta gtatccctgc tgctaattcc cattcaccca
1201 taaataaata tccatcactt aaatgagcta agcctctatt agcttctact tctttgtaa
1261 gttctttata atcttcattg attaaatttc cttttcatc tacattagca taagcatcat
1321 aggttatatc tataacagtg cttcttatac cacttctaata cactagatat ttatatcttt
1381 ctcttttagt ttttaaagat ttataataag cttttctgc ttttagtcaa ggagctatac
1441 ttctttgat aggttctttt aatatatac tttgccaatc tttaaattct actagagtgg
1501 atttttgcc tgtataaaag ttaggatcta aatatcttgg ttcataatct ttgtaggggg
1561 agttttccat gatttccaa gctttgaaga gggctttgga atattctttg gtatattttc
1621 ctgtgggttt ggaactttga tcaaaatata tttcattagt tttttatta acatctaata
1681 tggaaccatg tgggtgataa atctcataag tatcactcat cttttatcct ttctttaatt
1741 aacctatatg caaacctttt ttcataatga tagtagtggc ttgtaattac tttaatcttt
1801 aatgccattt tcttcgcaa atttgagtat cttagctcta agttcccttg gaaattata

```

```

1861 tctataaata gcagggattc ttggatcttc taatctatca agcttgtggt ttttgtaa
1921 aaattcta ctttcaggag agtaataata aggggcatta ggatagcctt gagggggagt
1981 tagggctgcg agtttggcac ataaaatcaa agtatacatta aatctctcta cttgctcttt
2041 actccaatga tttggattat ctccatcaaa tctagttctc attccattct tataagcatc
2101 catctctttg tcaaaactccc acctactctc tggagtagaa tctatatctc ttggatcttt
2161 gagtattcct ttttcaacat catcttttag agcatcatta actcttcctt tttcatcata
2221 ggcaaattga tatttattca catctatcac ccaatccact cctataagtt catctagaaa
2281 aggtagcata ccaaattcat cataaggagg attttttagca aagtctttta gcatttgagc
2341 ttttaagagag tttttgtgta tgccatctgt taaatctcta tatgcataag aatcataaag
2401 acttttaaaa cttgtttcat gtcctagttg tatgagtaaa aaatttattg cttgagttct
2461 tgctttaaat cctgtcatgg aaagttgtaa ggctcctaca aatcctttta tatctcctag
2521 tattcctgct gctaattccc attcagccat aaagagccaa cttttatgca tattagccat
2581 acctctattg gcttctactt ctttatagag ttctttatag tctttattga ttaaatttcc
2641 tttttcatct acattacaat atgcttcata aggtatatct ataacagtgc ttcttatacc
2701 acttcttata attaaatatt tataatctttc tcttttagtt tttaaagatt tataataagc
2761 tttttctgct ttagtccaag gagctatact tcctttgata ggttctttta aatatatact
2821 ttgccaatct ttaaattcta ctagagtgga tttttgccct gtataaaagt taggatctag
2881 atatatgggt tgatagtctt ttaggggga gttttccata atatcccaag ctttaaaaaa
2941 aaccttagtg tattctttag tatatttacc tacaggatca acgctttgtg caaaatatat
3001 ttcttttggt tttttatcta cctctacccc tcttccattg ggagcgata tcatataagt
3061 atcactcatc ttttatcctt tcttaattta tcctatatgt aagccatttt tcatgattat
3121 agtgggtggc agtctgccta tgaggttact ttaatcttta atgctatttt cttcgccaaa
3181 ttttagtata ttagctctaa gttcccttgg gaaattatat ctataaatag

```

//

LOCUS FAFJHLOP\_2 1016 bp DNA linear 12-APR-2021

DEFINITION Campylobacter species strain strain.

ACCESSION

VERSION

KEYWORDS .

SOURCE Campylobacter species

ORGANISM Campylobacter species

Unclassified.

COMMENT Annotated using prokka 1.14.6 from  
<https://github.com/tseemann/prokka>.

FEATURES Location/Qualifiers

source 1..1016

/organism="Campylobacter species"

/mol\_type="genomic DNA"

/strain="strain"

gene complement(447..944)

/gene="trxB\_3"

/locus\_tag="FAFJHLOP\_00003"

CDS complement(447..944)

/gene="trxB\_3"

/locus\_tag="FAFJHLOP\_00003"

/inference="ab initio prediction:Prodigal:002006"

/inference="similar to AA sequence:RefSeq:CKG87041.1"

/codon\_start=1

/transl\_table=11

/product="thioredoxin reductase"

/protein\_id="Prokka:FAFJHLOP\_00003"

/translation="MLPFIDEIMGVDWVIDLNRYKFALDEEGRIIWALYDDIEKGLK

DPRDVDSTPESRKEFDHYMDGYKNGMVTRFDVDIRNERDERSAKLTMDTLVLSAKLAA

LTPPQGYPNAPRYYSERLEIIYKRHKLDKLLDPRIPAIYRYNFPRELRAKILKFAEE

NGIKD"

ORIGIN

```

1 cacttcttat aattaaatat ttatatcttt ctcttttggg ttttaaagat ttataataag
61 ctttttctgc tttagtccaa ggagctatgc ttcctttaat gggatctttt aaatatatgc
121 tttgccattc tttaaattca agtaaagtag aagcttgccc tgtataaaag ttaggatcta
181 gatataattg tttatagtct ttgtaggggg agtttcttaa tatgcggtca ccttcgaaga
241 gagctttgga atggtggttg gtgtatgtac cattgctttt tgccgtaaat aatattttgt
301 ttgtatcttt ttctacattt aatattgaac catctggtgt ataaatctca taagtttcgc
361 tcattattta tcctttctta aatttatccc atgtataaac catcttctat gattatagta
421 gtggctagtc tacctatgca attactttaa tctttaatgc cttttcttc agcaaatttt
481 agtatcttag ctctaagttc ccttgggaaa ttatatctat aaatagcagg gattcttgga
541 tcaaggagtt tatcaagctt atgtctttta taaataattt ctagtctttc agggctatag
601 tatcttggag cattaggata gccttgtgga ggagtggagg ctgcgagttt ggcacttaat
661 actagggtat ccatagtcag ttttagcagat ctctcatctc tttcgtttct aatatctaca
721 tcaaacttag ttaccattcc atttttatat ccatccatat aatgatcaaa ttctttcctg
781 ctttcaggag tagaatccac atctcttggga tcttttaatt tacctttttc aatatcatca
841 tataaagccc aatgattct accttcttca tcaagagcaa atttatatcg atttaaatca
901 atcacccaat ctactccat aatctcatct ataaaaggta gcataccaaa ttcacaggc
961 tgtatagttt tagctaaatc ttttactaat ttagccctta aaggattttt atgtat

```

//

LOCUS FAFJHLOP\_3 958 bp DNA linear 12-APR-2021

DEFINITION Campylobacter species strain strain.

ACCESSION

VERSION

KEYWORDS .

SOURCE Campylobacter species

ORGANISM Campylobacter species

Unclassified.

COMMENT Annotated using prokka 1.14.6 from  
<https://github.com/tseemann/prokka>.

FEATURES

source

Location/Qualifiers

1..958

/organism="Campylobacter species"

/mol\_type="genomic DNA"

/strain="strain"

gene

complement(383..952)

/gene="trxB\_4"

/locus\_tag="FAFJHLOP\_00004"

CDS

complement(383..952)

/gene="trxB\_4"

/locus\_tag="FAFJHLOP\_00004"

/inference="ab initio prediction:Prodigal:002006"

/inference="similar to AA sequence:RefSeq:CKG86288.1"

/codon\_start=1

/transl\_table=11

/product="thioredoxin reductase"

/protein\_id="Prokka:FAFJHLOP\_00004"

/translation="MHKNPLREQQIKTLAKTLKPDEFGLMPFIDEIMGVDWVIDLNKY  
DIASDQFGSMYKALRSDVVEGKIKDPRIDISTYESRREFDRHRGGYKNGMLQGYGTD  
PNDWSEERAQLFNDTLILHAKLAALTPPQGYPNAPYYFTPENLEWYYKRHKLDKLLDP  
RIPAIYRYNFPRELRAKILKFGENGINE"

ORIGIN

```

1 ctttagtcca aggagctatg cttcctttaa tgggatcttt taaatatatg ctttgccaat
61 ctttaaattc aagcaaagtg gatttttgcc ctgtgtgaaa ttcaggatct agatacctag

```

```

121 gttgatagtc tttgtagggg gagttttggt tgatattgtg tgcttcaaaa agggctctag
181 aatattcttg ggtgtatttg cctaccttag ctccccatc acttaataaa attttattcg
241 tttctttttc tacttctaata ataacacatc taggcatata aatttcataa gtttcactca
301 tcttttatcc tttcttaatt tatcccatat ataaaccatc ttccatgatt atagtagtgg
361 ctaatctgcc taggtaatta ctttattctt taatgccatt ttcttcacca aatttgagta
421 tcttagctct aagttccctt gggaaattat atctataaat agcaggggatt cttggatcaa
481 ggagtttatc aagcttatgt cttttataat accattctag gttttcaggg gtaaaataat
541 aaggtgcatt aggatagcct tgaggaggag tgagggctgc tagtttgga tgaagtatta
601 aagtatcatt aaaaagttgc gccctttctt cgctccaatc attgggtgta tcggttccat
661 agccttgag catgccattt ttatatccac ctctatggcg atcaaattcc cttctgcttt
721 cataagtaga atctatatcc cttggatctt ttatcttgcc ctcaaccaca tcaattctta
781 aggctttata catacttcca aattgatcac tagctatata atatttattt aaatcaatca
841 cccaatctac tcccataatc tcatctataa aaggaagcat accaaattca tcagggtttta
901 aagtcttagc taagggtttta atttgttgct ctcttaaagg atttttatgc actcctac

```

//

LOCUS FAFJHLOP\_4 874 bp DNA linear 12-APR-2021

DEFINITION Campylobacter species strain strain.

ACCESSION

VERSION

KEYWORDS .

SOURCE Campylobacter species

ORGANISM Campylobacter species  
Unclassified.

COMMENT Annotated using prokka 1.14.6 from  
<https://github.com/tseemann/prokka>.

FEATURES

Location/Qualifiers

source 1..874  
/organism="Campylobacter species"  
/mol\_type="genomic DNA"  
/strain="strain"

gene 7..570  
/gene="trxB\_5"  
/locus\_tag="FAFJHLOP\_00005"

CDS 7..570  
/gene="trxB\_5"  
/locus\_tag="FAFJHLOP\_00005"  
/inference="ab initio prediction:Prodigal:002006"  
/inference="similar to AA sequence:RefSeq:CKG86288.1"  
/codon\_start=1  
/transl\_table=11  
/product="thioredoxin reductase"  
/protein\_id="Prokka:FAFJHLOP\_00005"  
/translation="MHKNPLREQQIKTLAKTLKPDEFGLPFIDEIMGVDWVIDYNEY  
QISEDEFDGIYKALRSDVVEGKIKDPRDIDSTYESRREFDYMDGYSNGMINAYGYDI  
PNDWDAQLKIDSMILTAKLAALTPPQGYPNAPYYFTPEKLEWYYKRHKLDKLLDPRI  
PAIYRYNFPRELRAKILKFGEENGIKE"

ORIGIN

```

1 gtaggagtgc ataaaaatcc ttttaagagag caacaaatta aaaccttagc taagacttta
61 aaacctgatg aatttggtat gcttcctttt atagatgaga ttatgggagt agattgggtg
121 attgattata acgaatatca aatttctgaa gatgaatttg gggatatata taaagcctta
181 agaagtgatg tagttgaggg caagataaaa gatccaaggg atatagattc tacttatgaa
241 agtagaaggg agtttgatta ttatatggat ggttattcta atggcatgat taatgcctat
301 ggttatgata ttccaaatga ttggaatgat gcgcaattaa aaatagattc tatgatatta
361 actgccaac tcgcagccct cactcctcca caaggttatc ctaatgcacc ttattatatt

```



```
421 acccctgaaa aactagaatg gtattataaa agacataagc ttgataaact ctttgatcca
481 agaatccctg ctatttatag atataatttc ccaagggaac ttagagctaa gatactcaaa
541 tttggcgaag aaaatggcat taaagaataa agtaattaca taggcagatt agccactact
601 ataatcatgg aagatggttt atatatggga taaattaaga aaggataaaa gatgagttaa
661 acctatgaaa tttatacacc taatgggtatt attttagatg tagaaaaaga aacgaataaa
721 attttattaa gtgatggggg agctaaggta ggcaaataca cccaagaata ttctaaagct
781 ttgtttgaag ccgatagaat tttagaacc tctccttata ttaattatca acctaggtat
841 ctagatcctg aatttcacac agggcaaaaa tcca
```

//

LOCUS FAFJHLOP\_5 702 bp DNA linear 12-APR-2021

DEFINITION Campylobacter species strain strain.

ACCESSION

VERSION

KEYWORDS .

SOURCE Campylobacter species

ORGANISM Campylobacter species  
Unclassified.

COMMENT Annotated using prokka 1.14.6 from  
<https://github.com/tseemann/prokka>.

FEATURES Location/Qualifiers  
source 1..702  
/organism="Campylobacter species"  
/mol\_type="genomic DNA"  
/strain="strain"

ORIGIN

```
1 tataggcgta ttcttcattg attaaatatt ctttttcatt tacattacaa taagcatcat
61 aaggatattc tataacagtg cttcttatac cacttctaact cactagatat ttatatcttt
121 ctcttttggt ttttaaagat ttataataag ctttttctgc ttttagtcaa ggagctatag
181 ctcttttgat aggatctttt aaataaatgt tttgccattc tttaaattct actagagtgg
241 atttttgccc tgtataaaag ttaggatcta gatataattg tttatagtct ttgtaggggg
301 agtttttcat aatataataa gattcaaaaa ccgctttgga atattcttcg gtataattgc
361 ctgtggggtt aatattttct ttaaataagta ttttattggt atctttttcc acatctaatt
421 ttaatccatt gggtgtataa atctcataag tttcgctcat tttttatcct ttcttaattt
481 aacctatata taaaccatct tctatgatta tagtagtggc tagtctacct atgcaattac
541 tttattcttt aatgccattt tcttcgcaa atttgagtat cttagctcta agttcccttg
601 ggaaattata tctataaata gcagggattc ttggatcaag gagtttatct aaatatcctc
661 ttttataaat ccattccaat ctttcaggtg taaaataata ag
```

//

LOCUS FAFJHLOP\_6 664 bp DNA linear 12-APR-2021

DEFINITION Campylobacter species strain strain.

ACCESSION

VERSION

KEYWORDS .

SOURCE Campylobacter species

ORGANISM Campylobacter species  
Unclassified.

COMMENT Annotated using prokka 1.14.6 from  
<https://github.com/tseemann/prokka>.

FEATURES Location/Qualifiers  
source 1..664  
/organism="Campylobacter species"  
/mol\_type="genomic DNA"  
/strain="strain"

ORIGIN

```

1 aatcaatcac ccaatctact cccataatct catctataaa aggaagcata ccaaattcat
61 caggttttta agtcttagct aaggttttta tttgttgctc tcttaaagga tttttatgca
121 ctctactaa accacttctt actgcaatat ctgcataacc ataaatagca cccaataaat
181 taggtttatc tagtatacta cttcctccac ttaattgtat ataaagtata gttgcttgga
241 taaatcttgc attaaaacca ttttgagaca tatcgttagc tagatattta taatcaccca
301 gtattcctgc tgccataccc cattcattat gaaataaact tgatcttaga ttatgtttat
361 tatcatctac tgttctatat aattcttcat acttaggac tacatttctt ttttcatcta
421 cagctcctat ggcttcataa ggtatatcta taacaacact tcttatacca cttcttataa
481 ctatagatatt atatctttct cttttgggtt ttaaagattt ataataagct ttttctgctt
541 tagtccaagg agctatgctt ctttaaatgg gatcttttaa atatatgctt tgccaatctt
601 taaattcaag caaagtggat ttttgcctg tgtgaaattc aggatctaga tacctaggtt
661 gata

```

//

LOCUS FAFJHLOP\_7 634 bp DNA linear 12-APR-2021

DEFINITION Campylobacter species strain strain.

ACCESSION

VERSION

KEYWORDS .

SOURCE Campylobacter species

ORGANISM Campylobacter species  
Unclassified.

COMMENT Annotated using prokka 1.14.6 from  
<https://github.com/tseemann/prokka>.

FEATURES Location/Qualifiers  
source 1..634  
/organism="Campylobacter species"  
/mol\_type="genomic DNA"  
/strain="strain"

ORIGIN

```

1 gaactttcta ataatccttt ttactttgga gaattagatc aagataatct tataaaacaa
61 gatataccca gttattatth ttctcctaaa gatgaaagca gtggtttagg aagacttagt
121 atcttttata aaaacgatga actttgcttg cttattatt ctatattaga aaattcttta
181 aatatcaaat tagaatgctt aagcaagcaa agcttagaat acaaagattt aatttcaaac
241 actctaaaag acaaaaaaac cacacaagta gataaaaaac aaagcatagc taaacttcac
301 gctcttttag aaaatcaaaa cctagaatgt atccatggag gtaaagtcac acttaaatca
361 acaaaggaa aatcctttta aagtgatggt atccctataa tgctagaaag tgatttatta
421 aactctagta tagtagcttg tcctcacacc atagcaaagtg taagttatcc ttgtactaaa
481 gtcgttaatg taaaaggctc cttatctcaa aagaaagtaa ataataagatt tgtaacttta
541 caagaactca tctcagcttg cactacagat aaaggctttg ctttaaaagt aagctttact
601 ccaagtaagt ttaaatttga tcacagcttt gatc

```

//

LOCUS FAFJHLOP\_8 607 bp DNA linear 12-APR-2021

DEFINITION Campylobacter species strain strain.

ACCESSION

VERSION

KEYWORDS .

SOURCE Campylobacter species

ORGANISM Campylobacter species  
Unclassified.

COMMENT Annotated using prokka 1.14.6 from  
<https://github.com/tseemann/prokka>.

FEATURES Location/Qualifiers  
source 1..607  
/organism="Campylobacter species"

```

        /mol_type="genomic DNA"
        /strain="strain"
gene     complement(209..385)
        /locus_tag="FAFJHLOP_00006"
CDS      complement(209..385)
        /locus_tag="FAFJHLOP_00006"
        /inference="ab initio prediction:Prodigal:002006"
        /codon_start=1
        /transl_table=11
        /product="hypothetical protein"
        /protein_id="Prokka:FAFJHLOP_00006"
        /translation="MSKKFIA*VLALNPVMESCKAPINPFISPSIPAANSHSAIKSQP
LCILAIPLLASTSL"

```

ORIGIN

```

1  tatatttaa agatcctatc aaaggagcta tagctccttg gactaaagca gaaaaagctt
61 attataaatc tttaaaaact aaaagagaaa gatataaata ttttaattata agaagtggac
121 ttagaagcac tgttatagat ataccttatg atgcttattg taatgtagat gaaaaaggaa
181 atttaaatcaa taaagactat aaagaacttt acaaagaagt agaagctaag agaggatg
241 ctaatatgca taaaggttgg ctctttatgg ctgaatggga attagcagca ggaatactag
301 gagatataaa aggatttata ggagccttac aactttccat gacaggattt aaagcaagaa
361 ctcaagcaat aaatTTTTTTA ctcatacaac taggacatga acaaggTTTTT aaaagtcttt
421 atgattctta tgcatataga ggtttaacag atggtataga caaaaactct cttaaagctc
481 aaatgctaaa agactttgct aaaaatcctc cttatgatga atttggaatg ctacctttct
541 tagatgagct tataggagtg gattgggtga ttgattttaa tgaatatcaa tttgcttatg
601 atggtga

```

//

LOCUS FAFJHLOP\_9 592 bp DNA linear 12-APR-2021

DEFINITION Campylobacter species strain strain.

ACCESSION

VERSION

KEYWORDS .

SOURCE Campylobacter species

ORGANISM Campylobacter species

Unclassified.

COMMENT Annotated using prokka 1.14.6 from  
<https://github.com/tseemann/prokka>.

FEATURES Location/Qualifiers

```

source      1..592
            /organism="Campylobacter species"
            /mol_type="genomic DNA"
            /strain="strain"
gene        complement(48..590)
            /gene="trxB_6"
            /locus_tag="FAFJHLOP_00007"
CDS         complement(48..590)
            /gene="trxB_6"
            /locus_tag="FAFJHLOP_00007"
            /inference="ab initio prediction:Prodigal:002006"
            /inference="similar to AA sequence:RefSeq:CKG86288.1"
            /codon_start=1
            /transl_table=11
            /product="thioredoxin reductase"
            /protein_id="Prokka:FAFJHLOP_00007"
            /translation="MLKDFAKNPPYDEFGMLPFLDELIGVDWIDLNEYQFAYDGDGG

```

SVKALDEKVRQGKLDPRDSDSTPESRKEFDEEANAYTFGNRMNFSSDIRDSRSKESA  
RLFDDLLILHAKLAALTPPQGYPNAPYYFSPEQLEDFYKRQVLDKLDPRIPAIYRYN  
FPRELRAKILKFGREENSIKD"

ORIGIN

```
1 ccatttttca tgattatagt ggtggctagt ctgcctatga ggttacttta atctttaatg
61 ctattttctt cgccaaattt tagtatctta gctctaagtt cccttgggaa attatatcta
121 taaatagcag ggattccttg atcaagttaa gcgtctaaaa cttgtctttt gtaaaaatct
181 tctaattggt caggactaaa ataataaggt gcattaggat agccttgagg aggagtgagg
241 gctgcgagtt tggcatgaag tatcaaaagg tcatcaaata atctagccga ttctttactt
301 ctactatcgc gaatatcaga ggaaaaattc attctattac caaaagtata agcattagct
361 tcttcatcga attctttcct gctctctgga gtagaatcta catctcttgg atcttttaat
421 ttaccttgtc ttactttctc atctaaagcc ttaacactac cgccatcacc atcataagca
481 aattgatatt cattcaaac aatcaccaa tccactccta taagctcatc taagaaaggt
541 agcattcaa attcatcata aggaggattt ttagcaaagt cttttagcat tt
```

//

LOCUS FAFJHLOP\_10 554 bp DNA linear 12-APR-2021

DEFINITION Campylobacter species strain strain.

ACCESSION

VERSION

KEYWORDS .

SOURCE Campylobacter species

ORGANISM Campylobacter species  
Unclassified.

COMMENT Annotated using prokka 1.14.6 from  
<https://github.com/tseemann/prokka>.

FEATURES

Location/Qualifiers  
source 1..554  
/organism="Campylobacter species"  
/mol\_type="genomic DNA"  
/strain="strain"

ORIGIN

```
1 taaaaatcct ttaagagagc aacaaattaa aaccttagct aagactttta aacctgatga
61 atttggtagt cttcctttta tagatgagat tatgggagta gattgggtga ttgatttaaa
121 taaatataga ttagctaatg atgaatttgg aaaaatatac aaagccttaa gaagtgatgt
181 agttgagggc aagataaaag atccaaggga tatagattct acttatgaaa gcagaaggga
241 gtttgatcgt tatagagttg gatatagaaa gggtagggcg caaggctatg gaaccgatac
301 acccaatgat tggagcgaag aagaagcaca actttttaat gatactttta tacttcatgc
361 caaactcgca gccctcactc ctcctcaagg ctatcctaata gcaccttatt attttaccac
421 tgaaaatcta gaatggtatt ataaaagaca taagcttgat aaactccttg atccaagaat
481 ccctgctatt tatagatata atttccaag ggaacttaga gctaagatac tcaaatgtg
541 cgaagaaaat ggca
```

//

LOCUS FAFJHLOP\_11 535 bp DNA linear 12-APR-2021

DEFINITION Campylobacter species strain strain.

ACCESSION

VERSION

KEYWORDS .

SOURCE Campylobacter species

ORGANISM Campylobacter species  
Unclassified.

COMMENT Annotated using prokka 1.14.6 from  
<https://github.com/tseemann/prokka>.

FEATURES

Location/Qualifiers  
source 1..535

```
/organism="Campylobacter species"  
/mol_type="genomic DNA"  
/strain="strain"
```

ORIGIN

```
1 atacataaaa atcctttaag ggctaaatta gtaaaagatt tagctaaaac tatacagcct  
61 gatgaatttg gtatgctacc ttttatagat gagattatgg gagtagattg ggtgattgat  
121 ttaaatacagt atcaatttgc gtatgacggt aaaggtgatt ctacttgggc tttatatgat  
181 gatattgaaa aaggtaaatt aaaagatcca agagatgtgg attctactcc tgaaagcagg  
241 aaagaatttg atgaagaaac tgacgtttat agatttggtg acagaatgaa ttttgctct  
301 gatattcgtg atagtagaag tgaagaatca actagattat ttgatgatac ttttaatactt  
361 catgccaaac tcgcagccct cactcctcca caaggctatc ctaatgcccc ttattatatt  
421 acacctgaaa gattggaatg gatttataaa agaggatatt tagataaact ctttgatcca  
481 agaatccctg ctatttatag atataatttc ccaagggaac ttagagctaa gatac
```

//

>>BfR-CA-15831\_min\_cov\_30 putative plasmid location

LOCUS EDCPFOPP\_1 2138 bp DNA linear 12-APR-2021

DEFINITION Campylobacter species strain strain.

ACCESSION

VERSION

KEYWORDS .

SOURCE Campylobacter species

ORGANISM Campylobacter species  
Unclassified.

COMMENT Annotated using prokka 1.14.6 from  
<https://github.com/tseemann/prokka>.

FEATURES

Location/Qualifiers

source

1..2138

/organism="Campylobacter species"

/mol\_type="genomic DNA"

/strain="strain"

gene

345..647

/locus\_tag="EDCPFOPP\_00001"

CDS

345..647

/locus\_tag="EDCPFOPP\_00001"

/inference="ab initio prediction:Prodigal:002006"

/codon\_start=1

/transl\_table=11

/product="hypothetical protein"

/protein\_id="Prokka:EDCPFOPP\_00001"

/translation="MILCIFSSNFSSKYFSLASCFNSSSSSPKIKSLKKPATSVPTT  
APTTVPTIGKLEPTAAPVAAPAAIRESMDTPALAAILDATLELAILVAALEATLLV"

gene

714..932

/locus\_tag="EDCPFOPP\_00002"

CDS

714..932

/locus\_tag="EDCPFOPP\_00002"

/inference="ab initio prediction:Prodigal:002006"

/codon\_start=1

/transl\_table=11

/product="hypothetical protein"

/protein\_id="Prokka:EDCPFOPP\_00002"

/translation="MIIVILTPTLVSVKALTLDFPSALARKKFNIPKFIILECIILA  
ICELSSMPNFTISFSKALVAKPSVMPKA"

gene

complement(1026..1664)

```

CDS      /locus_tag="EDCPFOPP_00003"
         complement(1026..1664)
         /locus_tag="EDCPFOPP_00003"
         /inference="ab initio prediction:Prodigal:002006"
         /codon_start=1
         /transl_table=11
         /product="hypothetical protein"
         /protein_id="Prokka:EDCPFOPP_00003"
         /translation="MSEINNTEIKEQDTQDEIIWEGKKHIPSFLLFWITYIVLLCFA
LYLFPRLFNPSKEIDYKWFIVFFTFLLVIYALAQKIYRMANIKRIYITKEKLVIEYYI
KNDLVFPLGTFVYYRRLSFVLTPGHIVIYTFGDKVKEYLEPGLFSDGDDPTKDCFER
INAIKPHVMPYLLSLSDEEFEKIIFHVSGFSEIDTTFLEAMELRKEKKDE"
gene     complement(1715..2107)
         /locus_tag="EDCPFOPP_00004"
CDS      complement(1715..2107)
         /locus_tag="EDCPFOPP_00004"
         /inference="ab initio prediction:Prodigal:002006"
         /codon_start=1
         /transl_table=11
         /product="hypothetical protein"
         /protein_id="Prokka:EDCPFOPP_00004"
         /translation="MANIKRIYITKEKLVIEYYIKNDLVFPLGTFVYYRKISYSLSP
GHIVIYTFGDKVKEYLEPSLFSDDPTKGCFERINAIKPHVMPYLLSLSDEEFEKI
FFHVNATSKIDTTFLEAMELRKEKKDE"

```

ORIGIN

```

1  attcatcctc atctgcttca tcataaggta tgccagtatc ttcttcaaaa gcaacttcat
61  agttttctgg atctaaatta tcatcgcac cttccataaa atcatctata taatntttta
121 ctgccttatt agctatgggt tgtattctga ttatagttgg attttttctc tgagcttctt
181 tataactttg ctcatcttta tctaaataat aaggaaaact tagcatcaaa agaatggttt
241 taaaataagc actattaata tcacttattt ctttacaag cttttctgct tcatcttcat
301 ttaacactct taattctata tactgatgag tgatgagata attgatgatt ttatgcattt
361 tttcatctaa tttttctctt aaatattttt ctttggcttc ttgttttttt aattcctcat
421 cttcatcgcc aaaaattaag tcattaataa aacctgctac aagtgttccc accactgcac
481 ccaccactgt cccaacaata ggaaagctcg agcctacagc tgctccagtt gctgcacctg
541 cggcaatacg agaaagtatg gatacgccag ctctagctgc gatattagat gctactcttg
601 agctagctat cttggttgcg gcattagaag caaccctgct ggtttgagtt aaggtttggt
661 tggcaacatg ttcgctacct ttttctattg ttgctccaat aggagtttca ttcattgatta
721 tagtgatact aacaccaacg cttgtttcag tcaaagctct tacattggat tttccctctg
781 ctttagccag aaaaaaattc aatattccaa aattcattat tatttttagaa tgcatcattc
841 tcgcaatatg cgaattatct tctatgcaa acttcactat ttctttttca aaagctttag
901 tagcaaaacc ttctgtaatg cctaaggcat aaggagcaac atctccaaat actcctaaat
961 cccttttatc actaggagtg ctttgagttt cttttagaata aaactctaaa cttccataaa
1021 tattttcatt catctttttt ctcttttctg agttccattg cttctttaag gaaagtagta
1081 tcaatttcgc taaaaccgct tacatggaaa atgatttttt caaattcttc atcacttaag
1141 cttaataaat aaggcattac atgaggtttt ataatggcat taattctttc aaaacaatct
1201 tttgttggat catcgccatc actgaataaa ccaggttcaa ggtattcttt gactttatct
1261 ccgaaggtgt atatcactat atgtcctgga gtaagcacia atgacaggcg acgataatac
1321 acaaaaaaag ttcctaaagg aaaaaccaa tcatTTTTga tataatactc aatcacaagt
1381 ttttcttttg tgatataaat tcttttaata tttgccattc tatagatctt ttgtgcaagt
1441 gcatatataa ctaaaagaaa tgtaaaaaaa actataaacc atttataatc tatttctttg
1501 ctaggattaa ataacttagg aaacaaataa agcgcaaaac ataaaagcac aatatatggt
1561 atccaaaaaa gcaaaaacga aggtatatgc ttttttctt cccaaatgat ttcattcttg
1621 gtgtcttgct ctttgatttc tgtgttattg tttatttcac tcatttttat cttttaaata
1681 agttttaatc tcttgatatat aaaataaaat attttcattc atcttttttc tcttttctga

```

```
1741 gttccattgc ttctttaagg aaagtggat caatcttact agtagcgttt acatggaaaa
1801 agatcttttc aaattcttca tcacttaagc ttaataaata aggcattaca tgaggcttta
1861 taatggcatt aattctttca aaacaacctt ttgttggatc atcgccatca ctgaataaac
1921 taggttcaag gtattctttg actttatctc cgaagggtga tatcactata tgccttggag
1981 aaagtgaata tgaattttta cgataatata caaaaaaagt tcctaaagga aaaaccaaat
2041 cttttttgat ataatactca atcacaagtt tttcttttgt gatataaatt cttttaatat
2101 ttgccatttt atagatcgct cgtgcaaatg catatatg
```

//

LOCUS EDCPFOPP\_2 863 bp DNA linear 12-APR-2021

DEFINITION Campylobacter species strain strain.

ACCESSION

VERSION

KEYWORDS .

SOURCE Campylobacter species

ORGANISM Campylobacter species

Unclassified.

COMMENT Annotated using prokka 1.14.6 from  
<https://github.com/tseemann/prokka>.

FEATURES

Location/Qualifiers

source

1..863

/organism="Campylobacter species"

/mol\_type="genomic DNA"

/strain="strain"

gene

complement(125..670)

/gene="tssI1"

/locus\_tag="EDCPFOPP\_00005"

CDS

complement(125..670)

/gene="tssI1"

/locus\_tag="EDCPFOPP\_00005"

/inference="ab initio prediction:Prodigal:002006"

/inference="similar to AA sequence:RefSeq:A0H52008.1"

/codon\_start=1

/transl\_table=11

/product="type VI secretion system, secreted protein"

/protein\_id="Prokka:EDCPFOPP\_00005"

/translation="MGGEYLTNVGLSKDTIVGLSNTLNVGVNDKVKRIAKNSHEFVGEN

KDIEIGANQNTIIHKDEIRNVKGENKLLIEKSLTQTIEKEFFLNHVQNLSAHIQDNTS

LKSNSMQTKIEEQYSLESENSTDFDQDCGVKAGNQILHQVGDQTIVTKKDCVVIKAG

GVEVIIDSNGLVVKGGEVKAE"

ORIGIN

```
1 caatatatgt tatccaaaa agcaaaaacg aaggatatg cttttttcct tcccaaatga
61 tttcatcttg ggtgtcttgc tctttgattt ctgtgttatt gtttatttca ctcattttta
121 tcctttactc tgccttaacc tctccacctt taaccacaag tccattagag tctataatca
181 cttctactcc acctgcttta attataacac aatctttctt ggtaacaatt tgagtatcac
241 ctacttgatg gaggatttga ttgcctgctt ttactccaca atctgtttga aagtcaaaag
301 tagaattttc tgattctaaa gaatattgct cttctatctt tgtttgcatg gaattagact
361 ttaaagatgt gttatcttgt atatgggctg ataaattttg atgaacatta aggaaaaatt
421 ctttttctat tgtttgggtt aaagattttt ctattaataa tttattttct cccttcacat
481 tccttatctc atctttatgg ataatagtat tttgatttgc acctatttct atatctttgt
541 tttctcctac aaactcatga gagtttttag ctattcttac tttattatct actcctacat
601 ttaaagtatt gcttaatcct actatagtggt ctttagataa acctacatta gttaagtatt
661 ctctcccac attgacattt ttagctaagt ctatggtttg agtatgaacc tttttaatcc
721 tttcattata aattccatct accctagaat ctttatcatt taaaattctt tgagtgaaat
781 tatgctggac taattcatca taatcctttt gggcttttaa ataaatttgt tctttatctt
```

841 ttatatttga gagggtaagt tca

//

>>BfR-CA-15837\_min\_cov\_30 putative plasmid location

LOCUS FDNNOFDK\_1 3982 bp DNA linear 12-APR-2021  
DEFINITION Campylobacter species strain strain.  
ACCESSION  
VERSION  
KEYWORDS .  
SOURCE Campylobacter species  
ORGANISM Campylobacter species  
Unclassified.  
COMMENT Annotated using prokka 1.14.6 from  
<https://github.com/tseemann/prokka>.  
FEATURES Location/Qualifiers  
source 1..3982  
/organism="Campylobacter species"  
/mol\_type="genomic DNA"  
/strain="strain"  
gene 49..1071  
/locus\_tag="FDNNOFDK\_00001"  
CDS 49..1071  
/locus\_tag="FDNNOFDK\_00001"  
/inference="ab initio prediction:Prodigal:002006"  
/inference="similar to AA sequence:RefSeq:APB38683.1"  
/codon\_start=1  
/transl\_table=11  
/product="replication initiation protein"  
/protein\_id="Prokka:FDNNOFDK\_00001"  
/translation="MSDIVKYHNDFNKIQLPSFTEIEQDLLCGLMVKLKEEKGVTFY  
PWDLRNILKSSYDNNSLMEFASSLKRKFFKADFTIIEKTTRGEKEVEAHKTINLFTEF  
AIYVYASSKDLESIEIQVNPQFEYILNQLTANFTAFELSEFIALSGKYTKTLRLLKQ  
YRTTGKARFEWEEFCRVMDIPQDYRQSAIDKWILKPAIKELSKERNLFDQVRVPFKNL  
AYEKEKAKGSRGRGGKVSIGITFTFKPENIEMQKLENESQKIMSDEQYKILNMMKLN  
QVRFVYNDKLWQFNDFDNFNEFKIIAVELQRDEYENLNFNGNHMHFNAKNQEQFFKMIET  
FRKGIR"  
gene 1101..1475  
/locus\_tag="FDNNOFDK\_00002"  
CDS 1101..1475  
/locus\_tag="FDNNOFDK\_00002"  
/inference="ab initio prediction:Prodigal:002006"  
/codon\_start=1  
/transl\_table=11  
/product="hypothetical protein"  
/protein\_id="Prokka:FDNNOFDK\_00002"  
/translation="MTMQIIQDQIPQELSGRMTKQSLERLANHLHIATQNEMGDIPLW  
LLWDLAITCKQLDLKENYQKVLIEIQMNLETQHKANLAEQRADLAEQRAEKAEQRAEK  
AEQLYQQIKNFRISMMKKYQTN"  
gene 1806..1970  
/locus\_tag="FDNNOFDK\_00003"  
CDS 1806..1970  
/locus\_tag="FDNNOFDK\_00003"



```

/inference="ab initio prediction:Prodigal:002006"
/codon_start=1
/transl_table=11
/product="hypothetical protein"
/protein_id="Prokka:FDNNOFDK_00003"
/translation="MDYEKYSKMNLRLINAYTNAEKKEKLLIDDFQKKLDENKNLME
FLKTKIKESL"
gene 1974..3302
/locus_tag="FDNNOFDK_00004"
CDS 1974..3302
/locus_tag="FDNNOFDK_00004"
/inference="ab initio prediction:Prodigal:002006"
/inference="similar to AA sequence:RefSeq:APA51640.1"
/codon_start=1
/transl_table=11
/product="mobilization protein"
/protein_id="Prokka:FDNNOFDK_00004"
/translation="MSYDEIEKVKRSAYTKTASESTKRNYISSGNFKKSTSFQVFHNA
NVRPDYAIGGELVFDLGGYEALELKNKIVSEAKEAYEKNKSPKAPKFKAKSYEWSLVV
NIKPDTSMNLDKNLSKHFQEKYGFQCYQIAIHRDEGHFNQGEKLIHHAHMEFITLD
KETGKNNFRREKISPKVLEIQTIEAIELGMERGEDKRISGAKRIEPRAYAALKEKEK
REKKRNINLEQEQEKEQFLNKSEYKKIIENFRKSQINQGLDKDFKELSELKKNFQEI
KEDNLSELLNDILREHLERIEKLLKENSILKAENELLKQKEQKNDKSIDQEKNASER
NFEPKNDNNTEDKKIFFEKLATYRLNEGLSKIYSKPLKRIVEPETEAKKKERIKILTE
TMEKTEAYLPETLKKWLENNKDIDLKEILVAYQNTLSKELKQSKSIYKGR"

```

ORIGIN

```

1 aggggtagag aagccccttg ccttgattgt cttactttgg atatgcaaat gagcgatata
61 gttaaatacc ataatgattt taataaaatt cagttgccta gttttacaga aatcgaacaa
121 gatttattgt gtggtttaat ggtaaaactt aaagaagaaa aaggcaaagt aacattctat
181 ccttgggact taagaaacat tctcaaaagt agttatgata ataatagtct aatggaattt
241 gcgtccttct taaaaaggaa atttttcaaa gctgacttta caataattga aaaaacaact
301 aggggtgaaa aagaagttga agcacacaaa acaataaacc tttttacaga atttgcaatt
361 tatgtttatg caagctcaaa agatttagag agtatagaaa tacaagttaa tccgcaattt
421 gaatatattt taaatcaact aaccgctaatt ttacagcct ttgaacttag cgaatattt
481 gcccttagcg gtaaatatac taaaactctt tatagacttt taaagcaata cagaactaca
541 ggtaaagcac gatttgagtg ggaagaatth tgcagggtta tggatatacc gcaagattat
601 agacaaagtg caatcgataa atggatttta aaacctgcta taaaagaact ttctaaagaa
661 cgcaatcttt ttgatcaagt gcgagtgctt tttaaaaatc ttgcctatga aaaagaaaaa
721 gcaaaaggaa gtaggggtag gggtggcaag gtttcaggca ttacctttac ttttaaacct
781 gaaaatatcg aaatgcaaaa gctagaaaaat gaaagtcaaa aaataatgag cgatgagcaa
841 aaatatttaa aaattttaa caatatgaaa cttaatcaag tccgcttcgt ttataatgac
901 aagctttggc aatttaacga ttttgatttt aatgaattta aaattattgc agtagagctt
961 caagagatg agtatgagaa tttaaacttt ggaaatcata tgcactttaa tgctaaaaat
1021 caagagcagt tttttaaatt gattgaaacc tttagaaaag gtatcagata agcgaaaaag
1081 acaaaaacag gagaaagaaa atgacaatgc aaataatata agatcaaatt ccacaggaat
1141 tgtcaggagg aatgacaaaa cagagcctag agagattagc aaatcatctt cacatagcga
1201 cccaaaacga aatgggggat attccactat ggctactttg ggacttagcg ataacttgca
1261 aacaattaga tttaaaagag aattatcaga aagtcttaat agaaatacag atgaacctag
1321 aacacagca caaagcaaac ttagcagagc agagagcaga cttagcagag cagagagcag
1381 agaaagcaga gcagagagca gagaaagcgg agcaattata tcagcaataa aagaatttca
1441 gaatatcaat gatgaaaaaa tatcaaaaca attaaataaa gaagaaagca aggaatttaa
1501 tatccccgct ctaagacggg gcaacctatc taaaagataa gctaattctt cgctaaactt
1561 tcatttagga agtcaaataa aattctatca taaataatth tatttaatac ttttacatta
1621 aatgagcttg cgaattaatg caaagccacg cggtgcaaat tattaatcat tttttattt

```



```

gene      /strain="strain"
          23..1219
          /locus_tag="FDNNOFDK_00005"
CDS       23..1219
          /locus_tag="FDNNOFDK_00005"
          /inference="ab initio prediction:Prodigal:002006"
          /inference="similar to AA sequence:RefSeq:EAQ72546.1"
          /codon_start=1
          /transl_table=11
          /product="putative sugar transferase"
          /protein_id="Prokka:FDNNOFDK_00005"
          /translation="MLDPKKLNDTEKINYKNITAEALAWEMNLPLPKYDFIFISSHG
TGEKAFQEMLARCDGVKVLQKNKWYDNGKDRYAFYKDLVIDCTAKKCIPILECNFLY
YGKYLHMFQKVKVPLICLVRDPIKMOVSVYNYKVIKDKQKLFHSNKNNEVMFDNYFYT
TTKSKSIIDLNELKKRIIHQRTITSNMRFTYIAKTHIQNLKNMDKVYYIDSSEISASK
AYLKLKEIGDIVGFSVPEDFNLINKISFTHYLRFIFDIDRPIIYTHQINPDNLQIFI
FHMYQQTERQDITHLNLQYDSSMHNIFICTDTQDYDIIHDEKILYEIRDNLNFF
NKINNHIAILRKEAISEEDILKIYKEDKQTSDAFKKLIIEDEFKDVLEKESMLKKWNHY
LKFIKL"
gene      1243..2631
          /locus_tag="FDNNOFDK_00006"
CDS       1243..2631
          /locus_tag="FDNNOFDK_00006"
          /inference="ab initio prediction:Prodigal:002006"
          /inference="similar to AA sequence:RefSeq:AHY40622.1"
          /codon_start=1
          /transl_table=11
          /product="putative sugar transferase"
          /protein_id="Prokka:FDNNOFDK_00006"
          /translation="MYNIVLASDNNYIKYVGVVLSIIKNTKENDNFANEKYIFHVLT
SDISLNNQQLQTLVDYLSNIYPCELKIHIIIDDSQFHEFPKAWHVNATYYRFEIANI
LGDEVSKCLYIDADVLACDDIREIFHIDLSGKIVGVVTDSCSQLWTKLKSRTDNLNI
NFDPIYYFNAGVIMIDLNKWRQCDIKQKCIQAFLDYDHGGLADQSYLNIALKDSIYKL
PLGWNLIAPEYVLLQGYERHYVQKCLDEGKDYNIAAYTRKEFSQALNEKKIVHFAAKP
WWNLYYKNERVDFNERKIWWDIAINMEGFKEDFRYLRLNLELEYLNRKINSIASNGIK
HVTKIIQVNHNAKSRIQNQLSYKLGQIALINSKILGLLCPVYIISTIIIVHVQDKKI
YHNAIKKDPKLLPLEQYDPDYNEAIKQKQHFQSYKLGSVIMHSLKYWYLGILALPFR
VFKLYKNHKKKI"
ORIGIN

```

```

1 ggaaaacat cttatcctt ctttgcttga tcctaaaaag ttaaataatg atactgaaaa
61 aattaattat aaaaatatta cagcggact tgcctgggaa atgaatttac ctcttcaga
121 taagtatgat tttatattta taagtagtca tggaaactggc gaaaaagctt ttcaagaat
181 gctagcacgt tgtgatggtg taaaagtctt gcaaaaaaat aaatggtatg ataatggaaa
241 agatagatat agggcttttt ataaagatct tgtcattgat tgtactgcta aaaaatgtat
301 tccaatttta gaatgtaatt ttttatacta tggaaagtat ttacatatgt ttggtaaaaa
361 agttcatta atatgcttag taagagatcc aattaaatg gttgctagtg tatataatta
421 caaagtgata aaagataaac aaaaattaca tttcagtaat aagaataata atgaagttat
481 gtttgataat tatttttaca ccacaacaaa atctaaatca attattgatt taaatgaatt
541 aaagaaaaga attattcatc aaagaactat tacaagtaat atgagattta catatattgc
601 aaaaactcat attcaaaatt taaaaaatat ggataaggtg tattatatcg attcctctga
661 aataagtgca tctaaggcat atttaaaatt aaaagagatt ggggatattg tagggtttag
721 tgttcctgaa gattttaatt tgattaataa gataagtttt acacattatt taagattcat
781 atttgatatt gataggcaa ttatatatac acatcaaatt aatcctgacc ttaatttgca
841 aatttttata tttcatatgt atcaacaac tgagagacag gatatcacac atctttttaa

```

```

901 tcttcaacag tatgatagtt ctatgcataa tttttttatt tgtacagata cacaagatta
961 tgatataata atacatgatg aaaaaattct gtatgaaatt cgtgataata tattgaattt
1021 ttttaataaa ataaataatc atatagccat attaagaaag gaagcaataa gtgaagagga
1081 ttttttgaag atttataaag aagataagca aacatctgat gcttttaaaa agcttattga
1141 agatgaattt aaggatgttt tagaaaagga aagtatgttg aaaaaatgga accattattt
1201 aaaatttata aaactgtaaa aaaaagaggg ggagttttaa agatgtacaa tattgtacta
1261 gcttcagata ataattatat taaatatgtt ggagttgttt tatcaagtat tattaanaat
1321 acaaaaagaaa atgataatth tgcaaatgaa aaatatatth ttcattgtth gacaagcgat
1381 ataagtttga ataatacaaa aaaactacaa acccttggtg attatthtct aaatatatat
1441 ccatgtgaat taaaaattca tattattgat gatagccagt ttcattgaatt tccaaaagca
1501 tggcatgtaa atcatgcaac ttattataga tttgaaattg ctaatattht aggagatgaa
1561 gtatccaaat gtctatatat tgatgcggat gtttttagcat gtgatgatat tagagaaatt
1621 tttcatattg atthaagtgg taaaattgth ggagttgtaa cagattcatg ttcgcaatta
1681 tggacaaagt taaaatcaag acatactgac aatthtaata ttaattthga tccgatatat
1741 tttthtaatg ctggcgtht tatgattgat ttaataaath ggagacagtg tgatattaag
1801 caaaaatgta tccaagctth tttggattat gatcacggcg gtctagctga tcaaagctat
1861 cttaatatag cactaaaaga ctctatatat aaattacctt taggttgga tctaatagca
1921 cctgaatatg ttttgctaca aggttatgag agacattatg ttcaaaaatg tctagatgaa
1981 ggaaaagatt acaatatagc atatacaaga aaagaattht gtcaagcgct aaatgaaaaa
2041 aaaatagthc atthttgtgc tgcaaacct tgggtggaatt tatattataa aaatgagaga
2101 gtagatttht acgaaaggaa aatthggtgg gatatcgcaa taaatatgga aggtthtaag
2161 gaagatttht gatattthaag atthaatcta gaattagaat acctaaatag aaagataaath
2221 tcaatagcta gcaatgggat taaacatgta actaaaatha tccaagttha tcataatgcc
2281 aaatcccgta tccaaaatca attatcttht aaactaggtc aaatagcctt aattaattct
2341 aagagtatth taggtthgth atgtatgcct gtgtatataa tatctaccat cattgtgcat
2401 gttcaagata aaaaaatata tcataatgca ataaaaaaag atcctagtct aaaattatthg
2461 cccttagaac aataccctga ttacaatgag gcaatthaac tthaacagca tttthcatat
2521 aaattaggaa gtgtaattat gcattcattg aaatattggt atthagggtg aatthtagct
2581 ctaccttht gagttthta gctthtataa aatcataaaa aaaagatatg acaaatgaaa
2641 accgtaggta tagtaatccc tatctataat gtggaaaaat acttaagaga atgtthggat
2701 agtgthtca atcaaaccta tgctaactta gaaatcatac tagtaaatga tggtagcata
2761 g

```

//

>>BfR-CA-15838\_min\_cov\_30 putative plasmid location

```

LOCUS      OIDGCHHC_1                37091 bp    DNA        linear      12-APR-2021
DEFINITION Campylobacter species strain strain.
ACCESSION
VERSION
KEYWORDS   .
SOURCE     Campylobacter species
  ORGANISM Campylobacter species
            Unclassified.
COMMENT    Annotated using prokka 1.14.6 from
            https://github.com/tseemann/prokka.
FEATURES   Location/Qualifiers
  source    1..37091
            /organism="Campylobacter species"
            /mol_type="genomic DNA"
            /strain="strain"
  gene      complement(376..2841)
            /locus_tag="OIDGCHHC_00001"

```

CDS complement(376..2841)  
 /locus\_tag="OIDGCHHC\_00001"  
 /inference="ab initio prediction:Prodigal:002006"  
 /inference="similar to AA sequence:RefSeq:ASI88309.1"  
 /codon\_start=1  
 /transl\_table=11  
 /product="IncP-type conjugative transfer protein TrbE"  
 /protein\_id="Prokka:OIDGCHHC\_00001"  
 /translation="MLALKEFRSKAKAFPDIILNYASFIDEGILLNKDGS�TAGFYRA  
 GDISSMTINERNTLSARINSVLKTLGNWAVHIDCSRIKTENYIDGDTFYKNNIAQIL  
 ENERKHFDNVEHFENLFTMIIFTYLPPhKSINKITDLMIIDETKNKNQGDKILEYFKN  
 TLQKLEDSLSNYIKIERMLPRIAIDEYNNYILDDMLEYINFCICGERQKIILPNAMP  
 FLDCLLGGRRHFETGMHPRIDNQYIGIIAIEGFSPSEYPNINLALTELNFDFRNFTRFI  
 FLDDFEAQNSLNKYRKKWQQTKGWLDQLDRPARKQDDHAVLMVQELDSALSESKSG  
 MIGYGYTANIVVFRDYESLEYKLDIRKVLLENLGLSRTETINSVEAYLGTLPGFV  
 YPNLRRPILNLTNLTHLIPLASIWAGDKYNSSERFPPNSPPLMQVVTSGNTPFRLNLH  
 VSDLGHTLIFGPPGSGKSTLLANIFLAWQKYPNAKIYAFDKGQSLAPLATGGIHYD  
 VAGDHSSLAFAPLANIKTDAEIAWAEFWIETCLKLQNVNITPKQKLIHEALISHINT  
 NSTSLTEFVSALQSDLRDALNYTISGTGGFLFDSEEDKLSLSSITTFEIEELMNLG  
 DQYIIPALLYIFNRIEKGLDGSPTLLIIDEAWIALKHPAFKDKIVNWLKVLKANKAVAV  
 IMATQSLSDSAKSGILDILQEYCPTKIFLPNPEAYKKGSENVLAPYDFYKIFGLNDVQ  
 ISIINNAIQKREYYYSPLGTRLFNLALGKTNLAFITISDKVSVKRVRLYEKHKENW  
 AYKWLEEKEINYKRFDNSQKEEA"

gene complement(2845..3132)  
 /locus\_tag="OIDGCHHC\_00002"

CDS complement(2845..3132)  
 /locus\_tag="OIDGCHHC\_00002"  
 /inference="ab initio prediction:Prodigal:002006"  
 /inference="similar to AA sequence:RefSeq:ASI88308.1"  
 /codon\_start=1  
 /transl\_table=11  
 /product="IncP-type conjugative transfer protein TrbD"  
 /protein\_id="Prokka:OIDGCHHC\_00002"  
 /translation="MEELQSIDIYSALNKPNIIFGADRELILMVGVISFALIFTGATL  
 LTSIIGIFLFFFCNMLLRLMAKSDPLMRQIFLRQIKYKFFYYAQSTPFSKD"

gene complement(3132..3428)  
 /locus\_tag="OIDGCHHC\_00003"

CDS complement(3132..3428)  
 /locus\_tag="OIDGCHHC\_00003"  
 /inference="ab initio prediction:Prodigal:002006"  
 /inference="similar to AA sequence:RefSeq:ASI88307.1"  
 /codon\_start=1  
 /transl\_table=11  
 /product="Conjugative transfer protein TrbC"  
 /protein\_id="Prokka:OIDGCHHC\_00003"  
 /translation="MKKFLILFLAFSLEYAFASSTTGAGLPWEGPLEQIKASLSGPVAF  
 VISILAIIGAGAGLIWGGELSGFIKTLFYIVLVIALIVGANSFMSLFSTSGALI"

gene complement(3438..4376)  
 /locus\_tag="OIDGCHHC\_00004"

CDS complement(3438..4376)  
 /locus\_tag="OIDGCHHC\_00004"  
 /inference="ab initio prediction:Prodigal:002006"  
 /inference="similar to AA sequence:RefSeq:ASI88306.1"  
 /codon\_start=1

```

/transl_table=11
/product="Conjugative transfer protein TrbB"
/protein_id="Prokka:OIDGCHHC_00004"
/translation="MSNLEFQARINEKIKREFGDILTHLEDKETIELMLNSDGKWLWE
KLGQDMICLGEFSEARAISIITAISTLLDTTNADNPILECELPLDGSRFEALLPPIV
AKPTFTIRKKAVKIFTLGDYVDSNIITPNQKEVLINAIIERQNILVVGTTGSGKTTFS
NAIIDGISKITPDHRIVIIEDTAELQCASENKVILRATDKVDMLRLLKATMRLRPDRI
IVGETRGKEALDLLKAWNTGHPGGIATIHANSANGGLTRMEQLISEATSAKMSKLIAE
AVNLIVFISKSKEGRKVKEIIVKVIDYENDKYITQTI"
gene complement(4916..5656)
/locus_tag="OIDGCHHC_00005"
CDS complement(4916..5656)
/locus_tag="OIDGCHHC_00005"
/inference="ab initio prediction:Prodigal:002006"
/codon_start=1
/transl_table=11
/product="hypothetical protein"
/protein_id="Prokka:OIDGCHHC_00005"
/translation="MLFNYEIINCQKPNNTMNIKRTYKVIRCFKNTDEASKYYQQA
WDLAQVNPLKANDSTSQRDKERLILDALGGILAEYGFYIKRNFQDIVNTEFKSS
IGQIDLLNNGKTLVRSSFPRNGINFAICNAKYNFKNICKYDNLKPNEMDKDFAC
VLFETTKNQMVKADEIIFYLIGGSTRKMMLDNTISYTDNLTAEDDLIIQKTNKYVIRL
YNALDIEGFEEKYMTTEELGYPKILNDQTF"
gene complement(5646..6563)
/locus_tag="OIDGCHHC_00006"
CDS complement(5646..6563)
/locus_tag="OIDGCHHC_00006"
/inference="ab initio prediction:Prodigal:002006"
/codon_start=1
/transl_table=11
/product="hypothetical protein"
/protein_id="Prokka:OIDGCHHC_00006"
/translation="MNKNSSSKLNNAKNIKNDDEFYTYQYEDINKELNFYKNAFKDRIVY
CNCDDPQKSNTKFFKLNFDRLKLLKLISTSFNSNGKGFIFIEKNPKPYQGLLENG
DFRSDETIKLLKESNIIVTNPFFSLFREFIDILISNQKDFLIIGNANAISYKNCFNMY
MKNKLWLQNCVRFINTKGELVEGARSFWFSNINNQKRKKISLNRKYNNQDYITYD
NYNAIEISKSDIPSDYTGIMGVPIITFLDKYNPQQFEIIGADYQVNSGELIYIKRNDW
NGKTDRAYINGKRLYSRIFIKHRGVNNAI"
gene complement(6586..6999)
/locus_tag="OIDGCHHC_00007"
CDS complement(6586..6999)
/locus_tag="OIDGCHHC_00007"
/inference="ab initio prediction:Prodigal:002006"
/inference="similar to AA sequence:RefSeq:ABS43377.1"
/note="conserved hypothetical protein"
/codon_start=1
/transl_table=11
/product="hypothetical protein"
/protein_id="Prokka:OIDGCHHC_00007"
/translation="MKKVYLDTNIFLDYFNTERTYHNEAKQLMYLLTNNIQIVFSED
MISTIAYLIKKNLNNFTHFLKDISLEKNFNITSFGVSVINMACDCYEKYRGDFEDYL
QYFCAEKEGCSAIYTMDDKFPNLKIPIKRYGEIDI"
gene complement(6996..7910)
/locus_tag="OIDGCHHC_00008"

```

CDS complement(6996..7910)  
 /locus\_tag="OIDGCHHC\_00008"  
 /inference="ab initio prediction:Prodigal:002006"  
 /inference="similar to AA sequence:RefSeq:CKG86570.1"  
 /codon\_start=1  
 /transl\_table=11  
 /product="hypothetical protein"  
 /protein\_id="Prokka:OIDGCHHC\_00008"  
 /translation="MSNEIEIKDLNEINKNNKRQVVYRKDNLSTDYITGEVVERNQII  
 VKKVQTKESFIKLFTEIDYIINLESQEKTLFFTLSSVDYKNVVRFDKSMKQNI  
 VLDKVLRSRAGMYRALNGLIEKKVIFKINREFVKSAGVGSDDCYLFPNPLVGRG  
 SWNDLKNLRHTITREWDFENLEVRENLEIEEYLGDFEIRNNQKQYQVKEINQEH  
 NETTKVKNTEIVIEEKNNSINNQYSFDKKEEPSINKKVLISNDTQPSLFDENQKE  
 QEARLFIEKYAGILT  
 GAYDSTKSAKEMKRELLDKDLEEGRI"

gene complement(8181..8534)  
 /locus\_tag="OIDGCHHC\_00009"

CDS complement(8181..8534)  
 /locus\_tag="OIDGCHHC\_00009"  
 /inference="ab initio prediction:Prodigal:002006"  
 /codon\_start=1  
 /transl\_table=11  
 /product="hypothetical protein"  
 /protein\_id="Prokka:OIDGCHHC\_00009"  
 /translation="MGCGVCSRLERQTNLTPPYCCKKSKRRLVSSNLQMSVSEICCKK  
 FFVFKSRLRRKRLKKNAFKYRYNSALIRFLIFPPVGGKLLVVGKLFLEKFI  
 FPNKLGKNYFFCLNMYHFLGKS"

gene 8971..9414  
 /locus\_tag="OIDGCHHC\_00010"

CDS 8971..9414  
 /locus\_tag="OIDGCHHC\_00010"  
 /inference="ab initio prediction:Prodigal:002006"  
 /inference="similar to AA sequence:RefSeq:ADN91794.1"  
 /codon\_start=1  
 /transl\_table=11  
 /product="hypothetical protein"  
 /protein\_id="Prokka:OIDGCHHC\_00010"  
 /translation="MKKLALVLAALVALNVSAFAGVITIHNSNLVKVSGSDDIYAKAA  
 LEDAKEDMRSQFNTDNL E IYAIESIKKDDPHEYDVLQRGDLKIERENMAK  
 GKTVYYNIFLVDRKTNWASTWKIECDHRDRPIKLSNGNKCKAGIYINRYNFK"

gene complement(9443..9691)  
 /locus\_tag="OIDGCHHC\_00011"

CDS complement(9443..9691)  
 /locus\_tag="OIDGCHHC\_00011"  
 /inference="ab initio prediction:Prodigal:002006"  
 /codon\_start=1  
 /transl\_table=11  
 /product="hypothetical protein"  
 /protein\_id="Prokka:OIDGCHHC\_00011"  
 /translation="MFAEQFGGLKAAGSEPMWMLIELAKGLLKVFAIYASAYVMWK  
 TILGGPDWTFRLMGISNSASDVITEDVGRRMENKTFMV"

gene complement(9914..11008)  
 /locus\_tag="OIDGCHHC\_00012"

CDS complement(9914..11008)  
 /locus\_tag="OIDGCHHC\_00012"

```

/inference="ab initio prediction:Prodigal:002006"
/codon_start=1
/transl_table=11
/product="hypothetical protein"
/protein_id="Prokka:OIDGCHHC_00012"
/translation="MKDIMDFRKLVEKYKKGNEAINDTIAKEILHYEILESLFVSTEV
ANKLVFQGGTALRICYDNNRYSELDFTLVDFVDFSMKLDLDFKHHFSQKIKDKYDLN
VEIIEPKKASQFVKKWEAKIALNFLNRKSKINIKIACIPSYDNQNMPIKENYKEIGAN
MILKVETLREILADKLVALLCRDYIKYRDLWDIKYLRDRNTISDYELVRKKLIDYNHA
DENTIKIMFENKEQLNNEKELENEFYNEMIRFLDEKIFDYCKNNNYFSDVLKIVKDEF
ENLKKKILSNQDLSLEDELSQLSKDLKINIIELARLFERYKNLNNKDDDMFWIGYNDV
KDILKKCFDKYCNSYKCNHTENKTKRKFH"
gene complement(10986..11537)
/locus_tag="OIDGCHHC_00013"
CDS complement(10986..11537)
/locus_tag="OIDGCHHC_00013"
/inference="ab initio prediction:Prodigal:002006"
/codon_start=1
/transl_table=11
/product="hypothetical protein"
/protein_id="Prokka:OIDGCHHC_00013"
/translation="MTHLELMDFLDYWDNKDKWLF TLSNFAVCFHKESLQNLKISLSR
LSKKGIVHVSGLYANPRTRCSMLFREYEVANHLRNKGYSYLSLETLLSQEGLISQI
PNRLTFVSLKFSHTYHTPYGIIIEYVQKKENPERFFDDCYDEKQVWVANQKKAIDDI
YRFNRSIDL YEEQMKDERYYGF"
gene complement(11627..12340)
/locus_tag="OIDGCHHC_00014"
CDS complement(11627..12340)
/locus_tag="OIDGCHHC_00014"
/inference="ab initio prediction:Prodigal:002006"
/codon_start=1
/transl_table=11
/product="hypothetical protein"
/protein_id="Prokka:OIDGCHHC_00014"
/translation="MTLEENIFLAKRNIIDNIYKSARLEGI AVTFPQTEAIYNGVNVN
NLKVNDIVAINNLK HAWNLF FETMSYPEVDFAYICEINKTIGANLINKAGFIRTYEVS
IGGTTWPKILHKEEILEELNKIKEIDNATQKAIALMLYLMRKQIFSDGNKRTAVLCA
NRVLIENGAGLVNIPVELISEFKEKLIKYYETNDMKDIMDFIYKNCIEGFVSVPESEE
EILESKKNQEMFARYRKKK"
gene complement(12375..12938)
/locus_tag="OIDGCHHC_00015"
CDS complement(12375..12938)
/locus_tag="OIDGCHHC_00015"
/inference="ab initio prediction:Prodigal:002006"
/codon_start=1
/transl_table=11
/product="hypothetical protein"
/protein_id="Prokka:OIDGCHHC_00015"
/translation="MEYEEYQEYKKNKNINYENILIGIGLNQVDNLKPSEYFYKA VEN
SSSYEELEEKIIIEYKNADNKEIARTKECDLVSQRIAKIIDDEGFSFSPITLKS IHRK
IFTDIFPQTMEKYVGNFRKVNIFKEEANLNGKSVNYANYDDILDLL EYDFEKEKKN DY
SKMNNDEL IKKISNFISNIWQVHPFTE"
gene complement(12958..13173)
/locus_tag="OIDGCHHC_00016"

```



CDS complement(12958..13173)  
 /locus\_tag="OIDGCHHC\_00016"  
 /inference="ab initio prediction:Prodigal:002006"  
 /codon\_start=1  
 /transl\_table=11  
 /product="hypothetical protein"  
 /protein\_id="Prokka:OIDGCHHC\_00016"  
 /translation="MAKTINRDILNSISKSAEMQENKTIEFEGNKNFTISFKVSQYNS  
 LKEHCEKNHTSMGKLIKDLLKEKKLIN"

gene complement(13200..13403)  
 /locus\_tag="OIDGCHHC\_00017"

CDS complement(13200..13403)  
 /locus\_tag="OIDGCHHC\_00017"  
 /inference="ab initio prediction:Prodigal:002006"  
 /codon\_start=1  
 /transl\_table=11  
 /product="hypothetical protein"  
 /protein\_id="Prokka:OIDGCHHC\_00017"  
 /translation="MLLIIDNITSQIDNCKHFSIAKNIIRDRIIFKNSLAEGKGILEV  
 DSKGASDLKAKEELNSLFKEFNL"

gene 13914..14108  
 /locus\_tag="OIDGCHHC\_00018"

CDS 13914..14108  
 /locus\_tag="OIDGCHHC\_00018"  
 /inference="ab initio prediction:Prodigal:002006"  
 /codon\_start=1  
 /transl\_table=11  
 /product="hypothetical protein"  
 /protein\_id="Prokka:OIDGCHHC\_00018"  
 /translation="MNKDKKYLNFSEYYEVRDFLELYPEKDRENIENILMTIGENKKS  
 KNLSFEFLYDFFKELGFEEKS"

gene complement(14122..14451)  
 /locus\_tag="OIDGCHHC\_00019"

CDS complement(14122..14451)  
 /locus\_tag="OIDGCHHC\_00019"  
 /inference="ab initio prediction:Prodigal:002006"  
 /codon\_start=1  
 /transl\_table=11  
 /product="hypothetical protein"  
 /protein\_id="Prokka:OIDGCHHC\_00019"  
 /translation="MQRGEAKIEFYSNINYLKKEFENGCVVSKFLYDKALKEKNFKMT  
 YKQFNKYFNDEFKNKIKIKETIQEDNQLQSLVLKNKEPIKLIKINTKSKKVFDAKFGKD  
 IKEDDLL"

gene complement(14465..14914)  
 /locus\_tag="OIDGCHHC\_00020"

CDS complement(14465..14914)  
 /locus\_tag="OIDGCHHC\_00020"  
 /inference="ab initio prediction:Prodigal:002006"  
 /codon\_start=1  
 /transl\_table=11  
 /product="hypothetical protein"  
 /protein\_id="Prokka:OIDGCHHC\_00020"  
 /translation="MDIKIATFEDIEFIKYCFLLGFKEKHFYNVRFIEKLEDIKNNG  
 VSGGIFIIKDGTNEKAGFAFCGKSKGSNIYEINMIYILEKFRNKKLATNFIKYEEKLI

gene PNNKIIARCDINYSQQAIFKHLGYQELSKKEKTNQYEFMILEKSI"  
15124..15507  
/locus\_tag="OIDGCHHC\_00021"

CDS 15124..15507  
/locus\_tag="OIDGCHHC\_00021"  
/inference="ab initio prediction:Prodigal:002006"  
/codon\_start=1  
/transl\_table=11  
/product="hypothetical protein"  
/protein\_id="Prokka:OIDGCHHC\_00021"  
/translation="MRKDKRIAIRLSEDEYKHIMQKAQNHLTISRRLRDLMSNYPIT  
CIVDQKVAHNVLNIAGDIGRLGGLFKHWLVRNEDNKVNFVSNKRTYNDIDEIVDQILD  
QILLKEQAKRIIQNDNQKDSKQKAE"

gene 15470..17626  
/locus\_tag="OIDGCHHC\_00022"

CDS 15470..17626  
/locus\_tag="OIDGCHHC\_00022"  
/inference="ab initio prediction:Prodigal:002006"  
/inference="similar to AA sequence:RefSeq:ASI88299.1"  
/codon\_start=1  
/transl\_table=11  
/product="IncP-type DNA relaxase TraI"  
/protein\_id="Prokka:OIDGCHHC\_00022"  
/translation="MIIKKIPSKKQNKSSFKNLSNYILDKDNNNAKVLVDYMLDKNNE  
MDKVEGYHFTNCSFDNEDNINEIINTQKLNNTTKQDKTLHLVVSFQEDENPTLEILQ  
AIEEIIAKSLGMEDHQRLSVVHSNTNHLIHIHAIKVNPHLTKVINPYNDVRILQETA  
MKLEKKYNLKLNDHISQKDKQSNKYNTHTMNCNFETWVKEKLSKQVDLMLKDEKTTFK  
DIKQFLAEYDLFRERRKGFVIAASKSEKLFCKASSIHRGLSKQALEKRFKELDLKQEK  
ENTKNIKEEKHEIKEQYQRPNKETSKTLWEKYLRIENEKKAELDKELRMLKLRNEFK  
TSIPSMKFNKNTFAHVKNQRMIFKKNQKELYQKYKRVSYRDFLISESLSGNEEATRAL  
RRTKTKINENENTLSSTQEKPKIFENVYITKEGYAVYKSGFNKAIDKGEMLKVSLIN  
DKDDKEFLNLSLLIAIDRFGNHLNITGDDKFKRNILEVANDYNLNVFSFDQRMQKIQE  
ENNNKRKEMKTRKVLKNIIEIKIKLTEQDKDIDENIKEKELKALKFSLKKISNSTPSI  
FKGELKGLGFSYKEIDSMDESVCIEIDGFIVNSANKEGLIAMNEEIKQTLIDDEEIK  
RFEKFEHLFLNTNKITDIAKGFYTRKIDADEYIKRFSMQESKINKVANAISSMLSDKN  
IDIMEKYAKKLEKDLKYQLKKEVIESNDINLNNF"

gene complement(17860..18411)  
/locus\_tag="OIDGCHHC\_00023"

CDS complement(17860..18411)  
/locus\_tag="OIDGCHHC\_00023"  
/inference="ab initio prediction:Prodigal:002006"  
/codon\_start=1  
/transl\_table=11  
/product="hypothetical protein"  
/protein\_id="Prokka:OIDGCHHC\_00023"  
/translation="MIKQIFNKITKHFNLKSSIKLNIAEHKDIDFIMWCIDDGIKHG  
HFINISKENIEKVITTFSLKIFIIINFNTVPIGIIIENHLLHYDYHYIINHSNNQKLY  
GLEINVLYITKEFRNKGIGSAIITYYEKETDYNKILARCEQNNSSKKSIIFFEKLGYYK  
IGFNKQPKHNMTHIILEKNLQKE"

gene complement(18404..18799)  
/locus\_tag="OIDGCHHC\_00024"

CDS complement(18404..18799)  
/locus\_tag="OIDGCHHC\_00024"  
/inference="ab initio prediction:Prodigal:002006"

```

/codon_start=1
/transl_table=11
/product="hypothetical protein"
/protein_id="Prokka:OIDGCHHC_00024"
/translation="MNNKQKQDQNSETEEKIIEIKNQKQDQNSETEKNTNDEENLSDSL
NKKQAEQYLKIAEDKHKLAINYFKYTYWIIIGYISIIITSIVICIGFESLIYDNYVINI
FLGTTSINIIGLGYIAMRWLFPNSYKKYD"
gene complement(18796..19266)
/locus_tag="OIDGCHHC_00025"
CDS complement(18796..19266)
/locus_tag="OIDGCHHC_00025"
/inference="ab initio prediction:Prodigal:002006"
/inference="similar to AA sequence:RefSeq:AVS36970.1"
/note="DUF4065 domain-containing protein"
/codon_start=1
/transl_table=11
/product="hypothetical protein"
/protein_id="Prokka:OIDGCHHC_00025"
/translation="MEKNSKLYSSKAIANEFIRLAQKDNKTLTHMQLQKLIYFTHAVT
LVIFKRPLVKDGFQAWPFGPVNLELYLELQSGKNGIEKYIDLQYHNDIKDDRETME
IIESIYKKGDKDGWELSKITHQKGPWSSVYEKGSNLIEDDAIIYFYSKDLK"
gene 19362..19490
/locus_tag="OIDGCHHC_00026"
CDS 19362..19490
/locus_tag="OIDGCHHC_00026"
/inference="ab initio prediction:Prodigal:002006"
/codon_start=1
/transl_table=11
/product="hypothetical protein"
/protein_id="Prokka:OIDGCHHC_00026"
/translation="MGLKPGPKRTAKSTGELDQRQRDNKNTPGNTSKLKPSKSSKK"
gene complement(19596..19820)
/locus_tag="OIDGCHHC_00027"
CDS complement(19596..19820)
/locus_tag="OIDGCHHC_00027"
/inference="ab initio prediction:Prodigal:002006"
/codon_start=1
/transl_table=11
/product="hypothetical protein"
/protein_id="Prokka:OIDGCHHC_00027"
/translation="MGFKLSSEAPKNENDFVNSARGETGNAKTGNAKRNKLMINFT
EEEYQILNQEASHMGLSLNSYVRFKIFRKD"
gene complement(19823..20509)
/locus_tag="OIDGCHHC_00028"
CDS complement(19823..20509)
/locus_tag="OIDGCHHC_00028"
/inference="ab initio prediction:Prodigal:002006"
/inference="similar to AA sequence:RefSeq:ASI88294.1"
/codon_start=1
/transl_table=11
/product="Plasmid partitioning protein ParA"
/protein_id="Prokka:OIDGCHHC_00028"
/translation="MIISVNEKGGSGKTTLAVNLSARLAEDGDNVLLIDADPQKSTE
VFSDMRSQSNLEPLFSNVSKTGVSLGDEIKRMKNAFDSIIIVDTGGRDSKEMRKAILSS

```

NIIIIPTIPSQYDVNVLDHMLEIYNEVIEINPNLLALVLVNRVSPNPF LAKEL ENLKE  
 YINEAKKEKGLDRVIMLESVIYERQAYRKAVIEGKSMKEFC DKNDKALNDFENFYQEL  
 LKIANEKLGV"

gene complement(20601..20996)  
 /locus\_tag="OIDGCHHC\_00029"

CDS complement(20601..20996)  
 /locus\_tag="OIDGCHHC\_00029"  
 /inference="ab initio prediction:Prodigal:002006"  
 /codon\_start=1  
 /transl\_table=11  
 /product="hypothetical protein"  
 /protein\_id="Prokka:OIDGCHHC\_00029"  
 /translation="MNKKELEEIIAKKHIIILDENDPILAVVSANEIIFDDFLEKIDL  
 LFTKYKTDLESYKFNIFNEIREYSKSNQEALKDIITQVQANQNTIKPSQEKTEDTKEK  
 KNTNINFWIIAIASQIIFLLVGLIIGIII"

gene complement(21062..21529)  
 /locus\_tag="OIDGCHHC\_00030"

CDS complement(21062..21529)  
 /locus\_tag="OIDGCHHC\_00030"  
 /inference="ab initio prediction:Prodigal:002006"  
 /codon\_start=1  
 /transl\_table=11  
 /product="hypothetical protein"  
 /protein\_id="Prokka:OIDGCHHC\_00030"  
 /translation="MRKTIAIFAFSFAFISILSYLIFYFGGFHFNYTRSMPLGLYKEI  
 NSSTFNKNDIVLLKIPQKKEILLKKIIAVSGDFVEVNTQGVFINESLLPNSKIFSFDS  
 EGNLLEFKPKRKLKENELFVMGENIKSYDSRYFGVVNQLQNEVKVKVLMISF"

gene complement(21534..22196)  
 /locus\_tag="OIDGCHHC\_00031"

CDS complement(21534..22196)  
 /locus\_tag="OIDGCHHC\_00031"  
 /inference="ab initio prediction:Prodigal:002006"  
 /inference="similar to AA sequence:RefSeq:ASI88290.1"  
 /codon\_start=1  
 /transl\_table=11  
 /product="Cell filamentation protein"  
 /protein\_id="Prokka:OIDGCHHC\_00031"  
 /translation="MWDSQENLSEFDKFLIKTNKIGAKSLDELFRKERDITNAKALEL  
 SKNPIKGNFDYQHLKNIHKYIFQDVFWAGKDRMEVGLHGNFGKYAPNGTITNFVPGK  
 DLNATAQQIFTWLKEDNYLKNKDLNDFAKNLAEFARNLNALHPFREGNGRTQRIFLN  
 ELAKNAGYKLDLNLIPKDKTIMASVEASQLKLGKLEAIIKTNLKSFRQNL DLEQNKGI  
 SL"

gene complement(22196..22435)  
 /locus\_tag="OIDGCHHC\_00032"

CDS complement(22196..22435)  
 /locus\_tag="OIDGCHHC\_00032"  
 /inference="ab initio prediction:Prodigal:002006"  
 /codon\_start=1  
 /transl\_table=11  
 /product="hypothetical protein"  
 /protein\_id="Prokka:OIDGCHHC\_00032"  
 /translation="MQKQYPEVHSLEESLAILQKYKDDL TKEQYEAIRSNIGNFAIED  
 MFLNERNIIDNIKIIKGEATANEIITEYKKEWGIS"

gene complement(22526..23245)

CDS /locus\_tag="OIDGCHHC\_00033"  
complement(22526..23245)  
/locus\_tag="OIDGCHHC\_00033"  
/inference="ab initio prediction:Prodigal:002006"  
/inference="similar to AA sequence:RefSeq:ASI88288.1"  
/codon\_start=1  
/transl\_table=11  
/product="IncP-type DNA transfer protein TraL"  
/protein\_id="Prokka:OIDGCHHC\_00033"  
/translation="MAKIHVFLNGKGGIGKSFISLLCQYFLDKGESIVAIDTDPNNT  
TLLNVKALKAKFLQLIDDDGKFDVRAFDFKIVELAFEKKAENYIIDS GATTFIPLIDYL  
KENEVLDFTNNNLEVYMHVPIVGGQARDDTILGLTQLTEAFNC SFVWVINEYHGSII  
KDNLEFEETKEYQAIKEKIKAIVYLNALSKDTFGKDLLELTSKNTLTFGEAMQDKSFSL  
MSKQRLKIFKDKAFSQIGNIL"

gene complement(23256..25079)  
/locus\_tag="OIDGCHHC\_00034"

CDS complement(23256..25079)  
/locus\_tag="OIDGCHHC\_00034"  
/inference="ab initio prediction:Prodigal:002006"  
/inference="similar to AA sequence:RefSeq:ASI88287.1"  
/codon\_start=1  
/transl\_table=11  
/product="IncP-type DNA transfer coupling protein TraG"  
/protein\_id="Prokka:OIDGCHHC\_00034"  
/translation="MKKQTNQALVYILGLIGIFLFTTIISQIATQYLAKSFNYSPSLG  
ETLLYGFYNPFKWISWSYAYYSFYPDFFKKFFMVMLAGIAFCFIVFILVKLAFLRKAK  
AIENLHGSAHWATLEEVKESGVFDKDKGVYIGGFHKKTLHYLRHDGPEHVMLFAPTR  
SGKGVSLLLPTLLSWEESALIFDTKGELWALTAGWRQKYAKNKVLKLDPTCLDDSAVK  
FNILEEIRLETMHEIKDTQNIAINLIFKGETPPTNPTQGSTS YFKSEAGNFLVSIILY  
ALHLKKYRGENTPNLTDIYKFINDPNQSIDELLEEMVECDISTMDKNTQEIIQSISRS  
MKNKATQELSGVGTASEALNLYIDPILAKNTAKSDFKIKDLMNHESPISLYLIIPPG  
QKDRLRPFNLLINQIFRTLDDSLNFKNGENVKRYKHKMLVLADELTMFGKLGVLEE  
NLAYMAGYGMKFGYSIQDIQQLYSIYGEKETIISNCHIRIAFAPNKIETAKLLSEMGG  
ITTIVKKSITSSGKRTAVMLGNVSETIQEVQRPLITADECMRLPSAKKDKDDKIIAPG  
DMLIFIAGQAPIYQKILYFKDPAFLARSKVTLDKQVSDIL"

gene complement(25076..27289)  
/locus\_tag="OIDGCHHC\_00035"

CDS complement(25076..27289)  
/locus\_tag="OIDGCHHC\_00035"  
/inference="ab initio prediction:Prodigal:002006"  
/inference="similar to AA sequence:RefSeq:ASI88286.1"  
/codon\_start=1  
/transl\_table=11  
/product="IncP-type DNA transfer primase TraC"  
/protein\_id="Prokka:OIDGCHHC\_00035"  
/translation="MKNKDFIQETADKIIESLKNGTAPWIKPWKGIDLANMPPYNPIT  
NKPYNINSINLMLQNYNDPRWLT YKQAQSINAQVRKGEKSTLIQYWQFSEMVDKLE  
EGNVITNENGEVEQIEVKLENPKVFFAYVFNAEQIENMPKLEQKQEI DNFIKEAQK  
ILDDSKAIIHHKGNRAFYNANDTITLPPKENFLSEGAYTTALHEL VHWSGHESRLN  
RDLKNPFGSKEYAKEELRAEIASFLFNGKIGLDYDPGQHSYIDSWVQILEDKPNEIF  
KATSDATKIVNFLESLSLEQKQKIELENSNTQNQALKQDKELNLATRKYLYVPFE EK  
EFAKKAGAKWDKEAKM WYAPKGADLKNFTQWLNQSPLTQSYNNTHDEFKAFLEKYELN  
IEGQPI MDGKLHRVSVIGDKGREKSGAYVGF LNHPAGFVQNYKTGIKENWKSANSLE  
NTKNKEINLQNALEHNKALKEQRDKELNQAYENTAVKLENEYNNARWANSEHPYLKEK

GFDKNFYLKQDKNGNLLIPLRDIEGKYWATQRIFANGDKMIGATRTAEEKEQGIEYPA  
 KKQGNFFLLGAKNLNNVNEVYICEGFATSASVYEATKSPTIMGVDAGNLEIIVTNIKE  
 KYPKMNI IIIAGDNDVKELNGNKNVGKETALGIQKKYPEVKVVLNPNFTNQEAQKGLSD  
 FNDLMKSRGLEEIKKQLKEQIAKQLMVEKATTKALNKNKGINKEITARKDIGISL "

gene complement(27294..27434)  
 /locus\_tag="OIDGCHHC\_00036"

CDS complement(27294..27434)  
 /locus\_tag="OIDGCHHC\_00036"  
 /inference="ab initio prediction:Prodigal:002006"  
 /codon\_start=1  
 /transl\_table=11  
 /product="hypothetical protein"  
 /protein\_id="Prokka:OIDGCHHC\_00036"  
 /translation="MKDFKELETIPNFSYEVDPLTAEELGAFKENALSEDDAKEGTED  
 QG"

gene complement(27421..27783)  
 /locus\_tag="OIDGCHHC\_00037"

CDS complement(27421..27783)  
 /locus\_tag="OIDGCHHC\_00037"  
 /inference="ab initio prediction:Prodigal:002006"  
 /inference="similar to AA sequence:RefSeq:ASI88284.1"  
 /codon\_start=1  
 /transl\_table=11  
 /product="Single-stranded DNA-binding protein"  
 /protein\_id="Prokka:OIDGCHHC\_00037"  
 /translation="MINNITIGGRLTADAELRHCNQGSIICTFTLANNRKYKEIENST  
 YIEVSLFGSFANAMHPYLKKGISVDVVGELTQDTWEHEGKIYSKHKRIKAKEIDFRTPK  
 KEKQTIPNIEEGENYEGF"

gene complement(27776..27877)  
 /locus\_tag="OIDGCHHC\_00038"

CDS complement(27776..27877)  
 /locus\_tag="OIDGCHHC\_00038"  
 /inference="ab initio prediction:Prodigal:002006"  
 /codon\_start=1  
 /transl\_table=11  
 /product="hypothetical protein"  
 /protein\_id="Prokka:OIDGCHHC\_00038"  
 /translation="MENENLEENKPTQFDDNEPSLFDNLEDEEQDND"

gene complement(27880..28425)  
 /locus\_tag="OIDGCHHC\_00039"

CDS complement(27880..28425)  
 /locus\_tag="OIDGCHHC\_00039"  
 /inference="ab initio prediction:Prodigal:002006"  
 /inference="similar to AA sequence:RefSeq:ASI88282.1"  
 /codon\_start=1  
 /transl\_table=11  
 /product="T-DNA transferring Peptidoglycan hydrolase  
 VirB1"  
 /protein\_id="Prokka:OIDGCHHC\_00039"  
 /translation="MIDIALIEQCKNPVETQIIQKIIQVESNNQQFAININKVGSFI  
 LKNKKEAENLANNFIKGGYSVDIGLMQFNNSNLSSTFSHYSVEDLLDTCCKNIKAGSD  
 IFYLAYEMTNKLNKEDRINQALSIYNTGDLKKGFSNGYVAKYDSTAKTIDDLEEKAR  
 KSDTRIKITYNLFNLQTQKKE"

gene complement(28418..29659)

CDS /locus\_tag="OIDGCHHC\_00040"  
 complement(28418..29659)  
 /locus\_tag="OIDGCHHC\_00040"  
 /inference="ab initio prediction:Prodigal:002006"  
 /inference="similar to AA sequence:RefSeq:ASI88281.1"  
 /codon\_start=1  
 /transl\_table=11  
 /product="Conjugative transfer protein TrbI"  
 /protein\_id="Prokka:OIDGCHHC\_00040"  
 /translation="MLEVNMSPNKFLPKNNKRLSKVPIIIIFAIIAIVLFSIFYVALS  
 RKQNLERQTAQTTPKEETQIATNHNDLNLIDELQVQKAQENNIISPPMPNATQQPI  
 QETNSQTTQQPPNNTPVLVQNNNAIDEEKEMKIKKDMQLKALLSNTKLDIKTEATDSKKN  
 QAINFNPPNNNEDINLGAINPQNTGLGLESGTNKDVQGGQFLSQKKNGLKYVKQKP  
 LSTYEIKAGWNIPAILITGVNSDLPGQILAQVTQNVYDSATGKYLLIPQGTKVVGAYS  
 SNIIYGQSRLLVAWNKLIFPNGDTLNLIDGMQGTSDGTYTFEDQVDNHYFRIFGSAFL  
 LSSISAGIALSDNSDTNSEKETASDKAIAQAIQQMGQVASEMIRKMNISPTLKIRPG  
 YKFNIFVTKDIILEPLELND"

gene complement(29663..30106)  
 CDS /locus\_tag="OIDGCHHC\_00041"  
 complement(29663..30106)  
 /locus\_tag="OIDGCHHC\_00041"  
 /inference="ab initio prediction:Prodigal:002006"  
 /codon\_start=1  
 /transl\_table=11  
 /product="hypothetical protein"  
 /protein\_id="Prokka:OIDGCHHC\_00041"  
 /translation="MKILFLALIAFFITSCAKMNSDYFNSSFAVEETKINYNKIADDF  
 SQFIISYAPNKTTFFINEDKNNQDFSNYFINTLRKKGYAISNDNSKDLTFLSYQIS  
 QIDNENIVAIIFNINESKINVIYKIIENKLVKPNITSFNFTPKTKG"

gene complement(30103..31257)  
 CDS /locus\_tag="OIDGCHHC\_00042"  
 complement(30103..31257)  
 /locus\_tag="OIDGCHHC\_00042"  
 /inference="ab initio prediction:Prodigal:002006"  
 /codon\_start=1  
 /transl\_table=11  
 /product="hypothetical protein"  
 /protein\_id="Prokka:OIDGCHHC\_00042"  
 /translation="MKKFISNTNTATREIHHTPTSGARLISLDCNYTKEYNNYDEFS  
 GIHLSSFRGLDFRHKGANLVANTPKNYTQKLKLSLIALLLFIGSSAYANNLNERDF  
 SNLTPKEKDLAIAQKWINSKTTTIQGNNGEVIFLFGESMPSIVTAPLRLTDIALEPG  
 EVIKDVQIGDSIRWAVSLSVSGEOPYLISHIIKPTDKNLQTTMNMINKRVYRLNLI  
 SEAKKFMPAVSFNYPNSIIKTLEDYKNQMKAKSESKNFYKTKDDEIPSNIENLDFGYS  
 VEGNAPFKPLRIYNDGIKTYIQMPKNLKFYEAPALMILDSSNEKQIVNYRLKYDTFIV  
 DRLFNKAILLSNVGSKQEKIKITKHSNKANQDIVNNVLYDLSLQNKKENK"

gene complement(31270..31965)  
 CDS /locus\_tag="OIDGCHHC\_00043"  
 complement(31270..31965)  
 /locus\_tag="OIDGCHHC\_00043"  
 /inference="ab initio prediction:Prodigal:002006"  
 /codon\_start=1  
 /transl\_table=11  
 /product="hypothetical protein"  
 /protein\_id="Prokka:OIDGCHHC\_00043"

```

/translation="MNIFRQKQKIEKNEFDTSSNPYLNKTEWLERYGDIYITRAKNWQ
MVAIISLAMCFVCVLFIFYIGSQNKLIPYVIEVDKLGNTAKVGMVQNIDLKPNVVIKY
SLNTFIYSWRSVWGNAETQRKFIIDAYAYVEPRSKAFNYLNSEFQKNNPFTRATKENV
RVKIKNIVPQNIDTWQVEWEETTTNLNEDILSKETYRGLIRIKQIIPNTEEQILKNPL
GIFITDINFAKIL"
gene      complement(31984..32313)
          /locus_tag="OIDGCHHC_00044"
CDS       complement(31984..32313)
          /locus_tag="OIDGCHHC_00044"
          /inference="ab initio prediction:Prodigal:002006"
          /codon_start=1
          /transl_table=11
          /product="hypothetical protein"
          /protein_id="Prokka:OIDGCHHC_00044"
          /translation="MLWNNKTNARVVSPYISVSQTAIYFLDLKKIFLISSLKSVITT
AITAMKRLKSSIMDSYLFGFHPHTQPNSQKSSISHKRTKLPNKQVVKPLELQSIYQ
MDKLIIS"
gene      complement(32300..33508)
          /locus_tag="OIDGCHHC_00045"
CDS       complement(32300..33508)
          /locus_tag="OIDGCHHC_00045"
          /inference="ab initio prediction:Prodigal:002006"
          /inference="similar to AA sequence:RefSeq:ASI88318.1"
          /codon_start=1
          /transl_table=11
          /product="IncP-type conjugative transfer protein TrbL"
          /protein_id="Prokka:OIDGCHHC_00045"
          /translation="MKITTKTLLNGNKLAIIFLIFLAPNLAFGVESAEGVLSIIRNGL
LSWTPLIKTACLWVFWTLVAIDLWTFGLKALSGFEFGEFLATLIKKIMYVGFIFLFLF
NIDQWLQIIFNSFSQLATNVNGGLEISPSNIIQNAFKIVMIISSMSVTSPGESFFKV
ICGVIIILIAFVLMAVDLLIVYLKFFLMNVIVFFALALSGLNHFKQIGLNPIMTAIKVG
VELFMIQGLMALSITIIIEKIYNEMDQKITYEITLGILVTALIFCMITKMVPGIIEAVF
NGSIGESAGTAAGFRAVATMAAGAAAGAAAGAVGITRAMNAKALHLAEGGAGGMDLV
KGVAKNLAGAGGEHLRDNLTKGRMPNQMANRLQEKLKDIQGKTSEGGISSGSPKQENY
QSGINPDAME"
gene      complement(33471..33749)
          /locus_tag="OIDGCHHC_00046"
CDS       complement(33471..33749)
          /locus_tag="OIDGCHHC_00046"
          /inference="ab initio prediction:Prodigal:002006"
          /codon_start=1
          /transl_table=11
          /product="hypothetical protein"
          /protein_id="Prokka:OIDGCHHC_00046"
          /translation="MKHFIFSGLIGLGALAFLAGCGDEAKTSDYYKAHLEEKARVAE
CKKMEKMNETQQRDCSNAKWAVEMQTDNRVPGIGKNENYNKDALKWK"
gene      complement(33799..34602)
          /locus_tag="OIDGCHHC_00047"
CDS       complement(33799..34602)
          /locus_tag="OIDGCHHC_00047"
          /inference="ab initio prediction:Prodigal:002006"
          /codon_start=1
          /transl_table=11
          /product="hypothetical protein"

```



```

/protein_id="Prokka:OIDGCHHC_00047"
/translation="MKKSLFGVKKATLAIATLLIGTNNAFAGGIPVIDVSAIANQVK
DYAMQLQQYEQMYSQLQQQIQMVQMQRNLERLTKEDWDNLGTVLYQTRNVMNKVNGI
SYDIGNVSRKFEDTYKDFEGYSNDLENATNESERNKIYSDRYKQIAETNQNTFNGTLQ
QLELRQDLESEDALIAKQNSQNSNGNLQAVQATNDLLAYQIDEIRKLRVIMDQS
NMLTNYLASQNNKNVLEQAKINKQLESDNRVPYGGIGKNENYNKDALKWK"
gene complement(34887..35471)
/locus_tag="OIDGCHHC_00048"
CDS complement(34887..35471)
/locus_tag="OIDGCHHC_00048"
/inference="ab initio prediction:Prodigal:002006"
/codon_start=1
/transl_table=11
/product="hypothetical protein"
/protein_id="Prokka:OIDGCHHC_00048"
/translation="MSNTSIININNQEVIFENKDEQVFCSTLSDVAKVFGKQHKNVLRD
IENILNDLREIGTSNYLLNFELSFKVHKIQGFKGRERKYPYYQLTKDGFLLAMGFTG
KKALQFKIAFINAFNEMERIIKNQYTPKLENYNKYKIPNTPYKENIIKAIMQTEQNRN
CEFEELIAYEIKEIYKDNKSHIEQKINFVKGLI"
gene complement(35483..36349)
/locus_tag="OIDGCHHC_00049"
CDS complement(35483..36349)
/locus_tag="OIDGCHHC_00049"
/inference="ab initio prediction:Prodigal:002006"
/inference="similar to AA sequence:RefSeq:ASI88311.1"
/codon_start=1
/transl_table=11
/product="IncQ plasmid conjugative transfer protein TraQ"
/protein_id="Prokka:OIDGCHHC_00049"
/translation="MKNFIFGVNKTIGKSHPHKNEARLKSLDYNYTKEYNRYEICVT
QFNHLFSEVKFSHRVAALWLPKNTYQKLLKLSLIASLLFFIGSNAFADDILTGDTKL
ACEAILCLSSGTRPSECSSSLARYFSIKFKKPWETINARRAFLNLCPIQNDANIEDLV
LNNLVDDVLPVSDPRQCTPNYLNTQVETKRSYSTFGIMSYPINPNMNFCHALINHAY
TDYKTPKYKCTGEFYNSLEWKLAKLQLITQQAYESLSDQRYMISRTCGRNCDYDY
QKIPFTKECWY"
gene complement(36346..36900)
/locus_tag="OIDGCHHC_00050"
CDS complement(36346..36900)
/locus_tag="OIDGCHHC_00050"
/inference="ab initio prediction:Prodigal:002006"
/inference="similar to AA sequence:RefSeq:ASI88310.1"
/codon_start=1
/transl_table=11
/product="Phage antirepressor protein"
/protein_id="Prokka:OIDGCHHC_00050"
/translation="MSKVILFENKELGQVRTIRDKNNEPLFCLNDVCKILNIKKTNSV
RDSINKEFDKGGVFEWHPFKTLGGIQKFIVINEPELYFVLMRSDKPKAKPFRQWVIKE
VLPSIRKQGYYSFDNTPKLENYNKYKIPNTPYKENIIKAIMQTEQNRNCEFEELIAYE
ITEIYKDNKSHIEQKINFVKGLI"
gene complement(36897..37052)
/locus_tag="OIDGCHHC_00051"
CDS complement(36897..37052)
/locus_tag="OIDGCHHC_00051"
/inference="ab initio prediction:Prodigal:002006"

```

/inference="similar to AA sequence:RefSeq:ABS43435.1"  
/codon\_start=1  
/transl\_table=11  
/product="Cpp32"  
/protein\_id="Prokka:OIDGCHHC\_00051"  
/translation="MGFTGKKALQFKIAFINAFNEMERIKNQYTPKLENYNKYKIPN  
TFYKEIA"

ORIGIN

1 attgattttt aataattcct tccatttcat taaaagcatt aatgaaagcg attttgaatt  
61 gtaaagcttt tttgcctgta aagcccattg ctaaaagaaa gaatccatct tttgtaagtt  
121 gatagtatgg gtatthttctt tctctacctt taaagccttg tattttatgg actttgaatg  
181 aaagctcaaa attgagcaga taattggaag tccctatttc tgcgaaatcg ttcaaaatga  
241 gttaaatatc tgctaataca ttatcatgtc ttttcccaaa aaccttagcc acatctaaac  
301 ttgtgcaaaa aacttgttcg tctttgtttt caaaaataac ttcttgatcg tttatattta  
361 taacagttag gttactcatg cttcctcctt ttgtgaatta tcaaactctt tgtagttht  
421 ttctthttct tctagccatt tataagccca atthttctta tgtttctcat aaagtthtct  
481 tactctthta acgcttactt tgtcgttat tgttthgaag gctaaattag ttttccgag  
541 tgccaaatta aaaagtctag tgccgagtgg agaggtgtaa taatattctc tttthtgaat  
601 ggcatattg ataatgctaa tttgcacatc gttaatgcca aaaatthtatt aaaagtcgta  
661 aggagctaaa acatthttcac ttcctthttt ataagcttcg ggattaggta aaaatthtt  
721 agtagggcaa tattcttgta aaatatctaa aattccactt tttgcactat cgcttaagct  
781 ttgtgtagcc attataacgg ctacatthtc ttttctthaa actthtaagcc aattaactat  
841 thtatcttht aacgcagggt gctthaatgc aatccaagct tcatcaatga tgagthaatg  
901 aggactthca tctaagcctt thtctatacg attgaaaatg tagagthagg cagggtatt  
961 gtattgatct ctaaatthca tcaattctt taththcaat gthtthgatac thctthagct  
1021 taaththtct tctctgctgt caaataaaaa accactgtt ccagaaattg tataataatt  
1081 taaagcatct ctthaatcac tatctthgaa agctgataca aattcagthca aagaagthaga  
1141 atthgtattg atatgagaaa thtaaggctt atgtthaat ththththgtt thggtthaat  
1201 atthacatth thgthathth agcatthttc aatccaaaat thcagccatg cgatthcggc  
1261 atctgththg ataththgcca aaggagcaaa agccaaagat gaatgatctc thgcccacatc  
1321 ataathgaatt ccactgthg ccagthgthg agctagcaag thththctt thtcaaatgc  
1381 gthaaathth gcaththggat atththgcca agcaagaaaa ataththgcca aaagagthaga  
1441 thtaccactc ccaggaggac cgaaaathaa agthgthctc aathcgtthaa catgthaaatt  
1501 taacctgaaa ggcgtattgc cagaagthac aactthgcatt aatgggggag aaththggagg  
1561 aathctthca ctthgaattat atthtatccc cgcccaata gacgccaag gaathaaatg  
1621 thgthaaagth agthgathth ataththgagc gcgthaaath ggatathcga atccagthaa  
1681 agthccthaa thcgtthcta ctgaathgat thththcggth ctthgatagaa agccthaatt  
1741 thcthaaaact thtctthtat ctththaatth atathcthaag ctctcataat ctctatcaaa  
1801 aacgacaata ththcggtht aathagccata tctatcata ccgctththg atthctgataa  
1861 thcagaathct agthctthgca ccatthaacac agcatgathca thththththc ththcagggcg  
1921 atctagthaac thgatcaagcc aactththgt thththththg caththththac gataththatt  
1981 aagthgaath thgagctthcaa agthcgtthaa aathataaat ctagthththga atctgthaatc  
2041 gaaathaaagc thctgthgagth catththaat atththgataa ththctgctth gaaagccctc  
2101 aathagcaata atthctthtat atthgathatc aathctthggg thcathctctg ththcgaathg  
2161 cththccacc aathaaacaat caagaaacat aggggcathth gthgaththata ththththgctc  
2221 ctaccacaaa atacaaaaat thaataththc aagcatathca ththaaathat actcathatt  
2281 atathctgthca athagctath thggthgath thththcath thththataat thctthaaact  
2341 atctthctaat thththgaagg thththththaa atactthaat atththththc cthgaththth  
2401 gththththgt thcgtcaatha thcatcaaatc gthgaththth thththgctth ththgctthg  
2461 aagthaaagth aathatcath thaaaagath thcaaatgth thctacathth caaaaathag  
2521 ththctththca thththcaagaa thththgcaat atthththth thaaaagthat cgccgthcaat  
2581 thagthththct gththththct thagagcaatc aathatgthacc gcccagccat thctagagth  
2641 thththaaaca ctathththct thagcaththaa agthaththct thathththth thcatggaact  
2701 gatathcccc thcagcaath aaaaaccagc thththaaactc cgtctththgt thgagcaaaat

2761 gccttcatcg ataaaacttg catagtttag aatatcgga aatgcttttg ctttgcttct  
2821 gaattcttta agtgctagca ttttttaatc ctttgaaaat ggtgtgcttt gcgcataata  
2881 aaatthttta tatttaattt ggcgcaaaaa tatttgtctc ataagcggat cgctttttgc  
2941 cattaatcctt aaaagcatgt tgcagaaaaa aaataagaat atacctataa tgcttgtaag  
3001 gagcgttgca cctgtaaaga ttagtgcaaa tgaatcact ccaaccataa gaataagctc  
3061 tcgatctgcg ccaaatatta aatttggttt gttgaggga ctataaatat ctatgctttg  
3121 caattcttcc attagattaa tgctccactt gttgaaaata gcgacataaa gctgtttgcg  
3181 cctactatta atgctatgac tagcacgata taaaagaggg ttttaataaa accgcttaat  
3241 tcgccgccc aaattaaacc tgctccagct ccaatgattg ctagaattga aataacaaag  
3301 gctacaggac cacttaagct cgctttaatt gtctctaag gaccttcca aggcaaacct  
3361 gctccagttg ttgaggcaaa agcatattcc aagctaaacg ccaaaaataa aattaaat  
3421 tttttcattt aaactcctta aattgtttgt gtgatgtatt tatcattttc ataatacaatt  
3481 actttaatga tttcctttac ttttctacc tccttactct ttgagataaa aacaattaaa  
3541 ttcacagctt cagcaattaa tttgctcatc tttgacttg ttgcttcaga gattaattgt  
3601 tccattcttg tgagtcctcc atttgcgga ttagcgtgga ttgtagctat tcctccaggg  
3661 tgtcctgtat tccaagcttt tagcaagtct aaagcttctt tgctcttgt ttcaccact  
3721 ataattctat cggggcgaag tcgcattgtg gctttcaaaa gcctaagcat atccacttta  
3781 tccgtagccc ttaaaattac tttgttttca ctgcacatt gaagttctgc tgtgtcttca  
3841 ataattacta ttctgtgatc gggagtgtt ttagaaatgc cgtcaataat ggcatttgaa  
3901 aaagtggttt taccactacc agttccgcct acaactaaaa tattttggcg ttcgataatg  
3961 gcattaatca aaacttcttt ttgatttggg gtaataatat tagaatctac ataatacaccg  
4021 agagtaaaga ttttgacagc ttttttctg attgtaaagg ttggttttgc gacgattggt  
4081 ggcaataaag cttcaaacct tgatccatca agtggcaatt cacattctaa tataggatta  
4141 tctgcatttg tagttgtatc aaggagggtg gagattgctg taatgataga ttttgctcta  
4201 gcttctgaaa attcgccaag acatatcata tcttgacctg gcttttcaag ccaaagtttg  
4261 ccgtctgaat ttagcataag ctctattgtt tctttatctt ctaaagagt taaaatatcg  
4321 ccaaattctc tttttatttt ttcattgatc cttgcttgaa actcaagatt actcattgaa  
4381 gagtcctttt gattcaattg caagagttaa aaatttgtca gaattttttt tgtatagatt  
4441 gtggagtgtt aaaagttaa aaattaataa aagttaaaga ttattctgct ctctctctct  
4501 ctctctctag ctattaagca aaaattaagt ttattttttc tcaaaaaatt ctcaaaaaat  
4561 taaaaactaa tatcgttatt atattatttt aaatttaatt gtcaagattt tttttctaaa  
4621 aaaatgatac atttttaata tttgaatgtt tatttttttc attttttggg aaaaaataaa  
4681 cttttttat aaaaaatttt ctattttgtt tcatTTTTTT tgagacaaaa tatagatttt  
4741 ttgcttttgt ccaaaaatat gatacatttt taacatttga atgtttattt ttttcatttt  
4801 tttgagacia aatacaattt ttaatttttg tgtcataaaa ttatcaaaaa tgaatcaat  
4861 tgaataaaaa cgtactaaaa ttatgaaca aaatagaatt ttaaataattc ttattttaaa  
4921 aagtttgatc gtttaattt tttggataac ctaattcttc cgtcatatac ttttcaaatc  
4981 cttcaatattc taaagcatta tataatctaa taaccttga attagttttt tgttgaatta  
5041 gatcatcttc tgctgttaaa ttatctgtat aactaatagt attatctaac atcatttttc  
5101 ttgtagaacc tcctattaga taaaatataa tttcatctgc ctttaccatt tgatttttgc  
5161 tggtttcaaa caatacacia gcaaagaagt ctttatccat ttcattaggt ttgtaaagat  
5221 tatcgtattt gcatatgttc ttaaaattat attttgcatt gcatattgca aaattaatgc  
5281 ctttcttgg aaaagaggaa cgaacctcta atgttttacc attgtttaac aataaatcta  
5341 tttgccctat cgatgattta aattctgtaa aattaacaat atctcaaaa tttcttttta  
5401 tatagtaaaa ccaaccatat tcggcaaaa tccccctaa agcatctaaa atcagccttt  
5461 ctttatctct ttgtgatgtg ctatcgtttg ctttaagtgg atttacttgt tttgctaagt  
5521 cccaagcttg ttgataatat tttgaagctt catcagtttt atttttaaaa atacatctaa  
5581 ttactttgta tgttcttttt atattcattg tattgtttgg tttttgacag tttattattt  
5641 cataattaaa tagcattatt aacacccta tgttttataa aaattctaga gtatagtctt  
5701 tttccattta tatacgtct atcggttttt ccattccagt ctttctgtt aatataaata  
5761 agctctccac tgtttacttg ataactgcc ccaataattt caaattgttg tggattgtat  
5821 ttatctaaaa atgtaatagg aactcccatt attccagtat aatctgaagg tatatctttg  
5881 gactttgaaa tttcaatagc attgtaatta tcatatgtaa tataatcttg attattatat  
5941 tttctattta aagatatttt tttatttctg ttttggttat taatatttga aaaccaaaaa

6001 gatcttgctc cctctaccaa ttctcctttt gtgtttataa accatctaac gcaatthttgt  
6061 cctaaccata atthtttttt catcatatag ttgaaacaat ttttataaga aattgcatta  
6121 gcatttccta taatcaaaaa atctthtttga ttgatataa gtatatctat aaattcccta  
6181 aatagtghaa atggtggatt tgttacgatt atattagatt cttttagcaa ttttaattggt  
6241 tcatcgcttc taaaatcacc gttatthttct aacaaacctt gatatthttgg cttatthtttt  
6301 tctataataa aaatthttacc cttaccatta ctattaaatg aagtactaat taatthttttt  
6361 agthtttaatc tatcaaaatt taatthtaaaa aatthttgtaa aattactthtt ttgtggatca  
6421 tcgcaattac aataaactat cctatctthta aacgcatttht tataaaaatt taattctthta  
6481 tttatatctt catattgtgt ataaaattca tcgthttthta tathtttttgc attatthtaat  
6541 ttagaactac tghthtttatt catttatact taaccttcta tatatthtaaa tatcaatctc  
6601 gccatatctt tttataggta ttttcaaatt tggaaattht ttatccatgg tataaatagc  
6661 actgcaacct tctthttcgg cacaaaaata ttgcaaatag tcttcaaagt ctcctcgata  
6721 tttctcataa caatcacaag ccatattaat gacacttaca ccaaaagaag tgatattaaa  
6781 atthtttttct aatghaaatatt cthtttaagaa atgagtghaa ttatthtaaat tttctthtttt  
6841 gataagataa gcaatggtag aaatcatatc ttcagagaaa acaatthtghaa tattgtttgt  
6901 gagtaataa tacattaatt gtttagcttc attatgatag gttctthtcag tattghaaata  
6961 atctagaaaa atatthtghat ctaaataaac tthtttccata ttctaccttc ttctaaatct  
7021 ttatccaata actctctthtt catttctthtt gctghatthttg tagaatcgta tgcaccagta  
7081 agtatcccag catatthtttc tataaatagt ctagcttctt gttctthtttg atthttcatca  
7141 aataaagaag gttgtghatc attagagatt aagactthttt tathttatgct cggctcttct  
7201 tthtttatcga agctatattg attgtthtata ghgttathttt tttcttcaat aacaatthttc  
7261 gtatthttthta cthtttagctgt ttcattatgc tcttghatthta tttctthtttac ctghatattgc  
7321 tthttghattgt ttcttathttc atcaaagcct agatattctt cttctatthttc taaatthttct  
7381 ctaacttcta aatthttcaaa atcccattct ctcghaatgg tatgtcttaa atthttthtaaa  
7441 tcattccaag atccgctgc tactaaattt ghgattaaata aataacaatc atcgctacca  
7501 acaccagcat atghatthttac aaattctcta tttatthttaa aaatcacttht cthttctatc  
7561 aaccctatthta aagctctata cattccagcc ctghcttaaaa cthttatctaa aacghatattt  
7621 tgcttcatag atthtatcaaa cctcacaaca tthtttataat ctactghaaga aagcaaaagta  
7681 aaaaataaag tthttttcttg agattctaaa ttghataatatt aatcaatatt ttcagtaaaa  
7741 agthtttaataa aactthttctt tghtttghaact tthtttaacaa taatthtghatt tctthttctaca  
7801 acttcaccag taatataatc agtagataga ttatctthttc tataaactac ttgccgtttg  
7861 ttatthtttat taatctcatt taaatctthta atthttctatt cattghctcat atthttatctc  
7921 tactghaattt ataaaatatt ghatacataat ttghagacaaa aagcaataaaa tathtttataa  
7981 aatataaaaat atthghatcat aatthtghagaa aaagthaacca taatctghctc cacaggtghag  
8041 ctaacttghc tcacaggtgha gactctthttgt ctactghatg agacagatta aaagthghctt  
8101 ghagcactat aaaataagca tttcaaagca tthtttaatta agccatctct tctatatcta  
8161 ttcttacaaa ttcaaactct tcaactthttt ccaaaaaaat ghatacatatt taagcaaaaa  
8221 aagthaattht ttcccaattht atthtghaaat ataaatthttt ctaaaaataa tthttcccacc  
8281 acghagcagtt tthtttcccac tghgtghghaaa atthaaaaacc ttatcaaagc actattatac  
8341 ctatattthga aagcathtttt tthtaagctt ttccttctta atctactctt ghaaaacaaaa  
8401 aatthttttac agcaaatthtc gctaacghctc atthtghaaat ttghaagagac taagcghctc  
8461 ttactcttct tacaacaata ghghcghghgtc aagthtctghtt ghctghcttag ghcactghc  
8521 acccghcacc ccatatctac ghcaatthata ghcactactt aggtghcaatt ghcttatatac  
8581 accaaaaata aaatathttag tthtghaaatt ctactthttca aatthaagtht aatthtthttg  
8641 aatatcghata atataggctt tthtataata aaaaatthttc tthtttaagtht tagagthattt  
8701 ttctthtghaaa ctthaaactaa tghghaaaaata ghghatthttthta ghgtthtaagat tthttaaaaac  
8761 tthaaactaaa atatthctthaa aaaaatctctgh tghctghctctt ttctatthttta ataaatthttt  
8821 aatthtttcta aaacctcttht ghgtctthtgha tagataaaga ghthttghagcta ctcacaaaa  
8881 ctataaaaat tactghatagg ghctatghcghc ghagccatata ghcctatthtt tthtghataat  
8941 acaaaaataa tthttcaatca agghagaacaa atghaaaaaat tagctthtagtht tthtagcghct  
9001 ttagthtghctt tghaatghatc ghghcathttgha ghgtghthatta ctatacataa ctccaatthtgh  
9061 ghthaaagtht caghghaagthgha tghatctat ghcaaaagcgh cactghaaga tghctaaagha  
9121 ghataghagha ghcaatthcaa tactghataat ttghagattht acghctatagha aagthtcaaa  
9181 aaagatghatc cghcatghaata tghatghattha caaagghghgh ghthtaaaaat aghaagagha

9241 aatatggcaa aaggaaagac tgtctattat aatatatfff tagttgtaga tagaaaaaca  
9301 aattgggctt ctacttggaa gatcgaatgc gatcatcgtg atagacctat aaaattaagt  
9361 aatggtaaca aatgcaaagc tgggtattat atcaatcgtt ataatttcaa ataatacttg  
9421 aaagctctaa aatttagagc tttcaaacca tgaaggtttt attttccatt cttctaccta  
9481 catcttcagt gataacatca gaagctgagt tactaattcc cattaatcta aatgtccaat  
9541 ctggtcctcc taaaatagtc ttccacataa cataagctga agcaatatag gcaaaaactt  
9601 ttaataaacc ttttgctaot tCGattaaca tccaagccat aggctcactt ccagctgctt  
9661 ttagaccacc aaattgttcc gcagaaaaca ctaagaacac atctttaata aaggaatgaa  
9721 agaataaagc taaatagata aataaaaaca tcaatattaa taaaaggaat ttaagaagtt  
9781 gcttagaaaa ttttgcctta aagttgattt tctgactcca tttatccctg taacccaaag  
9841 aatagctata cctaatacgc ttttaattgta atatfffcaa atggctctgc taaatgaata  
9901 aggtttatff ttattaatga aactttctct ttgttttgtt ttctgtgtgg ttttcgact  
9961 tatatgaatt acaatacttg tcgaagcatt ttttcaaaat atctttgaca tcattatagc  
10021 ctatccagaa catatcatca tctttattat ttagatfff atatctttca aacaatctag  
10081 ctaattcgat tatatffatt tttaaatctt ttgacaattg gcttagctca tcttccaaag  
10141 aaagatcttg atttgatagt atfffctfff ttaaattttc aaattcatct tttacaatct  
10201 ttaaaacatc ggaaaaataa ttattatfff tacaataatc aaagatfff tcatctaaaa  
10261 atctaatac ttcatataa aattcatfff ctaattcttt attgttgagt tgtttttctt  
10321 tgttttcaaa cattatfff attgtatfff catctgcgtg attataatca ataagctfff  
10381 ttctaactaa ttcataatcg cttattgtgt ttctatcttt taagtatffg atgtcccata  
10441 aatctctata ttttatataa tctctgcaaa gtaaggctac taatffatct gctaagatff  
10501 cccttagagt ttcaactfff aagatcatat tagcccctat ctctttgtaa ttttctffaa  
10561 ttggcatatt ttgattatca tagcttggaa tgcaagcaat tttgatatta atfffgtctt  
10621 ttctgtffaa aaaattaaga gcaatfffct cttcccattt ttttaacaaat tgtgaggctt  
10681 tttttggttc tataatffca acattffaat catatffgtc tttgatfff tgaactaaat  
10741 gttttffaaa atcatctaat ttcatgctat caaaatcttc tacatccaca agtgtaaaat  
10801 ctaaactctc agaatatcta ttattatcat aacatattct caaagccgtt ccgcttgaa  
10861 aaacaagfff gtttgcaact tcggtagaaa caaataaact ttctagaatt tcataatgaa  
10921 gtatffcttt agcaatagta tcattaattg cctcgttgcc tttttgtat ttttctaaa  
10981 gttttctaaa atccataata tctttcatct ttcatfff gttcctcata taaatctata  
11041 ctacgattaa atctataaat atcatcaatt gctfffcttt gattggctac ccaaacttga  
11101 cattffctat cataataaca atcatcaaaa aatctffctg gattffctt tttttgaaca  
11161 tactcaataa taccgtaggg agtatggtaa gtatgagaaa atffcaaga taaaaagtt  
11221 agcctgtffg gaatffgtga aatcaaacct tcttgcgaaa gcaaggtffc taaactaaga  
11281 taagaataac ctttgtffct caaatgatta gcaacttcat attctcgaaa taacatactg  
11341 catctcgttc taggattagc atataagcct ttgctcacat gaactatata tctttfftg  
11401 cttaatcggc tcaggcttat ttttaaattt tgtaaacctt ctttatgaaa acatacagca  
11461 aaattactta atgtaaatag ccatttatct ttattatccc aataatcaag aaaatccatc  
11521 agttctaaat gtgtcactta ttgtcctaaa taaaatata atatffgtat atfftatffa  
11581 atffaaataa aaataaattt aattataatc taatcctagc tcgtffctat tctfftttc  
11641 tatagcgagc aaacatffct tgatfftttt tgctctcaag tattctctt tCGtaggct  
11701 ctacgctaac aaatccttct atgcaatfff tataaataaa atccataata tctttcatat  
11761 catttgtffc atagtatffa attagctfff ctttaaacct gctgattagc tctactggta  
11821 tattgaccaa acctgcacca ttttcaatta aaactctatt agcacataaa acagctgttc  
11881 ttttgttgcc atcgctaaag atffgtffct cattaataa aagcattagg gcgatcgtt  
11941 tttgagtagc attatctatc tctffttatct tgtffaatc ttctaagatt tcttctffgt  
12001 gtagtatfff aggtffctaa gttgttccac caatagaaac ttcatatgtc cttataaaac  
12061 ctgctffatt tatcaatff gcaccgatag ttttattaat ttcgcaata taagcaaaat  
12121 caacttcagg ataactcata gtttcaaaaa gaaaattcca agcatgcttg agattatffaa  
12181 tggctacaat atcatffact tttaaattgt ttacatttac accattgtaa atagcttctg  
12241 tttgcggaag agtcacggct atgcctffca gcctagctga tttatagata ttatctataa  
12301 tgtffctfff tgctaaaaat atatffctt ctaatgtcat aatffgctt ctagtgtatt  
12361 accatgcaac gaatffatc tGtaaaaggg tgtacttgcc atatatffga aataaaatff  
12421 gatatffttt taatffactc atcatffttc atfftagagt aatcattctt ttttctfff

12481 tcaaaatcat attctaaaag gtctaaaata tcatcatagt tagcataatt tacagattta  
12541 ccattcaaat tagcttcttc tttaaaaata tttacttttc taaaatttcc tacatatttc  
12601 tccatggctc gtggaaaaat atcagtaa atttttctat gaatactttt aagcgtaatg  
12661 ggtgaaaaac taaaacctc atcatcgata attttagcaa ttctttgaga tactaaatca  
12721 cattctttag ttcttgcaat ctctttattg tctgcatttt tataatactc tatgattttt  
12781 tcttctaatt ctcatagct tgatgaattt tctactgctt tataaaaaata ctcagaaggc  
12841 ttaagattat ctacttgatt aagtcctatg ccaattaaaa tttttcata attaatgttt  
12901 ttattctttt tatattcttg gtattcttca tattccattc tcataacctca ttttttctta  
12961 atttattaat ttcttctctt ttagcaaatc ttttaattaat ttccccatgc ttgtatgatt  
13021 tttctcgcaa tgttctttta aagaattgta ttggctaact ttgaacgata tagtaaagtt  
13081 tttatttcct tcaaatctta tagttttgtt ttcttgcatt tctgcgctct tactaattga  
13141 attcaaaata tctctattaa ttgttttgc catttatatt ctttttatat tgtattgtat  
13201 tataaattaa attctttgaa taaagaattt aattcttctt tagctttcaa atcagaagca  
13261 ctttgctat cgacttccaa aattcctttt cttctgcaa gagaattttt gaaaataatt  
13321 ctatctctta tgatattttt agcaatagaa aaatgtttgc aattgtctat ttgagaggtt  
13381 atattgtcta ttatcaataa caattgtttt ttgttgattt gtttctaaaa aatcaattaa  
13441 agaattttca tttttgaaag aaataatttc aaaaggcgat aaccactta attttcta  
13501 tttgtttaga tttgttatgc tttttgtcc atctagatca atacaaaca aatctttttt  
13561 tttgtaattc caatagact aaaaaattaa agcataaagt tgttttacc acaccacctt  
13621 ttggatgaga gaatgaaata ataggcattt actatcctta tattataata caatatatta  
13681 caatacaata tattatattg tattgtaata tagttaatga aaaaaatatt tctttttaag  
13741 ttttagagtat ttttctttga aacttaaagt aatggtaaaa taggaattta attatttaag  
13801 tttttgattt tcttaaaaaa ttaatttgta tagatttaga taaggtaaaa ttatatttta  
13861 ttggaattag tgtataatat tgtaataaat aaaaattttt aaaaggtaaa aaaatgaata  
13921 aagataaaaa atatttaaat ttttctgaat attatgaggt tagggatttt ttagagcttt  
13981 accctgaaaa agatagagaa aatatagaga atattttaat gacgataggc gaaaataaaa  
14041 agtcaaaaaa tttatctttt gaatttttat acgatttttt taaagaatta ggttttgaaa  
14101 aaagttgata tagatgattt gctataacaa atcatcttc ttgatattct ttccaaattt  
14161 agcatcaa atcttttttg attttgtgtt aatcttttagc ttgataggtt ctttattttt  
14221 cagaactaaa gattgaagtt gattatcttc ttgtattgtt tcttttatct tgattttgtt  
14281 tttaaattca tcattgaaat atttattgaa ttgtttataa gtcattttta agtttttttc  
14341 ttttaaagcc ttatcataaa gaaatttaga tactacacag ccattttcaa attctttttt  
14401 taaatagttt atatttgaat aaaattcgat tttagcttca cctctttgca ttatatatcc  
14461 tttcttaaat agatttttct aatatcataa attcatattg gtttgttttt tcttttttag  
14521 ataattcttg gtagcctaaa tgtttaaaaa ttttaatagc ttgctgggaa tagtttatat  
14581 cacatctagc aattattttt ttgttgggaa taagtttttc ataataatta ataaaatttg  
14641 tagctaactt tttgtttcta aatttttcca agatatagat catattttatt tcatatata  
14701 ttgatccttt gctttttcca caaatgcca aacctgcttt ttcatattgta ccatctttaa  
14761 taataaaaaat tcctcctgat acaccattat tttttattat atcttcta at tttcaataa  
14821 atcttacatt gtaaaaatgt ttttctttga atcctagcaa aaaacaatat tttataaatt  
14881 ctatatcttc aatgttgca atttttatat ccatgattgt tctcctatat tctatttgta  
14941 ttttttcatt ataggatatt ttaggttaat ttgagtttat ttaggttatt ttaggtaaag  
15001 ttagttttat tacaatagaa ttacctaaat ttagttataa ttacttggag taataagaca  
15061 ggatagcaa atgtcgaaca tttgcaaagt tttatcgcta aagctctaaa ataaggacgc  
15121 caaatgagaa aagataaaag aatagcaata agattatctg aagatgagta taaacatata  
15181 atgcaaaaag cacaaaatca cggcttaacg atttcaagat atttgctgta tttatcgatg  
15241 aattatccta ttacttgc atgtagatcaa aaagtcgcac ataattgtttt aaacattgct  
15301 ggagatatag gaagattagg cggacttttt aaacattggt tggttagaaa cgaagataat  
15361 aaagtcaatt tttcaacaa aagaacttat aatgatattg atgagattgt agatcaaatt  
15421 ttagatttac aaatactttt aaaagaacaa gccaaaagga taatacaaaa tgataatcaa  
15481 aaagattcca agcaaaaagc agaataaatc aagttttaaa aatttatcaa actatatttt  
15541 agacaaagac aataaatatg caaaagtatt ggttgattat atgcttgata aaaacaatga  
15601 aatggataaa gtggaaggtt atcattttac aaattgttct tttgataacg atgaagataa  
15661 tattaatgag attatcaata ctcaaaagct taataccaca acaaaaacag ataaaacctt

15721 gcatttagta gtttcttttc aagaagatga aaaccctact ttagaaattht tacaagcaat  
15781 tgaagaagaa atcgcaaagt ctttaggaat ggaagatcat caaagattaa gcgtggttca  
15841 ttccaacaca aataatcttc acatacatat tgcaattaat aaagttaatc cgcatacact  
15901 aaaagttatt aatccttaca atgatgttag aatthttaca gaaacagcga tgaacttga  
15961 aaagaaatat aatthtgaagc tagacaatca tathttcaca aaagataagc aaagtaataa  
16021 atataatacc cacactatga attgtaattht tgaaacctgg gtaaaagaaa agctthtcta  
16081 acaagtagat cttatgttaa aagatgaaaa aactacttht aaagatatta aacaatthttht  
16141 agctgaatat gatcttgaat ttagagaaaag aagaaaaggt thtgttattg cttctaagag  
16201 tgaaaaaatta thtthtgaagg caagtagtat tcacaggggg thgtctaaac aagctthtga  
16261 gaaaagattht aaagaattag atthtaaaaca agaaaaagaa aatacgaaaa atattaaaga  
16321 agaaaaacac gaaataaaag aacaatatca gcgaccaaatht aaagaaactt ctaaaacatt  
16381 atgggaaaaag tathhtaagaa ttgaaaatga gaaaaagca gagcttgaca aagaacttag  
16441 aatgttaaag cttaggcgaa atgaatthta aacttcaata ccatcaatga aatthtaataa  
16501 aaataccttht gcacatgtta aaaaccaaag aatgathhtht aaaaataaac aaaaagagct  
16561 ttatcaaaaa tataaaagag tgtcttatag agathhthhtht attagtgaat ctttatcagg  
16621 aaacgaagag gctacaaggg cthtgcgaag aactaaaacg aaaatcaatg aaaatgaaaa  
16681 tactctatca tcaaccagg aaaaacctaa aatathhthgaa aatgtagatt atatacaaaa  
16741 agaaggtht gctgtatata aaagcggtht taataaagcc atagataaag gagaaatgct  
16801 aaaagtatct cttatcaatg ataaagatga taaagaattht cthhthaaatht cthtgcctat  
16861 agcaattgat agattcggaa atcatcttaa tattacagga gatgataaatht ttaaaagaaa  
16921 tathhthtagaa gtcgcaaatht attataattht aaatgtaagt thhthcagatc agagaatgca  
16981 aaagatacaa gaagaaaaaca ataacaagcg taaagaatht gaaaactagaa aggtthhthaa  
17041 aaatathhtht gaathhthaaa tcaaaactcac agaacaggat aaagatatag atgaaaatatht  
17101 taaagaaaaa gaathhthgaa cthhthaaatht thcacththaa aaaatathca actctacacc  
17161 thcaatathhtht aaaggcagc tgaaaaaatht aggtthhthtagc tataaagaaa tagattccat  
17221 ggatactgaa agtghhthhtht ttgaaathhtht cggctthhtht gtaathhthctg ccaataaaga  
17281 aggacttht gcaatgaatg aagaaathhtht acaaaccttg atcgatgatg aagagataaa  
17341 aaggthhthgaa aaathhthgaa atthhthhtht aaatactaat aaaaataacag atathhthgcaa  
17401 gggathhthhtht acaaatagaa aaathhthgatgc tgatgagat ataaaaagat thhthcaatgca  
17461 agaaagcaaa atthaataagg tggcaaacgc tathhthctatg ttaagcgata agaathhthgaa  
17521 cataatggaa aagtatgcaa aaaaacttga aaaagathhtht aaathatcaat acttgaaaaa  
17581 ggtggaagta attgaaagta atgatathhtht thhthgaaatht thhthaatathc ataathhtht  
17641 tathhthtagata thhthaaatht gthhthathhtht tatathhthhtht atgtatgcta aataaataaa  
17701 atathhthctaca atthhthaaaac cacaactata tghhthaaaaa atthhthaatathc aaaaagthhthgc  
17761 caactghhthhtht taagaathhthgc aatgtgagaa tacaathhthgaa atathhthgthhtht taaathhthatht  
17821 attataaaaa thhthaaathhtht acatathhtht thhthataathhtht tactcctthhtht gcaathhthhtht  
17881 thctaaaathhtht atathhthgtca tathhthatghhtht aggtghhthhtht thgaaaccta thhthhthhthtata  
17941 tccaagthhthhtht tcaaaaaaaa taathhthctthhtht cthhthgaaathhtht thhthhthhthcgc atctagctaa  
18001 tathhthhthattg taathhthctghhtht cthhthhthctata athhthagathhtht atagcagaac caathhthctthhtht  
18061 atthhthctaaatht thctthhthgthhtht tataaagaac atthhthhthhtht aathhthctataga gthhthhthgathhtht  
18121 gthhthhthgathhtht thhthataathhtht aathhthctata gtagtgcaathhtht aathhthgathhthhtht ctathhthgathhtht  
18181 tcctathhthgga acagthhthhtht aathhthhthtataa aathhthhthhtht aaagathhthhtht cthhthhthgctaa aggtagthhtht  
18241 tactthhthhthct atathhthhthctt thgaaathhtht tataaagthhtht ccatghhthhthgaa thhthctatc  
18301 aathhthcaccac atthhthgaaathhtht ctathhthctthhtht atghhthcagca atathhthgathhtht thhthtagaaga  
18361 thhthhthhthhtht thhthaaathhthgc tagthhthathhtht gthhthgaaathhtht tgctthhthaatca tathhthctthhtht  
18421 atgaathhthhtht aathhthtagccaa cgcathhthgcaa tatathhthctaa tccaataata thhthhthhthtata  
18481 thhthgthhthcgaag aaaaathhthatta athhthacataathhtht thhthctathhtht caaagathhthcgc aathhthctatac  
18541 atataactathhtht tgaagthhthata atthhthgathhtht aaccaathhtht aathhthcathhtht gthhthathhthhtht  
18601 aathhthathhtht agcaagthhtht tghhthhthctthhtht ccgctathhthhtht thhthhthhthtataa thhthcagctghhtht  
18661 thctathhthhtht atcactathhtht aathhthhthctcathhtht cactathhthhtht atthhthhthhthtca gthhthcactathhtht  
18721 thhthgathhthctthhtht thhthgathhthctthhtht athhthhthhthtca thhthhthhthhtht thhthcagthhthhthtca ctathhthhthgathhtht  
18781 cthhthhthgctthhtht atthhthhthcathhtht thhthhthhthctthhtht actataaaaa thhthhthhthtataa thhthctatgctthhtht  
18841 aathhthhthhtht gathhthhthctthhtht thhthcghhthhtht actathhthcathhtht gathhthgathhthctthhtht thhthgathhthhtht  
18901 tathhthhthhtht aathhthhthcagc cactthhthhtht accaagthhthhtht thhthhthhthtataa thhthhthgathhtht

18961 ttccattggt tctctatcat cttttatatac attatgatata tgatcgaggt cgatatatatt  
19021 ttcaatccca ttttttccag aaccttgaag ttctaaatat aactcaagat ttactggccc  
19081 aatggccat gcttgaatc catcttttac taatgggcgt ttaaaaatga ctaatgtaac  
19141 tgcattgtga aaatatatta atttttgtaa ttgcatatga gtttagcgtt tattatcttt  
19201 ttgtgccaaa cgaataaatt cttttgcaat tgcttttgat gaatataatt tactatTTTT  
19261 ttccatgata aactaccaat ttattaatgt ttatactata atactataat ttagtatata  
19321 ttgtactaaa ttatagaat ttttatagaa aaggatttaa aatgggattg aaaccaggtc  
19381 caaacgcac cgcaaatct actggagaac ttgatcaaag acaaagagac aataaaaata  
19441 ctccaggaaa tacatcaaaa ttaaaacct ctaaaagttc taagaaataa catctatggt  
19501 ttaaactagg aatggagtta ttcctagttt aatatgataa aagatttgta aaagtattaa  
19561 acaagtatta aaataaacta attttgata gaatatcaat cttttctaaa aatcttaaat  
19621 ctacataag aatttaagct taagcccatt gaatgagcct cttgatttaa aatttggtat  
19681 tcttctctg tgaattttat cataagcttt ttatttcttt ttgcatttcc tgtttttgca  
19741 tttcctggtt ctccacgagc agaattaaca aaatcatttt cttttttgg tgcctctgaa  
19801 cttagttttt taaatcccat tattatactc ctaatttttc atttgctatt tttaaaagtt  
19861 cttggtaaaa gttttcaaag tcatttaaag ctttgtcgtt tttatcgcaa aattctttca  
19921 tgcttttacc ttctattact gctttgcgat aagcttgtct ttcatagatt acgctttcaa  
19981 gcattattac tctatctaag cccttttctt ttttagcttc gttaatgtat tcttttaaat  
20041 tttctaattc ttttgctaaa aaaggattag gtgaaaccct attgactaaa accaaagcca  
20101 ataaattagg attaatttca atcacttcat tataaatttc tagcatatga tctagcacat  
20161 taacatcgta ttgacttggga attgtaggaa tgataatgat atttgatgaa agtatagcct  
20221 ttcgcatttc tttactatcc ctaccacctg tatcaactat aatgctatca aaagcatttt  
20281 tcattctttt aatctcatcg cctaaactaa caccagtttt tgaaacattt gaaaataaag  
20341 gctctaaatt tgattgactt ctcatatccg aaaaaacttc agtcgatttt tgcggatctg  
20401 catcaataag taaaacattg tctccatctt cggctaactt tgcggaaaga tttactgcta  
20461 atgtagtttt accactcccg ctttttcat ttactacgga tataatcata ataaaacctt  
20521 gtttttagtt taaattaaaa taatatcata ataatatcat aataatatta atacaatatt  
20581 aaaagaataa taaaataata ttatattatg atacctatga ttaaaccaac aagaagaaaa  
20641 ataatttggc tagcaatagc gataatcaa aaattaatat ttgtatTTTT ctttctttg  
20701 gtgtcttctg tttttcttg tgatggctta attgtatttt gatttgcttg tacttgtgtt  
20761 ataatatctt ttaatgcttc ttggttgctt ttactatatt ctcttatttc gttaaatata  
20821 ttaaatttat aactttctaa atccgttttg tattttgtaa aaagtagatc tattttttct  
20881 aaaaaatcat caagataat ttcatttgca ctaacgactg caagtatagg atcattttca  
20941 tctaagatta tatggtgctt ttttgcaatt tcttcaataa gttctttttt attcatttta  
21001 tttttccttt tatgatatta ttttgatatt aaataattaa ttttttaata ttatactaat  
21061 attaaaatga tatcatcaat ttaacttttt ttacttcatt ttggagtata ttaacaactc  
21121 caaaatacct actatcataa ctttttatat tttcgcccat tacaaaaagt tcattttctt  
21181 ttaatttgcg tttaaaaggt ttaaattcta gtaaattacc ttcgctatca aatgaaaaaa  
21241 ttttagaatt aggcaaaaga ctttcattaa taaaaacacc ttgcgtatta acttctacaa  
21301 aatcgccact tactgcgata atctttttta ataaaatttc tttcttttgt ggtattttta  
21361 aaagcacaat atcgtttttg ttaaaagtgg aagagttaat ctctttgtat aatcctaaag  
21421 gcatcgatct tgtataatta aaatgaaaac cgccaaaata aaaaataaga tatgagagta  
21481 tagaaataaa agcaaaagaa aaggcaataa ttgcaatagt ttttctcata gcattacaat  
21541 gatattcctt tattttgctc taaatctaag ttttgtctaa agcttttttag attggtttta  
21601 attatggcct caagttttcc taatttcaat tgtgaagctt ctacagatgc cattatcgtt  
21661 ttatcttttg gtattaaatt taaatcaagt ttataacctg cttttttagc caactcattt  
21721 aaaaatattc tttgagttct gccgttacct tctctaaagg ggtgcaaagc attttagattt  
21781 ctagcaaat cggctaagtt ctttgcgaaa tcgttaagat cttttgaatt ttttaagtaa  
21841 ttgtcttctt taagccaagt aaaaatttgt tgagcggttg cttttaaadc ttttcagga  
21901 acaaaattag taattgttcc atttggtgca tattttccaa aatttccatg taaacctact  
21961 tccattctat cttttccagc ccagtgaat acatcttgaa aaatatattt atgtatatatt  
22021 ttcaaatgct gataatcaaa attgccttta atgggatttt tgcttaattc caaggctttt  
22081 gcgttgggta tatctctttc tttgcgaaat aattcatcta atgattttgc acctatttta  
22141 ttagtcttga ttaaaaattt atcaaacctc gataaatttt cttgagaatc ccacattaag



22201 atatcccca ttctttttta tattcagtga tgatttcatt agctgttgct tcgcctttta  
22261 taattttaat attatcaatg atatttcctt catttaaaaa catatcttct attgcaaaat  
22321 tacctatatt tgatcttata gcttcgtatt gctctttagt taaatcatct ttatatTTTT  
22381 gaagtatcgc aaggctttct tctaaactat gcacttcggg atattgtttt tgcattttta  
22441 ctcttttata aaaaatataa ttatattata ataataatata aatagaatta aattaatc  
22501 ataatgatata cataatgata ttaattttata atatattacc tatttgacta aacgctttat  
22561 ctttgaaaat tttaagcctt tgttttgaca tttagagaaaa gctttttatct tgcatagcctt  
22621 caccaaaagt taaattcctt gaagtgagtt ctaaaagatc tttgccgaaa gtatctttac  
22681 ttaaaagcatt aagatagaca atagctttga ttttttctt gatagcttga tactcttttag  
22741 tttcttcaaa ttctaaatta tctttgataa ttgatccgtg atattcatta atccacacca  
22801 caaagaaca attaaaagct tctgttagtt gtgttaatcc caaaatggta tcatctcttg  
22861 cttgaccacc tacaattgga acatgcatat aaacttctaa attattgttt gttaaaaagt  
22921 ctaaaacctc attttcttta agataatcaa ttaaaggatata aaaagtagtc gcaccgctat  
22981 caataatata gttttcagcc tttttttcaa aagctaattc tacaatttta tcaaaagcac  
23041 ggacatcaaa tttgccatca tcatcaataa gttgcaagaa ttttagctttt aaggctttta  
23101 cattaagtaa agttgtattg ttaggatcag tatcaatagc aacgatactt tctctttat  
23161 ctaaaaaata ttgacatagt aaagagctta taaagctttt tcctatacca cttttaccat  
23221 ttaaaacaaa atgtatTTTT gccattttta ctcttttata aaatatcgct gacttgttta  
23281 tctagtgtta cttttgatct tgctaaaaat gcgggatctt taaagtataa aatttgTTTT  
23341 ccataaatag gtgcttgacc tgctataaaa attaacatat caccaggagc gattatcttg  
23401 tcatctttat cttttttagc tgaaggcaat cgcatacact catcagcagt aattaaaggg  
23461 cgttgcactt cttgtatagt ttcactaaca ttgccaagca ttacagcggg tctttttcca  
23521 gagcttgtga tagattTTTT aacaatagtt gtgattccgc ccatttcaga taagagTTTT  
23581 gcagtttcga ttttatttgg tgcaaatgct attcttatgt ggcagttcga aataattgtt  
23641 tctttttcgc cataaataga ataaagctgt tgtatatctt ggatcgacc gtaaaacttc  
23701 attccatcct ctgccatata agcaagattt tcttcaagca ctctcaattt tccaaacata  
23761 gttagctcat cagctaagac tagcatttta tgtttatacc ttttcacatt ttctccattt  
23821 ttaaaattta gagaatcctc agttaaagtt ctaaaaattt gattaatgag taaattaa  
23881 aatggacgca acctatcttt ttgccctggc ggaatgatta aataaagact gatagggctt  
23941 tcatgattca ttaaactctt gattttaaaa tcgctttttg ctgtatTTTT tgctaagata  
24001 ggatcaatat aaagatttaa agcttccgaa gctgttccta ctacaccgct taattcttgt  
24061 gtggctttat ttttcattga tcttgaaatg ctttgaataa tttcttgtgt atttttatcc  
24121 attgtagaaa tatcacattc aaccatttct tctaatagct catcgatact ttgatttggga  
24181 cattgataa atttataaat atcggttga tttggggat tttcgcctcg atattttttt  
24241 aagtgtaaag cataaagtat aattgaaact aagaaatttc cgcctcact tttaaaataa  
24301 gatgtgctac cttgagtggg attggtagg ggcgtttcgc ctttgaaaat gagattaatt  
24361 gcaatatttt gagtgccttt aatctcgtgc attgtttcta gtcttatttc ttctaaaata  
24421 ttaaaattta cggcactatc atctaaacaa gtcggatcta attttaatac tttatttttg  
24481 gcgtattttt gtcgccaacc cgcagttaaa gcccatagct caccttttgt atcaaaaata  
24541 agtgcagact cttcccagga taaaagtgtta ggtaaaagta agcttacgcc tttaccgctt  
24601 cttgtaggtg caaaaagcat tacatgttca ggacatcat gtcgtaata atgaagtgtt  
24661 tttttgtgtt caaaaccacc gatatacacg cttttatctt tatcaaatac gccactttct  
24721 ttaacttctt ctaaagtagc ccaatgtgct gatccatgaa gattttctat tgcttttgcc  
24781 ttacgcaaaa aggcaagttt caccaaaata aaaacaataa acaaaaatgc aatacctgca  
24841 agcattacca tgaagaattt tttgaaaaaa tcaggataaa aagaataata agcataactc  
24901 caagaaatcc acttaaaagg attataaaat ccataaagta aagtttcacc taaactagga  
24961 gagtaattaa aagattttgc caaatattga gttgcaattt ggctaataat agtaaatgtt  
25021 aggaaaattc ctataagtcc taatatataa actaaagctt gattagtttg tttttcata  
25081 aagaaatccc tatatctttt cttagctgtta tctctttatt gatgccttta tttttattta  
25141 gtgctttagt agtggctttt tcaaccatta gttgctttgc aatttgttct ttttaattgt  
25201 ttttaatttc ttccaatcct ctgcttttca ttaaactggt aaaatcactt aaacctttct  
25261 gcgcttcttg atttgtaaaa tttggtaata caacttttac ttcgggatata ttttttgta  
25321 tgcctaaggc tgtttctttg cctacattct tattgccgtt taattctttt tttacatcat  
25381 tatccccctgc aataatgata ttcatttttag ggtatttttc ttttatattt gttacgataa

25441 tttctaaatt tccagcatct actcccatta tagtaggaga tttttagct tcatagacac  
25501 tagcacttgt cgcaaactct tcacaaatat aaacttcatt gacattatnt aaattctttg  
25561 caccaagtaa gaaaaaatta ccttgctttt tcgcagggtta ttctatgcc tgctcttttt  
25621 cttctgctgt gcgtgtagct cctatcattt tatcaccatt agcgaagatt ctttgcgtag  
25681 cccaatatnt gccttcaata tctcttaaag gaatcaataa gttgccgttt ttgtcttgtt  
25741 tgagataaaa atttttatca aagccttttt cttttaaata cgggtgttct gaattagccc  
25801 atcttgcaat gttgtattca ttttctaatt tcacagcggg attttcatac gcttgattta  
25861 attctttatc tctttgctct ttttaaggctt tattatgttc taaagcgttt tgcagattta  
25921 tttctttatt tttgggtgtt tccaaagaat tagcactttt ccaatnttct ttaatgccag  
25981 ttttgtaatt ttgcacaaat cctgcagggt gtccatttaa aaaacctaca taagctccgc  
26041 ttttttctct ccctttatcc cctataacgc taactctatg aagtttgccg tccattatag  
26101 gctgaccttc aatattaagc tcatatnttt ctaaaaaagc tttaaattca tcatgagtat  
26161 tgttgtaact ttgtgttaat ggtgattgat ttagccattg agtgaaatnt tttaaatccg  
26221 cacccttagg agcataccac attttagctt ctttatccca ttttgcacct gctnttttag  
26281 caaattcttt ttctctgaaa ggaacatata agtaagtttt tctagttgcc aagtttaact  
26341 ccttatcttg ttttaagcgt tgattttgag tatttgaatt ttcaagctct atttttgtt  
26401 tttgctccaa agaaagactt tcaagaaaat taacaatntt ggtagcgtct gaagtggctt  
26461 taaaaatntc atttggctta tcttctaaaa tttgcacca actatcaata tatgataagt  
26521 gttgtcctgg atcataatct aagcctatnt taccattaaa tagaaaactt gcaatntcgg  
26581 ctcttaattc ttctttggcg tattcttttag aaccaaagg gttntttaaa tctctatnta  
26641 atcgactntc atgaccgctc caatgtacta atctatgcaa agcagttgta tagtaagcgc  
26701 cttcactnta aaaatnttct ttcgggggta gtgtaatagt atcatttgcg gcattataaa  
26761 aagctctatt tcctttgtga tgaataattg cttttgaatc atctaaaatt ttttgcgctt  
26821 ctttaattat ttgaaaatta tcaatctctt gcttttgctc caatnttggc atatnttcca  
26881 tttgctcggc attaaaaaca taagcgaaaa atactnttagg attctctaant tttacttcca  
26941 tttgttctac ttctccgttt tcatttgtaa taacattacc ttcctcatct aatntatcaa  
27001 ccattntcgt aaattgccaat tattgaatca aagtcgattt ttcacctntt ctaacttgtg  
27061 cattaatact ttgtgcttgt ttataagtaa gccacctagg atcattataa tttttagca  
27121 ttaaattaat gctatnttat cgttataag gcttatttgt aatcgggnta taaggcatat  
27181 tgttagctag atcaatacct ttccaaggnt taatccatgg tgcagntcca tntnttaagc  
27241 tttctatgat tttatcggct gtttcttnta tgaatcctt atntntcatg aaattatcct  
27301 tgatcttctg tgccttcttt ggcatcatct tcgcttaagg cattntcttt aaatgcacct  
27361 aattcttcag cagttaatgg atcaacctca tagctgaaat ttggatntgt ttctagntct  
27421 ttaaaatcct tcataatntt ctccttcttc aatattaggnt attgnttntt tttctntttt  
27481 tgggtnttca aaatctatct cttntgctntt tattcggntg tttgagtaa tntntccttc  
27541 atgctcccaa gtgtcttntg ttagntctcc aaccacatca actgaaatgc cttntnttaa  
27601 atatgggntc atggcattag caaaagaacc aaaaagagat actntgatat aagntgaatt  
27661 ttctatctct ttgtatnttc tgtnttntgc taaggntaaag gtgcatatga tactacctg  
27721 attacaatgt ctttaattcag catcagctgt taatcttccg cctattntaa tattattaat  
27781 cattatcttg ctctcatct tctaagntat caaataagct tggctcatta tcatcaaat  
27841 gtgtagntt atnttcttcc aaatnttcat tntccatntt tactcctntt tttgnttntg  
27901 caaattgaaa agattntaag taatcttaant tctntgtntct gattntctnt cttnttcttc  
27961 caagntcatct atcgtntntg ctgntntaatc gntnttagct acatagccat tagaaaatcc  
28021 tntntntaaa tcccagntat tataaatact taaagcctga tntatacgat cttctntcgc  
28081 tagatntnta tntntcattt catacgccea ataaaaata tcaactaccg cttntaatat  
28141 tttacaagta tctaataaat cttctacgct gntaatntgag aatntntaag atntaagatt  
28201 gntagaatta aatntcatta gtccaatatc tactatata cccctntaa tgaatntgtt  
28261 cgctaaatnt tcagcttctt tnttatnttt taatataaaa gagccaacct tattaatntt  
28321 aatntcaaat tntntgattnt tntnttctac tntgaataatc tntntntatga tntntnttnt  
28381 tacatntnta tntntntcatt gntcaatntag agcaatntca atcattatnt aactcceaag  
28441 gctctaaaat aatntcctta gntcaaaaga tntntaatnt atatccagga cgaatntnta  
28501 aagntagntc gatntcata tntnttctta tcatctcgtc tgcgactntga cccatntntt  
28561 gaatagctnt tntcagntnt tntntcgaag cagntntctt tntcgtntnt gntntntaant  
28621 tatcagacaa cgaatacct cgcntntcgc atgaaagnta aaaagcagag ccgaaaatcc

28681 taaaataatg attatccact tgatcttcaa agcctgtata tccatcttgt gaagttcctt  
28741 gcatgccatc aagatttaag gtatccacat tcggaaaaat aagcttattc catgctacta  
28801 agagtcttga ttgaccataa ataataattac ttgaataagc tcctacaact ttagttcctt  
28861 gtggaattaa aaggatTTTT ccagttgCGC tatcataaac attttTgtTt actTgtgcca  
28921 atatttgacc aggtaaattc gaattaacac ctgtaattaa aatggcaggt atattccaac  
28981 ccgctttaat ttcataagtG cttaatggTt tttgttttac atattttaaa tagccattgt  
29041 cttttttttg agataaaaaat tgttgccctt gcacatcttt gtttTgtgcca ctttctaagc  
29101 ccagtcctgt attttTgtgga ttaattgctc caagattaat atcttcatta ttattaggtg  
29161 gattgaaatt aattgcttgg tttttttTgc tatccgtTgc ttctgtttTg atatcaagct  
29221 tggTattgct taataaagct ttttaactgca tatctttttt aatcttcatt tctttttcat  
29281 ctatagcatt gttttggaca aggacaggag tattgttagg tggctgtTgt gtagttTtag  
29341 aatttTgttTc ttgaataggt tgtTgtgtgg cattTggcat aggtggTgaa attatattat  
29401 tttctTgtgc tttttgaact tgtaattcgt caatatataa attaagatca ttgttatgat  
29461 ttgtagctat ttgtgtttcc tctttTggTg tggttTgcgc agttTgtctt tctaaatttt  
29521 gctttctTga taaggctaca taaaatatgc taaataatac tattgCgatg attgcaaata  
29581 ttattataat aggaactttc gaaagccttt tgttattttt tggtaaaaaat ttgttaggag  
29641 acatattcac ttcaagcata atttaacctt tagttttTgg agtaaaaatta aaactTgtta  
29701 tatttggTtt tacaagttta ttttcgatga ttttataaat cacattgatt ttactttcat  
29761 tgatattaaa tatcgcaact atattttcat tatcaattTg tgaattTga tagcttaaga  
29821 aggttaaattc ttttttagaa ttgtcattgc ttattgcata accttttttt cttaaaggTat  
29881 tgataaaaata gttagaaaaa tcttgattat ttttatcttc attgataaaa aatgtagTtt  
29941 tgttaggtgc gtaatatgaa ataatgaact gcgaaaaatc gtctgcaatt ttattgtagt  
30001 ttattttTgt ttcttcaact gcaaagctag agttaaaata atccgaattc attttagcac  
30061 acgaggttat aaagaaagcg attaacgcca aaaataaaat tttcattTgt tttccttttt  
30121 attttggagt gataagctat aaagcacatt attaaactata tcttgattag ctttTgtTga  
30181 atgctttTgt attttaattt tttctTgttt tgagcctaca tttgaaagta aaatcgcttt  
30241 gttaaaaagc ctatctacaa taaaagtatc atatttcaag cgataattta cgattTgttt  
30301 ttcattacta gaatctaaaa tcataagcgc aggtgcttca tagaattttt aattttttTgg  
30361 catttgaata taagtttttt tgccatcatt gtaaattctt aaaggtttta aaggtgcatt  
30421 accttctaca ctatagccaa agtccaaatt ttcaatattg ctcggaattt catcatcttt  
30481 tgttttatag aaatttttag attctgattt tgctttcatt tgattttttat aatcttcaag  
30541 agtttttatg atactattTg gataattaaa tgaaaccgca ggcataaatt tcttagcttc  
30601 tgatattaaa ttttaagcga aaactcgctt atttgtcatg atattcatag ttgtttgtaa  
30661 gtttttatcg gtaggcttaa tgatgatag agagattaaa taaggctctt caccacttac  
30721 gcttaatgaa acagcccatc ttatactatc gcctattTgc acatctttta tcacttcacc  
30781 aggttctaaa gcaatatcag taagtcttaa gggTgcggTt acaatactTg gcattgattc  
30841 accaaaaaga aaaattactt ctccattatt tcctTgtata gtagtagTtt ttgaatttat  
30901 ccattttTgt gctattgcta gatctttttt ttctttTggT gtaagattTg aaaaatctct  
30961 ttcgtttaga ttgttagcgt atgcactact accaataaat aaaagtaaag acgcaattaa  
31021 agaaagtttt ttgagttttt gagtataatt tttTggggTg tttgccacaa ggTtgcacc  
31081 cttgtggcga aatctaagc ccctaaagga gctaagatga ataccactaa attcatcata  
31141 gttgtaatta tactcctTg tatagttaca gtcaaggctt attagcctTg cccactTgt  
31201 tggggTgtgg tggatttccc ttgtggctgt atttgtatta gaaataaact tttcatata  
31261 ttttaactcct tataaaattt ttgcaaaatt aatatcagTg atgaaaatcc ctaaaggatt  
31321 ttttaaaatt tgttcttctg tattTggaat gattTgtttt attcggatta atcctcgata  
31381 agtttcttta gaaagaatat ctTcatttaa atttgtagTc gtctcttccc attcaactTg  
31441 ccaagtgtca atattttTgt gaacgatatt ttttaatttc actcgacat tttcctTgt  
31501 agctcgTgtg aaaggattgt tttttTgaaa ttctgaattt aaataattaa atgctttTga  
31561 tctTggctct acataagcat aggcataaaa tatgaatttt cttTgagTtt cggcattTcc  
31621 ccaaaccgaa cgccaagaat aaataaaagt atttaggcta tactttatga cattTggatt  
31681 ttttaagtCg atattttgca ccattcctac tttagctgta ttgcctaact tatcaacttc  
31741 aataacataa gggataagct tgtttTgaga gccgatatag cctataaaga gaacacatac  
31801 aaagcacatg gctaaactaa ttatcgctac cattTgccag ttttttagcac gagTgatata  
31861 atcaccgtat ctttctagcc attcggTttt tgcattaaaga taaggattgc ttgaagtGtc

31921 aaactcattc ttttctatct tttgcttttg ctaaaaaata ttcattatth ttttttactc  
31981 cttttatgat ataattaatt tatccatttg gtagatggac tgtaactcta aaggtttcac  
32041 aacctgttta tttggtttaa gctcggttct cttatgagaa atcgagcttt ttttttggtc  
32101 atttggctgg gtgtgcgggt ggaaaccaa taagtaggag tccataatgg aactttttaa  
32161 tcttttcatt gcggttaatt cagtagtaat tacacttttt agagaagaaa taagaaaaat  
32221 cttttttaag tctaaaaagt aaattatcgc cgtttgtgaa acgctaattg aaggacttac  
32281 cacccttgca ttggttttat tattccatag catcgggatt tattcctgat tgatagtttt  
32341 cttgttttgg tgatcctgat gatatgccgc cttcacttgt ttttccttgt atatctttaa  
32401 gtttttcttg taagcgatta gccatttggg ttggcattct accttttgta agattatccc  
32461 ttaaatgttc gccccctgca cctgctagat tttttgccac acctttaacc aagtccattc  
32521 caccggctcc accttctgct aatgcaagg ctttagctgc attcatagca cgagtaatgc  
32581 cgacagctcc tgcagctgca cctgccgcag cacctgctgc catggtagca accgcctaa  
32641 agcctgccgc agtgcctgca ctttctccga tactaccatt aaatacggct tcaataatac  
32701 caggaacat ttttgtaatc atgcagaaga ttaaagcggg aacaagaatt cctaagtta  
32761 tttcgttaagt tttttttga tccatttcat tatagattht tccaataatt gttatagata  
32821 gtgccattaa tccttgtatc ataaagagtt ctacaccac tttaatggct gtcattatgg  
32881 gatttaagcc tttttgttta aatgattha aaccgctta cgccaaagca aaaaatacaa  
32941 ttacattcat taagaaaaat ttgagataga caataagtaa atccacagcc attaacacaa  
33001 aagcaattag tataataacg ccacagataa ctttaaaaaa gctttctcct ggacttgta  
33061 cactcataga actaagaata atcataacta ttttaaaagc attttgaata atattactag  
33121 gtgaaatthc caatccacca tttacatttg tagctaattg tgaaaaacta ttaaaaaata  
33181 tttgtaacca ttgatcgata ttaataaaaa ataggaatat gcctacatac attatthttt  
33241 taataagagt ggctaaaaac tctccaaatt caaaaccgct caaagcttht aaaccaaag  
33301 tccaaatcaa atcaatagca actaaagtcc aaaacacca taaacaagcg gtttaataa  
33361 gaggcgtcca agataaaaagc ccattgcgta ttatgctta aacgccttct gcactthcaa  
33421 ccccaaaagc taaatttggg gcaagaaaaa ttaaaaaaat aatcgctagt ttatthccat  
33481 ttaagagcgt ctttgttgta atthtcattt tttccaattc cgtaaggac acgattgtcg  
33541 gtttgcattt caactgccc a ttttgcatta gagcaatcc tttgttgagt ttcattcatt  
33601 thctccattt ttttacattc tgcaactcta gcctthgctt cctctaagtg cgctthataa  
33661 taatcgcttg ttttgcctc atcgccacaa cctgctaaaa aagccaaagc acctaaaccg  
33721 attaatccgc taaaaataaa atgtthcatt gttthtctc ttgtthtaaa tatagaaaca  
33781 aataththta acataththt atthccattt aagagcgtct ttgttgtaat tthcaththt  
33841 tccaattccg taaggaacac gattgtcggg ttctaattgt ttattgattt ttgcttgthc  
33901 caaacattt ttgttathth gcgacgctaa ataattagta agcatattgc tthgatccat  
33961 gataaccgat cttagththt ttatctcatc aatctgataa gctaaaagat cattggtggc  
34021 ttgcacagcc tgcaaathth cattagaatt ttgtgaattt tgcttaagt ttgagataag  
34081 cgcactthca cthtctaagt cttgatatcg aagctcgagt gtttgcaatg thccgtthaa  
34141 tgtaththtg tttgtthtcc caathtgctt gtatctatca gaataaatht taththctct  
34201 gctthcattt gttgcgthth caagatcatt actataacct tcaaatctt tgtaagtatc  
34261 thcaaathth cgcgaaacat tacctatatc ataagaaatt ccaththact thgttcattac  
34321 atthcgggtt tgataaagaa ccgtthcctaa gttatcccaa thctthttag thaatctthc  
34381 taaathctgt tthtgcaatt gcaccathth tatttgctgt tgcaattgag aatacaththg  
34441 ctctgattgc tgaagttgca ttgcataatc thttacttga ttggcaatag cgctaacatc  
34501 aataacagga ataccacctg caaaggcatt atthgthctt atgagtaaag ttgtagctat  
34561 tgctagagta gctthththta cgccaaataa tgathththt atththgtata thththgaagt  
34621 ttaagtaggt thtagthtaga ataccatta agggthtagc gtaggtctga cccctatgg  
34681 ctaaaththta cccgtgaaag tgggtgattt tatgtccatg atthgaccg taatcaththg  
34741 tattatacta ttatgtataa taatagtcaa ggctthattag cththgccta cthththggg  
34801 ttatgcggta acctacctc taaactthta cthctcttht cththaaath ththaatgtht  
34861 atththgtat gccaaaaath aaaaththcat atthaatctt thactththaa atthaththt  
34921 ththctgatat gagaththatt gctththtat atthctthth ththcatatg gaththgctct  
34981 tcaaththcac aaththcatt thththcggth tgcaaththc thththaaath atththctthta  
35041 taaggtgtat ththgaaath ataththatta thathththta gthththggtg thththgathth  
35101 ttaathathth ththccathth atthaaagca thththgaaag cgathththgaa thththgaaagct

```

35161 tttttgcctg taaagcccat tgctaaaaga aagaatccat cttttgtaag ttgatagtaa
35221 gggatatttc tttctctacc tttaaagcct tgtattttat ggactttgaa tgaagactca
35281 aaattgagca gataattgga agtccctatt tctcgcaaat catttaaaat gttttcgata
35341 tctcttagaa catttttatg ttgtttccca aaaaccttag ctacatctaa acttgtgcaa
35401 aaaacttggt cgtctttggt ttcaaaaata acttcttgat tgtttatggt gattatgctt
35461 gtattgctca tatctactcc ttttagtaag tccagcattc tttagtgaat ggtatttttt
35521 gataatagtc ataacaattc ctatctccgc aagttcgaga aatcatatat ctttgatcgt
35581 cagaaaggct ttcataagct tgttgagtta taagctgtaa ttttgcactt agtttccatt
35641 ctaaggaatt gtaaaattcc cctgtgcatt tatattttgg agttttataa tcggtataag
35701 catggttgat taatgcgtgg caaaagttag gcatatttgg attgattcta tagctcataa
35761 ttccaaaagt agaataactt cttttagttt ctacttgcgt gtttaaataa tttgggtgtgc
35821 attgcctagg atcacttaca ggtaatacat catcgactaa gttatttaac actaaatctt
35881 ctatgtttgc gtcattttgt atagggcata aatttaaaaa tgctcttctt gcattaatcg
35941 tttcccaagg ttttttaaat ttaatagaaa aataccttgc taaagaagat gaacactcgc
36001 tcgggcgtgt gccactactt aaacataaaa tcgcctcgca tgctaatttt gtatcgcttg
36061 ttaaaatata atcagcaaaa gcgttactac caataaataa aagtaaagac gcaattaaag
36121 aaagtttttt gagtttttga gtataatttt ttgggggttag ccatagggct gcaaccctgt
36181 ggctaaattt aacctcagaa aagaggtggt taaattgagt tacacaaatc tcatagttat
36241 aattatactc ctttgataaa ttatagtcaa ggcttttttag cttgcctca tttttatggg
36301 ggtgagattt ccctatggtt ttattaacac caaaaataaa attttccata ttaatccttt
36361 tactttaaaa ttaatttttt gttcgatatg agatttattg tctttatata tttctgtaat
36421 ttcatatgcg attagctcct caaattcaca attacgattt tgttcggttt gcataatcgc
36481 ttaataataa ttttctttat aaggtgtatt tggaatctta tttttattat aattttctag
36541 ttttgggtgt ttatcaaag aataataacc ttgctttcta atacttggtgta agacttcttt
36601 aataaccat tgtctaaaag gttttgcttt tggtttatcg cttctcatta ggacaaaata
36661 aagttcaggt tcatattata caataaattt ttgtattcca ccaagagttt taaaggggtg
36721 cactcaaaa acgccccctt tatcaaactc cttatttata gagtctctaa cgctatttgt
36781 ttttttaata ttaatatatt tacaacatc atttagacaa aataatggct cattattttt
36841 atctctaatt gttcttactt gtcccaattc tttattttca aataaaaataa ctttgctcat
36901 gctatctcct tgtagaatgt atttggaatc ttatatttat tataattttc tagttttggt
36961 gtgtattgat ttttaataat tctttccatt tcattaaaag cattaatgaa agcgattttg
37021 aattgtaaag cttttttgcc tgtaaagccc attgctaaaa gaaagaatcc atcttttgta
37081 agttgatagt a

```

//

```

LOCUS      OIDGCHHC_2              7365 bp    DNA        linear      12-APR-2021
DEFINITION Campylobacter species strain strain.
ACCESSION
VERSION
KEYWORDS   .
SOURCE     Campylobacter species
  ORGANISM Campylobacter species
            Unclassified.
COMMENT    Annotated using prokka 1.14.6 from
            https://github.com/tseemann/prokka.
FEATURES   Location/Qualifiers
  source    1..7365
            /organism="Campylobacter species"
            /mol_type="genomic DNA"
            /strain="strain"
  gene      complement(388..1674)
            /gene="trxB_1"
            /locus_tag="OIDGCHHC_00052"
  CDS       complement(388..1674)
            /gene="trxB_1"

```

```

/locus_tag="OIDGCHHC_00052"
/inference="ab initio prediction:Prodigal:002006"
/inference="similar to AA sequence:RefSeq:CKG86288.1"
/codon_start=1
/transl_table=11
/product="thioredoxin reductase"
/protein_id="Prokka:OIDGCHHC_00052"
/translation="MSETYEIYTPNGLILDVEKETNKILLSDGGAKVGKYTQEYSKAL
FEAHNIKQNSPYKDYQPRYLDPEFHTGQKSTLLEFKDWQSIYLDPIKGSIAPWTKAE
KAYNSLKTKKERYKYL VIRSGIRSVVIDIPYE AIGAVDEKGNVDPKYEELYRTVDDN
KHNLRSSLFHNEWGMAAGILGDYKYLANDMSQNGFNARFIQATILYIQLSGSSILDK
PNLLGAIYGYADIAVGSGLVGVHKNPLREQQIKTLAKTLKPDEFGMLPFIDEIMGVDW
VIDYNKYRIARDEFGSMYKALRSDVVEGKIKDPRDVDSTYESRREFDRHRGGYYNGMV
NGYGTDPNDWSEERAQLFNDTLILHAKLAALTPPQGYPNAPYYFTPENLEWYYKRHK
LDKLLDPRIPAIYRYNFPRELRAKILKFGEEGIKE"
gene complement(1756..3051)
/locus_tag="OIDGCHHC_00053"
CDS complement(1756..3051)
/locus_tag="OIDGCHHC_00053"
/inference="ab initio prediction:Prodigal:002006"
/inference="similar to AA sequence:RefSeq:CKG86288.1"
/codon_start=1
/transl_table=11
/product="thioredoxin reductase"
/protein_id="Prokka:OIDGCHHC_00053"
/translation="MSDNKDIYEIYTSNGLILEVDKNTNQIIFDKRKDGREVGKYTQE
YSKALFEADRILRTSPYINYQPRYLDPEFHTGQKSTLLEFKDWQSIYLDPIKGSIAP
WTKAEKAYNSLKTKKERYKYL VIRSGIRSVVIDIPYE AIGAVDEKGNVDPKYEELYR
TVDDNKHNLRSSLFHNEWGMAAGILGDYKYLANDMSQNGFNARFIQATILYIQLSGGS
SILDKPNLLGAIYGYADIAVGSGLVGVHKNPLREQQIKTLAKTLKPDEFGMLPFIDEI
MGVDWVIDYNEYQISEDEFDGIYKALRSDVVEGKIKDPRDIDSTYESRREFDYMDGY
SNGMINAYGYDIPNDWDAQLKIDSMILTAKLAALTPPQGYPNAPYYFTPEKLEWYYK
RHKLDKLLDPRIPAIYRYNFPRELRAKILKFGEEGIKE"
gene complement(3069..6566)
/locus_tag="OIDGCHHC_00054"
CDS complement(3069..6566)
/locus_tag="OIDGCHHC_00054"
/inference="ab initio prediction:Prodigal:002006"
/codon_start=1
/transl_table=11
/product="hypothetical protein"
/protein_id="Prokka:OIDGCHHC_00054"
/translation="MKIKNFTLITSNHNLEIELKNLTKNANKIIFICSDFDGYKEAEN
SLYKTLHTIEDNFKIDNTKTFKIIHLNQTNKDEITKEQKFSSDKNLSSIKKIIYNLKL
LLNDTINQENKTLNKIIDESNEKNIENFLKEIQKELNILLKNIKESNYFDQEIKPKI
QVTLDTLFTLLKNIAQSNDEYKQIIRAVAKFFINILDSITSLKKPISLIKKNPYVL
IVNTLFEAYNSYSEYQEYKEKKYYYDFAYPLLELITSKLYPIIALCNEEILSDVLIID
DKVLLDFSSYTNAPSISLYKNSFYKIIILDEEFQGVFDNFL ENLLKFENEKLDNTLLVN
SSLNNSDRTLKKAJNLNISKLNHFFYAEPDLNSSLMLVEMILDKKNADQINTTKMGKN
YLFITNPPQLNNAAGLCELDYQKLLGAIKRNPKALTKNEKLALKGDFPSKRDRYGSYFI
ERDVKKEDDFVLQCPFAKLDGQIYQKYKGYFNFYNTYSWMKLYLLEYINERFEYER
FKQDFAYIDNFFKLPKELEKISEKEKMEEYVELFNDYLDKINFRYDQIQFFLDSEP

```

LMFKTYENVDFKKYSPLTVLLTLTYVLQKDLAFTQEYSLGVKNIVIPNPDYGDKEI  
SLNYQRIKIPNYFNEYILFIPDDIYFYDNDKKIYIFLSKELNKNKKEDEVIYLDLAK  
AMFENNLKEDDQTYVKFLNTLNENFDDEIEFEENIQTNQTLPTKKDLKSIQEIMLDN  
ELAKLSLDITFFNIKQLFPFTEFFMSQPDFFKKMILFFINSSDKKYYGNKLFSSFK  
AHFFKELGIFYALNPKGRFIKIIPKNKPFNKLFYQIGTNYYYFSQSEYASELKSK  
SFSRLDKAKQIHLISKARKQLAIDFSIKVSKNLSVDVLKNLAGSFIDTLLPTNYERLK  
ILYEKLMYEKLTNYDFPLAVKKEEYITYPLLINSRFSFDLSEFIFGSLCTGGLNY  
YPSIACTTTSSEAREFALKRLLSYIILDEKRSFAMEDKINEGKYILNDKEFFEKNIE  
LRNCNIYKLEHFQRKEEYKTQNPMIKQHPILAYNDTIQILYEYINGIYNTIQDEKGNF  
IEDRQKARRLMENLEAIGQHNLEVMYKGINNKDVDNERNRRKDKESFNDIGKIQDYSN  
KFIGRLATTIIMEDGLYMG"

gene

complement(6563..7306)  
/locus\_tag="OIDGCHHC\_00055"

CDS

complement(6563..7306)  
/locus\_tag="OIDGCHHC\_00055"  
/inference="ab initio prediction:Prodigal:002006"  
/inference="similar to AA sequence:RefSeq:CKG86671.1"  
/codon\_start=1  
/transl\_table=11  
/product="methyltransferase small"  
/protein\_id="Prokka:OIDGCHHC\_00055"  
/translation="MDIKGSLSQKVNNEFVILQELISACTTDKGFALKVSFTPSKFK  
FDHSFDPKEGLGEQSKNQIELKEPIIRLHYKSDRFQKDNLPYINLLINNEKKEQDKAL  
NEFNIEQKDLKDIEDVNIQFNQFKQDFSEDYEFKELNLSFDTNLIKLYFIIPKNIQKVY  
KSAYKEFENKDLGAGYFTQLHEYDKIKNLSLEDKKEKELNEYHLTFLTPAKMQNLKQLQIA  
QGLDKILEDEDKQELYVCKFVVVNGVKI"

ORIGIN

1 ctttagtcca aggagctatg cttcctttga taggatcttt taaatatatg ctttgccaat  
61 ctttaaattc aagcaaagtg gattttttgcc ctgtgtgaaa ttcaggatct agatacctag  
121 gttgataatt aatataagga gaggttctta aaattctatc agcttcaaac aaagctttag  
181 aatattcttg ggtgtatttg cctgtagggt tttttgactt tgactctgaa aatagtattt  
241 ttccgctttg tttatctaca tttaatataa aaccttcggg tgtataaatt tcataagttt  
301 cactcatttt tatcctttct taatttatcc catatataaa ccatcttcca tgattatagt  
361 tgtagctaat ctgcctatgt aattacttta ttctttaatg ccattttctt cgccaaattt  
421 gagtatctta gctctaagtt cccttgggaa attatatcta taaatagcag ggattccttg  
481 atcaaggagt ttatcaagct tatgtctttt ataataccat tctaggtttt caggggtaaa  
541 ataataaggt gcattaggat agccttgttg aggagtgagg gctgtaggtt tggcatgaag  
601 tattaagta tcattaataa gttgtgccct ttcttcactc caatcattag gtgtatctgt  
661 tccatagcca tttaccatgc cattataata ccctccccta tggcgatcaa attcccttct  
721 gctttcataa gtagaatcta catcccttgg atcttttatc ttgccctcaa ctacatcact  
781 tcttaaggct ttatacatac ttccaaattc atcgcgagca attctatatt tattataatc  
841 aatcacccaa tctactccca taatctcatc tataaaagga agcataccaa attcatcagg  
901 ttttaaagtc ttagctaagg ttttaatttg ttgctctctt aaaggatttt tatgcactcc  
961 tactaaacca cttcctactg caatatctgc ataaccataa atagcaccca ataaattagg  
1021 tttatctagt atactacttc ctccgcttaa ttgtatataa agtatagttg cttggataaa  
1081 tcttgcatta aaaccatttt gagacatatc gttagctaga tttttataat caccagtat  
1141 tcctgctgcc ataccattt cattatgaaa taaacttgat cttagattat gtttattatc  
1201 atctactgtt ctatataatt cttcactactt aggatctaca tttccttttt catctacagc  
1261 tcctatagct tcataaggta tatctataac aacacttctt ataccacttc ttataactaa  
1321 atatttatat ctttcttttt tagtttttag tgagttataa taagcttttt ctgcttttagt  
1381 ccaaggagct atgcttcctt tgataggatc ttttaaatat atgctttgcc aatctttaaa  
1441 ttcaagcaaa gtggattttt gccctgtgtg aaattcagga tctagatacc taggttgata  
1501 gtctttgtag ggggagtttt gtttgatatt gtgtgcttca aaaagggtt tagaatattc  
1561 ttgggtgtat ttgcctacct tagctcccc atcacttaat aaaattttat tcgtttcttt

1621 ttctacatct aatataagtc cattaggtgt ataaatttca taagtttcac tcatctttta  
1681 tcctttctta atttatccca tatataaacc atcttccatg attatagttg tagctagtct  
1741 gcctatgtaa ttactttatt ctttaatacc attttcttcg ccaaatttta gtatcttagc  
1801 tctaagttcc cttgggaat tataatctata aatagcaggg attcttggat caaggagttt  
1861 atcaagctta tgtcttttat aataccattc tagtttttca ggggtaaaat aataaggtgc  
1921 attaggataa ccttgtggag gagtgagggc tgcgagtttg gcagttaata tcatagaatc  
1981 tatttttaat tgcgcatcat tccaatcatt tggaatatca taaccatagg cattaatcat  
2041 gccattagaa taaccatcca tataataatc aaactccctt ctactttcat aagtagaatc  
2101 tataatccctt ggatctttta tcttgccctc aactacatca cttcttaagg ctttatatat  
2161 atcccaaat tcatcttcag aaatttgata ttcgttataa tcaatcacc aatctactcc  
2221 cataatctca tctataaaag gaagcatacc aaattcatca ggttttaaag tcttagctaa  
2281 ggttttaatt tgttgctctc ttaaaggatt tttatgcact cctactaac cacttcctac  
2341 tgcaatatct gcataacatc aatagcacc caataaatta ggtttatcta gtatactact  
2401 tcctccgctt aattgtatat aaagtatagt tgcttggata aatcttgcac taaaaccatt  
2461 ttgagacata tcgttagcta gatatttata atcaccagc attcctgctg ccatacccca  
2521 ttcattatga aataaacttg atcttagatt atgtttatta tcatctactg ttctatataa  
2581 ttcttcatac ttaggatcta ctttctctt tcatctaca gctcctatag cttcataagg  
2641 tataatctata acaacacttc ttataccact tcttataact aaatatttat atctttcttt  
2701 tttagttttt agtgagttat aataagcttt ttctgcttta gtccaaggag ctatgcttcc  
2761 tttgatagga tcttttaaat atatgctttg ccaatcttta aattcaagca aagtggattt  
2821 ttgccctgtg tgaattcag gatctagata cctaggttga taattaatat aaggagaggt  
2881 tcttaaaatt ctatcagctt caaacaagc tttagaatat tcttgggtgt atttgcctac  
2941 ttcacgcca tctttcttt tatcaaatac aatttgattt gtatttttat caacttctaa  
3001 tataagtcca ttagaagtat agatctcgta aatatcttta ttatcactca tttttatcct  
3061 ttcttaattt atcccatata taaaccatct tccatgatta tagttgtagc tagtctgcct  
3121 ataaacttat tagaataatc ttgtatttta ccaatatcat taaaactttc tttatctttt  
3181 cttctgtttc tttcattatc aacatcttta ttgtttatcc cttatacat cacttctaaa  
3241 ttatggtgtc ctatggcttc taaattttcc atcaatcttc ttgccttttg cctatcttct  
3301 atgaaattac cttttcatc ctgtatagta ttgtaaattc catttatgta ttcatataaa  
3361 atttgtatag tatcattata agctaagata ggggtgtgtt ttatcatagg attttgtgtt  
3421 ttatactctt cttttctttg aaaatgttct agcttatata tattacaatt tctaagttct  
3481 atattgtttt tttcaaaaaa ttccttatca tttaaagatat atttgccctc attgatttta  
3541 tcttcataa aagcacttct tttctcatct aaaataatat aagataaaaag tctttttaag  
3601 gcaaattctc tagcttctc tgaagttgta gtgcaagcaa tactaggata gtaattaagc  
3661 ccacctgtgc acaataaaga accaaaaata aactcagata aatcaaaact cataaatcta  
3721 gaatttatca ataaaggata ggttatgtac tcttcttttt ttacagctaa aggaaaatca  
3781 taattgtaag tcaatttttc atacattagt ttttcatata aaatttttaa tctttcataa  
3841 tttgtaggca aaagtgtatc aataaaaagaa cctgctaaat ttttaatac atccacactt  
3901 aaatttttac ttactttaat agaaaaatca atagctaatt gttttcttgc ttttgatctc  
3961 aaatgaattt gcttagcttt atccaatctt gaaaaactct ttgacttttt taactcgctt  
4021 gcatattctg attgactaaa ataataataa tttgttccta tttgatataa aaaaagctta  
4081 ttgaatggct ttttattttt tgggatgatt tttataaaac gcccttttagg attaagtgca  
4141 taaaatatcc ctagttcttt aaaaaaatgt gctttaaaac tagaaaataa tttattgcca  
4201 taatactttt tatcagagct tgaatttata aaaaataaaa tcattttttt aaaaaaatca  
4261 ggctgactca taaaaaattc tgtaaaagga aaaagttgct taatgatatt aaaaaagtg  
4321 atatctaagg atagttttgc aagctcatta tcaagcataa tttcttgaat acttttatct  
4381 aaatcctttt ttgtaggaag tgtttgattt gtttgatat tttcttcaa ttcaatttca  
4441 tcatcaaagt tttcatttaa ggtgtttaaa aatttcacat aagtttgatc atcttcttta  
4501 agattatttt caacatagc ttttagctaat tcatctaaat agatgacttc atcttctttt  
4561 ttatttttat ttaactcttt ggataaaaag atgtaaattt ttttatcatt atcataaaaa  
4621 taaatatcat cggggataaa taagatatac tcattaaaat aatttggtat tttaatcctt  
4681 tggtaatata gtgaaatttc tttatcgcca taatctggat ttggaattac aatattttta  
4741 acaccaagag aatattcttg cgtaaaagct aagtcttttt gtaaaacata caaagttaaa  
4801 gtcaataaaa caaccgttaa aggtgagtat ttcttaaaat ctacattttc atatgttttg



```

4861 aacattaatg gttctgagtc aagaaagaat tgtatattgat catagcgaaa attgatctta
4921 tccaaataat cattaataag ttcgacatat tcttccatct tttctttttc tttttcgcta
4981 attttctcaa gctcttttagg taatttaaaa aagttatcaa tataagcaaa atcttgttta
5041 aatctttcat attcaaatcg ttcatttata tattctaata aataaagttt catccaagaa
5101 tatgtttgat tataaaaatt aaaatatccc ttatatTTTT gataaatctg tccatcaagt
5161 ttcgcaaaag gacaaagttg caagacaaaa tcatcttctt ttttaacatc tctttctata
5221 aaataagaac cataatctct tttgctagga aaatcgcctt ttaatgcaag tttttcattt
5281 tttgtaagag ctttggggcg attttttatt attgctccta attttttttg atacaaatct
5341 tcgcaaagcc ctgcattatt aagctgtggt ggattggtaa taaataaata atttttacc
5401 attttggttg tattgatttg atcagcattt tttttatcta gtatcatttc tactagcatg
5461 gaagaattta aatcagggta ttctgcataa aagaaatgat tgagtttggga gatatttaaa
5521 tttatcgcct tttttaatgt tgtgtcagaa ttatttaaac tagaattcac taaaagagtg
5581 ttgtctaatt tttcattttc aaattttaga ttatttttcta aaaaattatc aaaaacacct
5641 tgaaattctt catctaaaat aattttataa aaactatttt tataaagact gatagaaggt
5701 gcattagtat aagatgaaaa atctaataat actttatcat ctataattaa cacatcagat
5761 aaaatctctt cattgcataa agcaataata ggataaagtt tgctagtgat aagctctaaa
5821 agtggataag caaaatcata ataataatTTT ttttccttat actcttgata ttcagagtaa
5881 gaattataag cttcaataa tgtatttaca atcaaaacat aaggattttt ttttaattaa
5941 gaaatgggct ttttaaggct ggttatagaa tctaataat tgataaaaaa tttcgctaca
6001 gctctaataa tttgcttata ttcacatca ttagattggg caatattttt taaaagtgtg
6061 ttaaaaagcg tatctaaagt aacttgtatc tttggcttga tttcttgatc aaaataatta
6121 gattctttga ttttttttag taatatatTTT aattcttttt gaatttcttt taaaaaattt
6181 tcgatatttt tttcattgct ttcacataa attttattga gtgttttatt ttcattttga
6241 ttgattgtat catttaaaag ttttaaatTTT ttatagataa tttttttaat gctagataaa
6301 tttttatcag agctaaatTTT ttgttctttt gtgatttcgt ctttattggt ttgatttaaa
6361 tgtatgattt taaaagtttt tgtattgtca attttaaaat tatcttcaat agtatgtaat
6421 gttttataca gagaattctc agcttcttta tatccatcaa aatcactgca tataaaaata
6481 attttattag catttttggg aagatttttt aactcgattt ctaaattatg atttgatgta
6541 attaaagtaa aattttttat tttcatatTTT taaccctatt taccaccaca aatttacaaa
6601 cataaagctc ttgttttcta tcttcatctt ctaagatttt atctagtcct tgtgcgattt
6661 gaagttttta attttgcatt tttgcaggag ttaaaaaagt taaatgatat tcgtttaatt
6721 ctttcttatc ttctaaagaa tttttaatga ttttatcata ttcattgtagc tgtgtaaaat
6781 accctgctcc tagatctttg ttttcaaat ctttataagc acttttataa acttttagcaa
6841 tgtttttggg gataatgaaa taaagcttga ttaaattagt atcaaagcta agatttaatt
6901 ctttaaatc ataatcttca ctaaagctct gtttgaattg attaaagata tttacatcct
6961 ctatatcttt taaatctttt tgttctatat tgaattcatt taaagcctta tcttgttctt
7021 ttttttcatt attgattaaa agattataga taggcaaatt atctttttga aatctatcac
7081 ttttataatg aagtcttatt ataggctctt ttaactctat ttgattttta ctttgttctc
7141 ctaagccctc tttaggatca aagctgtgat caaatttaaa cttacttgga gtaaagctta
7201 cttttaaagc aaagccttta tctgtagtgc aagctgatat gagttcttgt aagattacaa
7261 attcattatt tactttcttt tgagataagg agcctttaat atccactacc ttagtacaag
7321 gataacttac atttgctatg gtattaggac aagctactat actag

```

//

```

LOCUS      OIDGCHHC_3                6566 bp    DNA        linear      12-APR-2021
DEFINITION Campylobacter species strain strain.
ACCESSION
VERSION
KEYWORDS   .
SOURCE     Campylobacter species
  ORGANISM Campylobacter species
            Unclassified.
COMMENT    Annotated using prokka 1.14.6 from
            https://github.com/tseemann/prokka.
FEATURES   Location/Qualifiers

```

```

source      1..6566
            /organism="Campylobacter species"
            /mol_type="genomic DNA"
            /strain="strain"
gene       complement(303..1304)
            /locus_tag="OIDGCHHC_00056"
CDS       complement(303..1304)
            /locus_tag="OIDGCHHC_00056"
            /inference="ab initio prediction:Prodigal:002006"
            /inference="similar to AA sequence:RefSeq:AAW35443.1"
            /note="conserved domain protein"
            /codon_start=1
            /transl_table=11
            /product="hypothetical protein"
            /protein_id="Prokka:OIDGCHHC_00056"
            /translation="MGGYLAQMALIYCDIKYKDKLSFSPNEVYTFNAPSVYGWNFPNI
AINPNTIKIMQDLLGKYTIDVSEKITHIYDNGGVEIIASAQYGASNALDIYTGKNDHS
IKPLVNTLYFYSYLLELDANYNKVKDKSLSECIEYLNHFMKNIQIYTETFVLKNNATN
NKNFARKNGPLGFFRSSPEKINHFYFLSLIATIMQETNDILEELGDSYYSYKTPII
SQTEIIDFILKAQEKEYILILDKNDFNKYRKDCSFINNQENLAHKIAIGEFRIFIAV
YKDMKCLININITKIYGYNSKSYKIKDQIWDERYLGGVCKISQALYFSGKAKIGII"
gene       complement(1313..1501)
            /locus_tag="OIDGCHHC_00057"
CDS       complement(1313..1501)
            /locus_tag="OIDGCHHC_00057"
            /inference="ab initio prediction:Prodigal:002006"
            /inference="similar to AA sequence:RefSeq:AAW35443.1"
            /note="conserved domain protein"
            /codon_start=1
            /transl_table=11
            /product="hypothetical protein"
            /protein_id="Prokka:OIDGCHHC_00057"
            /translation="MFYDKEKDKFVVGFRGTEGFWNMDTMQDITLSLNGNLQSSPLLE
FLEQVDKIIKNENKISYL"
gene       complement(1597..1803)
            /locus_tag="OIDGCHHC_00058"
CDS       complement(1597..1803)
            /locus_tag="OIDGCHHC_00058"
            /inference="ab initio prediction:Prodigal:002006"
            /inference="similar to AA sequence:RefSeq:AAW35443.1"
            /note="conserved domain protein"
            /codon_start=1
            /transl_table=11
            /product="hypothetical protein"
            /protein_id="Prokka:OIDGCHHC_00058"
            /translation="MKEKINKLRDYAELAQASYFYFDLKGYILQENETIVILNELVSL
SYNGKIAGKKKRSKNIIVLLAKVN"
gene       complement(1813..2118)
            /locus_tag="OIDGCHHC_00059"
CDS       complement(1813..2118)
            /locus_tag="OIDGCHHC_00059"
            /inference="ab initio prediction:Prodigal:002006"
            /codon_start=1
            /transl_table=11

```

```

        /product="hypothetical protein"
        /protein_id="Prokka:OIDGCHHC_00059"
        /translation="MGVFRKFYIVWVFCISGFAISPAVGHNPNRVYEFFVMLGWIIIF
gene      PLILLMLYRFFSLCEIKFLYIALLLLLLYPIALILYMFYHNSFYVTLYIFLSLFK"
        complement(2246..2572)
        /locus_tag="OIDGCHHC_00060"
CDS      complement(2246..2572)
        /locus_tag="OIDGCHHC_00060"
        /inference="ab initio prediction:Prodigal:002006"
        /codon_start=1
        /transl_table=11
        /product="hypothetical protein"
        /protein_id="Prokka:OIDGCHHC_00060"
        /translation="MNTLKKIYIIWGMFWTIGLGIFVPTAHGFDSMDFVDFFILALQF
gene      IAIIWLPPLLIFNIVYFAIKKERKYIINTLWILLYPIALILYMFYHNSFYVTLYI
        FLSLFK"
        complement(2693..3220)
        /locus_tag="OIDGCHHC_00061"
CDS      complement(2693..3220)
        /locus_tag="OIDGCHHC_00061"
        /inference="ab initio prediction:Prodigal:002006"
        /codon_start=1
        /transl_table=11
        /product="hypothetical protein"
        /protein_id="Prokka:OIDGCHHC_00061"
        /translation="MIRLKKILKISSFILLPLIIIIWSMTFGWGFVPYSLQPSYHEFK
gene      EMCKLDPEIQANGGKIDKEYNKL LAYFNTNFEEVLQGNKGLSREGNSFNEKINIYR
        FRGEIKNNRQEIMLSLNIEKNKTTNEILPLKKVFFYVEWHNRRKYLTIKSVASYEFEW
        RENYENCAYFKKEIK"
        complement(3221..3796)
        /locus_tag="OIDGCHHC_00062"
CDS      complement(3221..3796)
        /locus_tag="OIDGCHHC_00062"
        /inference="ab initio prediction:Prodigal:002006"
        /inference="similar to AA sequence:RefSeq:AVS37480.1"
        /note="DUF2974 domain-containing protein"
        /codon_start=1
        /transl_table=11
        /product="hypothetical protein"
        /protein_id="Prokka:OIDGCHHC_00062"
        /translation="MFVADASLAIGSIPKAQYDDMINFYETCIKDYPQIKEKDSLAI
gene      TLDINAIPILADIAPYRQLAYNNIESKESA"
        complement(3800..4312)
        /locus_tag="OIDGCHHC_00063"
CDS      complement(3800..4312)
        /locus_tag="OIDGCHHC_00063"
        /inference="ab initio prediction:Prodigal:002006"
        /inference="similar to AA sequence:RefSeq:AVS37480.1"
        /note="DUF2974 domain-containing protein"
        /codon_start=1
        /transl_table=11
        /product="hypothetical protein"

```

```

/protein_id="Prokka:OIDGCHHC_00063"
/translation="MKNKAVINKLKDENSELAWASYGYFHLANPRYDFNKDNIDKERLE
YFRKLYKNNKLESSKTDEQLQSIYPTPADILNIECKYFKDNNGKPKQDSWYHKHFLGGD
FSPLQAKQFFSRYDLLKHCPNTNSGFSATLFG EK RKQIDSKTKEESY TSEYGYINYIL
AIRGTEMSSF"
gene      complement(4316..4888)
          /locus_tag="OIDGCHHC_00064"
CDS       complement(4316..4888)
          /locus_tag="OIDGCHHC_00064"
          /inference="ab initio prediction:Prodigal:002006"
          /codon_start=1
          /transl_table=11
          /product="hypothetical protein"
          /protein_id="Prokka:OIDGCHHC_00064"
          /translation="MTYILLIIISTILSYLILKFIYKIIIFKSKSVSKFLVFLGSIG
LIIFYYPYSYYLEPSFYKFEICKLDPEIYQANGGKLDEEYYNKVLRYFDTDLDNMS
KSYKKELGVTNDKKYSRYWFETWIDGRTEISFEIWFKSNI AIKDNIDFSIKPFFYANW
DKMRPLPAGNEG TGFFLGSVPISCIYFKKD"
gene      complement(5073..5576)
          /locus_tag="OIDGCHHC_00065"
CDS       complement(5073..5576)
          /locus_tag="OIDGCHHC_00065"
          /inference="ab initio prediction:Prodigal:002006"
          /codon_start=1
          /transl_table=11
          /product="hypothetical protein"
          /protein_id="Prokka:OIDGCHHC_00065"
          /translation="MELEKKREEFRSKYL GSEIKVGNETHFVNFSYLKKKFPQVLSNG
CKYYRNDYNYDVKDPDYDFNFDDKPEFAYYEDQFKAYMGEENYKCLR PYLGMTTYVVC
EGRKYPVVFATMIDYKVKNYGLFGDEGRGFSFSSISRKSAGGGSFH YFTNGKFIKSDE
KYTGQSY"
gene      complement(5938..6423)
          /locus_tag="OIDGCHHC_00066"
CDS       complement(5938..6423)
          /locus_tag="OIDGCHHC_00066"
          /inference="ab initio prediction:Prodigal:002006"
          /codon_start=1
          /transl_table=11
          /product="hypothetical protein"
          /protein_id="Prokka:OIDGCHHC_00066"
          /translation="MFLLPVYLLLFLVGGCSYKYM DPQYYEFRSLCKDIDNKV IYNK
AYWEIFSNREKNTMHDEKGEFFFNQKINKKIYFD FKSESINVLQKNKFTL TEVTFE
DYYDGIHYSTHLSYIYDNYGMFLKGDEGAGLYFRYMEVLSCKNIDKKFKKDDWQVETL
E"

```

ORIGIN

```

1  ctttaggaga aaaataataa ctgggtatat cttgttttat agtattatct tgatctaatt
61  ctccaaaata aaaaggatta ttagaaagtt catttgagcc tgtaaggagg gtggagttta
121 ggaagatata agcttgatag ctttgcaact cttcaaaagt aaaatctgtc gttgcttcta
181 atttataaag ttcttcataa atgctttggc aatcaatgat gcttttattt tcgcaaaata
241 aataaatact ttttttatct ttatgaatag aatataaaaa gtctctacct atcataattt
301 tcctaaataa tacctattht ggctttttcca ctaaaatata aagcttgcg a tattttacaa
361 actccaccta aataccgctc atcccaaatt tgatctttta ttttatagct ttttgaatta
421 tatccatata tttttgttat attattaata ttttcaagac atttcatatc tttataaact
481 gcaatgaaaa ttctaaattc cccaatggca attttatggg ctaaattttc ttgattatta

```

541 ataaaggaac aatcttttct gtatttatta aaatcatttt tatcaagaat taaaatatat  
601 ttttcttttt cttgvcctt taaaataaaa tctataatth ctgtttgact aataatagga  
661 gttttataac ttgtataata actatctcca agctcttcta aaatatcatt ggtttcttgc  
721 attatagtgg ctattaatga aagaaagtat tcaaaatgat tgattttttc tggggagctt  
781 ctaaaaaacc caagaggtcc atttttacga gcaaaattht tattattagt agcattatth  
841 tttaacacaa aagtttctgt ataaatttga atatttttca tgaaatgatt aagatactct  
901 atacactcac taaggcttht atctttgact ttgttatagt tagcatctaa ttctaaaaga  
961 taagaataaa aatagagagt attaacaaga ggttttatag agtgcattc tttccctgta  
1021 tatatatcta aggcattgct tgcaccatat tgagctgaag caatgatttc aactccacca  
1081 ttatcataaa tatgagtgat tttttctgaa acatctatag tatattttcc taaaagatct  
1141 tgcataatth ttatagtatt agggttgata gctatattag gaaaattcca accataaaca  
1201 ctaggggcat taaaagtata aacttcatta gggctaaaag atagtttatc tttatattta  
1261 atatcgcaat atatcaaagc ctttgagct aaataccac ccaatgaatg tcctacaaat  
1321 atgatattth attttctatt ttgatgattt tatctacttg ttctaaaaat tctaaaagag  
1381 gagaagattg gagattgcca ttaagagata gagttatgtc ttgcatcgta tccatattcc  
1441 aaaaaccctc agtccctcta aatcctacaa caaatttatc tttttcttta tcaataaaca  
1501 aagtagcact aaaaccactt aaagtgttgg cttgatggaa tttaatctca tatctttgag  
1561 agaaatttct agcttghtat tctccaaatt ctccatttaa tttaccttg ccaataaaac  
1621 tatattcttg tccgacctt tcttttttcc agctattttt cgttataac ttaaacttac  
1681 aagctcattt aaaataacga tagtttctatt ttcttghtat atataacctt ttaaatcaaa  
1741 ataaaaataa ctagcttgtg caagctcggc ataatctctt agcttattga tttttcttt  
1801 caaaattatc ctttatttaa ataatgataa aaaaatatat aatgtaacat aaaaactatt  
1861 atgataataa aacatghtat acaatatcaa agctatagga taataaagta acaatagcaa  
1921 tgctatatac aaaaacttta tttcacaaag agaaaaaag cgataaagca ttaatagaat  
1981 taaagggaaa ataatccaac cttagcattac aaaaaattca tacactctat ttggattag  
2041 ccctacagca ggagaaatag caaatccact tatacaaaat actaccaaa caatataaaa  
2101 cttacgaaat acacccttt attttcttt ttaatatttt tagtaaaatt cttctacttt  
2161 tttaaaaatt aaaataaaaa taactagctt gtgcaagctc ggcataatct cttagcttat  
2221 cgattctttc tttcaaaatt atcctttatt taaataatga taaaaaata tataatghta  
2281 cataaaaact attatgataa taaaacatgt aatacaatat caaagctata ggataatata  
2341 ataatatcca taatghtatt ataatatatt ttctttcttt ttttatcgca aaatatacaa  
2401 tattaaaaat gghtaatgga ggcaaccaa ttatagctat aaattghtaa gcaaghtata  
2461 aaaaatccac aaaatccata ctatcaaatc catghtgctgt aggcacaaaa attccaaghtc  
2521 caataghtcca aaacatcccc caaatghat aaattttctt taatghtattc atttattttc  
2581 ctttttaata tttttaghtaa aattcttcta cttttttaa aattaaaata aaaataacta  
2641 gcccaaghta gttctghatt gtctctaagc tttttaatct gttctttatt gttcatttta  
2701 tttctttttt aaaataagca caattttcat aattttcacg ccattcaaat tcaataagag  
2761 caacactctt tattghtaaga tacttctttc tattatghtca ttctacatag aaaaaactt  
2821 tttttaatgg taaaatttca ttaghtaghtt tatttttttc tatghttaght gataacatta  
2881 tttctghtct attatttttt atctcacctc taaaacghata ghattghtatt ttttcattha  
2941 aactatttcc ttctcghat aaacctttat ttccctghtaa aacttcttca aaatttghtg  
3001 taaaataagc taataattta ttataghtatt cttghtctat cttaccacca ttagctghtat  
3061 aaatctctgg htctaghtta cacatctctt taaattcght ataactcght tghtaghtat  
3121 aaggcacaaa ccaccccaa ccaaatghtca tactccatat aattatcaaa ggaaghtaga  
3181 taaaacttga tatttttaga atctttttaa gccttatcat ttatghactc tctttagatt  
3241 ctatattatt ataagcaaght tghtctataat atggghtcaat atctghtaag ataggaatgg  
3301 cattaatatc aaghtghatc attghtghtat ghaghtaaat actcattatt atccataat  
3361 atghtatttgg ttttcttgg attatctght ghaatatctc tghtatctta ctttctaaga  
3421 aatattatc tttgcctaaa tctctghtc tatttghtat attttctatt tcttctttta  
3481 taaatctttc ttghttghtt ttactghtaa atataaagag tttghactata taatcataag  
3541 ghaghtattat ctttctaght ccagghtghat tataaghtata taaagcttth atattghttc  
3601 tattcttatc atcacagata cttaaagcaa agaghtghtc tagacagctt ccaatghat  
3661 ghtcghtaat ghcaagagaa tctttttctt tghattghtggh ataactttha atacaaghtt  
3721 cataaaaghtt tatcatatca tcatattggh ctttggghat agagcctatg gctaaagag

3781 catcagctac aaacaaatct taaaaagaac tcatttctgt tcctctaata gctaaaatat  
3841 aattgatata gccatattca ctggtatagc tttcttcttt agttttacta tcaatttggt  
3901 ttcttttttc tccaaataaa gtagcagaaa aacctgaatt tgtattagga caatgtttta  
3961 ataaatcata gcgagaaaag aattgttttag cttggagtgg ggagaagtgc ccacctaaga  
4021 aatgtttatg ataccaagaa tcttgaggct taccattatt gtctttaaaa tatttgcatt  
4081 ctatattaag aatgtctgca ggggtagggt aaatggattg taattgttca tctggttttac  
4141 tagattctaa tttattgttt ttatataatt ttctaaaata ctctaactct tctttgtcta  
4201 tgttatcttt attgaaatca taccttggat tagccagatg aaaatatcca taactagccc  
4261 aagctagtgc tgaattatct tttagcttat taatcactgc tttatttttc attgttttagt  
4321 cttttttgaa atatatgcaa cttattggga cacttcctaa aaaaaatcct gtcccctcat  
4381 tacctgctgg gaggggtctc attttatccc aattagcata aaaaaaagggt tttatactaa  
4441 agtcaatatt gtctttttatt gcaatattac ttttaaacca tttttcaaag cttatttcgg  
4501 ttcttccatc tatccatggt tcaaaccagt atctactata ttttttatca ttagttacc  
4561 cttagctcttt tttatatgac tttgacatat tatccaaatc cgtatcaaaa taccttagca  
4621 ctttattata atattcctca tctaatttac caccattggc ttggtaaadc tctgggtcta  
4681 gcttgcataat ttcttttaac ttataaaagc ttggctctaa ataataagaa taaggagtat  
4741 aataaaaagat aattaagcct atacttccaa gaaagactaa aaactttgaa acactttttt  
4801 tagattttaa gatgatttta taaataaatt ttaatataag ataagaaaga atagtagaaa  
4861 ttataataag aagtaatatg tatgtcatta taagtatttt cttttagatt atctatttta  
4921 ttaaaattaa gatgtaattt tgtggtttag tgttagcagt ataacttttt ctttatcatt  
4981 aaaataatag agcttgtttt ttcatatatt tttatccttt atagtttata tcttctagtc  
5041 tttgatttga gagataagtt ctttaggggt catcagtaac tttgtcctgt atatttttca  
5101 tcacttttta taaatttacc attggtaaaa taatgaaaag atcctccgcc tgcactttta  
5161 cgacttatgc tagaaaagct aaatcctctt cttcatctc caaataatcc ataatttttt  
5221 actttataat ctatcatggt agcaaaaaca acaggatatt ttctaccctc acacacataa  
5281 taagttgtca tacctaataa aggtcttaat tttttatagt tttcttcacc catatatgct  
5341 ttaaattgat cttcatagta tgcaaatcgc ggtttatcgt cgaaattaaa atcataatct  
5401 gggctctttta catcataatt ataataatta cgataatatt tacaaccatt agaaaggact  
5461 tgggggaatt ttttcttcaa ataagaaaaa ttcacaaaat gagtttcatt tctacttta  
5521 atttcactac ccaataactt actacgaaat tcttctcttt ttttctctaa ttccaatctc  
5581 tcttctctta tttttttatc aaagatataa attccaccat aattacttgc aagagtttct  
5641 atttcacttg ctttttttct ttaaaagcac atgcacttaa aaatactaaa gaaaataagc  
5701 ttagaattat cattgtgatt ttcatttaat actccttttt aaattgtatt atttcaaata  
5761 cttatataa ataaaattta gtttttatat ttaatatac gcaaaaaacc tttttcatca  
5821 ttctcatcga ttaaatcaag cattgcataa ctagcatctg ctatattagc atagtcaaaa  
5881 aaatttagtg attaagtcta atttagcttc ttgtgtttta atgtttttac tcaattgtta  
5941 ttccaaagtt tcaacttgc aatcatcttt cttaaatttt ttatcaatat tcttacaact  
6001 taatacttcc atatatctaa aatataatcc agcaccctca tcacttttta agaacatacc  
6061 ataattatca taaatatagg ataaatgctg tgaataatga ataccatcat aataatcttc  
6121 aatgtaact tctgttaaag taaattttatt tttttgcaac acattaatgc tttctgattt  
6181 tttaaaatca aatatatatt ttttatttat tttttgatta aaaaagaatt ctcctttttc  
6241 atcatgcatt gtatttcctt tttctctatt gctgaatatt tcccaataag ctttattgta  
6301 aattattact ttattatcta tatctttaca caagctccta aactcataat attgctggatc  
6361 catatattta taagaacatc ctctactaa gaataataaa agatatacag gtaaaagaaa  
6421 caaagtaaatt tttttaaata ttgttttaaa atttatagtt tttgttttat tttttatttt  
6481 aaaaaagact ttaaagataa aatataaaat aatagaaaat ataaaaacaa aaaagaaaaa  
6541 tataagaata aatattaaaa gattaa

//

LOCUS O1DGCHHC\_4 5820 bp DNA linear 12-APR-2021  
DEFINITION Campylobacter species strain strain.  
ACCESSION  
VERSION  
KEYWORDS .  
SOURCE Campylobacter species

ORGANISM Campylobacter species  
Unclassified.

COMMENT Annotated using prokka 1.14.6 from  
<https://github.com/tseemann/prokka>.

FEATURES Location/Qualifiers

source 1..5820  
/organism="Campylobacter species"  
/mol\_type="genomic DNA"  
/strain="strain"

gene 22..600  
/locus\_tag="OIDGCHHC\_00067"

CDS 22..600  
/locus\_tag="OIDGCHHC\_00067"  
/inference="ab initio prediction:Prodigal:002006"  
/inference="similar to AA sequence:RefSeq:APA51619.1"  
/codon\_start=1  
/transl\_table=11  
/product="lysozyme"  
/protein\_id="Prokka:OIDGCHHC\_00067"  
/translation="MQNLKLQIAQGLDKILEDEDRKQELYVCKFVVVNGASENKIKAK  
NKDVNIDNDTKNINTTKSNNISSENNAQEIIPDNVIRIQTQDGSGEFIEIVFDELKE  
WEKSSSGAIKPLFTPLEGIVEDISNSLENVSIIGDTLAMLGAVKNPKNAKNIKKKSL  
TKDEVLQIVDKLPKNVRDKCRRIVENKEELDK"

gene 686..817  
/locus\_tag="OIDGCHHC\_00068"

CDS 686..817  
/locus\_tag="OIDGCHHC\_00068"  
/inference="ab initio prediction:Prodigal:002006"  
/inference="similar to AA sequence:RefSeq:CKG86671.1"  
/codon\_start=1  
/transl\_table=11  
/product="methyltransferase small"  
/protein\_id="Prokka:OIDGCHHC\_00068"  
/translation="MIKLLYNIKLLKVGGETIEINSNKPRENLRRAIHIENGVKNEV"

gene 807..1544  
/locus\_tag="OIDGCHHC\_00069"

CDS 807..1544  
/locus\_tag="OIDGCHHC\_00069"  
/inference="ab initio prediction:Prodigal:002006"  
/inference="similar to AA sequence:RefSeq:CKG86653.1"  
/codon\_start=1  
/transl\_table=11  
/product="hypothetical protein"  
/protein\_id="Prokka:OIDGCHHC\_00069"  
/translation="MKYKYIKWNKEEKCAIFFPDIDYSLWKKTQLKENVYNNPSLIIS  
SCLITKMDILELFEYYILFIGKSMGTSRWEENLILLDTYNIDNLSNPFSLNTPKPT  
YTSEYINILGQLFLAGYIDFGSYCDEEDRNKIDYPSNLSYYKEDKYQAWIYFRDNFFY  
QDKFIRDLDDEPETLDEDEGYSLILGDVSWDTPQYWSQYNIWVATTPKGTKYFNEILAPK  
FYNKYKDLEVEIDDKSNVLRWIGEINR"

gene 1554..2324  
/locus\_tag="OIDGCHHC\_00070"

CDS 1554..2324  
/locus\_tag="OIDGCHHC\_00070"  
/inference="ab initio prediction:Prodigal:002006"

```

/codon_start=1
/transl_table=11
/product="hypothetical protein"
/protein_id="Prokka:OIDGCHHC_00070"
/translation="MAIGKVIHKYGSFFPDFDEIFYNLGYDGCIFDEKSDIKLFLQIP
NLKKTIDILEYFEDHFLGSIFEDACEFNDLDCPLFYTEDENLKNSEIKPNYNSEYVNIIG
QLFLAGYIDFGITPRSEDKYTRTDYPTNLSYYKEDKYQAWIYFRDNFFYTNAFLKGY
DDILIIYKGKEYTANTLPKLLKGETIHSTMHSAASWDMPRYWSGYNIWVTRTQKGTKYL
REILEPRVYNKYKDLVEIDDKGNVLRWIGEINRDKKY"

```

ORIGIN

```

1  acttttttaa ctcctgcaaa aatgcaaaat ttaaaacttc aaatcgcaca aggactagat
61  aaaatcttag aagatgaaga tagaaaacaa gagctttatg tttgtaaatt tgtgggtgga
121 aatggggccta gcgaaaacaa aataaaagca aaaaataaag atgtaaatat agataatgac
181 acaaagaata taaacactac aaaaagcaat aatataagtt ctagtgaaaa caatgctcaa
241 gaaatcatcc ctgataatgt tataagaata caaacacaag atggtagtgg agagtttatt
301 gagatagtat ttgatgaact taaagaatgg gaaaaatcat caagcggagc cataaagcct
361 ttatttacc cattagaagg tatagtggaa gatatttcaa attcacttga aaatgtcagc
421 attatcggtg ataccttagc aatgcttggt gcagtgaaaa atcctaaaaa tgcaaaaaat
481 attattaaga aaaaatcatt gacaaaggat gaagtgttgc agatagtgga taaactgcca
541 aaaaatgtcc gagataaatg cagaagaata gttgaaaaca aagaagaatt ggacaaatga
601 tggaaaaagt taactaaaaa ttctaagag ttagaaaata aagtagataa aaaatacgga
661 caatcaactt acatgagaaa attagatgat caaactatta tacaatataa aaaagcttct
721 aaaagttgga ggcgagacca tagagataaa ttctaacaaa ccaagagaaa atcttagagc
781 aatacatata gaaaatgggg tgaaaaatga agtataaata tatcaaatgg aataaagaag
841 aaaaatgtgc tatatttttt cctgatatag attatagctt atggaagaaa acacaattaa
901 aagaaaatgt ctacaataat ccctctttaa ttatatcttc ttgcctgata acaaaaatgg
961 atatttttaga gttatttgag tattatattt tatttatttg cggaaaaagc atgggcatat
1021 caagatggga gtgtaataat ttaattttat tggatactta taacattgac aatcttagca
1081 accctttctc tttaaataca cccaagccta cctatacaag tgaatatata aacatcttag
1141 gacaactatt ctagcagga tatatagact ttggttctta ttgcgatgaa gaagatagaa
1201 ataaaataga ctatccctca aacttatctt attataaaga agataaatac caagcttgga
1261 tatatttttag agataatttc ttttatcaag acaaatttat tagagatttg gacgatcctg
1321 aacattgga cgaggatgga tatagtctta ttttaggtga tgtttcttgg gatacgccac
1381 aatattggtc acaatacaat atctgggtag caacaaccc caaaggcaca aaatatttta
1441 atgaaatctt agctcctaaa ttttataata aatacaaaga tttagaagta gagattgatg
1501 ataagagtaa tgtgcttagg tggattggag agattaatag atgaaagata aaaatggcga
1561 ttggtaaagt aattcataaa tacggttcgt tctttcctga ttttgatgag atattttaca
1621 atttaggtta tgatggtatt tgttttgatg aaaaatcaga tataaagctt tttctacaaa
1681 ttccaaacct taagaaaaca gatatttttag aatattttga agatcatttt ttaggatcaa
1741 tttttgagga tgcatgcgaa tttaatgact tggattgtcc tttgttttac acagaagatg
1801 aaaacttaaa aaattccata aaaccaaatt acaatagtga atatgtaaatt attataggac
1861 aactattttt agcaggttat atagactttg ggattactcc aagatcggaa gataaatata
1921 caagaacaga ctatcctact aatttatctt attataaaga agataaatat caagcttgga
1981 tatatttttag agataatttc ttttatacta atgcattttt aaaaggatat tatgacgata
2041 ttttaactca taaaggcaaa gaatatacag caaatactct acccaaactt aaaaaaggag
2101 aaacgatcca tagtacaatg catagtgtctg cttcttggga tatgccaaaga tattggagtg
2161 ggtataatat atgggtaaca agaactcaaa aaggcacaaa atatctcctg gagatttttag
2221 aacctagagt ttataacaaa tacaagatt tagaagtaga gattgatgat aagggtaatg
2281 tgcttagatg gataggagag attaatagag acaaaaaata ttagcaataa aaaaatgata
2341 taataatgct ttatataagg aatcttttat gtttataagt tctaaaacag agttaattca
2401 aactattaaa aatttaacaa tcaacaataa agaagttaaa cagattgatt ttatttatcc
2461 taatttttct attttacacg ctatattaga aaatattgat tttcatcaaa gaaaaatcct
2521 atttaaaaat caaatattgg ctatggaaat attagaaatt ttaaaacaaa ctctgtataa
2581 tcacaataat atagaagtaa atatccatac cttaatgag cttgatgctg gacaaaatgt

```



2641 aaatttaaaa gatttatcaa gcagtgaat ttgcactaaa gtttatttag aagacttaga  
2701 agaagaaatt caagataaga aacaaggtaa agattttaat cttttttatc atacagataa  
2761 aaataatctt tgtatcgaat ttattaatac tttaaaagaa ttagccaaag attctgaaga  
2821 tataacaacc ttggacgagt taatccacaa cattaatcct gatgatataa gcagtgagaa  
2881 atttgatgat ttttaagaaaa aagttttaga aaagattgta aatgtcatag aatcggattt  
2941 tttcaaaaat agcataagtc ccactttaaa aaatacttat gaaaaattta tcgatgagtt  
3001 gttagaacac attaaaaaac ttgccgaaga aaaagaatat gaaaaatta aaatcatact  
3061 aagtgcata gcgggtgtta caatagccac agtggttagct gttcttacag gtggggcagg  
3121 actagctatt ttggctgctg gtttattttc tttaatgggt tctgcaagcg agtattatga  
3181 atttgctcaa agagattatg gcacactttt aacgccttta gccgcatttt tagccactag  
3241 atgtgctatg tttattcatt atattaattc tcgcttgta tcttgtgttt taattattga  
3301 taaaaaagaa attattgatt taagtggttt tggattatat cttggaagtg atgaaagcaa  
3361 tatcgcttca aatttagcct ataaaaaac cttaagcgaa gaaataaaaa gcatcgaaaa  
3421 ttttttagt gaaatctttt taaaccaga acaaaaagac aatgagagta aaaatacagc  
3481 taatgattca aaatcgagca atttaccgc tttcatttca acgcaaaaat tatctaattt  
3541 gtatttaaaa aacaatgcta ttttaaagaa tttacaagaa gatattaaac aatttattta  
3601 tttttcttat atagaaagtc caaattttta ctcaagtaaa cttagctgaat ttttcgcaca  
3661 aaaaaatcaa aacacacaaa tagattttaa tacaactaaa atgagtaaaa attatttgat  
3721 ttttcaaat atccccaata aatacaatgc aggacttagt gaaagtttaa ttcaagaat  
3781 cgccaactat aatatacaag ataaatacag aacaattaaa aaaaatattg atacttcaaa  
3841 aaaaacttat gacagcacia gagattatag cgaatatagc atagaaatgc cacaagatga  
3901 aatgaacct tatattttac aattaagccc ttttgtgaaa atatccaaag aagcttatga  
3961 gaatagtaaa aaagcttatg aagatatgca agagatttat aaatatttaa caaattttgt  
4021 tgctacaccg cagaagctac cagaattcgc aaaaacagct aaagaaaaat tagcaatc  
4081 agaaaatgag tcagtaaaaa agacggaaaa tttacgacat tgcgaacgaa taacatttt  
4141 agcttatatt gactacaata aaaaaataaa tgataaaaaa tggcttcctt atttttatat  
4201 caaaaaattc tttaaacaaa acgaagacaa agaatccatc atagaaaaag aaaaaaaat  
4261 agctcatcaa tatttaactt ttttgaaaaa agagcttttt gaaaaatcgg ataaatcttc  
4321 atttggaac tattctttat cggataaatc ttcatttgga aactattctt taatggaatg  
4381 tttatttatt tcatttgtct tgtatcaagc taagcttatt tttccaaata tcaatttgga  
4441 tttgaaaaaa tatggaggca gtaattttgt atatataaaa tacttagagg aaacttatgt  
4501 tttatggaca gatgaatc caatataatg aaataatgag ccaacaaata ttacagcata  
4561 tgaagttgta tcgcaattat taaaaatact tgacaaaaaa gattattctt ttgtgaaaaa  
4621 tgatagtctg atcactatag atgatttttt taatgaatta tcaaaagatt tagatgcaac  
4681 aaatacatta gataaaaaaa taatcaaatg gaagcaaatg tatcatttag atgaacaaaa  
4741 atgcattaaa gaatttatga attttagacga agaagcgcaa caagcttttt ttgtatggat  
4801 ggatatagag aaacaaatat cagatttatc aaagcttttg gaacagatgt atggaaaaga  
4861 atatttaaat aaggcaaaag aacaaaaaac aagtgaataa tttacttatg caatgttaaa  
4921 aattttatta agtgctagtc cttttatcag ctttacagct caaatgttgt gggattttaa  
4981 ttttttaaaa acaatagaat atgttattca agcttgtatt aaaataaaca aagaaggatt  
5041 taaagaattt tttaaagaac agcttggtat ttttacacct ctaaaatc atatacacat  
5101 aaaatctaat ttaataataa aagcgcgctt gcaacaaata gaaaaagaat taactcatac  
5161 taaaatcaa atgatttttag cacaagagat aaaatccaat ttaataatac aaaaaatac  
5221 atccagttta aatctattta tcacaaagat aaaagaatac tttaatgaaa aacaaattaa  
5281 gatttattgg agtgataaat atatgaaaca attatttata tactccaatc aagaaagcaa  
5341 tatactaaa attgctctta tgcatacat agatatacaa actcaaaaat atactattta  
5401 tacttatgct aagctaaata aacttgacct tgcttctatt gtggctggag aatttgtggg  
5461 tttttttta aattatctct ttccaacaaa ttttaaagcc ttacaagaac aatatgaaag  
5521 cattgtttat cagctttaca cttttaaaga tgattctcct ttggcggtta taagagatca  
5581 ttttataact tatccttttg caatcaattc aaaattcatt agctttgatt taaagaaaat  
5641 tttttatggc atagatcttt gcacaggagt ttttgacact catttttctt tcattatga  
5701 aatagatcaa aagcttgaag aaaataaaga atttctttta aaaagacttt tgtcttattt  
5761 gattattgat gaaaaagaa gtgcaactgc ttttagaggat ataaaagaac aaaaatatat

LOCUS           OIDGCHHC\_5                   4447 bp     DNA           linear           12-APR-2021  
 DEFINITION     Campylobacter species strain strain.  
 ACCESSION  
 VERSION  
 KEYWORDS       .  
 SOURCE         Campylobacter species  
   ORGANISM     Campylobacter species  
               Unclassified.  
 COMMENT       Annotated using prokka 1.14.6 from  
               <https://github.com/tseemann/prokka>.  
 FEATURES  
   source        Location/Qualifiers  
                   1..4447  
                   /organism="Campylobacter species"  
                   /mol\_type="genomic DNA"  
                   /strain="strain"  
   gene          32..754  
                   /locus\_tag="OIDGCHHC\_00071"  
   CDS           32..754  
                   /locus\_tag="OIDGCHHC\_00071"  
                   /inference="ab initio prediction:Prodigal:002006"  
                   /codon\_start=1  
                   /transl\_table=11  
                   /product="hypothetical protein"  
                   /protein\_id="Prokka:OIDGCHHC\_00071"  
                   /translation="MYHYPKVQLEFKNFKMTLNPSPKDMIKIVDDHQPKLEDFKDLN  
                   VKMQKAIFDFKVAKLFGFEDRYGVILVAYSNIIFTISTTKEHIYFNFLNFISNLNSNE  
                   KQKYLRLASTKDLEKQIFEEKLKFIKHYDDFYDYLIRIGYLDKGAWYKGMANIYKII  
                   IYYFTYDMPKNLKKFYSLEDKKLALAKMKRSYEIFNNLDLNSTSKIPSIANKNWRNAF  
                   KDFSNASYNWINEIQKALDECK"  
   gene          741..842  
                   /locus\_tag="OIDGCHHC\_00072"  
   CDS           741..842  
                   /locus\_tag="OIDGCHHC\_00072"  
                   /inference="ab initio prediction:Prodigal:002006"  
                   /codon\_start=1  
                   /transl\_table=11  
                   /product="hypothetical protein"  
                   /protein\_id="Prokka:OIDGCHHC\_00072"  
                   /translation="MNANENNANNENNTINIEESIKEALRGARNCRK"  
   gene          874..2343  
                   /locus\_tag="OIDGCHHC\_00073"  
   CDS           874..2343  
                   /locus\_tag="OIDGCHHC\_00073"  
                   /inference="ab initio prediction:Prodigal:002006"  
                   /codon\_start=1  
                   /transl\_table=11  
                   /product="hypothetical protein"  
                   /protein\_id="Prokka:OIDGCHHC\_00073"  
                   /translation="MQVSDGATNLFNPSPTKQTIQPYIQKIQVITDKVDNRLKFVEYT  
                   LEYINNGDTRVVIKLGKEVLEDKILTKGLEISKDIALIAMKSVPKGKTPGLGIAIFAG  
                   GSIISYFFADEIEDLAKELFFNKNNIFYRTNKAVEQFFTPPIKCPKSSEWPTGECKSI  
                   DVIFNEMQIILGKSLFPHYPYSYSKEYKFALARKKELITKTSIASNSYNFMDEEYLK  
                   NIQDLQEIQIINQEEQKYQLALKFYKEDNKIKNEIFNPLFKTLNENLSFQLKQERNT  
                   FINPNQLSIISTKKYSLKTLNLQDINNIRINSEFAYLRALFLCESFLVLNNNDEVLL

NEKITKEILECNEDEYILFILHKDKLNDTYLQARKELYKSIDEFKRLGFKDLENAYQT  
YINSLIINKEINSKDENKEINKNLNQDENSQENNIKENTSSIIKNTNSKNPSSLILK  
QKDISINQEINNTKEQDFNLLFDKIIIQNNIIFKGKKIA"

gene

2336..3205  
/locus\_tag="OIDGCHHC\_00074"

CDS

2336..3205  
/locus\_tag="OIDGCHHC\_00074"  
/inference="ab initio prediction:Prodigal:002006"  
/codon\_start=1  
/transl\_table=11  
/product="hypothetical protein"  
/protein\_id="Prokka:OIDGCHHC\_00074"  
/translation="MLKISKRISTIVFIVLVFIAVSSVYEFIHEALKFKEDNESKAR  
ENLSALIKWSENEGKEELEYAKKLNKETYNQEKVTQMIKLNKMIQTGIEDIRILSSY  
YPVEEDVELMRQAGHVISDSNTDIIILYLLDNEKTFIGHQTYFLDKERFKIFEDLFF  
LSTRLEEDFLKKDIDKFDSFDVIRIGMYINALIGYNRASTDMYLSFSDYICDLNTP  
KTMTILNGMSQINTAIDRILLFFNKELEKYTDDYSKMQLKMIYNFKKLKLGQKQINE  
LKSIQSKLKECKQ"

ORIGIN

```
1 ttattctcct ttatatacga tttattgggg aatgtatcat tadcctaaag ttcaactaga
61 atttaaaaac tttgaaaaaa tgactttaaa tccaagccct aaggatatga ttaaattgtt
121 agatgatcat cagccaaaat tagaagattt taaagattta aatgtaaaaa tgcaaaaggc
181 tatttttgat ttttaaggtgg ctaaattatt tggatttgag gataggtatt atggggttat
241 cttgtagacc tacagcaata tttttacaat atcaacaacc aaggaacata tttatttcaa
301 ttacctaat ttcataagca atttaaactc aaatgaaaaa caaaaatacc taagcttaag
361 agcatctact aaagatttag aaaaacaaat ctttgaagaa aaacttaaat ttataaaaca
421 ttatgatgat ttttatgatt atttagagcg tataggttat ttggataagg gagcttggtt
481 taagggaatg gcaaacatat ataaaattat aatatattat tttacctacg atatgcaaaa
541 aatccttaa aaattttact ccctagaaga taaaaaatta gcgcttgaag aaatgaaaag
601 aagctatgaa atattcaata atttagattt aaattcgact tctaaaattc ctagcatagc
661 taataagaat tggagaaatg cttttaaaga tttttctaag gcaagttata attggataaa
721 tgaatccaa aaggcttttag atgaatgcaa atgaaaacaa tgctaataat gagaataata
781 ctattaatat tgaagaaagt ataaaagaag ctttaagagg ggcaagaaat ttagaaaagt
841 agtagagaag agatagggaa agcaaatacc tcattgcaag tcagcgatgg tgctactaac
901 cttttcccca actccccac caagcaaac atacaacctt atatcaaaa aattcaagtt
961 attacagata aggtagacaa tagattaaaa tttgttgaat atacactaga atatattaac
1021 aatggcgata caactagagt tattattaaa ttaggaaaag aagtcttaga agataaaatt
1081 cttacaaaag gtttagaaat ttccaaagat atagcactta ttgcaatgaa atctgtacc
1141 aaaggcaaaa ctcttttagg catagctatt tttgctggag gaagtattat atcttatttt
1201 tttgctgatg aaattgaaga ttttagcaaaa gaattatttt ttaataaaaa taacattttt
1261 tatcgtacca ataaagctgt tgagcaattt ttcacacctc ctatcaaatg tccaaaaagt
1321 tcagaatggc caactggaga gtgtaaaagc atagatgtaa tcttcaatga aatgcaataa
1381 atccttggaa aatccctctt taccccacac ccctacccta gctattccaa agaatacaaa
1441 tttgccctag caagaaaaaa agaacttata actaaaacaa gcatagcttc taattcctat
1501 aattttatgg atgaagagta tttaaaaaac atacaagatt tacaagaaca agatcaaatc
1561 atcaatcaag aagaacaaaa atatcaactt gctttaaaat tttacaaaga agataataaa
1621 atcaaaaatg agatttttaa tcctttattt aaaaccttaa atgaaaatct aagctttcaa
1681 ttaaaacaag aaagaaatac ttttataaat ccaaaccaaa gtttaagcat tatctcgact
1741 aaaaaatact cattaagac tttaaattta caagatatta ataatatccg catcaattca
1801 gaatttgctt atttaagggc tttgttttta tgtgaaagtt ttttagtttt aaataataat
1861 gatgaagttt tattaaatga gaaaataact aaagaaattt tagaatgtaa tgaagatgaa
1921 tacattcttt ttattctcca caaagacaaa ttaaagcaga cttattttaca agcaagaaaa
1981 gagctttata agagtattga tgaattttaa agacttggtt ttaaagattt agaaaatgct
2041 tatcaaactt atattaattc tttgattata aataaagaaa taaatagtaa agatgaaaac
```

```

2101 aaagaaataa ataaaaattht aaatcaagat gaaaattcaa atcaagaaaa caatataaaa
2161 gaaaatacaa gcagtataat aaaaaataca aattctaaaa ataatccttc ttttaattta
2221 aaacaaaaag atataagtat aaatcaagag ataaacaaca caaaagaaca agactttaat
2281 cttttatttg ataagattat aatacaaaac aatattattht ttaaaggtaa aaaaattgct
2341 taaaatatca aaaagaattht ctactatagt ttttattgta ttggttttta ttgcagttgt
2401 tagtagtggt tatgagttta tccatgaagc tctaaagttt aaagaagata atgaaagcaa
2461 agcaagagaa aatcttagtg ctttaataca gtggagtga aatgaaggca aagaagaatt
2521 agagtatgct aaaaaattaa acaaagaac ttataatcaa gaaaaagtta cgcaaatgat
2581 tattaataat cttaagatga tacaactgg tattgaagat ataagaattht taagttctta
2641 ctatcccgtga gaagaagatg ttgagcttat gagacaggca ggtcatgtta tttcagactc
2701 aaatactgac attatacttht atctthttaga taatgaaaaa actthttatag gacatcaaac
2761 ttattthttta tttgataagg aaagattthta aattthttgaa gattthtttat tttthtttaag
2821 cactcgttta gaagaggatt ttttgaaaaa agatattgat aagtttgata gctthtgatgt
2881 aattagaatt ggaatgtata ttaatgctct aattggctat aatcgcgcac ctactgatat
2941 gtatttgagt gaatthttctc aagattatat ttgtgattta aacacccta aaactatgac
3001 aattthtaac ggtatgagcc aaattaatac tgctattgat agaattthtat tattthttcaa
3061 taaagaatta gaaaaatata ctgatgatta ctcaaaaatg caattagaaa aaatgatcta
3121 taattthtaa aaactcaaac tcggtcaaaa acaaatcaat gaactthaat ccatacaatc
3181 taaactaaaa gagtgtaaac aatgaatgaa gaattgcaaa aagaagaatt aaatgaaaca
3241 gaaaaagatt tgcaacttcc tthtaaaagat gcaggtgtag atgaaatagg agaaaaacta
3301 cttaaagaaa tagaagatgc agataaaaca gaaaattthta tgcaccaaaa tgaagttcaa
3361 gcctggaaaa gtgctactgg atthtataagc aatacaaacg atacaatatc tagctthaac
3421 aaaaacctcg aacctacct actcccttht aaaaatcatca taaaagagc agataatact
3481 cttagtgtaa ttgatgcttht aatagaatat caaaaaaca aagatggctt aaaggttatt
3541 gtaaaattht gttctgaaat tatagcttca caactthttg caataggaac aagaatggta
3601 gtccaagcag caatthtctgc tthttagtagc gtggctattht gcacaggcag tataatattht
3661 ggaatthtag caggtgttgc tattgttgcg gctggaatag cagctcttht gtggattaat
3721 tctaaaatag aagactgggt aaaaagaagc ggtatthtct ttattgattt catgagagaa
3781 tttgaaactc atthtaagttc tgaagaaaaa tattattata atthtagcaca ttgtcataaa
3841 acacaaatta gaaatatgca aagaattcaa ttatattaca atggcaaaat ttcagaagat
3901 ttaaaaaatt attattatcc tthttatgac tthtaaaaaag ctctatact tgatggcaaa
3961 gatattatta aaaaaatcaa tgagttgcaa aataattaca aaatattaag ccaaaagat
4021 acaatagaca ctattcatat aagttcaaaa cttatthttat taaaagcttht atatthttgt
4081 gaaagttthta ctgaatthaa acaagatgat aaagttctat gggatgaaaa aagtataaaa
4141 gagtcatttc ctacgattc tagttthttat attatattct tactacaca ggataaaatc
4201 acagatactt atthtaaaagc aagaaaagag ctttataaga gtattatagc atthtaatcaa
4261 attcaaaata agaatatatt agaacaaaat aaagaagatt ttcaagaata caaccaatc
4321 tctcactcta aaaacctaaa ccatttcatc ttagaaaaa aagataaaaa taaaagaatt
4381 atctthttta ataatgcttc atcgatgtca aattthaatcc atatthtatga taatcattgt
4441 gatgtat

```

//

```

LOCUS      OIDGCHHC_6                4184 bp    DNA        linear      12-APR-2021
DEFINITION Campylobacter species strain strain.
ACCESSION
VERSION
KEYWORDS   .
SOURCE     Campylobacter species
  ORGANISM Campylobacter species
            Unclassified.
COMMENT    Annotated using prokka 1.14.6 from
            https://github.com/tseemann/prokka.
FEATURES   Location/Qualifiers
            source                1..4184
            /organism="Campylobacter species"

```

```

        /mol_type="genomic DNA"
        /strain="strain"
gene     97..228
        /locus_tag="OIDGCHHC_00075"
CDS     97..228
        /locus_tag="OIDGCHHC_00075"
        /inference="ab initio prediction:Prodigal:002006"
        /codon_start=1
        /transl_table=11
        /product="hypothetical protein"
        /protein_id="Prokka:OIDGCHHC_00075"
        /translation="MPYLLSLSDEEFEKIIFHVSGFSEIDTTFLEAMELRKEKKDE"
gene     221..2314
        /locus_tag="OIDGCHHC_00076"
CDS     221..2314
        /locus_tag="OIDGCHHC_00076"
        /inference="ab initio prediction:Prodigal:002006"
        /codon_start=1
        /transl_table=11
        /product="hypothetical protein"
        /protein_id="Prokka:OIDGCHHC_00076"
        /translation="MNENIYGSLEFYKSTQSTPSDKRDLGVFGDVPYALGITEGFA
TKAFEKEIVKFGIKHNSHIATMMHSKIIMNFGILNFFLAKAEGKSNVRALGETGVGIM
IGIGIELTMDNTSIGAKIKQGGYVAKQTLTQTSRVASNAATKIASRVASNIAARAG
VSILSRIAAGAATGAAVGSFPPIVGTVVGAVVGTLVAGFFNDLIFGDEDEELKKQEEA
KEYLEEKLDKEMHKIINYLITHQYIELRVLNEDEAEKLCKEISDINSAYFKTILLML
SFPYYLDKDEQSYKEAQEKNP TIIRIQPIANALNIKIEINECF LAKNGEALKNKEIYV
YNHRFDRVVTKAMSDDEGKIVFENVYVGKESTIDKISFIIDRENFNEDNFYESVLKYA
PMFNVQKKHKQEGQAFIGKMF FSFTYAQEI MQDNEVLKLEALRNNFHIVFDYEVKQE
ESYKNYIILSYLVFDVKEDIEEYIRHITIENRAF RGLELLGRGWKNQYSIKDEWRDKG
VVFAYFNSQKFTPYKMAFIDKPIVILDIEKFDKENILEDIKFHFKTLAKAYKIFVI
DL DANTQIQEKKSIVNNIKNTQNL ELLYLQLKLFDDKDTNKCKVQYFHNNENKYANQE
MKWIEYCKKQFNALNNKDNPIYKNKNSFDMEVPFVSISFGSLIYDKERLAKKGVRQIF
GVGLAESCRRYFYEK"

```

ORIGIN

```

1  gtcaagaat  acctgaacc  tggtttattc  agtgatggcg  atgatccaac  aaaagattgt
61  tttgaaaga  ttaatgccat  tataaacct  catgtaatgc  cttatttatt  aagcttaagt
121  gatgaagaat  ttgaaaaaat  cattttccat  gtaagcggtt  ttagcgaat  tgatactact
181  ttccttaaag  aagcaatgga  actcagaaaa  gagaaaaaag  atgaatgaaa  atatttatgg
241  aagtttagag  ttttattcca  aagaaactca  aagcactcct  agtgataaaa  gagatttagg
301  agtatttgga  gatgttgctc  cttatgcctt  aggcattaca  gaaggttttg  ctactaaagc
361  ttttgaaaa  gaaatagtga  agtttgcat  aaaacataat  tcgcatattg  cgacaatgat
421  gcattctaaa  ataataatga  attttggaat  attgaatfff  tttctggcta  aagcagaggg
481  aaaatccaat  gtaagagctt  tgggtgaaac  aggtgttggt  attatgattg  gaattggtat
541  tgaattgacc  atggataata  cttctattgg  ggcaaaaata  aaacaaggtg  gtgaatatgt
601  tgccaagcaa  accttaactc  aaactagcag  ggttgcttct  aatgccgcaa  ccaagatagc
661  tagctcaaga  gtagcatcta  atatcgcagc  tagagctggc  gtatccatac  tttctcgat
721  tgccgcaggt  gcagcaactg  gagcagctgt  aggctcgagc  tttcctattg  ttgggacagt
781  ggtgggtgca  gtagtgggaa  cacttgtagc  aggttttttt  aatgacttaa  tttttggcga
841  tgaagatgag  gaattaaaaa  aacaagaaga  agccaaagag  aaatacttag  aggaaaaatt
901  agatgaaaa  atgcataaaa  tcatcaatta  tctcatcact  catcagtata  tagaattaag
961  agtgtaaat  gaagatgaag  cagaaaagct  ttgtaaagaa  ataagtgata  ttaatagtc
1021  ttattttaaa  accattcttt  tgatgctaag  ttttccttat  tatttagata  aagatgagca
1081  aagttataaa  gaagctcaag  aaaaaaatcc  aactataatc  agaatacaac  ccatagctaa

```

1141 tgccttaa ataaaaatag aatcaatga atgctttcct gctaagaatg gagaagcttt  
1201 aaaaaataaa gaaatztatg ttataatca tcgctttgat agagtagtaa caaaagctat  
1261 gagtgatgat gagggtaaaa tagtatttga aaatgtttat gtgggtaaaag agagcactat  
1321 agataaaata agctttatta tagacagaga aaatttcaat gaagacaatt tttatgaaag  
1381 tgttttaaaa tacgctccaa tgtttaatgt ccaaaaaaag cataagcaag aaggacaagc  
1441 ttttattggt aaaatgtttt ttagcttcac ttatgcacaa gaaataatgc aagataatga  
1501 ggtgttaaaa ctagaggcct taagaaataa ttttcatatc gtttttgatt atgaagtaag  
1561 aaaacaagaa gaatcttata aaaattatat cattttatct tttttggttt ttgatgttaa  
1621 agaagatata gaagaatata tacgccatat tactatagaa aatagagcct ttcgtggatt  
1681 agaattgtta ggtcgtggat ggaaaaatca atacagcatc aaagacgaat ggagagataa  
1741 ggggtgtgggt ttttttgctt attttaattc tcaaaaatctt actccttata aaaaaatggc  
1801 ttttattgat aagcctatag ttattttaga tatagaaaaa tttgataaag aaaatatact  
1861 agaagatata aaattccatt ttaaaactct tgctaaagcc tataaaatct ttgtaataga  
1921 ttttagatgct aatactcaaa tacaagaaaa aaaatccatt gtcaataata taaaaagaa  
1981 tactcaaaac ttagaactgc tttatctgca acttaaactt tttgatgata aagatactaa  
2041 caaatgcaag gtgcaatact ttcacaatga aaacaaatat gctaatacaag aatgaaatg  
2101 gatagaatat tgcaaaaagc aatttaacgc acttaataat aaagataatc ctatttataa  
2161 aaataaaaac tcgtttgata tggaaagtgc ttttgtaagc atttcttttg ggtctttgat  
2221 ttatgataaa gaaagactgg ctaaaaaagg agttaggcaa atttttggag tgggtttagc  
2281 agaacttgc aggcgatatt tttatgagaa atgatttgat tttagataat taaagaatat  
2341 actacaaact ttattttacc caccttatgc taaaataaat cacataagct ataggctatt  
2401 aatcatcaac aaacccaaaa ggatcttcaa tgtcccttaa ttcttatatg agtcttgata  
2461 tattaatca tacttcaaat cccctaccct ttaaaatcac taaagccctc atcaaagaaa  
2521 gtcttgaaga gcttttttct atagaatgtg aaggcttttt tgaaagtta gaacaagatt  
2581 tttttcttt aaatacttta accaatgctt catctcatct aagcaccct acagctttta  
2641 atttcatcc taatgtttta atcgataaag aagctatctt aagtatccat aatccttatg  
2701 agaacaatac cttaaacttt gatcataatg aagtaaaaaa ctataaagga atcatcactt  
2761 atataaaata tctaggtatt aatcatgaga gtgctttaaa tatcaatgat agcacttcaa  
2821 aactaagca aataaaatac aagcattttt tttcttttaa gcttcaatca gtcttgataa  
2881 gactttcttt aaataaagcc aatcgtatct atactcatac tcatatcata gaagtgatta  
2941 aacaaccct tggtttttat caagatatct tacataaaga aattgattat tctcatatac  
3001 attttaatta tgaagaacaa gaacttatct ctcaatacaa tgaaagcgat ttagaattta  
3061 tcacaagatt agctcacaat aatggaatct ttttttatga agatgaaaac actattttatt  
3121 tttgtgatgt gtataaaaat gtaaaaaata aagaaattga gtacaatcct aatgtgaata  
3181 atattttaaa tcaagcttgt atttcttcta tctataaaga gcaaagtta agaactaatg  
3241 cttttacaca ttctagtatc aatgctaata ctcttttaa tcttttatct ttacactcta  
3301 gtaaagtcc ttatgaacaa gaacttaaca ataaagctta ttataatgaa catttttatg  
3361 agagtgaata ttcttttaca agaagtattg atttaaagac taagccttct cttaaagaaa  
3421 aaagagcctt gatcttaaat gaaagcttac tagcaaaaag taatatttat catcttagtt  
3481 tgggagattt tatcacttta aattataagg aatttaattt gagtggattg agtgatgatg  
3541 aagatactaa aagtcaagat gaagaaaaac aagataaagc ttctttgctt aaagacttta  
3601 ttattattgc caatactcaa atcttaatag atgatgcttt actagctaat tctatcaata  
3661 ctaatgatca tttaaattta aaagatttaa atttaagtaa gtcttattct aatactttaa  
3721 ctttattaaa aaagaatatt atctttactc caagttttaa agctaagcct aaagcccctc  
3781 ataactca aggtattggt ataggagaga gtaaggatat agaaagtgag agaaactata  
3841 ttataactga tgagtatgga agggttaagg taaggattaa tctttatgct aatcaagagg  
3901 aattagataa taatctttta agtgcaaca taaaaaccaa tactcatgag aatacaacaa  
3961 aactgattc taaagataat acaaacttca caaactctt taatcattta tcaagcaatg  
4021 ctataaatc ttatcatcat actcctttt taagagtagc aacaagtata gcaagcaatc  
4081 attcaggtt tttcatact ccaagagtgg gagatgaagt gattgtttct tttttagatg  
4141 atgatataga taaaccctat gtgagctcta gtttgataa tggg

//

LOCUS           OIDGCHHC\_7                           3545 bp   DNA           linear           12-APR-2021  
DEFINITION   Campylobacter species strain strain.

ACCESSION  
 VERSION  
 KEYWORDS .  
 SOURCE Campylobacter species  
 ORGANISM Campylobacter species  
 Unclassified.  
 COMMENT Annotated using prokka 1.14.6 from  
<https://github.com/tseemann/prokka>.  
 FEATURES Location/Qualifiers  
   source 1..3545  
           /organism="Campylobacter species"  
           /mol\_type="genomic DNA"  
           /strain="strain"  
   gene 62..955  
           /gene="tssI1"  
           /locus\_tag="OIDGCHHC\_00077"  
   CDS 62..955  
           /gene="tssI1"  
           /locus\_tag="OIDGCHHC\_00077"  
           /inference="ab initio prediction:Prodigal:002006"  
           /inference="similar to AA sequence:RefSeq:A0H52008.1"  
           /codon\_start=1  
           /transl\_table=11  
           /product="type VI secretion system, secreted protein"  
           /protein\_id="Prokka:OIDGCHHC\_00077"  
           /translation="MIVSFLDDDDIDKPYVSSSLYNGTNP SLVNL PFDNHQTSLS SKTI  
           GVNEEGYNELT LSNIKDKEQIYLKAQKDYDELVQHNFTQRILNDKDSKVDGIYNERIK  
           KVHTQTIDLAKNVVNGGEYLTNVGLSKDTIVGLSNTLVNGVDNKVRIAKNSHEFVGEN  
           KDIEIGANQNTIIHKDEIRNVKGENKLLIEKSLTQTIEKEFFLN VHQNLSAHIQDNTS  
           LKSNSMQTKIEEQYSLESENST FDFQTDCEVKAGNQILH QVGD TQIVTKKDCV IIKAG  
           GVEVIIDS NGLVVKGGELKAE"  
   gene 966..1781  
           /locus\_tag="OIDGCHHC\_00078"  
   CDS 966..1781  
           /locus\_tag="OIDGCHHC\_00078"  
           /inference="ab initio prediction:Prodigal:002006"  
           /codon\_start=1  
           /transl\_table=11  
           /product="hypothetical protein"  
           /protein\_id="Prokka:OIDGCHHC\_00078"  
           /translation="MKKPFYKLR FYIPCI IIIIIIFAVLAKLLYSPLYTIYW GMYHYP  
           KVQLEFKNF EKMTLN PPKDMIKIVDDYQPKLEDFKDLNVKMQKAI FDFKVAKLFGE  
           DRYFEAFIKSCAGNFV LHGKEQIYFN YLNFISGINSTSNEKQKYLNLRASTRDLERQ  
           IFEEKLKF IKH YEEFYDYLEGVGYLDKGTEYIGTAISFKTLIQNVFLS NNAQLCSFED  
           RNL MFKNM KENYEIFKNLDVKNIDDLKRNIYKKILIDMENLLNETQKALDECK"  
   gene 1768..1896  
           /locus\_tag="OIDGCHHC\_00079"  
   CDS 1768..1896  
           /locus\_tag="OIDGCHHC\_00079"  
           /inference="ab initio prediction:Prodigal:002006"  
           /codon\_start=1  
           /transl\_table=11  
           /product="hypothetical protein"  
           /protein\_id="Prokka:OIDGCHHC\_00079"

```

gene      /translation="MNANENNTSVNNENNTTINFEESIKEALRKGQEVESGKGIR"
          1897..2244
          /locus_tag="OIDGCHHC_00080"
CDS       1897..2244
          /locus_tag="OIDGCHHC_00080"
          /inference="ab initio prediction:Prodigal:002006"
          /codon_start=1
          /transl_table=11
          /product="hypothetical protein"
          /protein_id="Prokka:OIDGCHHC_00080"
          /translation="MSIYKECEVCKTKINKLQNIWNIFSGKLEIKCKNCKSKYGVSSK
IIDWIYFLFFENLLLFPPIVILNILYLGRYFSKYGLFEMIFYLSIAILLSRKSVNIIL
LLLCKLKRLENDK"

```

ORIGIN

```

1 agcaacaagt atagcaagca atcattcagg tttttttcat actccaagag tgggagatga
61 agtgattgtt tcttttttag atgatgatat agataaacc tatgtgagct ctagtttgta
121 taatgggact aatccaagct tagtaaactc tccttttaat gatcatcaaa cctccctttc
181 ttctaaaacc ataggtgtta atgaagaagg ttataatgaa cttaccctct caaatataaa
241 agataaagaa caaatttatt taaaagccca aaaggattat gatgaattag tgcaacataa
301 tttcactcaa agaattttaa atgataaaga ttctaaggta gatggaattht ataatgaaag
361 gattaaaaag gttcatactc aaaccataga tttggctaaa aatgtcaatg taggaggaga
421 atacttaact aatgtaggct tatctaaaga taccatagta ggattaagca atactttaaa
481 tgtaggagta gataataaag taagaatagc taaaaactct catgagtttg taggagaaaa
541 caaagacata gaaatagggtg caaatcaaaa tactattatc cataaagatg agataaggaa
601 tgtgaaggga gaaaataaat tattaataga aaaatcttta acccaaaca tagaaaaaga
661 atttttcctt aatgtccatc aaaatttatc cgcccatata caagataaca catctttaaa
721 gtctaattcc atgcaaacaa agatagaaga gcaatattct ttagaatcag aaaattctac
781 ttttgacttt caaacagatt gtgaagtaaa agcaggcaat caaatcctcc atcaagtagg
841 tgatactcaa attgtttacca agaaagattg tgttataatt aaagcagggtg gagtagaagt
901 gattatagac tctaattggac ttgtgggttaa aggtggagag ctttaaggcag agtaaaggat
961 aagcaatgaa aaaacctttt tacaacttta aaagatttta tataccttgt ataataatta
1021 ttataatatt tgccgtgctt gcaaaattac tttattctcc tttatatacg atttattggg
1081 gaatgtatca ttatcctaaa gttcaactag aatttaaaaa ctttgaaaaa atgactttaa
1141 atccaagccc taaggatatg attaaaattg tagatgatta ccaacctaa ctagaagatt
1201 ttaaagattt aaatgtaaaa atgcaaaagg ctatthtttga ttttaagggtg gctaaattat
1261 ttggatttga ggatagggtat tttgaagctt ttatthaaag ctgtgctggt aacttctttg
1321 ttttacatgg taaagaacaa atttatttta attatcttaa tttcataagc ggtataaatt
1381 caacttcaa tgaagaacaa aaatatctaa acttaagagc atcaactaga gatttagaaa
1441 gacaaattht tgaagaaaaa ctthaaattht taaaacatta tgaagaattht tatgattact
1501 tagagggtgt aggttatttg gataaggga cagaatata aggtacggca atthtcttht
1561 aaacattgat tcaaatgta tthttgtcta ataattgctca attatgctct tttgaagata
1621 gaaacttht gthtaaaaac atgaaagaaa attatgaaat atthtaaaat ttagatgtaa
1681 aaaatataga tgattthaaag agaaatattt ataaaaaat atthattgat atggaaaatc
1741 tcctaaatga aacccaaaag gctthtagatg aatgcaaatg aaaataatac cagtgttht
1801 aatgaaaata acaccactat caactthgaa gaaagcataa aagaagcttht aagaaaagg
1861 caagaaattg tagaaagtgg caaaggaata agataaatgt ctattthataa agaattgtgaa
1921 gthttgtaaaa caaaaatcaa taaattgcaa aatattthgga atataattctc aggcaaatth
1981 gaaataaaat gthaaaattg caaaagttht tatggtgtht ctagtthaaat tatagattgg
2041 atataatttht tthttthtga aaattthatta ctctthccgc caattgtht tthaaatath
2101 ctatatctag gtagatattt thcaaaatath ggattatttht aaatgathat tthattthct
2161 atagccattc thctthtagatg aaaatcagtc aatatttht tactthctct thgcaaatth
2221 aaaaggctag aaaatgacaa ataaaggatt aatagaacath ctthaggatg caaaagath
2281 tgctgtagat thttatath ggctthtath tthtgagath thctthagct gaattthcagg
2341 ththaaagath tggcaagaaa aaagtthttht thtctgath tththataaaa aacaagcath

```



```

2401 tgaagaattg ggcttttttag aagatgttct taaaaatgaa acttctagaa attttataat
2461 agaacattta acaaaagata ccaatgaaag acctttatat tatttagcac cattaggagc
2521 tctaacaata attagtcaaa caaccaaagt aaaaaaacta ttcataataa gcttaacctc
2581 cttatctggg aaagccactt ccactgccca ctctctctac ccctactaca aaaacataca
2641 aaattccttt acccctttat gttctataga taataaaaaat agtaatttgt taaaagaatt
2701 taattttgat agtttttctt gtaattttta taataataat attttcaatc aaagtcttaa
2761 gcatttaaat aatatacaaa atgaaaaaga atatatcaat gagtataaaa tattttttaga
2821 aaatcttaat tattttaatc aagaatataa taattataag cttgtatcta tacaagtaat
2881 caataattta aaaatagcct atatacaaaa gctatcttta caagatatta ataataattaa
2941 tatcaattca gaactttatt tgctaaaagc tttatatttt tgtgaagatt atgttttatt
3001 tgataaagat aagcaagctt tatttaataa aaacacaata aaagaattag aatttgattc
3061 tagtttttat actatctttg tctctcacia agccaaacta aacgatactt atttaaaagc
3121 aagaaaagag ctttataaaa gcataaatga atttaaaaga cttggtttta aagattttaga
3181 aaatgcttat caaacttata tccattcttt gattgtaaat aaagaaataa atagtaaaga
3241 taaaacaata aataaaaatg aaaataaaga aataaataaa aatgaaaata aagaaataaa
3301 taaaaatgaa aataaagaaa taaataaaaa tttaaatcaa gatgaaaatt caaatcagaa
3361 aagcaatata aaagaaaatg caagtaacac aaaaaaagaa gattttaatc ttttatcttc
3421 tcaactctaa aacctaaacc atttcatctt agaaaacaaa gataaaaata aaagaattat
3481 ctttttaaat aatgcttcat cgatgtcaaa tttaatccat atttatgata atcattgtga
3541 tgtat

```

//

LOCUS            OIDGCHHC\_8                            3158 bp     DNA            linear            12-APR-2021

DEFINITION     Campylobacter species strain strain.

ACCESSION

VERSION

KEYWORDS       .

SOURCE         Campylobacter species

  ORGANISM     Campylobacter species  
              Unclassified.

COMMENT        Annotated using prokka 1.14.6 from  
              <https://github.com/tseemann/prokka>.

FEATURES

```

                  Location/Qualifiers
source            1..3158
                  /organism="Campylobacter species"
                  /mol_type="genomic DNA"
                  /strain="strain"
gene             22..519
                  /locus_tag="OIDGCHHC_00081"
CDS              22..519
                  /locus_tag="OIDGCHHC_00081"
                  /inference="ab initio prediction:Prodigal:002006"
                  /codon_start=1
                  /transl_table=11
                  /product="hypothetical protein"
                  /protein_id="Prokka:OIDGCHHC_00081"
                  /translation="MFKKLALFLLPVYLLFLAGGCSYKYMDPQYYEFKKLCKDNSNK
MIVFNKDYLDLKKQFVQAMTNNINIRIKNNGIKYFYNEKLNLEIQPSNWKEIETKSRE
IKLGIGKVKEKEIEAWYIDDKNNIKYQEFKRYLYYNYSIFLEGDEGAGFHFYEYEEILD
CGDVG"

```

ORIGIN

```

1  aaaactataa attttaaac aatgtttaaa aaacttgctt tatttctttt acctgtatat
61 cttttattat tcttagcagg aggatgttct tataaatata tggatccgca gtattatgag
121 ttttaagaagt tgtgtaaaga taatagtaat aaaatgatag tgtttaataa agattatttg
181 gatttaaaaa aacaatttgt tcaagctatg acgaataatt ctaatattag aattaaaaat

```

241 aatggtataa aatattttta taatgaaaa ttgaatttgg aaattcaacc ttcaaattgg  
301 aaagaaatag aaactaaatc acgcgaaatt aaacttggaa taggaaaagt aaaagaaaa  
361 gaaatagaag cttggtatat tgatgataaa aataacatta agtatcaaga atttaaacga  
421 tatttgtatt ataattatag tatattttta gaaggcgatg agggtgctgg gtttcatttt  
481 gaatatgagg aatattaga ttgtggagat gttggataaa aaatttaaaa gcataatgag  
541 cttaagatag aaatataaaa tgagcaaaaa cattaaaaca caagaagcta aattagactt  
601 aattgctaaa ttcttagact atgctaattgt agctgatgct agttatgcga tgttgcatg  
661 gattgattat gtaaaaaaag aaaatgacaa aaaacatgaa aatgggtgata cccaaaaact  
721 aggcgataaa cacaataatc aaaattctac ttatgcaaga gctatacaag ctctgtttga  
781 acaaaataaa atagttaaaa tagaacctaa atattgtatt tctcttataa atacttgttt  
841 tgatagtaaa gaaataacat tggataatga tattagtagg gtaggattaa atgatgact  
901 tagtaaaaga actattgatt ttgtaaatag atttaaactt ttaaaacatc agcccaacac  
961 tacaagtggc tttagtgcta ctttgtttga agatactaaa gataataatc aaaagattat  
1021 agtcatacga ggaacagagc ctacaagtaa ttttagtgta gatattttgg atgctgatgt  
1081 tgatttagct ttaggcaaag ttccctataa tcaatatctt gatatgatta aattttattc  
1141 tgagtgtgtt aaagaatttc caaatattat aaaagacaaa ggtttggtaa ttgtaggtca  
1201 ttcttttagc ggagctttgg cacaactact tactctttca ttagcgagtg ttaattctag  
1261 tgctaattgt aaagaaatct acactttcaa ttcgcctggt gcaaaagaac taaaagcttt  
1321 aaatttaaat caaatttaca gaatagatgg aaaaattatc aattctgata ataaagagca  
1381 ggcatgttt tatcaataa gatcttataa atatcaaaaa agtatagaaa taaacttaat  
1441 aggatatgat tctaatttat ttcaaaatat aaaatcatac tttcatgata aaacaaactt  
1501 aaaagaacat tatatcttta taaaaacaaa tataatttat agtaaatcaa cgaattattt  
1561 ttatgatatt tttgaaattg atgaagtatt tataaattgt gttaatcagc tccttgctaa  
1621 tcttaatatc aaaaatattt tagctacaag tgataatact tatcatattg aaacagatac  
1681 tgattccgat gcttctaata caaaaggggt gatacaagat ttaggagtag atatagacgg  
1741 gaagcattat attgttaatt taggggatcg attttgggat tctcattttt tagagcctac  
1801 tatcatagaa ttaaattata ttttaaactt tatgaaaaat aaagaaattg ataactttt  
1861 agagtataat ataaataagg atgaagagct atggactttt atcaaatacc ataataatgt  
1921 tttggctacc gcaagaactc gttatgatga tcgtattttg tcatatttta gcattcctaa  
1981 actatctaag gatttttcaa attctttgga atatttgcaa attcattatt taccaaaaga  
2041 acccaaaaaa cttttatttg cagcaaatat tcaaggtttc tcatctacgc aattgcaagc  
2101 tttggaggaa tataaaataa aaaaagctaa atatgatgag gagttaaaat ggtatgaact  
2161 ttataaagta aaatatgaaa gagaacaaca aatttttaat cagaaattta aagagtattt  
2221 ttcagaaata attttttatc aaaatagact ctattctcat aaaaaaacac aagagaaaat  
2281 tatattaat gctataatac aacaaattaa tcaaaaagat ataacatatt ttaatttgta  
2341 ttctgtgata gaatttttaa aagaaaacaa ggcttattat aaatatatag atttaaatga  
2401 aatccaagat ttaattttta atgatttaga taataaattg ggttattttt attgccttta  
2461 tgtatgtata aatttaatag tattaagaga agataaaaaat acttatttca cccaagctac  
2521 cgctataaac aatctaggct ataattctac tttcacaag atcttcatcc tagataaaga  
2581 aaaccttaat aatacctatc ttgatgctag aaaaaggctt tataaatcta tcaatacttt  
2641 aaaagaaaaa agaaatgaaa aaataaaaga tatccaagcc tatttagata aagaaatttc  
2701 cttacaagat aatctaaata atcaagactt taactactaag gaaaatgatg ttaatttaat  
2761 tttaaacgaa gtatttaaca tagagcaatt ttatgataaa aataccaata ccatagtatt  
2821 aaaaacaaat aatataaaaa tcatattctt agataaagta aatttacaag atttgcaaga  
2881 taattctaac aatacttctt tcatctctat gtcaaattta atccatattt atgataatca  
2941 ttgtgatatt ttcacaaaag atagaagtgt tttggatata aagaacatag aagaaaaata  
3001 tcaaatagat tttaaaagtt tagatacaaa aatcttccta aactccacc tccttacagg  
3061 ctcaaatgaa ctttctaata atccttttta ttttgagaaa ttagatcaag ataatactat  
3121 aaaacaagat ataccagtt attatttttc tcctaaag

//

LOCUS            OIDGCHC\_9                            2845 bp     DNA            linear            12-APR-2021  
DEFINITION     Campylobacter species strain strain.  
ACCESSION  
VERSION

KEYWORDS .

SOURCE Campylobacter species

ORGANISM Campylobacter species  
Unclassified.

COMMENT Annotated using prokka 1.14.6 from  
<https://github.com/tseemann/prokka>.

FEATURES Location/Qualifiers

source 1..2845  
/organism="Campylobacter species"  
/mol\_type="genomic DNA"  
/strain="strain"

gene complement(77..217)  
/locus\_tag="OIDGCHHC\_00082"

CDS complement(77..217)  
/locus\_tag="OIDGCHHC\_00082"  
/inference="ab initio prediction:Prodigal:002006"  
/inference="similar to AA sequence:RefSeq:CKG86746.1"  
/codon\_start=1  
/transl\_table=11  
/product="hypothetical protein"  
/protein\_id="Prokka:OIDGCHHC\_00082"  
/translation="MRCIKIFKDYQKFTPYGLDFKLYSKDFITKLDFKDKAYNVLYNT  
GV"

gene complement(204..698)  
/locus\_tag="OIDGCHHC\_00083"

CDS complement(204..698)  
/locus\_tag="OIDGCHHC\_00083"  
/inference="ab initio prediction:Prodigal:002006"  
/inference="similar to AA sequence:RefSeq:CKG86821.1"  
/codon\_start=1  
/transl\_table=11  
/product="hypothetical protein"  
/protein\_id="Prokka:OIDGCHHC\_00083"  
/translation="MGDSIMLSTSLGLVGFIFAFTNIKFYLTTLVSVLIVFSILNYWIK  
INIKFVKSYFSIYFIIFFTAIVIIIFYLTYGIETSKDLALLSSLEAKELSPQEYKARN  
YFGFLTCMTMFFLVITFIILPCLLQAYLFKCYSTEERKRLKLSWFIGVCNIFLLIASV  
YAMY"

gene complement(699..2234)  
/locus\_tag="OIDGCHHC\_00084"

CDS complement(699..2234)  
/locus\_tag="OIDGCHHC\_00084"  
/inference="ab initio prediction:Prodigal:002006"  
/inference="similar to AA sequence:RefSeq:CKG86849.1"  
/codon\_start=1  
/transl\_table=11  
/product="hypothetical protein"  
/protein\_id="Prokka:OIDGCHHC\_00084"  
/translation="MDEGLFWENLVSTEYIGAMQEKISNESFSNNISFRSLEYDATVL  
PAELECCYNEFKYHQKSNEIAALGWAVSYQLQALWQNSPKIDTIQNYHLPIKQNKPN  
NPQAEQRLKEIQNFLQSKGIEPLILHYTPYPKNTQTQEMKRLRQNSERFSRHVDNKTN  
EVREEKRSIKFYTTLDWDKFYSHFPIIKRLSKKFHTKEDIYTQNFTKQIEIILQKTHN  
ILTLKNLSQGEYKFDFAIDIKENRSDKNEESYIIKENDEMPKDYKRVLACKPYELDT  
LNCQYIGAGDDEFRRQIRQNLEVNIRQNFDFIEFSWSLIKTYLRFNPGTRKHMLTYDT  
FEIGKQTYDELMQDLSLYACSGKFSFNFPVPSKLSIKKEIQGDREKVLVYRVDLEMLVYVY"

DSFDFLDQGHFDDEGNFIKLGQPVGAWDFNEKSFSIWGSTRQMETYKPKKEYLFFIPQ  
ITFADILQSPKTKQYYLYNQDYQDYQKFTPYGLDFKLYSKDFITKLDKFKAYNVLYD  
TGV"

gene complement(2436..2717)  
/locus\_tag="OIDGCHHC\_00085"  
CDS complement(2436..2717)  
/locus\_tag="OIDGCHHC\_00085"  
/inference="ab initio prediction:Prodigal:002006"  
/codon\_start=1  
/transl\_table=11  
/product="hypothetical protein"  
/protein\_id="Prokka:OIDGCHHC\_00085"  
/translation="MLLWFGYFFIPLWQSSFKFESLLENLKNREVIYNQEIYDRVK  
GKNNAIRVKFVENNIGLRIQKVEYQYYKIVTNILYKNYYTYGWLYMYVC"

ORIGIN

```
1 aaaatthttat attagtaaaa gcaaaaataa atccaaataa accccaaaaa atagaaaatg
61 taatatcttc tcccatttaa actcctgtat tataaagcac attataagct ttatctthtaa
121 aatcaagcct ggtgataaaa tctttactat aaagthttaa atccaaacca taaggagtga
181 atthttggta gtctthaaag atthtaatac atcgcataca cactcgcaat taataaaaag
241 atattgcaca caaacctat aaaccaactt aatthtttgc gthtttcttc tgtgtcataa
301 cthttaaata aataagcttg caataaacia gggagtataa taaatgtgat tactaaaaaa
361 aacatagtca tacaagtcaa aaatccaaaa taattacgtg cthttatattc ttgtggtgat
421 aatthcttag cttctagaga gctaagcaat gcaagatcct tagaagthtc aataccatag
481 gtaagataaa atatgataac aatagctgta aaaaagataa taaaatataat tgaaaaaataa
541 gathttacia atthctthtt atthaatctta atccaaataa thaaaataga aaagacaata
601 agaacactta aagtggtaag ataaaaatth atattagtaa aagcaaaaaat aaatcctacc
661 aaacctaaag aagtagaaag cataatacta tctccattt aaactcctgt atcataaagc
721 acattataag cthttatctth aaaatcaagt ttagtgataa aatctthtact ataaagthta
781 aaatccaaac cataaggagt gaatthttgg tagtcttggt aatcttgatt gtaaagatag
841 tattgthttg thtttgggga ttgtagaata tcagcaaaag thatttgtgg tataaaaaat
901 aaatattcct ttggthttata agthttccatc tgtcttgtag aaccccaaat gctaaaactc
961 thttcattaa aatcccaagc cccaacaggt thtcttaatt tgataaaatt tccctcatca
1021 tcaaattcat gtccttgatc taaaaaatca aagctatcat aaacataaac aagcatttca
1081 tcaacgcggt ataatacctt thccctatct cthtgaattt cthttthtaat gcttaattth
1141 gaaggaacia aatthaaaaga aaatthacca ctacaagcat aaagagatag atctthgcata
1201 agthcatcat aagthttgtht cccaatctca aatgtatcat aagthtaacat atgthttctt
1261 gthcctggat tgaatctthaa atatgthttta ataagccaag aatgagaaaa thctatatca
1321 aatthgcctg caatathttac thctaaatth tgccgaatth gthctgaagaa thcatcatca
1381 cccgcaccta tatattgaca atthtaaagta tcaagctcat aaggtthgca agctaaaacg
1441 cgthttataat cthttggcat thcatcattt thtttaatga tgatataaga thctthcattt
1501 thatcgcttc gathttcttht tatatcgatt gcaaaatcaa atthtgattc thctthgggat
1561 aaatthttta atgtcaaaat atthtagatt thttgtaaga thattthctat thgctthtgta
1621 aaatthtgag tgtatatgtc thctthttgta tgaatthttt tactthagtct thttattata
1681 ggaaaatgag aataaaaactt atcccaatct agcgtagtgt aaaatthtaat agaacgcttht
1741 thctthcttht cthctatthgt thttattatct acatggcgcg aaaaacgctc tgaatthttgc
1801 ctthagtctth thcatctcttg thtttgtgtg thttthggat aaggggtata gthcaaaaata
1861 aggggtthcta tacctthtact thgtaaagaaa thttgtatth cthtttagtct thgtthctgct
1921 tggggattat taggctthatt thgtthttata gggagatgat aatthttgat tgtatctatc
1981 thagggtctat thtgccacia thgttgaagt tgataactaa cagcccaacc caatgctgct
2041 atthcattat tgctthtttg atggthactta aatthcattgt agcaacactc taatthccgca
2101 ggcaaaaactg thgcatcata thcttagagat ctaaaactta thttatthtga aaatgattca
2161 thtgatathh thctthtgcat thgtctctata thttctgttg aaacaagatt thcccaaaaa
2221 agthctthcat ccatcaththt atctthattgt thttatathh thtagaaatt thtcaagtat
2281 gthttcattt aaatthtacia ataactaatc cagcatatth taacatathh ataaagthttc
```

```

2341 atatatttgg cttgtttttt atgcattagt agtctctttc ttttattttt ttcttatatt
2401 catcaatgcc atcacaacct aatattcttc catttttagc aaacatacat atatagccaa
2461 ccatatgtat agtaattttt atataaaata tttgttacia ttttataata ttgatattct
2521 acttttttga tccttaatcc tatattgttc tcaacaaatt ttactcttat agcattattt
2581 ttgcctttaa ctctatcata aatctcttga ttataaatca cttctctatt ttttaaattc
2641 tcacacaaac tctcaaattc tttaaaacta ctttgccatt caagaggat aaaaaagtat
2701 ccgaaccaa gaagcataaa ggtcttaatt ttttatagtt ttcttcacc atatatgctt
2761 taaattgatc ttcatagtat gcaaattcgg gtttatcgtc gaaattaaaa tcataatctg
2821 ggtcttttac atcataatta taatc

```

//

LOCUS           OIDGCHHC\_10                           2521 bp     DNA           linear           12-APR-2021

DEFINITION     Campylobacter species strain strain.

ACCESSION

VERSION

KEYWORDS

.

SOURCE         Campylobacter species

  ORGANISM     Campylobacter species

  Unclassified.

COMMENT        Annotated using prokka 1.14.6 from  
<https://github.com/tseemann/prokka>.

FEATURES       Location/Qualifiers

  source

  1..2521

  /organism="Campylobacter species"

  /mol\_type="genomic DNA"

  /strain="strain"

  gene

  74..571

  /gene="trxB\_3"

  /locus\_tag="OIDGCHHC\_00086"

  CDS

  74..571

  /gene="trxB\_3"

  /locus\_tag="OIDGCHHC\_00086"

  /inference="ab initio prediction:Prodigal:002006"

  /inference="similar to AA sequence:RefSeq:CKG87041.1"

  /codon\_start=1

  /transl\_table=11

  /product="thioredoxin reductase"

  /protein\_id="Prokka:OIDGCHHC\_00086"

  /translation="MLPFIDEIMGVDWVIDLNRYKFALDEEGRIIWALYDDIEKGLK

DPRDVDSTSESKEFDHYMDGYKNGMVTRFDVDIRNERDERSAKLTMDTLVLSAKLAA

LTPPQGYPNAPRYYSPELEIIYKRHKLDKLLDPRIPIAIRYNFPRELRAKILKFGE

NGIKD"

  gene

  complement(576..1475)

  /locus\_tag="OIDGCHHC\_00087"

  CDS

  complement(576..1475)

  /locus\_tag="OIDGCHHC\_00087"

  /inference="ab initio prediction:Prodigal:002006"

  /inference="similar to AA sequence:RefSeq:CKG87069.1"

  /note="Uncharacterized conserved protein%2C contains FHA domain"

  /codon\_start=1

  /transl\_table=11

  /product="hypothetical protein"

  /protein\_id="Prokka:OIDGCHHC\_00087"

  /translation="MIEKEELGITIENYDECISGSKAFVFDTKGGTIGSGDDCTFRIQ

DKLEQIKNTHAIVSYEEGSFTIAAFEDSDIYYNKSFSRMPSGYEIIISIGDIFKIGNL  
EFRFVDAKSIEESIKENKKYLEDIEKRNHFEIEIEPRGKTSINFDKNEELKEILKNN  
NYKFIEEEKADDSFLKEIIQRDPNSLGYENILKSLVKNLKDIKTKQSSKLNNDYSPI  
SIKDFESIINNIPLIKSTRLINILALSIAKELYTPIFEEMEENMFIKYLEAAIQNNI  
KEDKILFENLTLKALEKYIKDFE"

gene complement(1472..2518)  
/locus\_tag="OIDGCHHC\_00088"  
CDS complement(1472..2518)  
/locus\_tag="OIDGCHHC\_00088"  
/inference="ab initio prediction:Prodigal:002006"  
/inference="similar to AA sequence:RefSeq:CKG87105.1"  
/note="Uncharacterized protein conserved in bacteria"  
/codon\_start=1  
/transl\_table=11  
/product="hypothetical protein"  
/protein\_id="Prokka:OIDGCHHC\_00088"  
/translation="MDLYAYQQSCVKTFAYFLFLVQYYPSLSFLENLKEFCKYHRITN  
VSNKIIDFSSNNNQSAEEKIAYALDGNKDANDPFTVFQMSIKKLPDLERYYNQLSDH  
SWNLIENYGISLFNTAWINEVYNPFINDIAPFYFNEESTANLSMDSFKTFFGRNGVL  
NSFYKKYLNNVLVKRKNYSINSQFASKLNFSEFLDFITNAGNLSLMLNANDNIRV  
NFTIQSLDLSADFSFVKLGYNKNKIQYDHTLDQTLQIVAEEFNNGTSLNFTAYNYSNP  
NLNYTKSYKGEAWYKF IKDNKNNSTYSIMFNNKNLYDFEIIINGASDLNNIVYILN  
NLKIVENITGVNKQ"

ORIGIN

1 gatacataaa aatcctttaa gggctaaatt agtaaaagat ttagctaaaa ctatacagcc  
61 tgatgaattt ggtatgctac cttttataga tgagattatg ggagtagatt ggggtgattga  
121 tttaaatcga tataaatttg ctcttgatga agaaggtaga atcatttggg ctttatatga  
181 tgatattgaa aaaggtaaat taaaagatcc aagagatgtg gattctactt ctgaaagcag  
241 gaaagaattt gatcattata tggatggata taaaaatgga atggtaacta gatttgatgt  
301 agatattaga aacgaaagag atgagagatc tgctaaactg actatggata ccctagtatt  
361 aagtgcaaaa ctgcagccc tcaactcctc tcaaggttat cctaagtctc caagatacta  
421 tagccctgaa agactagaaa ttatttataa aagacataag cttgataaac tccttgatcc  
481 aagaatccct gctatttata gatataattt cccaagagaa cttagagcta agatactcaa  
541 atttggcgaa gaaaatggca ttaaagatta aaaaatcact caaatcttt aatatacttt  
601 tccaatgctt ttagggtaag atttctcaaaa agaactcttat cttctttgat attgttttgt  
661 atggcagctt caagatattt aataaacata ttttcttcca tttcttcaaa gatgggagtg  
721 tataattctt ttgcgattaa actaagggct aaaatattaa tcaatcttgt ggatttgatt  
781 aaaggatat tattaataat actttcaaaa tctttaatac tgataggaga ataactatta  
841 ttttaatttag agctttgttg ttttgtttta atatctttta aattttttac caaacttttt  
901 agaatatttt cataccctaa tgaatttgga tctctttgaa tgatttcttt taaaagcta  
961 tcatctgcct tttcttcctc gataaactta taattattat tttttaaaat ctctttcaac  
1021 tcttcatttt tgtcaaaatt tatacttggt tttcccctag gttcaatttc aatttcatca  
1081 aatgattgct gtttttcaat atcttctaag tattttttat tttctttgat actttcttca  
1141 atgctttttg catccacaaa tctaaattct aaattaccga ttttaaaaat atcgcctatg  
1201 ctaattatta tttcatagcc acttggcatt ctagaaaagg acttgttata ataaatgtca  
1261 gaatcttcaa aagctgcaat tgtaaaagat cttcttcat aagatactat ggcattgggta  
1321 tttttgattt gctctagttt atcttgaata cgaaaagtac aatcatcacc acttcctata  
1381 gttccaccct ttgtatcaaa tacaatgct ttagaaccac taatgcattc gtcataattc  
1441 tcaatagtaa ttcctaattc ttcttttct atcattgttt atttaccct gtgatatttt  
1501 ctactatttt aagattattt aaaatataaa ctatattatt taaatcacta gcaccgttaa  
1561 taatttcaaa gtcaaaatat aagtttttat tattattaaa cataatgctg tatgtagaat  
1621 tgtttttatt atcttttata aacttatacc atgcccattc tcccttatat gattttgtat  
1681 aatttaaatt aggattggag tagttgtagg ctgtaaaatt taaacttggt ccattattga  
1741 attcttctgc tacaatttgc agggttttag caagagtatg atcgtattga atatttttat

```

1801 tgttgtagcc aagctttaca aaggaaaaat ctgcacttaa atcaaggcctt tgaatggtaa
1861 aattaactct tatattatca ttagcattca gcatgagact tgagagattg cctgcattgg
1921 tgataaaatc taaaaattct ttagagaaat ttaattttga agcaaattga gaattaatag
1981 aatagttatt ttttcttttt actaaaacat tattcaagta tttttataa aaactattta
2041 atactccatt tctgccaaaa aatgttttaa agctatccat actcagatta gctgtgcttt
2101 cttcattaata aggataaaat ggtgcaatat cattgataaa tggattatac acttcgttaa
2161 tccaagcagt attaaataat gaaataccat agttctcaat caaattccaa gaatgatcag
2221 aaagctgatt gtaatacctt tctaaatcac taggtaattt ttttatactc atttgaaata
2281 cagtaaaagg atcattggca tctttattgc catcaagagc atatgcgatt ttttcttcgg
2341 cgctttgggtt attgttggag ctaaagtcta taattttatt ggacacattt gtaatacgat
2401 gatacttaca aaactccttt aaattttcaa gaaaagatag agatggataa tattgcacta
2461 aaaacaaaaa atatgcaaat gtctttacac aagattgttg atatgcatat aagtccatat
2521 t

```

//

LOCUS           OIDGCHHC\_11                   2464 bp     DNA           linear           12-APR-2021

DEFINITION     Campylobacter species strain strain.

ACCESSION

VERSION

KEYWORDS       .

SOURCE         Campylobacter species

  ORGANISM     Campylobacter species

              Unclassified.

COMMENT        Annotated using prokka 1.14.6 from  
<https://github.com/tseemann/prokka>.

FEATURES

                  Location/Qualifiers

  source

                  1..2464

                  /organism="Campylobacter species"

                  /mol\_type="genomic DNA"

                  /strain="strain"

  gene

                  complement(483..1760)

                  /gene="trxB\_4"

                  /locus\_tag="OIDGCHHC\_00089"

  CDS

                  complement(483..1760)

                  /gene="trxB\_4"

                  /locus\_tag="OIDGCHHC\_00089"

                  /inference="ab initio prediction:Prodigal:002006"

                  /inference="similar to AA sequence:RefSeq:CKG86610.1"

                  /codon\_start=1

                  /transl\_table=11

                  /product="thioredoxin reductase"

                  /protein\_id="Prokka:OIDGCHHC\_00089"

                  /translation="MSDTYMIYAPNGLGVEVDKKTKEIYFAQSVDPVGKYTKKEYTRVF

FKAWIEIKQNSPYKDYQPIYLDPNFYTGQKSTLVEFKEQSIYLKEPIKGSIAPWTKAE

KAYYKSLKTKRERYKYLIIRSGIRSTVIDIPYDAYCNVDEKGNLINKDYKELYKEVEA

NRGMANMHKGWL FMAEWELAAGILGDIKGFIGALQLSMTGFKARTQAINFLLIQLGHE

QGFKSLYDSYAYRDL TDGIHKNPLKAQMLKDFSKNPPYDELGLMPLFDELIGVDWVID

VNKYQFAYDEKGRVNDALKDDVEKGILKDPRDIDSTPESRWGFDKEMDAYKNGMRTRF

DGDNPNHWSKEQVERFNDTLILCAKLAALTPPQGYPNAPYYSPERLEFIYKHKHLDK

LLDPRIPAIYRYNFPRELRAKILKFGGEENGIKD"

  gene

                  complement(1842..2387)

                  /gene="trxB\_5"

                  /locus\_tag="OIDGCHHC\_00090"

  CDS

                  complement(1842..2387)

                  /gene="trxB\_5"

```

/locus_tag="OIDGCHHC_00090"
/inference="ab initio prediction:Prodigal:002006"
/inference="similar to AA sequence:RefSeq:CKG86610.1"
/codon_start=1
/transl_table=11
/product="thioredoxin reductase"
/protein_id="Prokka:OIDGCHHC_00090"
/translation="MLKDFSKNPPYDELGMLPFLDELIGVDWVIDPNDYYFVYDGAKG
RVNDALKDDVEKGTLDKPRDVDSTPESREEFIDNFERYGNMRRERYTLEISNDTPETS
ANIWLETMLLEAIKALTPPQGYPSAPYYYSPERLEWIYKNHNLDRLLDPRIPIAIYRY
NFSRELRAKILKFGEENGIKD"

```

ORIGIN

```

1  agggatatatc  tataaccaca  gatcttaatc  cacttcttat  tgccaaatac  ttacatcttt
61  ctcttttagt  ttttaaagat  ttataataag  ctttttctgc  ttttagtcaa  ggagctatgc
121  ttcctttaac  aggatctttt  aaatatatgc  tttgccattc  tttaaattca  agcaaagtag
181  atttttgccc  tgtataaaag  ttaggatcta  gatataattg  tttatagtct  ttgtaggggg
241  agtttttcat  aatataataa  gattcaaaaa  ccgctttgga  atattcttga  gtataattgc
301  ctgtggggtt  aatattttct  ttaaatagta  ttttattggt  atctttttcc  acatctaatt
361  ttaatccatt  ggggtgataa  atctcataag  tttcgctcac  tatttatcct  ttcttaaatt
421  tatcccatgt  ataaaccatc  ttctatgatt  atagtagtgg  ctagtctgcc  tatgaggtta
481  ctttaatctt  taatgccatt  ttcttcgcca  aatttgagta  tcttagctct  aagttctctt
541  gggaaattat  atctataaat  agcagggatt  cttggatcaa  ggagtttatc  aagcttgtgt
601  tttttgtaa  taaattctaa  tctttcagga  gagtaataat  aaggtgcatt  aggatagcct
661  tgaggaggag  tgagggctgc  gagtttgcca  cataaaatca  aagtatcatt  aaatctctct
721  acttgctctt  tactccaatg  atttggatta  tctccatcaa  atctagttct  cattccattc
781  ttataagcat  ccatctcttt  gtcaaaccct  catctactct  ctggagtaga  atctatatct
841  cttggatctt  tgagtattcc  tttttcaaca  tcatctttta  gagcatcatt  aactcttctt
901  ttttcatcat  aggcaaattg  atatttattc  acatctatca  cccaatccac  tcctataagt
961  tcatctagaa  aaggtagcat  acccaattca  tcataaggag  gattttttaga  aaagtctttt
1021  agcatttgag  ctttaagagg  gtttttgtgt  atgccatctg  ttaaactctt  atatgcataa
1081  gaatcataaa  gacttttaaa  acctgttca  tgtcctagtt  gtatgagtaa  aaaatttatt
1141  gcttgagttc  ttgcttttaa  tcctgtcata  gaaagttgta  aggctcctat  aaatcctttt
1201  atatctccta  aaattcctgc  tgctaattcc  cattcagcca  taaagagcca  acctttatgc
1261  atattagcca  tacctctatt  ggcttctact  tctttgtaa  gttctttata  gtctttattg
1321  attaaatttc  ctttttcatc  tacattacaa  taagcatcat  aaggatatatc  tataacagta
1381  cttcttatac  cacttcttat  aattaaatat  ttatatcttt  ctcttttagt  ttttaaagat
1441  ttataataag  ctttttctgc  ttttagtcaa  ggagctatac  ttcctttgat  aggttctttt
1501  aaatatatgc  tttgccattc  tttaaattct  actagagtgg  atttttgccc  tgtataaaag
1561  ttaggatcta  gatataattg  ttgatagtct  ttgtaggggg  agttttgttt  aatttcccaa
1621  gctttaaaaa  aaactctagt  atattcttta  gtatatttac  ctacaggatc  aacgctttgt
1681  gcaaaatata  tttcttttgt  ttttttatct  accttactc  ctaatccatt  aggagcatat
1741  atcatataag  tatcactcat  cttttatcct  ttcttaattt  aacctatata  taaacctatc
1801  tctatgatta  tagtagtggc  tagtctgcct  atgcaattac  tttaatcttt  aatgccattt
1861  tcttcaccaa  attttagtat  cttagctcta  agttcccttg  agaaattata  tctataaatt
1921  gcagggattc  taggatcaag  aagcctatct  aaattatgat  ttttataaat  ccattcfaat
1981  ctttcaggag  agtaataata  aggtgcacta  ggatagcctt  gagggggagt  tagggcttta
2041  attttagctt  ctaaagcat  tgtttctagc  caaatattag  cagatgtttc  aggagtatca
2101  ttgcttattt  ccaaagtata  gcgctccctc  attccattcc  cataacgctc  gaagttatca
2161  atgaattctt  ccctactctc  tggagtggaa  tctacatctc  ttggatcttt  gagtgttcct
2221  ttttcaacat  catcttttag  ggcatcatta  actcttcctt  ttgctccatc  ataaacaaaa
2281  taataatcat  ttggatctat  cacccaatcc  actcctataa  gttcatctag  aaaaggtagc
2341  ataccaat  catcataagg  aggattttta  gaaaagtctt  ttagcatttg  agctttaaga
2401  gggtttttgt  gtatgccatc  tgttaaattc  ctatatgcat  aagaatcata  aagactttta
2461  aaac

```



```

//
LOCUS      OIDGCHHC_12                2262 bp    DNA        linear        12-APR-2021
DEFINITION Campylobacter species strain strain.
ACCESSION
VERSION
KEYWORDS   .
SOURCE     Campylobacter species
  ORGANISM Campylobacter species
            Unclassified.
COMMENT    Annotated using prokka 1.14.6 from
            https://github.com/tseemann/prokka.
FEATURES   Location/Qualifiers
  source   1..2262
            /organism="Campylobacter species"
            /mol_type="genomic DNA"
            /strain="strain"
  gene     370..510
            /locus_tag="OIDGCHHC_00091"
  CDS      370..510
            /locus_tag="OIDGCHHC_00091"
            /inference="ab initio prediction:Prodigal:002006"
            /inference="similar to AA sequence:RefSeq:CKG86746.1"
            /codon_start=1
            /transl_table=11
            /product="hypothetical protein"
            /protein_id="Prokka:OIDGCHHC_00091"
            /translation="MRCIKIFKDYQKFTPYGLDFKLYSKDFITKLDKFKAYNVLYDT
            GV"
  gene     511..1020
            /locus_tag="OIDGCHHC_00092"
  CDS      511..1020
            /locus_tag="OIDGCHHC_00092"
            /inference="ab initio prediction:Prodigal:002006"
            /inference="similar to AA sequence:RefSeq:CKG86768.1"
            /codon_start=1
            /transl_table=11
            /product="hypothetical protein"
            /protein_id="Prokka:OIDGCHHC_00092"
            /translation="MGEDITLSIFWGLVGFIFRLVTIDTILYITALSVLIVFSIINYW
            IKINIKFVKSFLVYFIIFFTAIIIIIFYLSYDLETSRGVVMLGPPEVEELSPQEYIV
            YKCSKFLIFINFIFFTITFIIFPCLLQAYLFKRYSTEEKRKKLSWFIGFLCNIIILIA
            SAYLMYIFI"
  gene     1139..1645
            /locus_tag="OIDGCHHC_00093"
  CDS      1139..1645
            /locus_tag="OIDGCHHC_00093"
            /inference="ab initio prediction:Prodigal:002006"
            /inference="similar to AA sequence:RefSeq:CKG86719.1"
            /codon_start=1
            /transl_table=11
            /product="hypothetical protein"
            /protein_id="Prokka:OIDGCHHC_00093"
            /translation="MGDSITLSIIMGMLFSILYFVIFIKNYIIIALIVLIVFSILNYW
            IKINIKFVKSFLISFIIFFTAIVIVFYLTLDLETSRGLVLLGPPEIEELSPQEYKV

```

HGYFGFLFFTSIGFCTITFFILPCLLQAYLFKCYSTGEKRKLSWFIGFVCPILITS  
MYVIYENL"

gene 1632..1763  
/locus\_tag="OIDGCHHC\_00094"  
CDS 1632..1763  
/locus\_tag="OIDGCHHC\_00094"  
/inference="ab initio prediction:Prodigal:002006"  
/inference="similar to AA sequence:RefSeq:CKG86746.1"  
/codon\_start=1  
/transl\_table=11  
/product="hypothetical protein"  
/protein\_id="Prokka:OIDGCHHC\_00094"  
/translation="MKIFKDYQKFTPYGLDFKLYSKDFITKLDKDKAYNVLYNTGV"

ORIGIN

```
1 ttttaaatta ttgatcaag attaataaa aagaatttgt aaaatcctat ttttaatat
61 cttttattat cttttttaca gctattgtta tcgtatttta tcttacttat gatcctgaaa
121 cttctagagg gcttgtatta cttggctctc cagaagttga aaaattatca ccacaagaat
181 ataaagcaca taattatfff ggatttttaa gtgggtataac tattatffff ttagcaatca
241 cttttttat actcccttgt ttattacaag cttatfffft taaatgctat agcacaggag
301 aaaaacgcaa aaaattaagt tggtttatag gatttgtgtg caatatcttt ttattaacgg
361 cgagtgtgta tgcgatgtat taaaatcttt aaagactacc aaaaattcac tccttatggt
421 ttggatttta aactttatag taaagatfff atcactaac ttgattttaa agataaagct
481 tataatgtgc tttatgatac aggagtttaa atgggagaag atattacact ttctatffff
541 tggggtttgg taggatttat ttttaggctt gttactattg atacaatact ttatattaca
601 gccttaagcg ttcttattgt cttttctatt ataaattatt ggattaaaaa taatataaaa
661 gaatttgtaa agtcttattt tttagtatat tttattatct tttttacagc tattattatc
721 atatffffatc ttagctatga tcttgaact tctagaggat atgtaatgct cggctctcca
781 gaagtgaag aattatcacc acaagaatat atagtatata agtgttctaa atttttaatc
841 tttataaatt ttatffffttt tacaatcaca tttattatat ttccttgttt attgcaagct
901 tttttatgca atattattat attaattgca agtgcatatt tgatgtatat atttatftaa
961 tttttatgca atattattat attaattgca agtgcatatt tgatgtatat atttatftaa
1021 agactaccaa aaattcactc cttatggttt ggatttttaa ctttatagta aagatfffft
1081 cactaaactt gatttttagag ataaagctta taatgtgctt tataatacag gagtttaaat
1141 gggagatagt attacattgt caattattat gggaatgta ttttctattc tttatfffft
1201 aatfffftata aaaaactata ttataatagc tttgattgtc cttattgtct tttctatffff
1261 aaattattgg atcaagatta atataaaaga atttgtaaaa tcttattffff taatatcttt
1321 tattatcttt tttacagcta ttgttatcgt atffffatctt acttatgatc ttgaaacttc
1381 tagagggctt gtattacttg gtcctccaga aattgaagaa ttatcaccac aagagtataa
1441 agtacatggg tatttcggat tttatfffft tacaagtatt ggcttttgta caatcacatt
1501 tttatactt cttgtttat tacaagctta tttatftaaa tgttatagca caggagaaaa
1561 acgcaaaaaa ttaagttggt ttatagggtt tgtgtgtaat cctatattaa ttacaagtat
1621 gtatgtgata tatgaaaatc tttaaagact atcaaaaatt cactccttat ggtttggatt
1681 ttaaacttta tagtaaagat tttatcacca agcttgattt taaagataaa gcttataatg
1741 tgctttataa tacaggagtt taaatgggag atagtattac gctttctatt tttgtaggtt
1801 cattgctatc cattgctggt atcacaaaat tttatcttat agctttatct gtgcttattg
1861 tcttttctat tttaaattat tggattaaga ttaatataaa agaatttgta aaatcttatt
1921 ttttaatatc ttttattatc ttttttacag ctattgttat cgtatfffft cttacttatg
1981 atcttgaaac ttctagggga cttgtattac ttggctctcc agaagttgaa aaattatcac
2041 cacaagaata taaagccat aattatftta aatftftaac ctttacaact atgtttffff
2101 tggcaatcac tttttttata ctcccttgtt tattacaagc ttatftatftt aaatgttata
2161 gcacaggaga aaaacgcaa aaattaagtt ggtttatagg gtttgcgtgt aatatctttt
2221 tattaattgt gagtttttat aagtttatat aaaatcttca aa
```

//

LOCUS OIDGCHHC\_13 2057 bp DNA linear 12-APR-2021

DEFINITION Campylobacter species strain strain.  
 ACCESSION  
 VERSION  
 KEYWORDS .  
 SOURCE Campylobacter species  
 ORGANISM Campylobacter species  
 Unclassified.  
 COMMENT Annotated using prokka 1.14.6 from  
<https://github.com/tseemann/prokka>.  
 FEATURES Location/Qualifiers  
   source 1..2057  
           /organism="Campylobacter species"  
           /mol\_type="genomic DNA"  
           /strain="strain"  
   gene 130..768  
           /locus\_tag="OIDGCHHC\_00095"  
   CDS 130..768  
           /locus\_tag="OIDGCHHC\_00095"  
           /inference="ab initio prediction:Prodigal:002006"  
           /codon\_start=1  
           /transl\_table=11  
           /product="hypothetical protein"  
           /protein\_id="Prokka:OIDGCHHC\_00095"  
           /translation="MSEINNNAEIKEQDTQDEIIWEGKKHIPSFLFWITYIVLLCLF  
                   LYLFPRLFNPSKEIDYKWFIVFFTFLLGIYAFARAIYKMANIKRIYITKEKLVIEYYI  
                   KNDLVFPLGTFIYYRQISYSPSPGHIVIHTFGDKAKEYLEPGLFSDGDDPTKGCFEK  
                   INAIKPHVMPYLLSLDDEEFKIFFHVNTTSEIDTTFLKEAMELRKEKKDE"  
   gene 761..913  
           /locus\_tag="OIDGCHHC\_00096"  
   CDS 761..913  
           /locus\_tag="OIDGCHHC\_00096"  
           /inference="ab initio prediction:Prodigal:002006"  
           /codon\_start=1  
           /transl\_table=11  
           /product="hypothetical protein"  
           /protein\_id="Prokka:OIDGCHHC\_00096"  
           /translation="MNENIYGSLELYSKETQSTPSDKRDLGVFGDLAPYALQKVLLLR  
                   LLRGKQ"  
   gene 910..1527  
           /locus\_tag="OIDGCHHC\_00097"  
   CDS 910..1527  
           /locus\_tag="OIDGCHHC\_00097"  
           /inference="ab initio prediction:Prodigal:002006"  
           /codon\_start=1  
           /transl\_table=11  
           /product="hypothetical protein"  
           /protein\_id="Prokka:OIDGCHHC\_00097"  
           /translation="MNSTLLWKSARKIIPFSLFFCSLYFILAFFLCWFCWFVLLKES  
                   LWYSLLAIFLTFYISELYETLNFKSIILTEQGLTLKMRWFDEIFYPYGSFTIKSIT  
                   IQFIKFDETISFLSNTTIKNFKLLNGFESFGSFENNHTFKELCTKYTQKALETMNLEE  
                   KVNLYKLYQANIEIFFNQEIDHNVFIIDFSPYIQEIKTYLKDKNE"

ORIGIN

1 gtagtgata ctcaaattgt taccaagaaa gattgtgta taattaaagc aggtggagta  
 61 gaagtgatta tagactctaa tggacttgtg gttaaagtg gagagcttaa ggcagagtaa

```

121 aggataaaaa tgagtgaat aaacaataac gcagaaatca aagagcaaga cactcaagat
181 gaaatcattt gggaaggaaa aaagcatata ctttcgtttt tgcttttttg gataacatat
241 attgtgcttt tatgtctttt tctttattta tttcctagat tatttaatcc tagcaaagaa
301 atagattata aatggtttat agtttttttt acatttcttt taggcatata tgcatttgca
361 cgagcgatct ataaaatggc aatatattaaa agaatttata tcacaaaaga aaaacttggtg
421 attgagtatt atatcaaaaa tgatttggtt tttcctttag gaactttttt tatatattat
481 cgtcaaattt catattcacc ttctccagga catatagtga tacatacctt tggagataag
541 gccaaagaat accttgaacc tggttttattc agtgatggcg atgatccaac aaaaggttgt
601 tttgaaaaaa ttaatgccat tataaaacct catgtaatgc cttattttatt aagcttaagc
661 gatgaagaat ttgaaaaaat ctttttccat gtaaactacta ctagtgaaat tgatactact
721 ttccttaaag aagcaatgga actcagaaaa gagaaaaaag atgaatgaaa atattttatgg
781 aagtttagag ctttattcta aagaaactca aagcactcct agtgataaaa gagatttagg
841 agtatttgga gatcttgctc cttatgcctt acagaaagtt ttactactaa ggcttttaag
901 gggtaagcaa tgaataattc tactttactt tggaaaagta agagaaaaat tattcctttt
961 agtttgtttt tttgctctct ttattttata ttagcttttt ttctgtgttg gttttgttgg
1021 tttgttttac ttaaagaatc tttgtggtat agttttattag ctatatttct tacatttttt
1081 tatatttctg aattgtatga aacattaaat tttaaatcta taattttaac agagcaagga
1141 ttaacattaa aatgcggtg gtttgatagc gaaattttct atccttatgg aagttttact
1201 ataaaatcta taaccataca atttattaaa tttgatgaaa ctataagttt tttatcaaat
1261 actactatta aaaattttaa attacttaat ggttttgaat cttttggtag ttttgaaaac
1321 aatcacacat ttaaagagtt atgcaccaa tatacacaaa aagctttaga aactatgaat
1381 ttagaagaaa aagtaaactt ttataagctt tatcaagcaa atatagaaat attttttaat
1441 caagaaatag atcacaatgt ttttattatt gatttctccc cttatataca agagattaaa
1501 acttatttaa aggataaaaa tgagtgaat aaacaataac acagaaatca aagagcaaga
1561 cacccaagat gaaatcattt gggaaggaaa aaagcatata ctttcgtttt tgcttttttg
1621 gataacatat attgtgcttt tatgttttgc gctttatttg tttcctagat tatttaatcc
1681 tagcaaagaa atagattata aatggtttat agtttttttt acatttcttt tagttatata
1741 tgcacttgca caaagatct atagaatggc aatatattaaa agaatttata tcacaaaaga
1801 aaaacttggt attgagtatt atatcaaaaa tgatttggtt tttcctttag gaactttttt
1861 tgtgtattat cgtcgcctgt cttttgtgct tactccagga catatagtga tatacacctt
1921 cggagataaa gtcaaagaat accttgaacc tggttttattc agtgatggcg atgatccaac
1981 aaaagattgt tttgaaagaa ttaatgccat tataaaacct catgtaatgc cttattttatt
2041 aagcttaagt gatgaag

```

//

```

LOCUS      OIDGCHHC_14          1994 bp    DNA       linear     12-APR-2021
DEFINITION Campylobacter species strain strain.
ACCESSION
VERSION
KEYWORDS   .
SOURCE     Campylobacter species
  ORGANISM Campylobacter species
            Unclassified.
COMMENT    Annotated using prokka 1.14.6 from
            https://github.com/tseemann/prokka.
FEATURES   Location/Qualifiers
  source   1..1994
            /organism="Campylobacter species"
            /mol_type="genomic DNA"
            /strain="strain"
  gene     96..239
            /locus_tag="OIDGCHHC_00098"
  CDS     96..239
            /locus_tag="OIDGCHHC_00098"
            /inference="ab initio prediction:Prodigal:002006"

```

```

/codon_start=1
/transl_table=11
/product="hypothetical protein"
/protein_id="Prokka:OIDGCHHC_00098"
/translation="MAQAQLLEDLSKQVKFIRSEKENIISLKVAYPEKIDNKIIFVGK
VYE"
gene      232..1485
          /locus_tag="OIDGCHHC_00099"
CDS       232..1485
          /locus_tag="OIDGCHHC_00099"
          /inference="ab initio prediction:Prodigal:002006"
          /inference="similar to AA sequence:RefSeq:CKG88360.1"
          /codon_start=1
          /transl_table=11
          /product="hypothetical protein"
          /protein_id="Prokka:OIDGCHHC_00099"
          /translation="MNKTLIFHENSIDLNASFAPGTYIELQLEKESDKTLNWSYVEC
NSEKKMRYLLDTDCHSIEAKDLKFIDSFKNICGFHLPISRDNPTKDIKDYKYYIIV
FAYDEKKAIPSLDFHIVIDMSFRVGVGKDESVEESKPRNDFNSDIIQTNCIFSVFEA
VEFLKACQSFKEKNEIDNYVFFKNYPQFAGKIAYIYRFDLANEEFIKSVSDGNKYLK
EREKFYKVASDVYIKNPIYKMGFEKQLQNQVVDINIADFLKDFAKRLGIDEKVLPIV
GYNPQRGDSGTDYTVNTLDLNPKASYVDFIDTIIHEFRHFYIYCIKNNKNSIEKLL
YLDMVQFYIPWNFYKIFNSYDKKCLIIDNEDETKKCLKNRITYYGSWKFLNPTLDLLPS
PLYYLQPSLEDSRIMAYYFRKEIKL"

```

ORIGIN

```

1  aaaaagataa aaaagagcaa agcataataa aagataatct atatctttat agcatcaatg
61  aaaagggaga gtttggcagt agtggttagca taggtatggc acaagcacag ttattagagg
121 atttaagtaa acagggttaa tttatacгаа gcgaaaagga aatataatc tcaactcaaг
181 tggcttacc tgaaaaaata gataataaaa ttatatgtt aggaaaagtt tatgaataaa
241 aactaatat ttcatgaaaa ttcccatatt gatttaaacg cttcttttgc accagggact
301 tatatagaat tgcaattaga aaaagaaagc gataaaacgc taaattggag ttatgtagag
361 tgcaatagtg agaaaaaat gcgatatttg ttggatactg attgtcattc tattgaggct
421 aaagatctta aatttataga tagttttaaa ggtaatattt gtggatttca tttacctata
481 agtagagata atgaaccaac aaaagatata aaagattata aatattatat tatagttttt
541 gcttatgatg aaaaaaaggc tatacctagt ttagaagatt ttcatatagt tatagatatg
601 agctttagag taggagttgg aaaagatgag agtgtagaag aaagtaagcc aaggaatgat
661 ttaaatagtg atataattca aacaaattgt attttttagtg tttttgaggc tgtagagttt
721 ttaaaagctt gccaaagttt taaagaaaaa aatgaaatag ataattatgt ttttttcaaа
781 aactatctc aatttgcagg aaaaattgct tatatttatt atagatttga tttagctaat
841 gaagaattta ttaaaagtgt aagtgatgga aataagtatt taaaagaaag ggagaaattt
901 tataaagttg cttcagatgt ttatattaaa aaccctattt ataaaatggg ctttgagaaa
961 aaacttcaaа atcaagttgt tgatataaac attgcaaaag atttttttaaа ggacttttgcт
1021 aaaagactag ggatagacga aaaagttttg cctgtaattg gatataatcc tcaacgaggg
1081 gattctggaa catatgacta tacagtaaат acttttagatt tgaatccaaa агcttcttat
1141 gttgatttta ttgataccat tattcatгаа tttaggcatt tttatattta ttgcataaaa
1201 aataattcta aaaatagtat agaaaaattg ctttatcttg atatggtaca attttatata
1261 ccgtggaatt tttataaaat tttcaatagt tatgataaaa aatgtttgat ttatgataat
1321 gaagatgaaa cgaagaagtг tttaaaaaat cgcacatatt atggaagttg gaaattttta
1381 aatcccacat tagatctctt gccaaгtcct ttatactatc ttcagccaag tgagttagac
1441 tctaggatta tggcatatta ttttagaaag gaaattaaat tataatgact ccaccatctt
1501 taccagatgt agaaaaacat gaagatttct tacaаaccag aaaagaacct tatgctattt
1561 atttagccat aaacacaaac ataaaaagtt ataataatat ttgtcctagc gagaaatatt
1621 tttggaaatt taataatag аatgaacttg ataaatggta taacccaaaа tttggcatat
1681 accttggcaa aattgttttt gataaaaaag аcaacaaact catcccaaaa tatatagccg

```

```
1741 ctaaatttga aaatttagaa gaagaagtta aaaagataaa aaatccttta tggcttgcta
1801 ataaaaatcc taattatatt gaacctaaat tttatgatgg tatgagtgga ggttattatt
1861 ttgaaagtcc aaataattta gagtatcaat gcaaaataga aaaagacact caagttttaa
1921 gccagaaca aatcatttct tatgtgaaag aactttatag taaaaacaca ataataataa
1981 aaaattatat tgat
```

//

LOCUS           OIDGCHHC\_15                           1445 bp     DNA           linear           12-APR-2021

DEFINITION     Campylobacter species strain strain.

ACCESSION

VERSION

KEYWORDS       .

SOURCE         Campylobacter species

  ORGANISM     Campylobacter species

  Unclassified.

COMMENT        Annotated using prokka 1.14.6 from  
                  <https://github.com/tseemann/prokka>.

FEATURES        Location/Qualifiers

  source

  1..1445

    /organism="Campylobacter species"

    /mol\_type="genomic DNA"

    /strain="strain"

  gene

  76..855

    /locus\_tag="OIDGCHHC\_00100"

  CDS

  76..855

    /locus\_tag="OIDGCHHC\_00100"

    /inference="ab initio prediction:Prodigal:002006"

    /inference="similar to AA sequence:RefSeq:CKG88360.1"

    /codon\_start=1

    /transl\_table=11

    /product="hypothetical protein"

    /protein\_id="Prokka:OIDGCHHC\_00100"

    /translation="MSFRVGVGKDESVEESKLSGLKSDTFIEEWKLNLIADFYEA  
YNFILIMIFIYKNDWDFIVNPMNYPQLAGKIAIYIYRFDFRKIYHQIKLKYDMQMKY  
KNYFQDLKYEETIKMVVKYNYKSSQTYPVQWVERLIKEICNEFKINTKIEFIPMKV  
KQYGLYNSSYTI SINVNNIKVTQEILKTIVHEIRHAYMQQKCLKNDALQRYMYFTYK  
KVYFNAEQIYLDENETKDVYFQPSETEARAIENNIKEIQ"

ORIGIN

```
  1  tattatatta tagtttttgc ttatgatgaa aaaaaggcta tacctagttt agaagatttt
  61  catatagtta tagatatgag ctttagagta ggagttggaa aagatgagag tgtagaagaa
 121  agtaagctat ctagtggttt aaaatctgat accgatttta tagaggaatg gaaaaagtta
 181  aatttaatag ctgattttta tgaagcttac aactttatac tcataatgat ctttatatat
 241  aaaaacgatt gggataatth tatagtaaht ccaatgaatt atccccaact tgcaggaaaa
 301  attgcttata tttattatag atttgatttt agaaaaatat atcatcaaat taaattaaaa
 361  tatgatatgc aatgaagta taaaattat tttcaagact taaaatacta cgaagaaaca
 421  attaagatgg tggttaaaaa atataattac aatcaagtc aaacttatcc tgtgcaatgg
 481  tgggaaagat taattaaaga aatttgcaat gaatttaaaa taaatacaaa aattgaatth
 541  attccaatga agttaaaca atacggttta tataataatt caagttacac aataagtata
 601  aatgtaataa atataaaagt tacacaagaa atattaaaga caatcgttca tgaataacgc
 661  cacgcttata tgcaacaaaa aaaacttaaa aacgatgctt tgcaagata tatgtatttt
 721  acttacaata aagtttattt taatgcagaa caaatatatt tggatgaaaa tgagactaaa
 781  gatgtgtatt attttcagcc aagtgaacaa gaggctagag caatagaaaa caatataatt
 841  aaggaaatac aatgagattt atcgagccag acttagaaaa acataagtat tttttacaaa
 901  ccagaaaaga gccttttgct atttatttag ccatcaatac taatattaaa agctttaata
 961  atatttgtcc tagcgaggaa aattcgtggt attttcgcag caaagaaatt ctagaaaatt
```

```

1021 ctcttaataa tttttataac ccaaaatttg gcatatatct aggtaaaatt atatttgata
1081 aaaaaggcaa taaacttatt ccaaaataca taccactaa atttgaaaat ttagaagaag
1141 aacttaaaaa gataaaaaat cctttatggc ttgctaataa aaaccctaata tatattaagc
1201 ctaaaccatt gaaacctatg aaacctaata caaaagaaag ttctttggaa aatataagtc
1261 aattggagtt agcaatacaa gatgtagtgg taagtcgtgg tgattataaa ataaccactc
1321 caaataatth agagtatcaa tgcaaaatag aaaaagacac tcaagtttta agccaagaac
1381 aatcatttc ttatgtgaaa gaactttata gtaaaaacac aataataata aaaaattata
1441 ttgat

```

```

//
LOCUS      OIDGCHHC_16          1355 bp    DNA        linear      12-APR-2021
DEFINITION Campylobacter species strain strain.
ACCESSION
VERSION
KEYWORDS   .
SOURCE     Campylobacter species
  ORGANISM Campylobacter species
            Unclassified.
COMMENT    Annotated using prokka 1.14.6 from
            https://github.com/tseemann/prokka.
FEATURES   Location/Qualifiers
  source   1..1355
            /organism="Campylobacter species"
            /mol_type="genomic DNA"
            /strain="strain"

```

```

ORIGIN
  1  tctcactcta aaaacctaaa ccatttcatc ttagaaaaca aagataaaaa taaaagaatt
 61  atctttttaa ataatgcttc atcgatgtca aatttaatcc atatttatga taatcattgt
121  gatgtattta ttaaaaatga ttctttgctt gatattaaaa gaatagaaaa agaataatgat
181  attaaattta aagaatttaa tacaagagtg tttttttatg aaaaacttct tttaggtgca
241  aaagaaaata atgaattttt atttgaagaa aaagaagaaa atttacttta tcatttttaa
301  tacgataaag aggatttaag ttcttttaaa gatttaagta taaaatataa tatttataat
361  gcaaggatta agaattattc tttactagaa gaaagttaa atattaaatt agaaccctaaa
421  gagcttaaaa aagaaattgc ctacaacaat gcaagtttta ataaactttc aaaagaacct
481  ttaaacaat  cctcatctaa cgctaaagaa ccctgcttta tcactttata tctaaaagat
541  gaacacaata aaccattgct taatgctaaa atcatcataa aaggttttca acataatgaa
601  gccttaagag tagttaattt aaaaagacgc agcgatgaaa aaggcaagat aagatttgat
661  aaagaaaagt attttagtga ttgttatagc tttaaagtaa agcttgatga aagcaaagct
721  tattttccta ctcttttaca aaatgctaaa agaattttta ataattatac ccatcacaaa
781  gttggactta tacttaaatt taaagctaaa gatcatttag tttatgatgg atttaatgct
841  tatcattaca aaggaaatga attaattaat tcttatatgg caagaagtgg cactgctaag
901  gcagacaatc aaaaaagaag taaaaaacia attgcacatt atttttacca agatgaaaaa
961  gataaaagca aaagcggaaa ggcttatttt tactatgatg atgaaagcat tcaagataga
1021 tttggcactt tacctgaagg ggagtattat ttaaaaatca atgaaatagc taaagatact
1081 aagcctaact ttttaaaaga ttatcccttt gaaataggaa aaacctgggg aagatactgc
1141 gtaagattat atactgataa agaatgctct aaaactttta aagaaataga aataaaagaa
1201 agtaatgaaa aagaaaacia aacaagcaaa aaagataaaa aagagcaaag cataataaaa
1261 gataatctat atctttatag catcaatgaa aaggagaggt ttggcagtag tggtagcata
1321 ggtatggcac aagcacagtt attagaggat ttaag

```

```

//
LOCUS      OIDGCHHC_17          1314 bp    DNA        linear      12-APR-2021
DEFINITION Campylobacter species strain strain.
ACCESSION
VERSION
KEYWORDS   .

```

SOURCE Campylobacter species  
 ORGANISM Campylobacter species  
 Unclassified.  
 COMMENT Annotated using prokka 1.14.6 from  
<https://github.com/tseemann/prokka>.  
 FEATURES Location/Qualifiers  
 source 1..1314  
 /organism="Campylobacter species"  
 /mol\_type="genomic DNA"  
 /strain="strain"

ORIGIN  
 1 aaaaagataa aaaagagcaa agcataataa aagataatct atatctttat agcatcaatg  
 61 aaaagggaga gtttggcagt agtggttagca taggtatggc acaagcacag ttattagagg  
 121 atttaagcaa gcaagctaag tttatacaag atgagaagga aggaattggt tctttaagag  
 181 tagagtatcc taagcaagag aaatctaaag taaatttcat aaaagaaata gaatgggaac  
 241 tcgatgaaga tgaagatgtg gtaagtgtg aaaaaagtgt aaggattatt atcgatgaaa  
 301 aggcaaattt tgcaccaggg acttatgtag aatgcgaagt tgatggttta gaagatgatg  
 361 taaatatcgt ttgggcttta gctcaaattc aaaatgaagc aagacttcaa agaattttag  
 421 aaagtaaaga gcatttagaa tttaaagata taaagttttt aaaagacgaa agtaaattatt  
 481 ttcattgaatg ctgggaaatg gatgatgaag aaaaagatga agaatttgaa aaaataggct  
 541 ttagtttacc tctaaaaagg gctaataag aagaatttga taaatattat gctttagttt  
 601 ttgcttatga agataaaaaat aaatttaaaa gacttcctaa tttaaatgat gcttataaaa  
 661 tcatagatat gagctttaa gttggctctg gtagagatga tagggtgaaa gaattattta  
 721 caagagagga gctaaaatcc cttaatgtat ataacttaa cgcacaaaaa tcaatcgata  
 781 gtgttgaaga ggcaaattgg tttttaaggg caaatttaa aaatcaagaa aaaagagact  
 841 tttttacctt tcttagaacc taccctcaac ttgccggaaa aattgcttat atatactata  
 901 gatttgattt aatcaataag gaatttttaa caagtgtatc agaaaaagat aaaggaaatt  
 961 atcttcaaga tagagacggc aaatatatta gcaccataat taataaaatt ttacctttgg  
 1021 aatataagaa tggtaaaagt tttaaacaat tccacacaga gcttttaaatt aacaaaaaca  
 1081 gagatcttaa agaattgtaa gattttttta aagctttaa tcaaactctt tgtaaagaat  
 1141 ttaatttacc tttagaaaat gtagtctttt atagccaaaa gcctagcggga tctttatcat  
 1201 ttggagctta tgaagaaaat aaggtaagat taaatcaata cattttaaaa gcttatttta  
 1261 aagaatttgc aaaaacggtt tttcacgaat gtaggcattt ttatatagaa aaat

//  
 LOCUS OIDGCHHC\_18 1132 bp DNA linear 12-APR-2021  
 DEFINITION Campylobacter species strain strain.  
 ACCESSION  
 VERSION  
 KEYWORDS .  
 SOURCE Campylobacter species  
 ORGANISM Campylobacter species  
 Unclassified.  
 COMMENT Annotated using prokka 1.14.6 from  
<https://github.com/tseemann/prokka>.  
 FEATURES Location/Qualifiers  
 source 1..1132  
 /organism="Campylobacter species"  
 /mol\_type="genomic DNA"  
 /strain="strain"  
 gene 40..393  
 /gene="trxB\_6"  
 /locus\_tag="OIDGCHHC\_00101"  
 CDS 40..393  
 /gene="trxB\_6"



```

/locus_tag="OIDGCHHC_00101"
/inference="ab initio prediction:Prodigal:002006"
/inference="similar to AA sequence:RefSeq:CKG86610.1"
/codon_start=1
/transl_table=11
/product="thioredoxin reductase"
/protein_id="Prokka:OIDGCHHC_00101"
/translation="MDSTPESRNEFDDAMDREYENGMVTRFDVDTPNDWGEQQAALDRD
TLVLSAKLAALTPPQGYPNAPYYFTPERLEWIYKRGYLDKLLDPRIPIYRYNFPREL
RAKILKFGEENGIKD"

```

ORIGIN

```

1 aatgatattg aaaaaggtaa attaaaagat ccaagagatg tggattctac tcctgaaagt
61 agaaatgaat ttgatgatgc tatggataga tacgaaaatg gaatggtaac tagatttgat
121 gtagatactc caaatgattg gggatgaaca caagctgctt tagatagaga tacttttagta
181 ttaagtgcc aactcgcagc cctcactcct ccacaaggct atcctaagtc tccttattat
241 tttacacctg aaagattaga atggatttat aaaagaggat atttagataa actccttgat
301 ccaagaatcc ctgctattta tagatataat ttcccaaggg aacttagagc taagatactc
361 aaatttggcg aagaaaatgg cattaagat taaagtaatt gcataggcag actagccact
421 actataatca tagaagatgg tttatatata ggttaaatta agaaaggata aaaatgagtg
481 aaacttatga gatttataca ccaatgggt taataatgga tgtatataaa gatactaata
541 aatcattttt ttcaggaaat gctaaacca caggcaatta taccgaagaa tattccaag
601 ctttgtttga agcacacgac attaaacgaa actcccccta caagactat aaaccaatat
661 atctagatcc taacttttat acagggcaag cttctacttt acttgaattt aaagaatggc
721 aaagcatata tttaaaagat cctatcaaag gagctcaaaa taccacaaat atttgtatta
781 attatgtaaa aaaaggtttt aaagaagttt taatcgaaca acttggcatt atatatttat
841 taacacatcc acaaatcgaa gttgaagtta agaaatatgg aaaaaaatat ttttaaggcta
901 taacaagga aattgctgca aaaagatttt ctacaattaa agaagaatta tttttcaata
961 aaacaaaaat atcctttatg gcagaacaag taaaaaacgg tattgattat gaaatagatc
1021 aaaagcttga agaaaataaa gaatttcttt taaaagact tttgtcttat ttgattattg
1081 atgagaaaag aagtgcaact gcttttagagg atataaaaga acaaaaaatat at

```

```

//
LOCUS      OIDGCHHC_19          1037 bp    DNA        linear      12-APR-2021
DEFINITION Campylobacter species strain strain.
ACCESSION
VERSION
KEYWORDS   .
SOURCE     Campylobacter species
  ORGANISM Campylobacter species
            Unclassified.
COMMENT    Annotated using prokka 1.14.6 from
            https://github.com/tseemann/prokka.
FEATURES   Location/Qualifiers
  source   1..1037
            /organism="Campylobacter species"
            /mol_type="genomic DNA"
            /strain="strain"
  gene     1..954
            /locus_tag="OIDGCHHC_00102"
  CDS     1..954
            /locus_tag="OIDGCHHC_00102"
            /inference="ab initio prediction:Prodigal:002006"
            /inference="similar to AA sequence:RefSeq:AVS37497.1"
            /codon_start=1
            /transl_table=11

```

```
/product="type VI secretion protein VgrG"  
/protein_id="Prokka:OIDGCHHC_00102"  
/translation="MPQYNYPRYKREIATNLSYLSVAPAMIDKGLDTLKLQENTDYE  
LSSINNHYLTLANSTIGVDNADARARNEITLKNDDKKEEIYILAQKDYKEEIGNNYYEQ  
TIKNNKTSEVGALYTEFITLGHMQNIIGFKNVNVGAEYLENTLLSKDTNVLNNTLNV  
GISNEVNIGQNHEEKIGNDKRVIINNLEQDIKNDFIQRIGHNKNETIKGSYVLQTNQ  
SIKFYSKQDLSIETNDCFKAEDTFVSFKAKKNCSFTADEVYTMANKESFLTAQKQIV  
SRVGNITTITQTKDKIILQVGTQVIIDSKGLRVQGGDLRAD"
```

ORIGIN

```
1 atgccccaat ataattatcc aagatacaaa agagaaatcg ctacaaatgc attgagctat  
61 ttaagcgtag ctctgtctat gattgataaa ggtttagata cattaanaact tcaagaaaat  
121 actgattatg aattaagctc tataaacaat cattatctta ctttagcaaa ttctacaata  
181 ggagtagata atgccgatgc aagagcaagg aatgaaatta ccctaaaaaa cgacaaagac  
241 aaagaagaaa tttatatcct agcacaaaaa gattataaag aagaaatagg taataattac  
301 gagcaaacca taaaaaataa taaaacttca gaagtgggag ctttatatac cgaatttatc  
361 actttaggac atatgcaaaa tattataggt tttaaaaatg tcaatgtagg agctgaatat  
421 ttagaaaata ctttgctttc taaagatact aatgtggggt taaataatac tttgaatgtg  
481 ggaatcagca atgaagtcaa tatcggacaa aaccacgaag aaaagatagg aaacgataaa  
541 agagtaataa tcaataacaa tctagaacaa gatatcaaaa atgattttat ccaaagaata  
601 ggacataata aaaatgaac cataaaaggt tcttatgtgc ttcaaaccaa tcaaagtata  
661 aaatthttatt ccaacaaga tctaagcata gaaacaaacg attgctttaa agctgaagct  
721 gatacttttg ttagtttcaa agccaagaag aattgctctt ttacagccga tgaagtgtat  
781 actatggcaa ataaagaaag ttttttaaca gcacaaaaac aaattgtttc tagggtagga  
841 aatacaacta tcacacaaac aaaagataag attatactcc aagtaggaac aacacaagtg  
901 attatagata gtaaaggttt aagagtgcaa ggaggtgatt taagagcaga ttaaaagcaa  
961 ttttcttaa attaaaacca aatcataaa taaacctaatt ttacaataaa aggaaaaaca  
1021 atgaaaacat tagaaga
```

//

LOCUS           OIDGCHHC\_20                   1028 bp   DNA           linear           12-APR-2021

DEFINITION   Campylobacter species strain strain.

ACCESSION

VERSION

KEYWORDS     .

SOURCE       Campylobacter species

  ORGANISM   Campylobacter species

  Unclassified.

COMMENT      Annotated using prokka 1.14.6 from  
              <https://github.com/tseemann/prokka>.

FEATURES     Location/Qualifiers

  source

    1..1028

      /organism="Campylobacter species"

      /mol\_type="genomic DNA"

      /strain="strain"

  gene

    complement(554..910)

      /locus\_tag="OIDGCHHC\_00103"

  CDS

    complement(554..910)

      /locus\_tag="OIDGCHHC\_00103"

      /inference="ab initio prediction:Prodigal:002006"

      /inference="similar to AA sequence:RefSeq:APB39663.1"

      /codon\_start=1

      /transl\_table=11

      /product="VgrG protein"

      /protein\_id="Prokka:OIDGCHHC\_00103"

      /translation="MKGNKKEVVEGKLELHVNKGINYFTEEHFSMQTNNYIDIYTEQN"

LSTQTKKQHTELAESKYSDFQTDSEVKAGNQILHQVGDQTQIVTKKDCVIIKAGGVEVI  
IDSNGLVVKGGELKAE"

ORIGIN

```
1 cttcatcact taagcttaat aaataaggca ttacatgagg ttttataatg gcattaattc
61 tttcaaaaca atcttttggt ggatcatcgc catcactgaa taaaccaggt tcaaggtatt
121 ctttgacctt atctccaaag gtgtatatca ccatatctcc tggatttgat atggatggaa
181 gtgacgaact acgataatat acaaaaaaag ttcctaaagg aaaaaccaa tcaattttta
241 tataatactc aatcacaagt ttttcttttg tgatataaaa tcttttaata tttgccattt
301 gatagatatt ttttacaagt atatataacc caaaaagaaa tataacaaaa actataaacc
361 atttataatc tatttctttg ttaggattaa ataacttagg aaacaaataa agaataaaac
421 ataaaaatac aatatttgct atccaataaa gcaaaaacga aggtatatgc ttttttcctt
481 cccaaatgat ttcatcttgg gtgtcttgct ctttgatttc tgtgttattg tttatttcac
541 tcatttttat ctttactctt gccttaagct ctccaccttt aaccacaagt ccattagagt
601 ctataatcac ttctactcca cctgctttaa tgataacaca atctttctta gtaacaattt
661 gagtatcacc tacttgatgg aggatttgat tgcctgcttt tacttcagaa tctgtttgaa
721 agtcactata tttagattct gcaagttctg tatgttggtt tttggtttgc gtgcttaaat
781 tttgttctgt gtatataatca atgtaattgt tagtttgcac actaaaatgt tcttccgtaa
841 agtaatttat tcctttatta acatgaagct caagttttcc ctcaaccacc tcctttttat
901 ttcccttcac attccttatc tcacttttat ggataatagt attttgattt gcacctattt
961 ctatgtcttt gttttctcct acaaactcat gagagttttt agctatttct actttattat
1021 ctactcct
```

//

LOCUS OIDGCHHC\_21 1005 bp DNA linear 12-APR-2021

DEFINITION Campylobacter species strain strain.

ACCESSION

VERSION

KEYWORDS .

SOURCE Campylobacter species

ORGANISM Campylobacter species

Unclassified.

COMMENT Annotated using prokka 1.14.6 from  
<https://github.com/tseemann/prokka>.

FEATURES Location/Qualifiers

source 1..1005

/organism="Campylobacter species"

/mol\_type="genomic DNA"

/strain="strain"

ORIGIN

```
1 cttatcctt tcttatggct tcatttaata aatcacagta ttcattacga tcttcataat
61 cttataaaa gatattaaat ttcttttcaa gttgatcgga agtcattgca cctgcagctt
121 ttaaaagctt tctatttcta gctccttcgg cttcatctaa aggtgtcgct aaatagggaa
181 caaaattaac attagctcca agctctatta gaagttgcac ggttctgtaa tttcctggct
241 ctctcactgc tctaaataag ggtgtattct gatatttata gattgattca aactcatatt
301 cttccatata cacattagcc cctcctttga tggcaagctc tagaaattta taatcattat
361 tactagccca aaaatgcata ggagaccagc ccattttgtc gcgatatact tcaaatttag
421 ctccatgatt tgctaggat tggataattt gggggtttgg attatcagca gttaggatat
481 acttatagat taaagcttct ttgtaaagtc taggattatc ttccatgtat cttactacaa
541 catatttatc attagcttct ttgatataat tcatatctgt aaagcgaaaa ttatatttag
601 gatcttttag acttaagcca tactcatcaa ataaataatc taaaatagaa aaatcattat
661 tattttcttc acaagcaaat gcagctctca ttatcaaata ataaggatca aataaaggat
721 attcttcggt atcattttta aatgaagct cataacaaga aatttttaca ggataatcctt
781 ttaaaatctc ttttacttta gctaaatcat tatcatctat agcctcaaga actaaatcctt
841 ctaacttatc cttttcctca taactcatag ccttaatatc ttctaagtgt ttcattgttt
901 ttctttttat tgtaaattag gtttatttat gattttgggt ttaattttta gaaaattgct
```

```

    961 tttaatctgc tcttaaatca cctccttgca ctcttaaacc tttac
//
LOCUS      OIDGCHHC_22                961 bp    DNA        linear      12-APR-2021
DEFINITION Campylobacter species strain strain.
ACCESSION
VERSION
KEYWORDS   .
SOURCE     Campylobacter species
  ORGANISM Campylobacter species
            Unclassified.
COMMENT    Annotated using prokka 1.14.6 from
            https://github.com/tseemann/prokka.
FEATURES   Location/Qualifiers
  source   1..961
            /organism="Campylobacter species"
            /mol_type="genomic DNA"
            /strain="strain"
  gene     120..620
            /locus_tag="OIDGCHHC_00104"
  CDS      120..620
            /locus_tag="OIDGCHHC_00104"
            /inference="ab initio prediction:Prodigal:002006"
            /inference="similar to AA sequence:RefSeq:CKG86719.1"
            /codon_start=1
            /transl_table=11
            /product="hypothetical protein"
            /protein_id="Prokka:OIDGCHHC_00104"
            /translation="MGDSITLYIFLGLLGFISVFTFARTYFITLAVFIIIFSIINYWMR
            INIKEFVKSYFLIFFVILFADIIGVYFYGNIENPAKFTSLFLEVKQLPSEEYLVFSC
            LAFLFIITMEFFIITFFILPCLLQAYFFKCYSTGEKRRKLSWFIGFACNIFLLIVSFY
            KLYENL"
  gene     607..738
            /locus_tag="OIDGCHHC_00105"
  CDS      607..738
            /locus_tag="OIDGCHHC_00105"
            /inference="ab initio prediction:Prodigal:002006"
            /inference="similar to AA sequence:RefSeq:CKG86746.1"
            /codon_start=1
            /transl_table=11
            /product="hypothetical protein"
            /protein_id="Prokka:OIDGCHHC_00105"
            /translation="MKIFKDYQKFTPYGLDFKLYSKDFITKLDFRDKAYNVLYDIGV"
ORIGIN
  1 aagactatca aaaattcact ccttatgggt tggattttaa actttatagt aaagatttta
  61 tcactaaact tgatttttaa gataaagctt ataatgtgct ttataataca ggagttttaa
  121 tgggagatag cattacactt tatatTTTT tgggcttggt gggatttatt agtgtcttta
  181 ctttgcaag aactatTTTT ataactttag ctgtgtttat tatcttttct attataaatt
  241 attggatgag aattaacata aaagaatttg taaaatctta ttttttgata ttttttgta
  301 ttttatttgc agatataatt ggagtatttt atttcggcta taatattgaa aatcctgcga
  361 aattcacttc tcttttttta gaggttaagc aattaccatc tgaagaatac ctagtattta
  421 gctgtcttgc attccttattt atcataacta tggaaTTTT tataatcaca ttctttatac
  481 ttccttgttt attacaagct tattttttta aatgctatag cacaggagaa aaacgcaaaa
  541 aattaagttg gtttataggg tttgcgtgta atatcttttt attaattgtg agtttttata
  601 agttatatga aatcttttaa agactatcaa aaattcactc cttatgggtt ggatttttaa

```

661 ctttatagta aagatTTTTat cactaagcTT gatttttagag ataaagcTTa taatgtgctt  
721 tatgatataG gagttttaaTt gggagatagc attacacttt ctattttttg gggtttgatt  
781 ttgtttattg ctagtttttac tgttgcaaga atttatctta tagctctaag cgttcttatt  
841 gtcttttcta ttttaaatta ttggatcaag attaataataa aagaatttGt aaaatcttat  
901 tttttaatat cttttattat cttttttaca gctattgtta tcgtatttta tcttacttat  
961 g

//

LOCUS OIGDCHHC\_23 932 bp DNA linear 12-APR-2021

DEFINITION Campylobacter species strain strain.

ACCESSION

VERSION

KEYWORDS .

SOURCE Campylobacter species

ORGANISM Campylobacter species

Unclassified.

COMMENT Annotated using prokka 1.14.6 from  
<https://github.com/tseemann/prokka>.

FEATURES Location/Qualifiers

source

1..932

/organism="Campylobacter species"

/mol\_type="genomic DNA"

/strain="strain"

gene

126..539

/locus\_tag="OIGDCHHC\_00106"

CDS

126..539

/locus\_tag="OIGDCHHC\_00106"

/inference="ab initio prediction:Prodigal:002006"

/codon\_start=1

/transl\_table=11

/product="hypothetical protein"

/protein\_id="Prokka:OIGDCHHC\_00106"

/translation="MFKKLALFLLPVYLLFLAGGCSYKYMDPQYYEFKSLCYFNLGK

VLIEDESIGNKNTNIIIVTPKSKQIKDRIVETRFERKNENQVVYRINTYFYDNYGIFLK

GDEGAGLYFRYMEVLSCKNIDKKFKKDDWQVETLE"

gene

543..683

/locus\_tag="OIGDCHHC\_00107"

CDS

543..683

/locus\_tag="OIGDCHHC\_00107"

/inference="ab initio prediction:Prodigal:002006"

/codon\_start=1

/transl\_table=11

/product="hypothetical protein"

/protein\_id="Prokka:OIGDCHHC\_00107"

/translation="MNKNIKTQEAKLDLITKFLDYANCADASYAMLHLIDENDEKGF

KG"

ORIGIN

1 ttaatctttt aatatttatt cttatatttt tcttttttGt ttttatattt tctattattt  
61 tatattttat ctttaaagtc ttttttaaaa taaaaaataa aacaaaaact ataaatttta  
121 aaacaatgtt taaaaaactt gctttatttc ttttacctgt atatctttta ttattccttag  
181 caggaggctg ttcttataaa tatatggatc cgcagtatta tgagtttaag agcttGtGtt  
241 attttaattt gggaaaagtg ttgattgagg atgaatctat aaagaataaa acgaatataa  
301 tagtgacacc taaaagtaag caaataaaaag ataggatagt ggaaactaga tttgaaagaa  
361 aaaatgaaaa ccaagtagtg tattatcgta ttaatacata tttttatgat aattatggta  
421 tattcctgaa aggcgatgag ggtgctggat tatatttttag atatatggaa gtattaagtt

```
481 gtaagaatat tgacaaaaaa tttaagaaag atgactggca agttgaaact ttggaataac
541 aaatgaacaa aaacattaaa acgcaagaag ctaaattaga cttaatcact aaatTTTTAG
601 actatgctaa ttgtgcagat gctagttatg cgatgttgca tttaatcgat gagaatgatg
661 aaaaagggtt tttaaaagga taataatgct agaattcttt gttaatcttt taatatttat
721 tcttatattt ttctTTTTTG tttttatatt ttctattatt ttatatttta tctttaaagt
781 cttttttaa ataaaaaata aaacaaaaac tataaatttt aaaacaatgt ttaaaaaact
841 tgctttattt cttttacctg tataatctttt attattctta gcaggaggat gttcttataa
901 atatatggat ccgcagtatt atgagtttaa ga
```

//

LOCUS OIGDCHHC\_24 747 bp DNA linear 12-APR-2021

DEFINITION Campylobacter species strain strain.

ACCESSION

VERSION

KEYWORDS .

SOURCE Campylobacter species

ORGANISM Campylobacter species  
Unclassified.

COMMENT Annotated using prokka 1.14.6 from  
<https://github.com/tseemann/prokka>.

FEATURES Location/Qualifiers  
source 1..747  
/organism="Campylobacter species"  
/mol\_type="genomic DNA"  
/strain="strain"

ORIGIN

```
1 acaggcaatt ataccgaaga atattccaaa gctttgtttg aagccgatcg catattaaga
61 aactccccct acaagacta taaaccaata tatctagatc ctaactttta tacaggggcaa
121 aatccactt tgcttgaatt taaagaatgg caaagcatat atttaaaaga tcctatcaaa
181 ggagctatag ctccttgac taaagcagaa aaagcttatt ataaatcttt aaaaaccaaa
241 agagaaagat ataaatatct aattataaga agtgggtataa gaagcactgt tatagatata
301 ccctatgatg cttattgtaa tgtagatgaa aaaggatatt taatcaatga agaatacgcc
361 tatatttatg atgaagttaa caataataaa gaaaccttaa aatcttctct ttttagacaa
421 gaatggggta tagcagcagg aatactagga aaacctgaat attttgtgcg ttttaaaat
481 catggcttta atgctagaat gatacaatgt tttattttat atattcaact cacaggtgga
541 ggatatgaag aattaggtat aaaaagagga atttataatt atgctgataa tcttttagaa
601 ataggtatag gtatggcagg gatacataaa aatcctttta gggctaaatt agtaaaagat
661 ttagctaaaa ctatacagcc tgatgaattt ggtatgctac cttttataga tgagattatg
721 ggagtagatt gggtgattga tttaaat
```

//

LOCUS OIGDCHHC\_25 738 bp DNA linear 12-APR-2021

DEFINITION Campylobacter species strain strain.

ACCESSION

VERSION

KEYWORDS .

SOURCE Campylobacter species

ORGANISM Campylobacter species  
Unclassified.

COMMENT Annotated using prokka 1.14.6 from  
<https://github.com/tseemann/prokka>.

FEATURES Location/Qualifiers  
source 1..738  
/organism="Campylobacter species"  
/mol\_type="genomic DNA"  
/strain="strain"

```

gene          49..222
              /locus_tag="OIDGCHHC_00108"
CDS           49..222
              /locus_tag="OIDGCHHC_00108"
              /inference="ab initio prediction:Prodigal:002006"
              /codon_start=1
              /transl_table=11
              /product="hypothetical protein"
              /protein_id="Prokka:OIDGCHHC_00108"
              /translation="MDNIALKTKNMQMSLHKIVDMHISPYWNTTRYVLEGNEGNMNF
              FIEDELACGNLYQ"
gene          394..609
              /locus_tag="OIDGCHHC_00109"
CDS           394..609
              /locus_tag="OIDGCHHC_00109"
              /inference="ab initio prediction:Prodigal:002006"
              /inference="similar to AA sequence:RefSeq:CKG86895.1"
              /codon_start=1
              /transl_table=11
              /product="methyltransferase small"
              /protein_id="Prokka:OIDGCHHC_00109"
              /translation="MDYFKALHDEYNGYLVIDDSLFFYAKLNGDFRELQARNFSQRYE
              IKFHQSNTTSGFSTALSYEKTEKIKRS"

```

ORIGIN

```

1  tacgatgata cttacaaaac tcctttaaat tttcaagaaa agatagagat ggataatatt
61 gcactaaaaa caaaaaatat gcaaatgtct ttacacaaga ttgttgatat gcatataagt
121 ccatattgga atactagaag gtatgtgtta gaaggcaatg agggtaatat gaattttgag
181 tttatagagg atgagctcgc ttgtggcaat ctttatcaat aataatataa ggaataaata
241 atgaccaata aagaacaaat caacaattta aaagattata cagaatttgt gtaagctagt
301 tattttaatt ttgtttatac tgaaggacaa aaagctttag gatttaaaat atctaaaact
361 agatttttta aagataagag tgaattagaa aaattggact attttaagc attacatgat
421 gaatataatg gatatttggg tatagatgat tctttatatt tttatgCGAA actaaatgga
481 gatttttagag aattacaagc tagaaatatt tctcaaagat atgagattaa atttcatcag
541 tccaacacta caagtggttt tagcactgct ttgtcttatg aaaagacaga gaaaattaag
601 aggagttaat aaatgctaga attcctttgtt aatccttttaa tatttattct tatatttttc
661 ttttttgttt ttatattttc tattatttta tattttatct ttaaagtctt ttttaaaata
721 aaaaataaaa caaaaact

```

//

```

LOCUS          OIDGCHHC_26                730 bp    DNA        linear        12-APR-2021
DEFINITION    Campylobacter species strain strain.
ACCESSION
VERSION
KEYWORDS      .
SOURCE        Campylobacter species
  ORGANISM    Campylobacter species
              Unclassified.
COMMENT       Annotated using prokka 1.14.6 from
              https://github.com/tseemann/prokka.
FEATURES      Location/Qualifiers
  source      1..730
              /organism="Campylobacter species"
              /mol_type="genomic DNA"
              /strain="strain"

```

ORIGIN

```

1  tatctacatc  aaatctagtt  accattccat  tttcgtatct  atccatagca  tcatcaaatt
61  catttctact  ttcaggagta  gaatccacat  ctcttggatc  ttttaattta  cttttttcaa
121  tatcattata  taaagcccaa  atgattctac  cttcttcac  ataggcaaaa  tcatatttat
181  ttaaataaat  cgtccaatct  gctcctataa  tctcatctaa  aaaaggtagc  ataccaaatt
241  catctaacia  actctcataa  tgatgatcgt  gtaaatcgta  aatcattttt  gctctaagct
301  tattccaatg  ttgccctgta  agaaaagaat  tagaacacaa  tactgctaaa  cctaaactct
361  taaaagcatt  tttatctcca  aattgagcct  gtaaaaataa  agcttgttgt  tgtcttgctt
421  taaatcctac  agcggctgta  ggactagctc  tcatatctcc  tagaagtaaa  gcagctaatt
481  cccattcatt  aaagaaagaa  taagatttta  atgttccacg  atgagaactt  acttcatcat
541  aaatataggc  gtattcttca  ttgattaaat  atcctttttc  atctacatta  caataagcat
601  catagggtat  atctataacc  acagatctta  atccacttct  tattgcaaaa  tacttacatc
661  tttctctttt  agtttttaaa  gatttataat  aagctttttc  tgcttttagtc  caaggagcta
721  tgcttccttt

```

//

LOCUS           OIDGCHHC\_27                           671 bp     DNA           linear           12-APR-2021

DEFINITION     Campylobacter species strain strain.

ACCESSION

VERSION

KEYWORDS       .

SOURCE         Campylobacter species

  ORGANISM     Campylobacter species

              Unclassified.

COMMENT        Annotated using prokka 1.14.6 from  
<https://github.com/tseemann/prokka>.

FEATURES

  source

              Location/Qualifiers

              1..671

              /organism="Campylobacter species"

              /mol\_type="genomic DNA"

              /strain="strain"

  gene

              complement(55..615)

              /locus\_tag="OIDGCHHC\_00110"

  CDS

              complement(55..615)

              /locus\_tag="OIDGCHHC\_00110"

              /inference="ab initio prediction:Prodigal:002006"

              /inference="similar to AA sequence:RefSeq:AAW35464.1"

              /note="conserved hypothetical protein"

              /codon\_start=1

              /transl\_table=11

              /product="hypothetical protein"

              /protein\_id="Prokka:OIDGCHHC\_00110"

              /translation="MSYLIIDEKRSATALEDIKEQKYIIDDYTFYFKELKSLELKKCT  
IYQLPCNHPLFKEFRNKEKQISAFKKDEDSPIHAYNEALQILQDFANGIYNTSKDKTG  
KCIEDKNKTRRLLEKLNIIIGQNNLKAMYMGINGNKESLKAIGKRENNTSKANINADIA  
SETKAPPNFIGRLATTIIIEDGLYMG"

ORIGIN

```

1  ccattgggtg  tataaatctc  ataagtttcg  ctactatatt  atcctttctt  aaatttatcc
61  catgtataaa  ccatcttcta  tgattatagt  agtggctagt  ctacctatga  agttaggcgg
121  agcttttggt  tccgatgcaa  tatcagcatt  tatatttgct  ttgctagtgt  tattttctct
181  ttttctatg  gctttcaagc  tttctttatt  tccatttatc  cccatataca  tagctttaag
241  attgttttgt  cctatgatat  tgagtttttc  tagtaatctt  ctggttttat  ttttatcttc
301  tatacathtt  cctgttttat  ctttgcttgt  attgtaaatt  ccattagcaa  aatccttgtaa
361  aatttgtaaa  gcttcattat  aagcatggat  gggactatct  tcatcctttt  taaaagcact
421  aatttgcttt  tctttatttc  taaactcttt  aaacaaagga  tgattacaag  ggagttgata
481  tatagtgcac  tttttaagct  ctaaagattt  taactctttg  aaataaaaag  tataatcatc

```



```
541 tataatatat tttgttctt ttatattctc taaagcagtt gcatttcttt tctcatcaat
601 aatcaaataa gacaaaagtc tttttaaaag aaattcttta ttttcttcaa gcttttgatc
661 tatttcataa t
```

//

LOCUS O1DGCHHC\_28 639 bp DNA linear 12-APR-2021

DEFINITION Campylobacter species strain strain.

ACCESSION

VERSION

KEYWORDS .

SOURCE Campylobacter species

ORGANISM Campylobacter species

Unclassified.

COMMENT Annotated using prokka 1.14.6 from  
<https://github.com/tseemann/prokka>.

FEATURES

source

Location/Qualifiers

1..639

/organism="Campylobacter species"

/mol\_type="genomic DNA"

/strain="strain"

gene

complement(20..562)

/gene="trxB\_7"

/locus\_tag="O1DGCHHC\_00111"

CDS

complement(20..562)

/gene="trxB\_7"

/locus\_tag="O1DGCHHC\_00111"

/inference="ab initio prediction:Prodigal:002006"

/inference="similar to AA sequence:RefSeq:CKG87041.1"

/codon\_start=1

/transl\_table=11

/product="thioredoxin reductase"

/protein\_id="Prokka:O1DGCHHC\_00111"

/translation="MLKDFSKNPPYDELGMLPFLDELIGVDWVIDPNRYRFAEDEKGR  
VNDALKDDVEKGILKDPRIIDSTSESRLFYKLDAYRNGMKTRFDGDNPNHWSKEQV  
ERFNDTLILCAKLAALTPPQGYTNAPYYYSERLEFIYKNHNLDKLLDPRIPAIYRYN  
FPRELRAKILKFGEENGIKD"

ORIGIN

```
1 gtctgcctat gaggttactt taatctttaa tgccattttc ttcgccaaat ttgagtatct
61 tagctctaag ttctcttggg aaattatata tataaatagc agggattctt ggatcaagga
121 gtttatctaa attatgattt ttgtaaataa actctaactt ttcaggagag taataataag
181 gtgcattagt atagccttga ggaggagtga gggctgagag tttggcacat aaaatcaaag
241 tatcattaaa tctttctact tgctctttac tccaatgatt tggattatct ccatcaaatc
301 tagttttcat tccatttcta taagcatcca atttatattc aaattccaat ctactctctg
361 aagtagaatc tataatctct ggatctttga gtattccttt ttcaacatca tcttttagag
421 catcattaac tcttcctttt tcgtcttctg caaatcgata cctatttgga tctatcacc
481 aatccactcc tataagttca tctaagaaag gaagcatacc caattcatca taaggaggat
541 ttttagaaaa gtcttttagc atttgagctt taagagggtt tttgtgtatg ccatctgtta
601 aatctctata tgcataagaa tcataaagac ttttaaac
```

//

LOCUS O1DGCHHC\_29 629 bp DNA linear 12-APR-2021

DEFINITION Campylobacter species strain strain.

ACCESSION

VERSION

KEYWORDS .

SOURCE Campylobacter species

ORGANISM Campylobacter species  
Unclassified.

COMMENT Annotated using prokka 1.14.6 from  
<https://github.com/tseemann/prokka>.

FEATURES Location/Qualifiers

source 1..629  
/organism="Campylobacter species"  
/mol\_type="genomic DNA"  
/strain="strain"

gene complement(50..616)  
/locus\_tag="OIDGCHHC\_00112"

CDS complement(50..616)  
/locus\_tag="OIDGCHHC\_00112"  
/inference="ab initio prediction:Prodigal:002006"  
/inference="similar to AA sequence:RefSeq:CKG88165.1"  
/codon\_start=1  
/transl\_table=11  
/product="ribosomal protein L7/L12"  
/protein\_id="Prokka:OIDGCHHC\_00112"  
/translation="MAKNVNVGGEYLTNVGLSKDTIVGLSNTLNVGVDNKVRVAKNSH  
EFVGENKDIEIGANQNTIIHKDEIRNVKGNKEMVEGHYDINISDKMQVLSEKEMDYK  
SKDNILFTSNESIGFESDKNTSMVADNITTYAKTIHELKADSEATIQVGETIINAKPD  
CVIIKAGGVEVIIDSNGLVVKGGEELKAE"

ORIGIN

```

1 tatataaaat cttttaagtt tgtaaaaagg ttttttcatt gcttatacctt tactctgcct
61 taagctctcc acctttaacc acaagtccat tagagtctat aatcacttct actccacctg
121 cttaaatgat aacacaatca ggTTTTGcat taataattgt ttctcctacc tgtatagtcg
181 cttcgctatc ggcttttaac tcatgaatag tttttgcgta agttgtgata ttatcagcta
241 ccatgcttgt atttttatca ctttcaaadc ctatggattc attacttgta aaaagaatat
301 tgtctttgct tttataatcc atctctttct cgcttaatac ttgcatttta tcgctgatat
361 taatatcata atgcccctca accatttctt ttttatttcc cttcacattc cttatctcat
421 ctttatggat aatagtattt tgattagcac ctatttctat atctttggtt tctcctacaa
481 actcatgaga gtttttagcc actcttactt tattatctac tcctacattt aaagtattgc
541 ttaatcctac tatggtatct ttagataagc ctacattagt taagtattct cctcctacat
601 tgacattttt agccaaatct atggtttga

```

//

LOCUS OIDGCHHC\_30 587 bp DNA linear 12-APR-2021

DEFINITION Campylobacter species strain strain.

ACCESSION

VERSION

KEYWORDS .

SOURCE Campylobacter species

ORGANISM Campylobacter species

Unclassified.

COMMENT Annotated using prokka 1.14.6 from  
<https://github.com/tseemann/prokka>.

FEATURES Location/Qualifiers

source 1..587  
/organism="Campylobacter species"  
/mol\_type="genomic DNA"  
/strain="strain"

ORIGIN

```

1 atgagttctt gtaagattac aaattcatta tttactttct tttgagataa ggagccttta
61 atatccacta ccttagtaca aggataactt acatttgcta tgggtattagg acaagctact

```

```
121 atactagagt ttaataaatc acttttctagc attataggga taccatcact tttaaaggat
181 tttcctttgt ttgatttaag tatgacttta cctccatgga tacattctag gttttgattt
241 tctaaaagag cgtgaagttt ggctatgctt tgttttttat ctacttgtgt ggttttttgt
301 tcttttagag tgtttgaaat taaatctttg tattctaagc tttgtttgct taagcattct
361 aatttgatat ttaaagattt ttctaataa gaataattaa gcaagcaaag ttcattcattt
421 ttataaaaga tactaagtct tcctaaacca ctgctttcat ctttaggaga aaaataataa
481 ctgggtatat cttgttttat agtattatct tgatctaatt ctccaaaata aaaaggatta
541 ttagaaaagt catttgagcc tgtaaggagg gtggagtta ggaagat
```

//

LOCUS           OIDGCHHC\_31                   584 bp   DNA       linear           12-APR-2021

DEFINITION    Campylobacter species strain strain.

ACCESSION

VERSION

KEYWORDS       .

SOURCE        Campylobacter species

  ORGANISM    Campylobacter species  
              Unclassified.

COMMENT       Annotated using prokka 1.14.6 from  
              <https://github.com/tseemann/prokka>.

FEATURES

                  Location/Qualifiers  
  source           1..584  
                  /organism="Campylobacter species"  
                  /mol\_type="genomic DNA"  
                  /strain="strain"  
  gene            218..316  
                  /locus\_tag="OIDGCHHC\_00113"  
  CDS             218..316  
                  /locus\_tag="OIDGCHHC\_00113"  
                  /inference="ab initio prediction:Prodigal:002006"  
                  /codon\_start=1  
                  /transl\_table=11  
                  /product="hypothetical protein"  
                  /protein\_id="Prokka:OIDGCHHC\_00113"  
                  /translation="MSKNIKTQEAKLDLITKFLDYANIADASYAML"

ORIGIN

```
1 aaaataaatt tactttaaca gaagttacat ttgaagatta ttatgatggt attcattatt
61 caacgcattt atcctatatt tatgataatt atggtatggt cttaaaaggt gatgagggtg
121 ctggattcta ttttagatat cataaaaagac tgtattgtga agatgttaga taaaaaatta
181 gaaagataat ttgagattta gattttttgga ataacaaatg agcaaaaaca ttaaaacaca
241 agaagctaaa ttagacttaa tcactaaatt ttagactat gctaatatag cagatgctag
301 ttatgctatg ttgtaatatg tttgggaaaa tatagagcaa gatgaaaaga ataataatta
361 tacttttggt gataaattaa agcaagatat tgttatgaaa aatagtaaag gagaagatat
421 tgtaaacct aaaaatacaa acacagctta tgcttgtgct atacaagctc gttttgaaca
481 aaataaaata gttaaaatag aacctaaata ttgtatttct cttataaata cttgttttga
541 tagtaaagaa ataacattgg ataatgatat tagtagggta ggat
```

//

LOCUS           OIDGCHHC\_32                   517 bp   DNA       linear           12-APR-2021

DEFINITION    Campylobacter species strain strain.

ACCESSION

VERSION

KEYWORDS       .

SOURCE        Campylobacter species

  ORGANISM    Campylobacter species  
              Unclassified.

COMMENT Annotated using prokka 1.14.6 from  
<https://github.com/tseemann/prokka>.

FEATURES Location/Qualifiers

source 1..517  
/organism="Campylobacter species"  
/mol\_type="genomic DNA"  
/strain="strain"

gene complement(365..496)  
/locus\_tag="OIDGCHHC\_00114"

CDS complement(365..496)  
/locus\_tag="OIDGCHHC\_00114"  
/inference="ab initio prediction:Prodigal:002006"  
/codon\_start=1  
/transl\_table=11  
/product="hypothetical protein"  
/protein\_id="Prokka:OIDGCHHC\_00114"  
/translation="MTSDQLEKKFNIFYKDYEDRNEYCDLLNEAIRKDKENLQKN"

ORIGIN

```

1 atatttatca ttagcttctt tgatatattt catatctgca aagcgaaaat tatatttagg
61 atcttttaga ctaagccat actcatcaaa taaataatct aaaatagaaa aatcattatt
121 atttgctcca caagtgcgag ctgctctcat tatcaaataa taaggatcaa ataaaggata
181 ttcttcgta tcatttttaa aatgaagctc ataacaagaa atttttacag gataatcttt
241 taaaatctct tttacttttag ctaaattatt atctcttata gcctcaagaa ctaaactctc
301 taacttatcc ttttcctcat aactcatagc cttaatatct tctaattgtt tcattgtttgc
361 tcctttaatt tttttgtagg ttttcttttt ctttatcctt tcttatggct tcatttaata
421 aatcacagta ttcattacga tcttcataat cttataaaaa gatattaaat ttcttttcaa
481 gttgatcgga agtcattgca cctgcagctt ttaaaag

```

//

LOCUS OIDGCHHC\_33 504 bp DNA linear 12-APR-2021

DEFINITION Campylobacter species strain strain.

ACCESSION

VERSION

KEYWORDS .

SOURCE Campylobacter species

ORGANISM Campylobacter species  
Unclassified.

COMMENT Annotated using prokka 1.14.6 from  
<https://github.com/tseemann/prokka>.

FEATURES Location/Qualifiers

source 1..504  
/organism="Campylobacter species"  
/mol\_type="genomic DNA"  
/strain="strain"

ORIGIN

```

1 cattattact agcccaaaaa tgcataggag accagcccat tttgtcgcga tatacttcaa
61 atttagctcc atgatttgct aggtattgga taatttgggg gtttggatta tcagcagtta
121 ggatataagc atagattaa gcttctttgt aaatgctagg attatcttcc atgtatctta
181 ctacaatata tttatcatta gcttctttga tatatttcat atctgtaaag caaaaattat
241 atttaagatc ttttagactt aagccatact catcaaataa ataatactaaa atagaaaaat
301 cattattatt ttcttcacaa gcatatgcag ctctcattat caaataataa ggatcaaata
361 aaggatattc ttcattttca tttttaaaat gaagctcata acaagaaatt tttacaggat
421 aatcttttaa aatctctttt acttttagcta aattattatc tcttatagcc tcaagaacta
481 aatcttctaa cttatccttt tcct

```

//

>>BfR-CA-15839\_min\_cov\_30 putative plasmid location

LOCUS BKOFBKEE\_1 7180 bp DNA linear 12-APR-2021  
DEFINITION Campylobacter species strain strain.  
ACCESSION  
VERSION  
KEYWORDS .  
SOURCE Campylobacter species  
ORGANISM Campylobacter species  
Unclassified.  
COMMENT Annotated using prokka 1.14.6 from  
<https://github.com/tseemann/prokka>.  
FEATURES Location/Qualifiers  
source 1..7180  
/organism="Campylobacter species"  
/mol\_type="genomic DNA"  
/strain="strain"  
gene 348..851  
/locus\_tag="BKOFBKEE\_00001"  
CDS 348..851  
/locus\_tag="BKOFBKEE\_00001"  
/inference="ab initio prediction:Prodigal:002006"  
/codon\_start=1  
/transl\_table=11  
/product="hypothetical protein"  
/protein\_id="Prokka:BKOFBKEE\_00001"  
/translation="MKILEKDFDLICKIYIQWKELNNNIKKFSSRGVNFPCISEPIV  
CYAFNYNWNNNNETGDATSDSGELIEIKATSNFSDLSFSPNTKFDKLIFVRLDQER  
DLAYIYDLELNFEQFQILEVNKKETVLDQQKQNRPRRLSLIQYIEKEKIEPLYVDFI  
KKIVTKN"  
gene 921..1844  
/locus\_tag="BKOFBKEE\_00002"  
CDS 921..1844  
/locus\_tag="BKOFBKEE\_00002"  
/inference="ab initio prediction:Prodigal:002006"  
/inference="similar to AA sequence:RefSeq:ASE91810.1"  
/codon\_start=1  
/transl\_table=11  
/product="DNA (cytosine-5-)-methyltransferase"  
/protein\_id="Prokka:BKOFBKEE\_00002"  
/translation="MKVASFFAGVGGIDLAFSNHDIVYVNEIDKNATKTYKFNFDFEI  
DCRDIQTVNEKELPDFDILLGGFPCQAFSVAGYRKGFEFSRGNLFFDIIRIAKEKKPK  
IIFLENVKNLVSHDCGKTFNIIILKSLESLGYVVKYDVLNAMHYGNTPQNRERIYIVCF  
KNKKQYKDFNPNPIFLNNKIDNIVDFNLKVDDKFYYTEKNFKHYEMLLQNITKKNVI  
YQWRRKYVRENKSNVCPTLTANMGTTGGHNVPLVLTKHGIRKLTPEKCFMFQGFPNYSYK  
LPDIANSPLYKQAGNSVCVKVIQRIADRISN"  
gene complement(2128..2328)  
/locus\_tag="BKOFBKEE\_00003"  
CDS complement(2128..2328)  
/locus\_tag="BKOFBKEE\_00003"  
/inference="ab initio prediction:Prodigal:002006"  
/codon\_start=1

```

/transl_table=11
/product="hypothetical protein"
/protein_id="Prokka:BKOFBKEE_00003"
/translation="MGFKNINTEKASINFINNARGDKINTQKRDKKILVSFTQDEYDR
VKESALQIGMGVNQYIRYKLFII"
gene complement(2329..3009)
/locus_tag="BKOFBKEE_00004"
CDS complement(2329..3009)
/locus_tag="BKOFBKEE_00004"
/inference="ab initio prediction:Prodigal:002006"
/inference="similar to AA sequence:RefSeq:ASI88294.1"
/codon_start=1
/transl_table=11
/product="Plasmid partitioning protein ParA"
/protein_id="Prokka:BKOFBKEE_00004"
/translation="MIISICNEKGGSGKSTLAVNLSRLTEDGDSILLFSDPQRSTE
VFINIRNNSNLKQNFKHSFDINLLNSGFKNELNNYDAIIIDTGGDRSREMRKAMLLSN
VIIIPTIASQYDVSVDHMLNIYKEVKLINKNIILLILINRVSPNPFLIKELNNLIDY
IHEKKEVNNLNDVFLLESVLYERQAYKRAVIEGKSISEFCDKNDKALKDFEKFYQEIF
QILKNKDK"
gene complement(3589..4917)
/locus_tag="BKOFBKEE_00005"
CDS complement(3589..4917)
/locus_tag="BKOFBKEE_00005"
/inference="ab initio prediction:Prodigal:002006"
/inference="similar to AA sequence:RefSeq:APA51640.1"
/codon_start=1
/transl_table=11
/product="mobilization protein"
/protein_id="Prokka:BKOFBKEE_00005"
/translation="MSYDEIEKVKRSAYTKTASESTKRNYISSGNFKKSTSFQVFHNA
NVRPDYAIGGELVFDLGGYEAL ELKNKIVSEAKEAYEKNKSPKAPKFKAKSYEWSLVV
NIKPDTSMN DLKNLSKHFQEKYGFQCYQIAIHRDEGHFN EQGKELINHHAHMEFITLD
KETGKNNFRREKISPKVLR EIQTEIAEILGMERGEDKRISGAKRIEPRAYAALKEKEK
REKKRNINLEQEQEKEQFLNKSEYKKIIENFRKSQINQGLDKDFFKELSELKKNFQEI
KEDNLS ELLNDILREHLERIEK LKKENSILKAENELLKQKEPKNDNNIDQEQKNASER
NFEPKNDNNTEDKKIFFEKLATYRLNEGLSKIYSKPLKRIVEPETEAKKKERIKILTE
TMEKTEAYLPETLKKWLENNKDIDLKEILVAYQNTLSKELKQSKSIYKGR"
gene complement(4921..5085)
/locus_tag="BKOFBKEE_00006"
CDS complement(4921..5085)
/locus_tag="BKOFBKEE_00006"
/inference="ab initio prediction:Prodigal:002006"
/codon_start=1
/transl_table=11
/product="hypothetical protein"
/protein_id="Prokka:BKOFBKEE_00006"
/translation="MDYEKYSKMNL RQLINAYTNAEKKEKLLIDDFQKKLDENKNLME
FLKTKIKESL"
gene complement(5488..5823)
/locus_tag="BKOFBKEE_00007"
CDS complement(5488..5823)
/locus_tag="BKOFBKEE_00007"
/inference="ab initio prediction:Prodigal:002006"

```

```

/codon_start=1
/transl_table=11
/product="hypothetical protein"
/protein_id="Prokka:BKOFBKEE_00007"
/translation="MSEKTKLQIAEHILKNCYWGNTTMTPSFIVEHIQDKDFAKRIFS
AIFQNSLTMFEDLKIIDNEEWIKEFIISQNQRLGYHKRFYYEERLDELIAHYGIKNAG
KRREVFHIA"
gene complement(5820..6857)
/locus_tag="BKOFBKEE_00008"
CDS complement(5820..6857)
/locus_tag="BKOFBKEE_00008"
/inference="ab initio prediction:Prodigal:002006"
/inference="similar to AA sequence:RefSeq:ALW35761.1"
/codon_start=1
/transl_table=11
/product="replication initiation protein"
/protein_id="Prokka:BKOFBKEE_00008"
/translation="MSDIVKYHNDFNKIQLPNFSESEQNLLFLIFAKIKEKGIDNVIN
IYANDFKINQKLSNSREYLTENINSLKYKFFKANFKQIIETKTEVIHKYVNLFETMEI
HYVKRNPDDGYDGSTLFNRITLKNPDFAYLVNQLTTNFTAFELEEFISLSGRYAKTL
YRLKQFRRTTGKARFEWEEFCRIMDIPQDYRQSEIDKRIKPAIKELSKERNLFDQMR
VPFKNLAYEKEKAKGRGQGGKVSGITFTFKPENIEMQKLENESQKIMSDEQKYLKILN
NMKLNQVRFNYNDKLWQFNDDFNEFKIIAVELIRDEYENLNFGNHMYFNAKNQEQQF
KMIEIFRKGIR"

```

ORIGIN

```

1 catgttaagg gtatattgtc aatatttgtc cccttaatac ctacaatttg tccccttaat
61 acctacaatt tgtcccctta atacctacaa tttgtcccct taatacctac aatttgtccc
121 ctaataacct acaatttgtc cccttaatat tccatatagc tcccatcata tagtgcttag
181 aaagatgcct aaaaataata aaaataataa aaaaatagaa aaatattacc atagtttcta
241 aatctactaa atatattatg atttattgta ttcttacaat gaaatagtag taaatcgaga
301 tttaaaaata ttttgtatat aatattttaa gtttagacgc aagttgtatg aaaatacttg
361 aaaaagattt tgacttaatt tgtaaaattt atattcaatg gaaagaatta aataataaca
421 taaaaaaatt tagttctaga ggtgtaaatt ttcctgattg tatttccgaa cctatagtat
481 gctatgcttt caactataat tgggaataaca ataacgaaac aggagatgct actagtgatt
541 caggtgaatt aatagaaata aaagcgactt cgaatttcga tagcgattta agttcttttt
601 cgccaaatac taaatttgat aagctaattt ttgttagatt agatcaagaa agggatttag
661 cttatattta tgatttggaa ttaaattttg aacaatttca aattctagaa gtgaataaaa
721 aggaaactgt tttagatcaa caaaaacaaa ataggcgtcc taggttaagt ttaattcaat
781 atattgaaaa ggaaaagata gaaccgcttt attatgttga ttttataaaa aaaatagtta
841 ccaaaaatta aagaaaggag tggcgtctaa actcctttct ttaaaaaagc agcatgctgc
901 aattataatg gagataaaat atgaaagtgg cttctttttt tgccggtgta ggtggtattg
961 atttggcctt tagtaatcat gatatcgttt atgttaatga aatagataaa aatgctacaa
1021 aaacatataa atttaatttt gatgtcgaat tagattgcag ggatatacaa actgttaatg
1081 aaaaagaatt gcccgatttt gatattttat taggagggtt tccatgcaa gcattcagtg
1141 ttgctgggta tagaaaagga tttgaagatt ctagaggaaa tctttttttc gatattatac
1201 ggattgcaa agaaaaaaa ccaaaaataa tatttctaga aaatgtaaaa aatttgggat
1261 cgcattgatt tggaaaaact tttaatatta tattaaaatc attggaaagt ttaggttatt
1321 atgttaaata tgatgtttta aatgcaatgc attatggaaa tacaccacaa aatagagaaa
1381 gaatttatat gtttgtttt aaaaataaga aacaataata agattttaat tttccaaacc
1441 caattttttt gaacaataaa atagacaata ttgtagattt taatttaaaa gtatagata
1501 aattttatta tactgaaaaa aattttaaac attatgaaat gttattgcaa aatataacaa
1561 aaaaaaatgt tatttatcaa tggagaagaa aatatgtaag agaaaataaa agcaatgtat
1621 gtcctacttt aacagcaaat atgggtactg gtggacacaa tgtaccgta gtcttaacaa
1681 aacatggaat aagaaaacta acccctaaag aatgctttat gtttcaaggt tttccaaata

```

1741 gttataaatt acctgatata gcaaatagcc atttatataa acaagcagga aatagtgtat  
1801 gcgtaaagt gatacagcgt atagcagatc gtatttcaaa ttagaaaaat ttttatattt  
1861 tatttggtaa acaaccttta tatgattttt aaaattaaaa aaattctgat ttaaaatata  
1921 gtttaagttt ttaaaaaact taaagcaata aattcccatt tttcataac ttttaagttt  
1981 taacttttta cctcgaaact taaatataaa acaaaatgta ttaaaacaat ggagtagcca  
2041 ttttttatc aaaaaatata aagaatgaaa attgcacttt tcaatacaaa atatatttta  
2101 catatttata taaaatata atatttatta tataaataat ttatatctta tatactgatt  
2161 aactcccata cctatttgca aagcactttc tttcacacgg tcatactcat cctgtgtgaa  
2221 actaaccaat atttttttat ctcttttttg tgtattaatt ttatctccac gagcattatt  
2281 aataaaatta atacttgctt tttctgtggt gatattttta aaccccattt atttatcctt  
2341 attttttaat atttgaaaa tttcttgata aaatttttca aaatctttca atgctttatc  
2401 atttttatca caaaactcac taatactctt tccttctatt acggctcttt tgtaggcttg  
2461 ctttcatat aaaacgcttt ctagcaaaaa gacatcattt aaattattga cttctttttt  
2521 ctcatgaata taatcaatta gattatttaa ttctttaatt aaaaatggat taggagagac  
2581 tctattgatt aatattaata atataatatt tttatttatt aatttaactt ctttatatat  
2641 attcaacata tgatcaagaa cacttacatc atattggcta gctatggtag gtataattat  
2701 tacatttgat aaaagcatag cttttctcat ttcttacta tctctaccac ctgtatcaat  
2761 aataatagca tcgtaattgt ttaattcatt tttaaaacca ctatttagca aattaatc  
2821 aaaactgtgt ttaaaatttt gttttaagtt agagtgttt ctgatattga taaaaacttc  
2881 agttgatctt tgcggatcac tgtcaaacag caaaatgctg tcaccatctt cagttaatct  
2941 tgaagataaa ttaacagcta aagtgccttt accactaccg ctttttcat tgcatataga  
3001 tataatcatt atatactctt tatatattta ttatatttat attatatact attttttgag  
3061 taattgatca aaaacttgat ttttgcttta ttaaaaagtt tatatttata ccatttgccc  
3121 ttttaatatt tcgctatctc ctatcatata gtgcttagaa agatatctaa aaatatataa  
3181 aaataaaaaa gaagttttat aaataagcca caattgcagt atttctgtag gttatatcat  
3241 agatataacc tacataaaat atcaaaaaaa cgctttacaa atgcttaaaa tttgaaatth  
3301 taaaattttt atggtataat atcattcaga ataacattga tttatagtgt tattgattaa  
3361 ttttataagg aggataaatg actctactag aattagtagc aatttgctac tatttattaa  
3421 caaattgctg taatgtatth taacagaaat ttcatatag caaatttttt ttaattataa  
3481 attagacggg gggcttttat tagctttaag ttaacttcgc acccctgtht ccaaaatcat  
3541 agcacctata aggtgcgatt tgctaagcta aaaagggaga gaaagtgttt atctgcctth  
3601 gtaaatactc ttgctctgth ttaattctth gctaagggtta ttttgataag cgacaagtat  
3661 ttcttttaaa tcaatatctt tgttattthc aagccattth tttaaagtht caggtaggta  
3721 agcttctgth tttccattg tttctgttaa aatttttaatt ctttcttht ttttgcttc  
3781 ggthtcaggc tccacaatth ttttaagggg ctggaataa atcttactta atccttcat  
3841 cagtctgtaa gtggctaath tttcgaaaaa tattttttta tcttctgtht tattatcgtt  
3901 tttcggctcg aaattgctg ctgaagcgtt ttttgctct tggtcgatat tattatcgtt  
3961 tttcggctct ttttgcttta aaagctcatt ttcggcttht aaaatgctat tctctthtth  
4021 taactthtca atgcttctta aatgctctct taaaatatcg tttaaaagct ctgataaath  
4081 gtcttcttht atctcttgga agthcttht tagttcgctt aactctthga agaaatctth  
4141 gtcaagccct tgattaatht gactthtctt aaaattthca atgatttht tatactcgtt  
4201 tttattthaa aattgctctt tttcttgctc ttgctctaaa ttaatgtht cttthtctc  
4261 cttthtthtcc ttttctthta aggctgcata agctctaggc tctatgctgth ttgctcctgct  
4321 tattctctta tcttcgccac gctccattcc taagattthca gctgatttcg tttgaatthc  
4381 tcttaagact tttgggctta tttthtccacg cctaaagthg tttttacctg tttctthtgc  
4441 aagagtgata aattccatat gtgctggtg gtttataagc ttttgcctth gctcgtthaa  
4501 atgccctthca tcgctggtg tagcgttht atagcactga aagcctgatt tttctthgaa  
4561 atgthtagaa aggtthttht aatcattcat tgaggthtca ggctthgat tgcacaactaa  
4621 gctccattca tagctcttag cttthaaath tggagctthg gggctthtth tttthtcata  
4681 ggcttctthc gcttccgaaa ctatcttht tthaaagctct aaggctthcat aaccgcctaa  
4741 atcaaaaaca agctcaccgc ctattgctga atcaggtctt acattggcat tatggaagac  
4801 ttgaaaagaa gthgatttht taaaattthc gctthgaaata taattcttht ttgtgctthc  
4861 actthgctgth tthgtgthaa cactthttht aactthtthca atctcatcgt aagacattth  
4921 ttataaactt tctthgattt ttgtthtthaa aaactcattt aaattthtth tctcatcaag



```

4981 ttttttttga aaatcatcga ttaatTTTTT ttctTTTTTT tctgcgTTTg tgtaagcgTT
5041 tatcaattgt cttaaattca ttttagaata tttttcataa tccattTTTT ttccctTTTT
5101 tgaaaaaata taaatgtaat cgagcttTgT agattatagc atattTTTTa aaaacaaatt
5161 atagaacttt tttagttcgg ataatttgca aattatccaa tcatattTTTa taaataaaaa
5221 aatgattaat aatttgcacc gcgtggcttt gcattaattc gcaagctcat ttaatgtaaa
5281 agtttaataa aaattattta tgatagaatt ttattcgact tcctaaatga aagtttagcg
5341 aagaattagc ttatctTTTt gataggtTgc cccgtcttag agcggggata ttaaattcct
5401 tgcttattgt atttaggaca ttcaaatatt ctatctTTTt aattttaaTc atctttgata
5461 tatccacaac aactacaagt ttttagagcta ggcaatgaaa tgcacttTct ttctTTTTcc
5521 tgcattTTTT atcccataat gtgcgataag ctctgcaagc ctttctTcat aataaaatct
5581 tttgtgatag cctaactctt ggTTTTgaga aatgataaat tcttttatcc attcttcatt
5641 atcgataatc tttaaatctt caaacattgt gagtgaattt tgaaaaatgg cactaaaaat
5701 tctTTTTgca aagtctttat cttgtatatg ttctactata aaactagggg tcatagtagt
5761 atttcccaa tagcaatttt ttaaaatatg ttctgcgatt tgaagttTtg tttttcgtct
5821 catctgatac cttttctaaa gatttcaatc attttaaaaa actgctctTg atttttagca
5881 ttaaagtaca tatgatttcc aaagtTtaaa ttctcgtatt catctcttat aagctctact
5941 gcaataattt taaattcatt aaaatcaaaa tcgttaaatt gccaaagctt gtcattataa
6001 ttaaacttaa cttgattaag tttcatattg tttaaatct ttaaataatt ttgctcatcg
6061 ctcaattttt tttgactttc attttctagc ttttgcattt cgatattTtc aggtTtaaaa
6121 gtaaaggtaa tacctgaac cttgccacct tgccccgcc cttttgcttt ttctTTTTca
6181 taggcaagat ttttaaagg cactcgcatt tgatcaaaaa gattgcgTtc tttagaaagt
6241 tcttttatgg caggtTtaat aattctTTTt tcgatttTgc tttgtctata atcttgcggT
6301 atatccataa tcctacaaaa ctcttcccat tcaaatcgtg ctttacctgt agttctaaat
6361 tgcTTtaaaa ggcggTaaag tgTTTTagca tatctaccgc taagagatat aaattcttca
6421 agctcaaaag ctgTaaaatt agtagTtaat tgattaacta aataagcaaa atcagggttt
6481 attttaggg ttattctgtt aaataaagtg cttcatcat atccatcatc aggatttctt
6541 ttaacatagt gtatttccat tgtttcaaac aaatttcat atttgtgtat aacttctgtc
6601 tttgtttcta tgatttgttt aaaatttgcc ttgaagaatt tatatttttag gctattgata
6661 ttctctgtta aatattctct tgaattagaa agtttttgat taattTtaaa atcattggca
6721 tagatattaa ttacattgtc tatacccttt tctTtaatct ttgcaaagat taaaaataaa
6781 aggttttgct cttgctctga aaagttaggc aactgaattt tattaaaatc attatggTat
6841 ttaactatat cactcataga ttttcttat aagccctaag gcaaggggct tttctgccc
6901 tgcggtttcg ctagaaaaat acttcaactt taagTtTaaa aaacctaaaa tttaggtata
6961 atctcaaaa acgcttacta tgtcgtttca tagtcaagcc tttagggtta tttccgcaa
7021 gagtgaaaac tcaaggcgga tttttattg tagcatgtta agggTatatt gtcaatattt
7081 gtcccTtaa tacctacaat ttgtcccctt aatactaca atttgtccc ttaataccta
7141 caattgtcc ccttaatacc tacaattgt cccTtaata

```

//

>>BfR-CA-15840\_min\_cov\_30 putative plasmid location

```

LOCUS      HKBNLMBC_1                4687 bp    DNA        linear      12-APR-2021
DEFINITION Campylobacter species strain strain.
ACCESSION
VERSION
KEYWORDS   .
SOURCE     Campylobacter species
  ORGANISM Campylobacter species
            Unclassified.
COMMENT    Annotated using prokka 1.14.6 from
            https://github.com/tseemann/prokka.
FEATURES   Location/Qualifiers
            source                1..4687

```

```

/organism="Campylobacter species"
/mol_type="genomic DNA"
/strain="strain"
gene complement(117..386)
/locus_tag="HKBNLMBC_00001"
CDS complement(117..386)
/locus_tag="HKBNLMBC_00001"
/inference="ab initio prediction:Prodigal:002006"
/inference="similar to AA sequence:RefSeq:AMK28635.1"
/codon_start=1
/transl_table=11
/product="addiction module toxin RelE"
/protein_id="Prokka:HKBNLMBC_00001"
/translation="MKYNIKYSSKFKKHYKLLNTKEQQTETIIRLANDGPLEPKYK
DHALKGDFLGFRECHIKPDLILLIYQKQDDKIILYCFDIGSHSELF"
gene complement(386..700)
/locus_tag="HKBNLMBC_00002"
CDS complement(386..700)
/locus_tag="HKBNLMBC_00002"
/inference="ab initio prediction:Prodigal:002006"
/codon_start=1
/transl_table=11
/product="hypothetical protein"
/protein_id="Prokka:HKBNLMBC_00002"
/translation="MLAQEKQDNSDYIYIEKLLTKSERQLKVMLDTLEKETIKIQA EK
AKLESKLDKIKKGHFVKDALMKKWRTPSAELLEAMQELKNGGGTLCRSMEEFDRQMA
ED"
gene complement(871..1971)
/locus_tag="HKBNLMBC_00003"
CDS complement(871..1971)
/locus_tag="HKBNLMBC_00003"
/inference="ab initio prediction:Prodigal:002006"
/codon_start=1
/transl_table=11
/product="hypothetical protein"
/protein_id="Prokka:HKBNLMBC_00003"
/translation="MAKNTDIVELKEGFTRNQSNVSNAIANARTKMTALELKTIFYQVS
TLIQMDDTEFKEYEISVDFL KALNISDSNREQVVKLCRRLIRQVFEINQENGDYIAY
TIFSRMHYKHKEQKISMKFNEEFRPFLLELKQFTKIQQVKYIKSFDKYSIRFYALLK
DYRKMSQRDFNLENIFNIFELPKTYNYTRFYQYVLKPAIDEINAKSDLWVSEPEIIGK
KGKKITDIRLYFGNKNEKMSDDFTKELIKQYNKFKSFNVFANCRYLADGFNTINDLMK
ITRISTEKNTYFRAYHSNSFGEEESCIIIGTPNKDDFLNSLANGIYRAINLIYEKEKKEQ
LPTMQWQDDKDKLKRFSILKEWQENPEAKIY"
gene 2315..2965
/locus_tag="HKBNLMBC_00004"
CDS 2315..2965
/locus_tag="HKBNLMBC_00004"
/inference="ab initio prediction:Prodigal:002006"
/codon_start=1
/transl_table=11
/product="hypothetical protein"
/protein_id="Prokka:HKBNLMBC_00004"
/translation="MNNIDDIRIKEKDYDITIKYIEWCNELKNKNIELQDKIVMTIST
ALFGIIIVNLDKISLLYTHPWTKILFITLIILNSVTIIFLLISLKMANKSIENDIESV

```

YNNTIKRKYFIAKWTQYIYLLSFAFVTIIFCIILCIVSYKELTMDKKQENNIHMCN  
 ESYLGTSKPILFSDYLSKQNNQENNNKINSNNTDNSSTLNLNNIQSSTLENEKEKD"  
 gene complement(2962..4677)  
 /locus\_tag="HKBNLMBC\_00005"  
 CDS complement(2962..4677)  
 /locus\_tag="HKBNLMBC\_00005"  
 /inference="ab initio prediction:Prodigal:002006"  
 /codon\_start=1  
 /transl\_table=11  
 /product="hypothetical protein"  
 /protein\_id="Prokka:HKBNLMBC\_00005"  
 /translation="MGAISSINFKKSNAIQTRHNDRLPPNYLIGGDCECNRTHKEAL  
 TLKNQIIKNGIKKYTEITGQKFQAKSYEWSSVNIKPDTTMQDLERLALFLNKYGFQ  
 CYQIAIHRDEGHINEQGQKEINHHAHLEFITLENKENGRNMWRRELITPKVLRQMSEV  
 AEILGMQRGQDKRITKRQRIEPRKYAQMKEAEKDLKQELLSAKEIKERLEAERKAWI  
 LEKNHTAEFYKALKELKNKIYTDKTELEKEINTLKERLKSLGDENTLLREENRNLKQE  
 MGLNEVNILAYFPFDFKTKLISEVYQNIKHDFSNYFYDKEKKEFSNRKLDKFKVQDN  
 GNSIALNSSNNQNMSEKVSMLMKMAMVKGWDLNLDNLIKGSDKFAECYKQIAEIQKNK  
 IKELESNLKTKEQKNDEIHQKENKNDLKPISDTQNTKDKTELEEINEQIEENKKIEK  
 LLNNRNLYFVKELDKNNLSDFDKNEIIKISEDFINNYGESIWLDRDRIKDKDYKCIV  
 TYLKDELPRFPNQEEYEAENKLTSSISLELRQKKRKLLENPFKNKLQDFTNQQTRKND  
 QGFSR"

ORIGIN

```

1  cgtgcgatta cattcacaat cgccaccaat taagtaatta ggcggtaa at ctctgtcatt
61  atgccttggt tgaatagcat tgcttttttt aaaattaatg ctagagatag caccattaa
121 aataactcgc tatgtgagcc tatatcaaaa caataaagaa ttattttatc atcttgtttt
181 tggtagatta ataacaaatc aggcttaatg tggcattctc taaaaccta aaaatcacct
241 tttaaagcgt gatctttgta ttttggttcc aaaggcccat cattagctaa acgctcaata
301 attgtctttg tttcttggtg ttctttgggtg tttagcttct tgtaatgctt tttaaattta
361 gaagaatatt tgatattgta tttcattaat cttccgccat ttgtctgtca aattcttcca
421 ttgatctaca aagcgttcca cgcctatctt ttaactcttg catagcttct aaaagttctg
481 cactaggtgt tcgccatctt ttcattaaag catcttttac aaagtgcctt tttttaattt
541 tgtcttttag tttgctttct agctttgctt tttctgcttg aatttttatt gtttcttttt
601 ctaaagtgtc aagcattact tttagctgtc tctcgctttt tgttttta at ttttcaatgt
661 agatataatc agaattatct tgtttttctt gtgctaacat tgcttcgctc cttttaaaaa
721 atatataatt gaaattatga aattataaca ttttttttaa aacaaattat tatcttattt
781 taataagggtg gataatttgc aaattatcca cttttacaag caaagtgtta atttgaactg
841 cgtgacttta tatattaatt cataagttaa ttaatatatt tttgcttctg gattttcttg
901 ccattctttg agtatgcttt taaatctttt taatttatct ttatcatctt gccattgcat
961 tgtaggtaat tgttcttttt tctctttttc atagattaga ttaattgctc tataaattcc
1021 attggctaaa gaatttaaaa aatcatcttt atttggagtt ccaataatac aactttcttc
1081 accaaaacta ttagaatggt aagctctaaa gtatgtatct ttttcggtgc ttattcttgt
1141 tttttcattt aaatcgttga tagtggttaa accatctgca agataacgac aattagcaaa
1201 tacattaaag cttttaaatt tgttgtattg tttgataagt tcttttgtaa aatcatcgct
1261 cttttttctg tttttattcc caaaatatag gcgtatatca gttatctttt tacctttttt
1321 tcctatgatt tcaggctcac ttaccacaaa atcactttta gcgttgattt catcaatagc
1381 gggtttttagg acatattgat aaaaccttgt gtagttgtat gtttttggtg actcaaatat
1441 attaaaaata ttttctaggt taaaatctct ttggctcatt ttacgataat cttttaaaag
1501 ggcataaaag cgtatagaat acttactatc aaagctttta atgtatttta cttgttgtat
1561 ttttgtaaat tgtttttagtt ctaataaaaa ggggcgaaac tcttcattga atttcattga
1621 aatcttttgc tctttatggt tatagtgcac tcttgaaaag attgtgtaag caatataatc
1681 gccattttct tggttgattt caaatacttg tcttatcaaa cgcctacaaa gctttactac
1741 ttgctctctg ttgctatcgc taatatttaa agcttttaaa aaatcgctca cgctgatttc
1801 atactcttta aactctgtat cgtccatttg tataagcgta gaaacttgat aaaaggtttt
  
```



SOURCE Campylobacter species  
 ORGANISM Campylobacter species  
 Unclassified.

COMMENT Annotated using prokka 1.14.6 from  
<https://github.com/tseemann/prokka>.

FEATURES Location/Qualifiers

source 1..4059  
 /organism="Campylobacter species"  
 /mol\_type="genomic DNA"  
 /strain="strain"

gene complement(1057..2445)  
 /locus\_tag="HKBNLMBC\_00006"

CDS complement(1057..2445)  
 /locus\_tag="HKBNLMBC\_00006"  
 /inference="ab initio prediction:Prodigal:002006"  
 /codon\_start=1  
 /transl\_table=11  
 /product="hypothetical protein"  
 /protein\_id="Prokka:HKBNLMBC\_00006"  
 /translation="MSYDEIEKVKRSAYTKTASENTRNYISSGNFKKSTSFQVFNHNA  
 NVRPDYAIGGELVFDLGGYEAL ELNKIISEAKEAYEKNKSPKAPKFKAKSYEWSLVV  
 NIKPDTSMNDLKNLSKHFQEKYGFQCYQIAIHRDEGHFNEQGEK LINHHAHMEFITLD  
 KETGKNNFRREKISPKVLREIQTEIAEILGMERGEDKRISGAKRIEPRAYAALKEKEK  
 REKKRNINLEQEQEKEQFLNKSEYKKIENFRKSQINQGLDKDFFKELSELKKNFQEA  
 KEDDSELNDILREHLERIEKLLKENSILKAENELKQKEQKNNINIDQEENASKR  
 EIEPKNDKISKLEDDFNFKVINPNMSEENYFKLKKLYTENNNLVEDKNFPNYDYL  
 VDFFKAPQNINDLIVQKASIMKDVELQENIQFYLKKTLEKHSKDHTQDLVKTTKNYR  
 QNYLKKGLGFER"

gene complement(2449..2613)  
 /locus\_tag="HKBNLMBC\_00007"

CDS complement(2449..2613)  
 /locus\_tag="HKBNLMBC\_00007"  
 /inference="ab initio prediction:Prodigal:002006"  
 /codon\_start=1  
 /transl\_table=11  
 /product="hypothetical protein"  
 /protein\_id="Prokka:HKBNLMBC\_00007"  
 /translation="MDYEKYSKMNL RQLINAYTNAEKKEKKLIDDFQKKLDENKNLME  
 FLKTKIKESL"

gene complement(2844..3881)  
 /locus\_tag="HKBNLMBC\_00008"

CDS complement(2844..3881)  
 /locus\_tag="HKBNLMBC\_00008"  
 /inference="ab initio prediction:Prodigal:002006"  
 /inference="similar to AA sequence:RefSeq:ALW35761.1"  
 /codon\_start=1  
 /transl\_table=11  
 /product="replication initiation protein"  
 /protein\_id="Prokka:HKBNLMBC\_00008"  
 /translation="MSDIVKYHNDFNKIKLPSFTEQEQLLFLIFSKIKEKGIDNVIN  
 LYANDFKINEKLSNSREYL TENINSLKYKFFKANFKQIIETKTEVIHRYVNL FETMEI  
 HYIKRNPDDGYDESTLFNRITL KINPDFAYLVNQLTTNFTAFEEFISLSGKYTKTL  
 YRLLKQYRTTGKAYFKWEEFCRVMDISEKLAMRDIDKSILKPVIKELSKERNLFDQMR  
 VPFKNLAYEKEKTAGRGRGGKVSGIVFTFKPENIEMQKLENESQKIMSDEQKYLKILN"

NMKLNQVRFNYNDKLLWQFNDFDFNEFKIIAVELQRDEYENLNFANMHMFNAKNQEQFF  
KMIDTFRNGIR"

ORIGIN

1 cggttttgct agaaaaatac ttcaacttta agtttaaaaa acctaaaatt tagatataat  
61 ctcaaaaaac gttactatg ttgtttcata gtttaagcctt taaagggtta tttccgcaa  
121 gagtgaagac tcaaggcgga ttttttattg taacatatta agtaggtatt gtcaaataat  
181 ataccactta atacctaaa tttaccact taatacctac aatttaccca cttataacct  
241 acaatttacc cacttaatac ctacaattta cccacttaat atttcgctag accccatcat  
301 atagggtta gaaagccacc taaaaatata aaaaatata aaaaaataaa aaaattcgcg  
361 tatgcgtacg cgcgcttgat aataaatata aattaatatt atatttttat aagcgatttt  
421 cattttttgt ttaaaaaacg aatttttgag aaaaactcgg taattctcgt ttacacatta  
481 gggcgggtggc ttgttcgttc gtttagctcta ggctaacttc acgccccgc accccatttc  
541 gcaaatcata acaccttata ggtgtgattt gctaagctaa aaagggaata atgtgtgatt  
601 tgctaagcta aaaagggaata aatgtgtgat ttgcttcaac tttatttatt aaagtcatta  
661 tttacatagt tttaaaatta ttttttatta aattttaagc ataaataaac tataattgag  
721 aggtttctct ttcatattaa agataaacgt gcaaaatata tttaaagaaa ggagggtttat  
781 aatgctttat cttatcatag atagcgaatt gtttagatata tttcatttga caattttaat  
841 tatcaaatca ttgcctattt aataggtaat gattatcttg ttaaccttat ctattaattt  
901 atctttaagc tccagtgtgt gtattatttt tttattcatg acgtcgaat tatatcataa  
961 aatatataa ataaccttaa aaaactatta atatttatta aaaattactt taaatatact  
1021 tataaatata tttataagta ttttaaat tttaaattat ctttcaaatc ccaaaccttt  
1081 ttttagatag ttttgacgat aatttttagt tgttttaact aaatcttgcg tatgatcttt  
1141 gctatgcttt tcaagtgttt tcttaagata gaattgtata ttttcttgca attcaacatc  
1201 tttcataatt gaagcttttt gcaactataa atcattaata ttttgtggtg ctttcttaa  
1261 gaaatctact aaataatcat agtttgaaa gttcttatct tctactaat tattgtaatt  
1321 ttcagtgtaa agttttttaa gtttgaaata gttttcttca ctcatatcat ttggattaat  
1381 attttttaca aaattgaaat catcttctag ctttgaaatt ttatcgtttt tccgctcaat  
1441 ttcgctgttt gacgcgtttt cttgttcttg gtcgatattt atattgtttt tttgctcttt  
1501 ttgcttttaa agctcatttt cagcttttaa aatgctattc tcttttttta atttttcaat  
1561 gcgttctaaa tgctctctta aaatatcgtt taaaagttct gataaatcat cttcttttgc  
1621 ttcttggaag ttctttttaa gttcgttaa ctctttgaag aaatctttgt caagcccttg  
1681 attaatgtga ctttttctaa aattttcaat gattttttta tactcgcttt tatttaaaaa  
1741 ttgctctttt tcttgctctt gctctaaatt aatgtttcgc tttttctccc ttttttctt  
1801 ttcttttaag gctgcataag ctctaggctc tatgcgtttt gctccgctta ttctcttatc  
1861 ttcgccacgc tccattccta agatttcagc gatttcggtt tgaatttctc ttaagacttt  
1921 tgggcttatt ttttcgccc taaagttgtt tttacctgtt tctttgtcaa gagtgataaa  
1981 ttccatagtg gcgtggtggt ttataagctt ttcgccttgt tcgttaaaat gcccttcac  
2041 gcggtgtata gcgatttgat agcactgaaa gccgtatttt tcttgaaaat gtttagaaag  
2101 gttttttaaa tcattcattg aggtatcagg cttgatattg acaactaagc tccattcata  
2161 gctcttagct ttaaattttg gagctttggg gcttttattt ttttcatagg cttctttcgc  
2221 ttccgaaatt atcttatttt taagctctaa ggcttcataa ccgcctaat caaaaacaag  
2281 ctaccgcct attgcgtaat caggtcttac attggcatta tggagacct gaaaagaagt  
2341 tgatttttta aaatttccgc ttgaaatata atttcttttt gtgttttcac ttgcagtttt  
2401 tgtgtaagca cttcttttaa ctttttcaat ctatcgtaa gacatttttt ataaactttc  
2461 tttgattttt gtttttaaaa actccattaa atttttattc tcatcaagtt ttttttgaaa  
2521 atcatcgatt aatttttttt cttttttttc tgcgtttgtg taagcgttta tcaattgtct  
2581 taaattcatt ttagaatatt tttcataatc catttttttc ctttttttga aaaaatataa  
2641 atgtaatcga gcttatgaga ttataccata ttttttaaaa acaaattata gaactttttt  
2701 agttcgata atttgcaat tatccaatca tttttataa ataaaaaat gattaataat  
2761 ttgcaccgagc tggctttgca ttaattcgca agctcattta atgaaatggt agattattca  
2821 gcaatgcact tttgtttttt cgcttatcta atcccatttc taaaagtatc aatcatttta  
2881 aaaaactgct cttgattttt tgcgttaaag tgcatatgat ttgcaaagtt taaattctca  
2941 tactcatctc tttgaagctc tactgcaata attttaaat cattaaaatc aaaatcgta  
3001 aattgcaaaa gcttgtcatt ataattaaat ctaacttgat taagtttcat attgttttaa

```

3061 atttttaaat atttttgctc atcgctcatt attttttgac tttcattttc tagcttttgc
3121 atttcgatat tttcaggttt aaaagtaaaa actatacctg aaaccttgcc gccacgcca
3181 cgtcctgcgg ttttttcttt ttcataaggca agatttttaa aaggcactcg catctgatca
3241 aaaagattgc gttctttaga aagttctttg ataacaggtt taagaatgct tttgtcaata
3301 tctctcattg caagtttttc agatataatcc ataactctac aaaattcttc ccatttaaaa
3361 taagccttgc ccgtagttct atattgcttt aataaacgat aaagtgtttt tgtatattta
3421 ccactaagag atataaattc ttcaagttca aaagctgtaa aattagttgt caattgattg
3481 actaaataag caaaatcagg attaattttt agtgttattc tgtaaataa agtgctttca
3541 tcatatccat catcaggatt tcttttaata tagtgtattt ccattgtttc aaacaaattt
3601 acatatctgt gtataacttc tgtctttggt tctatgattt gtttaaaatt tgccttgaaa
3661 aatttatatt ttaaactatt gatattctct gttaaatatt ctctagagtt agaaagtttt
3721 tcattgattt taaaatcatt ggcatataaga ttaattacat tatctatacc cttttcttta
3781 atctttgaaa agattaataa taaaaggttt tgctcttgct ctgtaaagct aggcaacttt
3841 attttattaa aatcattgtg gtatttaaca atatcgctca tttttacct tttgaagtat
3901 aaccctaaag gcaaggggct ttttcgccc tgcggttttg ctagaaaaat acttcaactt
3961 taagtttaaa aaacctaata ttttagatata atctcaciaa acgcttacta tgttgtttca
4021 tagttaagcc ttttaaagggt ttttccgcc aagagtgaa

```

//

>>BfR-CA-15842\_min\_cov\_30 putative plasmid location

```

LOCUS      BDFJFJMB_1          44520 bp    DNA        linear      12-APR-2021
DEFINITION Campylobacter species strain strain.
ACCESSION
VERSION
KEYWORDS   .
SOURCE     Campylobacter species
  ORGANISM Campylobacter species
            Unclassified.
COMMENT    Annotated using prokka 1.14.6 from
            https://github.com/tseemann/prokka.
FEATURES   Location/Qualifiers
  source   1..44520
            /organism="Campylobacter species"
            /mol_type="genomic DNA"
            /strain="strain"
  gene     970..1212
            /locus_tag="BDFJFJMB_00001"
  CDS      970..1212
            /locus_tag="BDFJFJMB_00001"
            /inference="ab initio prediction:Prodigal:002006"
            /codon_start=1
            /transl_table=11
            /product="hypothetical protein"
            /protein_id="Prokka:BDFJFJMB_00001"
            /translation="MRSEVFVLTSSPLPINFQITFKLFAKAPPAKVTRLSSYLSIFSG
            FALISKLSFLIEIGNFPLDSPATAFKSVFGVQELDI"
  gene     complement(3203..3601)
            /locus_tag="BDFJFJMB_00002"
  CDS      complement(3203..3601)
            /locus_tag="BDFJFJMB_00002"
            /inference="ab initio prediction:Prodigal:002006"
            /inference="similar to AA sequence:RefSeq:EAQ71728.1"

```

```

/codon_start=1
/transl_table=11
/product="Ssb"
/protein_id="Prokka:BDFFJJMB_00002"
/translation="MNEVVLGCGFLGKDWEISQGKKDLIAKNSLAITTVTKKLNEEIKH
TDWIPLVVFGRVLANFLKKGDKFLCKGRIFTSVYEDENQKTRTGFQVIVDSFEF
VHQREKQDMQKESEKNISAEDFEENKEEVF"
gene complement(3612..5654)
/locus_tag="BDFFJJMB_00003"
CDS complement(3612..5654)
/locus_tag="BDFFJJMB_00003"
/EC_number="5.6.2.1"
/inference="ab initio prediction:Prodigal:002006"
/inference="similar to AA sequence:RefSeq:APA82025.1"
/codon_start=1
/transl_table=11
/product="DNA topoisomerase III"
/protein_id="Prokka:BDFFJJMB_00003"
/translation="MKLFIAEKPELGRAIAEGLDGDINKYEGYIQKGDNLITWAFGHI
LKLATPEIYNEKWLWNLNDLPLDIKEFKYVPIENSKKQLSIICKLIHNDQVDSIVHC
GDADDEGQILIDEIIQYSKTQKPIFRVLINDLTPKSVRSEISKMKPNSQFKGMSERGF
ARSQADWIVGINLTRAFTSVAQKSGFKEVLT LGRVQTPILGLVTRDYEYENFKSIDY
YSLLGKFELNGKVFNARLKTEEKIIDENTAKNIKEININKTGLLNTSKEKKKEYPPLP
YSLLVLQAECAKVYGYAPDKTLEVTQILREKYKAITYNRSDCQYLPETMFEQAPNIVN
AIKSNIKNSEKDLNLLIENSDLSIKGKAFNDKNISAHYGIPTQNNFDYGLLKEEEKI
IYNLIAKRFMIQFFKPREYEVNLEIQTYDKNIFFTSQSKNISDGFRKFFNHEEKDNH
EEKDSEDANNHLDISTMENNSICKIKDIEIEKKQTKPRPYTMSDLLRDLNSVAKYVK
DEKIKLLIEKDKDKKGENGGIGTPATRSTHIKNLIEQGYVEVSKDKKQVVKSTKKGK
LLISLAPETLKYPDMTALWFEQQMIEQGTIKKEDFLKSIKEVNNEILKIKENDDMK
QFLQLSKEKQYSCPECKNGYLIRRKNAKGTYYWGCSEYKNGCKFCYDEKKPKLK"
gene complement(5665..6306)
/locus_tag="BDFFJJMB_00004"
CDS complement(5665..6306)
/locus_tag="BDFFJJMB_00004"
/inference="ab initio prediction:Prodigal:002006"
/inference="similar to AA sequence:RefSeq:ADT73517.1"
/codon_start=1
/transl_table=11
/product="Hypothetical Protein"
/protein_id="Prokka:BDFFJJMB_00004"
/translation="MKANYIELEKKEGQISDIPYTIKVEYPNLKKLQDNDLLMANDK
GQWLCGFIGLKENQKVFKELDNGYIVPQYLYLNSKDQKEIDLFSNNLEITKVLQFDL
NHSWNKTEKNTQLDEEECLKIKNITIEYINNFNKNISKQFEELSKEENIHKTNKLIIE
ELITQEEGVSGLIEKDLKEIKDKSYFFNKMSSFVKNQTIIEKSRTKEDYSINN"
gene complement(6390..7070)
/locus_tag="BDFFJJMB_00005"
CDS complement(6390..7070)
/locus_tag="BDFFJJMB_00005"
/inference="ab initio prediction:Prodigal:002006"
/inference="similar to AA sequence:RefSeq:EAQ71790.1"
/codon_start=1
/transl_table=11
/product="cpp47"
/protein_id="Prokka:BDFFJJMB_00005"

```



```

/translation="MAFIKLSNGSNPRLMVDVNNALNYKDAQTGEIKQRQVATALVDV
IEEAGKVAGMDQGAVTASFkinNEWKNYFVNRDKDSHNIVLMPDakersNRDNHVF I
NNHWNKESKRFYHAINDKREAGKALIEGIGISEFQnQDGSksfYLDTHIKLSNNEIKE
ALEKTKLEKGDGYLAIVRNGGFEIKNEVEMKEQKSKQDGSKEETIGQTQEIKEPEK
TQNQEFGR"
gene      complement(7146..8027)
          /locus_tag="BDFFJJMB_00006"
CDS      complement(7146..8027)
          /locus_tag="BDFFJJMB_00006"
          /inference="ab initio prediction:Prodigal:002006"
          /inference="similar to AA sequence:RefSeq:EAQ71821.1"
          /codon_start=1
          /transl_table=11
          /product="cpp46"
          /protein_id="Prokka:BDFFJJMB_00006"
          /translation="MMAEENQNLFDDEQINQENESNSLFDEVEIKICNYQEIIIDEQIK
ILEILNNIINIGLNNLTDENTKEGIFKDLQNFfKLKtNIKTLISYfKNPPSQEELEI
INKTLLMKKELETlnSSfLNLKIEDFAQQVtQLRALLDNfLVNFDNTLLESLNSALKt
GDDNLKDFKEKIELRLSSSLQTYDQfLKLfLEKEKKAILDFSQIFSRITKNIKRALIT
SLIFFTFFGISFGVfSYIVYLKYEDYKKITHNAQKLSSIVIKENKDKSLTlSFpKNKt
ILNKDENGihITLQGGE"
gene      complement(8027..8785)
          /locus_tag="BDFFJJMB_00007"
CDS      complement(8027..8785)
          /locus_tag="BDFFJJMB_00007"
          /inference="ab initio prediction:Prodigal:002006"
          /inference="similar to AA sequence:RefSeq:ADT73520.1"
          /codon_start=1
          /transl_table=11
          /product="YggA-like protein"
          /protein_id="Prokka:BDFFJJMB_00007"
          /translation="MKKITFATILFFGVSSSNAIKIDVLTGDtKLACEAMlCLASpV
KPPECGAALARYfSIDARKWADVIAKRrSfLNLCPVDASSDPEMYKYKNDILVHLDGE
CTIPVLNKRIESIVLRTETIRNCSHGdGCTTEIIKHYGyRINPQLTNSCRLlASSKYt
DYHLKYTCNTKfYEKKDWERGYELKEVSQEIYNALPISQKEQGEKLVpVSyAEfVRLP
VNKRKQIGfGKYRIdIAfYQKIIIKDCWINEK"
gene      complement(8782..9213)
          /locus_tag="BDFFJJMB_00008"
CDS      complement(8782..9213)
          /locus_tag="BDFFJJMB_00008"
          /inference="ab initio prediction:Prodigal:002006"
          /inference="similar to AA sequence:RefSeq:EAQ71817.1"
          /codon_start=1
          /transl_table=11
          /product="cpp44"
          /protein_id="Prokka:BDFFJJMB_00008"
          /translation="MKKTLsFLLlTSIVfTGCAVSAPKPKKLEGGSKLSLNNSLLEER
YKFVPKDSRLSNMDWIYQLELAKNKEGLLSNEQVVKtFLLAHNAKRIILIGEKNIQe
YNEyFKKNGVQAEILLQPLNIIGKNKNTVNMLFFHAKGENK"
gene      complement(9197..10993)
          /locus_tag="BDFFJJMB_00009"
CDS      complement(9197..10993)
          /locus_tag="BDFFJJMB_00009"
          /inference="ab initio prediction:Prodigal:002006"

```



CDS /locus\_tag="BDFJMB\_00012"  
 complement(13163..14056)  
 /gene="virB9"  
 /locus\_tag="BDFJMB\_00012"  
 /inference="ab initio prediction:Prodigal:002006"  
 /inference="similar to AA sequence:RefSeq:ATG66341.1"  
 /codon\_start=1  
 /transl\_table=11  
 /product="P-type conjugative transfer protein VirB9"  
 /protein\_id="Prokka:BDFJMB\_00012"  
 /translation="MKNITLISLSFFFLASTAFALNEPQKSEYDQRIAHAEYNSKDVFKMIARNGFVSVIEFGDDEIITNTATGFAEGWDLIEKKNLLFIKPKAYKTTFLVENDPYNQSQQKEMIVDPNPRDWKTNLIVTTNLKTYIFDLLLTNDSKQATYKLSFNYSKILKQESEIKKELEKKIIEELDKNIVPRNWDFLMKANKGSEDIAPNYAYDDGVFTYLGFNDTKTFPSVFLYENKEMILNTHIRKDGKYDVLVQKIAKQILLRSGDKVVGIFNNGFGKNPLDRTRETSNENIQRVNNHE"

gene complement(14053..14721)

CDS complement(14053..14721)  
 /locus\_tag="BDFJMB\_00013"  
 /inference="ab initio prediction:Prodigal:002006"  
 /inference="similar to AA sequence:RefSeq:ADT73526.1"  
 /codon\_start=1  
 /transl\_table=11  
 /product="type IV secretion system protein VirB8, putative"  
 /protein\_id="Prokka:BDFJMB\_00013"  
 /translation="MKNQNEINSNALNFEASVRYLIEKSNQRAWLVAFISMAISIISIVAVVFLTPLKTTEPYVIRVDNTTGMVDIITSLQEEQISSIEALDKYFISQYIKAREGYKFLNQDYLLTQLMSDENVANDYRAIYAGANALDQIYKDNVEVSVKILSIVLGNVSGVKTSTIRALINKKDSVTKSTQQSTKVITLSYDFLQAKTSEENRILNPLGFKVTNYRIDEEIR"

gene complement(14744..15190)

CDS complement(14744..15190)  
 /locus\_tag="BDFJMB\_00014"  
 /inference="ab initio prediction:Prodigal:002006"  
 /codon\_start=1  
 /transl\_table=11  
 /product="hypothetical protein"  
 /protein\_id="Prokka:BDFJMB\_00014"  
 /translation="MKHKLVLALFTIIFSACSTKNNTNYNYLFDDKNGWVAINNIKEQEKFLKIENNTPVFEKKETLIKENKNTKKKIIIVLNHPTMSYVILRKNVNSNSFSENKIIKASEFDYSISYTEQGDVFKVVKQLFFKEKDIQIIEVE"

gene complement(15180..16190)

CDS complement(15180..16190)  
 /locus\_tag="BDFJMB\_00015"  
 /inference="ab initio prediction:Prodigal:002006"  
 /inference="similar to AA sequence:RefSeq:ALW65300.1"  
 /codon\_start=1  
 /transl\_table=11  
 /product="conjugal transfer protein TrbL"  
 /protein\_id="Prokka:BDFJMB\_00015"

```

/translacion="MQGNFFTELGNATHAILEVVRNAALSEKMTQLAVLFSITLVVTI
MYKGYEILFGRSQSPTKEVIWDLVAKAMIITFALNIGGWLTVINAMDGFHEWAGGSL
SMYKQIDIIFNEVRNLADNIWAKASGFDTVIAGITVIIIVYIAFGIAVLPALVVINATA
FTQTILVIAAPLMFYCLLYKSTKNVFTQWLALLISNTLLVLFMSLFFKVFKEIYRFA
RYAQDQYMNADADAFFIGISMIFSSVLLVAMIFVAKVFAEKVGSVALDSAMQSVFSRV
SNPISSVAGKTLGNLFGHTQKGGSKMAEGVYSAMKSGASVAGSNTMSLGKNLLQMRN
EA"
gene      complement(16222..16776)
          /locus_tag="BDFJFJMB_00016"
CDS       complement(16222..16776)
          /locus_tag="BDFJFJMB_00016"
          /inference="ab initio prediction:Prodigal:002006"
          /inference="similar to AA sequence:RefSeq:ASI88310.1"
          /codon_start=1
          /transl_table=11
          /product="Phage antirepressor protein"
          /protein_id="Prokka:BDFJFJMB_00016"
          /translation="MSSVILFENKELGQVRTIRDKYNEPLFCLNDICKILNIKKTNSV
RDSINKEFDKGGGFWEYFPKTSGGTQKFIVINEPELYFVLMRSDPKAKPFRQWVIKE
VLPSIRKQGYASNNAPKLENYNNKYDLPDTPYKEKIVKAINIEIEQKQNSKFIELIEY
EIVEKFKNGKTQVLQKLNFKTKLI"
gene      complement(16790..17707)
          /locus_tag="BDFJFJMB_00017"
CDS       complement(16790..17707)
          /locus_tag="BDFJFJMB_00017"
          /inference="ab initio prediction:Prodigal:002006"
          /inference="similar to AA sequence:RefSeq:ADT66946.1"
          /codon_start=1
          /transl_table=11
          /product="cmgB5"
          /protein_id="Prokka:BDFJFJMB_00017"
          /translation="MFDDIKVFCKKSKIKSSVIATKIKCVNFILIKSHGYCSVLNPKT
KKQNKFLFSIISSLCIVNLAFSAGIPVVDATANSQMATQNAKEIAEWTQATRWTDTV
KHYQQQIQAYKDELLSKTGIRDSVFSMNDTKQIYLDFAEAGQNIQSFYNDVLQDPQSF
LSDKSKETFEEKFTLFDRCNASYLSEERKRICRMDMITYAAQVEHYNQASIQVNTVAKS
LEKLHQKLIESKDIKETNDINNAINVEKTKLEIIKTNLEISNMHYENQRRIRQDQAAQ
LFAESMGKEPLDYGELRKKYDKEVDALFD"
gene      complement(17752..18096)
          /locus_tag="BDFJFJMB_00018"
CDS       complement(17752..18096)
          /locus_tag="BDFJFJMB_00018"
          /inference="ab initio prediction:Prodigal:002006"
          /codon_start=1
          /transl_table=11
          /product="hypothetical protein"
          /protein_id="Prokka:BDFJFJMB_00018"
          /translation="MRLSLSKNREFRSPHEKNCVLFYYVRLKKSFISSLKKIVIVQA
TDTMVLIKSSIVFPLCVEIPFHAPTAKIRQKTRLLKKAIGYFNTVTQFLSNDKDTT
ELDPNIVVKIVA"
gene      complement(18093..20867)
          /locus_tag="BDFJFJMB_00019"
CDS       complement(18093..20867)
          /locus_tag="BDFJFJMB_00019"
          /inference="ab initio prediction:Prodigal:002006"

```

```

/inference="similar to AA sequence:RefSeq:EAQ71805.1"
/codon_start=1
/transl_table=11
/product="cmgB3/4"
/protein_id="Prokka:BDFFJJMB_00019"
/translation="MNNYFDPIFKGLTRPALLFGVPLMPFLINILGFILISVYTQQFF
LLIFGVISHFIMKAMTKKDEQMFRLFFLKIKFISNFLSKKYHKAKTFNSSTYKRLPTN
NDFPKLSIFPIHTEPSLEKLIPIYSSLITDSIVITKEHMLISTFFIEGIEFECESDENL
TFKKNLLNMMIMSFSNPVSFYFHNVRFKLHEFLDSYFENPFLKEIDEKYHKSFDKKS
FQQNSLYLTLIYKPLKSNIDLKTFNKLNYKSKAKEISNFVIKFQEYLGKFEANIKDFK
PKILSVYKKNIRYSEQLFYNYLISGKFNPPIAVCDSPYIYQYLTGSLKNIQFNHDMIQ
LNYNDDTKRFARCIEIKDYSNQTFSGILDRLMYLNTDYIITQTFVPLSKFDSKALNK
QINQLISSEDDGVSQIEQLNLALDDLTSNVISFGNYHFNICVFGDSIDECKQSTNKII
TSLNSLGFSTLANIALPASYFSQFPSNFAIRPRVHMISSLNFSSLVALHNFIMGKKE
KNCWGNVAVTILKTPNKQPYFLNFHKSNGRNKDEFGDLNLANTLILGQSGGGKTVFMSF
IIDQMIKYANKDSFPANTPEDKKKFTAVFLDKDKGALGNILCAGGRYISINNGKPTGF
NPFMVENNEENLRFKQLIKLCVTRNGEILNTKEEKQINEAVNTLMFQFDINERKYP
SLLLLENITDDFNDNNSLKSRLSLFQRGKQFGWVFDNEYDNLDFPDDINLFGIDGTEFL
DEKDVSALISYFILWRVMNLADGRRLCIDIDEAWKWEENDIVAEVKNKFKTKIRKQNG
FLRLATQSIEDFLKLIANTLVEQSATKIFLENPLAKEDEYKLGSLKDEFLLVKNFA
PHKRQFLVKRQDEAVVCSLDLSSLGKENLILSTGTSYIEKIESIFNQENKTLEEKIN
ELKTFYKEEQ"
gene      complement(20871..21131)
          /locus_tag="BDFFJJMB_00020"
CDS      complement(20871..21131)
          /locus_tag="BDFFJJMB_00020"
          /inference="ab initio prediction:Prodigal:002006"
          /inference="similar to AA sequence:RefSeq:ADT73535.1"
          /codon_start=1
          /transl_table=11
          /product="TraC protein"
          /protein_id="Prokka:BDFFJJMB_00020"
          /translation="MFKQIFLMALAVNLAFAVGGIDKVNTLAQDIEAALFGVSVIAIT
IAFGIAGYRMAILKQWTEVLPVVIGGIVIGAASSLATLLVG"
gene      21417..21896
          /locus_tag="BDFFJJMB_00021"
CDS      21417..21896
          /locus_tag="BDFFJJMB_00021"
          /inference="ab initio prediction:Prodigal:002006"
          /inference="similar to AA sequence:RefSeq:EAQ71736.1"
          /note="conserved hypothetical protein"
          /codon_start=1
          /transl_table=11
          /product="hypothetical protein"
          /protein_id="Prokka:BDFFJJMB_00021"
          /translation="MLDYEFQTMSEEYFKKYNVIGIRFLFGCDINQKDEIEMISLRV
VLPKQYFQYKNIDIFKAMDLFKETLLFKELTEQSIKIDFEKREFVMPDFFIKHDIEI
IPYFTQGGKEEELSKEKFFELLKQNKMKELNYLCFLFFGLFCEEEYKYFCKVKELK"
gene      21893..22339
          /locus_tag="BDFFJJMB_00022"
CDS      21893..22339
          /locus_tag="BDFFJJMB_00022"
          /inference="ab initio prediction:Prodigal:002006"
          /inference="similar to AA sequence:RefSeq:ADC29285.1"

```

```

/note="conserved hypothetical phage protein"
/codon_start=1
/transl_table=11
/product="hypothetical protein"
/protein_id="Prokka:BDFFJJMB_00022"
/translation="MKLSEFDFRVWDKDEKCFDPYTKSRAVVKNLPNKLLNLEIEL
FTGIKDKNGKKIFEGDILLYKKNKKKYIFKIFDGLSHFKEFLFLKYSFDKESQTIIQS
PYSQIELSHKLDCCNFHNKANEIYFEVIGNIHENEIILKNTELLK"
gene 22336..22773
/locus_tag="BDFFJJMB_00023"
CDS 22336..22773
/locus_tag="BDFFJJMB_00023"
/inference="ab initio prediction:Prodigal:002006"
/codon_start=1
/transl_table=11
/product="hypothetical protein"
/protein_id="Prokka:BDFFJJMB_00023"
/translation="MKDEIINIIEKAMGENYKKVLWIFQEHIKNLINCYPSENGLVF
EYKSRISNDVISIIMFEKTGQKINISLFFENTRKKEKILELNPEEKNSEELILKALF
IKNKKVLLSDFILDKVSMMYTRNKMFKFQKLMIDNKEKGIV"
gene 22782..22940
/locus_tag="BDFFJJMB_00024"
CDS 22782..22940
/locus_tag="BDFFJJMB_00024"
/inference="ab initio prediction:Prodigal:002006"
/inference="similar to AA sequence:RefSeq:EAQ71797.1"
/note="conserved domain protein"
/codon_start=1
/transl_table=11
/product="hypothetical protein"
/protein_id="Prokka:BDFFJJMB_00024"
/translation="MYPYLFNDKIKNHSMILCTEIECKKCGEKIYVEFQANEKFIFKC
PNCSSSEKK"
gene 22952..23260
/locus_tag="BDFFJJMB_00025"
CDS 22952..23260
/locus_tag="BDFFJJMB_00025"
/inference="ab initio prediction:Prodigal:002006"
/inference="similar to AA sequence:RefSeq:ADT73510.1"
/codon_start=1
/transl_table=11
/product="Hypothetical Protein"
/protein_id="Prokka:BDFFJJMB_00025"
/translation="MRSSLEKVIKNYSENF SNKRDNDF AQGLIKYLYENAIIGKNDKF
FLEKNCQYIRIINEKEKRLINVFCEKPIIDFFQNAEYKELKYYGINEKDFIELAKE
"
gene 23264..23638
/locus_tag="BDFFJJMB_00026"
CDS 23264..23638
/locus_tag="BDFFJJMB_00026"
/inference="ab initio prediction:Prodigal:002006"
/inference="similar to AA sequence:RefSeq:EAQ71782.1"
/codon_start=1
/transl_table=11

```

```

/product="cpp8"
/protein_id="Prokka:BDFFJJMB_00026"
/translation="MIEKNLTKKEMFSYAIFIAIIALICIFKNEIWEFVKFIFSNLDF
IVGEDNIVFFPITLLIVFTIAICAVWGLSNVLALSFLMFIPIFVAVFYIFNINISLEN
LYGSYFIFLIIINGILWSVNQR"
gene 23635..24147
/locus_tag="BDFFJJMB_00027"
CDS 23635..24147
/locus_tag="BDFFJJMB_00027"
/inference="ab initio prediction:Prodigal:002006"
/inference="similar to AA sequence:RefSeq:ADT73509.1"
/codon_start=1
/transl_table=11
/product="cpp9"
/protein_id="Prokka:BDFFJJMB_00027"
/translation="MKKITIVAYAIYFLSGLWFLFSAFKEHFDILSFILGIVFIYFGV
INTKRILNDSNENKTELETLFATANIIFVSISSIFLLMLITFFAFQNEINIKFFSDQG
LVLKDDKKISYFKEKEIKSFDENKYGFVMAVYGDKHIEVVLQNKENDTFFELRCNEE
GCKEVLKENK"
gene 24144..24701
/locus_tag="BDFFJJMB_00028"
CDS 24144..24701
/locus_tag="BDFFJJMB_00028"
/inference="ab initio prediction:Prodigal:002006"
/inference="similar to AA sequence:RefSeq:EAQ71826.1"
/codon_start=1
/transl_table=11
/product="cpp10"
/protein_id="Prokka:BDFFJJMB_00028"
/translation="MRVVNLSKKFVDKILFLRINHVVNIFMLLILALFSTIAIAVFLYH
FIEEENYYAYFVSSFFVNGFLLTIHLIGEKKCAKEVYYDDNFISKLNNSLRKELEDD
LLKLQEYDGINVLEYKTFALLKCSSYEEKGRIDEELIDKIKKYYINLFKKKIAKELE
EMQKEKERSNILKTNQELILKKIGE"
gene 25217..25888
/locus_tag="BDFFJJMB_00029"
CDS 25217..25888
/locus_tag="BDFFJJMB_00029"
/inference="ab initio prediction:Prodigal:002006"
/inference="similar to AA sequence:RefSeq:EAQ71730.1"
/codon_start=1
/transl_table=11
/product="para protein"
/protein_id="Prokka:BDFFJJMB_00029"
/translation="MIISICNEKGGSGKSTLAVNLAIKAAAENKKVLLCSDPQKSVM
TFANIRLEEGINRTFSIVSKVGESLKEFIQKEKKNNEYDLIIIDTGGRDSKEMRIALG
FSDVVIPTIPSQFDVSVLDKMFTIIKMAKELNKELQTFVLINKSSPNPFLNKKIEDL
RNYIKEQENEDIKLLDNIICEREKYKTCIQMGLGISETETNSNKALEEFNTFYNELKN
KIKGL"
gene 25890..26111
/locus_tag="BDFFJJMB_00030"
CDS 25890..26111
/locus_tag="BDFFJJMB_00030"
/inference="ab initio prediction:Prodigal:002006"
/codon_start=1

```

```
/transl_table=11
/product="hypothetical protein"
/protein_id="Prokka:BDFFJJMB_00030"
/translation="MSFKKNTNVDLNSFIDGATGETSKQRVSGRTNKRDKKLLVGFTN
EEYERLSSMAEQMGMDKGAFIRFKIFNNY"
gene 26219..26821
/locus_tag="BDFFJJMB_00031"
CDS 26219..26821
/locus_tag="BDFFJJMB_00031"
/inference="ab initio prediction:Prodigal:002006"
/inference="similar to AA sequence:RefSeq:EAQ71825.1"
/codon_start=1
/transl_table=11
/product="cpp27"
/protein_id="Prokka:BDFFJJMB_00031"
/translation="MVIAYIRISTAKQDSEVQKLQIYEYCIKNKINIDEVMEVEMSSR
KSLEKRRMNELKDKLNEGDLLICTELSRLEGRSMLLEVITLILELSEKGIQFAFLRQPEL
SSFNNPSQKLLLSFYAYVSETERDFISQRTKAGLANARKNGKNIGRPVNSFNSMYDKD
TDLIKELISKITLRNIWKFLGEKGTYNMFHYFCKSRKLA"
gene 27023..32803
/locus_tag="BDFFJJMB_00032"
CDS 27023..32803
/locus_tag="BDFFJJMB_00032"
/inference="ab initio prediction:Prodigal:002006"
/inference="similar to AA sequence:RefSeq:APB40411.1"
/codon_start=1
/transl_table=11
/product="helicase"
/protein_id="Prokka:BDFFJJMB_00032"
/translation="MAKKKKLNDQPSLFYFIEEELIITSERNGNEQQNGKLSEYGNI
TKEFKQTSISSNTPSVDRQENSTIQLDNTREMGRVLSEHNQESRNVRSNDTISIATNTN
GISNLGEQRSRQEERTGVNRYGDSRRANKSQSIHSDRTPNLFISIRNDDERQGTDA
ARSYNQSVLETAARNDGYERRSLKSGQKLDVSDDEIYLGSLKDRFQKNLQAIKLSK
TIEQENRYATKQEIEILNKFSGWGGIPQAFDHQNKWEKEFKELISTLDYAEYEKAKT
STLDAFYTPKIIIDTIYQGLNQLGFNDDHTKEIFEPSAGIGSFLSYAKNYSKYHFT
CVELDTISANILKHLHPNQTIYNKAFQHHLFDKPYDAFIGNPPFGQKILDLNDPTLN
KTSVHNYFIGNAIKLNKEDGIAAFVSSYFLDSKNSTIRNFIAEQATFLGAVRLPNNA
FKKRANTEVTTDIIFFKKGKDLNIDKSWLESVEYYDRFDEAEKRDMPDVFNDFRIN
EYFKNNPQNILGKMNIKSSQYGYSLLECLDDGRDLKIALENFTKTLPKNIYKYQETKIK
LSYYRIDRESPEYKYSKTLKLDGNYFEYNNEIYMKIRSDDELVFSKPVVNEHDTR
RIKLIALRDQFNTLIEYEKNESSDLLVENQRKYLKLYDEFVAKEGYLNRDANKKAF
REDVEANKILALEKNYSSGISKSVALKEGIDPIAPSATKADIFFKRTINAQKEIKIST
PKEALIASINEYGRIDLKFLETNLNQPLEETLKSLEQDRILFKDHKNPANYVLAKEYL
SGNVKAKHKEVKKLVEDGFNEFANNLESLEQVLPKDLKAVDISISLGTTWIPIKYYKQ
FIEETLQITPKDYDLFLMERTGEWSLKGFGYSLSSYIRSEYATERIGCFDLEHGLLR
KPIRIYDKKLDPSGKEIRELNPKETAIANSKLENLKNFIEWIYKDYDRRTDLENIYN
ERFNTNIEPRYNGEHLELPNFNANIKLKKHQKNAIYRAIQENSIIFDHQVGGAGKTLVA
ICSVMEQKRMGLLNKPLIVVPNHLTRQWNDEFYHAYTNANILVATNDDLKKNREKFF
SKIATNFDIAIMTHSQFKLIPAPYEVMMKKQYEEDINILEQTLEKKQNDNVMRYSVK
DLEKRIENFKVKLSLQTTTHKSKAIDFSELGIDALIVDEAHEFKNLLITTSMDISG
LGNLKGSKAYDLYSKTYIHEQNKKLYFLTGTPISNSITELFTLQRYIQPNVLKEKG
IQAFDSWASTFGEVTNAWELDSSGINYKIVARFNKFKNPVELSTMYKSVADIVTNNDI
MKYQKDFVPKLYNDKPINIVAPRSEEIAEFIGIQDENGWRNEGSIVWRMEHQDDITR
NNLLACTDARKAGLDFRLINPHCDDYANSKINKLIENVFNEYNAWDDKGTQLIFCD
```



```

LSTPKQHSQKVSLSNSNIATPNLNKEEFVNINEAIEQTEEENSKSLDELLEAEQAKFDVY
TDILKKLVAKGIPQNEIRFIHDAKTDLQKGQLFADMNSGKARILIGSTQKMGAGTNVQ
KRIVALHHLDCPWRPSDLEQRSGRVIRQGNELFMRDPQNFVRVKEFRYATERTYDARMW
QVIESKARSIEQFRKAGADVRLTLEDVTSGAADAAEMKAEATGNPLILLQVQLNSDLRQ
EEMLYSGYKRQIHNNESLITNLSKIELLKKDIAKMEILNSIIKENNSEHFQGGKYIN
DDEKDFIVFKNDTSDLNKSQAELERNFEKIVKTIADDYQKEYKVFLEFKLLISGERT
DLNTLNFYVSTTDGKTIMEPENLIYKRDEKTFKLESYVNFVGGFVKRLNNFYNDLEKF
TQLNKNKIENLEKEIVELKSITGDNTPKYKRKDYLEALREDNRIIMDEIEKMSKQKNY
KSDFVPKSAKILEDLNKHNEIEVLSR"
gene      complement(32864..33715)
          /locus_tag="BDFFJJMB_00033"
CDS       complement(32864..33715)
          /locus_tag="BDFFJJMB_00033"
          /inference="ab initio prediction:Prodigal:002006"
          /codon_start=1
          /transl_table=11
          /product="hypothetical protein"
          /protein_id="Prokka:BDFFJJMB_00033"
          /translation="MEMLEKITYQDKENLLILNINLDLLEDLSLYKKKNTINDKFDLI
FKQPKQFNDEYIKSHYLSIYRAIESVNINRYFVWEIASGMPQKIITQTIIYDMARFY
NTIKHKEKLIDESLQYIVKEINNIIGSIQGLGDYIAPQESFCNSFGFSQLYTPFHTSL
IGKAFLIRMALEKKIKWMIFGDLQEHLINLHEVLNKLKENHRQYFDLPSNVDFDKIML
VKNWCNRIIHNGFFPYIWVWDAIEIIEPLFCISDKKGRIVLEGFNRYRKDITQDISKF
FLEDEKR"
gene      complement(33785..35098)
          /locus_tag="BDFFJJMB_00034"
CDS       complement(33785..35098)
          /locus_tag="BDFFJJMB_00034"
          /inference="ab initio prediction:Prodigal:002006"
          /inference="similar to AA sequence:RefSeq:EAQ71823.1"
          /codon_start=1
          /transl_table=11
          /product="cpp17"
          /protein_id="Prokka:BDFFJJMB_00034"
          /translation="MSRLKIFDDEIIAKRVYTKIEIGSKSTYNFKNRSSNKTNRILKK
NTEVVVKITSGSKNLQAVCKHLDYISREGTVDVITSDFDTLKGKDELKFLKKIYENEG
APIPRFGQEKKEKRHTINMVFVSMQDYTNAPPEKMKKAVLMTLKKMYPDNFFAIAFHND
TDNPHCHVCLKVADKNGKRINPKKTDLMNLRSLFAKALNELGVEAKATIRSKNNEVSY
KLEKNKEQTKMHYYQVLDYGDYKFKSLDKNAEDSFYVKYRTRKKGIIATISKDLARVI
KENKILKGEYAKFKIVGQETYQIKKKVKVNGKIVEVTKMAKKSVDASVLGREKELKL
LQSDAANNPKYTIKENNERDYTKYRQRILQELSNKSTIRRDAAQERDSMRILSEQSM
VHDQKGTQMPMHINALNQLQQGKRGRTDSSLRWTSARNNEIERDG"
gene      complement(35098..35628)
          /locus_tag="BDFFJJMB_00035"
CDS       complement(35098..35628)
          /locus_tag="BDFFJJMB_00035"
          /inference="ab initio prediction:Prodigal:002006"
          /inference="similar to AA sequence:RefSeq:ASI88230.1"
          /codon_start=1
          /transl_table=11
          /product="copG family domain Ribbon-helix-helix protein"
          /protein_id="Prokka:BDFFJJMB_00035"
          /translation="MKKTVIYFDEKNYSFLVGLKKEMKTSFSKIINTILKNISNDEKE
NINNFDKINHKKNEPTKEIRFKL TEEYKIFSDFAKSNNGTATKQIRILTLNHIYND

```

KFFDKKYINEFILTRTEINTIGRNIYQLLKILRSGKSVRINENNLEKSFKDISLNIEK  
 LSKELEKIIKNNERI"

gene 35832..36113  
 /locus\_tag="BDFFJJMB\_00036"

CDS 35832..36113  
 /locus\_tag="BDFFJJMB\_00036"  
 /inference="ab initio prediction:Prodigal:002006"  
 /codon\_start=1  
 /transl\_table=11  
 /product="hypothetical protein"  
 /protein\_id="Prokka:BDFFJJMB\_00036"  
 /translation="MKKESKEIELLKQEYKEKIQKAKQKEKDKKEKLCCKKLGSEIIYL  
 LDNDDFRNLFFDYIQKNLEKIKSLCSDIDDFNINYIKNKEDENDQDK"

gene 36174..36875  
 /locus\_tag="BDFFJJMB\_00037"

CDS 36174..36875  
 /locus\_tag="BDFFJJMB\_00037"  
 /inference="ab initio prediction:Prodigal:002006"  
 /inference="similar to AA sequence:RefSeq:EAQ71803.1"  
 /codon\_start=1  
 /transl\_table=11  
 /product="cpp20"  
 /protein\_id="Prokka:BDFFJJMB\_00037"  
 /translation="MENKEMQENITFDNIKVRITDNSKLCKEYQECVFNQTYDNTSNP  
 KEIESLFNTLKTFDSCCLKQIENLSFSKQEIIDEITDDFKIPLKVRLGEGHFEKGL  
 DELIKLGSKNIDTNINKKINPDIKEKFDKILSPLKPFNFQNILNGTFEVIKEAGSLTN  
 TNEISSFIQEFKAYKKTQKLENNKTIDNPKEDKKKDKNYFLKKVDEFFQKKLDSRE  
 REHVRTNEKSFSKSI"

gene 36893..37957  
 /locus\_tag="BDFFJJMB\_00038"

CDS 36893..37957  
 /locus\_tag="BDFFJJMB\_00038"  
 /inference="ab initio prediction:Prodigal:002006"  
 /inference="similar to AA sequence:RefSeq:EAQ71815.1"  
 /codon\_start=1  
 /transl\_table=11  
 /product="cpp22"  
 /protein\_id="Prokka:BDFFJJMB\_00038"  
 /translation="MYSLNIPSAIQSFKQALEEEGLIIDGSPIMDGKIHVRKTTNDKG  
 RELSGAYIGYLNNNFPAGFVQNFKTGIKKNWKMQIEKNQSNNIKSPKELHEQIKKDQE  
 LREKEILALQEKTALKLEDEYNNARWANSNHAYLKKKGFDEFYLKQDNKGSLLIPLK  
 DENGKLWSVQRIFPNGDKIIGVIKTQEEKDQGVYLAKKQGCFFHIGAKTLHNLKEFY  
 ICEGFATGATLYKALNKPIIMAVDAGNLENVVKKLSTLYSDRNITIFADNDLKKELKG  
 LENTGKKTALIEKYSNVSVILPNFTQEQQSSQGMDFNDLMSLKGLEFVAKEIKMQM  
 FREKVVCLKKENSDELTRG"

gene complement(38025..39230)  
 /locus\_tag="BDFFJJMB\_00039"

CDS complement(38025..39230)  
 /locus\_tag="BDFFJJMB\_00039"  
 /inference="ab initio prediction:Prodigal:002006"  
 /codon\_start=1  
 /transl\_table=11  
 /product="hypothetical protein"  
 /protein\_id="Prokka:BDFFJJMB\_00039"

```

/translacion="MSKDKNEKLEELQEEINKVKELYEQLKSDYSINKAFIDSSSSDDS
LKSLINNEINSYQEVEREIQERIYKLNAYNYLLNNDQSGKSRLTRIQEVTSDNIIND
IKQKINNINNSYAEIFLSDKGNIPGDLNKNYEQIKNIYNDLIVVKNSENLNKVEDLNR
KIDDFLSKYSEIIGNEENSKYKTFISNYTDFEKKKRELDFFYKIVFGSDGNIQSLKK
ELEERKEQLKKVEVEAKKVIDLSSDAGLAAGFFKQVEQANDNKNKNLYFFAGAILCMA
IFNFFTIDWKNLNNIDLVSIVRLMINTPFIWAATVANINLNKYIKLEQEYAHKESLA
KSFERYKDQIKDLSANYETDEKQVELMTKLLDTNIEAFKKNPSDNIEKIRSNNIFTEM
LARKNKNDG"
gene      complement(39243..39446)
          /locus_tag="BDFFJJMB_00040"
CDS      complement(39243..39446)
          /locus_tag="BDFFJJMB_00040"
          /inference="ab initio prediction:Prodigal:002006"
          /codon_start=1
          /transl_table=11
          /product="hypothetical protein"
          /protein_id="Prokka:BDFFJJMB_00040"
          /translation="MLELKSILKYCKENRDSMLKDKTSKEYVGCENAFKADMSRSMWK
ELLDYGELMKQAEKAKASGLFD"
gene      39982..40854
          /locus_tag="BDFFJJMB_00041"
CDS      39982..40854
          /locus_tag="BDFFJJMB_00041"
          /inference="ab initio prediction:Prodigal:002006"
          /inference="similar to AA sequence:RefSeq:CKG86570.1"
          /codon_start=1
          /transl_table=11
          /product="hypothetical protein"
          /protein_id="Prokka:BDFFJJMB_00041"
          /translation="MAKIVNLENRDTKKLYSSVQEKIDATTGEVTTVISSFLQREKTK
DDFIKLFVENISFLTDNLSNPALRVVLMVMKLNLYQNVFNYNSDFVHYFESKKILGKS
SVYRAIKELEDKQVIFKVTEEQRKEYDIIGSNSYIMNPQIIGKGSFKDLKCLRQTVVK
TFDFDNLEFKQEISVESEYEGFEQVKKNPDNYVIEEVKQIASNKNTIENQVIISEKDN
DQDYPKEEIIDVKVDDNKKEEQPALFVENKNEQNAKAFINEFAGMFNGAFHPSKTVKEM
KKESLENDLKEGNI"
gene      40851..41264
          /locus_tag="BDFFJJMB_00042"
CDS      40851..41264
          /locus_tag="BDFFJJMB_00042"
          /inference="ab initio prediction:Prodigal:002006"
          /inference="similar to AA sequence:RefSeq:CKG86535.1"
          /codon_start=1
          /transl_table=11
          /product="PIN domain protein"
          /protein_id="Prokka:BDFFJJMB_00042"
          /translation="MKKVFLDTNIFIDFFDEARVNNEQAKQLIYFLISNEIKIVFSED
MISTIAYLIDKNKLPALMSFFKSTITNPYFEIVSFGSSVINMACDFHLQNKGFEDYL
QYFCAEKENCCAIYTMKDNFNLKIPIKRYGDTNI"
gene      41289..42497
          /locus_tag="BDFFJJMB_00043"
CDS      41289..42497
          /locus_tag="BDFFJJMB_00043"
          /inference="ab initio prediction:Prodigal:002006"
          /inference="similar to AA sequence:RefSeq:EAQ71815.1"

```

```

/codon_start=1
/transl_table=11
/product="cpp22"
/protein_id="Prokka:BDFFJJMB_00043"
/translation="MFLFVPYQDIHEAKKLGAMWDNKQKQWFAPKSLDINIFKKWLDN
NKSNSYSINIPSAIQSFQALEEEGLIIDGSPIMDGKIHVRKTTNDKGRELSGAYIGY
LNNFPAGFVQNFKTGIKKNWKMQIEKNQSNNIKSPKELHEQIKKDQELREKEILALQ
EKTALKLEDEYNNARWANSNHAYLKKKGFDEFYKQDNKGSLLIPLKDENGKLSVQ
RIFPNGDKIIGVIKTQEEKDQGV EYLAKKQGC FHIIIGAKTLHNLKEFYICEGFATGAT
LYKALNKPIIMAVDAGNLENVVKKLSTLYSDRNITIFADNDLKKELKGLENTGKKTAL
EIKEKYSNVSVILPNFTQEQQSSQGM SDFNDLMSLKGLEFVAKEIKMQMFREKVVCLCK
ENSDKELTRG"
gene complement(42563..42865)
/locus_tag="BDFFJJMB_00044"
CDS complement(42563..42865)
/locus_tag="BDFFJJMB_00044"
/inference="ab initio prediction:Prodigal:002006"
/codon_start=1
/transl_table=11
/product="hypothetical protein"
/protein_id="Prokka:BDFFJJMB_00044"
/translation="MKKITLGLASFSLIVFLGACSSPEPKSMEYFKEAKNEKELKDTLK
YCKENKDSIFKDTTSKEYQECKNAFRADMSKSMGKEPLDYGELRKKYDKEVDALFD"
gene complement(42965..43606)
/locus_tag="BDFFJJMB_00045"
CDS complement(42965..43606)
/locus_tag="BDFFJJMB_00045"
/inference="ab initio prediction:Prodigal:002006"
/codon_start=1
/transl_table=11
/product="hypothetical protein"
/protein_id="Prokka:BDFFJJMB_00045"
/translation="MNIKLNIPYSEKDKLKEYGIKWNQEHTWYLQDYKNLNYITNYL
ENENFTFYVTETLNIVQGFINCWKCSKIIPVYALGSSKFIYKEKGEWFFQPKFKIFRN
ITAYSEDFTSILKRMNKSLEKSFSNTVGS SYLMNKCQYQSKQGEFFLFEELNSIFS
PNSIKEAQQKLIYDFLLFDLGFTEIIEILTSECS DINALIWFAERIKI IK"
gene complement(43816..44457)
/locus_tag="BDFFJJMB_00046"
/EC_number="3.1.22.-"
CDS complement(43816..44457)
/locus_tag="BDFFJJMB_00046"
/inference="ab initio prediction:Prodigal:002006"
/inference="similar to AA sequence:UniProtKB:P0ADI0"
/codon_start=1
/transl_table=11
/product="Serine recombinase PinR"
/protein_id="Prokka:BDFFJJMB_00046"
/db_xref="COG:COG1961"
/translation="MIFAYIRVSTDKQNTENQRFEILQWSKRNEIKIN YFVQEVISGK
IAIDHRNLGRLFKKLKNGDSLVT ELSRLGRSLLDIMEKLNWC IKNNITIYSIKENFI
LNDNINTKVIAFAFSLSAEIERQLISQRTKEALARKKMEGVVLRPKGKKNRIEVNPC
YPALKQILKWDKQGYSHSKIAKRIGVHRD TLRKFLITMGYAHLLKRYKPFQFN"

```

ORIGIN

1 ggtgattttc cttgtccatt taagtaagcc tttccttcgt tgtcaaaagt tgcacttttt  
 61 gaaactattg ttccgtcccc acttaaagtc cattccacac ttgcatttgg ctttccacca  
 121 cgagcagtca ctttaaaagt ttcataacca acaagctcag ttttatcgct ttgaatcgat  
 181 aatgtatatt gatgaagcct aacaatgtct ttaacttcta ttttatttgc cacactttga  
 241 ttatataaag ccgagatctc taaattttta atattataat cattaatcgc ttcaaaagtt  
 301 acttgacttt cccctttttc atttgagggtg ctttgctgac tgctgttaat ttttaatttc  
 361 tttccgctat ctgctgtctt tgctgtccac tctactgtag tatttggcat taagcctgta  
 421 agtttaacca caaattcgct ctcataatca attgttccat tttcaaagg agcatttgta  
 481 atcggatgat tgtgctgttg caaaatcatt gtggctttat aatttttaac ttctaattct  
 541 ttactttttt cgctcacatg atcatcattt acatttttag caaaaatttt aactttgccg  
 601 tcgttttcta aacctataat ttttaacttga ctttcccctt tttcatcagc gataagctgt  
 661 aattcattta cagtagagct attaccattt tcatcttcta aaaggaataa tgccttatct  
 721 tctccttcta atctccattt aacattagtt ttgtttgggc gtaaattttt ataagttgcg  
 781 atcgcaattt ctttatttcc tattacttcc ttgtcaatac tcaaactggt atcatcatta  
 841 ccaaataatca aaacttgcac aggtgctttg aactctactc cattaacact agcaataatt  
 901 tcaacttctt ctttatcttt catgcttggg tctgcttgat atctaattgt agattcgccg  
 961 ttttcatcag tgagatccga agtatttgtt ttaacaagct cccctttgcc tatcaatttc  
 1021 caaattactt ttaaattatt cgctaaagct ccacctgcta aagtaacaag gctttcttca  
 1081 tatctttcta ttttttcagg atttgcatta atttcaaac taagcttttt gattgaaata  
 1141 ggggaattttc cgcttgattc tcctgctacg gcattttaat cagtgtttgg agtgcaagaa  
 1201 ctagatattt gaatataaac ctttccgcta ttgtctgtga tataatcaaa accattttca  
 1261 aacaatacgc aagaatgtgt cggagttaca cgcataggtg ttttttaac aacttcatca  
 1321 aatccatttt ttaacaatat gcaatgttta tcgttgccca aatctccaca ataagaaata  
 1381 tgatatttgt ttggagttgc tctatattca agcaccatag aatagtcctt gtcaataaat  
 1441 tgagttctac ttccttcaat tgtattttcg attcctgcta attttggtt aaatgctaac  
 1501 ttcattgctt tttcatcaag tggaaatatta atattcgcag tgattgaagt attctttttt  
 1561 gaactttcag cactcctgct atgacttaaa gtgaaagtta gtgcaggaaa aggggaataa  
 1621 gaaatcccc cttcataaat gaaaggattt ctttctaaat cttcgacatt gcttgatcca  
 1681 aaaacaccta ctttttctcc ataccattgt tgcatttttg caaagactga aacatttaca  
 1741 agcgaaggaa aagcatattt tatctttgca tccaaccac tagcaggacg ctcttgaaca  
 1801 taatctttat caaaatcata actatctatc caattgctta gtctatgata aacatttgca  
 1861 ttaaaggcaa gcgtatctat cattgcttct gcaccaactg acattctttt atgctctcta  
 1921 ctaaaatcgt gatcgtagac tagattttaat ccgaacatca ttttctga atcatttgtt  
 1981 gtcactgcat ttggataata tctcataccg cctccaaagt gtcctatagt tctatcatta  
 2041 gaaaattccc ctataccgct ttgaataaaa taagatactt taggatcact ttggtttaag  
 2101 ataggaaaaa gtgcttttagc atttccgcta aatccgcttc tttcattata attaaatgaa  
 2161 aaatctgcat taacagaagt gtttaaagag tcaatatagt ttctaactaa ctcaattgct  
 2221 ttagaattta aataagagct tgccatattt tttataattt cttttctact ctactatcc  
 2281 tcgctactat aaattgctcc tgcggtttga agtgttttca ttatgttatt tgaaagctct  
 2341 tgatcttctt tgcttaaat attatcatta tttttacttt tttttatcgt ttcttgtgga  
 2401 cttaaatttt tattatcgta atttgcactt atgaaattat ttgaataggt attatctaaa  
 2461 ggcttttcgg ttatttttgc ttctttaatt gtattttctt ctttaatttc ttttactaca  
 2521 tcttgctttt gttcttgctc ttgcaaagct atttgttgat ttgcattttc ttcttcatct  
 2581 tttgcttcat catcaaactc aagccatttt gcagatatat attcattttt atttgttaat  
 2641 ttagcccatt tcgtgcctgt atcatttgtt ataatgtctt caatatataa aattctattt  
 2701 tctctataaa tttctacttg cttactttta acattcgggt cttctcttga aattatacga  
 2761 tatgctttta cttttgcttt taaaattgtt tgttgatttg ttttttttaa ttccttacca  
 2821 aaattatttt tttcatactc aatttgttga taatcacgct ttctttcaac tgattgttct  
 2881 ttttttaaaa ttaaatacatt tttcagttct gatttatcca catttattcg cttgttagtt  
 2941 tgtgtttgct gcggtttaat agcaatttct tgattatttg agggcaaatt tgaacatca  
 3001 ggtaaagaaa taattttttg acttaaatta tcgatctcac tgtctatatt ctcaaaaata  
 3061 aactagaggt gtgtttgggt tactaaagat gaacttagca aaaaagacaa taagattttt  
 3121 cttaaatttt ttatttttgg acgctttgtt tttaaagctt ttctatataa tattgatttc

3181 attttacct ctctaacttt tcttaaaata cttcttcttt attctcttca aaatcttcag  
3241 cagaaatatt tttttcactt tctttttgca tatcttgctt ttctctttga tgaacaaatt  
3301 caaaactatc aactattact tgaaaacctg ttcttgtttt ttggttctca tcctcataaa  
3361 cagaagtaaa aattcttcct ttgcacaaaa atttatctcc tttttttaa aaattcgcca  
3421 aagcatttac acgatttgat ccaaaaaaca cgagaggaat ccaatctgta tgttttattt  
3481 cttcatttaa tttcttagtg acagttgtaa tcgctaagct attttttgca attaaatctt  
3541 tttttccctg cgatatttcc caatccttac caagaaaacc acataacaca acttcattca  
3601 tatttatctc cttattttta tttcggtttt ttcttttcat cataacaaat aaacttgcag  
3661 ccatttttgt attcactgca cccccaccaa taagttcctt ttgcattttt tcttcttatt  
3721 aaataacat ttttacattc agggcagcta tattgcttct ctttagataa ctgcaaaaat  
3781 tgcttcatgt catcattttc ttttattttt aaaatttcat tatttacctc ctttgctatg  
3841 ctttttaaaa aatcttcttt ttttattgtg ctttgctcaa tcattttttg ctgttcaaac  
3901 cataaagcag tcatatcagg atatttaaga gtttcagggtg ctaaagatat taaaagtttt  
3961 ctttttttgg tagacttaac aacttgcttt ttatctttgc taacttcgac atacccttgt  
4021 tcaattaaat ttttaatatg agttgatcta gttgcagggtg ttccaatgcc tccattctcg  
4081 ctttttttat ctttatcttt ttcaattaa aattttttta ttttttcatc tttcacatat  
4141 ttagcaacac tatttaaact ccttaacaac gaatccattg tataataagg acgcggtttt  
4201 gtttgctttt tctctatttc aatatcttta atcttgcaaa tactgttatt ttccattggt  
4261 gaaatatcta aatgattatt agcgtcttcg ctatcttttt cttcatgatt atctttttct  
4321 tcatgattga aaaattttct aatccatca ctgatatttt tactttgaga agtaaagaat  
4381 atattcttat cgtaagtttg tatttcaaga tttgtaactt cgtattctct tggtttaaaa  
4441 aattgaatca taaacctttt tgctattaaa ttatagatga ttttttcttc ttcttttaaa  
4501 agtccataat cgaaattatt ttgagttggt attatcccgt aatgagcaga aatattttta  
4561 tcattaaag ctttaccttt aatacttaa tcgctatttt cgattaataa atttaaatct  
4621 ttttcgctgt tttttatatt tgatttaatg gcatttaca tatttggagc ttgttcaaac  
4681 attgtttcag gtaaataatt acaatctgat ctattataag ttatagcctt atatttttct  
4741 cttaaaattt gagtgacctc taatgtttta tcaggagcgt aaccatatac tttagcacat  
4801 tctgcttgta aaactaaaag actataaggt aaaggcggat actctttctt ttttcttta  
4861 gaagtattaa gtaaacctgt cttattgata ttaatttctt ttatgttttt agcagtattt  
4921 tcatcaataa tcttttcttc tgtttttaat ctgcattaa aaacttttcc atttagtcca  
4981 aattttccta ataacgaata ataactata cttttaaaat tttcatattc ataactctct  
5041 gttgttacia gtccataaat aggagtttgc actctaccta aggtaagaac ctctttgaag  
5101 ccacttttct gtgctacgct tgtaaaagct cttgtaagat taattcccac aatccaatct  
5161 gcttggcttc tcgcaaaacc tctttcactc attcctttta attgagaatt tggtttcatt  
5221 ttagaaattt cgcttcttac agacttagga gttaaatcgt taattaaaac tctaaaaatg  
5281 ggtttttgtg tttttgaata ctgaataatt tcatcaataa gaatctgacc ctcatcatct  
5341 gcatcaccgc aatgaacaat actatcgact tgatcattat gaatcaattt gcaataatg  
5401 ctttaattgtt ttttgctatt ttctatagga acatatttaa attctttaat atctaaaggc  
5461 aaatcattca aattccataa cttccatttt tcattataaa tttcagggtgt tgcaagcttt  
5521 aaaatatgac caaaagccca agtaattaaa ttatcgcctt tttgaatata tccctcatat  
5581 ttattaatat caccatctaa accttctgct atagctctgc caagttcagg tttttctgct  
5641 ataaataatt tcattttcac ctttctagtt attaatgcta taatcttctt ttgtcctcga  
5701 tttttctata gtttgatttt ttacaaaact actcatcttg ttaaaaaaat aacttttatc  
5761 tttttttatt tccttttaaa ctttttctat taatccactt actccttctt cttgcgttat  
5821 aagttcttca attaatattat tagttttatg aatattttct tctttgctta gctcttcaa  
5881 ttcttgtttg ctgatatttt tattgaaatt attaatatat tctatggtgt ttttaatgat  
5941 ttttaagcat tcttcttcat ctaattgagt atttttttcg gttttattcc aagaatgatt  
6001 taaatcaaat tgtaaaactt ttgtaatttc tagattattc gaaaataaat caatttcttt  
6061 ttgatctttt gagtttaaat ataaatattg aggaactata tatccattat ctaattcttt  
6121 aaaatctact ttttgatttt cttttaaacc tataaaaccg caaagccatt gtcctttatc  
6181 atttgccatt aaaagatcat tgtcttgtaa tttttttaga ttcggatatt caacttttat  
6241 tatagtatac ggaatatcgc ttatttgccc ttcttttttt tcaagctcta tataatttgc  
6301 tttcattttt attcctttta attttgttac ttataattac tattaataaa taataactat  
6361 aaatatgcac ctttataagg tgcataattt tatcttccaa actcttgggtt ttgagttttt

6421 tcaggctctt tgatttcttg agtttgcctt attgtttctt ccttagaaaa accatcttgt  
6481 tgttttgatt tttgctcttt ctttcaact tcatttttta tttcgaacc accatttcgg  
6541 acaatagcta aataaccatc acctttttca agcttagttt tttccagagc ttctttaatc  
6601 tcattattag aaagctttat gtgcgtgtca agataaaaaac ttttactacc atcttgattt  
6661 tgaaattcgc taattccaat tccttcaatt aaagcttttc cagcttctct tttatcattg  
6721 attgcatgat agaacttttt agactcttta ttccaatgat tattgatgaa aacatgatta  
6781 tctctattgc ttctttcttt tgcactctgtt ggcattagca caatattatg agaatcctta  
6841 tctctattca caaaataatt tttccattca ttattttatt taaaagacgc agtaactgca  
6901 ccttgatcca tgccagcaac ttttccagcc tcttctatca catcaactaa agcagtagca  
6961 acttgccttt gcttaatctc acctgtttga gcgtctttat aatttaatgc attatttaca  
7021 tcaaccataa gtcttggatt gcttccattt gataatttta tgaatgccat tttttctcct  
7081 tttaaaaatt ttttgttttt tggttttggt ttgggaattt aaaaaaata tatataatta  
7141 catgttcatt cacctccttg tagtgtgata tgaatgccat tctcatcttt attaagaatg  
7201 gttttgtttt ttgggaagct caaagttaag cttttatctt tttttcttt tataacgata  
7261 gagcttaatt tttgggcgtt atgagttatt tttttataat cttcgtattt taaatatacg  
7321 atataagaaa aaacgcaaaa agaaatcca aagaaagtaa aaaatattaa tgaagtaatt  
7381 aatgctcgtt taatattttt agttattctg gaaaatattt gagaaaaatc taaaattgct  
7441 tttttttcct tttctaaaaa caatttcaaa aactgatcat atgtttgtaa actagaactt  
7501 agcctaagtt caattttttc tttaaaatct tttagattgt catcgcctgt ttttaaagca  
7561 ctatttaaag attcaagaag cgtattatca aaattaacca aaaaattgtc aagcaaagct  
7621 ctttaattgag ttacttgctg agcaaaatct tctattttta ggtttaaaaa agatgaattt  
7681 aatgtttcaa gttctttttt cattaaaagt gttttattaa taatttcaa ttcttcttga  
7741 ctcggggat ttttaaaata tgaatcaaa gttttaatat ttgtcttaag tttaaagaaa  
7801 ttttgttcta aatcttttaa aattccctct ttagtatttt catcaagagt gttatttaat  
7861 cctatgttga tgatattggt aagaatctct aaaattttta tttgctcatc aataatttct  
7921 tgataattac aaatttttat ctctacttca tcaaacaaag aattactttc attctcttga  
7981 tttatttggt catcatcaaa taaattttga ttttcttcag ccatcattat ttctcattta  
8041 tccaacaatc ttttttaata attatttttt ggtaaaaagc aatatcaatt ctgtaatatt  
8101 taccaaatcc tatttgtttc cttttattga ctggcaatct aacaaactct gcataactta  
8161 caggaactaa ctctctctct tgttcttttt gagagatagg taaggcatta taaatttctt  
8221 gcgatacttc ttttaactca taacctcttt cccagtcttt tttttcataa aatttagtat  
8281 tacaagtata ttttagatga taatctgtgt atttcgatga agctaaaagc ctgcaagaat  
8341 ttgtaagttg tggattaatt ctatatccat aatgctttat aatttcagtt gtacaacat  
8401 ctccatgaga gcagtttctg atagtttcag ttcttaatac gatactttca attcgtttat  
8461 ttaatacagg tatagtacat tccccatcca aatgaaccaa aatatcattt ttatatttat  
8521 acatttcagg atcacttgaa gcatcgacag ggcataaatt taaaaaactt ctgcgtttag  
8581 cgattacatc tgcccatttt cgtgcatcaa tgctaaaata tcttgccaaa gctgcaccgc  
8641 attcaggtgg ttttaacagga cttgcaagac aaagcatcgc ttcacaagct aatttagtat  
8701 ctctgttaa aacatctatt tttattgcgt ttgatgaaga tacaactcca aaaaataaaa  
8761 ttgttgcgaa agtaattttt ttcatattt ttctcctttt gcatggaaaa aaagcatatt  
8821 gacagtattt ttattaccct tgataatatt taatggttga agaaggattt ctgcttgaac  
8881 gccattcttt ttaaaatatt cattatattc ttgaatgaca tttttttcgc ctattaaaat  
8941 aatccttttt gcgttatgag ccaaaagaaa agttttaacc acttgctcat tgctaagtaa  
9001 accttctttg ttttttgcta attctaattg ataaatcaa tccatattgc tcaatcttga  
9061 atcttttaga acaaatat atctttcttc caataaagaa ttatttaaag aaagttttga  
9121 accaccttcc aatttttttag gttttggtgc agaaacagca catcctgtaa aaactatact  
9181 tgttagtaaa agaaaactaa gcgttttttt cattattctc tcctgtttgt ggtatttgta  
9241 ttcgacattc tcctctttga aaagcccctt ttaaaatatt ttcttcaggt atgcctttaa  
9301 tttttgccaa agtgggagaa acttgtttga atttatcgat aaaataagga tcattgtaat  
9361 aaaaagcttt tttgcataaa ataggctttc cattatctat agtaatgagt tcatcctcaa  
9421 aagacatttc tcgaagtctt tgtggaagca ttaatgctct gctcgtctcg ctataacttg  
9481 tagatccacc actcgtcctt acacttcttg atcttgtttt aaatgtagta tttccaagta  
9541 ttctactaat ttcttctgca tcttcttgtt ctctgggtgt ataaaaaatt tgacaagcgt  
9601 gattagtcaa aagagttttt gctccatcat ctccatatcc atcaggagca ggtgctttaa

9661 gttgagattt tgattgataa atcatcaaag agcgtaacca atatccagcc ataaaactta  
9721 ctgccgaaag ataaatagga atttttctag gtgctgtaaa ttcattccata agcattaagc  
9781 aagtatattt aatttgtggg ttttgttctg gaagtctttt tgtattcaaa agaataagtt  
9841 gtgaccaaaa aatatttagt ataaactttg cattagttaa ttgatcaggg gttataccta  
9901 tgtaaatagt cattttcttt ttgcgtaa atcccttaa atcccttaa atcccttaa atcccttaa  
9961 aaagttttta tacttctgct tcaaaaggag ttaaaggctc gttaaaagaa gacataaacc  
10021 ctgattttgt attatcactc gaaatgctaa aataagtttc tagccttctt tttgtaatat  
10081 ctgaaagcag atcatcacia tttgataaat acttataagt attgtcaaat ccattttatt  
10141 ttttgccctc atgctcaaaa gtaaaacctt ttgagagttg caatattcca aaaaaagaaa  
10201 actctgtttt cagattaaaa gtttctaaaa aaagtttccc atcttctctt aagttcaaat  
10261 cttccataa atagcaaagc cctataaata aattttgctc aagccatta aaaaactgag  
10321 ttgtagaatc tccttctttt ggataaatga tatttgcaa atccatcagt tgactatcac  
10381 aattatcact atcactcata tcaatgtaag tcaagggtt ataacgatga gttctttttg  
10441 aaaatggatt aaaaagaaaa acatcttgac ctaaaatctc ttttctatat ttgcttgtaa  
10501 aatcaaagca ttcctgctta atatcttgca caacagcact tcttttcaa tccattaat  
10561 ttggatttac aataccaacc cttttaccgc tcttgttagg agcacctaag gctacaaact  
10621 gaggactttt aaatcttaaa aattttctt tgtattttcc gatgattatt ccattatctg  
10681 aaaataattt catttttttg atttctgcta aatttgcaa tcttgcctca ccaattgag  
10741 tttttttact tttggctatt aacgctaaaa atattaaaac aatggcacta aagccaaaca  
10801 tagcaaaaaa agaacataa gcttttgggt aagaatttat taatgcttca aaagtaaatt  
10861 tgagattata aaattcaaaa attcttttta aactcacatc attgagataa aacattaca  
10921 atgggcttaa aaaataagct attaagagtg aaaaaatct tataaaaaa aacattataa  
10981 ttttatcttt catttttctc tccttttatc attattcatt tccttaaaat atatttgact  
11041 aatatgtctt tttccattat gagctctaat gtgaacaact acatcaataa gatttttaag  
11101 catatcttgt attttttcaa aaggaatttt ttgacctgt gaattttgta aagtcattaa  
11161 agctaaacgc tcaaatgttt cgtgagtact tcctgcatga caacttgtaa tacttccgcc  
11221 atgtccacta gagagaacat ttataaaatc ataagtttc gcacctctaa gctctgcaag  
11281 taaaattctg tcaggcttca ttcttagaca agactttaa agcgttgacg aatttaaaaa  
11341 atcttactt ttagcttctc taggataaaa aagttgaaca aaattattat gctcataaaa  
11401 ttaatttct tcaacatct ctatagttat aattctttgt tctttgggaa taaaatcaat  
11461 aagagttttc ataaaagtag tttttccact gcctgtacct cctgtataa tgatattttt  
11521 ttcatactct actgctttac aaataaaatc tttaaaatt ttattttggg aaagcttctt  
11581 taattcctca tccaaaggat ttgttacaa atgatcgggt tttatttctt caaaaagccc  
11641 acttttaaca tgatcttgta ttaagaatct tttctcactt ggttttctaa ttgtaattga  
11701 aatatgattt ttttagtctg ctggaggat tactacttga accctttctc ctcgatgtaa  
11761 aatacaagaa agaatagggc gtgattcatc tattttatca tctttaaag aagccaaaga  
11821 agtagcaaac gatttagagg cttcataatc tagtttactt gtttcttctt gccattttcc  
11881 atcagtggtt tgtataaaga tattttcttt gccgttgtaa catatttcag ttacactagg  
11941 attagttaaa tgttttcaa aaaaatcatt agctaatttt tctaaagttc ttgaactact  
12001 catttaaaaa cctcttctt ttaattgata aaccttagaa aatcaatat ctctatttac  
12061 ataaacacca actaaatcac catgattttt ataaagagtt ggttgaatat tgatcatttt  
12121 ttctaaagca gtattagcta tttcacgaga agtttctctt gaattttctg tataatcaac  
12181 gctattttct tttttattaa taacttgatt ggctaaaata tttaaagaat catcgatgat  
12241 tgagagtaaa attgcggaac caaacgctt catataatga tgatctacc atccttgat  
12301 accacttgca ccaagctcat cggttgcacc agaataaaca gggatgataa tattgttcgg  
12361 cgttctaatt tcttgccaaa tcacaaaaag tctatccatg ccatcattta actgtccaga  
12421 actaaaactt cctgtaatag tgcttcttt ttcaattaaa agaacattac catttgatga  
12481 atagacattg tttgaaacaa tacaagcaat accacctta atagtgtctga ctaaactgag  
12541 ttttaatgaa catccaatat aagtccttt tgataacaat aaatttggat caaactgact  
12601 aacactggca ctagtcggag taaaaacatc tccgacaaat tcattagaat tgccaccatt  
12661 ggataattga ttagattcgg aattaaaaat attatttgaa taacctctt gtgaactatt  
12721 ttcctgctcg taagaagaat tttcactgtt actattactt actacaacca ttcctactcc  
12781 cttaactatt cttggctgta atggttttga gataacctca aaaggatttt cttttggagc  
12841 tactttaaca gattcttctt gctctcttga ttttaataaa tcttcaaac ttttctttc



12901 ttcttgata ggctcttctt ttggtagaat aaaatctctt agttttacac tacttgcaat  
12961 atctttatta gtttctttaa tgttcgagtt tgctgcctca tcactactgc ttatgaaaga  
13021 ttttgcaaag atatatccga aaagcaataa tataaataca caagcaataa aaaacacata  
13081 gatttgaatt tttttaacat ttacactttg agtttgtaac tcactttgca aatccatctc  
13141 ttttaattct tgtttttcat tgttactcat gattatttac cactctttgt atattttcat  
13201 tgggaagttt tctagttcta tccaaaggat ttttaccaaa accattattg aaaataccaa  
13261 caactttatc accacttctt aacagaattt gttttgcaat tttttgaacc actaaaacat  
13321 catattttcc atcttttcga atatgagtat ttaaaatcat ttctttgcca ttttcatata  
13381 agaaaacact cggaaatggt ttggtattgt caaatccaa ataagtaaaa acaccatcat  
13441 cataagcata atttgggtct atctcttcac ttcttttatt agctttcatt aaaaagtccc  
13501 agtttctagg aactatattt ttatcaagct cttcttttat gattttcttt tctaattctt  
13561 tttttatttc actttcttgc tttaaaattt tgcagaata attaaaagac aatttataag  
13621 ttgcttggtt gctatcatta gtttaacaaca aatcaaaaat ataagtcttc aaattcgtag  
13681 taacaattaa atttgttttc caatctcttg gatttggatc aacaatcatt tccttttgtt  
13741 ggctttgggt atacggatca ttttctacaa aaagtgttgt tttataggct ttcggtttaa  
13801 taaataaaaag atttttcttt tctattaaat cccaacctc tgcaaaacct gtggcagttg  
13861 ttgtaataat ttcatcatcg ccaaattcaa tcacgctcac aaaaccattt ctagctatca  
13921 ttttaataac atcttttagag ttgtattctg catgtgctat gcgttgatca tattctgact  
13981 tttgtggctc atttaacgca aaagcggtag acgccaaaa gaaaaaagaa agggaaatca  
14041 aagtaatatt tttcatctta tctcctcatc aattctgtaa ttagttactt taaaaccaag  
14101 agggtttaaa attctatttt cttcacttgt ttttgcttgt aaaaagtcatt atgataaagt  
14161 tatgacttta gtagattgct gtgtgctttt ggttacggaa tcttttttat taattaatgc  
14221 tcttatgggt gaagttttaa caccattact atttccaaga acgatactta aaattttaac  
14281 acttacttca acattatctt tatagatttg atctaaagcg ttagcaccag cataaatagc  
14341 tctataatca ttcgcaacat tctcatcgct cattaattga gtgagtaaat aatcttgatt  
14401 taagaattta taataatct cctctcgagc ttttatatat tgagaaataa aatatttatc  
14461 cagagcttca atagagctaa tttgctcttc ttgtaagcta gtgataatat ctaccatgcc  
14521 agtagtatta tctaccctaa taacatatgg ttctgtgggt tttaatgggt ttagaaaaac  
14581 tacagccact atagaaataa ttgatattgc catgcttata aatgcaacta gccaaactct  
14641 ttgatttgat ttttcaatta aatatcttac acttgcttca aaatttaag cattagaatt  
14701 gatttcattt tggtttttca atttttctc ctttctttaa aattttattc aaaacttcag  
14761 tttcaatgat ttgaatatct ttttctttaa aaaaaagatt ttgtttttaa acttttcaa  
14821 aaacatctcc ttgctctgta tagtaggaaa tagaataatc aaactcacta gctttaatta  
14881 ttttattttc agaaaaagag ttagagtcatt ttacattttt tcttaaaatc acataagaca  
14941 tagtcggatg atttaaaaca attatttttt tctttttggt gtttttgttt tcctttatca  
15001 aagtttcttt tttttcaaat actggcgtat tattttctat ttttaaaaac ttctcttgtt  
15061 ctttgatatt attaattgca acccaacct ttttatcatc aaataaatag ttatagttag  
15121 tattattttt agtagaaca gactaaaaa taattgtaaa taatgctaataaaaacact  
15181 tatgcttcat ttctcatcct ttgtaataaa tttttgcca aagacatagt attgctcct  
15241 gctacactag cacctgattt catcgcagaa taacacctt ctgccatttt agaacctcct  
15301 ttttgagtgt gtccaaataa atttccaaga gtttttccag caacagaact tataggatta  
15361 ctactcttg aaaaacact ttgcatagca gaatctaaag caacacttc tactttttca  
15421 gcaaaaacct ttgctacaaa aatcatagcg actaataaaa cagaggaaaa aatcattgat  
15481 attcctataa aaaaagcgtc tgcacttgca ttcatatatt gatcttgagc atatctagca  
15541 aaacgatata tttcttttgc aaaaacctta aaaaacaac tcataaaaag cactaataag  
15601 gtattagaaa taagcaatgc aagccattga gtaaaaacat ttttagtgct tttatataaa  
15661 agacaataaa acattaaagg tgcggcgatc accaatatag tttgagtaaa ggcagttgca  
15721 ttaatcacta ccaagcagg taacacagct ataccaaatg ctatataaac tataattaca  
15781 gtaattccag ctattactgt atcaaatcca ctagccttag cccatatatt atcagctaaa  
15841 tttctaactt cattaaaaat aatatcaatt tgcttataca tactaaggct gccgccgcc  
15901 cactcatgaa agccatccat agcattaatg actaaagtaa gccatccacc gatattttaa  
15961 gcaaaagtga tgatcatagc cttagcaact aaatcccata tcacttcttt agtagggctt  
16021 tgagaacgac cgaataaaaat ttcataacct ttatacataa tagtaaccac aagcgtaatg  
16081 gaaaaaagta cagcaagttg agtcattttt tcaactcaatg ccgcatttct aacaacctcc

16141 aaaattgcat gtgtagcatt accgagctct gtaaagaaat taccttgcac ggcagctcct  
16201 ttcttttaaaa tttgttttta ttttaattaa tttggtttta aaattaagtt tttgtaaaac  
16261 ttgtgttttt ccatttttaa atttttctac tatttcatac tctattagtt ctataaattt  
16321 agaattttgt tttgtttcta tttcatttat agctttgact atcttttcct tataagggtg  
16381 atcggaaga tcatatttgt tgttataaatt ttctaatttt ggtgcattgt tagacgcata  
16441 ataaccttgc tttctaatac ttggcaagac ttctttaata acccattgtc taaaaggcct  
16501 tgcttttggc ttatcacttc tcattaaaac aaagtaaagt tcaggttcat taattacaat  
16561 aaatttttgc gttcctccag aagtttttaa ggggtaccac tcaaaaccgc cccctttatc  
16621 aaattcctta tttatagagt ctctaacact atttgtcttt tttatattta atattttgca  
16681 tatatcattt aggcaaaaca aaggttcatt gtatttatct cttattgttc ttacttgtcc  
16741 caattcttta ttttcaaata aaataacact actcattttt cactcctatt taatcaaaca  
16801 aagcatcaac ttctttatca ttttttttc tgagctcgcc ataatccaaa ggctctttcc  
16861 ccattgattc tgcaaatagt tgtgccgctt gatcttgtct tattcttctt tgattttcat  
16921 aatgcatatt agaaatttca agattagttt taataatttc tagtttgggt ttttctacat  
16981 taattgcatt attaagtca ttagtttctt ttatgtcctt agattctata agcttttgggt  
17041 ggagtttttc caaagacttt gctacgggat taacttggat agaagcttga ttataatgct  
17101 ccacttgagc agcataggta atcatatcca ttctacatat tctttttctc tcttactca  
17161 aataactagc attgcaacga tcaaaaagag taaatttttc aaaagtttct ttacttttat  
17221 cgcttaaaaa actttgtgga tcttgtaaaa catcattata aaaagattga atattttgcc  
17281 cagcctctgc aaaatctaaa taaatttgtt ttgtatcatt cataaatgat accgaatccc  
17341 ttattcctgt tttcgataag agctcatctt tgtatgcttg tatttgttgt tgatagtgtt  
17401 taaccgtatc tgtccatctt gtagcttgtt tagtccattc tgcaatttct tttgcatttt  
17461 gggttgccat ttgtgaattg gcagtcgcat caactacagg aatgcctgca ctaaaagcta  
17521 aatttacaat acataacgat gagattatgg agaataaaaa tttattttgt tttttgggtt  
17581 tgggatttag cacagagcaa taaccatgtg acttaattaa gatgaagttc acacacttta  
17641 tcttagtagc aattacacta ctttttattt ttgatttttt acagaaaact ttaatatcat  
17701 caaacatcac ttctttactc cttgttttta ttaaaactac ttttattttt tttatgctac  
17761 aatttttaca acgatattag ggtctaattc agtagttgta tctttatcgt tagaaagaaa  
17821 ttgtgtaact gtgttgaaat acccgattgc ttttttaagt agtcgggtt tttttgctc  
17881 tattttggcg gtagggcggt ggaagggat ttcaacacat aaaggaaaaa caatggaact  
17941 ttaataaagc accattgtgt ctgttgcttg cactatgaca attttcttta aagaagagat  
18001 aaaactctt tttaaacgaa catagtaaaa caacacacaa tttttttcat ggggagaacg  
18061 aaagttctct ctattcttac ttaaacttaa tctcattgtt cttccttata aaatgtttta  
18121 agctcattaa tttttcttc taaagtttta ttttcttgggt taaaataact ttctattttt  
18181 tctatatagc ttgtgcctgt agataaaatt tttaggtttt ctttgcctaa agatgaaaga  
18241 tcaaagaac aaacaactgc ttcatcttgt cttttaacaa ggaattgtct tttgtgcggg  
18301 gcaaagtttt taactatcaa aaattcatct ttactaagac ctagttttaa atactcatct  
18361 tcttttgcta atgggttttc taaaaatatt tttgtagcag attgctcaac taaagtattt  
18421 gctatcttta gtttcaaaaa gtcctctata ctttgtgtag caagtcttaa gaatccattt  
18481 tgttttctta tggtttttaa tttattcttg acctcctctg cgacaatatc attttctaac  
18541 catttccaag cttcatcaat atctatacaa agtcttcttc catctgctaa attcataaca  
18601 cgccaaagaa taaaataaga aattagtgcc gaaacatctt tttcgtctaa aaattcggtt  
18661 ccgtcaatac caaataaatt aatatcatca ggaaaatcca aattgtcata ttcggtgtcg  
18721 aataccagc caaactgctt ccctctttga aaaagagata atctactttt taaagaatta  
18781 ttgtcattaa aatcatctgt gatattttca agaagcaatg aaataggata ttttctttca  
18841 ttaatatcaa attgaaacat taaggatttt acagcttcat tgatttgttt ttcttctttt  
18901 gtattaagaa tttcgccatt gcgtgttaca caaagtttta ttagctgttt tagaaacctt  
18961 aaattttctt cattattttc aaccataaag ggattgaaac ctgtcggctt gccattgttt  
19021 atagaaatat atctacctcc agcaciaaagt atgttgccta acgcacctt atctttatct  
19081 aaaaatacag cagtaaatth ctttttatct tcaggagtat ttgcgggaaa actatcttta  
19141 ttagcatatt ttatcatttg atcaatgatg aaactcataa ataccgtttt accaccgccg  
19201 ctttgcctta aaattaagggt attagctaaa ttcaagtcgc caaactcatc tttatttcta  
19261 ccattgcttt tgtgaaaatt taaaaaatat ggttgtttgt ttggtgtttt taaaatagtg  
19321 acagcattac cccagcaatt tttttctttt ttaccatta agaaattatg taatgcaacc

19381 aaagatgaaa aatttaaaga tgaatcata tgaactcttg ggcgtattgc gaaattgctt  
19441 ggaaattgtg aaaagtaaga agcaggcaat gcaatatttg ccaatgttga agtaaaccct  
19501 agactattta aagaagtaat tatcttgttc gtactttgct tacattcatc aatcgaatca  
19561 ccaaaaacac aaatattgaa atgataatth ccaaaactta tgacattact agttaaataca  
19621 tctaattgcta aatttaactg ctctatttga cttacgccat catcctcact tgaattaac  
19681 tgatttattt gtttgtttaa tgcagattht gaatcaaatt ttgacaaagg gacaaatggt  
19741 tgcgtgatga tataatctgt attaagatac attaaagaat ctaaaatacc agaaaaagtt  
19801 tgattagaat aatctttaa tcaatacat ctagcaaatc ttttcgtatc atcattatag  
19861 ttcaattgaa tcatatcatg attgaattga atatthttta aggaacctgt taaatattga  
19921 tatatcggac tatcacaac cgcaatagga ttaaathttc cgcttattaa ataattataa  
19981 aattccaact gttctgaata tctaataata ttctthttat atacgcttaa tathtttggg  
20041 ttaaaatctt taatattagc ctcaathttt cctaagtatt cttgaaattt aataacaaaa  
20101 ttcgaaattt cttttgcttt tgatttataa tttagttttat taaaggtttt taaatcaata  
20161 ttagatttca aaggcttgta aatcagagtt aaataaagcg agttttgctg aaaactthtt  
20221 ttatcaaac ttttatgata tttttcatca atctctthta aaaaaggatt ttcaaaataa  
20281 gaatctaaaa attcatgcaa tttgaatctt acattgtgaa aataaaagct tacaggctcg  
20341 ttagaaaacg acattatcat catattcaaa agathtttct taaaagttaa attctcatct  
20401 gactcacatt caaattctat accctcaatg aaaaatgtgc taattaacat atgttcttht  
20461 gtaatgacaa tgctatcagt aattaaagaa ctataaggaa ttaactthttc taaacttggc  
20521 tcagtatgaa tcggaatat ggataathttc ggaaaatcat tgttagtcgg caatcgthta  
20581 taagtcgaac tattaaaggt tttagctthta tgatathttt tacttaaaaa attgctgata  
20641 aatttaattt ttaaaaaaaa caatctaac atttgctcat ctttcttagt cattgcttht  
20701 ataataaaat gtgaaatgac tccaaaaatt aaaagaaaa actgttgagt ataaacagat  
20761 attaaaatga agcctaaaat atttatcaaa aaaggcatta aaggcactcc aaaaaggagt  
20821 gcagggcgag ttaatcttht aaaaatagga tcaaaaataat tattcatatt ttatctact  
20881 aaaagtgtcg ccaagaaga agctgctccg ataacaatac caccaatgac tactggtaga  
20941 acttcagtcc attgttthtt caagattgcc attcgataac ctgcaatacc aaaagctatt  
21001 gtaatagcaa tcaactgaaac accaaataaa gctgcttcta tatcttgtgc taaggattaa  
21061 actttgtcaa taccaccaac agcaaaagct aaatthacag ctaatgccat taaaaaatt  
21121 tgcttaaca tttagaat cttttcatta aaaaataacg aacgataaat ttagthttta  
21181 tattaatat aaatgtatta tttgathttt atthttttht aaaatthaa atataataga  
21241 tathththtt gaththggat aaaaaggagt aaatthggta accaaaaaat caaatctgta  
21301 tataaaaatt ttaaaagcaa gaataaatat taaaccaagc ttaaaaaata gattaagagt  
21361 gtaththaaat ttaaatctg aaaaagthta aaagaatata gcaggcgaga acaataatgc  
21421 ttgattatga aaaathtcaa acaatgagta aagaagaata tthtaaaaa tataatgtcg  
21481 gaattaggth tttgthtggg tgcgatatca atcaaaaaga tgaathgaa atgataagcc  
21541 ttagagthgt tttgccaag agtathttc aagaatacaa aacattgac atththaaag  
21601 caatggactt gthtaagaa acgctattat ttaagaatt aacagaaca agcattaaga  
21661 ttgaththga aaaaagagaa tttgtaatgc ctgaththtt tattaagcac gatatagaaa  
21721 tcattcctta ttttacgcaa ggtggcgaaa aagaagaaga attaagcaaa gagaaathtt  
21781 ttgaacttht aaaacaaac aagatgaaag aathaaacta tttatgctth ttgththttg  
21841 gcttthttt tgaagaagag tataaatatt tttgcaaagt aaaggagtht aatgaaact  
21901 aagtgaattt gathtcaggg tttgggacaa agatgaaaa tgctthtttag atccttacac  
21961 aaaaagcaga gcagthgtaa aaathttacc aaatgaaaa ttathaaatt tagaaataga  
22021 actthttaca ggaataaaag acaaaaatgg caaaaaatc tttgaaggag atathcttht  
22081 atataaaaa aataagaaaa aatacattht taaatatht gatgthttta gtcaththta  
22141 agaaththta ttctthaaat atagctthga taaagaagth caaacgatca tacaatctcc  
22201 ctattctcaa atagaattat cacacaaatt agathgtgat tgcaathttc ataacaaagc  
22261 aatgaaatt taththgaag ttatcggcaa tatccacgag aatgaagaaa tctthaaaaa  
22321 tacggagtht ctaaagtga agatgaaata atthaatca taaaagaagc tatgggagaa  
22381 aactataaaa agththttat gataththca gaacatatha aaaththaat caaththttat  
22441 cctagcaatg aaaacggact tthththgaa tataaatcaa gaatathttc aatgaththt  
22501 atatcgataa taatgththga aaaaacaggg caaaaatta atataagtht atthththgaa  
22561 aatacaagaa aaaaagaaaa aaththtagaa tthaaatccag aagaaaaaaa ttcagaagag

22621 ttaatattaa aagcttttatt tatcaaaaat aaaaaagttt tattgtcaga tttatattatc  
22681 ttagacaaaag taagtatgta ttatacccga aacaaaatgt ttaaagaatt tcaaaaactg  
22741 atgatagata ataaagaaaa aggaatagtt tgaaaaatac tatgtatcca tattttattta  
22801 atgataaaat caaaaatcat tctatgattt tatgcacaga gattgaaatgt aaaaaatgcg  
22861 gagaaaagat ttatgttgaa tttcaggcaa atgaaaaatt tatcttcaaa tgtcctaatt  
22921 gctcgagtga aaaaaaatag aaaggttttt tatgcgttct agcttagaaa aagtgataaa  
22981 aaactatagt gaaaatTTTT caaataaaag agataatgat tttgcacagg gtttaataaa  
23041 gtatctttat gaaaatgcta ttataggcaa aaatgataaa ttttttttag aaaaaattg  
23101 tcaatatatt aggataatca atgaaaaaga aaaaagattg atcaatgtgt atttttgtga  
23161 aaaaccaata attgattttt ttcaaaatgc agaataatgaa aaagaattga aatactatgg  
23221 aataaatgaa aaagatttta tagaattagc aaaggagtaa aaaatgattg aaaaaaactt  
23281 aactaaaaaa gaaatgtttt cttatgcaat ttttatagca attatcgctt taatttgc  
23341 ttttaaaaaat gaaatttggg aatttgtaaa atttatTTTT tctaatttag atttcattgt  
23401 aggcgaagat aatatagtat tttttccaat tacaactctt ttaatagtat ttactatagc  
23461 tatttgtgct gtttggggat tatctaagt tttagctctc tcattattta taatgcctat  
23521 atttgtcgca gttttttata tttttaatat aaatataagt ttagaaaacc tttatggctc  
23581 ttattttata tttttaatca ttattaatgg tattttgtgg agtgtaaadc aaagatgaaa  
23641 aaaattacaa tagtagcata cgcaatatat tttctatcag gcttatgggt tttgtttagt  
23701 gcttttaaag agcattttga cattttatct tttattcttg gaattgtatt catttatttt  
23761 ggtgttatta atacaaaaag aattttgaat gattctaacg agaataaaac cgagcttgaa  
23821 actctatttg ctacagcaaa tattatTTTT gtatcgataa gttctatttt tcttttaatg  
23881 ctcatcact tttttgcatt tcaaaatgaa ataaatatta aattcttttc agatcaaggg  
23941 cttgtattaa aagatgataa aaagatttct atttatTTTt aagaaaaaga gattaaagc  
24001 tttgatgaaa acaaatatgg atttgtaatg gctgtttatg gcgataaaca cattgaagtt  
24061 gttttgcaaa acaagaaaa cgatacctt tttgagttaa gatgtaatga ggaaggttgc  
24121 aaagaagtat taaaggagaa taaatgagag tagtaaattt gtcaaaaaaa tttgtggata  
24181 aaattttgtt tttgagaata aatcatgttg ttaatatctt tatgttaatt ttggctttgt  
24241 tttcaactat tgctattgca gtatTTTTat accattttat agaagaagaa aattactatg  
24301 cttatTTTTgt atctagTTTT tttgtgggtga acgggtTTTT gctaactatt catttaattg  
24361 gtgaaaaaaaa gtgtgcaaaa gaagtgtatt atgatgataa ttttatcagt aaacttaaca  
24421 actctttgag aaaagaatta gaagatgac ttttaaagct tcaggaatac tatgatggaa  
24481 ttaatgtttt agaatacaaa acttttgctt tgttaaaatg tagttcttat tatgaaaaag  
24541 gcagaattga tgaggaactc atagataaaa tcaaaaaata ttacattaat ctttttaaaa  
24601 agaaaatagc aaaagaatta gaagaaatgc agaaagagaa agagagaagc aatattttta  
24661 aaacaaatca agagttaatc ttgaaaaaga taggagaata aatgagaata aattatgaaa  
24721 aattaacat taagccaaaa gttttcggaa caatttttga gaagaattaa aaaaaatatt  
24781 ctccgatgct attagctatg ataatatagg cttgcatgat tcaagaattg ctgacattac  
24841 aaaaattcct ttagcaacat taaacaattg gaaaaaagat gagtcaagct atagaaagaa  
24901 aatttattat tttttaaaag gctctgatga aagcatattg aggaaaattt ttattttaa  
24961 ttttttgata gatattTTTT ccatacaagc ttcgttttcc atatactcaa aaagtgaatc  
25021 actttttttt ggctttcttc tgtatacatg aatataactt ttgcttctga aataaaaaac  
25081 aacaataaat tttttatcat tgacacataa tatatttgat aaatattttt aacatttttt  
25141 atgtatatct tcttaatata tattttatat ttttatgata taattatgat atataataaa  
25201 tatcataagg ataagtatga ttatatccat ttgtaacgaa aaaggcggaa gtggcaaaaag  
25261 tacactagct gtaaatttag caattaaagc agcagctgag aataaaaaag ttttattgtg  
25321 tgatagcgat ccgcaaaaat ctgttatgac ttttgcaaat attagattag aagaaggat  
25381 taatagaaca ttttctattg tgtctaaagt tgggtgaatct ttaaaagagt ttatacaaaa  
25441 agaaaagaag aataatgagt atgatttgat tattattgat actggtggca gggattcaaa  
25501 agaaatgaga attgcactag gcttttcaga tgttgtgatt attcctacaa ttccaagcca  
25561 atttgatgtt agtgttttgg ataaaaatgtt tacaattatc aaaatggcaa aagagctaaa  
25621 taaagagcta caaacatttg tcttaatcaa caaaagtcc ccaaatcctt tcttaataaa  
25681 aaaaattgaa gatttaagaa actatatcaa agaacaagaa aatgaagata ttaaactttt  
25741 agataatatt atctgtgaaa gagaaaaata taaaacttgt attcaaatgg gtttagggat  
25801 tagtgaacaa gaaactaact ccaataaagc tttagaagaa ttttaacttt tttacaacga

25861 gttaaaaaat aaaattaaag gattataaaa tgtcatttaa aaaaaataca aatgtagatt  
25921 taaatagttt tattgatggt gctactggag aaacctcaaa gcaaagagta tctggtagaa  
25981 ctaataaaaag agataaaaaa ctgctcgttg gttttactaa cgaagaatat gaaagattat  
26041 catctatggc agaacaaatg ggcatggata aagggtgcttt tataagattt aaaattttca  
26101 ataactatta attaaatatt ataaagatat gttttagata tgtatataat atataaaata  
26161 ttatatacac acttttaatt aaaacagcac ttcaagtaat tttagatata attatacaat  
26221 ggtaatagca tatataagaa ttagcacagc aaaacaagat tcagaagttc aaaaactcca  
26281 aatatacgaa tattgtatta aaaataaaat caatattgat gaagttatgg aagttgaaat  
26341 gagttcaaga aaaagtctgg aaaaaagacg catgaatgaa ttaaaagata aacttaacga  
26401 ggggtgattta ttaatttgca cagaactttc aagacttggga agaagtatgc tagaagtcac  
26461 tacactaata ctagaacttt ctgaaaaagg tattcaattt gcttttttaa ggcaacctga  
26521 gttaagctca tttacaatc cttctcaaaa actacttctt tccttttatg cctatgtttc  
26581 agaaacagaa agagatttta tttctcaaag aacaaaagcg ggacttgcta acgctagaaa  
26641 aaatggaaaa aatataggtc gtcctgtaaa tagttttaat agtatgtatg ataaagatac  
26701 agatttaata aaagagctta tatctaaaaa aataacttta cgcaatatct ggaaattttt  
26761 aggagaaaaa ggaacttata acaattttcca ttatttttgc aaaagtagaa aattagcata  
26821 atatatata ctaatttaca aataatatta tttacatatt taaataatat atataatata  
26881 tgtatagaat atatatgtta tatatattta atatttattt tattaataaa tgctatactt  
26941 ttaaaattca atttttaatt ttctttgtat aaaatgttat ttccaaaaaa caaaacattt  
27001 tcttaaaaaa ggatattctt gcatggcaaa gaaaaaaaaa ttgaacgacg atcaacctag  
27061 tctattttat tttatagaag aggaattaat tattacaagc gaaaggaatg ggaatgagca  
27121 acagaatgga aagttatccg aatatggaaa tattacaaaa gagtttaaac aaactagcat  
27181 ttcatcaaat acaccaagcg tggatagaca agaaaattcc acaatacagc ttgataatac  
27241 tagagagatg ggcagagttt tatccgaaca caatcaagaa tctaggaatg tcagatctaa  
27301 tgacactagc attgccacaa acacaaatgg aattagcaat cttggagagc aaagaagcag  
27361 acaagaagag agaacagggg ttaacagata tggagatact agcagaagag caaataaatc  
27421 tcaatcaata catagcgata gaaccccaa tttattctcc tttatttcaa gaaatgatga  
27481 tgaaagacaa ggaacagatg ctgcaagaag ctacaatcaa caatcagtat tggaaactgc  
27541 agcaagaaat gatggatag aaagaagaag cctcaaatct gggcaaaaat tagattttgt  
27601 aagcgatgat gaaatctatc ttggctcttt aaaagataga tttcaaaaaa acctccaagc  
27661 cattaaactt tcaaaaacta ttgaacaaga aaatcgttac gctaccaaac aagaacaaga  
27721 aattctaaat aaattttcag gatggggcgg tattcctcaa gcttttgatc atcagaataa  
27781 agaatgggaa aaagaattta aagaacttat tagcacactt gattatgcag aatatgaaaa  
27841 ggcaaaaact tcaactttag atgcttttta cactccaaaa attattatcg atacaattta  
27901 tcaagggctt aatcagctag gatttaataa tgatgatcac accaaagaaa tatttgagcc  
27961 aagtcaggtt ataggctctt ttttgtctta tgcaaaaaat tatagcgata aatatcattt  
28021 tacttgcgta gagcttgata ctataagtc aaatatatta aagcatttgcc acccaaatca  
28081 aacaatttat aataaagcat ttcagcacca tttatttgat aagccatacg atgcttttat  
28141 aggtaatccg ctttttggtc aaaaaaagat cttggattta aatgatccga cacttaataa  
28201 aacgagtgtg cataattatt ttattggtaa tgcaattaaa aatttaaaag aagatggaat  
28261 tgctgctttt gtagtatcaa gttatttttt agattctaaa aatagcacia taagaaatth  
28321 tatagccgaa caagcaacat ttttaggtgc tgtaagattg ccaataatg cttttaaaaa  
28381 acgagctaatacagaagtta ctaccgatata tctctttttt aaaaaaggta aagatttaaa  
28441 tatagataaaa tcttggttag aaagcgtaga atactatgac gatcgttttg atgaagctga  
28501 aaaaagagat atgcaccctg atgtttttta tgacttttaga ataaatgagt attttaaaaa  
28561 taatccacaa aatatcttag gaaaaatgaa tattaanaagc tctcaatatg gttatagttt  
28621 agaatgctta gatgatggaa gagattttaa aatcgcttta gaaaatttta caaaaactt  
28681 acctaaaaac atttataaat atcaagaaac aaaaatcaag ctatcttatt acaggattga  
28741 tagagaatcg cctgaatagc aaaaatatag caaaactcta agtaagttaa aagatggaaa  
28801 ttattttgaa tacaataatg aaatttacet gaaaatcaga agcgatgatg agttagtctt  
28861 ttcaaaacct gttttaaatg aacacgatac aagaaggatt aaaaaactca ttgctcttag  
28921 agatcaattt aacactctta ttgaatatga aaaaaatgaa tctagcgatc ttttagtaga  
28981 aaatcaaaga aaatatctaa acaagcttta tgatgaattt gtagccaaag aaggatattt  
29041 aaatagagat gcaaaaaaaa aagcctttag agaagatgta gaagcaaaa aaattttagc

29101 actagaaaa aattatagca gtggtatttc aaaaagtgta gctttaaaag aaggtataga  
29161 tcctattgca ccaagtgcga caaaagcaga tatttttttc aaaagaacta taaatgcaca  
29221 aaaagaaatt aaaatctcga ctccaaaaga agcattaatt gctagtatca atgaatatgg  
29281 gagaattgat ttaaaatfff tagaaacgaa tttaaatcag cctttagaag aaacccttaa  
29341 atcttttagag caagatagat taatctttaa agatcacaaa aatcctgcaa attatgtttt  
29401 ggctgaaaaa tatctttctg gcaatgttaa agcaaagcat aaagaagtaa aaaaattagt  
29461 agaagatgga tttaatgaat ttgctaataa tttagaaagc ttagaacaag tcttgccata  
29521 agatttaaaa gcagttgata tttcaataag cttaggaaca acatggatac ctataaaata  
29581 ttacaaacia tttatagaag aaaccttaca aattactcct aaagattatg atttatffff  
29641 aatggaaaga acaggcgaat ggagtcttaa aggttttggc tattctttaa gttcttatat  
29701 tcgttcagaa tatgccacag aaagaatagg ttgctttgat ttgttgagac atggattatt  
29761 aagaaagcct attcgcattt atgataaaaa actagatcca tcaggaaaag aaatcagaga  
29821 attaaatcct aaagaaactg caatcgctaa ttctaaatta gaaaatftaa aaaatgaatt  
29881 tatagaatgg atttataaag actatgatag acgcacagat ttggaaaata tctataatga  
29941 aaggtttaat acaaatatag aaccacgata caatggagag catttagaac ttccaaatft  
30001 caatgccaat atcaaactca aaaaacacca aaaaaatgct atatataggg ctattcaaga  
30061 aaatagtatt atffffgatc atcaagtagg tgctggaaaa acttttagtgg caatftgctc  
30121 tgtgatggag caaaaaagaa tggggctfff aaataaaccc ctgattgtag tccctaatca  
30181 tttacaaga caatggaatg atgagtttta tcacgcctat acaaatgcaa acatfttagt  
30241 tgccacaaat gatgatftaa aaaaagataa tagagaaaag tttftftcaa agattgcaac  
30301 aaataatftt gatgccatca ttatgacaca ctcgcaatft aaattaatcc ctgcacctta  
30361 tgaagtcatg aaaaaacaat atgaagaaga tattaatatc ttagaacaaa cattagaaaa  
30421 aaaacaaaac gatgataatg ttatgcgata ttctgtaaaa gacttagaaa aacgcattga  
30481 aaatfttaag gtgaaattga gtgatttgca aactacacat aaaaaatcta aagcaataga  
30541 tftftcagaa ttaggaattg atgctftaat agttgatgaa gcacacgaat ttaaaatftt  
30601 actcattaca acttcaatgg gtgatataag tggctftggc aatfttaaaag gctcacaaaa  
30661 agcctatgat cftftattcta aaacacaata tattcacgag caaaataaaa aactctatftt  
30721 tftaacagga acgcctataa gcaattcaat tacagagctt tttaccttgc aaagatatat  
30781 acaaccaaft gtatftaaag aaaaagggat acaagctftt gactctftggg cftccactftt  
30841 cggtgaagtt acaaacgctt gggagcttga tagttctgga ataaattata aaatcgttgc  
30901 aagatftaac aaattcaaaa atgttctctga actfttctacc atgtataaaa gtgtggctga  
30961 tattgtaaca aataatgata ttatgaaata tcaaaaagat ttcgtgcaa agctfttaca  
31021 tgacaaacct atftaatatcg ttgctcctag aagtgaagaa atagcagaat ttataggcat  
31081 tcaagatgaa aatggaagat ggaatgaagg ctctattgtg tggagaatgg agcatcaaca  
31141 agatgatatt actagaaata acttacttgc ttgtaccaca gatgctagaa aagctggact  
31201 tgatftftaga cfttattaatc cacattgtga tgattatgca aatfttaaaa ttaataagct  
31261 tattgaaaat gftftftaatg agtataatgc ttggaatgat gataaaggca cacaatftaat  
31321 atftftgtgat ftatccactc caaaacaaca ctcaaaaaa gftftctftaa atagcaatat  
31381 tgctacacca aatfttaata aagaagaatt tgtcaatatt aatgaagcaa tagaacaac  
31441 agaagaagag aatagcaaaa gccttgatga actcttagca gaacaagcaa aatfttgatgt  
31501 atatactgat atctftaaaa aactftgtcgc aaaaggtatt ccacaaaatg aaatftcgtftt  
31561 cattcatgat gcaaaaaccg atfttacaana agggcaactt tftgcgata tgaattcagg  
31621 aaaagctaga atftftaattg gatcaacgca aaaaatgggt gctggaacaa atgtgcaaaa  
31681 aagaattgta gccttacacc atfttagattg cccttggcgt ccgagcgatt tagaacaag  
31741 aagcggtagg gttataagac aaggcaatga actctfttatg agagatccgc aaaactfttag  
31801 agtaaaaagag tfttagatatg caactgaaag aacctatgat gctagaatgt ggcaagtcatt  
31861 tgaaagcaaa gcaagatcca tagaacaatt tagaaaagct ggtgctgatg taagaacctt  
31921 agaagatgftt acaagtgggtg cagctgatgc tgcagaaatg aaagcagaag caacaggcaa  
31981 tccactcatt ftactacagg tgcaatftaa tagtgatcta agacaagaag aaatgctftta  
32041 tagtggfttat aaaagacaaa tacacaataa tgaagaaagt cfttataacca atctfttcaa  
32101 gattgaacta ctaaaaaaag atatatccaa aatggaaatt ttaaatftcaa tcaftaaaga  
32161 aaataatagc gagcattfttc aaggaaagta ftacatftaat gatgatgaaa aagatfttcat  
32221 tgtctftftaa aatgatacga gtgatctaaa caaaagcaga caagcagaac tftgaaagaaa  
32281 tftftgaaaa atftgtftaaa ccatagccga tgactatcaa aaagaatata aggtftftgga

32341 gttcaaagga ctgcttataa gtggagaaag aacagattta aacactctta atttttatgt  
32401 gagtactact gatggtaaaa caataatgga gcctgaaaat ttgatttata aaagagatga  
32461 aaaaaccttt tttaaattgg aaagtattgt aaattttggg ggttttgtaa agagattaaa  
32521 caatTTTTat aatgacttag aaaaatttac tcaactcaat aaaaataaga tagaaaatct  
32581 tgaaaaagaa attgtggagc taaaaagcat tacaggggat aacactccaa aatacaaaag  
32641 aaaggattat ttagaggcat taagagaaga taatcgcatt atcatggatg aaatagaaaa  
32701 aatgagtaaa caaaaaaact acaaaaagtga ttttTgcca aaatctgcaa agattttaga  
32761 agatttaaat aaacataatg aaattgaagt cttgtcaaga tagagtgtaa tcaaaaaatg  
32821 ccctaaaatt agcttattga tcttagggca gtattatttc tttttatctt ttttcatctt  
32881 ctaaaaaaaaa tttgctaata tcttTgttta tatcttttcg gtaattaaaa ccctcaagaa  
32941 caattcgtcc ttttttatca gaaatacaaa aaagtggctc tatgatctcg atagcatccc  
33001 atacaacca aatataagga aagaaacat tgtgtataat tctattgcac caatTTTTaa  
33061 ctagcataat cttatcaaaa tccacatttg aaggtaaact aaaatattgt ctatgatttt  
33121 cttttagctt attaagaact tcatgtaaTt ttatTTTTatg ctcttgtaa tcaaccaata  
33181 tcatccactt tatttttttc tctagtcca tacggattaa aaaagccttt ccaatgagag  
33241 aggtgtgaaa tgggtgtatac aattgcgaga atccaaatga attgcaaaat gattcttTgtg  
33301 gtgcaatata atcaccctaaa ccttTgtatgc tcccaattat attattgatt tccttaacga  
33361 tatactgcaa agactcatca attaatTTTT ctttTgtctt tatcgtatta taaaatctTg  
33421 ccatatcata aataatagtc tgcgttatta tctttTgtgg cataccta gcaatttccc  
33481 aaaatacaaa atacctattt atatttaccg attcaatggc tctataaatt gataaataat  
33541 ggcttttaTt atattcatca ttaaattgct ttggtTgctt aaaaatcaaa tcaaaactTat  
33601 catttattgt attttttttc ttgtataaac tatcttctaa taaatcaagt atattattca  
33661 aaattaataa attgTTTTct ttatctTgat atgttatttt ttcaagcatt tccattataa  
33721 ttctccttaa aaacctatat tataaaatat ataatgcgat atttatacta tgattctcta  
33781 taaatcacc atctctttca atctcattat tcctagcact tgtccatcgc aagctactat  
33841 cggttcgtcc tcgttttctt tgttTgaaact gattgagTgc attgatTgtc ataggcattt  
33901 gagttccttt ttggTcatga accatagact gtTcggcaa tattcgcata gagtctcttt  
33961 cttgggcagc atctcttcgg atagtTgatt tattactgag ctctTgtaag attctctgtc  
34021 tatattgTtt tgtataatct ctctcattat tttcctttat agtatatttt ggattattcg  
34081 cttcatctga ttgcaataac ttcaattctt tttctctacc taaaacagaa gcgtcccaaa  
34141 cagatttttt tgccatctTg gttacttcta caatcttacc gtttactttg actttttct  
34201 taatttgata agtttctTgt cctacaattt taaattttgc atattctcct tttaaaattt  
34261 tattttcttt aataactctt gctaaatctt tactccatat tgtagcaatt cttttttTgg  
34321 ttctatattt cacataaaaa ctatcttcag catttttatc taaactgaat ttatattttg  
34381 catctcata atctaaaact tgataataat gcatttttagt ttgttcttta tttttctcaa  
34441 gtttataaga tacttcatta tttttTgaac gaatagttgc tttTgcctcc acgcctaatt  
34501 cattcaatgc ttttgcaaaa gataatctta aattcattaa atctgttttt tttggattaa  
34561 ttcgtttgcc atttttatcc gcaactttca agcaaacatg gcaatgagga ttatcagtgt  
34621 cattatgaaa agcaattgca aaaaaattat ctggatacat tttttTtaat gtcattaaaa  
34681 ctgctttttt cattttttct ggtggagcat ttgtataatc ttgcatagaa aaaacatat  
34741 taatggatg tctttttctt tttttttctt gtccgaatct tgggatcgga gctccctcat  
34801 tttcataaat cttttttaaa aattttaact catctttgcc tttTaatgta tcaaaatcac  
34861 ttgtaattac atctactgtt cttctctTgT aaatataatc taaatgtttg caaactgctt  
34921 gcaaattctt tgaacctgat gtaattttaa caacaacctc agtatttttt tttaaaattc  
34981 tattcgTTTT atttgatgat ctattttTaa aatttatatgT agattttgag cctatttcta  
35041 ttttagtata aactcttttt gctatgattt catcatcaaa tattttTaat cttgacatta  
35101 aattctttca ttattttTaa taattatttt ttctagctct ttagataaatt tttcaatatt  
35161 taatgaaata tctttgaaag atttttctaa attgTTTTca tttattctta cacttttacc  
35221 acttcttaga atttttTaaa gctgataaat atttctacct attgtattta tttctgttct  
35281 tgtcagtatg aattcattta tatatttttt atcaaaaaac ttatcattat atatatgatt  
35341 taaagTtaaa attcttattt gtttagttgc tgtgccattc ccatttgatt ttgcaaaatc  
35401 tgaaaatatt ttatattctt ctctgtaag tttTaaatcta atctctttTg taggttcatt  
35461 tttttatgg tttattttat caaaattatt tatattttct ttttcatcat tgctgatgtt  
35521 tttTaaagata gtttttatta tcttactaaa agaagttttc atttcttttt tTaatccaac

35581 aagaaaagaa tagttttttt catcaaaata aatgacagtt tttttcatat aaattataac  
35641 accttttatt gagcctcgca gagaatattt cgctattttac ttaaaaaatg atgtcatttt  
35701 ttggagtaaa tagctatcct gctattatta cattttctaa acctatattt tagttaaatt  
35761 atctttatat aaaaattaat attttcaata tttatgatat aattaatata caaaaattta  
35821 taaggagtaa aatgaaaaaa gagagcaaag aaatagaatt gcttaagcaa gaatataaag  
35881 aaaaaatcca aaaggcaaaa caaaaagaaa aagataaaaa agaaaaactt tgcaagaagt  
35941 taggatctga aattatatat ttattagata atgatgattt tagaaattta ttttttgatt  
36001 atatacaaaa aaataattta gaaaagataa aatcattatg tagtgatatt gatgatttct  
36061 ttaatatata ttacattaaa aataaggagg atgaaaacga tcaagataaa taatattttt  
36121 aaaaaataat accccaaaac aaaaccaaaa aacaaaatta ttaaggatga aaaatggaaa  
36181 ataaagaaat gcaagaaat ataacatttg ataatatcaa agtaagaatt actgataatt  
36241 ctaagctatg taaagaatat caagaatgtg tttttaatgg aacatatgat aatacttcaa  
36301 atccaaaaga gatagaatct ctttttaata ctctaaagac ttttgattct tgtgagaaat  
36361 taaagcaaat agaaaattta tctttttcaa aacaagaaat tgattttgaa atcataacag  
36421 atgacttcaa aatacctcta aaagtaagac tgggagaagg acattttgaa aaagggttag  
36481 atgagttaat taaattaggt agtaaaaaata tcgacactaa cattaataaa aaaattaatc  
36541 ctgatataaa agagaaattt gacaaaatat tatctccact caaacctgaa aattttcaaa  
36601 acatttttaa tggaaccttt gaagtaatta aagaagctgg atctttgaca aatacgaatg  
36661 aatctcttag ttttattcaa gaatttttaa aagcttataa aaaaactcaa aaattatctg  
36721 aaaataataa aactatagat aatccaaaag aagataagaa aaaagacaaa aactattttt  
36781 taaaaaaggt tgatgaattt tttcaaaaaa agcttgattc tcgcaaggagg gagcatgttc  
36841 ggactaacga aaaatctttt tctaaatcaa tataaaatta aaaggattat tgatgtatag  
36901 tttaaacata ccctcagcca ttcaatcttt taacaagct ttggaagaag aaggattaat  
36961 tattgatggg tctcctatca tggatggcaa aattcataga gtaaaaacaa ctaatgataa  
37021 aggtagagaa ttaagtgggt cttatattgg atattttaa acataattttc ctgcaggatt  
37081 tgtgcaaaat tttaaaacag gcataaagaa aaattggaaa atgcaaatag aaaaaaatca  
37141 aagcaataat ataaaaagtc cgaaagaatt gcatgagcaa attaaaaaag atcaagagct  
37201 tagagaaaaa gaaatttttag ctttgcaaga aaaaaccgct ttaaaacttg aagatgagta  
37261 taataatgca agatgggcta attctaatac cgcttattta aagaaaaaag gctttgatga  
37321 aaacttttat cttaaacaag acaacaagg ttctttgctt attcctttta aagacgagaa  
37381 tggaaaatta tggctctgtcc aaagaatatt tccaaatgga gataagatta taggagtcac  
37441 taaaactcaa gaagaaaaag atcaaggcgt agaataatctt gcaaaaaaac aagggtgttt  
37501 tcatataata ggagctaaaa cactgcataa tttaaaagaa ttttatattt gcgagggttt  
37561 tgctactggg gctacattat ataaagcctt aaataaacct attattatgg cagtagatgc  
37621 aggaaattta gaaaatgtag taaaaaaatt aagcaccctt tattctgata gaaatattac  
37681 aatatttgcc gacaatgatc tcaaaaaaga attaaaaggc ttagaaaaata caggtaaaaa  
37741 aacagcttta gagattaag aaaaatattc taatgtaagt gtaattttac caaattttac  
37801 acaagagcaa agctctcaag gtatgagtga ttttaatgat ttaatgagtt taaaaggatt  
37861 ggaatttgta gcaaaaagaa ttaaaatgca gatgtttaga gaaaaagtag tgtgcttaaa  
37921 aaaagaaaat tctgacaagg aattaactag aggctaaaat ctctagttaa tatttgtttt  
37981 tagatattta tgttatatgt aattgatatt aggtagatat tttattatcc atcattttta  
38041 ttttttcttg ccaacatctc cgtaaaaaata ttatttgaac gaattttttc aatattatca  
38101 gaaggatttt tcttaaaagc ctcaatattc gtatctagca attttgtcat taactcaact  
38161 tgcttctcat ctgtttcata atttgctgac aaatctttga tctgatcttt atatctttca  
38221 aatgattttg ctaaagattc tttatgtgca tattcttggt caagtttgat atatttattt  
38281 aaattaatat ttgcaacagt agcagcccat ataaaagggg tattaatcat taatctaaca  
38341 atagctgaaa ctaaataat attattttaa tttttccaat caatagtgaa aaaattaat  
38401 attgccatac ataataattgc tccagcaaaa aaatataaat ttttattttt attatcatta  
38461 gcttgttcta cttgttttaa aaatccagct gcaagtcctg catcactaga taaatctata  
38521 actttttttg cttccacttc tacttttttt aattgctctt ttctctcttc taattctttc  
38581 tttaaagatt gaataattgcc atcatctgaa ccaaatacaa ttttataaaa atcatctaata  
38641 tctctttttt tcttttcaaa atcagtataa tttgaaataa atgtcttata ttttgaattt  
38701 tcttcattac ctattatttc agaataattg ctcaaaaaat catctatttt tctgttttaa  
38761 tcttctacct tatttaagtt ttcactattt ttcacaacaa ttaaatcatt ataaatattt



38821 ttaatttggtt catatttggtt caataaatca ccaggtatat ttcccttatac acttaaaaat  
38881 atttctgcat acgaattatt aatattatatt attttttgct taatatcatt tattatatta  
38941 tcagatgtaa cttcttgaat tcgtgttagt ctacttttac cactctgac attattcaac  
39001 aaataattat aagcttcatt taatttgat attctttctt gtatctctct ttctacttct  
39061 tgatagctat taatctcggtt attaataagt gatttcaaag aatcatcact actactatca  
39121 ataaatgctt tatttataga gtaatcgctc ttaagttgct cataaagctc ttttacctta  
39181 ttaatttctt cttgtaattc ctctaatttt tcatttttat ctttagacat ttttactcct  
39241 atttagtcaa ataagccact agcttttgct ttttcttcag cttgcttcatt aagctcgcca  
39301 taatccaaaa gctctttcca cattgatcta ctcatatctg ctttaaaagc attttcacat  
39361 cctacatatt cttttgatgt tttatctttt agcatagaat ctctattttc tttacaatat  
39421 tttaaaatac tttttaattc gagcatcctt ataatatatt ttaaggatat tgaaatgata  
39481 tctaataaat attaattaga tataaaaaata acaacatttt acttaaaaact taaatttttt  
39541 tatattttca gaattatfff aacataaaaat ttaattttata catttcattc tttggatttt  
39601 gattataata aaagttcaaa agtaatttta ttacttttga tttacattat ttgtaaatga  
39661 gcgtagcga aataaaaaata attgaattta tatttttggt ttcaagagta gattaagaat  
39721 aaaagattaa atagaaaatg cttctaaata cctataaaaat agttatttgt aaagggtttt  
39781 gattttccca cctgtgggag aaattttccc gcctgtggga gaaaaactgc tcgtgggtggg  
39841 aaaaaattaa gaagtaattt ttcccaaaat aattaataaa tttcatcata tgaattataa  
39901 tttgtgtttt tatttgggaa attatcattt tttgggaaaa atgtgttata atgtatttta  
39961 tttttgggaa aaaggttaat aatggcaaaa atagttaatt tagagaacag agatactaaa  
40021 aaattatata gtagtgttca ggaaaaaatt gatgctacaa ctggagaagt tactaccgta  
40081 ataagttctt ttttacaag agaaaaaact aaagatgatt ttattaaatt atttgttgaa  
40141 aatattagtt ttcttactga taatctttca aatcctgctt taagggttgt tttgatgatg  
40201 gttaaaaact taaattatca aaatgtcttt aactataata gcgattttgt tcattatttc  
40261 gaaagtaaaa agattttagg gaagtcgagt gtttatcgtg caataaaaga acttgaagac  
40321 aagcaagtta ttttaaaagt aacagaagaa caaagaaaag aatatgatata cataggttca  
40381 aattcatata ttatgaatcc gcagatcata ggcaaagggt cttttaaaga tcttaaaaaa  
40441 ttaagacaaa ctggtgttaa aacttttgat tttgataatt tagaatttaa acaagaaata  
40501 tcagttgaga gtgaatatga aggatttgaa caggttaaga aaaatccaga taattatggt  
40561 atcgaggaag tcaaacaaat agcctcaaat aagaatacaa tagaaaatca agttattatt  
40621 tctgaaaaag acaatgatca agattatcca aaagaagaaa taattgatgt taaagtggat  
40681 gataacaaag aagagcaacc tgctcttttt gttgaaaata aaaatgaaca aaacgcaaaa  
40741 gcttttatta atgaatttgc aggtatgttt aatggagctt ttcattccgag caaaacagtt  
40801 aaagaaatga aaaaagaatc ttttagagaat gattttaaag agggtaatat atgaaaaaag  
40861 ttttcttga tacaatatatt tttattgatt tttttgatga agcaagggtta aataatgagc  
40921 aagctaagca attaatatat tttttaatat caaatgaaat aaaaattgta ttttctgaag  
40981 atatgatttc aaccattgcc tatttaatag acaaaaacaa gttaccagct cttatgtcct  
41041 tttttaaaag tacaataaca aacctatatt ttgaaatagt atcgttcggg tcaagtgtta  
41101 ttaatatggc ttgtgatttt catttgcaaa ataaagggtga ttttgaagat tatttgaat  
41161 acttttgtgc agaaaaagaa aattgctgcg caatttatac tatggataaaa aattttccaa  
41221 atttaaaaat acctataaaa agatatggtg atacaaatat ataggggaat atcttgccaa  
41281 aaaaaagaat gtttttgttt gttccatatac aagatattca tgaagctaaa aaactcgggtg  
41341 caatgtggga taacaagcaa aaacaatggt ttgcacacaaa atcattggat attaatatat  
41401 tcaaaaaatg gctagataac aataaaaagta attcttattc aatcaacata ccctcagcca  
41461 ttcaatcttt taaacaagct ttggaagaag aaggattaat tattgatggt tctcctatca  
41521 tggatggcaa aattcataga gtaaaaaaca ctaatgataa aggtagagaa ttaagtgggtg  
41581 cttatattgg atattttaa aataattttc ctgcaggatt tgtgcaaaaat tttaaaacag  
41641 gcataaagaa aaattggaaa atgcaaatag aaaaaaatca aagcaataat ataaaaagtc  
41701 cgaaagaatt gcatgagcaa attaaaaaag atcaagagct tagagaaaaa gaaattttag  
41761 cttgcaaga aaaaaccgct ttaaaacttg aagatgagta taataatgca agatgggcta  
41821 attctaatac cgcttattta aagaaaaaag gctttgatga aaacttttat cttaaacaag  
41881 acaacaaagg ttctttgctt attcctttaa aagacgagaa tggaaaatta tggctgtcc  
41941 aaagaatatt tccaaatgga gataagatta taggagtcatt taaaactcaa gaagaaaaag  
42001 atcaaggcgt agaatatctt gcaaaaaaac aagggttgttt tcatataata ggagctaaaa

```

42061 cactgcataa tttaaaagaa ttttatatatt gcgagggttt tgctactggt gctacattat
42121 ataaagcctt aaataaacct attattatgg cagtagatgc aggaaattta gaaaatgtag
42181 taaaaaaatt aagcaccctt tattctgata gaaatattac aatatttgcc gacaatgatc
42241 tcaaaaaaga attaaaaggc ttagaaaata caggtaaaaa aacagcttta gagattaaag
42301 aaaaatattc taatgtaagt gtaattttac caaatttac acaagagcaa agctctcaag
42361 gtatgagtga ttttaatgat ttaatgagtt taaaaggatt ggaatttgta gcaaaagaaa
42421 ttaaaatgca gatgtttaga gaaaaagtag tgtgcttaaa aaaagaaaat tctgacaagg
42481 aattaactag aggctaaaat ctctagttaa tatttgtttt tagatattta tgttatatgt
42541 aattgatatt aggtagatat ttttaatcaa acaaagcatc aacttcttta tcatatTTTT
42601 ttctgagctc gccataatcc aaaggctctt tccccattga tttactcata tcagctctaa
42661 aagcattttt acattcctga tattccttttg aagtagtatt cttgaatata gagtctttat
42721 tttctttaca atattttaaa gtatctttta attccttttc atttttggct tctttaaaat
42781 attccataga cttaggctct gatgagcaag cacctaaaaa gacaataaga ctaaaagaag
42841 ctaaacctaa agtaatTTTT ttcattcgag catccttata atatatTTTA aatagtTTCg
42901 ttatatTTTA atgatattga aattatatct aataaatatt aattagatat aaaaatataa
42961 aaaattatTT gatgattTTA atgcgttcgg cgTTaaacca aattaaagca ttaatatccg
43021 agcattcgct tgtaagtatt tcaataatTT ctccagtaaa acctaaatca aataataaag
43081 gaaaatcgta aatctTTAat tgttgTgctt ctttgatgct gtttagggcta aaaatagaat
43141 ttaattcttc aaacaagaaa aactcacctt gTTTTgattg acaatattgg catttattca
43201 ttaaataaga acttccaact gtatttgaaa atgatttttc gagagatttt atattcatac
43261 gctttaagat gctagtaaaa tcttcagagt atgcagttat gtttctaatt attttaaat
43321 taggttgaaa gaaccattca ccttttctt tgtatataaa tttagagctt cctaaagcat
43381 aactgggtat aattttggag ctttccaac aattaataaa tccctgaaca atatttaag
43441 tttcagttac ataaaatgta aaatTTcat tctctaata attagtaata tagtttaaat
43501 ttttataatc ttgtaaatac caagttttat gttcttgatt ccattttatt ccatattctt
43561 tcaatttatc ttttctgaa taaggaatat taagttttat attcataaat tggccttaga
43621 taataaaaaac acttaataat taattacata tataaataat taatataaat tttataaata
43681 ttctgttaaa atttatcgtt cgttatTTTT taatTTTTTA ttctatcaaa aaaatactat
43741 gttttatctt aaaataatat tgaatTTatt acttgattta gtaatattta tgcacattct
43801 tggatattta aagaattaat tttgaaattg aggtttgtat cttttcaaca agtgagcata
43861 acccattgta atgagaaatt ttcttaatgt atctctatgc acacctattc tttttgctat
43921 ttttgaatgt gagtagcctt gcttatccca ttttaaaatt tgttttaatg ctggatagca
43981 tggatttact tcaattctat tttttttgcc tttgggacgc cctaagacaa caccttccat
44041 ttttttctt gctaaagcct ctttggttct ttgtgaaatc aactgccttt caatttcagc
44101 cgagagagag aaggcaaaag caattacttt tgtattaata ttatcattaa gaataaaatt
44161 ttctttaatt gaatatatag tgatattatt ttaatacac caatttaatt tttccataat
44221 atccaaaaga cttcttcaa gtcttgaaag ttctgtgaca accaaagaat ctccattttt
44281 tagtttttta aataatcttc ctaaatttct atgatcaatc gctatttttc cactaattac
44341 ttcttgaaca aagtaattga ttttaatttc atttctttta ctccattgaa gtatttcaaa
44401 tctttgattt tcagtgtttt gtttgTcggt gctaactctg atataggcaa aaatcattaa
44461 tattccttac aataaaaaat gaagaatggt ttataccaaa aaagataaaa aaattccacc

```

//

```

LOCUS      BDFJMB_2                1175 bp    DNA        linear        12-APR-2021
DEFINITION Campylobacter species strain strain.
ACCESSION
VERSION
KEYWORDS   .
SOURCE     Campylobacter species
  ORGANISM Campylobacter species
            Unclassified.
COMMENT    Annotated using prokka 1.14.6 from
            https://github.com/tseemann/prokka.
FEATURES   Location/Qualifiers
            source                1..1175

```

```

/organism="Campylobacter species"
/mol_type="genomic DNA"
/strain="strain"
gene 57..581
/locus_tag="BDFJMB_00047"
CDS 57..581
/locus_tag="BDFJMB_00047"
/inference="ab initio prediction:Prodigal:002006"
/codon_start=1
/transl_table=11
/product="hypothetical protein"
/protein_id="Prokka:BDFJMB_00047"
/translation="MDTLIQISNLYFTIGETAQYGFIDICPYHICSIGEFGNNGYGGTG
YYKNNYREIHVTKAYNNYPTMELYIFGFDTQDAIDSINKINFTYQPTYGGNTKYDMK
CLANSVGFASIGDGKSPQFSPNKWGVWLVDFGGLGHGNQCLAVTKKHNGIYTFKTVYK
GKTYTSILHLKLE"
gene complement(640..1152)
/locus_tag="BDFJMB_00048"
CDS complement(640..1152)
/locus_tag="BDFJMB_00048"
/inference="ab initio prediction:Prodigal:002006"
/codon_start=1
/transl_table=11
/product="hypothetical protein"
/protein_id="Prokka:BDFJMB_00048"
/translation="MEAKAFNQTLKASAKISVFQTRGILAHPTGNLNGGNGRTLLGT
NNGEDGQAFGSYSQYSIFTLTNHNGNFDLGIYGYQNTDVLNANIKVITYTPAYGGNQ
KWNLNYYINSKNYYLGNFNPFDMKHYTYLLFSNEEALIPTKQNNGIYKFEDLNKYI
KPTYLHLKLP"

```

ORIGIN

```

1 caccgtttaa taacgacatt aatactaata tcaaaagcct agggcaaagc ctagctttgg
61 atactttaat acaaatttct aatttgtatt ttactatagg agaaacggca caatatgggt
121 tcgatatttg tccatatcat atttgctcaa ttggagaatt tggcaataat ggttatgggt
181 gaacagggta ttataaaaac aattacagag aaatacatgt cactaaggct tataataatt
241 atcctacaat ggagctatat atttttgggt ttgatactca acaagatgct atagattcta
301 taaataaaaat aaattttact tatcagccta cctatggagg taatactaag tatgatatga
361 aatgtcttgc taatagtgta ggatttgcac cgataggtga tggaaaaagc ccacaatttc
421 cttcaaataa atgggggggtt tggtttagtcg acttcggagg tttaggacat ggcaatcagt
481 gccttgctgt tactaaaaaa cacaacggta tttatacttt taaaacagtt tataaaggta
541 aaacttatac aagtatttta catttaaaat taagtgaata atccttttagc ctataaaaaa
601 tcaaatttta tataggctat tttaaattcc attagatttt taaggtaact tcaaattgta
661 ataagttggt tttatatatt tattatttaa gtcttcaaac ttatatatac cgttgttttg
721 cttggttgga attaaagcct cttcattact aaataacaaa taagtataat gcttcatatc
781 aaaagggttg aaattgtttc ctaaataata attttttgaa ttgatataat aatttaaatt
841 ccatttttga ttaccccat aagcaggagt ataagttact tttatatttg catttaatac
901 atcattttgtg ttttgataac cgtaaattcc taaatcaaaa ttaccattat gatttgttag
961 cgtaaaaata gaataacctt gagagtaact gccaaaagcc tgtccatcct ctccattatt
1021 agttcctagc aaagtagttc ttccattacc tccgtttaaa ttccctgtag gatgtgctaa
1081 tattcccctt gtttgaata cactaatctt agcactagct ttcaatgttt gattaaaagc
1141 tttagcctcc acattaatgc tgttattaaa tgggtg

```

//

>>BfR-CA-15843\_min\_cov\_30 putative plasmid location

LOCUS IKNDEOKD\_1 19540 bp DNA linear 12-APR-2021  
 DEFINITION Campylobacter species strain strain.  
 ACCESSION  
 VERSION  
 KEYWORDS .  
 SOURCE Campylobacter species  
 ORGANISM Campylobacter species  
 Unclassified.  
 COMMENT Annotated using prokka 1.14.6 from  
<https://github.com/tseemann/prokka>.  
 FEATURES Location/Qualifiers  
     source 1..19540  
         /organism="Campylobacter species"  
         /mol\_type="genomic DNA"  
         /strain="strain"  
     gene 51..251  
         /locus\_tag="IKNDEOKD\_00001"  
     CDS 51..251  
         /locus\_tag="IKNDEOKD\_00001"  
         /inference="ab initio prediction:Prodigal:002006"  
         /codon\_start=1  
         /transl\_table=11  
         /product="hypothetical protein"  
         /protein\_id="Prokka:IKNDEOKD\_00001"  
         /translation="MTFGWGWFPYSLQPSYHEFKEMCKLNELPNDEHKYNKILSYFG  
         LSLDTLDWEELNERSLKLKIKGF"  
     gene 522..872  
         /locus\_tag="IKNDEOKD\_00002"  
     CDS 522..872  
         /locus\_tag="IKNDEOKD\_00002"  
         /inference="ab initio prediction:Prodigal:002006"  
         /inference="similar to AA sequence:RefSeq:AVS37480.1"  
         /note="DUF2974 domain-containing protein"  
         /codon\_start=1  
         /transl\_table=11  
         /product="hypothetical protein"  
         /protein\_id="Prokka:IKNDEOKD\_00002"  
         /translation="MNNKEQIKKLDNSELAWASYGYFDFIDKQYSFDEKDKDKFKTL  
         YAKINDLKKSDKQVNAKATYTDILNTECNLSLFSGDFSPLQAKQFFSRYDILLKHCNPNT  
         NSGFSATLFGKRRK"  
     gene 969..1529  
         /locus\_tag="IKNDEOKD\_00003"  
     CDS 969..1529  
         /locus\_tag="IKNDEOKD\_00003"  
         /inference="ab initio prediction:Prodigal:002006"  
         /codon\_start=1  
         /transl\_table=11  
         /product="hypothetical protein"  
         /protein\_id="Prokka:IKNDEOKD\_00003"  
         /translation="MTYILLIIISTILSYLILKFIYKIIIFKSTKSVSKFLVFLGSIG  
         LIIFYYTPYSYYLEPSYWQFRNMCKLNELPNNEEKYNKILGYFDKLDIDDFRHVKK  
         YGSIEMWLYIYDDTYKTPSNFQEKIEMDNIALKTKNMQMSLHKIVDMHISPYWNTRR  
         YVLEGNENMNFIEDELACGNLYQ"

gene 1548..1853  
 /locus\_tag="IKNDEOKD\_00004"  
 CDS 1548..1853  
 /locus\_tag="IKNDEOKD\_00004"  
 /inference="ab initio prediction:Prodigal:002006"  
 /inference="similar to AA sequence:RefSeq:AVS37480.1"  
 /note="DUF2974 domain-containing protein"  
 /codon\_start=1  
 /transl\_table=11  
 /product="hypothetical protein"  
 /protein\_id="Prokka:IKNDEOKD\_00004"  
 /translation="MTNKQLINKLRDMAELAQASYGYFDLVTHDKNDFFIKIKDEATE  
 SAFFNKHITQANVLDISYKNYKAYQYDSSLKKDIKIGTLNGDFSPLKPNNSFLAMIY"

gene 2265..2699  
 /locus\_tag="IKNDEOKD\_00005"  
 CDS 2265..2699  
 /locus\_tag="IKNDEOKD\_00005"  
 /inference="ab initio prediction:Prodigal:002006"  
 /codon\_start=1  
 /transl\_table=11  
 /product="hypothetical protein"  
 /protein\_id="Prokka:IKNDEOKD\_00005"  
 /translation="MGILKKVYIAWGVFWGIIFLSSLYAYFSDIEFFGDMLKIAFFI  
 YSYPLLPYISYLTQETIKSKNIFLYFSLFCFIFLYFALFFFISGGFFIYVIILGIYT  
 ILFLIISIKFRKELSYFSLFCIFLYIFLYLFIYIELKNE"

gene 2802..3020  
 /locus\_tag="IKNDEOKD\_00006"  
 CDS 2802..3020  
 /locus\_tag="IKNDEOKD\_00006"  
 /inference="ab initio prediction:Prodigal:002006"  
 /codon\_start=1  
 /transl\_table=11  
 /product="hypothetical protein"  
 /protein\_id="Prokka:IKNDEOKD\_00006"  
 /translation="MKILKSLYIIWMIFWGFMAILGYMGYDATFTKMFFFLVILYLF  
 PLLPYLHYLIYKKARNTKNIFVAICCY"

gene 3235..3561  
 /locus\_tag="IKNDEOKD\_00007"  
 CDS 3235..3561  
 /locus\_tag="IKNDEOKD\_00007"  
 /inference="ab initio prediction:Prodigal:002006"  
 /codon\_start=1  
 /transl\_table=11  
 /product="hypothetical protein"  
 /protein\_id="Prokka:IKNDEOKD\_00007"  
 /translation="MNTLKKIYIIWGMFWTIGLGIFVPTAHGFDSMDFVDFIFALQF  
 IAIIWLPPLLIFNIVYFVIKKERYIINTLWILLYPIALILYMFYHNSFYVTLYI  
 FLSLFK"

gene 3571..4017  
 /locus\_tag="IKNDEOKD\_00008"  
 CDS 3571..4017  
 /locus\_tag="IKNDEOKD\_00008"  
 /inference="ab initio prediction:Prodigal:002006"  
 /inference="similar to AA sequence:RefSeq:AAW35443.1"

```

/note="conserved domain protein"
/codon_start=1
/transl_table=11
/product="hypothetical protein"
/protein_id="Prokka:IKNDEOKD_00008"
/translation="MKEKIDKLRDYAELAQASYFYFDLKGYLQENETIVILNELVSL
SYNGKIAGKKEKVGQEYSFIGKGELNGEFGELQARNFSQRYEIKFHQSNTLSGFSATL
FYDKQKDEFVVGFRGTEGFWNMDTMQDITLSLNGNLQSSPLLEFLE"
gene 4470..5183
      /locus_tag="IKNDEOKD_00009"
CDS 4470..5183
     /locus_tag="IKNDEOKD_00009"
     /inference="ab initio prediction:Prodigal:002006"
     /inference="similar to AA sequence:RefSeq:APA47419.1"
     /codon_start=1
     /transl_table=11
     /product="lysozyme"
     /protein_id="Prokka:IKNDEOKD_00009"
     /translation="MQNLKLQIAQGLDKILEDEDRKQELYVCKFVVVNGVSENKIKAK
NKDVNIDNDTKNINTTKSNNISSENNAQEKITHLSNDGQNLKLNIEKLRPKPYNDQN
GKEITSYVKGATIGYGHLLIGQNEWDLYKNGITLQEADKLFKSDLLPFENAVKNSINSS
LAQNEFDALVILCFNIGIDNFKNSSVAKIINGEKTGYKTLKEAWMAWNKSQNKVMQGL
INRRNAEYKLYTQGGYEKW"
gene 5177..5536
      /locus_tag="IKNDEOKD_00010"
CDS 5177..5536
     /locus_tag="IKNDEOKD_00010"
     /inference="ab initio prediction:Prodigal:002006"
     /inference="similar to AA sequence:RefSeq:CKG86986.1"
     /codon_start=1
     /transl_table=11
     /product="hypothetical protein"
     /protein_id="Prokka:IKNDEOKD_00010"
     /translation="MVIFKNILLFLFFSTYLLAQEDFTPLEQCTYENEKFWIKILNLC
PEGNITCDKIVYGVNKNNGKYIVLNGKSISDVNMNFKGYVFKNDIYEYNIFFNFLYI
SKNKQIIQEYRLKLEK"
gene 5803..5904
      /locus_tag="IKNDEOKD_00011"
CDS 5803..5904
     /locus_tag="IKNDEOKD_00011"
     /inference="ab initio prediction:Prodigal:002006"
     /inference="similar to AA sequence:RefSeq:AAW35464.1"
     /note="conserved hypothetical protein"
     /codon_start=1
     /transl_table=11
     /product="hypothetical protein"
     /protein_id="Prokka:IKNDEOKD_00011"
     /translation="MFISSKTELIQTIKNSTINNKEVKQIDFIYPNF"
gene 7084..8214
      /locus_tag="IKNDEOKD_00012"
CDS 7084..8214
     /locus_tag="IKNDEOKD_00012"
     /inference="ab initio prediction:Prodigal:002006"
     /inference="similar to AA sequence:RefSeq:ALW56279.1"

```

```

/codon_start=1
/transl_table=11
/product="integrase"
/protein_id="Prokka:IKNDEOKD_00012"
/translation="MKNLVKLKEYKGIYFIDKDKKLEDIKEISLVELQRRLTIPYELA
IRYEGKSSYEIFPILNNTQTLKKNCELIALQRINGKFAKKFKIKEPKLNEVFEEWI
SMRKNITISKKHYEVTIFSYNAHIKDVIGNIKIKQVCLKDMQNIVNKMIDQGKSPRTTK
TIKDILSPVFFAIKNDYIEKNIAREIEIQKFDNKRYFTIDDEDRNALYKAIINYENL
MIRAMFIFLLHGRRKSEVLTWKWDNIDFANKIYFLPSNQNKSRKNLQFPLSSLQIEAL
KNIGVKNKGYIFIKEDGNPYKDIRWHWDKINQKLKTPIRLHDLRHLIGYIGINMGISL
EAIGETLGHSSIGVTKRYANIKNETINNTLNAIFSNFKTEKH"
gene      complement(8260..8538)
CDS       /locus_tag="IKNDEOKD_00013"
          complement(8260..8538)
          /locus_tag="IKNDEOKD_00013"
          /inference="ab initio prediction:Prodigal:002006"
          /codon_start=1
          /transl_table=11
          /product="hypothetical protein"
          /protein_id="Prokka:IKNDEOKD_00013"
          /translation="MNMDNIIICKASDLEDIFKKILKENELIKNKTDENLNVQASNY
LKISISKLYKDCNLGKIPFYKIGKLVFKKNDLDEYLFNSSKNSLKF"
gene      8908..9597
CDS       /locus_tag="IKNDEOKD_00014"
          8908..9597
          /locus_tag="IKNDEOKD_00014"
          /inference="ab initio prediction:Prodigal:002006"
          /codon_start=1
          /transl_table=11
          /product="hypothetical protein"
          /protein_id="Prokka:IKNDEOKD_00014"
          /translation="MFGRNLKKIRKASGLTQLELAKILNTTQRTISLWETGSFEPPLN
TILLLCNIFKVTPNELLLEGCFDDDDNEYLAHHIVRLTKELNCKTYTKRFLNHFVLYRLE
LKKLTSHLQKFKGDSFAKKLAHSWTGKGERMLLVFYFYIEYLEKYINENNIDKNSFL
KLLNDFNISKDNTNTIHCFILKEKDKRNLIEWVEKEMQFEIKVLVAMLKDEIKTLVK
NEINMLNKLLV"
gene      9879..9983
CDS       /locus_tag="IKNDEOKD_00015"
          9879..9983
          /locus_tag="IKNDEOKD_00015"
          /inference="ab initio prediction:Prodigal:002006"
          /inference="similar to AA sequence:RefSeq:APA79438.1"
          /codon_start=1
          /transl_table=11
          /product="TraG-like protein"
          /protein_id="Prokka:IKNDEOKD_00015"
          /translation="MGVNPSSYIMQDASKSGNELAKEAQGLFDAMRKK"
gene      complement(10004..10324)
CDS       /locus_tag="IKNDEOKD_00016"
          complement(10004..10324)
          /locus_tag="IKNDEOKD_00016"
          /inference="ab initio prediction:Prodigal:002006"
          /codon_start=1
          /transl_table=11

```

```

/product="hypothetical protein"
/protein_id="Prokka:IKNDEOKD_00016"
/translation="MDKAEVKLKKSKMTTTEKLILALWLSCGVAIVLVLVYVKIITS
LIGILGLLSVSSLVIAFVLF LAKNIKIVPYDEKKHRRKSKIAGYIESDSRKYDYIFPS
IRDN"
gene      complement(10446..11117)
          /locus_tag="IKNDEOKD_00017"
CDS      complement(10446..11117)
          /locus_tag="IKNDEOKD_00017"
          /inference="ab initio prediction:Prodigal:002006"
          /codon_start=1
          /transl_table=11
          /product="hypothetical protein"
          /protein_id="Prokka:IKNDEOKD_00017"
          /translation="MQEKEEKYIQLYKTQDKVLDLVAKEKLDLYLTGGTALQRFHYNQ
FRFSDDLDFLINNGIKNHTPKFENDFASMLQDNNIDFEIKVSNQYFTQLYIKENNLK
IDLVNDYVFHEKNDYVKLENGLLIDSIQNIQNFVNKLETSISRDEPRDLFDIYITILRNSK
IDIEKSFIDLDKKTNIIEPKDIINKLKNIKLEQIQYNKINTKSDFIICKDFLQNFHKSID
ENFNS"
gene      complement(11080..11412)
          /locus_tag="IKNDEOKD_00018"
CDS      complement(11080..11412)
          /locus_tag="IKNDEOKD_00018"
          /inference="ab initio prediction:Prodigal:002006"
          /codon_start=1
          /transl_table=11
          /product="hypothetical protein"
          /protein_id="Prokka:IKNDEOKD_00018"
          /translation="MKKDKMQIAEHILQNCYWGNTTMTSPFIVEHINDKDFARTIFSA
IFQNSLTMFEDLKIIDNEEWIKEFIISQNRQLGYHKRFYEEERLDELIAHYGIKDAGK
RREVYPIV"
gene      11879..12379
          /locus_tag="IKNDEOKD_00019"
CDS      11879..12379
          /locus_tag="IKNDEOKD_00019"
          /inference="ab initio prediction:Prodigal:002006"
          /codon_start=1
          /transl_table=11
          /product="hypothetical protein"
          /protein_id="Prokka:IKNDEOKD_00019"
          /translation="MQSYSPSAASTIHKGNVGTVDSSAVGFGNNYEADKKTMGNGHL
DFAGQNTAWGQNSQGTVQQEVQGVANATNQFSKDAPKRTVDDGVNVAEMAVNGAKG
SFKNTVNAVGTITQTAINNPSHLLDSNFWIGARDANGNLIQPSNSGGNNSAPSSIPPA
PKIPSN"
gene      complement(12538..12981)
          /locus_tag="IKNDEOKD_00020"
CDS      complement(12538..12981)
          /locus_tag="IKNDEOKD_00020"
          /inference="ab initio prediction:Prodigal:002006"
          /codon_start=1
          /transl_table=11
          /product="hypothetical protein"
          /protein_id="Prokka:IKNDEOKD_00020"
          /translation="MDKAVNIKLKIIFAVLFVLILTNIIGILFISKNEIFTKTLVGLIA

```



IAFILYYALAWIKTIKSIKDKSSKSGVKNLFIGILKLPYELVKVVLKIIKKTFSFFFGLIDACVDDTVKSRNNKHYDPSFINAEGIGELYTQNKKGKVVFFN"

gene complement(13574..14446)  
/locus\_tag="IKNDEOKD\_00021"

CDS complement(13574..14446)  
/locus\_tag="IKNDEOKD\_00021"  
/inference="ab initio prediction:Prodigal:002006"  
/inference="similar to AA sequence:RefSeq:CKG86076.1"  
/note="Domain of uncharacterised function (DUF3825)"  
/codon\_start=1  
/transl\_table=11  
/product="hypothetical protein"  
/protein\_id="Prokka:IKNDEOKD\_00021"  
/translation="MTESGFNLEKDENEPSLVYVKKATTRNKTNLNREIQNKVEEKPL  
LFQFAYFPNFLTQELSNIAQKEFWGSGNNILFSYLFKYFEFIHENKNYPDIITYNK  
DKTKACFNTGLYSTGVFPIFAYFEKQENGGYIFRKFCNGDRVLDLEIPKSLNDFDS  
FKNELIFDSKLDLRINHLHLFERKERLPEIIKLNDRFIGHIINGELKIIKDNYNHQK  
MIIPAAYKQKVLYIPLKLQEEVDITVVVEKEEVKNEQYYAVRTILNPHDNIYKTAR  
VLSIVESEWVKNTI"

gene complement(14582..15013)  
/locus\_tag="IKNDEOKD\_00022"

CDS complement(14582..15013)  
/locus\_tag="IKNDEOKD\_00022"  
/inference="ab initio prediction:Prodigal:002006"  
/inference="similar to AA sequence:RefSeq:ABS43376.1"  
/codon\_start=1  
/transl\_table=11  
/product="putative thioredoxin"  
/protein\_id="Prokka:IKNDEOKD\_00022"  
/translation="MILKKIKILFLAIFLAFSPMTLEAKIYDNVYAAQKQALKEAKLM  
VFFVLSNTCNYCHKLMSDALNNRDLMEYLDENFIVAISDLNADGLIPRDLNFNGVTPT  
TYILTPTGKVIPTPIEGAVDSNMLFGLLKGLEDYKKGQLGF"

gene complement(15026..15808)  
/locus\_tag="IKNDEOKD\_00023"

CDS complement(15026..15808)  
/locus\_tag="IKNDEOKD\_00023"  
/inference="ab initio prediction:Prodigal:002006"  
/inference="similar to AA sequence:RefSeq:SQE23558.1"  
/codon\_start=1  
/transl\_table=11  
/product="TraT complement resistance protein"  
/protein\_id="Prokka:IKNDEOKD\_00023"  
/translation="MKINKSILKMGLSSILAASLLTGCLTTTLQTNATMSQSIFLDPV  
AKEKRVVFLNIKNTSGHEVNLEPKLRSALETKGYKIIDDPKATYILSTNVLYCDKKQ  
ENNVAGGAVAAGATGAAISGYNGGGAGGMVAAGAAGALVGGLLGKLTEDTIWQMQVDI  
NIKQKADGKVL TSSGNVSGQASVRDQRASGF LNSFGGSVRS DKVQGLNSNQINSTQQT  
YEGKYIEKNSIIFAEAVKTGLKLPEATPILENKIATQIAGLF"

gene complement(16202..16330)  
/locus\_tag="IKNDEOKD\_00024"

CDS complement(16202..16330)  
/locus\_tag="IKNDEOKD\_00024"  
/inference="ab initio prediction:Prodigal:002006"  
/codon\_start=1  
/transl\_table=11

gene /product="hypothetical protein"  
/protein\_id="Prokka:IKNDEOKD\_00024"  
/translation="MKKQIIGSILLCSSLFAYKSTKDLKNDVLEKLIQNINDSLY"  
complement(16351..17010)

CDS /locus\_tag="IKNDEOKD\_00025"  
complement(16351..17010)  
/locus\_tag="IKNDEOKD\_00025"  
/inference="ab initio prediction:Prodigal:002006"  
/inference="similar to AA sequence:RefSeq:ARJ53355.1"  
/codon\_start=1  
/transl\_table=11

gene /product="transcriptional regulator"  
/protein\_id="Prokka:IKNDEOKD\_00025"  
/translation="MYIRDFRKRLHMTQSEFAQALGKQTNISMYEKHRVKPTCELV  
KLIIRFNANPNFLFFGKEPHLNTDTFKNEISQELSQLISELSLYENEENIIVLEENKA  
LGKILSLVPNKEIWERLFFLFRINRKLHFVTSFICRVAKRLKQRDDEAKAYLISIINS  
FNEGDFTELNEYIKLDLIALFDEKITEEEAKTIIEDCLVVFKHIENTAPIHKMVELGK  
D"

gene complement(17024..17200)  
/locus\_tag="IKNDEOKD\_00026"

CDS complement(17024..17200)  
/locus\_tag="IKNDEOKD\_00026"  
/inference="ab initio prediction:Prodigal:002006"  
/inference="similar to AA sequence:RefSeq:ARJ53354.1"  
/codon\_start=1  
/transl\_table=11

gene /product="conjugal transfer protein TraU"  
/protein\_id="Prokka:IKNDEOKD\_00026"  
/translation="MPIWRKSSYRLQILAPVPHPMGMGIGQSGILWSYAKNYPVAGDN  
FTFMLFKKKECCAF"

gene complement(17221..17415)  
/locus\_tag="IKNDEOKD\_00027"

CDS complement(17221..17415)  
/locus\_tag="IKNDEOKD\_00027"  
/inference="ab initio prediction:Prodigal:002006"  
/inference="similar to AA sequence:RefSeq:ARJ53354.1"  
/codon\_start=1  
/transl\_table=11

gene /product="conjugal transfer protein TraU"  
/protein\_id="Prokka:IKNDEOKD\_00027"  
/translation="MIATLIDAACMNITGGVDIAYMTEVDPLWQDDELTA LINPEALL  
FGNPILNLACMADSASAQGN"

gene 17808..18128  
/locus\_tag="IKNDEOKD\_00028"

CDS 17808..18128  
/locus\_tag="IKNDEOKD\_00028"  
/inference="ab initio prediction:Prodigal:002006"  
/codon\_start=1  
/transl\_table=11

gene /product="hypothetical protein"  
/protein\_id="Prokka:IKNDEOKD\_00028"  
/translation="MDKAEVKLKKSKMTITEKLILTLWLSCGVAIVLLLVYLKIITS  
FIGILGLLSVSSLVIAFVFLAKNIKIVPYDEKKHRRKSKFAEYMSSGRCKYYHIFGA  
IRDN"

```

gene      18363..18923
          /locus_tag="IKNDEOKD_00029"
CDS       18363..18923
          /locus_tag="IKNDEOKD_00029"
          /inference="ab initio prediction:Prodigal:002006"
          /inference="similar to AA sequence:RefSeq:ABS43512.1"
          /codon_start=1
          /transl_table=11
          /product="helix-turn-helix domain protein"
          /protein_id="Prokka:IKNDEOKD_00029"
          /translation="MKRLSVKGNKGNKKTQIMEILSIQVKENLPSKVVASRYDIT
LQTVYKWRKKYTKYLENYEKVKQEAEEKTLKESDLENEHIHISDCAKRLRTLRIALNL
SQQRIANILGISQALYVRFKGYGQLNSFMIKKLYKTLGINPIYLICGEGDCFLIKDI
DLFERINNEQKKYKNQLEQENILNY"
gene      19205..19360
          /locus_tag="IKNDEOKD_00030"
CDS       19205..19360
          /locus_tag="IKNDEOKD_00030"
          /inference="ab initio prediction:Prodigal:002006"
          /inference="similar to AA sequence:RefSeq:ABS43172.1"
          /codon_start=1
          /transl_table=11
          /product="single-strand binding protein family protein"
          /protein_id="Prokka:IKNDEOKD_00030"
          /translation="MKFLDSKPADNNQSGNPYGNVQATPEPVNQSVQKQVPIHQFEEQ
QGEDLPF"

```

ORIGIN

```

1  ttctaaaaat atcaagtttt attctacttc ctttgataat tatatggaat atgacatttg
61  gttgggggtg gtttgtgcct tatagcctac aaccgagtta tcacgaattt aaagagatgt
121 gtaagcttaa tgaacttcca aatgatgaac acaaatataa taagattcta agttattttg
181 gattaagttt ggatacattg gattgggagg agttgaatga gagatcgttt aagttgatta
241 aaggttttta atgcagatta tgttaaaagc aagttagaat acagagcaaa ggtcacagca
301 attcgaaaaa aacgctataa tttttcagtt gatttgtttg ccaataacaa aggattatca
361 aaggagaata taacttcat tcaaatatac ggtacttgga acacaaatcg ctatttttta
421 gagcaaaaaa gtatggcaag ttataatcct gtatggcgtg aaaaagaatt aagttgtact
481 gatattgcac cttgaaata tgactatgca gaaaggataa aatgaacaat aaagaacaga
541 ttaaaaagct taaagacaat tcagaacttg cttgggctag ttatggttat tttgacttta
601 tagacaagca atatagcttt gatgaaaagg ataaagataa gtttaaaact ttatatgcaa
661 aaataaatga tttaaagaaa agcgatgaaa aagtacaaaa tgccaaagct acctacaccg
721 acatttctca cacagaatgc aactctttat ttagtggcga cttctcccca ctccaagcta
781 aacaattctt ttctcgctat gatttattaa aacattgtcc taatacaaat tcagggtttt
841 ctgctacttt gtttgagaaa aaaagaaaat aaatttatag taaaataaaa gaaaaagtta
901 tactgctgaa tataacttat aaactatatt ttaattttta taaaatagag agtctaagga
961 gataacccat gacatacata ttacttctta ttataatttc tactattctt tcttatctta
1021 tattaaaatt tatttataaa atcatcttta aatctacaaa aagcgtttca aagtttttag
1081 tctttcttgg aagcataggt ttaattatct tttattatac tccttattct tattatttag
1141 agcctagtta ttggcaattt aggaatatgt gtaagttaaa tgaacttctt aataacgaag
1201 agaaatataa taagattcta gggatttttg ataaaaagtt aggtgacata gatgattttc
1261 gacatgtaaa aaaatatggg agtatagaaa tgtggcttta tatatattac gatgatactt
1321 acaaaactcc ttcaaatttt caagaaaaga tagagatgga taatattgca ctaaaaacaa
1381 aaaatatgca aatgtcttta cacaagattg ttgatatgca tataagtcca tattggaata
1441 ctagaaggta tgtgttagaa ggcaatgagg gtaatatgaa ttttgagttt atagaggatg
1501 agctcgcttg tggcaatctt tatcaataat aatataagga ataaataatg accaataaac
1561 aacttattaa taaactaagg gatatggcgg aacttgcaca ggcaagttat ggttattttg

```

1621 atttggtaac acatgacaag aatgattttt tcattaaaat taaagatgaa gctacagaat  
1681 ctgcttttct taataagcat attactcaag ctaatgtctt agatattagt tataaaaatt  
1741 ataaggcata tcaatatgac tcactcttaa agaaagatat taaaattggc actctcaatg  
1801 gcgacttctc cccactcaag ccaaacaatt cttttctcgc tatgatttat taaaacattg  
1861 tcctaacaca aattcagggt tttctgctac acttttttat gacattcaaa aagatgagta  
1921 tattgctagt tttcgaggaa cagaaggaat tgtaagtatg gatgcatttg tgccgatata  
1981 ggacttactt ttggtaaagg agattttcaa gctaatacct taaaacaatt tttattagat  
2041 atagcaccta ttttaaataa tatagattct agtaaaatta cttttgtagg acattctctg  
2101 gtggatattt agctcaaag gctttgatat atattgtgat taaatataaa gatttatact  
2161 ttttaatactc ttagtattta cgtttgaaat gttcctagtg tggttatatt ttgattttta  
2221 aaaaagtagg ataattttat taaaaatatt aaaaaggaaa ataaatgggt atattaaaaa  
2281 aagtatacat tgcttggggg gtcttttggg gaattatttt tttgtttagt tctttatag  
2341 cttatttttag tgatatagaa ttttttgggtg atatgttaaa gattgcattt tttatatatt  
2401 cttatccatt gttgccttac atatcatatt taacactaca agaaactatt aaatcaaaa  
2461 atatttttct ttatttttct ttattttgct ttatttttct ttattttgct ttatttttct  
2521 ttatctcggg aggatttttt atttatgtaa taatattagg tatttataca atattatttt  
2581 taataatatac tattaatttt agaaaagaac tttcttatta tttttcttta ttattttgta  
2641 tttttttata catttttttg tatcttttta ttttttatat agaattaaaa atgagagtaat  
2701 aaagctcaaa ttaacaatct caaaaattac gctaaacttg tatagattgg ttttttfaat  
2761 tttttaataa taatttfaat ttcaacaaaa aaggaagtag tgtgaaaata ttaaaaagtt  
2821 tatatattat ttggatgata ttttggggat ttggggctat tttaggttat tatatgggat  
2881 atgatgcaac ttttactaaa atgttctttt ttcttgttat attatatctt tttccattgt  
2941 tgccttattt gcattatttg atttataaaa aagcaagaaa tacaaaaaat atatttgttg  
3001 ctatttgttg ctactattga ttaatagaaa taatagtaat tttgagctgt acttaattat  
3061 tattgtgata catattataa ttttgcaat aatttattta attaaaagaa ataaaaatga  
3121 aaactcaaat caataattta agagattatg tagaactagc ttgggctagt tatttttatt  
3181 ttaattttta aaaaagtaga agaattttac taaaaatatt aaaaaggaaa ataaatgaat  
3241 acattaaaga aaatttatat catttggggg atgttttgga ctattggact tggaattttt  
3301 gtgcctacag cacatggatt tgatagtatg gattttgtgg attttttcat atttgcttta  
3361 caatttatag ctataatttg gttgcctcca ttactcattt ttaatattgt atattttgtg  
3421 ataaaaaaag aaagaaaata tattataaat acattatgga tattattgta ttatcctata  
3481 gctttgatat tgtattacat gttttattat cataatagtt tttatgttac attatatatt  
3541 tttttatcat tatttaataa aaggataatt ttgaaagaaa aaatcgataa gctaagagat  
3601 tatgccgagc ttgcacaagc tagttatttt tattttgatt taaagggtta tatattacaa  
3661 gaaaatgaaa ctatcgttat tttaaatgag cttgtaagtt taagttataa cggaaaaata  
3721 gctggaaaaa aagaaaaggt cggacaagaa tatagtttta ttggcaaagg tgaattfaat  
3781 ggagaatttg gagaattaca agctagaaat ttctctcaaa gatatgagat taaatttcat  
3841 caatccaaca ctttaagtgg tttttctgct actttatttt atgataaaca aaaagatgaa  
3901 ttcgtggtgg gatttagagg aactgagggt ttttgggaata tggatacgat gcaagacata  
3961 actctatctc ttaatggcaa tctccaatct tctcctcttt tagaattttt agaataagta  
4021 gataaaatca tcaaaaatga aaataaaagt atcatatttg tagggcattc atttgggtgag  
4081 atttgggaga tgcaatgaaa atattaaaaa tactttatat ttgctggatt atatttttta  
4141 tctttgcttg gataatatca ctttaatttg ggcataatcc agatagattt aaggaatttc  
4201 tcatagtgat tggatggata attttgctc caatagtgaa caatctatgg ttatttttaa  
4261 taacaagaat taaaaaatat ttgataaggt tttttctatt attgtttatat tgtccattgg  
4321 caattttatt atatcttata tttgattaaa aggaaaaaat atgaagctat tttacacagc  
4381 tacatgaata tgataaaatc attaaaaatt ctttagaaga taagaaagaa ttaaacgaat  
4441 atcatttaac ttttttaact cctgcaaaaa tgcaaaattt aaaacttcaa atcgacaag  
4501 gattagataa aatcttagaa gatgaagata gaaaacaaga gctttatggt tgtaaatttg  
4561 tgggtggtaaa tgggggttagc gaaaacaaaa taaaagcaaa aaataaagat gtaaatatag  
4621 ataatgacac aaagaatata aacactacaa aaagcaataa tataagttct agtgaaaaca  
4681 atgctcaaga aaaaatcact catctaagca atgatggtca aaatctttta aaaaatatag  
4741 agaagctaag actcaaacct tataatgatc aaaaatgaaa agaaattact tcatatgtta  
4801 aaggtgcaac tatcggatat ggacatctta tagggcaaaa tgaatgggat ttgtataaaa

4861 atggtattac tttacaagaa gcggataaat tgtttaaaag cgatttgтта ccttttgaaa  
4921 atgctgtaaa aaattcaata aactcttcct tagcacagaa cgaatttgat gccttggtta  
4981 tattatgttt taatataggg attgataaatt ttaaaaattc ttctgttgct aaaatcatca  
5041 atggagagaa aacgggttac aaaacattaa aggaagcttg gatggcgtgg aacaaaagtc  
5101 aaaataaagt aatgcagggg ctaattaata ggagaaatgc tgaatataag ctttacactc  
5161 aaggaggтта tgaaaaatgg taatttttaa aaatatatta ttgtttttat tttttagtac  
5221 ttatttgтта gcgcaagagg attttactcc actagagcaa tgtacctatg aaaatgaaaa  
5281 gttttggata aaaattttaa atctatgtcc agagggtaat ataacttgтg ataaaattgt  
5341 atatgtgggt gtcaataaaa ataatggaaa atatatgtc ctaaattgгta agtctattag  
5401 tgatgтаааt atgaatttta aaggatatgt ttttaaaaat gatattttatg aatacaatat  
5461 ttttaataat tttttatata tttctaaaaa caagcagatt atacaagaat atcgtctaaa  
5521 attatgtgaa aaatagacac aacaaaggca acaagcaaca acaaatacct agaatatgта  
5581 aaaagttaaa aagatgcaat aagaattaca agaagttttt aaagttataa aaatcctaаt  
5641 таatgaaatc ttagctccta aattttataa caaatacaaa gatttagaag tagagattga  
5701 tgataagggt aatattataa gatggatagg agagattaat aaagacaaaa aatattagca  
5761 aataaaaaat gatataataa tgctttatat aaggaatctt ttatgtttat aagttctaaa  
5821 acagagttaa ttcaaactat taaaaattca acaatcaaca ataaagaagt таaacagatt  
5881 gattttattt atcctaattt ttaaagaatg atgaaaatct таatacttct tttactaatc  
5941 ttaatgcttt aaaattagct ttagaagaaa agaattttta tcttaatttt atagacttaa  
6001 acagcaaaга aagtctttta agtttttata atcaaaataat aagтаатаat catcttagaa  
6061 attattttta ttttaaggat aatcaatttt ttattaaaaa agatataaaa aataaaattt  
6121 tatttcatag tattcactct tcttctattg таagтаatta tcttagcttg ttaaаtgatt  
6181 tтааtacttt aaacaagata gaactcataa aaatattaga aagtttaagt ttgtataacc  
6241 tttcaacttt aatgcaaact atgcaatcaa aaaatgaata tgactcaaaa ggctttgata  
6301 aagatggтat ctttttatct aatatgatta tgaatgtgag attgaaataa gтаaatgata  
6361 gatttagcag gtgtgatttg tтаatgaaaa tatacatctc caattgattt gaaaaaatag  
6421 caaggtttta aaaaagcaat acaagagaga aaatttaaag aatttgggта atgcaattga  
6481 atgcaactag attttagtag atataaattt aaataaaaatt tatcaagaag ttttttctat  
6541 aaagactatg cattttttta aaaaaagtat ttttaacca aagtttttac tatgataata  
6601 aaacctatta tttaagaaat таaacttaaa aatgaaaatt tgattatcaa agttcctagt  
6661 gatttttcaa agcttttagaa gatattataa aactcacata gtataatcag gaagctattt  
6721 ttgaaaatat aaaaactctt ttttaagatt tтаatataaa ttgcaaaaaa атаacacttg  
6781 agagtaaaaa aaacaaatgg tgcctgaggt cggactcgaa ccgacacaag gttgcctta  
6841 ccagattttg agtctaатgc gttttgttat cattttttat caaagtattg aaaaataggt  
6901 attttattgt tтаagtttat cttaaaaaata gcattatttt ataccatttt gagaaaaaaa  
6961 ccgctaccaa aaccgctacc actaaaatcc atttgagata ctatttttag tatattttta  
7021 attttatatt atgтаaaaaa таataaaatt ttctgcgтаa attaaaagca aaaaaggaat  
7081 atcttgaaaa atctagтаaa actaaaagaa tataaggгta tatattttat agacaaagat  
7141 aagaaattgg aggatataaa agaaattagc ttagtagaат tacaagaag атаactata  
7201 ccatacгаat tagctataag atattatgaa ggaaaaaaat caagtтatga gatatttcct  
7261 attttaataa aactcagac ctttaaaaag aattgtgagt таattgcctt gcaaaгаatt  
7321 aatggaaaat ttgcaagaa atttaaaatc aaagaaccta aactaaatga agtgtttgaa  
7381 gaatggatta gtatgcgaaa aaatactatt tctaaaaaac attatgaggт aaccatattt  
7441 tcatataatg cacatataaa agatgttata ggaaacatca aaataaaaca agtcaaatta  
7501 aaagatatgc aaaatattgt caataaaatg attgatcaag gcaaатctc aagaacaaca  
7561 aaaacaataa aagatatact ttctccagта tttgaatttg ctattaaaaa tgattatata  
7621 gaaaaaaata tagcaagaga aatagagata caaaaatttg атаcaaaaag atattttact  
7681 attgatgatg aggatagaaa tgctctttat aaagctatta таaattatga aaatttaatg  
7741 атаagagcta gttttatatt tcttttacet ggaagaagaa aaagtгаagt tcttacatta  
7801 aatgggгaca atattgactt tgctaataaa atttattttt taccttcaa ccaaaaacaa  
7861 tcaaggaaaa acttacaatt cccgttaagt tctttacaaa tagaagcttt aaaaaacatc  
7921 ggagtaaaaa атаaaggata tatttttatc aaagaagatg gaaaccctta таaagatata  
7981 agatggcatt gggataaaat aaatcaaaaa ttaaaaactc ctatttagatt acatgactta  
8041 agacatttaa taggatatat aggtattaat atgggtatat ctttagaagc tattggagaa

8101 acattaggac attcaagcat aggagttaca aaaagatatg caaatattaa aatgaaact  
8161 attaataata ctctaaatgc ttttttagt aattttaaaa ctgaaaaaca ctaatttaca  
8221 atggtttttt aggtttttcg gtttttagt taagtgtgat taaaatttta aactattttt  
8281 agaactgtta aattttaaat attcatcaag atcatttttt ttaaaaaaca gttttttgcc  
8341 aattttataa aaaggaatth ttcctaaatt acaatccttg taaagttttg aatgcttat  
8401 ttttaaataa tttgaagcct gttgtacatt taaattttca tcagttttat ttttgattaa  
8461 ttcattttct tttaaaatct ttttaaagat atcttcaaga tcactagctt tgcaaattat  
8521 tatattatcc atattcatta tttttcctca ttttttaagt aataataaat cgaattgtta  
8581 tcaaacgat ctttgagcat gtaccgtttt ctttattaat atagaatact ttggactgat  
8641 tgttttttta aatcattttt gcaataaaca taaagaaata attgtttttt tcttgctata  
8701 gtagaattta acaaccgcc atcctcattt gagctaaaat cacttttctg tataaactat  
8761 tgtattttatt agcatcgcg tctttcataa ttttttatga tatattataa cataaaaaat  
8821 cattaaattt caattaaata aaaaaaagat aatttatgct atattaagca atattatttt  
8881 ataattacaa aaaaatggag ttgtaaaatg tttggaagaa atctaaaaaa aataagaaaa  
8941 gcaagtgggt taactcagtt agagctagca aaaatactaa atacaacaca aagaacaatt  
9001 agtctttggg aaacaggaag ctttgagcca ccgcttaata caattttgct tttatgcaat  
9061 atttttaaag ttactccaaa tgaactattg ttagagggat gttttgatga tgataatgaa  
9121 tatcttgcg atcatattgt aagattaaca aaagaactga attgtaaaac ttatacaaaa  
9181 agattattca atcatgtttt atatagacta gagttaaaaa aacttacatc gcatctgcag  
9241 aaatttaaag gtgattcctt tgctaaaaaa ttagctcatt cttggactgg aaaagggtgaa  
9301 agaatgcttt tagtttttta ttattttatt gaatatttag aaaaatacaa tattaatgaa  
9361 aataatattg ataaaaattc ttttttgaag ctctaaatg attttaatat atctaaagat  
9421 aatacaata ctatacattg ttttatatta aaagaaaaag ataagagaaa tcttatagaa  
9481 tgggtggaaa aagaaatgca agaatttgaa ataaaagttt tggtagctat gttaaaagat  
9541 gaaattaaaa cactggttaa aatgaaata aatattgctga ataaattact ggtgtagtat  
9601 atattatagc tttgattaca agttgatatg taattttatc tctattatag tcttcaagc  
9661 gtaggggctc acaatgctca taataatgat gcggtagcta gaactaatca aaataattta  
9721 gacaaattag gaacagaagg ggtgacaata taagaaaaga atttaataat gataataaag  
9781 atgctatggc taatttttaga aatcaagagg ttaaaactca taatgtagtc cacaacagtg  
9841 ctaaagatgc catagcagaa caataagcta acaggagaat gggagtaaat cctagctctt  
9901 atataatgca agatgcaagc aatcaggca atgagcttgc aaaagaagct caaggcttgt  
9961 ttgatgctat gagaaaaaaa taagtctagc tttttggcta ggcttagtta tctcgatac  
10021 tagggaatat ataatcatat ttacgagaat cgctttctat atatcctgcg attttacttt  
10081 ttcttctatg ctttttctca tcataaggaa ctatttttat attttttagca aggaataata  
10141 caaaagcaat tacaaggcta gatacagata aaagccctaa aatacctata aggctagtga  
10201 taatttttaa atataccaaa agcaaaaca taactgcaac tccgcaagaa agccaaagag  
10261 caagtatgag tttttcggtt gtagtcattt ttgatttttt aagttttact tctgctttat  
10321 ccattgttat tcctttcata ttaacttatt tatataacat aattatatta tattttaata  
10381 aatttttgta agtatttttg ctattaaata cctattttat aggattttta gcgaatttct  
10441 tttatttaag aattaaatt ttcatcaatg gacttgtgaa aattttgtaa aaaatctttt  
10501 ataataaaat cactctttgt attaatthta ttatattgaa tttgttctaa tttaatatth  
10561 tttaatthta taataatctc ttttggttcg atattggttt ttttatctaa aatatcaaaa  
10621 cttttttcaa tatctatttt actgtttctt aaaatcgtgt aatatcaaa caaatctctt  
10681 ggttcatctc tagaaattga agtttctaac ttattaacaa agatattttg tatgctgtct  
10741 ataagcaaac cattttcaag ttttacataa tcgttttttt cgtgaaatac ataactattg  
10801 actaaatcta ttttgagatt attttctttg atataaagtt gagtaaaata ttgattggaa  
10861 acttttattt caaaatctat attattatct tgtaacatac ttgcaaaatc attaaattct  
10921 tttggagtat ggtttttaat tccattgtta atcaagaaaa aatccaaatc atcagaaaaat  
10981 ctaaattgat tatagtgaaa tctttgcaaa gctgttccac ctgtaagata aaaatctaath  
11041 ttttcttttg caactagatc aagaactttg tcttgtgttt tatacaattg gatatacttc  
11101 tcttcttttt cctgcatctt ttatcccata atgtgcgata agctcgtcaa gcctttcttc  
11161 ataataaaat cttttgtgat agcctaathc ttggttttga gaaatgatga attcttttat  
11221 ccattcttca ttatcgataa tctthaaatc ttcaaacatt gtaagcgaath tttgaaaaat  
11281 agcactaaaa attgttcttg caaagcttht atcgthtaata tgttctacta taaaactagg

11341 tgtcatagta gtatttcccc aatagcaatt ttgtaaaatg tgttctgcta tttgcatttt  
11401 atcttttttc attagaatth tccttttttt gcaattttac taaaattatt ttttgaaaa  
11461 taagtggata atttatthtt gcaatgcttt cttaaaatat ttgcagttat caaaaacct  
11521 acgatctaca ggattagtta aagccactac ggtttcttct gaagaaacaa aaccttcttg  
11581 atgaattcaa gtattgcttt ttggagaaag acttactacg cttgtacag ctttatctat  
11641 attatttaca gttaacatca taagtagctc ctttctcaat taatataaca taattatctc  
11701 atattttaat aaatttcacg agtaatatta gtattaaata ctattttatg gggcttttaa  
11761 tgaatttctt tttttatctg actacactta actttaaatt gattacaagt taatatgcaa  
11821 taaatacttt aatgcaggag atthtaatag tccgcaaaat actataggtt ccgtaggtat  
11881 gcaaagctat tatagtcctt ctgcagcttc tacaatccat aaaggtaatt atggcacagt  
11941 agattcatcg gctgtaggat ttggaaataa ttatgaagct gataagaaaa ctatgggaaa  
12001 tggacactta gatttcgcag gacaaaatac agcttgggga caaggcaatt cacaaggaac  
12061 agtgaacaa gaagttcaag gacaggttgc taatgcgaca aatcaattta gcaagatgc  
12121 ccctaaaaga acagttgatg atgggtgtaa tggctcagaa atggctgta atggagcaaa  
12181 aggttcattt aagaataccg taaatgctgt aggaactata actcaaacag ccataacaa  
12241 tccttcgcac cttcttgatt ctaatthttg gataggtgcg agagatgcaa atggaaattt  
12301 aatacaacct tcaaatagtg gaggcaataa ctctgcacca agttctattc ctctgctcc  
12361 taaaatacct tcaaatthaa aatataagca agctaaattt ggcttgctta taaatattgt  
12421 taaaatata ttttgctttt ttttgtgga aatgttaagc atgtaataaa aatttgaaaa  
12481 aatgtttgca agaatgataa ttagaataag ctagaattt ttctagcttt gtaaaagtta  
12541 attaaaaaaa acctttcac cttttttatt ttgtgtatat aattctccta taccttcagc  
12601 attaaataaaa gaaggatcgt acatatgttt attatttctc gacttaactg tatcatcaac  
12661 acaagcatct attaaaccaa agaaaaaga aaatgttttt ttgatgatct ttaaaaccac  
12721 tttcactaat tcataaggca atthtaaaat acctatgaaa agattthtaaa ctccactttt  
12781 agaactatct tthtaatac tthttatagt tthttatcaa gctaaagcat aatataaaat  
12841 gaaagcaatc gctattaagc ctacaagtgt ttttgtgaat atthcattct tgcttataaa  
12901 taaaatgcct atatttgta aaatcaatac aaataatagc gcaaaaatga tthtaattt  
12961 tatatttact gctttatcca ttgttattcc tttcatatta acttattttat ataacataat  
13021 tatattatat thtaataaat tthttgtgta tatttttgct attaaacgac tatttttatg  
13081 gggthtaaaa tggatttctt tthttatctg actacaactt aacttcaagt tgattacaag  
13141 thaatatgta atthtaatct ctattatagt cttcaagcg tagggattaa caatgccat  
13201 aattcgatta agtgtthttt tggtaaatg tcttaagctt aggccaatcg tggthttatt  
13261 ataattattt cggthttttt aagttagata atcaacgagc ttgattatct cgttaattga  
13321 thctaagaca agaactaaaa actcaatgat ctactcatt atthctcctt ctataatcg  
13381 aaagagtagt catacctaact acactthtaat tatagthttt ttgaatgaat gthtttagcct  
13441 cttgtthaaat gthttgatga thaaattcca thaaacaaaag thcaaaatg cgtaagagtt  
13501 tttagcctctt gthaaatgth ttgatgataa aatagactta ththaaaagc ctattthtct  
13561 aatattthta thttcaaag gtgthttthaa cccattcaga thcaactatc gaaagaactc  
13621 ttgcagthtt gtagatatta tcatgaggat tttagtatagt thttacagcg taatactgct  
13681 cattthttac thctctthtt tcaactacaa ctattgtgth aactgattct thttgaagtt  
13741 tcaaaggaat atataaaact acctthtgct tataagctgc aggaataatc atctthtgat  
13801 gattataatt atccttgatg atthttcaact caccattgat aatgtgthct atgaacctat  
13861 catttagthtt thttattatt tctgggcaatc gthctthttct thcaagaga tgthaatggt  
13921 taattctaaa atctaacctg ctatcaaga tgagthcatt ththaaacgaa thaaaatcgt  
13981 tcaaagattt gggthtttcc aaatcatcta aaactctatc cccattagag caaaattthc  
14041 thaaaatata thctccattt thctgctthtt caaagthtgc aatattgga thaacacctg  
14101 tgctatacaa acctgthttg thaacacgct thgtthttgth thttgtataa gthgataat  
14161 caggatagth thttattthca thgaataaatt caaaatattt aatagatag gagaataaaa  
14221 tattattthc gthccccaa aattctthtt gagctatatt agaaagctct thgtctthca  
14281 thgaaaatt thgaaaatag gcaaatgga thaaataaagg thtctctthca actthgtthtt  
14341 gaattthgthc acgattthaa gthttgthttc thgtgthtagc ththttthca thaaactaaag  
14401 aaggtthcgtt thcatctthtt thcaagththaa atctgthttc thgtcaacgthc thactacaa  
14461 thattththca atcatatttht thttcaaata thgactgata thgtctgthg thaatgthc  
14521 aaatttagtht thgtctatctt cataggctthc thaaaatthaa thttctatgth thttththc

14581 gctaaaaacc taattgtcct ttcttataat cttctaaacc ttttaataat ccaaaaagca  
14641 tattagagtc aaccgctcct tcaatagggg tgcctattac ttttcctggt ggagttaaaa  
14701 tataagttgt tggagtcact ccattaaata ataagtctct aggaattagt ccatctgcat  
14761 tcaaatcaga gatagcaacg ataaaatfff catcaagata ttccatcaaa tctctattgt  
14821 ttaacgcatc actcatgagt ttgtggcaat aattgcaagt gtttgaaga acaaaagaaa  
14881 ccattaactt tgcttctttt aatgcttggt tttgagcagc atatacatta tcatagattt  
14941 tagcctctag cgtcatgggg ctaaaggcta aaaagatagc taaaaataaa atttttatft  
15001 tttttagtat cataagatat cctttttaga acaatcctgc aatttgagtt gcgattttgt  
15061 tttccaaaat aggggttgct tcaggaagtt ttagtcctgt ttttacagct tctgcaaaaa  
15121 taattgaatt tttttctata tatttaccct cataggtttg ttgctgacta ttaatttggg  
15181 ttgaattaag ctgtcctact ttatcgctac gaacacttcc gccaaagcta tttaaaaatc  
15241 ctgatgctct ttgatctcta acgcttgctt gtccacttac atttccgcta gaagttaaaa  
15301 ctttaccatc ggctttttgc ttgatattaa tgtcaacttg catttgccaa atagtgtcct  
15361 cggtaaagttt tcctaaaagt cctcctacta aagcacctgc tgcacctgct gcaaccatac  
15421 cgcctgcacc gcctccatta tatccgctaa ttgctgcacc tgtagcacct gctgctacag  
15481 caccgcctgc aacattatft tcttgttttt tatcgcaata taaaacatta gtacttaaaa  
15541 tataagttgc tttatcagga tcatctataa ttttatatcc cttggtttct aatgcgcttc  
15601 ttagtttagg ttctaagtta acttcgtgtc cgcttgattt tttaatatft aagaatacaa  
15661 ctcttttttc ttttgccaca ggatctaaaa agatgctttg actcatagtt gcattagttt  
15721 gtaaagttgt tgttagacaa cccgtaagca agcttgctgc caaataactg cttaatccca  
15781 tttttaaaat tgatttattt attttcatcg ttttcctttt tagtgaatat tttttcaaaa  
15841 atttctttta cctgcttttt aaatfttagc acgactttct tccgtttcgc ccgtagctc  
15901 atccaagctt ttttctatag cattgaaaat tttttaaaat aatttttttc ttgctctttg  
15961 gcatgatggt ttgaaaattc cttagaaatt ttagattcta aataagttct agagaaatct  
16021 gttttatfta aaatcacttc taagtataca gtagctttcg cttctatggt atatftatca  
16081 ttgacaaagc tatcaaccaa aattcaacta cattcctgtc cttatftggt tttattctcc  
16141 tttataaaaa tatatgftat agtgtftaat tttctatatt taagtcctgt tctcctfta  
16201 ttttagtataa actatcattt atatfttgaa ttaatftttc caatacatcg tttttatcta  
16261 aatctfttggg agatfttatat gcaaataacg aagagcataa taaaatagaa cctataatft  
16321 gttttttcat ttttttaacc tttcttatta ttaatctttt ccaagttcta ccattfttgg  
16381 gataggagct gtatftttcaa tatgcttaaa tacaaccaag cagtcttcga taatagttft  
16441 tgcttcttct tcgggtgatt tttcatcaaa tagtgcaatt aaatctaatt tgatatattc  
16501 attagttcg gtgaaatcac cttcattaaa actattaata atagaaatta gatatgctft  
16561 ggcttcatca tctctftggt tgagtctftt agctactcta caaataaatg aagtaacaaa  
16621 atgtaatftt ctgftttattc taaataagaa aaacaatctt tcccaaatct ctttgtttgg  
16681 cacaagcgaa agaatcttcc ctaaggctft atfttctagt tccactatga tatfttcttc  
16741 atfttcatat agagataatt cactgattaa ttgactcaat tcttgtgaaa tttcattftt  
16801 gaatgtatct gtattcaaat gaggtctftt gccaaagaaa agaaagtttg gatttagcatt  
16861 gaatcttata attaatftta caataagctc gcaggttggc tttactctgt gtttttcata  
16921 cattgagata tttgtctggt tagtgcctaa tgcttggtgca aattctgatt gtgtcatggt  
16981 caatctfttt ctaaaatctc ttatatacat taaacctcac ttattaaaat gcacagcatt  
17041 cttftttctt aaaaagcata aaggtgaaat tatctcctgc tacaggataa ttcttagcat  
17101 aactccacaa tatgccactt tgtcctattc ccattcccat aggatgagga acaggtgcta  
17161 aaatttgcaa tctataggat gattfttctc aaataggcat aggatattct ccacaaagtc  
17221 ctaattgccc tgtgctgatg cactatctgc catacaagca agatfttaaaa tgggattacc  
17281 aaatagcaaa gcctcaggat tgattaaagc tgttaattca tcatcttgcc acaaaggatc  
17341 tacttctgtc atataggcta tatccacacc gcctgtaata ttcatacatg ctgcatcaat  
17401 taaagttgct atcatgccta gaactaggat gatatftfta atataaaaaa ctttaattag  
17461 aaatttcttg ataattatat cattfttttag aaaaaaatat atgftttatta tatatattta  
17521 taaatftttt ttataaatat atataataaa catataataa tttttatatt gaagatattt  
17581 tagatataaa aattcaattg aaaaaagtca aaacaaatg cttfttaagt aatgaattct  
17641 tttagcatgaa ttgaaagttt acccaattgc agatagctat catcaatttg taaaattca  
17701 cttftaatcc tataaaataa gcattftaata gcaaaaaatc ttacaaaaat ttattaaaat  
17761 ataataataa tatgtttatat aaataagfta atatgaaagg aataacaatg gataaagcag



```

17821 aagtaaaact taaaaaatca aaaatgacta taaccgaaaa actcatactt actccttggc
17881 tttcttgagg agttgcagct attgttttgc ttttgggtata tttaaaaatt atcactagct
17941 ttataggtat tttagggctt ttatctgtat cttagccttgt aattgctttt gtattattcc
18001 ttgctaaaaa tataaaaaata gttccctatg atgagaaaaa gcatagaaga aaaagtaaat
18061 ttgcagaata tatgagtagc ggacgttgta aatattatca tatattcggt gctatacgag
18121 ataactaagt ctagccaaaa agctaggatt tactcccatt ttcctattag catcttggtc
18181 tttttacat ataattttac atataatttt acatatataa tttaaaaata tataaattaa
18241 atataaaaaat tactaaatat atttaataat tatgtaaaac attattctat tttttcaaat
18301 atatttttag atacaatcag ggctaataat aacacacaaa acaaggcaaa aaagaatatt
18361 caatgaaaag attatctgta aaaggcaata agggaaaaaa caaaaaaact tatgatcaaa
18421 taatggaaat tttatcaata caagtaaaag aaaatctacc atcaaaggta gtagcttcta
18481 ggtatgatat aaccttgcaa acagtatata agtggagaaa gaaatataca aaatatttag
18541 aaaattacga aaaagtaaaa caagaagctg aagaaaaaac tttaaaagaa tccgatttag
18601 aaaatgaaca tattcatata tcagattgtg caaaaagact aagaacttta agaatagcac
18661 tcaatctaag tcaacagcgt atagcaaata tacttggaat atccaagct ctttatgtta
18721 gatttgagaa aggatatgga caactcaaca gctttatgat taaaaaactt taaaaaactc
18781 taggaatcaa tcctattttat ctaatttgtg gagaaggcga ttgctttcta atcaaagaca
18841 ttgattttatt tgaagaata aataacgaac aaaagaaata caacaaaaat caacttgaac
18901 aagaaaacat cttaaactat tagataaatt tatctatatt aaattaataa tataaattaa
18961 ttctcttttt taaaataaac cgatctttta aataatttct taaagagcgt tattataaca
19021 gttccatttt ttacctaaagt aattgaaaaa atgggtgcag tgaggtttta agacgaatac
19081 agcgaatttt tacttcatta aaacaaaagg ctcaaaaatc tttttgcaag gaagattggt
19141 ttaagaaaat tatacagata aggaagaaaa aaatagaaca agctataaga ttgctgttga
19201 aactatgaag tttttagata gcaagcctgc tgataataat caatcgggta atccttatgg
19261 taatgttcaa gcaactcctg aacctgtgaa tcagtctgtg caaaaacaag tacctattca
19321 tcagtttgag gaacaacaag gagaagatct tcctttttaa ctctaagcac ttaaccata
19381 gttgggatat ttttatccca ttatgggata ttaataccc ttgactttta gcattttttt
19441 gttataagat aaggagaaga aatatgaaag attttttcaa aaaactatcg atatttacia
19501 aaataccac aaaagcaatc ttaagattca tggaatctat

```

//

```

LOCUS      IKNDEOKD_2                12446 bp    DNA        linear      12-APR-2021
DEFINITION Campylobacter species strain strain.
ACCESSION
VERSION
KEYWORDS   .
SOURCE     Campylobacter species
  ORGANISM Campylobacter species
            Unclassified.
COMMENT    Annotated using prokka 1.14.6 from
            https://github.com/tseemann/prokka.
FEATURES   Location/Qualifiers
  source   1..12446
            /organism="Campylobacter species"
            /mol_type="genomic DNA"
            /strain="strain"
  gene     77..592
            /locus_tag="IKNDEOKD_00031"
  CDS     77..592
            /locus_tag="IKNDEOKD_00031"
            /inference="ab initio prediction:Prodigal:002006"
            /inference="similar to AA sequence:RefSeq:A0H52017.1"
            /codon_start=1
            /transl_table=11
            /product="ankyrin domain protein"

```

```

/protein_id="Prokka:IKNDEOKD_00031"
/translation="MIEYFFKKGCTFETYNEESGSTPLHEWILCGEEVKYLEEALKLG
ANPNMRSIKTENKFSFGAGETLLHRAAESDEKPIGACVEVLIKYGADVNAANCRISD
IEDGKISYYKPATPLDRANRARNVSKNIKILKKAGAKTWEELVEEYNIIDTSLERIEQI
KMYEERRKDKK"
gene 629..2560
/locus_tag="IKNDEOKD_00032"
CDS 629..2560
/locus_tag="IKNDEOKD_00032"
/inference="ab initio prediction:Prodigal:002006"
/codon_start=1
/transl_table=11
/product="hypothetical protein"
/protein_id="Prokka:IKNDEOKD_00032"
/translation="MEFNDINFKIKEFESVDIISDYSLVFYLPKEEHMIGEKDQDGKI
RINKSNSLKYIEKINEEKEKEIEKLLQSNKINEEFDKLKDDALPTKEYKRKNYEYD
VFYDVYTSKDNINKCIKKIPIKNGVGTLSNFLRRFYENSVKGEYNCKWCLIPRLIRN
KGESSFDPVPILNSSFVISELSNIKQKTLTFQRTIANVEHPNHFALQSPKEFKRMLEN
EQSFASYGGKEQIEELLKTAQHKLLETIEKAVGISEETKEDLEKKQRKEVEKCKKLEH
SGKKISPKLIGDTGEYVASLLFGKRSTRYLSNQRKLDANFNIYSFNHTIPDFLVSING
IPSLVEVKNVQVQSLTEQISFELKLAREYELDYIFVCNHYHTLTENVAGSALTREEHE
ELARDDGDKVGEFNKETKRLKAKIAEVLNEKDDLNEEFIKSVSDGNKYLKEREKFY
KVASDVYIKNPIYKMGFEKLLQNQVVDINIVKDFLKDFAKRLGIDEKVLPIVIGYNPQR
GDSGTDYTVNTLDLNPKASYVDFIDTIIHEFRHFYIYCIKNNSSENSIEKLLYLDMVQ
FYIPWNFYKIFNSYDKKCLIYDNEDETKKCLKNRTYYGSWKFLNPTLDLLPSPLYLQ
PSELDSRIMAYYFRKEIKL"
gene 2560..3825
/locus_tag="IKNDEOKD_00033"
CDS 2560..3825
/locus_tag="IKNDEOKD_00033"
/inference="ab initio prediction:Prodigal:002006"
/inference="similar to AA sequence:RefSeq:CKG88389.1"
/codon_start=1
/transl_table=11
/product="hypothetical protein"
/protein_id="Prokka:IKNDEOKD_00033"
/translation="MTPPSLPDVEKHEDFLQTRKEPYAIYLAINIKNISYNNICPSEK
YFWKFDNMNELDKWYNPKFGIYLGKIVFDKKNKLI PKYIAAKFENLEEEVKKIKNPL
WLANKNPNIIEPKFYDGMSSGGYFESPNNLEYQCKIEKDTQVLSQEIIISYVKELYSK
NTIIKKNYIDAINKDYGIKPFVFSDEIYDELGEVGILTKEQANNFKDKSYIKKDPILL
AMLDYLAKQNKDEDYLITFDDEYFYTYLVWVSLKDFLLELSYGLFQDETELLFNPAAY
MDDTKIYYQNLNEEINKRYEKILLNMGFEGENGYFKDYDYDYGFGNNGIFEFISIYDYFA
YDEIGVQPIQQSPYVPPKSPFDSNPFVYSYDGNHGDACLVPVSGALGKYFELLYQKEIY
IELLRPYPSIKDLPEGWDMLEKANLK"
gene 4517..4723
/locus_tag="IKNDEOKD_00034"
CDS 4517..4723
/locus_tag="IKNDEOKD_00034"
/inference="ab initio prediction:Prodigal:002006"
/codon_start=1
/transl_table=11
/product="hypothetical protein"
/protein_id="Prokka:IKNDEOKD_00034"
/translation="MDALGRYVFYSEKAYINEKIIIFDKLSRICDPSENYLVGCNIGAI

```

gene QDAYEIQPNERDPRYVETLIGRSL"  
 4736..4918  
 CDS /locus\_tag="IKNDEOKD\_00035"  
 4736..4918  
 /locus\_tag="IKNDEOKD\_00035"  
 /inference="ab initio prediction:Prodigal:002006"  
 /codon\_start=1  
 /transl\_table=11  
 /product="hypothetical protein"  
 /protein\_id="Prokka:IKNDEOKD\_00035"  
 /translation="MKTIKIPLKDYISNIREDKTIYLGQLQSNMSIKGLDEEFLKKNII  
 LREISNLKQAFIWKL"  
 gene 4903..5151  
 CDS /locus\_tag="IKNDEOKD\_00036"  
 4903..5151  
 /locus\_tag="IKNDEOKD\_00036"  
 /inference="ab initio prediction:Prodigal:002006"  
 /codon\_start=1  
 /transl\_table=11  
 /product="hypothetical protein"  
 /protein\_id="Prokka:IKNDEOKD\_00036"  
 /translation="MGKIIIKEKNIIFKAFNIDENCFEGLKELFFKNNPYTIIDNLEL  
 KKYFLKLYKDNIEFLTSYINEINQVHGKLYYILHLML"  
 gene 5879..6154  
 CDS /locus\_tag="IKNDEOKD\_00037"  
 5879..6154  
 /locus\_tag="IKNDEOKD\_00037"  
 /EC\_number="3.6.1.-"  
 /inference="ab initio prediction:Prodigal:002006"  
 /inference="similar to AA sequence:RefSeq:ABS44566.1"  
 /codon\_start=1  
 /transl\_table=11  
 /product="F-box only protein 18"  
 /protein\_id="Prokka:IKNDEOKD\_00037"  
 /translation="MDEAQDINACVIDIVLNQKQAKKVFIGDTFQSIYKFRGAVNSLE  
 ILASMPKSHTLYLTQSFRCQNIAFITNSYLKILNAPRDFKGTKKIK"  
 gene 6114..6752  
 CDS /locus\_tag="IKNDEOKD\_00038"  
 6114..6752  
 /locus\_tag="IKNDEOKD\_00038"  
 /EC\_number="3.6.1.-"  
 /inference="ab initio prediction:Prodigal:002006"  
 /inference="similar to AA sequence:RefSeq:ABS44566.1"  
 /codon\_start=1  
 /transl\_table=11  
 /product="F-box only protein 18"  
 /protein\_id="Prokka:IKNDEOKD\_00038"  
 /translation="MLREISKEQKSSNENVKNEAKAIVCRTNAKLFDAVENLDKKL  
 FFVGGINSYSFDELLDIQNLLFKKHEYIKNQFIVKFADLKELLEYINETKEVDLKQKI  
 FVLFKYVHGDIKLIKAIKSSVKKQEADLILSTGHKSKGLEWNNVEIIDDFLNIQK  
 ELEERVITIAKEELNLLYVAITRAKNLSISKDYLFKEFEFIQENLERIIIE"  
 gene 6749..6961  
 CDS /locus\_tag="IKNDEOKD\_00039"  
 6749..6961

```

/locus_tag="IKNDEOKD_00039"
/inference="ab initio prediction:Prodigal:002006"
/inference="similar to AA sequence:RefSeq:AVL47291.1"
/codon_start=1
/transl_table=11
/product="helix-turn-helix domain-containing protein"
/protein_id="Prokka:IKNDEOKD_00039"
/translation="MKIIKKLQKDGSFKEQVYYSVHEVSQMHSVTHVTVRLWISRGI
L
KGMKLGKGFYMSKEAIIIEFQKNDGLL"
gene 7729..8649
CDS   /locus_tag="IKNDEOKD_00040"
      7729..8649
      /locus_tag="IKNDEOKD_00040"
      /inference="ab initio prediction:Prodigal:002006"
      /inference="similar to AA sequence:RefSeq:ADC28003.1"
      /note="conserved hypothetical protein"
      /codon_start=1
      /transl_table=11
      /product="hypothetical protein"
      /protein_id="Prokka:IKNDEOKD_00040"
      /translation="MEAKGIAIFPTNVAFSKKTNAFFTELEDQFLKEGVGNKSAIKLD
FEYYILYCQFLQIDKESLFFGRNYELVFCFLLYRALLNKNNTQKIVAKIINVIRCQD
RLPEKVHYREKIIICMDNQHRDLSQTLSSCIAEFYNSIDLNTFRKNIGFENRKKIAIE
MLNRASEHYGFFGLSRGGITYKEEKISCVPIQALDEFHHGMSHLCAVFLKEDGRYTNL
ERAIPHFKRGMMEVYKTIIRDFMILNKDALGVKQEALKIRELEYQTIGPKPTVTKNPT
TNLTNKKEEKVIPGYKELCEKIVSQIKNAK"
gene  complement(8749..9777)
      /gene="flgS"
CDS   /locus_tag="IKNDEOKD_00041"
      complement(8749..9777)
      /gene="flgS"
      /locus_tag="IKNDEOKD_00041"
      /inference="ab initio prediction:Prodigal:002006"
      /inference="similar to AA sequence:RefSeq:CAL34921.1"
      /codon_start=1
      /transl_table=11
      /product="signal transduction histidine kinase"
      /protein_id="Prokka:IKNDEOKD_00041"
      /translation="MNENILKSLDSSEKETLQKGLQSLIEQTYIVENEYKILNENYNS
LRAMVDEIIEVLPSALWILDKEKNIILQNQEALKKPKLLDIISLEKNRDELEFENRFY
AVKIIAHNEKTIVSATDISDEKRNERLASMGVAHLAHEIRNPIGSISLLASTLFSR
SELKNKHIVLEIQKAIARVERIVNSTLLFTKGVHINASEFNLELTEECESAINSYNY
SSQIDFEINFLDMKIYGDKALLSLVLQNLIIYNAIDAIEESEECENPKIKIQASCDEKNL
YIRVYDNGCEIKDENLVFEAFKTTKLKGNLGLSLSKEIINAHKGELKFEIWPKNFYF
VLPLHYNS"
gene  complement(9774..10595)
CDS   /locus_tag="IKNDEOKD_00042"
      complement(9774..10595)
      /locus_tag="IKNDEOKD_00042"
      /inference="ab initio prediction:Prodigal:002006"
      /inference="similar to AA sequence:RefSeq:CAL34920.1"
      /note="conserved hypothetical protein Cj0792"
      /codon_start=1
      /transl_table=11

```

```

/product="hypothetical protein"
/protein_id="Prokka:IKNDEOKD_00042"
/translation="MAKIFDFYSVFEGFESLDSLNFEEVDVFNHIEYLLLKNYLDIKDC
FKLDETASYALSLLAKNNRKRFSINRKIQHFALSTLKYLLRVGIIKLEHSKEAKRVR
DKRQKLLKELRSYVIQDKIIFANQFTRFFFYFLKPNEKLILQNRYYEVLTLIKEKFEL
YQSFCFEQLSRELLEKKFQVSGVQSYWDKNLELDLYYKDDEISFIGEYKFKNKKICRN
ILNLELAKASLKLPEPNYIIISKNGFSKEFYKICKQDLLLDDLDFKILLEENK"
gene 10699..11967
/locus_tag="IKNDEOKD_00043"
CDS 10699..11967
/locus_tag="IKNDEOKD_00043"
/inference="ab initio prediction:Prodigal:002006"
/inference="similar to AA sequence:RefSeq:CAL34919.1"
/codon_start=1
/transl_table=11
/product="putative aminotransferase"
/protein_id="Prokka:IKNDEOKD_00043"
/translation="MQISDLKKEIILKKGTLHFDFTASALALKCVEKEIAKILPSYAN
THSDSSLNSFKTQQIYEQARKDIKTSLNLSDEFALIACGSGSSSAIKKFQELLGIYIP
PLVKEYFEKVDKSTLPLVIVGPYEHHSNELSFREGLCECIRIPLDKKGNIDFEILEK
VLKENQHRKIIASFSLASNVTGILSDYKRISKLVRKFKGIVAFDASSFIPYKNIACKY
YDALFISSHLIGGIGGSGLLAIKKELCGNKPSFAAGGTGVYVSRSTSQCYLNEEAL
EGGTPGILQLIRASLAFKIKDEIGIEEIEKKEEILKEYFFEKLKTIPHLILYANNIKA
RLPIFAFNIKNI SPFDLAYELSKKYHIETRAGCACAGPYGHDLGLKDNHEELKTKPGW
LRISLHYTHEKEDIDYFFEALQKSIKLF"
gene complement(11971..12047)
/locus_tag="IKNDEOKD_00044"
tRNA complement(11971..12047)
/locus_tag="IKNDEOKD_00044"
/product="tRNA-Asp"
/inference="COORDINATES:profile:Aragorn:001002"
/note="tRNA-Asp(gtc)"
gene complement(12069..12144)
/locus_tag="IKNDEOKD_00045"
tRNA complement(12069..12144)
/locus_tag="IKNDEOKD_00045"
/product="tRNA-Val"
/inference="COORDINATES:profile:Aragorn:001002"
/note="tRNA-Val(tac)"
gene complement(12153..12228)
/locus_tag="IKNDEOKD_00046"
tRNA complement(12153..12228)
/locus_tag="IKNDEOKD_00046"
/product="tRNA-Glu"
/inference="COORDINATES:profile:Aragorn:001002"
/note="tRNA-Glu(ctc)"
gene complement(12242..12317)
/locus_tag="IKNDEOKD_00047"
tRNA complement(12242..12317)
/locus_tag="IKNDEOKD_00047"
/product="tRNA-Lys"
/inference="COORDINATES:profile:Aragorn:001002"
/note="tRNA-Lys(ttt)"
gene complement(12321..12397)

```

```

tRNA      /locus_tag="IKNDEOKD_00048"
          complement(12321..12397)
          /locus_tag="IKNDEOKD_00048"
          /product="tRNA-Asp"
          /inference="COORDINATES:profile:Aragorn:001002"
          /note="tRNA-Asp(gtc)"

```

ORIGIN

```

1  acttaaagct gatgaagtac acttttgata caatgcactc agtagatata tcgatagaga
61  tggaaaaaat aaagaagtga tagagtattt ttttaaaaaa ggatgcacat ttgaaactta
121 taatgaagaa agtggtagca ctcctttgca tgaatggata ttatgtggcg aagaagtgaa
181 gtatttagaa gaagctttaa aactaggagc aaatccta atgagaagta ttaaacaga
241 aaataaattt agcttttagt gtgcaggaga aacccttttg catagagctg cagaatctga
301 tgagaaacct ataggagctt gcgtggaagt gctaatacaa tatggagctg atgtaaatgc
361 ggctaattgt cgcataagtg atattgaaga tggaaaaatc agctattata aacctgcaac
421 cccattggat agagccaaca gagctcgcaa tgtgagcaaa aatataaaaa tcttaaaaaa
481 agcaggagct aaaacttggg aggaattggg tgaagaatac aatatacgata caagcttaga
541 aagaatagaa caaattaaaa tgtatgaaga aagaagaaag gataaaaaat aagattaata
601 aggcaaagaa caaaaaagg atttttcatt ggaatttaat gatataaatt ttaaaatcaa
661 agaatttgaa agtgtggata tcatcagtga ttattctctt gtcttttatt tgcctaaaga
721 agagcatatg ataggagaaa aagatcaaga tggtaaaatt cgcatacaata aaagtaattc
781 tttaaaatat atagaaaaaa tcaatgaaga aaaagaaaaa gaaattgaaa aacttaaaact
841 tcaaagcaat gaaaaaatca atgaagaatt tgataaatta aaagatgatg ctttacctac
901 taaagaatat aaaagaaaaa attatgaata cgatgtattt tatgatgttt atacaagtaa
961 ggataatata aacaagtgca taaaaaaaat cccgataaaa aatggtgtag gaacgctaaa
1021 atcaaatttc ttacgaagat tttatgaaaa ttctgtcaag ggtgagtata attgtaaagt
1081 gtgtcttata ctagactaa tccgcaataa aggagaatct agttttgatc ctgtgcctat
1141 tttaaatagt agctttgtca tttcagaatt aagcaatatt aaacaaaaaa cccttacttt
1201 tcaaagaaca atagccaatg tggaacatcc aaatcatttt gctttacaaa gtcctaagga
1261 atttaaactg atgcttgaaa atgagcaaag ctttgcttct tatggtggca aagaaaaaca
1321 aatagaagag cttttaaaaa ccgcacaaca taaacttgaa accattgaaa aagcagttgg
1381 aatttctgaa gaaaccaagg aagattttaga aaaaaagcaa agaaaagaag ttgaaaaatg
1441 caaaaaatta gaacatagcg gtaaaaaaat ttcacccaaa ctcataggag atacgggaga
1501 atatgtcgct tctttacttt ttgggaaaag atctacacgc tatttaagca atcaaagaaa
1561 attggatgct aattttaata tctatagttt taatcatacc atacctgatt ttttagtaag
1621 tattaatggt attcctagtt tagtagaagt taaaaatggt caagttcaaa gcctaacaga
1681 acaataagc tttgagttaa aactggctag agaatatgaa cttgattaca tctttgtgtg
1741 taatcattat acacatttaa cagaaaatgt agcaggaagt gcattgactc gtgaagaaca
1801 cgaagagcta gcacgagatg atggagacaa agtgggtgag ttttaataaag aaacaaaaag
1861 attgaaaaaa gcaaaaatag cagaagtctt aaatgaaaag gatgatttag ctaatgaaga
1921 atttattaaa agtghtaagt atggaaataa gtatttaaaa gaaagggaga aattttataa
1981 agttgcttca gatgtttata ttaaaaacc tatttataaa atgggctttg agaaaaaact
2041 tcaaatcaa gttgttgata taacattgtt aaaagatttt ttaaaggact ttgctaaaag
2101 actagggata gacgaaaaag ttttgcctgt aattggatat aatcctcaac gaggggattc
2161 tggaacatat gactatacag taaatacttt agatttgaat ccaaagctt cttatgttga
2221 ttttattgat accattattc atgaatttag gcatttttat atttattgca taaaaataa
2281 ttctgaaaat agtatagaaa aattgcttta tcttgatatg gtacaatttt atataccgtg
2341 gaatttttat aaaattttca atagttatga taaaaaatgc ttaatttatg ataatagaaga
2401 tgaacgaag aagtgtttaa aaaatcgcac atattatgga agttggaaat ttttaaatcc
2461 cacattagat ctcttgccaa gtcctttata ctatcttcag ccaagtgagt tagactctag
2521 gattatggca tattatttta gaaaggaaat taaattataa tgactccacc atctttacca
2581 gatgtagaaa aacatgaaga tttcttaca accagaaaag aaccttatgc tattttatta
2641 gccataaaca caaacataaa aagttataat aatatttgtc ctagcgagaa atatttttgg
2701 aaatttgata atatgaatga acttgataaa tgggtataacc caaatttgg catatacctt
2761 ggcaaaattg tttttgataa aaaagacaac aaactcatcc caaatatat agccgctaaa

```

2821 tttgaaaatt tagaagaaga agttaaaaag ataaaaaatc ctttatggct tgctaataaa  
2881 aatcctaatt atattgaacc taaatTTTTat gatgggtatga gtggggggtta ttatTTTTgaa  
2941 agtccaaata atttagagta tcaatgcaaa atagaaaaag acaactcaagt ttttaagccaa  
3001 gaacaaatca tttcttatgt gaaagaactt tatagtaaaa acacaataat aataaaaaat  
3061 tatattgatg caatcaataa agactatggc ataaaacctt tcgtatttag tgatgaaatt  
3121 tatgatgaat taggagaagt tggcattcct acaaaaagaac aagctaataa ttttaagat  
3181 aaaagttata ttaaaaaaga tccgatattg cttgctatgc ttgattatTT agcaaaaacaa  
3241 aataaaaaag atgaagatta tttaatcact tttgatgatg agtattTTTTa tacttatttg  
3301 gtttggagtt taaaagattt cttattagag ctttcttatg gtttgTTTTca agatgaaacc  
3361 gagcttcttt ttaatcctgc agcttatatg gatgacacaa aatatatatta tcaaaattta  
3421 aacgaagaaa taaataagcg ttatgaaaaa atattgctta atatgggatt tgaaggagaa  
3481 aatggttatt ttaaagatta ttatgattat ggctttggca ataattggtat ttttgaattt  
3541 agcatatatg attatTTTgc ttatgatgaa ataggagtac aaccaattca acaaagtcca  
3601 tatgttccac ctaaaagccc ttttgatagc cctaattTTg tctattctga tggaaattat  
3661 cacggagatg caaagcttgt cccttctgct ttaggaaagt attatTTTga gcttttatat  
3721 caaaaagaaa tttacataga actTTTtacgc cttattatc caagcataaa agatttgcca  
3781 gaaggttggg acaataaaat gctagaaaaa gctaatttaa aataaaatta tagatatgag  
3841 ctttagagta ggagttggaa gggatgagag tgtaaaagaa agcaagctat gaaataattt  
3901 taacaacgct gtaaaaaata attagacgcc taaagacatt atctaaca aaattgtttt  
3961 tagtgttttt gaagctgtag agtttttaaa agcttgtcaa agttttaaag aaaaaaatg  
4021 aacagataa ttatattTTT tcaaaacctt tcctcaattt gcaggaaaaa ttgcttatat  
4081 atactataga tttgatTTaa tcaacaagga atTTTtaaca agcgtatcag aaaaagataa  
4141 aggaaattat cttcaagtta gagatggcaa atatattagc accataatta ataaaattt  
4201 accttagag tataagaatg gtaaaagttt taacaattc cacacagagc ttttaataa  
4261 caaaaacaga gatcttaaag aatgtaaaga ttttctaaaa gctttaactc aaactcttg  
4321 taaagaattt aatttacctt tagaaaaat agtcttttat agccaaaagc ctagtggatc  
4381 tttatcattt ggagcttatg aagaaaataa ggtcagatta aatcaatata ttttaaaagc  
4441 ttatTTTtaa gaatttgcaa aaacggtttt tcacgaatgt aggcattttt atatagaaaa  
4501 atattataat cacaatatgg atgctctagg cagatatggt ttttattctg aaaaagctta  
4561 tatcaatgag aaaattatTT ttgataaatt gagtagaatt tgcgatccta gtgagaatta  
4621 ttttagtagt tgcaatatag gtgctataca agatgcttat gaaattcagc ccaatgaaag  
4681 agatccaaga tatgtagaaa ccctcatagg tagaagTTta taatcaagga aaataatgaa  
4741 aactataaaa ataccgctta aagattatat ctccaatata agagaagata aaactattta  
4801 cttgggcttg caaagtaaca tgagtataaa aggacttgat gaagaattct taaaaagaa  
4861 tataatctta agagaaattt caaatttgaa acaagcattt atttgggtaa aattataatc  
4921 aaagaaaaaa atatcatctt taaagctttt aatattgatg agaattgctt tgaagggctt  
4981 aaagaacttt tcttcaaaaa taaccctat acaattatag ataatttaga attaaaaaaa  
5041 tatttcttaa aactttataa agataatatt gaattTTTaa cttcttatat taatgaaatt  
5101 aatcaagttc atggatttaa actttactat atTTTtacatt taatgctTTa aaattctaag  
5161 tcctcataa agcatgagtt taattaacat agcattctta aaactgctat aatcatctt  
5221 ttttgcttt ttccttctaa aacattatTT agccttatag tttcattctc gctaagataa  
5281 ttttaactttt cttctgcttt ttcagttTTa aacctaattt tttcatatca aagctaaaaa  
5341 ggaataagtc atcattatta tcacttataa aaaagctagt taatactctc aaataagtaa  
5401 ttttgttctt tttgataatt tattgctatt ttttaaatTT ttttccaaat aattaagaaa  
5461 attaatcaaa aaagttgTTt ttatatcatt tatttgcatt tcctctgat aatccagtaa  
5521 atattccaca agctctaaaa atacacctat aaaacaataa agtgttcttt aatataatat  
5581 tatttatata aataaaattt catataatcc acatacaaca tcagaaattg ataataaata  
5641 tttatcttga tttatcttat tgatgttttt aagttttatt ccaacaattt cataaaactt  
5701 tggttttatt gtatttaatt tatcttcagt gtaaaaaatt tatattTTTgc aattagtcct  
5761 tcaacaatt ttataaatgc aaaatctata ttttcaagtt ctttgctata caaataatta  
5821 tttataactt cttttaattc aacttcaaaa accaaagcta aagtatgatt ttatTTTtagt  
5881 ggatgaagca caggatatca acgcttgtgt tatcgacatt gttcttaatc aaaaacaagc  
5941 taaaaaagtt tttatagggg ataccttca gagtatttat aaatttagag gagcggtaaa  
6001 ttctttagaa atattagcat ctatgcaaaa atctcacact ttatacctaa cacaaagttt

6061 taggtgtccg caaaatatag cttttattac caactcttat ttgaaaattht taaatgctcc  
6121 gcgagattht aaaggaacaa aaaaaatcaa gtaatgaaaa tgtcaaaaaac gaagcaaaaag  
6181 ccatagtgtg tagaactaat gctaagttat ttgatatagc cgtagagaat ttagataaaa  
6241 aattatthtt tgtaggagga ataaatagtt atagthttga tgagttacta gatatacaaa  
6301 atcttcttht taaaaaacac gaatatatca aaaaccaatt tatagtaaag tttgctgatt  
6361 taaaggagct tcttgaatat ataatgaaa ctaaagaagt tgattthaaag caaaaaatct  
6421 ttgttcttht caaatatgtg catggcgata ttataaagct tattaagcc attgaaaaaa  
6481 gtagcgtaaa aaaacaagag caagctgatt taatcttaag cacaggacat aagagcaaag  
6541 gcttggaatg gaacaatgth gaaattatth atgathtttt aaacatcaag caagaactth  
6601 aagaaagggth tcgaatcacc atagcaaaaag aagaatthaa cctthttatat gthggcaatca  
6661 caagagccaa aaattctcta agtattagca aagathtttt gthttgaaaa gaathttatac  
6721 aagaaaatth agaaaggata ataatagaat gaaaataatt aaaaaattac aaaaagatgg  
6781 aagcttcaaa gagcaagtht attattctgt tcatgaagth tcacaaatgc actcagtaac  
6841 gcatgtaaca gthtcgctat ggathttcaag aggaattcta aaaggtatga aattaggcaa  
6901 aggathttat atgtcaaaaag aagccattat tgaathttcag aaaaatgatg gthttattata  
6961 attaaggaga gaaaaaatga cthtttagtag aaaagaatgt gctaaaatth ttgggatatc  
7021 tthgcaaaact ttagatagat tgacaaaaga taaaaataa aatcaatgaa tataactcgt  
7081 tthgtattat tctccattga agaaatagct aaaattctct caggggctaa gthcaaaaa  
7141 tgaatagaaa agatagggtt gcactagctg cttatcataa aaataaaaag ctcactthgt  
7201 ttggtaagth agtaatthaa aagtatatgt taaagtatat gthtttttaga taththattt  
7261 ttaaagatag gataththaga taththgatta ataaatcaca cgccgacctc aggcaccatt  
7321 gcttctthaa atcataaaat tccaaaaaaa thttattgth tataththgtc cgaaaaaatg  
7381 cthctaaaaat agctgaaata thttathhata gatathhaaa ataththttat ataaataaaa  
7441 tatgctthaa atthtgthaa ataththatt ataaattatt taaaaataat aagctcgtc  
7501 cthtaaaata agataaaaat agccctatat tcthaaaata gactaaaaat gthtgathhaa  
7561 acthaaatta aacthaaatt tgatathgth cgcgcatca aaaaagthta aataaaaaat  
7621 taaaaagthca tagthththta aactgaaaca thttgtgtht thttcataga aatcataat  
7681 acaataaaag atctatatac cgaataacta aaaaaaaagg gthgggggtht ggaagcaaaa  
7741 ggaatagcga ththtctac aaatgthgca thtagthaaa aaacaaatgc ththttcact  
7801 gaathhagaag atcaattctt aaaagaaggg gthcgghaata aaagthccat aaaactagat  
7861 thtgaaatatt ataththhata thgtcaathh thacaaatag acaagaatc cthaththtt  
7921 ggaagaaact atgaaactth gththththt thactthatt atagagctth atthaaataa  
7981 aacaatactc aaaaaatcgt agcaaaaata ataaatgthta tacgthgcca agatagathh  
8041 ccagagaaag thactatag agaaaaata atthgtatgg ataatcaaca cagagatctt  
8101 tctcaaacac taagthcatg ththgcagaa ththhataatt caathgatct atacaatacc  
8161 thtagaaaaa atathgghat tgaaaataga aagaaaatag cgatagaaat gthhaaatcgc  
8221 gcatcagaac actatgthtt ththggctta agcaggggag gaataacata thaaagaagaa  
8281 aaaatctctt gcgtccctat acaagcatta gatgagthtt atcatgghat gthcgcathh  
8341 thgtgcagtht ththhaaaaga agatggacga ththaccaatt thagaaagagc gatccctcac  
8401 thcaaacgth gaatgatgga agthatacaaa acaataatca gagaththtt gatathhath  
8461 aaagatgctt taggagthcaa acaagaagcc thhaaaataa gagaathhaga atathcaaac  
8521 ataggaaaac ccaaaacagth acaaaaaaac cthaccacaa acctaaccaa thaaaaagaa  
8581 gagaaagthta thccaggata thaaagaactg thcgaaaaaa thgtcagthca aathcaaaat  
8641 gcaaagthaa atcgghatga atthgagctth agthtgcaat thtagctthatt thctaththgc  
8701 atactthagag cctthctthg aagaaathhth acaaaatctt atcataaatt aactathhata  
8761 atgthaaagc aaaacaaaat aaaaaththtt aggcacaaatt thcaaththta atthctctth  
8821 atgagcatta atgaththct thagaaagcga thggcccaat cctthctctt thagththtagt  
8881 agthcthaaa gctthcaaaa ccaaththtt atctthgath thcacaacct ththcataaac  
8941 cthaatgtht aaaththttct catcacagct thgtthgaatt thgaththtag gaththtcgca  
9001 thcactthct thgatcgcath ctatggcath ataaatcaaa thththgcaaaa ccaagataa  
9061 aagthgcctta ththcthataa ththctatath thaaaaatth atthcaaaat caaththgaga  
9121 thgagthatta thagaathhth thgactthtt acactcttht gthhathhcth aaagathhthaa  
9181 thcgctthgca thgatathgca cactthggth aaaaagcaag gthagaathhth caathcgtc  
9241 thaccctagca atagctthtt gaaththcaag cacaaatagth thgtththhth gthctactag



9301 agaaaaaagc gtggaggcaa gtaaggatat agagcctata ggattttctta tctcatgcmc  
9361 taaatgcmc gcaacacttc ccatactagc aagtctttca ttgcmgtttt catcmgcta  
9421 atccgtagct gaaactatgg ttttttcatt atgagcaata attttaaccg cataaaatct  
9481 attctcaaat tcaagttcat cacgattttt ttcaagactg ataatatcaa gcaatttagg  
9541 ttttttcaaa gcttcttgat tttgcaaaat aatatttttt tctttatcta aaatccaaag  
9601 cgcactaggc aaaacctcga taatctcatc taccatagca cgcaaagaat tataattttc  
9661 gtttaaaatt ttatatctgt tttctacaat ataagtttgc tctataaggc tttgtaagcc  
9721 tttttgtaag gtttcttttt cacttgagtc tagacttttt aaaatatttt cattcattta  
9781 ttttctcta ataaaatttt aaaatcattt aaatccaata aaagcaaadc ttgtttacaa  
9841 attttataaa attctttact aaaaccattt tttgaaataa taatataatt atttggctct  
9901 agttttaaag attttgcttt taattctaaa agatttaaaa tattttctaca aattttttta  
9961 tttttaaatt taacttcacc gataaaactt atctcatcat cttataataa aagatcaagt  
10021 tctaaatfff tatcccaata actttgcacc ccgctcactt gaaatfff tttcaagtaat  
10081 tctctggaag gttgctcaaa acaaaaactt tgataaagtt caaatffctc tttaatcaaa  
10141 gttaaaactt cttcatagcg attttgcaaa atcaactfff cattggggtt tagaaaataa  
10201 aaaaagaagc gagtaaatg attggcaag ataattttat cttgtatcac ataagatctt  
10261 aattctfff taagttttg tcmgtttatct cttacccttt tcmctcttt gctatgctca  
10321 agttttataa tccaactct taaaagatat tttaaagttg ataaagcctt aaaatgctga  
10381 atttttctat tgatagaaaa acgcttacga ttgtttttag cttagcaagct aagagcataa  
10441 gaagcmgtct catcmgactt gaaacaatcc ttgatataa aatagttttt gagcaaaaga  
10501 tattctatat tggtaaac atcttcttca aaatttaaac tatccaagct ctcaaaacc  
10561 tcaaaaacac tataaaaatc aaaaatttta gccaaagctg aagtggtgca aatttttgca  
10621 aaatgattaa aatttatatt tttctttttt aaaagtattt ttatagtata attttagcaa  
10681 atttttaaag gattgtgctt gcaaatttca gatttaaaaa aagaaataat tttaaaaaaa  
10741 ggcaccttgc attttgactt taccgctagt gctttggcat taaaatgtgt agaaaaagaa  
10801 attgcaaaaa tactgccaag ttatgcaaat actcattctg acagctcctt aaactctttt  
10861 aaaactcaac aaatttacga acaagcacgc aaagatatca aaacaagtct taatctaagt  
10921 gatgaatttg cacttattgc ttgtggatca ggctctagca gtgctattaa aaaatttcaa  
10981 gaattacttg gaatttatat cccaccactt gttaaagaaa agtattttga aaaggtagat  
11041 aaaagcacc tacccttagt tatcgtaggg ctttatgaac atcattctaa cgaactttcc  
11101 ttccgtgaag gtttgtgcga atgtataaga attcccctag ataaaaagg aaacatagac  
11161 tttgaaatt tagaaaaagt tttaaaagaa aatcaacaca gaaaaattat cgctagtttt  
11221 tccctagctt caaatgttac aggtatatta agtgattata aacgcatttc taaattagtg  
11281 cgtaaattta aaggcatagt tgcttttgat gcatcaagct ttatccctta taaaaacata  
11341 gcttgcaagt attatgatgc tttatttata agctctcata aattaatcgg gggtatagga  
11401 ggctctggtc ttttagcaat caaaaaagaa ctttgcggaa acaaaccaag ctttgcgca  
11461 ggaggaactg tgggttatgt ttcgcmgacc tctcaatggt atctttgcaa tgaagaggct  
11521 ttagaagaag gagggactcc tggaaattta caactaattc gtgcmgactt ggcttttaaa  
11581 ataaaagatg aaataggcat agaagaaata gaaaaaaaag aagaaatttt aaaagaatac  
11641 ttctttgaaa aactaaaaac tatacctcat ttaatcctat atgctaataa tataaaagct  
11701 cmcttaccca tctttgcttt taatattaaa aacatttctc cttttgactt agcctatgag  
11761 ctaagtaaaa aataccacat agaaacacgc gcmggctgtg cttgtgctgg tcttatggg  
11821 catgatttac taggcttaaa agataatgaa gaattaaaaa ctaaaccagg ttggctaaga  
11881 attagtttac attatactca cgaaaaagaa gatattgact acttctttga agcactgcaa  
11941 aaaagtataa taaaattgaa attttaatga tggcmgagcm gacggggctc gaaccgcmga  
12001 cctccgcmgt gacagggcmg cattctaacc agctgaacta cmgctgcmcc caagaagtaa  
12061 taatttaatg gtggctacta taagactcga acttatgaca tccaccttgt aagggtgcmg  
12121 ctctaccaac tgagctaagc gaccttaatt tttggcmgacc cctagaggat ttgaaactct  
12181 gttccacac agagagagt ttgtcctggg ccactagacg aaagggtcta aaccgataa  
12241 gtgggtgctc gtgttgatt cgaaccaacg gcmccctct taaaaggag atgctctacc  
12301 ggctgagcta acgagacata tggcmgagcm gacggggctc gaaccgcmga cctccgcmgt  
12361 gacagggcmg cattctaacc agctgaacta cmgctgcmcc caagaagtaa taatttaatg  
12421 gtggctacta taagactcga acttat

LOCUS IKNDEOKD\_3 4643 bp DNA linear 12-APR-2021  
 DEFINITION Campylobacter species strain strain.  
 ACCESSION  
 VERSION  
 KEYWORDS .  
 SOURCE Campylobacter species  
 ORGANISM Campylobacter species  
 Unclassified.  
 COMMENT Annotated using prokka 1.14.6 from  
<https://github.com/tseemann/prokka>.  
 FEATURES Location/Qualifiers  
     source 1..4643  
         /organism="Campylobacter species"  
         /mol\_type="genomic DNA"  
         /strain="strain"  
     gene complement(3..755)  
         /locus\_tag="IKNDEOKD\_00049"  
     CDS complement(3..755)  
         /locus\_tag="IKNDEOKD\_00049"  
         /inference="ab initio prediction:Prodigal:002006"  
         /inference="similar to AA sequence:RefSeq:CKG86653.1"  
         /codon\_start=1  
         /transl\_table=11  
         /product="hypothetical protein"  
         /protein\_id="Prokka:IKNDEOKD\_00049"  
         /translation="MIRVIYLDGLERLIDESKNFRIKNKNSQFERFKMKYKVLNKEHM  
         NFYFYDIPYELGKKISKYYEMHLFLQIPNLKKTIDILELFEMTILTSFDNEAEMDETIF  
         ADYLFDFSPLYLANHYADDYVAIVGQLFLDDCIDFWRCAYHKMDNANTKTPNLSQYK  
         KENKYETWKYFRDNYIYSYNDNLVNHATKGFDFWGNLDNWDMPYNINCFRTQKGTKYLNE  
         ILAPKFYNYKDLEVEIDDKGNIIRWIGKINR"  
     gene complement(709..1467)  
         /locus\_tag="IKNDEOKD\_00050"  
     CDS complement(709..1467)  
         /locus\_tag="IKNDEOKD\_00050"  
         /inference="ab initio prediction:Prodigal:002006"  
         /codon\_start=1  
         /transl\_table=11  
         /product="hypothetical protein"  
         /protein\_id="Prokka:IKNDEOKD\_00050"  
         /translation="MAIGKVIHKYGSFFPDFDEIFYNLGYDGICFDEKSDIKLFLQIP  
         NLKKTIDILEYFEDHFLGSIFEDACEFNDLDCPLFYTEDENLKNSIKPNYNSEYLSIIG  
         QLFLAGYIDFGITPRSEDKYTRTDYPTNLSYYKEDKYQAWIYFRDNFFYTNAFLKGY  
         DDILIIYKGKEYTANTLPKLLKGETIYSTMHAASWDMPRYWGSYNIWVTRTQKGTKYL  
         REILEPRVYNYKDLEVEIDDKGNILRWIGEINR"  
     gene complement(1477..2214)  
         /locus\_tag="IKNDEOKD\_00051"  
     CDS complement(1477..2214)  
         /locus\_tag="IKNDEOKD\_00051"  
         /inference="ab initio prediction:Prodigal:002006"  
         /inference="similar to AA sequence:RefSeq:CKG86653.1"  
         /codon\_start=1  
         /transl\_table=11  
         /product="hypothetical protein"  
         /protein\_id="Prokka:IKNDEOKD\_00051"

```

/translation="MKYKYIKWNKEEKCAIFFPDIDYSLWKKTQLKENVYNNPSLIIS
SCLITKMDILELFEYYILFICGKSMGTSRWEENLILLDTYNIDNLSNPFSLNTPKPT
YISEYINILGQLFLAGYIDFGSYCDEEDRNKIDYPSNLSYYKEDKYQAWIYFRDNFFY
QDKFIRDLDNPETLDEDEGYSLILGDISWDTPQYWSQYNIWVATTPKGTKYFNEILAPK
FYNKYKDLEVEIDDKGNVLRWIGEINR"
gene      complement(2204..2971)
          /locus_tag="IKNDEOKD_00052"
CDS       complement(2204..2971)
          /locus_tag="IKNDEOKD_00052"
          /inference="ab initio prediction:Prodigal:002006"
          /inference="similar to AA sequence:RefSeq:APA51619.1"
          /codon_start=1
          /transl_table=11
          /product="lysozyme"
          /protein_id="Prokka:IKNDEOKD_00052"
          /translation="MQKIDFEIAKGLDERLDNENVCCFNVTYKDYFNANDKDM LISDN
IKDDTNTTQAHINENYNAQELIPDNVIRIQTQDGSGEFIEIVFDEFKEWEKSSSGAI
KPLFTPLEGIVEDISNSLENVSIIGDTLAMLGAVKNPKNAKNIKKKSLTRDEVLQIV
DKLPKNVRDKCRRIVENKEELDKLWKKLTKNSKELENKVDDKYGQSIYMRKLDQITII
QYKKASKSGGETIEINSNKPRGNLRTIHIENGVKNEV"
gene      complement(3271..3741)
          /locus_tag="IKNDEOKD_00053"
CDS       complement(3271..3741)
          /locus_tag="IKNDEOKD_00053"
          /inference="ab initio prediction:Prodigal:002006"
          /codon_start=1
          /transl_table=11
          /product="hypothetical protein"
          /protein_id="Prokka:IKNDEOKD_00053"
          /translation="MQIPIYSKLLKAKLESKGIDNISSGQIAWFVCSLILALVTYIILT
FHYYIYISYGKYDKNFLLLIFDRNAMELFIIIYSCIMFNLLYIYNAIPLVLSAVFIFLA
FYFSSLSLFIVGCCGMGVFFLISIFKRKLIPSVLLFAMGYICSYLLLLHAIGTYH"
gene      complement(3951..4100)
          /locus_tag="IKNDEOKD_00054"
CDS       complement(3951..4100)
          /locus_tag="IKNDEOKD_00054"
          /inference="ab initio prediction:Prodigal:002006"
          /inference="similar to AA sequence:RefSeq:AAW35443.1"
          /note="conserved domain protein"
          /codon_start=1
          /transl_table=11
          /product="hypothetical protein"
          /protein_id="Prokka:IKNDEOKD_00054"
          /translation="MKEKIDKLRDYAELAQASYFYFDLKG YILQENETIVILNELVSL
SYNGN"
gene      complement(4110..4415)
          /locus_tag="IKNDEOKD_00055"
CDS       complement(4110..4415)
          /locus_tag="IKNDEOKD_00055"
          /inference="ab initio prediction:Prodigal:002006"
          /codon_start=1
          /transl_table=11
          /product="hypothetical protein"
          /protein_id="Prokka:IKNDEOKD_00055"

```

/translation="MGVFRKFYIVWVFCISGFAISPAVGHNPNRVYEFFVMLGWIFF  
PLILLMLYRFFSLCEIKFLYIALLLLLLYPIALILYYMFYHNSFYVTLYIFLSLFK"

ORIGIN

1 actcatctat taatctttcc tatccatctt ataataattac ccttatcatc aatttctact  
61 tctaaatctt tgtatttggt ataaaattta ggagctaaga tttcattgag atattttgtg  
121 cctttttgag tgcgaaagca attgatatta tacatatccc aattatccaa attcccccaa  
181 aaatcgcctt ttgttgcattg atttactaaa ttatcattat aagaataaat ataattatct  
241 ctaaaatatt tccaagtttc atatttattt tctttttgtt attgcgataa attaggagtt  
301 tttgtatttg cattgtccat tttatgggat gcacaacgcc aaaaatcaat acaatcatct  
361 aaaaaagtt gtccatacat agctacataa tcatccgcatt aatgatttgc taatttatat  
421 aaatttgaaa aatcaataa ataatacagca aaaattgttt catccatttc tgcttcgtta  
481 tcaaaacttg tcaaaattgt ctttcaaac aattctaaaa tatctgtttt ttttaaggttt  
541 ggaatttgta gaaaaagggt ctttcatag tatttactta tttttttacc taactcataa  
601 gggatatcgt aaaaataaaa attcatatgc tctttattta atactttata tttcatctta  
661 aatctctcaa attgtgaatt tttgtttttg attctaaaat ttttagattc atctattaat  
721 ctctccaatc catctaagta tattaccctt atcatcaatc tctacttcta aatctttgta  
781 tttgttataa actctagggt ctaaaatctc acggagatat tttgtgcctt tttgagttct  
841 tgttaccat atattatacc cactccaata tcttggcata tcccaagaag cagcactatg  
901 cattgtacta taaatcgttt ctctttttt aagtttgggt agagtatttg ctgtatattc  
961 tttgccttta tagattaaat tatcgtcata atatacctttt aaaaatgcat tagtataaaa  
1021 gaaattatct ctaaaatata tccaagcttg atatttatct tctttataat aagataaatt  
1081 agtaggatag tctgttcttg tatatttatc ttccgatctt ggagtaatcc caaagtctat  
1141 atacctgct aagaatagtt gccctataat acttagatac tcgctattgt aatttggttt  
1201 tatggaattt ttttaagtttt catcttctgt gtaaaacaaa ggacaatcca agtcattaaa  
1261 ttcgcatgca tcctcaaaaa ttgatcctaa aaaatgatct tcaaaatatt ctaaaatatt  
1321 tgttttctta aggtttggaa tttgtagaaa aagctttata tctgattttt catcaaaaca  
1381 aataccatca taacctaat tgtaaaatat ctcatcaaaa tcagggaaaa acgaaccgta  
1441 tttatgaatt actttacca tcgccatttt tatctttcat ctattaatct ctccaatcca  
1501 cctaagcaca ttacccttat catcaatctc tacttctaaa tctttgtatt tattataaaa  
1561 tttaggagct aagatttcat taaaatattt tgtgcctttg ggggttgggt ctaccagat  
1621 attgtattgt gaccaatatt gtgggtgatc ccaagaaata tcacctaaaa taagactata  
1681 tccatcctca tctaattgtt caggattgtc caaatctcta ataaatttgt cttgataaaa  
1741 gaaattatct ctaaaatata tccaagcttg gtatttatct tctttataat aagataagtt  
1801 tgagggatag tctattttat ttctatctt tcatcgcaa taagaaccaa agtctatata  
1861 tcctgctaag aatagttgtc ctaagatgtt tatataattca cttatatagg taggcttggg  
1921 cgtattttaa gagaaagggt tgctaagatt gtcaatgtta taagtatcca ataaaattaa  
1981 attattacat tcccatcttg atgtgcccatt gctttttccg caaataaata aatataata  
2041 ctcaaaatac tctaaaatat ccatttttgt tatcaggcaa gaagatataa ttaaagaggg  
2101 attattgtag acattttctt ttaattgtgt tttcttccat aagctataat ctatatcagg  
2161 aaaaaatata gcacattttt cttctttatt ccatttgata tatttatact tcatttttca  
2221 cccattttc tatatgtatt gttctaagat ttctcttgg tttgttagaa tttatctcta  
2281 tggctctgcc tccattttta gaagcttttt tatattgtat aatagtttga tcatctaatt  
2341 ttctcatgta aattgattgt ccgtattttt tatctacttt attttctaac tctttagaat  
2401 ttttagttaa ctttttccat aatttgtcca attcttcttt gttttcaact attcttctgc  
2461 atttatctcg gacatttttt ggcagttttat ccactatctg caacacttca tcccttgta  
2521 atgacttttt cttaataata ttttttgcatt ttttaggatt tttcactgca ccaagcattg  
2581 ctaaggatc accgataatg ctgacatttt caagtgaatt tgaaatatct tccactatac  
2641 cttctaattg ggtaataaaa ggctttatag ctccgcttga tgatttttcc cattctttaa  
2701 attcatcaaa tactatctca ataaactctc cactgccatc ttgtgtttgt attcttataa  
2761 cattatcagg gatgagttct tgagcattgt tatagttttc attgatgtga gcttgtgtgg  
2821 tatttgtatc atcttttata ttatcactta taagcatatc tttatcattt gcattaaaat  
2881 aatctttagt ataaacatta aagcaacaca cttttcatt atcaagccgc tcatctaac  
2941 cttttgcaat ttcaaaatca atcttttgca ttttagcagg agttaaaaaa actccagttc  
3001 caaaaccca aaaaccatca ttaaactcat taggctcttt agcttcatac catttttcat

```

3061 ctatcttgtc ccattctttg tttttaaaat attcttgtct taattcttta tctatcttat
3121 ctaactcatc aggacttttg tctttggtaa gtcctaaaaa ggcgtgggta aaatcttctc
3181 tttaccaata acactgattt ttaaaatcca aaaaaacatt ctaccaatgg atcaatataa
3241 attgttacat aatacttcat ttataaaatc ctaatgataa gttccaattg catgaagtaa
3301 gagatatgag caaatataac ccatagcaaa caacaaaacg ctaggtataa gttttctttt
3361 gaaaatggat attaagaaaa atactcccat gccacaacaa ccaacaataa acaagcttaa
3421 actagaaaaa taaaatgcca aaaatataaa tactgcagat aaaaccaaag gaatggcatt
3481 gtaaataat aatagattaa acattataca agaataatata ataataaata attccattgc
3541 atttctatca aatattaata aaaataaatt cttatcatat ttaccataac taatgtaaat
3601 gtagtgaaa gttagaataa tataagtac caaagcaaga atcaaaactac acacaaacca
3661 agcaatttgc cactcgata tattgtctat tcctttactt tctagttttg ctttgagttt
3721 agaataaata ggaatttgc aatttactcc taatataaca agttattcta ttataaaata
3781 atttatttaa aaatttgatt gtttcagtaa gaaaaaattt cttgaaatca ttattaaatt
3841 cacaaggctc tttagcttca tttatcttat ttacttattc taaaagagga aaaaattgga
3901 taatgtcatt aaaagatagg gctatgtctt gaaccgagtc aataaaatta tcagtttccg
3961 ttataactta aacttacaag ctcatcttaa ataacgatag tttcattttc ttgtaatata
4021 taacccttta aatcaaaata aaaataacta gcttgtgcaa gctcggcata atctcttagc
4081 ttatcgattt tttctttcaa aattatcctt tatttaaata atgataaaaa aatatataat
4141 gtaacataaa aactattatg ataataaaac atgtaataca atatcaaagc tataggataa
4201 taaagtaaca atagcaatgc tatatacaaa aactttattt cacaaagaga aaaaaagcga
4261 taaagcatta atagaattaa agggaaaata atccaaccta gcattacaaa aaattcatal
4321 actctatttg gattatgcc tacagcagga gaaatagcaa atccacttat acaaaatact
4381 acccaaaca tataaaactt acgaaataca cccatttatt ttccttttta atatcttttag
4441 taaattttct acttttttaa aaattaaaat aaaaataact agcccatgca agctcggcat
4501 aatctcttag ctatttgatt ttttctttca aaattatcct ttatttaaataaat atgataaaaa
4561 aatatataa tgtaacataa aaactattat gataataaaa catgtaatac aatatcaaag
4621 ctataggata atacaataat atc

```

//

LOCUS IKNDEOKD\_4 1042 bp DNA linear 12-APR-2021

DEFINITION Campylobacter species strain strain.

ACCESSION

VERSION

KEYWORDS .

SOURCE Campylobacter species

ORGANISM Campylobacter species  
Unclassified.

COMMENT Annotated using prokka 1.14.6 from  
<https://github.com/tseemann/prokka>.

FEATURES Location/Qualifiers

```

source          1..1042
                 /organism="Campylobacter species"
                 /mol_type="genomic DNA"
                 /strain="strain"
gene            77..589
                 /locus_tag="IKNDEOKD_00056"
CDS             77..589
                 /locus_tag="IKNDEOKD_00056"
                 /inference="ab initio prediction:Prodigal:002006"
                 /inference="similar to AA sequence:RefSeq:A0H52017.1"
                 /codon_start=1
                 /transl_table=11
                 /product="ankyrin domain protein"
                 /protein_id="Prokka:IKNDEOKD_00056"
                 /translation="MIEYFFKKGCTFETYNEKHGSTPLHEWILCGEEVKYLEEALKLG

```

```

ANPNMRRIKTENKFSFSGAGETLLHRAAGSKEKPIGACVEVLIKYGADVNAVNCGICD
IEDGKIEYYDPATPLDEANTYDISKNIKILKKAGAKTWEELVEEYNIDTSLERIEQIK
MYEERRKDKK"
gene      601..894
          /locus_tag="IKNDEOKD_00057"
CDS       601..894
          /locus_tag="IKNDEOKD_00057"
          /inference="ab initio prediction:Prodigal:002006"
          /codon_start=1
          /transl_table=11
          /product="hypothetical protein"
          /protein_id="Prokka:IKNDEOKD_00057"
          /translation="MDFNTDILESLDNFKAFLDTKPSKELLKAVKNYIDDFMEGAYDN
LDPENYEVAFEEDTGIPYDEADEDEFEDWFIKNVLYHDDLSEIYKILKSLVKD"

```

ORIGIN

```

1  acttaaagct gatgaagtac actttggata caatgcactc agtagatata tcgatagaga
61 tggaaaaaat aaagaagtga tagagtattt ttttaaaaaa ggatgcacat ttgaaactta
121 taatgaaaaa catggcagca ctcctttgca tgaatggata ctatgtggcg aagaagtgaa
181 gtatttagaa gaagctttaa aactaggagc aaatccta atgagaagaa ttaaaacaga
241 aaataaattt agcttttagt gtgcaggaga aacccttttg catagagctg caggaagtaa
301 agaaaagcct ataggagcct gcgtggaagt gctaatacaa tatggagctg atgtaaatgc
361 agttaattgt ggtatatgtg atattgaaga tgggaaaatt gaatattatg atcctgctac
421 cccattagat gaggccaaca cctatgat atagcaaaaat ataaaaatct taaaaaaagc
481 aggagctaag acttggaag aattgggtga agaataca atcgatacaa gcttagaaag
541 aatagaacaa attaaaatgt atgaagaaag aagaaaagat aaaaaataaa aggaaaaatt
601 atggatttta acacagatat tttagaaagc ttagataatt tcaaagcatt tttagacaca
661 aaacctagca aagaactttt aaaggcagta aaaaattata tagatgattt tatggaaggt
721 gcgtatgata atttagatcc agaaaactat gaagttgctt ttgaagaaga tactggcata
781 ccttatgatg aagcagatga ggatgaattt gaggattggt ttattaaaaa tgtgctttat
841 catgatgatt taagtgat ttataaaata ctaaaatcac ttgttaaaga ttaaaaacta
901 aatttataaa gaaagaaagg aaaaacaatg aaaacattag aagaattaat agctttagaa
961 gaaaaatata taaaagaatt atgttttaga ttttatgatc ttgttagaggc taacaaactt
1021 gaagaagtta aagaattttt aa

```

//

>>BfR-CA-15848\_min\_cov\_30 putative plasmid location

```

LOCUS      IHOPMAOI_1                21417 bp    DNA        linear      12-APR-2021
DEFINITION Campylobacter species strain strain.
ACCESSION
VERSION
KEYWORDS   .
SOURCE     Campylobacter species
  ORGANISM Campylobacter species
            Unclassified.
COMMENT    Annotated using prokka 1.14.6 from
            https://github.com/tseemann/prokka.
FEATURES   Location/Qualifiers
  source    1..21417
            /organism="Campylobacter species"
            /mol_type="genomic DNA"
            /strain="strain"
  gene      complement(124..432)

```

CDS /locus\_tag="IHOPMAOI\_00001"  
 complement(124..432)  
 /locus\_tag="IHOPMAOI\_00001"  
 /inference="ab initio prediction:Prodigal:002006"  
 /codon\_start=1  
 /transl\_table=11  
 /product="hypothetical protein"  
 /protein\_id="Prokka:IHOPMAOI\_00001"  
 /translation="MKNSKGEDIVKPKNTNTAYACAIQARFEQNKIVKIEPKYCISLI  
 NTCFDSKEITLDNDISRVLNDALSKRTIDFVNRFKLLKHKQPNTTNCMLMKKTKDKIKRN  
 "

gene complement(526..624)  
 /locus\_tag="IHOPMAOI\_00002"

CDS complement(526..624)  
 /locus\_tag="IHOPMAOI\_00002"  
 /inference="ab initio prediction:Prodigal:002006"  
 /codon\_start=1  
 /transl\_table=11  
 /product="hypothetical protein"  
 /protein\_id="Prokka:IHOPMAOI\_00002"  
 /translation="MSKNIKTQQAKLDLITKFLDYANIADASYAML"

gene complement(669..1271)  
 /locus\_tag="IHOPMAOI\_00003"

CDS complement(669..1271)  
 /locus\_tag="IHOPMAOI\_00003"  
 /inference="ab initio prediction:Prodigal:002006"  
 /codon\_start=1  
 /transl\_table=11  
 /product="hypothetical protein"  
 /protein\_id="Prokka:IHOPMAOI\_00003"  
 /translation="MLEFFVLLIFILIFFFVFIFSIILYFIFKIFYKLNKTKTIN  
 FKTIFKKFTLFLPVYLLFLVGGCSYKYMDPQYYEFRSLCKDIDNKVIIYNKAYWEI  
 FSNREKGNTMHDEKGEFFFNQKINKKIYFDFKSESINVLQKNKFTLTEVTFEDYDYG  
 IHYSTHLSYIYNDYGIFLGGDEGAGFYFRYHKRLYCEDVR"

gene complement(1291..1608)  
 /locus\_tag="IHOPMAOI\_00004"

CDS complement(1291..1608)  
 /locus\_tag="IHOPMAOI\_00004"  
 /inference="ab initio prediction:Prodigal:002006"  
 /inference="similar to AA sequence:RefSeq:CKG86955.1"  
 /codon\_start=1  
 /transl\_table=11  
 /product="methyltransferase small"  
 /protein\_id="Prokka:IHOPMAOI\_00004"  
 /translation="MDNKQQINKLRDMAELAQASYGYFHYVDNKFDIKDEDKIVTFED  
 VLDITYKNSKIIDEREFKIGTLKGFSPQLQAKQFFSRDYLKHCNPNTNSGFSATLSYE  
 KNR"

gene complement(1601..2029)  
 /locus\_tag="IHOPMAOI\_00005"

CDS complement(1601..2029)  
 /locus\_tag="IHOPMAOI\_00005"  
 /inference="ab initio prediction:Prodigal:002006"  
 /codon\_start=1  
 /transl\_table=11

```

        /product="hypothetical protein"
        /protein_id="Prokka:IHOPMAOI_00005"
        /translation="MKKYKKILVLLSPIILIIILFYTPFIYPSYWEFRGLCKLNNYPKS
        EEKYNTILAYFDKSLDGSIGKNGYAKIGYSNRIDLGVYIYYKPNPNKTLIFKNINKIY
        FRPIWKNYAPNIYGNENMDFRLKFDGEIDCRSLLGELDG"
gene    complement(2026..2130)
        /locus_tag="IHOPMAOI_00006"
CDS     complement(2026..2130)
        /locus_tag="IHOPMAOI_00006"
        /inference="ab initio prediction:Prodigal:002006"
        /codon_start=1
        /transl_table=11
        /product="hypothetical protein"
        /protein_id="Prokka:IHOPMAOI_00006"
        /translation="MQNIKKQIQTLKDENSELAWAAYGYFHLATSKAIE"
gene    complement(2117..2737)
        /locus_tag="IHOPMAOI_00007"
CDS     complement(2117..2737)
        /locus_tag="IHOPMAOI_00007"
        /inference="ab initio prediction:Prodigal:002006"
        /codon_start=1
        /transl_table=11
        /product="hypothetical protein"
        /protein_id="Prokka:IHOPMAOI_00007"
        /translation="MTYILLIIISTILSYLIFKCIYRIIFKSKSVSKFLVFLGSIG
        LIIFYYPYSYYLEPSFYKFKKEICKLDPFIYQANSGLDEEYYNKVLRYFDTDLDNMS
        KSYKKELGVTNDKKYSRYWFETWIDGRTEISFEIWFKSNIAIKDNIDFSIKPFFYASW
        RDLRPFPSGNEGTVYLSGDRLSCEFILSKSEYKKFKWKENNAKY"
gene    complement(2958..3731)
        /locus_tag="IHOPMAOI_00008"
CDS     complement(2958..3731)
        /locus_tag="IHOPMAOI_00008"
        /inference="ab initio prediction:Prodigal:002006"
        /inference="similar to AA sequence:RefSeq:AJK71138.1"
        /codon_start=1
        /transl_table=11
        /product="glutamyl-tRNA amidotransferase"
        /protein_id="Prokka:IHOPMAOI_00008"
        /translation="MKEINEEKKALSLLLDSNFDGLKNNKIIDYSLELLLLSYRLSKI
        SSMDTSNINQLRETLINKILDITAKLSMCKEYDEKEIIFKFKYCLCVFIDESLMKNELF
        INFWAHNTLTVRLFDETLGGNNFYDIASSWINNPFKFKDFLEFIYACLILGYKGYNE
        AKDRDEKIIHFCNNIATSLRPVYKTEEELAFNKAYKIGLEENIWQKFIRLYFKKLIII
        VPVLIVLGVLSFAIFNLETNNLKVDNNISVLIKNLTHIE"
gene    complement(3728..4309)
        /locus_tag="IHOPMAOI_00009"
CDS     complement(3728..4309)
        /locus_tag="IHOPMAOI_00009"
        /inference="ab initio prediction:Prodigal:002006"
        /inference="similar to AA sequence:RefSeq:AJK71139.1"
        /codon_start=1
        /transl_table=11
        /product="type VI secretion protein"
        /protein_id="Prokka:IHOPMAOI_00009"
        /translation="MSMSIKIHPEFLYEFLEFQGELAAFSNEESFLDFIPYKHDNLY

```



NTFLNMMNNLRLFLSKITSPKYFIAKTSINGNGFYDFIFDNSGILEDAEIYFAIRADV  
 TTEYLLNNFKIQSKIHTQSKIKNIVATQLEGLNVDQVPNIPSSIPYLNQVYVYKIDKR  
 DQLFKDFKNESIISMYLTNNIKNPDIIMWAVFQ"  
 gene 4319..6517  
 /locus\_tag="IHOPMAOI\_00010"  
 CDS 4319..6517  
 /locus\_tag="IHOPMAOI\_00010"  
 /inference="ab initio prediction:Prodigal:002006"  
 /inference="similar to AA sequence:RefSeq:AVS37497.1"  
 /codon\_start=1  
 /transl\_table=11  
 /product="type VI secretion protein VgrG"  
 /protein\_id="Prokka:IHOPMAOI\_00010"  
 /translation="MIKQTLGFYQDILHKEIDYSHIHFNYYEEQELISQYNESDLEFIT  
 RLAHNNGIFFYEDENTIIYFCDVYKVNKNKEIEYNPNVNNILNQACISSIYKEQSLRTN  
 AFTHSSINANTPLNLLSLHSSKVPYEQELNNKAYYNEHFYESEYSFTRSIDLKTKPTL  
 KEKRALVLNESLLAKSNIYHLSLGD FITLNYKEFNLSGLSDD EDTKSQDKASLLKDFI  
 IIANTQILIDDALLANSINTNDHLNLKDLNLSKSYSNTLTLLKKNIIFTPSFKAKPKA  
 PHNTQGIVIGESKDIESERNTIYTDEYGRVKVRINLYANQEELDNNLLSANIKTNTHE  
 NTNNTDSKDNTNFTNSSNHLPSNAYKSYHHTPFLRVATSIASNHS GFHTPRVGDEVI  
 VSFLDDDIDKPYVSSSLYNGTTTTPQYNYPRYKREIATNALSYSVAPAMIDKGLDTL  
 KLQENTDYELSSINNHYLTLANSTIGVDNADARARNEITLKNKDKKEEIIYILAQKDYK  
 EEIGNNYYEQTIKNNKTSEVGALYTEFITLGHMQNIIGFKNVNVGAEYLENTLLSKDTN  
 VGLNNTLNVGISNEVNIGQNHEEKIGNDRKVIINNNLEQDIKNDFIQRIGHNKNETIK  
 GSYVLQTNQSIKFYSKQDLSIETNDCFKA EADTFVVSFKAKKNC SFTADEVYTMANKES  
 FLTAQKQIVSRVGNTTITQTKDKIILQVGTTQVIIDSKGLRVQGGDLRAD"  
 gene 6584..7465  
 /locus\_tag="IHOPMAOI\_00011"  
 CDS 6584..7465  
 /locus\_tag="IHOPMAOI\_00011"  
 /inference="ab initio prediction:Prodigal:002006"  
 /inference="similar to AA sequence:RefSeq:A0H52011.1"  
 /codon\_start=1  
 /transl\_table=11  
 /product="ankyrin domain protein"  
 /protein\_id="Prokka:IHOPMAOI\_00011"  
 /translation="MKTLEELINFEENSSEEYLEELCLEFYDLVEANKLEEVKEFLKD  
 YPVPEIFFEKCYTPYWDRENKRAIIDTAITLACAGLAYDKSKSFEMMEYFESLGLKAD  
 EVHFGYNALSRVIDRDGKNKEVIEYFFKKGCTFETYNEESGDTPLHVWILLNHANYLE  
 EALKLGANPNMRSIKTENEF SFGAGETLLHQAAESDEKPIGACVEVLIKYGADVNA  
 NCRICDIEDGKIEYDPATPLDRANRARNVSKNIKILKKAGAKTWEELVEEYNI DTS  
 EEPEQIKMYEERRKDKK"  
 gene 7477..8346  
 /locus\_tag="IHOPMAOI\_00012"  
 CDS 7477..8346  
 /locus\_tag="IHOPMAOI\_00012"  
 /inference="ab initio prediction:Prodigal:002006"  
 /inference="similar to AA sequence:RefSeq:A0H52011.1"  
 /codon\_start=1  
 /transl\_table=11  
 /product="ankyrin domain protein"  
 /protein\_id="Prokka:IHOPMAOI\_00012"  
 /translation="MKTLEELIALEEKYLKELCLEFYDLVEANKLEEVKEFLKDYPVP  
 EIFFEKCYKAYDYKERAIIDTAITLACAGLAYDKSKSFEMMEYFESLGLKADEVHFG

YNALSRYIDRDGKNKEVIEYFFKKGCTFETYNEESGDTPLHEWILCGEEVKYLEEALK  
 LGANPNMRSIKTENKFSFGAGETLLHRAAESDEKPIGACVEVLIKYGADVNAANCRI  
 SDIEDGKISYYKPATPLDRANRTRNVSKNIKILKKAGAKTWEELVEEYNIDTSLERIE  
 QIKMYEERRKDKK"

gene 8358..8651  
 /locus\_tag="IHOPMAOI\_00013"

CDS 8358..8651  
 /locus\_tag="IHOPMAOI\_00013"  
 /inference="ab initio prediction:Prodigal:002006"  
 /codon\_start=1  
 /transl\_table=11  
 /product="hypothetical protein"  
 /protein\_id="Prokka:IHOPMAOI\_00013"  
 /translation="MDFNTDILESLDNFKAFLDTKPSKELLKAVKNYIDDFMEGAYDN  
 LPENYEVAFEEDTGIPYDEADEDEFEDWFIKNVLYHDDLSEIYKILKSLVKD"

gene 8681..9559  
 /locus\_tag="IHOPMAOI\_00014"

CDS 8681..9559  
 /locus\_tag="IHOPMAOI\_00014"  
 /inference="ab initio prediction:Prodigal:002006"  
 /inference="similar to AA sequence:RefSeq:AOH52017.1"  
 /codon\_start=1  
 /transl\_table=11  
 /product="ankyrin domain protein"  
 /protein\_id="Prokka:IHOPMAOI\_00014"  
 /translation="MKTLEELINFEENSSEEYLEELCLEFYDLVEANKLEEVKEFLKD  
 YPVPEIFFEKCYTPYWDRENKRAIIDTAITLACAGLAYDKSKSFEMMEYFESLGLKAD  
 EVHFGYNALSRYIDRDGKNKEVIEYFFKKGCTFETYNEESGSTPLHVWILLNHANYLE  
 EALKLGANPNMRRIKTENEFSGAGETLLHRAAGSKEKPIGACVEVLIKYGADVNAV  
 NCGICDIEDGKIEYDPATPLDEANTYDINKNIKILKKAGAKTWEELVEEYNIDTSL  
 EPEQIKMYEERRKDKK"

gene 9596..11527  
 /locus\_tag="IHOPMAOI\_00015"

CDS 9596..11527  
 /locus\_tag="IHOPMAOI\_00015"  
 /inference="ab initio prediction:Prodigal:002006"  
 /codon\_start=1  
 /transl\_table=11  
 /product="hypothetical protein"  
 /protein\_id="Prokka:IHOPMAOI\_00015"  
 /translation="MEFNDINFKIKEFESVDIISDYSLAFYLPKEEHMIGEKDQDGKI  
 RINKSNSLKYIEKINEEKEKEIEKLLQSNEKINEEFDKLDKDGALPTKEYKRKNYEYD  
 VFYDVYTSKDNINKCIKKIPIKNGVGTLSNFLRRFYENSVKGYNCKWCLIPRLIRN  
 KGESSFDPVPILNSSFVISELSNIKQKTLTFQRTIANVEHPSHFALQSPKEFKSMLEN  
 EQSFASYGGKEKQIEDLLKTAQHKLLETIKKANGISKTKEDLQEKQRKEIKKCKELKN  
 SKKKISPKLIGDTGEYVASLLFGKRSTRYLSNQRKLDANFNISFNHTIPDFLVSING  
 IPSLVEVKNVQVQSLTEQISFELKLAREYELDYIFVCNHYHTL TENVAGSAL TREEHE  
 ELARDDKGVGEFNKETRLLKAKVAEVLNEKDDL ANEEFIKSVSDGNKYLKEREK FY  
 KVASDVYIKNPIYKMGFEKLLQNQVVDINIVKDFLKDFAKRLGIDEKVLPIGYNPQR  
 GDSGTYDYTVNTLDLNPKASYVDFIDTIIHEFRHFYIYCIKNNSENSEIKLLYLDMVQ  
 FYISWNFYKIFNSYDKKCLIIDNEDETKKCLKNRTYYGSWKFLNPTLDLLPSPLYLQ  
 SSELDSRIMAYYFRKEIKL"

gene 11527..12792  
 /locus\_tag="IHOPMAOI\_00016"

CDS 11527..12792  
 /locus\_tag="IHOPMAOI\_00016"  
 /inference="ab initio prediction:Prodigal:002006"  
 /inference="similar to AA sequence:RefSeq:CKG88389.1"  
 /codon\_start=1  
 /transl\_table=11  
 /product="hypothetical protein"  
 /protein\_id="Prokka:IHOPMAOI\_00016"  
 /translation="MTPPSLPDVEKHEDFLQTRKEPYAIYLAINITNIKSYNNICPSEK  
 YFWKFDNMNELDKWYNPKFGIYLGKIVFDKKNKLIIPKYIAAKFENLEEEVKKIKNPL  
 WLANKNPNIIEPKFYDGMSSGGYFESPNNLEYQCKIEKDTQVLSQEQIISYVKELYSK  
 NTIIIKNYIDAINKDYGKPFVFSDEIYDELGEVGI L TKEQANNFKDKSYIKKDPILL  
 AMLDYLAQNKKDEDYLITFDDEYFYTYLVWSLKDFLLELSYGLFQDETELLFNPAAY  
 MDDTKIYYQNLNEEINKRYEKILLNMGFEGENGYFKDYYDYGFNGGIFEFISIYDYFA  
 YDEIGVQPIQQSPYVPPKSPFDSPNFVYSDGNYHGDACLVPALGKYYFELLYQKEIY  
 IELLRPYPSIKDLPEGWDNKMLEKANLK"

gene 13002..13694  
 /locus\_tag="IHOPMAOI\_00017"

CDS 13002..13694  
 /locus\_tag="IHOPMAOI\_00017"  
 /inference="ab initio prediction:Prodigal:002006"  
 /inference="similar to AA sequence:RefSeq:CKG88360.1"  
 /codon\_start=1  
 /transl\_table=11  
 /product="hypothetical protein"  
 /protein\_id="Prokka:IHOPMAOI\_00017"  
 /translation="MFFFKNYPQFAGKIAIYIRFDLINKEFLTSVSEKDKEFYLRDR  
 DGKYISTIINKILPLEYKNGKSFQFHTELLNNKNRDLKECKDFLKALQTLCKEFNL  
 PLENVVFYSQKPSGSL SFGAYEENKVRNLNQYILKAYFKEFAKTVFHECRHFYIEKYNN  
 HNMDALGRYVFYSEKAYINEKIIIFDKLSRICDPGENYLVGCNIGAIQDAYEIQPNERD  
 PRYVETLIGRSL"

gene 13707..14051  
 /locus\_tag="IHOPMAOI\_00018"

CDS 13707..14051  
 /locus\_tag="IHOPMAOI\_00018"  
 /inference="ab initio prediction:Prodigal:002006"  
 /codon\_start=1  
 /transl\_table=11  
 /product="hypothetical protein"  
 /protein\_id="Prokka:IHOPMAOI\_00018"  
 /translation="MKTIKIPLKDYISNIREDKTIYLGQLQSDMSIKGLDEEFLKKEYN  
 LKRNFKFETSIYLGKIIIEKNIIIFKAFNIDENCFEGLKELFFKNSPYKIVDNLELKK  
 YFLKLYKDNIIEF"

gene 14850..15125  
 /locus\_tag="IHOPMAOI\_00019"

CDS 14850..15125  
 /locus\_tag="IHOPMAOI\_00019"  
 /EC\_number="3.6.1.-"  
 /inference="ab initio prediction:Prodigal:002006"  
 /inference="similar to AA sequence:RefSeq:ABS44566.1"  
 /codon\_start=1  
 /transl\_table=11  
 /product="F-box only protein 18"  
 /protein\_id="Prokka:IHOPMAOI\_00019"

/translation="MDEAQDINACVIDIVLNQKQAKKVFIGDTFQSIYKFRGAVNSLE  
 ILASMPKSHTLYLTQSFRCQNIAFITNSYLKILNAPRDFKGTKKIK"  
 gene 15085..15723  
 /locus\_tag="IHOPMAOI\_00020"  
 CDS 15085..15723  
 /locus\_tag="IHOPMAOI\_00020"  
 /EC\_number="3.6.1.-"  
 /inference="ab initio prediction:Prodigal:002006"  
 /inference="similar to AA sequence:RefSeq:ABS44566.1"  
 /codon\_start=1  
 /transl\_table=11  
 /product="F-box only protein 18"  
 /protein\_id="Prokka:IHOPMAOI\_00020"  
 /translation="MLREISKEQKKSSNENVKNEAKAIVCRTNAKLFDAVENLDKKL  
 FFVGGINSYSFDELLDIQNL LFKKHEYIKNQFIVKFADLKELLEYINETKEVDLKQKI  
 FVLFKYVHGDIIKLIKAIEKSSVKKQEADLILSTGHKSKGLEWNNVEIIDDFLNIQK  
 ELEERDQITIAKEELNLLYVAITRAKNSLSISKDYLLLEKEFIQENLERIIIE"  
 gene 15720..15932  
 /locus\_tag="IHOPMAOI\_00021"  
 CDS 15720..15932  
 /locus\_tag="IHOPMAOI\_00021"  
 /inference="ab initio prediction:Prodigal:002006"  
 /inference="similar to AA sequence:RefSeq:AVL47291.1"  
 /codon\_start=1  
 /transl\_table=11  
 /product="helix-turn-helix domain-containing protein"  
 /protein\_id="Prokka:IHOPMAOI\_00021"  
 /translation="MKIIKKLQKDGSLKKQVYYSVQEVSQMHSVTHVTVRLWISRGIL  
 KGMKLGKGFYMSKETILDFQKTDGLS"  
 gene 16701..17621  
 /locus\_tag="IHOPMAOI\_00022"  
 CDS 16701..17621  
 /locus\_tag="IHOPMAOI\_00022"  
 /inference="ab initio prediction:Prodigal:002006"  
 /inference="similar to AA sequence:RefSeq:ADC28003.1"  
 /note="conserved hypothetical protein"  
 /codon\_start=1  
 /transl\_table=11  
 /product="hypothetical protein"  
 /protein\_id="Prokka:IHOPMAOI\_00022"  
 /translation="MEAKGIAIFPTNVAFSKKTNAFFTELEDQFLKEGVGNKSAIKLD  
 FEYYILYCQFLQIDKESLFFGRNYELVFCFLLYRALLNKNNTQKIVAKIINVIRCQD  
 RLPEKVHYREKIICMDNQHRDLSQTLSSCIAEFYNSIDLYNTFRKNIGFENRKKIAIE  
 MLNRASEHYGFFGLSRGGITYKEEKISCVPIQALDEFHHGMSHLCAVFLKEDGRYTNL  
 ERAIPHFKRGMMEVYKTIIRD FMILNKDALGVKQEALKIRELEYQTIGPKPTVTKNPT  
 TNLTNKKEEKVIPGYKELCEKIVSQIKNAK"  
 gene complement(17721..18749)  
 /gene="flgS"  
 CDS complement(17721..18749)  
 /gene="flgS"  
 /locus\_tag="IHOPMAOI\_00023"  
 /inference="ab initio prediction:Prodigal:002006"  
 /inference="similar to AA sequence:RefSeq:CAL34921.1"

```

/codon_start=1
/transl_table=11
/product="signal transduction histidine kinase"
/protein_id="Prokka:IHOPMAOI_00023"
/translation="MNENILKSLDSSEKETLQKGLQSLIEQTYIVENEYKILNENYNS
LRAMVDEIIEVLPALWILDKEKNIIILQNQEALKKPKLLDIISLEKNRDELEFENRFY
AVKIIAHNEKTIVSATDISDEKRNERLASMGSVAHLAHEIRNPIGSISLLASTLFSR
SELKNKHIVLEIQKAIARVERIVNSTLLFTKGVHINASEFNLELTEECESAINSYNY
SSQIDFEINFLDMKIYGDKALLSLVLQNLIIYNAIDAIEESEECENPKIKIQASCDEKNL
YIRVYDNGCEIKDENLVFEAFKTTKLKGNGLGLSLSKEIINAHKGELKFEIWPKNFYF
VLPLHYNS"
gene complement(18746..19567)
/locus_tag="IHOPMAOI_00024"
CDS complement(18746..19567)
/locus_tag="IHOPMAOI_00024"
/inference="ab initio prediction:Prodigal:002006"
/inference="similar to AA sequence:RefSeq:CAL34920.1"
/note="conserved hypothetical protein Cj0792"
/codon_start=1
/transl_table=11
/product="hypothetical protein"
/protein_id="Prokka:IHOPMAOI_00024"
/translation="MAKIFDFYSVFEGFESLDSLNFEEVDVFNIEYLLLKNYLDIKDC
FKLDETASYALSLLAKNNRKRFSINRKIQHFKALSTLKYLLRAGIIKLEYSKEAKRVR
DKRQKLKKELRSYVIQDKIIFANQFTRFFFFYFLKPNEKLILQNRVEEVLTLIKEKFEL
YQSFQFEQLSRELLEKFKQVSGVQSYWDKNLELDLYYKDDKISFIGEVKFKNKKICRN
ILNLELAKSLKLEPNYIIISKNGFSKEFYKICKQDLLLLLDLNDFKILLEENK"
gene 19671..20939
/locus_tag="IHOPMAOI_00025"
CDS 19671..20939
/locus_tag="IHOPMAOI_00025"
/inference="ab initio prediction:Prodigal:002006"
/inference="similar to AA sequence:RefSeq:CAL34919.1"
/codon_start=1
/transl_table=11
/product="putative aminotransferase"
/protein_id="Prokka:IHOPMAOI_00025"
/translation="MQISDLKKEIILKKGTLHFDFASALALKCVEKEIAKILPSYAN
THSDSSLNSFKTQQIYEQARKDIKTSLNLSDEFALIACGSGSSSAIKKFQELLGIYIP
PLVKEKYFEKVDKSTLPLVIVGPYEHHSNELSFREGLCECIRIPLDKGNIDFEILEK
VLKENQHRKIIASFSLASNVTGILSDYKRISKLVKFKGIVAFDASSFIPYKNIACKY
YDALFISSHKLIGGIGGSGLLAIKKELCGNKPSFAAGGTVGIVSRTSQCYLCNEEALE
EGGTPGILQLIRASLAFKIKDEIGIEEIEKKEEILKEYFFEKLKTIPHLILYANNIKT
RLPIFAFNIKNISPFDLAYELSKKYHIETRAGCACAGPYGHDLGLKDNEELKTKPGW
LRISLHYTHEKEDIDYFFEALQKSIKLF"
gene complement(20943..21019)
/locus_tag="IHOPMAOI_00026"
tRNA complement(20943..21019)
/locus_tag="IHOPMAOI_00026"
/product="tRNA-Asp"
/inference="COORDINATES:profile:Aragorn:001002"
/note="tRNA-Asp(gtc)"
gene complement(21041..21116)
/locus_tag="IHOPMAOI_00027"

```

tRNA complement(21041..21116)  
 /locus\_tag="IHOPMAOI\_00027"  
 /product="tRNA-Val"  
 /inference="COORDINATES:profile:Aragorn:001002"  
 /note="tRNA-Val(tac)"

gene complement(21125..21200)  
 /locus\_tag="IHOPMAOI\_00028"

tRNA complement(21125..21200)  
 /locus\_tag="IHOPMAOI\_00028"  
 /product="tRNA-Glu"  
 /inference="COORDINATES:profile:Aragorn:001002"  
 /note="tRNA-Glu(ctc)"

gene complement(21214..21289)  
 /locus\_tag="IHOPMAOI\_00029"

tRNA complement(21214..21289)  
 /locus\_tag="IHOPMAOI\_00029"  
 /product="tRNA-Lys"  
 /inference="COORDINATES:profile:Aragorn:001002"  
 /note="tRNA-Lys(ttt)"

gene complement(21293..21369)  
 /locus\_tag="IHOPMAOI\_00030"

tRNA complement(21293..21369)  
 /locus\_tag="IHOPMAOI\_00030"  
 /product="tRNA-Asp"  
 /inference="COORDINATES:profile:Aragorn:001002"  
 /note="tRNA-Asp(gtc)"

ORIGIN

```

1  tgttttattt  ttttaatttat  aaaaaatttt  aaagataaaa  tataaaataa  tagaaaatat
61  aaaaacaaaa  aagaaaaata  taagaataaa  tattaaaaga  ttaacaaaga  attctagcat
121 ttattaattc  ctcttaattt  tatctgtttt  tttcataaga  caatttgtag  tgttgggctg
181 atgttttaaa  agtttaaattc  tatttacaaa  atcaatagtt  cttttactca  gtgcatcatt
241 caatcctacc  ctactaatat  cattatccaa  tgttatttct  ttactatcaa  aacaagtatt
301 tataagagaa  atacaatatt  taggttctat  tttactatt  ttattttggt  caaacgagc
361 ttgtatagca  caagcataag  ctgtgtttgt  atttttaggt  tttacaatat  cttctccttt
421 actatthttc  ataacaatat  cttgctttta  tttatcacca  aaagtaagtt  tatctgcttt
481 ataaatatta  ttctthttat  cttgctctat  attttcccaa  acatattaca  acatcgcata
541 actagcatct  gctatattag  catagtctaa  aaatttagtg  attaagtcta  atttagcttg
601 ttgtgtttta  atgtttttgc  tcatttggtt  ttccaaaaat  ctaaactctc  aattatcttt
661 ctaatthttt  atctaacatc  ttcacaatac  agtctthttt  gatatactaa  atagaatcca
721 gcaccctcat  cacctcccaa  aaatatacca  taatcattat  aaatataaga  taagtgtggt
781 gaataatgaa  taccatcata  ataacttca  aatgtaactt  ctgttaaagt  aaatthttt
841 ttttgcaaca  cattaatgct  ttctgatttt  ttaaaatcaa  aatatattht  tttatthttt
901 ttttgattaa  aaaagaattc  tcctthttca  tcatgcattg  tathttcctt  ttctctattg
961 ctgaatthtt  cccaataagc  tttattgtaa  attattactt  tattatctat  atctthtacac
1021 aagctcctaa  actcataata  ttgcggatcc  atatathttt  aagaacatcc  tcctactaag
1081 aataataaaa  gatatacagg  taaaagaaac  aaagtaaatt  tthtaaatat  tgtthtaaaa
1141 tttatagttt  ttgtthttat  tthtaattta  taaaaaattt  taaagataaa  atataaaaata
1201 atagaaaata  taaaaacaaa  aaagaaaaat  ataagaataa  atathaaaag  athaacaag
1261 aattctagca  tttattaact  cctcttaatt  ttatctgttt  ttttcataag  acaaagtagc
1321 agaaaaacct  gaatthgtat  taggacaatg  tthtaataaa  tcatagcgag  aaaagaattg
1381 ttttagcttg  agtggggaga  agtgcctttt  gagagtgccg  atthtaaat  ctctthcatc
1441 aataathttt  gagthttttt  aggtaatatc  taaaacatct  tcaaaggtaa  caatthtatc
1501 ttcactthtt  atatcaaatt  tattatcaac  gtaatgaaaa  tatccataac  ttgcctgtgc
1561 aagthctgcc  atatccctta  gthttattgat  ttgtthttta  ttatccatct  aactctccta

```

1621 ataagcttct gcaatctatt tcaccgtcaa actttaatct aaaatccata ttaccctcat  
1681 taccataaat atttgggtgca tagtttttcc atattgggtct aaaatatatt ttattaatat  
1741 ttttaaaaaat taatgttttg ttatttggat tcttataata aatatataca cctaaatcta  
1801 ttctattact ataacctatt tttgcataac ctttttttcc tatactacca tctaaactct  
1861 tatcaaaata agctaagatt gtattatatt tttcctcgct ttttgggtaa ttatttaatt  
1921 tacataacc tctaaattcc caataactag gatataataa aggggtataa aataatataa  
1981 ttaaaattat tgggtgataat agcactaaaa tctttttata ttttttcatt ctatcgcctt  
2041 agatgttgct aagtgaaaat atccataggc tgcccaagca agttctgaat tgccttttaa  
2101 tgtttgtatt tgttttttaa ttttttgcac ttttttcttt ccattctttg aattttttat  
2161 attcactctt gcttaatatt tcaaagcaac tcaatctatc tcctgaaaga tagactcctg  
2221 tcccctcatt acctgatgga aatgggcgta aatcacgcca agaagcataa aaaaaagggt  
2281 ttatactaaa gtcaatattg tcttttattg caatattact tttaaacat atttcaaagc  
2341 ttatttcgggt tcttccatct atccatgttt caaacagta tctactatat tttttatcat  
2401 tagttacccc tagctctttt ttatatgact ttgacatatt atccaaatcc gtatcaaaat  
2461 accttagcac tttattataa ttttctcat ctaatttacc actattggct tgataaatct  
2521 ctgggtctag cttacatatt tctttaaact tataaaagct tggctctaaa taataagaat  
2581 atggagtata ataaaagata attaaacctg tgcttccaag aaagactaaa aactttgaaa  
2641 cacttttttt agatttaaag atgattctat atatacactt aaaaattaga taagaaagaa  
2701 tagtagaaat tataataaga agtaatatat atgtcatggg ttatctcctt agactctcta  
2761 ttttattaaa attaagatgt aattttgtgg tttagtgtta gcagtataac tttttcttta  
2821 tcattaaaat aatagagctt gttttttcat atatttttat ccttttagatt tgcatttgat  
2881 ttttattcta gctgtaaaat aatttttatt taattttact cataacaaat aaattgatat  
2941 ttaaaaaattt aatatcttta ttctatatgt gttaaatttt ttatcaatac ggatatatta  
3001 ttatccactt taagattatt ggtttctaaa ttaaaaattg caaagcttaa tactcctaat  
3061 acaatcaata ctggcacaat gataataagt tttttaaact acaatcttat aaatttttgc  
3121 caaatatttt cttctaaacc aattttgtat gctttattaa aagctaactc ttcttctgtc  
3181 ttataaactg gtcttaaaga tgtggcaata ttattgcaaa aatggattat tttttcatct  
3241 ctatccttag cctcattata ttttcttta taaccaagaa tcaaacaagc ataaataaat  
3301 tcaaaaaaat ctttaaactt aaaaggatta ttaatccaag atgatgcaat atcataaaaa  
3361 ttatttccac ctaaggtttc atcaataat cttacagtta gagtattgtg agcccaaaaa  
3421 ttgataaaaa gttcattttt catcaagctt tcatctataa agacacaaag acaatatttg  
3481 aatttaataa tttctttttc atcatattct ttacacatgc ttagtttagc ggttatatct  
3541 aaaattttat taatcaatgt ttctctaagt tgattaatat tacttgtatc catagagctt  
3601 atttttgaaa gtctgtaaga aagcaaaagt aactccaag aataatcaat aattttattg  
3661 ttttttaaac catcaaaatt tgaatcaaga agtaagctta atgccttttt ttcttcgttt  
3721 atttctttca ttgaaatacc gccacatta taatatcagg attttttata ttgttgggtca  
3781 agtacatgct aataatactt tcatttttaa aatcttttaa cagctgatct cttttatcta  
3841 ttttataata aacataacca tttaaataag gaatactaga tggaatatta ggcacttgat  
3901 ctacatttaa gccttcaagc tgtgttgcta ctatattttt aattttactt tgcgtatgta  
3961 tcttgctttg aattttaaaa ttattaagta gatattctgt agtaacatct gcacgaattg  
4021 caaataaat ttcagcatcc tctaaaattc ccgaattatc aaaaataaaa tcataaaaaac  
4081 cattgccatt aatactggct ttagctataa aatatttagg acttgtgatt ttggaaaata  
4141 acaatcttaa attattcatc atatttaaaa aagtattata aagattatca tgtttataag  
4201 gaataaaatc taaaaaagat tcttcattac taaaagctgc aagctctcct tgaaattcta  
4261 aaaatttttc gtataaaaaat tcaggatgta tttttatact catactcata tcatagaagt  
4321 gattaaacaa acccttgggt tttatcaaga tatcttcat aaagaaatag attattctca  
4381 tatacatttt aattatgaag aacaagaact catctctcaa tacaatgaaa gtgatttaga  
4441 atttatcaca agattagctc acaataatgg aatctttttt tatgaagatg aaaacactat  
4501 ttatttttgt gatgtgtata aaaatgtaaa aaataaagaa attgagtaca atcctaattg  
4561 gaataatatt ttaaatcaag cttgtatttc ttctatctat aaagagcaaa gcttaagaac  
4621 taatgctttt acacattcta gtatcaatgc taatactcct ttaaatcttt tatctttaca  
4681 ctctagtaaa gttccttatg agcaagaact taacaacaaa gcttattata atgaacattt  
4741 ttatgagagt gaatattctt ttacaagaag tattgattta aagactaaac ctactcttaa  
4801 agaaaaaaga gccttgggtat taaatgaaag cttactagca aaaagtaata tttatcatct

4861 tagtttggga gattttatca ctttaaatta taaggaatth aatttgagtg gattgagtga  
4921 tgatgaagat actaaaagtc aagataaagc ttctttgctt aaagacttta ttattattgc  
4981 caatactcaa atcttaatag atgatgcttt actagctaata tctatcaata ctaatgatca  
5041 tttaaattta aaagatttaa atttaagtaa gtctttattct aatactttta ctttattaaa  
5101 aaagaatatt atctttactc caagttttta agctaagcct aaagcccctc ataatactca  
5161 aggtattggt ataggagaga gtaaagatat agaaagtgag agaaatacta tttatactga  
5221 tgagtatgga agggttaagg taaggattaa tctttatgct aatcaagagg aattagataa  
5281 taatctttta agtgcaaaca taaaaaccaa tactcatgaa aatacaaaaca atactgattc  
5341 taaagataat acaaacttca caaactcttc taatcattta ccaagcaatg cttataaatc  
5401 ttatcatcat actccttttt taagagtagc aacaagtata gcaagcaatc attcaggcct  
5461 ttttcatact ccaagagtgg gagatgaagt gattgtttct tttttagatg atgatataga  
5521 taaaccctat gtgagctcta gtttgataaa tgggactaca acaatgcccc aatataatta  
5581 tccaagatac aaaagagaaa tcgctacaaa tgcattgagc tatttaagcg tagctcctgc  
5641 tatgattgat aaaggtttag atacattaaa acttcaagaa aatactgatt atgaattaag  
5701 ctctataaac aatcattatc ttacttttagc aaattctaca ataggagtag ataatgccga  
5761 tgcaagagca aggaatgaaa ttaccctaaa aaacgacaaa gacaaagaag aaatttatat  
5821 cctagcacia aaagattata aagaagaat aggtataat tacgagcaaa ccataaaaaa  
5881 taataaaact tcagaagtgg gagccttata taccgaattt atcacttttag gacatatgca  
5941 aatatcata gtttttaaaa atgtcaatgt aggagctgaa tatctagaaa ataccttgct  
6001 ttctaaagat actaatgtgg gtttaataaa tactttgaat gtgggaatca gcaatgaagt  
6061 caatctgga caaaaccacg aagaaaagat aggaaacgat aaaagagtaa taatcaataa  
6121 caatctagaa caagatatca aaaatgattt tatccaaaga ataggacata ataaaaatga  
6181 aaccataaaa ggttcttatg tgcttcaaac caatcaaagt ataaaaatth attccaaca  
6241 agatctaagc atagaaacaa acgattgctt taaagctgaa gctgatactt ttgttagttt  
6301 caaagccaag aagaattgct cttttacagc cgatgaagtg tatactatgg caaataaaga  
6361 aagtttttta acagcaciaa acaaatgtt ttctagggtg ggaaatacaa ctatcacaca  
6421 acaaaaagat aagattatac tccaagtagg aacaacacaa gtgattatag atagtaaagg  
6481 ttttaagagt caaggaggtg atttaagagc agattaaaag caatthctt aaaattaaaa  
6541 ccaaatcat aaataaacct aatthacaat aaaaggaaaa acaatgaaaa cattagaaga  
6601 attaataaat tttgaagaaa attcttcaga agaatttht gaagaattat gtttagaatt  
6661 ttatgatctt gtagaggcta acaaacttga agaagtthaa gaatthttta aagactatcc  
6721 tgtacctgaa atattctttg aaaaatgcta tacaccttat tgggatagag aaaaacaaag  
6781 agctattatc gatactgcta tcacttttagc ttgtgcagga cttgcttatg ataaaagtaa  
6841 aagttttgaa atgatggagt atthtgaaag cctaggactt aaagccgatg aagtacactt  
6901 tggatacaat gcactcagta gatatatcga tagagatgga aaaaataaag aagtaataga  
6961 gtatthtttt aaaaaaggat gcacatttga aactthataat gaagaaagtg gcgatactcc  
7021 tttgcatggt tggatattgc taaatcatgc aaattthtth gaagaagctt taaaactagg  
7081 agcaaatcct aatatgagaa gtattthaac agaaaatgaa ttttagcttht gtggtgcagg  
7141 agaaaccctt ttacatcaag ctgcagaatc tgatgagaaa cctataggag cttgtgtgga  
7201 agtgctaatc aaatatggag ctgatgthaa tgcggctaat tgtcgcataat gtgatattga  
7261 agatgggaaa attgaatatt atgatcctgc aaccctattg gatagagcca acagagctcg  
7321 caatgtgagc aaaaatataa aatctthaaa aaaagcagga gctaagactt gggaagaatt  
7381 ggttgaagaa tacaatatcg atacaagctt agaagaacca gaacaaatta aatgtatga  
7441 agaaagaaga aaagataaaa aataaaaagga aaaacaatga aacattaga agaattaata  
7501 gctthtagaag aaaaatatct aaaagaatta tgtthtagaat tttatgatct tgttagggct  
7561 acaaaacttg aagaagtthaa agaattthtth aaagactatc ctgtacctga aatattctth  
7621 gaaaaatgct ataaagcata ttatgattat aaagaaagag ctattatcga tactgctatc  
7681 actthtagctt gtgcaggact tgcttatgat aaaagthaaa gttthgaaat gatggagtat  
7741 tttgaaagcc taggactthaa agccgatgaa gtacactthg gatacaatgc actcagtaga  
7801 tatatcgata gagatggaaa aaataaagaa gtaatagagt atthttthtth aaaaggatgc  
7861 acatthgaaa cttataatga agaaagtggc gatactcctt tgcataatg gatactatgt  
7921 ggcgaagaag tgaagtatth agaagaagct thaaaactag gagcaaatcc taatatgaga  
7981 agtattthaaa cagaaaataa atthtagctth agtgggtgcag gagaaacctt tttgcataga  
8041 gctgcagaat ctgatgagaa acctatagga gcttgcgtgg aagtgctaath caaatatgga



8101 gctgatgtaa atgcggctaa ttgtcgcata agtgatattg aagatggaaa aatcagctat  
8161 tataaacctg caacccatt ggatagagcc aacagaactc gcaatgtgag caaaaatata  
8221 aaaatcttaa aaaaagcagg agctaaaact tgggaggaat tggttgaaga atacaatatac  
8281 gatacaagct tagaaagaat agaacaatt aaaatgtatg aagaaagaag aaaagataaa  
8341 aaataaaagg aaaaattatg gattttaaca cagatatttt agaaagctta gataatttca  
8401 aagcattttt agacacaaaa cctagcaaag aacttttaaa ggcagtaaaa aattatatag  
8461 atgattttat ggaaggtgcg tatgataatt tagatccaga aaactatgaa gttgcttttg  
8521 aagaagatac tggcatacct tatgatgaag cagatgagga tgaatttgag gattggttta  
8581 ttaaaaatgt gctttatcat gatgatttaa gtgagattta taaaatacta aaatcacttg  
8641 ttaaagatta aaaactaat ttacaataaa aggaaaaaca atgaaaacat tagaagaatt  
8701 aataaatttt gaagaaaatt cttcagaaga atatttagaa gaattatggt tagaatttta  
8761 tgatcttgta gaggctaaca aacttgaaga agttaagaa tttttaaaag actatcctgt  
8821 acctgaaata ttctttgaaa aatgctatac accttattgg gatagagaaa acaaaagagc  
8881 tattatcgat actgctatca ctttagcttg tgcaggactt gcttatgata aaagtaaaag  
8941 ttttgaaatg atggagtatt ttgaaagcct aggacttaaa gctgatgaag tacactttgg  
9001 atacaatgca cttagtagat atatcgatag agatggaaaa aataaagaag taatagagta  
9061 ttttttttaa aaaggatgca ctttgaaac ttataatgaa gaaagtggca gcactccttt  
9121 gcatgtttgg atattgctaa atcatgcaaa ttatttagaa gaagctttta aactaggagc  
9181 aaatccta atgagaagaa ttaaacaga aaatgaattt agcttttagtg gtgcaggaga  
9241 aacccttttg catagagctg caggaagtaa agaaaagcct ataggagctt gcgtggaagt  
9301 gctaatacaa tatggagctg atgtgaatgc agttaattgt ggtatatgtg atattgaaga  
9361 tgggaaaatt gaatattatg atcctgctac tccattggat gaagctaata cttacgatata  
9421 aaataaaaa ataaaaatct taaaaaaagc aggagctaag acttgggaag aattggttga  
9481 agaatacaat atcgatacaa gcttagaaga accagaacaa attaaaatgt atgaagaaag  
9541 aagaaaggat aaaaaataag attaataagg caaagaacaa aaaaaggatt tttcattgga  
9601 atttaatgat ataaatttta aaatcaaaga atttgaaagt gtggatatca tcagtgatta  
9661 ttctcttgcc ttttatttgc ctaaagaaga gcatatgata ggagaaaaag atcaagatgg  
9721 taaaattcgc atcaataaaa gtaattcttt aaaatatata gaaaaaatca atgaagaaaa  
9781 agaaaaagaa attgaaaaac ttaaacttca aagcaatgaa aaaatcaatg aagaatttga  
9841 taaattaaaa gatggtgctt tacctactaa agaataataa agaaaaaatt atgaatacga  
9901 tgtattttat gatgtttata caagtaagga taatataaac aagtgcataa aaaaaatccc  
9961 gataaaaaat ggtgtaggaa cgctaaaatc aaatttctta cgaagatttt atgaaaattc  
10021 tgtcaagggt aagtataatt gtaaattggtg tcttatacct agactaatcc gcaataaagg  
10081 agaacttagt tttgatcctg tgcctatttt aaatagtagc tttgtcattt cagaattaag  
10141 caatatcaa caaaaaacc ttacttttca aagaacaata gccaatgtgg aacatccaag  
10201 tcattttgct ttacaaagtc ctaaggaatt taaaagtatg cttgaaaatg agcaaagctt  
10261 tgcttcttat ggtggcaaag aaaaacaat agaagatctt ttaaaaaccg cacaacataa  
10321 acttgaaacc attaaaaaag caaatggaat ttctaaaaaa accaaggaag atttacaaga  
10381 aaagcaaaga aaagaaatta aaaaatgcaa agaattaaaa aatagcaaga aaaaaatttc  
10441 acccaaactc ataggagata cgggagaata tgtcgcttct ttactttttg ggaaaagatc  
10501 tacacgctat ttaagcaatc aaagaaaact ggatgcta atttaatatct atagttttta  
10561 tcataccata cctgattttt tagtaagtat taatggtatt cctagtttag tcgaagttaa  
10621 aaatgttcaa gttcaaagcc taacagaaca aataagcttt gagctaaaac tggctagaga  
10681 atatgaactt gattacatct ttgtgtgtaa tcattataca catttaacag aaaatgtagc  
10741 aggaagcgca ttgactcgtg aagaacacga agagctagca cgagatgata aaggcaaagt  
10801 gggtagagttt aataaagaaa caaaaagatt gaaaaaagca aaggtggcag aagtcttaaa  
10861 tgaaaaggat gatttagcta atgaagaatt tattaaaagt gtaagtgatg gaaataagta  
10921 tttaaaagaa agggagaaat tttataaagt tgcttcagat gtttatatta aaaaccctat  
10981 ttataaaatg ggctttgaga aaaaacttca aaatcaagtt gttgatataa acattgtaaa  
11041 agatttttta aaggactttg ctaaaagact agggatagac gaaaaagttt tgcctgtaat  
11101 tggatataat cctcaacgag gggattctgg aacatatgac tatacagtaa atactttaga  
11161 tttgaatcca aaagcttctt atgttgattt tattgatacc attattcatg aatttaggca  
11221 tttttatatt tattgcataa aaaataattc tgaaaatagt atagaaaaat tgctttatct  
11281 tgatattgta caattttata tatcgtgga tttttataaa attttcaata gttatgataa

11341 aaaatgcttg atttatgata atgaagatga aacgaagaag tgtttaaaa atcgcacata  
11401 ttatggaagt tggaaatfff taaatcccac attagatctc ttgccaagtc ctttatacta  
11461 tcttcagtca agtgagttag actctaggat tatggcatat ttttttagaa aggaaattaa  
11521 attataatga ctccaccatc tttaccagat gtagaaaaac atgaagatff cttacaaacc  
11581 agaaaagaac cttatgctat ttatttagcc ataaacacaa acataaaaag ttataataat  
11641 atctgtccta gcgagaaata tttttggaaa tttgataata tgaatgaact tgataaatgg  
11701 tataacccaa aatttggcat atacctggc aaaattgttt ttgataaaaa agacaacaaa  
11761 ctcatcccaa aatatatagc cgctaaatff gaaaatffag aagaagaagt taaaaagata  
11821 aaaaatcctt tatggcctgc taataaaaa cctaattata ttgaacctaa atffttatgat  
11881 ggtatgagtg ggggttatta ttttgaaagt ccaaataatt tagagtatca atgcaaaata  
11941 gaaaaagaca ctcaagttff aagccaagaa caaatcattt cttatgtgaa agaactffat  
12001 agtaaaaaca caataataat aaaaaattat attgatgcaa tcaataaaga ctatggcata  
12061 aaacfftcg tatttagtga tgaatffat gatgaattag gagaagttgg cattcttaca  
12121 aaagaacaag ctaataatff taaagataaa agttatatta aaaaagatcc gatattgctt  
12181 gctatgcttg attatffagc aaaacaaaat aaaaagatg aagattatff aatcactff  
12241 gatgatgagt atffttatac ttatttggff tggagfftaa aagattffctt attagagctt  
12301 tcttatggff tgtffcaaga tgaaccgag cffctffffa atcctgcagc ttatatggat  
12361 gacacaaaaa tatattatca aaatffaac gaagaaataa ataagcgtta tgaaaaaata  
12421 ttgcttaata tgggatttga aggagaaaat ggttattffa aagattatta tgattatggc  
12481 tttggcaata atggatfftt tgaatffagc atatatgatt atfftgctta tgatgaaata  
12541 ggagtacaac caattcaaca aagtccatat gttccaccta aaagccfftt tgatagccct  
12601 aatfftgctt attctgatgg aaattatcac ggagatgcaa agcttgctcc tctgctffa  
12661 ggaaagtatt atfftgagct tttatatcaa aaagaaatff acatagaact tffacgccct  
12721 tattatccaa gcataaaaga tttgccagaa ggttgggaca ataaaatgct agaaaaagct  
12781 aatffaaaat aaaattatag atatgagctt tagagtagga gttggaaaag atgagagtg  
12841 aaaagaaagc aagctatgaa ataatfftaa caaatgta aaaaataatt agacgcctga  
12901 agacattatc taacaaaatt gtatffttag tgtffttgaa gctgtagagt tfftaaaagc  
12961 ttgtcaaagt tffaaagaag aaaaaatga aatagataat tatgtffttt tffcaaaaact  
13021 atcccaatt tgccgaaaa atcgcttata tatactatag atffgatffa atcaataagg  
13081 aatffffaac aagtgtatca gaaaaagata aggaatffta tcttcaagat agagacggca  
13141 aatatattag caccataatt aataaaatff tacffttgga atataagaat ggtaaaagtt  
13201 ttaacaatt ccacacagag cffttaaata acaaaaacag agatcftaaa gaatgtaaag  
13261 atffttffaa agctfftaact caaactcftt gcaagaatt taatffacct ttagaaaatg  
13321 tagtctffta tagccaaaag cctagtggat cfftatcatt tggagcttat gaagaaaata  
13381 aggtaagatt aatcaatac atfftaaaag cftatfftaa agaatffgca aaaacggff  
13441 ttcacgaatg taggcattff tatatagaaa aatattataa tcacaatatg gatgctctag  
13501 gcagatatgt tffttattct gaaaaagctt atatcaatga gaaaattatt tffgataaat  
13561 tgagtagaat ttgcgatcct ggtgagaatt atfftagtagg ttgcaatata ggtgctatc  
13621 aagatgctta tgaattcag ccaatgaaa gagatccaag atatgtagaa accctcatag  
13681 gtagaagttt ataatcaagg aaaataatga aaactataaa aataccgctt aaagattata  
13741 tctccaatat aagagaagat aaaactatff acttgggctt gcaaagtgat atgagtataa  
13801 aaggacttga tgaagaattc ttaaaaaaag aatataatct taagagaaat tffcaatffg  
13861 aaacaagcat tffttgggt aaaattataa tcaagaaaa aatatcatc tffaaagctt  
13921 ttaatattga tgagaattgc tffgaagggc ttaagaact tffcttcaaa aatagccct  
13981 ataaaattgt agataatffa gaatffaaaa aatattffctt aaaactffat aaagataata  
14041 ttgaatffta actcttata ttaatgaaat taatcaagtt catggtatta aactffacta  
14101 tattffacat ttaatgctff aaaattccaa gtcctcata aagcatgagt ttaatffaca  
14161 tagcattctt aaaactgcta taatcatctt tfftttgctt tffcttcta aaacattatt  
14221 tagccttata gtttattct cgctaagata atfftaactff tcttctgctt tffcagttff  
14281 aaacctaatt tffcatatc aaagctaaaa aggaataagt catcattatt atcacttata  
14341 aaaaagctag ttaatactct caaataagta atffgttct tfftgataat tffattgctat  
14401 tffttaaatt atffttccaa taatffagaa aatffaatcaa aaaagttgff tfftatatcat  
14461 ttatttgcatt tctatcctga taatctagta aatattccgc aagcttcaaa aatacaccta  
14521 taaaacaata aagtttctt taatataata ttatctatat aaataaaat tcatataatc

14581 cacatacaac atcagaaatt gataataaat atttatcttg atttatctta ttgatgtttt  
14641 taagttttat tccaacaatt tcataaaact ttggttttat tgtatttaat ttatcttcag  
14701 tgtaaaaaat ttatatTTTTg caattagTcc ttcaaacaat ttataaaatg caaaatctat  
14761 attttcaagt tctttgctat acaataaatt atttataact tcttttaatt caacttaca  
14821 aaccaaagct aaagtatgat tttatTTTTag tggatgaagc acaggatatac aacgcttgTg  
14881 ttatcgacat tGttcttaat caaaaacaag ctaaaaaagt ttttataggg gatacctttc  
14941 agagtattta taaatTTtaga ggagcggtaa attctTTtaga aatattagca tctatgcca  
15001 aatctcacac tttataccta acacaaagtT ttaggTgTcc gcaaaatata gcttttatta  
15061 ccaactctta tttgaaaatt ttaaTgctc cgcgagattt caaaggaaca aaaaaaatca  
15121 agtaatgaaa atgtcaaaaa cgaagcaaaa gccatagTgt gtagaactaa tgctaagTta  
15181 tttgatataG ccgtagagaa tttagataaa aaattatTTT ttgtagggagg gataaatagT  
15241 tatagtttGc atgagTtact agatatacaa aatcttcttt ttaaaaaaca cgaatatatc  
15301 aaaaaccaat ttatagTtaa gtttGctgat ttaaaggagc ttcttgaata tattaatgaa  
15361 actaaagaag ttgattTtaa gcaaaaaatc tttgttcttt tcaaatatgt gcatggcgat  
15421 attataaagc ttattaaagc cattgaaaaa agtagcGtaa aaaaacaaga gcaagctgat  
15481 ttaatcttaa gcacaggaca taagagcaaa ggcttGgaat ggaacaatgt tGaaattatt  
15541 gatgattttt taaacatcaa gcaagaactt gaagaaagag atcaaatcac catagcaaaa  
15601 gaagaattaa accttttata tgtggcaatc acaagagcca aaaattctct aagtattagc  
15661 aaagattact tgcttGaaaa agaattTata caagaaaatt tagaaaggat aataatagaa  
15721 tgaaaaaat taaaaatta caaaaagatg gaagccttaa aaagcaagtt tattattctg  
15781 ttcaggaggt ttcacaaatg cactcagtaa cgcatgtaac agttcgccta tggatttcaa  
15841 gaggaattct aaaaggtatg aaattaggca aaggatttta tatgtcaaaa gaaaccattc  
15901 ttgattttca gaaaactgat ggtttatcat aattaaggag agaaaaaatg acttttagta  
15961 gaaaagaatg tgctaaaatt cttgggatat ctttgcaaac tttagataga ttgacaaaag  
16021 ataaaaata aatcaatga atataactcg tttgtatta ttctcattg aagaaatagc  
16081 taaaattctc tcaggggcta agtcaacaaa atgaatagaa aagatagggt tgcactagct  
16141 gcttatcata aaaataaaaa gctcacttgc tttggtaagt gagtaattta aaagtatatg  
16201 ttaaagtata tGtttttttag atattTaat tttaaagtat ggatatttag atatttgatt  
16261 aataaatcac acgccgacct caggcaccat tgcttcttaa aatcataaaa ttccaaaaaa  
16321 attttattgt ttatatTTTgc tcgaaaaaat gcttctaaaa tagctgaaat atttatttat  
16381 agatattTaa aatattttta tataaataaa atatgcttta aattatgtta aatattTaat  
16441 tataaattat ttaaaaaata taagctcgct cccttaaaat aagataaaaa tagccctata  
16501 ttcttaata agactaaaa tGtatgatta aactTaaatt aaactaaaaat ttgatatagt  
16561 tcgcgcgatc aaaaaagttt aaataaaaaa ttaaaaagtc atagttattt aaactgaaac  
16621 atttgtgtta tttttcatag aaaatcataa tacaataaa gatctatata ccgaataact  
16681 aaaaaaaaaag ggggggggggt atggaagcaa aaggaatagc gatatttctt acaaatgttg  
16741 catttagtaa aaaaacaat gcttttttca ctgaattaga agatcaattc ttaaaagaag  
16801 gggtcggtaa taaaagtGcc ataaaactag attttgaata ttatatttta tattgtcaat  
16861 ttttacaat agacaaagaa tccctatttt ttggaagaaa ctatgaactt gtgttttGtt  
16921 tttacttta ttatagagct ttattaaata aaaacaatac tcaaaaaatc gtagcaaaaa  
16981 taataaatgt tatacgttgc caagatagat taccagagaa agtacactat agagaaaaaa  
17041 taatttGtat ggataatcaa cacagagatc tttctcaaac actaagttca tGtattgcag  
17101 aattttataa ttcaattgat ctatacaata ctttagaaa aaatatagga tttgaaaata  
17161 gaaagaaaat agcgatagaa atgtTaaatc gcgcatcaga aactatggT tttttggct  
17221 taagcagggg aggaataaca tataaagaag aaaaaatctc ttgcgtccct atacaagcat  
17281 tggatgagtt tcatcatggT atgtcgcacT tatgtgcagT tttcttaaaa gaagatggac  
17341 gatataccaa tctagaaaga gcgatccctc acttcaaagc tggaaTgatg gaagtataca  
17401 aaacaataat cagagatttt atgatattaa ataaagatgc tttaggagtc aaacaagaag  
17461 ccttaaaaaat aagagaatta gaatatcaaa ccataggaaa acccaaaaa gtaacaaaa  
17521 accctaccac aaacctaac aataaaaaag aagagaaggt tatccagga tataaagaac  
17581 tgtgcgaaaa aattgtcagT caaatcaaaa atgcaaagta aaatcggtat gaattgagct  
17641 tgagtatgca atttagctta tttgctatTT gcatacttag agccattctt tgaagaaatt  
17701 aaaacaatc ctatcataaa ttaactatta taatgTaaag gcaaaacaaa ataaaaattt  
17761 ttaggccaaa tttcaattt taattctctt ttatgagcat taatgatttc tttagaaagc

17821 gataggccca atccatttcc ctttaagttta gtagtcttaa aagcttcaaa aactaaatth  
17881 tcatctttga tttcacaacc attatcataa accctaagt ataaatthttt ctcatcacag  
17941 cttgcttgaa ttttgattht aggatthttcg cactcactth cttcgatcgc atctatggca  
18001 ttataaatca aatthttgcaa aaccaaagat aaaagtgcct tatctccata aatthttcata  
18061 tctaaaaaat taatthtcaaa atcaatthtga gatgagtaat tataagaatt tatagcactt  
18121 tcacactctt ctgttaattc taaaagatta aactcgcctg cattgatatg tacaccctta  
18181 gtaaaaagta aggtagaatt tacaatacgc tctaccctag caatagcctt ttgaatthtca  
18241 agcacaatat gtttgthttt aagctcacta cgagaaaaaa gcgtggaggc aagtaaggat  
18301 atagagccta tgggatthtct tatctcatgc gctaaatgtg ccgcaacact tcccatacta  
18361 gcaagtctth cattgcgtht ttcacgccta atatccgtag ctgaaactat ggtthtttca  
18421 ttatgagcaa taatthttaa cgcataaaat ctattctcaa attcaagttc atcacgattt  
18481 tthttcaagac tgataatc aagcaattht ggtthtttca aagcttcttg atthttgcaa  
18541 ataatathtt tthctthtat taaaatccaa agcgcactag gcaaaacctc gataatctca  
18601 tctaccatag cacgcaaaga attataatth tcgtthtaaa tthttatattc gthtttctaca  
18661 atataagtht gctctataag gctthtgaag cthttthtga gggthttctth ttcacttgag  
18721 tctagactth ttaaaatatt ttcgttcatt tathttctc taataaaatt ttaaaatcat  
18781 ttaaatccaa taaaagcaa tcttgthttac aaatthtata aaatthttht ctaaaacct  
18841 tthttgaaat aataataaa ttatthtgct ctagtthttaa agatthttgct tthtaattcta  
18901 aaagthttaa aatathttcta caathtttht tathttthaa tthtaacttca ccgataaaac  
18961 ttatctgtc atcctataa taaagatcaa gttctaaatt tthtcccaa taactthtga  
19021 cccactcac ttgaaattht tthttcaagta attctctgga aagthtgcctc aaacaaaaac  
19081 tthgataaag thcaaathtt tctthaatca aagthtaaac thcttcatag cgatthttgca  
19141 aaatcaactt thcattgggt tthtagaaat aaaaaagaa acgagtaaat tgattagcaa  
19201 agataattht atcttgatc acataagatc thaatcttht tthtaagtht thgtcgttht  
19261 ctcttaccct tthtgcctct thgtatact caagthttat aatccccgct cthaaaagat  
19321 atthttaaagt tgataaagcc thaaaatgct gaathtttct attgatagaa aaacgcttac  
19381 gattgthttt agctagcaag ctaagagcat aagaagcggc ctcatcgagc ttgaaacaat  
19441 cctgatatc taaatagtht ttgagcaaaa gatathctat attgtgaaat acatcttctt  
19501 caaathttaa actatccaag ctctcaaac cthcaaaaac actataaaaa thcaaaattht  
19561 tagccaaagc tgaagtgtg caathtttht caaatgatt aaathttata tthttcttht  
19621 thaaaagtat tthttatagta taathtttagc aaathtttht aggatthtgc thgcaatht  
19681 cagatthtaa aaaagaaata atthtthaaaa aaggcacctt gcathttgac thtaccgcta  
19741 gtgctthggc atthaaatgc gtagaaaaag aaattgcaaa aatactgcca agttatgcaa  
19801 atactattc tgacagctc thaaactctt thaaaactca acaathttac gaacaagcac  
19861 gcaaagatat caaaacaagt cthaatctaa gtgatgaatt tgcacttatt gctthtggat  
19921 caggctctag cagtgctatt aaaaathttc aagaattact tggathttat atcccgccac  
19981 thgtcaaaga aaagtathtt gaaaaggtag ataaaagcac cthaccctta gttatcgtag  
20041 ggccttatga acatattct aacgaactth cthtccgtga aggtthtgc gaatgtataa  
20101 gaathcccct agataaaaa ggaacatag actthgaaat thtagaaaa gthttthaaag  
20161 aaatcaaca cagaaaaatt atcgctagtt thtccctagc thcaaagtt acaggatat  
20221 taagcgatta taaacgatt tctaaattht tgcgtaaatt taaaggcata gtcgcttht  
20281 atgcatcaag cthttatccct tataaaaaa tagctthgcaa gtattatgat gctthattta  
20341 taagctctca taaattaatc gggggtatag gaggctctgg tctthtagca atcaaaaaag  
20401 aactthtgcg aaacaaacca agctthtgcg caggaggaac tgtgggttht gthttcgcga  
20461 cctctcaatg thtctthtgc aatgaagagg cthttagaaga agggaggact cthggaattht  
20521 tacaactaat tgcgcgagc thggctthtth aaataaaaga tgaataggc atagaagaaa  
20581 tagaaaaaaa agaagaatt thaaaagaat actthtthtga aaactaaaa actatactc  
20641 atthaatcct atatgctaat aatataaaaa ctgctthacc catctthtgc thttaatatta  
20701 aaacathttc thctthtgc thtagctatg agctgagtaa aaataccac atagaacac  
20761 gcgctggctg tgctthtgcct ggtcctthtgc gcatgattt actaggctta aaagataatg  
20821 aagaathtaa aactaaacca ggtthgctaa gaatthttht gcattatact cacgaaaaag  
20881 aagatthtga ctathttctth gaagcactgc aaaaaagtat aataaaatth aaatthttht  
20941 gatggcgag cggacggggc thgaaccgc gacctccgc gtgacggggc ggcattctaa  
21001 ccagctgaac taccgtgca ccaagaagt aataathttht tggthtgcac tataagactc

```

21061 gaacttatga catccacctt gtaagggtgg cgctctacca actgagctaa gcgaccttaa
21121 tttttggcga cccctagagg atttgaacct ctgtttccac acagagagag tgtttgtcctg
21181 ggccactaga cgaaagggtc taaacccgat aagtgggtgc ccgtgttggga ttcgaaccaa
21241 cggccccctc cttaaaaggg agatgctcta ccggctgagc taacgagaca gatggcgcag
21301 cggacggggc tcgaaccgc gacctccgcc gtgacagggc ggattctaa ccagctgaac
21361 taccgctgca cccaagaagt aataatttaa tgggtggtcac tataagactc gaactta

```

//

LOCUS IHOPMAOI\_2 7392 bp DNA linear 12-APR-2021

DEFINITION Campylobacter species strain strain.

ACCESSION

VERSION

KEYWORDS .

SOURCE Campylobacter species

ORGANISM Campylobacter species

Unclassified.

COMMENT Annotated using prokka 1.14.6 from  
<https://github.com/tseemann/prokka>.

FEATURES

Location/Qualifiers

source

1..7392

/organism="Campylobacter species"

/mol\_type="genomic DNA"

/strain="strain"

gene

309..503

/locus\_tag="IHOPMAOI\_00031"

CDS

309..503

/locus\_tag="IHOPMAOI\_00031"

/inference="ab initio prediction:Prodigal:002006"

/inference="similar to AA sequence:RefSeq:ARJ53354.1"

/codon\_start=1

/transl\_table=11

/product="conjugal transfer protein TraU"

/protein\_id="Prokka:IHOPMAOI\_00031"

/translation="MIATLIDAACMNITGGVDIAYMTEVDPLWQDDELTA LINPEALL  
FGNPILNLACMADSASAQGN"

gene

524..700

/locus\_tag="IHOPMAOI\_00032"

CDS

524..700

/locus\_tag="IHOPMAOI\_00032"

/inference="ab initio prediction:Prodigal:002006"

/inference="similar to AA sequence:RefSeq:ARJ53354.1"

/codon\_start=1

/transl\_table=11

/product="conjugal transfer protein TraU"

/protein\_id="Prokka:IHOPMAOI\_00032"

/translation="MPIWRKSSYRLQILAPVPHPMGMGIGQSGILWSYAKNYPVAGDN  
FTFMLFKKKECCAF"

gene

714..1373

/locus\_tag="IHOPMAOI\_00033"

CDS

714..1373

/locus\_tag="IHOPMAOI\_00033"

/inference="ab initio prediction:Prodigal:002006"

/inference="similar to AA sequence:RefSeq:ARJ53355.1"

/codon\_start=1

/transl\_table=11

```

/product="transcriptional regulator"
/protein_id="Prokka:IHOPMAOI_00033"
/translation="MYIRDFRKRLHMTQSEFAQALGKQTNISMYEKHRVKPTCELIV
KLIIRFNANPNFLFFGKEPHLNTDTFKNEISQELSQLISELSLYENEENIIVELENKA
LGKILSLVNPKEIWERLFFLFRINRKLHFVTSFICRVAKRLKQRDDEAKAYLISIINS
FNEGDFTELNEYIKLDLIALFDEKITEEEAKTIIEDCLVVFKHIENTAPIHKMVELGK
D"
gene 1394..1522
      /locus_tag="IHOPMAOI_00034"
CDS 1394..1522
      /locus_tag="IHOPMAOI_00034"
      /inference="ab initio prediction:Prodigal:002006"
      /codon_start=1
      /transl_table=11
      /product="hypothetical protein"
      /protein_id="Prokka:IHOPMAOI_00034"
      /translation="MKKQIIGSILLCSSLFAYKSTKDLKNDVLEKLIQNINDSLY"
gene 1916..2698
      /locus_tag="IHOPMAOI_00035"
CDS 1916..2698
      /locus_tag="IHOPMAOI_00035"
      /inference="ab initio prediction:Prodigal:002006"
      /inference="similar to AA sequence:RefSeq:SQE23558.1"
      /codon_start=1
      /transl_table=11
      /product="TraT complement resistance protein"
      /protein_id="Prokka:IHOPMAOI_00035"
      /translation="MKINKSILKMGLSSILAASLLTGCLTTTLQTNATMSQSIFLDPV
AKEKRVVFLNIKNTSGHEVNLEPKLRSALETKGYKIIDDPDKATYILSTNVLYCDKKQ
ENNVAGGAAAAGATGVAISGYNGGGAGGMVAAGAAGALVGGLLGKLTEDTIWQMQVDI
NIKQKADGKVL TSSGNVSGQASIRDQRASGFLNSFGGSVRSKVGQLNSNQINSTQQT
YEGKYIEKNSIIFAEAVKTGLKLPEATPILENKIATQIAGLF"
gene 2711..3142
      /locus_tag="IHOPMAOI_00036"
CDS 2711..3142
      /locus_tag="IHOPMAOI_00036"
      /inference="ab initio prediction:Prodigal:002006"
      /inference="similar to AA sequence:RefSeq:ABS43376.1"
      /codon_start=1
      /transl_table=11
      /product="putative thioredoxin"
      /protein_id="Prokka:IHOPMAOI_00036"
      /translation="MILKKIKILFLAIFLAFSPMTLEAKIYDNVYIAQKRALKEAKLM
VFFVLSNTCNYCHKLMSDALNNRDLMEYLDENFIVTISDLNADGLIPRDL LFNGVTPT
TYILTPTGKVIPTPIEGAVDSNMLFGLLKGLEDYKKGQLGF"
gene 3278..4150
      /locus_tag="IHOPMAOI_00037"
CDS 3278..4150
      /locus_tag="IHOPMAOI_00037"
      /inference="ab initio prediction:Prodigal:002006"
      /inference="similar to AA sequence:RefSeq:CKG86076.1"
      /note="Domain of uncharacterised function (DUF3825)"
      /codon_start=1
      /transl_table=11

```

```

/product="hypothetical protein"
/protein_id="Prokka:IHOPMAOI_00037"
/translation="MTESGFNLEKDENEPSLVYVKKATTRNKTNLNREQIQNKVEEKPL
LFQFAYFPNFLNTLQELSNIAQKEFWGSGNNILFSYLFKYFEFIHENKNYPDIITYNK
DKTKACFNTGLYSTGVFPIFAYFEKQENGGYIFRKFCNGDRVLDDLEIPKSLNDFDS
FKNELIFDSKLDLRINHLHLFERKERLPEIIKKLNDRFIGHIINGELKIIKDNYNHQK
MIIPAAYKQKVLYIPLKLQEESVDTIVVVEKEEVKNEQYYAVRTILNPHDNIYKTAR
VLSIVESEWVKNTI"
repeat_region 4191..4351
                /note="CRISPR with 3 repeat units"
                /rpt_family="CRISPR"
                /rpt_type=direct
                /rpt_unit_seq="atTTTatcatacaaacatttaacaagagg"
gene 4808..5416
CDS 4808..5416
    /locus_tag="IHOPMAOI_00038"
    /product="hypothetical protein"
    /protein_id="Prokka:IHOPMAOI_00038"
    /translation="MDKAVNIKLKIIFAVLVFLILTNIIGILFISKNEIFTKTLVGLIA
IAFILYYALAWIKTIKNIKKDSSKSGVKNLFIGILKLPYELVKILFKLPKIIIFMAILT
EFDYFLGYFSDKFKNKKQNNYDNFDDIDYIINNAKAIGGNAITKIGNTTFVGGDMVTK
IGNTTFIGGNMVTKIGNTTFVGGDMVTKIGNNTFVGGNLVLW"
gene complement(5444..5923)
CDS complement(5444..5923)
    /locus_tag="IHOPMAOI_00039"
    /product="hypothetical protein"
    /protein_id="Prokka:IHOPMAOI_00039"
    /translation="MQSYSPSAASTIHKGNVGTVDSSAVGFGNNYEADKKTMGNGHL
DFAGQNTAWQGNSQGTVQQEVQGVANATNQFNKPTEQRMGGGHFVDATVGEGLLN
RAGSGMIKWGESVGETAKMFGWGSIPSTPPPQNNSTTSTPPNYAPPAPKISPEFLK"
gene 6390..6722
CDS 6390..6722
    /locus_tag="IHOPMAOI_00040"
    /product="hypothetical protein"
    /protein_id="Prokka:IHOPMAOI_00040"
    /translation="MKKDKMQIAEHILQNCYWGNTTMTPSFIVEHINDKDFARTIFSA
IFQNSLTMFEDLKIIDNEEWIKEFIISQNQRLGYHKRFYYEERLDELIAHYGIKDAGK
RREVYPIV"
gene 6685..7356
CDS 6685..7356
    /locus_tag="IHOPMAOI_00041"

```

```
/inference="ab initio prediction:Prodigal:002006"  
/codon_start=1  
/transl_table=11  
/product="hypothetical protein"  
/protein_id="Prokka:IHOPMAOI_00041"  
/translation="MQEKEEKYIQLYKTQDKVLDLVAKEKLDLYLTGGTALQRFHYNQ  
FRFSDDLDFFLINNGIKNHTPKFENDFASMLQDNNIDFEIKVSNQYFTQLYIKENNLK  
IDLVNDYVFHEKNDYVKLENGLLIDSIQNIQIFVNKLETSISRDEPRDLFDIYTILRNSK  
IDIEKSFIDLDKKTNIIEPKDIINKLKNIKLEQIQYNKINTKSDFI IKDFLQNFHKSID  
ENFNS"
```

ORIGIN

```
1 gcttatttta taggattaaa agtgaatttt taaaaattga tgatagctat ctgcaattgg  
61 gtaaactttc aattcatgct aaagaattca ttacttaaaa agcatttggt tttgactttt  
121 ttcaattgaa tttttatatc taaaatatct tcaatataaa aaattattat atgtttatta  
181 tatatattta taaaaaaaaat ttataaatat atataataaa catatatttt tttctaaaaa  
241 atgatataat tatcaagaaa tttctaatta aagtttttta tattaaaaaat atcatcctag  
301 ttctaggcat gatagcaact ttaattgatg cagcatgtat gaatattaca ggcgggtgtgg  
361 atatagccta tatgacagaa gtagatcctt tgtggcaaga tgatgaatta acagctttaa  
421 tcaatcctga ggctttgcta tttggtaatc ccattttaaa tcttgcttgt atggcagata  
481 gtgcatcagc acagggcaat taggactttg tggagaatat cctatgccta tttggagaaa  
541 atcatcctat agattgcaaa ttttagcacc tgttcctcat cctatgggaa tgggaatagg  
601 acaaagtggc atattgtgga gttatgctaa gaattatcct gtagcaggag ataatttcac  
661 ctttatgctt ttttaagaaaa aagaatgctg tgcattttta taagtgaggt ttaatgtata  
721 taagagattt tagaaaaaga ttgcacatga cacaatcaga atttgcacaa gcattaggca  
781 ctaaacagac aaatatctca atgtatgaaa aacacagagt aaagccaacc tgcgagctta  
841 ttgtaaaatt aattataaga ttcaatgcta atccaaactt tcttttcttt ggcaaagaac  
901 ctcatattgaa tacagataca ttcaaaaatg aaatttcaca agaattgagt caattaatca  
961 gtgaattatc tctatatgaa aatgaagaaa atatcatagt ggaactagaa aataaagcct  
1021 tagggaagat tctttcgctt gtgccaacaa aagagatttg ggaaagattg tttttcttat  
1081 ttagaataaa cagaaaatta cttttgttta cttcatttat ttgtagagta gctaaaagac  
1141 tcaaacaag agatgatgaa gccaaagcat atctaatttc tattattaat agttttaatg  
1201 aaggtgattt caccgaactt aatgaatata tcaaattaga ttttaattgca ctatttgatg  
1261 aaaaaatcac cgaagaagaa gcaaaaacta ttatcgaaga ctgcttggtt gtatttaagc  
1321 atattgaaaa tacagctcct atccacaaaa tggtagaact tggaaaagat taataataag  
1381 aaaggttaaa aaaatgaaaa aacaaattat aggttctatt ttattatgct cttcgttatt  
1441 tgcataataa tctaccaaaag atttagataa aaacgatgta ttggaaaaat taattcaaaa  
1501 tataaatgat agtttatact aaataaagga ggaacaggac ttaaataatag aaaattaaac  
1561 actataacat atatttttat aaaggagaat aaaaacaaat aaggacagga atgtagttaga  
1621 attttggttg atagctttgt caatgataaa tataacatag aagcgaaagc tactgtatac  
1681 ttagaagtga ttttaataa aacagatttc tctagaactt atttagaatc taaaatttct  
1741 aaggaatttt caaacatca tgccaaagag caagaaaaaa attattttta aaaaatttca  
1801 atgctataga aaaaagcttg gatgagctaa cgggcgaaac ggaagaaagt cgtgctaaaa  
1861 tttaaaaagc aggttaaaga aatttttgaa aaaatattca ctaaaaagga aaacgatgaa  
1921 aataaataaa tcaattttta aatgggatt aagcagtatt ttggcagcaa gcttgcttac  
1981 gggttgtcta acaacaactt tacaactaa tgcaactatg agtcaaagca tctttttaga  
2041 tcctgtggca aaagaaaaaa gagttgtatt cttaaattat aaaaatacaa gcggacacga  
2101 agttaactta gaacctaac taagaagcgc attagaaacc aaggatata aaattataga  
2161 tgatcctgat aaagcaactt atattttaag tactaatggt ttatattgcg ataaaaaca  
2221 agaaaataat gttgcaggcg gtgctgcagc cgcagggtgct acaggcgtag caattagttg  
2281 atataatgga ggcgggtgcag gcggtatggt tgcagcaggt gcagcaggtg ctttagtagg  
2341 aggactttta ggaaaactta ccgaagacac tatttgcaa atgcaagttg acattaatat  
2401 caagcaaaaa gccgatggta aagttttaac ttctagcgga aatgtaagtg gacaagcaag  
2461 cattagagat caaagagcat caggattttt aaatagcttt ggcggaagtg ttcgtagcga  
2521 taaagtagga cagcttaatt caaaccaaat taatagtacg caacaaacct atgagggtaa
```



2581 atatataгаа аааааттсаа ttattttttgc агааgctgta аааасaggac тaaaaacttcc  
2641 tgaagcaacc cctatttttgг аааасaaaat cgcaactcaa attgcaggat tгttctaaaa  
2701 aggatatctt atgatactaa аааааатааа аattttattt ttagctatct ttttagcctt  
2761 tagccctatg acgctagagg ctaaaatcta tgataatgta tatattgctc аааасгagc  
2821 attaaaagaa gcaaaгttaa tggttttctt tгttctttca аacacttgca attattgcca  
2881 caaactcatg агtgatgсgt taaataatag агatttgatg gaatatcttg atgaaaattt  
2941 tatcgttact atctctgatt tgaatgcaga tggactaatt cctagagact tattatttaa  
3001 tggagtгact ccaacaactt atattttaac тсcaacagga аааgтаatag гсactcctat  
3061 tgaaggagcg gttgactcta atatgctttt tggattatta аааgгtttag ааgattataa  
3121 gaaaggacia ttaggttttt агсgtggaaa аааасатага ааааттаат тtagaagcct  
3181 atgaagatag caaaactaaa tttgaacatg ttactacagg асatatcagt caatatttga  
3241 ааааааатат gatttgaaaa ттаattgtag таaggcгttg асagaatcag gatttaatct  
3301 tгaaaaagat gagaacgaac cttctttagt ttatgtaaaa аааgctacca caagaaacia  
3361 аactttaaat cgtgagcaaa ttcaaaacia агttgaagag ааgсttttat tattccaatt  
3421 tgcctatttt ccaaattttc тaaatacact тсааgagctt тстаататг ctcaaaaaga  
3481 attttggggg агсggaaata atattttatt ctctatcta тttaaatatt ttgaatttat  
3541 тсatgaaaat аааасactat ctgatattat cacttataac аааgaciaaa caaaggcгtg  
3601 тttcaataca ggtttgtata гсacagggtg тttccaata тttgcatact ttgaaaagca  
3661 ggaaaatgga ggatatattt тtagaaaatt ttgctctaат ggggatagag тtttagatga  
3721 тttggaaata cccaaatctt tgaacgattt tgattcгttt ааааатгаас тсatctttga  
3781 tagcaagtta gattttagaa ттаaccattt асatctcttc gagagaaaag аacgattgcc  
3841 cгaaataata аааааactaa atgataggtt сataggacac attatcaatg gtgagttgaa  
3901 аatcatcaag gataattata atcatcaaaa gatgattatt cctgcagctt атагсaaaa  
3961 ggtagtttta тatattcctt тgaaacttca агаагаатса gttgacacia tagttgtagt  
4021 tгaaaaagag gaagtaaaaa atgagcagta ttacgctgta агаactatac таaatccгca  
4081 tgataatatc тacaaaactg caagagttct тtcgatagtt gaatctgaat gggttaaaaa  
4141 caccatttga ааатааааат attgataaaa taggctttta ааатаагtct attttatcat  
4201 асаасattt асаагaggc тaaaaccgaa ттааgсгgtt тtattaaaac cctcttattt  
4261 тatcatacaa асattttaaca агaggctaaa acttgctatt gatgattgct attcатgatt  
4321 гсattttatc atacaaacat ттаасааgag gttaaaacat тсattcaaaa атаctataat  
4381 тaaagtgtat taggtatgac tactctttcg attataagaa ggaggaataa тgagtaagat  
4441 cattgagttt тtagttcttg тcttagaatc ааттаасgag атаатсааgс тсгttgatta  
4501 тctcacttaa ааааасгaa атаattataa атааассagc attagcctaa гсttaagaca  
4561 atttaccaa аааасactta atcgaattat gggcattgtt аатссctacg cttgaaggac  
4621 татаатаgag аттаааатта сататтаact тgтаатсаас ttgaagttaa gttgtagtca  
4681 gataaaaaaa gaaatccatt ттааасссca тaaaaatagt cgtttaatag caaaaatact  
4741 тacaaaaaat ttattaaaat атаататаат тatgttatat ааатаагtta атаtgaaagg  
4801 аатасаатг gataaagcag тaaatataaa аттааааатс atttttgccg тattatttgt  
4861 attgatttta асааататг гсattttatt татааgcaag аатgaaatat тсacaaaaac  
4921 actgttaggc ттаатгсга ttgctttcat тttatattat гсtttagctt ggataaaaaac  
4981 татаааааас аттаагааг atagctctaa аагtgгagtt ааааатсttt тtataggtat  
5041 тttaaaatta сtttatgagt tagtgaaaat attatttaaa тtgссtaaaa тtatatttat  
5101 ggctatttta асagagtttg attatttttt gggctatttt тсagataaat ттааааасаа  
5161 аааасаааас аactatgata attttgatga тatagattat attataaaca atgcaaaagc  
5221 тataggcгga аатгсtatta ctaaaatagg таатасааса тttgtaggcg gtgatatggt  
5281 тaccaaaata ggтаaacta catttatagg сгgтаататг gttactaaaa taggтаaatac  
5341 аacatttgta ggсгgtgata tggttaccaa аатaggaaac аатасatttg tggggggaaa  
5401 тttagtttta тggтаattta тааgcaagc тааатtagct тgcttatttt аааааттсag  
5461 gagatatttt аггсгсagga ggagcataat ttggaggcgt агаагttgta гаattatttt  
5521 гсггaggcgг агtgctaggt аттссacttc ссcaaccaa cattttggca gtttctccta  
5581 сactttcacc ссattttatc аттссacttc ctgctctatt таатаатгag сtttctccta  
5641 сagttgcatc тacaaaatgc ссcccccca тtctttgttc агtaggctta ттаааттгat  
5701 тtgтсгсatt агсаасctgt сcttgaactt cttgttgсac тgttccttgt гаattgсctt  
5761 гtccccaaгс tgtattttgt cctгсгааат стаагtгtcc аттссссata gttttcttat

```

5821 cagcttcata attatttcca aatcctacag ccatgaatc tactgtgcca taattacctt
5881 tatggattgt agaagctgca gaaggactat aatagctttg catacctacg gaacctatag
5941 tattttgchg actattaata tctcctgcat taaagtattt attgcatatt aacttgtaat
6001 caatttaaag ttaagtgtag tcagataaaa aaagaaattc atttaaagcc ccataaata
6061 gtatttaata ctaatattac tcgtgaaatt tattaaaata tgatataatt atgttatatt
6121 aattgagaaa ggagctactt atgatgttaa ctgtaaataa tatagataaa gctgtacaaa
6181 gcgtagtaag tctttctcca aaaagcaata cttgaattca tcaagaaggt tttgtttctt
6241 cagaagaaac cgtagtggct ttaactaatc ctgtagatcg tagggttttt gataactgca
6301 aatattttta gaaagcattg caaaaataaa ttatccactt atttttcaaa aaataatttt
6361 agtaaaattg caaaaaagg aaaattctaa tgaaaaaaga taaaatgcaa atagcagaac
6421 acattttaca aaattgctat tggggaaata ctactatgac acctagtttt atagtagaac
6481 atattaacga taaagacttt gcaagaacaa tttttagtgc ttttttcaa aattcgctta
6541 caatgtttga agatttaaag attatcgata atgaagaatg gataaaagaa ttcattcattt
6601 ctcaaacca aagattaggc tatcacaata gattttatta tgaagaaagg cttgacgagc
6661 ttatcgaca ttatgggata aaagatgcag gaaaaagaag agaagtatat ccaattgtat
6721 aaaacacaag acaaagtctt tgatctagtt gcaaaaagaa aattagattt ttatcttaca
6781 ggtggaacag ctttgcaag atttctactat aatcaattta gattttctga tgatttggat
6841 tttttcttga ttaacaatgg aatataaaac catactcaa aagaatttaa tgattttgca
6901 agtatgttac aagataataa tatagatttt gaaataaaag tttccaatca atattttact
6961 caactttata tcaagaaaa taatctcaa atagatttag tcaatgatta tgtatttcac
7021 gaaaaaacg attatgtaa acttgaaaat ggtttgctta tagacagcat acaaaatattc
7081 tttgttaata agttagaac ttcaatttct agagatgaac caagagattt gtttgatatt
7141 tacacgattt taagaaacag taaaatagat attgaaaaaa gttttgatat tttagataaa
7201 aaaaccaata tcgaaccaa agatattatt aataaattaa aaaatattaa attagaacaa
7261 attcaatata ataaaattaa tacaagagt gattttatta taaaagattt tttacaaaat
7321 tttcacaagt ccattgatga aaattttaat tcttaaataa aagaaattcg cttaaaatcc
7381 tataaaatag gt

```

//

LOCUS IHOPMAOI\_3 1938 bp DNA linear 12-APR-2021

DEFINITION Campylobacter species strain strain.

ACCESSION

VERSION

KEYWORDS .

SOURCE Campylobacter species

ORGANISM Campylobacter species  
Unclassified.

COMMENT Annotated using prokka 1.14.6 from  
<https://github.com/tseemann/prokka>.

FEATURES Location/Qualifiers

source 1..1938

/organism="Campylobacter species"

/mol\_type="genomic DNA"

/strain="strain"

gene 150..512

/locus\_tag="IHOPMAOI\_00042"

CDS 150..512

/locus\_tag="IHOPMAOI\_00042"

/inference="ab initio prediction:Prodigal:002006"

/codon\_start=1

/transl\_table=11

/product="hypothetical protein"

/protein\_id="Prokka:IHOPMAOI\_00042"

/translation="MCKLNELPNNEEKYNKILGYFDKKLGDIDDFRHVKKYGSIEMWL  
YIYYDDTYKTPSNFQEKIEMDNIALKTKNMQMSLHKIVDMHISPYWNTRYVLEGNEG

```

gene          NMNFEFIEDELACGNLYQ"
              531..1262
              /locus_tag="IHOPMAOI_00043"
CDS           531..1262
              /locus_tag="IHOPMAOI_00043"
              /inference="ab initio prediction:Prodigal:002006"
              /inference="similar to AA sequence:RefSeq:AVS37480.1"
              /note="DUF2974 domain-containing protein"
              /codon_start=1
              /transl_table=11
              /product="hypothetical protein"
              /protein_id="Prokka:IHOPMAOI_00043"
              /translation="MTNKQLINKLRDMAELAQASYGYFDLVTHDKNDFFIKIKDEATE
SAFFNKHITQANVLDISYKKNYKAYQYDSSLKDKIKIGTLNGDFSPLQAKQFFSRDLL
KHCPNTNSGFSATLFGEKRKQINSKTKEKSYTSEYGYINYILAIRGTEMSSFKDLFVA
DASLAIGSIPKAQYDDMINFYETCIKDYPQIKEKDSLITGHSLLGGCLAQLFALSICD
DKSEANINEICNIESKPLKELQCYL"
gene          1250..1816
              /locus_tag="IHOPMAOI_00044"
CDS           1250..1816
              /locus_tag="IHOPMAOI_00044"
              /inference="ab initio prediction:Prodigal:002006"
              /codon_start=1
              /transl_table=11
              /product="hypothetical protein"
              /protein_id="Prokka:IHOPMAOI_00044"
              /translation="MLFVIICFLIVFTLSYFIWLLIYRKAFKSKKKISKFLVFIGGI
GLIVFYYPYSYYLEPSFYKFKEICKLDPEIYQANGSKLDEEYNNKVLRYFDTDLDNM
SKIKTLRISDDKKHFSYWFEEKWIGDRISDFVIWFKNENATKDNIKKVSVYVWWRDLR
PLPAGNEGAGFYLSGDRENCAYFKKEIK"

```

ORIGIN

```

1 taatttttaa gtgtatatat agaatcatct ttaaacttaa aaaaagtgtt tcaaagtttt
61 tagtccttct tggaagcata ggtttaatta tcttttatta tactccttat tcttattatt
121 tagagcctag ttattggcaa ttttaggaata tgtgtaagtt aatgaactt cctaataacg
181 aagagaaata taataagatt ctagggattt ttgataaaaa gttagggtgac atagatgatt
241 ttcgacatgt aaaaaaatat ggtagtatag aaatgtggct ttatatatat tacgatgata
301 cttacaaaac tccttcaaat tttcaagaaa agatagagat ggataatatt gcactaaaaa
361 caaaaaatat gcaaatgtct ttacacaaga ttgttgatat gcatataagt ccatattgga
421 atactagaag gtatgtgtta gaaggcaatg agggtaatat gaattttgag tttatagagg
481 atgagctcgc ttgtggcaat ctttatcaat aataatataa ggaataaata atgaccaata
541 aacaacttat taataaacta agggatatgg cggaaacttg acaggcaagt tatggttatt
601 ttgatttggt aacacatgac aagaatgatt ttttcattaa aattaaagat gaagctacag
661 aatctgcttt ctttaataag cacattactc aagctaattg cttagatatt agttataaaa
721 attataaggc atatcaatat gactcatctt taaagaaaga tattaaaatt ggcactctca
781 atggcgactt ctctccactc caagctaaac aattcttttc tcgctatgat ttattaaaac
841 attgccctaa taaaaattca ggtttttctg ctactttatt tggagaaaaa agaaaacaaa
901 ttaatagtaa aacaaaagaa aaaagctata ccagtgaata tggctatatac aattatattt
961 tagctattag aggaacagaa atgagttctt ttaaagattt gtttgtagct gatgcttctt
1021 tagccatagg ctctatacct aaagccaat atgatgatat gataaacttt tatgaaactt
1081 gtattaaaga ttatccacaa atcaaaagaa aagactctct taccattaca ggacactctc
1141 ttggaggctg tcttgcacaa ctctttgctt taagtatctg tgatgataaa agcgaagcaa
1201 atatcaatga aatttgtaat atagaatcta aaccctaaa ggaattacaa tgctatttgg
1261 aatcatatgt tttctcctta ttgtctttac tctctcatat tttatatggt ggcttatcta
1321 tagaaaagca tttaaatcaa agaaaaaaat ctctaagttt ctagtattta ttggtgggat

```

```
1381 aggattgata gtatTTTTtatt atactcctta ttcttattat ttagagccaa gcttttataa
1441 atttaaagaa atatgtaagc tagaccaga gatttacaa gccaatggta gtaaattaga
1501 tgaggaatat tataataaag tgctaaggta ttttgatagc gatttggata atatgtcaaa
1561 gataaaaaca ttaagaataa gcgacgataa aaagcacttt tcatattggt ttgaaaaatg
1621 gattggagat agaatctctt ttgattttgt catttggttt aaaaatgaaa acgctacaaa
1681 agacaatatc aagaaagtta gcgtttatgt ttgggtggcgt gatttacgac cattgccagc
1741 aggtaatgag ggggcgggat tctatctttc aggagatagg gaaaattgtg cttattttaa
1801 aaaggaaata aaatgaacaa taaagaacag attaaaaagc tcaaagataa tgccgaatta
1861 gcaatggcaa gttatgggta ttttcattta gcagataaat cctataatca taatgataaa
1921 tatgaaaagc gattaaag
```

//

LOCUS IHOPMAOI\_4 830 bp DNA linear 12-APR-2021

DEFINITION Campylobacter species strain strain.

ACCESSION

VERSION

KEYWORDS .

SOURCE Campylobacter species

ORGANISM Campylobacter species

Unclassified.

COMMENT Annotated using prokka 1.14.6 from  
<https://github.com/tseemann/prokka>.

FEATURES Location/Qualifiers

source 1..830

/organism="Campylobacter species"

/mol\_type="genomic DNA"

/strain="strain"

gene complement(130..702)

/locus\_tag="IHOPMAOI\_00045"

CDS complement(130..702)

/locus\_tag="IHOPMAOI\_00045"

/inference="ab initio prediction:Prodigal:002006"

/codon\_start=1

/transl\_table=11

/product="hypothetical protein"

/protein\_id="Prokka:IHOPMAOI\_00045"

/translation="MTYILLLVIIISTILSYLILKFIYKIIFKSTKSVSKFLVFLGSIG

LIIFYYPYSYYLEPSFYKFKICKLDPEIYQANGGKLDDEEYYNKVLRYFDTDLDNMS

KSYKKELGVTNDKKYSRYWFETWIDGRTEISFEIWFKSNIAIKDNIDFSIKPFFYANW

DKMRPLPAGNEGTFGLGVPISCIYFKKD"

ORIGIN

```
1 ctttaatcgc ttttcatatt tatcattatg attataggat ttatctgcta aatgaaaata
61 cccataactt gccattgcta attcggcatt atctttgagc tttttaatct gttctttatt
121 gttcattggt tagtcctttt tgaatatata gcaacttatt gggacacttc ctaaaaaaaaa
181 tcctgtcccc tcattacctg ctgggagggg tctcatttta tcccaattag cataaaaaaaaa
241 aggttttata ctaaagtcaa tattgtcttt tattgcaata ttacttttaa accatatttc
301 aaagcttatt tcggttcttc catctatcca tgtttcaaac caatatctac tatatttttt
361 atcattagtt acccctagct cttttttata tgactttgac atattatcca aatccgtatc
421 aaaatacctt agcactttat tataatactc ctcatcfaat ttaccacat tagcttggtta
481 aatctctggg tctagcttac atatttcttt aaacttataa aagcttggct ctaaataata
541 agaataagga gtataataaa agataattaa gcctatactt ccaagaaaga ctaaaaactt
601 tgaaacgctt tttgtagatt taaagatgat tttataaata aattttaata taagataaga
661 aagaatagta gaaattataa caagaagtaa tatatatgtc ataggttatc tccttagact
721 ctctatttta ttaaaattaa gatgtaattt tgtggtttag tgttagcagt ataacttttt
781 ctttatcatt aaaataatag agcttgtttt ttcatatatt tttatccttt
```

//

>>BfR-CA-15849\_min\_cov\_30 putative plasmid location

LOCUS BGIOAKBI\_1 3741 bp DNA linear 12-APR-2021  
DEFINITION Campylobacter species strain strain.  
ACCESSION  
VERSION  
KEYWORDS .  
SOURCE Campylobacter species  
ORGANISM Campylobacter species  
Unclassified.  
COMMENT Annotated using prokka 1.14.6 from  
<https://github.com/tseemann/prokka>.  
FEATURES Location/Qualifiers  
source 1..3741  
/organism="Campylobacter species"  
/mol\_type="genomic DNA"  
/strain="strain"  
gene complement(66..242)  
/locus\_tag="BGIOAKBI\_00001"  
CDS complement(66..242)  
/locus\_tag="BGIOAKBI\_00001"  
/inference="ab initio prediction:Prodigal:002006"  
/inference="similar to AA sequence:RefSeq:CKG86410.1"  
/codon\_start=1  
/transl\_table=11  
/product="hypothetical protein"  
/protein\_id="Prokka:BGIOAKBI\_00001"  
/translation="MKYYATIYIDPLDFDFEDATHAFLGLTKDKSPDELDKIDKELRQE  
YLNKKEFKLIKSIK"  
gene complement(239..697)  
/locus\_tag="BGIOAKBI\_00002"  
CDS complement(239..697)  
/locus\_tag="BGIOAKBI\_00002"  
/inference="ab initio prediction:Prodigal:002006"  
/inference="similar to AA sequence:RefSeq:CKG86435.1"  
/codon\_start=1  
/transl\_table=11  
/product="hypothetical protein"  
/protein\_id="Prokka:BGIOAKBI\_00002"  
/translation="MQIPIYSKLEKAKLESKGIDNISSGQIAWFVCSVGIVYLLSIFLY  
LHGVNKEGISFNRIFIIFYINHFFCFIFMWFILLNLLYKENTISLILAILTTIVYFY  
NPYFAYILIFIICIIMRIIKKQRWLYVYFIGLIYIYATYSIFNLRGGFYK"  
gene complement(744..917)  
/locus\_tag="BGIOAKBI\_00003"  
CDS complement(744..917)  
/locus\_tag="BGIOAKBI\_00003"  
/inference="ab initio prediction:Prodigal:002006"  
/inference="similar to AA sequence:RefSeq:CKG86410.1"  
/codon\_start=1  
/transl\_table=11  
/product="hypothetical protein"  
/protein\_id="Prokka:BGIOAKBI\_00003"

```

/translation="MKYCATIYIDPLVECFDLCENKNFINAEDFTHAFLGLTKGKSLD
ELDKIDKELRQKF"
gene      complement(914..1339)
CDS       /locus_tag="BGIOAKBI_00004"
          complement(914..1339)
          /locus_tag="BGIOAKBI_00004"
          /inference="ab initio prediction:Prodigal:002006"
          /inference="similar to AA sequence:RefSeq:CKG86435.1"
          /codon_start=1
          /transl_table=11
          /product="hypothetical protein"
          /protein_id="Prokka:BGIOAKBI_00004"
          /translation="MQIPIYSKLGKLESGIDNITSGQIAWFVCSVGIFIIIPMIYFY
ISNNYDQFTILFIMIFIFILNMFYTKNFFALLLLVILIFIYMKYHEFIYNFKILFFIF
APIILIFLAWRILITFLCGYIFLVAMVYIFELLGGFYK"
gene      complement(1609..2076)
CDS       /locus_tag="BGIOAKBI_00005"
          complement(1609..2076)
          /locus_tag="BGIOAKBI_00005"
          /inference="ab initio prediction:Prodigal:002006"
          /codon_start=1
          /transl_table=11
          /product="hypothetical protein"
          /protein_id="Prokka:BGIOAKBI_00005"
          /translation="MQIPIYSKLGKLESGIDNISSGQIAWFVCSLILALVTYIILT
FHYIYISYGKYDKNLFLLIFDRNAMELFIIIYSCIMFNLLYIYNAIPLVLSAVFIFLA
FYFSSLSLFIIVGCCGIGVFFLISIFKRKFMFSVLLFALGYTCTLFFFYGLATY"
gene      complement(2286..2435)
CDS       /locus_tag="BGIOAKBI_00006"
          complement(2286..2435)
          /locus_tag="BGIOAKBI_00006"
          /inference="ab initio prediction:Prodigal:002006"
          /inference="similar to AA sequence:RefSeq:AAW35443.1"
          /note="conserved domain protein"
          /codon_start=1
          /transl_table=11
          /product="hypothetical protein"
          /protein_id="Prokka:BGIOAKBI_00006"
          /translation="MKEKINKLRDYAELAWASYFYFDLKGYILQENETIVTLSELVSL
SYNGN"
gene      complement(2445..2750)
CDS       /locus_tag="BGIOAKBI_00007"
          complement(2445..2750)
          /locus_tag="BGIOAKBI_00007"
          /inference="ab initio prediction:Prodigal:002006"
          /codon_start=1
          /transl_table=11
          /product="hypothetical protein"
          /protein_id="Prokka:BGIOAKBI_00007"
          /translation="MGVFRKFYIVWVFCISGFAISPAVGHNPVRVYEFFVMLGWIIIF
PLILLMLYRFFSLCEIKFLYIALLLLLLYPIALILYMFYHNSFYVTLYIFLSLFK"
gene      complement(2909..3421)
CDS       /locus_tag="BGIOAKBI_00008"
          complement(2909..3421)

```

/locus\_tag="BGIOAKBI\_00008"  
/inference="ab initio prediction:Prodigal:002006"  
/codon\_start=1  
/transl\_table=11  
/product="hypothetical protein"  
/protein\_id="Prokka:BGIOAKBI\_00008"  
/translation="MKILKSLYIIWMIFWGFAGAILGYMGYDATFTKMFFFLVILYLF  
PLLPLYLHYLIFEKTKNKNIFISICYLLLFVITAYYFTLIYSCGTNFLTFFIMITLYM  
IICSAILWKFKINLRLYFYIILCIFTYLYIVLHIFIACYEIEWTDILLDKDVRIYIY  
KEIINLLTEQ"

ORIGIN

```
1 tttagaataa ataggaatth gcaaatttac tcctaataa gataaattgt tttattataa
61 ccaatctact taatactttt aattaattta aattctttgt ttttaagata ttcttgtcct
121 aattctttat ctatthttatc taactcatca ggacttttat ctttggtaag tcctaaaaag
181 gcgtgggtag catcttcaaa atcaaatagt ggatcaatat aaattgttgc ataatacttc
241 atttataaaa tcctcctcct aagttaaata tactataggt ggcataaata taaattaaac
301 caataaaata tacataaagc catctttgtt tctttattat acgcataatg atgcaaatga
361 taaatatcaa aatataagca aaatatggat tataaaaaata gacaatagtt gttaatatg
421 ctaatatata tgaaatagta ttttctttat agagtaaatt taacaataaa ataaaccaca
481 taaatataaa acaaaagaaa tgatttatat aaaatgcaat aatatctta ttaaaccgaaa
541 ttccctcttt attaacgcca tgcaaatata aaaaaataga aagcaaatat actatcccta
601 cactacacac aaaccaagca atttgtccac ttgatataat gtctattcct ttactttcta
661 gttttgcttt gagtttagaa taaataggaa tttgcaaatt tgctccta atagataaat
721 tgttttatta taaactaatt tgcttaaaat ttttgtctta attctttatc tattttatct
781 aactcatcaa gacttttgcc tttggtaagt ctaaaaaagg cgtgggtaaa atcttccgca
841 ttaataaaat ttttattttc gcaatctaaa aaacattcta ccaatggatc aatataaatt
901 gttgcacaat acttcattta taaaatcctc ctaataactc aatatatat accatagcca
961 ctaaaaaaat atatccgcat aaaaaagtta ttagaattct ccaagccctt aaaaagataa
1021 gaattatagg tgcaaaaata aaaaataaaa ttttaaaatt atagataaac tcatgatatt
1081 tcatatataa aaatattaat attacaagta ataataatgc aaaaaaattt ttagtataaa
1141 acatatttaa tataaaaaata aatatcataa taaataaaat agtgaattga tcataattgt
1201 tgctgatata aaaatataat ataggaatga taaaaatacc tacactacac acaaccaag
1261 caatttgctc gcttggtata ttgtctattc ctttactttc tagttttgct ttgagtttag
1321 aataaatagg aatttgcaaa tttgctccta atatagataa attgttttat tataaactaa
1381 tttgcttaaa attttttatt aatttgaatt tttgttttta agatattctc gtcttaattc
1441 ttcacttatt ttatctaact catcaggact tttgcctttg gtaagtccta aaaaggcgtg
1501 ggtaaaatct tctatttgcc aataacactg atttttaaaa tccaaaaaaa cattctacca
1561 atggatcaat ataaattggt gcataatatt tcatttataa aatcctttct aatagtttgc
1621 cagtccataa aaaaagaaca atgtgcaagt ataaccaag gcaaatagta aaacactaaa
1681 cataaacttt ctttaaaaaa tggatattaa gaaaaaact cctataccac aacaaccaac
1741 aataaacaag cttaaactag aaaaataaaa tgctaaaaat ataaatactg cagataaaac
1801 caaaggaatg gcattgtaaa tatataatag attaaacatt atacaagaat atataataat
1861 aaataattcc attgcatttc tatcaaatat taataaaaaa aaattcttat catatttacc
1921 ataactaatg taaatgtagt gaaaagttag aataatataa gtcaccaaag caagaatcaa
1981 gctacataca aaccaagcaa tttgccact tgatataatt tctattcctt tactttctag
2041 ctttgctttg agtttagaat aaataggaat ttgcaaattt actcctaata taacaagtta
2101 ttctattata agacaattta tttaaaaaatt tgattgtttc agtaagaaaa aatttcttga
2161 aatcatcatt aaattcacia ggctctttag cttcatttat tttatctact tattctaaaa
2221 gaggaaaaaa ttggataatg tcattaaaag atagggctat gtcttgaacc gagtcaataa
2281 aattatcagt ttccgttata acttaaaactt acaagctcac ttaaagtaac gatagtttca
2341 ttttcttgta atatataacc ttttaaatca aaataaaaaa aactagccca tgcaagctct
2401 gcataatctc ttagcttatt gattttttct ttcaaaatta tcctttattt aaataatgat
2461 aaaaaaatat ataagtgaac ataaaaacta ttatgataat aaaacatgta atacaatctc
2521 aaagctatag gataataaag taacaatagc aatgctatgt acaaaaactt tatttcaaaa
```

```

2581 agagaaaaaa agcgataaag cattaataga attaaagga aaataatcca acctagcatt
2641 acaaaaaaatt catacactct atttggatta tgccctacag caggagaaat agcaaatcca
2701 cttatacaaa atactacca aacaatataa aacttacgaa atacacccat ttattttcct
2761 ttttaatat tttagtaaat tttctacttt tttaaaaatt aaaataaaaa taactagccc
2821 aagctagttc tacataatct cttaaattgt tgatttgggt tttcattaat ttattcccct
2881 ataaaaataa gatttattat aaaacaaatt attgctccgt aagcaaatta attatttctt
2941 tgtaaatata tatccttaca tctttatcta gcagtatatc tgtccattct atttcataac
3001 atgctataaa aatatgtaaa actatataga gataagtaaa aatacataaa attatgtaaa
3061 aatataatct taaatttatt ttaaatttcc ataagattat agcactacaa ataatcatat
3121 ataaagtaat cattataaaa aatgttaaaa aatttgttcc acatgaatat attaaagtaa
3181 aataataagc ggtaataaca aataatagta gataataaca aatagaaatg aatatatfff
3241 tgttctttgt tttctcaaaa attaaataat gcaataaagg caacaatgga aaaagatata
3301 atataacaag aaaaaagaac attttagtaa aagttgcatc atatcccata taataaccta
3361 aaatagcccc aaatcccaa aatatcatcc aaataatata taaacttttt aatattttca
3421 cactacttcc ttttttgttg aaatttaaat tattattaaa aaattaaana aaccaatcta
3481 tacaagtitta gcgtaatttt tgagattggt aatttgagct ttattactca ttttttaatt
3541 ctatataaaa aataaaaaga tacaaaaaaa tgtataaaaa aatacaaaat aataaagaaa
3601 aataataaga aagttctttt ctaaatttaa tagatattat taaaaataat attgtataaa
3661 tacctaatat tattacataa ataaaaaatc ctcccgat aaagcaaaat aaagcaaaat
3721 aaagcaaaat aaagaaaaat a

```

//

LOCUS BGIOAKBI\_2 3223 bp DNA linear 12-APR-2021

DEFINITION Campylobacter species strain strain.

ACCESSION

VERSION

KEYWORDS .

SOURCE Campylobacter species

ORGANISM Campylobacter species  
Unclassified.

COMMENT Annotated using prokka 1.14.6 from  
<https://github.com/tseemann/prokka>.

FEATURES

```

Location/Qualifiers
source 1..3223
        /organism="Campylobacter species"
        /mol_type="genomic DNA"
        /strain="strain"
gene 432..764
        /locus_tag="BGIOAKBI_00009"
CDS 432..764
        /locus_tag="BGIOAKBI_00009"
        /inference="ab initio prediction:Prodigal:002006"
        /codon_start=1
        /transl_table=11
        /product="hypothetical protein"
        /protein_id="Prokka:BGIOAKBI_00009"
        /translation="MNTLKKIYIIWGMFWTIGLGIFVPTAHGFDSMDFVDFFILALQF
        IAIIWLPPLLIFNIVYFVIKKERYIINTLWILLYPIALILYYMFYHNSFYVTLYI
        FYHYLNKG"
gene 767..1213
        /locus_tag="BGIOAKBI_00010"
CDS 767..1213
        /locus_tag="BGIOAKBI_00010"
        /inference="ab initio prediction:Prodigal:002006"
        /inference="similar to AA sequence:RefSeq:AAW35443.1"

```



```

/note="conserved domain protein"
/codon_start=1
/transl_table=11
/product="hypothetical protein"
/protein_id="Prokka:BGIOAKBI_00010"
/translation="MKEKIDKLRDYAELAQASYFYFDLKGYLQENETIVILNELVSL
SYNGKIAGKKEKVGQEYSFIGKGELNGEFGELQARNFSQRYEIKFHQSNTLSGFSATL
FYDKQKDEFVVGFRGTEGFWNMDTMQDITLSLNGNLQSSPLLEFLE"
gene 1666..2379
/locus_tag="BGIOAKBI_00011"
CDS 1666..2379
/locus_tag="BGIOAKBI_00011"
/inference="ab initio prediction:Prodigal:002006"
/inference="similar to AA sequence:RefSeq:APA47419.1"
/codon_start=1
/transl_table=11
/product="lysozyme"
/protein_id="Prokka:BGIOAKBI_00011"
/translation="MQNLKLQIAQGLDKILEDEDRKQELYVCKFVVVNGASENKIKAK
NKDVNIDNDTKNINTTKSNNISSENNAQEKITHLSNDGQNLKLNIEKRLKPYNDQN
GKEITSYVKGATIGYGHLLIGQNEWDLYKNGITLQEADKLFKSDLLPFENAVKNSINSS
LAQNEFDALVILCFNIGIDNFKNSSVAKIINGEKTGYKTLKEAWMAWNKSQNKVMQRL
INRRNAEYKLYTQGGYEKW"
gene 2373..2732
/locus_tag="BGIOAKBI_00012"
CDS 2373..2732
/locus_tag="BGIOAKBI_00012"
/inference="ab initio prediction:Prodigal:002006"
/inference="similar to AA sequence:RefSeq:CKG86986.1"
/codon_start=1
/transl_table=11
/product="hypothetical protein"
/protein_id="Prokka:BGIOAKBI_00012"
/translation="MVIFKNILLFLFFSTYLLAQEDFTPLEQCTYENEKFWIKILNLC
PEGNITCDKIVYGVNKNNGKYIVLNGKSISDVNMNFKGYVFKNGIYEYNIFFNFLYI
SKNKQIIQEYRLKCEK"
gene 2999..3100
/locus_tag="BGIOAKBI_00013"
CDS 2999..3100
/locus_tag="BGIOAKBI_00013"
/inference="ab initio prediction:Prodigal:002006"
/inference="similar to AA sequence:RefSeq:AAW35464.1"
/note="conserved hypothetical protein"
/codon_start=1
/transl_table=11
/product="hypothetical protein"
/protein_id="Prokka:BGIOAKBI_00013"
/translation="MFISSKTELIQTIKNLTINNKEVKQIDFIYPNF"

```

ORIGIN

```

1 atattatttg gatgatattt tggggatttg gggctatttt aggttattat atgggatatg
61 atgcaacttt tactaaaatg ttcttttttc ttgttatatt atatcttttt ccattgtttgc
121 cttattttta ttatttgatt tataaaaaag caagaaatac aaaaaatata tttattgcta
181 tttattgcta tttattgtta tttgttgcta ctattgatta atagaaataa tagtaatttt
241 gagctgtact taattattat tgtgatacat attataatat ttgcaataat ttatttaatt

```

```

301 aaaagaaata aaaatgaaaa ctcaaatcaa taatttaaaa gattatgcag aacttgcag
361 ggctagttat gtttatttta attttataaa aagtagaaga attttactaa aaatattaaa
421 aaggaaaata aatgaataca ttaaagaaaa tttatatcat ttgggggatg ttttggacta
481 ttggacttgg aatTTTTgtg cctacagcac atggatttga tagtatggat tttgtggatt
541 ttttcatact tgctttacaa tttatagcta taatttggtt gcctccatta ctcattttta
601 atattgtata ttttTgtata aaaaaagaaa gaaaatatat tataaataca ttatggatat
661 tattgtatta tcctatagct ttgatattgt attacatggt ttattatcat aatagttttt
721 atgttacatt atatatTTTT tatcattatt taaataaagg ataattttga aagaaaaaat
781 cgataagcta agagattatg ccgagcttgc acaagctagt tttttttatt ttgattttaa
841 gggttatata ttacaagaaa atgaaactat cgttatttta aatgagcttg taagtTtaag
901 ttataacgga aaaatagctg gaaaaaaaga aaaggtcggg caagaatata gttttattgg
961 caaaggtgaa ttaaTggag aatttggaga attacaagct agaaatttct ctcaaagata
1021 tgagattaaa tttcatcaat ccaacacttt aagtggTTTT tctgctactt tattttatga
1081 taaacaaaaa gatgaattcg tggTgggatt tagaggaact gagggtTTTT ggaatatgga
1141 tacgatgcaa gacataactc tatctcttaa tggcaatctc caatcttctc ctcttttaga
1201 attttttaga taagtagata aaatcatcaa aaatgaaaat aaaagtatca tatttTtagg
1261 gcattcattg ggtgagattt gggggatgca atgaaaatat taaaaact ttatatTtgc
1321 tggattatat tttttatctt tgcttggata atatcacctt taattgggca taatccagat
1381 agattTtaagg aatttctcat agtgattgga tggataattt tgcctccaat agtgaacaat
1441 ctatggttat ttttaataac aagaattaaa aaatatttga taaggtTTTT tctattattg
1501 ttatattgtc cattggcaat tttattatat cttatatttg attaaaagga aaaaatatga
1561 agctatttta cacagctaca tgagtatgat aaaatcatca aaaattcttt agaagataag
1621 aaagaattaa acgaatatca ttttaactttt ttaactcttg caaaaatgca aaatttaaaa
1681 cttcaaactg cacaaggact agataaaatc ttagaagatg aagatagaaa acaagagctt
1741 tatgtttgta aatttTgtgt ggtaaTggg gctagcgaag acaaaaataa agcaaaaaat
1801 aaagatgtaa atatatagata tgacacaaag aatataaaca ctacaaaaag caataatata
1861 agttctagtg aaaacaatgc tcaagaaaaa atcactcatc taagcaatga tggTcaaaat
1921 ctttTaaaaa atatatagaa gctaagactc aaaccttata atgatcaaaa tggaaaagaa
1981 attacttcat atgtTaaagg tgcaactatc ggatatggac atcttatagg gcaaaatgaa
2041 tgggatttTgt ataaaaatgg tattacttta caagaagcgg ataaattgtt taaaagcgat
2101 ttgttacctt ttgaaaatgc tgtaaaaaat tcaataaact cttccttagc acagaacgaa
2161 tttgatgcct tggttatatt atgtttTaat atagggattg ataattttTaa aaattcttct
2221 gttgctaaaa tcatcaatgg agagaaaacg ggttacaaaa cattaaagga agcttggatg
2281 gcgtggaaca aaagtcaaaa taaagtaatg cagaggctaa ttaataggag aaatgctgaa
2341 tataagcttt acactcaagg aggttatgaa aaatggtaat tttTaaaaat atattattgt
2401 ttttattttt tagtacttat ttgttagcgc aagaggattt tactccacta gagcaatgta
2461 cctatgaaaa tgaaaagttt tggataaaaa tttTaaatct atgtccagag ggtaatataa
2521 cttgtgataa aattgtatat gtaggtgtca ataaaaataa tggaaaatat attgtcctaa
2581 atggtaagtc tattagtgat gtaaatatga atttTaaagg atatgttttt aaaaatggta
2641 tttatgaata caatattttt aataattttt tatatatttc taaaaacaag cagattatac
2701 aagaatcTcg tctgaaatta tgtgaaaaat agacacagca aaggcaacaa gcaacaacaa
2761 atacctagaa tatgTaaaaa gtTaaaaaga tgcaataaga attacaagaa gttttTaaag
2821 ttataaaaaa cctaattaat gaaatcttag ctctTaaatt ttataacaaa tacaagatt
2881 tagaagtaga gattgatgat aagggttaata ttataagatg gataggagag attaataaag
2941 acaaaaaata ttagcaaaata aaaaatgata taataatgct ttatataagg aatcttttat
3001 gtttataagt tctaaaacag agtttaattca aactattTaa aattTaaaca tcaacaataa
3061 agaagttTaa cagattgatt ttatttatcc taattttTaa agaatgatga aaatctTaat
3121 acttctttta ctaatctTaa tgctttTaaa ttcgctttag aagaaaagaa tttttatctt
3181 aattttatag actTaaacag caaagaaagt cttttagtt ttt

```

//

LOCUS BGIOAKBI\_3 929 bp DNA linear 12-APR-2021  
DEFINITION Campylobacter species strain strain.  
ACCESSION  
VERSION

KEYWORDS .

SOURCE Campylobacter species

ORGANISM Campylobacter species  
Unclassified.

COMMENT Annotated using prokka 1.14.6 from  
<https://github.com/tseemann/prokka>.

FEATURES Location/Qualifiers

source 1..929  
/organism="Campylobacter species"  
/mol\_type="genomic DNA"  
/strain="strain"

gene complement(73..378)  
/locus\_tag="BGIOAKBI\_00014"

CDS complement(73..378)  
/locus\_tag="BGIOAKBI\_00014"  
/inference="ab initio prediction:Prodigal:002006"  
/inference="similar to AA sequence:RefSeq:AVS37480.1"  
/note="DUF2974 domain-containing protein"  
/codon\_start=1  
/transl\_table=11  
/product="hypothetical protein"  
/protein\_id="Prokka:BGIOAKBI\_00014"  
/translation="MTNKQLINKLRDMAELAQASYGYFDLVTHDKNDFFIKIKDEATE  
SAFFNKHITQANVLDISYKNYKAYQYDSSLKDKIDITLNGDFSPLKLNNSFLAMIY"

gene complement(397..759)  
/locus\_tag="BGIOAKBI\_00015"

CDS complement(397..759)  
/locus\_tag="BGIOAKBI\_00015"  
/inference="ab initio prediction:Prodigal:002006"  
/codon\_start=1  
/transl\_table=11  
/product="hypothetical protein"  
/protein\_id="Prokka:BGIOAKBI\_00015"  
/translation="MCKLNELPNNEEKYNKILGYFDKKGIDDFRHVKKYGSIEMWL  
YIYYDDTYKTPSNFQEKIEMDNIALKTKNMQMSLHKIVDMHISPYWNRTRYVLEGNEG  
NMNFEFIEDELACGNLYQ"

ORIGIN

```

1 tttgagctaa ataccacca gagaatgtcc tacaatatg atacttttat tttcattttt
61 taggacaatg ttttaataaa tcatagcgag aaaagaattg ttttagcttga gtggggagaa
121 gtcgccattg agagtgtcaa ttttaatatc tttcttttaa gatgagtcac attgatatgc
181 cttataattt ttataactaa tatctaagac attagcttga gtaatgtgct tattaagaa
241 agcagattct gtagcttcat ctttaatttt aatgaaaaaa tcattcttgt catgtgttac
301 caaatcaaaa taaccataac ttgcctgtgc aagttccgcc atatccctta gtttattaat
361 aagttgttta ttggtcatta tttattcctt atattattat tgataaagat taccacaagc
421 aagctcatcc tctataaact caaaattcat attaccctca ttgccttcta acacatacct
481 tctagtattc caatatggac ttatatgcat atcaacaatc ttgtgtaaag acatttgcac
541 attttttggt tttagtgcaa tattatccat ctctatcttt tcttgaaaat ttgaaggagt
601 tttgtaagta tcatcgtaat atatataaag ccacatttct atactacatc atttttttac
661 atgtcgaaaa tcatctatgt cacctaactt tttatcaaaa taccctagaa tcttattata
721 tttctcttcg ttattaggaa gttcatttaa cttacacata ttcctaaatt gccataaact
781 tggctctaaa taataagaat atggagtata ataaaagata attaaacctt tgcttccaag
841 aaagactaaa aactttgaaa cgctttttgt agattttaaag atgattttat aaataaattt
901 taatataaga taagaaagaa tagtagaaa

```

//

>>BfR-CA-15851\_min\_cov\_30 putative plasmid location

LOCUS FHGGBLIP\_1 13234 bp DNA linear 12-APR-2021  
DEFINITION Campylobacter species strain strain.  
ACCESSION  
VERSION  
KEYWORDS .  
SOURCE Campylobacter species  
ORGANISM Campylobacter species  
Unclassified.  
COMMENT Annotated using prokka 1.14.6 from  
<https://github.com/tseemann/prokka>.  
FEATURES Location/Qualifiers  
source 1..13234  
/organism="Campylobacter species"  
/mol\_type="genomic DNA"  
/strain="strain"  
gene complement(1570..2478)  
/locus\_tag="FHGGBLIP\_00001"  
CDS complement(1570..2478)  
/locus\_tag="FHGGBLIP\_00001"  
/inference="ab initio prediction:Prodigal:002006"  
/inference="similar to AA sequence:RefSeq:AJK71146.1"  
/codon\_start=1  
/transl\_table=11  
/product="type VI secretion protein"  
/protein\_id="Prokka:FHGGBLIP\_00001"  
/translation="MNDLASYSFFKLIKLEKDYGRKNIFLRTNKS LKHPNKDIEKII  
FSEHEQSVVLFINFMGLHGVSSQLPSFMLDKLSRNEDAEQGWTLFFDFFNHYLLWIF  
FDVVS LKNYPRSFNENFKDSISQILFNILGIKEHDI AKKYL PFAPLLSLRRPKTHIE  
RVLQVNFKLKDKLSIIENLPHQILISDSQKNKLG IKNHTLGNF ILGDKFISYQNKIA  
IYIKDISYQEAVK FMPNGTKHDDLKNSIMFLTNNEFCVDLYLKINYSSEMKFVLGDEN  
TAKLGWAKILGNAQK KYTIVYMKLCE"  
gene complement(2475..4196)  
/locus\_tag="FHGGBLIP\_00002"  
CDS complement(2475..4196)  
/locus\_tag="FHGGBLIP\_00002"  
/inference="ab initio prediction:Prodigal:002006"  
/inference="similar to AA sequence:RefSeq:AJK71145.1"  
/codon\_start=1  
/transl\_table=11  
/product="type VI secretion protein"  
/protein\_id="Prokka:FHGGBLIP\_00002"  
/translation="MKDNIFYQKELEYLYEKREHF IKNYPKLT PFLAYDSKDPDIER  
IIENLAILSSKIHQELDENIPHIAESLINIISP NYTNPLPSLCMQEFKFEQNSKENNL  
IIPKGT LIKSKPIDKCVCFKTVYDVLYPISINEVFISSKNQDYTFNLTLQV NKAET  
KICDLGLEKINLYLGNDTYMSSTLLLYMHSYLKELKI QSLDTEEFFLNTY NIEKIGL  
NPDESSLSYNDLGFEAFSLLREYFFMPHKFNFLRINGLDILNQCQGTINIEFKFSKP  
FPANCIFRKELLSLGMTPIINIFAKSAEPLINNHKKDSYRIFVDRSQPKAYEIIQTLQ  
VKAHNSEGGKRL LKNYKSFERFEFLKDNQKDFYSVNTKKNSKGEVFSEISFFSSYLID  
ETISIDLLCSNGDLP SKLKIGDINTCNLKGVDTKNVEIPSETRRCSVDGNLLWKLVS  
LSFSYQTILSKQAF FGVLESYSFLDNQSNWKIYKLLQEAIIDIQSKSTYLIDENITKK

GTVAIFSIKDSKFYTLGEVYLLGLIISKFLASFASINSFCELKIKCLDSKEILHYPAS  
 FGKKALI"

gene complement(4193..4585)  
 /locus\_tag="FHGGBLIP\_00003"

CDS complement(4193..4585)  
 /locus\_tag="FHGGBLIP\_00003"  
 /inference="ab initio prediction:Prodigal:002006"  
 /inference="similar to AA sequence:RefSeq:CKG87312.1"  
 /codon\_start=1  
 /transl\_table=11  
 /product="type VI secretion system lysozyme-like protein"  
 /protein\_id="Prokka:FHGGBLIP\_00003"  
 /translation="MSLLDKLIHNLDEQNIHIPFYQNDQFEDVKNNIKVLLNAKINDCY  
 AVKNLGMADINLNSNELCVSMAKEIRKLIDNYEKRICVVSITYDNSLSPWQLSFI  
 VKCFFQDDRFKEFNIEIIFKNRNYCEVK"

gene complement(4588..6042)  
 /locus\_tag="FHGGBLIP\_00004"

CDS complement(4588..6042)  
 /locus\_tag="FHGGBLIP\_00004"  
 /inference="ab initio prediction:Prodigal:002006"  
 /inference="similar to AA sequence:RefSeq:AJK71143.1"  
 /codon\_start=1  
 /transl\_table=11  
 /product="type VI secretion protein"  
 /protein\_id="Prokka:FHGGBLIP\_00004"  
 /translation="MANTKVIDTPIIEQIMEKSKYSKTDESYSIAKRGVAEFISEIVK  
 SDNAEEKINKFALDEMIHIDHLLSKQMDEVLNHEEFQKLESTWRGLRFLVERTDFNE  
 NIKIDLFDITKEEALEDNFENPDITQSIVYKNIYSSEYQFGGEPVGAIIIGDYQLGSA  
 SPDMTFLNKMASIAAMSHSPFLTSFGPKFFGLDDYSELASIQDLQGLLEGPQYTRWRT  
 FRENEDSKYTGLLVTRFLARSPYDPEENPIKSFNYKENVHTSHNHLWANSSYTFCTR  
 LTESFAKYRWCGNIIGPKSGGTVRDLPTYLYENFGTIQSKIPTEVLITDRREYELAEA  
 GFITLTLRRDSNNAAFFSANSPLKPKIFQNTPEGKEAETNYRLGTQLPYIFLISRLAH  
 YLKVLQREEIGSWKERSDIENGLNEWIRQYISDQENPPSEVRSRRPFRAAQVKVDDIP  
 GEPGWYKIGLSVRPHFKYMGGNFELSLVGKLDKE"

gene complement(6044..6529)  
 /locus\_tag="FHGGBLIP\_00005"

CDS complement(6044..6529)  
 /locus\_tag="FHGGBLIP\_00005"  
 /inference="ab initio prediction:Prodigal:002006"  
 /inference="similar to AA sequence:RefSeq:AJK71142.1"  
 /codon\_start=1  
 /transl\_table=11  
 /product="type VI secretion protein"  
 /protein\_id="Prokka:FHGGBLIP\_00005"  
 /translation="MSDGSHPKERINITYKAKTNGQNEDELPLKLMVMANLKGKNE  
 TPLEEREILQINKINFDQVMRKLDTTTSFSVKNTLGTGAEELDVKLNIAKDFSPDS  
 LAKQIPELNKLLQLREALMALKGPMGNIPDFRKAVLEALKNEKTKEKLLLEIKQEEQ  
 N"

gene complement(6598..7845)  
 /locus\_tag="FHGGBLIP\_00006"

CDS complement(6598..7845)  
 /locus\_tag="FHGGBLIP\_00006"  
 /inference="ab initio prediction:Prodigal:002006"  
 /inference="similar to AA sequence:RefSeq:AJK71141.1"

```

/codon_start=1
/transl_table=11
/product="nucleobase:cation symporter"
/protein_id="Prokka:FHGGBLIP_00006"
/translation="MSFCDQLKNNLDELQEFHLLLEDEMSKYKTLNHNENISWDKVYQYS
QFILLHSLDFKVCNYFLLSCFNLNNEECFEKLLLLFQHLKCLMDENNTYILAQRKI
QIFIQNFIEYKTKVPVSSEIINQFIALFSEFENLLSCNFAKIEIAQVVPQLPKSPV
TQVSINIRSDNINSLNEREYKNFYQKLAPELLLEEDENLNLIYALFTQAMWGKIKCLPE
CNNEKITKIRKPDTDIIRILLSDKKNDIEYIKCFMHLELILNPFWIEGVQLFCNFLEKK
KKNKQLDILIIILTSDFISKFDTIELLRQNGDFICKEEVYKYFVKPKENKKSFFSSKK
TDKEHTLQDFEQMLMNIDKENFNNSIMNINSLLDVMKIFESKGMKKNKSKILNIYLVE
LMEKTLKDYLAEEYENAKNKIK"
gene 7969..8415
/locus_tag="FHGGBLIP_00007"
CDS 7969..8415
/locus_tag="FHGGBLIP_00007"
/inference="ab initio prediction:Prodigal:002006"
/inference="similar to AA sequence:RefSeq:AJK71140.1"
/codon_start=1
/transl_table=11
/product="type VI secretion protein"
/protein_id="Prokka:FHGGBLIP_00007"
/translation="MFCKKSLFLLPLFFCACSSVSVKINNIENSNLNRRHDDVPVT
AIIYQLKDIKKFEEASDIDLATREDGVLGKDKLDSIKTQIAPKDNIIALKVDEGEVPY
VGVLVLFANNTKKVTKIWAKTEDANGFGKNKYLKFESISKEGIKRIK"
gene 8425..9822
/locus_tag="FHGGBLIP_00008"
CDS 8425..9822
/locus_tag="FHGGBLIP_00008"
/inference="ab initio prediction:Prodigal:002006"
/inference="similar to AA sequence:RefSeq:AJK71139.1"
/codon_start=1
/transl_table=11
/product="type VI secretion protein"
/protein_id="Prokka:FHGGBLIP_00008"
/translation="MANKLKVAWFDGLNIGQTHFEQQRFFNRNIDLKTINIYSNLYG
IIDLEFSQEMLLQGKIALSKISGIAQDGSIFNAPEQDLLPEPIEINYESLIDSVVVLK
IPIGVTDIADLSLRNTFPNSKYICLRNSIALRNYDDSKSNAMDKIEDEYELNLTFTQ
EKKDLLLASLRLKLGILGNSTPDELELPIAKIKNIDINKKIELESDFIPTCLNISKIS
TIRSFLEEIIIFSINQHKKVLSNVFKGIDQTKNTLDFSTFLSLNLLKKWYLIFSHLSKK
DKIHPEFLYEKFLFQGELAAFSNEESFLDFIPYKHDONLYNTFLNMMNLRLLFSKIT
SPKYFIAKTSISGNFYDFIFDNSGILEDAEIYFAIRADVATEYLLNMFKIQSKIHTQ
SKIKNIVATQLEGLNVDQVPNPSSIPYLNQYVYKIDKRDQLFKDFKNESIISMVLT
NNIKNPDIIMWAVFQ"
gene 9819..10592
/locus_tag="FHGGBLIP_00009"
CDS 9819..10592
/locus_tag="FHGGBLIP_00009"
/inference="ab initio prediction:Prodigal:002006"
/inference="similar to AA sequence:RefSeq:AJK71138.1"
/codon_start=1
/transl_table=11
/product="glutamyl-tRNA amidotransferase"
/protein_id="Prokka:FHGGBLIP_00009"

```

```

/translation="MKEINEEKKALSLLLDSNFDGLKNNKIIDYSLELLLLLSYRLSKI
SSMDTSNINQLRETLINKILDITAKLSMCKEYDEKEIIFKFKYCLCVFIDESLMKNELF
INFWAHNTLTVRLFDET LGNNFYDIASSWINNPFKFKDFLEFIYACLILGYKGYNE
AKDRDEKIIHFCNNIATSLRPVYKTEEDLAFNKAYKIGLKEDIWQKFIRLYFKLIII
VPLIVLGVLSFAIFNLETNNLKVDNNISVLIKNLTHIK"
gene 10818..11390
/locus_tag="FHGGBLIP_00010"
CDS 10818..11390
/locus_tag="FHGGBLIP_00010"
/inference="ab initio prediction:Prodigal:002006"
/codon_start=1
/transl_table=11
/product="hypothetical protein"
/protein_id="Prokka:FHGGBLIP_00010"
/translation="MTYILLIIISTILSYLILKFIYKIIFKSTKSVSKFLVFLGSIG
LIIFYYPYSYYLEPSFYKFEICKLDPEIYQANGSKLDEEYNNKVLRYFDTDLDNMS
KSYQELGVTNDKKYSRYWFETWIDGRTEISFEIWFKSNIAIKDNIDFSIKPFFYANW
DKMRPLPAGNEGIGFFLGSVPISCIYFKKD"
gene 11394..11495
/locus_tag="FHGGBLIP_00011"
CDS 11394..11495
/locus_tag="FHGGBLIP_00011"
/inference="ab initio prediction:Prodigal:002006"
/codon_start=1
/transl_table=11
/product="hypothetical protein"
/protein_id="Prokka:FHGGBLIP_00011"
/translation="MKNKAVINKLKDNSELAWASYGYFHLATSKAIE"
gene 11492..11920
/locus_tag="FHGGBLIP_00012"
CDS 11492..11920
/locus_tag="FHGGBLIP_00012"
/inference="ab initio prediction:Prodigal:002006"
/codon_start=1
/transl_table=11
/product="hypothetical protein"
/protein_id="Prokka:FHGGBLIP_00012"
/translation="MKKYKKILVLLSPIILIIILFYTPFIYPSYWEFRGLCKLNYPKS
EEKYNTILAYFDKSLDGSIGKNGYAKIGYSNRIDLGVYIYYKNPNKTLTFKNINKIY
FRPIWKNYAPNIYGNMDFRLKLDGEIDCRSLLGELGG"
gene 11913..12146
/locus_tag="FHGGBLIP_00013"
CDS 11913..12146
/locus_tag="FHGGBLIP_00013"
/inference="ab initio prediction:Prodigal:002006"
/inference="similar to AA sequence:RefSeq:AVS37480.1"
/note="DUF2974 domain-containing protein"
/codon_start=1
/transl_table=11
/product="hypothetical protein"
/protein_id="Prokka:FHGGBLIP_00013"
/translation="MDNKQQINKLRDMAELAWAAYGYFHVVDNKFIDKDEDKIVTFED
VLDITYKNSKIIDERGFKIGTLNGDFSPLQAKQ"
gene 12227..12865

```

```

CDS      /locus_tag="FHGGBLIP_00014"
         12227..12865
         /locus_tag="FHGGBLIP_00014"
         /inference="ab initio prediction:Prodigal:002006"
         /codon_start=1
         /transl_table=11
         /product="hypothetical protein"
         /protein_id="Prokka:FHGGBLIP_00014"
         /translation="MLEFFVNULLIFILIFFFVFIFSIILYFIFKIFYKLNKTKTIN
FKTMFKKLALFLLPVYLLLFLAGGCSYKYMDPQYYEFKKLCKDNSNKMIVFNKDYLDL
KKQFVQAMTNNINIRIKNNGIKYFYNEKLNLEIQPSNWKEIETKSREIKLGIGKVKEK
EIEAWYIDDKNNIKYQEFKRYLYYNYSIFLEGDEGAGFHFEYEEILDCGDVR"
gene     12906..13034
CDS      /locus_tag="FHGGBLIP_00015"
         12906..13034
         /locus_tag="FHGGBLIP_00015"
         /inference="ab initio prediction:Prodigal:002006"
         /codon_start=1
         /transl_table=11
         /product="hypothetical protein"
         /protein_id="Prokka:FHGGBLIP_00015"
         /translation="MSKNIKTQQAKLDLIAKFLDYANVADASYAMLHWIDYVKKRK"

```

ORIGIN

```

1  catcagtata aatagtat tctcacttt ctatattcctt actctctcct ataacaatac
61  cttgagtatt atgaggggct ttaggcttag ctttaaaact tggagtaaag ataataattct
121 ttttaataaa agttaaagta ttagaataag acttacttaa atttaaactt tttaaattta
181 aatgatcatt agtattgata gaattagcta gtaaagcatc atctattaag atttgagtat
241 tggcaataat aataaagtct ttaagcaaag aagctttatc ttgactttta gtatcttcat
301 catcactcaa tccactcaa ttaaattcct tataatttaa agtgataaaa tctccaagc
361 taagatgata aatattactt tttgctagta agctttcatt taagatcaag gctctttttt
421 ctttaagaga aggcttagtc tttaaatcaa tacttcttgt aaaagaatat tcaactctcat
481 aaaaatgttc attataataa gctttgttat taagttcttg ttcataagga actttactag
541 agtgtaaaga taaaagatgt aaaggagtat tagcattgat actagaatgt gtaaaagcat
601 tagttcttaa actttgctct ttatagatag aagaaataca agcttgattt aaaatattat
661 tcacattagg attgtactca atttctttat tttttacatt tttatacaca tcacaaaaat
721 aatagtggtt ttcacttca taaaaaaaga ttccattatt gtgagctaag cttgtgataa
781 attctaaatc gctttcattg tattgagaga tgagttcttg ttcttcataa ttaaaatgta
841 tatgagaata atcaatttct ttatgtaaga tatcttgata aaaaccaagg gtttgtttaa
901 tcacttctat gatatgagta tgagtataaa tacgattggc tttatttaaa gaaagtctta
961 tcaagactga ttgaagctta aaagaaaaaa aatgcttgta ttttatttgc ttagtgtttg
1021 aagtgcctatc attgatattt aaagcactct catgattgat acctagatat tttatataag
1081 tgatgattcc tttatagttt tttacttcat tatgatcaaa gtttaaggta ttgttctcat
1141 aaggattatg gatacttaaa atagcttctt tatcgattaa aacattagga tgaaaattaa
1201 aagttgtagg ggtgcttgga tgagatgaag cattgggttaa agtattttaa gaaaataaat
1261 cttgttctaa actttcaaaa aagccttcac attctataga aaaaagctct tcaagacttt
1321 cttgatgag ggccttagtg attttaagg gtaggggatt tgaagtatga tttaatatat
1381 caagactcat ataagaatta agggacattg atgaccttt tgggtttgtt gatgattaat
1441 agcctatagc ttatgtgatt ttttttagca taagggtgggt aaaataaagt ttttttagg
1501 gtatggttta tgggtaaaga gagattgtgg tttttgaaa taaaatttta aatatatttt
1561 tgtgttaggc tattcgcata gtttcatata tactattgta ttttttttt gtgcattgcc
1621 taaaattttt gcccaaccaa gtttggcagt attttcatct cctaacacaa acttcatttc
1681 tgaagaatag ttgattttta gatataaatc aacacaaaat tcattatttg ttaaaaacat
1741 tatactattt ttcaaatcat catgtttggg tccattgggc ataaatttaa cggcttcttg
1801 atatgaaata tcttttatat aaattgctat tttgttttga taagagataa atttatcgcc

```



1861 caatataaag ttatttccta gggatgatt ttttatccct agtttatttt tttgagaatc  
1921 tgaatataaa atttgatggg gtaaattttc aataattgat aattttatcct taagtttaaa  
1981 attgacttgt aaaactcttt caatgtgtgt tttaggtcgt cttaaactta gtagtaaagg  
2041 tgcaaatggg aaatattttt ttgcgatatc atgttcttta attcctaata tattaacaa  
2101 aatttgcgaa atcgaatcct tgaatttttc attaaaagat ctagggtaat tttttaaact  
2161 gactacatca aaaaatatcc aaagcaaata atgattaaaa aaatcaaaaa ataaagtcca  
2221 accttgctct gcatcttcat ttcttgataa tttatctaac ataaatgaag gaagttgcga  
2281 agagactcca tgtaacccca tgaattttat aaacaattct acaactgatt gttcatgttc  
2341 tgaaaaaatg attttttcta tatctttatt tggatgtttt aaacttttat ttgttcttaa  
2401 aaatatattc tttcttccat agtctttttc tagttttttt attaatftaa aaaaactata  
2461 tgaagcaaga tcattcatat taaagctttt tttccaaagg aggcaggata atgtaaaatt  
2521 tcttttgagt caaggcattt tatctttaat tcacaaaagg agttaatact agcaaaagat  
2581 gctaaaaaatt tagatataat caatcctaataaatataacct cgcctaaagt ataaaatttc  
2641 gaatctttaa tactaaaaat agctacgggt ctttttttg tgatattttc atctattaaa  
2701 taagtacttt tgctttgaat atcaattata gcttcttgta aaagcttata aatcttcaa  
2761 tttgattggg tatctaaaaa gctatagcct tccaacacac caaaaaaagc ttgtttgctc  
2821 aatatggttt gatatgaaaa agataatata gaaacaagct tccataataa gttaccatca  
2881 aactacatc ttcttgtttc gctcggaatt tccacatttt tgggtgctgac accttttagg  
2941 ttgcaggtat tgatataacc ttttttaat tttgaaggca aatctccatt agagcataaa  
3001 agatcaatac ttatagtttc atctatcaaa taagaggaaa aaaaggaaat ttcgctaaat  
3061 acctctccct tagaattcct tttgggtattt acactataaa aatctttttg attatctttt  
3121 aaaaattcaa agcgttcaaa acttttatag ttttttaata gccttttacc gccttacta  
3181 ttatgctgct taactttagt tgtctgtatg atttcataag ctttaggttg acttctatcc  
3241 acaaaaattc tataactgtc ttttttatga ttatttataa gaggttctgc actttttgca  
3301 aagatattga taataggcgt catgcctaaa gaaagcaatt cttttctaaa aatacaattt  
3361 gccggaaatg gtttgagaa tttaaattca atattaattg tctttccttg gcaattattt  
3421 aaaatatcta aaccattgat tcttaaaaaa ttaaacttat gtggcataaa aaaatattct  
3481 ctaacaaaag aaaaagcttc aaaacctaaa tcattataag ataagctact tcatctgga  
3541 ttaaatccta ttttttcaat attataggta ttaagaaaaa attcttcatc ggtatctaaa  
3601 ctttgaattt ttaattcttt taaataagaa tgcatgtata acaataaagt gctagacata  
3661 taagtatcat tacctagata taaattaatt ttttctaaac ccaaatcaca ttttttggtt  
3721 tctgctttat taacttgtaa tgttaaattg aaagtataat cttgattttt actagatata  
3781 aaaacttcat tgatggagat aggataaaga tagacatcat aaactgtttt aaattcgcaa  
3841 acacatttat ctatcggttt tgatttaata agagttcctt tgggaatgat taaattgttt  
3901 tctttactat tttgttcaaa tttaaattct tgcatacata aagaaggtaa aggatttgta  
3961 tagtttgggg aaatgatatt gattagggac tctgctatat gtggtatatt tcatcaagc  
4021 tcttgatgaa ttttagaact gagaatggct aaattttcaa taatcctttc tatatcagga  
4081 tctttactat cgtatgctaa aaatggagtt agttttggat agttttttat aaaatgctct  
4141 cttttttcat atagatattc aagttctttt tggtaataaa aaatattatc cttcatttaa  
4201 cctcgcaata tctattattt ttaaagatga tttctatatt gaattcttta aaacgatcat  
4261 cctgaaagaa acattttaca ataaaagaaa gttgccaagg acttaaaactg ttatcgtaag  
4321 tgatagaaac tacacatatt cttttttcat agttatcaat cagttttctt atttccttag  
4381 ccattgatac gcataattca ttagagttaa gattaatatc agccatatta ggcattccta  
4441 agttttttac agcgtaaaca tcattaattt ttgcattgag caaaacctt atattgtttt  
4501 ttacatcttc aaaatcattt tggtaaaatg gaatatgaat gttttgctcg tctaaattat  
4561 gaatcagttt atctagcagg gacattatta ttctttatct aattttccta ctaaagaaag  
4621 ttcaaaatta ccaccatata atttaaaatg aggtcggacg cttagtctta ttttatacca  
4681 tcttggtctt cctgggtatat catcaacttt cacttgtgct gctctgaatg gacgacgact  
4741 tcttacttca gaaggtggat tttcttgatc ggaaatata tgtctaacc attcgttaag  
4801 accattttcg atatcgcttc tttctttcca gctccctatt tcttctcggt gtaaaacctt  
4861 taaatagtc gccaatcttg aaattaaaaa gatatatgga agctgagttc ctagtctata  
4921 atttgtttca gcttctttac cttctgggggt attttgaaat atctttgggt ttaatggaga  
4981 atttgctgaa aaaaaagctg cattattact atctcttctt agtgttaaag ttataaaacc  
5041 tgcttcagca agttcactat ctctcctatc tgtaatacaa acttctgtag gttttttgga

5101 ttgtatagtt ccaaaatfff cataaagata agtaggtaga tccctaacag tccctccgct  
5161 ttttggtcct ataattttgc cgcaccatct atacttagca aagctttccg ttaattttgt  
5221 gcaaaaagta tatgaagaat tagcccacaa taaatgatta tgtgaagtat gaacattttc  
5281 tttatagtta aagcttttaa tagggttttc ttcagggtca taagggtctt ttgctaataa  
5341 tcttgttact aacaagcctg tatattttaga gtcttcattt tctctaaaag ttctccatct  
5401 tgtatattga ggtccttcta gcaaaccttg taaatcttga atacttgcaa gctcagaata  
5461 atcatcaagc ccaaaaaact ttggtcctaa agatgtcaaa aagggagaat gactcatagc  
5521 tgcaatacta gccattttat ttaaaaaagt catatcaggg cttgctgata caagttgata  
5581 atctccgatg attgctccta cgggttctcc tccaaattgt ccatattctg aagaataaat  
5641 atttttataa acaatacttt gtgtgatgtc tggattattt tcaaaatcct ctaaggcttc  
5701 ttcttttggt atatcaaata ggtcagattt tatattttca ttaaaatcag ttctttcaac  
5761 cagaaatcta agtccgcgcc aagtagattc aagtttttga aattcttcat tatgtaaaac  
5821 ttcattccatt tgttttgaga gtaaattggtc aatatgggct atcatttcat caagtgcaaa  
5881 tttattgatt ttttcttcgg cattatcgct ttttacaatt tctgaaataa attcagcaac  
5941 acctcttttg gcaatactat aactttcatc agtttttagag tatttgcttt tctccataat  
6001 ttgttcaata attggcgtat caattacttt ggtattttgct attttaattt cttgtctctt  
6061 cttgtttaat ttctaaaagt aacttttctt tagttttttc attttttaac gcttctaaaa  
6121 cagcttttct aaaatcagga atattacca taggacctt taaagccatt aaagcttctc  
6181 ttagctgcaa taatttgttt aactcaggta tttgtttagc taagctatct ggagaaaaat  
6241 cttcatact agcaatattg agcttaacat caagctcttc agctcctggt ccaagagtat  
6301 tttttacgct aaaactcgtt gttatatcga gttttctcat aacttgatca aaattaatct  
6361 tgtaatttg caaaatttct ctttctccta aagggtttc gttttttcct tttaaatttg  
6421 ccattaccat taattttaac ggcagctcca catcctcatt ttgtccatta gttttagctt  
6481 tatatgtaat attaattcgt tcctttggag catgagatcc atctgacatt ttaaattcct  
6541 aaaaataaaa attttagctt aattattata ttaaaatttg ctaaatttaa tcttgcatca  
6601 ttttaattta tttttgctg tttcatattc ttcggctaga taatctttta gtagagtttt  
6661 ttccattaat tctactaaat atatatttaa aatttttagag ttctttttca ttccttttga  
6721 ttcaaaaatt tttaccatat ctagcaagga attaatatta ttcataatag aattattaaa  
6781 attttcctta tcaatattca tcagcatttg ctcaaaatct tgtaatgtat gttctttgtc  
6841 agttttttta cttgaaaaaa aacttttttt attttctttg ggtttaacga aatatttata  
6901 aacttcttct ttgcagataa agtcaccatt ttggaaacgg agaagttcaa tagtatcaaa  
6961 tttagaaata aaatcacttg ttaatattat aagaatgtct aattgtttat ttttttctt  
7021 tttctctaaa aaattacaaa agagttgcac accctctatc caaaaaggat ttaaaataag  
7081 ttcattgcata aaacatttaa tatattctat atcatttttt ttatcagaaa gcaatatacg  
7141 aattatatcc gtatcagggt ttcttatttt ggtaattttt tcattattac attcgggcaa  
7201 acacttgatt tttcccaca ttgcttgggt gaataaagcg tagatattga gattgttttc  
7261 atcctcttcc aaaagttcaa atgcaagttt ttgataaaaa tttttatatt ctctctcgtt  
7321 taaagagtta atattatcac ttctgatggt tatagatact tgggttacag gagattttgg  
7381 aagttgtggt acaacttgag caatttcaat ttttgcaaaa ttacaagata gtaaattttc  
7441 aaattcggaa aataaagcaa taaattgatt aataatctca gatgatacag gtacttttgt  
7501 tttattatat tcttgaataa aattttgaat aaaaatttga atttttcgct tttgagctaa  
7561 tatataagta ttattttcat ccataagttt ttttaaatgt tgaaaaagaa gcaaaagttt  
7621 ttcaaacat tcttcattgt ttaaattgaa gcacgataaa agaaaatagt tacaactttt  
7681 aaaatctaaa gaatgatgca ataataaaa ttgagaatat tgataaactt tatccaaga  
7741 aatattttca tgattttaaag tcttatattt tgacatctca tcttcaagta agtgaaattc  
7801 ttgtagctca tctaaattat tttttaattg gtcacaaaaa gacattttaa tcttcaaaa  
7861 atttgcctca ttataattaa attttaaaaa atattatggt aattttttta aaaaaattac  
7921 ccaaattaat cacaaattat attattatag aaaggatacc ttagttttat gttttgtaaa  
7981 aaaagcttat tttttttatt gccgttgttc ttttgtgctt gctcaagtgt tgttagtgtt  
8041 aagataaata atatagaaaa ttccaatctt aataacagac atgatgatgt tctgtttaca  
8101 gctattatat atcaacttaa ggatattaaa aaatttgaag aagcaagtga tatagatttg  
8161 gccactagag aagatggagt attgggcaag gataagcttg attctattaa aacgcaaatt  
8221 gcacctaaag acaatattat cgcacttaa gtgatgaag gagaggttcc ttatgtaggt  
8281 gttcttgtat tgtttgcaaa taatacaaaa aaagtaacaa aatatgggc aaagaccgaa

8341 gatgcaaatg ggtttggaaa gaataagtat ttaaaatttg aatatccaa agaaggtatt  
8401 aaaagaatta aataggaatg atatatggca aataaattaa aagttgcttg gtttgatggg  
8461 cttaatattg gacaaacca ttttgagcag caagaaagat tttttaatag aaatatagat  
8521 cttaaaacta taaatatata tagtaattta tatggaataa tagacttggga attttctcaa  
8581 gagatgttat tgcaaggaaa aattgcactt tctaaaattt caggatttgc gcaagatgga  
8641 agtattttta atgcacctga gcaagatttg ttaccggaac ctatcgaat caattatgaa  
8701 tctttaattg attcagttgt ggtattaaaa attcctattg gagttactga tattgctgat  
8761 ttgtctttaa gaaacacttt tccaaattca aagtatatat gtcttcgaaa tagtattgct  
8821 ttaagaaatt atgatgattc aaaatccaac gcaatggaca aaattgaaga tgagtacgaa  
8881 cttgaaaatc tgacttttac gcaagagaaa aaagatctac ttcttgctag ttttaagatta  
8941 aaactcggca ttttaggcaa ttcaactcct gatgaacttg aattgccaat tgcaaaaatt  
9001 aaaaatcag atatacaata aaaaatcgaa ttagaaagtg attttatacc cacttgttta  
9061 aatatcagta aaatatctac cataagatcc tttttagaag aaatcatttt ttcaatcaat  
9121 caacataaaa aagttctatc taatgttttc aaaggaattg accaaacaaa aaatacattg  
9181 gatttttagta cttttttatc tcttaatctt ttaaaaaaat ggtatttaat attttcacat  
9241 ctatcaaaaa aagataaaat acatcctgaa tttttatag aaaaattttt agaatttcaa  
9301 ggagagcttg cagcttttag taatgaagaa tcttttttag attttattcc ttataaacat  
9361 gataatcttt ataatacttt tttaaatatg atgaataatc taagattggt attttccaaa  
9421 atcacaagtc ctaaataattt tatagctaag accagtatta gtggcaatgg tttttatgat  
9481 tttatttttg ataactcggg aatttttagag gatgctgaaa tttattttgc aattcgtgca  
9541 gatgttgcta cagaatatct acttaataat tttaaaattc aaagcaagat acatacgcaa  
9601 agtaaaatta aaaatatagt agcaacacag cttgaaggct taaatgtaga tcaagtacct  
9661 aatgttccat ctagtattcc ttatttaaat ggttatgttt attataaaat agataaaaaga  
9721 gatcagctgt ttaaagattt taaaaatgaa agtattatta gcatgtactt gaccaacaat  
9781 ataaaaatc ctgatattat aatgtggcg gtatttcaat gaaagaaata aacgaagaaa  
9841 aaaaggcatt aagcttactt cttgattcaa attttgatgg tttaaaaaac aataaaaatta  
9901 ttgattattc tttggagtta cttttgcttt cttacaggct ttcaaaaata agctctatgg  
9961 atacaagtaa tattaatcaa cttagagaaa cattgattaa taaaatttta gatataaccg  
10021 ctaaactaag tatgtgtaaa gaatatgatg aaaaagaaat tattaatttc aaatattgtc  
10081 tttgtgtctt tatagatgaa agcttgatga aaaatgaact ttttatcaat ttttgggctc  
10141 acaatactct aactgtaaga ttatttgatg aaaccttagg tggaaataat ttttatgata  
10201 ttgcatcatc ttggattaat aatcctttta agtttaaaaga ttttttggaa tttatttatg  
10261 cttgtttgat tcttggttat aaaggaaaat ataatgaggc taaggataga gatgaaaaaa  
10321 taatccattt ttgcaataat attgccacat ctttaagacc agtttataag acagaagaag  
10381 atctagcttt taacaaagca tacaaaattg gtttaaagga agatatttgg caaaaattta  
10441 taagattgta ttttaaaaaa cttattatca ttgtgccagt attgattgta ttaggagtat  
10501 taagctttgc aatttttaat ttagaaacca ataacttaa agtggataac aatatatctg  
10561 tattgataaa aaatttaaca catataaaat aaagatatta aattttttaa atatcaattt  
10621 atttgttatg agtaaaaatta aataaaaatt attttacagt tagaataaaa atcaaatgca  
10681 aatttaaagg ataaaaatat atgaaaaaac aagctctatt attttaatga taagaaaaaa  
10741 gttatactgc taacactaaa ccacaaaatt acatcttaat ttttaataaaa tagataatct  
10801 aaaggaaata acttataatg acatacatat tacttcttat tataatttct actattcttt  
10861 cttatcttat attaaaattt atttataaaa tcatctttaa atctacaaaa agcgtttcaa  
10921 agtttttagt ctttcttggga agtataggct taattatctt ttattatact ctttattctt  
10981 attattttaga gccaaagcttt tataagttta aagaaatatg caagctagac ccagagattt  
11041 accaagccaa tggtagtaaa ttagatgagg agtattataa taaagtgcta aggtattttg  
11101 atacggattt ggataatatg tcaaagtcac ataaacaaga gctaggggta actaatgata  
11161 aaaaatatag tagatactgg tttgaaacat ggatagatgg aagaaccgaa ataagctttg  
11221 aaatatgggt taaaagtaat attgcaataa aagacaatat tgactttagt ataaaacctt  
11281 ttttttatgc taattgggat aaaatgagac ccctccagc aggtaatgag gggataggat  
11341 tttttttagg aagtgtccca ataagttgta tatatttcaa aaaggactaa acaatgaaaa  
11401 ataaagcagt gattaataag ctaaaagata attcagaact tgcttgggct agttatggat  
11461 attttcacct agcaacatct aaggcgatag aatgaaaaaa tataaaaaga ttttagtgct  
11521 attatcacca ataattttta ttatattatt ttataccctt tttatatatc ctagtatttg

```

11581 ggaatttaga gggttatgta aattaaataa ttacccaaaa agcgaggaaa aatataatac
11641 aatcttagct tattttgata agagtttaga tggtagtata ggaaaaaatg gttatgcaaa
11701 aataggttat agtaatagaa tagatntaggtgtatatt tattataaga atccaaataa
11761 caaaacatta acttttaaaa atattaataa aatatatfff agaccaatat ggaaaaacta
11821 tgcaccaa atttatggta atgaaggtaa tatggatfff agattaaagc ttgacgggta
11881 aatagattgc agaagcttat taggagagtt aggtggataa taaacaacaa atcaataaac
11941 taaggacat ggcagaactt gcatgggcag cttatggata ttttcattac gttgataata
12001 aatttgatat aaaagatgaa gataaaattg ttacctttga agatgtttta gatattacct
12061 ataaaaactc taaaattatt gatgaaagag gatttaaaat cggcactctc aatggcgact
12121 tctccccact ccaagctaaa caataaaaca ttgtccta atcaaatffag gttttagcac
12181 tgctttgtct tatgaaaaga cagagaaaat taagaggagt taataaatgc tagaattcct
12241 tgtaatcct ttaatattta ttcttatatt tttctfffft gtttttatat tttctattat
12301 cttatatttt atctttaaaa tttttataa attaaaaaat aaaacaaaaa ctataaattt
12361 taaaacaatg tttaaaaaac ttgctttatt tcttttacct gtatatcttt tattattcct
12421 agcaggagga tgttcttata aatatatgga tccgcaatat tatgaattta agaagttgtg
12481 taaagataat agtaataaaa tgatagtgtt taataaagat tttttggatt taaaaaaca
12541 atttgttcaa gctatgacga ataattctaa tattagaatt aaaaataatg gtataaaata
12601 tttttataat gaaaaattga atttggaaat tcaaccttca aattggaaag aaatagaaac
12661 taaatcacgc gaaatfaac ttggaatagg aaaagtaaaa gaaaaagaaa tagaagcttg
12721 gtatattgat gataaaaaata acattaagta tcaagaattt aaacgatatt tgtattataa
12781 ttatagtata tttttagaag gcatgagggg tgctggggtt cattttgaat atgaggaaat
12841 attagattgt ggagatgtta gataaaaaat ttaaaagcat aatgagctta agatagaat
12901 ataaaatgag caaaaacatt aaaacacaac aagctaaatt agacttaatt gctaaattct
12961 tagactatgc taatgtagct gatgctagtt atgcatggtt gcattggatt gattatgtaa
13021 aaaaaagaaa atgacaaaaa acatgaaaat ggtgatacc aaaaactagg cgataaacac
13081 aataatcaa attctactta tgcaagagct atacaagctc gttttgaaca aaataaaata
13141 gttaaaatag aacctaata ttgtatttct cttataaata cttgttttga tagtaaagaa
13201 ataacattgg ataatgatat tagtagggta ggat

```

//

```

LOCUS      FHGGBLIP_2                4242 bp    DNA        linear      12-APR-2021
DEFINITION Campylobacter species strain strain.
ACCESSION
VERSION
KEYWORDS   .
SOURCE     Campylobacter species
  ORGANISM Campylobacter species
            Unclassified.
COMMENT    Annotated using prokka 1.14.6 from
            https://github.com/tseemann/prokka.
FEATURES   Location/Qualifiers
  source    1..4242
            /organism="Campylobacter species"
            /mol_type="genomic DNA"
            /strain="strain"
  gene      complement(95..1375)
            /gene="trxB_1"
            /locus_tag="FHGGBLIP_00016"
  CDS       complement(95..1375)
            /gene="trxB_1"
            /locus_tag="FHGGBLIP_00016"
            /inference="ab initio prediction:Prodigal:002006"
            /inference="similar to AA sequence:RefSeq:CKG86610.1"
            /codon_start=1
            /transl_table=11

```

```

/product="thioredoxin reductase"
/protein_id="Prokka:FHGGBLIP_00016"
/translation="MSETYEIYTPDGSILNVEKDTNKILFTA SNGTYTKQHSQALFE
GDRILRN SPYKDYQPKYLDPNFYTG EKSTLLEFKEWQSIY LKDP IKGSIAPWTKEEKA
YYKSLKTKRERYKYLIIRSGIRSTVIDIPYDAYCNVDEKGYLINEEYAYIYDEVNNNK
ETLKSSLFRQEWGIAAGILGKPEYFVRSKNHGFNARMIQCFILYIQLTGGGYEELGIK
RGIYNYADN LLEIGIGMAGIHK NPLRAKLVKDLAKTIQPDEF GMLPFIDEIMGV DWVI
DLNQYQFAYD GKG DSTWALYDDIEKGK LKDP RDVDSTPESRKEFDEETDVYRFGNRMN
FASDIRDSRSEESTRLFDDTLILHAKLAALTPPQGYPNAPYYFTPERLEWIYKRGYLD
KLLDPRIPAIYRYNFPRELRAKILKFAEENGIKD"
gene complement(1394..4150)
/locus_tag="FHGGBLIP_00017"
CDS complement(1394..4150)
/locus_tag="FHGGBLIP_00017"
/inference="ab initio prediction:Prodigal:002006"
/inference="similar to AA sequence:RefSeq:AAW35464.1"
/note="conserved hypothetical protein"
/codon_start=1
/transl_table=11
/product="hypothetical protein"
/protein_id="Prokka:FHGGBLIP_00017"
/translation="MYLKNNAILKNLQEDIKQFIYFSYIESPNFNSSKLAEFFAQKNQ
NAQIDLNTTKMSKNYLIISNIPNKYNAGLSESLTQEIAN YNIQDKYRTIKKNIDTSKK
TYDSTRDYSEYSIEMPQDENEPYILQLSPFVKISKEAYENSKKAYEDMQEIYKYL TNF
VATPQKLPEFAKTAKEKLAISENESMIEIVKKTENLRHCERINILAYIDYNKKINDKK
WLPYFYIKKFFKQNE DKESIEKEKKIAHQYLTFLKKE LFEKSDKSSFGNYSLSDKSS
FGNYSLMECLFISFVLYQAKLIFPNINLDLKKYGGSNFVYIKYLEETYVLW TDEYPIY
VNNPTNITAYEVVSQ LKILDKKDYSFVENDSSITIDDFNELSKDL DVTNTLDKKI
IKLKQMYHLDEQKCIKEFMNLDEEAQQAFFVWMDIEKQISDLSK LLEQMYGKEYLNKA
KEQKTSEIFTYAMLKILL SASPFISFTAQMLWDFNFKTIEYVIQACIKINKEGFKEF
FKEQLGIFTPLKYHIH IKSNI I KARLQQIEKELTHTKIQMILAQEIKSNLIIQKNTS
SLNLFITKIKEYFNEKQIKIYWSDKYMKQLFIYSNQESNISKIALMHSIDIQTQKYTI
YTYAKLNKLDLASIVAGEFVGIFLNYLFPTNYKALQEYQESIVYQLYTFKDD SPLAVI
RDHFITYPFAINSKFISFDLKKIFYGIDLCTGVFDTHFSFHYEIKPNLEENKEFLLKR
LLSYLIIDEKRSALKI IKDENETILERDDYTFNQLNSIELIKSEIYILKNTTLEKY
YKEVNDEINLTAIQAYNEALQILQDFANGIYNTSKDKTKGYIEDKNKTRRLL EKLNI I
GQNNLKAMYMGIEVKEIQNQNMRENNFYQVIIGKNKDKKSPPNFIGRLATTIITEDG
LYMG"
ORIGIN

```

```

1 gccatacaaa acaatatcaa agaagataag attccttttg agaatcttac cctaaaagca
61 ttggaaaagt atattaaaga ttttgagtga ttttttaatc tttaatgcca ttttcttcag
121 caaatcttag tatcttagct ctaagttccc ttgggaaatt atatctataa atagcaggga
181 ttcttgatc aaggagttaa tctaaatatc ctcttttata aatccattcc aatctttcag
241 gtgtaaaata ataaggagca ttaggatagc cttgaggagg agtgagggct gcgagtttag
301 catgaagtat taaagtatca tcaaataatc tagttgattc ttcacttcta ctatcacgaa
361 tatcagaggc aaaattcatt ctgttaccac atctataaac gtcagtttct tcatcaaatt
421 ctttctgct ttcaggagta gaatccacat ctcttgatc ttttaatttg cttttttcaa
481 tatcatcata taaagcccaa gtagaatcac ctttaccgtc atacgcaaat tgatactgat
541 ttaaataaat cacccaatct actcccataa tctcatctat aaaaggtagc atgccaat
601 catcaggctg tatagtttta gctaaatctt ttaccaatctt agcccttaa ggatttttat
661 gtatccctgc catacctata cctatttcta aaagattatc agcataatta taaattcctc
721 tttttatacc taattcttca tctctccac ctgtgagttg aatatataaa ataaaacatt
781 gtatcattct agcattaaag ccatgatttt tagaacgcac aaaatattca ggtttttccta
841 gtattcctgc tgctataacc cattctgtgc taaaaagaga agattttaag gtttctttat

```

901 tattgttaac ttcatacataa atatagcgt attcttcatt gattaaatat cctttttcat  
961 ctacattaca ataagcatca tagggatat ctataacagt gcttcttata ccacttctta  
1021 taattaaata tttatatctt tctcttttgg ttttaaaaga tttataataa gctttttctt  
1081 ctttagtcca aggagctatg cttcctttga taggatcttt taaatatatg ctttgccatt  
1141 ctttaaattc aagtaaagtg gatttctctc ctgtataaaa gttaggatct agatacttgg  
1201 gttgatagtc tttgtagggg gagtttctta atatgcggtc accctcgaag agagcttgcg  
1261 aatgttgttt agtgtatgta ccattgcttt ttgccgtaaa taatattttg tttgtatctt  
1321 tttctacatt taatattgaa ccactctggg tataaatctc ataagtttcg ctcattatctt  
1381 atcctttcct aatttaacc atatataaac catcttctgt gattatagta gtggctagtc  
1441 tacctatgaa gttaggcggg gattttttgt ctttattttt acctattatc acttgataaa  
1501 agttattttc tctcatttgg ttttgatttt gtatctcttt tacttcaatc cccatataca  
1561 tagctttaag attgttttgt cctatgatat tgagtttttc tagtaatctt ctggttttat  
1621 ttttatcttc tatatatttt cctgtttttat ctttacttgt attataaatt ccattagcaa  
1681 aatcttgtaa aatttgtaaa gcttcattgt aagcttgaat ggctgttaaa ttgatttcat  
1741 cattaacttc tttataatac ttttctaag tagtgttttt taggatataa atttcagatt  
1801 taatgagttc tatactatctt aaactttgat taaaaaaagt ataatcatct ctttctagta  
1861 tggtttcggt ttcactcttt attatcttta aagccgatct tttctcatca ataatcaaat  
1921 aagacaaaag tctttttaa agaaattctt tattttcttc aagatttggg tttatttcat  
1981 aatgaaagga aaaatgagtg tcaaaaactc ctgtgcaaag atctatgcca taaaaaattt  
2041 tcttaaatc aaagctaag aattttgaat tgattgcaa aggataagtt ataaaatgat  
2101 ctcttataac cgccaaagga gaatcatctt taaagggtgta aagctgataa acaatgcttt  
2161 catattgttc ttgcagggct ttataatttg ttggaaagag ataattttaa aaaataccca  
2221 caaattctcc agccacaata gaagcaaggt caagtttatt tagcttagca taagtataaa  
2281 tagtatattt ttgagtttgt atatctatgc tatgcataag agcaatttta gatataattgc  
2341 tttcttgatt agagtatata aataattgtt tcatatattt atcactcaa taaatcttaa  
2401 tttgtttttc attaaagtat tcttttatct ttgtgataaa tagattttaa ctggatgtat  
2461 ttttttgat tattaaattg gattttatct cttgtgctaa aatcatttgg attttagtat  
2521 gagttaattc ttttctatt tgttgcaagc gcgcttttat tattaaatta gattttatgt  
2581 gtatatgata ttttagaggt gtaaaaatac caagctgttc tttaaaaaat tctttaaattc  
2641 cttctttggt tattttaata caagcttgaa taacatattc tattgttttt aaaaaattaa  
2701 aatcccacia catttgagct gtaaagctga taaaaggact agcacttaat aaaattttta  
2761 acattgcata agtaaattt tcaactgttt tttgttcttt tgccttattt aaatattctt  
2821 ttccatacat ctgttccaaa agctttgata aatctgatat ttgtttttct atatccatcc  
2881 atacaaaaaa agcttgttgc gcttcttctg taaattcat aaattcttta atgcattttt  
2941 gttcatctaa atgatacatt tgcttcaatt tgattatttt tttatctaatt gtatttgta  
3001 catctaaatc ttttgataat tcattaaaaa aatcatctat agtgatcgaa ctatcatttt  
3061 ccacaaaaga ataacttttt ttgtcaagta tttttaataa ttgcgataca acttcatatg  
3121 ctgtaatatt tgttggctca ttattttacat atattggata ttcatctgtc cataaaacat  
3181 aagtttctc taagtatttt atatatacaa aattactgcc tccatatttt ttcaaatcca  
3241 aattgatatt tggaaaaata agcttagctt gatacaagac aaatgaaata aataaacatt  
3301 ccattaaaga atagtttcca aatgaagatt tatccgataa agaatagttt ccaaatgaag  
3361 atttatccga ttttcaaaa agctcttttt tcaaaaaagt taaatattga tgagctatctt  
3421 tttttctttt ttctatgatg gattctttgt cttcgttttg tttaaagaat tttttgatat  
3481 aaaaataagg aagccatttt ttatcattta tttttttatt gtagtcaata taagctaaaa  
3541 tgtttattcg ttcgcaatgt cgtaaatttt ccgtcttttt tactatttct atcattgact  
3601 cttttctga tattgctaatt ttttctttag ctgtttttgc gaattctggg agcttctgcg  
3661 gtgtagcaac aaaatttgtt aaatattttat aaatctcttg catatcttca taagcttttt  
3721 tactattctc ataagcttct ttggatattt tcacaaaagg gcttaattgt aaaatataag  
3781 gttcattttc atcttgtggc atttctatgc tatattcgct ataatctctt gtgctgtcat  
3841 aagttttttt tgaagtatca atattttttt taattgttct gtatttatct tgtatattat  
3901 agttggcgat ttcttgagtt aaactttcac taagtcctgc attgtattta ttggggatatt  
3961 ttgaaataat caaataattt ttactcattt tagttgtatt taaatctatt tgtgcatttt  
4021 gatttttttg tgcgaaaaat tcagctagtt tacttgagtt aaaatttggg ctttctatat  
4081 aagaaaaata aataaattgt ttaatatctt cttgcaaatt ctttaaaaaa gcattgtttt

4141 ttaaatacaa attagataat ttttgcgttg aatgaaagc gggtaaattg ctcgattttg  
4201 aatcattagc tgtattttta ctctcattgt cttttgttc tg

//

LOCUS FHGGBLIP\_3 3467 bp DNA linear 12-APR-2021

DEFINITION Campylobacter species strain strain.

ACCESSION

VERSION

KEYWORDS .

SOURCE Campylobacter species

ORGANISM Campylobacter species

Unclassified.

COMMENT Annotated using prokka 1.14.6 from  
<https://github.com/tseemann/prokka>.

FEATURES Location/Qualifiers

source

1..3467

/organism="Campylobacter species"

/mol\_type="genomic DNA"

/strain="strain"

gene

179..595

/locus\_tag="FHGGBLIP\_00018"

CDS

179..595

/locus\_tag="FHGGBLIP\_00018"

/inference="ab initio prediction:Prodigal:002006"

/codon\_start=1

/transl\_table=11

/product="hypothetical protein"

/protein\_id="Prokka:FHGGBLIP\_00018"

/translation="MVQKNDYEVVDFSDDLFYSYLVWVSLRKFIIAYDIGLYQDKNNLF

FNLATYKIHKNHSFYIEANNLNFNLIELFFSNISPLEYAVGYLQKEEIIYNGALEYS

LGTLQKTLNTTTTQFHNKFYFKLKERPFEYAQYFKQR"

gene

complement(1152..1400)

/locus\_tag="FHGGBLIP\_00019"

CDS

complement(1152..1400)

/locus\_tag="FHGGBLIP\_00019"

/inference="ab initio prediction:Prodigal:002006"

/inference="similar to AA sequence:RefSeq:AVL47240.1"

/codon\_start=1

/transl\_table=11

/product="recombinase XerC"

/protein\_id="Prokka:FHGGBLIP\_00019"

/translation="MEYLLDYQDEMINDIKTTFLINFLNYLENNLKNSNKLSKRTKI

TYLRVLTSSFISDNNDDLFLFSFDMKKLGLKQKKS"

gene

1751..2140

/locus\_tag="FHGGBLIP\_00020"

CDS

1751..2140

/locus\_tag="FHGGBLIP\_00020"

/EC\_number="3.6.1.-"

/inference="ab initio prediction:Prodigal:002006"

/inference="similar to AA sequence:RefSeq:ABS44566.1"

/codon\_start=1

/transl\_table=11

/product="F-box only protein 18"

/protein\_id="Prokka:FHGGBLIP\_00020"

/translation="MDEVQDINACVIDIMLNQQAQKVFIDTFQSIYKFRGAVISLE

ILASMPKSHTLCLTQSFRCQPNIAFIANSYLKILNAPRNFKGTKKSSNENVKNEAKAI  
 VCRTNAKLFDIAVENLDKKLFFCERDK"  
 gene 2124..2327  
 /locus\_tag="FHGGBLIP\_00021"  
 CDS 2124..2327  
 /locus\_tag="FHGGBLIP\_00021"  
 /EC\_number="3.6.1.-"  
 /inference="ab initio prediction:Prodigal:002006"  
 /inference="similar to AA sequence:RefSeq:ABS44566.1"  
 /codon\_start=1  
 /transl\_table=11  
 /product="F-box only protein 18"  
 /protein\_id="Prokka:FHGGBLIP\_00021"  
 /translation="MREINSYSFDELLDIQNLKFKKHEYIKNQFIAKFADLKEFLEYI  
 NETKEVDLKQKIFVLLNMCIAIL"  
 gene 2309..2623  
 /locus\_tag="FHGGBLIP\_00022"  
 CDS 2309..2623  
 /locus\_tag="FHGGBLIP\_00022"  
 /EC\_number="3.6.1.-"  
 /inference="ab initio prediction:Prodigal:002006"  
 /inference="similar to AA sequence:RefSeq:ABS44566.1"  
 /codon\_start=1  
 /transl\_table=11  
 /product="F-box only protein 18"  
 /protein\_id="Prokka:FHGGBLIP\_00022"  
 /translation="MHSDIIKLIKAIKSSVKKQEQTDLILSTGHKNKGLEWNNIEII  
 DDFLNIKQELEERDQITIAKEELNLLYMAITRAKNSLSISKDYLLKEFIQENLERII  
 IE"  
 gene 2620..2832  
 /locus\_tag="FHGGBLIP\_00023"  
 CDS 2620..2832  
 /locus\_tag="FHGGBLIP\_00023"  
 /inference="ab initio prediction:Prodigal:002006"  
 /inference="similar to AA sequence:RefSeq:AVL47291.1"  
 /codon\_start=1  
 /transl\_table=11  
 /product="helix-turn-helix domain-containing protein"  
 /protein\_id="Prokka:FHGGBLIP\_00023"  
 /translation="MKIIKKLQKDGSLKKQVYYSVHEVAQMHSVTHTTVRLWISRGIL  
 KGVKLGKGFYMSKETILDFQKTDGLS"  
 gene 2848..2997  
 /locus\_tag="FHGGBLIP\_00024"  
 CDS 2848..2997  
 /locus\_tag="FHGGBLIP\_00024"  
 /inference="ab initio prediction:Prodigal:002006"  
 /inference="similar to AA sequence:RefSeq:ARJ53387.1"  
 /codon\_start=1  
 /transl\_table=11  
 /product="DNA-binding protein"  
 /protein\_id="Prokka:FHGGBLIP\_00024"  
 /translation="MSSIAKDSHVEMRDFLFNKYNKITFSRKECAEILGISLQTLDRIL  
 TKDKK"

ORIGIN



1 cccctataca attatagata atttagaatt aaaaaaatat ttctttaaac tttataaaga  
61 taatattgaa tttttaactt cttatattaa tgaattaat caagttcatg gtattaaact  
121 ttaccatatac gaaaataaaa atttaaataa atttgaaacta atttcaatac tagatgagat  
181 ggtgcaaaaa aatgactatg aagtagtaga ctttagcgat gatttatattt attccttatct  
241 tgtatggagt ttgagaaaat ttatcattgc ttatgatata ggtttatatac aagataaaaa  
301 taatttatatt ttttaatttag ctacctataa aatacataag aatcattctt tttatataga  
361 agcgaataat aatttaaatt ttaatcttat tgaattattt ttctcaaata tctctccttt  
421 ggaatatgct gtgggttatt tacaaaaaga agagataata tataatggag ctttggaata  
481 ttcttttagga actcttcaaa aaactttaaa tactacaacc caatttcata ataaatttta  
541 ttttaaactg aaagaaagac ctttgaata tgcgcaatat tttaaacaaa gatagactta  
601 gctgaaataa attaaatttg ctcactttaa tgcaatcaat caggatgaaa aatcggcgtg  
661 aagactgact tatttttagaa agttttatta gaaaagatga atattaaana gtaaaagaaa  
721 tatattttat aggatttttg acataaaaaat aattataatc agcttttgca tatagttggt  
781 gtatttagat ttgcatgctt taattttttt gtataactgc aagatttggt ctttggcga  
841 ttaatttcat agctaaaagt atgctttaat aagcgcagtc ctttcttgac tattgaagct  
901 ttggcataaa tattattttac aatcataaaa gcattacttc tatttaaagc cttccctgtc  
961 ctagtttaca tcattatact tgaaacactc aaaccctca tcaatttctg cttttttata  
1021 aatacagttt attcctttact acccttgcct attatagaga tttttaatat ttcattatta  
1081 acctctttaa aatcacaag ttttacattt aacattattt agccttatag tttcattctc  
1141 gctaagataa ttttaactttt cttctgcttt ttcagtttta aacctaat tttcatatca  
1201 aagctaaaaa ggaataagtc atcattatta tcacttataa aaaagctagt taatactctc  
1261 aaataagtaa tttttgttct ttttgataat ttattgctat tttttaaatt attttccaaa  
1321 taattaagaa aattaatcaa aaaagttggt tttatatcat ttatttgcac ttcacctga  
1381 taatctagta aatattccac aagctctaaa aatacatcta taaaacaata aagtgttctt  
1441 taaatataat attatctata taaataaaaat ttcataataat ccacatacaa catcagaaat  
1501 tgataataaa tatttatctt gatttatctt attgatgttt ttaagtttta ttccaacaat  
1561 ttcataaaaac tttggtttta ttgtgtttaa tttatcttca gtataaaaaa tttatatttt  
1621 gcaattagtc ctttaacaa ttttataaat gtaaaatcta tttttcaag ttttttgcta  
1681 tacaataaat tattttataac ttcttttaat tcaacttaca aaaccaaagc tagaatatga  
1741 ttttatttta gtggatgaag ttcaggatat caatgcttgt gttattgaca ttatgcttaa  
1801 ccaaaagcaa gctaaaaaag tttttatagg agataccttt cagagtattt ataaatttag  
1861 aggagcggta atttctttag aaatattagc atctatgcca aaatctcaca ctttatgcct  
1921 aacacaaagt tttaggtgtc cgcaaaaat agctttttatc gccaaactctt atttgaaaat  
1981 tttaaatgct ccgcaaaatt tcaaaggaac aaaaaaatca agtaatgaaa atgtcaaaaa  
2041 cgaagcaaaa gccatagtggt gtagaactaa tgctaagtta tttgatatac ccgtagagaa  
2101 tttagataaa aaattatttt tttgtgagag agataaatag ttatagtttt gatgagttat  
2161 tagatataca aaatcttctt tttaaaaaac acgaatata taaaaaccaa tttatagcaa  
2221 agtttgctga tttaaaggag tttcttgaat atattaatga aaccaaagaa gttgatttaa  
2281 agcaaaaaat ctttgttctt ttaaataatgt gcatagcgat attataaagc ttattaaagc  
2341 cattgaaaaa agtagcgtaa aaaaacaaga gcaaacggac ttaattttta gtacaggaca  
2401 caagaacaaa ggcttggaaat ggaacaatat tgaattatt gatgattttt taaacatcaa  
2461 gcaagaactt gaagaaagag atcaaatcac catagcaaaa gaagaattaa accttttata  
2521 tatggcaatc acaagagcca aaaattctct aagtattagc aaagattact tacttgaaaa  
2581 agaatttata caagaaaatt tagaaaggat aataatagaa tgaaaataat taaaaatta  
2641 caaaaagatg gaagccttaa aaagcaagtt tattattctg ttcataagat tgcgcaaatg  
2701 cactcagtaa cgcatacaac agttcgccta tggatttcaa gaggaattct aaaaggcgtg  
2761 aaattaggca aaggatttta tatgtcaaaa gaaaccattc ttgattttca gaaaactgat  
2821 ggtttatcat aattaaggag agaaaaaatg agtagtatag caaaagatag tcatgttgaa  
2881 atgagagatt ttttatttaa taaatataac aaaataactt ttagcagaaa agaattgtgc  
2941 gaaattcttg ggatatcttt gcaaacttta gatagattga caaaagataa aaaataaat  
3001 caatgaatat aactcgtttt gtattattct ccattgaaga aatggctaaa attctctcag  
3061 gggctaagtt aacaaaatga atagaaaaga tagggttgcg ctacttctt atcataaaaa  
3121 taaaaagctc acttgctttg gtaagtgggc aattcaaaag tataagttaa agtatatggt  
3181 ttttagatat ttaattttta aagtatggat atttaggtat ttgattaata aatcacacgc

```
3241 cgacctcagg caccatttgt ttttttactc tcaagtgtta ttttttggca atttatatta
3301 aaatcttaaa aaagagtttt atattttcaa aaatagcttg ctgattatac tgtgtgagtt
3361 ttataatatac ttctaaagct ttgaaaaatc actaggaact ttgataatca aattttcatt
3421 ttttaagtta atttcttaaa taatagttt tattatcata gtaaaaa
```

//

LOCUS FHGGBLIP\_4 2982 bp DNA linear 12-APR-2021

DEFINITION Campylobacter species strain strain.

ACCESSION

VERSION

KEYWORDS .

SOURCE Campylobacter species

ORGANISM Campylobacter species

Unclassified.

COMMENT Annotated using prokka 1.14.6 from  
<https://github.com/tseemann/prokka>.

FEATURES

Location/Qualifiers

source

1..2982

/organism="Campylobacter species"

/mol\_type="genomic DNA"

/strain="strain"

gene

complement(415..1014)

/locus\_tag="FHGGBLIP\_00025"

CDS

complement(415..1014)

/locus\_tag="FHGGBLIP\_00025"

/inference="ab initio prediction:Prodigal:002006"

/codon\_start=1

/transl\_table=11

/product="hypothetical protein"

/protein\_id="Prokka:FHGGBLIP\_00025"

/translation="MANLSELRESLTYVIPLQELLENEEDILGEAVNRYIKKSLSHLDL  
VTNFIIESEEVYHKTKNFRKAVVHFTSNLVSGPIIAVGIVGGIRTGQVEVAVITIIHAN  
DIPVAIENATNKAFDIYDNVLDAILFIFNGTASRIITNFLNSIYERFLHQEILSKFA  
IVQKNVKYYNRIIFKILQMVPSSPHTPTLAIPKNTNLP"

gene

complement(1020..1694)

/locus\_tag="FHGGBLIP\_00026"

CDS

complement(1020..1694)

/locus\_tag="FHGGBLIP\_00026"

/inference="ab initio prediction:Prodigal:002006"

/inference="similar to AA sequence:RefSeq:CKG88211.1"

/codon\_start=1

/transl\_table=11

/product="hypothetical protein"

/protein\_id="Prokka:FHGGBLIP\_00026"

/translation="MNLFYKIYFFILYHPIKAFFILVLIVSSFSFVDFKILPKKEKEL  
SPIIQIVIKDSEIPDYISNTKSKEVFLSQNPDLFEKMATEYPLKSGLNFGKPEY  
IAGVATIEKDWGEYMEKILKEDSEELLKANSCKIIDVKSKMQCFIEKINYVFKIIDS  
QSENCTLNLINNKNFYNNLYEVIYFAFYDDEYDKNLKKEEYFFSKAYYAARVHFLANK  
QCFRME"

gene

complement(1735..2508)

/locus\_tag="FHGGBLIP\_00027"

CDS

complement(1735..2508)

/locus\_tag="FHGGBLIP\_00027"

/inference="ab initio prediction:Prodigal:002006"

/inference="similar to AA sequence:RefSeq:CKG88190.1"

```

/codon_start=1
/transl_table=11
/product="hypothetical protein"
/protein_id="Prokka:FHGGBLIP_00027"
/translation="MNKPFYKLRFYIPCGVLVLIIFISLTYHFLQRPLELIFWNKY
YHEKEYQNAKDVSKLLWNNKEEFKVKFKEQNLNQELKTNQKELLNYMHYFKDFKFMQ
ILGLDNAYLVALKNKDVLFGMQNNLDYFYFISNNTDLEEINNYLVVDELLIFMNE
IEKLPPKYNLGKIMFEINFMYNTLFFGFTLDKNFICSIPQKEQLLENMINSYKMNL
FHDVDLKFQDQELYEAIYVTKELNYFINIAKGRNLNACGK"
gene complement(2519..2971)
/locus_tag="FHGGBLIP_00028"
CDS complement(2519..2971)
/locus_tag="FHGGBLIP_00028"
/inference="ab initio prediction:Prodigal:002006"
/inference="similar to AA sequence:RefSeq:CKG88165.1"
/codon_start=1
/transl_table=11
/product="ribosomal protein L7/L12"
/protein_id="Prokka:FHGGBLIP_00028"
/translation="MAKNSHEFVGENKDIEIGANQNTIIHKDEIRNVKGNKKEMVEGH
YDINISDKMQVLSEKEMDYKSKDNILFTSNESIGFESDKNTSMVADNITTYAKTIHEL
KADSEATIQVGETIINAKPDCVIIKAGGVEVIIDSNGLVVKGELKAE"

```

ORIGIN

```

1 catcattatt atctaaaact aaaaaacttt cacataaaaa caaagctctg aaataagcaa
61 tttctgaatt gatattaata ttatcaatat cttgtaaatt taaagtcctt aatgagtatt
121 ttttagtcgc gataatactt aaactttggt ttggatttat aaaagtatct ctttcttggt
181 ttaattgaaa gcttagatct tcatttaagg atttaaataa agaattaata acctcatttt
241 tgattttatt atcttctttg taaaatttta acgcaagttg atatttttgt tcttcttgat
301 caatgatttg atcttgttct tttaaatcct gtatgttttt tagatactct ttattcataa
361 aattatagga attagaagct atacttgttt tagctataag ttcttttttt cttactaggg
421 caaatttgta ttctttggaa tagctagggt aggggtgtgg ggtgaagagg gataaacat
481 ttgtaagatt ttgaaaatta tcctgttgta atatttgaca ttcttctgga ctattgcaa
541 tttgcttaaa atttcttggt gcaaaaatct tccatatata gaattaagaa aatttgttat
601 tatgcgagaa gctgtacat taaaaataaa ttctaataat gcatctaaaa cattatcata
661 gatatcgaaa gctttattgg ttgcattctc gattgcgaca ggaatatcat ttgctgtaat
721 aattgtaatt acagcaactt ctacttgacc agttcttatg ccacctaca tacctactgc
781 aataattgga ccgctaacta aattacttgt aaaatgaact acagcttttc taaaattcct
841 agtcttatga tatacttctt ctgattctat aaaatttggt actaaatcca gatggctaag
901 tgatttttta atatatctat taacagcttc tcctagaata tcttcgtttt ctaacaattc
961 ttgtagtggt atgacataag tcaatgattc tcttaattcg cttagtttag ccatttggtt
1021 tactccattc tgaagcattg cttatttgct aaaaaatgga ctcttgctgc atagtaagct
1081 tttgaaaaga aatattcttc ttttttcaa tttttatcgt attcatcatc ataaaaagca
1141 aagtaaatta cttcataaag attattataa aaatttttat tattaataag attaagagtg
1201 caattttcgc tttgagagtc tataatttta aaaacataat ttatcttttc tataaacat
1261 tgcattttac tttttacatc tataatttta caagagttag cttttttcaa gagctcttcg
1321 ctatcttctt ttaaaatttt ttccatata tctcccaat ctttttctat ggttgcaact
1381 cctgcaatgt attcagggtt tccaaaatta agtcttgatt ttaaaggata ttctgtggcc
1441 attttttcaa ataaatcttt taagcttggg ttttgggaaa gaaaaacttc tttgcttttg
1501 gtattgctta tataatcagg gatgcttca gaatcttta ttacaatttg tataattgga
1561 gatagctcct tttctttttt aggtagaata aatttatcaa caaaagaaaa agaactcaca
1621 ataaggacaa gaataaaaaa agcttttata ggggtgtata aaataaaaaa ataaatttg
1681 taaaataaat tcataattac tccttaattt ataataattt ctttaaaact taaattattt
1741 tccgcatgca tttaatcttc ctttggcaat atttatgaaa taattaagtt cttttgttac
1801 atatatcgct tcgtataatt cttgatcttg aaattttaa tccacatcat gaaataaatt

```

```

1861 cattttttca taagaattaa tcatattctc taataattgt tctttttgag gtatagagca
1921 aataaaatth ttatctaaag taaatccaaa aaacaaagta ttataattca taaaattaat
1981 ttcaaacatt attttaccta aattatattt gggcggtaat ttttcaatth cattcataaa
2041 gataagcaac tcatccacga catttaaata attattaatt tcctctaaat cggattattt
2101 ggaaataaaa taaaataaat caagattatt ttgcatttgt aagccaaata atacatcctt
2161 atttttaaga gccactaaat aagcattatc caagcctaaa atttgcataa atttaaaatc
2221 ttttttgaaa tagtgcatat agtttaacaa ttctttttga tttgttttta attccttgatt
2281 taagttttgt tcttttaaaa cttttttaaa ttcttctttg ttgttccaaa gtaatttgga
2341 tacatcttta gcattttgat attccttttc atgataatac ttattccaaa aaataagctc
2401 taaagggcgt tgtaaaaaat gataagttaa gcttatgaaa ataatacaaaa ctacaagcac
2461 accacaaggt atataaaatc ttttaagttt gtaaaaaggt ttattcattg cttatccttt
2521 actctgcttt aagctctcca cttttaacca caagtccatt agagtctata attacttcta
2581 ctccacctgc tttaatgata acacaatcag gttttgcatt aataattggt tctcctacct
2641 gtatagtctc ttcgctatcg gcttttaact catgaatagt ttttgcgtaa gttgtgatat
2701 tatcagctac catgcttgta tttttatcac tttcaaatcc tatggattca ttacttgtaa
2761 aaagaatatt gtctttgctt ttataatcca tctctttctc gcttaatact tgcattttat
2821 cgctgatatt aatatcataa tgcccctcaa ccatttcctt tttattttcc ttcacatttc
2881 ttatctcatc tttatggata atagtatttt gatttgcacc tatttctatg tctttgtttt
2941 ctctacaaa ctcatgagag tttttagcca ctcttacttt at

```

//

LOCUS FHGGBLIP\_5 2702 bp DNA linear 12-APR-2021

DEFINITION Campylobacter species strain strain.

ACCESSION

VERSION

KEYWORDS .

SOURCE Campylobacter species

ORGANISM Campylobacter species  
Unclassified.

COMMENT Annotated using prokka 1.14.6 from  
<https://github.com/tseemann/prokka>.

FEATURES Location/Qualifiers  
source 1..2702  
/organism="Campylobacter species"  
/mol\_type="genomic DNA"  
/strain="strain"

ORIGIN

```

1 tccatggata cattctaggt tttgattttc taaaagagcg tgaagtttgg ctatgctttg
61 ttttttatct acttgtgtgg ttttttgagt tttaaaagtg tttgaaatta aatcctttgta
121 ttctaagttt tgtttgctta agcattctaa tttgatattt aaagaattht ctataataga
181 ataattaagc aaacaaagtt catcatttht ataaaagata ctaagtttht ctaaaccact
241 gctttcatct ttaggagaaa aataataact gggatatatc tgttttataa gattatcttg
301 atctaattct ccaaagtaaa aaggattatt agaaagttca tttgagcctg taaggagggt
361 ggagtttagg aagatataag cttggtagct ttggagttct tcaaaagtaa cacctacttt
421 actagccact ctttcataaa gctcatcaca atcaatcaaa tccttacaat tagcaaaaat
481 aaaaacttct tcttttgata aattaacaaa tatagtcgaa cttgaagaat taaatthtac
541 ttttgthtta atgggttggt ttttattaag ataataactt gtgcaattat tttcataaat
601 caaattaatc atttgcttht ttctagcttg aaaaaaatct aatcatttht ttaactaag
661 acatttaagc cagttggaat tataatthta gacttcccct atattatctt ctgtaagtat
721 tttttgatta tttttatctt taacaataaa aggcaaccac ttataaactg cttcagcatg
781 atctaaatct tgcttgaagt cattattaga tagttthtct aatatagatt tatcaagtat
841 ttttatataa atttgcatag cttccaaaac caaaaaagaa tcaggaataa caaatttht
901 gacattthta tattcactta cataaaacaa ctcttgcata tctthataaa taagattaaa
961 ttctthcttg ttatatatgc taththttaca caagctatca aaaatthtat ccaatactat
1021 actaatataa ttttgattct catcttggtat atctacttht tctthctgata aaagcttht

```

```

1081 tttctcactt aagtcgatta aatthttgtgt ataagaatth agataatcca tagcacaagc
1141 aacatcccct ttaaattcct tgataththt attaththth accaaatgct cataaaaata
1201 actcgcccaa actatattat acataaaatg actagttagc aaatagctth tttcaagctc
1261 tcctatatga attaaatgca acttgtctgt atththtataa tcaaacttat cthtaatatc
1321 taatccatat ttataaccca aatcagctat cgcagatctt gaggactcta gtgcttgtct
1381 atattctcgt gaaaaatcct cthtattagg gataggthta gctatagtht ctatatgatg
1441 taththctata cthgtthttac cthtacttgc thgtththata thtaaaagcac atthcatcaag
1501 tctthththga tctaththgtc cthgtgaatt thtacattct tcgatcaagc catcggtthc
1561 atththctata thtaaaactt tagagcaatt atctaaagth ththctagtca taccaaagcc
1621 aaaaagthth thaatthcct taatgagtaa thtaaaaaca accctaacag ctctaataaa
1681 aataththata aaacttgcta cagcacctc tataaccagc ccattataag tataaaagtht
1741 thgaatatat ththththgcc caaagataca aaaacattga gccaaatgth ccctaaaga
1801 atgccccaca acatctatht taaaatcatc gthcccatgc ththctctaa tgathththaa
1861 aactthcatca ctataathaa ccaaagacac cacttgtgga atthcaaagc caaagctat
1921 acaacctct gtaaaaaatg catctththaa tatctgtgtt ccactgtht cagtgccagc
1981 aaaagccaag atataagtht tatcaththt acttgtatct thtaaaaacag tatgagaata
2041 accactaatg ctagtathth thacatgath tataactthca taacgagata caaagththt
2101 agtgcgtggg ctaagatgath gthctthaaatt thctaggath thcattgtgct tagcaaaatt
2161 caaagccagth agathththt gatctththg thctththgt thctththth tataaataaa
2221 gctththgath thaththcaa thacttgath thcatctaaa gctthcattg thththctagg
2281 ththththaaag athaagathcag cagaaaatct agcctctata atggtagath aagccgtagg
2341 atctctath thcgctthth ththththaaat thagctthth gaagathcat ththgaatag
2401 ththctthct atctcatacc cthactthth thcatctgca thaaagccaca aaggaggagth
2461 aaaagcacta thcaaaaaaac cthththcatc atthctcatg athaaatcaa gcattgcata
2521 actagathct gctatathth catagthctth gaththgagath athaagthct thagathcat
2581 cagthactth gthctgtata thththcatca cthththataa atthaccath ggthaaataa
2641 tgaaaagath thccgctgth actththacga cthaatgctth aaaaagctaaa thctctthct
2701 th

```

//

```

LOCUS      FHGGBLIP_6                2651 bp    DNA        linear      12-APR-2021
DEFINITION Campylobacter species strain strain.
ACCESSION
VERSION
KEYWORDS   .
SOURCE     Campylobacter species
  ORGANISM Campylobacter species
            Unclassified.
COMMENT    Annotated using prokka 1.14.6 from
            https://github.com/tseemann/prokka.
FEATURES   Location/Qualifiers
  source    1..2651
            /organism="Campylobacter species"
            /mol_type="genomic DNA"
            /strain="strain"
  gene      complement(294..668)
            /locus_tag="FHGGBLIP_00029"
  CDS       complement(294..668)
            /locus_tag="FHGGBLIP_00029"
            /inference="ab initio prediction:Prodigal:002006"
            /inference="similar to AA sequence:RefSeq:CKG86895.1"
            /codon_start=1
            /transl_table=11
            /product="methyltransferase small"
            /protein_id="Prokka:FHGGBLIP_00029"

```

```

/translation="MTNMEQINNLKDYTEFVQASYFNFVYTEGQKALGFKISKTRFFK
DKSELEKLDYFKALHDEYNGYLVIDDSFFYAKLNRDLENYKLEIFLKMRLNFIPTL
QVALALLCLMKRQRKLRGINKY"
gene      complement(687..1049)
          /locus_tag="FHGGBLIP_00030"
CDS      complement(687..1049)
          /locus_tag="FHGGBLIP_00030"
          /inference="ab initio prediction:Prodigal:002006"
          /codon_start=1
          /transl_table=11
          /product="hypothetical protein"
          /protein_id="Prokka:FHGGBLIP_00030"
          /translation="MCKLNELPNNEEKYNKILGYFDKKGIDDFRHLKKYSRIEMWL
CIYYDDTYKTPSNFQEKIEMDNIALKTKNQMSLHKIVDMHISPYWNRTRYILEGNEG
NMNFEFIEDELACGNLYQ"
gene      complement(1441..1641)
          /locus_tag="FHGGBLIP_00031"
CDS      complement(1441..1641)
          /locus_tag="FHGGBLIP_00031"
          /inference="ab initio prediction:Prodigal:002006"
          /codon_start=1
          /transl_table=11
          /product="hypothetical protein"
          /protein_id="Prokka:FHGGBLIP_00031"
          /translation="MQTKLYFICNYLSIIYFLNYLVTLFVRNYPKKAIDSYILFL
YKLLKYDYIVFYKDSYITKKT"
gene      complement(1687..2055)
          /locus_tag="FHGGBLIP_00032"
CDS      complement(1687..2055)
          /locus_tag="FHGGBLIP_00032"
          /inference="ab initio prediction:Prodigal:002006"
          /inference="similar to AA sequence:RefSeq:ASI87259.1"
          /codon_start=1
          /transl_table=11
          /product="Hypothetical protein"
          /protein_id="Prokka:FHGGBLIP_00032"
          /translation="MIKAYFENNAINVKAFARAHNDVFDKYITKILKSLTKQGSNIDY
VKAICISSKKQEFTGSLTGDKYSINPMTWKEIISTRKKDLENHIKDVKSNLSSLSKYKD
IHNFKKEIKKERVGNLKKI"

```

ORIGIN

```

1 aataagcttt attgtaaatt attactttat tatctatatac tttacacaag ctcctaaact
61 cataatatcg cggatccata tatttataag aacatcctcc tgctaagaat aataaaagat
121 atacaggtaa aagaaacaaa gtaaattttt taaatattgt tttaaaattt atagtttttg
181 ttttattttt tatttttaaa aagactttta agataaaata taagataata gaaaatataa
241 aaacaaaaaa aagaaaaata taagaataaa tattaaaaga ttaataaaga attctagtat
301 ttattaattc ctcttaattt tctctgtctt ttcataagac aaagcagtgc taaagccact
361 tgtagtgttg gactgatgaa atttaatctc atatctttga gaaaaatttc tagcttgtaa
421 ttctctaaat ctctatttag tttcgcataa aaaaaagaat catctataac caaatatcca
481 ttatattcat catgtaatgc tttaaaatag tccaattttt ctaattcact cttatcttta
541 aaaaatctag ttttagatat tttaaatcct aaagcttttt gtccttcagt ataaacaaaa
601 ttaaaataac tagcttgcac aaattctgta taatctttta aattgttgat ttgttcata
661 ttagtcatta tttattcctt atattattat tgataaagat tgccacaagc aagctcatcc
721 tctataaact caaaattcat attaccctca ttgccttcta atatatacct tctagtattc
781 caatatgggc ttatatgcat atcaacaatc ttgtgtaaag acatttgcac attttttght

```

```

841 tttagtgcaa tattatccat ctctatcttt tcttgaaaat ttgaaggagt tttgtaagta
901 tcatcgtaat atatacaaag ccacatttct atcctactat attttttag atgtcgaaaa
961 tcatctatgt cacctaactt tttatcaaaa taccctagaa tcttattata tttctcttcg
1021 ttattaggaa gttcatttaa cttacacata ttcctaaatt gccataaatt aggctctaaa
1081 taataagaat aaggagtata ataaaagata attaagccta tacttccaag aaagactaaa
1141 aactttgaaa cgcttttttt agatttgtaa ggggtatfff aaaaagaata tgtaactatc
1201 cctaaataat tttagcaaaa ctcccaata ataggatfff aaagcctgca aaaatgactt
1261 tttatctttc ctaatttaaa gtgtaaaaaa tcccaaatat cccaaaatgt ctgttttattc
1321 cctaaaaagt aattaaatat tgtttaaaac gcaattaaaa gcgatatttg attttaaatt
1381 tttatatccc aaaaatgttt ttgatcctat aagatagtta ctttttact taaagtattc
1441 ttatgttttc ttagttatgt aactatcctt ataaaacact atataatcat attttaacaa
1501 ctttttatac aaaaataata tgtaactatc tatagcttta agttttggag gatagttacg
1561 cacaaagcct aatgttacta aataatttaa aaaataaata atagacaggt agttgcaaat
1621 aaaatatagt tttgtttgca taattatcgt attggaaatt ttttattata caaaatattc
1681 aaatttttat atttttttta aattgccaac cttttcttt ttttttctt tttctttaa
1741 attgtgaata tctttatatt ttgatagaga taaattactt ttaacatctt ttatgtgggt
1801 ttctaagtct tttttcttg tactaattat ttctttcaa gtcattggat ttatgctata
1861 tttatctcca gtttagcttc ctgtaaattc ttgcttttt gatgaaatgc atatagcctt
1921 cacataatca atattacttc cttgctttgt taatgattta agaattttag tgatatattt
1981 atcaaacaca tcgttgtgag ccctagcaaa agcttttaca ttaatagcat tgttttcaaa
2041 atatgcttta atcatttttt ctcctttaat acttcaattt taattgaagt ttatctttaa
2101 ttgtgataat atttcaatta aaattgaagt attatactat taaaagttag tataagtcaa
2161 gtaaaaaact aattttttat agtatttttg ttaaggttac gattatatgg aagtcttaga
2221 tatattgcaa aaaatgtttg aagctgtagg ggtaaaaaat aaaaatcagt tggcaaaaata
2281 tttaaaaata gagaatagcc ttatagctgg ttgggagaaa agaggaaaaa ttcccgaaaa
2341 gtatgtgtat aaaatttctc aagatagtaa tttgccatat gaatatttta tcaacaatac
2401 taataaaaaat gagtataata ataacaataa taagcgagat gttaatffff attcaatacc
2461 aaaacttaat gtttcggttt ctgctggtag tggcaatgag ttaattgggc ttgaagaata
2521 tgaacagga gaaatgcttg aacttagcaa agcgtttttt aaaacaacac ctaaaaatgt
2581 aaaagcgatt aaagttgat gttattctat gttccaatg cttttgcctg atagttgggt
2641 tgtctttgag g

```

//

```

LOCUS      FHGGBLIP_7                2243 bp    DNA        linear      12-APR-2021
DEFINITION Campylobacter species strain strain.
ACCESSION
VERSION
KEYWORDS   .
SOURCE     Campylobacter species
  ORGANISM Campylobacter species
            Unclassified.
COMMENT    Annotated using prokka 1.14.6 from
            https://github.com/tseemann/prokka.
FEATURES   Location/Qualifiers
  source   1..2243
            /organism="Campylobacter species"
            /mol_type="genomic DNA"
            /strain="strain"
  gene     21..785
            /gene="trxB_2"
            /locus_tag="FHGGBLIP_00033"
  CDS      21..785
            /gene="trxB_2"
            /locus_tag="FHGGBLIP_00033"
            /inference="ab initio prediction:Prodigal:002006"

```

```

/inference="similar to AA sequence:RefSeq:CKG86288.1"
/codon_start=1
/transl_table=11
/product="thioredoxin reductase"
/protein_id="Prokka:FHGGBLIP_00033"
/translation="MAAGILGDYKYLANDMSQNGFNARFIQATILYIQLSGSSILDK
PNLLGAIYGYADIAVGSGLVGVHKNPLREQQIKTLAKTLKPDEFGMLPFIDEIMGVDW
VIDLNKYDIASDQFGSMYKALRSDVVEGKIKDPRDIDSTYESRREFDRHRGGYKNGML
QGYGTDTPNDWSEERAQLFNDTLILHAKLAALTPPQGYPNAPYYFTPENLEWYYKRHK
LDKLLDPRIPAIYRYNFPRELRAKILKFGEENGIKE"
gene      866..2158
          /gene="trxB_3"
          /locus_tag="FHGGBLIP_00034"
CDS       866..2158
          /gene="trxB_3"
          /locus_tag="FHGGBLIP_00034"
          /inference="ab initio prediction:Prodigal:002006"
          /inference="similar to AA sequence:RefSeq:CKG86288.1"
          /codon_start=1
          /transl_table=11
          /product="thioredoxin reductase"
          /protein_id="Prokka:FHGGBLIP_00034"
          /translation="MSETYEIYTPEGFILNVDKQSGKILFSESKSKKPTGKYTQEYSK
ALFEADRILRTSPYINYQPRYLDPEFHTGQKSTLLEFKDWQSIYLLKDPVKGSIAPWTK
AEKAYYKSLKTKKERYKYL VIRSGIRSVVIDIPYEAIGAVDEKGNVDPKYEELYRTVD
DNKHNLRSSLFHNEWGMAAGILGDYKYLANDMSQNGFNARFIQATILYIQLSGSSIL
DKPNLLGAIYGYADIAVGSGLVGVHKNPLREQQIKTLAKTLKPDEFGMLPFIDEIMGV
DWVIDLNKYRLANDQFGNIYKALRSDVVEGKIKDPRDIDSTYESRREFDRYRVGYRKG
MAQGYGTDTPNDWSEEEAQLFNDTLILHAKLAALTPPQGYPNAPYYFTPENLEWYYKR
HKLDKLLDPRIPAIYRYNFPRELRAKILAYAKEHNIKD"

```

ORIGIN

```

1  tatttcataa tgaatggggt atggcagcag gaatactggg tgattataaa tatctagcta
61  acgatatgtc tcaaaatggt tttaatgcaa gatttatcca agcaactata ctttatatac
121 aattaagtgg aggaagtagt atactagata aacctaattt attgggtgct atttatggtt
181 atgcagatat tgcagtagga agtggtttag taggagtgca taaaaatcct ttaagagaac
241 aacaaattaa aaccttagct aagactttaa aacctgatga atttggtagt cttcctttta
301 tagatgagat tatgggagta gattgggtga ttgatttaaa taaatatgat atagctagtg
361 atcaatttgg aagtatgtat aaagccttaa gaagtgatgt ggttgagggt aagataaaag
421 atccaagggg tatagattct acttatgaaa gcagaaggga atttgatcgc catagagggtg
481 gatataaaaa tggcatgctg caaggctatg gaaccgatac acctaataatg tggagtgaag
541 aaagggcaca actttttaat gatactttaa tacttcatgc caaactcgca gccctcactc
601 ctctcaagg ctatcctaag gcaccttatt attttacctc tgaaaaccta gaatggtatt
661 ataaaagaca taagcttgat aaactccttg atccaagaat ccctgctatt tatagatata
721 atttccaag ggaacttaga gctaagatac tcaaatttgg cgaagaaaat ggcattaaag
781 aataaagtaa ttacctaggc agattagcca ctactataat catggaagat ggtttatata
841 tgggataaat taagaaagga taaaaatgag tgaacttat gaaatttata caccgaagg
901 ttttatatta aatgtagata aacaaagcgg aaaaatacta ttttcagagt caaagtcaaa
961 aaaacctaca ggcaaataca cccaagaata ttctaaagct ttgtttgaag ctgatagaat
1021 ttttaagaacc tctccttata ttaattatca acctaggtat ctagatcctg aatttcacac
1081 agggcaaaaa tccactttgc ttgaatttaa agattggcaa agtatatatt taaaagatcc
1141 tgttaaagga agcatagctc cttggactaa agcagaaaaa gcttattata aatctttaaa
1201 aactaaaaaa gaaagatata aatatttagt tataagaagt ggtataagaa gtgttgttat
1261 agatatacct tatgaagcca taggagctgt agatgaaaaa ggaaatgtag atcctaagta
1321 tgaagaatta tatagaacag tagatgataa taaacataat ctaagatcaa gtttatttca

```



```

1381 taatgaatgg ggtatggcag caggaatact gggtgattat aaatatctag ctaacgatat
1441 gtctcaaaat ggttttaatg caagatttat ccaagcaact atactttata tacaattaag
1501 cggaggaagt agtatactag ataaacctaa tttattgggt gctatztatg gttatgcaga
1561 tattgcagta ggaagtgggt tagtaggagt gcataaaaat ctttaagag agcaacaaat
1621 taaaacctta gctaagactt taaaacctga tgaatttggt atgcttcctt ttatagatga
1681 gattatggga gtagattggg tgattgattt aaataaatat agattggcta atgatcaatt
1741 tggaaatata tataaagcct taagaagtga tgtagttgag ggtaagataa aagatccaag
1801 ggatatagat tctacttatg aaagcagaag ggagtttgat cgttatagag ttggatatag
1861 aaagggtatg gcgcaaggct atggaaccga tacaccaat gattggagcg aagaagaagc
1921 acaacttttt aatgatactt taataacttca tgccaaactc gcagccctca ctctccaca
1981 aggctatcct aatgcacctt attattttac ccctgaaaac ctagaatggt attataaaag
2041 acataagcct gataaactcc ttgatccaag aatccctgct atttatagat ataatttccc
2101 aagggactt agagctaaga tactagctta tgctaaagaa cataatatca aagattaaac
2161 cacaaaagaa aggaaaaaca aatgcaaaaa acatttcaaa tcgatttaga aaaaagaaaa
2221 gctttagaga attttaaaaa tct

```

//

LOCUS FHGGBLIP\_8 2165 bp DNA linear 12-APR-2021

DEFINITION Campylobacter species strain strain.

ACCESSION

VERSION

KEYWORDS .

SOURCE Campylobacter species

ORGANISM Campylobacter species  
Unclassified.

COMMENT Annotated using prokka 1.14.6 from  
<https://github.com/tseemann/prokka>.

FEATURES

Location/Qualifiers

source

1..2165

/organism="Campylobacter species"

/mol\_type="genomic DNA"

/strain="strain"

gene

117..566

/locus\_tag="FHGGBLIP\_00035"

CDS

117..566

/locus\_tag="FHGGBLIP\_00035"

/inference="ab initio prediction:Prodigal:002006"

/codon\_start=1

/transl\_table=11

/product="hypothetical protein"

/protein\_id="Prokka:FHGGBLIP\_00035"

/translation="MVGGGWFPYSLQPSYHEFKEMCKLNLNPNDEHKYNKILSYFGL

NLDTLDWENIKKNSTLLTQGYLEYNSQNDRYMYRYENKSDPRIRKVFLLFFNDSIKLS

NLYKIDFEVFWNDKRDYIHTKVTSYDVTVEENFRTCGYFSGYLKGIK"

gene

566..931

/locus\_tag="FHGGBLIP\_00036"

CDS

566..931

/locus\_tag="FHGGBLIP\_00036"

/inference="ab initio prediction:Prodigal:002006"

/inference="similar to AA sequence:RefSeq:AVS37480.1"

/note="DUF2974 domain-containing protein"

/codon\_start=1

/transl\_table=11

/product="hypothetical protein"

/protein\_id="Prokka:FHGGBLIP\_00036"

```

/translation="MHHKQIQNFRDNAELAWASYGYFHFIFGKNYNLRNKDKEKLDSE
IKDNNRMPTYTDILNMEYNSLFDGEFSPLQAKQFFERYDLLKHCPTNSGFSATLFQN
KETKEYTLAIRGTEPKEVK"
gene      931..1419
          /locus_tag="FHGGBLIP_00037"
CDS       931..1419
          /locus_tag="FHGGBLIP_00037"
          /inference="ab initio prediction:Prodigal:002006"
          /codon_start=1
          /transl_table=11
          /product="hypothetical protein"
          /protein_id="Prokka:FHGGBLIP_00037"
          /translation="MKKFLTPKKIILAFIALFGIYLLGIPLYTPYELQPSYWKFKKI
CEATFQLHNQHIHTQRIKPLMQIFNVDNQKIKKYAKLENNTYISRIPIPHFLMRIEN
AQLNIYSDLNWNIIKIDTGDLVWYNWRPMILGNEGNMDLRVKWNNFLMCGNLDKRIEY
EQ"

```

ORIGIN

```

1  acttgcttat aataatatag aatctaaaga gaggtcataa atgataaggc ttaaaaagat
61  tctaaaaata tcaagtttta ttctacttcc tttgataatt atatggagta tgacatttgg
121 ttggggggggg gtggtttgtg ccttatagcc tacaaccgag ttatcacgaa tttaaagaga
181 tgtgtaagct taatgaactt ccaaatgatg aacacaaata taataagatt ctaagttatt
241 ttggattaaa tttggataca ttggattggg aaaatattaa aaaaaattca acattattaa
301 cacaaggtta tttagaatat aattcacaaa atgatagata tatgtatcga tatgaaaata
361 aaagtgatcc agaataaga aaagtttttt tcttattttt taatgacagt ataaagctaa
421 gcaatcttta taaaatagat tttgaagtat tttggaatga taaaagagat tatattcata
481 caaaagtaac ttcttatgat actgtaatag aagagaactt tagaacttgt ggatatttta
541 gtggatacct gaaaggaatc aaataatgca ccataaacag caaatacaaa attttagaga
601 taacgcagaa ttagcttggg caagttatgg ttatttttcat tttataggta aaaactataa
661 tttacgaaat aaagacaagg aaaaattaga tagttttatt aaagataaca atagaatgcc
721 tacctatacc gacatttctca atatggaata taattcctta tttgatggcg aatttctccc
781 actccaagcc aaacaattct ttgaaagata tgatttatta aaacattgtc ctaatacaaa
841 ttcagggtttt tctgctactc tctttcaaaa caaagaaact aaggaatata ctttagctat
901 taggggaaca gagcctaagg aagtcaata atgaaaaagt ttctgacacc taaaaagatt
961 atcttagctt ttattgcatt atttggaatt tatctacttg gaatccact ttattatact
1021 ccttatgaat tacaaccaag ttattggaag ttttaagaaaa tatgcgaggc tacatttcaa
1081 cttcataatc aacatataga gcatacacia agaataaaac ccttaatgca aatttttaat
1141 gtagataacc aaaaaattaa aaagtatgct aagttggaga ataataccta tatctctcgt
1201 atcccatatc cacatttttt gatgcgaata gaaaatgctc agttaaatat ttatagtgat
1261 ttaaattgga atattatcaa aattgatacg ggggatttag tatggtataa ttggagacc
1321 atgatattag gtaatgaggg caatatggat ttaagggtta aatggaataa ttttttaatg
1381 tgtggaaatt tggataaaag gatagagtat gagcaataaa gagcagatta gaaagcttcg
1441 tgataattca gaactagctt gggcatcgta tggatatttc cactattttt tagaacagca
1501 aaaaaagtct tacgctgttt ggctacaaga tgaatcaggc aaaaatagac tagatgaaaa
1561 taaaaaagca atcacaaaat ccattgattt aaacgatgta ttagatattg aatataaagg
1621 gcttgaagtt attaaactag atatatgttg aaaccagaa aaaattgaca ctctcaaagg
1681 cgacttctcc ccactccaaa ctaaacaatt cttttctcgc tatgatttat taaaacattg
1741 tcctaataca aattcagggt tttctgctac tttatttggg gaaaaaagaa aacaaattaa
1801 tagtaaaaca aaagaagaaa gctataccag tgaatatggc tatatcaatt atatttttagc
1861 tattagagga acagaaatga gttcttttaa agatttgctt gtagctgatg cttcttttagc
1921 cataggctct atacctaaag cccaatatga tgatatgata aacttttatg aaacttgtat
1981 taaagattat ccacaaatca aagaaaaaga ctctcttacc attacaggac actcattggg
2041 aggctgtctt gcacaactct ttgctttaag tatctgtgat gataagaata gaaataatat
2101 caaagcttta tatacttata atgcacctgg agctagaaag ataatacctc cttatgatta
2161 tatag

```

```

//
LOCUS      FHGGBLIP_9                1815 bp    DNA        linear        12-APR-2021
DEFINITION Campylobacter species strain strain.
ACCESSION
VERSION
KEYWORDS   .
SOURCE     Campylobacter species
  ORGANISM Campylobacter species
            Unclassified.
COMMENT    Annotated using prokka 1.14.6 from
            https://github.com/tseemann/prokka.
FEATURES   Location/Qualifiers
  source   1..1815
            /organism="Campylobacter species"
            /mol_type="genomic DNA"
            /strain="strain"
  gene     82..882
            /locus_tag="FHGGBLIP_00038"
  CDS      82..882
            /locus_tag="FHGGBLIP_00038"
            /inference="ab initio prediction:Prodigal:002006"
            /inference="similar to AA sequence:RefSeq:CKG87105.1"
            /note="Uncharacterized protein conserved in bacteria"
            /codon_start=1
            /transl_table=11
            /product="hypothetical protein"
            /protein_id="Prokka:FHGGBLIP_00038"
            /translation="MSIKKLPSDLERYYNQLSDHSWNFIENHGISLFNTAWINEVYNP
            FINDIAPFYPFNEESTANLSMDSFKTFFGRNGVLNSFYKLYLNNVLVKKRKNYSINSQ
            FASKLNFSEKFLDFITNAGNLSSLILNANDNIRVNFITIQSLDLSADFSFVKLGYNKNI
            IQYDHTLDQTLQIVAEEFNNGTSLNFTAYNYSNPNLNYTKSYKGEAWYKFIKDNKNN
            STYSIMFNKLNLYDFEIIINGASDLNNIVYILNLLKIVENITGVNKQ"
  gene     879..1778
            /locus_tag="FHGGBLIP_00039"
  CDS      879..1778
            /locus_tag="FHGGBLIP_00039"
            /inference="ab initio prediction:Prodigal:002006"
            /inference="similar to AA sequence:RefSeq:CKG87069.1"
            /note="Uncharacterized conserved protein%2C contains FHA
            domain"
            /codon_start=1
            /transl_table=11
            /product="hypothetical protein"
            /protein_id="Prokka:FHGGBLIP_00039"
            /translation="MIEKEELGITIENYDECISGSKAFVFDTKGGTIGSGDDCTFRIQ
            DKLEQIKNTHAIVSYEEGSFTIAAFEDSDIYYNKSF SRMPSGYEIIISIGDIFKIGNL
            EFRFVDAKSIEESIKENKKYLEDIEKRNFDEIEIEPRGKTSINFDKNEELKEILKNN
            NYKFIEEEKADDSFLKEIIQRDPNSLGYENILKSLVKNLKDIKTKQSSKLNNNYSPI
            SIKDFESIINNIPLIKSTRLINILALSIAKELYTPIFEEMEENMFIKYLEAAIQNNI
            KEDKILFENLTLKALEKYIKDFE"
ORIGIN
  1 aataaccaa gcgccgaaga aaaaatttca tatgctcttg gtggcaataa agatgccaat
  61 gatcctttg ctgtatttca aatgagtata aaaaaattac ctagtgattt agaaagggtat
  121 tataatcagc tttctgatca ttcttggaaat tttatagaaa atcatggtat ttctttattt

```

```

181 aatactgctt ggattaatga agtgtataat ccatttatca atgatattgc gccattttat
241 ccttttaatg aagaaagcac agctaactcg agtatggata gctttaaaac attttttggg
301 agaaatggag tattaatag tttttataaa aaatacttga acaatgtttt agtaaaaaga
361 aaaaataact attctatcaa ttctcaatth gcttcaaaat taaattttct taaagaatth
421 ttagatttta tcaccaatgc aggtaatctc tcaagcctca tactgaatgc taatgataat
481 ataagagtta attttactat tcaaagcctt gatttaagtg cagatttttc ctttgtaaag
541 cttggctaca acaataaaat tattcaatac gatcactctc ttgatcaaac cctacaaatt
601 gtagcagaag aatttaataa tggaacaagt ttaaatttta cagcctacaa ctactccaat
661 cctaatttaa attatacaaa atcatataag ggagaatggg catggtataa gtttataaaa
721 gataataaaa acaattctac atacagcatt atgtttaata ataataaaaa cttatatttt
781 gactttgaaa ttattaacgg tgctagtgat taaataata tagttttatat tttaaataat
841 cttaaaatag tagaaaatat cacaggagta aataaacaat gatagaaaaa gaagaattag
901 gaattactat tgagaattat gacgaatgca ttagtggttc taaagcattt gtatttgata
961 caaagggtgg aactatagga agtggtgatg attgcacttt tcgtattcaa gataaactag
1021 agcaaatcaa aaatacccat gccatagtat cttatgaaga aggatctttt acaattgcag
1081 cttttgaaga ttctgacatt tattataaca agtccttttc tagaatgcca agtggctatg
1141 aaataataat cagcataggc gatattttta aaatcggtaa tttagaatth agattttgtgg
1201 atgcaaaaag cattgaagaa agtatcaaag aaaataaaaa atacttagaa gatattgaaa
1261 aacgcaatca ttttgatgaa attgaaattg aacctagagg aaaaacaagt ataaattttg
1321 acaaaaacga agagttgaaa gagattttta aaaataataa ttataagttt attgaggaag
1381 aaaaggcaga tgatagcttt ttaaaagaaa tcattcaaag agatccaaat tcattaggtt
1441 atgaaaatat tctaaaaagt ttggtaaaaa atttaaaaga tattaaaaca aaacaacaaa
1501 gctctaaatt aaataataat tattctccta tcagtattaa agattttgaa agtattatta
1561 ataataatcc tttaatcaaa tccacaagat tgattaatat tttagccctt agcctaatcg
1621 caaagaatt atactctcc atctttgaag aaatggaaga aaatatgttt attaaatctc
1681 ttgaagctgc catacaaac aatatcaaag aagataagat tctttttgag aatcttacc
1741 taaaagcatt ggaaaagtat attaaagatt ttgagtgatt ttttaactct taatgccatt
1801 ttcttcagca aattt

```

//

LOCUS FHGGBLIP\_10 1455 bp DNA linear 12-APR-2021

DEFINITION Campylobacter species strain strain.

ACCESSION

VERSION

KEYWORDS .

SOURCE Campylobacter species

ORGANISM Campylobacter species  
Unclassified.

COMMENT Annotated using prokka 1.14.6 from  
<https://github.com/tseemann/prokka>.

FEATURES Location/Qualifiers

source 1..1455  
/organism="Campylobacter species"  
/mol\_type="genomic DNA"  
/strain="strain"

gene 144..695  
/gene="trxB\_4"  
/locus\_tag="FHGGBLIP\_00040"

CDS 144..695  
/gene="trxB\_4"  
/locus\_tag="FHGGBLIP\_00040"  
/inference="ab initio prediction:Prodigal:002006"  
/inference="similar to AA sequence:RefSeq:CKG87041.1"  
/codon\_start=1  
/transl\_table=11

```
/product="thioredoxin reductase"  
/protein_id="Prokka:FHGGBLIP_00040"  
/translation="MIYDLHDHYYESLLDEFGLPFLDEIIGADWTIDLNRYKFALDE  
EGRIIWALYDDIEKGLKLDPRVDSTPESRKEFDHYMDGYKNGMVTRFDVDIRNERDE  
RSAKLTMDTLVLSAKLAALTPPQGYPNAPRYYSERLEIIYKRHKLDKLLDPRIPAIY  
RYNFPRELRAKILKFGREENSIKD"
```

ORIGIN

```
1 taggatttaa agcaagacaa caacaagcct tatttttaca agctcaattt ggagataaaa  
61 atgcttttaa gaggtttaggt ttagcagtat tgtgttctaa ttcttttctt acagggcaac  
121 attggaacaa gcttagagca aaaatgattt acgatttaca cgatcatcat tatgagagtt  
181 tgtagatga atttggtatg ctaccttttt tagatgagat tataggagca gattggacga  
241 ttgatttaaa tcgatataaa tttgctcttg atgaagaagg tagaatcatt tgggctttat  
301 atgatgatat tgaaaaagggt aaattaaaag atccaagaga tgtggattct actcctgaaa  
361 gcaggaaaga atttgatcat tatatggatg gatataaaaa tggaatggta actagatttg  
421 atgtagatat tagaaacgaa agagatgaga gatctgctaa actgactatg gataccctag  
481 tattaagtgc caaactcgca gccctcactc ctctcaagg ttatcctaag gctccaagat  
541 actatagccc tgaagacta gaaattattt ataaaagaca taagcttgat aaactccttg  
601 atccaagaat ccctgctatt tatagatata atttccaag ggaacttaga gctaagatac  
661 tcaaatttgg cgaagaaat agcattaaag attaaagtaa cttcataggc agactagcca  
721 ctactataat catagaagat ggtttataca tgggataaat ttaagaaagg ataaaaatga  
781 gtgaaactta taaaatttat acacccaatg gattagcatt agatgtggaa aaagatacca  
841 ataaaatact atttaaagaa aatattaaac ccacaggcaa ttataccgaa gaatattcca  
901 aagctttggt tgaagcacac gacattaaac gaaactcccc ctacaaagac tataaaccaa  
961 tatatctaga tcctaacttt tatacagggc aaaaatccac tctagtagaa tttaaagaat  
1021 ggcaaagcat atatttataaa gatcctatca aagtagctca aaatatcaca aatatttgta  
1081 ttaattatgt aaaaaagggt tttaaagaag ttttaatcga acaacttggc attatatatt  
1141 tattaacaca tccacaaatc gaagttgaag ttaagaaata tggaaaaaaa tattttaagg  
1201 ctataaaciaa ggaaattgct gcaaaaagat tttctacaat taaagaagaa ttatttttca  
1261 ataaaacaaa aatattccttt atggcagaac aagtaaaaaa cggatttgat tatgaaatag  
1321 atcaaaagct tgaagaaat aaagaatttc ttttaaaaag acttttgtct tatttgatta  
1381 ttgatgagaa aagaagtgca actgcttttag aggatataaa agaacaaaaa tatattatag  
1441 atgattatac ttttt
```

//

LOCUS FHGGBLIP\_11 1304 bp DNA linear 12-APR-2021

DEFINITION Campylobacter species strain strain.

ACCESSION

VERSION

KEYWORDS .

SOURCE Campylobacter species

ORGANISM Campylobacter species

Unclassified.

COMMENT Annotated using prokka 1.14.6 from  
<https://github.com/tseemann/prokka>.

FEATURES Location/Qualifiers

source 1..1304

/organism="Campylobacter species"

/mol\_type="genomic DNA"

/strain="strain"

gene 119..250

/locus\_tag="FHGGBLIP\_00041"

CDS 119..250

/locus\_tag="FHGGBLIP\_00041"

/inference="ab initio prediction:Prodigal:002006"

/codon\_start=1

```

        /transl_table=11
        /product="hypothetical protein"
        /protein_id="Prokka:FHGGBLIP_00041"
        /translation="MNPQELISQIKDYANIADASYAMLDLIDENDEKGLRKYKYKN"
gene     303..947
        /locus_tag="FHGGBLIP_00042"
CDS     303..947
        /locus_tag="FHGGBLIP_00042"
        /inference="ab initio prediction:Prodigal:002006"
        /codon_start=1
        /transl_table=11
        /product="hypothetical protein"
        /protein_id="Prokka:FHGGBLIP_00042"
        /translation="MKIAMIIISLFLSFLSACAFKEKKASEIETLASNYGGIYIFDK
KIREEILELEKKREEFRSKYLGSEIKVGNETHFVNFSYLKKKFPQILSNGCNYYRSDY
RYKGKAHFGFKDKPEFAYYEDQFKAYMGEENYKLRPYLGMTTYVCEGKKYPVVFAT
MIDYKVKNYGLFGDEGRGFSFSNISRSKSAGGGSFHYFTNGKFIKSDEKYTGQSY"

```

ORIGIN

```

1 gaagaggatt tagcttttca agcattagtc gtaaaagtgc aggcgaggga tcttttcatt
61 attttacc aa tggtaaat tt ataaaaagtg atgaaaaata tacaggacaa agttactgat
121 gaatcctcaa gaacttatct ctcaaatcaa agactatgct aatatagcag atgctagtta
181 tgcaatgctt gatttaatcg atgagaatga tgaaaaaggt tttttgcat atattaaata
241 taaaaactaa atttgattta tataaggat ttgaaataat acaatttaaa aaggagtatt
301 aaatgaaaat cgcaatgata attctaagct tttttcttt agtattttta agtgcattgtg
361 cttttaaaga aaaaaagca agtgaaatag aaactcttgc aagtaattat ggtggaat tt
421 atatctttga taaaaaata agagaagaga tattggaatt agagaaaaaa agagaagaat
481 ttcgtagtaa gtatttgggt agtgaaatta aagtaggaaa tgaaactcat tttgtgaatt
541 tttcttattt gaagaaaaaa ttcccccaa tcctttctaa tggttgtaac tattatcgta
601 gtgattatag atataaaggc aaggctcatt ttggtttcaa agataaaccc gaatttgcatt
661 actatgaaga tcaatttaaa gcatatatgg gtgaagaaaa ctataaaaaa ttaagacctt
721 atttaggtat gacaacttat tatgtgtgtg agggtaaaaa atatcctgtt gtttttgcta
781 ccatgataga ttataaagta aaaaattatg gattatttgg agatgaagga agaggattta
841 gcttttcaaa cataagtcgt aaaagtgcag gcggaggatc ttttcattat tttactaatg
901 gtaaatttat aaaaagtgat gaaaaatata caggacaaag ttactgatga accctaaaga
961 acttatctct caaatcaaag actatgctaa tatagcagat gctagtattg ctatgttgca
1021 atatgtttgg gaaaatatag agcaagatga aaagaataat atttataaag cagataaacct
1081 tacttttggg gataaattaa agcaagatat tgttatgaaa aatagtaaag gggaaaatat
1141 tgtaaaacct aaaaatacaa acacagctta tacttgtgct atacaagctc gttttgaaca
1201 aaataaaata gttaaaatag aacctaaata ttgtatttct cttataaata cttgttttga
1261 tagtaaagaa ataacattgg ataattgat tagtagggta ggat

```

//

```

LOCUS      FHGGBLIP_12                1284 bp    DNA        linear      12-APR-2021
DEFINITION Campylobacter species strain strain.
ACCESSION
VERSION
KEYWORDS   .
SOURCE     Campylobacter species
  ORGANISM Campylobacter species
            Unclassified.
COMMENT    Annotated using prokka 1.14.6 from
            https://github.com/tseemann/prokka.
FEATURES   Location/Qualifiers
  source   1..1284
            /organism="Campylobacter species"

```

```

        /mol_type="genomic DNA"
        /strain="strain"
gene     complement(584..1273)
        /gene="trxB_5"
        /locus_tag="FHGGBLIP_00043"
CDS      complement(584..1273)
        /gene="trxB_5"
        /locus_tag="FHGGBLIP_00043"
        /inference="ab initio prediction:Prodigal:002006"
        /inference="similar to AA sequence:RefSeq:CKG86610.1"
        /codon_start=1
        /transl_table=11
        /product="thioredoxin reductase"
        /protein_id="Prokka:FHGGBLIP_00043"
        /translation="MTGFKARTQAVNFLLIQLGHEQGFTSLYDSYAYRGLTDGIHKNP
LKAQMLKDFAKNPPYDELGMLPFLDELIGVDWVIDANNYDIAYDGAKGNIIWALDDD
LKGKLDPRDIDSTPESRDEFDNYLDGYKNGMTEHYTLEISHDTPEKSANLWLETMLL
EAIKALTPPQGYPNAPYYFTPERLEFIYKNHDLKLLDPRIPAIYRYNFRDLRAKI
LKFGEENGIKD"

```

ORIGIN

```

1  catcacttaa atgagctaag cctctattgg cttctacttc tttgtaaagt tctttatagt
61  ctttattgat taaatttcct ttttcatcta cattacaata agcatcataa ggtatatcta
121 taacagtact tctaagtcca cttcttataa ttaaataatt atatctttct cttttggttt
181 ttaaagattt ataataagct ttttctgctt tagtccaagg agctatgctt cttttgatag
241 gatcttttaa atatatgctt tgccattctt taaattcaag caaagtggat ttttgccctg
301 tataaaaagt aggatctaga tatattgggt tatagtcttt gtagggggag tttcttaata
361 tgcgatcacc ctccaagaga gcttgagaat gttgtttagt gtatgtacca ttgctttttg
421 ccgtaaataa tttttattt gtatcttttt ctacatttaa tattgagcca tctgggtgtat
481 aatctcata agtatcactc atcttttatc ctttctttaa ttaacctata tgcaaaccat
541 ttttcataat gatagtagtg gctagcctgc ctatgtaatt actttaatcc ttaatgccat
601 tttcttcgcc aaatttgagt atcttagctc ttaaattcct tgggaaatta tatctataaa
661 tagcagggat tcttgatca aggagtttgt ctaaattcatg atttttgtaa ataaattcta
721 atctttcagg tgtaaaataa taagggtgat taggatagcc ttgaggaggg gttagggtctt
781 taattttggc ttctaacagc attgtttcta accaaagatt tgcggatttt tccgggtgtgt
841 catggcttat ttctagagta taatgctctg tcattccatt tttgtaacca tctaaatagt
901 tgcgaaattc atctctactc tccggagtag aatctatatc tcttgatctt ttaattttac
961 cttttaacac atcatcatct aaagcccaa taatattacc ctttgcccca tcataagcga
1021 tatcataatt attcgcatac atcaccatc ccaccctat aagttcatct aagaaaggaa
1081 gcattcccaa ttcatcataa ggaggatttt tagcaaagtc ttttagcatt tgagctttaa
1141 gagggttttt gtgtatgcca tctgttaaac ctctatatgc ataagaatca taaagacttg
1201 taaagccttg ttcatgtcct agttgtatga gtaaaaaatt tactgcttgg gttcttgctt
1261 taaatcctgt catagaaagt tgta

```

//

```

LOCUS      FHGGBLIP_13                1228 bp    DNA        linear        12-APR-2021
DEFINITION Campylobacter species strain strain.
ACCESSION
VERSION
KEYWORDS   .
SOURCE     Campylobacter species
ORGANISM   Campylobacter species
           Unclassified.
COMMENT    Annotated using prokka 1.14.6 from
           https://github.com/tseemann/prokka.
FEATURES   Location/Qualifiers

```

```

source      1..1228
            /organism="Campylobacter species"
            /mol_type="genomic DNA"
            /strain="strain"
gene        66..869
            /locus_tag="FHGGBLIP_00044"
CDS         66..869
            /locus_tag="FHGGBLIP_00044"
            /inference="ab initio prediction:Prodigal:002006"
            /inference="similar to AA sequence:RefSeq:CKG86263.1"
            /codon_start=1
            /transl_table=11
            /product="hypothetical protein"
            /protein_id="Prokka:FHGGBLIP_00044"
            /translation="MQKTFQIDLEKRKALENFKNLALLGLGGTMLLNLKEQPLDFNQE
            LTYINTYDKYLNKLDSEFYIPSTLLSLLQLNQKSKEAFYINVLINSDTYKPNLLQYA
            ITQKQEQENVVYALKNDENLNTSFTNLNALKLALKEKNFYLNFDLNSKESLLSFYNQ
            IISNNHLRNYFYFKDNQFFIKKDIKNKILFHSIHSSSIISNYLNLLNGFNTLSKIELI
            KILESLSLYNLSTLMQTMQTIQSKNEYGSKGFDKDGIFLSNMIMNVRK"

```

ORIGIN

```

1 aagatactag cttatgctaa agaacataat atcaaagatt aaaccacaaa agaaaggaaa
61 aacaaatgca aaaaacattt caaatcgatt tagaaaaaag aaaagcttta gagaatttta
121 aaaatctagc tttattagga ttaggcggaa caatgctttt aaatttaaaa gaacagcctt
181 tagattttta tcaagaatta acttatataa atacttatga taagtattta aacttaaagc
241 ttgattcttt ttatatccct tctacacttt tatctttact tcaattaaat caaaaaagca
301 aagaagcttt ttatatcaat gttttaatca atagtgatac atactataaa aaccctttat
361 tacaatatgc tatcactcaa aaacaagaac aagaaaatgt cgtttatgct ttaagaatg
421 atgaaaatct taatacttct tttactaatc ttaatgcttt aaaattagct ttagaagaaa
481 agaattttta tcttaatttt atagacttaa acagcaaaga aagtccttta agtttttata
541 atcaaataat aagtaataat catcttagaa attattttta ttttaaagat aatcaatttt
601 ttattaaaaa agatataaaa aataaaaattt tatttcatag tattcactct tcttctatta
661 taagtaatta tcttaactta ttaaattggtt ttaatacttt aagcaagata gaactcataa
721 aatatttaga aagtttaagt ttgtataacc tttcaacttt aatgcaaact atgcaaacta
781 tacaatcaaa aatgaatat ggctcaaaag gctttgataa agatggatc tttttatcta
841 atatgattat gaatgtgaga ttgaaataag taaatgatag atttagcagg tgtgatttgt
901 taatgaaaat atacatctcc aattgatttg aaaaaatagc aaggttttaa aaaagcaata
961 caagagagaa aatttaaaga atttgggtaa tgcatttgaa tgcaactgga ttttagtaga
1021 tataaattta aataaaaattt atcaagaagt tttttctata aagactatgc attttttaaa
1081 aaaagtattt ttaaaccaaa gtttttacta tgataataaa acctattatt taagaaatta
1141 aacttaaaaa tgaaaatttg attatcaaag ttcttagtga tttttcaaag ctttagaaga
1201 tattataaaa ctcacacagt ataatcag

```

//

```

LOCUS      FHGGBLIP_14                1209 bp    DNA        linear        12-APR-2021
DEFINITION Campylobacter species strain strain.
ACCESSION
VERSION
KEYWORDS   .
SOURCE     Campylobacter species
  ORGANISM Campylobacter species
            Unclassified.
COMMENT    Annotated using prokka 1.14.6 from
            https://github.com/tseemann/prokka.
FEATURES   Location/Qualifiers
  source   1..1209

```



```

/organism="Campylobacter species"
/mol_type="genomic DNA"
/strain="strain"
gene complement(590..1132)
/genes="trxB_6"
/locus_tag="FHGGBLIP_00045"
CDS complement(590..1132)
/genes="trxB_6"
/locus_tag="FHGGBLIP_00045"
/inference="ab initio prediction:Prodigal:002006"
/inference="similar to AA sequence:RefSeq:CKG86288.1"
/codon_start=1
/transl_table=11
/product="thioredoxin reductase"
/protein_id="Prokka:FHGGBLIP_00045"
/translation="MLKDFAKNPPYDEFGMLPFLDELIGVDWVIDLNEYQFAYDGDGG
SVKALDEKVRQGKLDPRDIDSTPESRKEFDEEANAYTFGNRMNFSSDIRDSRSKESA
RLFDDLLILHAKLAALTPPQGYPNAPYYFSPEQLEDFYKRQVLDKLDPRIPAIYRYN
FPRELRAKILKFGGEENGIKD"

```

ORIGIN

```

1 catcacttaa atgagctaag cctctattgg cttctacttc tttgtaaagt tctttatagt
61 ctttattgat taaatttcct ttttcatcta cattacaata agcatcataa ggtatatcta
121 taacagtgct tcttatacca cttcttataa ttaaataattt atatctttct cttttagttt
181 ttaaagattt ataataagct ttttctgctt tagtccaagg agctatgctt cttttgatag
241 gatcttttaa atatatactt tgccattctt taaattctac tagagtggat ttttgccctg
301 tataaaaagt aggatctaga tactgggggtt gatagtcttt gtgggggggag ttttccatga
361 tttcccaagc tttgaagagg gctttggaat attctttggt atattttcct gtggggtttg
421 aacttttatc aaaatatatt tcattagttt ttttattaac atctaatatg gaaccatgtg
481 gtgtataaat ctcataagta tcactcatct tttatccttt ctttatttaa cctatatgca
541 aaccattttt cataatgata gtagtggcta gcctgcctat gcaattactt taatctttaa
601 tgccattttc ttcgcaaat ttgagtatct tagctctaag ttcccttggg aaattatatac
661 tataaatagc agggattctt ggatcaagtt tagcgtctaa aacttgtctt ttgtaaaaat
721 cttctaattg ttcaggacta aaataataag gtgcattagg ataaccttga ggaggagtga
781 gggctgcgag tttggcatga agtatcaaaa ggtcatcaaa taatctagcc gattctttac
841 ttctactatc gcgaatatca gaggaaaaat tcattctatt accaaaagta taagcattag
901 cttcttcatc gaattctttc ctgctctctg gagtagaatc tatatctctt ggatctttta
961 atttaccttg tcttactttc tcactctaaag ccttaacact accgccatca ccatcataag
1021 caaattgata ttcatcctaa tcaatcacc aatccactcc tataagttca tctaagaaag
1081 gaagcattcc aaattcatca taaggaggat ttttagcaaa gtcttttagc attttctctc
1141 ttaaaggatt tttatgtcct ccacctgcta aggctacaga agatgagtaa gtagtgagtt
1201 ggtgttcta

```

//

```

LOCUS FHGGBLIP_15 994 bp DNA linear 12-APR-2021
DEFINITION Campylobacter species strain strain.
ACCESSION
VERSION
KEYWORDS .
SOURCE Campylobacter species
ORGANISM Campylobacter species
Unclassified.
COMMENT Annotated using prokka 1.14.6 from
https://github.com/tseemann/prokka.
FEATURES Location/Qualifiers
source 1..994

```

```

/organism="Campylobacter species"
/mol_type="genomic DNA"
/strain="strain"
gene complement(366..908)
/genes="trxB_7"
/locus_tag="FHGGBLIP_00046"
CDS complement(366..908)
/genes="trxB_7"
/locus_tag="FHGGBLIP_00046"
/inference="ab initio prediction:Prodigal:002006"
/inference="similar to AA sequence:RefSeq:CKG86610.1"
/codon_start=1
/transl_table=11
/product="thioredoxin reductase"
/protein_id="Prokka:FHGGBLIP_00046"
/translation="MLKDFAKNPPYDELGMLPFLDELIGVDWVIDVNKYQFAYDEKGR
VNDALKDDVEKGILKDPREDIDSTPESRWEFDKEMDAYKNGMRTFRDGDNPNHWSKEQV
ERFNDTLILCAKLAALTPPQGYPNAPYYYSERLEFIYKHKHKLDRLEDPRIPAIYRYN
FPRELRAKILKFGEEGIKD"

```

ORIGIN

```

1 gcttcctttg ataggatcct ttaaataat gttttgcat tctttaaatt ctactagagt
61 ggatttttgc cctgtataaa agttaggagc tagatactgg ggttgatagt ctttgtaggg
121 ggagtttctt aggattttat cagctttaa aaccgctttg gaatattcct gagtgtatct
181 gcctgtaggc ttggagttct tattgaaata ttttttatt gtaagtttat ttacctctaa
241 ttctgctgta ttgggaacta gcaccttata aatatcttta ttattaccac tcattgtttg
301 tcctttcctt aattaaccta tatgcaaacc atttttcata atgatagtag tggcctttaa
361 ttactttaat ctttaatgcc attttcttcg ccaaatttga gtatcttagc tctaagttcc
421 cttgggaaat tataatctata aatagcaggg attccttgat cttctaactc atcaagcttg
481 tgttttttgt aaataaattc taatctttca ggagagtaat aataaggggc attaggatag
541 ccttgagggg gagttagggc tgcgagtttg gcacataaaa tcaaagtatc attaaatctc
601 tctacttgct ctttactcca atgatttgga ttatctccat caaatctagt tctcattcca
661 ttcttataag catccatctc tttgtcaaac tcccacctac tctctggagt agaacttata
721 tctcttgat ctttgagtat tcctttttca acatcatctt ttagagcatc attaaactct
781 cctttttcat cataggcaaa ttgatattta ttcacatcta tcaccaatc cactcctata
841 agttcatcta gaaaaggtag cataccaat tcatcataag gaggattttt agcaaagtct
901 ttttagcatt gagctttaag agggtttttg tgtatgcat ctgttaaadc tctatatgca
961 taagaatcat aaagactttt aaagccttgt tcat

```

//

```

LOCUS FHGGBLIP_16 861 bp DNA linear 12-APR-2021
DEFINITION Campylobacter species strain strain.
ACCESSION
VERSION
KEYWORDS .
SOURCE Campylobacter species
ORGANISM Campylobacter species
Unclassified.
COMMENT Annotated using prokka 1.14.6 from
https://github.com/tseemann/prokka.
FEATURES Location/Qualifiers
source 1..861
/organism="Campylobacter species"
/mol_type="genomic DNA"
/strain="strain"
gene complement(97..609)

```

```

CDS      /locus_tag="FHGGBLIP_00047"
         complement(97..609)
         /locus_tag="FHGGBLIP_00047"
         /inference="ab initio prediction:Prodigal:002006"
         /inference="similar to AA sequence:RefSeq:AVS37480.1"
         /note="DUF2974 domain-containing protein"
         /codon_start=1
         /transl_table=11
         /product="hypothetical protein"
         /protein_id="Prokka:FHGGBLIP_00047"
         /translation="MNNYNPFNPTYADILNITYKYYLDDNGKPKDGGFFDNGFLGGFEFS
PLQAKQFFSRYDLLKHCNPNTNSGFSATLFGEKRKQINSKTKEKSYTSEYGYINYILAT
RGTEMSSFKDLLVADASLAIGSIPKAQYDDMINFYETCIKDYPQITKKKTLPLQDIL
LEAVLHNSLL"
gene     complement(587..790)
CDS      /locus_tag="FHGGBLIP_00048"
         complement(587..790)
         /locus_tag="FHGGBLIP_00048"
         /inference="ab initio prediction:Prodigal:002006"
         /codon_start=1
         /transl_table=11
         /product="hypothetical protein"
         /protein_id="Prokka:FHGGBLIP_00048"
         /translation="MKNKAVINKLKDENSELAWAAYGYFHLANESYKPEENSKDWKRLK
YFRKLYKNNNLESSKTDEQLQSI"

```

ORIGIN

```

1 ctatataatc ataaggaggt attatctttc tagctccagg tgcattataa gtatataaag
61 ctttgatatt atttctattc ttatcatcac agatacttaa agcaaagagt tgtgcaagac
121 agcctccaag agaatgtcct gtaatggtaa gagagtcttt ttctttgtga tttgtggata
181 atctttaata caagtttcat aaaagtttcat catatcatca tattgggctt tgggtataga
241 gcctatggct aaagaagcat cggctacaag caaatcttta aaagaactca tttctgttcc
301 tctagtggct aaaatataat tgatatagcc atattcactg gtatagcttt tttctttagt
361 tttactatta atttgttttc ttttttctcc aaataaagta gcagaaaaac ctgaatttgt
421 attagggcaa tgttttaata aatcatagcg agaaaagaat tgttttagctt ggagtgggga
481 gaattcacca cctaagaagc cattatcaaa gaagccatct ttggggttgc cattatcatc
541 aagatagtat ttataggtaa tgttgagtat atctgcgtag gtgggggtaa atggattgta
601 attgttcatc ggttttacta gattctaaat tattgttttt atataatatt ctaaaatatt
661 ttaatctttt ccaatcctta ctattttcct ctggcttata actttcatta gctaaatgaa
721 aatatccata ggctgcccaa gcaagttctg aattatcttt tagcttatta atcactgctt
781 tatttttcat tgttttagtc tttttgaaat atatacaact tattgggaca cttcctaaaa
841 aaaatcctat ccctcatta c

```

//

```

LOCUS      FHGGBLIP_17                804 bp    DNA        linear        12-APR-2021
DEFINITION  Campylobacter species strain strain.
ACCESSION
VERSION
KEYWORDS    .
SOURCE      Campylobacter species
  ORGANISM  Campylobacter species
            Unclassified.
COMMENT     Annotated using prokka 1.14.6 from
            https://github.com/tseemann/prokka.
FEATURES    Location/Qualifiers
  source    1..804

```

```

/organism="Campylobacter species"
/mol_type="genomic DNA"
/strain="strain"
gene complement(86..793)
/organism="Campylobacter species"
/mol_type="genomic DNA"
/strain="strain"
/locus_tag="FHGGBLIP_00049"
CDS complement(86..793)
/organism="Campylobacter species"
/mol_type="genomic DNA"
/strain="strain"
/locus_tag="FHGGBLIP_00049"
/inference="ab initio prediction:Prodigal:002006"
/inference="similar to AA sequence:RefSeq:CKG87041.1"
/codon_start=1
/transl_table=11
/product="thioredoxin reductase"
/protein_id="Prokka:FHGGBLIP_00049"
/translation="MTGFKARTQAVNFLLIQLGHEQGFTSLYDSYAYRGLTDGIHKNP
LKAQMLKDFAKNPPYDEFGMLPFLDELIGVDWVIDANKTIATNENNIVIDSQGYIIRA
LEDRVKKGKIKDPRDIDSTPESRDEFDNYLDGYKNGMTEHHYTLTLEISHDTPEKSANLW
LETMLLEAKIKALTPPQGYPNAPRYYSERLEFIYNKHKLDSKLDPRIPAIYRANFPE
ELRAKILAYAKEHNIKD"

```

ORIGIN

```

1 agatttttaa aattctctaa agcttttctt ttttctaaat cgatttgaaa tgttttttgc
61 atttgttttt cttttctttt gtggtttaat ctttgatatt atgttcttta gcataagcta
121 gtatcttggc tctaagctct tcaggaaagt tagctctata aatagcaggg attctaggat
181 caagtttaga atcaagtttg tgtttgttgt aaataaattc taatctttca ggactatagt
241 atcttggtgc attaggataa ccttgaggag gggttagggc ttttaattttg gcttctaaca
301 gcattgtttc taaccaaga tttgcggatt tttcgggtgt gtcattggctt atttctagag
361 tataatgatg ctctgtcatt ccatttttgt aaccatctaa atagtgtgca aattcatctc
421 tactctccgg agtagaatct atatctcttg gatcttttat tttacctttt ttaactctat
481 cctctaaagc acgaataata taaccttgac tatcgataac tatattattt tcatgtgtgg
541 ctatagtttt attcgcatca atcaccatct ctactcctat aagttcatct aagaaaggta
601 gcattccaaa ttcatcataa ggaggatttt tagcaaagtc ttttagcatt tgagctttta
661 gagggttttt gtgtatacca tctgttaaac ctctatatgc ataagaatca taaagacttg
721 taaagccttg ttcatgtcct agttgtatga gtaaaaaatt tactgcttgg gttcttgctt
781 taaatcctgt catagaaagt tgta

```

//

```

LOCUS FHGGBLIP_18 789 bp DNA linear 12-APR-2021
DEFINITION Campylobacter species strain strain.
ACCESSION
VERSION
KEYWORDS .
SOURCE Campylobacter species
ORGANISM Campylobacter species
Unclassified.
COMMENT Annotated using prokka 1.14.6 from
https://github.com/tseemann/prokka.
FEATURES Location/Qualifiers
source 1..789
/organism="Campylobacter species"
/mol_type="genomic DNA"
/strain="strain"
gene 144..695
/organism="Campylobacter species"
/mol_type="genomic DNA"
/strain="strain"
/locus_tag="FHGGBLIP_00050"

```

CDS 144..695  
 /gene="trxB\_9"  
 /locus\_tag="FHGGBLIP\_00050"  
 /inference="ab initio prediction:Prodigal:002006"  
 /inference="similar to AA sequence:RefSeq:CKG86610.1"  
 /codon\_start=1  
 /transl\_table=11  
 /product="thioredoxin reductase"  
 /protein\_id="Prokka:FHGGBLIP\_00050"  
 /translation="MIYDLHDHHYESLLDEFGLPFLDEIIGADWTIDLNKYDFAYDE  
 EGRIIWALYNDIEKGLKDPDSTPESRNEFDDAMDGYRNGMKTNFDVDTPNWESE  
 QQAALDRDTLVLSAKLAALTPPQGYPNAPYYFTPERLEWIYKRGYLDKLLDPRIPAIY  
 RYNFPRELRAKILKFAEENGIKD"

ORIGIN

```

1 taggatttaa agcaagaca caacaagctt tatttttaca agctcaattt ggagataaaa
61 atgcttttaa gagtttaggt ttagcagtat tgtgttctaa ttcttttctt acagggcaac
121 attggaataa gcttagagca aaaatgattt acgatttaca cgatcatcat tatgagagtt
181 tgtagatga atttggtatg ctaccttttt tagatgagat tataggagca gattggacga
241 ttgatttaaa taaatatgat tttgcctatg atgaagaagg tagaatcatt tgggctttat
301 ataatgatat tgaaaaaggc aaattaaag atccaagaga tgtggattct actcctgaaa
361 gtagaaatga atttgatgat gctatggatg gatatagaaa tgggatgaaa actaactttg
421 atgtagatac tccaaatgaa tggagtgaac aacaagctgc tttagataga gatactttag
481 tattaagtgc caaactcgca gccctcactc ctccacaagg ctatcctaact gccctttatt
541 attttacacc tgaagatta gaatggattt ataaaagagg atatttagat aaactccttg
601 atccaagaat ccctgctatt tatagatata atttcccaag ggaacttaga gctaagatac
661 tcaaatttgc tgaagaaaat ggcattaaag attaaaaaat cactcaaaat ctttaataata
721 cttttccaat gcttttaggg taagattctc aaaaagaatc ttatcttctt tgatattggt
781 ttgtagggc

```

//

```

LOCUS      FHGGBLIP_19          760 bp    DNA      linear      12-APR-2021
DEFINITION Campylobacter species strain strain.
ACCESSION
VERSION
KEYWORDS   .
SOURCE     Campylobacter species
  ORGANISM Campylobacter species
            Unclassified.
COMMENT    Annotated using prokka 1.14.6 from
            https://github.com/tseemann/prokka.
FEATURES   Location/Qualifiers
  source   1..760
            /organism="Campylobacter species"
            /mol_type="genomic DNA"
            /strain="strain"
  gene     complement(420..599)
            /locus_tag="FHGGBLIP_00051"
  CDS     complement(420..599)
            /locus_tag="FHGGBLIP_00051"
            /inference="ab initio prediction:Prodigal:002006"
            /inference="similar to AA sequence:RefSeq:AAW35464.1"
            /note="conserved hypothetical protein"
            /codon_start=1
            /transl_table=11
            /product="hypothetical protein"

```

/protein\_id="Prokka:FHGGBLIP\_00051"  
/translation="MYMGINGNKDKTSNTRSRSKEDMASKIDANADIASETKTPPNFIG  
RLATTTIIIEDGLYMG"

ORIGIN

```
1 agggatatc tataaccaca gatcttaatc cacttcttat tgccaaatac ttacatcttt
61 ctcttttagt ttttaaagat ttataataag ctttttctgc ttttagtccaa ggagctatgc
121 ttccttttat aggatctttt aaataaatgt tttgccattc tttaaattca agtaaagtgg
181 atttctctcc tgtataaaaag ttaggatcta gatataattgg tttatagtct ttgtaggggg
241 agtttcttaa tatgcatcg gcttcaaaca aagctttgga atattcttcg gtataattgc
301 ctgtggggtt agcatttcct gaaaaaatga ttttattagt atctttatat acatccatta
361 tcaaccatt ggggtgataa atctcataag tttcgctcac tttttatcct ttcttaaatt
421 tatcccatgt ataaaccatc ttctatgatt atagtagtag ctagtctacc tatgaagtta
481 ggcggagttt ttgtttctga tgcaatatca gcatttgcac ctatcttact agccatatct
541 tccttgcttc tacttgtatt agaagtttta tctttatttc catttatccc catatacata
601 gctttaagat tgttttgtcc tatgatattg agtttttcta gtaatcttct ggtttttattt
661 ttatcttcta tacattttcc tgttttatct ttgcttgtat tgtaaattcc attagcaaaa
721 tcttgtaaaa tttgtaaagc ttcattataa gcatggatgg
```

//

LOCUS FHGGBLIP\_20 738 bp DNA linear 12-APR-2021

DEFINITION Campylobacter species strain strain.

ACCESSION

VERSION

KEYWORDS .

SOURCE Campylobacter species

ORGANISM Campylobacter species

Unclassified.

COMMENT Annotated using prokka 1.14.6 from  
<https://github.com/tseemann/prokka>.

FEATURES

source

Location/Qualifiers

1..738

/organism="Campylobacter species"

/mol\_type="genomic DNA"

/strain="strain"

gene

complement(353..706)

/gene="tssI1"

/locus\_tag="FHGGBLIP\_00052"

CDS

complement(353..706)

/gene="tssI1"

/locus\_tag="FHGGBLIP\_00052"

/inference="ab initio prediction:Prodigal:002006"

/inference="similar to AA sequence:RefSeq:A0H52008.1"

/codon\_start=1

/transl\_table=11

/product="type VI secretion system, secreted protein"

/protein\_id="Prokka:FHGGBLIP\_00052"

/translation="MKGENKLLIEKSLTQTIEKEFFLNHVQNLSAHIQDNTSLKSNM  
QTKIEEQYSLESDNSTFDFQTDCEVKAGNQILHQVGDQIVTRKDCVVIKAGGVEVVI  
DSNGLVVRGGEVKAE"

ORIGIN

```
1 caaaaaaagt tcctaaagga aaaaccaaat catttttgat ataatactca atcacaagtt
61 tttcttttgt gatataaatt cttttaatat ttgccattct atagatcttt tgtgcaagtg
121 catatatgcc taaaagaaat gtaaaaaaaa ctataaacca tttataatct atttctttgc
181 taggattaaa taatctagga aataaataaa gaaaaagaca taaaagcaca atatatgtta
241 tccaaaaaag caaaaacgaa ggtatatgct tttttccttc ccaaatgatt tcatcttggg
```

```
301 tgtcttgctc tttgatttct gtgttattgt ttatttcact catttttatac ctttactctg
361 cttttacttc tccacctcta accacaagtc cattagagtc tatcactact tcaactccac
421 ctgctttaat gataacacaa tctttcctag taacaatttg agtatcacct acttgatgga
481 ggatttgatt gcctgctttt acttcacaat ctgtttgaaa gtcaaaagtt gaattatctg
541 attctaaaga atattgctct tctatctttg tttgcatgga attagacttt aaagatgtat
601 tatcttgat gtgggcggat aaattttgat ggacattaag gaaaaattct ttttctattg
661 tttgggtaa agatttttct attaataatt tattttctcc cttcacattc cttatctcat
721 ctttatggat aatagtat
```

//

LOCUS FHGGBLIP\_21 699 bp DNA linear 12-APR-2021

DEFINITION Campylobacter species strain strain.

ACCESSION

VERSION

KEYWORDS .

SOURCE Campylobacter species

ORGANISM Campylobacter species  
Unclassified.

COMMENT Annotated using prokka 1.14.6 from  
<https://github.com/tseemann/prokka>.

FEATURES

Location/Qualifiers  
source 1..699  
/organism="Campylobacter species"  
/mol\_type="genomic DNA"  
/strain="strain"  
gene complement(288..467)  
/locus\_tag="FHGGBLIP\_00053"  
CDS complement(288..467)  
/locus\_tag="FHGGBLIP\_00053"  
/inference="ab initio prediction:Prodigal:002006"  
/inference="similar to AA sequence:RefSeq:AAW35464.1"  
/note="conserved hypothetical protein"  
/codon\_start=1  
/transl\_table=11  
/product="hypothetical protein"  
/protein\_id="Prokka:FHGGBLIP\_00053"  
/translation="MYMGINGNEDKTSNTRSRSKEDMASKIDANADITSETKTPNCIG  
RLATIIIIEDGLYMG"

ORIGIN

```
1 gatcttttaa atatatgctt tgccattctt taaattcaag caaagtggat ttttgcctg
61 tataaaagtt aggatctaga tatattgggt tatagtcttt gtagggggag tttcttaata
121 tgcgatcggc ttcaaacaaa gctttggaat attcttcggt ataattgcct gttggtttag
181 ctttcctga aaaaatgatt ttattagtat ctttatatac atccattatc aaccattgg
241 gtgtataaat ctcataagta tcaactcatta tttatccttt cttaaattta tcccatgtat
301 aaaccatctt ctatgattat agtagtggct agtctgccta tgcaattagg cggagttttt
361 gtttctgaag taatatcagc atttgcatct atcttactag ccatatcttc cttgcttcta
421 cttgtattag aagttttatc ttcatttcca tttatcccca tatacatagc ttttaagattg
481 ttttgcctta tgatattgag cttttctagt aatcttctgg ttttattttt atcttctata
541 cattttcctt cttcatatth gacaatataa agtccattag caaaatcttg taaaatttgg
601 aaagcttcat tgtaagcttg aatggctgtt aaattgattt catcattaac ttctttataa
661 tacttttcta atgtagtggt ttttaggata taaatttca
```

//

>>BfR-CA-15855\_min\_cov\_30 putative plasmid location

LOCUS           JOBBOHMI\_1                   28513 bp     DNA       linear           12-APR-2021  
 DEFINITION     Campylobacter species strain strain.  
 ACCESSION  
 VERSION  
 KEYWORDS       .  
 SOURCE         Campylobacter species  
   ORGANISM     Campylobacter species  
               Unclassified.  
 COMMENT       Annotated using prokka 1.14.6 from  
               <https://github.com/tseemann/prokka>.  
 FEATURES  
   source        Location/Qualifiers  
                   1..28513  
                   /organism="Campylobacter species"  
                   /mol\_type="genomic DNA"  
                   /strain="strain"  
   gene          complement(198..1001)  
                   /locus\_tag="JOBBOHMI\_00001"  
   CDS           complement(198..1001)  
                   /locus\_tag="JOBBOHMI\_00001"  
                   /inference="ab initio prediction:Prodigal:002006"  
                   /codon\_start=1  
                   /transl\_table=11  
                   /product="hypothetical protein"  
                   /protein\_id="Prokka:JOBBOHMI\_00001"  
                   /translation="MKHFIFGVNQKSKKLSLALISSLIIGNNAFAGGIPVIDVSAIAN  
                   QVKDYAMQLQQYEQMYSQLQQQIQMVQMVKQNLRLTKEDWDNLGTVLYQTRNVMNKV  
                   NGISYDIGNVSRKFEDTYKDFEGYSNDLENATNESEKNKIYSDRYKQIAETNQNTFNG  
                   TLQQLELRYQDLESEDALIAKQNSQNSGNLQAVQATNDLLAYQIDEIRKLRSVIM  
                   DQSNMLTNYLASQNNQRIMQQAIDKFIEDTGYIEKTWKGKSNPDALKWK"  
   gene          complement(998..1603)  
                   /locus\_tag="JOBBOHMI\_00002"  
   CDS           complement(998..1603)  
                   /locus\_tag="JOBBOHMI\_00002"  
                   /inference="ab initio prediction:Prodigal:002006"  
                   /codon\_start=1  
                   /transl\_table=11  
                   /product="hypothetical protein"  
                   /protein\_id="Prokka:JOBBOHMI\_00002"  
                   /translation="MLDLLKGVMSNTSIININNQEVIKDEQVFCTSLDVAKVFG  
                   KQKHILELIGEFNNEIKNFCEPNFRLSFKTRKIEGFRGRERKYPYQLTKDGFSS  
                   IAMGLTGRKADKFKIAFINAFNEMERIIKNQYTPKLNKYNKYKIPNTPYKENIIKAIM  
                   QTEQNRNCFEELIAYEITETYKDNKSHIEQKINFKVKGLI"  
   gene          complement(1588..2259)  
                   /locus\_tag="JOBBOHMI\_00003"  
   CDS           complement(1588..2259)  
                   /locus\_tag="JOBBOHMI\_00003"  
                   /inference="ab initio prediction:Prodigal:002006"  
                   /inference="similar to AA sequence:RefSeq:ASI88311.1"  
                   /codon\_start=1  
                   /transl\_table=11  
                   /product="IncQ plasmid conjugative transfer protein TraQ"  
                   /protein\_id="Prokka:JOBBOHMI\_00003"  
                   /translation="MKNFIFGVKKITLALSATLLISSNAFADDILTGDTKLACEAILC  
                   LSSGTRPSECSSSLARYFSIKFKKPWETINARRAFLNLCPIQNDANIEDLVLNVLVDD



VLPVSDPRQCTPNYLNTQVETKRSYSTFGIMSYRINPNMPNFCHALINHAYTDYKTPK  
 YKCTGEFYNSLEWKLSAKLQLITQQAYESLSDQRYMISRTCGDRNCYDYYQKIPFTK  
 ECWTY"

gene complement(2256..4721)  
 /locus\_tag="JOBBOHMI\_00004"

CDS complement(2256..4721)  
 /locus\_tag="JOBBOHMI\_00004"  
 /inference="ab initio prediction:Prodigal:002006"  
 /inference="similar to AA sequence:RefSeq:ASI88309.1"  
 /codon\_start=1  
 /transl\_table=11  
 /product="IncP-type conjugative transfer protein TrbE"  
 /protein\_id="Prokka:JOBBOHMI\_00004"  
 /translation="MLALKEFRSKAKAFPDIILNYASFIDEIGILLNKDGS�TAGFYIRA  
 GDISSMTINERNTLSARINSVLKTLGNWAVHIDCSRIKTENYIDGDTFYKNNIAQIL  
 ENERKHYFDNVEHFENLFTMIFTYLPPhKSINKITDLMIIDETKNKNQGDKILEYFKN  
 TLQKLEDSLSNYIKIERMLPRIAIDEYNNYILDDMLEYINFCICGERQKIILPNAPM  
 FLDCLLGGRRHFETGMHPRIDNQCIGIIAIEGFPSESYPNILNALTELNFDRFNTRFI  
 FLDDFEAQNSLNKYRKKWQKTKGWLQQLDRPARKQDDHAVLMVQELDSALSESKSG  
 MIGYGYTANIVVFRDRYESLEYKLDVRKVLNGLFLSRTETINSVEAYLGTLPGFV  
 YPNLRRPILNLTNLTHLIPLASIWAGDKYNSSERFPPNSPPLMQVVTSGNTPFRLNLH  
 VSDLGHTLIFGPPGSGKSTLLANIFLAWQKYPNAKIYAFDKGQSLLAPTATGGIHYD  
 VAGDHSSLAFAPLANIKTDAEIAWAEFWIETCLKLQNVNITPKQKLIHEALISHINT  
 NSTSLTEFVSALQSDLRDALNYTISGTGGFLFDSEEDKLSLSSITTFEIEELMNLG  
 DQYIIPALLYIFNRIEKGLDGSPTLLIIDEAWIALKHPAFKDKIVNWLKVLKANKAV  
 IMATQSLSDSAKSGILDILQEYCPTKIFLPNPEAYKKGSENVLAPYDFYKIFGLNDVQ  
 ISIINNAIQREYYTSPGLTRLFNLALGKTNLAFITISDKVSVKRVRLYEKHKENW  
 AYKWLEEKEINYKRFDNSQKEQI"

gene complement(4725..5012)  
 /locus\_tag="JOBBOHMI\_00005"

CDS complement(4725..5012)  
 /locus\_tag="JOBBOHMI\_00005"  
 /inference="ab initio prediction:Prodigal:002006"  
 /inference="similar to AA sequence:RefSeq:ASI88308.1"  
 /codon\_start=1  
 /transl\_table=11  
 /product="IncP-type conjugative transfer protein TrbD"  
 /protein\_id="Prokka:JOBBOHMI\_00005"  
 /translation="MEELQRIDIYSALNKPNLIFGADRELILMVGVISFALIFTGATL  
 LTSIIGIFLFFFCNMLLRMAKSDPLMRQIFLRQIKYKFFYYAQSTPFSDK"

gene complement(5012..5308)  
 /locus\_tag="JOBBOHMI\_00006"

CDS complement(5012..5308)  
 /locus\_tag="JOBBOHMI\_00006"  
 /inference="ab initio prediction:Prodigal:002006"  
 /inference="similar to AA sequence:RefSeq:ASI88307.1"  
 /codon\_start=1  
 /transl\_table=11  
 /product="Conjugative transfer protein TrbC"  
 /protein\_id="Prokka:JOBBOHMI\_00006"  
 /translation="MKKFLILFLALGLGYALASTTGAGLPWEGPLEQIKASLSGPVAF  
 VISILAIIGAGAGLIWGNFSGFIKTLFYIVIVIALIVGANSFMSLFSTSGALI"

gene complement(5318..6256)  
 /locus\_tag="JOBBOHMI\_00007"

CDS complement(5318..6256)  
 /locus\_tag="JOBBOHMI\_00007"  
 /inference="ab initio prediction:Prodigal:002006"  
 /inference="similar to AA sequence:RefSeq:ASI88306.1"  
 /codon\_start=1  
 /transl\_table=11  
 /product="Conjugative transfer protein TrbB"  
 /protein\_id="Prokka:JOBBOHMI\_00007"  
 /translation="MSNLEFQARINEKIKREFGDILTHLEDKETIELMLNSDGKLLWE  
 KLGQDMICLGEFSEARAKSIITAISTLLDTTTTNADNPILECELPLDGSRFEALLPPIV  
 AKPTFTIRKKAVKIFTLGDYVDSNIITPNQKEVLINAIIERQNILVVGGTGSGKTTFS  
 NAIIDGISKITPNHRIVIIEDTAELQCASENKVILRATDKVDMLRLLKATMRLRPDRI  
 IVGETRGKEALDLLKAWNTGHPGGIATIHANSANGGLTRMEQLISEATNAKMSKLI AE  
 AVNLI V F I S K S K E G R K V K E I I K V I G Y E N D K Y I T Q A I "

gene complement(6797..7537)  
 /locus\_tag="JOBBOHMI\_00008"

CDS complement(6797..7537)  
 /locus\_tag="JOBBOHMI\_00008"  
 /inference="ab initio prediction:Prodigal:002006"  
 /codon\_start=1  
 /transl\_table=11  
 /product="hypothetical protein"  
 /protein\_id="Prokka:JOBBOHMI\_00008"  
 /translation="MLFNYEIINCQKPNNTMNIKRTYKVIRCFKKNKTDEASKYYQQA  
 WDLAKQVNPLKANDSTSQRDKERLILDALGGILA EYGFYIKRNFQDIVNFTEFKSS  
 IGQIDLLLNNGKTL E VRSSFP R N G I N F A I C N A K Y N F K N I C K Y D N L Y K P N E M D K D F F A C  
 V L F E T T K N Q M V K A D E I I F Y L I G G S T R K M M L D N T I S Y T D N L T A E D D L I Q Q K T N Y K V I R L  
 Y N A L D I E G F E K Y M T E E L G Y P K I L N D Q T F "

gene complement(7527..8444)  
 /locus\_tag="JOBBOHMI\_00009"

CDS complement(7527..8444)  
 /locus\_tag="JOBBOHMI\_00009"  
 /inference="ab initio prediction:Prodigal:002006"  
 /codon\_start=1  
 /transl\_table=11  
 /product="hypothetical protein"  
 /protein\_id="Prokka:JOBBOHMI\_00009"  
 /translation="MNKNSSSKLNNAKNIKND E FYTQYEDINKELNFYKNAFKDRIVY  
 CNCDDPQKSNFTKFFKLNFDRLKLLKLISTSFNSNGKGIKIFIEKNKPKYQGLLENNQ  
 DFRSDETIKLLKESNIIVTNPFFSLFREFIDMLISNQKDFLIIGNANAISYKNCFNMY  
 MKNKLWLGQNCVRFINTKGELVEGARSFWFSNINNQKRK K I S L N R K Y N N Q D Y I T Y D  
 N Y N A I E I S K S K D I P S D Y T G I M G V P I T F L D K Y N P Q Q F E I I G A D Y Q V N S G E L I Y I K R N D W  
 N G K T D R A Y I N G K R L Y S R I F I K H R G V N N A I "

gene complement(8467..8880)  
 /locus\_tag="JOBBOHMI\_00010"

CDS complement(8467..8880)  
 /locus\_tag="JOBBOHMI\_00010"  
 /inference="ab initio prediction:Prodigal:002006"  
 /inference="similar to AA sequence:RefSeq:ABS43377.1"  
 /note="conserved hypothetical protein"  
 /codon\_start=1  
 /transl\_table=11  
 /product="hypothetical protein"  
 /protein\_id="Prokka:JOBBOHMI\_00010"

```

/translation="MKKVYLDTNIFLDYFNTERTYHNEAKQLMYYLLTNNIQIVFSED
MISTIAYLIKKENLNNFTHFLKDISLEKNFNITSFGVSVINMACDYDYDKYRGDFEDYL
QYFCAEKEGCSAIYTMKDNFPNLKIPIKRYGEIDI"
gene      complement(8877..9791)
          /locus_tag="JOBBOHMI_00011"
CDS      complement(8877..9791)
          /locus_tag="JOBBOHMI_00011"
          /inference="ab initio prediction:Prodigal:002006"
          /inference="similar to AA sequence:RefSeq:CKG86570.1"
          /codon_start=1
          /transl_table=11
          /product="hypothetical protein"
          /protein_id="Prokka:JOBBOHMI_00011"
          /translation="MSNEIEIKDLNEINKNNKRQVVYRKDNLSTDYITGEVVERNQII
VKKVQTKESFIKLFTEIDYIINLESQEKTLFFTLSSVDYKNVVRFDKSMKQNIIVLD
KVLRSRAGMYRALNGLIEKKVIFKINREFVKSAGVGSDDCYLFPNPLVGRGSWNDLKN
LRHTITREWDFENLEVRENLEIEEYLGDFEIRNNQKQYQVKEINQEHDETTKVKNTE
IVIEEKNNNSINNQYSFDKKEEPSINKKVLISNDTQPSLFDENQKEQEARLFIEKYAGI
LTGAYDSTKSAKEMKRELLDKDLEEGRI"
gene      10523..10723
          /locus_tag="JOBBOHMI_00012"
CDS      10523..10723
          /locus_tag="JOBBOHMI_00012"
          /inference="ab initio prediction:Prodigal:002006"
          /codon_start=1
          /transl_table=11
          /product="hypothetical protein"
          /protein_id="Prokka:JOBBOHMI_00012"
          /translation="MNKDKKYLNFSEYYEVRDFLELYPEKDRENIENILITIGENKKS
KNLSFEFLYDFFKLGFEKCLI"
gene      complement(10732..11061)
          /locus_tag="JOBBOHMI_00013"
CDS      complement(10732..11061)
          /locus_tag="JOBBOHMI_00013"
          /inference="ab initio prediction:Prodigal:002006"
          /codon_start=1
          /transl_table=11
          /product="hypothetical protein"
          /protein_id="Prokka:JOBBOHMI_00013"
          /translation="MQRGEAKIEFYSNINYLLKKEFENGCVVSKFLYDKALKEKNFKMT
YKQFNKYFNDEFKNKIKIKETMQEDNQLQSLVLKNKEPIKLIKINTKPKKVFDAKFGKD
IKEDDLL"
gene      complement(11075..11524)
          /locus_tag="JOBBOHMI_00014"
CDS      complement(11075..11524)
          /locus_tag="JOBBOHMI_00014"
          /inference="ab initio prediction:Prodigal:002006"
          /codon_start=1
          /transl_table=11
          /product="hypothetical protein"
          /protein_id="Prokka:JOBBOHMI_00014"
          /translation="MDIKIATFEDIEFIKYCFLLGFKEKHFYVNRVRIEKLIEDIKNNG
VSGGIFIIKDGTTNEKAGFAFCGKSKGSNIYEINMIYILEKFRNKKLATNFIKYYEKLI
PNNKIIARCDINYSQQAIFKHLGYQELSKKEKTNQYEFMILEKSI"

```

gene 11734..12117  
 /locus\_tag="JOBBOHMI\_00015"  
 CDS 11734..12117  
 /locus\_tag="JOBBOHMI\_00015"  
 /inference="ab initio prediction:Prodigal:002006"  
 /codon\_start=1  
 /transl\_table=11  
 /product="hypothetical protein"  
 /protein\_id="Prokka:JOBBOHMI\_00015"  
 /translation="MRKDKRIAIRLSEDEYKHIMQKAQNHGLTISRRLDLSMNPIT  
 CIVDQKVAHNVLNIAGDIGRLGGLFKHWLVRNEDNKVNFVSNKRTYNDIDEIVDQILD  
 QILLKEQAKRIIQNDNQKDSKQAE"  
 gene 12080..14236  
 /locus\_tag="JOBBOHMI\_00016"  
 CDS 12080..14236  
 /locus\_tag="JOBBOHMI\_00016"  
 /inference="ab initio prediction:Prodigal:002006"  
 /inference="similar to AA sequence:RefSeq:ASI88299.1"  
 /codon\_start=1  
 /transl\_table=11  
 /product="IncP-type DNA relaxase TraI"  
 /protein\_id="Prokka:JOBBOHMI\_00016"  
 /translation="MIIKKIPSKKQNKSSFKNLSNYILDKDNNNAKVLVDYMLDKNNE  
 MDKVEGYHFTNCSFDNEDNINEIINTQKLNTTTKQDKTLHLVVSFQEDENPTLEILQ  
 AIEEEIAKSLGMEDHQRLSVVHSNTNHLHIHIAINKVNPHTLKVINPYNDVRILQETA  
 MKLEKKYNLKLDNHISQKDKQSNKYNTHTMNCNFETWVKEKLSKQVDLMLKDEKTTFK  
 DIKQFLAEYDLEFRERRKGFVIAASKSEKLFCKASSIHRGLSKQALEKRFKELDLKQEK  
 ENTKNIKEEKHEIKEQYQRPNKETSKTLWEKYLRIENEKKAELDKELRMLKLRNEFK  
 TSIPSMKFNKNTFAHVKNQRMIFKNKQKELYQKYKRVSYRDFLISESLSGNEEATRAL  
 RRTKTKINENENTLSSTQEKPKIFENVDYITKEGYAVYKSGFNKAIDKGEMLKVSLIN  
 NKDDKEFLNLSLLIAIDRFGNHLNITGDDKFKNRILEVANDYNLNVFSQDRMQKIQE  
 ENNNKRKEMKTRKVLKNIEELKIKLTEQDKDIDENIKEKELKALKFSLKKISNSTPSI  
 FKGELKKGFSYKEIDSMDESVCIEIDGFIVNSANKEGLVAMNEEIKQTLIDDEEIK  
 RFEKFEHLFLNTNKITDIAKGFYTNRKIDADEYIKRFSMQESKINKVANAISSMLSDKN  
 IDIMEKYAKKLEKDLKYQLKKVEVFASNDIDLNNF"  
 gene complement(14233..14697)  
 /locus\_tag="JOBBOHMI\_00017"  
 CDS complement(14233..14697)  
 /locus\_tag="JOBBOHMI\_00017"  
 /inference="ab initio prediction:Prodigal:002006"  
 /codon\_start=1  
 /transl\_table=11  
 /product="hypothetical protein"  
 /protein\_id="Prokka:JOBBOHMI\_00017"  
 /translation="MQYLIDNADYINIIIKLIQGLASIGVVIGLIIACLQLRNSSKNN  
 RINILKTEFDAFEKISNAEKNFVDYIEHLDLKQNLDEKNNLLNKKREEYYKTLNLI  
 CLYVLEKCFTKKHFLENYKNKLLKIYKILKNDNMLDKYINIKDVVEKYNLKP"  
 gene complement(14701..14895)  
 /locus\_tag="JOBBOHMI\_00018"  
 CDS complement(14701..14895)  
 /locus\_tag="JOBBOHMI\_00018"  
 /inference="ab initio prediction:Prodigal:002006"  
 /codon\_start=1  
 /transl\_table=11

```

        /product="hypothetical protein"
        /protein_id="Prokka:JOBBOHMI_00018"
        /translation="MKNQEYNVENLKICNESYDDQQRVFAALDLSYKMQTAYNQNTNS
gene      NQNQTNSNQNQTNSNQSDKK"
        complement(14947..15171)
        /locus_tag="JOBBOHMI_00019"
CDS      complement(14947..15171)
        /locus_tag="JOBBOHMI_00019"
        /inference="ab initio prediction:Prodigal:002006"
        /codon_start=1
        /transl_table=11
        /product="hypothetical protein"
        /protein_id="Prokka:JOBBOHMI_00019"
        /translation="MGFKLSSEAPKNENNFVNSARGETGNAKTGNAKRKLLMINFT
gene      EEEYQILNQEAHSMGLSLNSYVRFKIFRKD"
        complement(15174..15860)
        /locus_tag="JOBBOHMI_00020"
CDS      complement(15174..15860)
        /locus_tag="JOBBOHMI_00020"
        /inference="ab initio prediction:Prodigal:002006"
        /inference="similar to AA sequence:RefSeq:ASI88294.1"
        /codon_start=1
        /transl_table=11
        /product="Plasmid partitioning protein ParA"
        /protein_id="Prokka:JOBBOHMI_00020"
        /translation="MIISIVNEKGGSGKTTLAVNLSARLAEDGDNVLLIDADPQKSTE
VFSDMRSQSNLEPLFSNVSKTGISLGEIKRMKNAFDSIIIVDTGGRDSKEMRKAILSS
NIIIIPTIPSQYDVNVLDHMLEIYNEVIEINPNLLALVLRVSPNPFLLAKELENLKE
YINEAKKEKGLDRVIMLESVIYERQAYRKAVIEGKSMKEFCDKNDKALNDFENFYQEL
LKIANEKLGV"
gene      complement(15952..16347)
        /locus_tag="JOBBOHMI_00021"
CDS      complement(15952..16347)
        /locus_tag="JOBBOHMI_00021"
        /inference="ab initio prediction:Prodigal:002006"
        /codon_start=1
        /transl_table=11
        /product="hypothetical protein"
        /protein_id="Prokka:JOBBOHMI_00021"
        /translation="MNKKELIEEIAKKHHIILDENDPILAVVSANEIIFDDFLEKIDL
LFIKHKTDLESYKFNILNEIREYSKNNQEALKDILIQATNQNTIKASQEKTEDTKEK
KNTNINFWIIAIASQIIFLLVGLIIGIII"
gene      complement(16413..16880)
        /locus_tag="JOBBOHMI_00022"
CDS      complement(16413..16880)
        /locus_tag="JOBBOHMI_00022"
        /inference="ab initio prediction:Prodigal:002006"
        /codon_start=1
        /transl_table=11
        /product="hypothetical protein"
        /protein_id="Prokka:JOBBOHMI_00022"
        /translation="MRKTIAIFAFSFAFLSILSYLIFYFGGFHFNYTRSMPLGLYKEI
NSSTFNKNDIVLLKIPQKKEILLKKIIAVNGDFVEVNTQGVFINESLLPNSKIFSFDS
EGNLLFEKPFKRKLKENELFVMGENIKSYDSRYFGVVNQLQNEVKKVKLMI SF"

```

gene complement(16885..17538)  
/locus\_tag="JOBBOHMI\_00023"

CDS complement(16885..17538)  
/locus\_tag="JOBBOHMI\_00023"  
/inference="ab initio prediction:Prodigal:002006"  
/inference="similar to AA sequence:RefSeq:ASI88290.1"  
/codon\_start=1  
/transl\_table=11  
/product="Cell filamentation protein"  
/protein\_id="Prokka:JOBBOHMI\_00023"  
/translation="MKESNEELFKRLITDNKLGKDEKLFDKESRKYTSQRIDELITS  
PIKGNFDYQHLKNIHKHIFQDVFWAGKDRMEVGLHGNFGKYAPNGTITNFVPGKDLN  
ATAQQIFTWLKEDNYLKNSKDLNDFAKNLAEFARNLNALHPFREGNGRTQRIFLNELA  
KNAGYKLDLNLIPKDKTIMASVEASQLKLGKLEAIKTNLKSFRQNLBLEQNKGISL"

gene complement(17522..17776)  
/locus\_tag="JOBBOHMI\_00024"

CDS complement(17522..17776)  
/locus\_tag="JOBBOHMI\_00024"  
/inference="ab initio prediction:Prodigal:002006"  
/codon\_start=1  
/transl\_table=11  
/product="hypothetical protein"  
/protein\_id="Prokka:JOBBOHMI\_00024"  
/translation="MQKQYPEVHSLEESLAILKKYKDDVTKEQYENIKSNIGTHAIES  
IYLNELDIIMLVKKNVYGLSADEIIAEYQEKGFVEYERKQ"

gene complement(17867..18586)  
/locus\_tag="JOBBOHMI\_00025"

CDS complement(17867..18586)  
/locus\_tag="JOBBOHMI\_00025"  
/inference="ab initio prediction:Prodigal:002006"  
/inference="similar to AA sequence:RefSeq:ASI88288.1"  
/codon\_start=1  
/transl\_table=11  
/product="IncP-type DNA transfer protein TraL"  
/protein\_id="Prokka:JOBBOHMI\_00025"  
/translation="MAKIHFVLNGKGGIGKSFISLLCQYFLDKGESIVAIDTDPNNT  
TLLNVKALKAKFLQLIDDDGKFDVRAFDFKIVELAFEKKAENYIIDS GATTFIPLIDYL  
KENEVLDLFTNNNLEVYMHVPIVGGQARDDTILGLTQLTEAFNCSFVWINEYHGSII  
KDNLEFEETKEYQAIKEKIKAIIVYLNALSKDTFGKDLLELTSKNTLTFGEAMQDKSFSL  
MSKQRLKIFKDKAFS QIGNIL"

gene complement(18597..20420)  
/locus\_tag="JOBBOHMI\_00026"

CDS complement(18597..20420)  
/locus\_tag="JOBBOHMI\_00026"  
/inference="ab initio prediction:Prodigal:002006"  
/inference="similar to AA sequence:RefSeq:ASI88287.1"  
/codon\_start=1  
/transl\_table=11  
/product="IncP-type DNA transfer coupling protein TraG"  
/protein\_id="Prokka:JOBBOHMI\_00026"  
/translation="MKKQTNQTLVYILAITGILLAFITISQIATQYLAKSFNYSPLG  
ETLLYGFYNPFKWISWSYAYYSFYDPDFKFKFFMVMFAGIAFCFIVFILVKLAF LRKAK  
AIENLHGSAHWATLEEVKESGVFDKDKGVYIGGF EHKKTLHYLRHDGPEHVMLFAPTR  
SGKGVSLLLPTLLSWEESALIFDIK GELWALTAGWRQKYAKNKVLKLDPTCLDDSAVK"

FNILEEIRLETMHEIKDTQNIAINLIFKGETPPTNPTQGSTSYPKSEAGNFLVSIILY  
 ALHLKKYRGENTPNLTDIYKFINDPNQSIDELLEEMVECDISTMDKNTQEIIQSISRS  
 MKNKATQELSGVGTASEALNLYIDPILAKNTAKSDFKIKDLMNHESPISLYLIIPPG  
 QKDRLRPFNLLINQIFRTLDDSLNFKNGENVKRYKHKMLVLADELTMFGKLGVLEE  
 NLAYMAGYGMKFGYSIQDIQQLYSIYGEKETIISNCHIRIAFAPNKIETAKLLSEMGG  
 ITTIVKKSITSSGKRTAVMLGNVSETIQEVQRPLITADECMLPSAKKDKDDKIIAPG  
 DMLIFIAGQAPIYGKQILYFKDPAFLARSKVTLDKQVSDIL "

gene complement(20417..22630)  
 /locus\_tag="JOBBOHMI\_00027"

CDS complement(20417..22630)  
 /locus\_tag="JOBBOHMI\_00027"  
 /inference="ab initio prediction:Prodigal:002006"  
 /inference="similar to AA sequence:RefSeq:ASI88286.1"  
 /codon\_start=1  
 /transl\_table=11  
 /product="IncP-type DNA transfer primase TraC"  
 /protein\_id="Prokka:JOBBOHMI\_00027"  
 /translation="MKNKDFIQETADKIIESLKNGTAPWIKPWKGIDLANMPPYNPIT  
 NKPYNNGINSINLMLQNYNDPRWLTQYKQASINAQVRKGEKSTLIQYWQFSEMVDKLE  
 EGNVITNENGEVEQIEVKLENPKVFFAYVFNAEQIENMPKLEQKQIEIDNFQIIEKAQK  
 ILDDSKAIIHHKGNRAFYNANDTITLPLKENFLSEGAYTTALHELGHWSGHESRLN  
 RDLKNPFGSKEYAKEELRAEIASFLFNGKIGLDYDPGQHLSDYIDSWVQILEDKPNEIF  
 KATSDATKIVNFLESLSLEQKQKIELENSNTQNQALKQDKELNLATRKTYLYVPFEK  
 EFAKKAGAKWDKEAKMWAYPKGADLKNFTQWLNQSQLTQSYNNTHDEFKAFLEKYELN  
 IEGQPIMDGKLHRVSVIGDKGREKSGAYVGFNGHPAGFVQNYKTGIKENWKSANSLE  
 NTKNKEINLQNALEHNKALKEQRDKELNQAAYENTAVKLENEYNNARWANSEHPYLKEK  
 GFDKNFYLKQDKNGNLLIPLRDIEGKYWATQRIFANGDKMIGATRTAEEKEQGIYPA  
 KKQGNFFLLGAKNLNNVNEVYICEGFATSASVYEATKSPITMGVDAGNLEIIVTNIKE  
 KYPKMNIIIAGDNDVKELNGNKNVGKETALGIQKKYEVKVVLPNFTNQEAAQKGLSD  
 FNDLMKSRGLEEIKKQLKEQIAKQLMVEKATTKALDKNKGINKETAKKDIGISL "

gene complement(22635..22775)  
 /locus\_tag="JOBBOHMI\_00028"

CDS complement(22635..22775)  
 /locus\_tag="JOBBOHMI\_00028"  
 /inference="ab initio prediction:Prodigal:002006"  
 /codon\_start=1  
 /transl\_table=11  
 /product="hypothetical protein"  
 /protein\_id="Prokka:JOBBOHMI\_00028"  
 /translation="MKDFKELETIPNFSYEVDPHTAEELGAFKENALSEDDAKEGTED  
 QG"

gene complement(22762..23124)  
 /locus\_tag="JOBBOHMI\_00029"

CDS complement(22762..23124)  
 /locus\_tag="JOBBOHMI\_00029"  
 /inference="ab initio prediction:Prodigal:002006"  
 /inference="similar to AA sequence:RefSeq:ASI88284.1"  
 /codon\_start=1  
 /transl\_table=11  
 /product="Single-stranded DNA-binding protein"  
 /protein\_id="Prokka:JOBBOHMI\_00029"  
 /translation="MINNITIGGRLTADAELRHCNQGSIICFTFLANNRKYKEIENST  
 YIEVSLFGSFANAMHPYLKKGISVDVVGELTQDTWEHEGKIYSKHKRIKAKEIDFRTPK  
 KEKQTIPNIEEGENYEGF "

gene complement(23117..23218)  
/locus\_tag="JOBBOHMI\_00030"

CDS complement(23117..23218)  
/locus\_tag="JOBBOHMI\_00030"  
/inference="ab initio prediction:Prodigal:002006"  
/codon\_start=1  
/transl\_table=11  
/product="hypothetical protein"  
/protein\_id="Prokka:JOBBOHMI\_00030"  
/translation="MENENLEENKPTQFDDNEPSLFDNLEDEEQDND"

gene complement(23221..23766)  
/locus\_tag="JOBBOHMI\_00031"

CDS complement(23221..23766)  
/locus\_tag="JOBBOHMI\_00031"  
/inference="ab initio prediction:Prodigal:002006"  
/inference="similar to AA sequence:RefSeq:ASI88282.1"  
/codon\_start=1  
/transl\_table=11  
/product="T-DNA transferring Peptidoglycan hydrolase VirB1"  
/protein\_id="Prokka:JOBBOHMI\_00031"  
/translation="MIDIALIEQCKNPNVETQIIQKIIQVESNNQQFAININKVGSFI  
LKNKKEAENLANNFIKGGYSVDIGLMQFNNSNLKSSTFSHYSVEDLLDTCKNIKAGSD  
IFYLAYEMTNKLNKEDRINQALSIYNTGDLKKGFSNGYVAKYDSTAKTIDDLKAR  
KSDTRIKITYNLFNLQTQKKE"

gene complement(23759..25000)  
/locus\_tag="JOBBOHMI\_00032"

CDS complement(23759..25000)  
/locus\_tag="JOBBOHMI\_00032"  
/inference="ab initio prediction:Prodigal:002006"  
/inference="similar to AA sequence:RefSeq:ASI88281.1"  
/codon\_start=1  
/transl\_table=11  
/product="Conjugative transfer protein TrbI"  
/protein\_id="Prokka:JOBBOHMI\_00032"  
/translation="MLEVNMSPNKFLPKNNKRLSKVPIIIIFAIIAIVLFSIFYVALS  
RKQNLERQTAQTTPKEETQIATNHNNDLNLIDELQVQKAQENNIISPPMPNATQQPI  
QETNSQTTQQPPNNTPVLVQNNNAIDKEMKIKKDMQLKALLSNTKLDIKTEATDSKKN  
QAINFNPPNNNEDINLGAINPQNTGLGLESGTNKDVQGGQFLSQKKNQNGYLKYVKQKP  
LSTYEIKAGWNIPAILITGVNSDLPQGIQAQVTQNVYDSATGKYLILIPQGTKVVGAYS  
SNIIYGQSRLLVAWNKLIFPNGDTLNLGDMQGTSDQGYTGFEDQVDNHYFRIFGSFL  
LSSISAGIALSDNSDTNSEKETASDKAIAQAIQQMGQVASEMIRKNNMISPTLKIRPG  
YKFNIFVTKDIILEPLELND"

gene complement(25004..25447)  
/locus\_tag="JOBBOHMI\_00033"

CDS complement(25004..25447)  
/locus\_tag="JOBBOHMI\_00033"  
/inference="ab initio prediction:Prodigal:002006"  
/codon\_start=1  
/transl\_table=11  
/product="hypothetical protein"  
/protein\_id="Prokka:JOBBOHMI\_00033"  
/translation="MKILFLALIAFFITSCAKMNSDYFNSSFAVEETKINYNKIADDF  
SQFIISYYAPNKTTFFINEDKNNQDFSNFYINTLRKKGYAISNDNSKDLTFLSYQIS"



gene QIDNENIVAIFNINESKINVIYKIIENKLVKPNITSFNFTPCKTG"  
 complement(25444..26367)  
 /locus\_tag="JOBBOHMI\_00034"

CDS complement(25444..26367)  
 /locus\_tag="JOBBOHMI\_00034"  
 /inference="ab initio prediction:Prodigal:002006"  
 /codon\_start=1  
 /transl\_table=11  
 /product="hypothetical protein"  
 /protein\_id="Prokka:JOBBOHMI\_00034"  
 /translation="MKKIILLSSLIASSLIANLNERNDFSNLTPKEKKDLAIAQKWIN  
 SKTTTIQGNNGEVIFLFGESMPSIVTAPLRLTDIALEPGEVIKDVQIGDSIRWAVSLS  
 VSGEOPYLISHIIKPTDKNLQTTMNMINKRVYRLNLISEAKKFMPAVSFNYPNSII  
 KTLEDYKNQMKAKSESKNFYKTKDDEIPSNIENLDFGYSVEGNAPFKPLRIYNDGIKT  
 YIQMPKNLKFYEAPALMILDSSNEKQIVNYRLKYDTFIVDRLFNKAILLSNVGSKQEK  
 IKITKHSNKANQDIVNNVLYDLSLQNKKENK"

gene complement(26380..27075)  
 /locus\_tag="JOBBOHMI\_00035"

CDS complement(26380..27075)  
 /locus\_tag="JOBBOHMI\_00035"  
 /inference="ab initio prediction:Prodigal:002006"  
 /codon\_start=1  
 /transl\_table=11  
 /product="hypothetical protein"  
 /protein\_id="Prokka:JOBBOHMI\_00035"  
 /translation="MNIIFRQKQKIEKNEFDTSSNPYLNKTEWLERYGDIYITRAKNWQ  
 IVAMISLAICFVCVLFYIGYIGSQNKLIPIYVIEVDKLGNTAKVGMVQNIIDLNPNVIKY  
 SLNTFIYSWRSVWGNAETQRKIFDAYAYVEPRSKAFNYLNSEFQKNPFPARSTKENV  
 RVKIKNIVPQNIIDTWQVEWEEETTTLNEDILSKETYRGLIQIKQIIPNTEEQILKNPL  
 GIFITDINFAKIL"

gene complement(27095..28381)  
 /locus\_tag="JOBBOHMI\_00036"

CDS complement(27095..28381)  
 /locus\_tag="JOBBOHMI\_00036"  
 /inference="ab initio prediction:Prodigal:002006"  
 /inference="similar to AA sequence:RefSeq:ASI88318.1"  
 /codon\_start=1  
 /transl\_table=11  
 /product="IncP-type conjugative transfer protein TrbL"  
 /protein\_id="Prokka:JOBBOHMI\_00036"  
 /translation="MKLNKGIVLMQNGQLKQKIQVILKKGVNQTQTLLNGNKLAIIF  
 LIFLAPNLAFGAENAEGVLNIIRNGLLSWTPLIKTACLWVFWTLVIIDLVWTFGLKAL  
 SGFEFGEFLATLIKKIMYVGIFLFLFNIDQWLQIIFNSFSQLATNVNNGVSVSPNNII  
 AQALSIVIKIIRSMDFWSPGDSILKVIAGVIIILIAFVLMALDILLIVYLKFFLMNVIVF  
 FALALGGLNHFQIGLNPIMTAIKVGVELFMIQGLMALCINMIDTINNEITQNSSAEV  
 ILTILVTSVTFCLITKMVPGIIEAVFNIGSAGSAGAAAGFRAVATMAAGAAAGA AVGA  
 VGVTRAMNAKALHLAEGGAGGMDLVKGVAKNLASAGGEHLRDNLTKGRMPNQMANRL  
 QEKLKDIQGKTSEGGISSGSPKQENYQSGINPDAME"

ORIGIN

```

1  ttctccattt  ttttacattc  tgcaactcta  gcttttgctt  cctctaagtg  cgctttataa
61  taatcgcttg  tttttgcctc  atcgccacaa  cctgctaaaa  aagccaaagc  acctaaacca
121  attaatccgc  taaaaataaa  atgtttcatt  gtttttctcc  ttgatttaat  atagaacaaa
181  aatattttta  catcatttta  tttccattta  agagcgtctg  ggtttgattt  accccaagtt
241  ttttcaatat  aacctgtatc  ttctataaat  ttatctatct  ttgcctgctg  cattattcct

```

301 tgattatnttt gcgatgctaa ataattagta agcatattgc tttgatccat aatgaccgat  
361 cttagnttttc ttatctcatc aatctgataa gctaaaagat cattgggtggc ttgcacagcc  
421 tgcaaatnttc cattagaatt ttgtgaatntt tgcttaagtt ttgcgataag cgcatcttca  
481 ctttctaagt cttgatatcg aagctcgagt tgmtgcaatg ttccgntaaa tgtatntttgg  
541 tttgntttccg caatnttgctt gtatctatca gaataaatntt tatntttctc gctnttcattt  
601 gttgcgntttt caagatcatt actataacct tcaaaatctt tgtaagtatc ttcaaatttg  
661 cgcgaaacat tacctatatc ataagaaatt ccatttactt tgttcattac atnttcgggntt  
721 tgataaaagaa ccgnttcctaa gttatcccaa tcttctnttag ttaatctnttc taaattctgt  
781 tntttgcattt gcaccattntg tatnttgctgt tgcaattgag aatacattntg ctctgattntg  
841 tgaagnttgca ttgcataatc tntttacttga ttggcaatag cactaacatc aataacagga  
901 ataccacctg caaaggcatt atnttccgatg attaatgatg atattaagc taatgatagc  
961 tnttttactntt tnttgattaac tccaaaaata aaatgnttca tattagccct ttcactnttaa  
1021 aattaatntt tntgnttcgata tgagatnttat tatctnttata tnttttctgta atnttcatatg  
1081 caattaatntc ttcaaattca caattacgat tnttgnttcgnt ttgcataatc gctnttaataa  
1141 tatntttctntt ataaggtgtg ttaggaatct tatatnttatt ataatntttt agnttttggntg  
1201 tgtatntgatt tnttaataatt ctttccattt cattaaaagc attaatgaaa gcgattnttga  
1261 atnttatccgc tntttctacc gnttaatcca tagctataaa tgagaaaacca tctntttgtaa  
1321 gnttgatagta tggatatntt ctttctctac ctctaaaacc ctctatnttta cgggnttttaa  
1381 atgaaagccg aaaatntcggc tcacaaaaat tntttaatctc attatntgnta aatntttcac  
1441 caatcaatntc taaaatatgc ttatgnttntt taccaaaaac cttagccaca tctaaactntg  
1501 tgcaaaaaac tntgnttcgtct tntgntttcaa aaataactntc tntgattgntt atgnttgatta  
1561 tgctntgtatt gctcatatct actcctnttta gtaagtccag cattctnttag tgaatgntat  
1621 tnttttgataa tagtcataac aatntcctatc tccgcaagnt cgagaaatca tatactnttg  
1681 atcgtcagaa aggctnttcat aagctntgntg agnttataagc tntaattnttg cacttagntt  
1741 ccattctaa gaaatntgtaa atntcccctgt gcattnttat tnttggagntt tataatcggnt  
1801 ataagcatgg tntgattaatg cgtggcaaaa gnttaggcata tnttggattga tntctatagct  
1861 cataatntca aaagtagaat aactntctntt agnttctact tgcgtgntta aataatnttg  
1921 tntgntcattgc ctaggatcgc ttacagntaa tacatcatcg actaagnttat tntagcactaa  
1981 atctntctatg tnttgcgtcat tnttgntatagg gcataaatntt aaaaatgctc tntctntgatt  
2041 aatcgtnttcc caagntnttt taaatnttaat agaaaaatac cttgctaaag aagatgaaca  
2101 ctctgctcggg cgtgntgccac tactntaaaca taaaatntgcc tctcatgnta atnttntatc  
2161 gcctgnttaa atatcatcag caaaagcgtt actgntaatt aataaagntt cactntaaagc  
2221 taatntaatt tnttttacgc caaaaataaa atntttcata tnttntctct tnttntgaatta  
2281 tcaaatctntt tnttagnttat tntctntttct tctagccatt tataagccca atnttctntta  
2341 tnttttctcat aaagntntct tactctnttta acgnttactt tnttctnttat tnttntntgaag  
2401 gntaaatntag tntttccgag tntccaaatta aaaagntctag tntccgagntg agagntntaa  
2461 taatattctc tntttntgaat gntcattatntg ataatntctaa tnttgcacatc gntaagntca  
2521 aaaatnttat aaaagntcga agntagntaaa acatntttcac tntctntttt ataagnttgc  
2581 ggatntagnta aaaatatntt agntagntcaa tnttctntnta aaatatntaa aatntcactt  
2641 tnttgcactat cgtntaagct tnttnttagntc attataacgg ctacattntgc tnttctntaa  
2701 actnttaagcc aatntaactat tnttatctnta aacgcagntg gctnttaatgc aatntcaagct  
2761 tcatcaatnta tntagntaatntg agntactntca tnttaagcctt tntctatntgc atntgaaaatg  
2821 tagagntaagg cagntgattat gntatntgatct cntaaatntca tcaatntctc tntttcaaat  
2881 gntntgntaac tntctntaaact taatnttatct tntctcgtnt caaataaaaa accactntgtt  
2941 ccagaaatntg tataataatnt taaagcatct cntaaatcac tatctntntaa agntntataca  
3001 aatntcagntca aagagntnta atnttntatntg atatntgaaaa tntaagntctc atntntaat  
3061 tntttntntgnt tntgntntaant atnttacatntt tntntaattnta agcatnttntc aatntcaaat  
3121 tntagcccatg cgtnttntcggc atctgntnttntg atatnttgntca aagntagntaaa agntcaaatg  
3181 gaatntatctc ctntccacatc ataatntaant ccactntntg ccagntntcgg agnttagntaa  
3241 cttntgntctt tatcaaatntc gntaaatntta gcatntntgnt atnttntgntca agntcaaaaa  
3301 atatnttgntca aaagagntnta tnttaccactc ccagntagntc cntaaatntaa agntntntctc  
3361 aatntcgtntaa catntntaant taacctntaaa gntcgtatntc cagaagnttac aactntgatt  
3421 aatgntgntgag aatnttntgagnt aaatctnttca cntntaantnt atnttatntcc cgntcaaatnt  
3481 gacntcaaatg gaatntaaatg tntntaagntta agntntatnta atatntgntc gntntaantnt

3541 ggatatacga atccaggtaa agttcctaaa tacgcttcta ctgaattgat tgtttcggtt  
3601 cttgatagaa agcctaaatt ttctaaaact tttcttacat cttttaatft atattcctaag  
3661 ctctcataat ctctatcaaa aacgacaata tttgcggtat aatagccata tcctatcata  
3721 ccgctttttg attctgataa tgcagaatct agttcttgca ccattaacac agcatgatca  
3781 tcttgttttc ttgcagggcg atctagtaac tgatcaagcc aaccttttgt tttttgttgc  
3841 ctttttttac gatatttatt aagtgaatft tgagcttcaa agtctgctaa aaatataaat  
3901 ctagtgttga atctgtaatc gaaattaagc tctgtgagtg catttaagat atttggataa  
3961 ctttcgcttg gaaagccctc aatagcaata attcctatac attgattatc aattcttggg  
4021 tgcattcctg tttcgaaatg ccttccacc aataaacaat caagaaacat aggggcattt  
4081 ggtagtatta tttttgtct ctcaccacaa atacaaaaat taatatattc aagcatatca  
4141 tctaaaatat actcattatt atattcgtca atagctattc ttggtagcat tctttcgatt  
4201 tttatataat tgcttaaact atcttcta at ttttgaaggg tgtttttaa atactcta at  
4261 attttatcac cctgatfttt gttttttgtt tctgcaatta tcatcaaatc ggtgatftta  
4321 tttatgcttt tgtgcggtgg aaggtaagtg aaaatcattg taaaaagatt ttcaaatgt  
4381 tctacattgt caaaataatg ttttctttca ttttcaagaa tttgtgcaat attgtttta  
4441 taaaaagtat cgccgtcaat gtagtftttc gtttttatcc tagagcaatc aatatgcacc  
4501 gccagccat tacctagagt ttttaaaaca ctattaatcc tagcacttaa agtatttctt  
4561 tcatttattg tcatggaact gatatcccct gcacgataat aaaaaccagc tgttaaactt  
4621 ccgtctttgt tgagcaaaat gccttcatcg ataaaacttg catagtttag aatatcgga  
4681 aatgcttttg ctttgcttct gaattcttta agtgctagca tttttaatc ctttgaaaat  
4741 ggtgtgcttt gcgcataata aaatftttta ttttaatft ggcgcaaaaa ttttgtctc  
4801 ataagcggat cgctfttttg cattaatctt aaaagcatgt tgcagaaaaa aaataagaat  
4861 atacctataa tgcttgtaag gagcgttgca cctgtaaaga ttagtgcaaa tgaaatcact  
4921 ccaaccataa gaataagctc tcatctgctg caaatatta aatttggftt gttgagggcg  
4981 ctataaatat ctattctttg caattcttcc attagattaa tgctccactt gttgaaaaa  
5041 gcgacataaa gctgftttgc cctactatta atgctattac aattacgata taaaagaggg  
5101 ttttaataaa accgctaaat tcattgccc aaatftaacc tgctccagct ccaatgattg  
5161 ctagaattga aataacaaag gctacaggac cacttaagct cgctfttaatt tgttcta atg  
5221 gacctcca aggcaaaccc gctccagttg ttgaggctaa agcatatcct aatccaacg  
5281 ccaaaaataa aatftaaaat tttttcattt aaactcctta aattgcttgt gtaatgtatt  
5341 tgtcgttctc ataaccaatt actftttatga tttcctttac ttttctacc tccttgcttt  
5401 ttgagataaa aacaatftaa ttcacagctt cagcaatfta tttgctcatc tttgcatttg  
5461 ttgcttcaga gattaattgc tccattcttg tgagtcctc atttgctgga ttagcgtgga  
5521 ttgtagctat tcctccaggg tgtcctgtat tccaagcttt tagcaagtct aaagcttctt  
5581 tgctcttgt ttcgcccact ataattctat cggggcgaag tgcattgtg gctttcaaaa  
5641 gcctaagcat atccactfta tccgtagccc ttaaaattac tttgttttca ctgcacatt  
5701 gaagtctgc tgtgtcttca atgattacta ttctgtgatt gggagtgatt ttagaaatgc  
5761 cgtcaaatat ggcatttgaa aaagtggftt taccactacc agttccgcct acaactaaa  
5821 tttttggcg ttcgataatg gcattaatca aaacttctt ttgatttgggt gtaataatat  
5881 tagaatctac ataatcaca agagtaaaga ttttgacagc ttttttctg attgtaaagg  
5941 ttggttttg gacgattggt ggcaataaag cttcaaacct tgatccatca agtggcaatt  
6001 cacattctaa tataggatta tctgcatttg tagttgtatc aaggagggt a gagattgctg  
6061 taatgataga ttttgctcta gcttctgaaa attcgccaag acatatcata tcttgacct  
6121 gcttttcaag ccaaagtttg ccgtctgaat ttagcataag ctctattgtt tctttatctt  
6181 ctaaatgagt taaaatatcg ccaaattctc tttttatftt ttcattgatc cgtgcttgaa  
6241 actcaagatt actcattgaa gagtctftt gattcaattg caagagftaa aaatttgtca  
6301 ggattftttt tgtatagatt gtggagttgt aaaagftta aaatftaata agtfttaaga  
6361 ttattctgct ctctctctct ctctctctct agctatftaag caaaaatfta gtttattftt  
6421 tctcaaaaaa ttctcaaaa atftaaaact aatatcgtta ttatattatt ttaaatfta  
6481 ttgtcaagat ttttttctaa aaaaatgata cttttftaat atttgaatgt ttattftttt  
6541 ctttttttg gaaaaataa acattftfta taaaaatft tctattftgt ttcattfttt  
6601 ttgagacaaa atatagattt tttgctfttg tcccaaaata tgatacattt ttaacatttg  
6661 aatgfttatt tttttcattt ttttgagaca aaatacaatt tftaattftt gtgtcataa  
6721 attatcaaaa atgaaatcaa ttgaaataa acggactaa attatgaaac aaaaatgaat

6781 tttaaattatt cttatttttaa aaagtttgat cgtttaatat ttttggataa cctaattcctt  
6841 ccgatcatata cttttcaaat ccttcaatat ctaaagcatt atataatcta ataaccttgt  
6901 aattggtttt ttgttgaatt agatcatctt ctgctgttaa attatctgta taactaatag  
6961 tattatctaa catcattttt cttgtagaac ctcctattag ataaaatata atttcatctg  
7021 cctttacat ttgatttttc gtggtttcaa acaatacaca agcaaagaag tctttatcca  
7081 tttcattagg tttgtaaaga ttatcgtatt tgcataatggt cttaaaatta tattttgcat  
7141 tgcataatgca aaaattaatg ccatttcttg gaaaagagga acgaacctct aatgttttac  
7201 cattgtttta caataaatct atttgcccta tcgatgattt aaattctgta aaattaacaa  
7261 tatctccaaa atttcttttt atatatgtaa accaaccata ttcggccaaa attcccccta  
7321 aagcatctaa aatcagcctt tctttatctc tttgtgatgt gctatcgttt gctttaagtg  
7381 gatttacttg ttttgctaag tcccaagcct gttgataata ttttgaagct tcatcagttt  
7441 tattttttaa aatacatcta attactttgt atgttctttt tatattcatt gtattgtttg  
7501 gtttttgaca gtttattatt tcataattaa atagcattat taacaccctt atgttttata  
7561 aaaattctag agtatagtct ttttccattt atatacgctc tatcggtttt tccattccag  
7621 tcatttcggt taatataaat aagctctcca ctgtttactt gataatctgc cccaataatt  
7681 tcaaattggt gtggattgta tttatctaaa aatgtaatag gaactcccat tattccagta  
7741 taatctgaag gtatatcttt ggactttgaa atttcaatag cattgtaatt atcatatgta  
7801 atataatctt gattattata ttttctattt aaagatattt ttttatttcg tttttggtta  
7861 ttaatatttg aaaacaaaa agatcttgct ccctctacca attctccttt tgtgtttata  
7921 aaccatctaa cgcaattttg tcctaaccat aatttatttt tcatcatata gttgaaacaa  
7981 tttttataag aaattgcatt agcatttcct ataatacaaaa aatctttttg attagatata  
8041 agcatatcta taaattccct aaatagttaa aatggtggat ttgttacgat tatattagat  
8101 tcttttagca atttaattgt ttcacatcgtt ctaaaatcac cgttattttc taacaaacct  
8161 tgatattttg gcttattttt ttctataata aaaattttac cttaccatt actattaat  
8221 gaagtactaa ttaatttttt tagttttaat ctatcaaaa ttaattttaa aaattttgta  
8281 aaattacttt tttgtggatc atcgcaatta caataaacta tcctatcttt aaacgcattt  
8341 ttataaaaa ttaattcttt atttatatct tcatattgtg tataaaattc atcgtttttt  
8401 atattttttg cattatttaa tttagaacta ctgtttttat tcatttatac ttaaccttct  
8461 atataattaa atatcaatct cgccatatct ttttataggt attttcaaat ttggaaaatt  
8521 tttatccatg gtataaatag cactgcaacc ttctttttcg gcacaaaaat attgcaaata  
8581 gtcttcaaag tctcctcgat atttatcata ataatacaaa gccatattaa tgacacttac  
8641 accaaaagaa gtgatattaa aatttttttc taatgaaata tcttttaaga aatgagttaa  
8701 attattttaa ttttcttttt tgataagata agcaatggta gaaatcatat cttcagagaa  
8761 aacaatttga atattgtttg tgagtaaata atacattaat tgttttagctt cattatgata  
8821 ggttctttca gtattgaaat aatctagaaa aatatttgta tctaaataaa cttttttcat  
8881 attctacctt cttctaaatc tttatccaat aactctcttt tcatttcttt tgctgatttt  
8941 gtagaatcgt atgcaccagt aagtatccca gcatattttt ctataaatag tctagcttct  
9001 tgttcttttt gattttcatc aaataaagaa ggttgtgtat cattagagat taagactttt  
9061 ttatttatgc tcggctcttc ttttttatcg aagctatatt gattgtttat agagttattt  
9121 ttttcttcaa taacaatttc tgtatttttt acttttagtcg tttcatcatg ctcttgattt  
9181 atttctttta cttgatattg cttttgattg tttcttattt catcaaagcc tagatattct  
9241 tcttctattt ctaaattttc tctaacttct aaattttcaa aatcccattc tctcgtaatg  
9301 gtatgtctta aattttttta atcattccaa gatccgcgct ctactaaatt tggattaaat  
9361 aaataacaat catcgctacc aacaccagca tatgatttta caaattctct atttatttta  
9421 aaaatcactt tcttttctat caaccattt aaagctctat acattccagc cctgctttaa  
9481 actttatcta aaacgatatt ttgcttcata gatttatcaa acctcacaac atttttataa  
9541 tctactgaag aaagcaaagt aaaaaataaa gttttttctt gagattctaa attgataata  
9601 taatcaatat tttcagtaaa aagtttaata aaactttctt ttgtttgaac ttttttaaca  
9661 ataatttgat ttctttctac aacttcacca gtaatataat cagtagatag attatctttt  
9721 ctataaacta cttgccgttt gttattttta ttaatctcat ttaaatcttt aatttctatt  
9781 tcattgctca tattttatcc ttactgaatt tataaaatat tgtatcataa tttgagacaa  
9841 aaagcaataa atattttata aaatataaaa tattgtacca taatttgaga caaagtaact  
9901 ttaatctgtc tcactgatga gctaacttgt ctacaggtg agacgctttg tctcactgat  
9961 gagacagatt aaaagtgcct caaagcacta taaaatagac atttgaaagc atttttaatt

10021 aaactatctc ttctatatct attccttacia attcaaactc taatTTTTTTa cagcaaattt  
10081 cgctaacgct catttgcaaa tttgaagaga ctatgcgtct cttactcttc ttacaacaat  
10141 agggcggggt caagttcggt tgtcgcctca ggcgactgca caccgccac cccatatcta  
10201 cgcaattat agcacctact taggtgcaat ttgctatata caccaaaaaat aaaatattta  
10261 gtttgaaaat tctacttttc aaattaagtt taattgtttt gaatatcgat aatataggct  
10321 ttttataaat aaaaatattt ctttttaagt ttagagtatt tttctttgaa acttaaagta  
10381 atggtaaaat aggaatttaa ttatttaagt ttttgatttt cttaaaaaat taatttgtat  
10441 agatttagat aaggtaaagt tatattttat tggaattagt gtataatatt gtttaataata  
10501 aaaatTTTTa aaaggtaaaa aaatgaataa agataaaaaa tatttaaatt tttctgaata  
10561 ttatgagggt agggattttt tagagcttta ccctgaaaaa gatagagaaa atatagagaa  
10621 tattttaata acgataggcg aaaataaaaa gtcaaaaaat ttatcttttg aatttttata  
10681 cgattttttt aaaaaattag gttttgaaaa aaagttgata tagatgattt gttataacaa  
10741 atcatcttcc ttgatatctt ttccaaattt agcgtcaaat actttttttg gttttgtgtt  
10801 aatcttttagc ttgatagggt ctttattttt cagaactaaa gattgaagtt gattatcttc  
10861 ttgcattggt tcttttatct tgattttggt tttaaattca tcattgaaat atttattgaa  
10921 ttgtttataa gtcattttaa agtttttttc ttttaaagcc ttatcataaa gaaatttaga  
10981 tactacacag ccattttcaa attcctttttt taaatagttt atatttgaat aaaattcgat  
11041 tttagcttca cctctttgca ttatataatc tttcttaaat agatttttct aatatcataa  
11101 attcatattg gtttgttttt tcttttttag ataattcttg gtagcctaaa tgtttaaaaa  
11161 ttttaatagc ttgctgggaa tagtttatat cacatctagc aattatttta ttgttgggaa  
11221 taagtttttc ataataattt ataaaaattg tagctaactt tttgtttcta aatttttcca  
11281 agatatagat catatttatt tcatatataat ttgatccttt gctttttcca caaaatgcga  
11341 aacctgcttt ttcatttgta ccattcttaa taataaaaaat tcctcctgat acaccattat  
11401 tttttattat atcttctaatt ttttcaataa atcttacatt gtaaaaaatgt ttttctttga  
11461 atcctagcaa aaaacaatat tttataaatt ctatatcttc aaatgttgca atttttatat  
11521 ccatgattgt tctcctatat tctatttgta ttttttcatt ataggatatt ttaggttaat  
11581 ttgagtttat ttaggttatt ttaggtaaag ttaattttat tacaatagaa ttacctaaat  
11641 ttagttataa ttacttggag taataagaca ggatatgcaa atgtcgaaca tttgcaaagt  
11701 tttatcgcta aagctctaaa ataaggacgc caaatgagaa aagataaaaag aatagcaata  
11761 agattatctg aagatgagta taaacatata atgcaaaaag cgcaaaatca cggcttaacg  
11821 atttcaagat atttgcgtga tttatcgatg aattatccta ttacttgcac agtagatcaa  
11881 aaagtcgcac ataatgtttt aaacattgct ggagatatag gaagattagg cggacttttt  
11941 aaacattggt tggttagaaa cgaagataat aaagtcaatt tttcaaacaa aagaacttat  
12001 aatgatattg atgagattgt agatcaaat ttagatttac aaatactttt aaaagaacaa  
12061 gccaaaagga taatacaaaa tgataatcaa aaagattcca agcaaaaagc agaataaatc  
12121 aagttttaaa aatttatcaa actatatttt agacaaagac aataataatg caaaagtatt  
12181 gggtgattat atgcttgata aaaacaatga aatggataaa gtggaagggt atcattttac  
12241 aaattgttct tttgataacg atgaagataa tattaatgag attatcaata ctcaaaagct  
12301 taataccaca acaaaaacag ataaaacctt gcatttagta gtttcttttc aagaagatga  
12361 aaaccctact ttagaaattt tacaagcaat tgaagaagaa atcgaaaagt ctttaggaat  
12421 ggaagatcat caaagattaa cgtgtggttca ttccaacaca aataatcttc acatacatat  
12481 tgcaattaat aaagttaatc cgcatacact aaaagttatt aatccttaca atgatgttag  
12541 aattttacia gaaacagcga tgaacttga aaagaaatata aatttgaagc tagacaatca  
12601 tatttcacia aaagataagc aaagtaataa atataatacc cacactatga attgtaattt  
12661 tgaaacctgg gtaaaagaaa agctttctaa acaagtagat cttatgttaa aagatgaaaa  
12721 aactactttt aaagatatta aacaattttt agctgaatat gatcttgaat ttagagaaaag  
12781 aagaaaagggt tttgttattg cttctaaaag tgaaaaatta ttttgtaagg caagtagtat  
12841 tcacaggggg ttgtctaaac aagctttaga gaaaagattt aaagaattag atttaaaaca  
12901 agaaaaagaa aatacgaaaa atattaaaga agaaaaacac gaaataaaaag aacaatatca  
12961 gcgaccaaata aaagaaactt ctaaaacatt atgggaaaag tatttaagaa ttgaaaatga  
13021 gaaaaaagca gagcttgaca aagaacttag aatgttaaag cttaggcgaa atgaatttaa  
13081 aacttcaata ccatcaatga aatttaataa aaataccttt gcacatgtta aaaaccaaag  
13141 aatgattttt aaaaataaac aaaaagagct ttatcaaaaa tataaaagag tgtcttatag  
13201 agatttttta attagtgaat ccttatcagg aaacgaagag gctacaaggg ctttgcgaag

13261 aactaaaacg aaaatcaatg aaaatgaaaa tactctatca tcaaccaggg aaaaacctaa  
13321 aatatttgaa aatgtagatt atataacaaa agaaggttat gctgtatata aaagcggttt  
13381 taataaagcc atagataaag gagaaatgct aaaagtatct cttattaata ataaagacga  
13441 taaagaatth cttttaaatt ctttgcttat agcaattgat agattcggaa atcatcttaa  
13501 tattacagga gatgataaat ttaaaagaaa tatttttagaa gtcgcaaatg attataatth  
13561 aaatgtaagt ttttcagatc agagaatgca aaagatacaa gaagaaaaca acaacaagcg  
13621 taaagaaatg aaaactagaa aggttttaaa aaatattatt gaattaaaaa tcaaaactcac  
13681 agaacaggat aaagatatag atgaaaatat taaagaaaaa gaattgaaag ctttaaaatt  
13741 ttcacttaaa aaaatatcaa actctacacc ttcaatattt aaaggcgagc tgaaaaaatt  
13801 aggcttttagc tataaagaaa tagattccat ggatactgaa agtgtttgta ttgaaattga  
13861 cggcttttatt gtaaattctg ccaataaaga aggacttgtc gcaatgaaatg aagaaattaa  
13921 acaaaccttg atcgatgatg aagagataaa aaggtttgaa aaatttgaac atthtattth  
13981 aaataactaat aaaataacag atattgcaa gggattttat acaaatagaa aaattgatgc  
14041 tgatgagtat ataaaaagat tttcaatgca agaaagcaaa attaataagg tggcaaacgc  
14101 tatttctatg ttaagcgata agaatttga cataatggaa aagtatgcaa aaaaacttga  
14161 aaaagattta aaatatcaat acttgaaaaa ggtggaagtc tttgcaagta atgatattga  
14221 tttgaataat ttttaagggt tgagattata tttctcaacc acatctttaa tattgatata  
14281 tttgtctaac atattatcat tttttagtat tttataaatc tttaatagtt tatttttgta  
14341 ttcatttaaa aatgttttt ttgtgaaaca tttttctaac acatataagc agattaaatt  
14401 tagtgttttg taatattctt ctcttttttt attcagcaaa ttgttatttt tttcatctaa  
14461 ttggtttttt tctaaatcta agtgttctat gtaatcaaca aaattttttt ccgctgtaga  
14521 aattttttca aaagcatcaa attcagtttt taaaatatta attctattat ttttagagct  
14581 atttcttaat tgcaacaag caattattag tccaatgact acaccaatgg aagccaatcc  
14641 ttgtattaat ttgatgataa tattaatata atcggcattg tctattaaat attgcatgta  
14701 ttactttttg tcaactctgat ttgaattagt ttgattctga tttgaaatg tttgattctg  
14761 atttgaatta gtttgattct gattatatgc agtttgcat ttataggata aatctaaggc  
14821 agcaaaaact ctttgatcat cataactttc gttgcaaatt tttaaatttt caacattata  
14881 ttcttgattt ttcataaaaa atactcctag tatcaaaatt aatataatttt gtgattttaa  
14941 ttatacctaa tcttttctaa aaatttttaa tcttacataa gaatttaagc ttaagccat  
15001 tgaatgagcc tcttgattta aaatttggtg tcttcttct gtaaaattta tcataagctt  
15061 tttatttctt tttgcatttc ctgtttttgc atttcctggt tctccacgag cagaattaac  
15121 aaaattattt tcatthtttg gtgcttctga acttagtttt ttaaattcca ttattatact  
15181 cctaattttt catttgctat ttttaaaagt tcttggtaaa agttttcaaa gtcatttaaa  
15241 gctttgtcgt ttttatcgca aaattctttc atgcttttac ctctattac tgctttgcga  
15301 taagcttgct tttcatagat tacgctttca agcattatta ctctatctaa gcccttttct  
15361 tttttagctt cgttaatgta tttttttaa ttttctaatt cttttgctaa aaaaggatta  
15421 ggtgaaacc tattgactaa aaccaaagcc aataaattag gattaatttc aatcacttca  
15481 ttataaattt ctagcatatg atctagcaca ttaacatcgt attgacttgg aattgtagga  
15541 atgataatga tatttgatga aagtatagct tttcgcattt ctttactatc cctaccgct  
15601 gtatcaacta taatgctatc aaaagcattt ttcattcttt taatctcatc gcctaaacta  
15661 atgcctgtht tcgaaacatt tgaataaaa ggctctaaat ttgattgact tctcatatcc  
15721 gaaaaaactt cagtcgattt ttgcggatct gcgtcaataa gtaaaacatt gtctccatct  
15781 tcggctaadc ttgcggaaag atttactgct aatgtagttt taccactccc gcctttttca  
15841 tttactatgg atataatcat aataaaacct tgtttttagt ttaaattaaa ataatatcat  
15901 aataatatca taataatatt aatacaatat taaaagaata ataaaataat attatattat  
15961 gataacctag attaaaccaa caagaagaaa aataatttgg ctagcaatag cgataatcca  
16021 aaaattaata tttgtatttt tcttttcttt ggtgtcttct gtttttctt gtgatgcctt  
16081 aattgtgtht tgatttgctt gtgcttgat taaaatatct tttaaagctt cttgattggt  
16141 tttgctatat tctcttattt cattcaatat attgaattta tagctttcta aatctgtht  
16201 gtgthttata aagagtagat ctattttttc taaaaaatca tcaaagataa tttcatttgc  
16261 actaacgact gcaagtatag gatcattttc atctaagatt atatggtgct tttttgcaat  
16321 ttcttcaata agttctthtt tattcatttt atthttctt ttatgatatt atthtgat  
16381 taaataatta atattthaat atttatattaa tattaaaacg atatcatcaa ttttaacttht  
16441 tttacttcat tttggagtat attaacaact ccaaaatacc tactatcata actthttata

16501 ttttcaccca ttacaaaaag ttcattttct ttttaatttg gtttaaaagg ttttaattct  
16561 agtaaattac cttcgctatc aaatgaaaa attttagaat taggcaaaag actttcatta  
16621 ataaaaacac cttgctgatt aacttctaca aaatcgccat ttactgcat aatctttttt  
16681 aataaaattt ctttcttttg tggatTTTTT aaaagcacia tatcgttttt gttaaaagtg  
16741 gaagagttaa tctctttgta taatcctaaa ggcatcgatc ttgtataatt aaaatgaaaa  
16801 ccgcaaaaat aaaaaataag atatgagagt atagaaagaa aagcaaaaga aaaggcaaat  
16861 attgcaatag tttttctcat agcattacaa tgatattcct ttattttgct ctaaacttaa  
16921 gttttgtcta aagcttttta gattggTTTT aattatggct tcaagTTTT ctaatttcaa  
16981 ttgtgaagct tctacagatg ccattatcgt tttatctttt ggtattaaat ttaaactcaag  
17041 tttataacct gcatttttag ccaactcatt taaaaatatt ctttgagttc tgccgttacc  
17101 ttctctaaag ggggtgcaag catttagatt tctagcaaat tccggctaagt tctttgcgaa  
17161 atcgttaaag tcttttgaat tttttaagta attgtcttct ttaagccaag taaaaatttg  
17221 ttgagcgggt gcattttaat cttttccagg aacaaaatta gtaattgttc catttgggtgc  
17281 atattttcca aaatttccat gcaagcctac ttccattcta tcttttccag cccagtgaag  
17341 tacatcttga aaaatatggt tatgtatatt ttttaagtgc tgataatcga aattgccttt  
17401 aatgggactt gtaatcaatt cgtcaattct ttgtgaagta tttttctcg attctttatc  
17461 aaataatttt tcatctttta taccgagttt attatctgta attaactttt taaaagttc  
17521 ttcattgctt tctttcatat tctacaaatc cttttcttg atattcagcg ataatttcat  
17581 cagcgttaa accatataca ttttttttaa ctaacataat aatatctaac tcgttaaggt  
17641 aatgctttc aatagcgtga gttcctatgt ttgattttaat attctcgtat tgctctttgg  
17701 ttacatcatc tttatatttt ttaagtattg caaggctttc ttctaagcta tgcacttcgg  
17761 gatattgttt ttgcattttt actcctttat aaaaaatata attatattat aataatatta  
17821 aaatagaatt aaattaatat cataatgata tcataatgat attaatttat aatatattac  
17881 ctatttgact aaacgcttta tctttgaaa ttttaagcct ttgttttgac attagagaaa  
17941 agcttttatc ttgcatagct tcacaaaag ttaaattctt tgaagtgagt tctaaaagat  
18001 ctttgccgaa agtatcttta cttaaagcat taagatagac aatagctttg attttttctt  
18061 tgatagcttg atactcttta gtttcttcaa attctaaatt atctttgata attgatccgt  
18121 gatattcatt aatccacacc acaaaagaac aattaaagc ttctgttagt tgtgttaatc  
18181 ccaaatgggt atcatctctt gcttgaccac ctacaattgg aacatgcata taaacttcta  
18241 aattattggt tgttaaaaag tctaaaacct cattttcttt aagataatca attaaaggta  
18301 taaaagtagt cgcaccgcta tcaataatat agttttcagc ctttttttca aaagctaatt  
18361 ctacaatttt atcaaaagca cggacatcaa atttgccatc atcatcaata agttgcaaga  
18421 atttagcttt taaggctttt acattaagta aagttgtatt attaggatcg gtatcaatag  
18481 cgactatact ttctccttta tctaaaaaat attgacatag taaagagctt ataaagcttt  
18541 ttcctatacc acctttacca tttaaaacaa aatgtatttt tgccattttt actcctttat  
18601 aaaatatcgc tgacttgttt atctagtgtt acttttgatc ttgctaaaaa tgcgggatct  
18661 ttaaagtata aaatttgttt tccataaata ggtgcttgac ctgctataaa aattaacata  
18721 tcaccaggag cgattatctt gtcactttta tcttttttag ctgaaggcaa tgcatacac  
18781 tcatcagcag taattaaagg gcggtgcact tcttgtatag tttcactaac attgccaagc  
18841 attacagcgg ttctttttcc agagcttgtg atagattttt taacaatagt tgtgattccg  
18901 cccatttcag ataagagttt tgcagtttcg attttatttg gtgcaaatgc tattcttatg  
18961 tggcagttcg aaataattgt ttctttttcg ccataaatag aataaagctg ttgtatatct  
19021 tggatcgacc cgtaaaactt cattccatat cctgccatat aagcaagatt ttcttcaagc  
19081 actcctaatt ttccaaacat agttagctca tcagctaaga ctagcatttt atgtttatac  
19141 cttttcacat tttctccatt tttaaaattt agagaatcat cagttaaagt tctaaaaatt  
19201 tgattaatga gtaaattaaa aaatggacgc aacctatctt tttgccctgg cggaatgatt  
19261 aaataaagac tgatagggct ttcatgattc attaaatctt tgattttaaa atcgtttttt  
19321 gctgtatttt ttgctaagat aggatcaata taaagattta aagcttccga agctgttctt  
19381 actacaccgc ttaattcttg tgtggcttta ttttctattg atcttgaaat gctttgaata  
19441 atttcttgtg tatttttatc cattgtagaa atatcacatt caaccatttc ttctaatagc  
19501 tcatcgatac tttgatttgg atcgtttaata aatttataaa tatcggttag atttggggta  
19561 ttttcgcctc gatatttttt taagtgtaaa gcataaagta taattgaaac taagaaattt  
19621 cccgcctcac ttttaaaata agatgtgcta ccttgagtgg gattggtagg gggcgtttcg  
19681 cttttgaaaa tgagattaat tgcaatattt tgagtgtctt taatctcgtg cattgtttct

19741 agtcttattt cttctaaaat attaaatttt acggcactat catctaaaca agtcggatct  
19801 aattttaata ctttattttt ggcgtatttt tgtcgccaac ccgcagttaa agcccatagc  
19861 tcacctttta tatcaaaaat aagtgcagac tcttcccagg ataaaagtgt aggtaaaagt  
19921 aagcttacgc ctttaccgct tcttgtaggt gcaaaaagca ttacatgttc aggaccatca  
19981 tgtcgtaaat aatgaagtgt ttttttgtgt tcaaaaaccac cgatatacac gcctttatct  
20041 ttatcaaaata cgccactttc ttttaacttct tctaaagtag cccaatgtgc tgatccatga  
20101 agatttttcta ttgcttttgc cttacgcaaa aaggcaagtt tcaccaaaat aaaaacaata  
20161 aaacaaaatg caatacctgc aaacattacc atgaagaatt ttttgaaaaa atcaggataa  
20221 aaagaataat aagcataact ccaagaaatc cacttaaaag gattataaaa tccataaagt  
20281 aaagtttcgc ctaaactagg agagtaatta aaagattttg ccaaatattg tgttgcaatt  
20341 tggcttattg tgataaacgc tagtaagata ccagttattg ccaatatata aactaaagtt  
20401 tgattggttt gttttttcat aaagaaatcc ctatatcttt tttggctggt atctctttat  
20461 tgataccttt atttttatct agcgcttttag tagtggcttt ttcaaccatt agttgctttg  
20521 caatttgttc ttttaattgc tttttaattt cttccaatcc tctgcttttc attaaatcat  
20581 taaaatcact taaacctttt tgcgcttctt gatttgtaaa atttggcaat acaactttta  
20641 cttcgggata ttttttttgt atgcctaagg ctgtttcttt gcctacattc ttattgccgt  
20701 ttaattcttt ttttaccatca ttatcccctg caataatgat attcatttta gggatttttt  
20761 cttttatatt tgttacgata atttctaaat ttccagcatc tactcccatt atagtaggag  
20821 atttttagtc ttcatagaca ctagcacttg tgcgaaatcc ttcacaaata taaacttcat  
20881 tgacattatt taaattcttt gcaccaagta agaaaaaatt accttgcttt ttcgcagggt  
20941 attctatgcc ttgctctttt tcttctgctg tgcgtgtagc tcctatcatt ttatcccat  
21001 tagcgaagat tctttgcgta gcccaatatt tgccttcaat atctcttaaa ggaatcaata  
21061 agttgccgtt tttgtcttgt ttgagataaa aatttttctc aaagcctttt tcttttaaat  
21121 acgggtgttc tgaattagcc catcttgcac tgttgattc attttctaat ttcacagcgg  
21181 tattttcata cgcttgattt aattctttat ctctttgctc ttttaaggct ttattatggt  
21241 ctaaagcgtt ttgcagattt atttctttat ttttgggtgt ttccaaagaa ttagcacttt  
21301 tccaattttc tttaatgcc a gttttgtaat tttgcacaaa tcctgcaggg tgtccattta  
21361 aaaaacctac ataagctccg cttttttctc tccctttatc ccctataacg ctaactctat  
21421 gaagtttgcc gtccattata ggctgacctt caatattaag ctcatatttt tctaaaaaag  
21481 ctttaaattc atcatgagta ttgttgtaac tttgtgttaa ttgtgattga tttagccatt  
21541 gagtgaaatt ttttaaatcc gcacccttag gagcatacca ctttttagct tctttatccc  
21601 attttgcacc tgctttttta gcaaattctt tttcctcgaa aggaacatat aagtaagttt  
21661 ttctagttgc caagtttaac tccttatctt gtttaagcgc ttgattttga gtatttgaat  
21721 tttcaagctc tttttttgt ttttgcctca aagaaagact ttcaagaaaa ttaacaattt  
21781 tggtagcgtc tgaagtggct ttaaaaattt catttggctt atcttctaaa atttgcacc  
21841 aactatcaat atatgataag tgttgcctg gatcataatc taagcctatt ttaccattaa  
21901 atagaaaact tgcaatttcg gctcttaatt cttctttggc gtattcttta gaacaaaag  
21961 ggttttttaa atctctattt aatcgacttt catgaccgct ccaatgtcct aattcatgta  
22021 aagcagttgt atagtaagcg cttcactta aaaaattttc tttcaggggt agtgtaatag  
22081 tatcatttgc ggcattataa aaagctctat ttcctttgtg atgaataatt gcttttgaat  
22141 catctaaaat ttttgcgct tctttaatta tttgaaaatt atcaatctct tgcttttgc  
22201 ccaattttgg catattttcg atttgctcgg cattaanaac ataagcgaat aatactttag  
22261 gattctctaa ttttacttgc atttgttcta cttctccgtt ttcatttgta ataacattac  
22321 cttcctcatc taatttatca accatttgcg taaattgcca atattgaatc aaagtcgatt  
22381 tttcaccttt tctaacttgt gcattaatac tttgtgcttg tttataagta agccacctag  
22441 gatcattata atttttagtc attaaattaa tgctatttat gccgttataa ggcttatttg  
22501 taatcgggtt ataaggcata ttgttagcta gatcaatacc tttccaaggt ttaatccatg  
22561 gtgcagttcc attttttaag ctttctatga ttttatcggc tgtttcttgt atgaaatcct  
22621 ttttttcat gaaattatcc ttgatcttct gtgccttctt tggcatcatc ttcgcttaag  
22681 gcattttctt taaatgcacc taattcttca gcagttaatg gatcaacctc atagctgaaa  
22741 tttggatttg tttctagttc tttaaaatcc ttcataattt tctccttctt caatattagg  
22801 tattgtttgt ttttcttttt ttgggttctt aaaatctatc tcttttgcct ttattcgggtg  
22861 ttttgagtaa atttttcctt catgctccca agtgtcttga gttagttctc caaccacatc  
22921 aactgaaatg ctttttttta aatatgggtg catggcatta gcaaaaagaac caaaaagaga



22981 tacttcgata taagttgaat tttctatctc tttgtatfff ctgttgtttg ctaaggtaaa  
23041 ggtgcatatg atactacctt gattacaatg tcttaattca gcatcagctg ttaatcttcc  
23101 gcctattgta atattattaa tcattatctt gctcctcatc ttctaagtta tcaataaagc  
23161 ttggctcatt atcatcaaat tgtgtagggt tttttcttc caaattttca ttttccattt  
23221 ttactccttt ttttgtgttt gcaaattgaa aagattgtaa gtaatcttaa ttcttgtgtc  
23281 tgatfffctt gctfffctt ccaagtcatc tatcgtffff gctgttgaat cgtatftagc  
23341 tacatagcca tttagaaaatc ctttttttaa atccccagta ttataaatac ttaaagcctg  
23401 atttatacga tcttctttcg cttagatfff atttgtcatt tcatacgcca aataaaaaat  
23461 atcactacc gctttaatat ttttacaagt atctaataaa tcttctacgc tgtaatgtga  
23521 gaatgttgaa gatttaagat tgttagaatt aaattgcatt agtccaatat ctacactata  
23581 tcccccttta atgaaattgt tcgctaaatt ttcagcttct tttttatfff ttaatataaa  
23641 agagccaacc ttattaatgt taattgcaaa ttgttgattg ttgctttcta cttgaataat  
23701 cttttgtatg atttgtgttt ctacatttgg atttttgcat tgttcaatta gagcaatatc  
23761 aatcattatt taactccaaa ggctctaaaa taatatcctt agttacaaaag atattaaatt  
23821 tatatccagg acgaatfff aaagtagggc tgatattcat atttttctt atcatctcgc  
23881 ttgcgacttg acccatttgt tgaatagctt gtgcgattgc tttatccgaa gcagtttctt  
23941 tttcgtgtt tgtgtctgaa ttatcagaca acgcaatacc tgcgctgatc gatgaaagta  
24001 aaaaagcaga gccgaaaatc ctaaaataat gattatccac ttgatcttca aagcctgtat  
24061 atccatcttg tgaagttcct tgcattgcat caagatttaa ggtatcacca ttcgaaaaa  
24121 taagcttatt ccatgctact aagagtcttg attgaccata aataatatta cttgaataag  
24181 ctctacaac tttagttcct tgtggaatta aaaggatfff tccagttgcg ctatcataaa  
24241 cttttgtgt tacttgtgcc aatatttgac caggtaaadc cgaattaaca cctgtaatta  
24301 aatggcagg tatattcaa cccgctttaa tttcataagt gcttaatgggt ttttgtttta  
24361 catatfttaa atagccattg tctftfttt gagataaaaa ttgttgccct tgcacatctt  
24421 tgtttgtgcc actttctaag cccagtcctg tttttgtgg attgattgct ccaagattaa  
24481 tatcttcatt attattaggt ggattgaaat taattgcttg gttftftttg ctatccgttg  
24541 cttctgtfff gatatcaagc ttggtattgc ttaataaagc ttttaactgc atatctfttt  
24601 taatcttcat ttctftttca tctatagcat tgttttggac aaggacagga gtattgttag  
24661 gtggctgttg ttagtfttga gaatttgttt cttgaatagg ttgttgtgtg gcatttggca  
24721 taggtgggtga aattatatta ttttcttgtg cttttgaaac ttgtaattcg tcaatatata  
24781 aattaagatc attgttatga tttgtagcta tttgtgtttc ctctfttgggt gtggtttgcg  
24841 cagtttgtct ttctaaatft tgcfttcttg ataaggctac ataaaatag ctaaataata  
24901 ctattgcat gattgcaaat attattataa taggaactft cgaagcctt ttgttatfff  
24961 ttggtaaaaa tttgttagga gacatattca cttcaagcat aatttaacct ttagtftttg  
25021 gagtaaaat aaaacttgtt atatttgggt ttacaagttt attttcgatg atftftataaa  
25081 tcacattgat tttactftca ttgatattaa atatcgcaac tatatfttca ttatcaatft  
25141 gtgaaatftg atagcttaag aaggftaaat cttftfttaga attgtcattg cttattgcat  
25201 aacctftftt tcttaaggta ttgataaaat agtttagaaaa atcttgatta tftftatctt  
25261 cattgataaa aatgttagtt ttgttaggtg cgtaatatga aataatgaac tgcgaaaaat  
25321 cgtctgcaat tttattgtag tttatftttg tttcttcaac tgcaagcta gagftaaaaat  
25381 aatccgaatt cattfttagca cacgaggfta taaagaaagc gattaacgcc aaaaaataaa  
25441 tfttcatftg tfttcctftt tattftggag tgataaatca taaagcacat tattaactat  
25501 atcttgatta gctftgtftg aatgctftgt gattfttaatt tfttcttgtt ttgagcctac  
25561 atftgaaagt aaaatcgctt tgttaaaaaag cctatctaca ataaaagtat catatftcaa  
25621 gcgataatft acgatttgtt tttcattact agaatctaaa atcataagcg cagggtcttc  
25681 atagaatftt aaatftfttgc gattftgaat ataagftftt atgccgtcat tgtaaatftc  
25741 taaaggftta aaagggtgcat taccttctac actatagcca aagtccaaat tttcaatatt  
25801 actcggaatt tcatcatctt ttgtfttata gaaatftfta gattctgatt ttgctftcat  
25861 ttgattftta taatcttcaa gagftfttat gatactatft ggataattaa atgaaaccgc  
25921 aggcataaat ttcttagctt ctgatattaa atfttaagcga taaactcgct tatttgtcat  
25981 gatattcata gttgtfttga agftfttatc ggtaggctta atgatgatat gagagattaa  
26041 ataaggctct tcaccactta cgcttaatga aacagcccat cttatactat cgcctatftg  
26101 cacatctfta atcattcac caggftctaa agcaatatca gtaagtctta aggggtcgggt  
26161 tacaatactt ggcattgatt caccaaaaaag aaaaattact tctcattat tctctgtat

```

26221 agtagtagtt tttgaattta tccatTTTTg tgctattgct agatcTTTTt tttcttttgg
26281 tgtaagattt gaaaaatctc tttcatttag attgtttagca attaaagaac ttgcaattaa
26341 agaacttagt aatattattt ttttcatata ttcaactcct tataaaaatt ttgcaaaatt
26401 aatatcagtg atgaaaatcc ctaaaggatt ttttaaaatt tgttcttctg tatttggaa
26461 gatttgttta atttggatta atcctcgata agtttcttta gaaagaatat cttcatttaa
26521 atttgtagtc gtctcttccc attcaacttg ccaagtgtca atattttgtg gaacgatatt
26581 ttttaatttc actcgcacat tttcctttgt agatcgtgcg aaaggattgt ttttttga
26641 ttctgaattt aaataattaa atgcttttga tcttggctcc acataagcat aggcacaaa
26701 tatgaatttt ctttgagttt cggcatttcc ccaaaccgaa cgccaagaat aaataaaagt
26761 atttagacta tactttatta ctttgggtt ttttaagtgc atattttgca ccattcctac
26821 tttagctgta ttgcctaact tatcaacttc aataacataa gggataagct tgttttgaga
26881 gccgatatag cctataaaga gaacacatac aaagcatata gctaagctga tcatcgctac
26941 aatttgccaa ttttagcac gagtgatata atctccgtat ctttctagcc attcggtttt
27001 tgcattaaga taaggattac ttgaagtgtc aaactcattc ttttctatct tttgttttgg
27061 tctgaaaata ttcattcttt cttactcctt gtttttattc catagcatcg ggatttattc
27121 ctgattgata gttttcttgt tttgggtgac ctgatgatat accgccttca cttgtttttc
27181 cttgtatata ttttaagttt tcttgaagc gattagccat ttggtttggc attctacctt
27241 ttgtaagatt gtctcttaag tgttcgccac ccgcgcttgc tagatttttt gccacacctt
27301 taaccaagtc cattccaccg gctccacctt ctgctaaatg caaggcttta gctgcattca
27361 tagcacgagt aacgccgaca gctcctacag ctgcacctgc cgcagcgcct gctgccatgg
27421 tagcaaccgc cctaaagcct gccgcagcgc ctgcgctttc tccaatacta ccattaaata
27481 cggcttcaat aataccagga accatttttg taattaggca gaatgtaacg gaagtgacta
27541 gaattgtcaa aattacttca gcgctcgaat tttgtgttat ttcattattt attgtatcta
27601 tcatgttaat acaaagagcc attaagcctt gtatcataaa gagttctaca cctactttaa
27661 tggctgtcat tataggattt aagcctattt gtttaaaatg atttaatcca cctaacgcca
27721 aagcaaaaaa tacaattaca ttcattaaga aaaattttta atagacaatc agtaaatcaa
27781 ttgccattaa acaaaaagct attaaaataa taacacctgc tataactttt aatcgaat
27841 caccaggact caaaaagtc atagaacgaa taatttttat tacaatagat aatgcttgag
27901 ctataatatt attaggagaa accgatacac cattatttac atttgtggct aattgcgaaa
27961 agctattaa aataatttgt aaccattgat cgatattaa taaaaatagg aatcgccta
28021 catacattat ttttttaata agagtggcta aaaactctcc aaattcaaaa ccgctcaaac
28081 cttttaagcc aaaagtccaa actaaatcaa taataactaa agtccaaaat acccataaac
28141 aagcggtttt aataagaggc gtccaagata agagtccatt tcgtattata tttaaaacgc
28201 cttcagcatt ttcagctcca aaagctaaat ttggagcaag aaaaattaaa aaaataatcg
28261 ctagtttatt tccatttaag agcgtctggg tttgatttac cccaagtttt ttcaatataa
28321 cctgtatctt ctgtttcaac tgcccatttt gcattagaac aatccctttg ttgagtttca
28381 ttcattttct ccattttttt acattctgca actctagctt ttgcttctc taagtgcgct
28441 ttataataat cgcttgtttt tgcctcatcg ccacaacctg ctaaaaaagc caaagcacct
28501 aaaccaatta atc

```

//

>>BfR-CA-15857\_min\_cov\_30 putative plasmid location

```

LOCUS      LBFOAKKB_1          17297 bp    DNA        linear      12-APR-2021
DEFINITION Campylobacter species strain strain.
ACCESSION
VERSION
KEYWORDS   .
SOURCE     Campylobacter species
ORGANISM   Campylobacter species
            Unclassified.
COMMENT    Annotated using prokka 1.14.6 from
            https://github.com/tseemann/prokka.

```

```

FEATURES             Location/Qualifiers
    source            1..17297
                     /organism="Campylobacter species"
                     /mol_type="genomic DNA"
                     /strain="strain"
    gene              complement(64..303)
                     /locus_tag="LBFOAKKB_00001"
    CDS                complement(64..303)
                     /locus_tag="LBFOAKKB_00001"
                     /inference="ab initio prediction:Prodigal:002006"
                     /codon_start=1
                     /transl_table=11
                     /product="hypothetical protein"
                     /protein_id="Prokka:LBFOAKKB_00001"
                     /translation="MLGTKIFWVQYLKKRQIVINRVETTMKWSFSTLAWVQKCPCLNL
DFLMLNLKLSKMGILYFSLGTMKMPMLKLGFLNA"
    gene              803..1234
                     /locus_tag="LBFOAKKB_00002"
    CDS                803..1234
                     /locus_tag="LBFOAKKB_00002"
                     /inference="ab initio prediction:Prodigal:002006"
                     /inference="similar to AA sequence:RefSeq:CKG86054.1"
                     /codon_start=1
                     /transl_table=11
                     /product="hypothetical protein"
                     /protein_id="Prokka:LBFOAKKB_00002"
                     /translation="MPQTDTPNAKNRIHKAIETWFTKIYLNKIIHNAKDTSIFINKS
SCLAFILSIYGKTEENKNKMTPAVITHINTTKNNFATKLKRVKNHENIVELQAKYPKL
DIISAYQFLTLKDKFKITKSEIQDFETLIDILSKNAQKSKK"
    gene              2561..2905
                     /locus_tag="LBFOAKKB_00003"
    CDS                2561..2905
                     /locus_tag="LBFOAKKB_00003"
                     /inference="ab initio prediction:Prodigal:002006"
                     /codon_start=1
                     /transl_table=11
                     /product="hypothetical protein"
                     /protein_id="Prokka:LBFOAKKB_00003"
                     /translation="MDKAVNMKSPKMKLINKIAIGLGIAMFALILLSCLLINIYNIG
IKHIILSFIISLVCLFLVLLLINTANKPFKKTYPKRGNCYDTHFKQSGISKYSTLSLS
NPFYNNLYSNED"
    gene              3070..3420
                     /locus_tag="LBFOAKKB_00004"
    CDS                3070..3420
                     /locus_tag="LBFOAKKB_00004"
                     /inference="ab initio prediction:Prodigal:002006"
                     /codon_start=1
                     /transl_table=11
                     /product="hypothetical protein"
                     /protein_id="Prokka:LBFOAKKB_00004"
                     /translation="MENQEQKGLFELYNFYENKRNTTCYIFDKEDYQSITSENYFIK
NYLKKRKISYLLLEDLFDLNSSNNLYQNCKIYKECVDILNKFTNQINIGILYKPKTYFSR
RVIYNILQRLANQA"
    gene              complement(3675..4316)

```

CDS /locus\_tag="LBFOAKKB\_00005"  
 complement(3675..4316)  
 /locus\_tag="LBFOAKKB\_00005"  
 /inference="ab initio prediction:Prodigal:002006"  
 /codon\_start=1  
 /transl\_table=11  
 /product="hypothetical protein"  
 /protein\_id="Prokka:LBFOAKKB\_00005"  
 /translation="MFVGFSKNLGNGFRIGIGYNLNNKHSKRDNDRREEFVSKVINEV  
 RNLFQEMCNKLNVSRETFEFAVEQDCQIKITDILTEDNSKKVSEISDIFSTISELIEK  
 VSFSKSLSTKTKETITDLIFKSKKIIFTLESENDLEQRLISLLSEKLQKEEKKIRKMI  
 KKMNGKKKKIGCLTYIVLFFIFMLIISFITHEDKTNNLEHSNVEHSNIDKKT"

gene 4702..5037

CDS /locus\_tag="LBFOAKKB\_00006"  
 4702..5037  
 /locus\_tag="LBFOAKKB\_00006"  
 /inference="ab initio prediction:Prodigal:002006"  
 /inference="similar to AA sequence:RefSeq:SQE24169.1"  
 /codon\_start=1  
 /transl\_table=11  
 /product="hypothetical protein"  
 /protein\_id="Prokka:LBFOAKKB\_00006"  
 /translation="MKEITMEKAHLITYLISLAFIVSGLIVCCILYLFKDKINKITPD  
 NIDNINSNVKDFIEKNICGGSSTIDHSFTTNFGDCSSISGNTSSSTNYFIDPTYSYMP  
 ENIYHNNQD"

gene 6041..7183

CDS /locus\_tag="LBFOAKKB\_00007"  
 6041..7183  
 /locus\_tag="LBFOAKKB\_00007"  
 /inference="ab initio prediction:Prodigal:002006"  
 /inference="similar to AA sequence:RefSeq:ALW56296.1"  
 /codon\_start=1  
 /transl\_table=11  
 /product="recombinase RecR"  
 /protein\_id="Prokka:LBFOAKKB\_00007"  
 /translation="MLRKIEISGLYSFGIETQIVDFTAKPKSKLKNTKYEYFNLSQA  
 GKPMKSAVFFGKNTSGKTNFFIGVKILLNIIKYGFHALREHLVDNAFNKNSNSIKLS  
 IELSNNDKIFTYSIEFDKKYILKESFLKNNKIIYKFENDKAIFFNIYSIEDNKLLESF  
 FSRNLSENI FYLLKDFEIEQKEIFINL INNIEVYMNSNYSKKYNFEFEENKKKYFLEH  
 KESILEIFQLDKTIKDFEFKYYKDEKNIYEIFFVRNGKFFNYQIESEGVKKIVYFA  
 DKITQIIKEGKIVFIDELDSSISTLALILIFNNLINTEENHNGQLIVSSHVLLFDVS  
 FLNSQQIFLIQKQHLSEKIRTYDYDIRSEKKKAYIDYLGKLYDE"

gene 7173..7775

CDS /locus\_tag="LBFOAKKB\_00008"  
 7173..7775  
 /locus\_tag="LBFOAKKB\_00008"  
 /inference="ab initio prediction:Prodigal:002006"  
 /codon\_start=1  
 /transl\_table=11  
 /product="hypothetical protein"  
 /protein\_id="Prokka:LBFOAKKB\_00008"  
 /translation="MMNKTKPSIQIWCEGKTEEDYFNLSFKYLYNDNVKIDVKNLKN  
 NNSYKNILYKIEKAPYVDKLIIVMDLDRAKSDTNELKILEKLIKHIKNSKGGKHLFTL  
 GDFEDWLRHFVHRSRNSKTI FYKKGYSKSNFKSSTNDLYSQILNKGGHIEAKEY

FCNIKVVFFNEQCEIDKNSLNNLTQSNLYYFRKLLLEQYNGA"  
 gene complement(8469..8564)  
 /locus\_tag="LBFOAKKB\_00009"  
 CDS complement(8469..8564)  
 /locus\_tag="LBFOAKKB\_00009"  
 /inference="ab initio prediction:Prodigal:002006"  
 /codon\_start=1  
 /transl\_table=11  
 /product="hypothetical protein"  
 /protein\_id="Prokka:LBFOAKKB\_00009"  
 /translation="MIINEDKKIEDLIKEAFAEKIWLPEFQRPFA"  
 gene 8743..9201  
 /locus\_tag="LBFOAKKB\_00010"  
 CDS 8743..9201  
 /locus\_tag="LBFOAKKB\_00010"  
 /inference="ab initio prediction:Prodigal:002006"  
 /inference="similar to AA sequence:RefSeq:AVS36970.1"  
 /note="DUF4065 domain-containing protein"  
 /codon\_start=1  
 /transl\_table=11  
 /product="hypothetical protein"  
 /protein\_id="Prokka:LBFOAKKB\_00010"  
 /translation="MEQNNAYCGKKIANEFIRLNCNKNNILTHMHIQKLVYFAHMSL  
 ATYNKPLVKETFQAWPYGPVNVVEIYQELKSGKDNIISMLKTEDDSAELDENSKKIIH  
 AVYDKFGGKNAWKLSEISHNNSPWKKVFEKGSNPISNEDIINYYKSSGE"  
 gene 9207..9761  
 /locus\_tag="LBFOAKKB\_00011"  
 CDS 9207..9761  
 /locus\_tag="LBFOAKKB\_00011"  
 /inference="ab initio prediction:Prodigal:002006"  
 /codon\_start=1  
 /transl\_table=11  
 /product="hypothetical protein"  
 /protein\_id="Prokka:LBFOAKKB\_00011"  
 /translation="MDFLEKNINKEEIRENQENQENQENQESKESKEITCSLYYA  
 FYKLEENYNTIEERIKNESNKFEERIKNESNKFEERIKETQKQYITILGIFASIVLTF  
 VSSFAFSSSILSHMHQVSIYRLIFVILCIALFVVNILYGLYSFLIKIHNGNIKSNNKP  
 ITNFMIIILVLIVINYFCYLARYY"  
 gene complement(9904..10593)  
 /locus\_tag="LBFOAKKB\_00012"  
 CDS complement(9904..10593)  
 /locus\_tag="LBFOAKKB\_00012"  
 /inference="ab initio prediction:Prodigal:002006"  
 /codon\_start=1  
 /transl\_table=11  
 /product="hypothetical protein"  
 /protein\_id="Prokka:LBFOAKKB\_00012"  
 /translation="MFGRNLLKIRKASGLTQLELAKILNTTQRTISLWETGNFEPPLN  
 TILLLCDIFKVTPNDLLLEGCYDDDNEYLAHHIVRLTKELNCRITYTKRFLNHILRRL  
 LEKLTSHLQKFKGDSFARKLAHSWTGKGERMLLVFYFIEYLEKYINENNIDKNSFL  
 KLLNDFNLSKDNTNTIHCFILKEKDKINLIEWVEKEMQEFEEKVLVAMLKDEIKTLIK  
 KEINTLNKLLV"  
 gene 10964..11242  
 /locus\_tag="LBFOAKKB\_00013"

CDS 10964..11242  
 /locus\_tag="LBFOAKKB\_00013"  
 /inference="ab initio prediction:Prodigal:002006"  
 /codon\_start=1  
 /transl\_table=11  
 /product="hypothetical protein"  
 /protein\_id="Prokka:LBFOAKKB\_00013"  
 /translation="MNMDNIIICKASDLEIFKKILKENELIKNKTDENLNVQQASNY  
 LKISTSKLYKDCNLGKIPFCKIGKLVFKKNDLDEYLFNSSKNSLKF"

gene complement(11288..12418)  
 /locus\_tag="LBFOAKKB\_00014"

CDS complement(11288..12418)  
 /locus\_tag="LBFOAKKB\_00014"  
 /inference="ab initio prediction:Prodigal:002006"  
 /inference="similar to AA sequence:RefSeq:ALW56279.1"  
 /codon\_start=1  
 /transl\_table=11  
 /product="integrase"  
 /protein\_id="Prokka:LBFOAKKB\_00014"  
 /translation="MKNLVKIKEYKGIYFIDKDKKLEDIKEISLVELQRRLTIPYELA  
 IRYEGKSSYEIFPILNNTQTLKKNCELIALQRINGKFAKKFKIKEPKLNEVFEWI  
 SMRKNITISKHYEVTIFSYNAHIKDVIGNIKIKQVCLKDMQNVNKMIDQGKSPRTTK  
 TIKDILSPVFEFAIKNDYIEKNIAREIEIQKFDNKRYFTIDDEDRNALYKAIINYENL  
 MIRAMFIFLLHGRRKSEVLTWKWDNIDFANKIYFLPSNQNSRKNLQFPLSSLQIEAL  
 KSIGVKNKGYIFIKEDGNPYKDIRWHWDKINQKLKTPIRLHDLRHLIGYIGINMGISL  
 EAIGETLGHSSIGVTKRYANIKNETINNTLNAIFSNFKTEKH"

gene complement(13627..14628)  
 /gene="flgS"  
 /locus\_tag="LBFOAKKB\_00015"

CDS complement(13627..14628)  
 /gene="flgS"  
 /locus\_tag="LBFOAKKB\_00015"  
 /inference="ab initio prediction:Prodigal:002006"  
 /inference="similar to AA sequence:RefSeq:CAL34921.1"  
 /codon\_start=1  
 /transl\_table=11  
 /product="signal transduction histidine kinase"  
 /protein\_id="Prokka:LBFOAKKB\_00015"  
 /translation="MNEDILKSLDSSEKETFQKGLLSLIEQTYIVENEYKNLRAMLDG  
 IIEVLPALWVLDKEKNIILQNQEALKKPRLLDIISLEKNRDELEFENRFYTVKIISD  
 NEKTIVSATDISDEKRNERLASMGSAHAHLAHEIRNPIGSISSLASTLFSRSELKNKH  
 IVLEIQKAIARVERIVNSTLLFTKGVHINASEFNLELTEECESAINSYSSQIDFE  
 IKFLDMKIYGDKALLSLVLQNLINAIIDAIEESEECENPKIKIQASCDEQNLVIRVYDN  
 GCEIKDENLVFEAFRTTKLKGNGLGLSLSKEIINAHKGELKFEIQPKNFYFILPCKL"

gene complement(14625..15446)  
 /locus\_tag="LBFOAKKB\_00016"

CDS complement(14625..15446)  
 /locus\_tag="LBFOAKKB\_00016"  
 /inference="ab initio prediction:Prodigal:002006"  
 /inference="similar to AA sequence:RefSeq:CAL34920.1"  
 /note="conserved hypothetical protein Cj0792"  
 /codon\_start=1  
 /transl\_table=11  
 /product="hypothetical protein"

```

/protein_id="Prokka:LBFOAKKB_00016"
/translation="MTKIFDFYSVFEGFESLDSLNFEKDIFENIECLLLKNYLHIKEH
FELDETASYALSLLAKNNRKRFSINRKIQHFKALSTLKYLLRAGIIRLEYSKEAKRIK
DKRQKLKKELRSYVIQDKIIFANHFTRFFFYFLKPNEKLILQNQYEEVLGLIKEKFEL
YQSFCFEQLSRELLEKKFQVSGVQSYWDKNLELDLYYKDDEISFIGEVKFKNKKICRN
ILNLLSKAKSLKLEPNYYIIISKNGFSKEFYKICKQNLLMLDNLDFKILLEEDR"
gene 15550..16818
/locus_tag="LBFOAKKB_00017"
CDS 15550..16818
/locus_tag="LBFOAKKB_00017"
/inference="ab initio prediction:Prodigal:002006"
/inference="similar to AA sequence:RefSeq:CAL34919.1"
/codon_start=1
/transl_table=11
/product="putative aminotransferase"
/protein_id="Prokka:LBFOAKKB_00017"
/translation="MQISDLKKEIILKKGTLHFDFTASALALKCVEKEIAKILPSYAN
THSDSSLNSFKTQQIYEQARKDIKTSLELNDDFALIACGSGSSSAIKKFQELLGIYIP
PLIKEKYFDKVDKSTLPLVIVGPYEHHSNELSFREGLCECIRIPLDKGGIDFEILEK
VLKENQHRKIIASFSLASNVTGILSDYKRISKLVRKFKGIVAFDASSFIPYKNIACKY
YDALFISSHKLIGGIGGSGLLAIKKELCGSKPSFAAGGTVGYSVRTSQCYLNEEAL
EGGTPGILQLIRASLAFKIKDKIGIEEIEKKEETLKEYFFEKLKTIPHLILYANNIKA
RLPIFAFNIENISPFDLAYELSKKYHIETRAGCACAGPYGHDLGLKDNELKTKPGW
LRISLHYTHEKEDIDYFFFEALQKSITKLF"
gene complement(16822..16898)
/locus_tag="LBFOAKKB_00018"
tRNA complement(16822..16898)
/locus_tag="LBFOAKKB_00018"
/product="tRNA-Asp"
/inference="COORDINATES:profile:Aragorn:001002"
/note="tRNA-Asp(gtc)"
gene complement(16920..16995)
/locus_tag="LBFOAKKB_00019"
tRNA complement(16920..16995)
/locus_tag="LBFOAKKB_00019"
/product="tRNA-Val"
/inference="COORDINATES:profile:Aragorn:001002"
/note="tRNA-Val(tac)"
gene complement(17004..17079)
/locus_tag="LBFOAKKB_00020"
tRNA complement(17004..17079)
/locus_tag="LBFOAKKB_00020"
/product="tRNA-Glu"
/inference="COORDINATES:profile:Aragorn:001002"
/note="tRNA-Glu(ctc)"
gene complement(17093..17168)
/locus_tag="LBFOAKKB_00021"
tRNA complement(17093..17168)
/locus_tag="LBFOAKKB_00021"
/product="tRNA-Lys"
/inference="COORDINATES:profile:Aragorn:001002"
/note="tRNA-Lys(ttt)"
gene complement(17172..17248)
/locus_tag="LBFOAKKB_00022"

```

tRNA complement(17172..17248)  
/locus\_tag="LBFOAKKB\_00022"  
/product="tRNA-Asp"  
/inference="COORDINATES:profile:Aragorn:001002"  
/note="tRNA-Asp(gtc)"

ORIGIN

1 atgggcattt ttgtacccaa gctaaagtag agaatgcccc tttttaggga ctttaatttt  
61 aaattaagca ttaaaaagtc caagtttaag catgggcatt tttgtaccca agctaaagta  
121 gagaatgcc atttttaggg actttaattt taaattaagc attaaaaagt ccaagtttaa  
181 gcatgggcat tttgtaccc aagctaaagt agagaatgac ctttcatag tcgtttcaac  
241 gcgatttatt acaatttgtc ttttttttaa atattgcacc caaaaaattt ttgtacctaa  
301 cattcattaa cttcgttaat aatattgcc a tttttgtacc taacccaaag catttttagc  
361 ccctgaaata gaaaagtctt cttctcgccc tttatcacct catttatccc cctcttcgaa  
421 ttagacacat ttttcttgaa agtttcctc atttatcacc tcatttatca cctcatttat  
481 cccctcgatt ctcatcacac tttccttagc cccataagca aaatccatct tctcatctcg  
541 atcatatacc tacaagcttc ttacaatagc ctttccctc atttattcac tcatttattc  
601 actcatttat cccctcattc tttacctcat tcttccctc atttattcct tttctcgctt  
661 ctatttcgat cctaaatgcc tgtttatttt tagccacttt tgatataaac tataccccac  
721 atataaaaac actcatttag tacccaagtt taataaaaat acggtttaac tccacaaaac  
781 caccaaatcc ataggagcat ttatgcctca aacagatata aaaccaaag caaaaaaccg  
841 aatacacaaa gccatagaaa cttggtttac taaaatctac ttgaacaaaa taattcacia  
901 cgccaaagac actagcatct ttatcaaca aagcagttgc ctgacattca tactctcaat  
961 ctacggcaaa accgaagaaa acaaaaacaa aatgacaccc gctgttatca cccacataaa  
1021 cactacaaa aacaatttcg ctaccaagct aaaaagagtt aaaaaccag aaaacattgt  
1081 cgagctaca gccaaatc caaagcttga tataatatca gcctatcaat tcctaaccct  
1141 caagataaa ttcaaaatta ccaaatcaga aattcaagat ttcgaaacat taatcgatat  
1201 tctttcaaaa aacgccc aaaatcaaaaa gtaaccaaga ccattaaaaa aaccctttta  
1261 gccttttaag ggctattttt gtgattttta acgctatatc cactcaagat attcacataa  
1321 aatcaaaaaa acccgcaaaa attaaccaa aacaaaaacc acagcacatt tcaaaattgc  
1381 aacgcagttt tgaaaattcg ctagaacttc taaaatcagc cctagctctc atattatcgc  
1441 tataaatcaa gcgcaatcaa aaacacacgc catgaagaaa attttgcagt ttttggctct  
1501 aaagtctatt tttgcaaaa tattacatga taacttgata atcaataatg gcaatcacct  
1561 aaaaatagat attttaaaag cttttacag atcgcaaaa gtcggtaaaa cattgatgat  
1621 tacttgcccg caataataag ctttaaatgc ttatatattg gctatactct tgcattatgc  
1681 ccattggctc aactttttac atttttttca aaaaaagcaa aagaacctaa aaataagggt  
1741 ttaacatag ataagccctg aatattgata ttttattttt ttattacact ttttaagat  
1801 gattttcatc tttaaaaata atattaacac aaagaaatcc cataaaatag catttttagc  
1861 aattttttta gtgtaataaa cttgcaataa acctgcaata aacttgtaat caacttgtag  
1921 ttaatacgca ataaaattgt atttggagtg ctgataacta cgctttaata tcaacttgag  
1981 ttcaaaaatt atacattttt gtagtaaaag tgtaatcaac ttgaaataaa aatcacacia  
2041 acataaacta aacttgtagt taagttgtat ttcacgataa aaattttatc gtttaagttgt  
2101 atttaatgcg tatcataatt gaaatgaaat tgtatattac ttgaaaacaa cttgtaatgt  
2161 atgtaaataa cattttgtat agttgacttg tagttgactt gtagttaatt tacaataact  
2221 tgtatctatc ttgcaatatt attgaaatta aattgtattt atcttgact tattttgctt  
2281 ttagtttttt atattgttgt gatacattgt ataaaataat tgcacagcac ctttcatact  
2341 catgctcaa tgaaacagat tcttctagga ggaaatcttt agtaataggt tgatgtttca  
2401 atccaatatt gtatttttta aaataattgc caccaattga caaagaaatc catttaaac  
2461 cctataaaat aggcatttga tagcaaaaat acttaca aaa atttattaaa atatggtata  
2521 attatgttat ataaataact taattatgaa aggaataata atggataaag cagtaaatat  
2581 gaaatcacca aaaatgaaat taataaataa aatagcaata ggattgggaa tagcagtaat  
2641 gtttgctttg atattattaa gctgtttatt gataaatatt tataatatag gcattaaaca  
2701 tataatttta agttttataa ttagtttagt gtgtttattt ttagtattac ttttaataaa  
2761 cactgcaaat aaaccattca aaaaaactta tcctaaaaga ggcaactgtt acgatacgca  
2821 tttcaaacaa agcggaaat caaaaatatt aactctttcg ttgtctaact ctttttataa



2881 caatttatat tccaatgaag actaattgag aaattaatct caattaatct tagtgtatag  
2941 cgggatcccc tgtttttaca tttattagat gattagcttt ttttaattttt tctccgactt  
3001 cattgtttta attagatttg actgctacac ccttaacttc ttgactatct gggcataggc  
3061 gattttatta tggaaaatca agagcaaaag ggattgtttg aattgtataa tttttataat  
3121 gaaaataagc gtaataccac ttgttatatc ttcgataagg aagattatca aagcataacc  
3181 tcagaaaact attttataaa aaactattta aaaaaaagga aaatatctta cctgctagaa  
3241 gatctatttg atttaaattc aagtaacaat ctttatcaaa attgtaaaat ctataaggaa  
3301 tgtgtagata ttttaaataa atttacaaat caaaatatag gcattttata taaaagccc  
3361 acttacttta gcaggcgggt aatttacaat atattacaga ggctagctaa tcaagcatag  
3421 agcgttacia tcacccgacc gtgaaagctc aaaaactttg cgatagaata attcaactc  
3481 actcaaatga aggtgacacc attttcattc cttttgtagg aagcataagc gagataatth  
3541 cggtcataaa aaataataga aaagcctttg gttgcgaaat atacaattta gcaaaagata  
3601 taataaatac cttgttaaaa gtagatagat actattaaaa aattatcaat ttgtaaaaat  
3661 ttataataaa taatttactt tgttttctta tctatattgg aatgttctac attggaatgt  
3721 tcaagattgt ttgtcttgtc ttcattgggtt ataaaagaaa tgataagcat aaaaataaaa  
3781 aataaaaaca tatatgttaa acatcctatt tttttctttt taccgttcat tttttgatc  
3841 attttcttta tcttcttttc ttctttttga agtttttctg aaagtaatga gatcaatctt  
3901 tgctctaagt cgttttcaga ttctagtgtg aaaattatth tttttgattt aaatataaga  
3961 tctgtaattg tttctttcgt ttttagttgat aaactttttg aaaaactgac tttttctatc  
4021 aattcagata ttgttgaaaa aatatccgat atctcagaga cttttttgga gttatcttct  
4081 gttaatatat ctgtaatttt tatttgacaa tcttgctcta cagcaaattc aaaagtttcc  
4141 cgagatacat ttagtttatt gcacatttct tgaataaat ttctaacttc atttataact  
4201 tttgaaaca atcttctctc atcattatct ctttttgaat gtttgttatt attaaggtta  
4261 taacctatac cgattctaaa tccatttctc aaatttttac taaaaccaac aaacataaat  
4321 tttcctaaca aaatthtata taaataaca aagacttaat aatataaaaa actthtaatt  
4381 cgttataacc cttgagttt tcaactcttg cggaaataac cctaaaggct taactatgaa  
4441 agaacatagt aagcgttttg tgagattata tcaaaattht aagttttttt aaacttaag  
4501 ttgaagtatt tttctaaca aaccgcagga gcagaaaagt cccttgctt tattagtgtg  
4561 tgaaccaca aattcgcatt tttttttca agttaaataa aaaagttcgt tccaagccc  
4621 ataaaataag ttttaatag caaaaatact taaaaaatt ttttaataa taatataatt  
4681 atgctatata aataagttaa tatgaaagaa ataacaatgg aaaaagcaca tttaatcact  
4741 ttttaataa gtcttgcaat tattgtaagc ggtttaatag tttgttgat tttatactta  
4801 ttcaagata agataaataa aataacacct gataatatag ataataataa ttcaaatggt  
4861 aaagatttta ttgaaaaaaa tttttgtggt gttcatcaa caatagatca ctcttttacg  
4921 acaaattttg gcgactgctc atctatatca ggcaacta gctcatcaac aaattattht  
4981 atagatccaa catatagcta tatgccagaa aatatatacc ataataatca agactaagcc  
5041 tagctaaaaa gctagactcg attttacata tttctattht ggctaccaa atctatgact  
5101 ttgctaattg cagcttttcc atctttaa ca ttttttgta cgctagtgtg atccaatctt  
5161 attatthtct tcctcaatag cagttcctgt tttatattca gcaacacct ctactthtaa  
5221 ctactthtta tatcaaaagc ccagatggct atthtctca aaaaattggt taatacaata  
5281 ttctattaat tttataaac aacattatth atthtggat tttgtthta atcgtcttht  
5341 cgaagtaaat taggtaatga gctthaaaat aagcttgag tthtaatact atgagcaaaa  
5401 actaagtcca gctthttagc tgtactcaat tatctcgtat agggctaaat atataattca  
5461 atthaatata aaaattgcaa ttgttttcta tatatcctgt gattatagat ctagaagtaa  
5521 atctccttat ttgactthaa atcgatttg aaatattaaa caatacttcc aaatcttht  
5581 ttgcgataat tttthtaagc aaacattatt tgttagtgat gagctaaagg atagacatat  
5641 ttttacttht tcatcctctt gatgcttht atatagtagg aatthtaaat ttatgtcatt  
5701 taactgatta gaattatcta cactatcagc aggagtgtta gctthgttht tatcacgct  
5761 attccatctg ctgatattta aatcattaag acaaatata tttttgtaga tttagtttht  
5821 tatatgctta tgaagtaaa atattgaaat ttgctaagtt attcatttht taccttgatc  
5881 aagaatgtat ttttattaat tcatttht at agctthtaatt ctttagtgaa tattataaaa  
5941 ttatatcaaa acaggcttht aaattatgta tthtaaatat aaacatattt tatgtthtata  
6001 ttaacattaa tgctthtata taacacaaaa ggaaaatact atgttaagaa aaatagaaat  
6061 atctggtttg tattcttht gaatagaaac acaattggt gattthtacg caaaacaaa

6121 aagtaagttg aaaaatacaa aatatgagta taattttaat ttatcacaag ctggaaaacc  
6181 tatgaaatca gcagtttttt ttggaaagaa tactagcgga aaaactaact tttttatagg  
6241 cgtaaaaatt ttactaaata taattaaata tggcttttct catgccctaa gagagcattt  
6301 agtagacaat gcttttaata aaaattcaaa ttctataaaa ttaagtattg agttatctaa  
6361 taacaataaa gatattttta catattcgat agagtttgat aaaaaataca tcctaaaaga  
6421 atcttttttg aaaaataata aaattatata taaatttgag aatgataagg ccatttttaa  
6481 tatttacagt atagaagata ataagctatt agaatcattt ttttcaagaa atcttagtga  
6541 aaatatattt tacttgttaa aagattttga aatagagcaa aaagaaatat ttataaatct  
6601 tataaacaat attgaagttt atatgaatag taactattca aaaaaatata attttgaatt  
6661 tgaagaaaat aaaaagaaat attttttaga acacaaagaa agtattttgg aaatttttca  
6721 attactggat aaaactataa aagattttga gtttaaaaag tataaaaaag acgaaaagaa  
6781 tatatatgaa atcttttttg ttcgcaacgg aaagaaattt aactatcaaa tagaatcaga  
6841 aggtgtcaaa aaaatagtat attttgcaga taaaataacc caaattatca aggaaggaaa  
6901 aattgttttt attgatgaat tagactcttc aataagcact ttggcattaa tacttatatt  
6961 caacaatctt attaatacag aggaaaatca taatggacaa ttaattgttt catctcataa  
7021 tgttttattg tttgatgtaa gttttttaaa ttctcaacaa atatttttaa ttcaaaaaga  
7081 tcaacaccta gaaagtaaga taagaactta ctacgattat gatattagaa gcgaaaagaa  
7141 aaaagcatat attgattatt taaaagggtt ttatgatgaa taaaaaaca aagcccagta  
7201 tacagatttg gtgcgaaggt aaaacagaag aagattattt taattccctt tttaaatatt  
7261 taaattatga taatgtcaaa atagatgtaa aaaatttaaa aaataataat tcatataaaa  
7321 acattcttta taaaatagaa aaagcacctt atgttgataa gcttattatt gtaatggatc  
7381 tagatagagc aaaaagtgat actaacgagt tgaaaatttt agaaaaactt ataaaacata  
7441 taaaaaattc aaaaggcaag cttttatttc ttactcttgg tgattttgaa gattggctta  
7501 gatttcattt ttagatcat agtagaaata gcaaaaacaat tttttataaa aaattaggat  
7561 atagcgatag taagaatttt aaatcatcta ctaacgattt atactctcaa atattaaata  
7621 aaggtggaca tatagaaaat gctgaaaagt atttttgcaa tatcaaagtt tttttcaatg  
7681 agcagtgatga gattgataaa aattcactaa ataactaac tcaaagtaat ttatattatt  
7741 ttagaaaatt attagaacaa tataatggtg cttaaaatat attataaaga aattctactt  
7801 cttttttata ttgcaattat atacagaaat tggttttttc cttagtcaag ataatttaaa  
7861 attatgagca ggtttatttt gtcttatttt tacaattttt agcttaattt atataattga  
7921 tcttctcaa agctatcatt caatctact tcagcaagct ctctaactgt tctttgttaa  
7981 tttcttcatc atctttaaac gcttcaaac tttttatcca taaggctttt ctctatttta  
8041 tgtattcttc gtttttaaac atatctatcc ttttgattta ttatttaatt tttacttggt  
8101 ttaatttctc taagatgatt tcaaaagtag tttcgtttat acccataaaa atccttttat  
8161 taaataacaa agtataataa aatagactt tattgcttat aaataatttt tttctgtaaa  
8221 catattattt aaactattct taatagaat ttgtcaattt tataaataac aaatatatca  
8281 acaaagcaac catgaatata agtatgttat ttcatcgttt tcattttgcc tgtcaggaat  
8341 tttaaaatct tttatacttc caccaactct tcttcttgca agttcatttc ctctctcca  
8401 ggataaaata tactaattgt gtagttatga acaaaactat caatgagtaa ctttatttgg  
8461 ttgttatctc atgcaaatgg tctttgaaat tctggtagcc aaattttttc agcaaatgct  
8521 tctttgatca agtcttcaat ttttttatct tcatattatta tcatgatttt aatccttgta  
8581 aaataaccgt ataagttatt atagaaataa aaataatatt acatgcaaat ccgaaaaatt  
8641 atcatthaaa tatgtaaatt taagtatctt tatcattaac ggtttttatt tatgatattt  
8701 atgatataat ttatagctaa aacatgaagt aggatgtaga atatggaaca aaacaatgct  
8761 tattgtggaa aaaaaattgc aatgaattt atcagattaa attgtaataa aaataacata  
8821 ctcacacata tgcatataca aaaacttggt tattttgctc atgctatgag tttagctaca  
8881 tataataagc ctttggtgaa agaaactttt caagcatggc catatggacc tgttaatgtg  
8941 gaaatttatc aagaattaaa agggctcggga aaagacaata ttataagcat gcttaagaca  
9001 gaagatgatt ctgctgaatt ggatgaaaat tctaaaaaaa ttattcatgc tgtatatgat  
9061 aaatttgggg ggaaaaatgc ttggaagttg tctgaaattt ctcataataa ttctccttgg  
9121 aaaaaagtat ttgagaaagg taaatcaaat ccaatttcaa atgaagatat aattaattat  
9181 tacaagtcta gtggagaata aagcaggtgg attttttaga aaaaaatata aataaagagg  
9241 aaataagaga aatcaagaa aatcaagaaa atcaagaaaa tcaagaaaat caagaaagta  
9301 aagaaagtaa agaaatcaca tgctctttat attatgcatt ttacaagttg gaggaaaatt

9361 ataatacaat cgaagaaaga ataaagaatg aaagtaataa atttgaagaa agaataaaga  
9421 atgaaagtaa taaatttgaa gaaagaataa aagaaactca aaaacaatat attaccattc  
9481 taggtatfff tgcttcaatt gtattaacat ttgttagttc ttttgcattt tctagttcaa  
9541 tcttatctca tatgcatcaa gtttagtattt acagattaat ttttgttatt ctttgcattg  
9601 ctctttttgt tgtaaatatt ctttatggac tttatagttt tttaatcaaa attcataatg  
9661 gtaataataa atctaataat aagccaataa caaattttaa tatgataata ttagtactta  
9721 tagtaattaa ctatttctgt tatcttgccg gatactattg aggcattttt agaatttgct  
9781 ttttaattata ataataaatt ccaaattaaa aactcaaagt caaagatatc gttagccgac  
9841 atccatttta agaagaataa tttgaaattg aagcaagatg tttaatattg gctataagat  
9901 atactacact agtaattttat tcagcgtatt tatttctttt ttaatcaatg tcttaatttc  
9961 atcttttaac atagccacca aaacttttat ttcgaattct tgcattttct tttcaacca  
10021 ttctataaga tttatcttat ctttttcttt taaaataaaa caatggatgg tatttgtatt  
10081 atctttagat agattaaaat catttaagag tttcaaaaaa gaatttttat caatattatt  
10141 ttcattaata ttgtatffff ctaaattttc aataaaataa taaaaaacta aaagcattct  
10201 ttcacctttt ccagtcgaag aatgagctaa ttttctagca aaagaatcac ctttaattt  
10261 ttgcagatgt gatgtaagtt tttctaactc tagtctacgt aaaatgtgat taaataatct  
10321 ttttgtataa gttctacaat taagttcttt tgttaatctt acaatatgat gtgcaagata  
10381 ttcattatca tcatcatagc acccctctag caatagatca tttggggtaa ctttaaaaaat  
10441 atcacataaa agcaaaattg tattaagcgg tggctcaaaa tttcctgttt ccaaagact  
10501 aatcgttctt tgtgttgtat ttagtatfff tgctagctct aactgagtta aaccacttgc  
10561 ttttcttatt ttttttagat ttcttccaaa cattttacaa ctccattttt ttgtaattat  
10621 aaaatagtat tgcttaatat atcataaatt atcttttttt tatttaattg aaatttaatg  
10681 attttttatg ttataatata tcataaaaaa ttatgaaaga gcgcgatgct aataaataca  
10741 atagtttata cagaaaagtg attttagctc aaatgaggat gggcggttgt taaattctac  
10801 tatagcaaga aaaaaacaat tatttcttta gttttattgc aaaatgattt taaaaaaaac  
10861 aatcagtcca agtatttcta tattaataag gaaaacggta catgctcaaa gatcgttttg  
10921 ataacaattc gatttattat tacttaaaaa atgaggaaaa ataatagaata tggataatat  
10981 aataatttgc aaagctagtg atcttgaaga tatctttaaa aagattttta aagaaaatga  
11041 ataatcaaa aataaaactg atgaaaattt aaatgtacaa caggcttcaa attattttaa  
11101 aataagcact tcgaaactct acaaggattg taatttagga aaaattcctt tttgtaaaat  
11161 tggaaaaaaa cttgttttta aaaaaaatga tcttgatgaa tttttaaatt ttaacagttc  
11221 taaaaatagt ttaaaatttt aatcacactt aactaaaaac ccgaaaaacc taaaaacca  
11281 ttgtaaatta gtgtttttca gttttaaaat tactaaaaat agcattttaga gtattattaa  
11341 tagtttcatt tttaatattt gcatatcttt ttgtaactcc tatgcttgaa tgtcctaattg  
11401 tttctccaat agcttctaaa gatataccca tattaatacc tatatatcct attaaatgtc  
11461 ttaagtcattg taatctaata ggagttttta acttttgatt tattttatcc caatgccatc  
11521 ttatatcttt ataagggttt ccactcttct tgataaaaaat atatccttta tttttactc  
11581 caatgctttt taaagcttct atttgtaaag aacttaacgg aaattgtaag ttttctctg  
11641 atttattttg gtttgaaggt aaaaaataaa ttttattagc aaagtcaata ttgtcccatt  
11701 ttaatgtaag aacttcactt tttcttcttc catgtaaaag aaatataaac atagctctta  
11761 tcattaattt ttcataattt ataataagctt tataaagagc atttctatcc tcatcatcaa  
11821 tagtaaaata tcttttgttt tcaaattttt gtatctctat ttctcttgct atattttttt  
11881 ctatataatc atttttaata gcaaattcaa atactggaga aagtatatct tttattgttt  
11941 ttgttgttct tggagatttg ccttgatcaa tcattttatt gacaatattt tgcataatct  
12001 ttaatttgac ttgttttatt ttgatgtttc ctataacatc ttttatatgt gcattatatg  
12061 aaaatatagt tacctcataa tgttttttag aaatagtatt ttttcgcata ctaatccatt  
12121 cttcaaacac ttcatttaat ttaggttctt taattttaaa tttctttgca aattttccat  
12181 taattctttg taaggcaatc aactcacaat tctttttaag ggtctgggtg ttatttaaaa  
12241 taggaaatat ctcataactt gatttttttc cttcataata tcttatagct agttcatatg  
12301 gtatagttaa tcttctttgt aattctacta agctaatttc ttttatatcc tccaatttct  
12361 tatctttgtc tataaaatat atacccttgt attcttttat ttttactaga ttttcaaga  
12421 ttttcttttt ttgcttttaa tttacgcata aaattttatt attttttaca taatataaaa  
12481 ttaaaaaatc actaaaaatg gtatctcaa tggatttttag tggtagcggg tttggtagcg  
12541 gtttttttct caaaatggta taaaataatg ctatttttaa gataaaacta aacaataaaa

12601 cacctatnttt tcaatacttt gataaaaaat gataacaaaa cgcattagac tcaaaatctg  
12661 gtaagggcaa cttgtgtcg gttcagatcc gacctcaggc accatttggt tttttactct  
12721 caagtgttat tttttagcaa tttatattaa aatcttaaaa aagagtttta tttttcaaa  
12781 aatagcttgc tgattatact atgtgagttt tataatatct tctaaagctt tgaaaaatca  
12841 ctaggaactt tgataatcaa tttttcattt ttaagtttaa tttcttaaat aataggtttt  
12901 attatcatag taaaaacttt ggtttaaaaa tacttttttt aaaaaatgca tagtctttat  
12961 agaaaaaact tcttgataaa ttttatttaa atttatatct actaaaattc agttgcattc  
13021 aaatgtatta cccaaattct ttaaattttc tctcttgat tgctttttta aaaccttgct  
13081 attttttcaa atcaattgga gatgtatatt ttcattaaca aatcacacct gctaaatcta  
13141 tcatttactt atttcaatct cacattcata atcatattag ataaaaagat accatcttta  
13201 tcaaagcctt ttgagtcata ttcatttttt gattgtatag tttgcatagt ttgcattaaa  
13261 gttgaaaggt tatacaaact taaactttct aatattttta tgagttctat cttgcttaaa  
13321 gtattaaaac catttaataa gctaagataa ttacttacia tagaagaaga gtgaatacta  
13381 tgaaataaaa ttttattttt tatacttttt ttaataaaaa attgattatc tttaaaataa  
13441 aaataatttc taagatgatt attacttatt atttgattat aaaaaactta aaagactttc  
13501 tttgctgttt aagtctataa aattaagata aaaattcttt tcttctaaag ctaattttta  
13561 agcattaaga ttagtaaaag aagtattaag attttcatca ttcctcaggc gccattgctt  
13621 ctcaaaactac aacttacaag gcaaaaataa ataaaaattt ttaggctgaa tttcaaatth  
13681 taactcccct ttgtgagcgt taatgatttc tttagaaagc gataagccca gccattttcc  
13741 tttgagttta gtagttctaa aagcttcaaa gaccaaaatt tcatctttta tttcacaacc  
13801 gttatcataa actctaattg ataaattttg ctcatcgcag cttgcttgaa ttttgatttt  
13861 aggattttca cactcacttt cttcgattgc atctatggca ttataaatta aattttgcaa  
13921 aaccaaagat aaaagcgtt tatctccata aattttcata tctaaaaatt tgatttcaaa  
13981 atcaatttga gatgagtaat tgtaagaatt tatagcactt tcacattctt ctgttagctc  
14041 caaaagatta aactcacttg cattgatatg cacaccctta gtaaaaagta aggtggaatt  
14101 tacgatacgc tctaccctag caatagcctt ttgaatttca agtacaatat gtttgttttt  
14161 aagctcacta cgagaaaaaa gcgtagaggc gagcaaggat atggagccta taggatttct  
14221 tatctcatgc gccaaatgtg ccgcaacact tcccatgcta gcaagtcttt cattacgctt  
14281 ttcacgcgta atatccgtag ccgaaactat agttttttca ttatctgaga tgattttaac  
14341 cgtgtagaat ctattctcaa attcaagttc atcacgattt ttttcaagac taataatatc  
14401 aagcaatcta ggctttttta aagcttcttg attttgcaa ataatattht tttccttatc  
14461 taaaacccaa agtgcggtcg gtaaaacctc gatgatccca tccaacatag cgcgcaaatt  
14521 tttatattcg ttttctacga tgtaagtttg ctctataaga cttagcaagc ctttttgaaa  
14581 ggtttccttt tcgcttgaat ctaggctttt taaaatatct tcattcatct atcttcctct  
14641 aataaaaatt taaaatcatt taaatccatc aaaagtaaat tctgtttgca aattttataa  
14701 aattctttac taaaaccatt ttttgaaatg ataataaat tatttggttc taactttaaa  
14761 gattttgctt ttgattctaa aagattttaa atatttctac aaattttttt atttttaaat  
14821 ttgacttcac cgataaaaact tatctcatca tccttataat aaagatcaag ttctaaattc  
14881 ttatcccaat aactctgcac tccactcacc tgaaatttct tttcaagcaa ttctctagaa  
14941 agttgctcaa aacaaaaact ctgataaagc tcaaatttct ctttgatcag tcttaaaacc  
15001 tcttcatatt gattttgcaa aatcaacttt tcattagggt ttaaaaagta aaaaaagaaa  
15061 cgagtaaaat ggtagcaaa aatgatttta tcttgaatca cataagatct taattctttt  
15121 ttaagttttt gtcgtttgtc ttttatcttt tttgcttctt tgctatactc aagccttata  
15181 ataccgctc ttaaaagata ttttaaagtt gataaagcct taaaatgctg aatttttcta  
15241 ttgatagaaa agcgtttgcg attattttta gctagcaagc taagagcata agaagcggtc  
15301 tcatcaagct caaaatgttc cttgatattg aaatagtttt taagtataag acattctata  
15361 ttttcaataa tatctttttc aaaatttaag ctgtctaaac tctcaaaacc ctcaaaaaca  
15421 ctataaaaat caaaaatttt agtcaaagct gaagtattgc aaatttttgc aaaatgatta  
15481 aaatttatat ttttcctttt taaaagtatt tttatagtat aatttttagca aatttttaaa  
15541 ggattatgct tgcaaatttc agatttaaaa aaagaaataa ttttaaaaaa aggcaccttg  
15601 cattttgatt ttactgccag cgccttgcca ttaaaatgcg tggaaaaaga aattgcaaaa  
15661 atactgcaa gttatgctaa tactcactct gacagttctt taaactcttt taaaactcaa  
15721 caaatttacg aacaagcacg caaagatatc aaaacaagtc tcgaactaaa cgatgatttt  
15781 gcgcttattg cttgcggttc aggctctagc agtgctatta aaaaatttca agaattactt

```

15841 ggaatttaca tcccgcact tatcaaagaa aagtattttg ataaagtgga taaaagcacc
15901 ctacccttag ttatcgtagg accttatgaa catcattcta acgagctttc tttccgtgaa
15961 ggtttatgcg aatgtataag aattccccta gacaaaaaag ggggtataga ctttgaaatt
16021 ttagaaaaag ttttaaaaga aatcaacac agaaaaatta tcgccagttt ttccttagct
16081 tcaaagtta cgggtatatt aagcgattat aaacgcattt ctaaattagt gcgtaaattt
16141 aaaggtatag tggcctttga cgcacatcaagt tttatccctt ataaaaacat agcttgcaag
16201 tattatgatg ctttatttat aagctctcat aaattaatcg gtggcatagg aggttctggc
16261 cttttggcaa ttaaaaaaga actttgtgga agcaaaccce gttttgctgc aggagggact
16321 gtgggctatg tttcgcgtac ttctcaatgc tatctttgca atgaagaagc tttagaagaa
16381 gggggaactc ctggaatttt acaattaatt cgtgcgagtc tagccttcaa aataaaagat
16441 aaaataggta tagaagaat agaaaaaaa gaagaaacct taaaagaata cttctttgaa
16501 aactaaaaa ccatacctca ttaatccta tatgctaata atataaaagc tcgcttgctt
16561 atctttgctt ttaatcga aaatatctct cttttcgact tagcctatga acttagcaaa
16621 aaataccaca tagaaacac cgcaggatgt gcttgtgctg gtccttatgg gcatgattta
16681 ttgggcttaa aagacaatga agaattaaaa accaaaccag gttggctaag aatcagttta
16741 cattacacc atgaaaaaga agatattgat tatttctttg aagcactgca aaaaagtatc
16801 acgaaattga aattttaaat atggcgcagc ggacggggct cgaaccgcg acctccgccg
16861 tgacagggcg gcattctaac cagctgaact accgctgcac ctaagaagta ataatttaat
16921 ggtggtcact ataagactcg aacttatgac atccaccttg taagggtggc gctctacaa
16981 ctgagctaag cgaccttaat ttttggcgac ccctagagga tttgaacctc tgtttccaca
17041 cagagagagt gttgtcctgg gccactagac gaaagggtct aaaccgcgata agtgggtgtcc
17101 cgtggtggat tcgaaccaac ggccccctcc ttaaaaggga gatgctctac cggctgagct
17161 aacgagacag atggcgcagc ggacggggct cgaaccgcg acctccgccg tgacagggcg
17221 gcattctaac cagctgaact accgctgcac ctaagaagta ataatttaat ggtggtcact
17281 ataagactcg aacttat

```

//

>>BfR-CA-15860\_min\_cov\_30 putative plasmid location

```

LOCUS      PIMPEBOA_1          17665 bp    DNA        linear      12-APR-2021
DEFINITION Campylobacter species strain strain.
ACCESSION
VERSION
KEYWORDS   .
SOURCE     Campylobacter species
  ORGANISM Campylobacter species
            Unclassified.
COMMENT    Annotated using prokka 1.14.6 from
            https://github.com/tseemann/prokka.
FEATURES   Location/Qualifiers
  source   1..17665
            /organism="Campylobacter species"
            /mol_type="genomic DNA"
            /strain="strain"
  gene     complement(370..1278)
            /locus_tag="PIMPEBOA_00001"
  CDS     complement(370..1278)
            /locus_tag="PIMPEBOA_00001"
            /inference="ab initio prediction:Prodigal:002006"
            /inference="similar to AA sequence:RefSeq:AJK71146.1"
            /codon_start=1
            /transl_table=11
            /product="type VI secretion protein"

```

```

/protein_id="Prokka:PIMPEBOA_00001"
/translation="MNDLASYSFFKLIKKLEKDYGRKNIFLRTNKS LKHPNKDIEKII
FSEHEQSVVLFINFMGLHGVSSQLPSFMLDKLSRNEDGEQGWTLFFDFFNHYLLWIF
FDVVS LKNYPRSFNENFKDSISQILFNILGIKEHDI AKKYL PFAPLLSLRRPKTHIE
RVLQVNF KLDKLSIIENLPHQILISDSQKNKLG IKNHTLGN NFILGDKFISYQNKIA
IYIKDISYQEAVK FMPNGTKHDDLKNSIMFLTNNEFCVDLYLKINYSSEMKFVLGDEN
TAKLGWAKILGNAQKKYTIVYMKLCE"
gene complement(1275..2996)
/locus_tag="PIMPEBOA_00002"
CDS complement(1275..2996)
/locus_tag="PIMPEBOA_00002"
/inference="ab initio prediction:Prodigal:002006"
/inference="similar to AA sequence:RefSeq:AJK71145.1"
/codon_start=1
/transl_table=11
/product="type VI secretion protein"
/protein_id="Prokka:PIMPEBOA_00002"
/translation="MKDNIFYYQKELEYLYEKREHF IKNYPKLT PFLAHD SKDPDIER
IIENLAILSSKIHQELDENIPHIAESLINIISP NYTNPLPSLCMQEFKFEQNSKENNL
IIPKGT LIKSKPIDKCVCEFKTVYDVYLYPISINEVFIS SKNQDYTFNL TLQV NKAET
KICDLGLEKINLYLGN DTYMSSTLLLYMHSY LKELKIQSLD TDEEFFLNTY NIEKIGL
NPDESSLSYNDLGFEAFS LLREYFFMPHKFNFLRINGLDILN NCQGKTINIEFKF SKP
FPANCIFRKELLSLGMTPIINIFAKSAEPLINNHKKDSYRIFVDRSQPKAYEIIQTLQ
VKAHNSEGGKRL LKNYKSFERFEFLKDNQKDFYSVNTKKN SKGEVFSEISFFSSCLID
ETISIDLLCSNGDLP SKLKIGDINTCNLKGVDTKNVEIPSE TRRCSVDGNLLWKLVS V
LSFSYQTILSKKAFFGVLESYSFLDNQSNWKIYKLLQEAIIDIQSKSTYLIDENITKK
GTVAIFSIKDSKFYTLGEVYLLGLIISKFLASFASINSFCE LKIKCLDSKEILHYPAS
FGKKALI"
gene complement(2993..3385)
/locus_tag="PIMPEBOA_00003"
CDS complement(2993..3385)
/locus_tag="PIMPEBOA_00003"
/inference="ab initio prediction:Prodigal:002006"
/inference="similar to AA sequence:RefSeq:CKG87312.1"
/codon_start=1
/transl_table=11
/product="type VI secretion system lysozyme-like protein"
/protein_id="Prokka:PIMPEBOA_00003"
/translation="MSLLDKLIHNLDEQNIHIPFYQND FEDVKNNIKVLLNAKINDCY
AVRNLGMPNMADINLNSNELCVSMAKEIRKLIDNYEKRICVVSITYD NSLSPWQLSFI
VKCFFQDDRFKEFNIEIIFKNNRYCEVK"
gene complement(3388..4842)
/locus_tag="PIMPEBOA_00004"
CDS complement(3388..4842)
/locus_tag="PIMPEBOA_00004"
/inference="ab initio prediction:Prodigal:002006"
/inference="similar to AA sequence:RefSeq:AJK71143.1"
/codon_start=1
/transl_table=11
/product="type VI secretion protein"
/protein_id="Prokka:PIMPEBOA_00004"
/translation="MANTKVIDTPIIIEQIMEKSKYSKTDESYSIAKRGVAEFISEIVK
SDNAEEKINKFALDEMI AHIDHLLSKQMDEV LHNEEFQKLESTWRGLRFLVERTDFNE
NIKIDLFDITKEEALED FENNPDITQSIVYKNIYSSEYQGFGGEPVGAIIIGDYQLGSA

```

SPDMTFLNKMASIAAMSHSPFLTSFGPKFFGLDDYSELANIQDLQGLLEGPQYTRWRT  
 FRENEDSKYTGLLVTRFLARSPYDPEENPIKSFNYKENVHASHNHLWANSSTYFCTR  
 LTESFAKYRWCGNIIGPKSGGTVKDLPTYLYENFGTIQSKIPTEVLITDRREYELAEA  
 GFITLTLRRDSNNAAFFSANSPLKPKIFQNTPEGKEAETNYRLGTQLPYIFLISRLAH  
 YLKVLQREEIGSWKERSDIENGLNEWIRQYISDQENPPSEVRSRRPFRAAQVKVDDIP  
 GEPGWYKIGLSVRPHFKYMGGNFELSLVGKLDKE"

gene complement(4844..5329)  
 /locus\_tag="PIMPEBOA\_00005"

CDS complement(4844..5329)  
 /locus\_tag="PIMPEBOA\_00005"  
 /inference="ab initio prediction:Prodigal:002006"  
 /inference="similar to AA sequence:RefSeq:AJK71142.1"  
 /codon\_start=1  
 /transl\_table=11  
 /product="type VI secretion protein"  
 /protein\_id="Prokka:PIMPEBOA\_00005"  
 /translation="MSDGSHPKERINITYKAKTNGQNEDELPLKLMVMANLKGKNE  
 TPLEEREILQINKINFQVMRKLDTTSFSVKNTLGTGAEELDVKLNIA SMKDFSPDS  
 LAKQIPELNKLLQLREALMALKGPMGNIPDFRKAVLEALKNEKTKEKLLLEIKQEEQ  
 N"

gene complement(5399..6646)  
 /locus\_tag="PIMPEBOA\_00006"

CDS complement(5399..6646)  
 /locus\_tag="PIMPEBOA\_00006"  
 /inference="ab initio prediction:Prodigal:002006"  
 /inference="similar to AA sequence:RefSeq:AJK71141.1"  
 /codon\_start=1  
 /transl\_table=11  
 /product="nucleobase:cation symporter"  
 /protein\_id="Prokka:PIMPEBOA\_00006"  
 /translation="MSFCNQLKNNLDELQEFHLLDEMSKYKTLNHNENISWDKVYQYS  
 QFILLHSLDFKVCNYFLLSCFNLNNEECFEKLLLLFQHLKLM DENNTYISAQKRKI  
 QIFIQNFIEYNTKVLVSSEIIDQFIALFSEFENLLSCNFAKIEIAQVAPQLPKSPV  
 AQVSVNIRSDNINSLNEREYKNFYQKLA FELLEEDENNLNIYALFTQAMWGKIKCLPE  
 CNNEKITKIRKPDADIIRILLSDKENDIEHIKCFMH ELLNPFWIEGVQLFCDFLEKK  
 KKNKQLDILIMLTSDFISKFDAIELLR FQNGDFICKEEVYKYFVKPKENKKSFFSSKK  
 TDKEHTLQDFEQMLMNIDKENFNNSIMNNINSLDMVKIFESKGMKKNSKILNIYLVE  
 LMEKTLKDYLAEEYENAKNKIK"

gene 6769..7215  
 /locus\_tag="PIMPEBOA\_00007"

CDS 6769..7215  
 /locus\_tag="PIMPEBOA\_00007"  
 /inference="ab initio prediction:Prodigal:002006"  
 /inference="similar to AA sequence:RefSeq:AJK71140.1"  
 /codon\_start=1  
 /transl\_table=11  
 /product="type VI secretion protein"  
 /protein\_id="Prokka:PIMPEBOA\_00007"  
 /translation="MFRKKSLLFLLPLFFCACSSVSVKINNIENSNLNRYDDVPVT  
 AIVYQLKDIKKFEEASDIDLATREDGVLGKDKLDSIKTQIAPKDNI IAVKVDEGEVPY  
 VGVLVLFANNTKKVTKIWAKTEDANGFGKNKYLKFEISKEGIKRIK"

gene 7225..8622  
 /locus\_tag="PIMPEBOA\_00008"

CDS 7225..8622

```

/locus_tag="PIMPEBOA_00008"
/inference="ab initio prediction:Prodigal:002006"
/inference="similar to AA sequence:RefSeq:AJK71139.1"
/codon_start=1
/transl_table=11
/product="type VI secretion protein"
/protein_id="Prokka:PIMPEBOA_00008"
/translation="MANKLKVAWFDGLNIGQTHFEQQERFFNRNIDLKTINIYSNLYG
IIDLEFSQEMLLQGKIALSKISGIAQDGSIFNAPEQDLLPEPIEINYESLIDSVVVLK
IPIGVTDIADLSLRNTFPNSKYICLRNSIALRNYDDSKSNAMDKIEDEYELENLFTQ
EKKDLLLASLRLKLGILGNSTPDELELPIAKIKNIDINKKIELESDFIPTCLNISKIS
TIRSFLEEIIIFSINQHKKVLSNVFKGIDQTKNTLDFSTFLSLNLLKKWYLIFSHLSKK
DKIHPEFLYEKFLFQGEAAFSNEESFLDFIPYKHDNLYNTFLNMMNLRLLFSKIT
SPKYFIAKTSINGNGFYDFIFDNSGILEDAEIYFAIRADVTTTEYLLNMFKIQSKIHTQ
SKIKNIVATQLEGLNVDQVPNIPSSIPYLNQVYVYKIDKRDHLFKDFKNESIISMVLT
NNIKNPDIIMWAVFQ"
gene      8619..9392
CDS      /locus_tag="PIMPEBOA_00009"
8619..9392
/locus_tag="PIMPEBOA_00009"
/inference="ab initio prediction:Prodigal:002006"
/inference="similar to AA sequence:RefSeq:AJK71138.1"
/codon_start=1
/transl_table=11
/product="glutamyl-tRNA amidotransferase"
/protein_id="Prokka:PIMPEBOA_00009"
/translation="MKEINEEKALSLLLLDSNFDGLKNNKIIDYSLELLLLSYRLSKI
SSMDTSNINQLRETLINKILDITAKLSMCKEYDEKEIIFKFKYCLCVFIDESLMKNELF
INFWAHNTLTVRLFDET LGGNFYDIASSWINNPFKFKDFLEFIYACLILGYKGYNE
AKDRDEKIIHFCNNIATSLRPVYKTEEELAFNKAYKIGLEENIWQKFIRLYFKLIII
VPVLIVLGVLSFAIFNLETNNLKVDNNISVLIKNLTHIE"
gene      9615..10175
CDS      /locus_tag="PIMPEBOA_00010"
9615..10175
/locus_tag="PIMPEBOA_00010"
/inference="ab initio prediction:Prodigal:002006"
/codon_start=1
/transl_table=11
/product="hypothetical protein"
/protein_id="Prokka:PIMPEBOA_00010"
/translation="MTYILLIIISTILSYLILKFIYKIIIFKSTKSVSKFLVFLGSIG
LIIFYYPYSYYLEPSYWQFRNMCKLNELPNNEEKYNKILGYFDKKGIDDFRHVKK
YGSIEMWLYIYDDTYKTPSNFQEKIEMDNIALKTKNMQMSLHKIVDMHISPYWNRTR
YVLEGNENMNFIEDELACGNLYQ"
gene      10194..10520
CDS      /locus_tag="PIMPEBOA_00011"
10194..10520
/locus_tag="PIMPEBOA_00011"
/inference="ab initio prediction:Prodigal:002006"
/inference="similar to AA sequence:RefSeq:CKG86955.1"
/codon_start=1
/transl_table=11
/product="methyltransferase small"
/protein_id="Prokka:PIMPEBOA_00011"

```



```

/translation="MTNKQLINKLRDMAELAQASYGYFDLVTHDKNDFFIKIKDEATE
SAFFNKHITQANVLDISYKNYKAYQYDSSLKKDIKIGTLKGFSPQAKRFFSRYDLL
KHCPKK"
gene      10719..10820
/locus_tag="PIMPEBOA_00012"
CDS      10719..10820
/locus_tag="PIMPEBOA_00012"
/inference="ab initio prediction:Prodigal:002006"
/codon_start=1
/transl_table=11
/product="hypothetical protein"
/protein_id="Prokka:PIMPEBOA_00012"
/translation="MGILKKVYIVFFGGGYFGELFFCLVLYMLLVI"
gene      11244..11756
/locus_tag="PIMPEBOA_00013"
CDS      11244..11756
/locus_tag="PIMPEBOA_00013"
/inference="ab initio prediction:Prodigal:002006"
/codon_start=1
/transl_table=11
/product="hypothetical protein"
/protein_id="Prokka:PIMPEBOA_00013"
/translation="MKILKSLYIIWMIFWGFGAILGYMGYDATFTKTFFFLVILYLF
PLLPYLHYLIFEKTKNKNIFISICYLLLFVITAYYFTLIYSCGTNFLTFFIMITLYM
IICSAIILWKFKINLRLYFYIILCIFTYLYIVLHIFIACYEIEWTDILLDKDVRIIYI
KEIINLLTEQ"
gene      11799..11948
/locus_tag="PIMPEBOA_00014"
CDS      11799..11948
/locus_tag="PIMPEBOA_00014"
/inference="ab initio prediction:Prodigal:002006"
/inference="similar to AA sequence:RefSeq:AAW35443.1"
/note="conserved domain protein"
/codon_start=1
/transl_table=11
/product="hypothetical protein"
/protein_id="Prokka:PIMPEBOA_00014"
/translation="MKTQINNLRDYTELAWASYFYFDLKGYLQENETIVILNELVSL
SYNGN"
gene      12158..12628
/locus_tag="PIMPEBOA_00015"
CDS      12158..12628
/locus_tag="PIMPEBOA_00015"
/inference="ab initio prediction:Prodigal:002006"
/codon_start=1
/transl_table=11
/product="hypothetical protein"
/protein_id="Prokka:PIMPEBOA_00015"
/translation="MQIPIYSKLEKLESKIDNISSQIAWFCSLILALVTYIILT
FHYIYISYGKYDKNLFLIFDRNAMELFIIIYSCIMFNLLIYNAIPLVLSAVFIFLA
FYFSSLSLIVGCCGIGVFFLISIFKRKLIPSVLLFTMGYICSYLLLHAIGTYH"
gene      12639..12791
/locus_tag="PIMPEBOA_00016"
CDS      12639..12791

```

```

/locus_tag="PIMPEBOA_00016"
/inference="ab initio prediction:Prodigal:002006"
/inference="similar to AA sequence:RefSeq:CKG86410.1"
/codon_start=1
/transl_table=11
/product="hypothetical protein"
/protein_id="Prokka:PIMPEBOA_00016"
/translation="MKYCVTIYIDPLVECFDFKFNQCYWQREDFTHAFLGLTKDKSPD
ELDKYR"
gene 12894..13319
CDS 12894..13319
/locus_tag="PIMPEBOA_00017"
12894..13319
/locus_tag="PIMPEBOA_00017"
/inference="ab initio prediction:Prodigal:002006"
/inference="similar to AA sequence:RefSeq:CKG86435.1"
/codon_start=1
/transl_table=11
/product="hypothetical protein"
/protein_id="Prokka:PIMPEBOA_00017"
/translation="MQIPIYSKLGKLESKIDNITSGQIAWFVCSVGIFIIIPMMYLY
ISNNYNQFIILFFMIFIFILNMLYTKNFFALLLLVILIFIYMKYHEFIYNFKILFFIF
APIILIFLRAWRILITFLCGYIFLVAMVYIFELLGGFYK"
gene 13316..13528
CDS 13316..13528
/locus_tag="PIMPEBOA_00018"
13316..13528
/locus_tag="PIMPEBOA_00018"
/inference="ab initio prediction:Prodigal:002006"
/inference="similar to AA sequence:RefSeq:CKG86410.1"
/codon_start=1
/transl_table=11
/product="hypothetical protein"
/protein_id="Prokka:PIMPEBOA_00018"
/translation="MKYYATIYIDPLVECFDFKFNQCYWQIEDFTHAFLGLTKGKSLD
ELDKIDKELKQEYLKNKEFKLIKSIK"
gene 13570..14028
CDS 13570..14028
/locus_tag="PIMPEBOA_00019"
13570..14028
/locus_tag="PIMPEBOA_00019"
/inference="ab initio prediction:Prodigal:002006"
/inference="similar to AA sequence:RefSeq:CKG86435.1"
/codon_start=1
/transl_table=11
/product="hypothetical protein"
/protein_id="Prokka:PIMPEBOA_00019"
/translation="MQIPIYSKLGKLESKIDNISSGQIAWFVCSVGIVYLLSIFLY
LHGVNKEGISFNRIFIIFYINHFFCFMLMWFILLNLLYKENTISLILTLTTIAYFY
NPYFAYILIFIICIIMRIINKQRWLYIYFIGLIYIYATYSIFNLRGGFYK"
gene 14025..14126
CDS 14025..14126
/locus_tag="PIMPEBOA_00020"
14025..14126
/locus_tag="PIMPEBOA_00020"
/inference="ab initio prediction:Prodigal:002006"
/codon_start=1
/transl_table=11

```

```

        /product="hypothetical protein"
        /protein_id="Prokka:PIMPEBOA_00020"
        /translation="MKYYATIYIDPLDFDKDATHAFLGLPKAKVLMs"
gene      14208..14687
        /locus_tag="PIMPEBOA_00021"
CDS      14208..14687
        /locus_tag="PIMPEBOA_00021"
        /inference="ab initio prediction:Prodigal:002006"
        /codon_start=1
        /transl_table=11
        /product="hypothetical protein"
        /protein_id="Prokka:PIMPEBOA_00021"
        /translation="MQIPIYSKLEKESKIDNITSGQIAWCLGSGYIALICAVFVW
        VYKLNLEFELYIVFFFPIILFYIAIFWFIFLSFYKNFFFIHLFCYSFMYIFNIIFND
        FYLNLVVMNILLITIWLFVVKLHLKFRFLFLMMYFCFEFAIFIGIIPYGLLEGTISK"
gene      14684..14899
        /locus_tag="PIMPEBOA_00022"
CDS      14684..14899
        /locus_tag="PIMPEBOA_00022"
        /inference="ab initio prediction:Prodigal:002006"
        /inference="similar to AA sequence:RefSeq:CKG86410.1"
        /codon_start=1
        /transl_table=11
        /product="hypothetical protein"
        /protein_id="Prokka:PIMPEBOA_00022"
        /translation="MKEIIKYYVTIYIDELLENEMLKHVDFSLLFKAKFSQISKQIDF
        THAFLGLTKDKSDELKIDEELRQKF"
gene      14946..15221
        /locus_tag="PIMPEBOA_00023"
CDS      14946..15221
        /locus_tag="PIMPEBOA_00023"
        /inference="ab initio prediction:Prodigal:002006"
        /codon_start=1
        /transl_table=11
        /product="hypothetical protein"
        /protein_id="Prokka:PIMPEBOA_00023"
        /translation="MQIPIYSKLEKESKIDNISSGQIAWFCVSVIFTYLLFLLIV
        IINTRTISFENLKFFTFEGFFKSLAFIFANHFFLFIFMWIVCIINFF"
gene      15468..15647
        /locus_tag="PIMPEBOA_00024"
CDS      15468..15647
        /locus_tag="PIMPEBOA_00024"
        /inference="ab initio prediction:Prodigal:002006"
        /inference="similar to AA sequence:RefSeq:CKG86410.1"
        /codon_start=1
        /transl_table=11
        /product="hypothetical protein"
        /protein_id="Prokka:PIMPEBOA_00024"
        /translation="MVECFLDFKNQCYWQREDFTHAFLGLTKGSPDELKIDEELRQ
        EYLNKKEFKLIKSIK"
gene      15689..16147
        /locus_tag="PIMPEBOA_00025"
CDS      15689..16147
        /locus_tag="PIMPEBOA_00025"

```

```

/inference="ab initio prediction:Prodigal:002006"
/codon_start=1
/transl_table=11
/product="hypothetical protein"
/protein_id="Prokka:PIMPEBOA_00025"
/translation="MQIPIYSKLEKLESKIDNISSQIAWFVCSVVLALVTFLIYY
FTVIEDKNLFLAIFELFQWQLFIFIIYFCIPFNLLYIHNAIPLVLSAIFMFLTYFS
SLNLFIIGCCGIGAFFLISIFKRKLMFSVLLFAMGYICIFYFFLYAITRYH"
gene 16203..17429
/locus_tag="PIMPEBOA_00026"
CDS 16203..17429
/locus_tag="PIMPEBOA_00026"
/inference="ab initio prediction:Prodigal:002006"
/inference="similar to AA sequence:RefSeq:CKG86410.1"
/codon_start=1
/transl_table=11
/product="hypothetical protein"
/protein_id="Prokka:PIMPEBOA_00026"
/translation="MIKDLLNMKGLDFTHAFLGLTKDKSPDELDKIDKELRQEYLKKN
EWDKIDQKWYAKEPNEFNDGFWGFGTGIANVAESLIGSPGKVFNNNQYVLDNNVDKN
RYIIKKLRSPQTFKPSNRCTLEISKEQYETLLANIKADFEATKEITPNSEKPIINEEFT
YKLENNCVTWVVKLSSIGIEVNPVVKDPSGLLMATKLIQSIHSIFLKFQNI DDNL
QSVKGAKAFKNWARMLINNSLMQEIYLDEYKKQYNSENLSPEQEEVLYALWNITRVYK
ILGILLSRLITKSGTKNLKGT FELIYFDKNDKQAKLLKASNHYEAI IQELDLSKKYN
NFSASKFYPFIFIPKDEMLSR TLYHKYDYGNISQEYQKDRNEFYFNV LAGEKSDKYWS
SSYHKMTKNLRKVYVS"

```

ORIGIN

```

1 gttgtagggg tgcttagatg agatgaagca ttggttaaag tatttaaaga aaataaatct
61 tgttctaaac tttcaaaaaa gccttcacat tctatagaaa aaagctcttc aagactttct
121 ttgatgaggg ctttagtgat tttaaagggt aggggatttg aagtatgatt taatatatca
181 agactcatat aagaattaag ggacattgat gatccttttg ggtttgttga tgattaatag
241 ccataagctt atgtgattta ttttagcata aggtgggtaa aataaagttt attttagggg
301 gtgggtttat gggtaaagag agattgtggg tttttgaaat aaaattttta aatatatttt
361 tgtgttaggc tattcgcata gtttcatata tactattgta tatttttttt gtgcattgcc
421 taaaattttt gcccaaccaa gtttggcagt attttcatct cctagcacia acttcatttc
481 tgaagaatag ttgattttta gatataaatc aacacaaaat tcattatttg ttaaaaacat
541 tatactatct tccaatcat catgtttggg tccattgggc ataaatttaa cggcttcttg
601 atatgaaata tcttttatat aaattgctat tttgttttga taagagataa atttatcgcc
661 caatataaag ttatttccta gggtatgatt ttttatccct agtttatttt tttgagaatc
721 tgaattaaa atttgatggg gtaaattttc aataattgat aatttatcct taagtttaaa
781 attgacttgt aaaactcttt caatgtgtgt ttaggtcgt cttaaactta gtagtaaagg
841 tgcaaatggg aatatatfff ttgcgatatc atgttcttta attcctaata tattaacaa
901 aatttgcgaa atcgaatctt tgaattttc attaaaagat cgagggtaat tttttaaact
961 gactacatca aaaaatatcc aaagcaata atgattaaaa aaatcaaaaa ataaagtcca
1021 acctgtctct ccatcttcat ttcttgataa tttatctagc ataaatgaag gaagttgcga
1081 agagactcca ttagcccca tgaattttat aaacaattct acaactgatt gttcatgttc
1141 tgaaaaaatg attttttcta tatctttatt tggatgtttt aagcttttat ttgttcttaa
1201 aatatatctc tttcttccat agtctttttc tagttttttt attaatttaa aaaaactata
1261 tgaagcaaga tcattcatat taaagctttt tttccaaagg aggcaggata atgtaaaatt
1321 tcttttgagt caaggcattt tatctttaat tcacaaaagg agttgatact agcaaaagat
1381 gctaaaaatt tagatataat caatccta ataatataacct cgcctaaagt ataaaatttc
1441 gaatctttta tactaaaaat agctacgggt cttttttttg tgatattttc atctattaaa
1501 taagtacttt tgctttgaat atcaattata gcttcttgta aaagcttata aatcttccaa
1561 tttgattggg tatctaaaaa gctatagctt tccaacacac caaaaaaagc ttttttgctc

```

1621 aatatggttt gatatgaaaa agataataca gaaacaagct tccataataa gttaccatca  
1681 aactacatc ttcttgtttc gctcggaaat tccacatfff tggatcgcac accttttagg  
1741 ttgcaggat tgatatcacc ttttttaaat tttgaaggca aatctccatt agagcataaa  
1801 agatcaatac ttatagtttc atctattaaa caagaggaaa aaaaggaaat ttcgctaaat  
1861 acctctccct tagaattcct tttggatatt acactataaa aatctttttg attatctttt  
1921 aaaaattcaa agcgttcaaa acttttatag ttttttaata gccttttacc gccttcacta  
1981 ttatgtgctt taactttagt tgtctgtatg atttcataag ctttaggttg acttctatcc  
2041 acaaaaattc tataactgtc ttttttatga ttatttataa gaggttctgc actttttgca  
2101 aagatattga taataggcgt catacctaaa gaaagtaatt cttttctaaa aatacaatft  
2161 gccggaaatg gtttgagaa tttaaattca atattaattg tctttccttg gcaattgttt  
2221 aaaatatcta aaccattgat tcttaaaaaa ttaaacttat gtggcataaa aaaatattct  
2281 ctaacaaaag aaaaagcttc aaaacctaaa tcattataag ataagctact ttcattctgga  
2341 ttaaatccta ttttttcaat attataggta ttaagaaaaa attcttcatc ggtatctaaa  
2401 ctttgaatft ttaattcttt taaataagaa tgcattgata ataataaagt gctagacata  
2461 taagtatcat tgcctagata taaattaatt ttttctaaac ctaaatacaca ttttttgtt  
2521 tctgctttat taacttgtaa tgttaaattg aaagtataat cttgattttt gctagatata  
2581 aaaacttcat tgatggagat aggataaaga tagacatcat aaactgtttt aaattcacia  
2641 acacatttgt ctatcggttt tgatttaata agagttcctt taggaatgat taaattgttt  
2701 tctttactat tttgttcaaa tttaaattct tgcatacata aagaaggtaa aggatttght  
2761 tagtttgggg aatgatatt gattagagac tctgctatat gtggatattt ttcattcaagc  
2821 tcttgatgaa ttttagaact gagaatggct aaatfttcaa taatctttc tatatcagga  
2881 tctttactat cgtgtgctaa aatggagtt agctttggat agttttttat aaaatgctct  
2941 cttttttcat atagatattc aagttctttt tggtaataaa aatattatc cttcatttaa  
3001 cctcgcaata tctattgttt ttaaagatga tttctatatt gaattcttta aaacgatcat  
3061 cctgaaagaa acattttaca ataaaagaaa gttgccaagg acttaaaactg ttgtcgtaa  
3121 tgatagaaac tacacatatt cttttttcat agttgtcaat cagttttctt atttccttag  
3181 ccattgatac gcataattca ttagagttaa gattaatatt agccatatta ggcattccta  
3241 agtttcttac agcgtaaaca tcattaatft ttgcattgag caaaacctt atattgtttt  
3301 ttacatcttc aaaatcattt tggtaaaatg gaatatgaat gttttgctcg tctaaattat  
3361 ggatcagttt atctagcagg gacattatta ttttttatct aattttccta ctaaagaaag  
3421 ttcaaaaatta ccaccatatt atttaaaatg aggtcggacg cttagtccta ttttatacca  
3481 tcctggctct cctggatatt catcaactft cacttgtgct gccctgaatg gacgacgact  
3541 tcttacttca gaaggtggat tttcttgatc ggaaatatat tgtctaattc attcattaag  
3601 accattttcg atatcgcttc tttctttcca actccctatt tcttctcgtt gtaaaacctt  
3661 taaatagtgc gccaatcttg aaattaaaaa gatatatgga agctgagttc ctagtctata  
3721 atttgtttca gcttctttac cttctggggt attttgaaat atctttggtt ttaatggaga  
3781 atttgctgaa aaaaatgccg cattattact atctcttctt agtgttaaag ttataaaacc  
3841 tgcttcagca agttcactat ctctcctatc tgtaatcaaa acttctgtag gtatttttga  
3901 ttgtatagtt ccaaaatftt cataaagata agtaggcaga tccttaacag tccctcgcct  
3961 ttttggctct ataataatft cacaccatct atatttagca aagctttctg ttaatcttgt  
4021 acaaaaagta tatgaagaat tagcccacia taaatgatta tgtgaagcat gaacattttc  
4081 tttataatta aagcttttaa tagggttttc ttcaggatca taagggtctt ttgctaaaaa  
4141 tcttgtcact agcaagcctg tatattttaga gtcttcattt tctctaaaag ttctccatct  
4201 tgtatattga ggcccttcta gcaagccttg taaatcttga atatttgcaa gttcagaata  
4261 atcatcaagt ccaaaaaact ttggtccaaa agatgttaaa aagggagaat gactcatagc  
4321 tgcaatacta gccattttat ttaaaaaagt catatcagga cttgctgac caagttgata  
4381 atctccgatg attgctccta cgggttctcc tccaaattgt ccatattctg aagaatatat  
4441 atttttataa acaatactft gtgtgatgct tggattattt tcaaaatcct ctaaggcttc  
4501 ttcttttgtt atatcaata ggtcaatftt tatattttca ttaaaatcag ttctttcaac  
4561 tagaaatcta agtccacgcc aagtagattc aagtttttga aattcttcat tatgtaaaac  
4621 ttcattcatt tgttttgaga gcaaatggct aatatgggct atcatttcat caagtcaaaa  
4681 tttattgatt ttttcttcag cattatcact ttttacaatt tctgaaataa attcagcaac  
4741 acctcttttg gcaatactat aactttcatc agtttttagag tatttgcctt tttccataat  
4801 ttgttcaata attggcgtat caattactft agtatttggc attttaattt ctttgcctt

4861 cttgtttgat ttctaaaagt aacttttctt tagttttttc attttttaac gcttctaaaa  
4921 cagcttttct aaaatcagga atattgccca taggaccttt taaagccatt aatgcttctc  
4981 ttagctgcaa taattttatt agctcaggta tttgtttagc taagctatct ggagaaaaat  
5041 ccttcatact agcaatattg agcttaacat caagctcttc agctcctggt ccaagagtat  
5101 tttttacgct aaaactcggt gttatatcga gttttctcat aacttgatca aaattgatct  
5161 tattaatttg caaaatttct ctttcctcta agggagtttc gttttttcct tttaaatttg  
5221 ccattaccat taattttaat ggcagctcca catcctcatt ttgtccatta gttttagctt  
5281 tatatgtaat attaattcgt tcctttggag catgagatcc atctgacatt ttaaactcct  
5341 aaaaaataaaa attttttagtt caattattat attaaaattt gctaaattta atcttgcac  
5401 atttaatttt attttttgcg ttttcatatt cttcagctag ataactttt agtagagttt  
5461 tttccattaa ctctactaag tatatattta aaattttaga gttctttttc attccttttg  
5521 attcaaaaat ttttaccata tctagcaagg aattaatatt attcataata gaattattaa  
5581 aattttcttt atcaatattc atcagcattt gctcaaaatc ttgtaatgta tgttctttgt  
5641 cagttttttt acttgaaaaa aaactttttt tattttcttt aggtttaacg aaatatttat  
5701 aaacttcttc tttgcagata aagtcacat tttgaaaacg gagaagttca atagcatcaa  
5761 atttagaaat aaaatcactt gtttagcatta tgagaatgtc taattgttta tttttttct  
5821 ttttctctaa aaaatcacia aagagttgca caccctctat ccaaaaagga tttaaaatga  
5881 gttcatgcat aaaacattta atatgttcta tatcattttc tttatcagaa agtaataac  
5941 gaattatata cgcacaggt tttcttattt tagtaatttt ttcattatta cattcaggca  
6001 aacatttgat tttcccccac attgcttggg tgaataaagc gtagatattg agattgtttt  
6061 catcctcttc taaaagctca aatgcaagtt tttgataaaa atttttatat tctctctcgt  
6121 ttaaggagtt aatattatcg cttctaattg ttacagatac ttgagctaca ggagattttg  
6181 gaagctgtgg tgcaacttga gcaatttcaa tttttgcaa attgcaagat agtaaatatt  
6241 caaattcggg aaacaaagcg ataaattgat caataatctc agatgataca agcacttttg  
6301 tttgtttata ttcttgaata aaattttgaa taaaaattg aatttttcgc ttttgggctg  
6361 atataataag attattttca tccataagtt tttttaagtg ttgaaaaaga agcaaaagtt  
6421 tttcaaagca ttcttcattg tttaaattga agcacgataa aagaaaatag ttacaaactt  
6481 taaaatccaa agaatgatgc aataatataa attgagaata ttgataaact ttatcccaag  
6541 aatattttt atgattttaa gtcttatatt ttgacatctc atcttcaagt aagtgaat  
6601 cttgcagctc atctaaatta tttttcaatt ggttacaaaa agacatttaa tctctccaa  
6661 aatttgctc attataatta aattttaaaa aatattatgt taatttttta aaaaaattac  
6721 ccaattaatc acaattata ttatttatag aaaggatacc ttagttttat gtttcgtaaa  
6781 aaaagcttat tttttttatt gccgttgttc ttttgtgctt gctcaagtgt tgttagtgtt  
6841 aagataaata atatagaaaa ttccaatctt aataacagat atgatgatgt tctgttaca  
6901 gctattgat atcaacttaa ggatattaaa aaatttgaag aagcaagtga tatagatttg  
6961 gccactagag aagatggggg attaggcaag gataagcttg attctattaa aacgcaaatt  
7021 gcacctaaag acaatattat cgcggtttaa gtagatgaag gagaggttcc ttatgtaggt  
7081 gttcttgtat tgtttgcaa taatacaaaa aaagtaacaa aaatatgggc aaagaccgaa  
7141 gatgcaaat ggtttggaaa gaataagtat ttaaaattg aaatatcaa agaaggcatt  
7201 aaaagaatta aataggaatg atatatggca aataaattaa aagttgcttg gtttgatggg  
7261 cttaatattg gacaaacca ttttgagcag caagaaagat tttttaatag aaatatagat  
7321 cttaaaacta taaatatata tagtaattta tatggaataa tagacttgga attttctcaa  
7381 gagatgttat tgcaaggaaa aattgcactt tctaaaattt caggcatcgc gcaagatgga  
7441 agtattttta atgcacctga gcaagattta ttaccgaac ctatcgaat caattatgaa  
7501 tctttaattg attcagttgt ggtattaaaa attcctattg gggttactga tattgctgat  
7561 ttgtctttta gaaacacttt tccaaattca aagtatata gtcttcgaaa tagtattgct  
7621 ttaagaaatt atgatgattc aaaatccaac gcaatggaca aaattgaaga tgagtacgaa  
7681 cttgaaaatc tgacttttac gcaagagaaa aaagatctac ttcttgctag tttaaagatta  
7741 aaacttggca ttttaggtaa ttcaactcct gatgaacttg aattgccaat tgcaaaaatt  
7801 aaaaatatcg atatcaataa aaaaatcgaa ttgaaagtg attttatacc tacttgttta  
7861 aatatcagta aaatatctac cataagatct tttttggaag aaatcatttt ttcaatcaat  
7921 caacataaaa aagttctatc taatgttttc aaaggaattg accaaacaaa aaatacattg  
7981 gattttagta cttttttatc tcttaatctt ttaaaaaaat ggtatttaat attttcat  
8041 ctatcaaaa aagataaaat acatcctgaa tttttatag aaaaattttt agaatttcaa

8101 ggagagcttg cagcttttag caacgaagaa tcttttttag attttattcc ttataaacat  
8161 gataatcttt ataatacttt tttaaatatg atgaataatt taagattggt attttccaaa  
8221 atcacaagtc ctaaataat ttagactaag accagtatta atggcaatgg tttttatgat  
8281 tttatTTTTg ataattcggg aatTTtagag gatgctgaaa tttatTTTTg aattcgtgca  
8341 gatgttacta cagaatatct acttaataat tttaaaattc aaagcaagat acatacgcaa  
8401 agtaaaatta aaaatatagt agcaacacag cttgaaggct taaatgtaga tcaagtacct  
8461 aatattccat ctagtattcc ttatttaaat ggttacgttt attataaaat agataaaaaga  
8521 gatcatctgt ttaaagattt taaaaatgaa agtatcatta gtatgtactt gaccaacaat  
8581 ataaaaaatc ctgatattat aatgtggcg gtatttcaat gaaagaaata aacgaagaaa  
8641 aaaaggcatt aagcttactt cttgattcaa atTTTgatgg tttaaaaaac aataaaatta  
8701 ttgattattc tttggagtta cttttgcttt cttacagact ttcaaaaata agctctatgg  
8761 atacaagtaa tattaatcaa cttagagaaa cattgattaa taaaatttta gatataaccg  
8821 ctaaactaag catgtgtaaa gaatatgatg aaaaagaaat tattaaatc aatattgtc  
8881 tttgtgtctt tatagatgaa agcttgatga aaaatgaact ttttatcaat ttttgggctc  
8941 acaatactct aactgtaaga ttatttgatg aaaccttagg tggaaataat ttttatgata  
9001 ttgcatcatc ttggattaat aatcTTTTa agtttaaaga ttttttgtaa tttatttatg  
9061 cttgtttgat tcttggttat aaaggaaaat ataatgaggc taaggataga gatgaaaaaa  
9121 taatccattt ttgcaataat attgccacat ctttaagacc agtttataag acagaagaag  
9181 agttagcttt taataaagca tacaaaattg gtttagaaga aatatttgg caaaaattta  
9241 taagattgta ttttaaaaaa cttattatca ttgtgccagt attgattgta ttaggagtat  
9301 taagctttgc aatttttaat ttagaacca ataatcttaa agtggataat aatatatccg  
9361 tattgataaa aaatttaaca catatagaat aaagatatta aattttttta aatatcaatt  
9421 tatttgtgat gagtaaaatt aaataaaaaa tattttacag ctagaataaa aatcaaatgc  
9481 aaatctaaag gataaaaata tacgaaaaaa caagctctat tttttaatg ataaagaaaa  
9541 agttatactg ctaacactaa actacaaaat tacatcttaa ttttaataaa atagagagtc  
9601 taaggagata acctatgaca tatatattac ttcttattat aatttctact attctttctt  
9661 atcttatatt aaaatttatt tataaaatca tctttaaatc tacaaaaagc gtttcaaagt  
9721 ttttagtctt tcttgggaagc ataggtttaa ttatctttta ttatactcct tattcttatt  
9781 atttagagcc tagttattgg caatttagga atatgtgtaa gttaaatgaa cttcctaata  
9841 acgaagagaa atataataag attctagggt atTTTgataa aaagttagggt gacatagatg  
9901 atTTTcgaca tgtaaaaaaa tatggtagta tagaaatgtg gctttatata tattacgatg  
9961 atacttacia aactccttca aattttcaag aaaagataga gatggataat attgcactaa  
10021 aaacaaaaaa tatgcaaatg tctttacaca agattgttga tatgcatata agtccatatt  
10081 ggaatactag aaggtatgtg ttagaaggca atgagggtaa tatgaatttt gagtttatag  
10141 aggatgagct cgcttgtggc aatctttatc aataataata taaggaataa ataatgacca  
10201 ataaacaact tattaataaa ctaagggata tggcggaaact tgcacaggca agttatgggt  
10261 atTTTgattt ggtaacacat gacaagaatg atTTTtcat taaaattaaa gatgaagcta  
10321 cagaatctgc tttctttaat aagcacatta ctcaagctaa tgtcttagat attagttata  
10381 aaaattataa ggcatatcaa tatgactcat ctttaaagaa agatattaaa attggcactc  
10441 tcaaaggcga cttctcccca ctccaagcca aacgattctt ttctcgctat gatttattaa  
10501 aacattgtcc taaaaaatga aaataaaagt atcatatttg taggacattc tctggtgggt  
10561 atttagctca aatggctttg atatatgtg attaaatata aagatttata cttttaatac  
10621 tcttagtatt tacgtttgaa atgttcctag tgtggttata ttttgatttt taaaaaaaag  
10681 taggataatt ttattaaaaa tattaaaaag gaaaataaat gggatatatta aaaaaagtat  
10741 acattgtttt ttttgggggg gggtattttg gggaattatt tttttgttta gttctttata  
10801 tgcttatttt agtgatatag aatTTTTTgg tgatatgtta aagattgcat tttttatata  
10861 ttcttatcca ttgttgcctt acatatcata tttaacacta caagaaagta ttaaattcaa  
10921 aatattttt ctttattttt ctttattttg ctttattttt ctttatctcg ggaggatttt  
10981 ttatttatgc aataatatta ggtatttata caatattatt ttttaataata tctattaat  
11041 ttagaaaaga actttcttat tatttttctt tattgttttg tttttttta tacatttttt  
11101 tgtatctttt tattttttat atagaattaa aaaatgagta ataaagctca aattaacaat  
11161 ctcaaaaatt acgctaaact tgtatagatt ggTTTTTTta atTTTttaat aataatttaa  
11221 atttcaacaa aaaaggaagt agtgtgaaaa tattaaaaag tttatatatt atttggatga  
11281 tttttggggc atttggggct atTTTtaggtt attatatggg atatgatgca acttttacta

11341 aaacgttctt ttttcttggt atattatatac tttttccatt gttgccttat ttgcattatt  
11401 taatTTTTga gaaaacaaag aacaaaaata tattcatttc tttttgttat tatctactat  
11461 tttttgttat taccgcttat tttttactt taatatattc atgtggaaca aatTTTTtaa  
11521 ctttttttat aatgattact ttatatatga ttattttagt tgctataatc ttatggaaat  
11581 ttaaaataaa ttttaagatta tttttttaca taatTTTTatg ttttttact tatctctata  
11641 tagttttaca tttttttata gcatgttatg aaatagaatg gacagatata ctgctagata  
11701 aagatgtaag gatatatatt tacaaagaaa taattaattt gcttacagag caataatttg  
11761 ttttataata aatcttattt ttatagggga ataaattaat gaaaacccaa atcaacaatt  
11821 taagagatta tacagagctt gcatgggcta gttattttta ttttgattta aaaggttata  
11881 tattacaaga aatgaaact atcgttattt taaatgagct tgtaagtta agttataacg  
11941 gaaactgata attttattga ctcggttcaa gacatagccc tatcttttaa tgacattatc  
12001 caatTTTTtc ctcttttaga ataagtagat aaaataaatg aagctaaaga gccttgtgaa  
12061 tttaatgatg atttcaagaa attttttctt actgaaacaa tcaaattttt aaataaattg  
12121 tcttataata gaataactta ttatattagg agcaaatttg caaatccta tttattctaa  
12181 actcaaagca aaactagaaa gcaaaggaat agacaatata tcaagcggac aaattgcttg  
12241 gtttgtgtgt agtttgattc ttgctttggt gacttatatt attctaactt ttcactacat  
12301 ttacattagt tatggtaaat atgataagaa tttattttta ttaatatattg atagaaatgc  
12361 aatggaatta tttattatta tatattcttg tataatgttt aatctattat atatttaca  
12421 tgccattcct ttggttttat ctgcagtatt tatatttttg gcattttatt tttctagttt  
12481 aagcttgttt attgttgggt gttgtggcat aggagtattt ttcttaatat ccatTTTcaa  
12541 aagaaaactt atacctagcg ttttgttggt tactatgggt tatatttgct catatctctt  
12601 acttcatgca attggaactt atcattagga ttttataaat gaagtattgt gtaacaattt  
12661 atattgatcc attggtagaa tgTTTTTgg atTTTaaaaa tcagtgttat tggcaaagag  
12721 aagatttcac ccacgccttt ttaggactta ccaaagataa aagtcctgat gagttagata  
12781 aatatagatg aagaattaaa acaagaatat cttaaaaaaca aagaatttaa attaataaa  
12841 agtattaagt agattggtta taataaaaca atttatctat attaggagta aatttgcaaa  
12901 ttcctattta ttctaaactc aaagcaaaac tagaaagcaa aggaatagac aatataacaa  
12961 gcggacaaat tgcttgggtt gtgtgtagcg taggtatttt tatcattcct atgatgtatc  
13021 tttatatcag caacaattac aatcaattta ttattttggt ttttatgata tttattttta  
13081 tattaaatat gctttatact aaaaattttt ttgcattatt attacttgta atattgatat  
13141 ttatatatat gaaatatcat gagtttatct ataattttta aattttattt tttatttttg  
13201 cacctataat tcttatcttt ttaagggtt ggagaatttt aataactttt ttatgcggat  
13261 atattttttt agtggctatg gtatatatat ttgagttatt aggaggattt tataaatgaa  
13321 atattatgca acgatttata ttgatccatt ggtagaatgc tttttggatt ttaaaaatca  
13381 gtgttattgg caaatagaag attttaccba cgctttctta ggacttacca aaggcaaaag  
13441 tcttgatgaa cttgataaaa tagataaaga attaaaaca gaatatctta aaaacaaaga  
13501 atttaaatta attaaaagta ttaagtagat tggttataat aaaacaattt atctatatta  
13561 ggagtaaatt tgcaaattcc tatttattct aaactcaaag caaaactaga aagcaaagga  
13621 atagacaata tatcaagtgg acaaattgct tggtttgtgt gtagttagg gatagtatat  
13681 ttgctttcta tttttttata tttgcatggc gtttaataag agggatttc gtttaataga  
13741 atatttattg cattttatat aatcatttc ttttgtttta tgttgatgtg gtttattttta  
13801 ttgttaaatt tactttataa agaaaatact atttcattaa tattaacatt attaacacc  
13861 attgcctatt tttataatcc atattttgct tatattttga ttttatcat ttgcatcatt  
13921 atgcgtataa taaataaaca aagatggctt tatatatatt ttattggttt aatttatatt  
13981 tatgccacct atagtatatt taatttaaga ggaggatttt ataaatgaaa tattatgcaa  
14041 caatttatat tgatccgcta tttgatttta aagatgctac ccatgccttt ttgggcttac  
14101 caaaggcaa agtcctgatg agttagataa aatagataaa gaattaagac aaaaatttta  
14161 agcaaattag tttataataa aacaatttat ctatattagg agtaaatgg caaattccta  
14221 tttattctaa actcaaagca aaactagaaa gtaaaggaat agacaatata acaagcggac  
14281 aaattgcttg gtgtttagggt agtggctata ttgccttaat atgtgccgtg tttgttggtg  
14341 tatataaact taagaatttg gaatttgagc tttatattgt tttttcttt cctatcttgc  
14401 tttttatat tgctatattt tggtttattt tcttaagttt ttataaaaac tttttttta  
14461 ttcacttttt ttgctattct tttatgtata tctttaatat aatttttaat gatttttatt  
14521 taaatcttgt ggtaatgaat attttattaa taacaatatg gctctttttt gttaaattac



14581 atttaaaatt tagatTTTTA tttttaatga tgtatTTTTg ttttgaattt gcgatattta  
14641 taggaatcat accttatgga cttttagaag ggactatttc aaaatgaaag aaataataaa  
14701 atattatgta acaatttata tagatgagtt attagaaaat gaaatgttaa agcatgttga  
14761 tttttcttta ctattttaaag caaaattttc tcaaatttct aagcaaactg acttcacca  
14821 cgccttttta ggacttacca aagataaaaag ttctgatgag ttagataaaa tagatgaaga  
14881 attaagacaa aaattttaaag caaattagtt tataataaaa taatttatct atattaggag  
14941 taaatttgca aatccctatt tattctaaat taaaaacaaa gctagaaagt aaaggaatag  
15001 acaatatac aagcggacaa attgcttggt ttgtgtgtag tgtaattttt acctatttat  
15061 tatttttatt aattgtaatt ataaatacta gaacaatc ttttgaaaac cttaaatttt  
15121 ttacttttga aggttttttc aaatctcttg cttttatttt tgcaaatcat tttttttat  
15181 ttatttttat gtggattggt tgtataataa atttttttta atataaaaaa ttttaattcca  
15241 ataacactaa attggataat aagctattgt tattttgttc ttgaaattaa tattttttt  
15301 attttgattt tatgtataac cctttgtggt gtattttatt ttttacaaaa aagattatta  
15361 tatacttttt tattttattt tgtttatatg gtattaactt atactttggt ttatcttggt  
15421 ggaggatttt ataaataaaa tattatgtaa caatttatat tgatccattg gtagaatggt  
15481 ttttggattt taaaaatcag tgttattggc aaagagaaga tttcaccac gccttttttag  
15541 gacttaccaa aggtaaaagt cctgatgagt tagataaaaat agatgaagaa ttaagacaag  
15601 aatatcttaa aaacaaagaa tttaaattaa ttaaaagtat taagtagatt ggttataata  
15661 aaacaattta tctatattag gagtaaattt gcaaatcct atttattcta aactcaaagc  
15721 aaaactagaa agtaaaggaa tagacaacat atcaagtgga caaattgctt ggtttgtgtg  
15781 tagttagttagt cttgctttgg tgacttttct tattatctat tttacagtga ttattgaaga  
15841 taaaaattta tttttagcaa ttttgaatt gtttcaatgg caactattta tttttatcat  
15901 atacttttgt atccctttta atctattata tattcataat gctattcctt tagtgctgtc  
15961 tgcaatattt atgtttttta cattgtattt ttctagctta aattttattta ttatcggctg  
16021 ttgtgggata ggagcatttt tcttaatatc cattttttaa agaaagctta tgttttagtgt  
16081 tttgttgttt gctatggggt atatttgtat ctattttttt ctttacgcaa taactcgcta  
16141 tcattaagga acaaaatgaa gtattatgta acgatttata ttgatgagtt attagaattc  
16201 aatgataaaa agatttgctg aatatgaaag gtttagactt caccacgct ttcttagggc  
16261 ttactaaaga taaaagtcct gatgagttag ataagataga taaagaatta agacaagaat  
16321 atcttaaaaa caaagaatgg gacaagatag atcaaaaatg gtacgaagct aaagagccta  
16381 atgagtttaa tgatggtttt tggggttttg gaactggaat tgctaattgtt gcagaatctc  
16441 ttataggatc tcctggcaaa gtatttaata ataaccaata tgtattagat aacaatgttg  
16501 ataaaaatcg ctatattatt aaaaaactaa gaagccctca aactttttaa ccctctaact  
16561 gttgcacttt agaaatttct aaggaacaat atgaaacctt acttgcaaat attaaagctg  
16621 attttgaagc cacaaaagaa atcacaccta atagcgaaaa gccaatcaat gaagaattta  
16681 cctataaact tcttgaaaat aattgcgta cttgggttgt taaaaagctt tctagcatag  
16741 gaatagaagt tgtaaatccc gttgttaaag atcctagcgg attattaatg gctacaaaat  
16801 taatacaaaag cattcattct atctttttta aatttcaaaa cattgatgat aatttacaaa  
16861 gcgtaaaagg tgcaaaagct ttttaaaaatt gggctagaat gcttataaat aattcattaa  
16921 tgcaagaat ttatcttgat gaatataaaa aacaatacaa tagtgaaaat cttagtccag  
16981 aacaagaaga agttttatat gctttatgga atattacaag ggtttataaaa attttaggca  
17041 ttcttttaag tcgtttaatt acaaaatcgg gcaactaaaa cctaaaaggc acttttgaat  
17101 taatttattt tgataaaaat gataagcaag caaagctttt aaaagcgagt aatcattatg  
17161 aggcgattat tatacaagaa ctagatttaa gtaaaaaata caataatttt agtgcgagta  
17221 aattttatcc ttttatcttt atacctaaag atgaaatgct ctcaagaacg ctttatcata  
17281 agtatgatta tggtaatatc tcacaagaat atcaaaaaga tagaaatgaa ttttatttta  
17341 atgttttagc aggagaaaaa agcgataaat attggagttc tagctatcat aaaatgacta  
17401 aaaatttaag gaaagtctat gtctcttgaa aaaatcaaag aaacgatttt tgcttatgat  
17461 aaagaagtga ttgattgtga agttttaagg gctaaaaata ttgatgtaat tcattctaaa  
17521 atttattttc aaggtatact ccttacaggc tccaccgaac tccctaataa tcctttttac  
17581 tttggagaat tagatcaaga taatactata aaacaagata taccagtta ttatttttct  
17641 cctaaagatg aaagcagtgg ttttag

//

LOCUS

PIMPEBOA\_2

7372 bp

DNA

linear

12-APR-2021

```

DEFINITION  Campylobacter species strain strain.
ACCESSION
VERSION
KEYWORDS    .
SOURCE      Campylobacter species
  ORGANISM  Campylobacter species
            Unclassified.
COMMENT     Annotated using prokka 1.14.6 from
            https://github.com/tseemann/prokka.
FEATURES
  Location/Qualifiers
    source   1..7372
            /organism="Campylobacter species"
            /mol_type="genomic DNA"
            /strain="strain"
    gene     19..489
            /locus_tag="PIMPEBOA_00027"
    CDS      19..489
            /locus_tag="PIMPEBOA_00027"
            /inference="ab initio prediction:Prodigal:002006"
            /codon_start=1
            /transl_table=11
            /product="hypothetical protein"
            /protein_id="Prokka:PIMPEBOA_00027"
            /translation="MQNLKLQIAQGLDKILEDEDRKQELYVCKFVVVNGVSENKIKAK
            NKDVNIDNDTKNINTTKSNNISSESNAQEKITHLSNDGQNLKLNIEKLRKLPYNDQN
            GKEITSYVKGATIGYGHLLIGQNEWDLYKNGITLQEADKLFKSDLLPFENAVKIQ"
    gene     725..1084
            /locus_tag="PIMPEBOA_00028"
    CDS      725..1084
            /locus_tag="PIMPEBOA_00028"
            /inference="ab initio prediction:Prodigal:002006"
            /inference="similar to AA sequence:RefSeq:CKG86986.1"
            /codon_start=1
            /transl_table=11
            /product="hypothetical protein"
            /protein_id="Prokka:PIMPEBOA_00028"
            /translation="MVIFKNILLFLFFSTYLLAQEDFTPLEQCTYENEKFWIKILNLC
            LEGNITCDKIVYGVNKNNGKYIVLNGKSISDVNMNFKGYVFKNGIYEYNIFFNNFLYI
            SKNKQIIQEYRLKLCEK"
    gene     1349..5344
            /locus_tag="PIMPEBOA_00029"
    CDS      1349..5344
            /locus_tag="PIMPEBOA_00029"
            /inference="ab initio prediction:Prodigal:002006"
            /inference="similar to AA sequence:RefSeq:AAW35464.1"
            /note="conserved hypothetical protein"
            /codon_start=1
            /transl_table=11
            /product="hypothetical protein"
            /protein_id="Prokka:PIMPEBOA_00029"
            /translation="MFISSKTELIQTIKNSTINNKEVKQIDFIYPNFSILHAILKNID
            FHQRKILFKNQILAMEILEILKQTRDNHNNIEVNIHTLNELDAGQNVNLDLSSEIC
            TKVYLEDLEEEIQDKKQGKDFNLFYHTDKNNLCIEFINTLKLAKDSEDITTLDELIE
            NIDPDDISSEKFDFFKKKVLEKIGNVIESDFFKNSISPTLKNITYEKFIDELLEHIKKL

```

AEEKEYEKIKIILSAIAGVAIATVAVL TGGAGLAILAAGL FSLMGSASEYYEFAQRD  
YGTLLTPLAAF LTRCAMFIHYINSRLLSCVLIIDKKEIIDLSGFGLYLGSDENIAS  
NLAYKITLSEEIKSIENIFSEIFLNPEQKDNESKNTANDSKSSNLLAFISTQKLSNLY  
LKNNAILKNLQEDIKQFIYFSYIESPNFNSSKLAEFFAQKNQNTQIDLNTTKMSKNYL  
IISNIPNKYNAGLSESLTQEIANYNIQDKYRTIKKNIDTSKKT YDSTRDYSEYSIEIP  
QDENEPYILQLSPFVKISKEAYENSKKAYEDMQEIIYKYL TNFVATPQKLPEFAKTAKE  
KLAISENESMIEIVKKTENLRHCERINILAYIDYNKKINDKKWL PPFYIKKFFKQNE  
KESIEEKEKKIAHQYL TFLKKELEFEKSDKSSFGNYSLDKSSFGNYSLDKSSFGNYS  
LMECLFISFVLYQAKLIFPNINLDLKKYGGSNFVYIKYLEETYVLWLTDEYPIYVNNP  
TNITAYEVVSQLLKILDKKDYSFVENDSSITIDDFNELSKDL DVTNTLDKKIILKQ  
MYHLDEQKCIKFMNLDEEAQRAFFVWMDIEKQISDLSKLL EQMYGKEYLNKAKEQKT  
SEIFTYAMLKILLSASPFISFTAQMLWDFNFKTIEYVIQACIKINKEGFEFFKEQL  
GIFTPLKKNISYHIHKS NLIKACLQQIEKELTHTKIQMILAQEIKSNLIIQKNTSD  
LNLFITKIKEYFNEKQIKIYWSDKYMKQLFIYSNQESNISKIALMHSIDIQTQKYTIY  
TYAKLNKLDLASIVAGEFVGIFLNLYL FPTNYKALQEQYESIVYQLYTFKDDSP LAVIR  
DHFITYPFAINSKFISFDLKKIFYGIDLCTGVFDTHFSFHYEIDQKLEENKEFLKRL  
LSYLIIDEKRSATALEDIKEQKYIIDDYTFYFKEKLSLELKKCTIYQLPCNHS LFKEF  
RNKEKQISAFKDEDSPIHAYNEALQILQDFANGLYIVKYE EGKCIEDKNKTRRLLK  
LNIIGQNNLKAMYMGINGNKESLKAIGKRENNTSKANINADIVSETKAPPNFIGRLAT  
TIIIEDGLYIG"

gene

5363..6631  
/gene="trxB\_1"  
/locus\_tag="PIMPEBOA\_00030"

CDS

5363..6631  
/gene="trxB\_1"  
/locus\_tag="PIMPEBOA\_00030"  
/inference="ab initio prediction:Prodigal:002006"  
/inference="similar to AA sequence:RefSeq:CKG87041.1"  
/codon\_start=1  
/transl\_table=11  
/product="thioredoxin reductase"  
/protein\_id="Prokka:PIMPEBOA\_00030"  
/translation="MSETYEIYTPNGLTLDVEKDTNKILFKENIKPTGNYTEEYSKAV  
FESYYIMKNSPYKDYKPIYLDPNFYTGKSTLLEFKEWQNIYLDPIKGS IAPWTKAE  
KAYYKSLKTKRERCKYLAIRSGLRVVIDIPYDAYCNVDEKGYLINEYAYIYDEVSS  
HRGTLKSYSFFNEWELAALLLGD MRASPTAAVGFKARQQALFLQAQFGDKNAFKSLG  
LAVLCSNSFLTGHWNKLRKMIYDLHDHYESLLDEFGMLPFLDEIIGADWTIDLNK  
YDFAYDEEGRIIWALYNDIEKGLKDPRDVDSTPESRNEFDDAMDRYENGMVTRFDVD  
TPNEWSEQQAALDRDTLVLSAKLAALTPPQGYPNAPYYFTPERLEWIYKRGYLDKLLD  
PRIPAIYRYNFPRELRAKILKFAEENGIKE"

ORIGIN

```
1 tttttaactc ctgcaaaaat gcaaaattta aaacttcaaa tcgcacaagg attagataaa
61 atcttagaag atgaagatag aaaacaagag ctttatgttt gtaaatttgt ggtggtaaat
121 ggggtagcgg aaaacaaaat aaaagcaaaa aataaagatg taaatataga taatgacaca
181 aagaatataa aactacaaa aagcaataat ataagttcta gtgaaagcaa tgctcaagaa
241 aaaatcactc atctaagcaa tgatgggtcaa aatcttttaa aaaatataga gaagctaaga
301 ctcaaacctt ataatgatca aatgggaaaa gagattactt catatgttaa aggtgcaact
361 atcggatatg gacatcttat agggcaaaaat gaatgggatt tgtataaaaa tgggtattact
421 ttacaagaag cggataaatt gtttaaaagc gatttgttac ctttgaaaa tgctgtaaaa
481 attcaataaa ctcttcctta gcacagaacg aatttgatgc cttggttata ttatgtttta
541 atatagggat tgataatttt aaaaattcct ctgttgctaa aatcatcaat ggagagaaaa
601 cgggttacia aacattaaag gaagcttgga tggcgtggaa caaaagtcaa aataaagtaa
661 tgcagaggct aattaatagg agaaatgctg aatataagct ttacactcaa ggaggttatg
721 aaaaatggta atttttaaaa atatattatt gtttttattt tttagtactt atttgttagc
```

781 gcaagaggat tttactccac tagagcaatg tacctatgaa aatgaaaagt tttggataaa  
841 aatttttaaat ctatgtctag agggtaatat aacttgtgat aaaattgtat atgtaggtgt  
901 caataaaaaat aatggaaaat atattgtcct aaatggtaag tctattagtg atgtaaatat  
961 gaatttttaa ggatatgttt ttaaaaatgg tatttatgaa tacaatattt ttaataattt  
1021 tttatatatt tctaaaaaca agcagattat acaagaatat cgtctaaaat tatgtgaaaa  
1081 atagacacaa caaaggcaac aagtaacaac aaatacctag aatgtaaaaa gttaaaaaga  
1141 tgcaataaga attacaagaa gtttttaag ttataaaaat cctaattaat gaaatccttag  
1201 ctccataaatt ttataacaaa taciaaagatt tagaagtaga gattgatgat aggggtaata  
1261 ttataagatg gataggagag attaataaag acaaaaaata ttagcaaata aaaaatgata  
1321 taataatgct ttatataagg aatcttttat gtttataagt tctaaaacag agttaattca  
1381 aactattaaa aattcaacaa tcaacaataa agaagttaa cagattgatt ttatttatcc  
1441 taatttttct attttacacg ctatattaaa aaatattgat tttcatcaaa gaaaaatcct  
1501 atttaaaaaat caaatattgg ctatggaaat actagaaatt ttaaaacaaa ctctgtgataa  
1561 tcacaataat atagaagtaa atatccatac cttaatgag cttgatgctg gacaaaatgt  
1621 aaatttaaaa gatttatcaa gcagtgaat ttgcactaaa gtttatttag aagacttaga  
1681 agaagaaatt caagataaga aacaaggtaa agattttaat cttttttatc atacagataa  
1741 aaataatctt tgtatcgaat ttattaatac tttaaaagaa ttagccaaag attctgaaga  
1801 tataacaacc ttggacgagt taatcgaaaa catcgatcct gatgatataa gcagtgagaa  
1861 atttgatgat tttagaaaaa aagttttaga aaagattgga aatgtcatag aatcggattt  
1921 tttcaaaaat agcataagtc ccactttaaa aaatacttat gaaaaattta tcgatgagtt  
1981 gttagaacac attaaaaaac ttgccgaaga aaaagaatat gaaaaatta aaatcatact  
2041 aagtgcataa gcgggtgttg caatagccac agtggtagct gttcttacag gtggggcagg  
2101 actagctatt ttggctgctg gtttattttc tttaatgggt tctgcaagtg agtattatga  
2161 atttgctcaa agagattatg gcacactttt aacgccttta gccgcatttt tagccactag  
2221 atgtgctatg tttattcatt atattaattc tcgcttgta tcttgtgttt taattattga  
2281 taaaaagaa attattgatt taagtggttt tggattatat cttggaagtg atgaaagcaa  
2341 tatcgcttca aatttagcct ataaaaaac cttaagcgaa gaaataaaaa gcatcgaaaa  
2401 tatttttagt gaaatctttt taaaccaga acaaaaagac aatgagagta aaaatacagc  
2461 taatgattca aaatcgagca atttactcgc tttcatttca acgcaaaaat tatctaattt  
2521 gtatttaaaa aacaatgcta ttttaaagaa tttgcaagaa gatattaaac aatttattta  
2581 tttttcttat atagaaagtc caaattttta ctcaagtaaa cttagctgaat ttttcgcaca  
2641 aaaaaatcaa aacacacaaa tagattttaa tacaactaaa atgagtaaaa attatttgat  
2701 tttttcaaat atccccaata aatacaatgc aggacttagt gaaagtttaa ctcaagaaat  
2761 cgccaactat aatatacaag ataaatacag aacaattaaa aaaaatattg atacttcaaa  
2821 aaaaacttat gacagcacia gagattatag cgaatatagc atagaaatac cacaagatga  
2881 aaatgaacct tatattttac aattaagccc ttttgtgaaa atatccaaag aagcttatga  
2941 gaatagtaaa aaagcttatg aagatatgca agagatttat aaatatttaa caaattttgt  
3001 tgctacaccg cagaagctac cagaattcgc aaaaacagct aaagaaaaat tagcaatc  
3061 agaaaatgag tcaatgatag aaatagtaaa aaagacggaa aatttacgac attgccaacg  
3121 aataaacatt ttagcttata ttgactacaa taaaaaata aatgataaaa aatggcttcc  
3181 ttatttttat atcaaaaat tctttaaca aaacgaagac aaagaatcca tcatagaaaa  
3241 agaaaaaaaa atagctcatc aatatttaac ttttttgaaa aaagagcttt ttgaaaaatc  
3301 ggataaatct tcaatttgaa actattcttt atcggataaa tcttcatttg gaaactattc  
3361 tttatcggat aaatcttcat ttggaaacta ttctttaatg gaatgtttat ttatttcatt  
3421 tgtcttgtat caagctaagc ttatttttcc aaatatcaat ttggatttga aaaaatatgg  
3481 aggcagtaat tttgtatata taaaatactt agaggaaact tatgttttat ggacagatga  
3541 atatccaata tatgtaaata atgagccaac aaatattaca gcatatgaag ttgtatcgca  
3601 attattaaaa atacttgaca aaaaagatta ttcttttgtg gaaaatgata gttcgatcac  
3661 tatagatgat ttttttaatg aattatcaaa agatttagat gtaacaaata cattagataa  
3721 aaaaataatc aaattgaagc aaatgtatca tttagatgaa caaaaatgca ttaaagaatt  
3781 tatgaattta gacgaagaag cgcaacgagc ttttttgtg tggatggata tagagaaaca  
3841 aatatcagat ttatcaaagc ttttggaca gatgtatgga aaagaatatt taaataaggc  
3901 aaaagaacaa aaaacaagtg aaatatttac ttatgcaatg ttaaaaattt tattaagcgc  
3961 tagtcctttt atcagcttta cagctcaaat gttgtgggat ttttaatttt taaaaacaat

4021 agaatatgtt attcaagcctt gtatttaaaat aaacaaagaa ggattttaaag aatTTTTTtaa  
4081 agaacagcctt ggtattTTTTa cacctctaaa aaagaatagt atatatcata tacacataaa  
4141 atctaatttta ataataaaag cgtgcttgca acaaatagaa aaagaattaa ctcatactaa  
4201 aatccaaatg atTTTtagcac aagagataaa atccaattta ataatacaaaa aaaatacatc  
4261 cgattttaaatt ctattttatca caaagataaaa agaatactttt aatgaaaaaac aaattaagat  
4321 ttattggagt gataaatata tgaacaattt atttatatac tccaatcaag aaagcaatat  
4381 atctaaaatt gctcttatgc atagcataga tatacaaact caaaaatata ctatttatac  
4441 ttatgctaag ctaaataaac ttgaccttgc ttctattgtg gctggagaat ttgtgggtat  
4501 tTTTTTaaat tatctctttc caacaaatta taaagccctg caagaacaat atgaaagcat  
4561 tgtttatcag ctttacacct ttaaagatga ttctcctttg gcggttataa gagatcattt  
4621 tataacttat cTTTTgcaa tcaattcaaa attcattagc tttgatttaa agaaaatttt  
4681 ttatggcata gatctttgca caggagtttt tgacactcat ttttcctttc attatgaaat  
4741 agatcaaaaag cttgaagaaa ataaagaatt tcttttaaaa agacttttgtt cttatttgat  
4801 tattgatgag aaaagaagtg caactgcttt agaggatata aaagaacaaa aatatattat  
4861 agatgattat actttttatt tcaaagagtt aaaatcttta gagcttaaaa aatgcactat  
4921 atatcaactc ctttgtaatc attctttgtt taaagagttt agaaataaag aaaagcaaat  
4981 tagtgctttt aaaaaggatg aagatagtcc catccatgct tataatgaag ctttacaat  
5041 tttacaagat tttgctaag gactttatat tgtcaaatat gaagaaggaa aatgtataga  
5101 agataaaaaat aaaaccagaa gattactaga aaaactcaat atcataggac aaaacaatct  
5161 taaagctatg tatatgggga taaatggaaa taaagaaagc ttgaaagcca taggaaaaag  
5221 agaaaataac actagcaaag caaatataaaa tgctgatatt gtatcagaaa caaaagctcc  
5281 gcctaacttc ataggtagac tagccactac tataatcata gaagatgggtt tatatatagg  
5341 ttaaattaag aaaggataaa tagtgagcga aacttatgag atttatacac ccaatggatt  
5401 aacattagat gtggaaaaag ataccaataa aatactattt aaagaaaaata ttaaaccac  
5461 aggcaattat accgaagaat attccaaagc ggtttttgaa tcttattata ttatgaaaaa  
5521 ctccccctac aaagactata aaccaatata tctagatcct aacttttata caggagagaa  
5581 atccacttta cttgaattta aagaatggca aaacatttat ttaaagatc ctataaaagg  
5641 aagcatagct cttggacta aagcagaaaa agcttattat aaatctttaa aaactaaaag  
5701 agaaagatgt aagtatttgg caataagaag tggattaaga tctgtgggtt tagatatacc  
5761 ctatgatgct tattgtaatg tagatgaaaa aggatattta atcaatgaag aatagccta  
5821 tatttatgat gaagtaagt ctcatcgtgg aacattaaaa tcttattctt tctttaatga  
5881 atgggaatta gctgctttac ttctaggaga tatgagagct agtcctacag ccgctgtagg  
5941 atttaaagca agacaacaac aagctttatt tttacaagct caatttggag ataaaaatgc  
6001 ttttaagagt ttaggtttag cagtattgtg ttctaattct tttcttacag ggcaacattg  
6061 gaataagcct agagcaaaaa tgatttacga tttcacgat catcattatg agagtttgtt  
6121 agatgaattt ggtatgctac cttttttaga tgagattata ggagcagatt ggacgattga  
6181 tttaaataaa tatgattttg cctatgatga agaaggtaga atcatttggg ctttatataa  
6241 tgatattgaa aaaggcaaat taaaagatcc aagagatgtg gattctactc ctgaaagtag  
6301 aaatgaattt gatgatgcta tggatagata cgaaaatgga atggtaacta gatttgatgt  
6361 agatactcca aatgaatgga gtgaacaaca agctgcttta gatagagata ctttagtatt  
6421 aagtgccaaa ctgcagccc tactcctcc acaaggctat cctaagccc cttattattt  
6481 tacacctgaa agattagaat ggatttataa aagaggatat ttagataaac tccttgatcc  
6541 aagaattcct gctatttata gatataattt cccaagggaa cttagagcta agatactcaa  
6601 atttgctgaa gaaaatggca ttaaagaata aagtaattgc ataggcagac tagccactac  
6661 tataatcata gaagatgggtt tatacatggg ataaatttaa gaaaggataa ataatgagcg  
6721 aaacttatga gatttataca cccaatggat taacattaga tgtggaaaaa gataccaata  
6781 aaatactatt taaagaaaat attaaacca caggcaatta tactcaagaa tattccaag  
6841 cggttttttaa atcttattat attatgaaaa actcccccta caaagactat aaaccaatat  
6901 atctagatcc taacttttat acagggcaaa aatccactct agtagaattt aaagaatggc  
6961 aaagcatata tttaaaagat cctatcaaag tagctcaaaa tatcacaat atttgtatta  
7021 attatgtaaa aaaaggtttt aaagaagttt taatcgaaca acttggcatt atatatattat  
7081 taacacatcc acaaatcgaa gttgaagtta agaaatatgg aaaaaaatat ttttaagacta  
7141 taaacaagga aattgctgca aaaagatttt ctacaattaa agaagaatta tttttcaata  
7201 aaacaaaaat atcctttatg gcagaacaag taaaaaacgg tattgattat gaaatagatc

7261 aaaagcttga agaaaataaa gaatttcttt taaaaagact tttgtcttat ttgattattg  
7321 atgagaaaag aagtgcaact gcttttagagg atataaaaaga acaaaaaatat at

//

LOCUS PIMPEBOA\_3 4049 bp DNA linear 12-APR-2021

DEFINITION Campylobacter species strain strain.

ACCESSION

VERSION

KEYWORDS .

SOURCE Campylobacter species

ORGANISM Campylobacter species

Unclassified.

COMMENT Annotated using prokka 1.14.6 from  
<https://github.com/tseemann/prokka>.

FEATURES Location/Qualifiers

source

1..4049

/organism="Campylobacter species"

/mol\_type="genomic DNA"

/strain="strain"

gene

complement(403..3918)

/locus\_tag="PIMPEBOA\_00031"

CDS

complement(403..3918)

/locus\_tag="PIMPEBOA\_00031"

/inference="ab initio prediction:Prodigal:002006"

/codon\_start=1

/transl\_table=11

/product="hypothetical protein"

/protein\_id="Prokka:PIMPEBOA\_00031"

/translation="MKIKNFTLITSNHNLKIELKNLTKNANKIIFICSDFDGYKEAEN

SLYKTLHTIEDNFKIDNTKTFKIIHLNQTNKDEITKEQKFSSDKNLSIIKKIYNNLK

LLNDTINQENKTLNKIIDESNEKNIENFLKEIQKELNILLKNIKESNYFDQEIKPKI

QVTLDTLFNTLLKNIAQSNDDDEYKQIIRAVAKFFINILDSITSLLKPKISLIKKNPYVL

IVNTLFEAYNSYSEYQEYKEKKYYYDFAYPLLELITSKLYPIIALCNEEILSDVLIID

DKVLLDFSSYTNAPSISLYKNSFYKIIILDEEFQGVFDNFLNLLKFENEKLDNTLLVN

SSLNNSDITLKKAINLNISKLNHFFYAEPDLNSSLMLVEMILDKKNADQINTTKMGKN

YLFITNPPQLNAGLCELDYQKKLGAIKRNPKALTKNEKLALKGDFPSKRDYGSYFI

ERDVKKEDDFVLQCPFAKLDGQIYQYKGYFNFYNTYSWMKLYLLEYINERFEYER

FKQDFAYIDNFFKLPKELEKISEKEKEKVEYVELFNDYLDKINFRYDQIQFFLQSEP

LMFKTYENVDFKKYSPLTVVLLTLTYVLQKDLAFTQEYSLGVKNIAIPNPDYGDKEI

SLNYQRIKIPNYFNEYILFIPDDIYFYDNDKKIYIFLSKELNKNKKEDEVIYLDLAK

AMFENDLKEDDQTYVKFLNTLNENFDDEIEFEENIQTNTLPTKKDLKSIQEIMLDN

ELAKLSLDITFFNIKQLFPFTEFFMSQPDFFKKMILFFINSSDKKYYGNKLFSSFK

AHFFKELGIFYALNPKGRFIKIIIPKNKKPFNKLFYQIGTNYFFSQSEYASELKSK

SFSRLDKAKQIHLISKARKQLAIDFSIKVSKNLSADVLKNLAGSFIDTLLPTNYERLK

ILYEKLMYEKLTNYDFPLAVKKEEYITYPLLINSRFFMSFDLSEFIFGSLCTGGLNY

YPSIACITTSSEAREFALKRLLSYIILDEKRSAFMEDKINEGKYIINDKEFFEKNIE

LRNCNIYKLEHFQRKEEYKTQNPMIKQHPILAYNDTIQILYEYINGIYNTIQDEKGNF

IEDRQKARLMENLETIGQHNLEVMYKGINEENDETEKIISQNKRHYKNIENLITNKK

SQDYSNKFIGRLATTIIMEDGLYMG"

gene

complement(3915..4031)

/locus\_tag="PIMPEBOA\_00032"

CDS

complement(3915..4031)

/locus\_tag="PIMPEBOA\_00032"

/inference="ab initio prediction:Prodigal:002006"

/inference="similar to AA sequence:RefSeq:CKG86393.1"

```
/codon_start=1
/transl_table=11
/product="methyltransferase small"
/protein_id="Prokka:PIMPEBOA_00032"
/translation="MQNLKLQIAQGLDKILEDEDRKQELYVCKFVVVNGVKV"
```

ORIGIN

```
1 ttcttatacc acttcttata actaaatatt tatacttttc ttttttagtt ttttagtgagt
61 tataataagc tttttctgct ttagtccaag gagctatgct tcctttaatg ggatctttta
121 aatatatact ttgccaatct ttaaattcaa gcaaagtgga tttttgccct gtgtgaaatt
181 caggatctag atacctaggt tgataattaa tataaggaga ggttcttaaa attctatcgg
241 cttcaaacia agcttttagaa tattcttggg tgtatttgcc tgtaggtttt tttgactttg
301 actctgaaaa tagtattttt ccgctttggt tatctacatt taatataaaa ccttcggggtg
361 tataaatttc ataagtttca ctcatTTTTtA tcctttctta atttatcca tatataaacc
421 atcttccatg attatagtag tggctagtct gcctataaac ttattagaat aatcttggga
481 tttattattg gtaattaaat tctcaatatt tttataatgt cttttgtttt gcgatattat
541 tttttctggt tcatcattct cttcatttat ccccttatac atcacttcta aattatgttg
601 tcctatgggt tctaaatttt ccatcaatct tcttgctttt tgcctatctt ctatgaaatt
661 acccttttca tcctgtatag tattgtaaat tccatttatg tattcatata aaatttgtat
721 agtatcatta taagctaaga taggggtgtg ttttatcata ggattttgtg ttttatactc
781 ttcttttctt tgaaaatggt ctagcttata tatattacaa tttctaagtt ctatattggt
841 tttttcaaaa aattccttat catttaagat atatttgccc tcattgattt tatcttccat
901 aaaagcactt cttttctcat ctaaaataat ataagataaa agtcttttta aggcaaattc
961 tctagcttca cttgaagttg tagtgcaagc aatactagga taataattaa gccacactgt
1021 gcacaataaa gaaccaaaaa taaactcaga taaatcaaaa ctcataaatc tagaatttat
1081 caataaagga taggttatgt actcttcttt ttttacagct aaaggaaaaat cataattgta
1141 agtcaatttt tcatacatta gtttttcata taaaattttt aatctttcat aattttagg
1201 caaaagtgta tcaataaaag aacctgctaa attttttaat acatccgcac ttaaattttt
1261 acttacttta atagaaaaat caatagctaa ttgttttctt gcttttgata tcaaatgaat
1321 ttgcttagct ttatccaatc ttgaaaaact ctttgatttt ttcaactcgc ttgcatattc
1381 tgattgacta aaataataat aatttgttcc tatttgatat aaaaaaagct tattgaatgg
1441 ctttttattt tttgggatga tttttataaa acgcccttta ggattaagtg cataaaatat
1501 ccctagttct ttaaaaaaat gtgcttttaa actagaaaaat aatttattgc cataatactt
1561 tttatcagag cttgaattta taaaaaataa aatcattttt ttaaaaaaat caggctgact
1621 cataaaaaat tctgtaaaag gaaaaagttg cttaatgata ttaaaaaaag tgatatctaa
1681 ggatagtttt gcaagctcat tatcaagcat aatttcttga atacttttat ctaaattcctt
1741 tttttagtagga agtgtttgat ttgtttgat attttcttca aattcaattt catcatcaaa
1801 gttttcattt aaggtgttta aaaatttcac ataagtttga tcatcttctt taagatcatt
1861 ttcaaacata gcttttagcta attcatctaa atagatgact tcatcttctt ttttattttt
1921 atttaactct ttggataaaa agatgtaa atttttatca ttatcataaa aataaatatc
1981 atcggggata aataagatat actcattaaa ataatttgggt attttaatcc tttggtaatt
2041 aagtgaatt tctttatcgc cataatctgg atttggaatt gcaatatttt taacaccaag
2101 agaatattct tgcgtaaaag ctaagtcttt ttgtaaaaca tacaagttta aagtcaataa
2161 aacaaccggt aaaggtgagt atttctttaa atctacattt tcatatgttt tgaacattaa
2221 tggttctgag ccaagaaaga attgtatttg atcataacga aaattgatct tatccaaata
2281 atcattaaaa agctcgacat attctttttac tttttctttt tctttttcgc taattttctc
2341 aagctcttta ggtaatttaa aaaagttatc aatataagca aaatcttgtt taaatctttc
2401 atattcaaat cgttcattta tatattctaa taaataaagt ttcattccaag aatattgttg
2461 attataaaaa ttaaaatatt ccttatattt ttgataaatc tgtccatcaa gtttcgcaaa
2521 aggacaaagt tgcaagacaa aatcatcttc ttttttaaca tctctttcta taaaataaga
2581 accataatct cttttgctag gaaaatcgcc ttttaatgca agtttttcat tttttgtaag
2641 agctttgggg cgatttttta ttattgctcc taattttttt tgatacaaat cttcgcaag
2701 ccctgcatta ttaagctgtg gtggattgggt aataaataaa taatttttac ccattttggt
2761 tgtattgatt tgatcagcat tttttttatc cagtatcatt tctactagca tggagaatt
2821 taaatcaggg tattctgcat aaaagaaatg attgagtttg gagatattta aatttatcgc
```

```

2881 cttttttaat gttgtgtcag aattatthta actagaattc actaaaagag tgttgtctaa
2941 tttttcattt tcaaatttta gattatthtc taaaaaatta tcaaaaacac cttgaaattc
3001 ttcatctaaa ataattttat aaaaactatt tttataaaga ctgatagaag gtgcattagt
3061 ataagatgaa aaatctaata atactttatc atctataatt aacacatcag ataaaatctc
3121 ttcatgtcat aaagcaataa taggataaag tttgctagtg ataagttcta aaagtggata
3181 agcaaaatca taataatatt ttttttcctt atactcttga tattcagagt aagaattata
3241 agcttcaaat aatgtattta caatcaaac ataaggattt tttttaatta aagaaatggg
3301 ctttttaagg ctggttatag aatctaatat attgataaaa aatttcgcta cagctctaat
3361 aatttgctta tattcatcat cattagattg ggcaatattt tttaaaagtg tgttaaaaag
3421 cgtatctaaa gtaacttgta tctttggcct gatttcttga tcaaaaataat tagattcttt
3481 gatatttttt agtaatatat ttaattcttt ttgaatttct tttaaaaaat tttcgatatt
3541 tttttcattg ctttcatcaa taattttatt gagtgtttta ttttcatttt gattgattgt
3601 atcattttaa agttttaaat tattatagat aattttttta atgctagata aattttttatc
3661 agagctaaat ttttgttcct ttgtgatttc gtctttattg gtttgattta aatgtatgat
3721 tttaaaagtt tttgtattgt caattttaaa attatcttca atagtatgta atgttttata
3781 cagagaattc tcagcttctt tatatccatc aaaatcactg catataaaaa taattttatt
3841 agcatttttg gtaagatttt ttaactcaat ttttaatta tgatttgatg taattaaagt
3901 aaaatttttt attttcatac ttttaaccca tttaccacca caaatttaca aacataaagc
3961 tcttgttttc tatcttcac tcttaagatt ttatctaac cttgtgcgat ttgaagtttt
4021 aaattttgca tttttgcagg agttaaaaa

```

//

LOCUS PIMPEBOA\_4 3161 bp DNA linear 12-APR-2021

DEFINITION Campylobacter species strain strain.

ACCESSION

VERSION

KEYWORDS .

SOURCE Campylobacter species

ORGANISM Campylobacter species  
Unclassified.

COMMENT Annotated using prokka 1.14.6 from  
<https://github.com/tseemann/prokka>.

FEATURES

```

Location/Qualifiers
source      1..3161
            /organism="Campylobacter species"
            /mol_type="genomic DNA"
            /strain="strain"
gene        368..550
            /locus_tag="PIMPEBOA_00033"
CDS         368..550
            /locus_tag="PIMPEBOA_00033"
            /inference="ab initio prediction:Prodigal:002006"
            /inference="similar to AA sequence:RefSeq:CKG87535.1"
            /codon_start=1
            /transl_table=11
            /product="methyltransferase small"
            /protein_id="Prokka:PIMPEBOA_00033"
            /translation="MPHRGRHPNEYHEYILEKMNKIDKIARGDKNKFLKEFEKLKEEI
            KNNPAILRKEYYKERK"
gene        550..1116
            /locus_tag="PIMPEBOA_00034"
CDS         550..1116
            /locus_tag="PIMPEBOA_00034"
            /inference="ab initio prediction:Prodigal:002006"
            /inference="similar to AA sequence:RefSeq:CKG87555.1"

```



```

/codon_start=1
/transl_table=11
/product="hypothetical protein"
/protein_id="Prokka:PIMPEBOA_00034"
/translation="MRYYKMMYNGQHNDVDNWINCVPDIKNNDKYALLESKPITNWQ
TPTFEIDKDDGKILDLISNVYNWRIVSPKFINLMQDLIKDCVQYLDVEIRSQEINYY
DCKIMHVTKSLEALDYEHSVYTYMGDNDEYLSITKAVLKKSKLDGSHIFRIKDDEIPV
FVSNEFRKRVRENNLLGFSFSEVMVYEN"
gene 1199..1750
/locus_tag="PIMPEBOA_00035"
CDS 1199..1750
/locus_tag="PIMPEBOA_00035"
/inference="ab initio prediction:Prodigal:002006"
/inference="similar to AA sequence:RefSeq:CKG87579.1"
/codon_start=1
/transl_table=11
/product="hypothetical protein"
/protein_id="Prokka:PIMPEBOA_00035"
/translation="MTREQAELIIKEEKLIIDTDWYPSYKHSGEYHLMWFSDSDNNKYE
AVYIGERGSVEFEYSFDSEKEAIDKMLQMNYEQKKYDGDIKGYLTKEVALRIIKEEN
LEVIWYDEALKPLCAGIKHDKQRDKYISFITNAKAEIIEYRSIEFDGDEEFEGKIYND
EDIALYALINRARMIKQNKISFV"
gene 1821..2171
/locus_tag="PIMPEBOA_00036"
CDS 1821..2171
/locus_tag="PIMPEBOA_00036"
/inference="ab initio prediction:Prodigal:002006"
/inference="similar to AA sequence:RefSeq:CKG87641.1"
/codon_start=1
/transl_table=11
/product="hypothetical protein"
/protein_id="Prokka:PIMPEBOA_00036"
/translation="MEDLKLLQRRWEEAYEAMPKLYETPDELIINFTLSEDTDTILFK
EPWENFELDDDEDKEVKWRLSFFSISKDEPLGYLEYKEALEKLQDFSLIQSEERILIKA
MSLEELESLELKGW"
gene 2171..2803
/locus_tag="PIMPEBOA_00037"
CDS 2171..2803
/locus_tag="PIMPEBOA_00037"
/inference="ab initio prediction:Prodigal:002006"
/inference="similar to AA sequence:RefSeq:CKG87668.1"
/codon_start=1
/transl_table=11
/product="hypothetical protein"
/protein_id="Prokka:PIMPEBOA_00037"
/translation="MLPQPIFLNKLIELLSDENLDIVNMKKGVDKIFSKKDFYAI LEL
NIKIMNIAKLIFKSDEKLNILLPQISDHKNINYFLQELELKKEMDVNLDLKNYDNKK
IIEI IKQKYQNNPVKELDINSQKEKIKILFIVNEVPKFLKSIYKECKFKEYGLANYLE
FDEIWDIFYENNTYFAILTPMGANKIKLRLENTQNSEKELNIEVNLDDK"

```

ORIGIN

```

1 cttgaaggtg cagcaattgt aaaactaatg aatttagata aagaagaatt taaacaatac
61 aaatactttc cttatgattt aatttaatat tagtgggttt aaaaaccac aaggcttttc
121 atggctagaa tttgctatac ctaaaaagaa taagattcaa tttgctttag ctaaaatata
181 agctagtcct cttgctaaga ttgagtatga taggataaga tgggaaggga taggaggtaa

```

```

241 aagaaatcaa ttaccaatcc aaacccatca cattgctact gataagagta aaaaatatac
301 tccaaaatth caagagatac ttaatthata tgatthaaaa ctaaattggag attggaataa
361 agthaaatg ccacatcgcg gaagacatcc caatgaatat catgaataca thcttgaaaa
421 aatgaataaa attgataaaa tagctagagg ggataaaaaat aaattcttaa aagaatttga
481 aaaactaaaa gaagaaatca aaaataatcc tgctatactt cgtaaagaat actataagga
541 gagaaaataa tgagatatta taaaatgatg tataatggac aacataatga tgtcgataat
601 tggataaatt gtgttaaacc agatataaaa aataacgata aatatgcact thtagaatct
661 aaacctatta caaattggca aacacctaca thtgaaatcg ataaagatga tggtaaaata
721 ctgactgatt taatatctaa tgtatataat tggcgtatag tctctcaaaa thttataaat
781 thaatgcaag thttaatcaa agattgtgtg caatthttag atgtagaaat tagaagtcag
841 gaaataaatt thtatgattg taaaattatg catgtaacaa aatcacttga ggctthtagat
901 tatgaacatt ctgtatatac thtatgggt gataatgatg aatthttaag cactactaag
961 gctgtthtaa aaaaatcaaa acttgatgga agtcatatat thtagaattaa agatgatgaa
1021 atacctgtht thgtatcaaa tgaatthaga aaaagagtga gagaaaacaa thttattaggth
1081 thtagththt gtgaagtht ggtatatgaa aatthataaa catataaaaa thttataatc
1141 ataaattata thaaacttht aggtthttatc aaacaaatac cataataaag gatagaaaat
1201 gacaagagaa caagcagaat taattataaa agaagaaaag thgattgata cagattggta
1261 thctthctat aaacattcag gagaatacca thttactatg tggthtgatt ctgataataa
1321 thaaatacgaa gctgtthtata thggagaaag aggcagtgtt gaatthtgagt thctthttga
1381 tagtgaaaaa gaagctattg ataaaatgtt gcagatgaat tatgaacaaa aaaaatacga
1441 tggaaaagac thtaaggat atctaacaaa agaagtagca ctaagaatca thcaagaaga
1501 aatctagaa gtgattthgt atgatgaagc actthaacct thtatgtcag gtathaaaca
1561 cgataaacia agagataaat acathcttht thtactaat gctaaagcag agattataga
1621 atacagaagt thtgagthtg atggggatga agaathtgaa ggaaaaatath ataatgatga
1681 agatathacc thttatgctc thtatcaatcg tgccagaatg thtaagcaaa athaagattg
1741 thttgtgtaa atactthctc thtgattthaa ththaaaaaga ththttagctath taatthcatt
1801 thtatththaa ggaaaaatth atggaagatt thaaaacttht acaaaggcgt tgggaagaag
1861 thtatgaagc thtgcctaaa thttatgaaa caccggatga gthtaataath aatthcacc
1921 thagtgaaaga thacagathct thtctththt aagaacctg ggaaaaattht gaattagatg
1981 atgaagataa agaagthcaa tggagactaa gththththt cattagthaa gatgagcctt
2041 tggggthttt agagthataa gaagctthtag agaaattgca agaththtct thaatthcaat
2101 cagaagaaag aatththatt aaagcathga gththagaaga gcttgaaagt thtagactth
2161 aagggtggth atgctthctc aacctathat ththaaataaa thttatagaat tgtthctgath
2221 tgagaattht gatathgtaa atatgaaaaa aggcgtagat aaaaatththt thaaaaaaga
2281 ththtactgct athactagaat thaatathcaa aatthtgaat athgcaaaat thaatththaa
2341 aagtgatgaa aatthaaata thttathacc acaaththct gatcataaga athataaatha
2401 ththctthcaa gaattagagt tgaaaaaaga aatggatgtt aatctthathg ththaaaaaa
2461 thacgataat aaaaaaataa tagaaataat thaaacaaaa thtcaaaaca atccggtthaa
2521 agaattggat thtaattctc aaaaagaaaa aatcaaaata ththththttg thaatgaagt
2581 accaaaatth thaaaatcaa thtataaaga atgcaaatth aagaathatg gattagcaaa
2641 ctaththgga thtgatgaaa thtgggattt thtatgaaat aathactagat ththttgctath
2701 ththactcct atgggtgcaa ataaaataaa atthgcgttht gaaaatacac aaaaacgca
2761 aaaagaactc aathatcatag aagthaaatth agataaaaaa thaatththaa thaaacaaaat
2821 aagcaatthc thththctac thcaaththtag actathctgtg ththaaatath thctthataga
2881 ththaaaaaca thttataataa tagaaaactt aatgagththt cacthaaaac thacaacaaac
2941 ccaaaaggat catcaatgth cththattct thtatgagthc thgtathatth aathcathct
3001 thcaaatccc thaccctthaa aathcathaa gcctthcatca aagaagthct tgaagagctt
3061 ththctathg aatgtgaagg ththththgaa agththagaac aagathththt thctththaaat
3121 actthaacca atgctthcat thcatthagc accctthaaa c

```

//

LOCUS PIMPEBOA\_5 2630 bp DNA linear 12-APR-2021  
DEFINITION *Campylobacter* species strain strain.  
ACCESSION  
VERSION

KEYWORDS .  
 SOURCE Campylobacter species  
 ORGANISM Campylobacter species  
 Unclassified.  
 COMMENT Annotated using prokka 1.14.6 from  
<https://github.com/tseemann/prokka>.  
 FEATURES Location/Qualifiers  
   source 1..2630  
           /organism="Campylobacter species"  
           /mol\_type="genomic DNA"  
           /strain="strain"  
   gene 28..552  
           /locus\_tag="PIMPEBOA\_00038"  
   CDS 28..552  
           /locus\_tag="PIMPEBOA\_00038"  
           /inference="ab initio prediction:Prodigal:002006"  
           /codon\_start=1  
           /transl\_table=11  
           /product="hypothetical protein"  
           /protein\_id="Prokka:PIMPEBOA\_00038"  
           /translation="MLLCFALYLPRLFNPSKEIDYKWFIVFFTFLLGIYAFARAIYK  
 MANIKRIYITKEKLVIEYYIKNDLVFPLGTFVYYRKISYSLSPGHIVIYTFGDKVKE  
 YLEPGLFSDGDDPTKGC FERINAI IKPHVMPYLLSLSDEEFKIF FHV NATSKIDTTF  
 LKEAMELRKEKKDE"  
   gene 603..1241  
           /locus\_tag="PIMPEBOA\_00039"  
   CDS 603..1241  
           /locus\_tag="PIMPEBOA\_00039"  
           /inference="ab initio prediction:Prodigal:002006"  
           /codon\_start=1  
           /transl\_table=11  
           /product="hypothetical protein"  
           /protein\_id="Prokka:PIMPEBOA\_00039"  
           /translation="MSEINNTEIKEQDTQDEIIWEGKKHIPSFLFWITYIVLLCFA  
 LYLPRLFNPSKEIDYKWFIVFFTFLLGIYAFARAIYKMANIKRIYITKEKLVIEYYI  
 KNDLVFPLGTFFIYRQISYSPSPGHIVIHTFGDKAKEYLEPGLFSDGDDPTKGCCEK  
 INAI IKPHVMPYLLSLSDEEFKIF FHV NATSEIDTTF LKEAMELRKEKKDE"  
   gene 1234..1386  
           /locus\_tag="PIMPEBOA\_00040"  
   CDS 1234..1386  
           /locus\_tag="PIMPEBOA\_00040"  
           /inference="ab initio prediction:Prodigal:002006"  
           /codon\_start=1  
           /transl\_table=11  
           /product="hypothetical protein"  
           /protein\_id="Prokka:PIMPEBOA\_00040"  
           /translation="MNENIYGSLELYSKETQSTPSDKRDLGVFGDVAPYALGITEGFA  
 TKAFKG"  
   gene 1390..2007  
           /locus\_tag="PIMPEBOA\_00041"  
   CDS 1390..2007  
           /locus\_tag="PIMPEBOA\_00041"  
           /inference="ab initio prediction:Prodigal:002006"  
           /codon\_start=1

```

/transl_table=11
/product="hypothetical protein"
/protein_id="Prokka:PIMPEBOA_00041"
/translation="MNSTLPWKSkrkfyflailqyiiylalglfvcwfcwfvllkes
LWYGFFAFGSLYYVfELHRALnfKSIILTEQGLILKMRWFDTEIFYPYGSFTMSYDIA
YGIRFFERIEIQNIKHirKEFIpCGVDSFGSFENNHTfKELCTKYtQKALETmNLEE
KVNLYKLYRANIKIFFNQEIDHNvFIIDFSPYIQEIKLNLKDKNE"
gene complement(2347..2496)
/locus_tag="PIMPEBOA_00042"
CDS complement(2347..2496)
/locus_tag="PIMPEBOA_00042"
/inference="ab initio prediction:Prodigal:002006"
/codon_start=1
/transl_table=11
/product="hypothetical protein"
/protein_id="Prokka:PIMPEBOA_00042"
/translation="MALILSKQPFVgSSPSLNKPGSRYSltLSPKvYITISPGFDMDG
SDELR"

```

ORIGIN

```

1 tttttgcttt tttggataac atatattgtg cttttatggt ttgcgcttta tttgtttcct
61 agattattta atcctagcaa agaaatagat tataaatggt ttatagtttt ttttacattt
121 cttttaggca tatatgcatt tgcacgagcg atctataaaa tggcaaatat taaaagaatt
181 tatatcacia aagaaaaact tgtgattgag tattatatca aaaatgattt ggtttttcct
241 ttaggaactt tttttgtgta ttatcgtaaa atttcatatt cactttctcc aggacatata
301 gtgatataca ctttcggaga taaagtcaaa gaataccttg aacctggttt attcagtgat
361 ggcgatgata caacaaaagg ttgttttgaa agaattaatg ccattataaaa acctcatgta
421 atgccttatt tattaagcct aagtgatgaa gaatttgaaa aaatcttttt ccatgtaaac
481 gctactagta aaattgatac cactttcctt aaagaagcaa tggaaactcag aaaagagaaa
541 aaagatgaat gaaaatattt tattttatat acaagagatt aaaacttatt taaaggataa
601 aatgagtga aataaacaat aacacagaaa tcaaagagca agacacccaa gatgaaatca
661 tttgggaagg aaaaaagcat ataccttcgt ttttgctttt ttggataaca tatattgtgc
721 ttttatgttt tgcgctttat ttgtttccta gattatttaa tcctagcaaa gaaatagatt
781 ataaatgggt tatagttttt tttacatttc ttttaggcat atatgcattt gcacgagcga
841 tctataaaat ggcaaatatt aaaagaattt atatcaciaa agaaaaactt gtgattgagt
901 attatatcaa aatgatttg gtttttcctt taggaacttt ttttatatat tatcgtcaaa
961 tttcatattc accttctcca ggacatatag tgatacatac ctttgagat aaggccaaag
1021 aataccttga acctggttta ttcagtgatg gcgatgatcc aacaaaaggt tgttgtgaaa
1081 aaattaatgc cattataaaa cctcatgtaa tgccttattt attaaagctta agtgatgaag
1141 aatttgaaaa aatctttttc catgtaaacg ctactagtga aattgatact actttcctta
1201 aagaagcaat ggaactcaga aaagagaaaa aagatgaatg aaaatattta tggaaagtta
1261 gagctttatt ctaaagaac tcaaagcact ctagtgata aaagggattt aggagtattt
1321 ggagatggtg ctccttatgc cttaggcatt acagaagggt ttgctactaa agcttttaag
1381 gggtaagcaa tgaataattc tactttacct tggaaaagca agagaaaatt ttacttcctt
1441 gctattttgc aatatattat ttatcttgca ttaggtcttt ttgtgtgttg gttttgttgg
1501 tttgttttgc ttaaagaatc tttgtggtat ggtttttttg cttttgggag tctttattat
1561 gtttttgaat tacatagggc attgaatttt aaatccataa ttttaacaga gcagggatta
1621 atattaaaaa tgcggtgggt tgatacagaa attttctatc cttatggaag ttttacaatg
1681 agttatgaca ttgcctatgg gataagattt tttgaaagaa tagaaataca aaatataaaa
1741 cacataagaa aagaatttat ttttccttgc ggtgtggatt cttttggtag ttttgaaaac
1801 aatcatacat ttaaagaatt atgcaccaa tatacaciaa aagctttaga gactatgaat
1861 ttagaagaaa aagtaaactt ttataagcct tatagggcaa atataaaaat attttttaat
1921 caagaaatag atcacaatgt ttttattatt gatttctccc cttatataca agagattaaa
1981 cttaatttaa aggataaaaa tgagtgaat aaacaataac acagaaatca aagagcaaga
2041 cacccaagat gaaatcattt gggaaggaaa aaaggatata ctttcgtttt tgctttattg

```

```

2101 gatagcaaat attgtatfff tatgtffffat tctttatfff tttcctagat tatttaatcc
2161 tagcaaagaa atagattata aatggffffat agttffffgtt atatfffctff ttgggffata
2221 tatacttgta aaaaatatct atcaaattggc aaatattaaa agaattffata tcacaaaaga
2281 aaaacttggt attgagtatt atattaaaaa tgattffggtt tttcctfftag gaactfffft
2341 tgtatattat cgtagttcgt cacttccatc catatcaaat ccaggagata tagtgatata
2401 cacctffgga gataaggfca aagaatacct tgaacctggt ttattcagtg atggcgatga
2461 tccaacaaaa ggttgfffft aaagaattaa tgccattata aaacctcatg taatgcctta
2521 tttattaagc ttaagtgatg aagaattfga aaaaatcatt tcacatgtaa gcggtffata
2581 cgaaattggt accactffcc ttaaagaagc aatggaactc agaaaagaga

```

//

LOCUS PIMPEBOA\_6 2407 bp DNA linear 12-APR-2021

DEFINITION Campylobacter species strain strain.

ACCESSION

VERSION

KEYWORDS .

SOURCE Campylobacter species

ORGANISM Campylobacter species

Unclassified.

COMMENT Annotated using prokka 1.14.6 from  
<https://github.com/tseemann/prokka>.

FEATURES

```

Location/Qualifiers
source 1..2407
        /organism="Campylobacter species"
        /mol_type="genomic DNA"
        /strain="strain"
gene 40..510
        /locus_tag="PIMPEBOA_00043"
CDS 40..510
        /locus_tag="PIMPEBOA_00043"
        /inference="ab initio prediction:Prodigal:002006"
        /codon_start=1
        /transl_table=11
        /product="hypothetical protein"
        /protein_id="Prokka:PIMPEBOA_00043"
        /translation="MPAFTSQSV*KSKVEFSDSKEYCSSIFVCMELDFKDVLSCIWAD
        KF*WTLRKNSFSIVWVKDFSINLNFSPFTFLISSLWIIIV*FAPISISLFSPTNS*EF
        LATLTLSTPTFKVLLNPTMVSLDKPTLIKYSAPTLTFLAKSMV*V*TFLILSL"

```

ORIGIN

```

1 gtaacaattt gagtatcacc tacttgatgg aggatttgat tgcctgcttt tacttcacaa
61 tctgffffgaa agtcaaaagt agaattffct gattctaaag aatattgctc ttctatctff
121 gttfgcatgg aattagactt taaagatgtg ttatcttgta tatgggcgga taaatffffga
181 tggacattaa ggaaaaattc tffffctatt gttffggftha aagatffffc tattaataat
241 ttatffffctc cttcacatt cttatctca tctffatgga taatagtatt ttgattfgca
301 cctatffcta tatctffgtt ttctctaca aactcatgag agttfftagc cactcttact
361 ttattatcta ctctacatt taaagtattg cttaatccta ctatggtatc tffagataaa
421 cctacattga ttaaatattc agcccctaca ttgacatfff tagccaaatc tatggffffga
481 gtatgaacct tfftaatcct ttcattataa attccatcta ctatagaatc tffatcattt
541 aaaatffctff gagtgaatf atgttgcact aatfcattcat aatcctffff ggctfftaaa
601 taaatffgtt cttgtctff tatatffgag agggtaagtt cattataacc tctffcattt
661 gtgcctatgg tfftagaaga aagagaagtt tgatgatcat taaaaggaag atffactaag
721 cttggattag cccattata caaactagag ctacatagg gttatctat atcatcatc
781 aaaaaagaaa caatcactc atctcccact cttggagtat gaaaaagcc tgaatgattg
841 cttgctatac ttgttgctac tcttaaaaaa ggagtatgat gataagatff ataagcattg
901 cttgataaat gattagaaga gttfgtgaag tffgtattat ctttagaatc agtattgfff

```

```

961 gtattttcat gagtattggt ttttatgttt gcacttaaaa gattattatc taattcctct
1021 tgattagcat aaagattaat ccttacctta acccttccat actcatcagt ataaatagta
1081 tttctctcac tttctataat cttactctct cctataacaa taccttgagt attatgaggg
1141 gctttaggct tagctttaaa acttggagta aagataatat tcttttttaa taaagttaaa
1201 gtattagaat aagacttact taaatttaaa tcttttaaat ttaaattgatc attagtattg
1261 atagaattag ctagtaaagc atcatctatt aagatttgag tattggcaat aataataaag
1321 tctttaagca aagaagcttt atcttgtttt tcttcatctt gacttttagt atcttcatca
1381 tcaactcaat cactcaaatt aaattcctta taatttaaaag tgataaaatc tcccaaacta
1441 agatgataaa tattactttt tgctagcaag ctttcattta agatcaaagc tcttttttct
1501 ttaagagaag gcttagtctt taaatcaata cttcttgtaa aagaatattc actctcataa
1561 aaatgttcat tataataagc tttgttatta agttcttgct cataaggaac tttactagaa
1621 tgtaaagata aaagatttaa aggagtatta gcattgatac tagaatgtgt aaaagcatta
1681 gttcttaagc tttgctcttt atagatagaa gaaatacaag cttgatttaa aatattattc
1741 acattaggat tgtactcaat ttctttattt tttacatttt tatacacatc acaaaaaataa
1801 atagtgtttt catcttcata aaaaaagatt ccattattgt gagctaactt tgtgataaat
1861 tctaaatcgc tttcattgta ttgagagatg agttcttggt cttcataatt aaaatgtata
1921 tgagaataat caatttcttt atgtaagata tcttgataaa aaccaagggt ttgtttaatc
1981 acttctatga tatgagtatg agtataaata cgattggctt tatttaaaga agtcttatc
2041 aagactgatt gaagcttaaa agaaaaaaaa tgcttgattt ttatttgctt agtgtttgaa
2101 gtgctatcat tgatatttaa agcactctca tgattgatac ctagatattt tatataagtg
2161 atgattcctt tatagttttt tacttcatta tgatcaaagt ttaaggattt gttctcataa
2221 ggattatgga tacttaaaat agcttcttga tcgattaaaa cattaggatg aaaattaaaa
2281 gttgtagggg tgcttagatg agatgaagca ttggttaaag tatttaaaga aaataaatct
2341 tgttctaaac tttcaaaaaa gccttcacat tctatagaaa aaagctcttc aagactttct
2401 ttgatga

```

//

LOCUS PIMPEBOA\_7 2139 bp DNA linear 12-APR-2021

DEFINITION Campylobacter species strain strain.

ACCESSION

VERSION

KEYWORDS .

SOURCE Campylobacter species

ORGANISM Campylobacter species

Unclassified.

COMMENT Annotated using prokka 1.14.6 from  
<https://github.com/tseemann/prokka>.

FEATURES Location/Qualifiers

source 1..2139

/organism="Campylobacter species"

/mol\_type="genomic DNA"

/strain="strain"

gene complement(23..667)

/locus\_tag="PIMPEBOA\_00044"

CDS complement(23..667)

/locus\_tag="PIMPEBOA\_00044"

/inference="ab initio prediction:Prodigal:002006"

/inference="similar to AA sequence:RefSeq:CKG87616.1"

/note="Domain of uncharacterised function (DUF1910)"

/codon\_start=1

/transl\_table=11

/product="hypothetical protein"

/protein\_id="Prokka:PIMPEBOA\_00044"

/translation="MVRDTSKDEAYFTKHIIECEEKIKKSEKILLELFPKGRETCLFC  
ITDRKKCIAMDKYSRGDDINPVKKDLEAYVLLKQKNRLEFAIDIGYYRGNALCLIRV

```

LLDMDSACVLELIEEDERKRRDILNRDWF LHFMSGKGNLNLERKCNCKEHELKEFV
ATKDIEFLHQYMKKHTRLRDPDLDTWLEGA AIVKLMNLDKEEFKQYKYPYDLI"
gene      complement(826..1515)
          /locus_tag="PIMPEBOA_00045"
CDS       complement(826..1515)
          /locus_tag="PIMPEBOA_00045"
          /inference="ab initio prediction:Prodigal:002006"
          /codon_start=1
          /transl_table=11
          /product="hypothetical protein"
          /protein_id="Prokka:PIMPEBOA_00045"
          /translation="MIQQENLDDIVLKFKCKLDFSAQYGLKTEEFITYGVFDDLLFT
FEHYLEEEDDCISFSVSRVKSMKSDEILCKIIGLDQPNLDFKILNQHGVRSPFSFK
SMEFTNLNDLKQSGLDMPDSYHSFLKAYKESIDTLIEAFKTDTTNTIKGLYDFIYN
YEENEDTIWQDRITLMQVLLLIELNQKEQALKILKNNQKAIEERDFTIEYDDGSIEVFD
VLKHSIENDLC"
gene      complement(1516..2133)
          /locus_tag="PIMPEBOA_00046"
CDS       complement(1516..2133)
          /locus_tag="PIMPEBOA_00046"
          /inference="ab initio prediction:Prodigal:002006"
          /codon_start=1
          /transl_table=11
          /product="hypothetical protein"
          /protein_id="Prokka:PIMPEBOA_00046"
          /translation="MSIKGYPIFAIPKKNKIQFALAKIQASPLAKIEYDRIRWEGIGG
KRSKKNHCKILFSSTQFNDKDKKRKQLKENQINGKRFEQKDFKIFKKECPNAQSQVT
LRVYDKNKPIVTRVDAIAHCKGKIIIREAKSSKDAPLTQNQIKAFNLISQKNNDITI
ELRGNKVLKYDNKMLKKGDKILSKNVTIKISRPSGITTYKSTKGI"

```

ORIGIN

```

1  tgggttttta aaccactaa gattaaatta aatcataagg aaagtatttg tattgtttaa
61  attcttcttt atctaaattc attagtttta caattgctgc accttcaaga tccaagtat
121 ctagaggatc tcttaatctt gtatgttttt tcatatattg atgtaaaaac tcaatattct
181 tagtagctac aaattcttta ataagctcgt gttctttaca attacatttg cgttctaaat
241 ttaaattctt acccttagaa cccataaaat gtaaaaacca atctctattg agaatatctc
301 ttctttttct ctcatcttct tctattaatt ctaatacaca agcactatcc atatctaata
361 atactctaata acaaagttca agagcatttc ctctataata accaatatca attgcaaatt
421 ctaaagcatt tttttgtttt aataatacgt atgcttctaa atctttttta actggattta
481 tatcatcgcc acgagagtat ttatccatag caatacattt ttttctatct gttatacaaa
541 aaagacaagt ttctcttttt ccaaaaggaa gctctaaaag tattttttcg gattttttta
601 ttttttcttc acactctatt atatgtttcg taaaatacgc ttcattctta ctagtatccc
661 ttaccatttt ctatcctttt tattatggta tttgtttgat aaaacctaata aagtttatat
721 aatttatgat tataatattt tatatattaa tcaatcttca cataactaaa cttcactaaa
781 actaaaacct aataaattgt tttctcttac acatttttaa aaatcctaac aaagatcatt
841 ttctatagaa tgtttttaaaa catcaaatac ttctatactt ccatcatcat attctatagt
901 aaagtctctt tcttcaatgg ctttttgatt attttttaga atttttaatg cttgttcttt
961 ttgattaagt tctataagta gtaaaacttg cattaagggt ctatcttgcc aaatagtatc
1021 ttcatcttct tcataattgt aaataaaatc ataaagccct tttattgtgt tagtagtatc
1081 agtttttaaaa gcttcaataa gagtatctat actttcttta taagctttta aaaaactatg
1141 ataagaatca cttggcatat catctaatac agattgtttt aaatcattca aattggtaaa
1201 ttccatactt ttaaaaagaaa atggaaaaga tctaacgcca tgttgattta aaattttaaa
1261 atctaaatta ggctgatcaa gtcctattat cttacataaa atttcatcac ttttcataga
1321 ttttactcta aaagaaacac taaaacttat gcaatcatct tcttcttcta aataatgttc
1381 aaaagtaaaa agtaagtcgt caaaaacacc ataagtgata aattcttctg tttttaaacc

```

```

1441 atattgtgct gaaaatttgt ccagtttttt gcaaaatttt agaacaatat catctaagtt
1501 ttcttgttgt atcatttaaa ttccttttgt tgatttgtat gttgttattc cgctagggcg
1561 tgatattttt attgtaacat tttttgataa tattttatct ccttttttta gcattttatt
1621 gtcataattc aaaactttat tacctcgtag ttctattggt atgtcattgt ttttttgact
1681 tattaaatta aatgctttta tttgattttg tgttagggga gcatctttag atgattttgc
1741 ctccctgata ataattttac ctttacaatg agctattgca tccactctgg ttgtaacaat
1801 gggtttattt ttatcataaa ctctgagagt tacttgggat tgtgcattag ggcattcttt
1861 tttaaatc ttaaaatcct tttgctcaa tcgtttgccg ttaatttgat tttccttaag
1921 ttgtttgcgt tttttatctt tatcattaa ttgagtgcta gaaaaaagta ttttacatga
1981 atgatttttc ttacttcttt tacctcctat cccttcccat cttatcctat catactcaat
2041 cttagcaaga ggactagctt gtatttttagc taaagcaaat tgaatcttat tcttttttagg
2101 tatagcaaat ataggatagc cttttatact cactcctat

```

//

LOCUS PIMPEBOA\_8 1875 bp DNA linear 12-APR-2021

DEFINITION Campylobacter species strain strain.

ACCESSION

VERSION

KEYWORDS .

SOURCE Campylobacter species

ORGANISM Campylobacter species

Unclassified.

COMMENT Annotated using prokka 1.14.6 from  
<https://github.com/tseemann/prokka>.

FEATURES

Location/Qualifiers

source

1..1875

/organism="Campylobacter species"

/mol\_type="genomic DNA"

/strain="strain"

gene

7..630

/locus\_tag="PIMPEBOA\_00047"

CDS

7..630

/locus\_tag="PIMPEBOA\_00047"

/inference="ab initio prediction:Prodigal:002006"

/codon\_start=1

/transl\_table=11

/product="hypothetical protein"

/protein\_id="Prokka:PIMPEBOA\_00047"

/translation="MSIKGYPIFAIPKKNKIQFALAKIQASPLAKIEYDRIRWEEIGG

KLKAAQRRRREKSKEKAKMLLYLENENKDKVSDQEVHLYKHNGIWPKITPKPRSSDY

ILEDGEIILNIKQRAMEIKNTLNGGYNISIKTKDKLTRYDLGKPHYEKTSKKIIDT

PHKIEYTKHINPQDTTKYRMSQGAVEPISHKDLDIVENYLKRQNNEI"

gene

620..1006

/locus\_tag="PIMPEBOA\_00048"

CDS

620..1006

/locus\_tag="PIMPEBOA\_00048"

/inference="ab initio prediction:Prodigal:002006"

/codon\_start=1

/transl\_table=11

/product="hypothetical protein"

/protein\_id="Prokka:PIMPEBOA\_00048"

/translation="MKFENLKHGSLFKREFYLDVKIDLRNDFVYSITMNKNTLEIF

FKSEKKDIQDLQIIFYDYKLLHPKSYCKNFNQLLEANFIDLIRNNWDDITGYIEKEEEM

LISIFYDNDLEYITLTCKYFNIDFID"

gene

1021..1578



```

CDS
    /locus_tag="PIMPEBOA_00049"
    1021..1578
    /locus_tag="PIMPEBOA_00049"
    /inference="ab initio prediction:Prodigal:002006"
    /inference="similar to AA sequence:RefSeq:CKG87579.1"
    /codon_start=1
    /transl_table=11
    /product="hypothetical protein"
    /protein_id="Prokka:PIMPEBOA_00049"
    /translation="MTREQAELIIKEEKLIDTDWYPSYKHSGEFHLTMMWFSDNNKYE
TFYVGERGSVELEYSFDSEKEAIDKMLQMNYEQKKYDGKDIKEYLTKEVALRIIKEEN
LEVIWYDEALKPMRAGIKHDKQRDKYISFITNAKAEIIIEYRSIEFDGDRYSETFKEML
NDENIALYALINRARMIKQNRISFT"

```

ORIGIN

```

1 ataggagtga gtataaaagg ctatcctata tttgctatac ctaaaaagaa taagattcaa
61 tttgcttttag ctaaaataca agctagtcct cttgctaaga ttgagtatga taggataaga
121 tgggaagaga taggaggtaa attaaaagct gcacaaagaa ggagaagaga aaaaagtaaa
181 gagaaagcaa aaatgctttt atatttggaa aatgaaaata aaaaagataa agtaagtgat
241 caagaagttc atctttataa acataatgga atatggccta aaattactcc aaaacctaga
301 agttctgatt atattcttga agatggagag attattttta acatcaaca aagagccatg
361 gaaataaaaa atacctttaa tggagggtat aatagtattt ctataaagac aaaagataaa
421 cttaccagat atgattttaga tggtaaacca cattatgaga agacatcaa gaaaataatt
481 gatacacctc ataaaataga atatactaaa catataaatc ctcaagatac aacaaagtat
541 agaatgtcac agggagcagt agagccaata tctcataaag atttagatat tgtagaaaat
601 tatttaaaaa ggcaaaataa tgaatttga gaattttaaag catggaagtt tattcaaaag
661 agaattttat cttaaagatg taaaaataga ttttaagaaat gacttttatg tttattctat
721 cacaatgaat aaaaacactt tggaaatatt ttttaaatca gagaaaaaag atatacaaga
781 tttgcaaatt attttttatg attataagtt gctacatcca aaatcatatt gtaaaaattt
841 taatcaatta gaagctaatt ttatagattt gataagaaat aattgggatg atataacagg
901 ctatattgaa aaagaagaag agatgttgat aagcatatat tttgataatg atttagaata
961 tattacttta acttgtaagt attttaatat agattttata gactgaataa aggatagaaa
1021 atgacaagag aacaagcaga attaatcata aaagaagaaa agttgattga tacagattgg
1081 tatccttctt ataaacattc aggagaattt catcttacta tgtggtttga ttctgataat
1141 aataaatatg aaactttcta tgttggagaa aggggcagtg ttgaacttga gtattctttt
1201 gatagtgaag aagaagccat tgataaaatg ttgcagatga attatgaaca aaaaaaatac
1261 gatggaaaag acattaaaga atatctaaca aaagaagtag cactaagaat catcaaagaa
1321 gaaaatctag aagtgatttg gtatgatgaa gcacttaaac caatgcgagc aggtatcaaa
1381 cacgataaac aaagagataa atatatttct tttatcacta atgctaaagc agagattata
1441 gaatacagaa gtattgagtt tgatggggat agatacagtg aaacttttaa ggaaatgctt
1501 aacgatgaaa atatagccct ttatgctctt atcaatcgtg ccagaatgat taagcaaaat
1561 aggattagct ttacgtaaat actttcctta taatttaatt taatcttagt gggtttaaaa
1621 acccacaagg cttttcatgg ctagaatttg ctatacccaa aaagaataag attaaatttg
1681 ctttagctaa aatacaagct agtcctcttg ctaagattga gtatgatagg ataagatggg
1741 aagggatagg aggtaaaaga agtaagaaaa ataaaaatga tagagcaaag caaatacaag
1801 cattaaaaaa taatcagcaa aacaacaac aaaattcatt tttacaagaa gttgaacaac
1861 aaaaagaaga ggctg

```

//

```

LOCUS      PIMPEBOA_9          1821 bp    DNA        linear      12-APR-2021
DEFINITION Campylobacter species strain strain.
ACCESSION
VERSION
KEYWORDS
SOURCE     Campylobacter species
ORGANISM   Campylobacter species

```

```

Unclassified.
COMMENT    Annotated using prokka 1.14.6 from
           https://github.com/tseemann/prokka.
FEATURES   Location/Qualifiers
    source   1..1821
            /organism="Campylobacter species"
            /mol_type="genomic DNA"
            /strain="strain"
    gene     67..321
            /locus_tag="PIMPEBOA_00050"
    CDS      67..321
            /locus_tag="PIMPEBOA_00050"
            /inference="ab initio prediction:Prodigal:002006"
            /inference="similar to AA sequence:RefSeq:CKG86821.1"
            /codon_start=1
            /transl_table=11
            /product="hypothetical protein"
            /protein_id="Prokka:PIMPEBOA_00050"
            /translation="MLDPLEIEKLSPEYRVRNYFKFLTATMFFLVITFIILPCLLQ
            AYLFKCYSTGEKRKLSWFIGFVCNAPILIASVYVYENL"
    gene     440..931
            /locus_tag="PIMPEBOA_00051"
    CDS      440..931
            /locus_tag="PIMPEBOA_00051"
            /inference="ab initio prediction:Prodigal:002006"
            /inference="similar to AA sequence:RefSeq:CKG86719.1"
            /codon_start=1
            /transl_table=11
            /product="hypothetical protein"
            /protein_id="Prokka:PIMPEBOA_00051"
            /translation="MGEDITLSIFWGLIGFILACSVIEFYLIASVLIVFSILNYWIK
            INIKEFVKSYFLISFIIFFMAIVIVFYLYDLETSRGLVLLGPPEIEKLSPEYKARN
            YFDLGGITFIFLVITFFILPCLLQAYLFKCYSTGEKRKLSWFIGFVCNPILMAGVY
            VMY"

ORIGIN
1   ttttttacag ctattattat catattttat cttagctatg atcttgaatt ttataaatcg
61   cttgtattgc ttgatcctct agaaattgaa aaattatcac cgcaagaata tagagtgcgt
121  aattatttta aatttttaac ctttgcaact atgttttttt tagtaatcac atttattata
181  cttccttggt tattgcaagc ttatttattt aaatgttata gcacaggaga aaaacgcaaa
241  aaattaagtt ggtttatagg gtttgtgtgt aatgctccta tattaattgc gagtgtgtat
301  gtggtatatg aaaatcttta aagactatca aaaattcact cttatgggtt tggattttaa
361  actttatagt aaagatttta tcactaagct tgatttttaa gataaagctt ataatgtgct
421  ttataataca ggagttttaa tgggagaaga tattacactt tctatttttt ggggtttgat
481  aggatttatt cttgcttgta gtggtataga attttatctt atagctctaa gcgttcttat
541  tgtcttttct attttaaatt attggatcaa gattaatata aaagaatttg taaaatctta
601  ttttttaata tcttttatta tcttttttat ggctattggt atcgtatttt atcttactta
661  tgatcttgaa acttctaggg gacttgtatt acttggtcct ccagaaattg aaaaattatc
721  accacaagaa tataaagcac gtaattattt tgatttttta ggcggtataa cttttatttt
781  tttagtaatc acatttttta tacttccttg tttattacaa gcttatttat ttaaatgcta
841  tagcacagga gaaaaacgca aaaaattaag ttggtttata gggtttgtgt gtaatcctat
901  attaatggcg ggtgtgtatg tgatgtatta aaatctttaa agacttttaa aaaatttaat
961  atatttgata taatatttat ttatctttaa tatttagaga aaaaatgaat agagaattat
1021 ttataacaag acttgcattt ataaacaatg atgaaataaa taaaataaat aaaaattcat
1081 ctattgcata tttaaaagcc ttatatcaat gtgaaaattc catagctgta aattatgatg

```

```

1141 aagaagagct tttcacccaa accactgcta taaacaatct aggatatggc aatgatttca
1201 caaaaatctt catcctagat aaagaaaacc tcaatgacac ctatcttgat gctagaaaaa
1261 agctttataa atctatcaat actttaaaag aagaaaaaaa tgaaaaaata aaaaatatcc
1321 aagcttatgt aaataaagaa aattccttgc aagacaatct aaataatcaa agctttaata
1381 ctgaggaaaa tgatgttaat ttaattttaa acgaagtatt taacatagag caattttatg
1441 ataaaaatac caataccata gtattaaaga caaataatat aaaaatcata ttcttagata
1501 aagtaaattt acaagatttg caagataatt ctaacaatac ttctttcatc tctatgtcaa
1561 atttaacca tatttatgag aatcattgtg atatttttac gaaagataga agtatttttag
1621 atataaaatt tatagaagaa aaatatcaaa tagattttaa aagtttagat acaaaaatct
1681 tcctaaactc caccctcctt acaggctcca ccgaactccc taataatcct ttttactttg
1741 gagaattaga tcaagataat actataaaac aagatatacc cagttattat ttttctccta
1801 aagatgaaag cagtggttta g

```

//

LOCUS PIMPEBOA\_10 1275 bp DNA linear 12-APR-2021

DEFINITION Campylobacter species strain strain.

ACCESSION

VERSION

KEYWORDS .

SOURCE Campylobacter species

ORGANISM Campylobacter species

Unclassified.

COMMENT Annotated using prokka 1.14.6 from  
<https://github.com/tseemann/prokka>.

FEATURES

Location/Qualifiers

source

1..1275

/organism="Campylobacter species"

/mol\_type="genomic DNA"

/strain="strain"

gene

112..609

/locus\_tag="PIMPEBOA\_00052"

CDS

112..609

/locus\_tag="PIMPEBOA\_00052"

/inference="ab initio prediction:Prodigal:002006"

/inference="similar to AA sequence:RefSeq:CKG86821.1"

/codon\_start=1

/transl\_table=11

/product="hypothetical protein"

/protein\_id="Prokka:PIMPEBOA\_00052"

/translation="MGDSITLSIFVGSLLSIAVITKFYLIASVLIVFSILNYWIKIN

IKEFVKSYFLVYFTIFFTAIVIIIFYLTYGIETSKDLALLSSLEAKELSPQEYRVRNYF

KFLTFATMFFLVITFIILPCLLQAYLFKCYSAGEKRKKSWSFIGFVCNIIILIASAYL

MYIFI"

gene

728..1231

/locus\_tag="PIMPEBOA\_00053"

CDS

728..1231

/locus\_tag="PIMPEBOA\_00053"

/inference="ab initio prediction:Prodigal:002006"

/inference="similar to AA sequence:RefSeq:CKG86821.1"

/codon\_start=1

/transl\_table=11

/product="hypothetical protein"

/protein\_id="Prokka:PIMPEBOA\_00053"

/translation="MGEDITFSIFWGLFGFILAFTNIKFYLTTLISVLIVFSILNYWIK

INIKEFVKSYFSIYFIIFFTAIIVIIIFYLTYGIETSKDLALLSSLEAKELSPQYKARN

YFGFLTCMTMFFLVITFIILPCLLQAYLFKRYSTEEKRKKLSWFIGFLCNIIILIASA  
YLMYIFI"

ORIGIN

```
1 caaaaattca ctccttatgg tttggatntt agactttata gtaaagattt tactactaaa
61 cttgatttta aagataaagc ttataatgtg ctttataata caggagttta aatgggagat
121 agtattacgc tttctatntt ttagagttca ttgctatcca ttgctgttat cacaaaattt
181 tatcttatag ctttatctgt tcttattgtc ttttctatntt taaattattg gattaagatt
241 aatataaaaag aatttgtaaa atcttattntt ttagtatatt ttactatctt ttttacagct
301 attgttatca tattttatct tacctatggg attgaaactt ctaaggatct tgcattgctt
361 agctctctag aagctaaaga attatcaccg caagaatata gagtgcgtaa ttattttaaa
421 tttttaacct ttgcaactat gtttttttta gtaatcacat ttattatact cccttgntta
481 ttgcaagctt atttatntaa atgnttatagc gcaggagaaa aacgcaaaaa attaatgntg
541 tttatagggg ttgtgtgcaa tattattata ttaattgcaa gtgcatatntt gatgtatata
601 tttatntaaa gactatcaaa aattcactcc ttatggnttg gattnttagac tttgtagtaa
661 agattnttatc actaagcttg atntntaaaga taaagcttat aatgtgctntt atgatacagg
721 agntntaaatg ggagaagata ttacattntt tattntnttg gntntnttg gattnttct
781 tgctntntact aatataaaa tttatcttac cactnttaagt gntctnttg tctntntctat
841 tntaaattat tggatntaaa ttaatataaa agaattntgta aatctntat tntcaatata
901 tnttattatc tntnttacag ctattgntat catatntntat cttacctatg gtattgaaac
961 ttctaaggat cttgcattgc ttagctctct agaagctaaa gaattatcac cacaaagata
1021 taaagcacgt aattatnttg gattnttgac ttgtatgact atgntntntt tagtaatcac
1081 atntattata cttccttgnt tattgcaagc ttatntatntt aaacgctata gcacagaaga
1141 aaaacgcaaa aaattaagnt ggntntatagg gntntntatgc aatattnta tntaatntgc
1201 aagtgcata ttgatgtata tntntntta aagactatca aaaattcact ccttatgntt
1261 tggatnttag actnt
```

//

LOCUS PIMPEBOA\_11 1237 bp DNA linear 12-APR-2021

DEFINITION Campylobacter species strain strain.

ACCESSION

VERSION

KEYWORDS .

SOURCE Campylobacter species

ORGANISM Campylobacter species

Unclassified.

COMMENT Annotated using prokka 1.14.6 from  
<https://github.com/tseemann/prokka>.

FEATURES Location/Qualifiers

source 1..1237

/organism="Campylobacter species"

/mol\_type="genomic DNA"

/strain="strain"

ORIGIN

```
1 ctccttacag gctccaccga actccctaata atcctntntt actnttgaga attagatcaa
61 gataatacta taaaacaaga tatacccgat tntatntntt ctcctaaaga tgaaagcagt
121 ggntntaggaa gacttagcat cttntntaaa aatgatgaac tntgcttgct taattnttct
181 atattagaca atntntntaa tatcaaatta gaatgcttaa gcaaaacaaag cttagaatac
241 aaagattntaa tntcaaacac tctaaaagaa caaaaaacca cacaaagtaga taaaaaacaa
301 agcatagcca aacttcacgc tctntntagaa aatcaaaacc tagaatgtat ccatggaggnt
361 aaagtcatac ttaaatcaaa caaaggaaaa tcctntntaaa gtgatgntat ccctataatg
421 ctagaaagtg atntntntaa ctctagntata gtagctntgtc ctcacacctat agcaaatgta
481 agntatcctt gtactaagnt agntgntatnt aaagntcctt tatctcaaaa gaaagntaat
541 aatgaatntg taatctntaca agaactcatc tcagctntgca ctacagataa agntntntgct
601 tntaaaagntaa gctntntctc aagntaagntt aaatntntgat acagctntntga tcttgaggag
661 ggctntaggag aacaaagntaa aatcaaaata gntntntaaag agcctntaat aagactntcat
```

```
721 tataaaagtg atagatttca aaaagataat ttgcctattht ataatcttht aatcaataat
781 gaaaaaaaag aacaagataa ggctthtaaat gaattcaata tagaacaaaa agattthaaaa
841 gatatagagg atataaatat cthttaatcaa thtaaacaaag actthtagtaa agatcatgaa
901 thtaagaat taaatcttag cthcgataact aattthaatca agctthtattt cattatcccc
961 aaaaacattg ctaaagthta taaaagtgcct tataaagaat thaaaaacaa agatctagga
1021 gcagggtatt ttacacagct acatgaatat gataaaatca thaaaaattc thtagaagat
1081 aagaaagaat taaacgaata tcattthact thththactc ctgcaaaaat gcaaaattta
1141 aaacttcaa tcgcacaagg attagataaa atctthagaag atgaagatag aaaacaagag
1201 cthtatgtht gtaaatttht ggtggtaaat ggggtta
```

//

LOCUS PIMPEBOA\_12 1123 bp DNA linear 12-APR-2021

DEFINITION Campylobacter species strain strain.

ACCESSION

VERSION

KEYWORDS .

SOURCE Campylobacter species

ORGANISM Campylobacter species

Unclassified.

COMMENT Annotated using prokka 1.14.6 from  
<https://github.com/tseemann/prokka>.

FEATURES

Location/Qualifiers

source

1..1123

/organism="Campylobacter species"

/mol\_type="genomic DNA"

/strain="strain"

gene

complement(113..265)

/locus\_tag="PIMPEBOA\_00054"

CDS

complement(113..265)

/locus\_tag="PIMPEBOA\_00054"

/inference="ab initio prediction:Prodigal:002006"

/codon\_start=1

/transl\_table=11

/product="hypothetical protein"

/protein\_id="Prokka:PIMPEBOA\_00054"

/translation="MNENIYGSLEFYKSTQSTPSDKRDLGVFGDVAPYALGITESFT  
TKAFKG"

gene

complement(258..890)

/locus\_tag="PIMPEBOA\_00055"

CDS

complement(258..890)

/locus\_tag="PIMPEBOA\_00055"

/inference="ab initio prediction:Prodigal:002006"

/codon\_start=1

/transl\_table=11

/product="hypothetical protein"

/protein\_id="Prokka:PIMPEBOA\_00055"

/translation="MSEINNTEIKEQDTQDEIIEWEGKKEIPSFLLYWITYIVLLCFM  
LYLLPRTFDNTKNFKWVFFIMFLLGIYIFAREIYKMANIKRIYVTKELVVEYYIKN  
DLVFPLGTFVYRSLPFG LTPGDMVIYTFGDKVKEYLEPGLFSAGDDPTKGCCEKIN  
AIIKPHVMPYLLSLSDEEFKIISHVSGFSEIDTTF LKEAMELRKEKDE "

ORIGIN

```
1 aacaaaacca acacagaaaa aaagctaata taaaataaag agagcaaaaa aacaaactaa
61 aaggaataat thttctctta cthttccaaa gtaaagtaga attattcatt gcttaccctt
121 taaaagcctt agtagtaaaa cthttctgtaa tgcctaaagc ataaggagca acatctccaa
181 atactcctaa atctctthta tcactaggag tgctthtagt thctthtagaa taaaactcta
```

```

241 aacttcata aatattttca ttcattttt ttctcttttc tgagttccat tgcttcttta
301 aggaaagtag tatcaatttc gctaaaaccg cttacatgtg aaatgatttt ttcaaattct
361 tcatcactta agcttaataa ataaggcatt acatgagggt ttataatggc attaattttt
421 tcacaacaac cttttgttgg atcatcgcca gcaactgaata aaccagggtc aaggatttct
481 ttgaccttat ctccaaaggt gtatatcacc atatctcctg gagtaagccc aaatggcaaa
541 ctacgataat atacaaaaaa agttcctaaa ggaaaaacca aatcattttt aatataatac
601 tcaaccacaa gtttttcttt tgtgacataa attcttttaa tatttgccat tttatagatc
661 tctcgtgcaa atatatatat gcctaaaaga aacataataa aaaacacaaa ccatttataa
721 ttcttagtat tgtcaaagt cctaggaagc aaataaagca taaaacataa aagcacaata
781 tatgttatcc aataaagcaa aaacgaaggt atttcctttt ttccttccca aatgatttca
841 tcttgagtgt cttgttcttt gatttctgtg ttattgttta tttcactcat ttttatcctt
901 tactctgctt ttacttctcc acctttaacc acaagtccat tagagtctat aatcacttct
961 actccacctg ctttaatgat aacacaatct ttcttggtaa caatttgagt atcacctact
1021 tgatggagga tttgattgcc tgcttttact tcacaatctg tttgaaagtc aaaagtagaa
1081 ttttctgatt ctaaagaata ttgctcttct atctttgttt gca

```

//

LOCUS PIMPEBOA\_13 1121 bp DNA linear 12-APR-2021

DEFINITION Campylobacter species strain strain.

ACCESSION

VERSION

KEYWORDS .

SOURCE Campylobacter species

ORGANISM Campylobacter species

Unclassified.

COMMENT Annotated using prokka 1.14.6 from  
<https://github.com/tseemann/prokka>.

FEATURES

Location/Qualifiers

source

1..1121

/organism="Campylobacter species"

/mol\_type="genomic DNA"

/strain="strain"

gene

161..541

/locus\_tag="PIMPEBOA\_00056"

CDS

161..541

/locus\_tag="PIMPEBOA\_00056"

/inference="ab initio prediction:Prodigal:002006"

/inference="similar to AA sequence:RefSeq:CKG87598.1"

/codon\_start=1

/transl\_table=11

/product="methyltransferase small"

/protein\_id="Prokka:PIMPEBOA\_00056"

/translation="MQMDKYYKAKGYKRISLNKVKGLDDKIHHEMDGIYYNPDKNPKY  
IIAEAKFGTSKLDKTKQMSDEWLIKLNKQKQKLDNVGEKQAKEIKLLNSNEVRKDLF  
HVDEGGKETIDYLDKDKANKIKPKG"

ORIGIN

```

1 cctctagata cttgggatct tgaaggtgca gcaattgtaa aactaatgaa tttagataaa
61 gaagaattta aacaatacaa atacttttct tatgatttaa tttaatctta gtgggtttta
121 aaacccaaaa aataatcagc aaaaaggtaa ttatgctgaa atgcaaatgg ataaatatta
181 caaagctaaa ggctataaaa gaattagttt aaataaagtc aaagggtctg atgataaaat
241 tcatcatgaa atggatggaa tttattataa tccagataaa aacccaaaat atatcatcgc
301 agaagctaag tttggaacaa gcaattaga tagaaaaact aagcaaatga gtgatgaatg
361 gttaataaag aataaactaa aacagcttaa agataatgta ggagaaaaac aggccaaaga
421 aataaaaaaa cttcttaata gcaatgaagt cagaaaagat ttatttcatg ttgatgaagg
481 aggtaaagaa actattgatt atttagataa agatgcaaat aaaataaaac ccaaagata

```

```

541 gaaaatggta agggatacta gtaaagatga agcgtatfff actaaagaga taatagaaag
601 tgaagaagat atcaaagaat ccgaaaaaat acttttagag cttccttttg gacaaagaga
661 aacttgtctt ttttgtatag aagatagaaa atttcatctt gctatggata aatactctcg
721 tggtagatgat atagacatag ttaaaaaaga tttagaagca tacatactag aaaaagaaaa
781 aaatcgttta gaaaaaggat tggatattag ctggtttgat ggaaatgctc ttgaactttg
841 tgtagagta ttactagata tggatagtgc ttgtgtatta gaattaatag aagaagatga
901 gagaaaaaga agagatattc tcaatagaga ttggttttta cattttatag gatctaaggg
961 taagaattta aatttagaac gcaaagtgtat tcgcaaagaa cacgagctta ttaaagaatt
1021 tgtagctact aaggatattg agtttttaca tcaatatatg aaaaaacata caagattaag
1081 agatcctcta gatacttggg atcttgaagg tgcagcaatt g

```

//

LOCUS PIMPEBOA\_14 1024 bp DNA linear 12-APR-2021

DEFINITION Campylobacter species strain strain.

ACCESSION

VERSION

KEYWORDS .

SOURCE Campylobacter species

ORGANISM Campylobacter species

Unclassified.

COMMENT Annotated using prokka 1.14.6 from  
<https://github.com/tseemann/prokka>.

FEATURES Location/Qualifiers

source 1..1024

/organism="Campylobacter species"

/mol\_type="genomic DNA"

/strain="strain"

gene complement(475..972)

/gene="trxB\_2"

/locus\_tag="PIMPEBOA\_00057"

CDS complement(475..972)

/gene="trxB\_2"

/locus\_tag="PIMPEBOA\_00057"

/inference="ab initio prediction:Prodigal:002006"

/inference="similar to AA sequence:RefSeq:CKG86288.1"

/codon\_start=1

/transl\_table=11

/product="thioredoxin reductase"

/protein\_id="Prokka:PIMPEBOA\_00057"

/translation="MLPFIDEIMGVDWVIDLNKYDIASDESCKIYKALRSDVVEGKIK

DPRDIDSTYESRREFDRHRGGYKNGMREGYETDTPNDWSEEEAQLFNDTLILHAKLAA

LTPPQGYPNAPYYFTPENLEWYYKRHKLDKLLDPRIPIAIYRYNFPRELRAKILKFGE

NGIKE"

ORIGIN

```

1 ttcttatacc acttcttata actaaatatt tatatctttc ttttttagtt ttttagtgagt
61 tataataagc tttttctgct ttagtccaag gagctatgct tcctttaatg ggatctttta
121 aatatatgct ttgccaatct ttaaattcaa gcaaagtgga tttttgccct gtgtgaaatt
181 caggatctag atacctaggt tgatagtctt tgtagggaga gttttgtttg atattgtgtg
241 cttcaaaaag agctctagaa tattcttggg tgtatttggc tacttcacgc ccatcttttc
301 ttttatcaaa tataatttga tttgtatfff tatcaacttc taatataagt ccattagaag
361 tatagatctc gtaaatatct ttattatcac tcatttttat cttttcttaa tttatcccat
421 atataaacca tcttccatga ttatagtagt ggctaactctg cctatgtaat tactttattc
481 ttttaatacca ttttcttcgc caaatttgag tatcttagct ctaagttccc ttgggaaatt
541 atatctataa atagcagga ttcttggatc aaggagtta tcaagcttat gtcttttata
601 ataccattct agattttcag gggtaaaata ataaggtgca ttaggatagc cttgaggagg

```

```
661 agtgaggct gctagtttg catgaagtat taaagtatca ttaaaaagtt gtgcttcttc
721 ttcgctccaa tcattgggtg tatcggtttc atagccttcc ctcatgccat ttttataccc
781 acctctatgg cgatcaaatt cccttctgct ttcataagta gaatctatat ctcttggatc
841 ttttatcttg ccctcaacta catcacttct taaggcttgg tatatTTTTT cagattcatc
901 actagctata tcatatTTTt ttaaTcaat cacccaatct actcccataa tctcatctat
961 aaaaggaagc ataccaaatt catcaggTTT taaagtctta gctaaggTTT taatttGTTg
1021 ttct
```

//

LOCUS PIMPEBOA\_15 909 bp DNA linear 12-APR-2021

DEFINITION Campylobacter species strain strain.

ACCESSION

VERSION

KEYWORDS .

SOURCE Campylobacter species

ORGANISM Campylobacter species

Unclassified.

COMMENT Annotated using prokka 1.14.6 from  
<https://github.com/tseemann/prokka>.

FEATURES

Location/Qualifiers

source

1..909

/organism="Campylobacter species"

/mol\_type="genomic DNA"

/strain="strain"

gene

29..160

/locus\_tag="PIMPEBOA\_00058"

CDS

29..160

/locus\_tag="PIMPEBOA\_00058"

/inference="ab initio prediction:Prodigal:002006"

/inference="similar to AA sequence:RefSeq:CKG87616.1"

/note="Domain of uncharacterised function (DUF1910)"

/codon\_start=1

/transl\_table=11

/product="hypothetical protein"

/protein\_id="Prokka:PIMPEBOA\_00058"

/translation="MKKHTRLRDLPLDWDLEGAIVKLMNLDKEEFKSYKYFPYDLI"

ORIGIN

```
1 taaggatatt gagtttttac atcaatatat gaaaaaacat acaagattaa gagatcctct
61 agatacttgg gatcttgaag gtgcagcaat tgtaaaacta atgaatttag ataaagaaga
121 atttaaaagc tataaatatt ttccttatga ttttaattta tcttatttgg ataacagaaa
181 agagtagaga tagacttggc attgtagata aaaaacatag ggaaaaaata gaagaacttc
241 ttgaaaaaaa tagcaatgaa gtcagaaaag atttatttca tgttgatgaa ggaggtaaag
301 aactattga ttatttagat aaagatgcaa ataaaataaa acccaaagga taaaaaatgc
361 taagagatac taagagagat gaagcgtatt ttacgaaaca tataatagag tgtgaagaag
421 aaattaaaga agatgaaaaa atacttttag agcttccttt tggaaaaaga gaaacttgtc
481 ttttttgat aacagataga aaaaaatgta ttgctatgga taaatactct cgtggtgatg
541 atataaatct agttaaaaaa gattttagaag cacttatgct attaagacaa aaaaatcggt
601 tagaattagg tggatttgat actagcgatt atagaggaaa tgctattgaa ctttgtgta
661 gagtattatt agatatggat agtgcttgtg tattagaatt aatagaagaa gatgagagaa
721 agaaaaaaga tatttttaat agagattggT ttttacattt tatgggttct aagggtaaaa
781 acttaaattt agaacgcaa tgtaattgta aagaacacga gcttattaaa gaatttGTTg
841 ctactaagga tattgagttt ttacatcaat atatgaaaaa acatacaaga ttaagagatc
901 ctctagata
```

//

LOCUS PIMPEBOA\_16 895 bp DNA linear 12-APR-2021



DEFINITION Campylobacter species strain strain.  
 ACCESSION  
 VERSION  
 KEYWORDS .  
 SOURCE Campylobacter species  
 ORGANISM Campylobacter species  
 Unclassified.  
 COMMENT Annotated using prokka 1.14.6 from  
<https://github.com/tseemann/prokka>.  
 FEATURES Location/Qualifiers  
   source 1..895  
           /organism="Campylobacter species"  
           /mol\_type="genomic DNA"  
           /strain="strain"  
   gene complement(320..889)  
           /gene="trxB\_3"  
           /locus\_tag="PIMPEBOA\_00059"  
   CDS complement(320..889)  
           /gene="trxB\_3"  
           /locus\_tag="PIMPEBOA\_00059"  
           /inference="ab initio prediction:Prodigal:002006"  
           /inference="similar to AA sequence:RefSeq:CKG86288.1"  
           /codon\_start=1  
           /transl\_table=11  
           /product="thioredoxin reductase"  
           /protein\_id="Prokka:PIMPEBOA\_00059"  
           /translation="MHKNPLREQQIKTLAKTLKPDEFGLPFIDEIMGVDWVIDLNKY  
 DIASDQFGSMYKALRSDVVEGKIKDPRDIDSTYESRREFDRHRGGYKNGMLQGYGTD  
 PNDWSEERAQLFNDTLILHAKLAALTPPQGYPNAPYYFTPENLEWYYKRHKLDKLLDP  
 RIPAIYRYNFPRELRAKILKFGEENGIKE"

ORIGIN

```

1 tggatTTTTG ccctgtgtga aattcaggat ctagatacct aggttgataa ttaatataag
61 gagaggTtct taaaattcta tcggcttcaa acaaagcttt agaatattct tgggtgtatt
121 tgcctacttc acgcccattc tctcttttat caaatataat ttgatttgta tttttatcaa
181 cttctaatat aagtccatta gaagtataga tctcgtaaat atctttatta tcactcatct
241 tttatccttt cttaatttat cccatatata aaccatcttc catgattata gtagtggcta
301 atctgcctag gtaattactt tattctttta tgccattttc ttcgccaaat ttgagtatct
361 tagctctaag ttcccttggg aaattatata tataaatggc agggattctt ggatcaagga
421 gtttatcaag cttatgtcct ttataatacc attctagggt ttcaggggta aaataataag
481 gtgcattagg atagccttga ggaggagtga gggctgcgag tttggcatga agtattaaag
541 tatcattaa aagttgtgcc ctttcttcac tccaatcatt aggtgtatcg gttccatagc
601 cttgcagcat gccattttta tatccacctc tatggcgatc aaattccctt ctgctttcat
661 aagtagaatc tatatccctt ggatctttta tcttaccctc aaccacatca cttcttaagg
721 cttatacat acttccaaat tgatcactag ctatatcata tttattttaa tcaatcacc
781 aatctactcc cataatctca tctataaaag gaagcatacc aaattcatca ggttttaaag
841 tcttagctaa ggttttaatt tgttgttctc ttaaaggatt tttatgcact cctac

```

//

LOCUS PIMPEBOA\_17 877 bp DNA linear 12-APR-2021  
 DEFINITION Campylobacter species strain strain.  
 ACCESSION  
 VERSION  
 KEYWORDS .  
 SOURCE Campylobacter species  
 ORGANISM Campylobacter species

Unclassified.

COMMENT Annotated using prokka 1.14.6 from  
<https://github.com/tseemann/prokka>.

FEATURES Location/Qualifiers

source 1..877  
/organism="Campylobacter species"  
/mol\_type="genomic DNA"  
/strain="strain"

gene 2..571  
/gene="trxB\_4"  
/locus\_tag="PIMPEBOA\_00060"

CDS 2..571  
/gene="trxB\_4"  
/locus\_tag="PIMPEBOA\_00060"  
/inference="ab initio prediction:Prodigal:002006"  
/inference="similar to AA sequence:RefSeq:CKG86288.1"  
/codon\_start=1  
/transl\_table=11  
/product="thioredoxin reductase"  
/protein\_id="Prokka:PIMPEBOA\_00060"  
/translation="MHKNPLREQQIKTLAKTLKPDEFGLPFIDEIMGVDWVIDLNVY  
QNFDAWGKIYRALRSDVVEGKIKDPRDVDSTYESRREFDRYMDGYQNGMTINYHVDI  
NNYRSEESAKLFMDSLVLLEAKLAALTPPQGYPNAPYYFTPERLEWDYKKNYQLDKLLDP  
RIPAIYRYNFPRELRAKILKFGEENGIKE"

ORIGIN

```

1 agtgcataaa aatcctttaa gagaacaaca aattaaacc ttagctaaga ctttaaaacc
61 tgatgaattt ggtatgcttc cttttataga tgagattatg ggagtagatt ggggtgattga
121 tttaaatggt tatcaattta attttgatgc atggggaaaa atatatagag ccttaagaag
181 tgatgtagtt gagggcaaga taaaagatcc aagggatgta gattctactt atgaaagcag
241 aaggagttt gatcgttata tggatggata tcaaaatggt atgacaatta attaccatgt
301 agatataaat aattatagaa gcgagaatc agctaaatta tttatggatt ctttggattt
361 agaggccaaa ctgcagccc tctctctcc acaaggctat cctaatgcac cttattattt
421 taccctgaa agactagaat gggattataa aaattatcaa ttggataaac tccttgatcc
481 aagaatccct gctatttata gatataattt cccaaggga cttagagcta agatactaaa
541 atttggtgaa gaaaatggca ttaaagaata aagtaattac ataggcagat tagccactac
601 tataatcatg gaagatgggt tatatatggg ataaattaag aaaggataaa agatgagtga
661 aacttatgaa atttatacac ctaatggtgg tatattagat gtggaaaaag aaacgaataa
721 aattttactc tatgatgggg gagctaaggt aggcaaatac acccaagaat attctaaagc
781 tttgtttgaa gccgatagaa ttttaagaac ctctccttat attaattatc aacctaggta
841 tctagatcct gaatttcaca cagggcaaaa atccact

```

//

LOCUS PIMPEBOA\_18 835 bp DNA linear 12-APR-2021

DEFINITION Campylobacter species strain strain.

ACCESSION

VERSION

KEYWORDS .

SOURCE Campylobacter species

ORGANISM Campylobacter species  
Unclassified.

COMMENT Annotated using prokka 1.14.6 from  
<https://github.com/tseemann/prokka>.

FEATURES Location/Qualifiers

source 1..835  
/organism="Campylobacter species"

```

        /mol_type="genomic DNA"
        /strain="strain"
gene     145..639
        /locus_tag="PIMPEBOA_00061"
CDS     145..639
        /locus_tag="PIMPEBOA_00061"
        /inference="ab initio prediction:Prodigal:002006"
        /inference="similar to AA sequence:RefSeq:CKG87598.1"
        /codon_start=1
        /transl_table=11
        /product="methyltransferase small"
        /protein_id="Prokka:PIMPEBOA_00061"
        /translation="MKKKIQELKSINNLSTKQKGNVGEAKMDLYLQGYKRISLNKV
KGLDDKIHHGIDGIYHNPDKNPKYIIAEAKFGKGLKKTGKYKQMSDEWITEESRNL
GVVDKKHRKKIEELLKENNNEVRKDLFHVDKKGNSIKELDKNAKTKNLIERIENGKG
YEER"

```

ORIGIN

```

1 ggaggtaaaa gaagtaagaa aaataaaaat gatagagcaa agcaaataca agcattaataa
61 aataatcagc aaaacaacaa acaaaattca tttttacaag aagttgaaca acaaaaagaa
121 gaggctgaaa aagttttagc agatatgaaa aaaaagatac aagaattaaa aagtattaat
181 aacttaagca caaaacaaaa aggtaattat ggcgaagcta aaatggattt gtattattta
241 aaacaaggct ataaaagaat tagtttaaat aaagtcaaag ggcttgatga taaaattcat
301 catggaattg atggaattta tcataatcca gataaaaacc caaaatatat catcgcagaa
361 gctaagtttg gaaaagggtga ttttaaaaaa actggaaaat acaaacaaat gagtgatgaa
421 tggataacag aagagagtag aaatagactt ggtgtttag ataaaaaca taggaaaaaa
481 atagaagaac ttcttaagga aaataacaat gaagtcagaa aagattttatt tcatgttgat
541 aaaaaaggca atgtgagtat taaagaatta gataaaaatg caaaaaccaa aaacttaata
601 gaaaggatag aaaatggtaa gggatacгаа gagagatгаа gcgtatttta cgaaacatat
661 aatagagtgt gaaaaaaaaa tcaaagaaga tgaaaaaaga ctcttagaac ttccactagg
721 agatgcaaga agggaaaatt attttttttc tataacagat aaaaaaaaaat gtattgctat
781 ggataaatac tctcgtggcg atgatataaa tccagttaaa aaagatttag aagca

```

//

```

LOCUS      PIMPEBOA_19              736 bp    DNA        linear      12-APR-2021
DEFINITION Campylobacter species strain strain.
ACCESSION
VERSION
KEYWORDS   .
SOURCE     Campylobacter species
  ORGANISM Campylobacter species
            Unclassified.
COMMENT    Annotated using prokka 1.14.6 from
            https://github.com/tseemann/prokka.
FEATURES   Location/Qualifiers
  source   1..736
            /organism="Campylobacter species"
            /mol_type="genomic DNA"
            /strain="strain"
  gene     52..183
            /locus_tag="PIMPEBOA_00062"
  CDS     52..183
            /locus_tag="PIMPEBOA_00062"
            /inference="ab initio prediction:Prodigal:002006"
            /codon_start=1
            /transl_table=11

```

```
/product="hypothetical protein"  
/protein_id="Prokka:PIMPEBOA_00062"  
/translation="MPYLLSLSDEEFEKIIFHVSGFSEIDTTLKEAMELRKEKKDE"
```

ORIGIN

```
1 ccaacaaaag attgttttga aagaattaat gccattataa aacctcatgt aatgccttat  
61 ttattaagct taagtgatga agaatttgaa aaaatcattt tccatgtaag cggtttttagc  
121 gaaattgata ctactttcct taaagaagca atggaactca gaaaagagaa aaaagatgaa  
181 tgaaaatatt ttattttata tacaagagat taaaacttgt ttaaaggata aaaatgagcc  
241 aaacaaacia taacacagaa atcaaagagc aagacacca agatgaaatc atttgggaag  
301 gaaaaaagca tataccttcg tttttgcttt attggataac atatattgtg cttttatggt  
361 ttatgcttta tttgcttcct agggcatttg acaatactaa gaattttaaa tggttttgtg  
421 tttttattat gtttcttgta acggtatatg cacttgcaca agagatctat aaagcggcaa  
481 atattaaaag aatttatatc acaaaagaaa aacttgtgat tgagtattat atcaaaaatg  
541 atttggtttt tccttttagga actttttttg tgtattatcg tcacgtgtca tttgtgctta  
601 ctccaggaga tatagtgata tacaccttcg gagataaagt caaagaatac cttgaacctg  
661 gtttattcag tgatggcgat gatccaacia aagattgttt tgaaagaatt aatgccatta  
721 taaaacctca tgtaat
```

//

LOCUS PIMPEBOA\_20 708 bp DNA linear 12-APR-2021

DEFINITION Campylobacter species strain strain.

ACCESSION

VERSION

KEYWORDS .

SOURCE Campylobacter species

ORGANISM Campylobacter species

Unclassified.

COMMENT Annotated using prokka 1.14.6 from  
<https://github.com/tseemann/prokka>.

FEATURES Location/Qualifiers

source 1..708

/organism="Campylobacter species"

/mol\_type="genomic DNA"

/strain="strain"

gene 28..558

/locus\_tag="PIMPEBOA\_00063"

CDS 28..558

/locus\_tag="PIMPEBOA\_00063"

/inference="ab initio prediction:Prodigal:002006"

/codon\_start=1

/transl\_table=11

/product="hypothetical protein"

/protein\_id="Prokka:PIMPEBOA\_00063"

/translation="MLLCFALYLPRLFNPSKEIDYKWFIVFFTFLLVIYALAQKIYK

MANIKRIYVTKELVVEYYIKNDLVFPLGTFVYYRSSSLPSISNPGDIVIYTFGDKV

KEYLEPGLFSDGDDPTKDCFERINAIKPHVMPYLLSLSDEEFEKIISHVSGYNEIGT

TFLKEAMELRKEKKDE"

gene 551..703

/locus\_tag="PIMPEBOA\_00064"

CDS 551..703

/locus\_tag="PIMPEBOA\_00064"

/inference="ab initio prediction:Prodigal:002006"

/codon\_start=1

/transl\_table=11

/product="hypothetical protein"

/protein\_id="Prokka:PIMPEBOA\_00064"  
/translation="MNENIYGSLEFYSKETQSTPSDKRDLGVFGDVAPYALGITEGFA  
TKAFKG"

ORIGIN

```
1 tttttgcttt tttggataac atatattgtg cttttatggt ttgcgcttta tttgtttcct
61 agattattta atcctagcaa agaaatagat tataaatggt ttatagtttt ttttacattt
121 ctttttagtta tatatgcact tgcacaaaag atctataaaa tggcaaatat taaaagaatt
181 tatgtcacia aagaaaaact tgtggttgag tattatatca aaaatgattt ggtttttcct
241 ttaggaactt tttttgtata ttatcgtagt tcgtcacttc catccatatac aaatccagga
301 gatatagtga tatacacctt cggagataaa gtcaaagaat accttgaacc tggttttattc
361 agtgatggcg atgatccaac aaaagattgt tttgaaagaa ttaatgccat tataaagcct
421 catgtaatgc cttatttatt aagcttaagt gatgaagaat ttgaaaaaat catttcacat
481 gtaagcgggt ataacgaat tgggtaccact ttccttaaag aagcaatgga actcagaaaa
541 gagaaaaaag atgaatgaaa atatttatgg aagtttagag ttttattcta aagaaactca
601 aagcactcct agtgataaaa gggatttagg agtatttggg gatgttgctc cttatgcctt
661 aggcattaca gaaggttttg ctactaaagc ttttaagggg taagcaat
```

//

LOCUS PIMPEBOA\_21 586 bp DNA linear 12-APR-2021

DEFINITION Campylobacter species strain strain.

ACCESSION

VERSION

KEYWORDS .

SOURCE Campylobacter species

ORGANISM Campylobacter species  
Unclassified.

COMMENT Annotated using prokka 1.14.6 from  
<https://github.com/tseemann/prokka>.

FEATURES

Location/Qualifiers  
source 1..586  
/organism="Campylobacter species"  
/mol\_type="genomic DNA"  
/strain="strain"

ORIGIN

```
1 aatcaatcac ccaatctact cccataatct catctataaa aggaagcata ccaaattcat
61 caggttttta agtcttagct aaggttttta tttgttgttc tcttaaagga tttttatgca
121 ctctactaa accacttcct actgcaatat ctgcataacc ataaatagca cccaataaat
181 taggtttatc tagtatacta cttcctccgc ttaattgtat ataaagtata gttgcttgga
241 taaatcttgc attaaaacca ttttgagaca tatcgttagc tagatattta taatcaccca
301 gtattcctgc tgccataacc cattcattat gaaataaact tgatctttaga ttatgtttat
361 tatcatctac tgttctatat aattcttcat acttaggatc tacatttcct ttttcatcta
421 cagctcctat agcttcataa ggtatatcta taacaacact tcttatacca cttcttataa
481 ctaaataattt atatctttct ttttttagttt ttagtgagtt ataataagct ttttctgctt
541 tagtccaagg agctatgctt cctttaatgg gatcttttaa atatat
```

//

LOCUS PIMPEBOA\_22 554 bp DNA linear 12-APR-2021

DEFINITION Campylobacter species strain strain.

ACCESSION

VERSION

KEYWORDS .

SOURCE Campylobacter species

ORGANISM Campylobacter species  
Unclassified.

COMMENT Annotated using prokka 1.14.6 from  
<https://github.com/tseemann/prokka>.

```

FEATURES             Location/Qualifiers
    source            1..554
                     /organism="Campylobacter species"
                     /mol_type="genomic DNA"
                     /strain="strain"

ORIGIN
    1  tgccattttc  ttcgccaat  ttgagtatct  tagctctaag  ttcccttggg  aaattatatac
   61  tataaatagc  agggattcct  ggatcaagga  gtttatcaag  cttatgtcct  ttataatacc
  121  attctagttt  ttcaggggta  aaataataag  gtgcattagg  ataaccttgt  ggaggagtga
  181  gggctgcgag  tttggcagtt  aatatcatag  aatctatctt  taattgcgca  tcattccaat
  241  catttgggat  atcataacca  taggcattaa  tcatgccatt  agaataacca  tccatataat
  301  aatcaaactc  ctttctgctt  tcataagtag  aatctatatac  ctttggatct  tttatcttgc
  361  cctcaactac  atcacttctt  aaggctttat  atatatcccc  aaattcatct  tcagaaatct
  421  gatattcggt  ataataatc  acccaatcta  ctccataat  ctcatctata  aaaggaagca
  481  taccaaattc  atcaggtttt  aaagtcttag  ctaaggtttt  aatttgttgt  tctcttaag
  541  gatttttatg  cact

//
LOCUS       PIMPEBOA_23                518 bp    DNA        linear        12-APR-2021
DEFINITION  Campylobacter species strain strain.
ACCESSION
VERSION
KEYWORDS    .
SOURCE      Campylobacter species
  ORGANISM  Campylobacter species
            Unclassified.
COMMENT     Annotated using prokka 1.14.6 from
            https://github.com/tseemann/prokka.
FEATURES             Location/Qualifiers
    source            1..518
                     /organism="Campylobacter species"
                     /mol_type="genomic DNA"
                     /strain="strain"

ORIGIN
    1  cccttgggaa  attatatcta  taaatagcag  ggattcttgg  atcaaggagt  ttatcaagct
   61  tatgtctttt  ataataccat  tctagatctt  caggggtaaa  ataataaggt  gcattaggat
  121  agccttgtgg  aggagtgagg  gctgagagtt  tggcagttaa  tatcatagaa  tctattctta
  181  attgtgcact  ttcttcactc  cgatcatttg  gaatatcata  accataagca  tttaccatgc
  241  cgttataata  tcctccccta  tggcgatcaa  attccccttct  gctttcataa  gtagaatcta
  301  tatctcttgg  atcttttatc  ttgccctcaa  ctacatcact  tcttaaggct  ttatacatac
  361  ttccaaattc  atcgcgagca  attctatacc  tgttataatc  aatcacccaa  tctactccca
  421  taatctcatc  tataaaagga  agcatacca  attcatcagg  ttttaaagtc  ttagctaagg
  481  ttttaatttg  ttgttctctt  aaaggatctt  tatgcact

//
LOCUS       PIMPEBOA_24                518 bp    DNA        linear        12-APR-2021
DEFINITION  Campylobacter species strain strain.
ACCESSION
VERSION
KEYWORDS    .
SOURCE      Campylobacter species
  ORGANISM  Campylobacter species
            Unclassified.
COMMENT     Annotated using prokka 1.14.6 from
            https://github.com/tseemann/prokka.
FEATURES             Location/Qualifiers

```

```
source          1..518
                /organism="Campylobacter species"
                /mol_type="genomic DNA"
                /strain="strain"
```

ORIGIN

```
1 taagttcct tgggaaatta tatctataaa tagcagggat tcttggatca aggagtttat
61 caagcttatg tcttttataa taccattcta gtttttcagg ggtaaaataa taaggtgcat
121 taggatagcc ttgaggagga gtgagggctg cgagtttggc atgaagtatt aaagtatcat
181 taaaaagttg tgccctttct tcaactcaat cattgggtgt atcggtttca taaccttgcc
241 tcataccctt tctatatcca actctataac gatcaaattc ctttctgctt tcataagtag
301 aatctatatac tcttggatct tttatcttgc cctcaactac atcacttctt aaggctttat
361 atatatcccc aaattcatca ttagctaatac tatatttatt taaatcaatc acccaatcta
421 ctcccataat ctcatctata aaaggaagca taccaaattc atcagggtttt aaagtcttag
481 ctaagggtttt aatttggtgt tctcttaaag gattttta
```

//

```
LOCUS          PIMPEBOA_25                507 bp    DNA        linear        12-APR-2021
```

```
DEFINITION    Campylobacter species strain strain.
```

```
ACCESSION
```

```
VERSION
```

```
KEYWORDS      .
```

```
SOURCE        Campylobacter species
```

```
ORGANISM      Campylobacter species
              Unclassified.
```

```
COMMENT       Annotated using prokka 1.14.6 from
              https://github.com/tseemann/prokka.
```

```
FEATURES      Location/Qualifiers
```

```
source        1..507
              /organism="Campylobacter species"
              /mol_type="genomic DNA"
              /strain="strain"
```

```
gene          67..207
              /locus_tag="PIMPEBOA_00065"
```

```
CDS           67..207
              /locus_tag="PIMPEBOA_00065"
              /inference="ab initio prediction:Prodigal:002006"
              /inference="similar to AA sequence:RefSeq:CKG86746.1"
              /codon_start=1
              /transl_table=11
              /product="hypothetical protein"
              /protein_id="Prokka:PIMPEBOA_00065"
              /translation="MWYMKIFKDYQKFTPYGLDFRLYSKDFIAKLDFKDKAYNVLYNT
              GV"
```

ORIGIN

```
1 aacgcaaaaa attaagttgg tttatagggt ttgtgtgtaa tgctcctata ttaattgcga
61 gtgtgtatgt ggtatatgaa aatcttttaa gactatcaaa aattcactcc ttatggtttg
121 gattttagac tttatagtaa agattttatt gccaaacttg attttaaaga taaagcttat
181 aatgtgcttt ataatacagg agttttaaag ggagaagata ttacattttc tatttttttg
241 ggtttatttg gatttattct tgcttttact aatataaaat tttatcttac cactttaagc
301 gttcttattg tcttttctat ttttaattat tggatcaaga ttaataataa agaatttgta
361 aatcttattt ttttaatatc ttttattatc ttttttacag ctattgttat catattttat
421 cttacctatg gtattgaaac ttctaaggat cttgcattgc ttagctctct agaagctaaa
481 gaattgtcac cacaagaata taaagcgc
```

//

>>BfR-CA-15861\_min\_cov\_30 putative plasmid location

LOCUS ECFEEEMN\_1 17665 bp DNA linear 12-APR-2021  
DEFINITION Campylobacter species strain strain.  
ACCESSION  
VERSION  
KEYWORDS .  
SOURCE Campylobacter species  
ORGANISM Campylobacter species  
Unclassified.  
COMMENT Annotated using prokka 1.14.6 from  
<https://github.com/tseemann/prokka>.  
FEATURES Location/Qualifiers  
source 1..17665  
/organism="Campylobacter species"  
/mol\_type="genomic DNA"  
/strain="strain"  
gene complement(370..1278)  
/locus\_tag="ECFEEEMN\_00001"  
CDS complement(370..1278)  
/locus\_tag="ECFEEEMN\_00001"  
/inference="ab initio prediction:Prodigal:002006"  
/inference="similar to AA sequence:RefSeq:AJK71146.1"  
/codon\_start=1  
/transl\_table=11  
/product="type VI secretion protein"  
/protein\_id="Prokka:ECFEEEMN\_00001"  
/translation="MNDLASYSFFKLIKKLEKDYGRKNIFLRTNKS LKHPNKDIEKII  
FSEHEQSVVLELFINFMGLHGVSSQLPSFMLDKLSRNEDGEQGWTLFFDFFNHYLLWIF  
FDVVS LKNYPRSFNENFKDSISQILFNILGIKEHDI AKKYL PFAPLLLSLRPKTHIE  
RVLQVNFKLKDKLSIIENLPHQILISDSQKNKLG IKNHTLGNF ILGDKFISYQNKIA  
IYIKDISYQEAVK FMPNGTKHDDLKNSIMFLTNNEFCVDLYLKINYSSEMKFV LGDEN  
TAKLGWAKILGNAQKKYTIVYMKLCE"  
gene complement(1275..2996)  
/locus\_tag="ECFEEEMN\_00002"  
CDS complement(1275..2996)  
/locus\_tag="ECFEEEMN\_00002"  
/inference="ab initio prediction:Prodigal:002006"  
/inference="similar to AA sequence:RefSeq:AJK71145.1"  
/codon\_start=1  
/transl\_table=11  
/product="type VI secretion protein"  
/protein\_id="Prokka:ECFEEEMN\_00002"  
/translation="MKDNIFYYQKELEYLYEKREHFIKNYPKLT PFLAHDSKDPDIER  
IIENLAILSSKIHQELDENIPHIAESLINIISP NYTNPLPSLCMQEFKFEQNSKENNL  
IIPKGTLIKSKPIDKCVCFKTVYDVLYPISINEVFISSKNQDYTFNLT LQV NKAET  
KICDLGLEKINLYLGNDTYMSSTLLLYMHSYLKELKIQSLDTEEFFLN TYNIEKIGL  
NPDESSLSYNDLGFEAFSLLREYFFMPHKFNFLRINGLDILNNCQGKTINIEFKFSKP  
FPANCIFRKELLSLGMTP IINIFAKSAEPLINNHKKDSYRIFVDRSQPKAYEIIQTLQ  
VKAHNSEGGKRL LKNYKSFERFEFLKDNQKDFYSVNTKKNSKGEV FSEISFFSSCLID  
ETISIDL LSCNGDLP SKLKIGDINTCNLKGVDTKNVEIPSETRRCSVDGNLLWKLVS  
LSFSYQTILSKKAFFGVLESYSFLDNQSNWKIYKLLQEAIIDIQSKSTYLIDENITKK  
GTVAIFSIKDSKFYTLGVEVYLLGLIISKFLASFASINSFCELKIKCLDSKEILHYPAS



```

gene      FGKKALI"
          complement(2993..3385)
CDS      /locus_tag="ECFEEEMN_00003"
          complement(2993..3385)
          /locus_tag="ECFEEEMN_00003"
          /inference="ab initio prediction:Prodigal:002006"
          /inference="similar to AA sequence:RefSeq:CKG87312.1"
          /codon_start=1
          /transl_table=11
          /product="type VI secretion system lysozyme-like protein"
          /protein_id="Prokka:ECFEEEMN_00003"
          /translation="MSLLDKLIHNLDEQNIHIPFYQND FEDVKNNIKVLLNAKINDCY
AVRNLGMPNMADINLNSNELCVSMAKEIRKLIDNYEKRICVVSITYDNSLSPWQLSFI
VKCFFQDDRFKEFNIEIIFKNNRYCEVK"
gene      complement(3388..4842)
          /locus_tag="ECFEEEMN_00004"
CDS      complement(3388..4842)
          /locus_tag="ECFEEEMN_00004"
          /inference="ab initio prediction:Prodigal:002006"
          /inference="similar to AA sequence:RefSeq:AJK71143.1"
          /codon_start=1
          /transl_table=11
          /product="type VI secretion protein"
          /protein_id="Prokka:ECFEEEMN_00004"
          /translation="MANTKVIDTPIIEQIMEKSKYSKTDESYSIAKRGVAEFISEIVK
SDNAEEKINKFALDEMHIAHIDHLLSKQMDEV LHNEEFQKLESTWRGLRFLVERTDFNE
NIKIDLFDITKEEALED FENNPDI TQSIVYKNIYSSEYGFQGGEPVGAIIIGDYQLGSA
SPDMTFLNKMASIAAMSHSPFLTSFGPKFFGLDDYSELANIQDLQGLLEGPQYTRWRT
FRENEDSKYTGLLVTRFLARSPYDPEENPIKSFNYKENVHASHNHLLWANSSYTFCTR
LTESFAKYRWCGNIIGPKSGGTVKDLPTYLYENFGTIQSKIPTEVLITDRREYELAEA
GFITLTLRRDSNNAAFFSANSPLKPKIFQNTPEGKEAETNYRLGTQLPYIFLISR LAH
YLVKVLQREEIGSWKERSDIENGLNEWIRQYISDQENPPSEVRSRRPFRAAQVKVDDIP
GEPGWYKIGLSVRPHFKYMGGNFELSLVGKLDKE"
gene      complement(4844..5329)
          /locus_tag="ECFEEEMN_00005"
CDS      complement(4844..5329)
          /locus_tag="ECFEEEMN_00005"
          /inference="ab initio prediction:Prodigal:002006"
          /inference="similar to AA sequence:RefSeq:AJK71142.1"
          /codon_start=1
          /transl_table=11
          /product="type VI secretion protein"
          /protein_id="Prokka:ECFEEEMN_00005"
          /translation="MSDGS HAPKERINITYKAKTNGQNEDELPLKLMVMANLKGKNE
TPLEEREILQINKINFDQVMRKL DITTSFSVKNTLGTGAEE LDVKLN IASMKDFSPDS
LAKQIPELNKLLQLREALMALKGPMGNIPDFRKAVLEALKNEKTKEKLLLEIKQEEQG
N"
gene      complement(5399..6646)
          /locus_tag="ECFEEEMN_00006"
CDS      complement(5399..6646)
          /locus_tag="ECFEEEMN_00006"
          /inference="ab initio prediction:Prodigal:002006"
          /inference="similar to AA sequence:RefSeq:AJK71141.1"
          /codon_start=1

```

```

/transl_table=11
/product="nucleobase:cation symporter"
/protein_id="Prokka:ECFEEEMN_00006"
/translation="MSFCNQLKNNLDELQEFHLLLEDEMSKYKTLNHNENISWDKVYQYS
QFILLHSLDFKVCNYFLLSFCNLNNEECFEKLLLLFQHLKKLMDENNTYISAQKRKI
QIFIQNFIEYKTKVLSSEIIDQFIALFSEFENLLSCNFAKIEIAQVAPQLPKSPV
AQVSVNIRSDNINSLNEREYKNFYQKLAFELLEEDENNLNIYALFTQAMWGKIKCLPE
CNNEKITKIRKPDADIIRILLSDKENDIEHIKCFMHELILNPFWIEGVQLFCDFLEKK
KKNKQLDILIMLTSDFISKFDAIELLRFQNGDFICKEEVYKYFVKPKENKKSFFSSKK
TDKEHTLQDFEQMLMNIDKENFNNSIMNINSLDMVKIFESKGMKKNKILNIYLVE
LMEKTLKDYLAEEYENAKNKIK"
gene 6769..7215
/locus_tag="ECFEEEMN_00007"
CDS 6769..7215
/locus_tag="ECFEEEMN_00007"
/inference="ab initio prediction:Prodigal:002006"
/inference="similar to AA sequence:RefSeq:AJK71140.1"
/codon_start=1
/transl_table=11
/product="type VI secretion protein"
/protein_id="Prokka:ECFEEEMN_00007"
/translation="MFRKKSLLFLLPLFFCACSSVSVKINNIENSNLNRYDDVPVT
AIVYQLKDIKKFEEASDIDLATREDGVLGKDKLDSIKTQIAPKDNIIVAVKVEGEVPY
VGVLVLFANNTKKVTKIWAKTEDANGFGKNKYLKFEISKEGIKRIK"
gene 7225..8622
/locus_tag="ECFEEEMN_00008"
CDS 7225..8622
/locus_tag="ECFEEEMN_00008"
/inference="ab initio prediction:Prodigal:002006"
/inference="similar to AA sequence:RefSeq:AJK71139.1"
/codon_start=1
/transl_table=11
/product="type VI secretion protein"
/protein_id="Prokka:ECFEEEMN_00008"
/translation="MANKLKVAFDGLNIGQTHFEQQRFFNRNIDLKTINIYSNLYG
IIDLEFSQEMLLQGKIALSKISGIAQDGSIFNAPEQDLLPEPIEINYESLIDSVVVK
IPIGVTDIADLSLRNTPNSKYICLRNSIALRNYDDSKSNAMDKIEDEYELNLTFTQ
EKKDLLASLRLLKLGILGNSTPDELELPIAKIKNIDINKKIELESDFIPTCLNISKIS
TIRSFLEEIIIFSINQHKKVLSNVFKGIDQTKNTLDFSTFLSLNLLKKWYLIFSHLSKK
DKIHPEFLYEKFLFQGELAAFSNEESFLDFIPYKHDNLYNTFLNMMNLRLLFSKIT
SPKYFIAKTSINGNGFYDFIFDNSGILEDAEIYFAIRADVTTTEYLLNMFKIQSKIHTQ
SKIKNIVATQLEGLNVDQVPNIIPSSIPYLNQYVYKIDKRDHLFKDFKNESIISMVLT
NNIKNPDIIIMWAVFQ"
gene 8619..9392
/locus_tag="ECFEEEMN_00009"
CDS 8619..9392
/locus_tag="ECFEEEMN_00009"
/inference="ab initio prediction:Prodigal:002006"
/inference="similar to AA sequence:RefSeq:AJK71138.1"
/codon_start=1
/transl_table=11
/product="glutamyl-tRNA amidotransferase"
/protein_id="Prokka:ECFEEEMN_00009"
/translation="MKEINEEKALSLLLDNSNFDGLKNNKIIDYSLELLLLLSYRLSKI

```

SSMDTSNINQLRETLINKILDITAKLSMCKEYDEKEIIFKFKYCLCVFIDESLMKNELF  
 INFWAHNTLTVRLFDETLGGNNFYDIASSWINNPFKFKDFLEFIYACLILGYKGYNE  
 AKDRDEKIIHFCNNIATSLRPVYKTEEELAFNKAYKIGLEENIWQKFIRLYFKKLIII  
 VPLIVLGVLSFAIFNLETNNLKVDNNISVLIKNLTHIE"

gene 9615..10175  
 /locus\_tag="ECFEEEMN\_00010"

CDS 9615..10175  
 /locus\_tag="ECFEEEMN\_00010"  
 /inference="ab initio prediction:Prodigal:002006"  
 /codon\_start=1  
 /transl\_table=11  
 /product="hypothetical protein"  
 /protein\_id="Prokka:ECFEEEMN\_00010"  
 /translation="MTYILLIIISTILSYLILKFIYKIIFKSTKSVSKFLVFLGSIG  
 LIIFYYPYSYYLEPSYWQFRNMCKLNELPNNEEKYNKILGYFDKKGIDDFRHVKK  
 YGSIEMWLYIYDDTYKTPSNFQEKIEMDNIALKTKNMQMSLHKIVDMHISPYWNTRR  
 YVLEGNEGMNFEFIEDELACGNLYQ"

gene 10194..10520  
 /locus\_tag="ECFEEEMN\_00011"

CDS 10194..10520  
 /locus\_tag="ECFEEEMN\_00011"  
 /inference="ab initio prediction:Prodigal:002006"  
 /inference="similar to AA sequence:RefSeq:CKG86955.1"  
 /codon\_start=1  
 /transl\_table=11  
 /product="methyltransferase small"  
 /protein\_id="Prokka:ECFEEEMN\_00011"  
 /translation="MTNKQLINKLRDMAELAQASYGYFDLVTHDKNDFFIKIKDEATE  
 SAFFNKHITQANVLDISYKNYKAYQYDSSLKDKIKIGTLKGFSPQAKRFFSRVLL  
 KHCPKK"

gene 10719..10820  
 /locus\_tag="ECFEEEMN\_00012"

CDS 10719..10820  
 /locus\_tag="ECFEEEMN\_00012"  
 /inference="ab initio prediction:Prodigal:002006"  
 /codon\_start=1  
 /transl\_table=11  
 /product="hypothetical protein"  
 /protein\_id="Prokka:ECFEEEMN\_00012"  
 /translation="MGILKKVYIVFFGGGYFGELFFCLVLYMLLVI"

gene 11244..11756  
 /locus\_tag="ECFEEEMN\_00013"

CDS 11244..11756  
 /locus\_tag="ECFEEEMN\_00013"  
 /inference="ab initio prediction:Prodigal:002006"  
 /codon\_start=1  
 /transl\_table=11  
 /product="hypothetical protein"  
 /protein\_id="Prokka:ECFEEEMN\_00013"  
 /translation="MKILKSLYIIWMIFWGFGAILGYMGYDATFTKTFFFLVILYLF  
 PLLPYLHYLIFEKTKNKNIFISICYLLLLFVITAYYFTLIYSCGTNFLTFFIMITLYM  
 IICSAIILWFKINLRLYFYIILCIFTYLYIVLHIFIACYEIEWTDILLDKDVRIIYI  
 KEIINLLTEQ"

gene 11799..11948

CDS /locus\_tag="ECFEEEMN\_00014"  
 11799..11948  
 /locus\_tag="ECFEEEMN\_00014"  
 /inference="ab initio prediction:Prodigal:002006"  
 /inference="similar to AA sequence:RefSeq:AAW35443.1"  
 /note="conserved domain protein"  
 /codon\_start=1  
 /transl\_table=11  
 /product="hypothetical protein"  
 /protein\_id="Prokka:ECFEEEMN\_00014"  
 /translation="MKTQINNLRDYTELAWASYFYFDLKG YILQENETIVILNELVSL  
 SYNGN"

gene 12158..12628  
 /locus\_tag="ECFEEEMN\_00015"

CDS 12158..12628  
 /locus\_tag="ECFEEEMN\_00015"  
 /inference="ab initio prediction:Prodigal:002006"  
 /codon\_start=1  
 /transl\_table=11  
 /product="hypothetical protein"  
 /protein\_id="Prokka:ECFEEEMN\_00015"  
 /translation="MQIPIYSK LKAKLESKGIDNISSGQIAWFVCSLILALVTYIILT  
 FHYIYISYGKYDKNLFLLIFDRNAMELFIIIYSCIMFNLLYIYNAIPLVLSAVFIFLA  
 FYFSSLSLFIVGCCGIGVFFLISIFKRKLIPSVLLFTMGYICSYLLLLHAIGTYH"

gene 12639..12791  
 /locus\_tag="ECFEEEMN\_00016"

CDS 12639..12791  
 /locus\_tag="ECFEEEMN\_00016"  
 /inference="ab initio prediction:Prodigal:002006"  
 /inference="similar to AA sequence:RefSeq:CKG86410.1"  
 /codon\_start=1  
 /transl\_table=11  
 /product="hypothetical protein"  
 /protein\_id="Prokka:ECFEEEMN\_00016"  
 /translation="MKYCVTIYIDPLVECFLDFKNQCYWQREDFTHAFLGLTKDKSPD  
 ELDKYR"

gene 12894..13319  
 /locus\_tag="ECFEEEMN\_00017"

CDS 12894..13319  
 /locus\_tag="ECFEEEMN\_00017"  
 /inference="ab initio prediction:Prodigal:002006"  
 /inference="similar to AA sequence:RefSeq:CKG86435.1"  
 /codon\_start=1  
 /transl\_table=11  
 /product="hypothetical protein"  
 /protein\_id="Prokka:ECFEEEMN\_00017"  
 /translation="MQIPIYSK LKAKLESKGIDNITSGQIAWFVCSVGFIFIPMMYLY  
 ISNNYNQFIILFFMIFIFILNMLYTKNFFALLLLVILIFIYMKYHEFIYNFKILFFIF  
 APIILIFLAWRILITFLCGYIFLVAMVYIFELLGGFYK"

gene 13316..13528  
 /locus\_tag="ECFEEEMN\_00018"

CDS 13316..13528  
 /locus\_tag="ECFEEEMN\_00018"  
 /inference="ab initio prediction:Prodigal:002006"

```

/inference="similar to AA sequence:RefSeq:CKG86410.1"
/codon_start=1
/transl_table=11
/product="hypothetical protein"
/protein_id="Prokka:ECFEEEMN_00018"
/translation="MKYYATIYIDPLVECFLDFKNQCYWQIEDFTHAFLGLTKGKSLD
ELDKIDKELKQEYLKNKEFKLIKSIK"
gene 13570..14028
/locus_tag="ECFEEEMN_00019"
CDS 13570..14028
/locus_tag="ECFEEEMN_00019"
/inference="ab initio prediction:Prodigal:002006"
/inference="similar to AA sequence:RefSeq:CKG86435.1"
/codon_start=1
/transl_table=11
/product="hypothetical protein"
/protein_id="Prokka:ECFEEEMN_00019"
/translation="MQIPIYSKLGKLESKGIDNISSGQIAWFCVSVGIVYLLSIFLY
LHGVNKEGISFNRIFIAFYINHHFFCFMLMWFILLNLLYKENTISLILTLTTIAYFY
NPYFAYILIFIICIIMRIINKQRWLYIYFIGLIYIYATYSIFNLRGGFYK"
gene 14025..14126
/locus_tag="ECFEEEMN_00020"
CDS 14025..14126
/locus_tag="ECFEEEMN_00020"
/inference="ab initio prediction:Prodigal:002006"
/codon_start=1
/transl_table=11
/product="hypothetical protein"
/protein_id="Prokka:ECFEEEMN_00020"
/translation="MKYYATIYIDPLDFDKDATHAFLGLPKAKVLMS"
gene 14208..14687
/locus_tag="ECFEEEMN_00021"
CDS 14208..14687
/locus_tag="ECFEEEMN_00021"
/inference="ab initio prediction:Prodigal:002006"
/codon_start=1
/transl_table=11
/product="hypothetical protein"
/protein_id="Prokka:ECFEEEMN_00021"
/translation="MQIPIYSKLGKLESKGIDNITSGQIAWCLGSGYIALICAVFVW
VYKLNLEFELYIVFFFPIILLFYIAIFWFIFLSFYKNFFFIHLFCYSFMYIFNIIIFND
FYLNLVVMNILLITIWLFFVKLHLKFRFLFLMMYFCFEFAIFIGIIPYGLLEGTISK"
gene 14684..14899
/locus_tag="ECFEEEMN_00022"
CDS 14684..14899
/locus_tag="ECFEEEMN_00022"
/inference="ab initio prediction:Prodigal:002006"
/inference="similar to AA sequence:RefSeq:CKG86410.1"
/codon_start=1
/transl_table=11
/product="hypothetical protein"
/protein_id="Prokka:ECFEEEMN_00022"
/translation="MKEIIKYYVTIYIDELLENEMLKHVDFSLLFKAKFSQISKQIDF
THAFLGLTKDKSSDELKIDEELRQKF"

```

gene 14946..15221  
/locus\_tag="ECFEEEMN\_00023"

CDS 14946..15221  
/locus\_tag="ECFEEEMN\_00023"  
/inference="ab initio prediction:Prodigal:002006"  
/codon\_start=1  
/transl\_table=11  
/product="hypothetical protein"  
/protein\_id="Prokka:ECFEEEMN\_00023"  
/translation="MQIPIYSKCLKLESKGIDNISSGQIAWFVCSVIFTYLLFLLIV  
IINTRTISFENLKFFTFEGFFKSLAFIFANHFLLFIFMWIVCIINF"

gene 15468..15647  
/locus\_tag="ECFEEEMN\_00024"

CDS 15468..15647  
/locus\_tag="ECFEEEMN\_00024"  
/inference="ab initio prediction:Prodigal:002006"  
/inference="similar to AA sequence:RefSeq:CKG86410.1"  
/codon\_start=1  
/transl\_table=11  
/product="hypothetical protein"  
/protein\_id="Prokka:ECFEEEMN\_00024"  
/translation="MVECFLDFKNQCYWQREDFTHAFLGLTKGKSPDELDKIDEELRQ  
EYLNKKEFKLIKSIK"

gene 15689..16147  
/locus\_tag="ECFEEEMN\_00025"

CDS 15689..16147  
/locus\_tag="ECFEEEMN\_00025"  
/inference="ab initio prediction:Prodigal:002006"  
/codon\_start=1  
/transl\_table=11  
/product="hypothetical protein"  
/protein\_id="Prokka:ECFEEEMN\_00025"  
/translation="MQIPIYSKCLKAKLESKGIDNISSGQIAWFVCSVVLALVTFLIIY  
FTVIEDKNLFLAIFELFQWQLFIFIIYFCIPFNLLYIHNAIPLVLSAIFMFLTYFS  
SLNLFIIGCCGIGAFFLISIFKRKLMFSVLLFAMGYICIIYFFLYAITRYH"

gene 16203..17429  
/locus\_tag="ECFEEEMN\_00026"

CDS 16203..17429  
/locus\_tag="ECFEEEMN\_00026"  
/inference="ab initio prediction:Prodigal:002006"  
/inference="similar to AA sequence:RefSeq:CKG86410.1"  
/codon\_start=1  
/transl\_table=11  
/product="hypothetical protein"  
/protein\_id="Prokka:ECFEEEMN\_00026"  
/translation="MIKDLLNMKGLDFTHAFLGLTKDKSPDELDKIDKELRQEYLNK  
EWDKIDQKWYAKEPNEFNDGFWGFGTGIANVAESLIGSPGKVFNNNQYVLDNNVDKN  
RYIIKKLRSPQTFKPSNRCTLEISKEQYETLLANIKADFEATKEITPNSEKPINEEFT  
YKLLNENCVTWVVKLSSIGIEVNPVVKDPSGLLMATKLIQSIHSIFLKFQNIIDNL  
QSVKGAKAFKNWARMLINNSLMQEIYLDEYKKQYNSENLSPEQEEVLYALWNITRVYK  
ILGILLSRLITKSGTKNLKGTFFELIYFDKNDKQAKLLKASNHYEAIIIQELDLSSKYN  
NFSASKFYPIFIPKDEMLSRPLYHKYDYGNISSQEQKDRNEFYFNVLAGESDKYWS  
SSYHKMTKNLRKVYVS"

ORIGIN

1 gttgtagggg tgcttagatg agatgaagca ttggttaaag tatttaaaga aaataaatct  
61 tgttctaaac tttcaaaaaa gccttcacat tctatagaaa aaagctcttc aagactttct  
121 ttgatgaggg ctttagtgat tttaaagggt aggggatttg aagtatgatt taatatatca  
181 agactcatat aagaattaag ggacattgat gatccttttg ggtttgttga tgattaatag  
241 ccataagcct atgtgattta ttttagcata aggtgggtaa aataaagttt attttagggg  
301 gtgggtttat gggtaaagag agattgtggg tttttgaaat aaaattttta aatataatct  
361 tgtgttaggc tattcgcata gtttcatata tactattgta tttttttttt gtgcattgcc  
421 taaaatTTTT gccaaccaa gtttggcagt attttcatct cctagcacia acttcatttc  
481 tgaagaatag ttgattttaa gatataaatc aacacaaaat tcattatttg ttaaaaacat  
541 tatactatct ttcaaatcat catgtttggg tccattgggc ataaatTTAA cggcttcttg  
601 atatgaaata tcttttatat aaattgctat tttgttttga taagagataa atttatcgcc  
661 caatataaag ttatttccta gggtatgatt ttttatccct agtttatttt tttgagaatc  
721 tgaaatTTAA atttgatggg gtaaattttc aataattgat aatttatcct taagttttaa  
781 attgacttgt aaaactcttt caatgtgtgt tttaggctgt cttaaactta gtagtaaagg  
841 tgcaaatggg aaatattttt ttgcgatatc atgttcttta attcctaata tattaacaa  
901 aatttgcgaa atcgaatctt tgaatTTTC attaaaagat cgagggtaat tttttaaact  
961 gactacatca aaaaatatcc aaagcaata atgattaaaa aaatcaaaaa ataaagtcca  
1021 acctgtctct ccatcttcat ttcttgataa tttatctagc ataaatgaag gaagttgcga  
1081 agagactcca tgtagcccca tgaatTTTat aaacaattct acaactgatt gttcatgttc  
1141 tgaaaaaatg attttttcta tatctttatt tggatgtttt aagcttttat ttgttcttaa  
1201 aaatatattc tttcttccat agtctttttc tagttttttt attaatttaa aaaaactata  
1261 tgaagcaaga tcattcatat taaagctttt tttccaaagg aggcaggata atgtaaaatt  
1321 tcttttgagt caaggcattt tatctttaat tcacaaaagg agttgatact agcaaaagat  
1381 gtaaaaaatt tagatataat caatccta ataatatacct cgcctaaagt ataaaatttc  
1441 gaatctttaa tactaaaaat agctacgggt cttttttttg tgatattttc atctatTTAA  
1501 taagtacttt tgctttgaat atcaattata gcttcttgta aaagcttata aatcttccaa  
1561 tttgattggg tatctaaaaa gctatagcct tccaacacac caaaaaaagc ttttttgctc  
1621 aatatgggtt gatatgaaaa agataataca gaaacaagct tccataataa gttaccatca  
1681 aactacatc ttcttgtttc gctcggatt tccacatttt tggtatcgac accttttagg  
1741 ttgcaggtat tgatatcacc tttttttaat tttgaaggca aatctccatt agagcataaa  
1801 agatcaatac ttatagtttc atctatTTAA caagaggaaa aaaaggaaat ttcgctaaat  
1861 acctctccct tagaattctt tttgggtatt acactataaa aatctttttg attatctttt  
1921 aaaaattcaa agcgttcaaa acttttatag ttttttaata gccttttacc gccttcaacta  
1981 ttatgtgctt taactttagt tgtctgtatg atttcataag ctttaggttg acttctatcc  
2041 acaaaaattc tataactgtc ttttttatga ttatttataa gaggttctgc actttttgca  
2101 aagatattga taataggcgt catacctaaa gaaagtaatt cttttctaaa aatacaattt  
2161 gccggaaatg gtttggagaa tttaaattca atattaattg tctttccttg gcaattgttt  
2221 aaaatatcta aaccattgat tcttaaaaaa ttaaacttat gtggcataaa aaaatattct  
2281 cttacaagaa aaaaagcttc aaaacctaaa tcattataag ataagctact ttcatctgga  
2341 tttaatccta ttttttcaat attataggta ttaagaaaaa attcttcatc ggtatctaaa  
2401 ctttgaattt ttaattcttt taaataagaa tgcatgtata ataataaagt gctagacata  
2461 taagtatcat tgcctagata taaattaatt ttttctaac ctaaatacaca ttttttgggt  
2521 tctgctttat taacttgtaa tgttaaattg aaagtataat cttgattttt gctagatata  
2581 aaaacttcat tgatggagat aggataaaga tagacatcat aaactgtttt aaattcacia  
2641 acacatttgt ctatcggttt tgatttataa agagttcctt taggaatgat taaattgttt  
2701 tctttactat tttgttcaaa tttaaattct tgcatacata aagaaggtaa aggatttgta  
2761 tagtttgggg aatgatatt gattagagac tctgctatat gtggtatatt ttcatcaagc  
2821 tcttgatgaa ttttagaact gagaatggct aaatTTTcaa taatctttc tatatcagga  
2881 tctttactat cgtgtgctaa aaatggagtt agctttggat agttttttat aaaatgctct  
2941 ctttttcat atagatattc aagttctttt tggtaataaa aaatattatc cttcatttaa  
3001 cctcgcaata tctattgttt ttaaagatga tttctatatt gaattcttta aaacgatcat  
3061 cctgaaagaa acattttaca ataaaagaaa gttgccaagg acttaaaactg ttgtcgtaa  
3121 tgatagaaac tacacatatt cttttttcat agttgtcaat cagttttctt atttccttag  
3181 ccattgatac gcataattca ttagagttaa gattaatct agccatatta ggcattccta

3241 agtttcttac agcgtaacaa tcattaatth ttgcattgag caaaccttt atattgtttt  
3301 ttacatcttc aaaatcattt tggtaaaatg gaatatgaat gttttgctcg tctaaattat  
3361 ggatcagttt atctagcagg gacattatta ttctttatct aattttccta ctaaagaaag  
3421 ttcaaaatta ccacccatat atttaaaatg aggtcggacg cttagtccta ttttatacca  
3481 tcctggctct cctggtatat catcaacttt cacttgtgct gccctgaatg gacgacgact  
3541 tcttacttca gaaggtggat tttcttgatc ggaaatatat tgtctaattc attcattaag  
3601 accatthttcg atatcgcttc tttctttcca actccctatt tcttctcgtt gtaaacctt  
3661 taaatagtgc gccaatcttg aaattaaaaa gatatatgga agctgagttc ctagtctata  
3721 atthgtttca gcttctttac cttctgggggt atthtgaaat atctthggtt ttaatggaga  
3781 atthgctgaa aaaaatgccg cattattact atctcttctt agtgthaaag ttataaaacc  
3841 tgcttcagca agttcatact ctctcctatc tgtaatcaaa acttctgtag gtatthttga  
3901 ttgtatagtt ccaaaattht cataaagata agtaggcaga tccttaacag tccctccgct  
3961 tthtggctct ataatathtc cacaccatct atatthtagca aagctthctg ttaatcttgt  
4021 acaaaaagta tatgaagaat tagcccacaa taaatgatta tgtgaagcat gaacatthtc  
4081 tttataatta aagctthttaa tagggthttc ttcaggatca taagggcttc ttgctaaaaa  
4141 tcttgtcact agcaagcctg tatatthtga gtcttcattt tctctaaaag tcttccatct  
4201 tgtatattga ggcccttcta gcaagccttg taaatcttga atatthgcaa gttcagaata  
4261 atcatcaagt ccaaaaaact ttggctcaaa agatgtthaa aagggagaat gactcatagc  
4321 tgcaatacta gccatthtat ttaaaaaagt catatcagga cttgctgac caagttgata  
4381 atctccgatg attgctccta cgggttctcc tccaaattgt ccatattctg aagaatatat  
4441 atthttataa acaatactth gtgtgatgct tggattatth tcaaaatcct ctaaggcttc  
4501 tctthttgtt atatcaaata ggtcaattht tatatthtca ttaaaatcag tctthtcaac  
4561 tagaaatcta agtccacgcc aagtagattc aagthtttga aattcttcat tatgtaaaac  
4621 ttcattcatt tgtthttgaga gcaaatggct aatatgggct atctthtcat caagtgcaaa  
4681 tttattgatt tthtcttcag cattatcact tthtacaatt tctgaaataa attcagcaac  
4741 acctctthtg gcaatactat aactthtcat agthtttagag tathttgctth tthccataat  
4801 ttgttcaata attggcgtat caattactth agtatthtgc atthttaatth cttgtctctt  
4861 cttgtthgat thtctaaaagt aactthtctt tagthtttht atthtthttaa gcttctaaaa  
4921 cagctthtct aaaatcagga atatthtcca taggacctth taaagccatt aatgcttctc  
4981 ttagctgcaa taatthtatt agctcaggta tthgtthtagc taagctatct ggagaaaaat  
5041 ccttcatact agcaatattg agcttaacat caagctcttc agctcctgtt ccaagagtat  
5101 tthttacgct aaaactcgtt gttatatcga gthttctcat aacttgatca aaattgatct  
5161 tattaatthg caaaatthtct cthtctctca agggagthtt gthttthtct tthaaatthg  
5221 ccattacat taatthttaat ggcagctcca catctcatt tthtccatta gthtttagctt  
5281 tatatgtaat attaattcgt tcctthtgag catgagatcc atctgacatt ttaaatcctt  
5341 aaaaataaaa atthtttagtt caattattat attaaaatth gctaaattht atcttgcac  
5401 atthaattht atthtttgcg tthtcatatt cthcagctag ataacttht agtagagtht  
5461 tthccattaa ctctactaag tatatthttaa aaatthttaga gthtctthtct atthccttht  
5521 attcaaaaat tthttaccata tctagcaagg aatthaatat atthcataata gaattatthaa  
5581 aatthtctth atcaatattc atcagcattt gctcaaaatc ttgtaatgta tthtctthgt  
5641 cagthtttht acttgaaaaa aaactthttht tathttctth aggtthttaa ataatthtatt  
5701 aaacttcttc tthtgagata aagtcacat tthgaaaac gagaagthca atagcatcaa  
5761 atthtagaaat aaaatcactt gthtagcatta tgagaatgct taattgttht tthttthtct  
5821 tthtctctaa aaaatcacia aagagthtgc caccctctat ccaaaaagga tthaaatgta  
5881 gthcatgcat aaaacattht atatgthtcta tatctthtct tthtctcagaa agtaatatac  
5941 gaattatact cgcatcaggt tthtctthtth tagtaattht thcattatth cattcaggca  
6001 aacatthgat tthtccccac atthgctthgg tgaataaagc gtagatattg agatthgttht  
6061 catctcttc taaaagctca aatgcaagth tthgataaaa atthtttatat tctctctcgt  
6121 ttaaggagth aatattatcg cthtctaattg ttacagatac ttgagctaca ggagattht  
6181 gaagctgtgg tgcaacttga gcaatthcaa tthttgcaaa atthgcaagat agtaaattht  
6241 caaattcggg aaacaaagcg ataaatthgat caataatctc agatgataca agcacttht  
6301 tthtgttata thcttgaata aaatthtgaa taaaaatthg aatthttctc tthtgggctg  
6361 atataataag atthattthtca tccataagth tthttaaagth ttgaaaaaga agcaaaagth  
6421 tthcaaagca thcttctattg tthaaatthga agcacgataa aagaaaatag ttacaaactt



6481 taaaatccaa agaatgatgc aataatataa attgagaata ttgataaact ttatcccaag  
6541 aatatTTTTc atgattttaa gtcttatatt ttgacatctc atcttcaagt aagtgaat  
6601 cttgcagctc atctaaatta tttttcaatt ggttacaaaa agacatttaa ttcctccaaa  
6661 aatttgccctc attataatta aattttaaaa aatattatgt taatttttta aaaaaattac  
6721 ccaattaatc acaaattata ttatttatag aaaggatacc ttagttttat gtttcgtaaa  
6781 aaaagcttat tttttttatt gccgttgctt ttttgtgctt gctcaagtgt tggtagtggt  
6841 aagataaata atatagaaaa ttccaatcct aataacagat atgatgatgt tcctgttaca  
6901 gctattgtat atcaacttaa ggatattaaa aaatttgaag aagcaagtga tatagatttg  
6961 gccactagag aagatgggggt attaggcaag gataagcttg attctattaa aacgcaaatt  
7021 gcacctaaag acaatattat cgcggtttaa gtagatgaag gagaggttcc ttatgtaggt  
7081 gttcttgtat tgtttgcaaa taatacaaaa aaagtaacaa aatatgggc aaagaccgaa  
7141 gatgcaaatg ggtttggaaa gaataagtat taaaatttg aatatccaa agaaggcatt  
7201 aaaagaatta aataggaatg atatatggca aataaattaa aagttgcttg gtttgatggg  
7261 cttaatattg gacaaacca ttttgagcag caagaaagat tttttaatag aatatagat  
7321 cttaaaaacta taaatatata tagtaattta tatggaataa tagacttggga attttctcaa  
7381 gagatgttat tgcaaggaaa aattgcactt tctaaaattt caggcatcgc gcaagatgga  
7441 agtattttta atgcacctga gcaagattta ttaccgaaac ctatcgaat caattatgaa  
7501 tctttaattg attcagttgt ggtattaaaa attcctattg gggttactga tattgctgat  
7561 ttgtctttaa gaaacacttt tccaaattca aagtatatat gtcttcgaaa tagtattgct  
7621 ttaagaaatt atgatgattc aaaatccaac gcaatggaca aaattgaaga tgagtacgaa  
7681 cttgaaaatc tgacttttac gcaagagaaa aaagatctac ttcttgctag ttaagatta  
7741 aaacttggca ttttaggtaa ttcaactcct gatgaacttg aattgccaat tgcaaaaatt  
7801 aaaaatcgcg atatcaataa aaaaatcgaa ttagaaagtg attttatacc tacttgttta  
7861 aatatcagta aaatatctac cataagatct tttttggaag aaatcatttt ttcaatcaat  
7921 caacataaaa aagttctatc taatgttttc aaaggaattg accaaacaaa aaatacattg  
7981 gatttttagta cttttttatc tcttaatcct ttaaaaaaat ggtattttaa attttccat  
8041 ctatcaaaaa aagataaaat acatcctgaa tttttatacg aaaaattttt agaatttcaa  
8101 ggagagcttg cagcttttag caacgaagaa tcttttttag attttattcc ttataaacat  
8161 gataatcttt ataatacttt tttaaatatg atgaataatt taagattggt attttccaaa  
8221 atcacaagtc ctaaataattt tatagctaag accagtatta atggcaatgg tttttatgat  
8281 tttatttttg ataattcggg aatttttagag gatgctgaaa tttattttgc aattcgtgca  
8341 gatgttacta cagaatatct acttaataat tttaaaattc aaagcaagat acatacgcaa  
8401 agtaaaatta aaaatatagt agcaacacag cttgaaggct taaatgtaga tcaagtacct  
8461 aatattccat ctagtattcc ttatttfaat ggttacgttt attataaaat agataaaaaga  
8521 gatcatctgt ttaaagattt taaaaatgaa agtatcatta gtatgtactt gaccaacaat  
8581 ataaaaaatc ctgatattat aatgtgggcg gtatttcaat gaaagaaata aacgaagaaa  
8641 aaaaggcatt aagcttactt cttgattcaa attttgatgg tttaaaaaac aataaaatta  
8701 ttgattattc tttggagtta cttttgcttt cttacagact ttcaaaaata agctctatgg  
8761 atacaagtaa tattaatcaa cttagagaaa cattgattaa taaaatttta gatataaccg  
8821 ctaaactaag catgtgtaaa gaatatgatg aaaaagaaat tattaatttc aatattgtc  
8881 tttgtgtctt tatagatgaa agcttgatga aaaatgaact ttttatcaat ttttgggctc  
8941 acaatactct aactgtaaga ttatttgatg aaaccttagg tggaaataat ttttatgata  
9001 ttgcatcatc ttggattaat aatcctttta agtttaaaga ttttttgtaa tttatttatg  
9061 cttgtttgat tcttggttat aaaggaaaat ataatgaggc taaggataga gatgaaaaaa  
9121 taatccattt ttgcaataat attgccacat ctttaagacc agtttataag acagaagaag  
9181 agttagcttt taataaagca tacaaaattg gtttgaaga aatatatttg caaaaattta  
9241 taagattgta ttttaaaaaa cttattatca ttgtgccagt attgattgta ttaggagtat  
9301 taagctttgc aatttttaat ttagaaacca ataacttaa agtggataat aatatatccg  
9361 tattgataaa aaatttaaca catatagaat aaagatatta aattttttta aatatcaatt  
9421 ttttgtgat gagtaaaatt aaataaaaaat tttttacag ctagaataaa aatcaaatgc  
9481 aatctaaag gataaaaaa tacgaaaaaa caagctctat tttttaatg ataaagaaaa  
9541 agttatactg ctaaacactaa actacaaaat tacatcttaa ttttaataaa atagagagtc  
9601 taaggagata acctatgaca tatatattac ttcttattat aatttctact attctttctt  
9661 atcttatatt aaaatttatt tataaaatca tctttaaatc tacaaaaagc gtttcaaagt

9721 ttttagtctt tcttggaagc ataggtttaa ttatctttta ttatactcct tattcttatt  
9781 atttagagcc tagttattgg caatttagga atatgtgtaa gttaaatgaa cttcctaata  
9841 acgaagagaa atataataag attctagggt attttgataa aaagttagggt gacatagatg  
9901 attttcgaca tgtaaaaaaa tatggtagta tagaaatgtg gctttatata tattacgatg  
9961 atacttacia aactccttca aattttcaag aaaagataga gatggataat attgcactaa  
10021 aaacaaaaaa tatgcaaatg tctttacaca agattgttga tatgcatata agtccatatt  
10081 ggaatactag aaggtatgtg ttagaaggca atgagggtaa tatgaatttt gagtttatag  
10141 aggatgagct cgcttgtggc aatctttatc aataataata taaggaataa ataatgacca  
10201 ataaacaact tattaataaa ctaagggata tggcggaaact tgcacaggca agttatgggt  
10261 attttgattt ggtaacacat gacaagaatg attttttcat taaaattaaa gatgaagcta  
10321 cagaatctgc tttctttaat aagcacatta ctcaagctaa tgtcttagat attagttata  
10381 aaaattataa ggcatatcaa tatgactcat ctttaaagaa agatattaaa attggcactc  
10441 tcaaaggcga cttctcccca ctccaagcca aacgattcct ttctcgctat gatttattaa  
10501 aacattgtcc taaaaaatga aaataaaagt atcatatttg taggacattc tctggtgggt  
10561 atttagctca aatggctttg atatattgtg attaaatata aagatttata cttttaatac  
10621 tcttagtatt tacgtttgaa atgttcctag tgtggttata ttttgatttt taaaaaaaag  
10681 taggataatt ttattaataaa tattaataaag gaaaataaat gggatatatta aaaaaagtat  
10741 acattgtttt ttttgggggg ggggtattttg gggaattatt tttttgttta gttctttata  
10801 tgcttatttt agtgatatag aattttttgg tgatatgtta aagattgcat tttttatata  
10861 ttcttatcca ttgttgcctt acatatcata tttaacacta caagaaagta ttaaatccaa  
10921 aatatttttt ctttattttt ctttattttg ctttattttt ctttatctcg ggaggatttt  
10981 ttatttatgc aataatatta ggtatttata caatattatt ttttaataata tctattaat  
11041 ttagaaaaga actttcttat tatttttctt tattgttttg tttttttta tacatttttt  
11101 tgtatctttt tttttttat atagaattaa aaaatgagta ataaagctca aattaacaat  
11161 ctcaaaaatt acgctaaact tgtatagatt ggtttttta attttttaat aataatttaa  
11221 atttcaacaa aaaaggaagt agtgtgaaaa tattaataaag tttatatatt atttggatga  
11281 tttttggggg atttggggct attttaggtt atttatggg atagatgca acttttacta  
11341 aaacgttctt ttttcttgtt atattatatc tttttccatt gttgccttat ttgcattatt  
11401 taatttttga gaaaacaaag aacaaaaata tattcatttc ttttgttat tatctactat  
11461 ttttgttat taccgcttat tttttactt taatatattc atgtggaaca aattttttaa  
11521 cattttttat aatgattact ttatatatga ttattttag tagctataatc ttatggaaat  
11581 ttaaaataaa tttaagatta tttttttaca taattttatg ttttttact tatctctata  
11641 tagttttaca tttttttata gcatgttatg aaatagaatg gacagatata ctgctagata  
11701 aagatgtaag gatatatatt tacaagaaa taattaattt gcttacagag caataatttg  
11761 ttttataata aatcttattt ttatagggga ataaattaat gaaaaccaa atcaacaatt  
11821 taagagatta tacagagctt gcatgggcta gttattttta ttttgattta aaaggttata  
11881 tattacaaga aatgaaact atcgttattt taaatgagct tgtaagttta agttataacg  
11941 gaaactgata attttattga ctcggttcaa gacatagccc tatcttttaa tgacattatc  
12001 caattttttc ctctttttaga ataagtagat aaaataaatg aagctaaaga gccttgtgaa  
12061 tttaatgatg atttcaagaa attttttctt actgaaacaa tcaaattttt aaataaattg  
12121 tcttataata gaataactta ttatattagg agcaaatttg caaattccta tttattctaa  
12181 actcaaagca aaactagaaa gcaaaggaat agacaatata tcaagcggac aaattgcttg  
12241 gtttgtgtgt agtttgattc ttgctttggg gacttatatt attctaactt ttcactacat  
12301 ttacattagt tatggtaaat atgataagaa tttattttta ttaatatttg atagaaatgc  
12361 aatggaatta tttattatta tatattcttg tataatgttt aatctattat atatttacia  
12421 tgccattcct ttggttttat ctgcagtatt tatatttttg gcattttatt tttctagttt  
12481 aagcttgttt attgttgggt gttgtggcat aggagtattt ttcttaatat ccattttcaa  
12541 aagaaaactt atacctagcg ttttgttgtt tactatgggt tatatttgct catatctctt  
12601 acttcatgca attggaactt atcattagga ttttataaat gaagtattgt gtaacaattt  
12661 atattgatcc attggtagaa tgttttttgg attttaaaaa tcagtgttat tggcaaagag  
12721 aagatttcac ccacgccttt ttaggactta ccaagataa aagtcccgat gagttagata  
12781 aatatagatg aagaattaaa acaagaatat cttaaaaaca aagaatttaa attaattaaa  
12841 agtattaagt agattgggtta taataaaaca atttatctat attaggagta aatttgcaaa  
12901 ttcctattta ttctaaactc aaagcaaac tagaaagcaa aggaatagac aatataacaa

12961 gcggacaaat tgcttggttt gtgtgtagcg taggtatfff tatcattcct atgatgtatc  
13021 tttatatcag caacaattac aatcaatffa ttatfffgtt ttttatgata tttatfffta  
13081 tattaatat gctttatact aaaaatfftt ttgcattatt attacttgta atattgatat  
13141 ttatatatat gaaatatcat gagtttatct ataatfftaa aatffttatt tttatffttg  
13201 cacctataat tcttatcttt ttaagggtct ggagaatfff aataactfff ttatgctgat  
13261 atatfftttt agtggctatg gtatatatat ttgagttatt aggaggattt tataaatgaa  
13321 atattatgca acgatttata ttgatccatt ggtagaatgc tttttggatt ttaaaaatca  
13381 gtgttattgg caaatagaag atffttacca cgctffctta ggacttacca aaggcaaaag  
13441 tcttgatgaa cttgataaaa tagataaaga attaaaacaa gaatatctta aaaacaaaga  
13501 atfftaaatta atffaaagta ttaagtagat tggttataat aaaacaatff atctatatta  
13561 ggagtaaatt tgcaaattcc tattttattct aaactcaaag caaaactaga aagcaaagga  
13621 atagacaata tatcaagtgg acaaattgct tggtttgtgt gtagttagg gatagtatat  
13681 ttgctffcta tttttttata tttgcatggc gttataaag agggaatff cgtttaataga  
13741 atatfftttg cattttatat aaatcatttc ttttgtffta tgttgatgtg gtttattffa  
13801 ttgttaaatt tactttataa agaaaatact atffctataa tattaacatt attaacaacc  
13861 attgcctatt tttataatcc atatffttgct tatatffftga tttttatcat ttgcatcatt  
13921 atgctgataa taaataaaca aagatggctt tatatatatt ttattggttt aatfftatatt  
13981 tatgccacct atagtatatt taatfftaaga ggaggatfff ataaatgaaa tattatgcaa  
14041 caatfftatat tgatccgcta tttgattffa aagatgctac ccatgccttt ttgggcttac  
14101 caaaggcaaa agtcctgatg agttagataa aatagataaa gaattaagac aaaaatffta  
14161 agcaaatag tttataataa aacaatffat ctatattagg agtaaattg caaattccta  
14221 tttattctaa actcaaagca aaactagaaa gtaaaggaat agacaatata acaagcggac  
14281 aaattgcttg gtgtttaggg agtggctata ttgccttaat atgtgccgtg tttgttgtg  
14341 tatataaact taagaatttg gaatttgagc tttatattgt tttttcttt cctatcttg  
14401 tattttatat tgctatattt tggtttattt tcttaagtt ttataaaaa tctttttta  
14461 ttcattcttt ttgctattct tttatgtata tctttaatat aatffttaat gatttttatt  
14521 taaatcttgt ggtaatgaat atffttatfa taacaatat gctctttttt gttaaattac  
14581 atffaaaatt tagatfffta tttttaatga tgtatffttg ttttgaatff gcgatattfa  
14641 taggaatcat accttatgga cttttagaag ggactatff ccaaatgaaag aaataataaa  
14701 atattatgta acaatffata tagatgagtt attagaaaat gaaatgttaa agcatgttga  
14761 tttttcttta ctatfftaaag caaaatfftc tcaaatffct aagcaaatcg acttcacca  
14821 cgctffftta ggacttacca aagataaaa ttctgatgag ttagataaaa tagatgaaga  
14881 ataaagacaa aaatfftaag caaatagtt tataataaaa taatfftatct atattaggag  
14941 taaatffgca aatccctatt tattctaaat taaaaacaa gctagaaagt aaaggaatag  
15001 acaatataatc aagcggacaa attgcttggg ttgtgtgtag tgaatffttt acctatffat  
15061 ttttttatt aattgtaatt ataaatacta gaacaatat ttttgaaac cttaaatff  
15121 ttactffftga aggtfffttc aaatctcttg cttttatff ttgcaaatcat tttttttat  
15181 ttatffftat gtggattgft tgtataataa atffftffta atataaaaa tffaattcca  
15241 ataactataa attggataat aagctattgt tattffgttc ttgaaatfaa tattatfftt  
15301 atffttgatt tatgtataac cttttgtgtt gtatffttatt ttttcaaaa aagattatta  
15361 tatactfftt tattttattt tgtttatatg gtatfftaact atactffgtt ttatcttggg  
15421 ggaggatfff ataaataaaa tattatgtaa caatfftat tgatccattg gtagaatgft  
15481 ttttggattt taaaaatcag tgttattggc aaagagaaga tttcaccac gcctfffttag  
15541 gacttaccaa aggtaaaagt cctgatgagt tagataaaat agatgaagaa ttaagacaag  
15601 aatatcttaa aaacaaagaa tftaaatfaa ttaaaagtat taagtagatt ggttataata  
15661 aaacaatffa tctatattag gagtaaattt gcaaatctct atfftttcta aactcaaagc  
15721 aaaactagaa agtaaaggaa tagacaacat atcaagtgga caaatgctt ggtttgtgtg  
15781 tagttagtct cttgctfftg tgactffftct tattatctat tttacagtga ttattgaaga  
15841 taaaaatffa ttttagcaa ttttgaatt gtttcaatgg caactatffa tttttatcat  
15901 atactffftg atccctffta atctattata tattcataat gctatffctt tagtgctgtc  
15961 tgcaatattt atgtffftaa cattgtattt ttctagctta aatffatffa ttatcggtg  
16021 ttgtgggata ggagcatttt tcttaatatc cattffftaa agaaagctta tgtttagtgt  
16081 tttgttggtt gctatgggtt atatffttat ctatfffttt ctttacgcaa taactcgcta  
16141 tcattaagaa acaaaatgaa gtattatgta acgattffta ttgatgagtt attagaatfc

```

16201 aaatgataaa agatttgctg aatatgaaag gtttagactt cacccacgct ttcttagggc
16261 ttactaaaga taaaagtcct gatgagttag ataagataga taaagaatta agacaagaat
16321 atcttaaaaa caaagaatgg gacaagatag atcaaaaatg gtacgaagct aaagagccta
16381 atgagtttaa tgatggtttt tggggttttg gaactggaat tgctaattgt gcagaatctc
16441 ttataggatc tcctggcaaa gtatttaata ataaccaata tgtattagat aacaatgttg
16501 ataaaaatcg ctatattatt aaaaaactaa gaagccctca aacttttaa ccctctaadc
16561 gttgcacttt agaaatttct aaggaacaat atgaaacctt acttgcaa attaaagctg
16621 attttgaagc cacaaaagaa atcacaccta atagcgaaaa gccaatcaat gaagaattta
16681 cctataaact tcttgaaaat aattgcgcta cttgggttgt taaaaagctt tctagcatag
16741 gaatagaagt tgtaaatccc gttgttaaag atcctagcgg attattaatg gctacaaaat
16801 taatacaaag cattcattct atctttttaa aatttcaaaa cattgatgat aatttacaaa
16861 gcgtaaaagg tgcaaaagct tttaaaaatt gggctagaat gcttataaat aattcattaa
16921 tgcaagaaat ttatcttgat gaatataaaa aacaatacaa tagtgaaaat cttagtccag
16981 aacaagaaga agttttatat gctttatgga atattacaag ggtttataaa attttaggca
17041 ttcttttaag tcgtttaatt acaaaatcgg gcactaaaaa cctaaaaggc acttttgaat
17101 taatttattt tgataaaaaat gataagcaag caaagctttt aaaagcgagt aatcattatg
17161 aggcgattat tatacaagaa ctagatttaa gtaaaaaata caataatttt agtgcgagta
17221 aattttatcc ttttatcttt atacctaaag atgaaatgct ctcaagaacg ctttatcata
17281 agtatgatta tggtaatatc tcacaagaat atcaaaaaga tagaaatgaa ttttatttta
17341 atgttttagc aggagaaaaa agcgataaat attggagttc tagctatcat aaaatgacta
17401 aaaatttaag gaaagtctat gtctcttgaa aaaatcaaag aaacgatttt tgcttatgat
17461 aaagaagtga ttgattgtga agttttaagg gctaaaaata ttgatgtaat tcattctaaa
17521 atttattttc aaggtatact cttacaggc tccaccgaac tccctaataa tcctttttac
17581 tttggagaat tagatcaaga taatactata aaacaagata taccagttta ttatttttct
17641 cctaaagatg aaagcagtgg ttttag

```

//

LOCUS ECFEEMN\_2 17527 bp DNA linear 12-APR-2021

DEFINITION Campylobacter species strain strain.

ACCESSION

VERSION

KEYWORDS .

SOURCE Campylobacter species

ORGANISM Campylobacter species

Unclassified.

COMMENT Annotated using prokka 1.14.6 from  
<https://github.com/tseemann/prokka>.

FEATURES Location/Qualifiers

source 1..17527

/organism="Campylobacter species"

/mol\_type="genomic DNA"

/strain="strain"

gene 177..1025

/locus\_tag="ECFEEMN\_00027"

CDS 177..1025

/locus\_tag="ECFEEMN\_00027"

/inference="ab initio prediction:Prodigal:002006"

/codon\_start=1

/transl\_table=11

/product="hypothetical protein"

/protein\_id="Prokka:ECFEEMN\_00027"

/translation="MPIYLLINNEKKEQDKALNEFNIEQDKLDIEDINIFNQFKQD  
FSKDHEFKELNLSFDTNLIKLYFIIPKNIKVYKSAYKEFKNKDLGAGYFTQLHEYDK  
IIKNSLEDKKELNEYHLTFLTPAKMQNLKLQIAQGLDKILEDEDRKQELYVCKFVVVN  
GVSENKIKAKNKDVNIDNNTKNINTTKSNISSSESNAQEKITHLSNDGQNLKNIK

```

LRLKPYNDQNGKEITSYVKGATIGYGHLIGQNEWDLYKNGITLQEADKLFKSDLLPFE
NAVKIQ"
gene      1261..1620
          /locus_tag="ECFEEEMN_00028"
CDS      1261..1620
          /locus_tag="ECFEEEMN_00028"
          /inference="ab initio prediction:Prodigal:002006"
          /inference="similar to AA sequence:RefSeq:CKG86986.1"
          /codon_start=1
          /transl_table=11
          /product="hypothetical protein"
          /protein_id="Prokka:ECFEEEMN_00028"
          /translation="MVIFKNILLFLFFSTYLLAQEDFTPLEQCTYENEKFWIKILNLC
LEGNITCDKIVYVGVNKNNGKYIVLNGKSISDVNMNFKGYVFKNGIYEYNIFFNFLYI
SKNKQIIQEYRLKLCEK"
gene      1885..5880
          /locus_tag="ECFEEEMN_00029"
CDS      1885..5880
          /locus_tag="ECFEEEMN_00029"
          /inference="ab initio prediction:Prodigal:002006"
          /inference="similar to AA sequence:RefSeq:AAW35464.1"
          /note="conserved hypothetical protein"
          /codon_start=1
          /transl_table=11
          /product="hypothetical protein"
          /protein_id="Prokka:ECFEEEMN_00029"
          /translation="MFISSKTELIQTIKNSTINNKEVKQIDFIYPNFSILHAILKNID
FHQRKILFKNQILAMEILEILKQTRDNHNNIEVNIHTLNELDAGQNVNLDLSSEIC
TKVYLEDLEEEIQDKKQKDFNLFYHTDKNNLCIEFINTLKEKAKDSEIDITLDELIE
NIDPDDISSEKFDFFKVKVLEKIGNVIESDFFKNSISPTLKNTYEKFIDELLEHIKKL
AEEKEYEKIKIILSAIAGVAIATVVAVLTGGAGLAILAAGLFSLMGSASEYYEFAQRD
YGTLLTPLAFLATRCAMFIHYINSRLLSCVLIIDKKEIIDLSGFGLYLGSDENIAS
NLAYKITLSEEIKSIENIFSEIFLNPEQKDNESKNTANDSKSSNLLAFISTQKLSNLY
LKNNAILKNLQEDIKQFIYFSYIESPNFNSSKLAEFFAQKNQNTQIDLNTTKMSKNYL
IISNIPNKYNAGLSESLTQEIANYNIQDKYRTIKKNIDTSKKTYPDSTRDYSEYSIEIP
QDENEPYILQLSPFVKISKEAYENSKKAYEDMQEIYKYLTFVATPQKLPEFAKTAKE
KLAISENESMIEIVKKTENLRHCERINILAYIDYNKKINDKKWLPYFYIKKFFKQNE
KESIIKEKKIAHQYLTFLKKELEKSDKSSFGNYSLSKSSFGNYSLSKSSFGNYS
LMECLFISFVLYQAKLIFPNINLDLKKYGGSNFVYIKYLEETYVLWTDEYPIYVNNP
TNITAYEVVSQLLKILDKKDYSFVENDSSITIDDFNELSKDLDTNTLDKKIILKQ
MYHLDEQKCIKFMNLDEEAQRAFFVWMDIEKQISDLSKLLLEQMYGKEYLNKAKEQKT
SEIFTYAMLKILLSASPFI SFTAQMLWDFNFKTIEYVIQACIKINKEGFKEFFKEQL
GIFTPKKNSIYHIHKSNIILKACLQQIEKELTHTKIQMILAQEIKSNLIQKNTSD
LNLFITKIKEYFNEKQIKIYWSDKYMKQLFIYSNQESNISKIALMHSIDIQTQKYTIY
TYAKLNKLDLASIVAGEFVGIFLNLYFPTNYKALQEYESIVYQLYTFKDDSPHAVIR
DHFITYPFAINSKFI SFDLKKIFYGIDLCTGVFDTHFSFHYEIDQKLEENKEFLKRL
LSYLIIDEKRSATALEDIKEQKYIIDDYTFYFKELKSLELKKCTIYQLPCNHSLFKEF
RNKEKQISAFKDEDSPIHAYNEALQILQDFANGLYIVKYEEGKCIEDKNKTRRLLEK
LNIIGQNNLKAMYMGINGNKESLKAIGKRENNTSKANINADIVSETKAPPNFIGRLAT
TIIIEDGLYIG"
gene      5899..7167
          /gene="trxB_1"
          /locus_tag="ECFEEEMN_00030"
CDS      5899..7167

```

```

/gene="trxB_1"
/locus_tag="ECFEEEMN_00030"
/inference="ab initio prediction:Prodigal:002006"
/inference="similar to AA sequence:RefSeq:CKG87041.1"
/codon_start=1
/transl_table=11
/product="thioredoxin reductase"
/protein_id="Prokka:ECFEEEMN_00030"
/translation="MSETYEIYTPNGLTLDVEKDTNKILFKENIKPTGNYTEEYSKAV
FKSYYIMKNSPYKDYKPIYLDPNFYTGKSTLLEFKEWQNIYKDPKIGSIAPWTKAE
KAYYKSLKTKRERCKYLAIIRSGLSVVIDIPYDAYCNVDEKGYLINEEYAYIYDEVSS
HRGTLKSYSFFNEWELAALLLGD MRASPTAAVGFKARQQALFLQAQFGDKNAFKSLG
LAVLCSNSFLTGHWNKLRKMIYDLHDHYESLLDEFGMLPFLDEIIGADWTIDLNK
YDFAYDEEGRIIWALYNDIEKGLKDP RDVDSTPESRNEFDDAMD RYENGMVTRFDVD
TPNEWSEQQAALDRDTLVLSAKLAALTPPQGYPNAPYYFTPERLEWIYKRGYLDKLLD
PRIPAIYRYNFPRELRAKILKFAEENGIKE"
gene 7250..8395
/locus_tag="ECFEEEMN_00031"
CDS 7250..8395
/locus_tag="ECFEEEMN_00031"
/inference="ab initio prediction:Prodigal:002006"
/codon_start=1
/transl_table=11
/product="hypothetical protein"
/protein_id="Prokka:ECFEEEMN_00031"
/translation="MSETYEIYTPNGLTLDVEKDTNKILFKENIKPTGNYTQEYSKAV
FKSYYIMKNSPYKDYKPIYLDPNFYTGKSTLVEFKEWQSIYKDPKIVAQNITNICI
NYVKKGFKEVLIEQLGIIYLLTHPQIEVEVKKYGKGYFKTINKEIAAKRFSTIKEELF
FNKTKISFMAEQVKNIDYEIDQKLEENKEFLLRLLSYLIIDEKRSATALEDIKEQK
YIIDDYTFYFKELKSLELKKCTIYQLPCNHSLFKEFRNKEKQISAFKKDEDSPIHAYN
EALQILQDFANGLYIVKYEKGKCIEDKNKTRRLLLEKLNIIIGQNNLKAMYMGINGNKES
LKAIGKRENNTSKANINADIVSETKAPPNFIGRLATTIIIEDGLYIG"
gene 8414..9682
/gene="trxB_2"
/locus_tag="ECFEEEMN_00032"
CDS 8414..9682
/gene="trxB_2"
/locus_tag="ECFEEEMN_00032"
/inference="ab initio prediction:Prodigal:002006"
/inference="similar to AA sequence:RefSeq:CKG87041.1"
/codon_start=1
/transl_table=11
/product="thioredoxin reductase"
/protein_id="Prokka:ECFEEEMN_00032"
/translation="MSETYEIYTPNGLTLDVEKDTNKILFKENIKPTGNYTEEYSKAV
FKSYYIMKNSPYKDYKPIYLDPNFYTGKSTLLEFKEWQNIYKDPKIGSIAPWTKAE
KAYYKSLKTKRERCKYLAIIRSGLSVVIDIPYDAYCNVDEKGYLINEEYAYIYDEVSS
HRGTLKSYSFFNEWELAALLLGD MRASPTAAVGFKARQQALFLQAQFGDKNAFKSLG
LAVLCSNSFLTGHWNKLRKMIYDLHDHYESLLDEFGMLPFLDEIIGADWTIDLNK
YDFAYDEEGRIIWALYNDIEKGLKDP RDVDSTPESRNEFDDAMD RYENGMVTRFDVD
TPNEWSEQQAALDRDTLVLSAKLAALTPPQGYPNAPYYFTPERLEWIYKRGYLDKLLD
PRIPAIYRYNFPRELRAKILKFAEENGIKD"
gene complement(9687..10586)
/locus_tag="ECFEEEMN_00033"

```

CDS complement(9687..10586)  
 /locus\_tag="ECFEEEMN\_00033"  
 /inference="ab initio prediction:Prodigal:002006"  
 /inference="similar to AA sequence:RefSeq:CKG87069.1"  
 /note="Uncharacterized conserved protein%2C contains FHA domain"  
 /codon\_start=1  
 /transl\_table=11  
 /product="hypothetical protein"  
 /protein\_id="Prokka:ECFEEEMN\_00033"  
 /translation="MIEKEKLGIAIENYDECISGSKAFVFDTKGGTIGSGDDCTFRIQ  
 DKLEQIKNTHAIVSYEEGSFTIAAFEDSDIYYNKSFSRMPSGYEEIIISIGDIFKIGNL  
 EFRFVDAKSIEESIKENKKYLEDIEKRNHFEIEIEPRGKTSINFDKNEELKEILKNN  
 NYKFIEEEKADDSFLKEIIQRDPNSLGYENILKSLVKNLKDIIKTKQSSKLNNDYSPI  
 NIKDFESIINNIPLIKSTRLINILALSIIAKELYTPIFEEMEENMFIKYLEAAIQNNI  
 KEDKILFENLTLKALEKYIKDFE"

gene complement(10583..14110)

CDS complement(10583..14110)  
 /locus\_tag="ECFEEEMN\_00034"  
 /inference="ab initio prediction:Prodigal:002006"  
 /inference="similar to AA sequence:RefSeq:CKG87105.1"  
 /note="Uncharacterized protein conserved in bacteria"  
 /codon\_start=1  
 /transl\_table=11  
 /product="hypothetical protein"  
 /protein\_id="Prokka:ECFEEEMN\_00034"  
 /translation="MFKKIFDFIKSRLFITAFLLCCIFLFSVLFWFWGPLVAFNDIYI  
 FSSFLRFSIISIIWLIVFLFLLKPIINFISLSEKRLKFKDLKKEADEFIYKSKR  
 NFFLSLKDAKETWKNLKTKNLPLIIIIIGNEGAGKSTFINYSDIEYPLSDSLESYKFF  
 HKSTRNFALYVSKKGALLDTEGNYFSQEEFFKPASSDEIPEDDIDKNRDFLIKKNTWK  
 KFLTFLNKNFFHSKLNGIILVDTVLFLLNPKEYSKNLIRYLTKRVNECEKTLNLKLP  
 IYIVFSKLDLMEGMKEYFDIFDKKISDKILGLSFDKILSEEFLLNNEFKELSDSLLCSL  
 MSKNSHIYNIENKNKSYLFLKQLDNLFALAKTFILEVQEENKLNNSYLRGIYFVSAY  
 QENIPRNFLLDAICEKYNCKKVLKSSIIYNKQSYFVKSLLEDLIFTDYALSTMKSYS  
 KKLSFLMILIIIGFGTYTISSYFISKNDKEFEKSQNTLRALQSLENQDYQNLNIKQK  
 ADFLIELRNILNTYPELWQDDNIFQYLNLNLSYKGFKEAKQLYKLNEDVLKNTLLKE  
 MEYTLTDTNKENLIKTLYLRSLEFQKYFNKEMLKIWINENWNTLSKYLISKDDFLG  
 GVDELKQFNLKSFTEDENSINIGKRKLESISRTQRIYTLNLFNSDKPKKEYLIKEDL  
 GFAANSVFSNNSQITSIDKIYTKVGMMSFLKDLNQQVDTAINIESWMLNSNFKENKNT  
 LTMGILKLYLNEYQNAWQNLASLQPVKYNTKEAMLNELDILSKRENPLYSLLKIVSS  
 NTNLDVALLTQAYNLGLNAGEIKSNFIGVSNAFTQYHKLNVKNLTLVSGNIEVGKGT  
 DDEKILDILNTNITNVSNKIIDFSSNNNQSAEEKIAYALGGNKDANDPFTAFQMSIKK  
 LPSDLERYYNQLSDHSWNLIIENYGISLFNTAWINEVYNPFINDIAPFYPFNEESTANL  
 SMDSFKTFFGRNGVLNSFYKYLNNVLVKKRNNYSINSQFASKLNFSKEFLDFITNAG  
 NLSSLILNANDNIRVNFTIQSLDLSADFSVVKLGYNNKNIQYDHTLDQTLQIVAEFFN  
 NGTSLNFTAYNYSNPNLNYTKSYKGEAWYKFIKDNKNNSTYSIMFNNKNLYDFFEI  
 INGAGDLNNIVYILNNLKIVENITGVNKQ"

gene 14243..14758  
 /locus\_tag="ECFEEEMN\_00035"

CDS 14243..14758  
 /locus\_tag="ECFEEEMN\_00035"  
 /inference="ab initio prediction:Prodigal:002006"  
 /inference="similar to AA sequence:RefSeq:AJK71137.1"

```

/codon_start=1
/transl_table=11
/product="major exported protein"
/protein_id="Prokka:ECFEEEMN_00035"
/translation="MAEPAFIRIEGSTQGLISSGASTEASIGNRYKSGHEDEIMAQEV
SHIVTVPVDQQSGQPSGQRVHKPFSFTCSLNKSVPLLYNALTKGERLPIVEVHWFRTA
TSGGSEHFFTTKLEDAIITNIELIMPNAQESSNHDKTELLKVSMSYRKVVWEHTAAGT
SGSDDWREGKA"
gene      complement(15310..17304)
          /locus_tag="ECFEEEMN_00036"
CDS       complement(15310..17304)
          /locus_tag="ECFEEEMN_00036"
          /inference="ab initio prediction:Prodigal:002006"
          /inference="similar to AA sequence:RefSeq:CKG88019.1"
          /codon_start=1
          /transl_table=11
          /product="hypothetical protein"
          /protein_id="Prokka:ECFEEEMN_00036"
          /translation="MEALNQKNSLNIRLLSSNNILLHNQEFKLYEIAQGNKSEIKTIF
TTNRIGEHLNASEIFSKEAQSFEILNQSSVYKNKPIYNHRFLLRSYEGHWCEIKF
ERKADKGSINSIRLKSKEFTLENNEKIVRNFYTFGDIVEFEAIYEDTKIKEEQIKWGY
VFIQDKNTLDKLNKNQLTNDKKESSLDEEILKDCFYIEKEEDKALLSSSIYRHLEN
NKAYCGKHLSQLPNPKDTQEQKALLVFAYKEIPNYNASYLIRINDYPQITIDCTLAE
TLRAHTNKDEISRLLGWGEVSYICQLWHDNPSDAKELKDLTFRSSTSQDFIDTIPNET
MKTIVKEILPRVEMQQLKTDNTPSRDKARFYAELDWDNFYMKFPIQELKGEYMNLLK
LFGESDFQKQFEDFLNDTLLDIKNIKNTQEYTMALNIQAMKENKTKNAEVFKLYKKE
ETLPETHKAIKDLQKPSDIIDNSLYFQRFDIKNDVFLPHLGLSKFDFASLQNSIQHEK
EVLDFHNSPKYKQNFALYSIAGAFNILYIPSLIQITRVTRFYNYHSLYAACKKVRAF
IIDTVNFNNGSDQPIGAWDYEKVGFDLYNSIMQYRNTKFHFKYTSPKSFLLPLYNSD
FLKTKQYFNLGLDFFLYSSTFLDMDFSHMQMQDTAFIVGK"

```

ORIGIN

```

1   cttgcactac agataaaggc tttgctttaa aagtaagctt tactccaagt aagtttaaat
61  ttgatcacag ctttgatcct gaggagggct taggagaaca aagtaaaaat caaatagagt
121 taaaagagcc tataataaga cttcattata aaagtgatag atttcaaaaa gataatttgc
181 ctatttataa tcttttaatc aataatgaaa aaaaagaaca agataaggct ttaatgaat
241 tcaatataga acaaaaagat ttaaaagata tagaggatat aaatatcttt aatcaattta
301 aacaagactt tagtaaagat catgaattta aagaattaaa tcttagcttc gatactaatt
361 taatcaagct ttatttcatt atcccaaaa acattgctaa agtttataaa agtgcttata
421 aagaatttaa aaacaaagat ctaggagcag ggtattttac acagctacat gaatatgata
481 aatcatttaa aaattcttta gaagataaga aagaattaaa cgaatatcat ttaacttttt
541 taactcctgc aaaaatgcaa aatttaaac ttcaaatcgc acaaggatta gataaaatct
601 tagaagatga agatagaaaa caagagcttt atgtttgtaa atttgtggtg gtaaatgggg
661 ttagcgaaaa caaaataaaa gcaaaaaata aagatgtaaa tatagataat gacacaaaga
721 atataaacac taaaaaagc aataatataa gttctagtga aagcaatgct caagaaaaaa
781 tcaactatct aagcaatgat ggtcaaaatc ttttaaaaaa tatagagaag ctaagactca
841 aaccttataa tgatcaaaat ggaaaagaga ttacttcata tgttaaaggt gcaactatcg
901 gatatggaca tcttataggg caaatgaat gggatttgta taaaaatggt attactttac
961 aagaagcgga taaattgttt aaaagcgatt tgttaccctt tgaaaatgct gtaaaaattc
1021 aataaactct tccttagcac agaacgaatt tgatgccttg gttatattat gttttaatat
1081 agggattgat aattttaaaa attcttctgt tgctaaaatc atcaatggag agaaaacggg
1141 ttacaaaaca ttaaaggaag cttggatggc gtggaacaaa agtcaaaata aagtaatgca
1201 gaggctaatt aataggagaa atgctgaata taagctttac actcaaggag gttatgaaaa
1261 atggtaattt ttaaaaatat attattgttt ttatttttta gtacttattt gttagcgcga
1321 gaggatttta ctccactaga gcaatgtacc tatgaaaatg aaaagttttg gataaaaatt

```



1381 ttaaactctat gtctagaggg taatataact tgtgataaaa ttgtatatgt aggtgtcaat  
1441 aaaaataatg gaaaatatat tgtcctaaat ggtaagtcta ttagtgatgt aaatatgaat  
1501 tttaaaggat atgtttttta aaatgggtatt tatgaatata atattttttaa taatttttta  
1561 tatatttcta aaaacaagca gattatacaa gaatatcgtc taaaattatg tgaaaaatag  
1621 acacaacaaa ggcaacaagt aacaacaat acctagaatg taaaaagtta aaaagatgca  
1681 ataagaatta caagaagttt ttaaagttat aaaaatccta ataatgaaa tcttagctcc  
1741 taaattttat aacaaatata aagattttaga agtagagatt gatgataggg gtaatatatt  
1801 aagatggata ggagagatta ataaagacaa aaaaatattag caaataaaaa atgatataat  
1861 aatgctttat ataaggaatc ttttatgttt ataagttcta aaacagagtt aattcaaact  
1921 attaaaaatt caacaatcaa caataaagaa gttaaacaga ttgattttat ttatccta  
1981 ttttctattt tacacgctat attaaaaaat attgattttc atcaaagaaa aatcctattt  
2041 aaaaatcaaa tattggctat ggaaatacta gaaattttta acaaaactcg tgataatcac  
2101 aataatatag aagtaaataat ccataccctt aatgagcttg atgctggaca aaatgtaaat  
2161 ttaaaagatt tatcaagcag tgaattttgc actaaagttt atttagaaga cttagaagaa  
2221 gaaattcaag ataagaaaca aggtaaagat tttaatcttt tttatcatac agataaaaaat  
2281 aatctttgta tcgaattttat taatacttta aaagaattag ccaaagattc tgaagatata  
2341 acaaccttg acgagttaat cgaaaacatc gatcctgatg atataagcag tgagaaattt  
2401 gatgatttta agaaaaaagt ttttagaaaag attggaaatg tcatagaatc ggattttttc  
2461 aaaaatagca taagtccac tttaaaaaat acttatgaaa aatttatcga tgagttgta  
2521 gaacacatta aaaaacttgc cgaagaaaaa gaatatgaaa aaattaaaat catactaagt  
2581 gctatagcgg gtgttgcaat agccacagtg gtagctgttc ttacaggtgg ggcaggacta  
2641 gctattttgg ctgctggttt attttcttta atgggttctg caagtgagta ttatgaattt  
2701 gctcaaagag attatggcac acttttaacg ctttagccg catttttagc cactagatgt  
2761 gctatgttta ttcattatat taattctcgc ttgttatctt gtgttttaat tattgataaa  
2821 aaagaaatta ttgatttaag tggttttgga ttatatcttg gaagtgatga aagcaatc  
2881 gttcaaatt tagcctataa aataaccta agcgaagaaa taaaaagcat cgaaaatatt  
2941 tttagtgaat tctttttaa cccagaacaa aaagacaatg agagtaaaaa tacagcta  
3001 gattcaaaat cgagcaattt actcgcctttc atttcaacgc aaaaattatc taatttgtat  
3061 ttaaaaaaca atgctatttt aaagaatttg caagaagata ttaaacaatt tatttatttt  
3121 tcttatatag aaagtccaaa ttttaactca agtaaactag ctgaattttt cgcacaaaaa  
3181 aatcaaaaca cacaaataga tttaaatata actaaaatga gtaaaaaatta tttgattatt  
3241 tcaaatatcc ccaataaata caatgcagga cttagtgaat gtttaactca agaaatcgcc  
3301 aactataata tacaagataa atacagaaca attaaaaaaa atattgatac ttcaaaaaaa  
3361 acttatgaca gcacaagaga ttatagcgaat tatagcatag aaataccaca agatgaaaat  
3421 gaaccttata ttttacaatt aagccctttt gtgaaaatat ccaaagaagc ttatgagaat  
3481 agtaaaaaag cttatgaaga tatgcaagag atttataaat atttacaata tttgttgct  
3541 acaccgcaga agctaccaga attcgcaaaa acagctaaag aaaaattagc aatatcagaa  
3601 aatgagtcaa tgatagaaat agtaaaaaag acggaaaatt tacgacattg cgaacgaata  
3661 aacatttttag cttatattga ctacaataaa aaaataaatg ataaaaaatg gcttccttat  
3721 ttttatatca aaaaattcct taacaaaaac gaagacaaag aatccatcat agaaaaagaa  
3781 aaaaaaatag ctcatcaata ttttaactttt ttgaaaaaag agctttttga aaaaatcgat  
3841 aatccttcat ttggaaacta ttctttatcg gataaatctt catttggaat ctattcttta  
3901 tcggataaat cttcatttgg aaactattct ttaatggaat gtttattttat ttcatttgtc  
3961 ttgtatcaag ctaagcttat ttttccaaat atcaatttgg atttgaaaaa atatggaggc  
4021 agtaattttg tataatataaa atacttagag gaaacttatg ttttatggac agatgaatat  
4081 ccaatatatg taataaatga gccaacaat attacagcat atgaagttgt atcgcaatta  
4141 ttaaaaaatac ttgacaaaaa agattattct tttgtggaaa atgatagttc gatcactata  
4201 gatgattttt ttaatgaatt atcaaaaagat ttagatgtaa caaatacatt agataaaaaa  
4261 ataatacaat tgaagcaaat gtatcattta gatgaacaaa aatgcattaa agaatttatg  
4321 aatttagacg aagaagcgca acgagctttt tttgtgtgga tggatataga gaaacaaata  
4381 tcagatttat caaagctttt ggaacagatg tatggaaaag aatatttttaa taaggcaaaa  
4441 gaacaaaaaa caagtgaat atttacttat gcaatgttaa aaattttatt aagcgttagt  
4501 ctttttatca gctttacgc tcaaatgttg tgggatttta atttttttaa aacaatagaa  
4561 tatgttattc aagcttgtat taaaataaac aaagaaggat ttaagaat ttttaagaa

4621 cagcttggtgta tttttacacc tctaaaaaag aatagttatat atcatataca cataaaatct  
4681 aatttaataa taaaagcgtg cttgcaacaa atagaaaaag aattaactca tactaaaaatc  
4741 caaatgattt tagcacaaga gataaaatcc aatttaataa tacaaaaaaa tacatccgat  
4801 ttaaattctat ttatcacaaa gataaaagaa tactttaatg aaaaacaaat taagattttat  
4861 tggagtgata aatatatgaa acaattatth atatactcca atcaagaaag caatatatct  
4921 aaaattgctc ttatgcatag catagatata caaactcaaa aatatactat ttatacttat  
4981 gctaagctaa ataaacttga ccttgcttct attgtggctg gagaatttgt gggatttttt  
5041 ttaaattatc tctttccaac aaattataaa gccctgcaag aacaatatga aagcattggtt  
5101 tatcagcttt acacctttaa agatgattct cctttggcgg ttataagaga tcattttata  
5161 acttatcctt ttgcaatcaa ttcaaaattc attagctttg atttaaagaa aattttttat  
5221 ggcatagatc tttgcacagg agtttttgac actcattttt cttttcatta tgaaatagat  
5281 caaaagcttg aagaaaataa agaatttctt ttaaaaagac ttttgtctta tttgattatt  
5341 gatgagaaaa gaagtgcac tgcttttagag gatataaaag aacaaaaata tattatagat  
5401 gattatactt tttatttcaa agagttaaaa tcttttagagc ttaaaaaatg cactatatat  
5461 caactccctt gtaatcattc tttgtttaaa gagtttagaa ataaagaaaa gcaaatagat  
5521 gcttttaaaa aggatgaaga tagtcccatc catgcttata atgaagcttt acaaatttta  
5581 caagattttg ctaatggact ttatattgtc aaatatgaag aaggaaaatg tatagaagat  
5641 aaaaataaaa ccagaagatt actagaaaaa ctcaatatca taggacaaaa caatcttaaa  
5701 gctatgtata tggggataaa tggaaataaa gaaagcttga aagccatagg aaaaagagaa  
5761 aataacacta gcaaagcaaa tataaatgct gatattgtat cagaacaaa agctccgcct  
5821 aacttcatag gtagactagc cactactata atcatagaag atggtttata tataggttaa  
5881 attaagaaa gataaatagt gagcgaaact tatgagattt atacacccaa tggattaaca  
5941 tttagatgtg aaaaagatac caataaaata ctattttaaag aaaatattaa acccacaggc  
6001 aattataccg aagaatattc caaagcggtt tttaaatctt atttatattat gaaaaactcc  
6061 ccctacaaag actataaacc aatataatct gatcctaact tttatacagg agagaaatcc  
6121 actttacttg aatttaaaga atggcaaaac atttatttaa aagatcctat aaaaggaagc  
6181 atagctcctt ggactaaagc agaaaaagct tattataaat ctttaaaaaac taaaagagaa  
6241 agatgtaagt atttggcaat aagaagtgga ttaagatctg tggttataga tataccctat  
6301 gatgcttatt gtaatgtaga tgaaaaagga tatttaataca atgaagaata cgcctatatt  
6361 tatgatgaag taagtctca tcgtggaaca ttaaaatctt attctttctt taatgaatgg  
6421 gaattagctg ctttacttct aggagatatg agagctagtc ctacagccgc tgtaggattt  
6481 aaagcaagac aacaacaagc tttattttta caagctcaat ttggagataa aaatgctttt  
6541 aagagtttag gtttagcagt attgtgttct aattcttttc ttacagggca acattggaat  
6601 aagcttagag caaaaatgat ttacgattta cacgatcatc attatgagag tttgttagat  
6661 gaatttggtg tgctaccctt ttttagatgag attataggag cagattggac gattgattta  
6721 aataaatatg attttgccta tgatgaagaa ggtagaatca tttgggcttt atataatgat  
6781 attgaaaaag gcaaattaaa agatccaaga gatgtggatt ctactcctga aagtagaaat  
6841 gaatttgatg atgctatgga tagatacga aatggaatgg taactagatt tgatgtagat  
6901 actccaaatg aatggagtga acaacaagct gctttagata gagatacttt agtattaagt  
6961 gccaaactcg cagccctcac tcctccacaa ggctatccta atgcccctta ttattttaca  
7021 cctgaaagat tagaatggat ttataaaaga ggatatttag ataaactcct tgatccaaga  
7081 attcctgcta tttatagata taatttcca agggaactta gagctaagat actcaaatth  
7141 gctgaagaaa atggcattaa agaataaagt aattgcatag gcagactagc cactactata  
7201 atcatagaag atggtttata catgggataa atttaagaaa ggataaataa tgagcgaac  
7261 ttatgagatt tatacacca atggattaac attagatgtg gaaaaagata ccaataaaat  
7321 actatthaaa gaaaatatta aaccacagg caattatact caagaatatt ccaaagcggg  
7381 ttttaaatct tattatatta tgaaaaactc cccctacaaa gactataaac caatatatct  
7441 agatcctaac ttttatacag ggcaaaaatc cactctagta gaatttaaag aatggcaag  
7501 catatattta aaagatccta tcaaagtagc tcaaaatatt acaaatattt gtattaatta  
7561 tgtaaaaaaa ggttttaag aagttttaat cgaacaactt ggcattatat atttattaac  
7621 acatccacaa atcgaagttg aagttaagaa atatgaaaa aatattttta agactataaa  
7681 caaggaaatt gctgcaaaaa gattttctac aattaaagaa gaattatttt tcaataaaac  
7741 aaaaatatcc tttatggcag aacaagtaaa aaacggtatt gattatgaaa tagatcaaaa  
7801 gcttgaagaa aataaagaat ttcttttaaa aagacttttg tcttatttga ttattgatga

7861 gaaaagaagt gcaactgctt tagaggatat aaaagaacaa aatatatta tagatgatta  
7921 tactttttat ttcaaagagt taaaatcttt agagcttaaa aatgcacta tatatcaact  
7981 cccttgtaat cattctttgt ttaaagagtt tagaaataaa gaaaagcaaa ttagtgcttt  
8041 taaaaaggat gaagatagtc ccatccatgc ttataatgaa gctttacaaa ttttacaaaga  
8101 ttttgctaata ggactttata ttgtcaaata tgaagaagga aatgtatag aagataaaaa  
8161 taaaaccaga agattactag aaaaactcaa tatcatagga caaaacaatc ttaaagctat  
8221 gtatatgggg ataaatggaa ataaagaaag cttgaaagcc ataggaaaaa gagaaaataa  
8281 cactagcaaa gcaaatataa atgctgatat tgtatcagaa acaaaagctc cgcctaactt  
8341 cataggtaga ctagccacta ctataatcat agaagatggt ttatatatag gttaaattaa  
8401 gaaaggataa atagtgagcg aaacttatga gatttataca cccaatggat taacattaga  
8461 tgtggaaaaa gataccaata aaatactatt taaagaaaat attaaacca caggcaatta  
8521 taccgaagaa tattccaaag cggtttttaa atcttattat attatgaaaa actcccccta  
8581 caaagactat aaaccaatat atctagatcc taacttttat acaggagaga aatccacttt  
8641 acttgaatth aaagaatggc aaaacattta tttaaaagat cctataaaaag gaagcatagc  
8701 tccttggact aaagcagaaa aagcttatta taaatcttta aaaactaaaa gagaaagatg  
8761 taagtatttg gcaataagaa gtggattaag atctgtggtt atagatatac cctatgatgc  
8821 ttattgtaat gtagatgaaa aaggatattt aatcaatgaa gaatagcct atatttatga  
8881 tgaagtaagt tctcatcgtg gaacattaaa atcttattct tcttttaatg aatgggaatt  
8941 agctgcttta cttctaggag atatgagagc tagtcctaca gccgctgtag gatttaaagc  
9001 aagacaacaa caagctttat ttttacaagc tcaatttggg gataaaaatg cttttaagag  
9061 tttaggttta gcagtattgt gttctaattc ttttcttaca gggcaacatt ggaataagct  
9121 tagagcaaaa atgatttacg atttacacga tcatcattat gagagtttgt tagatgaatt  
9181 tggatgcta ctttttttag atgagattat aggagcagat tggacgattg atttaaataa  
9241 atatgatttt gcctatgatg aagaaggtag aatcatttgg gctttatata atgatattga  
9301 aaaaggcaaa ttaaaagatc caagagatgt ggattctact cctgaaagta gaaatgaatt  
9361 tgatgatgct atggatagat acgaaaatgg aatggtaact agatttgatg tagatactcc  
9421 aatgaatgg agtgaacaac aagctgcttt agatagagat acttttagtat taagtgccaa  
9481 actcgagcc ctcactcctc cacaaggcta tcctaagcc ctttattatt ttacacctga  
9541 aagattagaa tggatttata aaagaggata tttagataaa ctcttgatc caagaattcc  
9601 tgctatttat agatataatt tcccaggga acttagagct aagatactca aatttgctga  
9661 agaaaatggc attaaagatt aaagaatcac tcaaaatctt taatatactt ttccaatgct  
9721 tttagggtta gattctcaaa aagaatctta tcttctttga tattgttttg tatggcagct  
9781 tcaagatatt taataaacat attttcttcc attttctcaa agatgggagt gtataattct  
9841 tttgcgatta ggctaagggc taaaatattg atcaatcttg tggatttgat taaaggata  
9901 ttattaataa tactttcaaa atcttttaatg ttgataggag aataatcatt atttaattta  
9961 gagctttggt gttttgtttt aatatctttt aaatttttta ccaaactttt tagaatattt  
10021 tcatacccta atgaatttgg atctctttga atgatttctt ttaaaaagct atcatctgcc  
10081 ttttcttct cgataaacct ataattatta ttttttaaaa tctctttcaa ctcttcattt  
10141 ttgtcaaaat ttatacttgt ttttcttcta ggttcaattt caatttcac aaatgattg  
10201 cgtttttcaa tatcttctaa gtatttttta ttttctttga tactttctc aatgcttttt  
10261 gcatccacaa atctaaattc taaattaccg attttaaaaa tatcgcctat gctaattatt  
10321 atttcatagc cacttggcat tctagaaaag gacttgttat aataaatgct agaatcttca  
10381 aaagctgcaa ttgtaaaaga tccttcttca taagatacta tggcatgggt atttttgatt  
10441 tgttctagtt tatcttgaat acgaaaagt caatcatcac cacttcctat agttccacc  
10501 tttgtatcaa atacaaatgc tttagaacca ctaatgcatt cgtcataatt ctcaatagca  
10561 attcctaatt tttctttttc tatcattggt tatttactcc tgtgatattt tctactattt  
10621 taagattatt taaaatataa actatattat ttaaactgcc agcacggtta ataatttcaa  
10681 agtcaaaata taagttttta ttattattaa acataatgct gtatgtagaa ttgtttttat  
10741 tatcttttat aaacttatac catgccatt ctcccttata tgattttgta taatttaaat  
10801 taggattgga gtagttgtag gctgtaaaat ttaaacttgt tccattattg aattcttctg  
10861 ctacaatttg tagggtttga tcaagagtat gatcgtattg aatattttta ttgtttagc  
10921 caagctttac aaaggaaaaa tctgcactta aatcaaggct ttgaatagta aaattaactc  
10981 ttatattatc attagcattc agtatgagac ttgagagatt gcctgcattg gtgataaaat  
11041 ctaaaaattc tttagagaaa ttttaattttg aagcaaattg ggaattaata gaatagttat

11101 tttttctttt tactaaaaca ttattcaagt attttttata aaaactatftt aatactccat  
11161 ttctgccaaa aaatgtttta aagctatcca tactcagatt agctgtgctt tcttcattaa  
11221 aaggataaaa tggcgcaata tcattgataa atggattgta tacttcgfta atccaagcag  
11281 tattaataaa tgaataacca tagttctcaa tcaaatcca agaatgatca gaaagctgat  
11341 tgtaatacct ttctaaatca ctaggtaatt tttttatact catttgaaat gcagtaaaag  
11401 gatcattggc atctttattg ccaccaagag catatgcat tttttcttcg gcgctttggf  
11461 tattattgga gctaaaatct ataattttat tggacacatt tgtaatattt gtattaagaa  
11521 tatctaatat tttttcatca tcagtgcctt tgcctacttc tatattgcca acacttaaaa  
11581 gtgtattttt gtttacaagc ttatgatatt gcgtaaaagc attacttact ccaataaagt  
11641 ttgatttaat ttctccagca tttaatccta aattgtaggc ttgagtcagt aaaaccgcat  
11701 catttaaatt tgtattagaa ctaacaattt ttaataaaga atataaaggg ttttctcttt  
11761 ttgataagat atcaagctca ttaagcattg cctctttggf attatactta acaggctgca  
11821 atgaagcag tagattttgc caagcatttt ggtattcatt taaatatagt tttaaaatac  
11881 ccatagtcaa agtattttta ttttctttaa aattgctatt taacatcaa gattcaatat  
11941 tgattgagggt gtcaacttgt tgatttaagt cttttaaaaa gctcatcata ccaacttttg  
12001 tatataattt atctatagaa gttatttgag aattatttga aaatacacta tttgcagcaa  
12061 agcctaaatc ctctttgata agatattttt ctttaggttt atcactattt aaaaaattaa  
12121 gaagagtgta aattctttga gttctactta tgctctcaag ttttcttttt cctatattta  
12181 tactgttttc atcttctgta aaggatttaa gattaaattg ttttaagttca tccacacctc  
12241 ctagaaagtc atctttagag attaaatact tgcttaaagt attccaattc tcgttaatcc  
12301 aaatttttag catttctttg ttaaagtatt tttgctcaaa caaagatcta tataaatata  
12361 aggttttgat taaattttct ttatttgtgt cggtaaagtaa agtatactcc atttctttta  
12421 ataaagtatt ttttaacaca tcttcattca gtttataata aagttgttta gcttctttaa  
12481 atcctttgta tgagagatta aggtttaaat attgaaatat attatcatct tgccaaagtt  
12541 caggataagt atttaaaata tttctcaatt caattaaaaa gtcggctttt tgtttgatat  
12601 ttaaattttg ataatcttga ttttcaagaa gtgattgtaa agctcttaaa gtgttttggc  
12661 ttttttcaaa ttctttatcg tttttactta taaaatagga agatatagta tatgttccaa  
12721 agcctatgat taaaatcata attaaaaaag ataatttttt ggaataagat tcatagtagc  
12781 ttaaagcata atctgtaaaa attaaatctt caagtagtga ttttaacaaaa taactttgft  
12841 tattatatat aatactagat tttgataata cttttttaca gttgtatttt tcacatatgg  
12901 catcgagcaa gaaatttcta ggaatatttt cttgataagc actaacaaaa taaattcccc  
12961 taagataaga attattttta agcttgtttt cttcttgcac ttccaaaata aatgtttttg  
13021 ccaatgcaaa taaattatca agttgtttta aaaataagta gctttttattt ttattttcta  
13081 tattgtaaat atgggaattt ttactcatta aagagcataa taatgaatca ctttaattctt  
13141 taaattcatt atttaaaaat tcttcaactta agattttatc aaaagataat cctaaaattt  
13201 tatccgaaat ttttttatcg aaaatatcaa aatactcttt catgccttcc atcaagtcaa  
13261 gttttgaaaa aactatatag ataggcaact ttaaattcaa agttttttca cattcgftta  
13321 ctctttttgt tagatatcta ataagatttt tggaaatact cttaggatta ttttaagaaaa  
13381 ggacagtatc aacaactaaa ataattccat ttagtttgct atgaaaaaaa tttttattga  
13441 ggaaagtaag gaattttttc catgtatttt ttttaattaa aaaatctcta tttttatcta  
13501 tatcatcttc gggatatttc tgcctacttg caggtttaaa aaattcttct tgtgagaaat  
13561 agtttccttc tgtatctagc aaagcacctt tttttgatac ataaagcgcga aaatttctag  
13621 tagacttatg gaattttttta taagactcta aactatcgct aagcggatat tcgatgtcag  
13681 aataattaat aaaagtgcct tttccagccc cttcgtttcc tatgatgata attaagggtta  
13741 aattttttgt ttttaaatca ttcttccatg tttctttggc atctttaaga gataaaaaga  
13801 agtttctttt agatttgtaa atgaactcat cagcttcttt ttttaggtct ttaaatttta  
13861 atcttttttc gcttttttaa gaagatataa aatttataat aggctttaat aaaaaaaca  
13921 aaaaaacaat aagccaaatt atcgagataa tgctaaatct taaaaatgaa ctactaaaaa  
13981 tatatataatc attaaaagct actaaaggac cccaaaacca aaataaaaca ctaaaaagaa  
14041 aaatacaaca aagtaaaaaa gcagttataa ataatcttga ttttaataaaa tcaaatattt  
14101 ttttaaacat cattattcct taattaaagt aaaaacaaat aaatattaat atcaatatac  
14161 aaatatttta taaaaattta atagattaag attaaaatga tacaattttg aatgttaaaa  
14221 aaaattaaag gaggttcttt ttatggctga accagcgttt ataagaattg aaggttccac  
14281 acaaggtttg atttcaagcg gtgcatctac tgaagcaggt attggcaata gatataaatc

14341 aggtcatgaa gatgaaatca tggctcaaga ggtatctcat atcgtaactg taccggttga  
14401 tcagcaaagt ggacaacctt ctggacaaag agttcataag cctttttctt ttacttgctc  
14461 attaaataag tccgtacctt tgctatataa tgcacttacc aaaggagaaa gacttccaat  
14521 agtcgagggt cattggttta gaactgcaac aagtggcgga tctgaacatt tttttactac  
14581 aaaattggaa gatgcaatta ttacaaatat tgaattaata atgccaaatg cacaagagtc  
14641 aagtaatcat gataaaactg agctttttaa agtttcaatg agctatagaa aagtagtttg  
14701 ggaacatact gctgctggaa ctagcggaag tgatgattgg agagagggta aagcttaatt  
14761 ataatttatc ttaaataatc ccgactaaaa tacataatta tagtcgggggt tgmtatctta  
14821 aaatatatct tgtttttctt ggtttgaatt acaaaattac tttctaaatt ataatactat  
14881 tattcatata taaaatcatt tgtcttaacg agcaatcttt gtcttctatg cctagatact  
14941 atgtttttta tctgtgtttt ctaagccctt taactctttt ttaagatcat tatcggcaaa  
15001 tattgtaata tttctatcag gatagagggt atttaacttt tttactacac tttctaaatt  
15061 accagcatct actgctataa taatagggtt atttaaggct ttatataatg tagcaccagt  
15121 agcaaaacc tcgcaaatat aaaattcttt taaattatgc agtgtttttag ctctattat  
15181 atgaaagcaa ctttttgagg cttatattta tacaataaaa gcgtcagaca ataaaggggt  
15241 agaaaatagt atgcaataag actaaacca tatataaaag gctcataatc accaccagca  
15301 aaaaacatct tacttcccca ctataaaagc agtatcttgc atttgcatat gactaaaatc  
15361 catatccaaa aatgtagagc tatataaaaa gaaatctaag cctagattaa aatactgttt  
15421 tgtttttaga aagtctgaat tatataaggg aaataagaat gattttgggtg aggtatattt  
15481 aaaatgaaat tttgtatttc ggtattgcat tatcgaatta tataaatcaa atcctacctt  
15541 ctcataatcc catgccccaa taggctgcat gctaccatta ttattaaaat tcacagtatc  
15601 aatgataaaa gcacgcacct ttttgcacgc agcatataaa gaatggtaat tatagaatct  
15661 tgtaactctc gtgatttgta taaggcttgg tatatataag atattaaaag cccctgcgat  
15721 agagtataga gcaaaattct gcttgtattt tgggtagag tggaatttat ctaaaacttc  
15781 ttttcatgt tgtagggagt tttgcaatga aaatgcatca aatttactta agcctaaatg  
15841 cggtaaaaac acatcatttt ttatatcaa ctttgaaaa tataaactat tatcgataat  
15901 atctgatgggt ttttgaagt cttttatagc tttatgagtt tctgggagtg tttcctcttt  
15961 tttatatagc ttaaagactt ctgcattctt cgtcttattc tctttcattg cttggatatt  
16021 gagtgccatt gtatattctt gtgtattttt aatgtttttt atatctagta aagtatcatt  
16081 aagaaaatct tcgaattggt tttgaaaatc agattcttct ccaaaaagct ttttgagatt  
16141 catatactcg cccttttagct cttgcattat ggggaacttc atgtaaaaat tatccaatc  
16201 taattccgca taaaatcttg ctttatctct tgattttgtg ttgtcagctt ttaattgttg  
16261 catcttact ctaggcaata tctcctttac tattgttttc attgtttcat tagggatagt  
16321 atctataaaa tcttgcaag tagagcttct aaaggttaaa tcttttaatt ctttagcatc  
16381 acttgatta tcatgccata atctttgaca gatatagctt acctcccc aaccaagcct  
16441 tgagatttca tctttgtttg tatgtgccct tagtgtttct gctagagtgc aatcaatggg  
16501 aatttggtga taatcattaa ttcttataag ataaggagca ttataattgg gtatttcttt  
16561 ataagcaaag actaatagcg ctttttgctc ttgtgtgtct ttagggtttg gtagttgcaa  
16621 actaagatgt tttccacaat aagctttggt gttttctaaa tgtctataaa tgatagaaga  
16681 agataatagg gctttatctt cttctttttc aatataaaaa caatctttta aaatttcttc  
16741 atcaagcaaa gaactttcct ttttgtcatt agttaattgg tttttgttta acttatctaa  
16801 ggtgttttta tcctgaataa aaacataacc ccatthaatt tgctcttctt tgatttttgt  
16861 atcctcataa atagcttcaa attctactat atcaccaaaa gtatagaat tacgcactat  
16921 tttttcatta ttttctaagg taaattcttt ggatttttagc ctaatagagt ttatagaacc  
16981 tttatctgcc tttctttcaa attttatttc acaccaatgc ccatactcat aacttcttaa  
17041 taaaaatcta tgattataga taggtttggt tttataaaca ctagattggg ttaaaattaa  
17101 ttcaaagctt tgtgcttctt tactaaaaat ttcactagca tttaaatgag cttctctat  
17161 tctattagtt gtaaaaatag tcttgatttc acttttattg ccctgtgcta tttcataaag  
17221 cttaaattct tgattatgca gaagaatatt attagagctt aaaagcctaa tatttaaaact  
17281 atttttttga ttgagtgcct ccattactct gccttaagct ctccaccttt aaccacaagt  
17341 ccattagagt ctataatcac ttctactcca cctgctttta tgataacaca atctttctta  
17401 gtaacaattt gagtatcacc tacttgatgg aggatttgat tgccctgctt tacttcacaa  
17461 tctgtttgaa agtcaaaagt agaattttct gattctaaag aatattgctc ttctatcttt  
17521 gtttgca

```

//
LOCUS      ECFEEEMN_3                4060 bp    DNA        linear        12-APR-2021
DEFINITION Campylobacter species strain strain.
ACCESSION
VERSION
KEYWORDS   .
SOURCE     Campylobacter species
  ORGANISM Campylobacter species
            Unclassified.
COMMENT    Annotated using prokka 1.14.6 from
            https://github.com/tseemann/prokka.
FEATURES   Location/Qualifiers
  source   1..4060
            /organism="Campylobacter species"
            /mol_type="genomic DNA"
            /strain="strain"
  gene     complement(619..771)
            /locus_tag="ECFEEEMN_00037"
  CDS     complement(619..771)
            /locus_tag="ECFEEEMN_00037"
            /inference="ab initio prediction:Prodigal:002006"
            /codon_start=1
            /transl_table=11
            /product="hypothetical protein"
            /protein_id="Prokka:ECFEEEMN_00037"
            /translation="MNENIYGSLEFYSKETQSTPSDKRDLGVFGDVAPYALGITEGFA
            TKAFKG"
  gene     complement(764..1408)
            /locus_tag="ECFEEEMN_00038"
  CDS     complement(764..1408)
            /locus_tag="ECFEEEMN_00038"
            /inference="ab initio prediction:Prodigal:002006"
            /codon_start=1
            /transl_table=11
            /product="hypothetical protein"
            /protein_id="Prokka:ECFEEEMN_00038"
            /translation="MSEINNTEIKEQDTQDEIIWEGKKDIPSFLLYWIANIVFLCFI
            LYLPRLFNPSKEIDYKWFIVFVIFLFLGLYILVKNIYQMANIKRIYITKEKLVIEYYI
            KNDLVFPLGTFVYYRSSLPSISNPGDIVIYTFGDKVKEYLEPGLFSDGDDPTKGC
            ERINAIKPHVMPYLLSLSDDEEFKIISHVSGYNEIGTTFLEAMELRKEKKDE"
  gene     complement(1401..2018)
            /locus_tag="ECFEEEMN_00039"
  CDS     complement(1401..2018)
            /locus_tag="ECFEEEMN_00039"
            /inference="ab initio prediction:Prodigal:002006"
            /codon_start=1
            /transl_table=11
            /product="hypothetical protein"
            /protein_id="Prokka:ECFEEEMN_00039"
            /translation="MNSTLPWKSkrkfyflailqyiyilalglfvcwfcwfvllkes
            LWYGFFAFGSLYYVfELHRALNFKSIILTEQGLILKMRWFDTEIFYPYGSFTMSYDIA
            YGIRFFERIEIQNIKHIRKEFIFPCGVDSFGSFENNHTFKELCTKYTQKALETMNLEE
            KVNLYKLYRANIKIFFNQEIDHNVFIIDFSPYIQEIKLNLKDKNE"
  gene     complement(2022..2174)

```

CDS /locus\_tag="ECFEEEMN\_00040"  
 complement(2022..2174)  
 /locus\_tag="ECFEEEMN\_00040"  
 /inference="ab initio prediction:Prodigal:002006"  
 /codon\_start=1  
 /transl\_table=11  
 /product="hypothetical protein"  
 /protein\_id="Prokka:ECFEEEMN\_00040"  
 /translation="MNENIYGSLELYSKETQSTPSDKRDLGVFGDVAPYALGITEGFA  
 TKAFKG"  
 gene complement(2167..2805)  
 CDS /locus\_tag="ECFEEEMN\_00041"  
 complement(2167..2805)  
 /locus\_tag="ECFEEEMN\_00041"  
 /inference="ab initio prediction:Prodigal:002006"  
 /codon\_start=1  
 /transl\_table=11  
 /product="hypothetical protein"  
 /protein\_id="Prokka:ECFEEEMN\_00041"  
 /translation="MSEINNTEIKEQDTQDEIIWEGKKHIPSFLFWITYIVLLCFA  
 LYLPRLFNPSKEIDYKWFIVFFTFLLGIYAFARAIYKMANIKRIYITKEKLVIEYYI  
 KNDLVFPLGTFIYYRQISYSPSPGHIVIHTFGDKAKEYLEPGLFSDGDDPTKGCCEK  
 INAIKPHVMPYLLSLSDEEFEKIFFHVNATSEIDTTFLKEAMELRKEKKDE"  
 gene complement(2856..3488)  
 CDS /locus\_tag="ECFEEEMN\_00042"  
 complement(2856..3488)  
 /locus\_tag="ECFEEEMN\_00042"  
 /inference="ab initio prediction:Prodigal:002006"  
 /codon\_start=1  
 /transl\_table=11  
 /product="hypothetical protein"  
 /protein\_id="Prokka:ECFEEEMN\_00042"  
 /translation="MSQTNNTEIKEQDTQDEIIWEGKKHIPSFLLYWITYIVLLCFM  
 LYLLPRAFDNTKNFKWVVFIMFLVTVYALAQEIIYKAANIKRIYITKEKLVIEYYIKN  
 DLVFPGLTFFVYYRHVSFVLTPGDIVIYTFGDKVKEYLEPGLFSDGDDPTKDCFERIN  
 AIIKPHVMPYLLSLSDEEFEKIISHVSGFSEIGTTFLKEAMELRKEKKDE"  
 gene complement(3539..4039)  
 CDS /locus\_tag="ECFEEEMN\_00043"  
 complement(3539..4039)  
 /locus\_tag="ECFEEEMN\_00043"  
 /inference="ab initio prediction:Prodigal:002006"  
 /codon\_start=1  
 /transl\_table=11  
 /product="hypothetical protein"  
 /protein\_id="Prokka:ECFEEEMN\_00043"  
 /translation="MFPRLFNPSKEIDYKWFIVFFTFLLVIYALAQKIYRMANIKRIY  
 ITKEKLVIEYYIKNDLVFPLGTFVYYRRLSFVLTPGHIVIYTFGDKVKEYLEPGLFS  
 DGDDPTKDCFERINAIKPHVMPYLLSLSDEEFEKIIFHVSFSEIDTTFLKEAMELR  
 KEKKDE"

ORIGIN

```

1 ctcattttta tcctttaaat aagttttaat ctcttgata taaggggaga aatcaataat
61 aaaaacattg tgatctatct cttgattaaa aaatatttct atatttgctt gataaagctt
121 ataaagattt actttttctt ctaaattcat agtttctaaa gctttttgtg tatatttggt
181 gcataattct ttaaattgtg gattgttttc aaaactacca aaagattcaa aaccattaag
  
```

241 taatttaaaa tttttaatat tagtatttga taaaaaactt atagtttcat caaatttaat  
301 aaattgtatg gttatagatt ttatagtaaa acttccataa ggatagaaaa tttccgtatc  
361 aaaccaccgc atttttaatg ttaatccttg ctctgttaaa attatagatt taaaatttaa  
421 tgtttcatac aattcagaaa tataaaaaaa tgtaagaaat atagctaata aactatacca  
481 caaagattct ttaagtaaaa caaaccaaca aaaccaacac agaaaaaaag ctaatataaa  
541 ataaagagag caaaaaaaca aactaaaagg aataatTTTT ctcttacttt tccaaagtaa  
601 agtagaatta ttcattgctt accccttaaa agcttttagta gcaaaacctt ctgtaatgcc  
661 taaggcataa ggagcaacat ctccaaatac tcctaaatcc cttttatcac taggagtgct  
721 ttgagtttct ttagaataaa actctaaact tccataaata ttttcattca tcttttttct  
781 cttttctgag ttccattgct tctttaagga aagtgggtacc aatttcgtta taaccgctta  
841 catgtgaaat gattttttca aattcctcat cacttaagct taataaataa ggcattacat  
901 gaggttttat aatggcatta attccttcaa aacaacctt tgttggatca tcgccatcac  
961 tgaataaacc aggttcaagg tattccttga ccttatctcc aaaggtgtat atcactatat  
1021 ctctgggatt tgatatggat ggaagtgcg aactacgata atatacaaaa aaagttccta  
1081 aaggaaaaac caaatcattt ttaatataat actcaatcac aagtttttct tttgtgatat  
1141 aaattctttt aatatttgcc atttgataga ttttttttac aagtatatat aacccaaaaa  
1201 gaaatataac aaaaactata aaccatttat aatctatttc tttgctagga ttaaataatc  
1261 taggaacaaa ataaagaata aaacataaaa atacaatatt tgctatccaa taaagcaaaa  
1321 acgaaggat atcctttttt ccttccaaa tgatttcac ttgggtgtct tgctctttga  
1381 tttctgtgtt attgtttatt tcaactattt ttatccttta aattaagttt aatctcttgt  
1441 atataagggg agaaatcaat aataaaaaaca ttgtgatcta tttcttgatt aaaaaatatt  
1501 tttatatttg ccctataaag cttataaaga tttacttttt cttctaaatt catagtctct  
1561 aaagcttttt gtgtatattt ggtgcataat tctttaaatg tatgattgtt ttcaaaacta  
1621 ccaaaagaat ccacaccgca aggaaaaata aattcctttc ttatgtgttt tatattttgt  
1681 atttctattc tttcaaaaaa tcttatccca taggcaatgt cataactcat tgtaaaactt  
1741 ccataaggat agaaaatttc tgtatcaaac caccgcattt ttaatattaa tccctgctct  
1801 gttaaaatta tggatttaaa attcaatgcc ctatgtaatt caaaaacata ataaagactc  
1861 ccaaaggcaa aaaaaccata ccacaaagat tctttaagca aaacaaacca acaaaacca  
1921 cacacaaaaa gacctaatgc aagataaata atatatgca aaatagcaag gaagtaaaat  
1981 tttctcttgc ttttccaagg taaagtagaa ttattcattg cttaccctt aaaagcttta  
2041 gtagcaaaac cttctgtaat gcctaaggca taaggagcaa catctccaaa tactcctaaa  
2101 tcccttttat cactaggagt gctttgagtt tctttagaat aaagctctaa acttccataa  
2161 atattttcat tcatcttttt tctcttttct gagttccatt gcttctttaa ggaaagtagt  
2221 atcaatttca ctagtagcgt ttacatggaa aaagattttt tcaaattctt catcacttaa  
2281 gcttaataaa taaggcatta catgaggttt tataatggca ttaatttttt cacaacaacc  
2341 tttgtttgga tcatcgccat cactgaataa accaggttca aggtattctt tggccttatc  
2401 tccaaaggta tgtatcacta tatgtcctgg agaaggtgaa tatgaaattt gacgataata  
2461 tataaaaaaa gttcctaaag gaaaaacca atcatttttg atataatact caatcacaag  
2521 tttttctttt gtgatataaa ttcttttaat atttgccatt ttatagatcg ctctgtcaaa  
2581 tgcatatatg ctaaaaagaa atgtaaaaaa aactataaac catttataat ctatttcttt  
2641 gctaggatta aataatctag gaaacaataa aagcgcaaaa cataaaagca caatatatgt  
2701 tatccaaaaa agcaaaaacg aaggtatatg cttttttcct tcccaaatga tttcatcttg  
2761 ggtgtcttgc tctttgattt ctgtgttatt gtttatttca ctcattttta tcttttaaat  
2821 aagttttaat ctcttgata taaaataaaa tattttcatt catctttttt ctcttttctg  
2881 agttccattg cttctttaag gaaagtggta ccaatttcgc taaaaccgct tacatgcgaa  
2941 atgatttttt caaattcttc atcacttaag cttataaat aaggcattac atgaggtttt  
3001 ataatggcat taattctttc aaaacaatct tttgttggat catcgccatc actgaataaa  
3061 ccaggttcaa ggtattcttt gactttatct ccgaaggtgt atatcactat atctcctgga  
3121 gtaagcacia atgacacgtg acgataatac acaaaaaaag ttcctaaagg aaaaacaaa  
3181 tcatttttga tataatactc aatcacaagt ttttcttttg tgatataaat tcttttaata  
3241 tttgccgctt tatagatctc ttgtgcaagt gcatataccg ttacaagaaa cataataaaa  
3301 accacaaacc atttaaaatt cttagtattg tcaaatgcc taggaagcaa ataaagcata  
3361 aaacataaaa gcacaatata tgttatccaa taaagcaaaa acgaaggtat atgctttttt  
3421 ctttccaaa tgatttcac ttgggtgtct tgctctttga tttctgtgtt attgtttgtt



3481 tggctcattt ttatccttta aacaagtttt aatctcttgt atataaaata aaatattttc  
3541 attcatcttt tttctctttt ctgagttcca ttgcttcttt aaggaaagta gtatcaattt  
3601 cgctaaaacc gcttacatgg aaaatgattt tttcaaattc ttcatacactt aagcttaata  
3661 aataaggcat tacatgaggt tttataatgg cattaattct ttcaaaaaca tcttttgttg  
3721 gatcatcgcc atcactgaat aaaccagggt caaggattc tttgacttta tctccgaagg  
3781 tgtatatcac tatatgtcct ggagtaagca caaatgacag gcgacgataa tacacaaaaa  
3841 aagttcctaa aggaaaaacc aaatcatttt tgatataata ctcaatcaca agtttttctt  
3901 ttgtgatata aattctttta atatttgcca ttctatagat cttttgtgca agtgcatata  
3961 taactaaaag aaatgtaaaa aaaactataa accatttata atctatttct ttgctagat  
4021 taaataatct aggaacaaa taaagcgcaa aacataaaag

//

LOCUS ECFEEEMN\_4 4049 bp DNA linear 12-APR-2021

DEFINITION Campylobacter species strain strain.

ACCESSION

VERSION

KEYWORDS .

SOURCE Campylobacter species

ORGANISM Campylobacter species

Unclassified.

COMMENT Annotated using prokka 1.14.6 from  
<https://github.com/tseemann/prokka>.

FEATURES

Location/Qualifiers  
source 1..4049  
/organism="Campylobacter species"  
/mol\_type="genomic DNA"  
/strain="strain"  
gene complement(403..3918)  
/locus\_tag="ECFEEEMN\_00044"  
CDS complement(403..3918)  
/locus\_tag="ECFEEEMN\_00044"  
/inference="ab initio prediction:Prodigal:002006"  
/codon\_start=1  
/transl\_table=11  
/product="hypothetical protein"  
/protein\_id="Prokka:ECFEEEMN\_00044"  
/translation="MKIKNFTLITSNHNLKIELKNLTKNANKIIFICSDFDGYKEAEN  
SLYKTLHTIEDNFKIDNTKTFKIIHLNQTNKDEITKEQKFSDDKNLSSIKKIIYNNLK  
LLNDTINQENKTLNKIIDESNEKNIENFLKEIQKELNILLKNIKESNYFDQEIKPKI  
QVTLDTLFNTLLKNIAQSNDDYKQIIRAVAKFFINILDSITSLLKPKISLIKKNPYVL  
IVNTLFEAYNSYSEYQEYKEKKYDFAYPLLELITSKLYPIIALCNEEILSDVLIID  
DKVLLDFSSYTNAPSISLYKNSFYKIIILDEEFQGVFDNLENLKFENEKLDNTLLVN  
SSLNNSDRTLKAINLNISKLNHFFYAEPDLNSSLVEMILDKKNADQINTTKMGKN  
YLFITNPPQLNAGLCELDYQKGLGAIKRNPKALTKNEKLALKGDFPSKRDYGSYFI  
ERDVKKEDDFVLQLCPFAKLDGQIYQYKGYFNFYNTYSWMKLYLLEYINERFEYER  
FKQDFAYIDNFFKLPKELEKISEKEKEKVKEYVELFNDYLDKINFRYDQIQFFLGSEP  
LMFKTYENVDFKKYSPLTVLLTLTYVLQKDLAFTQEYSLGVKNIAIPNPDYGDKEI  
SLNYQRIKIPNYFNEYILFIPDDIYFYDNDKKIYIFLSKELNKNKKEDEVIYLDLAK  
AMFENDLKEDDQTYVKFLNTLNENFDDEIEFEENIQTNQTLPTKKDLKSIQEIMLDN  
ELAKLSLDITFFNIKQLFPFTEFFMSQPDFFKMILFFINSSDDKYYGNKLFSSFK  
AHFFKELGIFYALNPKGRFIKIIIPKNKPFNKLFYQIGTNYFFSQSEYASELKSK  
SFSRLDKAKQIHLISKARKQLAIDFSIKVSKNLSADVLKNLAGSFIDTLLPTNYERLK  
ILYEKLMYEKLTNYDFPLAVKKEEYITYPLLINSRFMSFDLSEFIFGSLCTGGLNY  
YPSIACITTSSEAREFALKRLLSYIILDEKRSAFMEDKINEGKYIINDKEFFEKNIE  
LRNCNIYKLEHFQRKEEYKTQNPMIKQHPILAYNDTIQILYEYINGIYNTIQDEKGNF

IEDRQKARRLMENLETIGQHNLEVMYKGINEENDETEKIISQNKRHYKNIENLITNNK  
SQDYSNKFIGRLATTIIMEDGLYMG"

gene

complement(3915..4031)  
/locus\_tag="ECFEEEMN\_00045"

CDS

complement(3915..4031)  
/locus\_tag="ECFEEEMN\_00045"  
/inference="ab initio prediction:Prodigal:002006"  
/inference="similar to AA sequence:RefSeq:CKG86393.1"  
/codon\_start=1  
/transl\_table=11  
/product="methyltransferase small"  
/protein\_id="Prokka:ECFEEEMN\_00045"  
/translation="MQNLKLQIAQGLDKILEDEDRKQELYVCKFVVVNGVKV"

ORIGIN

```
1  ttcttatacc  acttcttata  actaaatatt  tatacttttc  ttttttagtt  ttttagtgagt
61  tataataagc  tttttctgct  ttagtccaag  gagctatgct  tcctttaatg  ggatctttta
121 aatatatact  ttgccaatct  ttaaattcaa  gcaaagtgga  tttttgccct  gtgtgaaatt
181 caggatctag  atacctaggt  tgataattaa  tataaggaga  ggttcttaaa  attctatcgg
241 cttcaaacia  agcttttaga  tattcttggg  tgtatttgcc  tgtaggtttt  tttgactttg
301 actctgaaaa  tagtatTTTT  ccgctttggt  tatctacatt  taatataaaa  ccttcgggtg
361 tataaatttc  ataagtttca  ctcattttta  tcctttctta  atttatccca  tatataaacc
421 atcttccatg  attatagtag  tggctagtct  gcctataaac  ttattagaat  aatcttgga
481 tttattattg  gtaattaaat  tctcaatatt  tttataatgt  cttttgtttt  gcgatattat
541 tttttctggt  tcatcattct  cttcatttat  ccccttatac  atcacttcta  aattatggtg
601 tcctatgggt  tctaaatttt  ccatcaatct  tcttgccctt  tgcctatctt  ctatgaaatt
661 acccttttca  tcctgtatag  tattgtaaatt  tccatttatg  tattcatata  aaatttgtat
721 agtatcatta  taagctaaga  taggggtgtg  ttttatcata  ggattttgtg  ttttatactc
781 ttcttttctt  tgaaaatggt  cttagcttata  tatattacaa  tttctaagtt  ctatattggt
841 tttttcaaaa  aattccttat  catttaagat  atatttgccc  tcattgattt  tatcttccat
901 aaaagcactt  cttttctcat  ctaaaataat  ataagataaa  agtcttttta  aggcaaatc
961 tctagcttca  cttgaagttg  tagtgcaagc  aatactagga  taataattaa  gccacactgt
1021 gcacaataaa  gaacaaaaaa  taaactcaga  taaatcaaaa  ctcataaatc  tagaatttat
1081 caataaagga  taggttatgt  actcttcttt  ttttacagct  aaaggaaaaat  cataattgta
1141 agtcaatttt  tcatacatta  gtttttcata  taaaattttt  aatctttcat  aattttagg
1201 caaaagtgtg  tcaataaaag  aacctgctaa  attttttaat  acatccgcac  ttaaattttt
1261 acttacttta  atagaaaaat  caatagctaa  ttgttttctt  gcttttgata  tcaaatgaat
1321 ttgcttagct  ttatccaatc  ttgaaaaact  ctttgatttt  ttcaactcgc  ttgcatattc
1381 tgattgacta  aaataataat  aatttgttcc  tatttgatat  aaaaaaagct  tattgaatgg
1441 ctttttattt  tttgggatga  tttttataaa  acgcccttta  ggattaagtg  cataaaatat
1501 ccctagttct  ttaaaaaaat  gtgcttttaa  actagaaaaat  aatttattgc  cataatactt
1561 tttatcagag  cttgaattta  taaaaaataa  aatcattttt  ttaaaaaaat  caggctgact
1621 cataaaaaat  tctgtaaaag  gaaaaagttg  cttaatgata  ttaaaaaaag  tgatatctaa
1681 ggatagtttt  gcaagctcat  tatcaagcat  aatttcttga  atacttttat  ctaaattcctt
1741 tttttagtag  agtgtttgat  ttgtttgtat  attttcttca  aattcaattt  catcatcaaa
1801 gttttcattt  aaggtgttta  aaaatttcac  ataagtttga  tcatcttctt  taagatcatt
1861 ttcaaacata  gcttttagct  attcatctaa  atagatgact  tcatcttctt  ttttattttt
1921 atttaactct  ttggataaaa  agatgtaaatt  ttttttatca  ttatcataaa  aataaatatc
1981 atcggggata  aataagatat  actcattaaa  ataatttgggt  attttaattc  tttggtaatt
2041 aagtgaattt  tctttatcgc  cataatctgg  atttggaatt  gcaatatttt  taacaccaag
2101 agaattattt  tgcgtaaaag  ctaagtcttt  ttgtaaaaca  tacaagttta  aagtcaataa
2161 aacaaccggt  aaaggtgagt  atttcttaaa  atctacattt  tcatatgttt  tgaacattaa
2221 tggttctgag  ccaagaaaga  attgtatttg  atcataacga  aaattgatct  tatccaaata
2281 atcattaaaa  agctcgacat  attcttttac  tttttctttt  tctttttcgc  taattttctc
2341 aagctcttta  ggtaatttaa  aaaagttatc  aatataagca  aaatcttgtt  taaatctttc
```

```

2401 atattcaaat cgttcattta tatattctaa taaataaagt ttcacccaag aatatgtttg
2461 attataaaaa ttaaaatata ccttatattt ttgataaatc tgtccatcaa gtttcgcaaa
2521 aggacaaagt tgcaagacaa aatcatcttc ttttttaaca tctcttttcta taaaataaga
2581 accataatct cttttgctag gaaaatcgcc ttttaatgca agtttttcat tttttgtaag
2641 agctttgggg cgatttttta ttattgctcc taattttttt tgatacaaat cttcgcaaag
2701 ccctgcatta ttaagctgtg gtggattggg aataaataaa taattttttac ccattttggg
2761 tgtattgatt tgatcagcat tttttttatc cagtatcatt tctactagca tggaagaatt
2821 taaatcaggg tattctgcat aaaagaaatg attgagtttg gagatattta aatttatcgc
2881 cttttttaat gttgtgtcag aattatttaa actagaattc actaaaagag tgttgtctaa
2941 tttttcattt tcaaatttta gattattttc taaaaaatta tcaaaaacac cttgaaattc
3001 ttcacataaa ataattttat aaaaactatt tttataaaga ctgatagaag gtgcattagt
3061 ataagatgaa aatctaata atactttatc atctataatt aacacatcag ataaaatctc
3121 ttcattgcat aaagcaataa taggataaag tttgctagtg ataagttcta aaagtggata
3181 agcaaaatca taataatatt ttttttcctt atactcttga tattcagagt aagaattata
3241 agcttcaaat aatgtattta caatcaaac ataaggattt tttttaatta aagaaatggg
3301 ctttttaagg ctggttatag aatctaatat attgataaaa aatttcgcta cagctctaata
3361 aatttgctta tattcatcat cattagattg ggcaatattt tttaaaagtg tgttaaaaag
3421 cgtatctaaa gtaacttgta tctttggcct gatttcttga tcaaaaataat tagattcttt
3481 gatatttttt agtaatatat ttaattcttt ttgaatttct tttaaaaaat tttcgatatt
3541 tttttcattg ctttcatcaa taattttatt gagtgtttta ttttcatttt gattgattgt
3601 atcatthaaa agtttttaaat tattatagat aattttttta atgctagata aatttttatc
3661 agagctaaat ttttgttcct ttgtgatttc gtcctttattg gtttgattta aatgtatgat
3721 tttaaaagtt tttgtattgt caattttaaa attatcttca atagtatgta atgttttata
3781 cagagaattc tcagcttctt tatatccatc aaaatcactg catataaaaa taattttatt
3841 agcatttttg gtaagatttt ttaactcaat ttttaatta tgatttgatg taattaaagt
3901 aaaatttttt attttcatac ttttaaccca tttaccacca caaattttaca aacataaagc
3961 tcttgttttc tatcttcatc ttctaagatt ttatctaata cttgtgcgat ttgaagtttt
4021 aaattttgca tttttgcagg agttaaataa

```

//

```

LOCUS      ECFEEMN_5                3161 bp    DNA        linear      12-APR-2021
DEFINITION Campylobacter species strain strain.
ACCESSION
VERSION
KEYWORDS   .
SOURCE     Campylobacter species
  ORGANISM Campylobacter species
            Unclassified.
COMMENT    Annotated using prokka 1.14.6 from
            https://github.com/tseemann/prokka.
FEATURES   Location/Qualifiers
  source   1..3161
            /organism="Campylobacter species"
            /mol_type="genomic DNA"
            /strain="strain"
  gene     368..550
            /locus_tag="ECFEEMN_00046"
  CDS     368..550
            /locus_tag="ECFEEMN_00046"
            /inference="ab initio prediction:Prodigal:002006"
            /inference="similar to AA sequence:RefSeq:CKG87535.1"
            /codon_start=1
            /transl_table=11
            /product="methyltransferase small"
            /protein_id="Prokka:ECFEEMN_00046"

```

```

/translation="MPHRGRHPNEYHEYILEKMNKIDKIARGDKNKFLKEFEKLKEEI
KNNPAILRKEYYKERK"
gene      550..1116
          /locus_tag="ECFEEEMN_00047"
CDS      550..1116
          /locus_tag="ECFEEEMN_00047"
          /inference="ab initio prediction:Prodigal:002006"
          /inference="similar to AA sequence:RefSeq:CKG87555.1"
          /codon_start=1
          /transl_table=11
          /product="hypothetical protein"
          /protein_id="Prokka:ECFEEEMN_00047"
          /translation="MRYYKMMYNGQHNDVDNWINCVPDIKNNDKYALLESKPITNWQ
TPTFEIDKDDGKILDLISNVYNWRIVSPKFINLMQDLIKDCVQYLDVEIRSQEINYY
DCKIMHVTKSLEALDYEHSVYTYMGDNDEYLSITKAVLKKSKLDGSHIFRIKDDEIPV
FVSNEFRKRVRRENNLLGFSFSEVMVYEN"
gene      1199..1750
          /locus_tag="ECFEEEMN_00048"
CDS      1199..1750
          /locus_tag="ECFEEEMN_00048"
          /inference="ab initio prediction:Prodigal:002006"
          /inference="similar to AA sequence:RefSeq:CKG87579.1"
          /codon_start=1
          /transl_table=11
          /product="hypothetical protein"
          /protein_id="Prokka:ECFEEEMN_00048"
          /translation="MTREQAELIIKEEKLIDTDWYPSYKHSGEYHLMWFSDSDNNKYE
AVYIGERGSVEFEYSFDSEKEAIDKMLQMNYEQKKYDGDIKGYLTKEVALRIIKEEN
LEVIWYDEALKPLCAGIKHDKQRDKYISFITNAKAEIIIEYRSIEFDGDEEFEGKIYND
EDIALYALINRARMIKQNKISFV"
gene      1821..2171
          /locus_tag="ECFEEEMN_00049"
CDS      1821..2171
          /locus_tag="ECFEEEMN_00049"
          /inference="ab initio prediction:Prodigal:002006"
          /inference="similar to AA sequence:RefSeq:CKG87641.1"
          /codon_start=1
          /transl_table=11
          /product="hypothetical protein"
          /protein_id="Prokka:ECFEEEMN_00049"
          /translation="MEDLKLLQRRWEEAYEAMPKLYETPDELIINFTLSEDTDTILFK
EPWENFELDDEDKEVKWRLSFFSISKDEPLGYLEYKEALEKLQDFSLIQSEERILIKA
MSLEELESLELKGW"
gene      2171..2803
          /locus_tag="ECFEEEMN_00050"
CDS      2171..2803
          /locus_tag="ECFEEEMN_00050"
          /inference="ab initio prediction:Prodigal:002006"
          /inference="similar to AA sequence:RefSeq:CKG87668.1"
          /codon_start=1
          /transl_table=11
          /product="hypothetical protein"
          /protein_id="Prokka:ECFEEEMN_00050"
          /translation="MLPQPIFLNKLIELLSDENLDIVNMKKGVDKIFSKKDFYAILEL

```

NIKIMNIAKLIFKSDEKLNILLPQISDHKNINYFLQELELKKEMDVNLNDLKNYDNKK  
IIEIIKQKYQNNPVKELDINSQKEKIKILFIVNEVPKFLKSIYKECKFKEYGLANYLE  
FDEIWDIFYENNTYFAILTPMGANKIKLRLENTQNSEKELNIEVNLDDK"

ORIGIN

1 cttgaaggtg cagcaattgt aaaactaatg aatttagata aagaagaatt taaacaatac  
61 aaatactttc cttatgattt aatttaactt tagtggggtt aaaaaccac aaggcttttc  
121 atggctagaa tttgctatac ctaaaaagaa taagattcaa tttgcttttag ctaaaataca  
181 agctagtcct cttgctaaga ttgagtatga taggataaga tgggaaggga taggaggtaa  
241 aagaaatcaa ttaccaatcc aaacctatca cattgctact gataagagta aaaaatatac  
301 tccaaaattt caagagatac ttaatttata tgatttaaaa ctaaattggag attggaataa  
361 agttaaagt ccacatcgcg gaagacatcc caatgaatat catgaatata ttcttgaaaa  
421 aatgaataaa attgataaaa tagctagagg ggataaaaat aaattcttaa aagaatttga  
481 aaaactaaaa gaagaaatca aaaataatcc tgctatactt cgtaaagaat actataagga  
541 gagaaaataa tgagatatta taaaatgatg tataatggac aacataatga tgtcgataat  
601 tggataaatt gtgttaaacc agatataaaa aataacgata aatatgcact tttagaatct  
661 aaacctatta caaattggca aacacctaca tttgaaatcg ataaagatga tggtaaaata  
721 ctgactgatt taatatctaa tgtatataat tggcgtatag tctctccaaa atttataaat  
781 ttaatgcaag atttaatcaa agattgtgtg caatatttag atgtagaaat tagaagtcag  
841 gaaataaatt attatgattg taaaattatg catgtaacaa aatcacttga ggcttttagat  
901 tatgaacatt ctgtatatac ttatatgggt gataatgatg aatatttaag cactactaag  
961 gctgttttaa aaaaatcaaa acttgatgga agtcatatat ttagaattaa agatgatgaa  
1021 atacctgttt ttgtatcaaa tgaattttaga aaaagagtga gagaaaacaa tttattaggt  
1081 tttagtttta gtgaagttat ggtatatgaa aattaataaa catataaaaa tattataatc  
1141 ataaattata taaacttatt aggttttatc aaacaaatac cataataaag gatagaaaat  
1201 gacaagagaa caagcagaat taattataaa agaagaaaag ttgattgata cagattggta  
1261 tccttcttat aaacattcag gagaatacca tcttactatg tggtttgatt ctgataataa  
1321 taaatacgaa gctgtttata ttggagaaag aggcagtgtt gaatttgagt attcctttga  
1381 tagtgaaaaa gaagctattg ataaaatggt gcagatgaat tatgaacaaa aaaaatacga  
1441 tggaaaagac attaaaggat atctaacaaa agaagtagca ctaagaatca tcaaagaaga  
1501 aaatctagaa gtgatttggg atgatgaagc acttaaacct ttatgtgcag gtattaaaca  
1561 cgataaacia agagataaat acatttcttt tctactaat gctaaagcag agattataga  
1621 atacagaagt attgagtttg atggggatga agaatttgaa ggaaaaatat ataagatga  
1681 agatatagcc ctttatgctc ttatcaatcg tgccagaatg attaagcaaa ataagattag  
1741 ctttgtgtaa ataccttctt tatgatttaa tttaaaaaga tttttagcta taatttcatt  
1801 ttatatttaa ggaaaaattt atggaagatt taaaactttt acaaaggcgt tgggaagaag  
1861 cttatgaagc tatgcctaaa ctttatgaaa caccgatga gtttaataa aatttcaccc  
1921 taagtgaaga tacagatact attcttttta aagaacctg ggaaaatttt gaattagatg  
1981 atgaagataa agaagtcaaa tggagactaa gtttttttag cattagtaaa gatgagcctt  
2041 tggggatttt agagtataaa gaagcttttag agaaattgca agatttttct ttaattcaat  
2101 cagaagaaag aattttaatt aaagcagatg gtttgaaga gcttgaaagt ttagagctta  
2161 aagggtggta atgcttctc aacctatatt tttaaataaa cttatagaat tgttatctga  
2221 tgagaattta gatattgtaa atatgaaaaa aggcgtagat aaaattttt ctaaaaaaga  
2281 tttttacgct atactagaat taaatatcaa aattatgaat atagcaaaat taatttttaa  
2341 aagtgatgaa aaattaaata tattattacc acaaatttct gatcataaga atataaatta  
2401 ttttcttcaa gaattagagt tgaaaaaaga aatggatggt aatcttaatg atttaaaaa  
2461 ttacgataat aaaaaataa tagaaataat taacaaaaa tatcaaaaca atccggttaa  
2521 agaattggat attaatctc aaaaagaaaa aatcaaaata ctttttattg ttaatgaagt  
2581 accaaaattt ttaaaatcaa tctataaaga atgcaaat taaagaatat gattagcaaa  
2641 ctatttggaa tttgatgaaa tttgggattt ttatgaaaat aatactagat attttgctat  
2701 tttactcct atgggtgcaa ataaaaataa attgctttta gaaaatacac aaaacagcga  
2761 aaaagaactc aatatcatag aagtaaattt agataaaaaa taaattttta taacaaaaat  
2821 aagcaatttc tttttctac tcaaatttag actatctgtg ttaaaatatt tcttaataga  
2881 tataaaaaa attataataa tagaaaactt aatgagttta cactaaaaac tacaacaac  
2941 ccaaaagat catcaatgct ctttaattct tatatgagtc ttgatataat aaatcact

3001 tcaaatcccc taccctttaa aatcactaaa gccttcatca aagaaagtct tgaagagctt  
3061 ttttctatag aatgtgaagg cttttttgaa agtttagaac aagatttatt ttctttaaat  
3121 actttaacca atgcttcatc tcattctaagc acccctacaa c

//

LOCUS ECFEEEMN\_6 2527 bp DNA linear 12-APR-2021

DEFINITION Campylobacter species strain strain.

ACCESSION

VERSION

KEYWORDS .

SOURCE Campylobacter species

ORGANISM Campylobacter species

Unclassified.

COMMENT Annotated using prokka 1.14.6 from  
<https://github.com/tseemann/prokka>.

FEATURES

Location/Qualifiers

source

1..2527

/organism="Campylobacter species"

/mol\_type="genomic DNA"

/strain="strain"

gene

complement(192..1442)

/locus\_tag="ECFEEEMN\_00051"

CDS

complement(192..1442)

/locus\_tag="ECFEEEMN\_00051"

/inference="ab initio prediction:Prodigal:002006"

/inference="similar to AA sequence:RefSeq:CKG87785.1"

/codon\_start=1

/transl\_table=11

/product="hypothetical protein"

/protein\_id="Prokka:ECFEEEMN\_00051"

/translation="MKQILSANRVSFHLLSTKTFSDKEYLNAWSLKGRLNAKDWFEF  
KQANKDKFYNKHLENTLKAMQEFKAYFSVDKFEGINFGGNDWLIFLPKNYQIYNRL  
CRDKSKYILHRYQKNDLAEIGALKNLAPNPFWDEKGENFSQSQIDTFIEKDNLAPY  
FNKYDIYFNSSLELSFNFSDESLEYLINNYNHRIDHTFTPKSQDEIQKELNLSKEEKI  
ILELENMFLNLCKGISADYAFMDFSFFVGYDHTLDSKNNTLKSYPINQDKLIHKRSF  
KEYIEEYANTYFLNYYSKEFLNELDDQELNKNRLNYLLINYNKIPKNTTEENTQGILS  
KQKDININFVNFIDYKDYVYNNKDDFWFSAEENSILWEKFLSKNTLKPFLNFDCSL  
EEKLLYAKDKQLENILKTHKAFHG"

gene

complement(1439..1900)

/locus\_tag="ECFEEEMN\_00052"

CDS

complement(1439..1900)

/locus\_tag="ECFEEEMN\_00052"

/inference="ab initio prediction:Prodigal:002006"

/inference="similar to AA sequence:RefSeq:CKG87488.1"

/codon\_start=1

/transl\_table=11

/product="hypothetical protein"

/protein\_id="Prokka:ECFEEEMN\_00052"

/translation="MKNKNLLDKDTQEVFKYYLKNDSYLLKGGALDGLKKYERRAFISSI  
LSY EYKNLVENGLKVDKEYKAILPPNLI AILEYDKSEFNANLRNFINDLEFELEHI  
EMELYDDPADFEGGDYNEDESEDEDYTVEDWVEDQVSDIRDFLYALEDFK"

gene

complement(1946..2374)

/locus\_tag="ECFEEEMN\_00053"

CDS

complement(1946..2374)

/locus\_tag="ECFEEEMN\_00053"

/inference="ab initio prediction:Prodigal:002006"  
/inference="similar to AA sequence:RefSeq:A0H52017.1"  
/codon\_start=1  
/transl\_table=11  
/product="ankyrin domain protein"  
/protein\_id="Prokka:ECFEEEMN\_00053"  
/translation="MHFWVMQNNYELLELELAIKGGANVDMQTRLIQESEYNETLLFEAV  
KEAETYRVTQLLIELGANVNFATPSTPLDIAKGSRNKLLKDAGAMTSEQIRKKFNLP  
AYDSSHCEIDGKTDFLLGKYHDEYSKLLNDAIKKAKESE"

ORIGIN

```
1 ctccttgat ttcatcatta agcataatag gaacattgtc tgatTTTTATT cTTTTAGcTT
61 tTTTTgctt taacttaact ctacctcat gtaagcatac taaagtatta tcttctaata
121 taggatgcaa acaagaagta tcaggactta cattaatatt ttttattcta ggaatagtga
181 ttattctttt tttagccatg aaaagccttg tgggttttaa gtatgttttc tagttgttta
241 tctttggcat aaagaagctt ttcttctaaa gagcaatcaa aatttaaagg aaagggtttt
301 aggggtgttt tacttagaaa tttttcccaa agtatagaat tttcttctgc tgaaaactcc
361 caaaaatcat ctttattggt ataaacatag tctttataat ctataaaatt taaaaatta
421 atatttatat ctttttgttt agaaagtatg ctttgtgtat tttcttcttc tgtgtttttt
481 ggaatTTTgt tgtaattaat aagataataa ttaagtctat ttttatttaa ttcttgatcg
541 tcaagttcat ttaaaaactc tttagaataa taatttaaaa aataagtatt tgcgtattct
601 tctatatatt ctttaaaact tcttttatga attaatTTtatt cttgattaat gggataagat
661 ttaaaagtat ttttttaga atctaaagta tgatcatatc ctacaaaaaa ataagaaaaa
721 tccataaaaag cataatcagc actgatgcct ttgcaaagat ttaaaaacat attttcgagt
781 tctaaaatga ttttttcttc tttgcttaa ttaattctt tttgtatctc atcttgactt
841 tttggagtaa agtatgatc gattctgtga ttataattgt taattaaata ttctaagctt
901 tcatcactaa aattaaagct taactcaagc gaagaattaa aataaatatc atatttatta
961 aagtaggggtg ctaaattatc tttttctata aaagtatcaa tttgactttg agaaaaattt
1021 tctccttttt catcccaaaa aggaaaatta ggagcaagat ttttaagtgc accaatctct
1081 gccaaatcat ttttttgata atatcgatgt aagatatatt tgcttttatc cctgcataaa
1141 cgattataaaa tttgagtata attttttggg aaaaaaatta accattcatc attgccaccg
1201 aagttaattc cttcaaattt atcaacacta aaataagctt taaactcttg catagctttt
1261 aaggatTTTT ctaaattggt gttataaaat ttatctttat tagcttgttt aaattcaaac
1321 caatctttgg catttaaagc ctgcctttt aaactccaag cattaagata tttttcatca
1381 ctaaaagttt tagtagataa aagatgaaag ctactcgggt tagcgttaa tatttgtttc
1441 atttaaaatc ttccaaggca tataaaaagt ctctaatac gcttacttga tcttctacc
1501 aatcctccac tgtataatcc tcatcacatt cgctatcttc gttataataa tctccccctt
1561 caaagtcagc aggatcatca tagagttcca tttctatatg ttctaattca aattccaaat
1621 catttataaa atttcgaaga tttgcaccat taaattcact tttatcatat tctaaaatgg
1681 cgattaagtt aggtggtaaa atagctttat atttttcatc gacttttaa ttgccatttt
1741 ccactagatt tttatattca tagcttaaga tgctacttat aaaagctctt cgctcgtatt
1801 tttttaaacc atctaaagca ctttttaaat aactatcatt ttttaagatag tacttaataa
1861 cttcttgctg atctttatcc aataaatttt tatttttcat tatctttcct tatagtttat
1921 tttagcaaag tgaatttcta ttccctcatt cactttcttt agcttttttt atagcatcgt
1981 ttaaaagctt ggaatattca tcatgatatt tacccaataa gtcaaaatca gtttttccat
2041 caatttcaca atgagaagaa tcatatgctg gtaaattaaa tttctttctg atttgttctg
2101 aagtcattgc tcctgcatct tttaaaagct ttttatttct agatcctttt gcaatatcta
2161 aagggtgtgct tggggtagca aaatttcat tggctccaag ttcaattaaa agctgtgtaa
2221 ccctataggt ttctgcttct tttacagctt caaataaaag ggtttcatta tattcactct
2281 cttgaataag tcgggtttgc atatctacat tagctcctcc tttaatggct agttctaata
2341 attcataatt attttgatt acccaaaaat gcataggagt cctaccgaa tatccttcag
2401 catgcacttc aaatttagcc ccacgattga ctagatactt aatgatttga gagtttggat
2461 ttttagcgcc taatatataa gcataaatta aagcttttctg acaaaataatg ttgctttctt
2521 ttgctttt
```

//

LOCUS ECFEEEMN\_7 2407 bp DNA linear 12-APR-2021  
DEFINITION Campylobacter species strain strain.

ACCESSION  
VERSION

KEYWORDS .

SOURCE Campylobacter species

ORGANISM Campylobacter species  
Unclassified.

COMMENT Annotated using prokka 1.14.6 from  
<https://github.com/tseemann/prokka>.

FEATURES Location/Qualifiers  
source 1..2407  
/organism="Campylobacter species"  
/mol\_type="genomic DNA"  
/strain="strain"  
gene 40..510  
/locus\_tag="ECFEEEMN\_00054"  
CDS 40..510  
/locus\_tag="ECFEEEMN\_00054"  
/inference="ab initio prediction:Prodigal:002006"  
/codon\_start=1  
/transl\_table=11  
/product="hypothetical protein"  
/protein\_id="Prokka:ECFEEEMN\_00054"  
/translation="MPAFTSQSV\*KSKVEFSDSKEYCSSIFVCMELDFKDVLSCIWAD  
KF\*WTLRKNSFSIVWKDFSIINLFSPTFLISSLWIIIVF\*FAPISISLFSPTNS\*EF  
LATLTLSTPTFKVLLNPTMVSLDKPTLIKYSAPTLTFLAKSMV\*V\*TFLILSL"

ORIGIN

```
1 gtaacaattt gagtatcacc tacttgatgg aggatttgat tgcctgcttt tacttcacaa
61 tctgtttgaa agtcaaaagt agaattttct gattctaaag aatattgctc ttctatcttt
121 gtttgcattg aattagactt taaagatgtg ttatcttgta tatgggcgga taaatgttga
181 tggacattaa ggaaaaattc tttttctatt gtttgggtta aagatgtttc tattaataat
241 ttatgttctc cttcacatt cttatctca tctttatgga taatagtatt ttgatttgca
301 cctatttcta tatctttggt ttctctaca aactcatgag agtttttagc cactcttact
361 ttattatcta ctctacatt taaagtattg cttaatccta ctatggatc tttagataaa
421 cctacattga ttaaatattc agcccctaca ttgacatttt tagccaaatc tatggtttga
481 gtatgaacct ttttaacct ttcattataa attccatcta ctatagaatc tttatcattt
541 aaaattcttt gagtgaaatt atgttgcact aattcatcat aatccttttg ggcttttaaa
601 taaatgtggt ctttgtcttt tatatgtgag agggtaagtt cattataacc ttcttcattt
661 gtcctatgg ttttagaaga aagagaagtt tgatgatcat taaaaggaag atttactaag
721 cttggattag cccattata caaactagag ctacatagg gtttatctat atcatcatct
781 aaaaagaaa caatcacttc atctcccact cttggagtat gaaaaagcc tgaatgattg
841 cttgctatac ttgttgctac tcttaaaaaa ggagtatgat gataagattt ataagcattg
901 cttgataaat gattagaaga gtttgtgaag tttgtattat ctttagaatc agtattgttt
961 gtatgttcat gattattggt ttttatgttt gcacttaaaa gattattatc taattcctct
1021 tgattagcat aaagattaat cttacctta acccttccat actcatcagt ataaatagta
1081 tttctctcac tttctatac cttactctct cctataacaa taccttgagt attatgaggg
1141 gctttaggct tagctttaaa acttgagta aagataatat tcttttttaa taaagttaaa
1201 gtattagaat aagacttact taaatttaaa tcttttaaat ttaaagatc attagtattg
1261 atagaattag ctagtaaagc atcatctatt aagatttgag tattggcaat aataataaag
1321 tctttaagca aagaagcttt atcttgtttt tcttcatctt gacttttagt atcttcatca
1381 tcaactcaatc cactcaaatt aaattcctta taatttaaag tgataaaatc tcccaacta
1441 agatgataaa tattactttt tgctagcaag ctttcattta agatcaaagc tctttttctt
1501 ttaagagaag gcttagtctt taaatcaata cttcttgtaa aagaatattc actctcataa
```



```

1561 aaatgttcat tataataagc tttgttatta agttcttgct cataaggaac tttactagaa
1621 tgtaaagata aaagatttaa aggagtatta gcattgatac tagaatgtgt aaaagcatta
1681 gttcttaagc tttgctcttt atagatagaa gaaatacaag cttgatttaa aatattattc
1741 acattaggat tgtactcaat ttctttatntt tttacatttt tatacacatc acaaaaaataa
1801 atagtgtttt catcttcata aaaaaagatt ccattattgt gagctaactt tgtgataaat
1861 tctaaatcgc tttcattgta ttgagagatg agttcttggt cttcataatt aaaatgtata
1921 tgagaataat caatttcitt atgtaagata tcttgataaa aaccaagggt ttgtttaatc
1981 acttctatga tatgagtatg agtataaata cgattggcct tatttaaaga agtccttacc
2041 aagactgatt gaagcttaaa agaaaaaaaaa tgcttgtatt ttatttgctt agtgtttgaa
2101 gtgctatcat tgatatttaa agcactctca tgattgatac ctatagatatt tatataagtg
2161 atgattcctt tatagttttt tacttcatta tgatcaaagt ttaaggattt gttctcataa
2221 ggattatgga tacttaaaat agcttcttga tcgattaaaa cattaggatg aaaattaaaa
2281 gttgtagggg tgcttagatg agatgaagca ttggttaaag tatttaaaga aaataaatct
2341 tgttctaaac tttcaaaaaa gccttcacat tctatagaaa aaagctcttc aagactttct
2401 ttgatga

```

//

LOCUS ECFFEEEMN\_8 2139 bp DNA linear 12-APR-2021

DEFINITION Campylobacter species strain strain.

ACCESSION

VERSION

KEYWORDS .

SOURCE Campylobacter species

ORGANISM Campylobacter species  
Unclassified.

COMMENT Annotated using prokka 1.14.6 from  
<https://github.com/tseemann/prokka>.

FEATURES

Location/Qualifiers

source

1..2139

/organism="Campylobacter species"

/mol\_type="genomic DNA"

/strain="strain"

gene

complement(23..667)

/locus\_tag="ECFFEEEMN\_00055"

CDS

complement(23..667)

/locus\_tag="ECFFEEEMN\_00055"

/inference="ab initio prediction:Prodigal:002006"

/inference="similar to AA sequence:RefSeq:CKG87616.1"

/note="Domain of uncharacterised function (DUF1910)"

/codon\_start=1

/transl\_table=11

/product="hypothetical protein"

/protein\_id="Prokka:ECFFEEEMN\_00055"

/translation="MVRDTSKDEAYFTKHIIECEEKIKKSEKILLELPGFKRETCLFC

ITDRKKCIAMDKYSRGDDINPVKKDLEAYVLLKQKNRLEFAIDIGYYRGNALCLIRV

LLDMSACVLELIEEDERKRRDILNRDWF LHFMSGKGNLNLERKCNCKEHELIFV

ATKDIEFLHQYMKKHTRLRDLDTWDLGAAIVKLMNLDKEEFKQYKYPYDLI"

gene

complement(826..1515)

/locus\_tag="ECFFEEEMN\_00056"

CDS

complement(826..1515)

/locus\_tag="ECFFEEEMN\_00056"

/inference="ab initio prediction:Prodigal:002006"

/codon\_start=1

/transl\_table=11

/product="hypothetical protein"

/protein\_id="Prokka:ECFEEEMN\_00056"  
/translation="MIQQENLDDIVLKFKCKLDFSAQYGLKTEEFITYGVFDDLLFT  
FEHYLEEEDDCISFSVSRVKSMSKSEILCKIIGLDQPNLDFKILNQHGVRSPFSPFK  
SMEFTNLNDLKQSGLDMPDSYHSFLKAYKESIDTLIEAFKTDTTNTIKGLYDFIYN  
YEENEDTIWQDRITLMQVLLLIELNQKEQALKILKNNQKAIEERDFTIEYDDGSIEVFD  
VLKHSIENDLC"

gene

complement(1516..2133)  
/locus\_tag="ECFEEEMN\_00057"

CDS

complement(1516..2133)  
/locus\_tag="ECFEEEMN\_00057"  
/inference="ab initio prediction:Prodigal:002006"  
/codon\_start=1  
/transl\_table=11  
/product="hypothetical protein"  
/protein\_id="Prokka:ECFEEEMN\_00057"  
/translation="MSIKGYPIFAIPKKNKIQFALAKIQASPLAKIEYDRIRWEGIGG  
KRSKKNHCKILFSSTQFNDKDKKRKQLKENQINGKRFEQKDFKIFKKECPNAQSQVT  
LRVYDKNKPIVTRVDAIAHCKGKIIIREAKSSKDAPLTQNQIKAFNLISQKNNDITI  
ELRGNKVLKYDNKMLKKGDKILSKNVTIKISRPSGITTYKSTKGI"

ORIGIN

```
1 tgggttttta aaccactaa gattaaatta aatcataagg aaagtatttg tattgtttaa
61 attcttcttt atctaaattc attagtttta caattgctgc accttcaaga tccaagtat
121 ctagaggatc tcttaatctt gtatgttttt tcatatattg atgtaaaaac tcaatatict
181 tagtagctac aaattcttta ataagctcgt gttctttaca attacatttg cgttctaaat
241 ttaaattctt acccttagaa cccataaaat gtaaaaacca atctctattg agaatatctc
301 ttctttttct ctcatcttct tctattaatt ctaatacaca agcactatcc atatctaata
361 atactctaata acaaagttca agagcatttc ctctataata accaatatca attgcaaatt
421 ctaaagcatt tttttgtttt aataatacgt atgcttctaa atctttttta actggattta
481 tatcatcgcc acgagagtat ttatccatag caatacattt ttttctatct gttatacaaa
541 aaagacaagt ttctcttttt ccaaaaggaa gctctaaaag ttttttttcg gattttttta
601 ttttttcttc acactctatt atatgttttcg taaaatacgc ttcactttta ctagtatccc
661 ttaccatttt ctatcctttt tattatggta tttgtttgat aaaacctaat aagtttatat
721 aatttatgat tataatattt tataatattt tcaatcttca cataactaaa cttactaaa
781 actaaaacct aataaattgt tttctcttac acattttaaa aaatcctaac aaagatcatt
841 ttctatagaa tgttttaaaa catcaaatac ttctatactt ccatcatcat attctatagt
901 aaagtctctt tcttcaatgg ctttttgatt attttttaga atttttaatg cttgttcttt
961 ttgattaagt tctataagta gtaaaacttg cattaagggt ctatcttgcc aaatagtatc
1021 ttcattttct tcataattgt aaataaaatc ataaagccct tttattgtgt tagtagtatc
1081 agtttttaaaa gtttcaataa gagtatctat actttcttta taagctttta aaaaactatg
1141 ataagaatca cttggcatat catctaatcc agattgtttt aaatcattca aattggtaaa
1201 ttccatactt ttaaaagaaa atggaaaaga tctaacgcca tgttgattta aaattttaaa
1261 atctaaatta ggctgatcaa gtcctattat cttacataaa atttcatcac ttttcataga
1321 ttttactcta aaagaaacac taaaacttat gcaatcatct tcttcttcta aataatgttc
1381 aaaagtaaaa agtaagtcgt caaaaacacc ataagtgata aattcttctg tttttaaac
1441 atattgtgct gaaaatttgt ccagtttttt gcaaaaattt agaacaatat catctaagtt
1501 ttcttggtgt atcatttaaa ttccttttgt tgatttgtat gttgttattc cgctagggcg
1561 tgatattttt attgtaacat tttttgataa tattttatct cttttttta gcattttatt
1621 gtcataattc aaaactttat tacctcgtag ttctattgtt atgtcattgt ttttttgact
1681 tattaaatta aatgctttta tttgattttg tgttagggga gcatctttag atgattttgc
1741 ctccctgata ataattttac ctttacaatg agctattgca tccactctgg ttgtaacaat
1801 gggtttattt ttatcataaa ctctgagagt tacttgggat tgtgcattag ggcattcttt
1861 tttaaatcct ttaaaatcct tttgctcaaa tcgtttgccg ttaatttgat tttccttaag
1921 ttgtttgctt tttttatctt tatcattaaa ttgagtgcta gaaaaagta ttttacatga
1981 atgatttttc ttacttcttt tacctcctat cccttcccat cttatcctat cataactcaat
```

2041 cttagcaaga ggactagctt gtatttttagc taaagcaaat tgaatcttat tcttttttagg  
2101 tatagcaaat ataggatagc cttttatact cactcctat

//

LOCUS ECFFEEEMN\_9 2022 bp DNA linear 12-APR-2021

DEFINITION Campylobacter species strain strain.

ACCESSION

VERSION

KEYWORDS .

SOURCE Campylobacter species

ORGANISM Campylobacter species

Unclassified.

COMMENT Annotated using prokka 1.14.6 from  
<https://github.com/tseemann/prokka>.

FEATURES Location/Qualifiers

source

1..2022

/organism="Campylobacter species"

/mol\_type="genomic DNA"

/strain="strain"

gene

68..229

/locus\_tag="ECFFEEEMN\_00058"

CDS

68..229

/locus\_tag="ECFFEEEMN\_00058"

/inference="ab initio prediction:Prodigal:002006"

/inference="similar to AA sequence:RefSeq:A0H52015.1"

/codon\_start=1

/transl\_table=11

/product="ankyrin domain protein"

/protein\_id="Prokka:ECFFEEEMN\_00058"

/translation="MTSNEIRKFFNLPAYDSSHCEIDGKTFDILLGKYHDECSKLLND

AIKKAKENE"

gene

222..1889

/locus\_tag="ECFFEEEMN\_00059"

CDS

222..1889

/locus\_tag="ECFFEEEMN\_00059"

/inference="ab initio prediction:Prodigal:002006"

/inference="similar to AA sequence:RefSeq:A0H52014.1"

/codon\_start=1

/transl\_table=11

/product="restriction endonuclease fold toxin 7 domain  
protein"

/protein\_id="Prokka:ECFFEEEMN\_00059"

/translation="MSRVIKINFANVNFHIKEFQKVYILENCKLCFYKPFHLQAKVKN

NGKKFKDKNKKIHQEQEIKKINSQDQSDEKEDINEEQAKAYAEEKIDEEISNFDKNNFT

SNIQTQTIEKRQDKFKDYDIFYDVYTSKDNKDKSLNKLGCDDGFVNNNGIAEVGAEF

FDKCFKKGIYVLIPLRLISLDKNEKLHFDVPVPLEDKGFVVTDFRKGKKEEKIDLTFFQR

SIKIKNPNLALQSPEDFLKALNGNENRDFTEKDQIQAMGIKACGKVKVEITKILL

KDDEKLDIIRGEEKLKEIGRLRDKQNKSPKELSLGRLEFLQRNQDKVEKHKDIID

NLQNSQQAGDNKQNSAKGGAKGGLKQKQTTTNSQEEQKKNKINSKIDIGAGEYAA

SMLFTRSTRYLSNRRKLDANFNTKGFNHTIPDFLVTLNDYPTLVEVKNIQDQALTEQ

ISFELKLAREYELDYLFIENHYTKLVDNITNLKVFNKDNEKHKGSRSGFYHRHFHRS

IKTIFKEMYLHHIKGVAPNKIMIKRLNLPANIEEELNKNKQIQKN"

ORIGIN

1 cccaagaacc cttttagatg atgcaaaagg atctagaaat aaaaagcttt taaaagatgc

61 aggagcaatg acttcaaag aaattagaaa gaaatttaatt ttaccagcat atgattcttc

```

121 tcattgtgaa attgatggaa aaactgattt tgacttattg ggtaaatac atgatgaatg
181 ttccaaactt ttaaacgacg ctataaaaaa agccaaagag aatgagtaga gtgataaaaa
241 ttaactttgc taacgtcaat tttcatatca aagaatttca aaaggtttat atattagaaa
301 attgtaaatt gtgtttttat aagccttttc atttgcaagc aaaagttaaa aacaatggaa
361 aaaaatttaa agataaaaat aaaaaaattc atcaagaaca agaatcaaaa aaaataaatt
421 ctcaagatca atcagatgaa aaagaagata tcaatgaaga acaagcaaaa gcttatgctg
481 aaaaaatcga tgaagagata agtaattttg ataaaaataa ctttacttca aacatacaaa
541 cacaaacct agaaaagcga caagataaat ttaaagacta tgatatcttt tacgatgttt
601 atacaagtaa agacaataaa gataaaagt taaataaaga attaggatgc ggtgatggct
661 ttgaagtaa taatggcata gctgaagttg gagcagaatt ttttgataaa tgctttaaaa
721 aaggaattta tgttttaata ccaagattaa tatctttaga taaaaacgaa aaattacact
781 ttgatcctgt gccttttagaa gataagggtt ttgtggttac tgattttaga aaaggaaaaa
841 aggaagaaaa aatatagac ttaacctttc aaagaagcat agctaaaata aaaaacccta
901 atttagcttt gcaaagtcct gaagattttt taaaagcttt gaatgggaat gaaaatagag
961 attttacaga aaaagataaa atacaacaag cgatgggtat taaaaagct tgtggaaaaa
1021 aagtagatga aataaccaa atattactta aagatgatga aaaattaa gatattatta
1081 ggggtgaaga gaaattaaag aaagaaattg gtagattac agataaaca aacaaatcac
1141 ctaaagaact aagcctacta ggtagacttg aatttttaca aagaaatcaa gataaagttg
1201 aaaaacataa agatattatt gacaatcttc aaaactctca acaagctggt gataacaaac
1261 aaaacaatag cgcaaaagggt ggagcaaaagg gtggattaaa aaacaacaa aaacaacca
1321 ccacctcaa ccaagaagaa caaaaaaca aaaatatcaa ttcaaagat ataggagatg
1381 caggagaata tgctgcttct atgcttttta ctaaagatc aactaggtat ttatctaata
1441 gaagaaaact agatgccaat ttttaacta aaggttttta tcatactata cctgattttt
1501 tagtaacctt aatgattac cctactttag tagaggttaa aaatatcaa gatcaagctt
1561 taacagaaca aataagcttt gaactaaaac tggctagaga atatgaactt gattatttat
1621 ttatatgcaa tcaactatac aaattggtag ataataaac caatctaaaa gtatttaata
1681 aagacaatga aaaacacaaa ggatcaagaa gtggctttat ctaccacaga catttccaca
1741 gaagcataaa aacaatattt aaagaaatgt atttacacca tatcaaagga gtagcaccta
1801 ataaaatcat gataaaaaga ttaaatttaa ataatcctgc taatatagaa gaagaattaa
1861 acaaaaaca acaaatataa aaaaactaaa ggagcaaca tgaaaacatt agaagatac
1921 aaaaattaa attttaaaat aaaaatggaa attcaaaaac aattatttga ttttattagt
1981 aataatgact tagaaaatgt taaaatctt ttaaagatt at

```

//

```

LOCUS      ECFEEMN_10          1875 bp    DNA      linear      12-APR-2021
DEFINITION Campylobacter species strain strain.
ACCESSION
VERSION
KEYWORDS   .
SOURCE     Campylobacter species
  ORGANISM Campylobacter species
            Unclassified.
COMMENT    Annotated using prokka 1.14.6 from
            https://github.com/tseemann/prokka.
FEATURES   Location/Qualifiers
  source    1..1875
            /organism="Campylobacter species"
            /mol_type="genomic DNA"
            /strain="strain"
  gene      7..630
            /locus_tag="ECFEEMN_00060"
  CDS       7..630
            /locus_tag="ECFEEMN_00060"
            /inference="ab initio prediction:Prodigal:002006"
            /codon_start=1

```

```

/transl_table=11
/product="hypothetical protein"
/protein_id="Prokka:ECFEEEMN_00060"
/translation="MSIKGYPIFAIPKKNKIQFALAKIQASPLAKIEYDRIRWEEIGG
KLKAAQRRRREKSKEKAKMLLYLENENKKDKVSDQEVHLYKHNGIWPKITPKPRSSDY
ILEDGEIILNIKQRAMEIKNTLNGGYNSISIKTKDKLTRYDLDGKPHYEKTSKKIIDT
PHKIEYTKHINPQDTTYRMSQGAVEPISHKDLDIVENYLKRQNNIEI"
gene 620..1006
/locus_tag="ECFEEEMN_00061"
CDS 620..1006
/locus_tag="ECFEEEMN_00061"
/inference="ab initio prediction:Prodigal:002006"
/codon_start=1
/transl_table=11
/product="hypothetical protein"
/protein_id="Prokka:ECFEEEMN_00061"
/translation="MKFENLKHGSLFKREFYLDVKIDLRNDFVYVSITMNKNTLEIF
FKSEKKDIQDLQIIFYDYKLLHPKSYCKNFNQLANFIDLIRNNWDDITGYIEKEEEM
LISYFDNDLEYITLTCKYFNIDFID"
gene 1021..1578
/locus_tag="ECFEEEMN_00062"
CDS 1021..1578
/locus_tag="ECFEEEMN_00062"
/inference="ab initio prediction:Prodigal:002006"
/inference="similar to AA sequence:RefSeq:CKG87579.1"
/codon_start=1
/transl_table=11
/product="hypothetical protein"
/protein_id="Prokka:ECFEEEMN_00062"
/translation="MTREQAELIIKEEKLIDTDWYPSYKHSGEFHLTMMWFSDNNKYE
TFYVGERGSVELEYSFDSEKEAIDKMLQMNYEQKKYDGKDIKEYLTKEVALRIIKEEN
LEVIWYDEALKPMRAGIKHDKQRDKYISFITNAKAEIIIEYRSIEFDGDRYSETFKEML
NDENIALYALINRARMIKQNRISFT"

```

ORIGIN

```

1 ataggagtga gtataaaagg ctatcctata tttgctatac ctaaaaagaa taagattcaa
61 tttgcttttag ctaaaataca agctagtcct cttgctaaga ttgagtatga taggataaga
121 tgggaagaga taggaggtaa attaaaagct gcacaaagaa ggagaagaga aaaaagtaaa
181 gagaaagcaa aaatgctttt atatttgtaa aatgaaaata aaaaagataa agtaagtgat
241 caagaagttc atctttataa acataatgga atatggccta aaattactcc aaaacctaga
301 agttctgatt atattcttga agatggagag attattttaa acatcaaaca aagagccatg
361 gaaataaaaa atacttttaa tggagggtat aatagttatt ctataaagac aaaagataaa
421 cttaccagat atgatttaga tggtaaacca cattatgaga agacatcaaa gaaaataatt
481 gatacacctc ataaaataga atatactaaa catataaatc ctcaagatac aacaaagtat
541 agaatgtcac agggagcagt agagccaata tctcataaag atttagatat tgtagaaaat
601 tatttaaaaa ggcaaaataa tgaaatttga gaattttaaag catggaagtt tattcaaaag
661 agaattttat cttaaagatg taaaaataga tttaagaaat gacttttatg tttattctat
721 cacaatgaat aaaaacactt tggaaatatt ttttaaatca gagaaaaaag atatacaaga
781 tttgcaaatt attttttatg attataagtt gctacatcca aaatcatatt gtaaaaaattt
841 taatcaatta gaagctaatt ttatagattt gataagaaat aattgggatg atataacagg
901 ctatattgaa aaagaagaag agatgttgat aagcatatat tttgataatg atttagaata
961 tattacttta acttgtaagt attttaatat agattttata gactgaataa aggatagaaa
1021 atgacaagag aacaagcaga attaatcata aaagaagaaa agttgattga tacagattgg
1081 tatccttctt ataaacattc aggagaattt catcttacta tgtggtttga ttctgataat
1141 aataaatatg aaactttcta tgttggagaa aggggcagtg ttgaacttga gtattctttt

```

```

1201 gatagtgaaa aagaagccat tgataaaatg ttgcagatga attatgaaca aaaaaaatac
1261 gatggaaaag acattaaaga atatctaaca aaagaagtag cactaagaat catcaaagaa
1321 gaaaatctag aagtgatttg gtatgatgaa gcacttaaac caatgcgagc aggtatcaaa
1381 cacgataaac aaagagataa atatatttct tttatcacta atgctaaagc agagattata
1441 gaatacagaa gtattgagtt tgatggggat agatacagtg aaacttttaa ggaaatgctt
1501 aacgatgaaa atatagccct ttatgctctt atcaatcgtg ccagaatgat taagcaaaat
1561 aggattagct ttacgtaaact actttcctta taatttaatt taatccttagt gggtttaaaa
1621 acccacaagg cttttcatgg ctagaatttg ctatacccaa aaagaataag attaaatttg
1681 ctttagctaa aatacaagct agtcctcttg ctaagattga gtatgatagg ataagatggg
1741 aagggatagg aggtaaaaga agtaagaaaa ataaaaatga tagagcaaag caaatacaag
1801 cattaaaaaa taatcagcaa aacaacaac aaaattcatt tttacaagaa gttgaacaac
1861 aaaaagaaga ggctg

```

//

LOCUS ECFEEMN\_11 1821 bp DNA linear 12-APR-2021

DEFINITION Campylobacter species strain strain.

ACCESSION

VERSION

KEYWORDS .

SOURCE Campylobacter species

ORGANISM Campylobacter species

Unclassified.

COMMENT Annotated using prokka 1.14.6 from  
<https://github.com/tseemann/prokka>.

FEATURES

Location/Qualifiers

source

1..1821

/organism="Campylobacter species"

/mol\_type="genomic DNA"

/strain="strain"

gene

67..321

/locus\_tag="ECFEEMN\_00063"

CDS

67..321

/locus\_tag="ECFEEMN\_00063"

/inference="ab initio prediction:Prodigal:002006"

/inference="similar to AA sequence:RefSeq:CKG86821.1"

/codon\_start=1

/transl\_table=11

/product="hypothetical protein"

/protein\_id="Prokka:ECFEEMN\_00063"

/translation="MLDPLEIEKLSPQEYRVRNYFKFLTATMFFLVITFIILPCLLQ  
AYLFKCYSTGEKRKLSWFIGFVCNAPILIASVYVYENL"

gene

440..931

/locus\_tag="ECFEEMN\_00064"

CDS

440..931

/locus\_tag="ECFEEMN\_00064"

/inference="ab initio prediction:Prodigal:002006"

/inference="similar to AA sequence:RefSeq:CKG86719.1"

/codon\_start=1

/transl\_table=11

/product="hypothetical protein"

/protein\_id="Prokka:ECFEEMN\_00064"

/translation="MGEDITLSIFWGLIGFILACSVIEFYLIASVLIVFSILNYWIK  
INIKEFVKSYFLISFIIFFMAIVIVFYLTLDLETSRGLVLLGPPEIEKLSPQYKARN  
YFDLGGITFIFLVITFFILPCLLQAYLFKCYSTGEKRKLSWFIGFVCNPILMAGVY  
VMY"

ORIGIN

```

1 ttttttacag ctattattat catatTTTTat cttagctatg atcttgaatt ttataaatcg
61 cttgtattgc ttgatcctct agaaattgaa aaattatcac cgcaagaata tagagtgcgt
121 aattatttta aatttttaac ctttgcaact atgttttttt tagtaatcac atttattata
181 cttccttggt tattgcaagc ttatttattt aaatgttata gcacaggaga aaaacgcaaa
241 aaattaagtt ggtttatagg gtttgtgtgt aatgctccta tattaattgc gagtgtgtat
301 gtggtatatg aaaatcttta aagactatca aaaattcact ctttatgggt tggattttaa
361 actttatagt aaagatttta tcactaagct tgatttttaa gataaagctt ataatgtgct
421 ttataataca ggagttttaa tgggagaaga tattacactt tctatTTTTt ggggtttgat
481 aggatttatt cttgcttgta gtgttataga attttatctt atagctctaa gcgttcttat
541 tgtcttttct attttaaatt attggatcaa gattaatata aaagaatttg taaaatctta
601 ttttttaata tcttttatta tcttttttat ggctattggt atcgtatTTT atcttactta
661 tgatcttgaa acttctaggg gacttgtatt acttggtcct ccagaaattg aaaaattatc
721 accacaagaa tataaagcac gtaattattt tgatttttta ggcggtataa cttttatttt
781 tttagtaatc acatttttta tacttccttg tttattacaa gcttatttat ttaaagtcta
841 tagcacagga gaaaaacgca aaaaattaag ttggtttata gggtttgtgt gtaatcctat
901 attaatggcg ggtgtgtatg tgatgtatta aaatctttaa agacttttaa aaaatttaat
961 atatttgata taatatttat ttatcttaa tatttagaga aaaaatgaat agagaattat
1021 ttataacaag acttgcattt ataaacaatg atgaaataaa taaaataaat aaaaattcat
1081 ctattgcata tttaaaagcc ttatatcaat gtgaaaattc catagctgta aattatgatg
1141 aagaagagct tttcacccaa accactgcta taacaactct aggatatggc aatgatttca
1201 caaaaatctt catcctagat aaagaaaacc tcaatgacac ctatcttgat gctagaaaaa
1261 agctttataa atctatcaat actttaaaag aagaaaaaaa tgaaaaaata aaaaatatcc
1321 aagcttatgt aaataaagaa aattccttgc aagacaactt aaataatcaa agctttaata
1381 ctgaggaaaa tgatgttaat ttaattttaa acgaagtatt taacatagag caattttatg
1441 ataaaaatac caataccata gtattaaaga caaataatat aaaaatcata ttcttagata
1501 aagtaaattt acaagatttg caagataatt ctaacaatac ttctttcatc tctatgtcaa
1561 atttaatcca tatttatgag aatcattgtg atatTTTTac gaaagataga agtattttag
1621 atataaaatt tatagaagaa aaatatcaaa tagattttaa aagtttagat acaaaaatct
1681 tcctaaactc caccctcctt acaggctcca ccgaactccc taataatcct ttttactttg
1741 gagaattaga tcaagataat actataaaac aagatatacc cagttattat ttttctccta
1801 aagatgaaag cagtggttta g

```

//

```

LOCUS      ECFEEMN_12                1275 bp    DNA        linear      12-APR-2021
DEFINITION Campylobacter species strain strain.
ACCESSION
VERSION
KEYWORDS
SOURCE     Campylobacter species
  ORGANISM Campylobacter species
            Unclassified.
COMMENT    Annotated using prokka 1.14.6 from
            https://github.com/tseemann/prokka.
FEATURES   Location/Qualifiers
  source   1..1275
            /organism="Campylobacter species"
            /mol_type="genomic DNA"
            /strain="strain"
  gene     112..609
            /locus_tag="ECFEEMN_00065"
  CDS      112..609
            /locus_tag="ECFEEMN_00065"
            /inference="ab initio prediction:Prodigal:002006"
            /inference="similar to AA sequence:RefSeq:CKG86821.1"

```

```

/codon_start=1
/transl_table=11
/product="hypothetical protein"
/protein_id="Prokka:ECFEEEMN_00065"
/translation="MGDSITLSIFVGSLLSIAVITKFYLIASVLIVFSILNYWIKIN
IKEFVKSYFLVYFTIFFTAIVIIIFYLTYGIETSKDLALLSSLEAKELSPQEYRVRNYF
KFLTFATMFFLVITFIILPCLLQAYLFKCYSAGEKRKLSWFIGVFCNIIILIASAYL
MYIFI"
gene      728..1231
          /locus_tag="ECFEEEMN_00066"
CDS      728..1231
          /locus_tag="ECFEEEMN_00066"
          /inference="ab initio prediction:Prodigal:002006"
          /inference="similar to AA sequence:RefSeq:CKG86821.1"
          /codon_start=1
          /transl_table=11
          /product="hypothetical protein"
          /protein_id="Prokka:ECFEEEMN_00066"
          /translation="MGEDITFSIFWGLFGFILAFITNIKFYLTLSVLIVFSILNYWIK
INIKEFVKSYFSIYFIIFFTAIIVIIIFYLTYGIETSKDLALLSSLEAKELSPQEKARN
YFGFLTCMTMFFLVITFIILPCLLQAYLFKRYSTEERKLSWFIGFLCNIIILIASA
YLMYIFI"

```

ORIGIN

```

1 caaaaattca ctccttatgg tttggatttt agactttata gtaaagattt tatcactaaa
61 cttgatttta agataaagc ttataatgtg ctttataata caggagttta aatgggagat
121 agtattacgc tttctatfff tgtaggttca ttgctatcca ttgctgttat cacaaaattt
181 tatcttatag ctttatctgt tcttattgtc ttttctatff taaattattg gattaagatt
241 aatataaaaag aatttgtaaa atcttatttt ttagtatatt ttactatctt ttttacagct
301 attgttatca tattttatct tacctatggg attgaaactt ctaaggatct tgcattgctt
361 agctctctag aagctaaaga attatcaccg caagaatata gagtgcgtaa ttattttaaa
421 tttttaacct ttgcaactat gtttttttta gtaatcacat ttattatact cccttgttta
481 ttgcaagctt atttatftaa atgttatagc gcaggagaaa aacgcaaaaa attaagttgg
541 tttatagggt ttgtgtgcaa tattattata ttaattgcaa gtgcatatff gatgtatata
601 tttattftaa gactatcaaa aattcactcc ttatggtttg gattttagac tttgtagtaa
661 agattttatc actaagcttg atftftaaaga taaagcttat aatgtgctff atgatacagg
721 agftftaaatg ggagaagata ttacattttc tattftfttg ggtttatttg gatttattct
781 tgctftftact aatataaaaat tttatcttac cactfttaagt gttcttattg tctftftctat
841 tftftaattat tggattfaaa ttaatataaa agaatttgta aaatcttatt tftftaatata
901 tftftattatc tftftftacag ctattgttat catattfttat cttacctatg gtattgaaac
961 tftftaaggat cttgcattgc ttagctctct agaagctaaa gaattatcac cacagaata
1021 taaagcacgt aattattfttg gattftftgac ttgtatgact atgtftftft tagtaatcac
1081 atftftattata cttccttgftt tattgcaagc ttattftatt aaacgtata gcacagaaga
1141 aaaacgcaaa aaattaagtt ggtfttatagg gttftftatgc aatattatta tattaattgc
1201 aagtgcatat ttgatgtata tftftattfta aagactatca aaaattcact ctttatggft
1261 tggattfttag actft

```

//

```

LOCUS      ECFEEEMN_13          1215 bp    DNA      linear      12-APR-2021
DEFINITION Campylobacter species strain strain.
ACCESSION
VERSION
KEYWORDS
SOURCE     .
ORGANISM   Campylobacter species
           Unclassified.

```



COMMENT Annotated using prokka 1.14.6 from  
<https://github.com/tseemann/prokka>.

FEATURES Location/Qualifiers

source 1..1215  
 /organism="Campylobacter species"  
 /mol\_type="genomic DNA"  
 /strain="strain"

gene complement(176..940)  
 /gene="trxB\_3"  
 /locus\_tag="ECFEEEMN\_00067"

CDS complement(176..940)  
 /gene="trxB\_3"  
 /locus\_tag="ECFEEEMN\_00067"  
 /inference="ab initio prediction:Prodigal:002006"  
 /inference="similar to AA sequence:RefSeq:CKG86288.1"  
 /codon\_start=1  
 /transl\_table=11  
 /product="thioredoxin reductase"  
 /protein\_id="Prokka:ECFEEEMN\_00067"  
 /translation="MGEWELAAGILGDKLGFAGGGGLWKTGFTTRAYQALFLAAQLG  
 HQPSLEHQLTTYSSVALAGGGHKNPLREKMLKDFAKNPPYDEFGLPFLDELIGVDW  
 VIDLNEYQFAYDGGSVKALDEKVRQGLKDPDIDSTPESRKEFDEEANAYTFGNR  
 MNFSSDIRDSRSKESARLFDDLILHAKLAALTPPQGYPNAPYYFSPEQLEDFYKRQV  
 LDAKLDPRIPAIYRYNFPRELRAKILKFGEEGIKD"

ORIGIN

```

1 cattgctttt tgccgtaaat aatattttat ttgtatcttt ttctacattt aatattgagc
61 catctgggtg ataaatctca taagtatcac tcatctttta tcctttcttt atttaaccta
121 tatgcaaacc atttttcata atgatagtag tggctagcct gcctatgcaa ttactttaat
181 ctttaatgcc attttcttcg ccaaatttga gtatcttagc tctaagttcc cttgggaaat
241 tatactata aatagcaggg attcttgat caagtttagc gtctaaaact tgtcttttgt
301 aaaaatctt taattgttca ggactaaaat aataaggtgc attaggataa cttgaggag
361 gagtgagggc tgcgagtttg gcatgaagta tcaaaaggtc atcaaataat ctagccgatt
421 ctttacttct actatcgca atacagagg aaaaattcat tctattacca aaagtataag
481 cattagcttc tcatcgaat tctttcctgc tctctggagt agagtctata tctcttggat
541 cttttaattt acctgtctt acttttctcat ctaaagcctt aacactaccg ccatcaccat
601 cataagcaaa ttgatattca ttcaaatcaa tcaccaatc cactcctata agttcatcta
661 agaaaggtag cattccaaat tcatcataag gaggattttt agcaaagtct tttagcattt
721 tctctcttaa aggattttta tgtcctccac ctgctaaggc tacagaagat gagtaagtag
781 tgagttggtg ttctaaagaa ggttgatgtc ctagttgtgc tgctaaaaat aatgcttgat
841 aagccctagt agtaaactct gttttccata atcctcctcc accttttgca aagcctaatt
901 tatctcctaa aattcctgct gctaattccc attcaccat aaataaatat ccatcactta
961 aatgagctaa gcctctattg gcttctactt ctttgtaaag ttctttatag tctttattga
1021 ttaaatttcc tttttcatct acattacaat aagcatcata aggtatatct ataacagtgc
1081 ttcttatacc acttcttata attaaatatt tatactttc tcttttagtt tttaaagatt
1141 tataataagc tttttctgct ttagtccaag gagctatagc tcctttgata ggatctttta
1201 aatatatgct ttgcc

```

//

LOCUS ECFEEEMN\_14 1183 bp DNA linear 12-APR-2021

DEFINITION Campylobacter species strain strain.

ACCESSION

VERSION

KEYWORDS .

SOURCE Campylobacter species

ORGANISM Campylobacter species

```

Unclassified.
COMMENT      Annotated using prokka 1.14.6 from
              https://github.com/tseemann/prokka.
FEATURES     Location/Qualifiers
   source     1..1183
              /organism="Campylobacter species"
              /mol_type="genomic DNA"
              /strain="strain"
   gene       complement(159..572)
              /locus_tag="ECFEEEMN_00068"
   CDS        complement(159..572)
              /locus_tag="ECFEEEMN_00068"
              /inference="ab initio prediction:Prodigal:002006"
              /inference="similar to AA sequence:RefSeq:AOH52023.1"
              /codon_start=1
              /transl_table=11
              /product="immunity protein 70"
              /protein_id="Prokka:ECFEEEMN_00068"
              /translation="MVGFSIDNLWYEIGSGDFLHAFFSNVAYHLEKGNWGSRFPILMN
EVYQGKLNFSKASLALNELENIQKEFKNFTPQIWDIENLSLTPPWGDNISSDITDL
SNYFVTSDGNDFIELFKVLQLADNEKANLTIKSF"
   gene       complement(587..1183)
              /locus_tag="ECFEEEMN_00069"
   CDS        complement(587..1183)
              /locus_tag="ECFEEEMN_00069"
              /inference="ab initio prediction:Prodigal:002006"
              /codon_start=1
              /transl_table=11
              /product="hypothetical protein"
              /protein_id="Prokka:ECFEEEMN_00069"
              /translation="MSIKGYPIFAIPKKNKIQFALAKIQASPLAKIEYDRIRWEGIES
KEEAKMLLYLENENKNSKIKQISISNIPKKPHWRESEEDISKLYDYEKQKSFLNGN
EVPYGTKHSVRPDLYKNGSSIEIKNYNLDKTSSANLINIITKQYQQLQHLPPKTEQ
IFIIDSRGQNISKEIQEKIKQIRIKLNCDILIQFKTK"

ORIGIN
   1 tcttttttta gccatgaaaa gccttgtggg ttttaagtat gttttctagt tgtttatcct
  61 tggcataaag aagcttttct tctaaagagc aatcaaaaatt taaaggaaaag ggtttttaggg
 121 tgtttttgct tagaaaat tcccaaagta taattat tttt aaaaactttt aatggtaagg
 181 ttagcttttt cattgtcagc tagttgtaag acctttttaa agagttctat aaaatcatta
 241 ccatcgcttg ttacaaaata atttgatagg tctgtaatat cactactgat attatcacc
 301 caagtgggcg taagagataa gttttcaata tcccaaatta tttgttttgg ggtaaaat t
 361 ttaaattcct tttgtatatt ctctagttca tttaacgcta aagaagcttt tgaaaaat t
 421 aatttacctt gatatacttc attcattaat ataggggaatc tacttcccca gtttcctttt
 481 tcaagatgat aagccacatt gctaaaaaat gcatgtaaaa aatcaccact gcctatttca
 541 taccaaagat tatctatact aaaaccacc attattcttc ctaaatttac ttagttttta
 601 attgaataag tatatcacia ttttaattta tgcgaat ttt ttgttttatt ttttcttgta
 661 tttctttaga tatat tttgt cctctagagt ctataatgaa gatttgttca gtttttggtg
 721 gcaaatggtg caatctttgt tgatattgtt tggtaataat attaattaaa ttgtttgcac
 781 tggatgtttt atcaagatta tagtttttaa tttcaatgct agaaccattt ttgtataagt
 841 ctggacgaac agaatgtttt gttccgtatg gaacttcatt gccattaaga aaagatttct
 901 gtttttcata atcatagtat aactttgata tatcttcttc agattctcgc caatgaggtt
 961 ttttaggtat gtttgatata gatatttgtt ttat tttgct atcg tttttta ttttcattt
1021 ccaaatataa aagcattttt gcttcttctt tgctttctat cccttcccat cttatcctat
1081 cactactcaat cttagcaaga ggactagctt gtat ttttagc taaagcaaat tgaatcctat

```

```

1141 tcttttttagg tatagcaaat ataggatagc cttttatact cac
//
LOCUS      ECFEEMN_15                1123 bp    DNA        linear      12-APR-2021
DEFINITION Campylobacter species strain strain.
ACCESSION
VERSION
KEYWORDS   .
SOURCE     Campylobacter species
  ORGANISM Campylobacter species
            Unclassified.
COMMENT    Annotated using prokka 1.14.6 from
            https://github.com/tseemann/prokka.
FEATURES   Location/Qualifiers
  source   1..1123
            /organism="Campylobacter species"
            /mol_type="genomic DNA"
            /strain="strain"
  gene     234..866
            /locus_tag="ECFEEMN_00070"
  CDS      234..866
            /locus_tag="ECFEEMN_00070"
            /inference="ab initio prediction:Prodigal:002006"
            /codon_start=1
            /transl_table=11
            /product="hypothetical protein"
            /protein_id="Prokka:ECFEEMN_00070"
            /translation="MSEINNTEIKEQDTQDEIIEWEGKKEIPSFLLYWITYIVLLCFM
            LYLLPRTFDNTKNFKWVFFIMFLLGIYIFAREIYKMANIKRIYVTKELVVEYYIKN
            DLVFPLGTFVYYRSLPFLGTPGDMVIYTFGDKVKEYLEPGLFSAGDDPTKGCCEKIN
            AIIKPHVMPYLLSLSDEEFEKIISHVSGFSEIDTTFLKEAMELRKEKKDE"
  gene     859..1011
            /locus_tag="ECFEEMN_00071"
  CDS      859..1011
            /locus_tag="ECFEEMN_00071"
            /inference="ab initio prediction:Prodigal:002006"
            /codon_start=1
            /transl_table=11
            /product="hypothetical protein"
            /protein_id="Prokka:ECFEEMN_00071"
            /translation="MNENIYGSLEFYSKETQSTPSDKRDLGVFGDVAPYALGITESFT
            TKAFKG"
ORIGIN
  1  tgcaaacaaa gatagaagag caatattctt tagaatcaga aaattctact tttgactttc
  61  aaacagattg tgaagtaaaa gcaggcaatc aaatcctcca tcaagtaggt gataactcaa
  121  ttgttaccaa gaaagattgt gttatcatta aagcaggtgg agtagaagtg attatagact
  181  ctaatggact tgtgggttaa ggtggagaag taaaagcaga gtaaaggata aaaatgagtg
  241  aaataaacia taacacagaa atcaaagaac aagacactca agatgaaatc atttgggaag
  301  gaaaaaagga aataccttgc tttttgcttt attggataac atatattgtg cttttatggt
  361  ttatgcttta tttgcttcct aggacatttg acaatactaa gaattttaaa tggttttgtg
  421  tttttattat gtttctttta ggcatatata tatttgcacg agagatctat aaaatggcaa
  481  atattaaag aatttatgtc acaaaagaaa aacttgtggt tgagtattat attaaaaatg
  541  atttggtttt tccttttagga actttttttg tatattatcg tagtttgcca tttgggctta
  601  ctccaggaga tatggtgata tacacctttg gagataaggt caaagaatac cttgaacctg
  661  gtttattcag tgctggcgat gatccaacaa aaggttgttg tgaaaaaatt aatgccatta

```

```
721 taaaacctca tgtaatgcct tatttattaa gcttaagtga tgaagaattt gaaaaaatca
781 tttcacatgt aagcggtttt agcgaattg atactacttt ccttaaagaa gcaatggaac
841 tcagaaaaga gaaaaaagat gaatgaaaat atttatggaa gtttagagtt ttattctaaa
901 gaaactcaaa gcactcctag tgataaaaga gatttaggag tatttggaga tgttgctcct
961 tatgctttag gcattacaga aagttttact actaaggctt ttaaggggta agcaatgaat
1021 aattctactt tactttggaa aagtaagaga aaaattattc cttttagttt gtttttttgc
1081 tctctttatt ttatattagc tttttttctg tgttggtttt gtt
```

//

LOCUS ECFEEEMN\_16 1091 bp DNA linear 12-APR-2021

DEFINITION Campylobacter species strain strain.

ACCESSION

VERSION

KEYWORDS .

SOURCE Campylobacter species

ORGANISM Campylobacter species

Unclassified.

COMMENT Annotated using prokka 1.14.6 from  
<https://github.com/tseemann/prokka>.

FEATURES

Location/Qualifiers

source

1..1091

/organism="Campylobacter species"

/mol\_type="genomic DNA"

/strain="strain"

gene

complement(551..931)

/locus\_tag="ECFEEEMN\_00072"

CDS

complement(551..931)

/locus\_tag="ECFEEEMN\_00072"

/inference="ab initio prediction:Prodigal:002006"

/inference="similar to AA sequence:RefSeq:CKG87598.1"

/codon\_start=1

/transl\_table=11

/product="methyltransferase small"

/protein\_id="Prokka:ECFEEEMN\_00072"

/translation="MQMDKYYKAKGYKRISLNKVKGLDDKIHHEMGIYYNPDKNPKY  
IIAEAKFGTSKLDKTKQMSDEWLIKNLKQLKDNVGEKQAKEIKLLNSNEVRKDLF  
HVDEGGKETIDYLDKANKIKPKG"

ORIGIN

```
1 ctagaggatc tcttaatcct gtatgttttt tcatatattg atgtaaaaac tcaatatict
61 tagtagctac aaattcctta ataagctcgt gttcctttgcg aatacatttg cgttctaaat
121 ttaaattcct acccttagat cctataaaat gtaaaaacca atctctattg agaatatctc
181 ttctttttct ctcatcttct tctattaatt ctaatacaca agcactatcc atatctagta
241 atactctaac acaaagttca agagcatttc catcaaacca gctaatatcc aatccttttt
301 ctaaacgatt tttttctttt tctagtatgt atgcttctaa atctttttta actatgtcta
361 tatcatcacc acgagagtat ttatccatag caagatgaaa ttttctatct tctatacaaa
421 aaagacaagt ttctctttgt ccaaaaggaa gctctaaaag ttttttttcg gattccttga
481 tatcttcttc actttctatt atctctttag taaaatacgc ttcattctta ctagtatccc
541 ttaccatttt ctatcctttg ggttttatth tatttgcattc tttatctaaa taatcaatag
601 tttctttacc tccttcatca acatgaaata aatcttttct gacttcattg ctattaagaa
661 gtttttttat ttctttggcc tgtttttctc ctacattatc ttttaagctgt tttagtttat
721 tctttattaa ccattcatca ctcatcttgc tagtttttct atctaatttg cttgtttccaa
781 acttagcttc tgcgatgata ttttttgggt ttttatctgg attataataa attccatcca
841 tttcatgatg aattttatca tcaagccctt tgactttatt taaactaatt cttttatagc
901 ctttagcttt gtaatattha tccatttgca tttcagcata attacctttt tgctgattat
961 tttttggggt ttttaaacca ctaagattaa attaaatcat aaggaaagta tttgtattgt
```

1021 ttaaattctt ctttatctaa attcattagt tttacaattg ctgcaccttc aagatcccaa  
1081 gtatctagag g

//

LOCUS ECFEEEMN\_17 980 bp DNA linear 12-APR-2021

DEFINITION Campylobacter species strain strain.

ACCESSION

VERSION

KEYWORDS .

SOURCE Campylobacter species

ORGANISM Campylobacter species

Unclassified.

COMMENT Annotated using prokka 1.14.6 from  
<https://github.com/tseemann/prokka>.

FEATURES Location/Qualifiers

source

1..980

/organism="Campylobacter species"

/mol\_type="genomic DNA"

/strain="strain"

gene

complement(12..641)

/locus\_tag="ECFEEEMN\_00073"

CDS

complement(12..641)

/locus\_tag="ECFEEEMN\_00073"

/inference="ab initio prediction:Prodigal:002006"

/codon\_start=1

/transl\_table=11

/product="hypothetical protein"

/protein\_id="Prokka:ECFEEEMN\_00073"

/translation="MSFELIFLFFCSSWFVVLVLSAAIISKVFALSVPFSLSLAC\*G

F\*RLSIISLCFSTLS\*FLCKNSSLPRLSFSFVLGFFRNSSIFFNFSSSVITSFKLS

SSLSKILVISSAFFPQAFLLIPIACCILSSSVNFSFPFKAFKSSGLCKAKLGFFILAM

LL\*KVKSIFFPFFLKSVTTKPLSSKGTGSKCNFSFLSKDINLGIKT"

ORIGIN

1 aaaaaaggaa tttatgtttt aataccaaga ttaatatctt tagataaaaa cgaaaaatta  
61 cactttgatc ctgtgccttt agaagataag ggctttgtgg ttactgattt tagaaaagga  
121 aaaaaggag aaaaaatat agatttaacc tttcaaagaa gcatagctaa aataaaaaac  
181 cctaatttag ctttgcaaag tcctgaagat tttttaaag ctttgaatgg gaatgaaaaa  
241 tttacagaag atgataaaat acaacaagcg atgggtatta aaaaagcttg tggaaaaaaa  
301 gcagatgaaa tgactaaaat cttgcttaa gatgatgaaa gttttaaaga tgttattaca  
361 gatgaagaaa aattaaagaa aaaaatcgaa gaattacgaa aaaaaccaa acaaatgaa  
421 aactaagcc tactaggcag acttgaattt ttacaaagaa atcaagataa agttgaaaaa  
481 cataagata ttattgaca tcttcaaac cctcaacaag ctagtgataa tgaaaaagat  
541 ggtactgata atgcaaatc tttagatata atggcagcag ataacaccac cacctcaaac  
601 caagaagaac aaaaaaaca aatatcaat tcaaaagaca taggagatgc aggagaatat  
661 gctgtctcta tgctttttac taaaagatca actaggtatt tatccaatag aagaaaacta  
721 gatgctaatt ttaatactaa aggttttaat catactatac ctgatttttt agtaacctta  
781 aatgattacc ctactttagt agaggttaaa aatatccaag atcaagcttt aacagaacaa  
841 ataagctttg aattaaact ggctagagaa tatgaacttg attattttatt tatatgcaat  
901 cactatacaa aattggtaga taatataacc aatctaaaag tatttaataa agacaatgaa  
961 aacacaaag gatcaagaag

//

LOCUS ECFEEEMN\_18 965 bp DNA linear 12-APR-2021

DEFINITION Campylobacter species strain strain.

ACCESSION

VERSION

KEYWORDS .

SOURCE Campylobacter species

ORGANISM Campylobacter species  
Unclassified.

COMMENT Annotated using prokka 1.14.6 from  
<https://github.com/tseemann/prokka>.

FEATURES Location/Qualifiers

source 1..965  
/organism="Campylobacter species"  
/mol\_type="genomic DNA"  
/strain="strain"

gene complement(637..849)  
/locus\_tag="ECFEEEMN\_00074"

CDS complement(637..849)  
/locus\_tag="ECFEEEMN\_00074"  
/inference="ab initio prediction:Prodigal:002006"  
/codon\_start=1  
/transl\_table=11  
/product="hypothetical protein"  
/protein\_id="Prokka:ECFEEEMN\_00074"  
/translation="MTSEQIRKKFNIIYWDDKECKKDKNYIEKHSKLLNDAIKKAKESE  
\*GNRNLLY\*CQFSYQRISKGLYTGKL"

ORIGIN

```

1 tctatatttt tttctccctt ttttcctttt ctaaaatcag taaccacaaa gcccttatct
61 tctaaaggca caggatcaaa gtgtaatttt tcgtttttat ctaaagatat taatcttggg
121 attaaaatat aaattccttc ttgaaagcat ttatcaaaaa aatctgctcc aactttggct
181 atgccattat ttacttttaa gccatcaccg aatcctaatt ctttatntaa acttttatct
241 ttattgtcct tacttgtata aacatcgtaa aagatatcat agtcttttaa atcatctgta
301 tttcttgata aaggtttagc ttctctttct tcataggctt catttagcgt attaataatta
361 ttctcatcaa aataagcatt gattgcatca tttccatggt catcattgct aaataatata
421 tttttacttt tttcctcttt ttctctttct ttttctcttt cttttatntt gttttgcaca
481 gaagttttat taatgcctac agcttcttcc tctatnttgt tttttaattc attttctttt
541 tcaactataa aagaaaatnt atntttatnt tgttctatcc tgattactnt ttttccatnt
601 tgcgnttgta aatgaaaagg actgtaaaaa cataatntac aatnttccag tatataaacc
661 ttttgaaatt ctttgatatg aaaatntgaca tcagtaaagt aaatntctat tccctcattc
721 actntctnta gcctntntta tagcgtcgtt taaaagnttg gagtgtnttt ctatatagnt
781 tttatctntt ttacactctt tgtcatccca atatatatta aactntctnt tgatntgctc
841 tgaagtcatt gtcctgcat cttntaaaag cttntatnt ctagatcctt ttgcaatntc
901 taaaggggtg cttggggtag caaatnttac atntgctcca agntcaatta aaagctgntg
961 aacc

```

//

LOCUS ECFEEEMN\_19 909 bp DNA linear 12-APR-2021

DEFINITION Campylobacter species strain strain.

ACCESSION

VERSION

KEYWORDS .

SOURCE Campylobacter species

ORGANISM Campylobacter species  
Unclassified.

COMMENT Annotated using prokka 1.14.6 from  
<https://github.com/tseemann/prokka>.

FEATURES Location/Qualifiers

source 1..909  
/organism="Campylobacter species"

```

        /mol_type="genomic DNA"
        /strain="strain"
gene     29..160
        /locus_tag="ECFEEEMN_00075"
CDS     29..160
        /locus_tag="ECFEEEMN_00075"
        /inference="ab initio prediction:Prodigal:002006"
        /inference="similar to AA sequence:RefSeq:CKG87616.1"
        /note="Domain of uncharacterised function (DUF1910)"
        /codon_start=1
        /transl_table=11
        /product="hypothetical protein"
        /protein_id="Prokka:ECFEEEMN_00075"
        /translation="MKKHTRLRDLPLDWDLEGAAIVKLMNLDKEEFKSYKYFPYDLI"

```

ORIGIN

```

1 taaggatatt gagtttttac atcaatatat gaaaaaacat acaagattaa gagatcctct
61 agatacttgg gatcttgaag gtgcagcaat tgtaaaacta atgaatttag ataaagaaga
121 atttaaaagc tataaatatt ttccttatga tttaatttaa tcttatttgg ataacagaaa
181 agagtagaga tagacttggc attgtagata aaaaacatag ggaaaaaata gaagaacttc
241 ttgaaaaaaa tagcaatgaa gtcagaaaag atttatttca tgttgatgaa ggaggtaaag
301 aaactattga ttatttagat aaagatgcaa ataaaataaa acccaaagga taaaaaatgc
361 taagagatac taagagagat gaagcgtatt ttacgaaaca tataatagag tgtgaagaag
421 aaattaaaga agatgaaaaa atacttttag agcttccttt tggaaaaaga gaaacttgtc
481 ttttttgtat aacagataga aaaaaatgta ttgctatgga taaatactct cgtggatgatg
541 atataaatct agttaaaaaa gatttagaag cacttatgct attaagacaa aaaaatcgtt
601 tagaattagg tggatttgat actagcgatt atagaggaaa tgctattgaa ctttgtgtta
661 gagtattatt agatatggat agtgcttgtg tattagaatt aatagaagaa gatgagagaa
721 agaaaaaaga tatttttaat agagattggg ttttacattt tatgggttct aagggtaaaa
781 acttaaattt agaacgcaa tgtaattgta aagaacacga gcttattaaa gaattttag
841 ctactaagga tattgagttt ttacatcaat atatgaaaaa acatacaaga ttaagagatc
901 ctctagata

```

//

```

LOCUS      ECFEEEMN_20                897 bp    DNA        linear        12-APR-2021
DEFINITION Campylobacter species strain strain.
ACCESSION
VERSION
KEYWORDS   .
SOURCE     Campylobacter species
  ORGANISM Campylobacter species
            Unclassified.
COMMENT    Annotated using prokka 1.14.6 from
            https://github.com/tseemann/prokka.
FEATURES   Location/Qualifiers
  source   1..897
            /organism="Campylobacter species"
            /mol_type="genomic DNA"
            /strain="strain"
  gene     7..576
            /gene="trxB_4"
            /locus_tag="ECFEEEMN_00076"
  CDS     7..576
            /gene="trxB_4"
            /locus_tag="ECFEEEMN_00076"
            /inference="ab initio prediction:Prodigal:002006"

```

```

/inference="similar to AA sequence:RefSeq:CKG86288.1"
/codon_start=1
/transl_table=11
/product="thioredoxin reductase"
/protein_id="Prokka:ECFEEEMN_00076"
/translation="MHKNPLREQQIKTLAKTLKPDEFGLMPFIDEIMGVDWVIDLNKY
DIASDQFGSMYKALRSDVVEGKIKDPRDIDSTYESRREFDRHRGGYKNGMLQGYGTD
PNDWSEERAQLFNDTLILHAKLAALTPPQGYPNAPYYFTPENLEWYYKRHKLDKLLDP
RIPAIYRYNFPRELRAKILKFGEENGIKE"

```

ORIGIN

```

1 gtaggagtgc ataaaaatcc ttttaagagaa caacaaatta aaaccttagc taagacttta
61 aaacctgatg aatttggtat gcttcctttt atagatgaga ttatggggagt agattggggtg
121 attgatttaa ataaatatga tatagctagt gatcaatttg gaagtatgta taaagcctta
181 agaagtgatg tggttgaggg taagataaaa gatccaaggg ataatagattc tacttatgaa
241 agcagaaggg aatttgatcg ccatagaggt ggatataaaa atggcatgct gcaaggctat
301 ggaaccgata cacctaataa ttggagtga gaaagggcac aactttttta tgatacttta
361 atacttcatg ccaaactcgc agccctcact cctcctcaag gctatcctaa tgcaccttat
421 tattttacc ctgaaaacct agaatgggtat tataaaagac ataagcttga taaactcctt
481 gatccaagaa tccctgcat ttatagatat aatttcccaa gggaacttag agctaagata
541 ctcaaatttg gcgaagaaaa tggcattaaa gaataaagta attacctagg cagattagcc
601 actactataa tcatggaaga tggtttatat atgggataaa ttaagaaagg ataaaagatg
661 agtgataata aagatattta cgagatctat acttctaag gacttatatt agaagttgat
721 aaaaatacaa atcaaattat atttgataaa agagaagatg ggcgtgaagt aggcaaatac
781 acccaagaat attctaaagc tttgtttgaa gccgatagaa ttttaagaac ctctccttat
841 attaattatc aacctaggta tctagatcct gaatttcaca cagggcaaaa atccact

```

//

LOCUS ECFEEEMN\_21 869 bp DNA linear 12-APR-2021

DEFINITION Campylobacter species strain strain.

ACCESSION

VERSION

KEYWORDS .

SOURCE Campylobacter species

ORGANISM Campylobacter species

Unclassified.

COMMENT Annotated using prokka 1.14.6 from  
<https://github.com/tseemann/prokka>.

FEATURES

Location/Qualifiers

source

1..869

/organism="Campylobacter species"

/mol\_type="genomic DNA"

/strain="strain"

gene

68..565

/gene="trxB\_5"

/locus\_tag="ECFEEEMN\_00077"

CDS

68..565

/gene="trxB\_5"

/locus\_tag="ECFEEEMN\_00077"

/inference="ab initio prediction:Prodigal:002006"

/inference="similar to AA sequence:RefSeq:CKG86288.1"

/codon\_start=1

/transl\_table=11

/product="thioredoxin reductase"

/protein\_id="Prokka:ECFEEEMN\_00077"

/translation="MLPFIDEIMGVDWVIDLNKYRLANDEFGLDIYKALRSDVVEGKIK



DPRDIDSTYESRREFDRYRVGYRKGMRQGYETDTPNDWSEERAQLFNDTLILHAKLAA  
LTPPQGYPNAPYYFTPEKLEWYYKRHKLDKLLDPRIPIYRYNFPRELRAKILKFGE  
NGIKE"

ORIGIN

```
1 taaaaatcct ttaagagaac aacaaattaa aaccttagct aagactttaa aacctgatga
61 atttggatg cttcctttta tagatgagat tatgggagta gattgggtga ttgatttaaa
121 taaatataga ttagctaata atgaatttgg ggatatatat aaagccttaa gaagtgatgt
181 agttgagggc aagataaaag atccaagaga tatagattct acttatgaaa gcagaaggga
241 atttgatcgt tatagagttg gatatagaaa gggtagagg caaggttatg aaaccgatac
301 acccaatgat tggagtgaag aaagggcaca actttttaat gatactttaa tacttcatgc
361 caaactcgca gccctcactc ctcctcaagg ctatcctaata gcaccttatt attttacc
421 tgaaaaacta gaatggtatt ataaaagaca taagcttgat aaactccttg atccaagaat
481 ccctgctatt tatagatata atttccaag ggaacttaga gctaagatac tcaaatgtg
541 cgaagaaaat ggcattaaag aataaagtaa ttacataggc agattagcta caactataat
601 catggaagat ggtttatata tgggataaat taagaaagga taaaagatga gtgaaactta
661 tgaattttat acacctaata gtattatatt agatgtagaa aaagaaacga ataaaat
721 attaagtgat gggggagcta aggtaggcaa atacaccaa gaatattcta aagctttg
781 tgaagccgat agaattttaa gaacctctcc ttatattaat tatcaacctg ggtatctaga
841 tcctgaattt cacacagggc aaaaatcca
```

//

LOCUS ECFEEMN\_22 859 bp DNA linear 12-APR-2021

DEFINITION Campylobacter species strain strain.

ACCESSION

VERSION

KEYWORDS .

SOURCE Campylobacter species

ORGANISM Campylobacter species  
Unclassified.

COMMENT Annotated using prokka 1.14.6 from  
<https://github.com/tseemann/prokka>.

FEATURES

source

Location/Qualifiers  
1..859  
/organism="Campylobacter species"  
/mol\_type="genomic DNA"  
/strain="strain"

gene

2..571  
/gene="trxB\_6"  
/locus\_tag="ECFEEMN\_00078"

CDS

2..571  
/gene="trxB\_6"  
/locus\_tag="ECFEEMN\_00078"  
/inference="ab initio prediction:Prodigal:002006"  
/inference="similar to AA sequence:RefSeq:CKG86288.1"  
/codon\_start=1  
/transl\_table=11  
/product="thioredoxin reductase"  
/protein\_id="Prokka:ECFEEMN\_00078"  
/translation="MHKNPLREQQIKTLAKTLKPDEFGLMPFIDEIMGVDWVIDLNVY  
QNFDAWGKIYRALRSDVVEGKIKDPRDVDSTYESRREFDRYMDGYQNGMTINYHVDI  
NNYRSEESAKLFMDSLVLVLEAKLAALTPPQGYPNAPYYFTPERLEWDYKQYQLDKLLDP  
RIPAIYRYNFPRELRAKILKFGEENGIKE"

ORIGIN

```
1 agtgcataaa aatcctttaa gagaacaaca aattaaacc ttagctaaga ctttaaaacc
61 tgatgaattt ggtatgcttc cttttataga tgagattatg ggagtagatt gggtagattga
```

```

121 tttaaatggt tatcaattta attttgatgc atggggaaaa atatatagag ccttaagaag
181 tgatgtagtt gagggcaaga taaaagatcc aagggatgta gattctactt atgaaagcag
241 aaggagttt gatcgttata tggatggata tcaaaatggt atgacaatta attaccatgt
301 agatataaat aattatagaa gcgaagaatc agctaaatta tttatggatt ctttggatt
361 agaggccaaa ctgcagccc tctcctcc acaaggctat cctaatgcac cttattattt
421 taccctgaa agactagaat gggattataa aaattatcaa ttggataaac tccttgatcc
481 aagaatccct gctatttata gatataatcc cccaaggga cttagagcta agatactaaa
541 atttggtgaa gaaaatggca ttaaagaata aagtaattac ataggcagat tagccactac
601 tataatcatg gaagatggtt tataatgggg ataaattaag aaaggataaa agatgagtga
661 aacttatgaa atttatacac ctaatggtgg tatattagat gtggaaaaag aaacgaataa
721 aattttactc tatgatgggg gagctaaggt aggcaaatc acccaagaat attctaaagc
781 tttgtttgaa gccgatagaa ttttaagaac ctctccttat attaattatc aacctaggta
841 tctagatcct gaatttcac

```

//

LOCUS ECFEEMN\_23 835 bp DNA linear 12-APR-2021

DEFINITION Campylobacter species strain strain.

ACCESSION

VERSION

KEYWORDS .

SOURCE Campylobacter species

ORGANISM Campylobacter species  
Unclassified.

COMMENT Annotated using prokka 1.14.6 from  
<https://github.com/tseemann/prokka>.

FEATURES

```

Location/Qualifiers
source 1..835
        /organism="Campylobacter species"
        /mol_type="genomic DNA"
        /strain="strain"
gene 145..639
        /locus_tag="ECFEEMN_00079"
CDS 145..639
        /locus_tag="ECFEEMN_00079"
        /inference="ab initio prediction:Prodigal:002006"
        /inference="similar to AA sequence:RefSeq:CKG87598.1"
        /codon_start=1
        /transl_table=11
        /product="methyltransferase small"
        /protein_id="Prokka:ECFEEMN_00079"
        /translation="MKKKIQELKSINNLSTKQKGNVGEAKMDLYYKQGYKRISLNKV
KGLDDKIHGIDGIYHNPDKNPKYIIAEAKFGKGDLLKKTGKYKQMSDEWITEESRNL
GVVDKKHRKKIEELLKENNNEVRKDLFHVDKKGVS IKELDKNAKTKNLIERIENKGG
YEER"

```

ORIGIN

```

1 ggaggtaaaa gaagtaagaa aaataaaaat gatagagcaa agcaaataca agcattaaaa
61 aataatcagc aaaacaacaa acaaaattca tttttacaag aagttgaaca acaaaaagaa
121 gaggctgaaa aagtttttagc agatatgaaa aaaaagatac aagaattaaa aagtattaat
181 aacttaagca caaaacaaaa aggtaattat ggcgaagcta aatggattt gtattattta
241 aaacaaggct ataaaagaat tagtttaaat aaagtcaaag ggcttgatga taaaattcat
301 catggaattg atggaattta tcataatcca gataaaaacc caaatatat catcgcagaa
361 gctaagtttg gaaaaggtag tttaaaaaaa actggaaaat acaaacaaat gagtgatgaa
421 tggataacag aagagagtag aatagactt ggtgtttag ataaaaaca taggaaaaaa
481 atagaagaac ttcttaagga aaataacaat gaagtcagaa aagattttatt tcatgttgat
541 aaaaaaggca atgtgagtat taaagaatta gataaaaatg caaaaaccaa aaacttaata

```

```
601 gaaaggatag aaaatggtaa gggatacgaa gagagatgaa gcgtatttta cgaacatat
661 aatagagtgt gaaaaaaaaa tcaaagaaga tgaaaaaaga ctcttagaac ttccactagg
721 agatgcaaga agggaaaatt attttttttc tataacagat aaaaaaaaaat gtattgctat
781 ggataaatac tctcgtggcg atgatataaa tccagttaaa aaagatttag aagca
```

//

LOCUS ECFEEMN\_24 730 bp DNA linear 12-APR-2021

DEFINITION Campylobacter species strain strain.

ACCESSION

VERSION

KEYWORDS .

SOURCE Campylobacter species

ORGANISM Campylobacter species

Unclassified.

COMMENT Annotated using prokka 1.14.6 from  
<https://github.com/tseemann/prokka>.

FEATURES Location/Qualifiers

source 1..730  
/organism="Campylobacter species"  
/mol\_type="genomic DNA"  
/strain="strain"

ORIGIN

```
1 aatcaagttc atattctcta gccagtttta attcaaagct tatttgttct gttaaagctt
61 gatcttggat atttttaacc tctactaaag tagggtaatc atttaaggtt actaaaaaat
121 caggtatggg atgattaaaa ccttttagtat taaaattagc atcaagtttt cttctattgg
181 ataaatacct agttgatcct ttagtaaaaa gcatagagac ggcatattct cctgcatctc
241 ctatatcttt tgaattgatg gttttatfff tttgttcttc ttggtttgag gtgggtgttat
301 tcgttttggt atctgaaaag tcatcatcag caccatcttt ttcattatca ctagcttggt
361 gagggttttg aagattgtca ataatatctt tatgttcttt aacctttttt tgatttcttt
421 gtaaaaattc aagtctacct agtaggctta gttttttatt tgttttgggt tctcctcgca
481 attcttcgat ttttttctct aatftttttt catctcfaat aatatctttt aaattttcat
541 catctcfaat aatatctttt aatfttttctt catctcfaat taatattttg gttattttcat
601 ctactttttt tccacaagct tttttaatac ccatcgcttg ttgtatttta tcatcttctg
661 taaatttttc attccattc aaagctttta aaaaatcttc aggactttgc aaagctaaat
721 tagggttttt
```

//

LOCUS ECFEEMN\_25 701 bp DNA linear 12-APR-2021

DEFINITION Campylobacter species strain strain.

ACCESSION

VERSION

KEYWORDS .

SOURCE Campylobacter species

ORGANISM Campylobacter species

Unclassified.

COMMENT Annotated using prokka 1.14.6 from  
<https://github.com/tseemann/prokka>.

FEATURES Location/Qualifiers

source 1..701  
/organism="Campylobacter species"  
/mol\_type="genomic DNA"  
/strain="strain"

ORIGIN

```
1 ctcttacag gctccaccga actccctaat aatccttttt actttggaga attagatcaa
61 gataatacta taaaacaaga tatacccgat tattattttt ctcttaaaga tgaagcagct
121 ggtttaggaa gacttagcat cttttataaa aatgatgaac tttgcttgct taattattct
```

```

181 atattagaca attctttaa tatcaaatta gaatgcttaa gcaaacaag cttagaatac
241 aaagatttaa tttcaaacac tctaaaagaa caaaaaacca cacaagtaga taaaaaaca
301 agcatagcca aacttcacgc tcttttagaa aatcaaaacc tagaatgtat ccatggagg
361 aaagtcatac ttaaatcaaa caaaggaaaa tcctttaa gtagatggtat ccctataatg
421 ctagaaagtg atttatata ctctagtata gtagcttgtc ctcacacat agcaaatgta
481 agttatcctt gtactaagg agtggatatt aaaggctcct tatctcaaaa gaaagtaaat
541 aatgaatttg taatcttaca agaactcatc tcagcttgca ctacagataa aggctttgct
601 ttaaaagtaa gctttactcc aagtaagttt aaatttgatc acagctttga tcctgaggag
661 ggcttaggag aacaaagtaa aatcaaaata gagttaaag a

```

//

LOCUS ECFEEEMN\_26 684 bp DNA linear 12-APR-2021

DEFINITION Campylobacter species strain strain.

ACCESSION

VERSION

KEYWORDS .

SOURCE Campylobacter species

ORGANISM Campylobacter species

Unclassified.

COMMENT Annotated using prokka 1.14.6 from  
<https://github.com/tseemann/prokka>.

FEATURES Location/Qualifiers

source 1..684

/organism="Campylobacter species"

/mol\_type="genomic DNA"

/strain="strain"

gene complement(218..394)

/locus\_tag="ECFEEEMN\_00080"

CDS complement(218..394)

/locus\_tag="ECFEEEMN\_00080"

/inference="ab initio prediction:Prodigal:002006"

/codon\_start=1

/transl\_table=11

/product="hypothetical protein"

/protein\_id="Prokka:ECFEEEMN\_00080"

/translation="MSKKFIA\*VLALNPVMESCKAPINPFISPSIPAANSHSAIKSQP

LCILAIPLLASTSL"

ORIGIN

```

1 ggcaaagcat atatttaaaa gatcctatca aaggagctat agctccttgg actaaagcag
61 aaaaagctta ttataaatct ttaaaaacta aaagagaaag atataaatat ttaattataa
121 gaagtggact tagaagtact gttatagata taccttatga tgcttattgt aatgtagatg
181 aaaaaggaaa ttaaatcaat aaagactata agaactcta taaagaagta gaagctaata
241 gaggtatggc taatatgcat aaaggttggc tctttatggc tgaatgggaa ttagcagcag
301 gaatactagg agatataaaa ggatttatag gaggccttaca actttccatg acaggattta
361 aagcaagaac tcaagcaata aatTTTTTtac tcatacaact aggacatgaa caaggTTTTa
421 aaagtcttta tgattcttat gcatatagag gttaaacaga tggatatacac aaaactctc
481 ttaaagctca aatgctaaaa gactttgcta aaaatcctcc ttatgatgaa tttggaatgc
541 tacctttctt agatgagctt ataggagtgg attgggtgat tgatttgaat gaatatcaat
601 ttgcttatga tggatgatggc ggtagtgta aggctttaga tgagaaagta agacaaggta
661 aattaaaga tccaagagat atag

```

//

LOCUS ECFEEEMN\_27 614 bp DNA linear 12-APR-2021

DEFINITION Campylobacter species strain strain.

ACCESSION

VERSION

```

KEYWORDS      .
SOURCE        Campylobacter species
ORGANISM      Campylobacter species
              Unclassified.
COMMENT       Annotated using prokka 1.14.6 from
              https://github.com/tseemann/prokka.
FEATURES      Location/Qualifiers
              source          1..614
                          /organism="Campylobacter species"
                          /mol_type="genomic DNA"
                          /strain="strain"
ORIGIN
      1 atctagaatg gtattataaa agacataagc ttgataaact cttgatcca agaatccctg
      61 ctatttatag atataatttc ccaagggaac ttagagctaa gatactcaaa tttggcgaag
     121 aaaatgggat taaagaataa agtaattaca taggcagatt agccactact ataatcatgg
     181 aagatggttt atatatggga taaattaaga aaggataaaa atgagtgata ataaagatat
     241 ttacgagatc tatacttcta atggacttat attagaagtt gataaaaaata caaatcaaat
     301 tatatttgat aaaagaaaag atgggcgtga agtaggcaaa tacaccaag aatattctag
     361 agctcttttt gaagcacaca atatcaaca aaactctcc tacaagact atcaacctag
     421 gtatctagat cctgaatttc acacagggca aaaatccact ttgcttgaat ttaaagattg
     481 gcaaagcata tatttaaaag atccattaa aggaagcata gtccttggga ctaaagcaga
     541 aaaagcctat tataactcac taaaactaa aaaagaaaga tataaatatt tagttataag
     601 aagtgtata agaa

//
LOCUS          ECFEEMN_28                586 bp    DNA        linear        12-APR-2021
DEFINITION     Campylobacter species strain strain.
ACCESSION
VERSION
KEYWORDS      .
SOURCE        Campylobacter species
ORGANISM      Campylobacter species
              Unclassified.
COMMENT       Annotated using prokka 1.14.6 from
              https://github.com/tseemann/prokka.
FEATURES      Location/Qualifiers
              source          1..586
                          /organism="Campylobacter species"
                          /mol_type="genomic DNA"
                          /strain="strain"
ORIGIN
      1 aatcaatcac ccaatctact cccataatct catctataaa aggaagcata ccaaattcat
      61 caggttttaa agtcttagct aaggttttaa tttgttgctt tcttaaagga tttttatgca
     121 ctctactaa accacttctt actgcaatat ctgcataacc ataaatagca cccaataaat
     181 taggtttatc tagtatacta cttcctccgc ttaattgtat ataaagtata gttgcttggga
     241 taaatcttgc attaaaacca ttttgagaca tatcgttagc tagatattta taatcaccca
     301 gtattcctgc tgccataacc cattcattat gaaataaact tgatctttaga ttatgtttat
     361 tatcatctac tgttctatat aattcttcat acttaggatc tacatttctt ttttcatcta
     421 cagctcctat agcttcataa ggtatatcta taacaacact tcttatacca cttcttataa
     481 ctaaattatt atattcttct tttttagttt ttagtgagtt ataataagct ttttctgctt
     541 tagtccaagg agctatgctt cttttaatgg gatcttttaa atatat

//
LOCUS          ECFEEMN_29                537 bp    DNA        linear        12-APR-2021
DEFINITION     Campylobacter species strain strain.
ACCESSION

```

```

VERSION
KEYWORDS .
SOURCE Campylobacter species
  ORGANISM Campylobacter species
            Unclassified.
COMMENT Annotated using prokka 1.14.6 from
         https://github.com/tseemann/prokka.
FEATURES Location/Qualifiers
  source 1..537
         /organism="Campylobacter species"
         /mol_type="genomic DNA"
         /strain="strain"

ORIGIN
  1 agaacaacaa attaaaacct tagctaagac tttaaaacct gatgaatttg gtatgcttcc
  61 ttttatagat gagattatgg gagtagattg ggtgattgat ttaaataaat atgatatagc
 121 tagtgatgaa tctggaaaaa tatacaaagc cttagaagt gatgtagttg agggcaagat
 181 aaaagatcca agagatatag attctactta tgaaagcaga agggaatttg atcgccatag
 241 aggtgggtat aaaaatggca tgagggaagg ctatgaaacc gatacaccca atgattggag
 301 cgaagaagaa gcacaacttt ttaatgatac ttaataactt catgccaaac tagcagccct
 361 cactcctcct caaggctatc ctaatgcacc ttattatfff acccctgaaa atctagaatg
 421 gtattataaa agacataagc ttgataaact cttgatcca agaatccctg ctatttatag
 481 atataatttc ccaagggaac ttagagctaa gatactcaa tttggcgaag aaaatgg

//
LOCUS      ECFEEEMN_30                518 bp    DNA        linear      12-APR-2021
DEFINITION Campylobacter species strain strain.
ACCESSION
VERSION
KEYWORDS .
SOURCE      Campylobacter species
  ORGANISM  Campylobacter species
            Unclassified.
COMMENT Annotated using prokka 1.14.6 from
         https://github.com/tseemann/prokka.
FEATURES Location/Qualifiers
  source 1..518
         /organism="Campylobacter species"
         /mol_type="genomic DNA"
         /strain="strain"

ORIGIN
  1 cccttgggaa attatatcta taaatagcag ggattcttgg atcaaggagt ttatcaagct
  61 tatgtctttt ataataccat tctagatttt caggggtaaa ataataaggt gcattaggat
 121 agccttgtgg aggagtgagg gctgaggtt tggcagttaa tatcatagaa tctattctta
 181 attgtgcact ttcttcactc cgatcatttg gaatatcata accataagca tttaccatgc
 241 cgttataata tcctccccta tggcgatcaa attcccttct gctttcataa gtagaatcta
 301 tatctcttgg atctttttatc ttgccctcaa ctacatcact tcttaaggct ttatacatac
 361 ttccaaattc atcgcgagca attctatacc tgttataatc aatcacccaa tctactccca
 421 taatctcatc tataaaagga agcataccaa attcatcagg ttttaaagtc ttagctaagg
 481 ttttaatttg ttgttctctt aaaggatttt tatgcact

//
LOCUS      ECFEEEMN_31                518 bp    DNA        linear      12-APR-2021
DEFINITION Campylobacter species strain strain.
ACCESSION
VERSION
KEYWORDS .

```

SOURCE Campylobacter species  
 ORGANISM Campylobacter species  
 Unclassified.

COMMENT Annotated using prokka 1.14.6 from  
<https://github.com/tseemann/prokka>.

FEATURES Location/Qualifiers  
 source 1..518  
 /organism="Campylobacter species"  
 /mol\_type="genomic DNA"  
 /strain="strain"

ORIGIN  
 1 taagttccct tgggaaatta tatctataaa tagcagggat tcttggatca aggagtttat  
 61 caagcttatg tcttttataa taccattcta gtttttcagg ggtaaaataa taaggtgcat  
 121 taggataacc ttgtggagga gtgagggctg cgagtttggc agttaatatc atagaatcta  
 181 tttttaattg cgcatcattc caatcatttg gaatatcata accataggca ttaatcatgc  
 241 cattagaata accatccata taataatcaa actcccttct gctttcataa gtagaatcta  
 301 tatcccttgg atcttttatc ttgccctcaa ctacatcact tcttaaggct ttatatatat  
 361 ccccaaattc atcttcagaa atttgatatt cgttataatc aatcacccaa tctactccca  
 421 taatctcatc tataaaagga agcataccaa attcacagc ttttaaagtc ttagctaagg  
 481 ttttaatttg ttgttctctt aaaggatttt tatgcact

//

LOCUS ECFEEEMN\_32 514 bp DNA linear 12-APR-2021

DEFINITION Campylobacter species strain strain.

ACCESSION

VERSION

KEYWORDS .

SOURCE Campylobacter species  
 ORGANISM Campylobacter species  
 Unclassified.

COMMENT Annotated using prokka 1.14.6 from  
<https://github.com/tseemann/prokka>.

FEATURES Location/Qualifiers  
 source 1..514  
 /organism="Campylobacter species"  
 /mol\_type="genomic DNA"  
 /strain="strain"

gene complement(231..380)  
 /locus\_tag="ECFEEEMN\_00081"

CDS complement(231..380)  
 /locus\_tag="ECFEEEMN\_00081"  
 /inference="ab initio prediction:Prodigal:002006"  
 /codon\_start=1  
 /transl\_table=11  
 /product="hypothetical protein"  
 /protein\_id="Prokka:ECFEEEMN\_00081"  
 /translation="MALILSKQSFVGS SPSLNKPGSRYS LTLSPKVYITISP GFDMDG  
 SDELR"

ORIGIN  
 1 cttttatggt ttgcgcttta tttgtttcct agattattta atcctagcaa agaaatagat  
 61 tataaatggt ttatagtttt ttttacattt cttttagtta tatatgcact tgcacaaaag  
 121 atctataaaa tggcaaatat taaaagaatt tatgtcacia aagaaaaact tgtggttgag  
 181 tattatatca aaaatgattt ggtttttcct ttaggaactt tttttgtata ttatcgtagt  
 241 tcgtcacttc catccatc aaatccagga gatatagtga tatacacctt cggagataaa  
 301 gtcaaagaat accttgaacc tggtttattc agtgatggcg atgatccaac aaaagattgt

```
361 ttgaaagaa ttaatgcat tataaagcct catgtaatgc cttatttatt aagcttaagt
421 gatgaagaat ttgaaaaaat catttcacat gtaagcggtt ataacgaaat tggtagcact
481 ttccttaaag aagcaatgga actcagaaaa gaga
```

//

LOCUS ECFEEEMN\_33 507 bp DNA linear 12-APR-2021

DEFINITION Campylobacter species strain strain.

ACCESSION

VERSION

KEYWORDS .

SOURCE Campylobacter species

ORGANISM Campylobacter species

Unclassified.

COMMENT Annotated using prokka 1.14.6 from  
<https://github.com/tseemann/prokka>.

FEATURES

Location/Qualifiers

source

1..507

/organism="Campylobacter species"

/mol\_type="genomic DNA"

/strain="strain"

gene

complement(301..441)

/locus\_tag="ECFEEEMN\_00082"

CDS

complement(301..441)

/locus\_tag="ECFEEEMN\_00082"

/inference="ab initio prediction:Prodigal:002006"

/inference="similar to AA sequence:RefSeq:CKG86746.1"

/codon\_start=1

/transl\_table=11

/product="hypothetical protein"

/protein\_id="Prokka:ECFEEEMN\_00082"

/translation="MWYMKIFKDYQKFTPYGLDFRLYSKDFIAKLDFKDKAYNVLYNT  
GV"

ORIGIN

```
1 cgctttatat tcttgtggtg acaattcttt agcttctaga gagctaagca atgcaagatc
61 cttagaagtt tcaataccat aggtaagata aaatatgata acaatagctg taaaaaagat
121 aataaaaagat attaaaaaat aagattttac aaattctttt atattaatct tgatccaata
181 atttaaaata gaaaagacaa taagaacgct taaagtggta agataaaatt ttatattagt
241 aaaagcaaga ataaatccaa ataaaccca aaaaatagaa aatgtaatat cttctcccat
301 ttaaactcct gtattataaa gcacattata agctttatct ttaaaatcaa gtttggcaat
361 aaaatcttta ctataaagtc taaaatccaa accataagga gtgaattttt gatagtcttt
421 aaagattttc atataccaca tacacactcg caattaatat aggagcatta cacacaaacc
481 ctataaacca acttaatttt ttgcggt
```

//

>>BfR-CA-15863\_min\_cov\_30 putative plasmid location

LOCUS CIKGLNE\_1 5012 bp DNA linear 12-APR-2021

DEFINITION Campylobacter species strain strain.

ACCESSION

VERSION

KEYWORDS .

SOURCE Campylobacter species

ORGANISM Campylobacter species

Unclassified.

COMMENT Annotated using prokka 1.14.6 from



```

https://github.com/tseemann/prokka.
FEATURES             Location/Qualifiers
    source            1..5012
                     /organism="Campylobacter species"
                     /mol_type="genomic DNA"
                     /strain="strain"
    gene              complement(474..1034)
                     /locus_tag="CIKGKLE_00001"
    CDS                complement(474..1034)
                     /locus_tag="CIKGKLE_00001"
                     /inference="ab initio prediction:Prodigal:002006"
                     /codon_start=1
                     /transl_table=11
                     /product="hypothetical protein"
                     /protein_id="Prokka:CIKGKLE_00001"
                     /translation="MTYILLIIISTILSYLILKFIYKIIIFKSTKSVSKFLVFLGSIG
LIIFYYPYSYYLEPSYWQFRNMCKLNELPNNEEKYNKILGYFDKKGIDDFRHVKK
YGSIEMWLYIYDDTYKTPSNFQEKIEMDNIALKTKNMQMSLHKIVDMHISPYWNTRR
YVLEGNENMNFIEDELACGNLYQ"
    gene              complement(1261..2034)
                     /locus_tag="CIKGKLE_00002"
    CDS                complement(1261..2034)
                     /locus_tag="CIKGKLE_00002"
                     /inference="ab initio prediction:Prodigal:002006"
                     /inference="similar to AA sequence:RefSeq:AJK71138.1"
                     /codon_start=1
                     /transl_table=11
                     /product="glutamyl-tRNA amidotransferase"
                     /protein_id="Prokka:CIKGKLE_00002"
                     /translation="MKEINEEKALSLLLDSNFDGLKNNKIIDYSLELLLLSYRLSKI
SSMDTSNINQLRETLINKILDITAKLSMCKEYDEKEIIFKCYCLCVFIDESLMKNELF
INFWAHNTLTVRLFDETLGGNNFYDIASSWINNPFKFKDFLEFIYAACLILGYKGKYNE
AKDRDEKIIHFCNNIATSLRPVYKTEEELAFNKAYKIGLEENIWQKFIRLYFKKLIII
VPVLIVLGVLSFAIFNLETNNLKVDNNSVLIKNLTHIE"
    gene              complement(2031..2612)
                     /locus_tag="CIKGKLE_00003"
    CDS                complement(2031..2612)
                     /locus_tag="CIKGKLE_00003"
                     /inference="ab initio prediction:Prodigal:002006"
                     /inference="similar to AA sequence:RefSeq:AJK71139.1"
                     /codon_start=1
                     /transl_table=11
                     /product="type VI secretion protein"
                     /protein_id="Prokka:CIKGKLE_00003"
                     /translation="MSMSIKIHPEFLYEKFLFQGELAAFSNEESFLDFIPYKHDNLY
NTFLNMMNLRLLFSKITS PKYFIAKISINGNGFYDFIFDMSGILEDAEIYFAIRADV
TTEYLLNFKIQSKIHTQSKIKNIVATQLEGLNVDQVPNPSSIPYLVNGYVYKIDKR
DQLFKDFKNESIISMYLTNNIKNPDIIMWAVFQ"
    gene              2622..4835
                     /locus_tag="CIKGKLE_00004"
    CDS                2622..4835
                     /locus_tag="CIKGKLE_00004"
                     /inference="ab initio prediction:Prodigal:002006"
                     /inference="similar to AA sequence:RefSeq:AVS37497.1"

```

```

/codon_start=1
/transl_table=11
/product="type VI secretion protein VgrG"
/protein_id="Prokka:CIKGLNE_00004"
/translation="MIKQTLGFYQDILHKEIDYSHIHFNYEEQELISQYNESDLEFIT
RLAHNNGIFFYEDENTIYFCDVYKVNKNEIEYNPNVNNILNQACISSIYKEQSLRTN
AFTHSSINANTPLNLLSLHSSKVPYEQELNNKAYYNEHFYESEYSFTRSIDLKTKPSL
KEKRALILNESLLAKSNIYHLSLGDFFITLNYKEFNLSGLSDDEDTKSQDEEKQDKASL
LKDFIIIANTQILIDDALLANSINTNDHLNLKDLNLSKSYSNTLTLKKNIIFTSPFK
AKPKAPHNTQGIVIGESKDIESERNIYTDYGRVKVRINLYANQEELDNNLLSANIK
TNTHENTNNTDSKDNTNFTSSNHLSSNAYKSYHHTPFLRVATSIANSHSGFFHTPRV
GDEVIVSFLDDDIDKPYVSSSLYNGATTMPQYNYPRYKREIATNALSYSVAPAMIDK
GLDTLKLQENTDYELSSINNHYLTLANSTIGVDNADARARNEITLKNDKDKEEYILA
QKDYKEEIGNNYEQTIKNNKTSEVGALYTEFITLGHMQNIIGFKNVNVGAEYLENTLL
SKDTNVGLNNTLVNGISNEVNIGQNHEEKIGNDKRVIINNNLEQDIKNDFIQRIGHNK
NETIKGSYVLQTNQSIKFSYKQDLSIETNDCFKAEADTFVSVFKAKKNCSFTADEVYTM
ANKESFLTAQKQIVSRVGNNTITQTKDKIILQVGTQVIIDSKGLRVQGGDLRAD"

```

ORIGIN

```

1  aaatataaaa  taatagaaaa  tataaaaaaca  aaaaagaaaa  atataagaat  aaatattaaa
61  agattaacaa  agaattctag  catttattaa  ctcctcttaa  ttttctctgt  cttttcataa
121  gacaaagcag  tgctaaaacc  acttgtagtg  ttggactgat  gaaatttaat  ctcatatctt
181  tgagaaaaat  ttctagcttg  taattctcta  aaatctccat  ttagtttcgc  ataaaaaaat
241  aaagaatcat  ctataaccaa  atatccatta  tattcatcat  gtaatgcttt  aaaatagtc
301  aatTTTTtcta  attcactctt  atctttaaaa  aatctagttt  tagatatttt  aaatcctaaa
361  gctTTTTgtc  cttcagtata  aacaaaatta  aaataactag  cttacacaaa  ttctgtataa
421  tctTTTaaat  tgttgatttg  ttctttattg  gtcattattt  attccttata  ttattattga
481  taaagattgc  cacaagcgag  ctcacacctc  ataaactcaa  aattcatatt  accctcattg
541  ccttctaaca  cataccttct  agtattccaa  tatggactta  tatgcatatc  aacaatcttg
601  tgtaaagaca  tttgcatatt  ttttgTTTT  agtgcaatat  tatccatctc  tatcttttct
661  tgaaaatttg  aaggagtttt  gtaagtatca  tcgtaatata  tataaagcca  catttctata
721  ctaccatatt  tttttacatg  tcgaaaatca  tctatgtcac  ctaacttttt  atcaaaaatac
781  cctagaatct  tattatattt  ctcttcgTTA  ttaggaagtt  catttaactt  acacatattc
841  ctaaattgcc  aataacttgg  ctctaaataa  taagaatatg  gagtataata  aaagataatt
901  aaacctatac  ttccaagaaa  gactaaaaac  tttgaaacgc  tttttgtaga  tttaaagatg
961  attttataaa  taaattttta  tataagataa  gaaagaatag  tagaaattat  aataagaagt
1021  aatatgtatg  tcattataag  ttatttcctt  tagattatct  attttattaa  aattaagatg
1081  taattttgtg  gtttagtggt  agcagtataa  ctttttcttt  atcattaaaa  taatagagct
1141  tgtTTTTtca  tatattttta  tccttttagat  ttgtatttga  tttttattct  agctgtaaaa
1201  taatttttat  ttaattttac  tcataacaaa  taaattgata  tttaaaaaaa  tttaatatct
1261  ttattctata  tgtgttaaAT  tttttatcaa  tacagatata  ttgttatcca  ctttaagatt
1321  attggtttct  aaattaaaaa  ttgcaaagct  taatactcct  aatacaatca  atactggcac
1381  aatgataata  agttttttta  aatacaatct  tataaatttt  tgccaaatat  tttcttctaa
1441  accaattttg  tatgctttat  taaaagctaa  ctcttcttct  gtcttataaa  ctggtcttaa
1501  agatgtggca  atattattgc  aaaaatggat  tattttttca  tctctatcct  tagcctcatt
1561  atattttcct  ttataaccaa  gaatcaaaca  agcataaata  aattccaaaa  aatctttaaa
1621  cttaaaagga  ttattaatcc  aagatgatgc  aatatcataa  aaattatttc  cacctaaggt
1681  ttcatcaaat  aatcttacag  ttagagtatt  gtgagcccaa  aaattgataa  aaagttcatt
1741  tttcatcaag  ctttcatcta  taaagacaca  aagacaatat  ttgaatttaa  taatttcttt
1801  ttcatcatat  tctttacaca  tgcttagttt  agcggttata  tctaaaattt  tattaatcaa
1861  tgtttctcta  agttgattaa  tattacttgt  atccatagag  cttatttttg  aaagtctgta
1921  agaaagcaaa  agtaactcca  aagaataatc  aataatttta  ttgtttttta  aaccatcaaa
1981  atttgaatca  agaagtaagc  ttaatgcctt  tttttcttcg  tttatttctt  tcattgaaat
2041  accgcccaca  ttataaatatc  aggatttttt  atattgttgg  tcaagtacat  actaatgata
2101  ctttcatttt  taaaatcttt  aaacagctga  tctcttttat  ctattttata  ataaacgtaa

```

2161 ccatttaa at aaggaatact agatggaaca ttaggtactt gatctacatt taagccttca  
2221 agctgtgttg ctactatatt ttttaatttta ctttgcgtat gtatcttgct ttgaatttta  
2281 aaattattaa gtagatattc tgtagtaaca tctgcacgaa ttgcaaaata aatttcagca  
2341 tcctctaaaa ttcccagatt atcaaaaata aaatcataaa aaccattgcc attaatactg  
2401 atcttagcta taaaatattt aggacttgtg attttggaaa ataacaatct taaattattc  
2461 atcatattta aaaaagtatt ataaagatta tcatgtttat aaggaataaa atctaaaaaa  
2521 gattcttcat tactaaaagc tgcaagctct ctttgaaatt ctaaaaattt ttcgtataaa  
2581 aattcaggat gtatTTTTat actcatactc atatcataga agtgattaaa caaaccttg  
2641 gTTTTatca agatatctta cataaagaaa ttgattattc tcatatacat tTTaattatg  
2701 aagaacaaga acttatctct caatacaatg aaagcgattt agaatttatc acaagattag  
2761 ctacaataa tggaatcttt ttttatgaag atgaaaacac tatttatttt tgtgatgtgt  
2821 ataaaaatgt aaaaaataaa gaaattgagt acaatcctaa tgtgaataat attttaaatc  
2881 aagcttgtat ttcttctatc tataaagagc aaagtttaag aactaatgct tttacacatt  
2941 ctagtatcaa tgctaatact cttttaaadc ttttatcttt acactctagt aaagttcctt  
3001 atgagcaaga acttaacaat aaagcttatt ataatgaaca tttttatgag agtgaatatt  
3061 cttttacaag aagtattgat ttaaagacta agccttctct taaagaaaaa agagccttga  
3121 tcttaaataa aagcttacta gcaaaaagta atatttatca tcttagcttg ggagatttta  
3181 tcactttaaa ttataaggaa ttttaatttga gtggattgag tgatgatgaa gatactaaaa  
3241 gtcaagatga agaaaaacaa gataaagctt ctttgcttaa agactttatt attattgcca  
3301 atactcaaat cttaatagat gatgctttac tagctaattc tatcaatact aatgatcatt  
3361 taaattttaaa agattttaat ttaagtaagt cttattctaa tacttttaact ttattaaaaa  
3421 agaataattat ctttactcca agttttaaag ctaagcctaa agcccccat aatactcaag  
3481 gtattgttat aggagagagt aaggatatag aaagtgagag aaatactatt tatactgatg  
3541 agtatggaag ggtaaaggta aggattaatc tttatgctaa tcaagaggaa ttagataata  
3601 atcttttaag tgcaaacata aaaaccaata ctcatgaaaa tacaacaat actgattcta  
3661 aagataatac aaacttcaca aactcttcta atcatttatc aagcaatgct tataaatctt  
3721 atcatcatal tcctttttta agagtagcaa caagtatagc aagcaatcat tcaggctttt  
3781 ttcatactcc aagagtggga gatgaagtga ttgtttcttt tttagatgat gatatagata  
3841 aaccctatgt gagctctagt ttgtataatg gggctacaac catgccccaa tataattatc  
3901 caagatacaa aagagaaatc gctacaaatg cattgagcta ttttaagcgtg gctcctgcta  
3961 tgattgataa aggttttagat acattaaaac ttcaagaaaa tactgattat gaattaagct  
4021 ctataaacia tcattatctt acttttagcaa attctacaat aggagtagat aatgccgatg  
4081 caagagcaag gaatgaaatt accctaaaaa acgacaaaaga caaagaagaa atttatatcc  
4141 tagcacaana agattataaa gaagaaatag gtaataatta cgagcaaac ataaaaaata  
4201 ataaaacttc agaagtggga gccttatata ccgaatttat cacttttagga catatgcaaa  
4261 atattatagg ttttaaaaat gtcaatgtag gagctgaata tctagaaaat accttgcttt  
4321 ctaaagatac taatgtgggt ttaaataata ctttgaatgt gggaatcagc aatgaagtca  
4381 atatcgaca aaaccacgaa gaaaagatag gaaacgataa aagagtaata atcaataaca  
4441 atctagaaca agatatcaaa aatgatttta tccaaagaat aggacataat aaaaatgaaa  
4501 ccataaaagg ttcttatgtg cttcaaacca atcaaagtat aaaattttat tccaaacaag  
4561 atctaagcat agaacaac gattgcttta aagctgaagc tgatactttt gttagtttca  
4621 aagccaagaa gaattgctct tttacagccg atgaagtgt tactatggca aataaagaaa  
4681 gttttttaac agcacaanaa caaattgttt ctagggtagg aaatacaact atcacacaaa  
4741 caaaagataa gattatactc caagtaggaa caacacaagt gattatagat agtaaagggt  
4801 taagagtgca aggaggtgat ttaagagcag attaaaagca attttcttaa aattaaaacc  
4861 aaaatcataa ataaacctaa tttacaataa aaggaaaaac aatgaaaaca ttagaagaat  
4921 taatagcttt agaagaaaaa tatctaaaag aattatgttt agaattttat gatctttag  
4981 aggctaacia acttgaagaa gttaaagaat tt

//

LOCUS CIKGLNE\_2 3592 bp DNA linear 12-APR-2021  
DEFINITION Campylobacter species strain strain.  
ACCESSION  
VERSION  
KEYWORDS .

SOURCE Campylobacter species  
 ORGANISM Campylobacter species  
 Unclassified.

COMMENT Annotated using prokka 1.14.6 from  
<https://github.com/tseemann/prokka>.

FEATURES Location/Qualifiers

source 1..3592  
 /organism="Campylobacter species"  
 /mol\_type="genomic DNA"  
 /strain="strain"

gene 480..761  
 /locus\_tag="CIKGKLE\_00005"

CDS 480..761  
 /locus\_tag="CIKGKLE\_00005"  
 /inference="ab initio prediction:Prodigal:002006"  
 /codon\_start=1  
 /transl\_table=11  
 /product="hypothetical protein"  
 /protein\_id="Prokka:CIKGKLE\_00005"  
 /translation="MLLWFGYFFIPLWQSSFKFESLCENLKNREVIYNQEIYDRVK  
 GKNNAIRVKFVENNIGLRIQKVEYQYYKIVTNILYKNYYTYGWLYMYVC"

gene 733..831  
 /locus\_tag="CIKGKLE\_00006"

CDS 733..831  
 /locus\_tag="CIKGKLE\_00006"  
 /inference="ab initio prediction:Prodigal:002006"  
 /codon\_start=1  
 /transl\_table=11  
 /product="hypothetical protein"  
 /protein\_id="Prokka:CIKGKLE\_00006"  
 /translation="MVGYICMFAKNGRILGCDGIDEYKKKIKERDY"

gene 963..2465  
 /locus\_tag="CIKGKLE\_00007"

CDS 963..2465  
 /locus\_tag="CIKGKLE\_00007"  
 /inference="ab initio prediction:Prodigal:002006"  
 /inference="similar to AA sequence:RefSeq:CKG86849.1"  
 /codon\_start=1  
 /transl\_table=11  
 /product="hypothetical protein"  
 /protein\_id="Prokka:CIKGKLE\_00007"  
 /translation="MDEGLFWENLVSTEYIGAMQEKISNESFSNNISFRSLEYDATVL  
 PAELECCYNEFKYHQKSNNEIATLGWAVSYQLQALWQNSPKIDTIQNYHLPIKQNKPN  
 NPQAEQRLKEIQNFLQSKGIEPLILHYTPYPKNTQTQEMKRLRQNSERFSRHVDNKTN  
 EVREEKRSIKFYTTLDWDFYSHFPIIKRLSKKFHTKEDIYTQNFQKQIEIILQKTHN  
 ILILKNLPQGEYKFDFAIDIKENRSDKNEESYIIKENDEISKDYKRILDCKPYELDT  
 LNCQYIGAGDDEFLLQALQIIDINIKQQFDLDFATKTLIKNSTIPNKIYFTYKDYHYA  
 MQDLSLYACSGKFSFNVPKLSIKKEIQGDREKVLRYVDEMLVYVYDSFDFLDQGHE  
 FDDEGNFIKLGQPVGAWDFNEKSFSIWGSTRQMETYKPKKEYLFFIPQITFADILQSPK  
 TKQYYLYNQDYQDYQKFTPYGLDFKLYSKDFITKLDKDKAYNVLYDTGV"

gene 2466..2969  
 /locus\_tag="CIKGKLE\_00008"

CDS 2466..2969  
 /locus\_tag="CIKGKLE\_00008"

```

/inference="ab initio prediction:Prodigal:002006"
/inference="similar to AA sequence:RefSeq:CKG86821.1"
/codon_start=1
/transl_table=11
/product="hypothetical protein"
/protein_id="Prokka:CIKGLNE_00008"
/translation="MGDSIMLSTSLGLVGFIFAFTNIKFYLTTLVSVLIVFSILNYWIK
INIKEFVKSYFSIYFIIFFTAIVIIFYLTYGIKTSKDLALLSSLEAKELSPQEYKARN
YFGFLTCMTMFFLVITFIILPCLLQAYLFKCYSTGEKRKLSWFIGFVCNAPILIASV
YVYENL"
gene      2947..3087
          /locus_tag="CIKGLNE_00009"
CDS      2947..3087
          /locus_tag="CIKGLNE_00009"
          /inference="ab initio prediction:Prodigal:002006"
          /inference="similar to AA sequence:RefSeq:CKG86746.1"
          /codon_start=1
          /transl_table=11
          /product="hypothetical protein"
          /protein_id="Prokka:CIKGLNE_00009"
          /translation="MWYMKIFKDYQKFTPYGLDFRLYSKDFITKLDKDKAYNVLYNI
GV"
gene      3088..3588
          /locus_tag="CIKGLNE_00010"
CDS      3088..3588
          /locus_tag="CIKGLNE_00010"
          /inference="ab initio prediction:Prodigal:002006"
          /inference="similar to AA sequence:RefSeq:CKG86719.1"
          /codon_start=1
          /transl_table=11
          /product="hypothetical protein"
          /protein_id="Prokka:CIKGLNE_00010"
          /translation="MGDSIALSIFWGLIGFILTCSVIEFYLIASVLIIVFSILNYWIK
INIKEFVKSYFLISFIIFFMAIVIVFYLTYDLETSRGLVLLGPPEIEKLSPOEYKARN
YFDLGGITFIFLVITFFILPCLLQAYLFKCYSTGEKRKLSWFIGFVCNPILITSMY
VIYENL"

```

ORIGIN

```

1  aat t t t a t t t   a t a t a a g g t a   t t t g a a a t a a   t a c a a t t t a a   a a a g g a g t a t   t a a a t g a a a a
61 t c a c a a t g a t   a a t t c t a a g c   t t a t t t t c t t   t a g t a t t t t t   a a g t g c a t g t   g c t t t t a a a g
121 a a a a a a a g c a   a g t g a a a t a g   a a a c t c t t g c   a a g t a a t t a t   g g t g g a a t t t   a t a t c t t t g a
181 t a a a a a a a t a   a g a g a a g a g a   t a t t g g a a t t   a g a g a a a a a a   g a g a a g a a t t   t c g t a g t a a g
241 t a t t t g g g t a   g t g a a a t t a a   a g t a g g a a a t   g a a a c t c a t t   t t g t g a a t t t   t t c t t a t t t g
301 a a g a a a a a a t   t c c c c c a a g t   c c t t t c t a a t   g g t t g t a a a t   a t t a t c g t a a   t g a t t a t a a t
361 t a t g a t g t a a   a a g a c c c a g a   t t a t g a t t t t   a a t t t c g a c g   a t a a a c c c g a   a t t t g c a t a c
421 t a t g a a g a t c   a a t t t a a a g c   a t a t a t g g g t   g a a g a a a a c t   a t a a a a a a t t   a a g a c c t t t a
481 t g c t t c t t t g   g t t c g g a t a c   t t t t t t a t a c   c t c t t g a a t g   g c a a a g t a g t   t t t a a a g a a t
541 t t g a g a g t t t   g t g t g a g a a t   t t a a a a a a t a   g a g a a g t g a t   t t a t a a t c a a   g a g a t t t a t g
601 a t a g a g t t a a   a g g c a a a a a t   a a t g c t a t a a   g a g t a a a a t t   t g t t g a g a a c   a a t a t a g g a t
661 t a a g g a t a c a   a a a a g t a g a a   t a t c a a t a t t   a t a a a a t t g t   a a c a a a t a t t   t t a t a t a a a a
721 a t t a c t a t a c   a t a t g g t t g g   c t a t a t a t g t   a t g t t t g c t a   a a a a t g g a a g   a a t a t t a g g t
781 t g t g a t g g c a   t t g a t g a a t a   t a a g a a a a a a   a t a a a a g a a a   g a g a c t a c t a   a t g c a t a a a a
841 a a c a a g c c a a   a t a t a t g a a a   c t t t a t a a a t   a t g t t a g a a t   a t g c t g g a t t   a g t t a t t t g t
901 a a a t t t a a a t   g a a a a c a t a c   t t g a a a a a t t   t c t a a a a a a t   a t a a a a a c a a   t a g g a t a a a a
961 t g a t g g a t g a   a g g a c t t t t t   t g g g a a a a t c   t t g t t t c a a c   a g a a t a t a t a   g g a g c a a t g c

```

```

1021 aagagaaaat atcaaatgaa tcattttcaa ataataaag ttttagatct ctagaatatg
1081 atgcaacagt tttgcctgcg gaattagagt gttgctacaa tgaatttaag taccatcaaa
1141 aaagcaataa tgaaatagca aacttagggt gggctgtag ttatcaactt caagcattgt
1201 ggcaaaatag ccctaagata gatacaatac aaaattatca tctccctata aaacaaaata
1261 agcctaataa tccccagca gaacaaagac taaaagaaat acaaaatffc ttacaaagta
1321 aaggataga accccttatt ttgcactata ccccttatcc aaaaaacaca caaacacaag
1381 agatgaaaag actaaggcaa aattcagagc gtttttctcg ccatgtagat aataaaacaa
1441 atgaagtaag agaagaaaag cgttctatta aattttacac tacgctagat tgggataagt
1501 tttattctca ttttcctata atcaaaagac taagtaaaaa atttcataca aaagaagaca
1561 tatacactca aaattttaca aagcaaatag aaataatctt acaaaaaact cataatattt
1621 tgatattaaa aaatttgcct caaggagaat ataaatttga ttttgctatc gatataaaag
1681 aaaatcgaag cgataaaaat gaagaatctt atatcatcat taaagaaaat gatgaaatft
1741 caaaagatta taaacgcatt ttagactgta agccctatga gcttgatact ttaaattgtc
1801 aatatatagg tgcgggtgat gatgagtttt tacagcaagc tttacaaatt atagatatta
1861 atattaaaca acaatttgat ttagattttg caacaaaaac ttttaattaaa aattcaacaa
1921 ttccaaataa aatftatftt acatataaag attattatca tgcaatgcaa gatctatctc
1981 tttatgcttg tagtggtaaa ttttctftta atfttgftc tftcaaaatta agcattaaaa
2041 aagaaattca aggagatagg gaaaaggfat tataccgctg tgatgaaatg cftgfttatg
2101 tttatgatag cfttgatftt ttagatcaag gacatgaatt tgatgatgag ggaatftfta
2161 tcaaattagg acaacctgtt ggggcttggg atfttaatga aaagagftft agcatttggg
2221 gttctacaag acagatggaa acttataaac caaaggaata tftatftftt ataccacaaa
2281 taactfttgc tgatattcta caatcccaa aaaccaacaa atactatctt tacaatcaag
2341 attaccaaga ctaccaaaaa tftactcctt atggfttggg tfttaactft tatagtaaag
2401 atfttatcac taaacttgat tftaaagata aagcttataa tgtgctftat gatacaggag
2461 tftaaatggg agatagtatt atgctfttcta cftcfttagg tftggttaga tftatftftg
2521 cftftactaa tataaaatft tatcttacca cfttaagtgt cfttattgtc tfttctatft
2581 taaattattg gatcaagatt aatataaaaag aatftgtaa atcttattft tcaatatatt
2641 ttattatctt tfttacagct attgftatca tftfttatct tacctatggt atftaaactt
2701 ctaaggatct tgcattgctt agctctctag aagctaaaga attatcacca caagaatata
2761 aagcacgtaa tftatfttggg tftftgactt gtatgactat gftftftfta gtaatcacat
2821 ttatcact tcttfttfta tftgcaagctt atftatftaa atgttatagc acaggagaaa
2881 aacgcaaaaa atftaagfttg tftatagggt tftgtgtgtaa tgctcctata tftaattgcga
2941 gtgtgtatgt ggtatatgaa aatcftftaa gactatcaaa aatftactc tftatgfttg
3001 gatfttagac tftatagtaa agatfttatc actaagcttg atfttaaga taaagcttat
3061 aatgtgctft ataatatagg agfttaaatg ggagatagta tftcactftc tftftfttgg
3121 ggfttgatag gatftattct tacttftagt gftatagaat tftatctftat agctctaagc
3181 gftcttattg tctfttctat tftaaattat tggatcaaga tftaatataaa agaatttgta
3241 aaactftatt tfttaatct tfttattatc tftfttatgg ctattgttat cgtatfttat
3301 cftacttatg atcttgaac tfttagggga cftgtattac tftgctctc agaaattgaa
3361 aaattatcac cacaagaata taaagcacgt aatftatftg atftfttagg cggataact
3421 tftatftftt tagtaatcac atftftftata ctcccttgtt tattgcaagc tftatftatft
3481 aaatgttata gcacaggaga aaaacgcaa aaatftaagft ggtfttagg gfttftgtgt
3541 aatcctatat taattacaag tatgtatgtg atatatgaaa atctftaaag ac

```

//

```

LOCUS      CIKGLNE_3          3244 bp   DNA       linear      12-APR-2021
DEFINITION Campylobacter species strain strain.
ACCESSION
VERSION
KEYWORDS   .
SOURCE     Campylobacter species
ORGANISM   Campylobacter species
            Unclassified.
COMMENT    Annotated using prokka 1.14.6 from
            https://github.com/tseemann/prokka.

```

```

FEATURES             Location/Qualifiers
    source            1..3244
                     /organism="Campylobacter species"
                     /mol_type="genomic DNA"
                     /strain="strain"
    gene              110..445
                     /locus_tag="CIKGKLE_00011"
    CDS               110..445
                     /locus_tag="CIKGKLE_00011"
                     /inference="ab initio prediction:Prodigal:002006"
                     /codon_start=1
                     /transl_table=11
                     /product="hypothetical protein"
                     /protein_id="Prokka:CIKGKLE_00011"
                     /translation="MDPQYYEFKSLCYFNLGKVLIEDESIGNKNTNIIIVTPKSKQIKDR
IVETRFERKNENQVVYRINTYFYDNYGIFLKGDEGAGLYFRYMEVLSCKNIDKKFKK
DDWQVETLE"
    gene              449..589
                     /locus_tag="CIKGKLE_00012"
    CDS               449..589
                     /locus_tag="CIKGKLE_00012"
                     /inference="ab initio prediction:Prodigal:002006"
                     /codon_start=1
                     /transl_table=11
                     /product="hypothetical protein"
                     /protein_id="Prokka:CIKGKLE_00012"
                     /translation="MSKNIKTQEAKLDLITKFLDYANCADASYAMLHLIDENDEKGF L
KG"
    gene              592..1230
                     /locus_tag="CIKGKLE_00013"
    CDS               592..1230
                     /locus_tag="CIKGKLE_00013"
                     /inference="ab initio prediction:Prodigal:002006"
                     /codon_start=1
                     /transl_table=11
                     /product="hypothetical protein"
                     /protein_id="Prokka:CIKGKLE_00013"
                     /translation="MLEFFVNLLIFILIFFFVFIFSIILYFIFKVFFKIKNKTKTIN
FKTMFKKLALFLLPVYLLLFLAGGCSYKYMDPQYYEFKCLKDNSNKMIVFNKDYLDL
KKQFVQAMTNNIRIKNNGIKYFYNEKLNLEIQPSNWKIEIETKSREIKLGIGKVKEK
EIEAWYIDDKNNIKYQEFKRYLYNYSIFLGGDEGAGFHFYEEIILDCGDVR"
    gene              1362..1466
                     /locus_tag="CIKGKLE_00014"
    CDS               1362..1466
                     /locus_tag="CIKGKLE_00014"
                     /inference="ab initio prediction:Prodigal:002006"
                     /codon_start=1
                     /transl_table=11
                     /product="hypothetical protein"
                     /protein_id="Prokka:CIKGKLE_00014"
                     /translation="MLDLIDENDENSTLAPLWLYADGVTNLKNHSCRQ"
    gene              1470..2036
                     /locus_tag="CIKGKLE_00015"
    CDS               1470..2036

```

```

/locus_tag="CIKGLNE_00015"
/inference="ab initio prediction:Prodigal:002006"
/codon_start=1
/transl_table=11
/product="hypothetical protein"
/protein_id="Prokka:CIKGLNE_00015"
/translation="MKYIILTFILGLIVFVSVKGCIFYPTSYRAFIPKSLDSEYKEFER
LCKEEVGKVYARPIKHGIKLEDLFNLPSTSARRVALSRHMYMLIENVTTREDEIFYL
HIAGFEYYIGWTRKSFMSHDDSKKYIRCEPLLYGKTWKENAKIMEQKAFDNKEYIGTE
EYLQYSPYHYEYNTLYRQIVNFKQKKN"
gene 2036..2188
CDS  /locus_tag="CIKGLNE_00016"
2036..2188
/locus_tag="CIKGLNE_00016"
/inference="ab initio prediction:Prodigal:002006"
/codon_start=1
/transl_table=11
/product="hypothetical protein"
/protein_id="Prokka:CIKGLNE_00016"
/translation="MIYNYKYSLGIYVNDWGFMMGSEGNPHVFLGLKREQVHCGDMQI
KNTIYK"
gene 2241..2777
CDS  /locus_tag="CIKGLNE_00017"
2241..2777
/locus_tag="CIKGLNE_00017"
/inference="ab initio prediction:Prodigal:002006"
/inference="similar to AA sequence:RefSeq:CKG86719.1"
/codon_start=1
/transl_table=11
/product="hypothetical protein"
/protein_id="Prokka:CIKGLNE_00017"
/translation="MGDSITLSIFVGLLLSIAIITKFYLIALSVLIVFSILNYWIKIN
IKEFVKSYFLISFIIFFTAIVIVFYLTLDLETSRGLVLLGPPEVEKLSPQEYKAHNYF
KFLTFTTMFFLAITFFILPCLLQAYLFKCYSTGEKRKLSWFIGFACNIFLLIVSFYK
LYENLQRLSKIHSLWFGF"
gene 2725..2856
CDS  /locus_tag="CIKGLNE_00018"
2725..2856
/locus_tag="CIKGLNE_00018"
/inference="ab initio prediction:Prodigal:002006"
/inference="similar to AA sequence:RefSeq:CKG86746.1"
/codon_start=1
/transl_table=11
/product="hypothetical protein"
/protein_id="Prokka:CIKGLNE_00018"
/translation="MKIFKDYQKFTPYGLDFKLYSKDFITKLDKFKAYNVLYDTGV"

```

ORIGIN

```

1 aaataaaaca aaaactataa atttttaaac aatattttaa aaatttactt tgtttctttt
61 acctgtatat cttttattat tcttagtagg aggatgttct tataaatata tggatccgca
121 gtattatgag ttttaagagct tgtgttattt taatttgga aaagtgttga ttgaggatga
181 atctataaag aataaaacga atataatagt gacacctaaa agtaagcaaa taaaagatag
241 gatagtggaa actagatttg aaagaaaaaa tgaaaaccaa gtagtgtatt atcgtattaa
301 tacatatttt tatgataatt atggtatatt cttgaaaggc gatgagggtg ctggattata
361 ttttagatat atggaagtat taagttgtaa gaatattgac aaaaaattta agaaagatga

```



421 ctggcaagtt gaaactttgg aataacaaat gagcaaaaac attaaaacac aagaagctaa  
 481 attagactta atcactaaat ttttagacta tgctaattgt gcagatgcta gttatgcat  
 541 gttgcattta atcgatgaga atgatgaaaa aggtttttta aaaggataat aatgctagaa  
 601 ttctttgtta atcttttaat atttattctt atatttttct tttttgtttt tatattttct  
 661 attattttat attttatctt taaagtcttt tttaaaataa aaaataaaaac aaaaactata  
 721 aattttaaaa caatgtttaa aaaacttgct ttatttcttt tacctgtata tcttttatta  
 781 ttcttagcag gaggatgttc ttataaatat atggatccgc aatattatga atttaagaag  
 841 ttgtgtaaag ataatagtaa taaaatgata gtgtttaata aagattattt ggatttaaaa  
 901 aaacaatttg ttcaagctat gacgaataat tctaataata gaattaaaaa taatggtata  
 961 aatatTTTTT ataatgaaaa attgaatttg gaaattcaac cttcaaattg gaaagaaata  
 1021 gaaactaaat cacgcgaaat taaacttgga ataggaaaag taaaagaaaa agaaatagaa  
 1081 gcttgggata ttgatgataa aaataacatt aagtatcaag aatTTTaaacg atatTTTgtat  
 1141 tataattata gtatatTTTT aggaggcgat gagggcgctg ggTTTcattt tgaatatgag  
 1201 gaaatattag attgtggaga tgTTtagataa aaaattTaaa agcataatga gctTaaagata  
 1261 ggaatataaa atgagcaaaa acattTaaaac acaagaagct aaattagact taatcactaa  
 1321 atTTTTTTga ctatgcta atagcagatg ctagTTatgc aatgctTgat tTaatcgatg  
 1381 agaatgatga gaattcaacc cttgcacctt tatggctTTa tgcagatggg gTaaactaatc  
 1441 taaaaaatca tagTaaaagg caataaagta tGaaatataT tatattgact tttattctag  
 1501 gTTTgattgt atTTgtttca gTaaaaggTT gTTTTtatcc tacaagttat cgtgctTTta  
 1561 taccaaaaag cttagattcc gagtataaag agTTTgaaag attatgTaaa gaggaagtag  
 1621 gaaaggtagt atatgcaaga cctataaaaac atggTataaa gTTggaagat ttgtTTaact  
 1681 tgccttctac gagtgcTagg cgtgtTgctt taagcagaca tatgtatagT ttgatagaaa  
 1741 atgtTacaac aagagaagac gaaatTTTTT actTacaat agctggTTTT gaatattata  
 1801 taggctggac aagaaaaagt ttttctatgc atgatgattc taaaaaatat ataagatgtg  
 1861 agcctttgct ttatggTaaa actTgGaaag aaaatgctaa gataatggaa caaaaggcat  
 1921 ttgataataa agaatatata ggcaagaag aatattTaca atattcacct tatcattag  
 1981 agtataatac actttatcgc caaatagTta atTTcaaca aaagaaagag aattaatgat  
 2041 atataattac aaatactctc ttggaatcta tgTTaatgat tggggctTTa tgatgggcag  
 2101 tgagggaaac cctcatgtgt tcttaggact aaaaagagag caagtgcatt gtggcgatat  
 2161 gcaaataaaa aacacaatat ataaataaac ttgattTTag agataaagct tataatgtgc  
 2221 tttataatac aggagTTTaa atgggagata gtattacgct ttctatTTTT gtaggTTTat  
 2281 tgctatccat tgctattatc acaaaatTTT atcttatagc tttatctgtg cttattgtct  
 2341 tttctatTTT aaattattgg atTaaagatta atataaaaaga atTTgTaaaa tcttattTTT  
 2401 taatatcttt tattatcttt tttacagcta ttgttatcgt atTTtatctt acttatgatc  
 2461 ttgaaacttc taggggactt gtattacttg gTcctccaga agTTgaaaaa ttatcaccac  
 2521 aagaatataa agcacataat tattTTaaat tTTTaaactt tacaactatg tTTTTTTgg  
 2581 caatcacttt ttttatactc ccttgTTTTat tacaagctta tttatTTTaa tgTTatagca  
 2641 caggagaaaa acgcaaaaaa tTaaagTTggt ttatagggtt tgcgtgTaat atctTTTTat  
 2701 taattgtgag tTTTtataag ttatatgaaa atctTcaaag actatcaaaa attcactcct  
 2761 tatggTTTgg atTTTaaact ttatagTaaa gatTTTatca cTaaagctTga tTTTaaagat  
 2821 aaagcttata atgtgctTTa tgatacagga gTTTaaatgg gagatagtat tacattgtca  
 2881 attattatgg gaatgttatt ttctattctt tattTTgTaa tTTTtataaa aaactatatt  
 2941 ataataagctt tgattgtcct tgtTgtcttt tctattataa attattggat taagattaac  
 3001 ataaaagaat ttgTaaaatc ttatTTTTTta atatctTTTta ttatctTTTt tacagctatt  
 3061 gttatcgtat tttatctTac ttatgatctt gaaactTcta gagggctTgt attactTggt  
 3121 cctccagaaa ttgaagaatt atcaccacaa gagtataaag tacatggTta tttcggattt  
 3181 ttatTTTTTta caagtattgg cTTTTgtaca atcacatttt ttatactTcc ttgtTTtatta  
 3241 caag

//

LOCUS CIKGLNE\_4 1602 bp DNA linear 12-APR-2021  
 DEFINITION Campylobacter species strain strain.  
 ACCESSION  
 VERSION  
 KEYWORDS .

SOURCE Campylobacter species  
 ORGANISM Campylobacter species  
 Unclassified.

COMMENT Annotated using prokka 1.14.6 from  
<https://github.com/tseemann/prokka>.

FEATURES Location/Qualifiers

source 1..1602  
 /organism="Campylobacter species"  
 /mol\_type="genomic DNA"  
 /strain="strain"

gene 218..316  
 /locus\_tag="CIKGKLE\_00019"

CDS 218..316  
 /locus\_tag="CIKGKLE\_00019"  
 /inference="ab initio prediction:Prodigal:002006"  
 /codon\_start=1  
 /transl\_table=11  
 /product="hypothetical protein"  
 /protein\_id="Prokka:CIKGKLE\_00019"  
 /translation="MSKNIKTQEAKLDLITKFLDYANCADASYAML"

gene 395..712  
 /locus\_tag="CIKGKLE\_00020"

CDS 395..712  
 /locus\_tag="CIKGKLE\_00020"  
 /inference="ab initio prediction:Prodigal:002006"  
 /codon\_start=1  
 /transl\_table=11  
 /product="hypothetical protein"  
 /protein\_id="Prokka:CIKGKLE\_00020"  
 /translation="MKNSKGEDIVKPKNTNTAYACAIQARFEQNKIVKIEPKYCISLI  
 NTCFDSKEITLDNDISRVGLNDALSKRTIDFVNRFKLLKHQPNTTNCMLKKQRKLRGV  
 NKC"

gene 706..1332  
 /locus\_tag="CIKGKLE\_00021"

CDS 706..1332  
 /locus\_tag="CIKGKLE\_00021"  
 /inference="ab initio prediction:Prodigal:002006"  
 /codon\_start=1  
 /transl\_table=11  
 /product="hypothetical protein"  
 /protein\_id="Prokka:CIKGKLE\_00021"  
 /translation="MLEFFINLLIFILIFFFVFIFSIILYFIFKIFYKLNKTKTIN  
 FKTIFFKFTLFLPVYLLFLVGGCSYKYMDPQYYKFKSLCKDIDSKVVIYDKAYWEL  
 YSDFTKKKPSIEKRVKDDGYEYFYEKLNETFAYYDIKDMIKSKKRNGNIITIVYDKK  
 YKKMPKPFATYIRYKYENDGVFLRGDEGSLYFRYEEVFTCSYFDNFK"

gene 1341..1496  
 /locus\_tag="CIKGKLE\_00022"

CDS 1341..1496  
 /locus\_tag="CIKGKLE\_00022"  
 /inference="ab initio prediction:Prodigal:002006"  
 /codon\_start=1  
 /transl\_table=11  
 /product="hypothetical protein"  
 /protein\_id="Prokka:CIKGKLE\_00022"

/translation="MSKNIKTQEAKLDLITKFLDYANIADASYAMLDLIDENDEKGF  
LWYIKYKN"

ORIGIN

```
1 aaaataaatt tactttaaca gaagttacat ttgaagatta ttatgatggt attcattatt
61 caacgcattt atcctatatt tatgataatt atggtatggt cttaaaaggt gatgagggtg
121 ctggattcta ttttagatat cataaaagac tgtatttgga agatgttaga taaaaaatta
181 gaaagataat ttgagattta gatttttgga ataacaaatg agcaaaaaca ttaaaacaca
241 agaagctaaa ttagacttaa tcactaaatt tttagactat gctaattgtg cagatgctag
301 ttatgcaatg ttgtaatatg tttgggaaaa tatagagcaa gatgaaaaga ataatattta
361 tacttttggg gataaattaa agcaagatat tgttatgaaa aatagtaaag gagaagatat
421 tgtaaaacct aaaaatacaa acacagctta tgcttgtgct atacaagctc gttttgaaca
481 aaataaaata gttaaaatag aacctaaata ttgtatttct cttataaata cttgttttga
541 tagtaaagaa ataacattgg ataatgatat tagtagggta ggattgaatg atgcactgag
601 taaaagaact attgattttg taaatagatt taaactttta aaacatcagc ccaacactac
661 aaattgtctt atgaaaaaac agagaaaatt aagaggagtt aataaatgct agaattcttt
721 attaactctt taatattttat tctttatatt ttcttttttg tttttatatt ttctattatt
781 ttatattttta tcttttaaat tttttataaa ttaaaaaata aaacaaaaac tataaatttt
841 aaaacaatat ttaaaaaatt tactttgttt cttttacctg tatatctttt attattctta
901 gtaggaggat gttcttataa atatatggat ccgcagtatt ataagtttaa gagcttgtgt
961 aaagatatag atagtaaagt aatcattttat gataaagctt attgggaatt gtatagcgat
1021 tttacaaaaa aaaagccttc tatagaaaaa cgagttaagg atgatgggta tgaatatttt
1081 tattatgaaa aacttaatga aacatttgct tattatgata taaaagatat gatcaaatct
1141 aagaaacgaa atggtaatat tataaccata gtatatgata aaaaatataa aaaaatgccc
1201 aagccttttg ctacatatat aagatataaa tatgaaaatg atggtgtatt cttagagggt
1261 gatgagggct ctggattata ttttagatat gaagaagtat tcactttagt ctattttgat
1321 aattttaagt aaggatataa atgagcaaaa acattaaaac acaagaagct aaattagact
1381 taatcactaa attttttagac tatgctaata tagcagatgc tagttatgca atgcttgatt
1441 taatcgatga gaatgatgaa aaaggttttt tgtgggtatat taaatataaa aactaaatth
1501 tttttatata aggtatttga aataatacaa tttaaaaagg agtattaaat gaaaatcaca
1561 atgataattc taagcttatt ttcttttagta tttttaagtg ca
```

//

LOCUS CIKGKLINE\_5 1595 bp DNA linear 12-APR-2021

DEFINITION Campylobacter species strain strain.

ACCESSION

VERSION

KEYWORDS .

SOURCE Campylobacter species

ORGANISM Campylobacter species  
Unclassified.

COMMENT Annotated using prokka 1.14.6 from  
<https://github.com/tseemann/prokka>.

FEATURES

Location/Qualifiers

source

1..1595  
/organism="Campylobacter species"  
/mol\_type="genomic DNA"  
/strain="strain"

gene

242..778  
/locus\_tag="CIKGKLINE\_00023"

CDS

242..778  
/locus\_tag="CIKGKLINE\_00023"  
/inference="ab initio prediction:Prodigal:002006"  
/inference="similar to AA sequence:RefSeq:CKG86719.1"  
/codon\_start=1  
/transl\_table=11

```

/product="hypothetical protein"
/protein_id="Prokka:CIKGLNE_00023"
/translation="MGDSITLSIFVGSLLSIAVITKFYLIASVLIVFSILNYWIKIN
IKEFVKSYFLISFIIFFTAIVIVFYLTGYIETSRGLVLLGPPEVEKLSQPQEKAHNYF
KFLTFTTMFFLAITFFILPCLLQAYLFKCYSTGEKRKKSLSWFIGFACNIFLLIVSFYK
LYENLQRLSKIHSLWFGF"
gene      857..1360
          /locus_tag="CIKGLNE_00024"
CDS       857..1360
          /locus_tag="CIKGLNE_00024"
          /inference="ab initio prediction:Prodigal:002006"
          /inference="similar to AA sequence:RefSeq:CKG86821.1"
          /codon_start=1
          /transl_table=11
          /product="hypothetical protein"
          /protein_id="Prokka:CIKGLNE_00024"
          /translation="MGDGITLSTSLGLVGFIFAFTNIKFYLTTLVSVLIVFSILNYWIK
INIKEFVKSYFSIYFIIFFTAIVIIFYLTGYIETSRDLALLSSLEAKELSPQEKAYN
YFGFLTCMTMFFLVITFIILPCLLQAYLFKCYSTEKRKKSLSWFIGFLCNIIILIASV
YLMYIFI"

```

ORIGIN

```

1 caagcttatt tatttaaagt ttatagcaca ggagaaaaac gcaaaaaatt aagttggttt
61 atagggtttg tgtgtaatcc tatattaatt acaagtatgt atgtgatata tgaaaatcct
121 taaagactac caaaaattca ctccttatgg tttggatttt aaactttata gtaaagattt
181 tatcaccaag cttgatttta aagataaagc ttataatgtg ctttataata caggagttta
241 aatgggagat agtattacgc tttctatfff tgtaggttca ttgctatcca ttgctgttat
301 cacaaaattt tatcttatag ctttatctgt gcttattgtc ttttctatff taaattattg
361 gatcaagatt aatataaaag aatttgtaaa atcttatttt ttaatatcct ttattatcct
421 ttttacagct attgttatcg tattttatct tacctatggg attgaaactt ctaggggact
481 tgtattactt ggtcctccag aagttgaaaa attatcacca caagaatata aagcacataa
541 ttatttttaa tttttaacct ttacaactat gttttttttg gcaatcactt tttttatact
601 cccttgttta ttacaagctt atttatttaa atgttatagc acaggagaaa aacgcaaaaa
661 attaagttgg tttatagggt ttgcgtgtaa tatcttttta ttaattgtga gtttttataa
721 gttatatgaa aatcttcaaa gactatcaaa aattcactcc ttatggtttg gattttaaac
781 tttatagtaa agatfttttg ctaaacttga ttttaaatga aaagcttata atgtgcttta
841 taatacagga gtttaaatgg gagatgggat tacgctttct acttcttttag gtttggtagg
901 atttattfff gcttttacta atataaaatt ttatcttacc actttaagtg ttcttattgt
961 cttttctatt ttaaattatt ggatcaagat taatataaaa gaatttgtaa aatcttattt
1021 ttcaatatat tttattatct tttttacagc tattgttatc atattttatc ttacctatgg
1081 tattgaaact tctagggatc ttgcattgct tagctctcta gaagctaaag aattgtcacc
1141 acaagaatat aaagcgtata attatftttgg atftttgact tgtatgacta tgtftttttt
1201 agtaatcaca tttattatac tcccttgttt attgcaagct tatttattta aatgtttatag
1261 cacagaagaa aaacgcaaaa aattaagttg gtttataggg tttttatgca atattattat
1321 attaattgca agtgtgtatt tgatgtatat atttatttaa agactaccaa aaattcactc
1381 cttatggttt ggatttttaa ctttatagta aagattttat cactaagctt gattttaaag
1441 ataaagctta taatgtgctt tataatacag gagtttaaat gggagaagat attacatttt
1501 ctatfttttg gggtttattt ggatttattt ttgcttttac taatataaaa ttttatctta
1561 ccactttaag tgttcttatt gtcttttcta tttta

```

//

```

LOCUS      CIKGLNE_6              718 bp    DNA      linear      12-APR-2021
DEFINITION Campylobacter species strain strain.
ACCESSION
VERSION
KEYWORDS   .

```

SOURCE Campylobacter species  
 ORGANISM Campylobacter species  
 Unclassified.  
 COMMENT Annotated using prokka 1.14.6 from  
<https://github.com/tseemann/prokka>.  
 FEATURES Location/Qualifiers  
   source 1..718  
           /organism="Campylobacter species"  
           /mol\_type="genomic DNA"  
           /strain="strain"  
   gene 208..714  
           /locus\_tag="CIKGKLE\_00025"  
   CDS 208..714  
           /locus\_tag="CIKGKLE\_00025"  
           /inference="ab initio prediction:Prodigal:002006"  
           /inference="similar to AA sequence:RefSeq:CKG86719.1"  
           /codon\_start=1  
           /transl\_table=11  
           /product="hypothetical protein"  
           /protein\_id="Prokka:CIKGKLE\_00025"  
           /translation="MGEDITLSIFWGLVGFIFRLVTIDTILYITALSVLIVFSIINYW  
 IKINIKFVKSIFLVYFIIFFTAIIIIIFYLSYDLETSRGYVMLGPPEIEELSPQEYKV  
 HGYFGFLFFTSIGFCTITFFILPCLLQAYLFKCYSTGEKRKLSWFIGVFCNPILITS  
 MYVIYENL"

ORIGIN

```

1 aacgcaaaaa   attaagttgg   tttatagggt   ttttatgcaa   tattattata   ttaattgcaa
61 gtgcatat    gatgtatata   tttatntaaa   gactatcaaa   aattcactcc   ttatggtttg
121 gatttagac   tttatagtaa   agatnttatc   actaaacttg   atntntaaaga   taaagcttat
181 aatgtgcttt   atgatacagg   agntntaaatg   ggagaagata   ttacactttc   tattnttttg
241 ggtttgtag   gatttatntt   taggcttggt   actattgata   caatactntta   tattacagcc
301 ttaagcgctt   ttattgtctt   ttctattata   aattattgga   ttaaaattaa   tataaaagaa
361 tttgtaaagt   cttatntntt   agtatatntt   attatctntt   ttacagctat   tattatcata
421 tnttatctta   gctatgatct   tgaaacttct   agaggatatg   taatgctcgg   tcctccagaa
481 attgaagaat   tatcaccaca   agagtataaa   gtacatgggt   atttcggatt   tntatntntt
541 acaagtattg   gctnttgtac   aatcacatnt   tnttacttct   cttgntntatt   acaagcttat
601 ttatntaaat   gnttatgcac   aggagaaaaa   cgcaaaaaat   taagtntggt   tatagggntt
661 gtgtgtaatc   ctatattaat   tacaagtatg   tatgtgatat   atgaaaatct   ttaaagac

```

//

LOCUS CIKGKLE\_7 649 bp DNA linear 12-APR-2021  
 DEFINITION Campylobacter species strain strain.  
 ACCESSION  
 VERSION  
 KEYWORDS .  
 SOURCE Campylobacter species  
 ORGANISM Campylobacter species  
 Unclassified.  
 COMMENT Annotated using prokka 1.14.6 from  
<https://github.com/tseemann/prokka>.  
 FEATURES Location/Qualifiers  
   source 1..649  
           /organism="Campylobacter species"  
           /mol\_type="genomic DNA"  
           /strain="strain"  
   gene 253..384

```

CDS
    /locus_tag="CIKGLNE_00026"
    253..384
    /locus_tag="CIKGLNE_00026"
    /inference="ab initio prediction:Prodigal:002006"
    /inference="similar to AA sequence:RefSeq:CKG86746.1"
    /codon_start=1
    /transl_table=11
    /product="hypothetical protein"
    /protein_id="Prokka:CIKGLNE_00026"
    /translation="MKIFKDYQKFTPYGLDFKLYSKDFITKLDKDKAYNVLYNTGV"

```

ORIGIN

```

1 ctgcgaaatt cacttctctt tttttagagg ttaagcaatt accatctgaa gaatacctag
61 ttttagctg tcttgcatc ttatttatca taactatgga attttttata atcacattct
121 ttatacttcc ttgtttatta caagcttatt tttttaaatg ctatagcaca ggagaaaaaac
181 gcaaaaaaatt aagttggttt atagggtttg cgtgtaatat ctttttatta attgtgagtt
241 tttataagtt atatgaaaat ctttaaagac tatcaaaaat tcactcctta tggtttggat
301 tttaaacttt atagtaaaga ttttatcacc aagcttgatt ttaaagataa agcttataat
361 gtgctttata atacaggagt ttaaatggga gatagcatta cactttctat tttttggggt
421 ttgattttgt ttattgctag ttttactggt gcaagaattt atcttatagc tctaagcggt
481 cttattgtct tttctatfff aaattattgg atcaagatta atataaaaga atttgtaaaa
541 tcttattfff taatatcttt tattatcttt tttacagcta ttgttatcgt attttatctt
601 acttatgatc ttgaaacttc tagagggctt gtattacttg gtcctccag

```

//

LOCUS CIKGLNE\_8 598 bp DNA linear 12-APR-2021

DEFINITION Campylobacter species strain strain.

ACCESSION

VERSION

KEYWORDS .

SOURCE Campylobacter species

ORGANISM Campylobacter species

Unclassified.

COMMENT Annotated using prokka 1.14.6 from  
<https://github.com/tseemann/prokka>.

FEATURES Location/Qualifiers

source 1..598

/organism="Campylobacter species"

/mol\_type="genomic DNA"

/strain="strain"

gene complement(10..453)

/locus\_tag="CIKGLNE\_00027"

CDS complement(10..453)

/locus\_tag="CIKGLNE\_00027"

/inference="ab initio prediction:Prodigal:002006"

/codon\_start=1

/transl\_table=11

/product="hypothetical protein"

/protein\_id="Prokka:CIKGLNE\_00027"

/translation="MHEWILCGEEVKYLEEALKLGANPNMRRIKTENKFSFSGAGETL

LHRAARSKEKPIGACVEVLIKYGADVNAVNCGICDIEDGKIEYDPATPLDEANTYDI

NKNIKILKKAGAKTWEELVEEYNIDTSLEEPEQIKMYEERRKDKK"

ORIGIN

```

1 tttttccttt tttttttat cttttcttct ttcttcatac attttaattt gttctggttc
61 ttctaagctt gtatcgatat tgtattcttc aaccaattct tccaagtct tagctcctgc
121 tttttttaag atttttatat ttttatttat atcgtaagta ttagcttcat ccaatggagt

```

```

181 agcaggatca taatattcaa ttttcccatc ttcaatatca catataccac aattaactgc
241 atttaccatca gctccatatt tgattagcac ttccacgcaa gctcctatag gcttttcttt
301 acttcttgca gctctatgca aaagggtttc tcctgcacca ctaaagctaa atttattttc
361 tgttttaatt cttctcatat taggatttgc tcctaatttt aaagcttctt ctaaatactt
421 cacttcttcg ccacatagta tccattcatg caaaggagtg ctgccacttt tttcattata
481 agtttcaaat gtgcatcctt ttttaaaaaa atactctatt acttctttat tttttccatc
541 tctatcgata tatctactga gtgcattgta tccaaagtgt acttcatcag ctttaagt

```

//

>>BfR-CA-15866\_min\_cov\_30 putative plasmid location

```

LOCUS      HHHABCBJ_1                1844 bp    DNA        linear      12-APR-2021
DEFINITION Campylobacter species strain strain.
ACCESSION
VERSION
KEYWORDS   .
SOURCE     Campylobacter species
  ORGANISM Campylobacter species
            Unclassified.
COMMENT    Annotated using prokka 1.14.6 from
            https://github.com/tseemann/prokka.
FEATURES   Location/Qualifiers
  source   1..1844
            /organism="Campylobacter species"
            /mol_type="genomic DNA"
            /strain="strain"
  gene     1..468
            /gene="trxB_1"
            /locus_tag="HHHABCBJ_00001"
  CDS      1..468
            /gene="trxB_1"
            /locus_tag="HHHABCBJ_00001"
            /inference="ab initio prediction:Prodigal:002006"
            /inference="similar to AA sequence:RefSeq:CKG87041.1"
            /codon_start=1
            /transl_table=11
            /product="thioredoxin reductase"
            /protein_id="Prokka:HHHABCBJ_00001"
            /translation="MDWVIDLTEYEFADDADGKAIRSLDDDLVKGKLDPRDIDSTPE
SRREFNREMWAYRRGSVAFYNTDIPNDWTNQEAKLYIDSLILESKLAVLTPPQGYRNA
PYYWVPEHLEYVYKHKLDKLLDPRIPAIYRYNFPRELRAKILKFAEENGIKD"
  gene     550..1827
            /gene="trxB_2"
            /locus_tag="HHHABCBJ_00002"
  CDS      550..1827
            /gene="trxB_2"
            /locus_tag="HHHABCBJ_00002"
            /inference="ab initio prediction:Prodigal:002006"
            /inference="similar to AA sequence:RefSeq:CKG86610.1"
            /codon_start=1
            /transl_table=11
            /product="thioredoxin reductase"
            /protein_id="Prokka:HHHABCBJ_00002"
            /translation="MSDTYEIYTPHGSILDVNKKTNEIYFDQSSKPTGKYTKEYSKAL

```

FKAWEIMENSPYKDYEPRYLDPNFYTGQKSTLVEFKEWQSIYLDPIKGSIAPWTKAE  
KAYYKSLKTKRERYKYL VIRSGIRSTVIDIPYDAYANVDEKGNLINEDYKELYKEVEA  
NRGLAHLSDGYLFMGEWELAAGILGDIKGFIGALQLSMTGFKARTQAVNLLIQLGHE  
QGFKSLYDSYAYRGLTDGIHKNPLKAQMLKDFSKNPPYDEFGLPFLDELGMVDWVID  
LTEYEFADDADGKAIRSLDDDLKGLKLDPRIDSTPESRREFNREMWAYRRGSVAFY  
NTDIPNDWTNQEAKLYIDSLILESKLAVLTPPQGYPNAPYYWVPEHLEYVYKHKHLDK  
LLDPRIPAIYRYNFPRELRAKILKFAEENGIKD"

ORIGIN

1 gtggattggg tgattgattt aacagaatat gaatttgcag atgatgctga tggtaaagct  
61 attagatcct tagatgatga tgttttaaaa ggtaaattaa aagatccaag agatatagac  
121 tctactccag agagtagaag agagtttaat cgtgaaatgt gggcatatcg tagaggttct  
181 gttgcatttt acaatacggg tattccaat gattggacta atcaagaagc gaaactatat  
241 atagattctc ttattttaga atctaaacta gcagtcctaa ctcctccaca aggctatcct  
301 aatgcacctt attattgggt tccagaacat ttagaatatg tttacaaaaa acataagctt  
361 gataaactcc ttgatccaag aatccctgct atttatagat ataatttccc aagagaactt  
421 agagctaaga tactcaaatt tgctgaagaa aatggcatta aagattaaag taattgcata  
481 ggcagactag ccactactat cattatgaaa aatggtttgc atataggtta aataaagaaa  
541 ggataaaaga tgagtgatac ttatgagatt tatacaccac atggttccat attagatggt  
601 aataaaaaaa ctaatgaaat atattttgat caaagttcca aaccacaggg aaaatatacc  
661 aaagaatatt ccaaagccct cttcaaagct tgggaaatca tggaaaactc cccctacaaa  
721 gattatgaac caagatattt agatcctaac ttttatacag ggcaaaaatc cactctagta  
781 gaatttaaag aatggcaaag catatattta aaagatccta tcaaaggaag catagctcct  
841 tggactaaag cagaaaaagc ttattataaa tctttaaaaa ctaaaagaga aagatataaa  
901 tatctagtga ttagaagtgg tataagaagc actgttatag atatacccta tgatgcttat  
961 gctaatgtag atgaaaaagg aaatttaatc aatgaagatt ataaagaact ttacaaagaa  
1021 gtagaagcta atagaggctt agctcattta agtgatggat atttatttat ggggtgaatgg  
1081 gaattagcag cagggatact aggagatata aaaggattta taggagcctt acaactttct  
1141 atgacaggat ttaaagcaag aaccaagca gtaaattttt tactcataca actaggacat  
1201 gaacaagggt ttaaaagtct ttatgattct tatgcatata gaggtttaac agatggtata  
1261 cataaaaacc ctcttaaagc tcaaagtcta aaagactttt ctaaaaatcc tccttatgat  
1321 gaatttggaa tgctaccttt cttagatgag cttatggggg tggattgggt gattgattta  
1381 acagaatatg aatttgcaga tgatgctgat ggtaaagcta ttagatcttt agatgatgat  
1441 gttttaaaag gtaaattaaa agatccaaga gatatagact ctactccaga gagtagaaga  
1501 gagtttaatc gtgaaatgtg ggcatatcgt agaggttctg ttgcatttta caatacggat  
1561 attcccaatg attggactaa tcaagaagcg aaactatata tagattctct tattttagaa  
1621 tctaaactag cagtcttaac tcctccacaa ggctatccta atgcacctta ttattgggtt  
1681 ccagaacatt tagaatatgt ttacaaaaaa cataagcttg ataaactcct tgatccaaga  
1741 atccctgcta tttatagata taatttcca agagaactta gagctaagat actcaaattt  
1801 gctgaagaaa atggcattaa agattaaagt aattgcatag gcag

//

LOCUS HHHABCBJ\_2 1739 bp DNA linear 12-APR-2021

DEFINITION Campylobacter species strain strain.

ACCESSION

VERSION

KEYWORDS .

SOURCE Campylobacter species

ORGANISM Campylobacter species  
Unclassified.

COMMENT Annotated using prokka 1.14.6 from  
<https://github.com/tseemann/prokka>.

FEATURES Location/Qualifiers  
source 1..1739  
/organism="Campylobacter species"  
/mol\_type="genomic DNA"



```

gene      /strain="strain"
          complement(703..1482)
          /gene="trxB_3"
          /locus_tag="HHHABCBJ_00003"
CDS       complement(703..1482)
          /gene="trxB_3"
          /locus_tag="HHHABCBJ_00003"
          /inference="ab initio prediction:Prodigal:002006"
          /inference="similar to AA sequence:RefSeq:CKG86610.1"
          /codon_start=1
          /transl_table=11
          /product="thioredoxin reductase"
          /protein_id="Prokka:HHHABCBJ_00003"
          /translation="MHKGWLFMAEWELAAGILGDIKGFIFALQLSMTGFKARTQAVNF
LLIQLGHEQGFKSLYDSYAYRGLTDGIHKNSLKAQMLKDFSKNPPYDEFGLPFLDEL
IGVDWVIDLNEYDFAYDEAGSIIRALDDDVLKGLKDPDRIDSTPESRLEFEYKRDAY
KNGMLNGYGDNIPSDWTQKEVKLWLDLTLVLQAKLAVLTPPQGYPNAPYYFSPERLEWD
YKNHQLDKLLDPRIPAIYRYNFPRELRAKILKFGEENGIKD"

```

ORIGIN

```

1  tgcttgagtt  cttgctttaa  atcctgtcat  ggaaagttgt  aaggctccta  taaatccttt
61  tatactcct  agtattcctg  ctgctaattc  ccattcacc  ataaataaat  atccatcact
121  taaatgagct  aagcctctat  tagcttctac  ttctttgtaa  agttctttat  agtctttatt
181  gattaaattt  cttttttcat  ctacattaca  ataagcatca  taaggtatat  ctataaccac
241  agatcttaat  ccacttctta  taattaaata  tttatatctt  tctcttttag  tttttaaaga
301  tttataataa  gctttttctg  ctttagtcca  aggagctata  gctcctttga  taggatcttt
361  taaatatatg  ctttgccatt  ctttaaattc  aagcaaagtg  gatttttgcc  ctgtataaaa
421  gttaggatct  agatatattg  gttgatagtc  tttgtatggg  gagttttggt  taatttccca
481  agccttaaaa  aaaactctag  tatattcttt  agtatattta  cctacaggat  caacgctttg
541  tgcaaaatat  atttcttttg  tttttttatc  tacctctact  cctaattccat  taggagcata
601  tatcatataa  gtatcactca  tcttttatcc  tttcttaatt  taacctatat  ataaaccatc
661  ttctatgatt  atagtagtgg  ctagtctgcc  tatgcaatta  ctttaattct  taatgccatt
721  ttcttcacca  aatttgagta  tcttagctct  aagttccctt  gggaaattat  atctataaat
781  agcagggatt  cttggatcaa  ggagtttgtc  taattgatga  tttttataat  cccattccag
841  ctttctggg  ctaaaataat  aaggtgcatt  aggatagcct  tgtggaggag  ttaagaccgc
901  tagtttggct  tgtaaaacta  aagtatctag  ccataatttt  acttcttttt  gcgtccaatc
961  actaggaata  ttatcaccat  agccatttaa  catcccattt  ttataagcat  ctcttttgta
1021  ttcaaattcc  aatctactct  ctggagtaga  gtctatatct  cttggatctt  ttaatttacc
1081  ttttaaaaca  tcatcatcta  aagcccta  aatgctacct  gcttcatcat  aagcaaatc
1141  atattcattc  aatcaatca  cccaatccac  tcctataagc  tcatctaaga  aaggtagcat
1201  tccaaattca  tcataaggag  gattttttaga  aaagtctttt  agcatttgag  ctttaagaga
1261  gtttttgtgt  atgccatctg  ttaaacctct  atatgcataa  gaatcataaa  gacttttaaa
1321  gccttgttca  tgccttagtt  gtatgagtaa  aaaatttact  gcttgagttc  ttgctttaaa
1381  tcctgcatata  gaaagttgta  aggctcctat  aaatcctttt  atatctccta  gtattcctgc
1441  tgctaattcc  cattcagcca  taaagagcca  acctttatgc  atattagcca  tacctctatt
1501  agcttctact  tctttataga  gttctttata  gtctttattg  attaaatttc  cttttctatc
1561  tacattacaa  taagcatcat  aaggtatata  tataacagta  cttctaagtc  cacttcttat
1621  aattaaatat  ttatatcttt  ctcttttggt  ttttaaagat  ttataataag  ctttttctgc
1681  ttttagtcaa  ggagctatag  ctctttgat  aggatctttt  aaatatatgc  tttgccatt

```

//

```

LOCUS      HHHABCBJ_3          1177 bp    DNA        linear      12-APR-2021
DEFINITION Campylobacter species strain strain.
ACCESSION
VERSION
KEYWORDS   .

```

SOURCE Campylobacter species  
 ORGANISM Campylobacter species  
 Unclassified.  
 COMMENT Annotated using prokka 1.14.6 from  
<https://github.com/tseemann/prokka>.  
 FEATURES Location/Qualifiers  
   source 1..1177  
           /organism="Campylobacter species"  
           /mol\_type="genomic DNA"  
           /strain="strain"  
   gene 74..571  
           /gene="trxB\_4"  
           /locus\_tag="HHHABCBJ\_00004"  
   CDS 74..571  
           /gene="trxB\_4"  
           /locus\_tag="HHHABCBJ\_00004"  
           /inference="ab initio prediction:Prodigal:002006"  
           /inference="similar to AA sequence:RefSeq:CKG86610.1"  
           /codon\_start=1  
           /transl\_table=11  
           /product="thioredoxin reductase"  
           /protein\_id="Prokka:HHHABCBJ\_00004"  
           /translation="MLPFIDEIMGVDWVIDLNKYDFAYDEEGRIIWALYNDIKKGLK  
           DPRDVDSTPESRNEFDDAMDGYENGMVTRFDVDTPNWSEQQAALDRDTLVLSAKLAA  
           LTPPQGYPNAPYYFTPERLEWIYKRGYLDKLLDPRIPIAIYRYNFPRELRAKILKFAEE  
           NGIKD"

ORIGIN  
 1 gatacataaa aatcctttaa gggctaaatt agtaaaagat ttagctaaaa ctatacagcc  
 61 tgatgaattt ggtatgctac cttttataga tgagattatg ggagtagatt ggggtgattga  
 121 tttaaataaa tatgattttg cctatgatga agaaggtaga atcatttggg ctttatataa  
 181 tgatattaaa aaaggtaaat taaaagatcc aagagatgtg gattctactc ctgaaagtag  
 241 aatgaattt gatgatgcta tggatggata cgaaaatgga atggtaacta gatttgatgt  
 301 agatactcca aatgaatgga gtgaacaaca agctgcttta gatagagata ccctagtatt  
 361 aagtccaaa ctgcagccc tcactcctcc acaaggctat cctaattgcc cttattattt  
 421 tacacctgaa agattggaat ggatttataa aagaggatat ttagataaac tccttgatcc  
 481 aagaattcct gctatttata gatataattt cccaagggaa cttagagcta agatactaaa  
 541 atttgctgaa gaaaatggca ttaaagatta aagtaatttc ataggtagac tagccactac  
 601 tataatcata gaagatggtt tatatatggg ttaaattaag aaaggataaa aatgagttaa  
 661 acttataaaa tttatacacc caatggatta gcattagatg tggaaaaaga taccaataaa  
 721 atactattta aagaaaatat taaaccaca ggcaattata ccgaagaata ttccaaagct  
 781 ttgtttgaag cacacgacat taaacgaac tccccctaca aagactataa accaatatat  
 841 ctagatccta acttttatac agggcaaaaa tccactctag tagaatttaa agaatggcaa  
 901 agcatatatt taaaagatcc cattaaggga agcatagctc cttggactaa agcagaaaaa  
 961 gcttattata aatctttaa aactaaaaga gaaagatata aatatctaata tataagaagt  
 1021 ggtataagaa gcactgttat agatatacct tatgatgctt attgtaatgt agatgaaaaa  
 1081 ggatatttaa tcaatgaaga atacgcctat atttatgatg aagttaacaa taataaagaa  
 1141 accctaaaat cttctctttt tagacaagaa tggggta

//  
 LOCUS HHHABCBJ\_4 1010 bp DNA linear 12-APR-2021  
 DEFINITION Campylobacter species strain strain.  
 ACCESSION  
 VERSION  
 KEYWORDS .  
 SOURCE Campylobacter species

ORGANISM Campylobacter species  
Unclassified.

COMMENT Annotated using prokka 1.14.6 from  
<https://github.com/tseemann/prokka>.

FEATURES Location/Qualifiers

source 1..1010  
/organism="Campylobacter species"  
/mol\_type="genomic DNA"  
/strain="strain"

gene complement(440..937)  
/gene="trxB\_5"  
/locus\_tag="HHHABCBJ\_00005"

CDS complement(440..937)  
/gene="trxB\_5"  
/locus\_tag="HHHABCBJ\_00005"  
/inference="ab initio prediction:Prodigal:002006"  
/inference="similar to AA sequence:RefSeq:CKG86610.1"  
/codon\_start=1  
/transl\_table=11  
/product="thioredoxin reductase"  
/protein\_id="Prokka:HHHABCBJ\_00005"  
/translation="MLPFIDEIMGVDWVIDLNQYQFAYDGKGDSTWALYDDIEKGLK  
DPRDVDSTPESRKEFDEETDVYRFGNRMNFASDIRDSRSEESTRLFDDTLILHAKLAA  
LTPPQGYPNAPYYFTPERLEWIYKRGYLDKLLDPRIPIAIYRYNFPRELRAKILKFAEE  
NGIKD"

ORIGIN

```

1 ctagatattt atatctttct cttttggttt ttaaagattt ataataagct ttttctgctt
61 tagtccaagg agctatgctt cctttaatgg gatcttttaa atatatgctt tgccattcct
121 taaattctac tagagtggat ttttgccctg tataaaagtt aggatctaga tatattgggt
181 tatagtcttt gtagggggag tttttcataa tataataaga ttcaaaaacc gctttggaat
241 attcttcggt ataattgcct gtgggtttta tttttcttt aaatagtatt ttattgggat
301 ctttttccac atctaattgt aaccattgg gtgtataaat ctcataagtt tcgctcatta
361 tttatccttt ctttaattta cccatatata aaccatcttc tatgattata gtagtggcta
421 gtctacctat gcaattactt taatctttta tgccattttc ttcagcaaat ttgagtatct
481 tagctctaag ttcccttggg aaattatata tataaatagc agggattctt ggatcaagga
541 gtttatctaa atatcctctt ttataaatcc attccaatct ttcaggtgta aaataataag
601 gggcattagg atagccttgt ggaggagtga gggctgagag tttggcatga agtattaaag
661 tatcatcaa taatctagtt gattcttcac ttctactatc acgaatatca gaggcaaaat
721 tcattctggt accaaatcta taaacgtcag tttcttcac aaattctttc ctgctttcag
781 gagtagaatc cacatctctt ggatctttta atttaccttt ttcaatatca tcatataaag
841 cccaagtaga atcaccttta cgtcatagc caaattgata ctgatttaaa tcaatcacc
901 aatctactcc cataatctca tctataaaag gtagcatacc aaattcatca ggctgtatag
961 ttttagctaa atcttttact aatttagccc ttaaaggatt tttatgtatc

```

//

LOCUS HHHABCBJ\_5 997 bp DNA linear 12-APR-2021

DEFINITION Campylobacter species strain strain.

ACCESSION

VERSION

KEYWORDS .

SOURCE Campylobacter species

ORGANISM Campylobacter species  
Unclassified.

COMMENT Annotated using prokka 1.14.6 from  
<https://github.com/tseemann/prokka>.



```

        /mol_type="genomic DNA"
        /strain="strain"
gene    complement(393..890)
        /gene="trxB_7"
        /locus_tag="HHHABCBJ_00007"
CDS     complement(393..890)
        /gene="trxB_7"
        /locus_tag="HHHABCBJ_00007"
        /inference="ab initio prediction:Prodigal:002006"
        /inference="similar to AA sequence:RefSeq:CKG86288.1"
        /codon_start=1
        /transl_table=11
        /product="thioredoxin reductase"
        /protein_id="Prokka:HHHABCBJ_00007"
        /translation="MLPFLDELIGVDWVIDLNEYQFAYDGDGGSVKALDEKVRQGKLLK
DPRDIDSTPESRKEFDEEANAYTFGNRMNFSSDIRDSRSKESARLFDDLLILHAKLAA
LTPPQGYPNAPYYFSPEQLEDFYKRQVLDAKLDPRIPIAIRYNFPRELRAKILKFGEEN
NGIKD"

```

ORIGIN

```

1 taataagctt tttctgcttt agtccaagga gctatacttc ctttgatagg ttcttttaaa
61 tatatacttt gccaatcttt aaattctact agagtggatt tttgccctgt ataaaagtta
121 ggatctagat atattgggtg atagtctttg tatggggagt ttcttaatat gcgatcacc
181 tcgaagagag cttgagaatg ttgttttagtg tatgtaccat tgctttttgc cgtaaataat
241 attttatttg tatctttttc tacatttaat attgagccat ctggtgtata aatctcataa
301 gtatcactca ttttttatcc tttctttatt taacctatat gcaaaccatt tttcataatg
361 atagtagtag ctagtctgcc tatgaaatta ctttaatctt taatgccatt ttcttcgcca
421 aattttagta tcttagctct aagttccctt gggaaattat atctataaat agcagggatt
481 cttggatcaa gtttagcgtc taaaacttgt cttttgtaa aatcttctaa ttgttcagga
541 ctaaaataat aaggtgcatt aggataacct tgaggaggag tgagggctgc gagtttgga
601 tgaagtatca aaaggtcatc aaataatcta gccgattctt tacttctact atcgcgaata
661 tcagaggaaa aattcattct attaccaaaa gtataagcat tagcttcttc atcgaattct
721 ttcttgctct ctggagtaga gtctatatct cttggatctt ttaatttacc ttgtcttact
781 ttctcatcta aagccttaac actaccgcca tcaccatcat aagcaaattg atattcattc
841 aatcaatca cccaatccac tcctataagt tcatctagaa aaggtagcat ac

```

//

LOCUS HHHABCBJ\_7 849 bp DNA linear 12-APR-2021

DEFINITION Campylobacter species strain strain.

ACCESSION

VERSION

KEYWORDS .

SOURCE Campylobacter species

ORGANISM Campylobacter species

Unclassified.

COMMENT Annotated using prokka 1.14.6 from  
<https://github.com/tseemann/prokka>.

FEATURES Location/Qualifiers

```

source    1..849
           /organism="Campylobacter species"
           /mol_type="genomic DNA"
           /strain="strain"
gene      114..656
           /gene="trxB_8"
           /locus_tag="HHHABCBJ_00008"
CDS       114..656

```

```

/gene="trxB_8"
/locus_tag="HHHABCBJ_00008"
/inference="ab initio prediction:Prodigal:002006"
/inference="similar to AA sequence:RefSeq:CKG87041.1"
/codon_start=1
/transl_table=11
/product="thioredoxin reductase"
/protein_id="Prokka:HHHABCBJ_00008"
/translation="MLKDFAKNPPYDEFGMLPFLDELIGVDWIDPNRYRFAEDEKGR
VNDALKDDVEKGILKDPDIDSTSESRLEFEYKLDAYRNGMKTRFDGDNPNHWSKEQV
ERFNDTLILCAKLAALTPPQGYPNAPYYYSERLEFIYKHKHKLKDKPRIPAIYRYN
FPRELRAKILKFGEENGIKD"

```

ORIGIN

```

1 taaatTTTTT actcatacaa ctaggacatg aacaaggctt taaaagtctt tatgattcct
61 atgcatatag agatttaaca gatggcatac acaaaaactc tcttaaagct caaatgctaa
121 aagactttgc taaaaatcct ccttatgatg aatttggtat gctacctttt ctagatgaac
181 ttataggagt ggattgggtg atagatccaa ataggatcgc atttgcagaa gacgaaaaag
241 gaagagttaa tgatgctcta aaagatgatg ttgaaaaagg aatactcaaa gatccaagag
301 atatagattc tacttcagag agtagattgg aatttgaata taaattggat gcttatagaa
361 atggaatgaa aactagattt gatggagata atccaaatca ttggagtaaa gagcaagtag
421 aaagatttaa tgatactttg attttatgtg ccaaactcgc agccctcact cctcctcaag
481 gctatcctaa tgcaccttat tattactctc ctgaaagatt agaatttatt tacaaaaaac
541 acaaacttga taaattaaaa gatccaagaa tccctgctat ttatagatat aatttcccaa
601 gggaacttag agctaagata ctcaaatttg gcgaagaaaa tggcattaaa gattaaagta
661 attgcatagg cagactagct accactataa tcatgaaaaa tggtttatat ataggttaaa
721 ttaagaaagg ataaaagatg agtgatactt atgagattta tacaccacat ggttccatat
781 tagatgtaa taaaaaaact aatgaaatat attttgatca aagttccaaa cccacaggaa
841 aatatacca

```

//

>>BfR-CA-15867\_min\_cov\_30 putative plasmid location

```

LOCUS      NLMJPNJI_1          24409 bp    DNA        linear      12-APR-2021
DEFINITION Campylobacter species strain strain.
ACCESSION
VERSION
KEYWORDS
SOURCE     Campylobacter species
ORGANISM   Campylobacter species
           Unclassified.
COMMENT    Annotated using prokka 1.14.6 from
           https://github.com/tseemann/prokka.
FEATURES   Location/Qualifiers
           source          1..24409
           /organism="Campylobacter species"
           /mol_type="genomic DNA"
           /strain="strain"
           gene           159..1055
           /locus_tag="NLMJPNJI_00001"
           CDS            159..1055
           /locus_tag="NLMJPNJI_00001"
           /inference="ab initio prediction:Prodigal:002006"
           /inference="similar to AA sequence:RefSeq:AAW35468.1"

```

```

/note="conserved domain protein"
/codon_start=1
/transl_table=11
/product="hypothetical protein"
/protein_id="Prokka:NLMJPNJI_00001"
/translation="MIVSFLDDDDIDKPYVSSSLYNGTNPVSLVNLFPNDHQTSLSKTI
GVNEEGYNELTSLNIKDKEQIYLKAQKDYDELVQHNFTQRILNDKDSKVDGIYNERIK
KVHTQTIDLAKNVVGAEYLINVGLSKDTIVGLSNTLVNGVDNKVRIAKNSHEFVGEN
KDIEIGANQNTIIHKDEIRNVKGNKKEVVEGHYDINIKETLKIQTEKETSIRSKNNLL
ITTNASMGFETDKNNTFVSDNSLSQTKTDYEVKAGNQILHQVGDQIVTKKDCVIIKA
GGVEVIIDSNGLVVKGGELKAE"
gene 1055..3046
/locus_tag="NLMJPNJI_00002"
CDS 1055..3046
/locus_tag="NLMJPNJI_00002"
/inference="ab initio prediction:Prodigal:002006"
/inference="similar to AA sequence:RefSeq:CKG88019.1"
/codon_start=1
/transl_table=11
/product="hypothetical protein"
/protein_id="Prokka:NLMJPNJI_00002"
/translation="MEALNQKNSLNIRLLSSNNILLHNQEFKLYEIAQGNKNEIKTIF
TTNRIGEHLNASEIFSKEAQSFELILNQSSVYKNKPIYNHRFLLRNYEYGHWCIEKF
ERKADKGSINSIRLKSKEFTLENNEKIVRNFYTFGDIVEFEAIYEDTKIKKEEQIKWGY
VFIQDKNTLDKLNKNQLTNDKKESLLDEEILKDCFYIEKEEDKALLSSSIIYRHLN
NKAYCGKHLSQLPNPKDTQEQKALLVFAYKEIPNYNASYLIRINDYPQITIDCTLAE
TLRAHTNKDEISRLGWGVSYICQRLWHDNPSDAKELKDLTFRSSTSQDFIDTIPNETM
KTIVKEILPRVEMQQLKTDNTKSRDKARFYAELDWDNFYMKFSIMQELKGEYMNLLKLL
FGEESDFQKFEDFLNDTLIDIKNIKNTQEYTMALNIQAMKENKTKNAEVFKLYKKEE
TLPETHKAIKDLQKPSDIIDNSLYQRFDIKNDVFLPHLGLSKFADFSLQNSIQHEKE
VLDKFHSNPKYQNFALYSIAGAFNILYIPSLIQITRVTRFYNYHSLYAACKKVRAFI
IDTVNFNNNGSDQPIGAWDYEKVGFDLYNSIMQYRNTKFHFKYTSPKSFLFPLYNSDF
LTKQYFNLGLDFFLYSSTFLDMDFSHMQMQDTAFIVGK"
gene 3048..3659
/locus_tag="NLMJPNJI_00003"
CDS 3048..3659
/locus_tag="NLMJPNJI_00003"
/inference="ab initio prediction:Prodigal:002006"
/inference="similar to AA sequence:RefSeq:CKG88032.1"
/codon_start=1
/transl_table=11
/product="hypothetical protein"
/protein_id="Prokka:NLMJPNJI_00003"
/translation="MFFAGGDYEPFIYGLSLIAYYFLPLYCLTLLLYKYKPQYVNLAL
HIGASVLLYLAMWVIFVDTTIISLFEIFQMFLIPIILQIIHLTFILYAIITYYFDMQK
ISFTKRLGRYIVSFFIGIGLLILSFVMMYAIGYYISSWCDRYLLKIDERNEAIRTITF
YVLVVVFPSSIALLLSYILYKNHKSFFTKILYRILSMIGKDKP"
gene 3659..3820
/locus_tag="NLMJPNJI_00004"
CDS 3659..3820
/locus_tag="NLMJPNJI_00004"
/inference="ab initio prediction:Prodigal:002006"
/codon_start=1
/transl_table=11

```

```

        /product="hypothetical protein"
        /protein_id="Prokka:NLMJPNJI_00004"
        /translation="MQKLIYQNHQYQQIQIQQTQKHFNLGCDFRILTSTFKDIEVCSF
        SMPISIKVD"
gene      4062..4301
        /locus_tag="NLMJPNJI_00005"
CDS      4062..4301
        /locus_tag="NLMJPNJI_00005"
        /inference="ab initio prediction:Prodigal:002006"
        /codon_start=1
        /transl_table=11
        /product="hypothetical protein"
        /protein_id="Prokka:NLMJPNJI_00005"
        /translation="MDSVSIVFLGAMIFNIYSTIYLLLFKFLSNNNQNIFFPSKKEKYC
        LFGLNLLFSLLFYAIWFAAFEYDLADKVVKFFNGV"
gene      4304..4561
        /locus_tag="NLMJPNJI_00006"
CDS      4304..4561
        /locus_tag="NLMJPNJI_00006"
        /inference="ab initio prediction:Prodigal:002006"
        /codon_start=1
        /transl_table=11
        /product="hypothetical protein"
        /protein_id="Prokka:NLMJPNJI_00006"
        /translation="MNGAKLLDNIKPSDLKRSQMIFYGIANKEFGIEYKLSKERSNQ
        VIALYALSGKFQIYYVLDSFEVERMNEKEIUIYPTQIESWY"
gene      4710..5153
        /locus_tag="NLMJPNJI_00007"
CDS      4710..5153
        /locus_tag="NLMJPNJI_00007"
        /inference="ab initio prediction:Prodigal:002006"
        /inference="similar to AA sequence:RefSeq:CKG88076.1"
        /codon_start=1
        /transl_table=11
        /product="hypothetical protein"
        /protein_id="Prokka:NLMJPNJI_00007"
        /translation="MTDGFGLAYVFTLPVLILGGISCVIVFLIRFQSFQCGFVCSKS
        FWIAWLPYLLFLIICITCEWELLTMYICGISLPLVYFLRKFQSHLNLAPNEFSL
        WIIPMSIFSLCIHSSLCVAIAWVLIFFQTNYDTQALQFWLRFLFI"
gene      5237..5707
        /locus_tag="NLMJPNJI_00008"
CDS      5237..5707
        /locus_tag="NLMJPNJI_00008"
        /inference="ab initio prediction:Prodigal:002006"
        /codon_start=1
        /transl_table=11
        /product="hypothetical protein"
        /protein_id="Prokka:NLMJPNJI_00008"
        /translation="MQKILIVLGLCLMLAISANAETNNKANSTHATHLNKWLGTYTLLQ
        ENLYMGSFTIKKCDKFNICEARYEAILNKSEFNDMHECDITLKLQIKSPQEAIALNDD
        KDFANCKIYIRKNQQGIVFIRDEKVFNSPDYFCSTMCGNQTI FEWGDIYKKEMQ"
gene      5707..6111
        /locus_tag="NLMJPNJI_00009"
CDS      5707..6111

```



```

/locus_tag="NLMJPNJI_00009"
/inference="ab initio prediction:Prodigal:002006"
/codon_start=1
/transl_table=11
/product="hypothetical protein"
/protein_id="Prokka:NLMJPNJI_00009"
/translation="MLYDVKRLNENDYKKECAKLLIAFENPNYKQENAIHITGNVTIG
YGLDLKTGNPKLLLEGYLPDDSKLKGDEELTFYEIIEKYRANKAGFTDPKIVKGY
LQNKVFNFSLTQEQAQEILERTFDSYKKYISQ"
gene 6433..7029
/gene="tssI1"
CDS 6433..7029
/gene="tssI1"
/locus_tag="NLMJPNJI_00010"
6433..7029
/gene="tssI1"
/locus_tag="NLMJPNJI_00010"
/inference="ab initio prediction:Prodigal:002006"
/inference="similar to AA sequence:RefSeq:A0H52008.1"
/codon_start=1
/transl_table=11
/product="type VI secretion system, secreted protein"
/protein_id="Prokka:NLMJPNJI_00010"
/translation="MLLASDREKLNLANEKYPFYRLGGIGISAFEKLVGLSNTLNVG
DNKVRIAKNSHEFVGENKDIEIGANQNTIIHKDEIRNVKGENKLLIEKSLTQTIEKEF
FLNVHQNLSAHIQDNTSLKSNSMQTKIEEQYSLESENSTFDFTDSEVKAGNQLHQV
GDTQIVTKKDCVIIKAGGVEVIIDSNGLLVVRGGEIKAE"
gene 7046..7684
/locus_tag="NLMJPNJI_00011"
CDS 7046..7684
/locus_tag="NLMJPNJI_00011"
/inference="ab initio prediction:Prodigal:002006"
/codon_start=1
/transl_table=11
/product="hypothetical protein"
/protein_id="Prokka:NLMJPNJI_00011"
/translation="MSEINNTEIKEQDTQDEIIWEGKKHIPSFLFFWITYIVLLCLF
LYLFPRLFNPSKEIDYKWFIVFFTFLLGIYAFARAIYKMANIKRIYITKEKLVIEYYI
KNDLVFPLGTFVYRKISYSLSPGHIVIHTFGDKAKEYLEHGLFSDGDDPTKDCFER
INAIKPHVMPYLLSLSDEEFKIFFHVNATSEINTTFLKEAMELRKEKKDE"
gene 7677..9263
/locus_tag="NLMJPNJI_00012"
CDS 7677..9263
/locus_tag="NLMJPNJI_00012"
/inference="ab initio prediction:Prodigal:002006"
/codon_start=1
/transl_table=11
/product="hypothetical protein"
/protein_id="Prokka:NLMJPNJI_00012"
/translation="MNENIYGSLEFYKQSTPSDKRDLGVFGDVAPYALGITEGFA
TKAFEKEIVKFGIKHNSRIATMMHSKIIMNFGILNFFLAKAEGKSNVRALTETSVGVS
ITIIIMNETPIGATIEKGSEHVAKQTLTQTSRVASNAATKIAGSRVASNIAARAGVSIL
SRIAAGTATGAAVGSSFPVIGTVVGAVVGTLVAGFFNDLIFGDEDEELKKQEEAKEKY
LEEKLDEKMHKIINYLIHQYIELRVLNEDEAEKLCKEISDINSAYFKTILLMLSPY
YLDKDEQSYKEAQEKNPITIRIQPIANALNIKIEINECF LAKNGEALKNKEIYVYNHR
FDRVTKAMSDDEGKIVFENVYVGKESTIDKISFIIDRENFNEDNFYESVLKYAPMFN

```

VQKKHKQEGQAFIGKMFSSFTYAQEIMQDNEVLKLEALRNNFHIVFDYEVKQEEESYK  
NYIILSYLVFDVKEDIEEYIRHTTIENRAFRLGLELLGRGWKNQYSIKDEWRDKGVVFL  
LILILKNLLLIKWWLLTSL"

gene 9239..9460  
/locus\_tag="NLMJPNJI\_00013"

CDS 9239..9460  
/locus\_tag="NLMJPNJI\_00013"  
/inference="ab initio prediction:Prodigal:002006"  
/codon\_start=1  
/transl\_table=11  
/product="hypothetical protein"  
/protein\_id="Prokka:NLMJPNJI\_00013"  
/translation="MAFIDKPIVILDIEKFDKENILEDIKFHFKTLAKAYKIFVIDLD  
ANTQIKAGGVEVIIDSNGLVVKGSELKAE"

gene 9471..10286  
/locus\_tag="NLMJPNJI\_00014"

CDS 9471..10286  
/locus\_tag="NLMJPNJI\_00014"  
/inference="ab initio prediction:Prodigal:002006"  
/codon\_start=1  
/transl\_table=11  
/product="hypothetical protein"  
/protein\_id="Prokka:NLMJPNJI\_00014"  
/translation="MKKPFYKLKRFYIPCIIIIIFAVLAKLLYSPLYTIYWGMYP  
KVQLEFKNFKMTLNPSPKDMIKIVDDYQPKLEDFKDLNTKMQKAIKDFKVAKLFGE  
DRYFEAFIKSCAGNFVVLHGKEQIYFNLFISGINSTSNEKQKYLNLRASTRDLERQ  
IFEEKLKFIKHYEEFYDYLEGVGYLDKGTEYIGTAISFKTLIQNVFLSNNAQLCSFED  
RNLMFKMKENYEIFKNLDVKNIDDLKRNIIYKILIDMENLLNETQKALDECK"

gene 10273..10401  
/locus\_tag="NLMJPNJI\_00015"

CDS 10273..10401  
/locus\_tag="NLMJPNJI\_00015"  
/inference="ab initio prediction:Prodigal:002006"  
/codon\_start=1  
/transl\_table=11  
/product="hypothetical protein"  
/protein\_id="Prokka:NLMJPNJI\_00015"  
/translation="MNANENNTSVNNENNTTINFEESIKEALREGQEIVESGKGR"

gene 10402..10749  
/locus\_tag="NLMJPNJI\_00016"

CDS 10402..10749  
/locus\_tag="NLMJPNJI\_00016"  
/inference="ab initio prediction:Prodigal:002006"  
/codon\_start=1  
/transl\_table=11  
/product="hypothetical protein"  
/protein\_id="Prokka:NLMJPNJI\_00016"  
/translation="MSIYKECEVCKTKINKLQNIWNIFSGKLEIKCKNCKSKYGVSSK  
IIDWIYFLFFENLLFPPIVILNLYLGRYFSKYGLFEMIFYLSIAILLSRKSVNII  
LLLCKLKRLENDK"

gene 10739..13342  
/locus\_tag="NLMJPNJI\_00017"

CDS 10739..13342  
/locus\_tag="NLMJPNJI\_00017"

```

/inference="ab initio prediction:Prodigal:002006"
/codon_start=1
/transl_table=11
/product="hypothetical protein"
/protein_id="Prokka:NLMJPNJI_00017"
/translation="MTNKGLIEHLKDAKDSAVDFYIGLYDFGDFLARISGFKDWQEKSVFDDFYKKQAFEELGFLEDVLEKNETSRNIILEYLIKDVNERPLYYLAPSSILKIISKTTKAKTIPTIGLISLSGKATSTAHSLYPYKNIQNSFTPLCSIDNKNSNLLKEFNFDSSFCNFYNNNIFNQSLKHLNNIQNEKEYINEYKIFLENLNYFNQYNNYKLVSIQVINNLKIAIYIQKLSLQDINNININSELYLLKALYFCEDYVLFDKDKQALFNKNTIKELEFDSFYTIFVSHKAKLNDTYLQARKELYKSINEFKRLGFKDLENAYQTYIHSLIVNKEINSKDKTINKNENKEINKNLNQDENSQESNIKENASNTKKEDFNLLSSHSKLNLFHILENKDKNKRIIFLNASSMSNLHIYDNNCDVFIKNSLLDIKKIEKEYDIKFEFNTRVFFYEKLLLGAKENNEFLFEEKEENLLYHFYKDKEDLSSLDLSIKYNIYNARIKNYSLLEESLNIKLEPKELKKEIAYNNASFNKLKKEPLNEFSSSAKEPCFITLYLKDEHNKPIANAKIIIKGFQHNEALRVNLRKRSDEKGIKIRFDKEKYFSDCYSFKVKLDESKAYFPTPLQNAKRIFNNYTHHKVGLILKFKAKDHLVYDGFNVYHYKGNELINSYMARSGTAKADNEKRSKKQIAHYFYQDEKDKSKSGKAYFYYDESIQDRFGTLPEGEYYLKINEIAKDTKPNFLKDYPFEIGKTWGRYCVRLYTDKECSKTKEIEIKESNEKENKTSKKDKKEQSIIKDNLYLYSINEKGEFGSSGSIGIAQAQLLEDLSKQVKFIRSEKENIISLKVAYPEKIDNKIIFVGKVE"
gene 13335..14090
/locus_tag="NLMJPNJI_00018"
CDS 13335..14090
/locus_tag="NLMJPNJI_00018"
/inference="ab initio prediction:Prodigal:002006"
/inference="similar to AA sequence:RefSeq:CKG88360.1"
/codon_start=1
/transl_table=11
/product="hypothetical protein"
/protein_id="Prokka:NLMJPNJI_00018"
/translation="MNKTLIFHENSIDLNASFAPGTIYELQLEKESDKTLNWSYVECNSEKMRYLDDTCHSIEAKDLKFIDSFKGNICGFHLPISRDNPTKDIKDYKYIIVFAYDEKKAIPSLEDFHIVIDMSFRAGVKGDESVEESKLRNDFNSDIIQTNCIFSVFEAVEFLKACQSLKEEKNEIDNYIFFKNYPQLAGKIAIYYRFDLANEEFIKSVSDGNKYLKEREKFKVAVSDVYIKNPIYKMGFEKTSKSSC"
gene 14059..14592
/locus_tag="NLMJPNJI_00019"
CDS 14059..14592
/locus_tag="NLMJPNJI_00019"
/inference="ab initio prediction:Prodigal:002006"
/inference="similar to AA sequence:RefSeq:CKG88360.1"
/codon_start=1
/transl_table=11
/product="hypothetical protein"
/protein_id="Prokka:NLMJPNJI_00019"
/translation="MRKKLQNVVDINIVKDFLKDFAKRLGIDEKVLPIVIGYNPQRGDSGTYDYTVNTLDLNPKASYVDFIDTIIHEFRHFYIYCIKNNKNSIEKLLYLDVMVQFYIPWNFYKIFNSYDKKCLIIDNEDETKKCLKNRTYYGSWKFNLNPTLDLLPSPLYLQPS ELDSRIMAYYFRKEIKL"
gene 14592..15857
/locus_tag="NLMJPNJI_00020"
CDS 14592..15857
/locus_tag="NLMJPNJI_00020"

```

```

/inference="ab initio prediction:Prodigal:002006"
/inference="similar to AA sequence:RefSeq:CKG88389.1"
/codon_start=1
/transl_table=11
/product="hypothetical protein"
/protein_id="Prokka:NLMJPNJI_00020"
/translation="MTPPSLPDVEKHEDFLQTRKEPYAIYLAINIKNISYNNICPSEK
YFWKFDNMNELDKWYNPKFGIYLGKIVFDKKNKLIIPKYIAAKFENLEEEVKKIKNPL
WLANKNPNIIEPKFYDGMSSGGYFESPNNLEYQCKIEKDTQVLSQEQIISYVKELYSK
NTIIIKNYIDAINKDYGIKPFVFSDEIYDELGEVGILTKEQANNFKDKSYIKKDPILL
AMLDYLAKQNKDEDYLITFDDEYFYTYLVWSLKDFLLELSYGLFQDETELLFNPAAY
MDDTKIYYQNLNEEINKRYEKILLNMGFEGENGYFKDYDYDYGFGNNGIFEFISIYDYFA
YDEIGVQPIQQSPYVPPKSPFDSPNFVYSYDGNHGDACLVPKALGKYYFELLYQKEIY
IELLRPYPSIKDLPEGWDMLEKANLK"
gene 16413..16619
CDS   /locus_tag="NLMJPNJI_00021"
      16413..16619
      /locus_tag="NLMJPNJI_00021"
      /inference="ab initio prediction:Prodigal:002006"
      /codon_start=1
      /transl_table=11
      /product="hypothetical protein"
      /protein_id="Prokka:NLMJPNJI_00021"
      /translation="MNALGRYVFYSEKAYINEKIIFDKLSRICDPSENYLVGCNIGAI
QDTYEIQPNERDPRYVETLIGRSL"
gene 16632..16802
CDS   /locus_tag="NLMJPNJI_00022"
      16632..16802
      /locus_tag="NLMJPNJI_00022"
      /inference="ab initio prediction:Prodigal:002006"
      /codon_start=1
      /transl_table=11
      /product="hypothetical protein"
      /protein_id="Prokka:NLMJPNJI_00022"
      /translation="MKTIKIPLKDYISNIREDKTIYLGQLQSDMSIKGLDKEFLKKNII
LREISNLKQAFI"
gene complement(17176..17394)
CDS   /locus_tag="NLMJPNJI_00023"
      complement(17176..17394)
      /locus_tag="NLMJPNJI_00023"
      /inference="ab initio prediction:Prodigal:002006"
      /inference="similar to AA sequence:RefSeq:AVL47240.1"
      /codon_start=1
      /transl_table=11
      /product="recombinase XerC"
      /protein_id="Prokka:NLMJPNJI_00023"
      /translation="MQINDIKTTFLINFLNYLENNLKNKSLKRTKITYLRVLTSSF
ISDNNDDLFLFSFDMKGLGLKQKKS"
gene 17775..18647
CDS   /locus_tag="NLMJPNJI_00024"
      17775..18647
      /locus_tag="NLMJPNJI_00024"
      /EC_number="3.6.1.-"
      /inference="ab initio prediction:Prodigal:002006"

```

```

/inference="similar to AA sequence:RefSeq:ABS44566.1"
/codon_start=1
/transl_table=11
/product="F-box only protein 18"
/protein_id="Prokka:NLMJPNJI_00024"
/translation="MDEAQDINACVIDIVLNQKQAKKVFIGDTFQSIYKFRGAVNSLE
ILASMPKSHTLYLTQSFRCQNIAFIANSYLKILNAPQDFKGTKKSSNENVKNEAKAI
VCRTNAKLFDAVENLDKKLFFVGGINSYSFDELLELDIQNLLFKKHEYIKNQFIVKFTD
LKELLEYINETKEVDLKRKIFVLFKYAHGDIKLIKAIKSSVKKQEADLILSTGHK
SKGLEWNNVEIIDDFLNIKQELEERDQITIAKEELNLLYVAITRAKNSLSISKDYLL
KEFIQENLERIIIE"
gene 18644..18856
/locus_tag="NLMJPNJI_00025"
CDS 18644..18856
/locus_tag="NLMJPNJI_00025"
/inference="ab initio prediction:Prodigal:002006"
/inference="similar to AA sequence:RefSeq:AVL47291.1"
/codon_start=1
/transl_table=11
/product="helix-turn-helix domain-containing protein"
/protein_id="Prokka:NLMJPNJI_00025"
/translation="MKIIKKLQKDGSLKKQVYYSVHEVAQMHSVTHVTVRLWISRGIL
KGVKLGKGFYMSKEAIIIEFQKNDGLS"
gene 18874..19023
/locus_tag="NLMJPNJI_00026"
CDS 18874..19023
/locus_tag="NLMJPNJI_00026"
/inference="ab initio prediction:Prodigal:002006"
/inference="similar to AA sequence:RefSeq:ARJ53387.1"
/codon_start=1
/transl_table=11
/product="DNA-binding protein"
/protein_id="Prokka:NLMJPNJI_00026"
/translation="MSSIAKDSHVEMRDFLFNKYNKITFSSKECAKILGISLQTLDR
TKDKK"
gene 19693..20613
/locus_tag="NLMJPNJI_00027"
CDS 19693..20613
/locus_tag="NLMJPNJI_00027"
/inference="ab initio prediction:Prodigal:002006"
/inference="similar to AA sequence:RefSeq:ADC28003.1"
/note="conserved hypothetical protein"
/codon_start=1
/transl_table=11
/product="hypothetical protein"
/protein_id="Prokka:NLMJPNJI_00027"
/translation="MEAKGIAIFPTNVAFSCKTNAFFTELEDQFLKEGVGNKSAIKLD
FEYYILYCQFLQIDKESLFFGRNYELVFCFLLYRALLNKNNTQKIVAKIINVIRCQD
RLPEKVHYREKIICMDNQHRDLSQTLSSCIAEFYNSIDLNTFRKNIGFENRKKIAIE
MLNRASEHYGFFGLSRGGITYKEEKISCVPIQALDEFHHGMSHLCAVFLKEDGRYTNL
ERAIPHFKRGMMEVYKTIIRDPMILNKDALGVKQEALKIRELEYQTIGPKTVTKNPT
TNLTNKKEEKVIPGYKELCEKIVSQIKNAK"
gene complement(20713..21741)
/genes="flgS"

```

CDS /locus\_tag="NLMJPNJI\_00028"  
 complement(20713..21741)  
 /gene="flgS"  
 /locus\_tag="NLMJPNJI\_00028"  
 /inference="ab initio prediction:Prodigal:002006"  
 /inference="similar to AA sequence:RefSeq:CAL34921.1"  
 /codon\_start=1  
 /transl\_table=11  
 /product="signal transduction histidine kinase"  
 /protein\_id="Prokka:NLMJPNJI\_00028"  
 /translation="MNENILKSLDSSEKETLQKGLQSLIEQTYIVENEYKILNENYNS  
 LRAMVDEIIEVLPALWILDKEKNIILQNQEALKKPKLLDIISLEKNRDELEFENRFY  
 AVKIIAHNEKTIVSATDISDEKRNERLASMGVAHLAHEIRNPIGSISLLASTLFSR  
 SELKNKHIVLEIQKAIARVERIVNSTLLFTKGVHINASKFNLELLEEESAINSYNY  
 SSQIDFEINFLDMKIYGDKALLSLVLQNLIIYNAIDAIIEESECENPKIKIQASCDEQNL  
 YIRVYDNGCEIKDENLVFEAFKTTKLKGNGLGLSLSKEIINAHKGELKFEIWPKNFYF  
 VLPLHYNS"

gene complement(21738..22559)  
 CDS /locus\_tag="NLMJPNJI\_00029"  
 complement(21738..22559)  
 /locus\_tag="NLMJPNJI\_00029"  
 /inference="ab initio prediction:Prodigal:002006"  
 /inference="similar to AA sequence:RefSeq:CAL34920.1"  
 /note="conserved hypothetical protein Cj0792"  
 /codon\_start=1  
 /transl\_table=11  
 /product="hypothetical protein"  
 /protein\_id="Prokka:NLMJPNJI\_00029"  
 /translation="MAKIFDFYSVFEGFESLDSLNFEEVDVFNIEYLLLKNYLDIKDC  
 FKLDETASYALSLLAKNNRKRFSINRKIQHFKALSTLKYLLRAGIIKLEHSKEAKRVR  
 DKRQKLKKELRSYVIQDKIIFANQFTRFFFYFLKPNEKLILQNRYYEVLTLIKEKFEFEL  
 YQSFQFEQLSRELLEKFKQVSGVQSYWDKNLELDLYYKDDKISFIGEVKFKNKKICRN  
 ILNLELAKSLKLEPNYIIISKNGFSKEFYKICKQDLLLLLDLNDFKILLEENK"

gene 22663..23931  
 CDS /locus\_tag="NLMJPNJI\_00030"  
 22663..23931  
 /locus\_tag="NLMJPNJI\_00030"  
 /inference="ab initio prediction:Prodigal:002006"  
 /inference="similar to AA sequence:RefSeq:CAL34919.1"  
 /codon\_start=1  
 /transl\_table=11  
 /product="putative aminotransferase"  
 /protein\_id="Prokka:NLMJPNJI\_00030"  
 /translation="MQISDLKKEIILKGTLHFDFTASALALKVEKEIAKILPSYAN  
 THSDSSLNSFKTQQIYEQARKDIKTSNLNSDEFALIACGSGSSSAIKKFQELLGIYIP  
 PLVKEKYFEKIDKSTLPLVIVGPYEHHSNELSFREGLCECIRIPLDKKGNIDFEILEK  
 VLKENQHRKIIASFSLASNVGTGILSDYKRISKLVRFKFGIVAFDASSFIPYKNIACKY  
 YDALFISSHKLIGGIGGSGLLAIKKELCGNKPSFAAGGTVDYVSRYSQCYLNEEAL  
 EGGTPGILQLIRASLAFKIKDEIGIEEIEKKEEILKEYFFEKLKTIPHLILYANNIKT  
 RLPIFAFNIKNIISPFDLAYELSKKYHIETRAGCACAGPYGHDLLGLKDNEELKTKPGW  
 LRISLHYTHEKEDIDYFFEALQKSIKLF"

gene complement(23935..24011)  
 tRNA /locus\_tag="NLMJPNJI\_00031"  
 complement(23935..24011)

```

        /locus_tag="NLMJPNJI_00031"
        /product="tRNA-Asp"
        /inference="COORDINATES:profile:Aragorn:001002"
        /note="tRNA-Asp(gtc)"
gene      complement(24033..24108)
        /locus_tag="NLMJPNJI_00032"
tRNA     complement(24033..24108)
        /locus_tag="NLMJPNJI_00032"
        /product="tRNA-Val"
        /inference="COORDINATES:profile:Aragorn:001002"
        /note="tRNA-Val(tac)"
gene      complement(24117..24192)
        /locus_tag="NLMJPNJI_00033"
tRNA     complement(24117..24192)
        /locus_tag="NLMJPNJI_00033"
        /product="tRNA-Glu"
        /inference="COORDINATES:profile:Aragorn:001002"
        /note="tRNA-Glu(ctc)"
gene      complement(24206..24281)
        /locus_tag="NLMJPNJI_00034"
tRNA     complement(24206..24281)
        /locus_tag="NLMJPNJI_00034"
        /product="tRNA-Lys"
        /inference="COORDINATES:profile:Aragorn:001002"
        /note="tRNA-Lys(ttt)"
gene      complement(24285..24361)
        /locus_tag="NLMJPNJI_00035"
tRNA     complement(24285..24361)
        /locus_tag="NLMJPNJI_00035"
        /product="tRNA-Asp"
        /inference="COORDINATES:profile:Aragorn:001002"
        /note="tRNA-Asp(gtc)"

```

ORIGIN

```

1  atactgattc taaagataat acaaacttca caaactcttc taatcattta ccaagcaatg
61  cttataaatc ttatcatcat actccttttt taagagtagc aacaagtata gcaagcaatc
121 attcaggcct ttttcatact ccaagagttg gagatgaagt gattgtttct tttttagatg
181 atgatataga taaaccctat gtgagctcta gtttgtataa tgggaccaat ccaagccttag
241 taaatcttcc ttttaatgat catcaaacct ccctttcttc taaaaccata ggtgttaatg
301 aagaaggtta taatgaactt accctctcaa atataaaaaga taaagaacaa atttatntaa
361 aagcccaaaa ggattatgat gaattagtcc agcataattt cactcaaaga attttaaatg
421 ataaagattc taaggtagat ggaatttata atgaaaggat taaaaagggt cataactcaaa
481 ccatagattt ggctaaaaat gtcaatgtag gggctgaata tttaatcaat gtaggcttat
541 ctaaagatac catagtagga ttaagcaata ctttaaatgt aggagtagat aataaagtaa
601 gaatagctaa aaactctcat gagttttagt gagaaaacaa agatatagaa ataggtgcaa
661 atcaaaatac tattatccat aaagatgaga taaggaatgt gaaggggaat aaaaaggagg
721 tggttgaggg gcattatgat attaatataa aagaacatt aaaaatccaa acagaaaaag
781 agacctctat aagaagcaaa aataatctac taatcaccac caatgcttca atgggctttg
841 aacagataa aaataatacc tttgtatctg ataattcatt atcgcaacaa aaaacagatt
901 atgaagtaaa agcaggcaat caaatcctcc atcaagtagg cgataactcaa attgttacta
961 agaaagattg tgttataatt aaagcaggtg gagtagaagt gattatagac tctaattggac
1021 ttgtggttaa aggtggagag ctttaaggcag agtaatggaa gcactcaatc aaaaaaatag
1081 tttaaatatt aggcttttaa gttctaataa tattcttctg cataatcaag aatttaagct
1141 ttatgaaata gcacagggca ataaaaatga aatcaagact atttttacaa ctaatagaat
1201 aggagaagct catttaaatg ctagtgaat ttttagtaaa gaagcacaaa gctttgaatt

```

1261 aattttaaac caatctagtg tttataaaaa caaacctatc tataatcata gattttttatt  
1321 aagaaattat gagtatgggc attggtgtga aataaaatftt gaaagaaagg cagataaagg  
1381 ttctataaac tctattaggc taaaatccaa agaatttacc ttagaaaata atgaaaaaat  
1441 agtgcgtaat ttctataactt ttggtgatat agtagaattt gaagctatftt atgaggatac  
1501 aaaaatcaaa gaagagcaaa ttaaattgggg ttatgtttttt attcaggata aaaacacctt  
1561 agataagtta aacaaaaacc aattaactaa tgacaaaaaa gaaagtftctt tgcttgatga  
1621 agaaattftta aaagattgftt tttatattga aaaagaagaa gataaagccc tattatcttc  
1681 ttctatcatt tatagacatt tagaaaacaa caaagcttat tgtggaaaac atcttagftt  
1741 gcaactacca aaccctaaag acacacaaga gcaaaaagcg ctattagtct ttgcttataa  
1801 agaaatacc aattataatg cctcttatct tataagaatt aatgattatc cacaaattac  
1861 cattgattgc actctagcag aaacactaag ggacacataca aacaaagatg aaatctcaag  
1921 gcttggttgg ggggtaagct atatctgtca aagattatgg catgataatc caagtgatgc  
1981 taaagaatta aaagattftaa cctttagaag ctctacttcg caagattftta tagatactat  
2041 ccctaatgaa acaatgaaaa caatagtaaa ggagatattg cctagagtag agatgcaaca  
2101 attaaagact gacaacacaa aatcaagaga taaagcaaga ttttatgctg aattagattg  
2161 ggataattftt tacatgaagt tctccataat gcaagagcta aaggcgagat atatgaatct  
2221 caaaaagctt tttggagaag aatctgattt tcaaaaacaa ttcgaagatt ttcttaatga  
2281 tactttacta gatataaaaa acattaaaaa tacacaagaa tatacaatgg cactcaatat  
2341 ccaagcaatg aaagagaata agacgaagaa tgcagaagtc tfttaagctat ataaaaaaga  
2401 ggaaacactc ccagaaactc ataaagctat aaaagactta caaaaacat cagatattat  
2461 cgataatagt ttatattfttc aaaggfttga tataaaaaat gatgtgfttt taccgcattt  
2521 aggcttaagt aaatttgatg cattfttcatt gcaaaaactc atacaacatg aaaaagaagt  
2581 tfttagataaa ttccactcta acccaaaata caagcagaat tftgctctat actctatcgc  
2641 aggggctftt aatatctftt atataccaag cfttatacaa atcacgagag ttacaagatt  
2701 ctataattac cattctftt atgctgcgtg caaaaaggftg cgtgctftta tcattgatac  
2761 tgtgaattftt aataataatg gtagcgatca gcctattggg gcatgggatt atgagaaggft  
2821 aggattftgat ttatataatt cgataatgca ataccgaaat acaaaatftc atftftaaata  
2881 tacctacca aatcattct tatttccctt atataattca gactfttctaa aaacaaaaca  
2941 gtattfttaat ctaggcttag atftctfttt atatagctct acattftttg atattggatt  
3001 tagtcatatg caaatgcaag atactgctft tatagtgggg aagtaagatg tfttttgctg  
3061 gtggtgatta tgagcctftt atatatgggc ttagtctftt tgcatactat tftctacccc  
3121 tfttattgtct gagcctftta ttgtataaat ataagcctca atatgtgaat cftgctctgc  
3181 atattggagc ttcagtgttg ttatacttag ctatgtgggt aatattftgtc gatacaacta  
3241 ttatcagcct tfttgaaatt tftcaaatgt tfttaatccc cattatcttg caaattatac  
3301 atcttacctt tatactctat gctattatct atacttattt tgatatgcaa aagattftcat  
3361 ttacaaagag actaggcaga tatatcgftt cattftttat tgggattgga ctacttatcc  
3421 tftctfttftg aatgatgtat gctattggat atttatcag ctcatggtgt gatagatatt  
3481 atcttaaaat cgatgagaga aatgaggcga ttcgcactat aactftttat gftctftgtg  
3541 tggftfttcc cagtataatt gcactactcc ttagctatat cctctataaa aatcataagt  
3601 cattftttac taagattcta tatagaatct tatctatgat aggcaaggat aaaccataat  
3661 gcaaaaactt atatatcaaa accacgacta ccaacaaata caaatccaac aaacacagaa  
3721 acattftcaat cftggttftg atftftagaat cfttactftc acattftaagg atatagaagt  
3781 ttgctctftt tcaatgccta taagtataaa ggtggattga taaatattac agattftattg  
3841 ataattctac caaaagcaat tftgatagca tftctfttata gcttftgctat gfttatggctt  
3901 gtgattccag caatattacc atfttattctc acgacattta tccctaaaat aaacaaaata  
3961 ttgcttaaaa atagaagtat tgtfttattgg atftattggca gftfttattc ttatattatt  
4021 tfttattatgg ctcatattat atcgftctft tftaaattfta tatggattct gtatctatag  
4081 tgtftctftg agcaatgatc tfttaatattt atftccacaat atactfttfta tftgftftaaat  
4141 tfttatccaa caataatcaa aatattfttc caagtaaaaa agaaaaatat tgtctctftg  
4201 gcttaaatct tfttattftc ttgctattftt atgcaatatg gfttgcagca tftgaaatg  
4261 atfttagctga caaagtagft aaattctfta atggagtfta acaatgaatg gggctaaact  
4321 cfttgataat ataaaaccta gtgattftaa aagaagccaa atgcaattft atggaattgc  
4381 taataaggaa tftgggatag aatataaact aagctctaaa gaaagatcaa atcaagftt  
4441 agctctftt gcccctctg gtaaatftca aatctattat gtgfttagata gctfttgaagt



4501 agaaagaatg aatgaaaaag aaatagttat ctatcctaca caaattgaat cgtgggtacta  
4561 ggtattatcg actaccaaaa tacgcaatct cactttaatt tggggttggga ttttataatt  
4621 acaagcccaa tatttaaaaa tattaagatt ccaataaatt tggatacaaaa gaatctattg  
4681 aggattatag taaaaagtga ggcgagataa tgactgatgg atttgggttt ttagcatatg  
4741 tctttacatt gcctgtattg attcttggtg gtatatcttg tgtatgtata gtatttttga  
4801 taagatttca aagcttttgt gggtttgtat gttcaaaaag tttttggatt gcttggcttt  
4861 ttccatatta tttattatct ttgattatct gcattacttg tgaatgggag ttattaacaa  
4921 tgtatatctg tggatcttct ttgcctttgg tatatTTTTT aagaaaattt tttatgcaat  
4981 cacatttaaa tctagctcca aacgaatttt cattatggat tatcccaatg agtattttct  
5041 ctctttgtat tcatagtagc ctgtgtgttg ctattgcgtg ggtgttaata ttttttcaaa  
5101 caaattatga tacccaagca cttcaatttt ggcttagatt tctttttata tagctctata  
5161 tttttagata ttgtgctaga ggagtagtta ttatgtttga agcgacaaaa atacggagta  
5221 aattaaagga gttcttatgc aaaagatttt aatagtttta ggattgtgtt taatgttagc  
5281 cattagtgcct aatgcagaaa ctaacaataa ggctaactcc actcatgcaa cacatttaaa  
5341 caaatggctt gggacttata cattacaaga aaatctttat atggggagct ttacaataaa  
5401 aaagtgtgat aagtttaata tttgtgaagc tagatatgag gctatcctaa ataaaagtga  
5461 atttaatgat atgcacgaat gcgatataac tttgaaatta cagataaaaat ctccgcaaga  
5521 agctatagct ttaaatgatg ataaggattt tgcaaattgt aaaatttata ttaggaaaaa  
5581 tcaacagggt attgtattta taagagatga gaaagtattt aattcacccg attatttttg  
5641 tagcacaatg tgtggcaacc aaacgatatt tgagtgggga gatatctata aaaaggaat  
5701 gcaataatgc tttatgatgt taaaaaatta aatgaaaatg attataaaaa agaatgtgca  
5761 aagcttctta ttgcttttga aaatccaaat tacaacaag aaaatgctat acatattaca  
5821 ggcaatgtaa ctattggata tggacttgat ttaaagacag gaaataatcc aaagttactt  
5881 ttagaaggggt atttaccaga tgattctaaa aaacttaaaa taggagatga agaattaact  
5941 ttttatgaaa ttatagagaa atatagagcc aataaggcag gttttacaga ccaaagata  
6001 gtaaaagggt atttacaaaa taaagtgttt aatttttcgc ttacgcaaga acaagctcaa  
6061 gaaattttgg aaagaacctt tgattcatat aaaaagtata tatcacaata acttgttggga  
6121 atatagtcaa gaaaaagctt ccttggtttc tttacattat cacggtagat ttaataatat  
6181 caagataaag cctcaaaaat gctaaaaatc tatttaaaac tagaaagata tagtagcgaa  
6241 gagattttat cacatagagg ggaaattttg aattaacact taataatctt aagattttag  
6301 ataaaaatgg gaataatcat gaaaccataa ctaaaatatt tcttcataat tgtgagaaca  
6361 gaagaattta tgaaagttta aagctagagt atcaagaagg catttataag agtagtttta  
6421 aataatacct ctatgctttt agcaagtgat agggaaaagc ttaatcttgc aaatgaaaaa  
6481 tatccatttt atcggttagg tggatagga atttccgctt ttgaaaaatt agtaggatta  
6541 agcaatactt taaatgtagg agtagataat aaagtaagaa tagctaaaaa ctctcatgag  
6601 tttgtaggag aaaacaaaga tatagaaata ggtgctaact aaaatactat tatccataaa  
6661 gatgagataa ggaatgtaaa gggagaaaat aaattattaa tagaaaaatc ttaacccaa  
6721 acaatagaaa aagaattttt ctttaatgtc catcaaaatt tatccgcca tatacaagat  
6781 aacacatctt taaagtctaa ttccatgcaa acaaagatag aagagcaata ttctttagaa  
6841 tcagaaaatt ctacttttga ctttcaaca gattctgaag taaaagcagg caatcaaatc  
6901 ctccatcaag taggtgatac tcaaattgtt actaagaaag attgtgttat cattaagca  
6961 ggtggagtag aagtgattat agactctaact ggacttgttg ttagaggtgg agagattaaa  
7021 gcagaatgat aactcggaga taaaaatgag tgaataaac aataacacag aaatcaaaga  
7081 gcaagacacc caagatgaaa tcatttggga aggaaaaaag catatacctt cgtttttgtt  
7141 tttttggata acatatattg tgcttttatg tctttttctt tttttttc ctagattatt  
7201 taatcctagc aaagaaatag attataaatg gtttatagtt ttttttacat ttcttttagg  
7261 catatatgca tttgcacgag cgatctataa aatggcaaat attaaaagaa tttatatcac  
7321 aaaagaaaaa cttgtgattg agtattatat caaaaatgat ttggtttttc ctttaggaac  
7381 tttttttgtg tattatcgta aaatttcata ttcactttct ccaggacata tagtgataca  
7441 tacctttgga gataaggcca aagaatacct tgaacatggt ttattcagtg atggcgatga  
7501 tccaacaaaa gattgttttg aaagaattaa tgccattata aaacctcatg taatgcctta  
7561 tttattaagc ttaagtgatg aagaatttga aaaaatcttt ttccatgtaa acgctactag  
7621 tgaaattaat accactttcc ttaaagaagc aatggaactc agaaaagaga aaaaagatga  
7681 atgaaaacat ttatggaagt ttagagtttt attctaaaga aactcaaagc actcctagtg

7741 ataaaagaga tttaggagta tttggagatg ttgctcctta tgccttaggc attacagaag  
7801 gttttgctac taaagctttt gaaaaagaaa tagtgaagtt tggcataaaa cataattcgc  
7861 gtattgcgac aatgatgcat tctaaaataa taatgaattt tggaaatattg aatttttttc  
7921 tggctaaagc agagggaaaa tccaatgtaa gagctttgac tgaacaagc gttgggtgta  
7981 gtatcactat aatcatgaat gaaactccta ttggagcaac aatagaaaaa ggtagcgaac  
8041 atgttgccaa gcaaacctta actcaaacta gcagggttgc ttctaatagcc gcaaccaaga  
8101 tagctggctc aagagtagca tctaatatcg cagctagagc tggcgtatcc atactttctc  
8161 gtattgccgc aggtacagca actggagcag ctgtaggctc gagctttcct attgttggga  
8221 cagtgggtggg tgcagtgggtg ggaacacttg tagcagggtt ttttaatagac ttaatttttg  
8281 gcgatgaaga tgaggaatta aaaaaacaag aagaagccaa agagaaatac ttagaggaaa  
8341 aattagatga aaaaatgcac aaaatcatca attatctcat cactcatcag tatatagaat  
8401 taagagtgtt aatgaagat gaagcagaaa agctttgtaa agaaataagt gatattaata  
8461 gtgcttattt taaaaccatt cttttgatgc taagttttcc ttattattta gataaagatg  
8521 agcaaagtta taaagaagct caagaaaaaa atccaactat aatcagaata caaccatag  
8581 ctaatgcctt aaatataaaa atagaaatca atgaatgctt tcttgctaag aatggagaag  
8641 ctttaaaaaa taaggaaatt tatgtttata atcatcgctt tgatagagta gtaacaaaag  
8701 ctatgagtga tgatgagggt aaaatagtat ttgaaaatgt ttatgtgggt aaagagagca  
8761 ctatagataa aataagcttt attatagaca gagaaaattt caatgaagac aatttttatg  
8821 aaagtgtttt aaaatacgct ccaatgttta atgtccaaaa aaagcataag caagaaggac  
8881 aagcttttat tggtaaaatg ttttttagct tcacttatgc acaagaaata atgcaagata  
8941 atgaggtgtt aaaactagag gctttaagaa ataattttca tatcgttttt gattatgaag  
9001 taagaaaaca agaagaatcc tataaaaatt atatcatttt atcttatttg gttttgatg  
9061 ttaaagaaga tatagaagaa tatatacgcc atactactat agaaaataga gcttttcgtg  
9121 gattagaatt gttaggtcgt ggatggaaaa atcaatacag catcaaagac gaatggagag  
9181 ataaggggtg ggtttttttg cttattttaa ttctcaaaaa tttactcctt ataaaaaat  
9241 ggcttttatt gacaagccta tagttatttt agatatagaa aaatttgata aagaaaatat  
9301 actagaagat ataaaattcc attttaaaac tcttgctaaa gcctataaaa tttttgtaat  
9361 agatttagat gctaatactc aaattaaagc aggtggagta gaagtgatta tagactctaa  
9421 tggacttgtg gttaaagggt gagagcttaa ggcagagtaa aggataagca atgaaaaaac  
9481 ctttttacia acttaaaaga ttttatatac cttgtataat aattattata atatttgccg  
9541 tgcttgcaaa attactttat tctcctttat atacgattta ttggggaatg tatcattatc  
9601 ctaaagttca actagaatth aaaaactttg aaaaaatgac tttaaatcca agccctaagg  
9661 atatgattaa aattgtagat gattaccaac ctaagctaga agattttaaa gatttaaaaca  
9721 caaaaatgca aaaggctatt tttgatttta aggtggctaa attatttgga tttgaggata  
9781 ggtattttga agcttttatt aaaagctgtg ctggtaactt ctttgtttta catggtaaaag  
9841 aacaatttta ttttaattat ctttaattca taagcggat aaattcaact tccaatgaaa  
9901 agcaaaaata tctaaactta agagcatcaa ctagagattt agaaagacaa atttttgaag  
9961 aaaaacttaa atttataaaa cattatgaag aattttatga ttacttagag ggtgtagggt  
10021 atttggataa gggaacagaa tatataggta cggcaatttc ttttaaaaca ttgattcaaa  
10081 atgtattttt gtctaataat gctcaattat gctcttttga agatagaaac ttaatgttta  
10141 aaaacatgaa agaaaattat gaaatattta aaaatttaga tgtaaaaaat atagatgatt  
10201 taaagagaaa tatctataaa aaaatattaa ttgatatgga aatctccta aatgaaacc  
10261 aaaaggcttt agatgaatgc aatgaaaat aataccagt ttaataatga aaataacacc  
10321 actatcaact ttgaagaaag cataaaagaa gctttaagag aggggcaaga aattgtagaa  
10381 agtggcaaag gaataagata aatgtctatt tataaagaat gtgaagtttg taaaacaaaa  
10441 atcaataaat tgcaaaatat ttggaatata ttctcaggca aattagaaat aaaatgtaaa  
10501 aattgcaaaa gtaaatatgg tgtttctagt aaaattatag attggatata ttttctttt  
10561 tttgaaaatt tattactctt tccgccaatt gtaattttaa atatctata tctaggtaga  
10621 tatttttcaa aatatggatt atttgaaatg atattttatt tatcaatagc cattcttctt  
10681 agtagaaaat cagtcaatat tattttactt cttctttgca aatataaaag gctagaaaat  
10741 gacaaataaa ggattaatag aacatcttaa ggatgcaaaa gatagtctg tagattttta  
10801 tataggactt tatgattttg gagatttttt agctagaatt tcaggtttta aagattggca  
10861 agaaaaaagt gttgttttcg atgattttta taaaaacaa gcatttgaag aattgggctt  
10921 tttagaagat gttcttaaaa atgaaacttc tagaaatatt atactagaat atttaataaa

10981 agatgtcaat gaaagacctt tatattattht agcaccatca tcaatthttaa aaataattag  
11041 taaaacaact aaagcaaaaa caatacctac aataggctta atctccttat ctggaaaaagc  
11101 aacatccacc gctcactctc tctaccctca ctacaaaaac atacaaaatt cttttacccc  
11161 tttatgttct atagataata aaaatagtaa tttgttaaaa gaatttaatt ttgatagttt  
11221 ttcttgtaat ttttataata ataataattht caatcaaagt cttagcatt taaataatat  
11281 acaaaatgaa aaagaatata tcaatgagta taaaatatht ttagaaaatc ttaattattht  
11341 taatcaagaa tataataatt ataagcttgt atctatacaa gtaatcaata atthtaaaat  
11401 agcctatata caaaagctat ctttacaaga tattaataat attaataatca attcagaact  
11461 ttatttgcta aaagcttht atthttgtga agattatgtt ttatttgata aagataagca  
11521 agctthtatht aataaaaaa caataaaaga attagaattht gattctagtt tttatactat  
11581 cttgtctct cacaagcca aatthaacga tactthttha caagcaagaa aagaacttht  
11641 taaaagcata aatgaattht aaagacttgg cttthaaagat ttagaaaatg cttatcaaac  
11701 ttatatccat tctttgattg taaataaaga aataaatagt aaagataaaa caataataa  
11761 aatgaaaat aaagaaataa ataaaaattht aaatcaagat gaaaattcaa atcaagaaag  
11821 caataataaaa gaaaatgcaa gtaacacaaa aaaagaagat tthaatcttht tatcttctca  
11881 ttctaaaaac ctaaaccatt tcatcttga aaacaaagat aaaaaataaaa gaattatctt  
11941 tthaaataat gcttcatcga tgtcaaatht aatccatatt tatgataata atgtgatgt  
12001 gtttattaaa aatgattctt tgcttgatat taaaaaata gaaaaagaat atgatattaa  
12061 atthaaagaa tthaatacaa gggtattht ttacgaaaaa cttctthtag gtgcaaaaga  
12121 aaataatgaa tthtathtg aagaaaaaga agaaaattht ctttatcatt tthaatacga  
12181 taaagaggat ttaagttctt taaaagattht aagtataaaa tataatatht ataatgcaag  
12241 gattaagaat tattcttht tagaagaaag tthaaatatt aaattagaac ccaaagagct  
12301 taaaaaagaa attgcctaca acaatgcaag tthtaataaa ctttcaaaag aacctthaaa  
12361 tgaattctcg tccagtgcta aagaacctg ctttatcact ttatatctaa aagatgaaca  
12421 caataaacct attgctaatg ctaaaatcat cataaaagg tttcaacata atgaagcctt  
12481 aagagtagtt aatctaaaa gacgcagtga tgaaaaaggc aagataagat ttgataaaga  
12541 aaagtattht agtgattgtt atagcttht agthaaagct gatgaaagca aagcttatht  
12601 tcctactcct ttacaaaatg ctaaaagaat atthtaataat tatacccatc acaaagttgg  
12661 acttatactt aaatthaaag ctaaagatca tthtagttat gatggattta atgtctatca  
12721 ttacaaagga aatgaattht ttaattctta tatggcaaga agtggcactg ctaaggcaga  
12781 caatgaaaaa agaagtaaaa aacaaattgc acattatht taccaagatg aaaaagataa  
12841 aagcaaaagt ggaaaggctt atthttacta tgatgatgaa agcattcaag atagatttgg  
12901 cactttacct gaaggggagt atthttaaa aatcaatgaa atagctaaag atactaagcc  
12961 taactthttha aaagattatc ctttgaaat aggaaaaacc tggggaagat actgcgtaag  
13021 attatatact gataaagaat gctctaaaac tthtaagaa atagaaataa aagaagtaa  
13081 tgaaaaagaa aacaaaacaa gcaaaaaaga taaaaaagag caaagcataa taaaagataa  
13141 tctatatctt tatagcatca atgaaaagg agagtttggc agtagtggtta gcataggtat  
13201 agcacaagca cagttattag aggatttht caaacaggtt aaatthtatac gaagcgaaaa  
13261 ggaaaatata atctcactca aagtggctta ccctgaaaaa atagataata aaattatatt  
13321 ttagtagaaa gtttatgaa aaaacactaa tatttcatga aaattcccat attgatttht  
13381 acgcttcttht tgcaccaggg acttatatag aattgcaatt agaaaaagaa agcgataaaa  
13441 cgctaaattg gagttatgta gagtgcaata gtgagaaaaa aatgcgatat ttgttgata  
13501 ctgattgtca ttctattgag gctaaagatc tthaaattht agatagtttht aaaggtaata  
13561 tttgtggatt tcatthtacct ataagtagag ataatagaacc acaaaaagat ataaaagatt  
13621 ataaatatta tattatagtt tttgcttatg atgaaaaaaa ggctatacct agtttagaag  
13681 atthtcatat agttatagat atgagcttht gagcaggagt tggaaaagat gagagtgtag  
13741 aagaaagtaa gctaaggaat gattthtata gtgatataat tcaaacaaat tgtatthttha  
13801 gtgtthttht ggctgtagag tthtthaaag cttgccaaag tthaaaagaa gaaaaaatg  
13861 aatagataa ttatathttht ttcaaaaact atcccaact tgcaggaaaa attgcttata  
13921 tatactatag atthgatttht gctaatgaag aatthttht aagtgtagat gatggaaata  
13981 agtathttht agaaaggag aaatthtata aagttgctt agatgttht atthaaacc  
14041 ctatthtataa aatgggcttht gagaaaaaaa cttcaaaatc aagttgttga tataaacatt  
14101 gtaaaagatt tthtthaaagga ctttgctaaa agactaggga tagacgaaaa agttthtgcct  
14161 gtaattggat ataactctca acgaggggat tctggaacat atgactatac agtaataact

14221 ttagatttga atccaaaagc ttcttatgtt gattttattg ataccattat tcatgaattt  
14281 aggcattttt atattttattg cataaaaaat aatttctaaa atagtataga aaaattgctt  
14341 tatcttgata tggtagaatt ttatataccg tgggaatttt ataaaaattt caatagtatt  
14401 gataaaaaat gcttaattta tgataatgaa gatgaaacga agaagtgttt aaaaaatcgc  
14461 acatattatg gaagttggaa atttttaaat cccacattag atctcttgcc aagtccttta  
14521 tactatcttc agccaagtga gttagactct aggattatgg catattatth tagaaaggaa  
14581 attaaattat aatgactcca ccatctttac cagatgtaga aaaacatgaa gatttcttac  
14641 aaaccagaaa agaaccttat gctattttatt tagccataaa cacaaacata aaaagttata  
14701 ataataattg tcctagcgag aaatattttt ggaaatttga taatatgaat gaacttgata  
14761 aatggtataa cccaaaattt ggcatatacc ttggcaaaat tgtttttgat aaaaaagaca  
14821 acaaactcat cccaaaatat atagccgcta aatttgaaaa tttagaagaa gaagttaaaa  
14881 agataaaaaa tcctttatgg cttgctaata aaaatcctaa ttatattgaa cctaaatttt  
14941 atgatggtat gagtggagggt tattattttg aaagtcctaaa taatttagag tatcaatgca  
15001 aatagaaaaa agacactcaa gttttaagcc aagaacaaat ctttcttat gtgaaagaac  
15061 tttatagtaa aaacacaata ataataaaaa attatattga tgcaatcaat aaagactatg  
15121 gcataaaacc tttcgtatth agtgatgaaa tttatgatga attaggagaa gttggcattc  
15181 ttacaaaaga acaagctaat aattttaaag ataaaagtta tattaataaa gatccgatat  
15241 tgcttgctat gcttgattat ttagcaaaac aaaataaaaa agatgaagat tatttaatca  
15301 cttttgatga tgagtatttt tatacttatt tggtttggag tttaaaagat ttcttattag  
15361 agctttctta tggtttgttt caagatgaaa ccgagcttct ttttaatcct gcagcttata  
15421 tggatgacac aaaaatatat tatcaaaatt taaacgaaga aataaataag cgttatgaaa  
15481 aaatattgct taatatggga tttgaaggag aaaatggtta ttttaaagat tattatgatt  
15541 atggccttgg caataatggt atttttgaat ttagcatata tgattatttt gcttatgatg  
15601 aaataggagt acaaccaatt caacaaagtc catatgttcc acctaaaagc ctttttgata  
15661 gccctaattt tgtctattct gatggaaatt atcacggaga tgcaaagctt gtcccttctg  
15721 ctttaggaaa gtattatttt gagcttttat atcaaaaaga aatttacata gaacttttac  
15781 gcccttatta tccaagcata aaagatttgc cagaagggtg ggacaataaa atgctagaaa  
15841 aagctaattt aaaataaaat tatagatatg agcttttagag taggagttgg aagggatgag  
15901 agtgtaaaag aaagcaagct atgaaataat tttacaacg ctgtaaaaaa taattagacg  
15961 cctaaagaca ttatctaaac aaattgtatt tttagtgttt ttgaagctgt agagttttta  
16021 aaagcttgtc aaagttttta agaaaaaaat gaaacagata attatatttt ttcaaaacct  
16081 atcctcaatt tgcaggaaaa attgcttata tatactatag atttgattta atcaataagg  
16141 aatttttaac aagcgtatca gaaaaagata aaggaaatta tcttcaagtt agagatggca  
16201 aatatattag caccataatt aataaaattt tacctttaga aaatgtagtc ttttatagcc  
16261 aaaagcctag tggatcttta tcatttggag cttatgaaga aaataaggct agattaaatc  
16321 aatacatttt aaaagcttat tttaaagaat ttacaaaaac ggtttttcac gaatgtaggc  
16381 atttttatat agaaaaatat tataatcaca atatgaatgc tctaggcaga tatgtttttt  
16441 attctgaaaa agcttatatc aatgagaaaa ttatttttga taaattgagt agaatttgcg  
16501 atcctagtga gaattattta gtaggttgca atataggtgc tatacaagat acttatgaaa  
16561 ttcagcccaa tgaaagagat ccaagatatg tagaaaccct cataggtaga agtttataat  
16621 caaggaaaat aatgaaaact ataaaaatac cgcttaaaga ttatatctcc aatataagag  
16681 aagataaaac tatttacttg ggcttgcaaa gtgatatgag tataaaaagga cttgataaag  
16741 aattcttaaa aaagaatata atcttaagag aaatttcaaa tttgaaacaa gcatttattt  
16801 aggtaaaatt ataatcaaag aaaaaaatat cttttttaa gcttttaata ttgatgagaa  
16861 ttgctttgaa gggctttaaag aacttttctt caaaaataac ccctatacaa ttatagataa  
16921 tttagaatta aaaaaatatt tcttaaaact ttataaagat aatattgaat ttttaacttc  
16981 ttatattaat gaaattaatc aagttcatgg tattaaactt taccatgttt tacatttaat  
17041 gctttaaaat tctaagtctt ccataaagca tgagtttaat taacatagca ttcttaaaac  
17101 tgctataatc atcttttttg ctttttctt ctaaaacatt atttagcctt atagtttcat  
17161 tctcgctaag ataatttaac ttttcttctg ctttttcagt tttaaacctt attttttcat  
17221 atcaaagcta aaaaggaata agtcatcatt attatcactt ataaaaaagc tagttaatac  
17281 tctcaaataa gtaatttttg ttctttttga taattttatt ctatttttta aattattttc  
17341 caaataatta agaaaattaa tcaaaaaagt tgtttttata tcatttattt gcatttcatc  
17401 ctgataatct agtaaatatt ccgcaagctc taaaaataca cctataaaac aataaagtgt

17461 tctttaaata taatattatt tatataaata aaatttcata taatccacat acaacatcag  
17521 aaattgataa taaatattta tcttgattta tcttattgat gtttttaagt tttattccaa  
17581 caatttcata aaactttggg tttgttgat ttaatttatt ttcagtgtaa aaaatttata  
17641 ttttgcaatt agtccttcaa acaattttat aaatgtaaaa tctatatttt caagttcttt  
17701 gctatacaaa taattattta taacttcttt taattcaact tacaaaacca aagctagaat  
17761 atgattttat tttagtggat gaagcacagg atatcaacgc ttgtgttattc gacattgttc  
17821 ttaatcaaaa acaagctaaa aaagttttta taggagatac ctttcagagt atttataaat  
17881 ttagaggagc ggtaaattct ttagaaatat tagcatctat gccaaaatct cacactttat  
17941 acctaacaca aagttttagg tgtccgcaa atatagcttt tattgccaac tcttatttga  
18001 aaattttaaa tgctccgcaa gatttcaaag gaacaaaaaa atcaagtaat gaaaatgtca  
18061 aaaacgaagc aaaagccata gtgtgtagaa ctaatgctaa gttattttgat atagccgtag  
18121 agaattttaga taaaaaatta tttttttagg gagggataaa tagttatagt tttgatgagt  
18181 tattagacat acaaaatctt ctttttaaaa aacacgaata tatcaaaaac caatttatag  
18241 taaagtttac tgattttaaag gagcttcttg aatatattaa tgaacccaaa gaagttgatt  
18301 taaaacgaaa aatctttggt cttttcaaat atgcgcatgg cgatattata aagcttatta  
18361 aagccattga aaaaagtagc gtaaaaaaac aagagcaagc tgatttattc ttaagcacag  
18421 gacataagag caaaggcttg gaatggaaca atgttgaaat tattgatgat tttttaaaca  
18481 tcaagcaaga acttgaagaa agagatcaaa tcaccatagc aaaagaagaa ttaaaccttt  
18541 tatatgtggc aatcacaaga gccaaaaatt ctctaagtat tagcaaagat tacttgcttg  
18601 aaaaagaatt tatacaagaa aatttagaaa ggataataat agaataaaaa taattaaaaa  
18661 attacaaaaa gatggaagcc ttaaaaagca agtttattat tctgttcattg aagttgcgca  
18721 aatgcaacta gtaacgcatg taacagttcg cctatggatt tcaagaggaa ttctaaaagg  
18781 cgtgaaatta ggcaaaggat tttatatgtc aaaagaagcc attattgaat ttcagaaaaa  
18841 tgatggttta tcataattaa ggagagagaa aaaatgagca gtatagcaaa agatagtcac  
18901 gttgaaatga gagatttttt atttaataaa tataacaaaa taacttttag cagcaaagaa  
18961 tgtgctaaaa ttcttgggat atctttgcaa actttagata gattgacaaa agataaaaaa  
19021 taaaatcaat gaatataact cgttttgtat tattctccat tgaagaaata gctaaaattc  
19081 tctcaggggc taagtcaaca aaatgaatag aaaagatagg gttgcgctag ctgcttatca  
19141 taaaacaaa aagctcgctt gctttgataa gtgagtaatt taaaagtata tgttaaagta  
19201 tatgtttttt agatatttaa tttttaaagt atggatattt agatatttga ttaataaatc  
19261 acaccccgac ctgagcacc attacttctt aaaatcataa aattccaaaa aaattttatt  
19321 gtttatattt gctcgaaaaa atacttccaa aatagctgaa atattttatt atagatatta  
19381 agaattttt tatataaata aaatagctt taaattatgt taaatattta attataaatt  
19441 atttaaaaac aataagctcg ctctcttaa ataagataaa aatagcccta tattcttaaa  
19501 taagactaaa aatgtatgat taaacttaaa ttaactaaa atttgatata gttcgcgca  
19561 tcaaaaaagt ttaataaaaa aattaaaaag tcatagttat ttaactgaa acatttgtgt  
19621 tatttttcat agaaaatcat aatacaata aagatctata taccgaataa ctaaaaaaa  
19681 aagggggggg gtatggaagc aaaaggaata gcgatatttc ctacaaatgt tgcatttagt  
19741 aaaaaaaca atgctttttt cactgaatta gaagatcaat tcttaaaaga aggggtcggg  
19801 acaaaaagt ccataaaact agattttgaa tattatattt tatattgtca atttttacaa  
19861 atagacaaag aatccctatt ttttgaaga aactatgaac ttgtgttttg ttttttactt  
19921 tattataggg ctttattaaa taaaacaat actcaaaaa tcgtagcaaa aataataaat  
19981 gttatacggt gccaaagatg attaccagag aaagtacact atagagaaaa aataatttgt  
20041 atggataatc aacacagaga tctttctcaa acactaagtt catgtattgc agaattttat  
20101 aattcaattg atctatacaa tacctttaga aaaaatatag gatttgaaaa tagaaagaaa  
20161 atagcgatag aaatgttaaa tcgcgcatca gaacactatg gtttttttgg ctttaagcagg  
20221 ggaggaataa catataagga agaaaaaatc tcttgcgtcc ctatacaagc attggatgag  
20281 tttcatcatg gtatgtcgca tctatgtgca gttttcttaa aagaagatgg acgatatacc  
20341 aatctagaaa gagcgatccc tcacttcaaa cgtggaatga tggaaagtata caaaacaata  
20401 atcagagatt ttatgatatt aaataaagat gctttaggag tcaacaaga agccttaaaa  
20461 ataagagaat tagaatatca aacatagga aaacccaaaa cagtaacaaa aaaccctacc  
20521 acaaacctaa ccaataaaaa agaagagaag gttatcccag gatataaaga actgtgcaaa  
20581 aaaattgtca gtcaaatcaa aaatgcaaag taaaatcggt atgaattgag cttgagtatg  
20641 caatttagct tatttgctat ttgcatactt agagccattc tttgaagaaa ttaaaaacaa

20701 tcctatcata aattaactat tataatgtaa aggcaaaaca aaataaaaat ttttaggcc  
20761 aatttcaaat ttttaattct ctttatgagc attaatgatt tctttagaaa gcgataggcc  
20821 caatccattt cccttaagtt tagtagtctt aaaagcttca aaaaccaaat tttcatcttt  
20881 gatttcacaa ccattatcat aaaccctaat gtataaattt tgttcatcac agcttgcttg  
20941 aattttgatt ttaggatttt cgcactcact ttcttcgatc gcatctatgg cattataaat  
21001 caaattttgc aaaaccaag ataaaagtgc cttatctcca taaattttca tatctaaaaa  
21061 attaatttca aatcaattt gagatgagta attgtaagaa tttatagcac tttcacactc  
21121 ttctgttaat tctaaaagat taaacttgct tgcattgata tgtacaccct tagtaaaaag  
21181 caaggtagaa tttacaatac gctctaccct agcaatagcc ttttgaattt caagcacaat  
21241 atgtttgttt ttaagctcac tacgagaaaa aagcgtggag gcaagtaagg atatagagcc  
21301 tataggattt cttatctcat gtgctaaatg cgccgcaaca cttccatac tagcaagtct  
21361 ttcattgcgt ttttcatcgc taatatccgt agctgaaact atggttttt cattatgagc  
21421 aataatttta accgcataaa atctattctc aaattcaagt tcatcacgat ttttttcaag  
21481 actgataata tcaagcaatt taggtttttt caaagcttct tgattttgca aaataatatt  
21541 tttttcttta tctaaaatcc aaagcgcact aggcaaaacc tcgataatct catctaccat  
21601 agcacgcaa gaattataat tttcgtttta aattttatat tcgttttcta caatataagt  
21661 ttgctctata aggctttgta agcctttttg tagggtttct ttttcacttg agtctagact  
21721 ttttaaaata ttttcattca tttattttcc tctaataaaa ttttaaaatc atttaaatcc  
21781 aataaaaagca aatcttgttt acaaatttta taaaattctt tactaaaacc attttttgaa  
21841 ataataat aattatttgg ctctagtttt aaagattttg cttttaattc taaaaggttt  
21901 aaaatatttc tacaattttt tttattttta aatttaactt cgccgataaa acttatcttg  
21961 tcatccttat aataaagatc aagttctaaa tttttatccc aataactttg caccctactc  
22021 acttgaaatt ttttttcaag taattctctg gaaagttgct caaaacaaaa actttgataa  
22081 agttcaaatt tctctttaat caaagttaaa acttcttcat agcgattttg caaaatcaac  
22141 ttttcattgg gtttagaaa ataaaaaaag aaacgagtaa attgattggc aaagataatt  
22201 ttatcttgta tcacataaga tcttaattct tttttaagtt tttgtcgttt atctcttacc  
22261 cttttcgcct ctttgctatg ctcaagtttt ataatccccg ctcttaaaag atattttaaa  
22321 gttgataaag ctttaaatg ctgaattttt ctattgatag aaaaacgctt acgattgttt  
22381 ttagctagca agctaagagc ataagaagcg gtctcatcga gcttgaaaca atccttgata  
22441 tctaaatagt ttttgagcaa aagatattct atattgtgaa atacatcttc ttcaaaat  
22501 aaactatcca agctctcaaa accctcaaaa acactataaa aatcaaaaat tttagccaaa  
22561 gctgaagtgt tgcaaatttt tgcaaaatga ttaaaattta ttttttctc ttttaaaagt  
22621 atttttatag tataatttta gcaaattttt aaaggattgt gcttgcaaat ttcagattta  
22681 aaaaaagaaa taattttaaa aaaaggcacc ttgcattttg actttaccgc tagtgctttg  
22741 gcattaaaat gcgtagaaaa agaaattgca aaaatactgc caagttatgc aaatactcat  
22801 tctgacagct ctttaaacct ttttaaaact caacaaattt acgaacaagc acgcaagat  
22861 atcaaaaca gtcttaatct aagtgatgaa tttgcactta ttgcttggtg atcaggctct  
22921 agcagtgcta ttaaaaaatt tcaagaatta cttggaattt atatccgcc acttgtcaaa  
22981 gaaaagtatt ttgaaaagat agataaaagc accctaccct tagttatcgt agggccttat  
23041 gaacatcatt ctaacgaact ttccttccgt gaaggtttgt gcgaatgtat aagaattccc  
23101 ctagataaaa aaggaaacat agactttgaa attttagaaa aagttttaaa agaaaatcaa  
23161 cacagaaaaa ttatcgctag tttttcccta gcttcaaag ttacaggtat attaagcgat  
23221 tataaacgca tttctaaatt agtgcgtaaa tttaaaggca tagtcgcttt tgatgcatca  
23281 agctttatcc cttataaaaa catagcttgc aagtattatg atgctttatt tataagttct  
23341 cataaattaa tcgggggcat aggaggttct ggtcttttag caatcaaaaa agaactttgc  
23401 ggaaacaac caagctttgc cgcaggagga actgtggatt atgtttcgcg cacctctcaa  
23461 tgttatcttt gcaatgaaga ggcttttagaa gaagggggga ctctggaat tttacaacta  
23521 attcgtgcga gcttgcttt taaaataaaa gatgaaatag gcatagaaga aatagaaaaa  
23581 aaagaagaaa ttttaaaaga atacttcttt gaaaaactaa aaactatacc tcatttaatc  
23641 ctatatgcta ataataaaa aactcgctta cctatctttg cttttaatat caaaaacatt  
23701 tctccttttg acttagccta tgagctaagt aaaaaatacc acatagaaac acgcgcgggc  
23761 tgtgcttgcg ctggcttcta tgggcatgat ttactaggct taaaagataa tgaagaatta  
23821 aaaactaac caggttggct aagaattagt ttacattata ctacgaaaa agaagatatt  
23881 gactatttct ttgaagcact gcaaaaaagt ataataaaat tgaattttta atgatggcgc

```

23941 agcggacggg gctcgaacc gcgacctccg ccgtgacagg gcggcattct aaccagctga
24001 actaccgctg cacccaagaa gtaataattht aatggtggtc actataagac tcgaacttat
24061 gacatccacc ttgtaagggt ggcgctctac caactgagct aagcgacctt aatthtttggc
24121 gacccttaga ggatttgaac ctctgtttcc acacagagag agtgttgtcc tgggccacta
24181 gacgaaaggg tctaaacccg ataagtgggtg tcccgtgttg gattcgaacc aacggccccc
24241 tcctaaaag ggagatgctc taccggctga gctaacgaga cagatggcgc agcggacggg
24301 gctcgaacc gcgacctccg ccgtgacagg gcggcattct aaccagctga actaccgctg
24361 cacccaagaa gtaataattht aatggtggtc actataagac tcgaactta

```

//

LOCUS NLMJPNJI\_2 7512 bp DNA linear 12-APR-2021

DEFINITION Campylobacter species strain strain.

ACCESSION

VERSION

KEYWORDS .

SOURCE Campylobacter species

ORGANISM Campylobacter species  
Unclassified.

COMMENT Annotated using prokka 1.14.6 from  
<https://github.com/tseemann/prokka>.

FEATURES

```

Location/Qualifiers
source      1..7512
            /organism="Campylobacter species"
            /mol_type="genomic DNA"
            /strain="strain"
gene        complement(400..1680)
            /gene="trxB_1"
            /locus_tag="NLMJPNJI_00036"
CDS         complement(400..1680)
            /gene="trxB_1"
            /locus_tag="NLMJPNJI_00036"
            /inference="ab initio prediction:Prodigal:002006"
            /inference="similar to AA sequence:RefSeq:CKG87041.1"
            /codon_start=1
            /transl_table=11
            /product="thioredoxin reductase"
            /protein_id="Prokka:NLMJPNJI_00036"
            /translation="MSDTYMIYAPNGLGVEVDKKTKEIYFAQSVDPVGKYTKYTRVF
            FKAW EIKQNSPYKDYKPIYLDPNFYTGQASTLLEFKDWQSIYLDKPIKGAIAPWTKAE
            KAYYKSLKTKRERYKYLIIRSGLRVVIDIPYEAYCNVDEKGNLINKDYKELYKEVEA
            NRGMANMHKGWLFMAEWELAAGILGDIKGFVQALQLSMTGFKARTQAINFLLIQLGHE
            QGFKSLYDSYAYRDLTDGIHKNPLKAQMLKDFSKNPPYDELGMLPFLDELIGVDWVID
            PNDYYFVYDGAKGRVNDALKDDVEKGILKDPRIIDSTSESRLF EYKLDAYRNGMKTR
            FDGDNPNHWSKEQVERFNDTLILCAKLAALTPPQGYTNAPYYYSERLEFIYKNHNL
            KLLDPRIPAIYRYNFPRELRAKILKFGEENGIKE"
gene        complement(1701..5414)
            /locus_tag="NLMJPNJI_00037"
CDS         complement(1701..5414)
            /locus_tag="NLMJPNJI_00037"
            /inference="ab initio prediction:Prodigal:002006"
            /codon_start=1
            /transl_table=11
            /product="hypothetical protein"
            /protein_id="Prokka:NLMJPNJI_00037"
            /translation="MKNKEFTCQYIYNQNELKNLIDKYCKQAKNIVLYCNNFSRKNVL

```

NLAISDYEIAKDCYSLDKYLYNTLKISAYKGGKVQIYDYSYKQFTDSNKTDNSSNF  
ITTSLSCDMASIFDDFIKALEKSEDETTSEAMTQISKKENKIDFLITCINEKLTPTI  
LQKLKSFDEYQKLNEYKLNQIELIFGELIQNIKDIYAEGYEFAYKTIINAFLNIVNI  
FKLKSFLTKTHPLLIASDIAFESWRVFDISEWSENKYSYVFYNAI IKLLISDIGYIF  
TVFENKIHHYTLIIDDKILDFDSGFGAVNFQSSVYHKQDLAICLKSNEEIFKDFWSAN  
SSNFFTENPKEEFILYKQYSIKEALKRQIPLDQNRLSYIESPYFNSIALAQUIIKDLKD  
KKSESYHAKNFLIITNAPQKYNAGLHQKLTTEEIFENTIIYPTIKDEKQNDILVKAPK  
DYDVMIDYSKYKINIIDNETNAFVLSLSPFVKLNYQTYQSFEDVVKEKEKLLNSITDD  
NPENVFQYLNFIKNPSNADKIHNYHYLQSVFYQANNKKTFLKQKQYFQEGIDCLRAY  
INSIIQTKQQNIGTYTGVTYSEKFDVKKNITITEVLLLALSYYVIKHFYSSIKTDYQA  
WWKLFNTYESIQIEEEESVDMLPKDVF LNINEEKIPLCFSKQQKAKLAKKEIFCIEEF  
VDYLEQLKDYEISDEDDRQFLFSLEEPQDENNQIQDTAVECNLQNLALIENEKSNR  
KIDDELDELIKDIEKNNINKTPYNPQKTIVAMMDAFIDKFFPFADFLRGDDFKFAKQL  
SKTVLNFLTLEAQKALYENIGASYLLFLMTKSNIHMKKVTIHNQKEDFRKFKL SKMA  
LLELCYMQKNKNKHEAIMLV DGMTFKELKNRKGFKDLTNISKKQIFRYKFNFTLKTIR  
NIAKESFISLPQVIITDLVNQLWITHYEKSKKEYERLKFFNFSDKYNPPYVLMKKPTN  
TQEGFISYPMFINNTFISFNFTSMFTGGKLTGGGLGEEKESLFVYHKDLSGTTKVRNYL  
LNKLFAYLCLDELRSKTGDLKIIDIDFFNAYSYLHDLPIKPRLLK LKHEEDFLISNH  
LSKTQKENIQYNQKLQAINEDDIKKALYKEYKNREAKGLAAIDAYHKCMDYLEMDN  
DIFNTKATNNASDPSKHREFLRALDTIGQNNIKALYVINGDKNISQKKESEENKEYM  
IKVVNNKEEKEKCPKFGVRLATTIIMKNGLHIG"

gene

complement(5476..6063)

/locus\_tag="NLMJPNJI\_00038"

CDS

complement(5476..6063)

/locus\_tag="NLMJPNJI\_00038"

/inference="ab initio prediction:Prodigal:002006"

/codon\_start=1

/transl\_table=11

/product="hypothetical protein"

/protein\_id="Prokka:NLMJPNJI\_00038"

/translation="MKFKVLETINAELFPQWDVLLDLHINSFLDIFSTHKQVNKNDIT  
EII EYSFLCDFLECSDYAEFFMIFNLYTKDYQGEFVKVFTKFLHDLIDFYINDEKQN  
TLSAYTKDKDNWKYFLDNYINKECFYIDDFCIASWDIPSSWNKYININAIITPKGTYK  
FNEILAPKFYNKYKDLEVEIDDKGNVLRWIGEINR"

gene

complement(6063..6542)

/locus\_tag="NLMJPNJI\_00039"

CDS

complement(6063..6542)

/locus\_tag="NLMJPNJI\_00039"

/inference="ab initio prediction:Prodigal:002006"

/codon\_start=1

/transl\_table=11

/product="hypothetical protein"

/protein\_id="Prokka:NLMJPNJI\_00039"

/translation="MEEWRNKSSRVIKPLFTPLEGIVGDISNSLENSIIGDALAMLG  
AVKNPKNAKNIKKKSLTKDEILNEIKLKKSHNRIYLVDDINELMVLWDKLTKNYQK  
EIVETNSKRIRIIRILEDDTRLMLRNYSSNKSNDNMPTIDTKINNKYKIHNINLGP"

gene

complement(6621..7508)

/locus\_tag="NLMJPNJI\_00040"

CDS

complement(6621..7508)

/locus\_tag="NLMJPNJI\_00040"

/inference="ab initio prediction:Prodigal:002006"

/inference="similar to AA sequence:RefSeq:CKG86671.1"

/codon\_start=1

/transl\_table=11



```
/product="methyltransferase small"  
/protein_id="Prokka:MLMJPNI_00040"  
/translation="MLESDLLSSIVACPNTIANVSYPTKVVDIKGSLSQKKVNGEF  
VILQELISACTTDKGFALKVSFTPSKFKFDHSFDPKEGLGEQSKNQIELKEARLRMY  
KEHKYQKDNLLITNLYLNDTLYQNEQGLDKLELSKNDLNLNDINVLNTLKQDFSKDY  
EFKECKIKLGVHLLKLIPIPKNIAKIYKSAYKEFENKDLGAGYFTQLHEYDKDYREN  
ENIIHHRVFLTPSKMQKIDFEIAKGLDEWLDNENVCCFNVYTKDYFNANDKMLISDN  
IKDDTNTTQAHTNENYNTT"
```

ORIGIN

```
1 taataagcct tttctgcttt agtccaagga gctatagctc cttttatagg atcttttaaa  
61 tatatgcttt gccaatcttt aaattcaagt aaagtagaag cttgtcctgt ataaaagtta  
121 ggatctaaat atattggttt atagtctttg tagggggagt tttcttctat ttcaacagcc  
181 ttgagcaaaa cttcagcatg ctttttggtta tatctacctc ctttttttgt tcctttataa  
241 agaataacct catttgtttc ttgattaaat tttgctcctt ttccattagg ggcataatata  
301 taagtttcac tcatcttttg tccttttatc ttttaattat cctatatgta aaccattttt  
361 catgattata gtggtagcta gtctgcctat gaggttactt tattctttta tgccattttc  
421 ttcaccaaat ttgagtatct tagctctaag ttcccttggg aaattatata tataaatagc  
481 agggattctt ggatcaagga gtttatctaa attatgattt ttgtaaataa actctaactt  
541 ttcaggagag taataataag gtgcattagt atagccttga ggaggagtga gggctgagag  
601 tttggcacat aaaatcaaag tatcattaaa tctttctact tgctctttac tccaatgatt  
661 tggattatct ccatcaaatac tagttttcat tccatttcta taagcatcca atttatattc  
721 aaattccaat ctactctctg aagtagaatc tatactctct ggatctttga gtattccttt  
781 ttcaacatca tcttttaggg catcattaac tcttcctttt gctccatcat aaacaaaata  
841 ataactcatt ggatctatca ccaatccac tcctataagt tcatctagaa aaggtagcat  
901 acccaattca tcataaggag gattttttaga aaagtctttt agcatttgag ctttaagagg  
961 gtttttgtgt atgccatctg ttaaactctt atatgcataa gaatcataaa gacttttaaa  
1021 gccttgttca tgccttagtt gtatgagtaa aaaatttatt gcttgagttc ttgctttaaa  
1081 tcctgtcatg gaaagtgtga aggctcctac aaatcctttt atatctccta aaattcctgc  
1141 tgctaattcc cattcagcca taaagagcca acctttatgc atattagcca tacctctatt  
1201 ggcttctact tctttataga gttctttata gtctttattg attaaatttc ctttttcatc  
1261 tacattacaa tatgcttcat aaggatatac tataaccaca gatcttaatc cacttcttat  
1321 aattaaatat ttatatcttt ctcttttagt ttttaaagat ttataataag ctttttctgc  
1381 ttttagtcaa ggagctatag ctctttttat aggatctttt aaatatatgc tttgccaatc  
1441 tttaaattca agtaaagtag aagcttgtcc tgtataaaag ttaggatcta gatataattg  
1501 tttatagtct ttgtaggggg agttttgttt aatttcccaa gccttaaaaa aaactctagt  
1561 atattcttta gtatatttac ctacaggatc aacgctttgt gcaaaatata tttcttttgt  
1621 ttttttatct acctctactc ctaatccatt aggagcatat atcatataag taccactcat  
1681 cttttatcct ttctttaaat ttatcctata tgtaagccat ttttcatgat tatagtgggtg  
1741 gctagtctgc ctacaaattht agggcatttt tctttttcct ctttattgtt gacaacctta  
1801 atcatatatt ctttgttttc ctacttttct tttttttgtg agatattttt atcaccattt  
1861 atccccacat acaaagcttt aatattattt tgccctatag tgtctaaggc tcttaagaat  
1921 tctctgtgtt ttgagggatc agaagcggtta tttgtcgctt tagtattaaa aatataatta  
1981 tccatatctt ctaaataatc catgcattta tgataagcat ctatggctgc taaacctttt  
2041 gcttctctat ttttatactc tttatataaa gcttttttta tatcatcttc attaatagct  
2101 tgtaattttt gattgtattht ttgtatgttt tctttttggg ttttagaaag atgattagag  
2161 attaaaaaat cttcttcatg ttttagtttt aaaagtcttg gttttatagg taaatcatgt  
2221 aaataagaat aagcattaaa aaagtctata tcttctatga tttttaaatc accggttttt  
2281 gatcttaact catctaaaca caaatatgca aaaagtttgt ttaaaagata atttctcacc  
2341 ttttttgtgc cgcttagatc tttatgatag acaataatg attctttttc tcctaaacct  
2401 cctgtttgta gttttccacc tgtaaacata gaagtgaat taaaagaat aaaagtattg  
2461 ttgataaaca taggataaga gataaatcct tcttgtgtat ttgtgggttt tttcattaac  
2521 acatagggag gattgtattht atcactaaaa ttgaaaaatt tcaatctttc gtattctttt  
2581 ttgctttttt catagtgggt tatccataat tgattaacta aatctgtgat gatgacttga  
2641 ggcaaggata tgaaagattc tttggcaata ttgcgaatgg tttttaaagt aaaattaaat
```

2701 ttatatctga aaatgtgtt tttactaata tttgtcaagt ctttaaaacc tttgcgattt  
2761 ttttaattcct taaaagtcac accatctact aacatgatag cttcgtgttt gtttttattt  
2821 ttttgcataat agcaaagctc taatagggcc attttgctta gctttttaaa tcttttgtca  
2881 aattcctttt gggtgtgtat tgtaactttt ttcataatgaa tttttgattt agtcatcaaa  
2941 aacaacaaat aactcgcacc tatattttca taaagggctt tttgtgcttc aagggttaaa  
3001 aaattaagga cagttttgct aagttgcttg gcaaatttaa aatcatctcc tcttaaaaaa  
3061 tccgcaaaaag gaaagaattt gtctataaaa gcatccatca tagctactat agttttttgt  
3121 ggattataag gcgttttatt tatattgttt ttttctatat cttttatcaa ttcatacaagc  
3181 tcatcatcga ttttcctggt tgattttttc tcattttcaa tcaaagcatt taattgcttt  
3241 agattacact ccactgctgt atcttggtt tgattatttt catcttgagg ctcttctaga  
3301 gaaaataaaa actgcctatc atcctcatca ctaatttcat aatcttttaa ctgctctaaa  
3361 taatccacaa attccttctat acagaaaatt tctttttttg cgagtttggc tttttgttgt  
3421 tttgaaaagc ataggggaat tttttcctca tttatattta aaaagacatc ttttaggaagc  
3481 atatcaacac tttcttcctc ttctatttgt ataccttcat aatttgtaaa caatttccac  
3541 caagcttgat aatcggtttt aatagacgaa taaaaatgct ttattacata ataacttaag  
3601 gcaagtaaaa gaacttctgt gatggtaata tttttcttat cgacaaattt ttccgaataa  
3661 gttacacctg tgtaagtacc aatgttttgt tgtttgggtt gaataatgct atttatataa  
3721 gctcttaagc aatcaatgcc ttcttgaaag tattgttttt gtttttctaa aaaagttttt  
3781 ttattatttg cttgataaaa aacagattgt aaataatgat aattgtgtat tttatcagca  
3841 ttactaggat tttttataaa atttagatat tgaatacat tttcaggatt gtcactgtg  
3901 atactattta ataacttttc tttttctttt accacatcct caaagctttg ataagtttga  
3961 taatttaatt taacaaaagg acttaaaagaa agcacaaaag cattagtttc attatcgata  
4021 atatttattt tatatttact ataactatc attacatcat agtcttttgg agctttgact  
4081 aaaatatcat tttgtttttc atcttttatg gtatctggat aaatgatggt attttcaaaa  
4141 atttcttctg taagtttttg atgaagtcca gcattatatt tttgcgagc attagtgatg  
4201 atgagaaaat tttttgcatg gtaagattcg ctttttttat cttttaaadc ttttatgatt  
4261 tgagctagcg caatagagtt aaaatacggg ctttctatat aacttagtct attttgatct  
4321 aaaggtattt gccttttaag tgcctcttta atggagtatt gtttataaag aataaattct  
4381 tctttgggat tttcagtgaa aaaatttgaa gaatttgcac tccaaaaatc tttaaaaatt  
4441 tcttcatttg atttaagaca tattgctaaa tcttgtttat gatatactga tgattgaaaa  
4501 tttaccgctc caaagcctga aaaatcaaaa agaattttat catctataat caaagtatag  
4561 tgatgaattt tgttttcaaa aacagtaaaa atatagccaa tacccttat aagtagtttt  
4621 ataatagcat tataaaagac ataagagtat ttattctcac tccactctga aatatcttga  
4681 aaaaccctcc atgattcaaa agcaatatca ctagcaatta ataatggatg cgtttttgtc  
4741 aaaaagcttt ttagtttaaa gatattaaca atattaagaa aagcattaat tattgttttg  
4801 tatgcaaaact cataaccttc tgcgtaaaata tctttaatat tttgtatcaa ttcaccaaat  
4861 atcagttcta tttgttcatt tagtttataat tctgttaatt tttgatattc atcaaatgat  
4921 ttttagtttt gaagtatagg agtttttaat ttctcattaa tacaagtaat taaaaaatca  
4981 attcctttgt tttctttttt tgaatttgc gtcatagctt ctgaagtagt ttcactctg  
5041 gatttttcta aggcttttat aaaatcatca aaaatgcttg ccatatcaca agataaagaa  
5101 gttgtgataa agtttgagga attattatca gttttattag aatcagtaaa ttgtttataa  
5161 gaataatcat aaatttgaac ttttttacct ttataggcag atattttaag agtgttatat  
5221 aagtatttat ctaaactata ataacagtcc ttggcaattt cgtaacttga tattgctaga  
5281 ttaagtacat tttttcttga aaaattatta caataaaaa ctatattttt agcttgtttg  
5341 caatatttgt ctatcaagtt ttttaagctc ttttggttat aaatatattg acaagtaaat  
5401 tctttatttt tcattattta ctttaagta aatattgtct tagtattttt ttatttaaat  
5461 aaaatttaag caaatcatc tattaatctc tccaatccac ctaagcacat tacccttatc  
5521 atcaatctct acttctaaat ctttgtattt attataaaa ttaggagcta agatttcatt  
5581 aaaatatttt gtgcctttgg gggttaaat tgcattaata ttatatttat tccaactact  
5641 tggaaatcc caagaagcaa tacaaaaatc atctatataa aaacactctt tattgatata  
5701 attatctaaa aaatatttcc aatttttatc tttatcttta gtataagctg ataatgtatt  
5761 ttgtttttca tctgttttat aaaaatcaat taaatcatgt agaaataatt ttgtaaatca  
5821 ttttacaat tcacctgat aatcttttgt ataaaggtta aaaatcataa aaaattctgc  
5881 ataactacta cattctaaga aatcgcataa aaaactatac tctataatct ctgttatatc

```

5941 atttttatctt acttgtttat gtgtggaaaa tatatcaaga aatgaattta tatgcaaadc
6001 aagcaagaca tcccattgtg gaaataattc tgcatttata gtttctaaaa ctttaaattt
6061 cattaagggtt ttcctagggtt attaatatgt attttataat ctttattatt aattttagta
6121 tctatcgtgg gcatattgtc acttttggtg cttgaataat ttctcaacat taatcttgtg
6181 tcatcttcta aaattcttat aattctaatt cttttactat ttgtttccac tatttctttt
6241 tgataatttt ttgttaactt gtcccataaa accatcaatt catttatatc atctactaaa
6301 taaattctat tgtgagattt ttttaatttt ttaatttcat ttaaaatttc atcctttgtc
6361 aatgattttt tcttaataat attttttgca tttttaggat ttttctactgc accaagcatt
6421 gctaaggcat caccgataat gctgacattt tcaagtgaat ttgaaatata tcccactata
6481 ccttctaata gggtaaataa aggctttatg actctgcttg atttatttct ccattcctcc
6541 aatcatcaa atattatctc aataaactct ccactacat cttgtgtttg tattcttata
6601 acattatcag ggataatctt ttaagtattg ttatagtttt cattgggtgtg agcttgtgta
6661 gtatttgtat catcttttat attatcactt ataagcatat ctttatcatt tgcgttaaaa
6721 taatccttag tataaacatt aaagcaacac acattttcat tatcaagcca ctcactaaa
6781 ccttttgcaa tttcaaaatc aatcttttgc attttagaag gagttaaaaa aactctatgg
6841 tggatgatat tttcattttc cctataatct ttatcatatt catgtagctg tgtaaaatac
6901 cctgctccta gatctttggt ttcaaattct ttataagcac ttttataaat cttggcaatg
6961 tttttgggga taataaagat taattttagc aaatgcacac caagtttaat tttgactctt
7021 ttaaattcat aatctttact aaagtcttgt ttaagagtat ttagtacatt aatatcattt
7081 aaattgaata aatcattttt agataattct aatttatcta aacctgttgc gttttgatat
7141 agggatcgt ttagatataa attagtattt aaaagattgt ctttttgata tttgtgttct
7201 ttataataca ttcttaatct agcttctttt aactctattt gatttttact ttgttctcct
7261 aagccctcct taggatcaaa gctgtgatca aatttaaact tacttggagt aaagcttact
7321 tttaaagcaa agcctttatc tgtagtgcaa gctgatatga gttcttgtaa gattacaaat
7381 tctccattta ctttcttttg agataaggag cttttaatat ccactacctt agtacaagga
7441 taacttacat ttgctatggt attaggacaa gctactatac tagagtttaa taaatcattt
7501 tctagcatta ta

```

//

LOCUS NLMJPNJI\_3 7385 bp DNA linear 12-APR-2021

DEFINITION Campylobacter species strain strain.

ACCESSION

VERSION

KEYWORDS .

SOURCE Campylobacter species

ORGANISM Campylobacter species  
Unclassified.

COMMENT Annotated using prokka 1.14.6 from  
<https://github.com/tseemann/prokka>.

FEATURES Location/Qualifiers

source

1..7385

/organism="Campylobacter species"

/mol\_type="genomic DNA"

/strain="strain"

gene

629..892

/locus\_tag="NLMJPNJI\_00041"

CDS

629..892

/locus\_tag="NLMJPNJI\_00041"

/inference="ab initio prediction:Prodigal:002006"

/codon\_start=1

/transl\_table=11

/product="hypothetical protein"

/protein\_id="Prokka:NLMJPNJI\_00041"

/translation="MSKIKTLRISDDKKHFSYWFKEKWIGDRISDFVIWFKNENATKD  
NIKKVSVYVWWRDLRPLPAGNEGAGFYLSGDRENCAYFKKEIK"

gene 889..1008  
 /locus\_tag="NLMJPNJI\_00042"  
 CDS 889..1008  
 /locus\_tag="NLMJPNJI\_00042"  
 /inference="ab initio prediction:Prodigal:002006"  
 /inference="similar to AA sequence:RefSeq:CKG86955.1"  
 /codon\_start=1  
 /transl\_table=11  
 /product="methyltransferase small"  
 /protein\_id="Prokka:NLMJPNJI\_00042"  
 /translation="MNNKEQIKKLLDNAELAMASYGYFHLADKSYNHNDKYEK"  
 gene 1366..2307  
 /locus\_tag="NLMJPNJI\_00043"  
 CDS 1366..2307  
 /locus\_tag="NLMJPNJI\_00043"  
 /inference="ab initio prediction:Prodigal:002006"  
 /codon\_start=1  
 /transl\_table=11  
 /product="hypothetical protein"  
 /protein\_id="Prokka:NLMJPNJI\_00043"  
 /translation="MSSFKDLLVADASLAIGSIPKAQYDDMINFYETCIKDYPQIKEK  
 DSLTITGHSLGGCLAQLFALSICDDKNRNNIKALYTYNAPGARKIIPPYDYIVKLFIF  
 HSKEQQERFIKEEENIACPHITIANVSYPTKVVDIKGSLSQKVNNEFVILQELISA  
 CTTDKGFALKVSFTPSKFKFDHSDPEEGLGEQSKNQTELKEPIIRLHYKSDRFQKDN  
 LPIYNLLINNEKKEQDKALNEFNIEQKDLKDIEDINIFNQFKQDFSKDHEFKELNLSF  
 DTNLIKLYFIIPKNIKVKYKSAYKEFKNKDLGAGYFT"  
 gene 2398..2514  
 /locus\_tag="NLMJPNJI\_00044"  
 CDS 2398..2514  
 /locus\_tag="NLMJPNJI\_00044"  
 /inference="ab initio prediction:Prodigal:002006"  
 /inference="similar to AA sequence:RefSeq:CKG86393.1"  
 /codon\_start=1  
 /transl\_table=11  
 /product="methyltransferase small"  
 /protein\_id="Prokka:NLMJPNJI\_00044"  
 /translation="MQNLKLQIAQGLDKILEDEDRKQELYVCKFVVVNGVKV"  
 gene 2511..5918  
 /locus\_tag="NLMJPNJI\_00045"  
 CDS 2511..5918  
 /locus\_tag="NLMJPNJI\_00045"  
 /inference="ab initio prediction:Prodigal:002006"  
 /codon\_start=1  
 /transl\_table=11  
 /product="hypothetical protein"  
 /protein\_id="Prokka:NLMJPNJI\_00045"  
 /translation="MKIKNFTLITSNHNLEIELKNLTKNANKIIFICSDFDGYKEAEN  
 SLYKTLHTIEDNFKIDNTKTFKIIHLNQTNKDEITKEQKFSDDKNLSSIKKIIYNLKL  
 LLNDTINQENKTLNKIIDESNEKNIENFLKEIQKELNILLKNIKESNYFDQEIKPKI  
 QVTLDTLFTLLKNIAQSNDDEYKQIIRAVAKFFINILDSITSLLKPKISLIKKNPYVL  
 IVNTLFEAYNSYSEYQEYKEKKYYYDFAYPLLELITSKLYPIIALCNEEILSDVLIID  
 DKVLLDFSSYTNAPSISLYKNSFYKIIILDEEFQGVFDNLFENLKFENEKLDNTLLVN  
 SSLNNSDRTLKKAJNLNISKLNHFFYAEPDLNSSLMLVEMILDKKNADQINTTKMGKN  
 YLFITNPPQLNAGLCELDYQKKLGAIIKRNPKALTKNEKLALKGDFPSKRDYGSYFI

ERDVKKEDDFVLQLCPFAKLDGQIYQKYKGYFNFYNQTYSWMKLYLLEYINERFEYEK  
FKQDFAYIDNFFKLPKELEKISEKEKEKVEEYVELFNDYLDKMNKSLAPYSVQNLVEY  
SVLHLFLATCALYVFQKEFEKHKYEIYADRGLYYYQALNKLKVIFSKSYTMFDDKKRY  
IFINKKLDIQADEKNRINEVIYLDELAKAMFENDLEEDDQTYVKFLNTLNENFDDEIE  
FEENIQTNQTLPTKKDLKSIQEIMLDNELAKLSLDITFFNIQKQFPFTEFFMSQPD  
FFKKMILFFIDSSLDKKYGNKLFSSFAHFFKELGIFYALNPKGRFIKIIPKSKKPF  
NKFLYQIGTNYYYFSQSEYASELKSKSFSRLDKAKQIHLISKARKQLAIDFSIKVS  
KNLSADVLKNLAGSFIDTLLPTNYERLKILYEKLMYEKLTNYDFPLAVKKEEYITYP  
LLINSRMSFDLSEFIFGSLCTGGLNYPSIACITTSSEAREFALKRLLSYIILDEK  
RSAFMEDKINEGKYILNDKEFFEKNNIELRNCNIYKLEHFQRKEEYKTQNPMIKQHP  
LAYNDTIQILYEYINGIYNTIQDEKGNFIEDRQKARRLMENLEAIGQHNLEVMYKGMG  
DKKIKDERKNENDDDESDDINKIQDYSNKFIGRLATTIIMEDGLYMG"

gene

5937..7223  
/gene="trxB\_2"  
/locus\_tag="NLMJPNJI\_00046"

CDS

5937..7223  
/gene="trxB\_2"  
/locus\_tag="NLMJPNJI\_00046"  
/inference="ab initio prediction:Prodigal:002006"  
/inference="similar to AA sequence:RefSeq:CKG86288.1"  
/codon\_start=1  
/transl\_table=11  
/product="thioredoxin reductase"  
/protein\_id="Prokka:NLMJPNJI\_00046"  
/translation="MSETYEIYMPNGVILEVEKETNKILLSGGAKVGKYTQEYSKAL  
FEAHNIKQNSPYKDYQPRYLDPEFHTGQKSTLLEFKDWQSIYKDPKIGSIAPWTKAE  
KAYYNSLKTCKERYKYLVIKRSVIRSVVIDIPYEAIGAVDEKGNVDPKYEELYRTVDDN  
KHNLRSSLFHNEWGMAAGILGDYKYLANDMSQNGFNARFIQATILYIQLSGSSILDK  
PNLLGAIYGYADIAGVSGLVGVHKNPLREQQIKTLAKTLKPDEFGMLPFIDEIMGVDW  
VIDLNKYRLANDEFDGIYKALRSDVVEGKIKDPRDIDSTYESRREFDRYRVGYRKGMR  
QGYETDTPNDWSEERAQLFNDTLILHAKLAALTPPQGYPNAPYYFTPENLEWYYKRHK  
LDKLLDPRIPAIYRYNFPRELRAKILAYAKEYNIKD"

ORIGIN

1 attacgttga taataaattt gatataaaag atgaagataa aattgttacc tttgaagatg  
61 ttttagatat tacctataaa aactctaaaa ttattgatga aagaggattt aaaatcggca  
121 ctctcaatgg cgacttctct ccactccaag ctaacaatt ctttctcgc tatgatttat  
181 taaaacattg tcctaataca aattcagggtt tttctgctac tttgtttgga gaaaaaagaa  
241 aataaattta tagtaaaata aaagaaaaag ttatactgct gaatataact tataaactat  
301 attttaattt taataaaata gagagtctaa ggagataacc catgacatac atattacttc  
361 ttattataat ttctactatt ctttcttatt ttatattaaa atttatttat aaaatcatct  
421 ttaaatctac aaaaagcgtt tcaaagtttt tagtctaggc ttaattatct tttattatac  
481 tccttattct tattatttag agccaagcct ttataagttt aaagaaatat gcaagctaga  
541 cccagagatt taccaagcca atggtagtaa attagatgag gagtattata ataaagtgct  
601 aaggtatttt gatacggatt tggataatat gtcaaagata aaaacattaa gaataagcga  
661 cgataaaaag cacttttcat attggtttga aaaatggatt ggagatagaa tctcttttga  
721 ttttgtcatt tggtttaaaa atgaaaacgc taaaaaagac aatatcaaga aagttagcgt  
781 ttatgtttgg tggcgtgatt tacgaccatt gccagcagggt aatgaggggg cgggattcta  
841 tctttcagga gatagggaaa attgtgctta ttttaaaaag gaaataaaat gaacaataaa  
901 gaacagatta aaaagctcaa agataatgcc gaattagcaa tggcaagtta tgggtatttt  
961 ctttagcag ataaatccta taatcataat gataaatatg aaaagtgatt aaaggaattt  
1021 agagaactta aagcaaaagc attaggaaaa gaaattgatg aaagtattta cccacctac  
1081 gcagatatac tcgacattac ctataaatac tatcttgatg ataattggcaa acccaaagat  
1141 ggcttatttg atgatgagtt atttagtggc gacttctctc cactccaagc taacaattc  
1201 ttttctcgct atgatttatt aaaacattgt cctaatacaa attcaggttt ttctgtact

1261 ttatttggag aaaaaagaaa acaaaagaat acagaatcta aagagattag ctatacaagt  
1321 gaatatggct atatcaatta tatttttagct attagaggaa cagaaatgag ttcttttaaa  
1381 gatttgcttg tagctgatgc ttcttttagcc ataggctcta tacccaaagc ccaatatgat  
1441 gatatgataa acttttatga aacttgtatt aaagattatc cacaaatcaa agaaaaagat  
1501 tctcttacta ttacaggaca ctctcttggga ggctgtcttg cgcaactctt tgctttgagt  
1561 atctgtgatg ataagaatag aaataatatc aaagctttat atacttataa tgcacctgga  
1621 gctagaaaga taatacctcc ttatgattat atagtcaaac tctttatatt tcacagtaaa  
1681 gaacaacaag aaagatttat aaaagaagaa atagaaaata tagcttgtcc tcacaccata  
1741 gcaaatgtaa gttatccttg tactaaggta gtggatatta aaggctcctt atctcaaaag  
1801 aaagtaaata atgaatttgt aatcttacia gaactcatat cagcttgcac tacagataaa  
1861 ggctttgctt taaaagtaag ctttactcca agtaagttta aatttgatca cagctttgat  
1921 cctgaggagg gcttaggaga acaaagtaaa aatcaaacag agttaaaga gcctataata  
1981 agacttcatt ataaaagtga tagatttcaa aaagataatt tgcctattta taatctttta  
2041 atcaataatg aaaaaaaga acaagacaag gctttaaatg aattcaatat agaacaaaa  
2101 gatttaaaag atatagagga tataaatatc tttaatcaat ttaaacaaga ctttagtaaa  
2161 gaccatgaat ttaaagaatt aaatcttagc ttcgatacta atttaaatcaa gctttatttc  
2221 attatcccca aaaacattgc caaagtttat aaaagtgctt ataaagaatt taaaaacaaa  
2281 gatctaggag cagggtattt tacatagcta catgaatag ataaaatcat taaaaattct  
2341 ttagaagata agaaagaatt aaacgaatat catttaactt ttttaactcc tgcaaaaatg  
2401 caaaatftaa aacttcaaat cgcacaaagga ttagataaaa tcttagaaga tgaagataga  
2461 aaacaagagc tttatgtttg taaatftgtg gtggtaaag gggftaaagt atgaaaataa  
2521 aaaatfttac tftaattaca tcaaatcata atfttagaat cgagftaaaa aatctftaca  
2581 aaaatgctaa taaaattatt tfttatatgca gtgattftga tggatataaa gaagctgaga  
2641 attctctgta taaaacatta catactattg aagataatft taaaattgac aatacaaaaa  
2701 cftfttaaat catacattta aatcaaacca ataaagacga aatcacaaaa gaacaaaaat  
2761 ttagctctga taaaattfta tcttagcatta aaaaaattat ctataataat tftaaactft  
2821 taaatgatac aatcaatcaa aatgaaaata aaacactcaa taaaattatt gatgaaagca  
2881 atgaaaaaaa tatcgaaaat tftfttaaaag aaattcaaaa agaattaaat atattactaa  
2941 aaaatatcaa agaatctaat tattfttgatc aagaaatcaa gccaaagata caagftactft  
3001 tagatacgct tftftaacaca cftftftaaaa atattgccc aatctaatgat gatgaatata  
3061 agcaattat tagagctgta gcgaaatftt tftatcaatat attagattct ataaccagcc  
3121 tftaaaaagc catttctfta attftaaaaa atcctftatgt tftgattgta aatacattat  
3181 tftgaagctta taattctftac tctgaatatc aagagtataa ggaaaaaaa tattattatg  
3241 atfttgctta tccactftta gaactftatca cttagcaact tftatctatt attgctftat  
3301 gcaatgaaga gattfttatct gatgtgtfta tftatagatga taaagtatta ttagattftt  
3361 catctftaac taatgacct tctatcagtc tftftaaaaa tagftftftat aaaattattft  
3421 tagatgaaga atftcaaggt gftftftgata atftftftaga aaataatcta aaattftgaaa  
3481 atgaaaaatt agacaacact cftftftagtga atftctagftt aaataattct gacacaacat  
3541 taaaaaagc gataaattfta aatatctcca aactcaatca tftctftftat gcagaatacc  
3601 ctgattftaa tftctftcatg cttagtagaaa tgatactgga tftaaaaaat gctgatcaaa  
3661 tcaatacaac caaatgggt aaaaattatt tattftttac caatccacca cagctftaata  
3721 atgcaaggct tftgcaagat tftgtatcaaa aaaaattagg agcaataata aaaaatcgcc  
3781 ccaaagctct tcaaaaaat gaaaaacttg cattftaaagg cgattfttct agcaaaagag  
3841 attatggtc tftatftfta gaaagagat tftftftaaga agatgattft gtctftgcaac  
3901 tftgtcctft tftgcaactt gatggacaga tftftcaaaa atataaggga tftftftaatt  
3961 tftftaatca aacatattct tggatgaaac tftatfttatt agaataata aatgaacgat  
4021 tftgaatatga aaaattftaa caagattftg cfttatattga taactftftt aaattaccta  
4081 aagagctftga gaaaattagc gaaaaagaaa aagaaaagg ggaagaatat gtcgaactft  
4141 tftaatgatta tftggataag atgaataaaa gftftgctc tftattctgtt caaaattftat  
4201 atgaatattc tftftftacat tftftftftag cgactftgct tfttatatgtt tftcaaaaag  
4261 aattftgaaa acataaatat gaaatatatg ccgatagagg attgtattat tatcaggctc  
4321 tftaataagc tftaagctcatt tftftcaaat cfttataccat gftftgacgat aaaaaagat  
4381 atattftcat aaataaaaaa tftggatatac aagcagatga aaaaaataga ataatgaag  
4441 tcatctattt agatgaatta gctaaagcta tftftftgaaa tgatctftgaa gaagatgatc

4501 aaacttatgt gaaatthttta aacaccttaa atgaaaactt tgatgatgaa attgaatttg  
4561 aagaaaatat acaaacaaat caaacacttc ctacaaaaaa ggatttagat aaaagtattc  
4621 aagaaattat gcttgataat gagcttgcaa aactatcctt agatatacact ttttttaata  
4681 tcattaagca actttttcct tttacagaat tttttatgag tcagcctgat ttttttaaaa  
4741 aaatgattht atthttttata gattcaagct tagataaaaa gtattatggt aataaattat  
4801 tttctagtht taaagcacat ttttttaaaag aactagggat atthttatgctg cttaatccta  
4861 aagggcgtht tataaaaaatc atcccaaaaa gtaaaaagcc attcaataag ctttttttat  
4921 atcaaatagg aacaaattat tattatthtt gtcaatcaga atatgcaagc gagttgaaaa  
4981 aatcaaagag tttttcaaga ttggataaaag ctaagcaaat tcatttgata tcaaaaagcaa  
5041 gaaaacaatt agctattgat ttttctatta aagtaagtaa aaatthtaagt gcggatgtat  
5101 taaaaaattt agcaggttct tttattgata cactthttgcc tacaattat gaaagattaa  
5161 aaatthttata tgaaaaacta atgtatgaaa aattgactta caattatgat tttcctthtag  
5221 ctgtaaaaaa agaagagtac ataacctatc ctttattgat aaattctaga tttatgagtt  
5281 ttgattttatc tgagthttatt tttggthtctt tattgtgcac aggtgggctt aattattatc  
5341 ctagtattgc ttgcactaca acttcaagtg aagctagaga atthtgcctta aaaagacttht  
5401 tatcttataat tattthtagat gagaaaagaa gtgctthttat ggaagataaa atcaatgagg  
5461 gcaaatataat cttaaatgat aaggaattht ttgaaaaaaa caatatagaa cttagaaatt  
5521 gtaatatata taagctagaa cathtttcaa gaaaagaaga gtataaaaaca caaatccta  
5581 tgataaaaaca acaccctatc ttagcttata atgatactat acaaatthtt tatgaataca  
5641 taaatggaat ttacaatact atacaggatg aaaagggtaa ttttatagaa gataggcaaa  
5701 aggcaagaag attgatggaa aatthtagaag ccataggaca acataattht gaagtgatgt  
5761 ataaggggat gggagataag aagataaaaag atgaaaagaa aaatgaaaat gatgatgatg  
5821 aaagtgatga tattaataaa atacaagatt attctaataa gthttataggc aggctagcca  
5881 ctactataat catggaagat ggtthttata tgggataaat taagaaagga taaaagatga  
5941 gtgaaactta tgaaattht atgcctaag gtgttatatt agaagtagaa aaagaaacga  
6001 ataaaattht attaatgtat gggggagcta aggtaggcaa atacaccaa gaatattcta  
6061 aagcccttht tgaagcacac aatatcaaac aaaactctc ctacaaagac tatcaaccta  
6121 ggtatctaga tcctgaatth cacacagggc aaaaatccac tthtgcctgaa tthaaagatt  
6181 ggcaaagtat atatthtaaa gatcctatca aaggaagcat agctcctthg actaaagcag  
6241 aaaaagctta ttataactct ttaaaaacta aaaaagaaag atataaatat ttagthtataa  
6301 gaagtggat aagaagtgtt gttatagata taccttatga agctatagga gctgtagatg  
6361 aaaaaggaaa thtagatcct aagtatgaag aattatatag aacagtagat gataataaac  
6421 ataactaag atcaagthtt tttcataatg aatggggat ggcagcagga atactgggtg  
6481 attataaata tctagctaac gatatgtctc aaaatgthtt taatgcaaga tttatccaag  
6541 caactatact ttatatacaa ttaagtggag gaagtatgat actagataaa cctaatttht  
6601 tgggtgctat ttatgthttat gcagatattg cagtaggaag tggthttagta ggagtgcata  
6661 aaaatcctth aagagagcaa caaatthaaa ccttagctaa gactthtaaaa cctgatgaat  
6721 ttggtatgct tcctthttata gatgagatta tgggagtaga tthgggtgatt gattthaaata  
6781 aatatagatt agctaatgat gaatthgggg atatatataa agccttaaga agtgatgtag  
6841 ttgagggtaa gataaaagat ccaagggata tagattctac ttatgaaagc agaagggagt  
6901 ttgatcgtht tagagthtga tatagaaagg gtatgaggca aggtatgaa accgatacac  
6961 ccaatgattg gagtgaagaa agggcgcaac tthttaatga tactthtaata cttcatgcca  
7021 aactcgagc cctcactcct cctcaaggct atcctaagc acctthattat tttaccctg  
7081 aaaacctaga atggtattat aaaagacata agcttgataa actcctthgat ccaagaatcc  
7141 ctgctattht tagatataat thccaaggg aacttagagc taagatacta gcttatgcta  
7201 aagagtataa tatcaaatat taaaccacaa aagaaaggaa aaacaatgca aaaaacttht  
7261 caaatcgatt tagaaaaag aaaagcttht gagaatthtt aaaatctagc tttattagga  
7321 ttaggcggaa caatgcttht aaatthtaaa gaacagcctt tagatthttaa tcaagaatta  
7381 actta

//

LOCUS NLMPNJI\_4 6436 bp DNA linear 12-APR-2021  
DEFINITION Campylobacter species strain strain.  
ACCESSION  
VERSION

KEYWORDS .  
 SOURCE Campylobacter species  
 ORGANISM Campylobacter species  
 Unclassified.  
 COMMENT Annotated using prokka 1.14.6 from  
<https://github.com/tseemann/prokka>.  
 FEATURES Location/Qualifiers  
   source 1..6436  
           /organism="Campylobacter species"  
           /mol\_type="genomic DNA"  
           /strain="strain"  
   gene complement(305..1516)  
           /locus\_tag="NLMJPNJI\_00047"  
   CDS complement(305..1516)  
           /locus\_tag="NLMJPNJI\_00047"  
           /inference="ab initio prediction:Prodigal:002006"  
           /inference="similar to AA sequence:RefSeq:CKG86410.1"  
           /codon\_start=1  
           /transl\_table=11  
           /product="hypothetical protein"  
           /protein\_id="Prokka:NLMJPNJI\_00047"  
           /translation="MKYYVTIYIDELLEFQMIKDLLNMKGLDFTHAFLGLTKDKSPDE  
           LDKIDQEWYKAKETNKFNDGFWGFGTGTDSVYCTAGKVFNNNQYVLDNNVDKNRYIIK  
           KLRSPQTFKPSNRCTLEISKEQYETLLANIKADFEATKEITPNEKPIINEEFTYKLL  
           NNCVTWVVKLSSIGIEVNPVVKDPSGLLMATKLIQSIHSIFLKFQNIIDNLQSVKG  
           AKAFKNWARMLINNSLMQEIYLDEYKKQYNSENLSPEQEEVLYALWNITRVYKILDIL  
           LSRLITKSGTKNLKGFELIYFDRKDKQIKLLKADNDYEAIIIQDLDSLKYNFNSAS  
           KFYPFIFIPKDEMLSRPLYHKYDYGNISQEYQKDRNEFYFNVLAGEKSDKYWSSSYHK  
           MTKNLRKVYVS"  
   gene complement(1525..1983)  
           /locus\_tag="NLMJPNJI\_00048"  
   CDS complement(1525..1983)  
           /locus\_tag="NLMJPNJI\_00048"  
           /inference="ab initio prediction:Prodigal:002006"  
           /codon\_start=1  
           /transl\_table=11  
           /product="hypothetical protein"  
           /protein\_id="Prokka:NLMJPNJI\_00048"  
           /translation="MQIPIYSKLLKAKLESKGIDNISSQIAWFCVSVLALVTFLIIY  
           FTVIEDKNLFLAIFELFQWQLFIFIIYFCIPFNLLYIHNAIPLVLSAIFMFLTYFS  
           SLNLFIIIGCCGIGAFFLISIFKRKLMFSVLLFAMGYICIFYFLYAITRYH"  
   gene complement(2025..2204)  
           /locus\_tag="NLMJPNJI\_00049"  
   CDS complement(2025..2204)  
           /locus\_tag="NLMJPNJI\_00049"  
           /inference="ab initio prediction:Prodigal:002006"  
           /inference="similar to AA sequence:RefSeq:CKG86410.1"  
           /codon\_start=1  
           /transl\_table=11  
           /product="hypothetical protein"  
           /protein\_id="Prokka:NLMJPNJI\_00049"  
           /translation="MVECFDFKNQCYWQIEDFTHAFLGLTKGKSPDELDKIDEELRQ  
           EYLNKEFKLIKSIK"  
   gene complement(2234..2482)



CDS /locus\_tag="NLMJPNJI\_00050"  
 complement(2234..2482)  
 /locus\_tag="NLMJPNJI\_00050"  
 /inference="ab initio prediction:Prodigal:002006"  
 /codon\_start=1  
 /transl\_table=11  
 /product="hypothetical protein"  
 /protein\_id="Prokka:NLMJPNJI\_00050"  
 /translation="MWIVCIINFFNIKLNIPITLNWIISYCYFVLEINIYFILILCIT  
 LCVVFYFLQKRLLYTFLFYFVYMLTYTLFYLGGGFYK"

gene complement(2464..2724)  
 /locus\_tag="NLMJPNJI\_00051"

CDS complement(2464..2724)  
 /locus\_tag="NLMJPNJI\_00051"  
 /inference="ab initio prediction:Prodigal:002006"  
 /codon\_start=1  
 /transl\_table=11  
 /product="hypothetical protein"  
 /protein\_id="Prokka:NLMJPNJI\_00051"  
 /translation="MQIPIYSKLTCKLESKGIDNITSGQIAWFVCSVIFTYLLFLLIV  
 IINTRTISFENLKFFTFEGFFKSLAFIFANHFFYLFLCGLFV"

gene complement(2784..3020)  
 /locus\_tag="NLMJPNJI\_00052"

CDS complement(2784..3020)  
 /locus\_tag="NLMJPNJI\_00052"  
 /inference="ab initio prediction:Prodigal:002006"  
 /inference="similar to AA sequence:RefSeq:CKG86410.1"  
 /codon\_start=1  
 /transl\_table=11  
 /product="hypothetical protein"  
 /protein\_id="Prokka:NLMJPNJI\_00052"  
 /translation="MKEIIKYYVTIYIDELLENEMLKHVDFSLLFKAKFSQISKQIDF  
 THAFLGLTKDKSPDELDKIDEELRREYLKNKNSN"

gene complement(3017..3496)  
 /locus\_tag="NLMJPNJI\_00053"

CDS complement(3017..3496)  
 /locus\_tag="NLMJPNJI\_00053"  
 /inference="ab initio prediction:Prodigal:002006"  
 /codon\_start=1  
 /transl\_table=11  
 /product="hypothetical protein"  
 /protein\_id="Prokka:NLMJPNJI\_00053"  
 /translation="MQIPIYSKLTAKLESKGIDNISSGQIAWCLGSGYIALICAVFVW  
 VYKLNLEFELYIVFFFPIILFYIAIFWFIFLSFYKNFFVHLFCYSFMYIFNIIIFND  
 FYLNLVVMNILLITIWLFVVKLHLKFRFLFLMMYFCFEFAIFIGIIPYGLLEGTISK"

gene complement(3543..3716)  
 /locus\_tag="NLMJPNJI\_00054"

CDS complement(3543..3716)  
 /locus\_tag="NLMJPNJI\_00054"  
 /inference="ab initio prediction:Prodigal:002006"  
 /inference="similar to AA sequence:RefSeq:CKG86410.1"  
 /codon\_start=1  
 /transl\_table=11  
 /product="hypothetical protein"

```

/protein_id="Prokka:NLMJPNJI_00054"
/translation="MKYCATIYIDPLVECFDCENKNFINAEDFTHAFLGLTKGKSLD
ELDKIDKELRQKF"
gene complement(3713..4138)
/locus_tag="NLMJPNJI_00055"
CDS complement(3713..4138)
/locus_tag="NLMJPNJI_00055"
/inference="ab initio prediction:Prodigal:002006"
/inference="similar to AA sequence:RefSeq:CKG86435.1"
/codon_start=1
/transl_table=11
/product="hypothetical protein"
/protein_id="Prokka:NLMJPNJI_00055"
/translation="MQIPIYSKLGKLESKIDNITSGQIAWFVCSVGIFIIIPMMYFY
ISNNYDQFTILFIMIFIFILNMFYTKNFFALLLLVILIFIYMKYHEFIYNFKILFFIF
APIILIFLAWRILITFLCGYIFLVAMVYIFELLGGFYK"
gene complement(4180..4341)
/locus_tag="NLMJPNJI_00056"
CDS complement(4180..4341)
/locus_tag="NLMJPNJI_00056"
/inference="ab initio prediction:Prodigal:002006"
/codon_start=1
/transl_table=11
/product="hypothetical protein"
/protein_id="Prokka:NLMJPNJI_00056"
/translation="MLNWGFMMGSEGNPHVFLGLTKGKSPDELDKIDEELRQEYLKKN
EFKLIKSIK"
gene complement(4375..4974)
/locus_tag="NLMJPNJI_00057"
CDS complement(4375..4974)
/locus_tag="NLMJPNJI_00057"
/inference="ab initio prediction:Prodigal:002006"
/codon_start=1
/transl_table=11
/product="hypothetical protein"
/protein_id="Prokka:NLMJPNJI_00057"
/translation="MKYIILTFILGLIVFVSVKGCIFYPTSYRAFIPKSLDSEYKEFER
FSQQELGRVLYARPLTEIEKNCLNKNDFYIKTNRYGIKSKDMDMFGIEFIYSAERLV
YVIKELGYYGGWNKWKFNLFILPNITQRNYSIESITINNSQIMQNKEIIGNLKIGD
KLDRSYTYDYLNLVLENLLDKPSYLNHFEEYDYFEDL"
gene complement(4978..5082)
/locus_tag="NLMJPNJI_00058"
CDS complement(4978..5082)
/locus_tag="NLMJPNJI_00058"
/inference="ab initio prediction:Prodigal:002006"
/codon_start=1
/transl_table=11
/product="hypothetical protein"
/protein_id="Prokka:NLMJPNJI_00058"
/translation="MLDLMNENDENSTLAPLWLYADGVTNLKNHSKRQ"
gene complement(5326..5574)
/locus_tag="NLMJPNJI_00059"
CDS complement(5326..5574)
/locus_tag="NLMJPNJI_00059"

```

```

/inference="ab initio prediction:Prodigal:002006"
/codon_start=1
/transl_table=11
/product="hypothetical protein"
/protein_id="Prokka:NLMJPNJI_00059"
/translation="MFLLPVYLLFLAGGCSYQYMDPQYYEFGSLCYFNLEKVLIEDE
SIKNKTNIIIVPKSKQIKDRIVETRFERKNEKPSSVLS"
gene complement(5726..6094)
/locus_tag="NLMJPNJI_00060"
CDS complement(5726..6094)
/locus_tag="NLMJPNJI_00060"
/inference="ab initio prediction:Prodigal:002006"
/inference="similar to AA sequence:RefSeq:CKG86895.1"
/codon_start=1
/transl_table=11
/product="methyltransferase small"
/protein_id="Prokka:NLMJPNJI_00060"
/translation="MTNKEQINNLKDYTEFMQASYFNFVYTEGQKALGFKISKTRFFK
DKSELEKLDYFKALHDEYNGYLVIDDSLFFYAKLNGDFRELQARNFSQRYEIKFHQSN
TTSGFSAATLSYEKIERIKRN"
gene complement(6113..6352)
/locus_tag="NLMJPNJI_00061"
CDS complement(6113..6352)
/locus_tag="NLMJPNJI_00061"
/inference="ab initio prediction:Prodigal:002006"
/codon_start=1
/transl_table=11
/product="hypothetical protein"
/protein_id="Prokka:NLMJPNJI_00061"
/translation="MWLYIYYDDTYKTPSNFQEKIEMDNIALKTKNMQMSLHKIVDMY
ISPYWNTRRYVLEGNENMNFIEDELACGNLYQ"

```

ORIGIN

```

1 agaattctct aatatagaat aattaagcaa gcaaagttca tcatttttat aaaagatact
61 aagtcttcct aaaccactgc tttcatcttt aggagaaaaa taataactgg gtatatcttg
121 ttttatagta ttatcttgat ctaattctcc aaagtaaaaa ggattattag gaagttcggg
181 ggagcctgta aggagtatac cttgaaaata aattttagaa tgaattaaat caacattttt
241 agcccttaaa acttcacaat caatcacttc tttatcataa gcaaaaatcg tttcttttat
301 tttttcaaga gacatagact ttccttaaat ttttagtcat tttatgatag ctagaactcc
361 aatattttatc gcttttttct cctgctaaaa cattaaaata aaattcattt ctatcttttt
421 gatattcttg tgagatatta ccataatcat acttatgata aagcgttctt gagagcattt
481 catcttttagg tataaagata aaaggataaa atttactcgc actaaaatta ttatattttt
541 tacttaaatc caaatcttgt ataatgatag cttcataatc attatctgct tttaaaagtt
601 tgatttgttt atcttttcta tcaaaaataaa ttaattcaaa atcgcctttt aggttttttag
661 tgcccgattt tgtaattaaa cgacttaaaa gaatgtctaa aattttataa acccttgtaa
721 tattccataa agcatataaa acttcttctt gttctggact aagattttca ctattgtatt
781 gttttttata ttcatcaaga taaatcttct gcattaatga attattttata agcattctag
841 cccaattttt aaaagctttt gcacctttta cgctttgtaa attatcatca atgttttgaa
901 attttaaaaa gatagaatga atgctttgta ttaattttgt agccattaat aatccgctag
961 gatctttaac aacgggattt acaacttcta ttcctatgct agaaagcttt ttaacaaccc
1021 aagtaacgca attattttca agaagtttat aggtaaattc ttcattgatt ggcttttcgc
1081 tattaggtgt gatttctttt gtggcttcaa aatcagcttt aatatttgca agtaggggtt
1141 catattgttc cttagaaatt tctaaagtgc aacgattaga gggtttaaaa gtttgagggc
1201 ttcttagttt tttaataata tagcgatttt tatcaacatt attatctaata acatattggt
1261 tattattaaa tactttgcca gctgtacaat agacagaatc tgttccagtt ccaaaaaccc

```

1321 aaaaaccatc attgaattta ttggtttctt tagctttata ccattcttga tctatcttat  
1381 ccaactcatc aggactttta tctttggtaa gtcctaaaaa ggcgtgggtg aagtctaaac  
1441 ctttcatatt cagcaaatct tttatcattt gaaattctaa taactcatca atataaatcg  
1501 ttacataata cttcattttg ttccttaatg atagcgagtt attgctgtaa gaaaaaata  
1561 gatacaata taaccatag caacaacaa aacactaaac ataagctttc ttttaaaaat  
1621 ggatattaag aaaaatgctc ctataccaca acagccgata ataaataaat ttaagctaga  
1681 aaaatacaat gttaaaaaca taaatattgc agacagcact aaaggaatag cattatgaat  
1741 atataataga ttaaaagga tacaaaagta tatgataaaa ataaatagtt gccattgaaa  
1801 caattcaaat attgctaaaa ataaattttt atcttcaata atcactgtaa aatagataat  
1861 aagaaaagtc accaaagcaa gaactacact acacacaaac caagcaattt gtccacttga  
1921 tatgttgctc attcctttac tttctagttt tgctttgagt ttagaataaa taggaatttg  
1981 caaatctact cctaataatag ataaattggt ttattataac caatctactt aatactttta  
2041 attaatttaa attcctttggt ttttaagatat tcttgtctta attcttcatc tatttttatct  
2101 aactcatcag gacttttacc tttggtaagt ctaaaaaagg cgtgggtaaa atcttctatt  
2161 tgccaataac actgattttt aaaatccaaa aaacattcta ccaatggatc aatataaatt  
2221 gttacataat attttattta taaaatcctc caccaagata aaacaaagta taagttaata  
2281 ccatataaac aaaataaaat aaaaaagtat ataataatct tttttgtaaa aaataaaata  
2341 caacacaaag ggttatacat aaaatcaaaa taaaataaat attaatttca agaacaaaat  
2401 aacaatagct tattatccaa ttttagtgta ttggaattaa attttttata ttaaaaaaat  
2461 ttattataca aacaatccac ataaaaataa ataaaaaaaa tgatttgcaa aaataaaagc  
2521 aagagatttg aaaaaacctt caaaagtaaa aaatttaagg ttttcaaaag atattgttct  
2581 agtatttata attacaatta ataaaaataa taaataggta aaaattacac tacacacaaa  
2641 ccaagcaatt tgtccgcttg ttatattgtc ttttcttta ctttctagct ttgtttttaa  
2701 tttagaataa atagggattt gcaaatttac tcctaataca gataaattgt tttattataa  
2761 actaatttgc ttaaaatfff ttattaattt gaatffffgt ttttaagata ttctcgtctt  
2821 aattcttcat ctatffffatc taactcatca ggactffffat ctttggtaag tcctaaaaag  
2881 gcgtgggtga agtcgatttg cttagaattt tgagaaaatt ttgctttaa tagtaagaa  
2941 aatcaacat gctttaacat ttcattttct aataactcat ctatataaat tgttacataa  
3001 tattttatta tttctttcat tttgaaatag tcccttctaa aagtcataa ggtatgattc  
3061 ctataaatat cgcaaattca aaacaaaaat acatcattaa aaataaaaaat ctaattttta  
3121 aatgtaattt aacaaaaaag agccatattg ttattaataa aatattcatt accacaagat  
3181 ttaaataaaa atcattaaaa atttatataa agatatacat aaaagaatag caaaaaagat  
3241 gaacaaaaaa gaagttttta taaaaactta agaaaataaa ccaaaatata gcaatataaa  
3301 atagcaagat aggaaagaaa aaaacaatat aaagctcaaa ttccaaattc ttaagtttat  
3361 atacaacaac aaacacggca catattaagg caatatagcc actccctaaa caccaagcaa  
3421 tttgtccgct tgatatattg tctattcctt tgctttctag ttttgctttg agtttagaat  
3481 aaataggaat ttgcaaattt gtccttaata tagataaatt gttttattat aaactaattt  
3541 gcttaaaatt tttgtcttaa ttctttatct attttatcta actcatcaag acttttgcct  
3601 ttggtaagtc ctaaaaaggc gtgggtaaaa tcttccgcat taataaaatt tttattttcg  
3661 caatctaaaa aacattctac caatggatca atataaattg ttgcacaata cttcatttat  
3721 aaaatcctcc taataactca aatatatata ccatagccac taaaaaaata tatccgcata  
3781 aaaaagttat tagaattctc caagccctta aaaagataag aattataggt gcaaaaaata  
3841 aaaataaaat tttaaaatta tagataaact catgatattt catatatata aatatcaata  
3901 ttacaagtaa taataatgca aaaaaatfff tagtataaaa catatttaat ataaaaataa  
3961 atatcataat aaataaaata gtgaattgat cataattggt gctgatataa aaatacatca  
4021 taggaatgat aaaaatacct acgctacaca caaaccaagc aatttgtccg cttgttatat  
4081 tgtctattcc tttgctttct agttttgctt tgagttttaga ataaatagga atttgcaaat  
4141 ttactcctaa tatagataaa ttgttttatt ataaccaacc tacttaatac ttttaattaa  
4201 tttaaattct ttgtttttaa gatattcctg tcttaattct tcatctattt tatctaactc  
4261 atcgggactt ttgcctttgg taagccctaa gaacacatga gggtttcct cactgccat  
4321 cataaagccc caatttaaca tagattccaa gagagtattt gtaattaaaa gtcattataa  
4381 gtcctcaaaa taatcatagt tttcttcgaa atgattaaga tagcttgggt tgtctaataa  
4441 attttctaac acgagaatat tcagataatc ataagtataa gatctatcta atttatcacc  
4501 tattttttaga ttgcctatta tctctttggt ttgcattatt tgagagttgt ttattgtaat

```

4561 actctctatt gaattgtaat ttctttgtgt tatatttgga agaataaata aattaaattt
4621 ccacttattc caaccacat aatagcccaa ttcttttata taaacatata caagtctttc
4681 tgctgaatat ataaattcaa tacctacaaa catatccata tctttgctct taatgccata
4741 tcgatttggt ttgatataaa aatcattttt attgagacaa tttttttcta tttctgttaa
4801 aggtctagca taaagtactc tgcccaattc ttgtttgtgaa aatctttcaa actctttata
4861 ctcggaatct aagctttttg gtataaaagc acgataactt gtaggataaa aacaaccttt
4921 tactgaaaca aatacaatca aacctagaat aaaagtcaat ataatatatt tcatacttta
4981 ttgcctttta ctatgatttt ttagattagt taccatctct gcataaagcc ataaagggtgc
5041 aagggttgaa ttctcatcat tctcattcat taaatcaagc attgtataac tagcatctgc
5101 tatattagca tagtcaaaaa aatttagtga ttaagtctaa tttagcttct tgtgttttaa
5161 tgtttttgct catttgttat tccaaagctt caacttgcca atcatctttc ttaaattttt
5221 tgtcaatatt cttacaactt aatacttcca tatatctaaa atataatcca gcgcccctcat
5281 caccttttaa gaatatacca taattatcat aaaaatatgt attaattacg ataatacact
5341 acttgggtttt tcattttttc tttcaaactc agtttccact atcctatctt ttatttgctt
5401 acttttaggg gttactatta tattcgtttt attctttata gattcatcct caatcaacac
5461 tttttccaaa ttaaaataac acaagctccc aaactcataa tactgtggat ccatatattg
5521 ataagaacag ctcctgcta agaataacaa aagatataca ggcaaaagaa acaaagtaag
5581 ttttttaaat atttttttta aaatttatag tttttgtttt attttttatt ttaaaaaaga
5641 ttttaaagat aaaatataaa ataatagaaa atataaaaaac gaaaaaagaa aaatataaaa
5701 gattaataaaa gaattctagt gtctattaat tcctcttaat tctctctatt ttttcataag
5761 acaaagtagc actaaagcca cttgtagtgt tggactgatg aaatttaatc tcatatcttt
5821 gagaaaaatt tctagcttgt aattctctaa aatctccatt tagtttcgca taaaaaata
5881 aagaatcatc tataacccaa tatccattat attcatcatg taatgcttta aaatagtcca
5941 atttttctaa ttcactctta tctttaaaaa atctagtttt agatatttta aatcctaaag
6001 cttttgtcc ttcagtataa acaaaattaa aataactagc ttgcataaat tctgtataat
6061 cttttaaatt gttgatttgt tctttattgg tcattattta ttccttatat tattattgat
6121 aaagattgcc acaagcgagc tcacctctta taaactcaaa attcatatta ccctcattgc
6181 cttctaacac ataccttcta gtattccaat atggacttat atacatatca acaatcttgt
6241 gtaaagacat ttgcatatth tttgttttta gtgcaatatt atccatctct atcttttctt
6301 gaaaatttga aggagttttg taagtatcat cgtaatatat ataaagccac atttctatac
6361 taccatattt ttttacatgt cgaaaatcat ctatgtcacc taacttttta tcaaaatacc
6421 ctagaatctt attata

```

//

```

LOCUS      NLMJPNJI_5                2833 bp    DNA        linear      12-APR-2021
DEFINITION Campylobacter species strain strain.
ACCESSION
VERSION
KEYWORDS
SOURCE     Campylobacter species
  ORGANISM Campylobacter species
            Unclassified.
COMMENT    Annotated using prokka 1.14.6 from
            https://github.com/tseemann/prokka.
FEATURES   Location/Qualifiers
  source   1..2833
            /organism="Campylobacter species"
            /mol_type="genomic DNA"
            /strain="strain"
  gene     9..560
            /locus_tag="NLMJPNJI_00062"
  CDS     9..560
            /locus_tag="NLMJPNJI_00062"
            /inference="ab initio prediction:Prodigal:002006"
            /codon_start=1

```

```

/transl_table=11
/product="hypothetical protein"
/protein_id="Prokka:NLMJPNJI_00062"
/translation="MTFILGLIVFVSVKGC FYPTSYRAFIPKSLDSEYKEFERLCKEE
VGKVVYARPIKHGIKLEDLFNL PSTSRRVALSRHMYMLIENVTTREDEIFYLHIAGF
EYYTGWTRKSFSMHDDSKKYIRCEPLLYGKTWKENAKIMEQKAFDNKEYIGTEEYLRV
SPYHYEYNTLYRQIVNFKQKKEN"
gene 560..712
/locus_tag="NLMJPNJI_00063"
CDS 560..712
/locus_tag="NLMJPNJI_00063"
/inference="ab initio prediction:Prodigal:002006"
/codon_start=1
/transl_table=11
/product="hypothetical protein"
/protein_id="Prokka:NLMJPNJI_00063"
/translation="MIYNYKYS LGIYVNDWGFMMGSEGNPHVFLGLKREQVHCGDMQI
KNTIYK"
gene 765..1262
/locus_tag="NLMJPNJI_00064"
CDS 765..1262
/locus_tag="NLMJPNJI_00064"
/inference="ab initio prediction:Prodigal:002006"
/inference="similar to AA sequence:RefSeq:CKG86719.1"
/codon_start=1
/transl_table=11
/product="hypothetical protein"
/protein_id="Prokka:NLMJPNJI_00064"
/translation="MGDSITLSIFVGSLLSIAVITKFYLI ALSVLIVFSILNYWIKIN
IKEFVKSYFLISFIIFFTAIVIVFYLT YDLETSRGLVLLGPPEVEKLS PQEYKAHNYF
KFLTFTTMFFLAITFFILPCLLQAYL FKCYS TEERKKLSWFIGFACNIFLLIVSYK
LYENL"
gene 1249..1380
/locus_tag="NLMJPNJI_00065"
CDS 1249..1380
/locus_tag="NLMJPNJI_00065"
/inference="ab initio prediction:Prodigal:002006"
/inference="similar to AA sequence:RefSeq:CKG86746.1"
/codon_start=1
/transl_table=11
/product="hypothetical protein"
/protein_id="Prokka:NLMJPNJI_00065"
/translation="MKIFKDYQKFTPYGLDFKLYSKDFIAKLDFKDKAYNVLYDTGV"
gene 1381..1875
/locus_tag="NLMJPNJI_00066"
CDS 1381..1875
/locus_tag="NLMJPNJI_00066"
/inference="ab initio prediction:Prodigal:002006"
/inference="similar to AA sequence:RefSeq:CKG86719.1"
/codon_start=1
/transl_table=11
/product="hypothetical protein"
/protein_id="Prokka:NLMJPNJI_00066"
/translation="MGDSIALSIFWGLIGFIL TCSVIEFYLI ALSVLIVFSILNYWIK

```

INIKEFVKSYFLISFIIFFTAIVIIIFYLTYDLETSRGLVLLGPPEVEKLSPOEYKAHN  
YFGFLSGITIIFLVITFIILPCLLQAYLFKCYSTGEKRKLSWFIGVCNIFLLTASV  
YAMY"

ORIGIN

1 atattatatt gactttttatt ctaggtttga ttgtatttgt ttcagtaaaa ggttgttttt  
61 atcctacaag ttatcgtgct tttataccaa aaagcctaga ttccgagtat aaagagtttg  
121 aaagattatg taaagaggaa gtaggaaagg tagtatatgc aagacctata aaacatggta  
181 taaagttgga agatttgttt aacttgcctt ctacgagtgt tagacgtggt gctttaagca  
241 gacatatgta tatgttgata gaaaatgta caacaagaga agacgaaatt ttttacttac  
301 atatagctgg ttttgaatat tatacaggct ggacaagaaa aagtttttct atgcatgatg  
361 attctaaaaa atatataaga tgtgagcctt tgctttatgg taaaacttgg aaagaaaatg  
421 ctaagataat ggaacaaaag gcatttgata ataaagaata tataggcaca gaagaatatt  
481 tacgatattc accttatcat tatgagtata atacacttta tcgccaataa gttaatttca  
541 aacaaaagaa agagaattaa tgatatataa ttacaaatac tctcttgtaa tctatgttaa  
601 tgattggggc tttatgatgg gcagtgaggg aaaccctcat gtgttcttag gactaaaaag  
661 agagcaagtg cattgtggcg atatgcaaat aaaaaacaca atatataaat aaacttgatt  
721 ttaaagataa agcttataat gtgctttata atataggagt ttaaattgga gatagtatta  
781 cgctttctat tttttaggtt tcattgctat ccattgctgt taccacaaaa ttttatctta  
841 tagctttatc tgtgcttatt gtcttttcta ttttaaatta ttggattaag attaataata  
901 aagaatttgt aaaatcttat tttttaatat cttttattat cttttttaca gctattgtta  
961 tcgtatttta tcttacttat gatcttgaag cttctagggg gcttgtatta cttggtcctc  
1021 cagaagtga aaaattatca ccacaagaat ataaagcaca taattatttt aaatttttaa  
1081 cttttacaac tatgtttttt ttggcaatca ctttttttat actcccttgt ttattacaag  
1141 cttattttatt taaatgttat agcacagaag aaaaacgcaa aaaattaagt tggtttatag  
1201 ggtttgcgtg taatatcttt ttattaattg tgagttttta taagttatat gaaaatcttt  
1261 aaagactatc aaaaattcac tccttatggt ttggatttta aactttatag taaagatttt  
1321 attgccaaac ttgattttta agataaagct tataatgtgc tttatgatac aggagttaa  
1381 atgggagata gtattgcact ttctattttt tgggggttga taggatttat tcttacttgt  
1441 agtgttatag aattttatct tatagctcta agcgttctta ttgtcttttc tattttaaat  
1501 tattggatca agattaatat aaaagaattt gtaaaatctt attttttaat atcttttatt  
1561 atctttttta cagctattgt tatcatattt tatcttactt atgatcttga aacttctaga  
1621 gggcttgtat tacttgggtc tccagaagtt gaaaaattat caccacaaga atataaagca  
1681 cataattatt ttggattttt aagtgggata actattattt ttttagtaat cacatttatt  
1741 atactccctt gtttattaca agcttattta tttaaatgct atagcacagg agaaaaacgc  
1801 aaaaaattaa gttggtttat aggatttgtg tgcaatatct ttttattaac ggcgagtgtg  
1861 tatgcgatgt attaaaatct ttaaagactt ttaaaaaatt taatatattt gatataatat  
1921 ttatttatct taaatattta gagaaaaaat gaatagagaa ttatttataa caagacttgc  
1981 atttataaac aatgatgaaa taaataaaat aaataaaat tcatctattg catattttaa  
2041 agccttatat caatgtgaaa attccatagc tgtaaattat gatgaagaag agcttttcac  
2101 ccaaaccact gctataaaca atctaggata tggcaatgat ttcacaaaaa tcttcatcct  
2161 agataaagaa aacctcaatg acacctatct tgatgctaga aaaaagcttt ataaatctat  
2221 caatacttta aaagaagaaa aaaatgaaaa aataaaaaat atccaagctt atgtaataa  
2281 agaaaattcc ttgcaagaca atctaaataa tcaaagcttt aatactgagg aaaatgatct  
2341 taatttagct ttaaacgaag tatttaatat agaacaattt tatgataaaa ataccaatac  
2401 catagtatta aaaacaaata atataaaaaat catattctta gataaagtaa atttacaaga  
2461 tttacaatct aatactagta ataactcttt tatctctatg tcaaatttaa tccatattta  
2521 tgagaatcat tgtgatattt ttacaaaaga tagaagtatc ttagatataa aatttataga  
2581 agaaaaatat caaatagatt ttaaaagttt agatacaaaa atcttcctaa actccaccct  
2641 cttacaggc tccaccgaac tttctaataa tcctttttac tttggagaat tagatcaaga  
2701 taatcttata aaacaagata taccagttta ttatttttct ctaaagatg aaagcagtgg  
2761 ttttaggaaga cttagtatct tttataaaaa tgatgaactt tgcttgctta attattctat  
2821 attagagaat tct

//

LOCUS

NLMJPNJI\_6

1956 bp

DNA

linear

12-APR-2021

DEFINITION Campylobacter species strain strain.  
 ACCESSION  
 VERSION  
 KEYWORDS .  
 SOURCE Campylobacter species  
 ORGANISM Campylobacter species  
 Unclassified.  
 COMMENT Annotated using prokka 1.14.6 from  
<https://github.com/tseemann/prokka>.  
 FEATURES Location/Qualifiers  
     source 1..1956  
           /organism="Campylobacter species"  
           /mol\_type="genomic DNA"  
           /strain="strain"  
     gene 113..334  
           /locus\_tag="NLMJPNJI\_00067"  
     CDS 113..334  
           /locus\_tag="NLMJPNJI\_00067"  
           /inference="ab initio prediction:Prodigal:002006"  
           /inference="similar to AA sequence:RefSeq:CKG87598.1"  
           /codon\_start=1  
           /transl\_table=11  
           /product="methyltransferase small"  
           /protein\_id="Prokka:NLMJPNJI\_00067"  
           /translation="MSDEWITEESRNLGIVDKKDREKIANLLKKNNSNEVRKDLFHVD  
                   KKGNSVIKELDKNAKTKNLIERIENGKGY"  
     gene 318..965  
           /locus\_tag="NLMJPNJI\_00068"  
     CDS 318..965  
           /locus\_tag="NLMJPNJI\_00068"  
           /inference="ab initio prediction:Prodigal:002006"  
           /inference="similar to AA sequence:RefSeq:CKG87616.1"  
           /note="Domain of uncharacterised function (DUF1910)"  
           /codon\_start=1  
           /transl\_table=11  
           /product="hypothetical protein"  
           /protein\_id="Prokka:NLMJPNJI\_00068"  
           /translation="MVRDTSKDEAYFTKHIIECEEDIKESKILLELPLFGKRETCLFC  
                   ITDRKKCIAMDKYSRGDDINLVKKDLEALMLLRQKNRLELGGFDTSYRGNAIELCVR  
                   VLLDMDSACVLELIEEDERKKKIDIFNRDWFLLHFMGSKGKLNLERKCNCKEHELKEF  
                   VATKDIEFLHQYMKKHTRLRDLPLDWDLEGAAIVKLMNLDKEEFKSYKYPYDLI"  
     gene 1162..1815  
           /locus\_tag="NLMJPNJI\_00069"  
     CDS 1162..1815  
           /locus\_tag="NLMJPNJI\_00069"  
           /inference="ab initio prediction:Prodigal:002006"  
           /inference="similar to AA sequence:RefSeq:CKG87616.1"  
           /note="Domain of uncharacterised function (DUF1910)"  
           /codon\_start=1  
           /transl\_table=11  
           /product="hypothetical protein"  
           /protein\_id="Prokka:NLMJPNJI\_00069"  
           /translation="MLRDTKRDEAYFTKHIIECEEKIKEDEKRLLELPLGDARRENYF  
                   FSITDKKKCIAMDKYSRGDDINLVKKDLEALMLLRQKNRLELGGFDTSYRGNAIELC



VRVLLDMSACVLELIEEDERKKKIDIFNRDWF LHFMSGKGNLNLERKCNCKEHELK  
EFVATKDIEFLHQYMKKHTLRDPLD TDWLEGAIVKLMNLDKEEFKQYKYPYDLI"

ORIGIN

```
1 taaaattcat catggaattg atggaattta tcacaatcca aataaaaacc caaaatatat
61 catcgcagaa gctaagtttg gaacaagcaa attagataga aaaactaagc aaatgagtga
121 tgaatggata acagaagaga gtagaaatag acttggcatt gtagataaaa aagatagaga
181 aaaaatagca aatcttctta aaaaaaatag caatgaagtc agaaaagatt tatttcatgt
241 tgataaaaaa ggcaatgtga gtattaaaga attagataaa aatgcaaaaa caaaaaactt
301 aatagaaagg atagaaaatg gtaagggata ctagtaaaga tgaagcgtat tttacgaaac
361 atataataga gtgtgaagaa gatatacaaag aatccgaaaa aatactttta gagcttcctt
421 ttggaaaaag agaaacttgt cttttttgta taacagatag aaaaaaatgt attgctatgg
481 ataaatactc tcgtgggtgat gatataaatc tagttaaaaa agatttagaa gcacttatgc
541 tattaagaca aaaaaatcgt ttagaattag gtggatttga tactagcgat tatagaggaa
601 atgctattga actttgtgtt agagtattat tagatatgga tagtgcttgt gtattagaat
661 taatagaaga agatgagaga aagaaaaaag atatttttaa tagagattgg tttttacatt
721 ttatgggttc taagggtaaa aattttaaatt tagaacgcaa atgtaattgt aaagaacacg
781 agcttattaa agaatttgta gctactaagg atattgagtt tttacatcaa tatatgaaaa
841 aacatacaag attaagagat cctctagata cttgggatct tgaaggtgca gcaattgtaa
901 agctaatgaa tttagataaa gaagaattta aaagctataa atattttcct tatgatttaa
961 tttaatctta tttggttaac agaagagagt agaaatagac ttggcattgt agataaaaaa
1021 catagagaaa aaatagcaaa tcttcttgaa aaaaatagca atgaagtcag aaaagattta
1081 tttcatgttg atgaaggagg taaagaaact attgattatt tagataaaaa tgcaaataaa
1141 ataaaacca aaggataaaa aatgctaaga gatactaaga gagatgaagc gtattttacg
1201 aacatataa tagagtgtga agaaaaaatc aaagaagatg aaaaaagact cttagaactt
1261 ccactaggag atgcaagaag ggaaaattat ttttttctta taacagataa aaaaaaatgt
1321 attgctatgg ataaatactc tcgtgggtgat gatataaatc tagttaaaaa agatttagaa
1381 gcacttatgc tattaagaca aaaaaatcgt ttagaattag gtggatttga tactagcgat
1441 tatagaggaa atgctattga actttgtgtt agagtattat tagatatgga tagtgcttgt
1501 gtattagaat taatagaaga agatgagaga aagaaaaaag atatttttaa tagagattgg
1561 tttttacatt ttatgggttc taagggtaaa aattttaaatt tagaacgcaa atgtaattgt
1621 aaagaacacg agcttattaa agaatttgta gctactaagg atattgagtt tttacatcaa
1681 tatatgaaaa aacatacaag attaagagat cctctagata cttgggatct tgaaggtgca
1741 gcaattgtaa aactaatgaa tttagataaa gaagaattta aacaatacaa atactttcct
1801 tatgatttaa tttaatctta gtgggtttaa aaaccacaa ggcttttcat ggctaaaaaa
1861 agaacaatcc ttattcctag aataaaagat attaattgtaa gtcctgatac ttcttgtatg
1921 catcctatat tagaagataa tacttttagta tgctta
```

//

LOCUS NLMJPNJI\_7 1591 bp DNA linear 12-APR-2021

DEFINITION Campylobacter species strain strain.

ACCESSION

VERSION

KEYWORDS .

SOURCE Campylobacter species

ORGANISM Campylobacter species

Unclassified.

COMMENT Annotated using prokka 1.14.6 from  
<https://github.com/tseemann/prokka>.

FEATURES Location/Qualifiers

source 1..1591

/organism="Campylobacter species"

/mol\_type="genomic DNA"

/strain="strain"

gene complement(267..824)

/locus\_tag="NLMJPNJI\_00070"

CDS complement(267..824)  
 /locus\_tag="NLMJPNJI\_00070"  
 /inference="ab initio prediction:Prodigal:002006"  
 /inference="similar to AA sequence:RefSeq:CKG87579.1"  
 /codon\_start=1  
 /transl\_table=11  
 /product="hypothetical protein"  
 /protein\_id="Prokka:NLMJPNJI\_00070"  
 /translation="MTREQAELIIKEEKLIDTDWYPSYKHSGEFHLTMMWFSDNNKYE  
 AVYIGERGSVELEYSFDSEKEAIDKMLQMNYEQKKYDGGKDIKEYLTKEVALRIIKEEN  
 LEVIWYDEALKPMRAGIKHDKQRDKYISFITNAKAEIIIEWKSIEFDGDRYSETFKEML  
 NDENIALYALINRARMIKQNRISFT"

gene complement(838..1413)  
 /locus\_tag="NLMJPNJI\_00071"

CDS complement(838..1413)  
 /locus\_tag="NLMJPNJI\_00071"  
 /inference="ab initio prediction:Prodigal:002006"  
 /inference="similar to AA sequence:RefSeq:A0H52020.1"  
 /note="putative protein (DUF4237 domain)"  
 /codon\_start=1  
 /transl\_table=11  
 /product="hypothetical protein"  
 /protein\_id="Prokka:NLMJPNJI\_00071"  
 /translation="MLLYLENENKKGKVSDEKVEHLYKHNGIWPKNTPKPRSPDYIRKN  
 GRIKYPDDDGYKIPPKPREITLEKGTCLDRYGDNSGSFVCPFEKKGAISYEKRSLPY  
 EDNEAMQKTYKRYEVIEDINMENIERKIEMSGNRELKGGKIDKLEKNKFHSPKEGKIS  
 PYFDQEGGGTQIKLPISIIENLMQLGFIKQIP"

ORIGIN

```

1  ttgcatttca gcataattac ctttttgctg attatntttt aatgcttgta tttgctttgc
61  tctatcattt ttatnttttct tacttctttt atctcctatc ctttcccatc ttatcctatc
121 atactcagtc ttagcaagag gactagcttg tnttttagct aaagcaaatt gaatcttatt
181 ctttttaggt atagcaaatt ctagccatga aaagccttgt gggttntttaa acccactaag
241 attaaattaa attataagga aagtatnttac gtaaagctaa tcctatntttg cttaatcatt
301 ctggcacgat tgataagagc ataaagggct atatntttcat cgttaagcat ttccttaaaa
361 gtttcaactgt atctatcccc atcaaattca atacnttttcc attctataat ctctgctntta
421 gcattagtga taaaagaaat atatnttatct ctttgnttat cgtgntttgat acctgctcgc
481 attggntttaa gtgcttcatc ataccaaatc acttctagat tntcttcttt gatgattcct
541 agtgctactt cttttgnttag atatntctnta atgtcntttc catcgtatntt tntttgnttca
601 taattcatct gcaacatntt atcaatggct tctntttcac tatcaaaaga atactcaagt
661 tcaacactgc ccnttctcc aatataaaca gcttctgatt tattatntatc agaatcaaac
721 cacatagtaa gatgaaatnt tcctgaatgt ttataagaag gataccaatc tgtatcaatc
781 aactnttctt cttnttatgat taattctgct tgnttctctg tcatntntnta tcctntnta
841 tggatnttntg ttgataaagc ctaatntgat taagntnttct atggaaatag gaagntntaat
901 ctgtgntcct ccacctntct gatcaaagta tggagatant ttacctntct tntggggaatg
961 gaatntgntt tnttctntnta atnttgntcaat tntacctntt agnttctctat ntccactcat
1021 ntcaatctnt ctctcaatat tntccatant aatatctntct attactntcat atctntntata
1081 ggntntntntg atggctntcat tatctntcata aggcaatgat cttntntntcat aagatantntg
1141 tcctntntntc tctntcaaaag gacaaacaaa gctacctgaa ntatctccat atctgtctag
1201 cttntgntcct tnttctagag tgatnttctt tggntnttaggt gggatntntat agccatcatc
1261 atcaggatat ttaatcctac catntnttacg aatataatca ggactntctag gntntntggagt
1321 gntntnttaggc catantntcat tatgntntata aagatgaact tctntntcac ntacctntacc
1381 tntntntatnt tcatntntcca aatataaaaag catntntntgct ntctctntntac tntntntctct
1441 tctcctntctt tgtgctgctc ctaatntntacc tcctatcctt tccatctnta tcctatcata
1501 ctcaatctnta gcaagaggac tagctntntat tnttagctaaa gcaaatntnta tctntntctt

```

```

1561 tttaggtata gcaaatatag gatagccttt t
//
LOCUS      NLMJPNJI_8                1343 bp    DNA        linear      12-APR-2021
DEFINITION Campylobacter species strain strain.
ACCESSION
VERSION
KEYWORDS   .
SOURCE     Campylobacter species
  ORGANISM Campylobacter species
            Unclassified.
COMMENT    Annotated using prokka 1.14.6 from
            https://github.com/tseemann/prokka.
FEATURES   Location/Qualifiers
  source   1..1343
            /organism="Campylobacter species"
            /mol_type="genomic DNA"
            /strain="strain"
  gene     14..664
            /locus_tag="NLMJPNJI_00072"
  CDS      14..664
            /locus_tag="NLMJPNJI_00072"
            /inference="ab initio prediction:Prodigal:002006"
            /codon_start=1
            /transl_table=11
            /product="hypothetical protein"
            /protein_id="Prokka:NLMJPNJI_00072"
            /translation="MGLIGVSIKGYPIFAIPKKNKIQFALAKIQASPLAKIEHDRIRW
EGIGGKLAQAQRRRREKSKEKAKMLLYLENENKNDKIKQISISNIPKKPHWRESEED
ISKLYDYEQKSFNGNEVPYGTKHSVRPDLYKNGSSIEIKNYNLDKTSSANNLINI
ITKQYQQLQHLPPKTEQIFIIDSRGQNISKEIQEKIKQKIRIKLNCIDILIQFKTK"
  gene     679..1092
            /locus_tag="NLMJPNJI_00073"
  CDS      679..1092
            /locus_tag="NLMJPNJI_00073"
            /inference="ab initio prediction:Prodigal:002006"
            /inference="similar to AA sequence:RefSeq:A0H52023.1"
            /codon_start=1
            /transl_table=11
            /product="immunity protein 70"
            /protein_id="Prokka:NLMJPNJI_00073"
            /translation="MVGFSIDNLWYEIGSGDFLHAFFSNVAYHLEKGNWGSRFPIILMN
EVYQGKLNFSKASLALNELENIQKEFKNFTPKQIIWDIENLSLTPPWGDNISSDITDL
SNYFVTSDGNDFIELFKKVLQLADNEKANLTIKSF"
ORIGIN
  1  ttctgtttta caaatggggtt tgataggagt gagtataaaa ggctatccta tatttgctat
 61  acataaaaag aataagattc aatttgcttt agctaaaata caagctagtc ctcttgctaa
121  gattgagcat gataggataa gatgggaagg gataggaggt aaattaaag ctgcacaaag
181  aaggagaaga gaaaaaagta aagagaaagc aaaaatgctt ttatatgttg aaaatgaaaa
241  taaaaacgat agcaaaataa aacaaatata tatatcaaac atacctaaag aacctcattg
301  gcgagaatct gaagaagata tatcaaagtt atactatgat tatgaaaaac agaaatcttt
361  tcttaatggc aatgaagttc catacggaac aaaacattct gttcgtccag acttatataca
421  aatggttct agcattgaaa ttaaaaacta taatcttgat aaaacatcca gtgcaaacaa
481  ttaattaat attattacca aacaatatca acaaagattg caacatttgc caccaaaaac
541  tgaacaaatc ttcattatag actctagagg acaaaatata tctaaagaaa tacaagaaaa

```

```
601 aataaaacaa aaaattcgca ttaaattaaa ttgtgatata cttattcaat ttaaaactaa
661 gtaaatttaa gaagaataat ggtgggtttt agtatagata atctttggta tgaataggc
721 agtgggtgatt ttttacatgc attttttagc aatgtggctt atcatcttga aaaaggaac
781 tggggaagta gattccctat attaataaat gaagtatac aaggtaaatt aaattttca
841 aaagcttctt tagcgttaaa tgaactagag aatatacaaa aagaatttaa aaattttacc
901 ccaaaacaaa taatttggga tattgaaaac ttatctctta caccaccttg gggtgataat
961 atcagtagtg atattacaga cctatcaaat tattttgtaa caagcgatgg taatgatttt
1021 atagaactct ttaaaaaggt cttacaacta gctgacaatg aaaaagctaa cttaccatt
1081 aaaagttttt aaaataatta tactttggga aaaatttcta agtaaaaaca ccctaaaacc
1141 ctttccttta aattttgatt gctctttaga agaaaagctt ctttatacca aagataaaca
1201 actagaaaac atacttaaaa cccacaaggc ttttcatggc taaaaaaaga acaatcctta
1261 ttcttagaat aaaagatatt aatgtaagtc ctgatacttc ttgtatgcat cctatattag
1321 aagataatac ttagtatgct tta
```

//

LOCUS NLMJPNJI\_9 519 bp DNA linear 12-APR-2021

DEFINITION Campylobacter species strain strain.

ACCESSION

VERSION

KEYWORDS .

SOURCE Campylobacter species

ORGANISM Campylobacter species  
Unclassified.

COMMENT Annotated using prokka 1.14.6 from  
<https://github.com/tseemann/prokka>.

FEATURES Location/Qualifiers

source

1..519

/organism="Campylobacter species"

/mol\_type="genomic DNA"

/strain="strain"

gene

113..277

/locus\_tag="NLMJPNJI\_00074"

CDS

113..277

/locus\_tag="NLMJPNJI\_00074"

/inference="ab initio prediction:Prodigal:002006"

/codon\_start=1

/transl\_table=11

/product="hypothetical protein"

/protein\_id="Prokka:NLMJPNJI\_00074"

/translation="MSDEWLIKLNKLRKLNVDGVEVEAEKIANLLKKIAMKSEKIYFML  
IKKAM\*VLKN"

ORIGIN

```
1 taaaattcat catggaattg atggaattta tcacaatcca aataaaaacc caaatatat
61 catcgagaa gctaagtttg gaacaagcaa attagataga aaaactaagc aatgagtga
121 tgaatggta ataaagaata aactaaaacg gcttaaaaat gatgtaggag aagtagaagc
181 tgaaaaaata gcaaatcttc ttaaaaaaat agcaatgaag tcagaaaaga tttatttcat
241 gttgataaaa aaggcaatgt gagtattaaa gaattagata aaaatgcaaa aaccaaaaac
301 ttaatagaaa ggataaaaaa tgctaagaga tacgaagaga gatgaagcgt attttacgaa
361 acatataata gagtgtgaag aaaaaattaa aaaatccgaa aaaatacttt tagagcttcc
421 ttttgaaaa agagaaactt gtcttttttg tataacagat agaaaaaaat gtattgctat
481 ggataaatac tctcgtggtg atgatataaa tctagttaa
```

//

>>BfR-CA-15875\_min\_cov\_30 putative plasmid location

LOCUS JIMAIPOP\_1 7184 bp DNA linear 12-APR-2021  
 DEFINITION Campylobacter species strain strain.  
 ACCESSION  
 VERSION  
 KEYWORDS .  
 SOURCE Campylobacter species  
 ORGANISM Campylobacter species  
 Unclassified.  
 COMMENT Annotated using prokka 1.14.6 from  
<https://github.com/tseemann/prokka>.  
 FEATURES Location/Qualifiers  
     source 1..7184  
         /organism="Campylobacter species"  
         /mol\_type="genomic DNA"  
         /strain="strain"  
     gene 348..851  
         /locus\_tag="JIMAIPOP\_00001"  
     CDS 348..851  
         /locus\_tag="JIMAIPOP\_00001"  
         /inference="ab initio prediction:Prodigal:002006"  
         /codon\_start=1  
         /transl\_table=11  
         /product="hypothetical protein"  
         /protein\_id="Prokka:JIMAIPOP\_00001"  
         /translation="MKILEKDFDLICKIYIQWKELNNNIKKFSSRGVNFPCISEPIV  
         CYAFNYNWNNNNETGDATSDSGELIEIKATSNFNSDLSSFPNTKFDKLI FVRLDQER  
         DLAYIYDLELNFEQFQILEVNKKETVLDQQKQNRPRRLSLIQYIEKEKIEPLYVDFI  
         KKIVTKN"  
     gene 921..1844  
         /locus\_tag="JIMAIPOP\_00002"  
     CDS 921..1844  
         /locus\_tag="JIMAIPOP\_00002"  
         /inference="ab initio prediction:Prodigal:002006"  
         /inference="similar to AA sequence:RefSeq:ASE91810.1"  
         /codon\_start=1  
         /transl\_table=11  
         /product="DNA (cytosine-5-)-methyltransferase"  
         /protein\_id="Prokka:JIMAIPOP\_00002"  
         /translation="MKVASFFAGVGGIDLAFSNHDIVVNEIDKNATKTYKFNFDVEI  
         DCRDIQTVNEKELPDFDILLGGFPCQAFSVAGYRKGFEFSRGNLFFDIIRIAKEKKPK  
         IIFLENVKNLVSHDCGKTFNIIKLSLES LGYYVKYDVLNAMHYGNTPQNRERIYVCF  
         KNKKQYKDFNPNPIFLNKKIDNIVDFNLKVDDKFYYTEKNFKHYEMLLQNITKKNVI  
         YQWRRKYVRENKSNVCPTLTANMGTGGHNVPVLVTKHGIRKLTPEKCFMFQGFPNYSYK  
         LPDIANSHLYKQAGNSVCVKVIQRIADRISN"  
     gene complement(2128..2328)  
         /locus\_tag="JIMAIPOP\_00003"  
     CDS complement(2128..2328)  
         /locus\_tag="JIMAIPOP\_00003"  
         /inference="ab initio prediction:Prodigal:002006"  
         /codon\_start=1  
         /transl\_table=11  
         /product="hypothetical protein"  
         /protein\_id="Prokka:JIMAIPOP\_00003"  
         /translation="MGFKNINTEKASINFINNARGDKINTQKRDKKILVSFTQDEYDR

VKESALQIGMGVNQYIRYKLFI"  
 gene complement(2329..3009)  
 /locus\_tag="JIMAIPOP\_00004"  
 CDS complement(2329..3009)  
 /locus\_tag="JIMAIPOP\_00004"  
 /inference="ab initio prediction:Prodigal:002006"  
 /inference="similar to AA sequence:RefSeq:ASI88294.1"  
 /codon\_start=1  
 /transl\_table=11  
 /product="Plasmid partitioning protein ParA"  
 /protein\_id="Prokka:JIMAIPOP\_00004"  
 /translation="MIISICNEKGGSGKSTLAVNLSRLTEDGDSILLFSDPQRSTE  
 VFINIRNNSNLKQNFKHSFDINLLNSGFKNELNNDYDAIIDIIDTGGGRDSREMRKAMLLSN  
 VIIIPTIASQYDVSVDHMLNIYKEVKLINKNIILLILINRVSPNPFLLIKELNNLIDY  
 IHEKKEVNNLNDVFLLESVLYERQAYKRAVIEGKSISEFCDKNDKALKDFEKFYQEIF  
 QILKNKDK"  
 gene complement(3542..4945)  
 /locus\_tag="JIMAIPOP\_00005"  
 CDS complement(3542..4945)  
 /locus\_tag="JIMAIPOP\_00005"  
 /inference="ab initio prediction:Prodigal:002006"  
 /codon\_start=1  
 /transl\_table=11  
 /product="hypothetical protein"  
 /protein\_id="Prokka:JIMAIPOP\_00005"  
 /translation="MSYDEIEKVKRSAYTKTASESTKRNYISSGNFKKSTSFQVFHNA  
 NVRPDYAIGGELVFDLGGYEAL ELKNKIVSEAKEAYEKNKSPKAPKFKAKSYEWSLVV  
 NIKPDTSMNDLKNLSKHFQEKYGFQCYQIAIHRDEGHFNEQGEKLINHHAHMEFITLD  
 KETGKNNFRREKISPKVLREIQTEIAEILGMERGEDKRISGAKRIEPRAYAALKEKEK  
 REKKRNINLEQEKGFQFLNKSEYKKIENFRKSQINQGLDKDFFKELSELKNFQEAKE  
 DDLSELLNDILREHLERIEKLLKENSILKAENELLKQKEQKNDKSIDQEKNASERNF  
 EPKNDKISKLEDDFNFKVKNINPNDMSEENYFKLKKLYTENYDNLAEDKSFPNYDYLVN  
 FFKKAPQNINDLIVQKASIMKDVELQENIQFYLLKKTLEKHSKDHTQNLVKTDTDKTIKT  
 TKNYHQNYLKKGLGFER"  
 gene complement(4949..5113)  
 /locus\_tag="JIMAIPOP\_00006"  
 CDS complement(4949..5113)  
 /locus\_tag="JIMAIPOP\_00006"  
 /inference="ab initio prediction:Prodigal:002006"  
 /codon\_start=1  
 /transl\_table=11  
 /product="hypothetical protein"  
 /protein\_id="Prokka:JIMAIPOP\_00006"  
 /translation="MDYEKYSKMNLRLINAYTNAEKKEKLLIDDFQKKLDENKNLME  
 FLKTKIKESL"  
 gene complement(5515..5850)  
 /locus\_tag="JIMAIPOP\_00007"  
 CDS complement(5515..5850)  
 /locus\_tag="JIMAIPOP\_00007"  
 /inference="ab initio prediction:Prodigal:002006"  
 /codon\_start=1  
 /transl\_table=11  
 /product="hypothetical protein"  
 /protein\_id="Prokka:JIMAIPOP\_00007"

```

/translation="MSEKTKLQIAEHILKNCYWGNTTMTSPFIVEHIQDKDFAKRIFS
AIFQNSLTMFEDLKIIDNEEWIKEFIISQNLQRLGYHKRFYEEERLDELIAHYGIKNAG
KRREVFHIA"
gene      complement(5847..6884)
          /locus_tag="JIMAIPOP_00008"
CDS       complement(5847..6884)
          /locus_tag="JIMAIPOP_00008"
          /inference="ab initio prediction:Prodigal:002006"
          /inference="similar to AA sequence:RefSeq:ALW35761.1"
          /codon_start=1
          /transl_table=11
          /product="replication initiation protein"
          /protein_id="Prokka:JIMAIPOP_00008"
          /translation="MSDIVKYHNDFNKIQLPNFSEQEQNLLFLIFAKIKEKGIDNVIN
IYANDFKINQKLSNSREYL TENINSLKYKFFKANFKQIIETKTEVIHKYVNL FETMEI
HYVKRNPDDGYDGSTLFNRITL KINPDFAYLVNQLTTNFTAFELEEFISLSGRYAKTL
YRLLKQFRTTGKARFEWEEFCRIMDIPQDYRQSEIDKRIIKPAIKELSKERNLFDQMR
VPFKNLAYEKEKAKGRGQGGKVSGITFTFKPENIEMQKLENESQKIMSDEQKYLKILN
NMKLNQVRFNYNDKLWQFNDFDFNEFKIIAVELIRDEYENLNFNGHMYFNAKNQEQQF
KMIEIFRKGIR"

```

ORIGIN

```

1 tcaaggcggga tttttattgt agcatgttaa gggatatattg tcaatatattg tccccttaat
61 acctacaatt tgtcccctta atacctacaa tttgtcccct taatacctac aatttgtccc
121 cttaatacct acaatttgtc cccttaatat tccatatagc tcccatcata tagtgcttag
181 aaagatgcct aaaaataata aaaataataa aaaaatagaa aatattacc atagtcttcta
241 aatctactaa atatatttat gatttattgt attcttaca tgaaatagta gtaaactcgag
301 atttaaaaaat attttgtata taatattaaa gtttagacgc aagttgtatg aaaatacttg
361 aaaaagattt tgacttaatt tgtaaaattt atattcaatg gaaagaatta aataataaca
421 taaaaaaatt tagttctaga ggtgtaaatt ttcttgattg tatttccgaa cctatagtat
481 gctatgcttt caactataat tggaataaca ataacgaaac aggagatgct actagtgatt
541 caggtgaatt aatagaaata aaagcgactt caaatttcaa tagcgattta agttcttttt
601 cgccaaatac taaatttgat aagctaattt ttgttagatt agatcaagaa agggatttag
661 cttatattta tgatttggaa ttaaattttg aacaatttca aattctagaa gtgaataaaa
721 aggaaactgt ttagatcaa caaaaacaaa ataggcgtcc taggttaagt ttaattcaat
781 atattgaaaa ggaaaagata gaaccgcttt attatggtga ttttataaaa aaaatagtta
841 ccaaaaatta aagaaaggag tggcgtctaa actcctttct ttaaaaaagc agcatgctgc
901 aattataatg gagataaaat atgaaagtgg cttctttttt tgccggtgta ggtggattg
961 atttggcctt tagtaatcat gatatcgttt atgttaatga aatagataaa aatgctacaa
1021 aacatataa atttaatttt gatgtcgaaa tagattgcag ggatatacaa actgttaatg
1081 aaaaagaatt gcccgatttt gatattttat taggagggtt tccatgcaa gcattcagtg
1141 ttgctggtta tagaaaagga tttgaagatt ctagaggaaa tctttttttc gatattatac
1201 ggattgcaaa agaaaaaaaa ccaaaaataa tatttctaga aatgtaaaa aatttggtat
1261 cgcattgattg tggaaaaact ttaaatatta tattaatac attggaaagt ttaggttatt
1321 atgttaaata tgatgtttta aatgcaatgc attatggaaa tacaccacaa aatagagaaa
1381 gaatttatat tgtttgtttt aaaaataaga aacaataata agattttaat tttccaacc
1441 caattttttt gaacaataaa atagacaata ttgtagattt taatttaaaa gtagatgata
1501 aattttatta tactgaaaaa aattttaaac attatgaaat gttattgcaa aatatacaa
1561 aaaaaaatgt tatttatcaa tggagaagaa aatatgtaag agaaaaataa agcaatgtat
1621 gtcctacttt aacagcaaat atgggtactg gtggacacaa tgtaccgta gtcttaacaa
1681 aacatggaat aagaaaacta acccctaaag aatgctttat gtttcaaggt tttcaaata
1741 gttataaatt acctgatata gcaaatagcc atttatataa acaagcagga aatagtgtat
1801 gcgtcaaagt gatacagcgt atagcagatc gtatttcaaa ttagaaaaat ttttatattt
1861 tatttggtaa acaaccttta tatgattttt aaaattaaaa aaattctgat ttaaaatata
1921 gttaaagttt ttaaaaaact taaagcaata aattcccatt tttccataac ttaaagtttt

```

1981 taacttttta cctcgaaact taaatataaa acaaaatgca ttaaaacaat ggagtagcca  
2041 tatttttatc aaaaaatata aagaatgaaa attgcacttt tcaatacaaa atatatttta  
2101 catatttata taaaatata atatttatta tataaataat ttatatctta tatactgatt  
2161 aactcccata cctatttgca aagcactttc ttccacacgg tcatactcat cctgtgtgaa  
2221 actaaccaat atttttttat ctcttttttg tgtattaatt ttatctccac gagcattatt  
2281 aataaaatta ataccttgctt tttctgtggt gatattttta aaccccattht atttatcctt  
2341 attttttaat atttgaaaaa tttcttgata aaatttttca aaatctttca atgctttatc  
2401 atttttatca caaaactcac taatactctt tccttctatt acggctcttt tgtaggcttg  
2461 cctttcatat aaaacgcttt ctagcaaaaa gacatcattt aaattattga cttctttttt  
2521 ctcgtgaata taatcaatta gattatttaa ttctttaatt aaaaatggat taggagagac  
2581 tctattgatt aatattaata atataatatt tttatttatt aatttaactt ctttatatat  
2641 atttaacata tgatcaagaa cacttacatc atattggcta gctatggtag gtataattat  
2701 tacatttgat aaaagcatag cttttctcat ttctctacta tctctaccac ctgtatcaat  
2761 aataatagca tcgtaattgt ttaattcatt tttaaaacca ctatttagca aattaatatc  
2821 aaaactgtgt ttaaaattht gttttaagtt agagttgtht ctgatattga taaaacttc  
2881 agtcgatctt tgcggatcac tgtcaaacag taaaatgctg tcaccatctt cagttaatct  
2941 tgaagataaa ttaacagcta aagtgtttt accactaccg cttttttcat tgcataataga  
3001 tataatcatt atatactctt tataattht ttatattht attatatact attttttgag  
3061 taattgatca aaaaattgat ttttgcttht ttaaaaagtt tacatttata ccttttgccc  
3121 ttttaatatt tcgctatact ccatcatata gtgcttagaa agccccttaa aaatataaaa  
3181 aatataataa aaataaaaaa atacacaacc cgcacattht taaaaagaaa aaagaaaaag  
3241 aagcaaaaag aaaaaagaaa aagatatttc aagataagaa taaatttht aaataaagtc  
3301 aattagatac tttggactat aaaaatcaaa aatataaata tatacgatac aaccattaaa  
3361 aagttgtatg aaaaaataa ggagtttht tgaataaaat atataattht atacataaac  
3421 ttttatacga tcttttgat gatcttttgat atgattatat acaatacaac atatacatat  
3481 atattthttaa atcacactaa atataatga taatttht aactaaaaaa aggagggagt  
3541 gtcacttttc aaatcccaaa ctttttttht gatagtttht gtgataattht ttagttgtht  
3601 ttatagtctt gtcagttgtht ttaactaagt tttgctgatg atctttgcta tgcttttcaa  
3661 gtgthttctt aagatagaat tgtatatttht ctgcaattht aacatcttht ataattgaag  
3721 ctttttgcac tattaaatca ttaatatttht gtgggtgcttht cttaaagaaa tttactaagt  
3781 aatcatagtt tggaaagctc ttatcttctg ctaaattatc gtaattthtca gtgtaaagtt  
3841 ttttaagtht gaaatagtht tcttcaactca tatcatttht attaatattt tttacaaaat  
3901 tgaatcatc ttctagtht gaaatttht cgthtttctg ctcgaaattg cgttctgaag  
3961 cgthtttttg ctcttggtcg atacttht cgthtttttg ctctttttgc tttaaaagct  
4021 cattttcggc ttttaaaatg ctattctctt tttthtactt ttcaatgctg tctaaatgct  
4081 ctctthttaa atcgtthttaa agttctgata aatcatcttht ttttgcttct tggagthtct  
4141 ttttaagtht gcttaactct ttgaagaaat ctttgcaag cccttgatta atthgacttht  
4201 ttctaaaatt ttcaatgatt tttttatact cgctthtatt taaaattgct cttttttctt  
4261 gctctaaatt aatgthtctg tttttctccc ttttttctt ttctthttaa gctgcataag  
4321 ctctaggctc tatgcttht gctccgctta ttctcttatc ttccgacgc tccattccta  
4381 agatttcagc gatttcgtht tgaatttht ttaagacttht tgggcttht ttttcacgct  
4441 taaagtht tttacctgtht tctthtgtcaa gagtgataaa ttccatattg gcgtggtggt  
4501 ttataagctt ttcgccttht tcgthttaa atgccctcatc gcggtgtata gcgatttgat  
4561 agcactgaaa gccgtatttht tcttgaaaat gthttagaaag gthttthttaa tcatthtctg  
4621 aggtatcagg ctthgatattg acaactaagc tccattcata gctcttagct ttaatttht  
4681 gagctthtggg gctthtattt ttttcatagg ctctthtctg ttccgaaact atctthttht  
4741 taagctctaa ggcttctaaa ccgcctaaat caaaaacaag ctcaccgctt atthgctaat  
4801 caggtcttac atthggcatta tggaaagact gaaaagaagt tgattthttaa aaattthtctg  
4861 ttgaaatata atthcttht gtgctthtca ttgcaatttht tgtgtaagca ctctthttaa  
4921 cttthtcaat ctcatcgtaa gacatttht ataaacttht tthgatttht gthttthttaa  
4981 actccattaa atthttattc tcatcaagtht tthtttgaaa atcatcgatt aaattthttht  
5041 cttthtttht tgcgthttht taagcgttht tcaattgctt taaattcatt ttagaatatt  
5101 tttcataatc cattthtttht cttthtttht aaaaatata atgtaatcga gctthtggaga  
5161 ttatagcata tttthttaa acaatttht gaactthtt agttcggata atthtcaaat



5221 tatccaatca tatttataaa taaaaaaatg attaataatt tgcaccgcgt ggctttgcat  
5281 taattcgcaa gctcatttaa tgtaaaagta ttaaataaaa ttatttatga tagaatttta  
5341 tttgacttcc taaatgaaag tttagcgaag aattagctta tcttttagat aggttgcccc  
5401 gtcttagagc ggggatatta aattccttgc ttattgtatt taggacattc aaatattcta  
5461 tcttttaaat ttaaatcatc tttgatatat ccataacaac tacaagtttt agagctaggc  
5521 aatgaaatgc acttctcttc tttttcctgc attttttatc ccataatgtg cgataagctc  
5581 gtcaagcctt tcttcataat aaaatctttt gtgatagcct aatctttggt tttgagaaat  
5641 gataaattct tttatccatt cttcattatc gataatcttt aaatcttcaa acattgtgag  
5701 tgaattttga aaaatggcac taaaaattct ttttgcaaag tctttatctt gtatatgttc  
5761 tactataaaa ctaggggtca tagtagtatt tccccaatag caatttttta aaatatgttc  
5821 tgcgatttga agttttgttt tttcgctcat ctgatacctt ttctaaagat ttcaatcatt  
5881 ttaaaaaact gctcttgatt ttttagcatta aagtacatat gatttccaaa gtttaaatc  
5941 tcgtattcat ctcttataag ctctactgca ataattttta attcattaaa atcaaaatcg  
6001 ttaaaatgcc aaagcttgtc attataatta aatctaactt gattaagttt catattgttt  
6061 aaaatcttta aatatttttg ctcatcgctc attatttttt gactttcatt ttctagcttt  
6121 tgcatttcga tattttcagg tttaaaagta aaggtaatac ctgaaacctt gccaccttgc  
6181 cccccccctt ttgctttttc tttttcatag gcaagatttt taaaaggcac tcgcatttga  
6241 tcaaaaagat tgcgttcttt agaaagtctt tttatggcag gtttaataat tcttttatcg  
6301 atttcgcttt gtctataatc ttgcggtata tccataatcc taaaaaactc ttcccattca  
6361 aatcgtgctt tacctgtagt tctaaattgc tttaaaaggc ggtaaagtgt tttagcatat  
6421 ctaccgctaa gagatataaa ttcttcaagc tcaaaagctg taaaattagt agttaattga  
6481 ttaactaaat aagcaaaatc agggtttatt tttagggtta ttctgttaaa taaagtgctt  
6541 ccatcatatc catcatcagg atttctttta acatagtgta tttccattgt ttcaaacaaa  
6601 tttacatatt tgtgtataac ttctgtcttt gtttctatga tttgtttaaa atttgccttg  
6661 aagaatttat attttaggct attgatattc tctgttaaat attctcttga attagaaagt  
6721 ttttgattaa ttttaaaatc attggcatag atattaatta cattgtctat acccttttct  
6781 ttaatctttg caaagattaa aaataaaagg ttttgctctt gctctgaaaa gttaggcaac  
6841 tgaattttat taaaatcatt atgggtattta actatatcac tcatagattt tccttataag  
6901 ccctaaggca aggggctttt ctgcccctgc ggtttcgcta gaaaaatact tcaactttaa  
6961 gtttaaaaaa cctaaaatc aggtataatc tcacaaaacg cttactatgt cgtttcatag  
7021 ttaagccttt agggttatct cgcgaagag tgaaaaactca aggcggattt ttattgtagc  
7081 atgttaaggg tatattgtca atatttgtcc ccttaatacc tacaatttgt ccccttaata  
7141 cctacaattt gtccccttaa tacctacaat ttgtcccctt aata

//
