# Supplementary material for: Characterization of Campylobacter spp. Strains Isolated From Wild Birds in Turkey
Source: PubMed Central journal article supplement (PMC8416542; doi:10.3389/fmicb.2021.712106), 2021-08-18
Supplement: Table_6.pdf [file Table_6.pdf]

LOCUS DMACINML\_1 261035 bp DNA linear 16-DEC-2020  
 DEFINITION Campylobacter species strain strain.  
 ACCESSION  
 VERSION  
 KEYWORDS .  
 SOURCE Campylobacter species  
 ORGANISM Campylobacter species  
 Unclassified.  
 COMMENT Annotated using prokka 1.13 from  
<https://github.com/tseemann/prokka>.  
 FEATURES Location/Qualifiers  
     source 1..261035  
           /organism="Campylobacter species"  
           /mol\_type="genomic DNA"  
           /strain="strain"  
     gene 237..1007  
           /gene="hisJ"  
           /locus\_tag="DMACINML\_00001"  
     CDS 237..1007  
           /gene="hisJ"  
           /locus\_tag="DMACINML\_00001"  
           /inference="ab initio prediction:Prodigal:2.6"  
           /inference="similar to AA sequence:RefSeq:CAL34871.1"  
           /codon\_start=1  
           /transl\_table=11  
           /product="histidine-binding protein precursor"  
           /protein\_id="Prokka:DMACINML\_00001"  
           /translation="MKKFLTAFLVAFTGLFLVACQNTKTENNASNEANTTLTKVGT  
           PNYKPFNYKQDSKLTGFDTLVEEIAQKNGIEIVVETNFDGLIPALKAGKIDMIASA  
           MSATDERRQSVDFTKPYMSKNLYIKLKNNEALQTKTDLEGKKIGVQLGTLQENTAKT  
           IKDAQIQSNKDLNIAVLALKNNKIDAIVAEDTAKGFLAENSDLVSFYQETDGGEGFS  
           FAFDKDKQKEVIEIFNEGIDEAKASGFYDNLIKKYELE"  
     sig\_peptide 237..296  
           /gene="hisJ"  
           /locus\_tag="DMACINML\_00001"  
           /inference="ab initio prediction:SignalP:4.1"  
           /note="predicted cleavage at residue 20"  
     gene 1394..2377  
           /gene="corA"  
           /locus\_tag="DMACINML\_00002"  
     CDS 1394..2377  
           /gene="corA"  
           /locus\_tag="DMACINML\_00002"  
           /inference="ab initio prediction:Prodigal:2.6"  
           /inference="similar to AA sequence:RefSeq:CAL34863.1"  
           /codon\_start=1  
           /transl\_table=11  
           /product="magnesium and cobalt transport protein"  
           /protein\_id="Prokka:DMACINML\_00002"  
           /translation="MLYIYIKTQNALVQRINFNLDNQELPQNILWIDLLHPSAAEIAF  
           ISNEFNLEFPTKEEREEIELSAKYWEDNATITINAHFLIREFKNDNEEQNSIKLRTEI  
           VTFATAKNILFTIRYNEFSTFEEIQARILASPKNFEDGFDIIDKMFVVRVEKDADLLE  
           WIDKEARRLRRTTVLEKKDEYSYDEMLKDISSLQELNMRVRDSLFDKRRAMTSLKSDK  
           IDRDIKQNLTIVLKDLNSLVEFSVSQLNVLVDNIQTILASQVNIQNKIIKLFTVATVA

gene MMPPTLIGTIYGMNFKFMPELELHYAYPIVLAVMIISIIVPVIVFKKKGWL"  
 2396..2938  
 CDS /locus\_tag="DMACINML\_00003"  
 2396..2938  
 /locus\_tag="DMACINML\_00003"  
 /inference="ab initio prediction:Prodigal:2.6"  
 /inference="similar to AA sequence:RefSeq:CAL34862.1"  
 /codon\_start=1  
 /transl\_table=11  
 /product="molybdopterin biosynthesis protein"  
 /protein\_id="Prokka:DMACINML\_00003"  
 /translation="MDIIKIGILTLSDRASSGVYEDKATAEVERTLNSYIKNEIIYFK  
 ELIPDDYDLIIKKLLYLADEKECDLIITSGGTGPALRDVTPATEAVECDKLMPGFGEL  
 MRLESLKFVPTAILSRTAGIRNKSFIINLPGNPKAIACLEPVPFPAIPYCIDLIGGA  
 YIEGNDEVIQVFRPKKKCQN"

gene complement(2935..3120)  
 CDS /locus\_tag="DMACINML\_00004"  
 complement(2935..3120)  
 /locus\_tag="DMACINML\_00004"  
 /inference="ab initio prediction:Prodigal:2.6"  
 /inference="similar to AA sequence:RefSeq:CAL34861.1"  
 /note="hypothetical protein Cj0724"  
 /codon\_start=1  
 /transl\_table=11  
 /product="hypothetical protein"  
 /protein\_id="Prokka:DMACINML\_00004"  
 /translation="MFFKKKVPKQNTRPKIPTNDIILDRLYKFKNKIQISKDEAS  
 VSLLARQLSRLIKANKF"

gene 3250..4437  
 CDS /locus\_tag="DMACINML\_00005"  
 3250..4437  
 /locus\_tag="DMACINML\_00005"  
 /inference="ab initio prediction:Prodigal:2.6"  
 /inference="similar to AA sequence:RefSeq:CAL34860.1"  
 /codon\_start=1  
 /transl\_table=11  
 /product="putative integral membrane zinc-metalloprotease"  
 /protein\_id="Prokka:DMACINML\_00005"  
 /translation="MTLIAILCLYTALLSWISYNQIRFLEKEKDKQAQILSEEDYQNA  
 ADIAIENEKFKLFSNFYTLIVNIAWIGFGFLYLKELISENSRLENTLFLLAFLIITS  
 ILNLPLSIYESFVKDKAHGFSNMTLKLFIKDTIKSLILTLIFGFLILYALLFCYDFFG  
 TFWWFAAFVFAFCVIVIINVIYPTLIAPIFNKMEKLEDENLLSKINDLMKRCGFNANG  
 VYVIDASKRDKRLNAYFGGLFKSKRVVLFDTLLKALSERELLAVLGHELGHFVHKDII  
 KALINGAITMFLFFIFAHLPDFAYLESHLEGVNGGVFALLFIFANIFSFIISPLINA  
 LSRKNEFAADQHGSKLTSKEDMKNALIALARENKAFIKTSKIYTFYLSHPSISDRIK  
 ALS"

gene 4434..5234  
 CDS /locus\_tag="DMACINML\_00006"  
 4434..5234  
 /locus\_tag="DMACINML\_00006"  
 /inference="ab initio prediction:Prodigal:2.6"  
 /inference="similar to AA sequence:RefSeq:CAL34859.1"  
 /codon\_start=1  
 /transl\_table=11

```

/product="putative DNA methylase"
/protein_id="Prokka:DMACINML_00006"
/translation="MTIKNALIEAKSRLEKHENEALFILCEYLKDRTWIFLNQDLEF
DSKPYFELIKRFQSGEPFEYIFEKADFWGLEFKVKKGVLIIPRYDSEILLSQVLKICKN
NNFQNIIEIGFGSILSIVLAKELGIKITACDINPKALQLALENAKLHKVEHLIDFKL
YDFKQIKESYDFIFSPPYIQNSYPIDLWVQNEPKEALFGGEKGYEILEEIIITFSFER
KVKFLACEFGYDQKAILKQILYQKNFQAEFFQDEQGYDRAFVAQFAKK"
gene 5276..5749
/locus_tag="DMACINML_00007"
CDS 5276..5749
/locus_tag="DMACINML_00007"
/inference="ab initio prediction:Prodigal:2.6"
/inference="similar to AA sequence:RefSeq:AON66884.1"
/codon_start=1
/transl_table=11
/product="putative membrane protein"
/protein_id="Prokka:DMACINML_00007"
/translation="MKAINLFLLAAMIGIELILGIVVAPVIFYPANFIGEVLSHFQS
GLMMTQIFIKMGYLLIFVSIFNLLFEIYSFIKEDMKFQIKFSKLILSILILSLVFN
LYFTNTIVELQNLGEQATKSQEFLSIHNASEVVIKIILLMQVFLYFLSFKIAKCC"
gene 5785..6534
/gene="flaC"
/locus_tag="DMACINML_00008"
CDS 5785..6534
/gene="flaC"
/locus_tag="DMACINML_00008"
/inference="ab initio prediction:Prodigal:2.6"
/inference="similar to AA sequence:RefSeq:CAL34857.1"
/codon_start=1
/transl_table=11
/product="flagellin"
/protein_id="Prokka:DMACINML_00008"
/translation="MMISDASMMQQNYLNNNAQKASEKALENIAAVRAISGVDSANLA
IADSLRSQSSTIDQGANAYDAIGVLQIADASLTNISQSADRLNELSVKMNNAALSDS
QKSMRLRTEATRIQESINDSFNNATYNGKNVFQTMNFVVGSGTETTNLNPLATSGLSID
NQDSITSFMDQLGALRSEIGSGINAITSNINASVQNSINAKAAENLLNNDMAKNVND
FNSNYLKENAAAFVAAQSNMQLQSKIASLLQ"
gene 6571..7203
/locus_tag="DMACINML_00009"
CDS 6571..7203
/locus_tag="DMACINML_00009"
/inference="ab initio prediction:Prodigal:2.6"
/inference="similar to AA sequence:RefSeq:AMK27605.1"
/codon_start=1
/transl_table=11
/product="YggS family pyridoxal phosphate enzyme"
/protein_id="Prokka:DMACINML_00009"
/translation="MTLEQILEKTKNIRLVAASKYVDANIIEKLFQAQGITEFGENQVQ
ALIQKKEILDKDLNIKWHFIGTLQSNKINLLIKQKPILWHSCNGLKIAKAMDKRLNY
KLDTLLEINSANELSKSGLNPDQAIIEEYLQIQEECPNLNLGCVMSIGSHSEEQKEIIK
SFEITYKIYEKQLKHGAKICSMGMSNDFEIAIKCGSNMVRLGSILFKNLK"
gene complement(7220..10822)
/gene="dnaE"
/locus_tag="DMACINML_00010"

```

CDS complement(7220..10822)  
 /gene="dnaE"  
 /locus\_tag="DMACINML\_00010"  
 /EC\_number="2.7.7.7"  
 /inference="ab initio prediction:Prodigal:2.6"  
 /inference="similar to AA sequence:RefSeq:CAL34855.1"  
 /codon\_start=1  
 /transl\_table=11  
 /product="DNA polymerase III, alpha chain"  
 /protein\_id="Prokka:DMACINML\_00010"  
 /translation="MSQFTHLHLHTEYSLLDGANKLKEAKTLKEQGATSVAMTDHGN  
 MFGAIDFYQTMRSQGLKPIIGLEAYLHNHEDISDKSSRQRFHLCLYAKNEVGYQNL  
 MYLSSQSYIKGLYYYPRINKKLEEHSEGLICSSACLQGEVNWHLNIHSERNVRF  
 GAKGYEAAKEAALWYKKVFGDDFYFEIMRHGIGDQRAIDDDIIRLSKELNIKI  
 IATNDTHYTFKERAAAHEVFMCIAMGKKLNDPDLRHSVHEFYVKSPAQMSEL  
 FADIPEAIENTQEIANKC�LELNLGNPTPPNFKFTREYAKEYNISLPEEGKEFS  
 FDNDVVDFDELCKKGLEERLKFVDISKHEEYKTRLEVEINIIKKMKFSGYML  
 IVHDFIKVAKDKGIPVGPGRGSAAGSLVAYSLKITDLDPYPYSLFERFLN  
 PERVSMPIDVDVFCQDRRGEVIDYVIDKYGADKVAQVITFGKLLARGVIR  
 DVARVCDMSIPDADELAKLIPEELKITLDAAYEKEPKIKEFIERHPKGPEV  
 WEYAKALEGLNRNAGMHAAGVVISNESLWKKTPLFRQSKNDERHLVTQYS  
 KDHLLEDVLIKDFDLGLKTLTLINNAIKLIKRYNKDIVWEAIDVNDKAVYK  
 TIQSGNTLGFQIESGGMQNLNARLKPERFEDIIVLALYRPGPMESGMLDDF  
 IDRKHGLK KIEYPFDTLESVLEPTYGVIVYQEQVMQIVQIIGGFSLGGAD  
 VVRRAMGKKDPEKMKK LKSEFADGAEKQGYDRVKAELWELIVKFAGYGF  
 NKSHSAAYALITFQTAYLKTYPS EFMAALLTSEENNVDKIAVYIDEMK  
 MNIKLLPPSVNKAIREFSAVEQEDGKDAIVYGLGAIKSVGIPAVENLL  
 LEARERGEFKNIDDFLSRIEPTKINKRTLESLIKAGAFDEFGYTRKCL  
 FDNMDNLTEGSKMADARKNAASSLFGEDELTVGLQVNIVAKDEEFVMEK  
 LEFEKEILGIYVSGHPLDRFYEFKDKIDYIKSIDFSTLKGNGEILSIGKIE  
 SFKSMMSKN NKRYGRLEILDFYSTFEVTVFESNIEEIEINILKNEASR  
 NEAYGFLLSYKAEEGKLDLALRSIKTLEELQEGEVKAVKFKSAKKNAL  
 ENKDFVAEPKEFENNIIELDL SRLNRELVEIHEIARNAHNPNEKGNK  
 KLVLKIVSTGSCLLYHTDFVISDSVSEKIINKYAG"

gene complement(11033..11362)  
 /locus\_tag="DMACINML\_00011"

CDS complement(11033..11362)  
 /locus\_tag="DMACINML\_00011"  
 /inference="ab initio prediction:Prodigal:2.6"  
 /inference="similar to AA sequence:RefSeq:CAL34854.1"  
 /codon\_start=1  
 /transl\_table=11  
 /product="putative ArsC family protein"  
 /protein\_id="Prokka:DMACINML\_00011"  
 /translation="MKVYGIKNCNSVKKALEFLNQKALEFDFIDIKKIDLNILE  
 NWLYKKFSEIINTAGTTSKKLGLNKDKIENLSELELKNIILENPSCIKR  
 PVIERNQIYIGKEYEQIS"

gene complement(11359..12702)  
 /locus\_tag="DMACINML\_00012"

CDS complement(11359..12702)  
 /locus\_tag="DMACINML\_00012"  
 /EC\_number="2.5.1.54"  
 /inference="ab initio prediction:Prodigal:2.6"  
 /inference="similar to AA sequence:RefSeq:CAL34853.1"  
 /codon\_start=1  
 /transl\_table=11  
 /product="putative phospho-2-dehydro-3-deoxyheptonate

aldolase"  
/protein\_id="Prokka:DMACINML\_00012"  
/translation="MTWTKNSWKNFSIKQQPIYSNQEELNKVLNKLEKLPPLVFAGEV  
RELQNALARVCRKEAFLQGGDCAESFANFGAVNIRDMFKILLQMAIVLTFAGGCPVV  
KIGRMAGQFAKPRSSDYEEIDGVKLPYRGDIINGFEFNEKARIPDPNRMLEAYYQSA  
TTLNLLRGFAGGLANLHEVHRWNLGFLKKSELHQYTDISEKISQALDFMEACGINT  
YNTPSLKEVDVYTSHEALLLPYEEALTRVDSLSGEIYDCSAHMLWIGERTRGLDEAHV  
HFLSGVRNPLGVKIGPNASADDVIALANALNPNNEEGRNLNIIIRMGAEKIATQLPKIF  
SKLKK EGLNLVYSIDPMHGNTVKAGDFKTREFDKIMQEVRYFFEIAMSEGVYAGGVHL  
EMTGQDVTECTGGASNVTAQSLEKRYETQCDPRLNADQALELAFLIADLVKKVRK"

gene complement(12727..13140)  
/locus\_tag="DMACINML\_00013"

CDS complement(12727..13140)  
/locus\_tag="DMACINML\_00013"  
/inference="ab initio prediction:Prodigal:2.6"  
/inference="similar to AA sequence:RefSeq:CAL34852.1"  
/codon\_start=1  
/transl\_table=11  
/product="transthyretin-like periplasmic protein"  
/protein\_id="Prokka:DMACINML\_00013"  
/translation="MLSMKILLALISIPFLNAAEYQLSTHILDINSGQPASNVKVE  
LYSLNKNQWIKISEKFTEKNGRISDLLPYEKTENRPSGIYKLFYTKDYMSRKVDS  
FYPFVEVSFELLKDQKHYPITLSPFGYSTYRGS"

sig\_peptide complement(13078..13140)  
/locus\_tag="DMACINML\_00013"  
/inference="ab initio prediction:SignalP:4.1"  
/note="predicted cleavage at residue 21"

gene complement(13293..13649)  
/gene="rplS"  
/locus\_tag="DMACINML\_00014"

CDS complement(13293..13649)  
/gene="rplS"  
/locus\_tag="DMACINML\_00014"  
/inference="ab initio prediction:Prodigal:2.6"  
/inference="similar to AA sequence:RefSeq:CAL34851.1"  
/codon\_start=1  
/transl\_table=11  
/product="50S ribosomal protein L19"  
/protein\_id="Prokka:DMACINML\_00014"  
/translation="MKNKYIEQFEAKQIEGKNVPEFRAGDTLRLAIRIKEGDKTRIQN  
FEGICIARRGNGVDETFIVRKMANNVGVVERIFPIYSESLESITVLRKGRVRRARLFY  
LRDRRGKAARIKELKK"

gene complement(13660..14364)  
/gene="trmD"  
/locus\_tag="DMACINML\_00015"

CDS complement(13660..14364)  
/gene="trmD"  
/locus\_tag="DMACINML\_00015"  
/EC\_number="2.1.1.31"  
/inference="ab initio prediction:Prodigal:2.6"  
/inference="similar to AA sequence:RefSeq:CAL34850.1"  
/codon\_start=1  
/transl\_table=11  
/product="tRNA (guanine-N1)-methyltransferase"

```

/protein_id="Prokka:DMACINML_00015"
/translation="MKFSFVSLFPNLLFVFYFKDSILSRAIQKELFQLDFLNPRDFTDN
IYHKVDDYKIGGGAGLLMQVEPLYNTLKFIKDNEENPYFIFLNP SGKTFNQKDAKRLS
KKQNIVFVCGRYEGIDERVIEIFANEVFSIGDFILTTGGELPALTLCDAIARNINGVLG
NACSL EEESFENGLLEAPSF AKPFIFEQNFKKFYTPSEFLKGNHAKIATLKTTLASCK
TKFFRPDLFLEHERKK"
gene complement(14361..14900)
/locus_tag="DMACINML_00016"
CDS complement(14361..14900)
/locus_tag="DMACINML_00016"
/inference="ab initio prediction:Prodigal:2.6"
/inference="similar to AA sequence:RefSeq:CAL34849.1"
/codon_start=1
/transl_table=11
/product="putative 16S rRNA processing protein"
/protein_id="Prokka:DMACINML_00016"
/translation="MSERNFIQVAKLGKTVGLKGYLKLKLYNLSDFIQQFKKGASFFTEN
GKSQ LKIKHYLANSSVLFEGYENVEAAKQLINLILYQSIEATRQTCILKKDEFFYFD
ILKCEVFD DERRLGKVVDILEVGDSYLF EIQSDQELIDKAYAKTFFIPYIDKYV NKID
IEKYSIFCTKDAFLILENS"
gene complement(14893..15135)
/locus_tag="DMACINML_00017"
CDS complement(14893..15135)
/locus_tag="DMACINML_00017"
/inference="ab initio prediction:Prodigal:2.6"
/inference="similar to AA sequence:RefSeq:CAL34848.1"
/note="hypothetical protein Cj0711"
/codon_start=1
/transl_table=11
/product="hypothetical protein"
/protein_id="Prokka:DMACINML_00017"
/translation="MVENFLREYAKLIADYDPDKITTEKIKLDENFAEII LYADKVD TG
K LIGKNGKMINAIKT VVSACKSKDSMSYRVTVKALE"
gene complement(15140..15367)
/locus_tag="DMACINML_00018"
CDS complement(15140..15367)
/locus_tag="DMACINML_00018"
/inference="ab initio prediction:Prodigal:2.6"
/inference="similar to AA sequence:RefSeq:CAL34847.1"
/codon_start=1
/transl_table=11
/product="30S ribosomal protein S16"
/protein_id="Prokka:DMACINML_00018"
/translation="MTVIRL TRMGRTKRPFYRIVVTDSRKR RDGGWIESIGYYNPMVE
PEVVKFDSERLAYWKS VGAKLSDKVASITSK"
gene complement(15435..16772)
/locus_tag="DMACINML_00019"
CDS complement(15435..16772)
/locus_tag="DMACINML_00019"

```

```

/locus_tag="DMACINML_00019"
/inference="ab initio prediction:Prodigal:2.6"
/inference="similar to AA sequence:RefSeq:CAL34846.1"
/codon_start=1
/transl_table=11
/product="signal recognition particle protein"
/protein_id="Prokka:DMACINML_00019"
/translation="MFELVSESFKSAINKLRFVDDEKALKKNALDTLKKALLKADVHHK
VVKDLLSLIEEDVKKNGIGQKQFLEAIKANLENILNGDGKNQGFVFATKPPTVVLVVG
LQGGGKTTSTVKLANYLKLNRKVKLIAACDLQRLAAVEQLKQLCEANELELFYIENEK
DPIKVAKQALEKAKNSMADVLLVDTAGRLAIDEALMNELKAVKDTLNPDEIFYVADAM
SGQDGVKTASSFNELLQITGVILSKFDADTKGGIALGITKQIGIPLRFVGVGEKIADL
EIFIPERIVNRIMGEGDLATLAEKTATIIDEKEAKLNQKIKKGEFNFDFLTQMESV
KKLGSMKSIIGMIPGLSNVASSVKDLDLDNSKEIIHIKAMISSMTLKERENPDLLNNA
RKRRIAEGAGLSQVEVNRFLKQFANAACLAKRFSGKKGMDSLMQMMNQARRQF"
gene complement(16839..17591)
CDS /locus_tag="DMACINML_00020"
complement(16839..17591)
/locus_tag="DMACINML_00020"
/EC_number="4.2.1.70"
/inference="ab initio prediction:Prodigal:2.6"
/inference="similar to AA sequence:RefSeq:CAL34845.1"
/codon_start=1
/transl_table=11
/product="putative ribosomal pseudouridine synthase"
/protein_id="Prokka:DMACINML_00020"
/translation="MQEKAYKLLALQENISNREAKDLIDKGCVFVSHGKKVVVARALMS
DKTKFSIVKTSKPKVIFEDENIIAINKPYAYISEELEKFFNAKLLNRLDKETSGVILL
CKNEDFRKICIEEFKQRVHKGYIAVLGILAEVEINEPILTIKTKNGALSKISKEG
LSAVSIFTPIMMQAKKTLAKIIIKTGRTHQIRVHAKFIKHGIIGDEKYAKISSDRMYL
HSYEIRILNYQFKAELDPSFAKLGFEIKNLDF"
gene complement(17572..18729)
/locus_tag="DMACINML_00021"
/locus_tag="DMACINML_00021"
/EC_number="4.2.1.70"
/inference="ab initio prediction:Prodigal:2.6"
/inference="similar to AA sequence:RefSeq:CAL34844.1"
/codon_start=1
/transl_table=11
/product="3-deoxy-D-manno-octulosonic-acid transferase"
/protein_id="Prokka:DMACINML_00021"
/translation="MIFLYYILVWIAFLLCAIPLFLLSLFKPKYKNSLKARFFLFRNI
SQKRSDVHFHVCSYGEAKSIKELVLKFDSRITTITQTGYDYAKEICNKVNYLAFENWI
PFWLKPVKLVIFEAEYWLMFVFIKQKSKVILLNARISDNSYASYKKFRFFYKIF
CYIDEVFAQSEADKIRLEDLGAKNVKIFPNIKSKLQICPAQKYFKPKQLIIFASTHK
GEEELLLKHKMDKQEKLIAPRHPERFLEVEQLLHDKGLKFDKFSLLQNEKDKFNQD
ILLDCLGELINFYAISDVVVLGGSFEGIGGHNPPIEVAHFNNVLISGVYIHNQKSLF
QEVDNVYFCEDLKELDGIIHNYNLKAKIAQNNDLSTIIQAIQEGIDARKSI"
gene complement(18726..19442)
CDS /locus_tag="DMACINML_00022"
complement(18726..19442)
/locus_tag="DMACINML_00022"

```

```

/inference="ab initio prediction:Prodigal:2.6"
/inference="similar to AA sequence:RefSeq:CAL34843.1"
/note="conserved hypothetical protein Cj0706"
/codon_start=1
/transl_table=11
/product="hypothetical protein"
/protein_id="Prokka:DMACINML_00022"
/translation="MNKYLEQLVLLSKIDQEIDSFEPKMESISKTLKDAENKIAKFNV
ELNNLENIQDVENQKVQNNAHISEFSAKIKELSKKSGAVKTEKEANALKIEEDIAKE
QLDAADEIVRLDKILENKELFKKELLEERAKEEQNLDEIRVSISSQMDGLEKERMNV
YAKKTKLVAEMNQVLSFYEKIRKWKANTAVVPVKQACYGCFMKIYDKTYLSVIKGE
EIITCPHCGRILYKEQEDQN"
gene complement(19452..20177)
/locus_tag="DMACINML_00023"
CDS complement(19452..20177)
/locus_tag="DMACINML_00023"
/inference="ab initio prediction:Prodigal:2.6"
/inference="similar to AA sequence:RefSeq:CAL34842.1"
/note="conserved hypothetical protein Cj0705"
/codon_start=1
/transl_table=11
/product="hypothetical protein"
/protein_id="Prokka:DMACINML_00023"
/translation="MKLIEIYNFLDKLSPFETQEIWDNSGLLLGNFDDEIHNVYLSLD
IDEQLIQNAEENSLFITHHPLIFKGLKDLANSAYPRAFIKEMLRKNLSLISMHTNFDL
SHLNTYFIEEILGFEISFKDKFLAYVDVDMTFKELCTLVKKRNLNLEILRTSFCGKEHL
KRLAVCTGSGDDLNEVKADCYLSGDFKYHQALEAISNHLNLDLGHFESERYFAQCL
VKHLKNLPLKVIIITVSKNPFQYF"
gene complement(20164..21027)
/locus_tag="DMACINML_00024"
/EC_number="6.1.1.14"
/EC_number="6.1.1.14"
/EC_number="6.1.1.14"
/inference="ab initio prediction:Prodigal:2.6"
/inference="similar to AA sequence:RefSeq:CAL34841.1"
/note="conserved hypothetical protein Cj0704"
/codon_start=1
/transl_table=11
/product="glycyl-tRNA synthetase alpha chain"
/protein_id="Prokka:DMACINML_00024"
/translation="MTFSQMILNLQEFWQKQGCAIMQPYDMPAGAGTFHPATFLRSLG
KKPWATAYVAPSRPTDGRYGENPNRLGAYYQFQVLMKPSDNIQELYLKSLENLGF
LKSHDVRFEVDNWESPSLGAWGLGWEVWLDGMEVTQFTYFQQVGGIAVDLVS
AETIYGLERIAMYLQNVDNVYDIVWSEFNGEKIKYADVHKRSEYEF
SKYNFEISNVDFLNQQFENTYKECKSILEQGLALPAYDYCMLAHTFNLLDARGAISVAQRQDYMLKIRELSKTCA
EIYKKNLDETD"
gene complement(21029..21583)
/locus_tag="DMACINML_00025"
CDS complement(21029..21583)
/locus_tag="DMACINML_00025"
/inference="ab initio prediction:Prodigal:2.6"
/inference="similar to AA sequence:RefSeq:CAL34840.1"
/note="hypothetical protein Cj0703"

```



```

/codon_start=1
/transl_table=11
/product="hypothetical protein"
/protein_id="Prokka:DMACINML_00025"
/translation="MQTYLELQEFCKLVHLNEDVVKGMMANGALNFKEEEGKIYIEAN
QGTFSVPSASNSKPAMVNSMTLAGESFVEKTIGTILNLHEKVLDKDETLDALKNEN
KFLKDALYSMQELYDEDKRTIETLNHELKHAREEIEFLKRKYKLMWSKTAEIFGARTE
PDLEMKKDENSSTTNEKLNENKEG"
gene complement(21594..22088)
/gene="purE"
/locus_tag="DMACINML_00026"
CDS complement(21594..22088)
/gene="purE"
/locus_tag="DMACINML_00026"
/EC_number="4.1.1.21"
/inference="ab initio prediction:Prodigal:2.6"
/inference="similar to AA sequence:RefSeq:CAL34839.1"
/codon_start=1
/transl_table=11
/product="phosphoribosylaminoimidazole carboxylase
catalytic subunit"
/protein_id="Prokka:DMACINML_00026"
/translation="MKFVSIVMGSKSDYEIMSECAKTLEKFGVKYELIISSAHRSPKR
TKEYIKEAETKGAKVFAAAGMAAHLGAVAAYTTKPVLGVPMPGSALASMDSL FSTV
QMPGGIPVGT LAVGKAGAKNAAYLAMQILALNDEALAEALKQDRKNQEENLISDSKSV
EVL"
gene complement(22085..23341)
/locus_tag="DMACINML_00027"
CDS complement(22085..23341)
/locus_tag="DMACINML_00027"
/inference="ab initio prediction:Prodigal:2.6"
/inference="similar to AA sequence:RefSeq:CAL34838.1"
/codon_start=1
/transl_table=11
/product="putative protease"
/protein_id="Prokka:DMACINML_00027"
/translation="MIIPEIVAPAGNFTKLKIALAYGADAVYAGVNNFSLRSRTAREF
NYESFEEAIKYTHQRGKKVYVTLNGFHLGGQIESLKKHILKLEKMPDAFIVASVGAM
ALVRELAPEIALHVSTQANVLNLYLDARVYKDMGAKRVVIARELGLKDAKSLKENDIE
LEAFVHGSMCFAYSGRCLISSVQSGRMSNRGSCANDCRFNYELYAKNPENGVLFRL EE
DENGTHVFNSKDLNLCSYIEKIMQEDCISAFKIEGRTKSEYYVALTTRTYKMAIQDAL
EGKFEASKYEKEIATLKNRGFTDGYLVSRPLEKADTQNHDTSEEGTHQVHAIVEDGE
YFKCKGKIVLNKAYEILMPLGDKIESCDNELGKIYKTEDKYFVEFKLISKNNKEFNE
IHSGNENEIKMPNKISSFSFLRKEIG"
gene complement(23338..24039)
/locus_tag="DMACINML_00028"
CDS complement(23338..24039)
/locus_tag="DMACINML_00028"
/inference="ab initio prediction:Prodigal:2.6"
/inference="similar to AA sequence:RefSeq:CAL34837.1"
/note="hypothetical protein Cj0700"
/codon_start=1
/transl_table=11
/product="hypothetical protein"

```

```

/protein_id="Prokka:DMACINML_00028"
/translation="MTQEELDALMNGDVNFDEDAESNNKSETESHLESEEGLMLEDVK
VSDYKPDPSVWPPPPPNQEHKVVHQLDDVTKDSELKATEMMDKLESINSFFADSESL
FSEIDKALSKNIEIFSKLNEKFPNVVSFNEALQLNSKVKKASQEIIDKLQCGQDEVM
AMDAMQYQDIHRQKIERVINVMRALSRYMSSLFEGRIDDKRVSSAVHIEGDSTTDIV
SNDDIEALIASLGQK"
gene 24238..25668
      /gene="glnA"
CDS   /locus_tag="DMACINML_00029"
      24238..25668
      /gene="glnA"
      /locus_tag="DMACINML_00029"
      /EC_number="6.3.1.2"
      /inference="ab initio prediction:Prodigal:2.6"
      /inference="similar to AA sequence:RefSeq:CAL34836.1"
      /codon_start=1
      /transl_table=11
      /product="glutamine synthetase"
      /protein_id="Prokka:DMACINML_00029"
      /translation="MGKFNNDVEFFNFCKQNEVLFVDFRFTDMIGTWHHITYNLHAI
SEETFAGIPFDGSSIHGWQPIEKSDMILKPDAQSAFLDPFTADPTVIVFCDVYDIYK
GQMYEKCPRSIAKKAMEHLKNSGIADTAYFGPENEFVFDVSVKIVDTTHCSKYEVDTE
EGEWDDKDFADSNTGHRPRNKGGYFPVQPIDSLVDIRSEMVQTLKVGKTFVHHH
EVAQGQAEIGVNFGLVEAADNVQIYKYIVKMAHLNGKTATFMPKPLYGDNGNGMHV
HMSLWKDGVNLFYDKEGYGGLSQTAINYIGGVLKNARSVAaftNPSSNSYKRIVPGFE
APCILTYSCQNRASCRVPYIGKNSARVEIRFPDSTANPYLAFVSLLMAGLDGIKNK
TIPVGPMDENLFDLTLDEIREKGIEQLPHTLRGSLEALIRYNAFLKPVMSDIFIDYQ
HLKFETQVWPVEARPTAYEFKTCYSC"
gene complement(26038..26829)
      /gene="flgG"
CDS   /locus_tag="DMACINML_00030"
      complement(26038..26829)
      /gene="flgG"
      /locus_tag="DMACINML_00030"
      /inference="ab initio prediction:Prodigal:2.6"
      /inference="similar to AA sequence:RefSeq:CAL34835.1"
      /codon_start=1
      /transl_table=11
      /product="flagellar basal-body rod protein"
      /protein_id="Prokka:DMACINML_00030"
      /translation="MMSLHTAATGMVAQQTQIDVTSNNIANVNTAGFKKGRAEFADL
MYQVMKYAGTSTSATLSPSGIEVGIGVRPTAVTKVFTEGNLTKATSTDGLDMAIAGNG
FFQIQLPDGTIAYTRNGQFTKDNEGNIVNADGYRLLPEMTIPEGATAINVATDGTVSV
MLPGEQQETQIGQVELVQFINPAGLHSMGDNLYLETGASGAPVAGIATQDGLGTIRHG
FIELSNVQLVEEMTDLITGQRAYEAGSKAITTSDDMLGIVNQLKR"
gene complement(26860..27672)
      /gene="flgG2"
CDS   /locus_tag="DMACINML_00031"
      complement(26860..27672)
      /gene="flgG2"
      /locus_tag="DMACINML_00031"
      /inference="ab initio prediction:Prodigal:2.6"
      /inference="similar to AA sequence:RefSeq:CAL34834.1"
      /codon_start=1

```

```

/transl_table=11
/product="flagellar basal-body rod protein"
/protein_id="Prokka:DMACINML_00031"
/translation="MQNGYYQATGGMVTQFNKLDVITNNLANINTSGYKRDDVVIADF
KRIFKETQDELPIENHTRDASRFVNTTIDGVPQVSQGYTDFSLGSLKATNNPLDLAMT
REDAFYLVQTKDGEIRLSKDGNFQLNEEGYLVNKQGYRILSSDYFNPNQAGIRIPNG
AVYINVDRNGSIEVDGVQNARLFIAQVDDIRALQKDGDNVYRIDDLTRIRDLDNSNAV
RQGFSGSNVNPVTEMVGLIEANRMVEMYQKVMTAHMDDLNQEAINKLAAVK"
gene complement(27813..28925)
/locus_tag="DMACINML_00032"
CDS complement(27813..28925)
/locus_tag="DMACINML_00032"
/inference="ab initio prediction:Prodigal:2.6"
/inference="similar to AA sequence:RefSeq:CAL34833.1"
/codon_start=1
/transl_table=11
/product="cell division protein FfsZ"
/protein_id="Prokka:DMACINML_00032"
/translation="MSEFLVEEMQHNGKAKIKVIGCGGGGNMINHMVKMGLNDLDLI
AANTDAQAISNSLAKTKIQLGEKTKGLGAGMLPEVGAESARESFEI IKASLSQSDIV
FIASGFGGGTGTGATPVIAQAAKEIGALT VSVVTPFAFEGKQRKLAENGLLELKKE
SDSILVIQNEKLLSIIDKKAGIKDAFKLVDDILARAVKGMVSILLDNGDINVDFAVDR
TIMSHRGLALMGVGSASGENAIEEALSNAIESPLLDGMDIKGAKGVILHFKTSSNCSL
IEISAAANNIEEIVDENAKIIFGSTTDDSMEDRVEVTIIATGFEDRDSMAKKAEEAE
APKKNPYLNLRKVSGGFDEEIMAQIETPTFLRRQMD"
gene complement(28942..30324)
/locus_tag="DMACINML_00033"
CDS complement(28942..30324)
/locus_tag="DMACINML_00033"
/inference="ab initio prediction:Prodigal:2.6"
/inference="similar to AA sequence:RefSeq:CAL34832.1"
/codon_start=1
/transl_table=11
/product="cell division protein FtsA"
/protein_id="Prokka:DMACINML_00033"
/translation="MNILGIDLGSTQTCAIVAQKDEEGLKIIIGFAKAKTNGVKKGAIT
NIELASKSIEEAVRNAEMMSGVHYDKVVVVISGAYTKSVDSIGVVNIPNHEIGIKEIH
RAVSTAKHTANLPSGYEIIHVL PYNFKVNDLEHVDDPLGMSGNRLEVSTHIVISQESH
IKNLKKAVELADLRVDNIVLSGYASAIACLDDSEKELGAVLIDMGGAI CDMMVHTGNS
IRYNDCLQIGSINITQDLSMALHTPLKEAEKIKLNYAALSQQPNALI QIPSMGDERKV
NEVSLDIISNVIYARAEETLMILAKILSDNRYANSIGGGVLTGGMTKLAGIDELAPA
TFDNRSVRLATARKDLITGFSEIFNDPENTCAIGLCLYGAGYFTPYELDSNEKLRYKG
EIENYNRQIRQEIIIPQKEVENETKSDFFGENLQENDTIILQEQLDFKEPKEKPNVFS
NIWHKIMNQF"
gene complement(30327..31814)
/locus_tag="DMACINML_00034"
CDS complement(30327..31814)
/locus_tag="DMACINML_00034"
/inference="ab initio prediction:Prodigal:2.6"
/inference="similar to AA sequence:RefSeq:CAL34831.1"

```

```

/codon_start=1
/transl_table=11
/product="putative periplasmic protein"
/protein_id="Prokka:DMACINML_00034"
/translation="MLTWMQHKKYLVITIWISTIAFVGAGFLGWGAYDFNLNRSSSV
AVVGDEKINYNEFNVRYNQIFNYYNQISNGGLNEESAKQLGIENAALSSLVEDKLLLN
FAKDLGLGSSENEVIQALAETRAFQDPSGDFNKTIYYELLNANNMTPKEYEKTLSNEI
IIGKLEQIFNLPQTDEELKMLGASYFMQDSLNIAKLEQDKENIQVNEEELKKLWNEHK
EDYKTKKIYEISTYYLPVDMQKIDDSKLEEFYNNENNKFYKDFSGKIMSF EAAKKDV
AKDYALAQLKNTANAKFLELKEGKDNFQKDENITDSVYYPLEALSRAKNGDVL RPSE
YQNGYIIKLNKTNPIRTKTFDEAREELMPIYISEQVKKNLEEKAKQNLNENFSGTNIG
FVSRDTRNDAKISNILNEAEFSYFLMNVFNSDQNRSYVILNEDKAILYKINKQLDM
NPEKFQQYRTMLNQLNLKANEMKQELIEELKKTYPKIYYK GK"
gene 31967..32902
      /gene="mraw"
CDS   /locus_tag="DMACINML_00035"
      31967..32902
      /gene="mraw"
      /locus_tag="DMACINML_00035"
      /EC_number="2.1.1.-"
      /inference="ab initio prediction:Prodigal:2.6"
      /inference="similar to AA sequence:RefSeq:CAL34830.1"
      /codon_start=1
      /transl_table=11
      /product="S-adenosyl-methyltransferase"
      /protein_id="Prokka:DMACINML_00035"
      /translation="MKIPHIPVLLNEVNQAFKKLD SGYFLDCTVGFGGHSESLKKNHP
NLKLIACDQDKEALEFSKRLHDFQDRTEFVLSNFSQILDQISHDKLNDLKGILADIG
VSSYQLDDNKRGNLHSDFLDMRMNQDAKNSAFDIINNYTQEQLSDIFKKYGELNNGY
FIAQKICQERQKNKIKSAKELYEIIIGTKQNRKISKATLVFQAIRIEVNQELEVLKT
FLEKLEKIKLKNCILAIICFHSLED RIVKNYFKKWAKNCICDERAFKCECGNNHALGQ
IISKKAIVPSKEEIMINSRSSCAKMRIHFHKNMDK"
gene 32902..33792
      /locus_tag="DMACINML_00036"
CDS   32902..33792
      /locus_tag="DMACINML_00036"
      /inference="ab initio prediction:Prodigal:2.6"
      /inference="similar to AA sequence:RefSeq:AJK70823.1"
      /codon_start=1
      /transl_table=11
      /product="membrane protein"
      /protein_id="Prokka:DMACINML_00036"
      /translation="MLDDDFLKEKQIRQKMLKFSRAVNQ GKPLDDDLKKEISSDDIL
RRRFKRSNRF LDEVEEY ELEYTKKSNIY LKEDLINVKLEEKQSLAKKIFSKIKEKN
KNQEPKNKTKKLF SFLKKKEIQTIQNKTTHNNTQEKYLHTDKQTEIKKLQNDKIQPT
QTDLKPDIRQSL ENLQKKIQTEIKAEIEKPEIQPIKTEYDEDAQKVKNVLL EGF SNA
TKEDKNLNFNHL LFAVLVFSFTLVLFAPQIYIRNQIYYLSREIATLRVEESVLDEENK
DLKRRLEIMRFQNQILDYLE"
gene complement(33780..34271)
      /locus_tag="DMACINML_00037"
CDS   complement(33780..34271)
      /locus_tag="DMACINML_00037"
      /inference="ab initio prediction:Prodigal:2.6"
      /inference="similar to AA sequence:RefSeq:APA80970.1"

```

```

/codon_start=1
/transl_table=11
/product="membrane protein"
/protein_id="Prokka:DMACINML_00037"
/translation="MKKFKDFSCNFLFKISDQPVLLRDLLLEANALFNDGMLVDPSKLN
FNFKILNSYIYFGIFCALILLPLLLLITHYLFTRLDFHISIIISAVAVTACVFISYDIFK
VYARKMISKKLIQKAWALHFPYFAYEKYSIMAGNFYKEALKEEIPKANLEQYVLEKII
HSK"
gene      complement(34346..35536)
          /locus_tag="DMACINML_00038"
CDS       complement(34346..35536)
          /locus_tag="DMACINML_00038"
          /inference="ab initio prediction:Prodigal:2.6"
          /inference="similar to AA sequence:RefSeq:AJK70820.1"
          /codon_start=1
          /transl_table=11
          /product="acetate kinase"
          /protein_id="Prokka:DMACINML_00038"
          /translation="MKILVLNSGSSSIKFKFFDDKVVKASGLVEKIGEEKSKVILKNA
LNDEKFERELPIKNHEHGLQIVNELFKESGILEDLNALDGCGRHIVHGRNLSEHCLV
DDYVLKEIDRVSIFAPLHNPAGIKTMMKAAPNVKNTVIFDTAFHRTMPDFAYMYA
LPYDFYDKHNIRRYGFHGTSHAFVSARAACLKLGKDKEDLNAISAHLGNGASVCAIEGG
KSIDTSMGFTPLEGLVMGTRCGDLDPAILPFISNLKGLTIEEIDTLLNKKSGLYGICG
SNDFRDIGTKIEQGDDRARLAFDMFCYRLKLYIGAYFTVLPRTDAIIFTGGIGENAAS
VRQKVCERLSHLGVELDIGLNNEKSSCERMISTANSKVKIFIPTDEELEIARITEEL
INKS"
gene      complement(35550..37052)
          /gene="pta"
          /locus_tag="DMACINML_00039"
CDS       complement(35550..37052)
          /gene="pta"
          /locus_tag="DMACINML_00039"
          /EC_number="2.3.1.8"
          /inference="ab initio prediction:Prodigal:2.6"
          /inference="similar to AA sequence:RefSeq:EAQ72368.2"
          /codon_start=1
          /transl_table=11
          /product="phosphate acetyltransferase"
          /protein_id="Prokka:DMACINML_00039"
          /translation="MANLYLMRSRSDELNTLITTKLLKNYSKIYKNIAIYCPVIYVHR
IPVLQGWLEEFDIKQTLKNAYSFTFREAMEEFSKDPHSFFNTILEEYEEELNRKYDFVL
VNSFCEFGILDGFDLSIKLAKNLNTPIAAIINDEDKLIQKYFDEALDGKDYALINEN
FNFEVHKLQAYDFMTPHRFKYELIKKSVKNKKTVVLPESNDERILKAVEILLKSSVV
DLILLGDEQDIKQKADELALDLTAVKILNPLNSEYNEEFATLLYEARKSKGMSLEEAK
ELVKDRTYFGTLLIHSGKADAMVSGASTTTAETIRPALQIIKTQEGVDSVSGIFFMGL
DDKVLAFADCAVNPNAEQLATSAYVSAMTAKSFGIEPRIALLSYSSGDSGKGESVD
LVKEALKIAKEKYPELNIDGPMQFDCAYPDPKTAAKMPNSKIAGNVNVVYFPDLDAAN
ICYKAVQRTANALAI GPILQGLKPVNDLSRGCLVDDIVDTVILSAIQAQ"
gene      37157..37855
          /gene="flgH"
          /locus_tag="DMACINML_00040"
CDS       37157..37855
          /gene="flgH"
          /locus_tag="DMACINML_00040"

```

```

/inference="ab initio prediction:Prodigal:2.6"
/inference="similar to AA sequence:RefSeq:CAL34824.1"
/codon_start=1
/transl_table=11
/product="putative flagellar L-ring protein precursor"
/protein_id="Prokka:DMACINML_00040"
/translation="MKKVLFYVLPFAFFGCSATVDPQISMKPPAYVEELAPKQSNNVE
TAPGSLFGKGDNPLFSDKKAMNVNDLVTVVIQESTTQSTQANKATSRTNTSNLGGGAL
TGGSGLLGTAIDKVNAYSNIGFQTNSTNNYQGTGAQSRNESFNTTISTRVIKILSNGN
YFIEGSRELLINGEKQIIQLSGVIRPYDIGQDNTIDSRVIADAKILYKTEGEVDRSTR
KPWGSKVIEAIWPF"
gene complement(37939..39012)
/gene="ispG"
/locus_tag="DMACINML_00041"
CDS complement(37939..39012)
/gene="ispG"
/locus_tag="DMACINML_00041"
/EC_number="1.17.7.1"
/inference="ab initio prediction:Prodigal:2.6"
/inference="similar to AA sequence:RefSeq:CAL34823.1"
/codon_start=1
/transl_table=11
/product="4-hydroxy-3-methylbut-2-en-1-yl diphosphate
synthase"
/protein_id="Prokka:DMACINML_00041"
/translation="MEYKRFKTRQIKVGDVLIIGGDAPISVQSMLFTKTRDIEGSLEQL
NRLYFAGANIVRLACLDMADARALKEIKAKSPLPLIVDIHFHNLAVFCAEFIDGVRI
NPGNIGSKENIKEVVKACKERGIPIRIGVNHGSIEKEFSDKYGYGVDAMLESALYNIK
LLEDLDFDIKISMKTSDTQKTIEAYERLRPLCDYPFHLGVTEAGTKFHSTIKSSIAL
GNLLKIGIGDTMRVSMTGELEEEIKVARAILQDSGVQKSGVNIISCPCTCGRIQSDLIS
AIKIVEEKTKHIKEPLNISVMGCVVNALGEAKGADVIAIFGKNQGLVIRHGEVVAKLK
ENELVDRFLAEVEDEVKSREIKE"
gene complement(39071..40909)
/gene="priA"
/locus_tag="DMACINML_00042"
CDS complement(39071..40909)
/gene="priA"
/locus_tag="DMACINML_00042"
/EC_number="3.6.1.-"
/inference="ab initio prediction:Prodigal:2.6"
/inference="similar to AA sequence:RefSeq:CAL34821.1"
/codon_start=1
/transl_table=11
/product="putative primosomal protein N'"
/protein_id="Prokka:DMACINML_00042"
/translation="MRYVELAVFGLYLQNLIFHSEEEIPALREVIIDLKNNKNNLRALV
LKECQKPEFQTKIKEITPFLSCVQFELAKFISYYYSKLGFLGLFSTHQTACDP
VKIENEPKLSQKQKEALEFVKTNPTSLLFADTGSKGTEIYICLIKQYLEQKQVLLLM
PEISLTPQMQRLEVYFKDKFFLWHSKISKKKKQENLERFCKGEALLVAGARSALFLP
FVNALVIVDEEHDNSYKASNQPYINARDLALFLSSKFDIKVLLGSATPSLTSFYKQK
SFRLKGTFFESKKHFLYDESELGITPMLLGLKKSLENQKQAIIFLPTKANFRQIVCK
DCGQTIKCPFCSIAMSLHKKRNVLKCHYCNYTSLIEQNCPCSQGAMLEARKMGTAELQ
ELLQEALPLARIAKFDSEITSIRKLNAILKDFNENNIDILIGTSMKAGHDYHSVDL
SVILGLDEYLF RPNFKASEETLALAMQVAGRGRKGEGRVLLQTKNRNFERYIEDYD

```

SFLQDELENRKDLYPPFKRLLRIVIEDKEQKQAQNLCKKLVDQISHILKVEIIGYGAC  
 SIEMKGGQYRFYILLRSDFYKALIKIQEYALNFKNVSVDIDPIDFL"

gene complement(40906..41352)  
 /locus\_tag="DMACINML\_00043"

CDS complement(40906..41352)  
 /locus\_tag="DMACINML\_00043"  
 /inference="ab initio prediction:Prodigal:2.6"  
 /inference="similar to AA sequence:RefSeq:CAL34820.1"  
 /codon\_start=1  
 /transl\_table=11  
 /product="putative periplasmic protein"  
 /protein\_id="Prokka:DMACINML\_00043"  
 /translation="MKKAFTLLELIFVILILGILASLSFSFANQNKNNAKLLKIDY  
 EMLNSALALMRTQVELKQISAFSPNLDEAKINTQKEKLFYCQAGQNCTYSLLHTPIYS  
 NLNAWMKIAPNRYRFFLNAKEWVDFYNAADFALILECLSEKYCKELL"

gene complement(41349..41594)  
 /locus\_tag="DMACINML\_00044"

CDS complement(41349..41594)  
 /locus\_tag="DMACINML\_00044"  
 /inference="ab initio prediction:Prodigal:2.6"  
 /inference="similar to AA sequence:RefSeq:CAL34819.1"  
 /note="hypothetical protein Cj0682"  
 /codon\_start=1  
 /transl\_table=11  
 /product="hypothetical protein"  
 /protein\_id="Prokka:DMACINML\_00044"  
 /translation="MASDNLKQVIINVSADKDFIVKCSGEGFANFLEDDIALISGGTKKI  
 ELKRFVDAFVKKSYENYILERELKLIKAINIPELVPK"

gene complement(41584..41814)  
 /locus\_tag="DMACINML\_00045"

CDS complement(41584..41814)  
 /locus\_tag="DMACINML\_00045"  
 /inference="ab initio prediction:Prodigal:2.6"  
 /inference="similar to AA sequence:RefSeq:CAL34818.1"  
 /note="hypothetical protein Cj0681"  
 /codon\_start=1  
 /transl\_table=11  
 /product="hypothetical protein"  
 /protein\_id="Prokka:DMACINML\_00045"  
 /translation="MFDEKIINTMSDKVNELIEKYNEVCEANENLRNELVSVKAQNEA  
 KSNQIMRLEEELKSRNIESEDIFKKIEAVLGK"

gene 41969..43942  
 /gene="uvrB"

CDS 41969..43942  
 /gene="uvrB"  
 /locus\_tag="DMACINML\_00046"  
 /inference="ab initio prediction:Prodigal:2.6"  
 /inference="similar to AA sequence:RefSeq:CAL34817.1"  
 /codon\_start=1  
 /transl\_table=11  
 /product="excinuclease ABC subunit B"  
 /protein\_id="Prokka:DMACINML\_00046"  
 /translation="MLELTSDFKPSDQKQAIQKIVKSIKKGKQYQTLGLVGTGSGKTF

TMANVIKELNMPTLIMSHNKS LCAQLYSEFKGFFSNNHVEYFISYYDYQPEAYIPRT  
DVFIEKDSSTNEDLERLRLSATASLLSYEDVVCIASVSANYGLGNPNEYIGMVLIFEL  
GMQISQKELLKKLVDMGYKRNDNFDRADFRVQGDIIIDIYPAYEDEVVRLFFGDEL  
DAMYHYNVLENKKGKDLKRFILYPTSQFSVGETRLKQAIKDIKIELNERLAQFEHENK  
LVEYQRLKQRVEFDLEMLTSTGMCKGVENYARHLTGLKEGDTPTYTLFDYFAIKNRKFL  
VIVDESHVSLPQFRGMFAGDRSRKQTLVDYGFRLPSALDNRPLMFDEFIHKDCQFLV  
SATPAPLELELSKENIFHQIMRPTGLLDPLIELKSDNQVEILFDEAKKVIQRNERVL  
VTVLTKKLAEELETRYYLELGIKVKYMHSDIDAIERNEIIRGLRSGAFDMLIGINLLRE  
GLDLPEVSLIAIMDADKEGFLRSTTSLIQTMGRAARNVNGKVLFFCKKITKSMQEAMD  
TTNERRKLQEAYNQKHNIPTSVKRHIEESLKNEENLGEIYRKGGKFEKMPANERAKI  
IKELRKQMLEAAKALEFEKAAALRDEINKLKDL"

gene complement(43977..45563)  
/gene="dcuB"  
/locus\_tag="DMACINML\_00047"

CDS complement(43977..45563)  
/gene="dcuB"  
/locus\_tag="DMACINML\_00047"  
/inference="ab initio prediction:Prodigal:2.6"  
/inference="similar to AA sequence:RefSeq:CAL34811.1"  
/codon\_start=1  
/transl\_table=11  
/product="anaerobic C4-dicarboxylate transporter"  
/protein\_id="Prokka:DMACINML\_00047"  
/translation="MDFLTSLDESIQFLIQUIIIVL ICLFYGAKKGGIALGLLGGIGIL  
MLVFAFH IKPGKPAIDVMLTILAVVVASATLQASGGLDVMLQIAERVLRRNP KFLTIL  
APFVTCFLTILCGTGHVVYTIPIIYDIAIKNGIRPERPMAAASISSQMGIASPVS  
AVVSLTALLNAEHKLAGFDGYINLLQITIPSTLFGVLCVGFISWFRGKDLKDEVFQ  
EKLDPEFKKYVYGDSKTL LGVQLPKSNWIAMWIFLGAIALVALIGAFDSLKPNWGQK  
MAYKAEINGTTLQWTPSGLNKGVDLQKLGFDQTSIVEENGDKSSKFKEAINS GEIIA  
IPQKDKLGNPSYDFISMVNVIQMFMLLAGALIIIFTKTDAKKIGSNEIFKSGMIALVA  
VFGISWMADTMFAVHTPMMKKAL EDVVTDYPWTYAIMLLLISKFVNSQAAAIAAFVPL  
ALGIGVEPGIIVAFAAACYGYILPTYPSDLATMQFDRSGTTHIGK FVINHSFILPGL  
IGVISSCVAGYFLALIAGYL"

gene complement(45748..46998)  
/gene="rpoN"  
/locus\_tag="DMACINML\_00048"

CDS complement(45748..46998)  
/gene="rpoN"  
/locus\_tag="DMACINML\_00048"  
/inference="ab initio prediction:Prodigal:2.6"  
/inference="similar to AA sequence:RefSeq:CAL34810.1"  
/codon\_start=1  
/transl\_table=11  
/product="RNA polymerase sigma-54 factor"  
/protein\_id="Prokka:DMACINML\_00048"  
/translation="MLRQKITQAPKTKISQTLRSWLPILQANIEDLKENLDKFAEENP  
FLSVQEP IQTQEHNKNYFDSFYKRVNSAFVDNKG FATKSVYELLSEQIIPPLFPTNK  
SQELAGKII ECLNHEGYFEYDEEILKDYDINEIERIRARFKFLDPVGVGAKDYKEAFL  
FALENIELDAELYDFCKMLIQDFENIQNYTKESLYKEALTIFKRFSIPPFL EYFEDSR  
VIIPDIFVYRENNEIKVKINDDYYPEIS IETDGLNHEYLNHYIKEAKNLVDAL TMRKA  
TLYKIGLMIVEYQYDFFMGKDIKPMTFKDLALDLERNASTISR AVANKYLSCDRGLIP  
LRDFFAFALDEEGETSNVGKDFVANLVKNENRLKPLSDSKILELIKKEFKVDIGRRT  
ITKYRKHLNIPSSDRKKLYELEG"

gene complement(46998..47726)



CDS /locus\_tag="DMACINML\_00049"  
 complement(46998..47726)  
 /locus\_tag="DMACINML\_00049"  
 /inference="ab initio prediction:Prodigal:2.6"  
 /inference="similar to AA sequence:RefSeq:ADT72413.1"  
 /codon\_start=1  
 /transl\_table=11  
 /product="ABC-transporter ATP-binding protein"  
 /protein\_id="Prokka:DMACINML\_00049"  
 /translation="MSKLEIVNLEKIIKTKIIQGISLELNSEVVGLLGPNAGKTT  
 TFYMICGLIAPSSGKVLDDGLDITKEPLNKRARLGIGYLPQESSIFKDLSDVEDNLLLA  
 AQIFYKDKKILHEKVEQMLELLSIEPIRLRKGLSLSGGERRRCEIARSLMCEPKFLLL  
 DEPFAVDPIAVAEIQSLINELKKLDIGILITDHNVRETLAICDRAYVIRSGSLLASG  
 NAEIANNKDVKKYYLGAEFKLLD"

gene complement(47719..48126)

CDS complement(47719..48126)  
 /locus\_tag="DMACINML\_00050"  
 /inference="ab initio prediction:Prodigal:2.6"  
 /inference="similar to AA sequence:RefSeq:CAL34808.1"  
 /codon\_start=1  
 /transl\_table=11  
 /product="putative ATP/GTP-binding protein"  
 /protein\_id="Prokka:DMACINML\_00050"  
 /translation="MKEFVLAKDELKTMQLTLPKQGVVLLQGELASGKTSLVQAWVSF  
 LNLDEKVDSPFVSIMQKYENQDICVYHYDIYQEGLEGLLKNGLFENFFEEGLHLVEWG  
 DENLKKALLKLGIPITLEIKISVEDNKRKYVIHE"

gene complement(48123..48410)

CDS complement(48123..48410)  
 /locus\_tag="DMACINML\_00051"  
 /inference="ab initio prediction:Prodigal:2.6"  
 /inference="similar to AA sequence:RefSeq:AHY39902.1"  
 /codon\_start=1  
 /transl\_table=11  
 /product="S4 domain-containing protein"  
 /protein\_id="Prokka:DMACINML\_00051"  
 /translation="MGFKNLIFLVKFMVVDKFLNAVNITKRRAISEDMCRSVGVGI  
 NGVIVKASKEVKVGDIIALHFTDYTQEYKVLALPTTKNIPKNAQSEYVVKL"

gene 48510..49730  
 /gene="argG"

CDS 48510..49730  
 /gene="argG"  
 /locus\_tag="DMACINML\_00052"  
 /EC\_number="6.3.4.5"  
 /inference="ab initio prediction:Prodigal:2.6"  
 /inference="similar to AA sequence:RefSeq:CAL34806.1"  
 /codon\_start=1  
 /transl\_table=11  
 /product="argininosuccinate synthase"  
 /protein\_id="Prokka:DMACINML\_00052"  
 /translation="MKNEVKKVVLAYSGLDTSIILKWLQDEYKCEVVTFTADIGQGE  
 ELEPARKKALSGLIKEENVFIDKDLREEFVKDYVFPFRANTIYEGEYLLGTSIARPLI

AKTQAQIALQTGADAVSHGATGKGNQVRFELGYLAFNPDLKIIAPWREWDLNSREKL  
 LAYAQKHGIDISKKKGKSPYSMDANLLHISYEGLVLEDPAHAPEEDMWRWSKSPKEAP  
 NESEIIELDQKQDLVAINGEHLSPAGLLSKLNELGAKHGIGRLDIVENRYVGMKSRG  
 CYETPGGTILLKAHRAIESITLDREAHLKDELMPKYASLIYNGYWFSPERMMLQALI  
 DESQKHANGRVKLELYKGNVMVIGRESANDSLFNAAYCTFEDEVYNQKDAAGFIKLN  
 ALRFIIAGKNGRKF"

gene 49745..50188  
 /gene="rplI"  
 /locus\_tag="DMACINML\_00053"

CDS 49745..50188  
 /gene="rplI"  
 /locus\_tag="DMACINML\_00053"  
 /inference="ab initio prediction:Prodigal:2.6"  
 /inference="similar to AA sequence:RefSeq:CAL34805.1"  
 /codon\_start=1  
 /transl\_table=11  
 /product="50S ribosomal protein L9"  
 /protein\_id="Prokka:DMACINML\_00053"  
 /translation="MKVLLIKDVKALGKAGEIKEVKDGYQNFLIAKGFKAATNEVL  
 RKYESDKKKEAENLRFELANLEKLKEELSKVTLEISKPVGANGSLFGVTKDEIAHAL  
 KEQTHIEIDKKSLECDTLKSLGTHEVSVKLGHAIHAKFNINIKAE"

gene 50188..50730  
 /gene="hslV"  
 /locus\_tag="DMACINML\_00054"

CDS 50188..50730  
 /gene="hslV"  
 /locus\_tag="DMACINML\_00054"  
 /EC\_number="3.4.25.-"  
 /inference="ab initio prediction:Prodigal:2.6"  
 /inference="similar to AA sequence:RefSeq:CAL34804.1"  
 /codon\_start=1  
 /transl\_table=11  
 /product="ATP-dependent protease HslV"  
 /protein\_id="Prokka:DMACINML\_00054"  
 /translation="MFHATTILAYKGNKSVIGGDQVSFGNTVLKGNVAVKIRKLNG  
 KVLGAFAGSTADAFNLFDMFENLLQSSKGDLLKAAIDFSKEWRKDKYLRKLEAMMLVL  
 DRNHIFLLSGTGDVVEPEDGQIAAIGSGGNYALSAARALAKHANLDEEELVKSSLQIA  
 GEICITYTNTNIKTYVIEDEK"

gene 50727..52046  
 /gene="hslU"  
 /locus\_tag="DMACINML\_00055"

CDS 50727..52046  
 /gene="hslU"  
 /locus\_tag="DMACINML\_00055"  
 /inference="ab initio prediction:Prodigal:2.6"  
 /inference="similar to AA sequence:RefSeq:CAL34803.1"  
 /codon\_start=1  
 /transl\_table=11  
 /product="ATP-dependent Hsl protease ATP-binding subunit"  
 /protein\_id="Prokka:DMACINML\_00055"  
 /translation="MNLTPKEIVKFLDDYVIGQKKAKKIIAIALRNRYRRMQLSPELQ  
 DDIVPKNILMIGSTGVGKTEIARRLAKMMGFPFIKIEASKYTEVGFVGRDVESMVRDL  
 ANAALNLVKNEQREKNKDKIDEFIENKILEKLLPPLPKGISDEKQEEYKNSLEKMRTK  
 LRNGDLDESIVIEIEISQSMFDTNPNLPPEMGAMQDIVKVIKVGSKVKKEMKIDAKN

ALKNEAGEKILDQESIKSEALKRAENEGIIIFIDEIDKIAVSSGNSNRQDPSKEGVQRD  
 LLPIVEGSSVQTKIGTLKTDHILFIAAGAFHLSKPSDLIPELQGRFPLRVELDSLDDK  
 ALYEILTRPKNSLLKQYEQLLKTENLELEFDDEAIKEIAKIASKANEEMQDIGARRLH  
 TVIEKILLEDLSFEADEYAGKKFVVDKMMVEEKLGDIIENKDLARYIL "

gene 52043..52918  
 /locus\_tag="DMACINML\_00056"

CDS 52043..52918  
 /locus\_tag="DMACINML\_00056"  
 /inference="ab initio prediction:Prodigal:2.6"  
 /inference="similar to AA sequence:RefSeq:ALW55063.1"  
 /codon\_start=1  
 /transl\_table=11  
 /product="GTPase Era"  
 /protein\_id="Prokka:DMACINML\_00056"  
 /translation="MKSGFVSIIGRTNAGKSTLINSLLLEEKIALVSHKQNATRRKIKAI  
 IVMNGEDQIIFIDTPGLHESKATLNQFLIQSAIKSMGDCDVILFVASIFDSVKDYENF  
 LSLNPKVPHIIVLNKVDLADNGALLKKLNAYAKFSEYFKAILPYSCKKKSQYQKPLNE  
 LCKLLPEHEHFYDSEFLTPSSQKIDFRDFILESVYENLSEELPYSCEIMIKNTKETPN  
 LFIIDAQIITDTNSHKAMLIGKDGVT LKRIGKDARFKISKLIQNKVLLKLFVVVKKNW  
 QKDEVFLKKILNYEE"

gene 52908..53984  
 /locus\_tag="DMACINML\_00057"

CDS 52908..53984  
 /locus\_tag="DMACINML\_00057"  
 /inference="ab initio prediction:Prodigal:2.6"  
 /inference="similar to AA sequence:RefSeq:CAL34801.1"  
 /codon\_start=1  
 /transl\_table=11  
 /product="putative transmembrane protein"  
 /protein\_id="Prokka:DMACINML\_00057"  
 /translation="MKNKAHFIFGLENLIYKQKNGNFEEDSLFKELTKECDLQNPFEYQ  
 LAFLKQDQIYHCFLTWAAKLPKTKFCFPEPLIFQSLFLENKIKEGNFCILEISSKKVF  
 LCFYEQGKFKTKLNFCDNVEEFINKSRILELLQHYESKILLSGKAHEIIDLISTKA  
 KLPLKIIQEDKITLSNHSIHHLDKNANFIKYYQKHLWPYFKFIFLFLVLSFIISIGILS  
 LIDFTQYQSAKKTHIQNEISQNKIYEIQENQNQKLANIEKLQLEIQTQDLLLEKYSE  
 QLSKITQNFKADKDTILILTKIITWLNHSLKIANLMIDKTLITIKFSNEENFNKALQ  
 FTSPQFNLSQDKFLYEITLRALQ"

gene 53981..54538  
 /locus\_tag="DMACINML\_00058"

CDS 53981..54538  
 /locus\_tag="DMACINML\_00058"  
 /inference="ab initio prediction:Prodigal:2.6"  
 /inference="similar to AA sequence:RefSeq:CAL34800.1"  
 /codon\_start=1  
 /transl\_table=11  
 /product="putative periplasmic protein"  
 /protein\_id="Prokka:DMACINML\_00058"  
 /translation="MNQIEQFLENLSPREKILIIYLT TILLAVLLSFHFYHSYLKSLFN  
 HEFFIQSDEVNKIIITNQDLNQQIKQLEEKLNISIQDKIKSYENHLSTFNKDYETYIKN  
 LQNLALKNNLQISNISRLQEENSYHRISVDILGDFNPILSFIQDVENSNLHYEIQKFE  
 IDNTSNLNLHLKLTLSFIALVKKN"

gene 54628..56415  
 /locus\_tag="DMACINML\_00059"

CDS 54628..56415

```

/locus_tag="DMACINML_00059"
/inference="ab initio prediction:Prodigal:2.6"
/inference="similar to AA sequence:RefSeq:CAL34798.1"
/codon_start=1
/transl_table=11
/product="putative aminopeptidase"
/protein_id="Prokka:DMACINML_00059"
/translation="MNIYKTRVEKIRQFMKEKLDAYLILSADPHLNEYLPSFYQSRA
FVSGFKGSAGSLIITLQDAFLWTDGRYWIQAKKELEGSDILLQKQDANNTFLKWLKEN
LNKEQNLGIDFSVLSLALQKEIQKNCKAELKNIDLISPIWENRPALPKNKVYEHELY
CSYSRKEKLTLVREKMAKLQAQNHLISSLDDIAWITNLRGSDVYNPNVFLSHLLILEE
KALLFIDREKIDFELEKKNLDGIWLKDYNEIQDELKKLQNTNLLIEPSKTTALLIEI
LDKSVEILEEINPSTHLKAIKTDKEIAHIQNAMIEDGVALCKFFAWLEENIENNTQIT
ELDIDTKVTEFRSQSPYYISNSFATIAGFNANAALPHYKAEKESFSYIQKNGLLLIDS
GGQYKNGTTDITRVAIGELNKEQIHDTLVLKAHIAISSTVFPKIDITMPLLDAITRA
PLWQEQLDYAHGTGHGVGYFLNVHEGPQTL SYFSPVLEKTKAKEGMLTSIEPGIYRTG
KWGIRLENLVNTKIKNPKNKDFGEFLYFKPLTLCPEFISCIDKTLLSIKEKAWINAY
HKEVYEKLSPKLHDNPKALKWLKERTETI"
gene complement(56465..58300)
/gene="pbpC"
CDS /locus_tag="DMACINML_00060"
complement(56465..58300)
/gene="pbpC"
/locus_tag="DMACINML_00060"
/inference="ab initio prediction:Prodigal:2.6"
/inference="similar to AA sequence:RefSeq:ABV52210.1"
/codon_start=1
/transl_table=11
/product="penicillin-binding protein 2"
/protein_id="Prokka:DMACINML_00060"
/translation="MRMRLVVGFIILFFIFLLSRVYYLSIKSNVYYEELAKQNAVKTE
FIAPTRGQISDRNGTPLAINDLGFISISIKPYLTLKRANRGVLEKELNQLQEFFPDNLV
TKLAELYKKNDSYYNQDFIKIIDFIPSQEMMKHYSELNLENIRIDPAGQRKYPFGKL
ASHIIGYVGKADLQDIKENEIAKLTNFTGKSGIERYYNDVLQGEKGTQVYKVNALNQE
VEQLSYTSALSNDIELTIDIELQSFLTQLFEGNAGAAIMDISDGSILAAGSFPEYDL
NPFVTGISYKEWDELSNLDHPFTNKLINGYPPGSVVKMGVGLSFLNSKSNPSTQF
FCNGSVELGGRFFRCWNRAGHGAVDLKHAIKASCDVYFYDGLQVGDIDQISRTL SRIG
FGAKTGVDLPNEFVGILPSREWKMORYKQAWFQGDTLNTSIGQGNFLATPMQIARYTA
QIAKGGEVIPHFLKSVENNSITEDKTQDSNEIFTLFEKSQLPYIRDAMYAVANEQGG
TSYHYLRNLEVKVAAKTGTAQVVGFSQADKNRVDEKQLKYYTRSHAWVTSYAPYSKPR
YVVTVLVEHSGRTISSGVATAKIYQKMIDLGYFKPESKVNSSKKN"
gene complement(58300..58794)
/locus_tag="DMACINML_00061"
CDS complement(58300..58794)
/locus_tag="DMACINML_00061"
/inference="ab initio prediction:Prodigal:2.6"
/inference="similar to AA sequence:RefSeq:CAL34796.1"
/codon_start=1
/transl_table=11
/product="putative integral membrane protein"
/protein_id="Prokka:DMACINML_00061"
/translation="MRKSISTYKVKLNGSYIFLGLCILYQILGSIFFYMPLLYGVFF
CYMYFLLERQKTFNKLDFRWYFSLFFLFFTDITYDFFLFSSWFAFAIFYTICADWIK
TNFKIGKIIPVILVLCVYAFIFVLDAIFSYVGDQEFKMPSPFGYIMISIMFECLFAYMLF

```

```

gene      RSKF"
          complement(58796..59386)
          /locus_tag="DMACINML_00062"
CDS      complement(58796..59386)
          /locus_tag="DMACINML_00062"
          /inference="ab initio prediction:Prodigal:2.6"
          /inference="similar to AA sequence:RefSeq:ABS44681.1"
          /codon_start=1
          /transl_table=11
          /product="GTP-binding protein"
          /protein_id="Prokka:DMACINML_00062"
          /translation="MIISAKFISSLDFKDFNFASHFSEVAFLGRSNVKGSSLIINSLCK
          QKKLAKSSATPGKTQLINFFEVLCCKDEDKFSIHFDLPGFGYAKVSKNLKEIWNKNL
          DEFLKLRSSIKLFVHLIDSRTNLDIDLNLDEYLKSF LKPDQRILKVFTKCDKLNQSE
          KAKLKNNFKDAILISNLNKMGLDDLEHEIIKQTLGL"
gene      complement(59370..59840)
          /locus_tag="DMACINML_00063"
CDS      complement(59370..59840)
          /locus_tag="DMACINML_00063"
          /inference="ab initio prediction:Prodigal:2.6"
          /inference="similar to AA sequence:RefSeq:CAL34794.1"
          /codon_start=1
          /transl_table=11
          /product="putative OstA family protein"
          /protein_id="Prokka:DMACINML_00063"
          /translation="MVRKIILFLMSISISLASQIEVKALNFYSDENKGESILSGNVEI
          IRGDDVLTAEKVIIYTDKNRKPIRYEAVQANFKIVLKGKTYKGSQDKFIYNVAKDIY
          EIDGNAYINELESNQKLYGDRIVVDRNNVYRVESKDKKPARFIFDLEQNDNKR"
gene      complement(59825..60337)
          /locus_tag="DMACINML_00064"
CDS      complement(59825..60337)
          /locus_tag="DMACINML_00064"
          /inference="ab initio prediction:Prodigal:2.6"
          /inference="similar to AA sequence:RefSeq:CAL34793.1"
          /codon_start=1
          /transl_table=11
          /product="putative membrane protein"
          /protein_id="Prokka:DMACINML_00064"
          /translation="MAIRIFGILIALFTITFTILSLQDPYSLNIKSYALNFKNIEAFN
          LNAYELNASNVKSYYKAQTWTRYVDKDEFDNFVNFNLDNFNSANKLELKGKEMNKVLF
          EGNVTYIGSNNTKILADKVEYEPKNKILSTDTGFKALINGSIINGNTLNVDVEKKILQ
          VQGVNAWLER"
gene      complement(60328..60816)
          /locus_tag="DMACINML_00065"
CDS      complement(60328..60816)
          /locus_tag="DMACINML_00065"
          /inference="ab initio prediction:Prodigal:2.6"
          /inference="similar to AA sequence:RefSeq:CAL34792.1"
          /codon_start=1
          /transl_table=11
          /product="putative HAD-superfamily hydrolase"
          /protein_id="Prokka:DMACINML_00065"
          /translation="MIELIFLDVDGCLTDGKIIYTSNGSVIKEFDVKDGAIEAWIKL
          GKKIAIITGRNCPCVSARAKDLKIEIVHQGVKDKLTCACKILEELNLDLFSQCAAIQGY

```

FNDKNLLENVGLSFKPKDAHKDLKVDITLDKKGKGAAVAQMI EYI I KKNM QE EWDL  
WL"

gene complement(60819..61658)  
/locus\_tag="DMACINML\_00066"

CDS complement(60819..61658)  
/locus\_tag="DMACINML\_00066"  
/inference="ab initio prediction:Prodigal:2.6"  
/inference="similar to AA sequence:RefSeq:CAL34791.1"  
/codon\_start=1  
/transl\_table=11  
/product="putative lipoprotein"  
/protein\_id="Prokka:DMACINML\_00066"  
/translation="MQTIKQKLLKTLPKLLAASLVATFSSGCFGGFSSVGSQAQIYYP  
SNDFHSSPSGSGSKGTMKPYTINGKTYPTVVSGETADGIASWYGPFGHGKTSNGE  
TYNQNGLTAAHKTLPMNTILKVTNLNNRQVTVRVNDRGPFVNNRIIDLKGAANQID  
MIAAGTAPVRLVIGFGSANSNNVHNSINYGTSGGIANNGQIYEGGNFMVQIGAFK  
NPSGAQTIASRYKTYRTYSSTIRKSSVDGLSRVFLTGFRSEEEARDFAASGAFAGAFV  
VRE"

sig\_peptide complement(61566..61658)  
/locus\_tag="DMACINML\_00066"  
/inference="ab initio prediction:SignalP:4.1"  
/note="predicted cleavage at residue 31"

gene complement(61603..62736)  
/locus\_tag="DMACINML\_00067"

CDS complement(61603..62736)  
/locus\_tag="DMACINML\_00067"  
/EC\_number="3.2.1.-"  
/inference="ab initio prediction:Prodigal:2.6"  
/inference="similar to AA sequence:RefSeq:CAL34790.1"  
/codon\_start=1  
/transl\_table=11  
/product="putative secreted transglycosylase"  
/protein\_id="Prokka:DMACINML\_00067"  
/translation="MKKIILCFILFYNFLFAQTTTPEFYERQMSVLRNLDIDPSFISD  
LAFVQSQQDLRSKHAPTLIDGIQNF SKVTPMIRKILAQQEVPEEILYLAMVESGLKAH  
SVSNAKAVGVWQFMQPTARNLGLRIDAYVDERRDPVKSTYAAVHYLKSLKEEF GKWYL  
ALLAYNCNGNKL RQAIKQAGSDDL RILLSDKKYLSLETRNFIRKILT LAF LANDRDF  
LLDKDGLVNYALNNDFAKVDAPSSVALKDLAKNLNMDLATFKKYNPQFKHGFTPPGK  
GYMYIPLNKVAFDKNFKVEKLAKVDTTIPMTKVYVVKSGDSLYKIAKTYNTSVEQI  
RELNKIAKNHLSINQKLIIPIKENKNANYKTKAKENFTKVVSR"

sig\_peptide complement(62683..62736)  
/locus\_tag="DMACINML\_00067"  
/inference="ab initio prediction:SignalP:4.1"  
/note="predicted cleavage at residue 18"

gene complement(62739..63551)  
/locus\_tag="DMACINML\_00068"

CDS complement(62739..63551)  
/locus\_tag="DMACINML\_00068"  
/inference="ab initio prediction:Prodigal:2.6"  
/inference="similar to AA sequence:RefSeq:CAL34789.1"  
/codon\_start=1  
/transl\_table=11  
/product="putative TatD-related deoxyribonuclease protein"  
/protein\_id="Prokka:DMACINML\_00068"

```

/translation="MFLNLEFKDGLKIVDTHCHLDSEVFKEDLDELLKHSFDNGIEKI
IIPGADIKDLPYAADLASKYKNVFFAAGVHPYELEGFDEKILRAYLKDEKCVAVGECG
LDYFRFKSEDFKEREKEKEEQKRLFVAQLELAKEFKKPVIIHSREANNDTYEILHEHS
KDLVGGVLHCFNASEHLLRLSNDGFYFGIGGVLTFKNAKNLVNILPQIPKDRLLLETD
APYLTPEPYRGKRNEPLLQLVANKMSEILDLPQELLGICLENSYRLFFKG"
gene complement(63542..64786)
/locus_tag="DMACINML_00069"
CDS complement(63542..64786)
/locus_tag="DMACINML_00069"
/inference="ab initio prediction:Prodigal:2.6"
/inference="similar to AA sequence:RefSeq:CAL34788.1"
/codon_start=1
/transl_table=11
/product="two-component response regulator"
/protein_id="Prokka:DMACINML_00069"
/translation="MNKKILLIDDNKMLGKLLAKKIQTTLNREVDIVFSLAEVKALPD
DEYFLTFADLCLPDAPNGEVVDYLLAKNWPVIVLTASNDKATRDKFMDDKILDYIFKE
SDTCIDQIIDSIVKLEHYAKTKVILALSLSERNEIKLLTQRKFSVLAAGHGEAMS
YLNDNNDIKLIIADANMPVISGSELLSEVRTRFSDSELGVIIILGDKDDALEASLLVSG
ANEYLKPLSKESLNCRLDKCLHYMANMQFLSIYNNLDPISGIKNSNALLNCVEDYLN
EIACKEEEFAFAFLDIDNLRNLNEEYGYEVGDKIVKICADEIINETKGRDIVGRYSAE
KICIVLKNISQERAIKILSRIRVNIKKAGILVNLDEVFFTASIGVVFAGSGDKFETLV
DKASKALSQAKANGKDRVEVCS"
gene complement(64875..66398)
/locus_tag="DMACINML_00070"
CDS complement(64875..66398)
/locus_tag="DMACINML_00070"
/inference="ab initio prediction:Prodigal:2.6"
/inference="similar to AA sequence:RefSeq:CAL34787.1"
/codon_start=1
/transl_table=11
/product="putative DNA repair protein"
/protein_id="Prokka:DMACINML_00070"
/translation="MINRVLMKENLGFKEVELEISQGLTVFTGLSGAGKSVLFGKILS
AFALSDSEAKLVEIALDDKIDLEEYGIESEDENVFKLLKDKNAKYFINNQSISKSLI
HLSKKFIKYLSAKEINEFSNEKFLNLLDALECVKNPEFEDFLSHFKDDYKQWLQISEE
LTTILEEEKRIEELKELASTQIERISKINPKIGEYEELLNLKKLSKKDKIEAAWEKA
NAIFELEKVVIDALNLSEKDTSFSECLNELRIIAENEKIEDLDFDIEEVLNRIEDLS
SLIKRYESIENALEVLENKKNELAHYDNLSEKKELEKLEKIEKINQSTQLLTQAR
MQNLKTLEDYLNLYLKNLYMKNVSELVNISKITSLGKDEIKLSINAANLKNLSSGEL
NRLRLAFIATECKILNSGTGIIIFLDEIDANLSGKEAMSIANVLNELAAFYQIFAISHL
PQLSSKAHNHFLVEKNASCSTVRKLNKNEERIKELARMISGETITDEALEFAKTLFKA"
gene complement(66398..67258)
/locus_tag="DMACINML_00071"
CDS complement(66398..67258)
/locus_tag="DMACINML_00071"
/EC_number="2.7.1.23"
/inference="ab initio prediction:Prodigal:2.6"
/inference="similar to AA sequence:RefSeq:CAL34786.1"
/codon_start=1

```

```

/transl_table=11
/product="putative inorganic polyphosphate/ATP-NAD kinase"
/protein_id="Prokka:DMACINML_00071"
/translation="MQNKIDYKNIKKIGLAARPNSNLDKEILTLKEILEKKGVVELLY
KESSENIKLPKYDLDTLFEISDFVISLGGDGTLSLRCRKACEHNKAVLGIHAGHLGFL
TDFKVDEAEVFFFAFFRGEFRVENPFLSIIILEANDGQITQKFAFNDVVISKDRKASM
AHIEVFRKAKKFNEYFGDGLIVATPAGSTAYNLSANGPIVYTLAQAFILTPVCSHSLT
QRPIVLPKGFLEIGAKDCIFSIDGQENYKMNDFKSVKVGLSDKSVALIHPKNRDYFQ
ILREKLNWGH"
gene 67351..69102
      /gene="aspS"
CDS  /locus_tag="DMACINML_00072"
     67351..69102
      /gene="aspS"
      /locus_tag="DMACINML_00072"
      /EC_number="6.1.1.12"
      /inference="ab initio prediction:Prodigal:2.6"
      /inference="similar to AA sequence:RefSeq:CAL34785.1"
      /codon_start=1
      /transl_table=11
      /product="aspartyl-tRNA synthetase"
      /protein_id="Prokka:DMACINML_00072"
      /translation="MRSHYNTDLNSAHIGEYVVKLCGWVNSYRDHGGVIFIDLRDRSGI
IQLVCDPNSKEAHEIASRTRNEFVLI AEGKIRPRGEGLTNPKLKTGEIEVVVSKLII
ENESAVPPFGIGDESUNEELRLKYRFLDLRNPPLYENFALRSKACIAARNSLANMGFL
EVETPILTKATPEGARDYLVP SRVHQGEFYALPQSPQLFKQLLMCSGFDRYFQIAKCF
RDEDLRADRQPEFTQIDVEMSFCEQKDVIAETAETFLKDIKACGKEIQIPFRQMPYKE
AMENYGSDKPDRLFDLKLIDVIDIFAKSNEIFANIADSKKNRVKALRVKPGDTIFS
KRQMQRFEFVRKFGAQLAFIQVKEDGLKGPLCKFFNEEDLNELTKRCELEVGDVVF
FGAGVKTVLDYMGFRIFLAGELNLI NPDAL EFLWVVDFPMFEQNDGYSAMHHPF
TMPKNIDETDLEEISSIAYDVVLNGVELGGGSIRIHKNDIQQKVFKLLNIDEEQQKEK
FGFLLDALSGAPPHGGIAIGLDRLIMLV TGANSIREVIAFPKTQRAQCLMTDAPSV A
SNEAMRELGIKLRNVK"
gene 69099..69674
      /gene="adk"
CDS  /locus_tag="DMACINML_00073"
     69099..69674
      /gene="adk"
      /locus_tag="DMACINML_00073"
      /EC_number="2.7.4.3"
      /inference="ab initio prediction:Prodigal:2.6"
      /inference="similar to AA sequence:RefSeq:CAL34784.1"
      /codon_start=1
      /transl_table=11
      /product="adenylate kinase"
      /protein_id="Prokka:DMACINML_00073"
      /translation="MKELFLIIGAPGSGKTTDASLIAQADADVTHYSTGDLLRAEVAS
GSELGKTIDGFISKGNLVLVVVNTIVSALKTAPTKTVIDGYPRSV EQMVEFDKVL
SEQNEICLKGVIEVRVSEQVAKDRVLGRSRGADDNEEVFYNRMKVYTEPLEEIIISFYQ
KKKLHFIIDGERTIEPIVADMKELIKKIQSI"
gene 69684..70202
      /gene="ppa"
CDS  /locus_tag="DMACINML_00074"
     69684..70202

```



```

/gene="ppa"
/locus_tag="DMACINML_00074"
/EC_number="3.6.1.1"
/inference="ab initio prediction:Prodigal:2.6"
/inference="similar to AA sequence:RefSeq:CAL34783.1"
/codon_start=1
/transl_table=11
/product="inorganic pyrophosphatase"
/protein_id="Prokka:DMACINML_00074"
/translation="MDLSKIKIGDIPNKINAVIEIPYGSSIKYEIDKDSGAIMVDRVM
ASAMFYYPANYGFIANTLADDGDPVDILVLNEYPIQAGAVIPCRLLIGVLIMEDESGMDE
KLLAVPNSKIDARYDNIKTYTDLQPATLNKIKNFFETYKILEPNKWVKVQDFKDEKAA
IEILEKAIKNYK"
gene 70250..70750
/gene="mrsA"
/locus_tag="DMACINML_00075"
CDS 70250..70750
/gene="mrsA"
/locus_tag="DMACINML_00075"
/EC_number="1.8.4.11"
/inference="ab initio prediction:Prodigal:2.6"
/inference="similar to AA sequence:RefSeq:CAL34782.1"
/codon_start=1
/transl_table=11
/product="putative peptide methionine sulfoxide reductase"
/protein_id="Prokka:DMACINML_00075"
/translation="MKNIILGGGCFWCVEAAFENCEGIIHTEVGYTGGNDNPSYESVC
NGDGNIEVVKIIYNETKISLEQILSLFFKIHDPSTFDKQGDIGIQYRSAIFYESQSD
KNTIEDFIKKEQVNFPLPIVTQIYKLRYYKAEDYHQHYFIHNPNQSYCRFVIAPKLE
KIKNYE"
gene complement(70975..71850)
/locus_tag="DMACINML_00076"
CDS complement(70975..71850)
/locus_tag="DMACINML_00076"
/inference="ab initio prediction:Prodigal:2.6"
/inference="similar to AA sequence:RefSeq:ABV52194.1"
/codon_start=1
/transl_table=11
/product="NOL1/NOP2/sun family protein"
/protein_id="Prokka:DMACINML_00076"
/translation="MEYNLASIYNDKELENLKNFSFKLPKKICCFINRLKCDNLTLERE
FQDLNLEYEKLNEYCYLKFACDKSVLSSMQAFNEFKFYIQNYASYLCALNLDVKAGQS
VLDMCAAPGGKSINLANFMQNEGYLACNEASKDRFFTLQKNLKNYGVKARVFMKDGKN
IGNLCPLKFDKILLDAPCSTLAKMGLELEKSSKEIKNIAKLQKLLHSALKALKVGGGE
LVYSTCTFTKEENEVIENALRSDFDIELLDINLENALAKNGQSREFEIEISKCKRILP
CEEYDGGFFIAKLRKN"
gene complement(71840..72220)
/locus_tag="DMACINML_00077"
CDS complement(71840..72220)
/locus_tag="DMACINML_00077"
/inference="ab initio prediction:Prodigal:2.6"
/inference="similar to AA sequence:RefSeq:ABS43581.1"
/note="conserved hypothetical protein TIGR00250"
/codon_start=1

```

```

/transl_table=11
/product="hypothetical protein"
/protein_id="Prokka:DMACINML_00077"
/translation="MRALALDVGLKRIGVALCIDKIAIPLEGIIRKNRNQAANEVKNL
IQIHDISLLIVGIPKGGSEEMTRRIKHVSLLEFDKEIRFVDESGTSKEALGYGVA
NTRKKDAKLDLAALIMIKDYFGI"
gene complement(72217..72987)
/locus_tag="DMACINML_00078"
CDS complement(72217..72987)
/locus_tag="DMACINML_00078"
/inference="ab initio prediction:Prodigal:2.6"
/inference="similar to AA sequence:RefSeq:AGQ95318.1"
/codon_start=1
/transl_table=11
/product="DNA processing protein DprA"
/protein_id="Prokka:DMACINML_00078"
/translation="MQNELPSNYLELFKELKNPPKLYYKGNLKLLEQRKIAIIGSRR
MSTYTKNCVFEISSLLKNSKISVSSGGALGVDISASMAAMPSTIGVFANGLDEIYPRS
NEKIIKQIYENALALSENESHYKPKPYDFLLRNRLIALSEAVVVAQADLQSGSMQSA
RLALELNKPLYVLPQRKNESDGTNLLLQERNANLLDFKEFVSCFGIIEEEKDEFDF
CRQGVSVDEATQIYGEKVYEYELEGKISIEGLFIRVLV"
gene complement(72977..74029)
/locus_tag="DMACINML_00079"
CDS complement(72977..74029)
/locus_tag="DMACINML_00079"
/inference="ab initio prediction:Prodigal:2.6"
/inference="similar to AA sequence:RefSeq:CAL34778.1"
/codon_start=1
/transl_table=11
/product="putative periplasmic protein"
/protein_id="Prokka:DMACINML_00079"
/translation="MSKLLIQIKRYLIIAILFLICVILFLGILIQYQDSQNALKFAQN
SSKNTTIEPKQENISNENHSGIFKEIPYKDENDNFQENNSILEQQIKDLNLSSVIEQ
NLSKLDENLSLVPDQNLKEENLIKDTNSSKIKQARLAIIDDMANISQVKALQALKL
KLIPSFPPDKNHIDTPKLALKFDFYMVHLPLAAMNYTKPELDTLNPSDSEKRIFKKI
KQIKKDFKDLKFINNHTGSLFTSDEKAMKKLYKAFFEKEELIFVDSKTIASSKAPKVAK
ALGQIYIQRDVFQDNQDDVAYIKQLMEAVNLAKKKGFAIAIGHPRKNTFKALEQSKD
LLESVELVYLSEIYAK"
gene complement(74032..75054)
/gene="ilvC"
/locus_tag="DMACINML_00080"
CDS complement(74032..75054)
/gene="ilvC"
/locus_tag="DMACINML_00080"
/EC_number="1.1.1.86"
/inference="ab initio prediction:Prodigal:2.6"
/inference="similar to AA sequence:RefSeq:CAL34777.1"
/codon_start=1
/transl_table=11
/product="ketol-acid reductoisomerase"
/protein_id="Prokka:DMACINML_00080"
/translation="MAVTVYYDKDCDLSLIKSKKVAIIGFGSQGHAMNLRDNGVNV
VIGLREDGSSFSKAKSAGFEVMSVSEASKVADVIMILAPDEIQADIFNAEIKPNLSEG
KAIAFAHGFNIHYGQIVAPKGIDVIMIAPKAPGHTVRNEFAIGGGTPCLIAIHQDESK

```

NAKNLALSYASAIGGGRTGIIETTFKAETETDLFGEQAVLCGGLSALIQAGFETLVEA  
 GYEPEMAYFECLHEIKLIVDLIYQGGIADMRYSISNTAEYGDYITGPKIITEETKKAM  
 KGVLDIQDGNFAKDFILERRAGFARMHAERKNMNSLIEQTGRNLRAMMPWISAKKL  
 IDKDKN"

gene 75177..77111  
 /locus\_tag="DMACINML\_00081"

CDS 75177..77111  
 /locus\_tag="DMACINML\_00081"  
 /inference="ab initio prediction:Prodigal:2.6"  
 /inference="similar to AA sequence:RefSeq:CAL34776.1"  
 /codon\_start=1  
 /transl\_table=11  
 /product="putative ribonuclease"  
 /protein\_id="Prokka:DMACINML\_00081"  
 /translation="MKEFLNNLNYGISAHEVSNEFKQILRELLANNIIKEHKNRYYLN  
 NGYVFGTLDISSKGTGFLQCFDESFKKDLLIENKNLKGANYKDIVAACLPLKKRPS  
 AKVVLVLRANETSLVITKRYGEAILGMNIKTGLSTALKASQKSLKALPLGTILKIEN  
 QDNIIIEVLGHIDDESIDEKISLALFNKNSEFSDACIKEALANGDSVDASMYENRDL  
 RALPFCTIDPVHAKDFDDAIYFDTEKRELYVAIADVSEYVYAYSIDKEARNRGSFY  
 FPHIAIPMLPRPLSENICSLKPHLDRLAYCFKITLDLDCVKVKEELFETIINSKRRFN  
 YDEVEILIQKPKLKSPLYKLFETKTLRKNRLKNAFEFRTEELRMNLDENLSLQS  
 TIFEKDTPSHNLIEDCMLANKAAAKLIDVGVFRNHSSADMKKIDRLNELLELGIDV  
 KLPNLPELIRDIQALADELGLRAEVDKLIKAQKKAHEYSSSENGGHFGLGFDKYSHFT  
 SPIRRYSDLILHRLKAKQKKDEKLFNYLLLNQSTCENLSVLEREADKVAYDFMDRK  
 FARWAAKNIGKKFKALVQNDGICIAKLDDEIKGADIILYDTRVNLESVEVQILEAD  
 IIMAKIYAKITQRLRKESNV"

gene 77104..78069  
 /locus\_tag="DMACINML\_00082"

CDS 77104..78069  
 /locus\_tag="DMACINML\_00082"  
 /inference="ab initio prediction:Prodigal:2.6"  
 /inference="similar to AA sequence:RefSeq:EAQ72985.1"  
 /note="conserved hypothetical protein"  
 /codon\_start=1  
 /transl\_table=11  
 /product="hypothetical protein"  
 /protein\_id="Prokka:DMACINML\_00082"  
 /translation="MYRKELQNL LSKNQIDNFFFLYGADNFQSELYADFIKEKYQADE  
 ILKLFEEYSFTRASDFLSGGSLFSEKLLLEIKTSKKIPTKELKVLVELCKNNKDNFL  
 LLELYDESSQSDIEKIFSPNFVRFKANNAREGIELLSIKAKQLHIEITQNALFTLF  
 TSFDENLYLAASELNKFSGLRVDEKIIIEQYCYSLNIGSFESFFEKILKRADFKNELEK  
 ILDNFNEIALINSLNSAFYRLFKIALYAKIYGKVDKELLGYPQPVAQNLNEQAFS  
 LKIKHYKEIFNLLLKSEYELKTN SKLAKKEFLIATLLKLARIKS"

gene complement(78703..79572)  
 /locus\_tag="DMACINML\_00083"

CDS complement(78703..79572)  
 /locus\_tag="DMACINML\_00083"  
 /inference="ab initio prediction:Prodigal:2.6"  
 /inference="similar to AA sequence:RefSeq:CKG88255.1"  
 /codon\_start=1  
 /transl\_table=11  
 /product="hypothetical protein"  
 /protein\_id="Prokka:DMACINML\_00083"  
 /translation="MLKISKRISTIVFIVLVFIAVSSVYEFIHEALKFKEDNESKAR

ENLSILIKWSENEGKEELEYAKKLNKETYNQEKVTQMIKLNKMIQTSIEDMQILTFY  
GFADEDEELTRKASQIVLRLNMDIILYLLDNEKTFIGHQTYFLDKERFKIFEDFLFF  
LNARLEEDFLKKNNDNDFEIIIEIVTYINLLIGLDGAFANMMYLRELSIAPICDLNPNKT  
IAILNGIEKIDIAVDRIYINLINSKIKFIAKDDYLMKMIENINNNYPKLLGQKQINE  
LKSIQSKLKECKQ"

gene complement(79767..80843)  
/locus\_tag="DMACINML\_00084"

CDS complement(79767..80843)  
/locus\_tag="DMACINML\_00084"  
/inference="ab initio prediction:Prodigal:2.6"  
/codon\_start=1  
/transl\_table=11  
/product="hypothetical protein"  
/protein\_id="Prokka:DMACINML\_00084"  
/translation="MRDKFLKRVLKLCCFFTFICNAAYALCTDELSDEDLKFIQNANL  
NQVNFKCNINNQTYYYNNLTRKEYLQNLLEELKAIYFNLNKEELKTLASYVIYLNEALFY  
LKLDLNFNFFSVQKNDISNLENLRNSHYKQIENSLTLNQEKLQNSFVLADQILQK  
NAIAKDYTNISSKLEQSKQENKEILKYIESSNKDIFSLKNINQLAFLYNANLLINEA  
KNYPQRSALAYDKNEALKLLEILLKTMNKISNKEDKLVLLQGALITYNKAISSLDIDL  
PLNEQKYKKIKRKEYIILMGRFFQSDAFAYFNTNIKRKFDKDDFIQIFPKRTSEIL  
KLIAIYDQTKKTLMLTKEALKYKG"

sig\_peptide complement(80766..80843)  
/locus\_tag="DMACINML\_00084"  
/inference="ab initio prediction:SignalP:4.1"  
/note="predicted cleavage at residue 26"

gene complement(80833..81177)  
/locus\_tag="DMACINML\_00085"

CDS complement(80833..81177)  
/locus\_tag="DMACINML\_00085"  
/inference="ab initio prediction:Prodigal:2.6"  
/codon\_start=1  
/transl\_table=11  
/product="hypothetical protein"  
/protein\_id="Prokka:DMACINML\_00085"  
/translation="MPLYKECEVCKTKINKLQNIWNIFSGKLEIKCKNCKSKYGVSNK  
IINWIYDTFGYLLIPDNMLLIIFFGGYFFVKYGLLVALYLLAIILLARKLIGIVLL  
ILCKLKRIENER"

gene complement(81576..81851)  
/locus\_tag="DMACINML\_00086"

CDS complement(81576..81851)  
/locus\_tag="DMACINML\_00086"  
/inference="ab initio prediction:Prodigal:2.6"  
/codon\_start=1  
/transl\_table=11  
/product="hypothetical protein"  
/protein\_id="Prokka:DMACINML\_00086"  
/translation="MENLYETWEDEKEFKKYNDYFLKTNQEEKHNNLHKLLIYNQN  
AKNDFLHMSLLGLDKIYLQALVDKNKIYFTNLSWEFALRIFDNKFLS"

gene complement(82051..82395)  
/gene="hypA"

CDS complement(82051..82395)  
/gene="hypA"  
/locus\_tag="DMACINML\_00087"

```

/inference="ab initio prediction:Prodigal:2.6"
/inference="similar to AA sequence:RefSeq:CAL34773.1"
/codon_start=1
/transl_table=11
/product="hydrogenase expression/formation protein"
/protein_id="Prokka:DMACINML_00087"
/translation="MHELSIVESLIELCEENAFAHKAKSVQEIVYKIGRLSGIEVELF
RRCFETFRENSELCKNAKLFIELAPLEILCLKCDQTSILEENVFKCPKCESIEYKISQ
GEDLHMLRVME"
gene complement(82395..83369)
/gene="hypE"
/locus_tag="DMACINML_00088"
CDS complement(82395..83369)
/gene="hypE"
/locus_tag="DMACINML_00088"
/inference="ab initio prediction:Prodigal:2.6"
/inference="similar to AA sequence:RefSeq:CAL34772.1"
/codon_start=1
/transl_table=11
/product="hydrogenase isoenzymes formation protein"
/protein_id="Prokka:DMACINML_00088"
/translation="MKNISLAHGGGGEEMNELLTKLFKIFDNKILNESNDAAILGNLA
LSTDSFVLSPIFLDDEVNIGKLCVCGSVNDVLMVGAKPKYLSLGLILEEGFELEKLER
ILKSIKEECEKCEVELVCGDTKVPKGGKDEIYINTTALGEIISKKESKNIKAGLSIL
VSGDVGRHGASVLIKRNELEADIKSDCKALNKEVLELLEKDIKVVAMRDATRGGLSAV
LNEWAKQSGNDLLIFEKIKIQDEVLGLCELFGYEA FELANEGTFILCVEKEDELKAL
EILKKNANASIIGEVL EKKARVILENAYGAKRFLEAPKGELLPRIC"
gene complement(83366..84457)
/gene="hypD"
/locus_tag="DMACINML_00089"
CDS complement(83366..84457)
/gene="hypD"
/locus_tag="DMACINML_00089"
/inference="ab initio prediction:Prodigal:2.6"
/inference="similar to AA sequence:RefSeq:CAL34771.1"
/codon_start=1
/transl_table=11
/product="hydrogenase isoenzymes formation protein"
/protein_id="Prokka:DMACINML_00089"
/translation="MNFIDEFRDKDNILALKKLI EQEIKTPINIMEICGGHTHSIMKY
ALPSILPKEINF IHGPGCPVCMRVRIDTAIKLASMKDTIFCTLDLLRVPGSEISL
LDLRARGADVRLYSPLEVL DIAKQNLNKTIIFFAIGFETTPMSALLLEKVIEQNLK
NVFFHINHITVPAPVEAIMNDENVKINAF LGPSHVS VITGYGIYKPLAAKFKTPIAVS
GFEPVDIMESVLNIVRQINKGSFEVFNQYKRAVSEK GNEKAQNLVKKYFQVCDFFFRG
LGLIKEGGLELKEEF SAYDASKQFDCAVQSKSESKACICGQILRGLAKPYDCKVFGKA
CTPKSPIGSCMVS GEGACAAYYKYSKVNA"
gene complement(84441..84722)
/gene="hypC"
/locus_tag="DMACINML_00090"
CDS complement(84441..84722)
/gene="hypC"
/locus_tag="DMACINML_00090"
/inference="ab initio prediction:Prodigal:2.6"
/inference="similar to AA sequence:RefSeq:CAL34770.1"

```

```

/codon_start=1
/transl_table=11
/product="hydrogenase isoenzymes formation protein"
/protein_id="Prokka:DMACINML_00090"
/translation="MCLSIPSEILEIDELNNALVQTLGVKRKVNLDLIDEPLQKGDYV
LIHVGVAMEKIDKEAALESIKTYQEIVEKMNSGEIKSDEGDMGLNEFHR"
gene complement(84722..85471)
/gene="hypB"
CDS /locus_tag="DMACINML_00091"
complement(84722..85471)
/gene="hypB"
/locus_tag="DMACINML_00091"
/inference="ab initio prediction:Prodigal:2.6"
/inference="similar to AA sequence:RefSeq:AJP35105.1"
/codon_start=1
/transl_table=11
/product="Hydrogenase isoenzymes nickel incorporation
protein HypB"
/protein_id="Prokka:DMACINML_00091"
/translation="MCKDCGCSVNSAHTHEHSHHHDHHDHNSPLKESKTIEVISKILS
KNDEEAKHNRAHFNEANTLCINLMSSPGSGKTTLLESTIKALKNELKIAVIEGDLETN
NDALRVKNAGALAYQITTGQSCHLDAFMVHEALHHLDIKGVDLLFIENVGNLVCPASY
DLGEHLNVVLLSVTEGSDKPQKYPVMFKKADIVLITKADLAHHFDFDIKEATKLIKEL
SPRADIITLDAKNGTNMELWYKLLKLLKKELF"
gene complement(85548..87734)
/gene="hypF"
CDS /locus_tag="DMACINML_00092"
complement(85548..87734)
/gene="hypF"
/locus_tag="DMACINML_00092"
/EC_number="2.1.3.-"
/inference="ab initio prediction:Prodigal:2.6"
/inference="similar to AA sequence:RefSeq:CAL34768.1"
/codon_start=1
/transl_table=11
/product="carbamoyltransferase"
/protein_id="Prokka:DMACINML_00092"
/translation="MCRLGYKLQISGLVQGVGFRPLVFEELACELGLCGEVKNDGFGVE
IILACTKEECEHFYKLEKLPPLARIDSIDITEQTTTNYTHFSIGTSLQNTKTTPLM
SDFALCKECKKEFFDEKNPRFLYPFITCTHCGPRFSIIKNLPHYDRCNTTMEALKMCEF
CKSEYEDPKNRRFHAQPISCPQCKIDVFLKNKKGEILAQDDEAFKACAKLLKQGKILA
IKGMGGFHLMCDAFNLEAIKELRLRKNRPKPFALMCRDISDAKELCFVDKEEEKLLG
SILAPIVILKAKKAFSLIAPDVDKLGIMLAYTPLHLLLFYRFDGVLVATSANLSGESTI
IKDEDNLLKKGNVDFYLDYAREIHNPSDDSIQVVGKTMFLRTSRGLNPTYLEIK
SDKKGVFLALGSELKNEFVIFYENKLLISPYIGDLKSDVYERFFSLLDFFKQSYDLS
FDQILCDKHPNFSYTKEFYNTYKIQHHYAHFCALYFEYEKEFKKDEKALGFIFDGTGY
GDDGKIWGGEIFIGNLKQYERIVHFENFTLINSDIKNIQNLALSIIWHYDLEDAKTF
LSKIPKIKLENLKKIHTHSTLQTSSLGRIIDAFGSIVFDIEKISYEAQIGLMCEAFYD
ENLDFSYELFSKDGEINFKELIEGALKDEKSKAITGMFNALANLIITFSKAYDLKVL
GGGVFQNKTLQILKAKNFDLFLASLKYPNDSSIALGQMVHFLKKD"
gene complement(87715..89232)
/locus_tag="DMACINML_00093"
CDS complement(87715..89232)
/locus_tag="DMACINML_00093"

```

```

/inference="ab initio prediction:Prodigal:2.6"
/inference="similar to AA sequence:RefSeq:CAL34767.1"
/note="hypothetical protein Cj0621"
/codon_start=1
/transl_table=11
/product="hypothetical protein"
/protein_id="Prokka:DMACINML_00093"
/translation="MTLEFDFVYSADNDIFEYLLRFYAKNYRYTLEKQEDKYHFSIDA
DEENLKAFCDLSNSMSHSIFLKKFDVKAGEFHQQEVKDKDFPFTYLYLNSKLYQEK
KELSKNEWGVFCECEFSDDLNEFQSLNEDNFDKLNNTAFDLLLLKEKSIYLDKDKGIYE
ISLFKGFECDFLMPCDIKAINSVFVCSNENLKLKLLASLEKPLMKLRLSAVFRKNHDL
FNEFKLRLAQDLFSFALGLKLWQNEYKFLSVKKIKEFQKDFYITTLDNQIVVLEGF
INPRARELIFSKEKDNMARSYLLSRYGEKAFVLELSKEYEDLLLANKENLCLSLP
KNSKELYEEIQKDEIGARLLENFAKEFPLLNESFELKNNFYSLCLVGRVNLNDENLH
KAGEKLLKIADESKMPRGVKIDYRLKEDKSFYDTRTLRSTMSFMLAGVDSANIAYGAV
ESLAYFLRDYDDLREKKQSEMALISGSLFEHKALLRNTLKHLLKNCQLSDVPLRI"
gene complement(89279..89926)
CDS /locus_tag="DMACINML_00094"
complement(89279..89926)
/locus_tag="DMACINML_00094"
/inference="ab initio prediction:Prodigal:2.6"
/inference="similar to AA sequence:RefSeq:AAW35768.1"
/note="conserved hypothetical protein"
/codon_start=1
/transl_table=11
/product="hypothetical protein"
/protein_id="Prokka:DMACINML_00094"
/translation="MARQSSSVKSFYLRNDRFFYQIKNIKTLRLKLNKGEFHLSSIPQ
FYPLEKAKEFLYKNEIWIQKTYLNFQSKKARISENEIYFLGKKYILNLDESFKKTRIS
KGEIQSASREDLNFQNAKIIFSFYLKKWSKKTNLHYSHLSIKKMKTRWGSCNHKK
GYINLNLRLLEKNLRAIEYVILHELHSHIKFPNHSKEFYDFIYSFMSDFRQREKEF"
gene complement(89902..91218)
CDS /locus_tag="DMACINML_00095"
complement(89902..91218)
/locus_tag="DMACINML_00095"
/inference="ab initio prediction:Prodigal:2.6"
/inference="similar to AA sequence:RefSeq:CAL34765.1"
/codon_start=1
/transl_table=11
/product="putative MATE family transport protein"
/protein_id="Prokka:DMACINML_00095"
/translation="MAKKQLSLTKLSVPIFDLSSKYLTIINTAMVSHYSNSLVGAM
GAGNLIADLFITIFSFLSVGCSVIAQAIGARDLVLARKVIHQSLFLNALLGFVCAVF
IIWQGELLLRLANIPEEKLDGIIYLRMLGICLFFDALGIVLAAIIRVYNMAYWVMFI
GFLMDIIVIIGNFYALHFTQSELLGVGLSNLVARFVAVAALLIILFYKLIKHLKIQEM
IRLEKAVVKKVLNIGGFSAGENLLWIVQYFIAFSFVAKLGSNNDSVQTIYFQISMLIM
LIGQAISIANEIIVGKLVGAKYQNIAYKHAWNALYLSVMASAFVAVLNLFVKDFDTMDL
LDLKPELRELMLPLFTLSIFLEISRTFNIVMVNALRASGDAKFPFFSGLVFMGMVSLP
VGYVLCFHFGLGILGVWIGFCADEFRLRGLVNAYRWKSKKWQKALV"
gene complement(91603..93657)
CDS /locus_tag="DMACINML_00096"
complement(91603..93657)
/locus_tag="DMACINML_00096"
/inference="ab initio prediction:Prodigal:2.6"

```

```

/codon_start=1
/transl_table=11
/product="hypothetical protein"
/protein_id="Prokka:DMACINML_00096"
/translation="MSKKELYEKLIFAIIEGQEVNGVIQAIIRDGAEVDKEIVDIAYGFL
ESLEIEYADDKAFYAGCTAKNSDQDYIYRIVSRYAKGQKLDTIINTMFNRKTNPLKSK
GEIITPKNKRELKLMNKKRQYLGIDIDISNIKDFSELFTDVIRTDFFGGIELWDTNHVV
NMNRMFEKFNFSKIKSDSPLFDWISNMDTSNVSDMGYMFSSQSIGFNTDIGSWNTSNVL
NMSYMFLEAEDFNQINISAWDTSNVLCMVDMFHGAKRFKQINIDNWDVSSINKDYRATNA
KKYKFIDHENLCNYALYENCPTKPKWLMPCCKKENGKYPNTKLELILLAKDKNINLAD
VDISNINDLSLIFLHCERDFSGIESWNTSHVVNMSNMFAYSNMNQDISMWDTSKVAYM
DGMFQNTFPFNQINIDWNISNVKDLSSMFYCAEDFNQPLDKWDTSRVESMHYMFYRALK
FNQDIGLWNTSKVKDMNHMFSNAESFNQINNNVSNVKNMNGMFYTKKFNQPLDKW
DTGKVTNMASMFRRSSKRFNQNISWNVSHVKNFSYMFEEETEDFNQPLNGWDITGTTSL
AYMFSEAKSFNSPLNEWDTSKIKDMTGMFEETEKFNQPLSDWDVSNVETMHAMFSESK
SFNQDISSWNIKSIEDLSYFLHEAKAYTYSLSWRNLNAIDVDNYYIVEGTNIEEPTWY
ES"
gene complement(93945..94685)
/locus_tag="DMACINML_00097"
CDS complement(93945..94685)
/locus_tag="DMACINML_00097"
/inference="ab initio prediction:Prodigal:2.6"
/inference="similar to AA sequence:RefSeq:APU77476.1"
/codon_start=1
/transl_table=11
/product="phosphate ABC transporter ATP-binding protein"
/protein_id="Prokka:DMACINML_00097"
/translation="MIAKTTNLNLFYGGKQALFDINMQIEQNKITALIGASGCGKSTF
LRCFNRMNDKIAKIDGLVEIEGKDVKNQDVVLRKNVGMVFQQANVFKSIYENISYA
PKLHGMIKSKDEEEALVDCLQKVGLFEVVKDKLKQNALALSGGQQQRLCIARALAIK
PKLLLLDEPTSALDPISSGVIEELLKELSHNLSMIMVTHNMQQGKRVADYTAFFHLGE
LIEFGESKEFFENPKQEKTAYLSGAFG"
gene complement(94682..95770)
/gene="pstA"
/locus_tag="DMACINML_00098"
CDS complement(94682..95770)
/gene="pstA"
/locus_tag="DMACINML_00098"
/inference="ab initio prediction:Prodigal:2.6"
/inference="similar to AA sequence:RefSeq:CAL34761.1"
/codon_start=1
/transl_table=11
/product="putative phosphate transport system permease
protein"
/protein_id="Prokka:DMACINML_00098"
/translation="MKKLFKKRQKASKSFKRLCKMGLYINLIFLCIFLGSVAYLGIGA
FKQTYIYVEADRNSPAYELLSRAEQRKIRTGQITEKSWLLANSEVDQYMKQYNRLNE
EQRALVDNLVQKDEIALRFNTNFFLNGDSKSPENSGILSSAVGTLLVMLVCMASVVPV
GVAAAIYLEEFAPQNLFTHFIEVCINNLASIPSILFGLLGLGVFINLFGMPRSSALVG
GLTLAIMSLPIIIVSTKAALKNVDINMKNAAYALGMTKVQMVKGIMLPLAMPMILTGS
ILTLAIGETAPLMIIGMIAFIPDVASSVLDATSVLPAQIYSWSAMPERAFLERTAA
GIIVLLGLLVVLNLSAVLLRKYFQGKLK"
gene complement(95767..96681)
/gene="pstC"

```



CDS /locus\_tag="DMACINML\_00099"  
complement(95767..96681)  
/gene="pstC"  
/locus\_tag="DMACINML\_00099"  
/inference="ab initio prediction:Prodigal:2.6"  
/inference="similar to AA sequence:RefSeq:CAL34760.1"  
/codon\_start=1  
/transl\_table=11  
/product="putative phosphate transport system permease protein"  
/protein\_id="Prokka:DMACINML\_00099"  
/translation="MLKEKIIKFILFLCAFVSVVVSFAIMLTILIEALKFFQKESIST  
FLFSSEWAADAAFMNADGTSKQGVFGAVSLFWGTFYISLIAMLTALPLGVMCAIYLGV  
FAGKSKNYLKPILEVIAGIPTVVFGFFAAIIIVAPFIVWFFSLFGIQASFQSALGAGF  
IMGIMIVPIVASLSQDCIEAVSEKRINGAYALGMTKKEVFAVILPEAIPGIVAACL  
GLSRALGETMIVVMAASLRPNLTMNFLDMMTTVTKIVEALSGDQAFDSSLALSASFSL  
GLVLFIIITLIINMFSVYLINRFHKKRKNL"

gene complement(96691..97686)  
/gene="pstS"

CDS /locus\_tag="DMACINML\_00100"  
complement(96691..97686)  
/gene="pstS"  
/locus\_tag="DMACINML\_00100"  
/inference="ab initio prediction:Prodigal:2.6"  
/inference="similar to AA sequence:RefSeq:CAL34759.1"  
/codon\_start=1  
/transl\_table=11  
/product="putative periplasmic phosphate binding protein"  
/protein\_id="Prokka:DMACINML\_00100"  
/translation="MKKILALSVASFALAGALSAADLKIAGSSTVYPFTSFVAEEYAA  
IHNTKTPIVESLGTGGGFKVFCEGITDISNASRAMKFSEFETCKKAGVTDIVGIMVGY  
DGIVLAQNKANTPLNITKKELFLALAKEVPQGGKLVNPNYTNWNQINKNLPNRKISVY  
GPPSSSGTRDVEELVMSDISKKIPEYKGEYKTIRQDGAYIPSGENDNLIVSKLTIDK  
DAFGLFGYGFVSNVDKINAADIDGIKADEKNIADGKYDLARSLFIYINAKKNPKEAF  
EFAKIYMSDDLAKSGGELEKIGLVPLNELLKASQKHIEDRKILTDELVKAGKVF"

sig\_peptide complement(97624..97686)  
/gene="pstS"  
/locus\_tag="DMACINML\_00100"  
/inference="ab initio prediction:SignalP:4.1"  
/note="predicted cleavage at residue 21"

gene 98023..98523  
/gene="cft"

CDS 98023..98523  
/gene="cft"  
/locus\_tag="DMACINML\_00101"  
/inference="ab initio prediction:Prodigal:2.6"  
/inference="similar to AA sequence:RefSeq:CAL34758.1"  
/codon\_start=1  
/transl\_table=11  
/product="ferritin"  
/protein\_id="Prokka:DMACINML\_00101"  
/translation="MLSKKVVDLLNEQINKEMYAANLYLSMSSWCYENSLDGAGLFLF  
QHASEESEHARKLITYLNETDSHVELKEVKQPEQNFKSLLDVFEKTYEHEQSITKSIN"

DLVEHMLANKDYSTFNFLQWYVSEQHEEEALFRGIVDKIKLISDNGNGLYLADQYIKN  
LALSKK"

gene 98573..99949  
/locus\_tag="DMACINML\_00102"

CDS 98573..99949  
/locus\_tag="DMACINML\_00102"  
/inference="ab initio prediction:Prodigal:2.6"  
/inference="similar to AA sequence:RefSeq:CAL34757.1"  
/codon\_start=1  
/transl\_table=11  
/product="putative acyltransferase family protein"  
/protein\_id="Prokka:DMACINML\_00102"  
/translation="MTYFSLEFSILMIVFFAIYWAFKDNYKIQNILILAFSYLIYILI  
NPYFALILFIYFFIHFALLIFVRRKRYIFATCLTFIILNLCFFKYFPNIKGSLDQV  
LSFLGLDFLNIELILPIGISFYTFASITYLV DVYKHHLESFLNLATFLSFFPTLLAG  
PIMRSAFFFEQAYQKREFKHANLIIILLIFGIVKKVLIANYLGIYAKNILDFPQSYNF  
IQLLSAIYAYAVQIYCDFSGYVDLVCAFALMLGFTLPPNFNMPYLAKNLKEFWARWHI  
SLSTFIRDYIYIPLGGNRKGMPTIANILIAFILSGLWHGSTLAFGLWGLLHGLGIVF  
IHLLALTKFSLQKIPALGRFLTFQFVCFTWIFFYFNKNLEDALEYFKACYNFFQIPS  
YNDIYMLVSFAVLFMIYPLFVNFREYCVKILNLTPFLLPFVITFILLLVFAFMPNGI  
PDFIYSSF"

gene 99950..100930  
/locus\_tag="DMACINML\_00103"

CDS 99950..100930  
/locus\_tag="DMACINML\_00103"  
/inference="ab initio prediction:Prodigal:2.6"  
/inference="similar to AA sequence:RefSeq:CAL34756.1"  
/codon\_start=1  
/transl\_table=11  
/product="putative periplasmic protein"  
/protein\_id="Prokka:DMACINML\_00103"  
/translation="MKIIRFFFILIIIVFILVCLVMNQSIFS YIEQKYHFAFYPKNDIL  
QEANGFKNKLEQIRAILSNEPLPQNI EENIMVQEDMDELNASNDFIDKNTTIEDIQQT  
EDENVSFIDNTKLEIHKGDEF LF IGDSL MQGVAIALNRDLIDLGLKANDLSKQNTGLS  
YKSYFDWAKATKEAFKPNIKYLVVLVGANDPWDIKKGGVYHRFGSDSWIDIYTYRV  
NEIINIQAQHNAKILWFVPPVKDELNEKIQLNKIYSEEILKNKQIFINTKLF FSV  
NDEFSTYIKNENNKSVKMRTDDGIHFTPNGAKEMSKLLEHITIKEENAN"

gene 100920..102089  
/locus\_tag="DMACINML\_00104"

CDS 100920..102089  
/locus\_tag="DMACINML\_00104"  
/inference="ab initio prediction:Prodigal:2.6"  
/inference="similar to AA sequence:RefSeq:CAL34755.1"  
/codon\_start=1  
/transl\_table=11  
/product="putative periplasmic protein"  
/protein\_id="Prokka:DMACINML\_00104"  
/translation="MQIKQFKAILLILIFSINLYANNTNNIIDEILNQTKNQSALSNY  
ASKKDLKILEQKLDQKNIGIRIYIGDSHTAADFFPRVIRGYLIKSN SIGFAYPLQPKY  
QQNLNLDYSYKNYEILNSRNTDTAGIDFPLGGIIAKAKEKGAKITLDTNLDKCKFKVG  
FVFKAQNTNAFSIKDAQNKSYELRSVANKWSYKEYELVFLQISALQKNAQLGGYFI  
TSKEDNAYLDTIAINGAKSDLWMSWNKKVSEQELKLLSNDLILLAYGSNDALFKGF EK  
NKFKNLKDWIRTLKTYNKNALIMLVSPPTVVKKQGKNYTLAPDFFAIRQALYEVAKE  
EKTLLFDMHQFMQDSGGKKNWIEQKLSLQDVHLTIKGYELMAKLLDLDLKKYVHY"

sig\_peptide 100920..100985  
 /locus\_tag="DMACINML\_00104"  
 /inference="ab initio prediction:SignalP:4.1"  
 /note="predicted cleavage at residue 22"

gene complement(102159..103523)  
 /locus\_tag="DMACINML\_00105"

CDS complement(102159..103523)  
 /locus\_tag="DMACINML\_00105"  
 /inference="ab initio prediction:Prodigal:2.6"  
 /inference="similar to AA sequence:RefSeq:CAL34754.1"  
 /codon\_start=1  
 /transl\_table=11  
 /product="putative outer membrane efflux protein"  
 /protein\_id="Prokka:DMACINML\_00105"  
 /translation="MKNLLSILLAFFLSACGVKLSLPKEPTMSEESFKDLNITYDWYK  
 AYDNAKLNFLNFVLLNNSDINTARSTLLAALARADLIDYDLYPTLSANLGLGGDKKL  
 NSGVQSKNFNNSLNLSELDIYGKIRDSSSEFSAKASAYDLENLKISMINTALNGV  
 FELAYFNDVDNLLKEYLANLEQMRELYAYKFELGKIEELDLNIEQNLLRAKQNLLRN  
 EQNRNLLIKNLQDLIGKQEGFAYIDYFKALTLSDFKNLNPFNIPLEALVYRPDVRSK  
 LNTLKSFAKDYASVQKSILPSISLNGALNGSDKQFDDSFKEVLSGNIKISLPFLDYG  
 RVKQNIKISQFDYESTLITYEQLQSAMNEFALNYKDYQSNTMLLQILKDTSEFKQELI  
 TQAYWEKYNLGKSELKDYLDASNTLNSTKQSLLEARFNLLKTINSYYQITALSYDETH  
 LEMP"

gene complement(103525..105450)  
 /locus\_tag="DMACINML\_00106"

CDS complement(103525..105450)  
 /locus\_tag="DMACINML\_00106"  
 /inference="ab initio prediction:Prodigal:2.6"  
 /inference="similar to AA sequence:RefSeq:CAL34753.1"  
 /codon\_start=1  
 /transl\_table=11  
 /product="ABC-type transmembrane transport protein"  
 /protein\_id="Prokka:DMACINML\_00106"  
 /translation="MIFLNNICKNIGENAILKNVLSLSIEKGEFVAIIIGQSGSGKTSLL  
 NIIGTLDEPSNGSYIFDNYEVTQLNSDEKARLRREKIGFIFQRYNLLNLLSANDNVTL  
 PAVYAGKKVQERNFRAQELLGNLELEHKIESKPNELSGGQQQRVSIARALMNGGELIL  
 ADEPTGALDSKSGIMVLEILKKLNAQGHTIVLVTHDPKIAAQAKRVIEIKDGEILSDS  
 KKDKFAYQGQVKSMPEKKTFTLFKNQAFECKIAYSSILAHKLRISILTMLGIIIGIA  
 SVVCVVALGLGSQAKVLESARLGTNTIEIRPGKGFGLRSGKTRLNFSDLLETLRSLD  
 YLEAVDAHSNTSGVATYTNISLSARAEGVGVNFAIEGLKLQVGRILNNEIDIETNAV  
 AVLDFNAKRNLFPHQKSEDLGRVVFNSQPFIIGVLQKDTEKPIEDNVVRLYMPYT  
 TLMNKLGTDRNLREIIVKVKDDVSSTLAENAIIRILEIKRGQRDFFTFNSDTFKQAIT  
 ANKRTTITL TASVAVIALIVGGIGVMNIMLVSVSERTREIGIRMAIGARREDIMMQFL  
 IEAVMICSMAIGVLLSIFVIFGFNTLSTDFPMVLNAYSVLLGLLSSVLIGVVFVGF  
 PARNAANLNPIALSKE"

gene complement(105450..106625)  
 /gene="macA"

CDS complement(105450..106625)  
 /gene="macA"  
 /locus\_tag="DMACINML\_00107"  
 /inference="ab initio prediction:Prodigal:2.6"  
 /inference="similar to AA sequence:RefSeq:SQE24135.1"  
 /codon\_start=1

```

/transl_table=11
/product="amidohydrolase"
/protein_id="Prokka:DMACINML_00107"
/translation="MKNKIVLIVVILALFGVGAYFVFFNNGEKINYLTQKVKKINISQ
TIEAVGKVYAKDQVDVGAQVSGQIIKLYVDVGSYVKQGDLIAQIDKDKQNDLDITKA
QLESAKANLESKKVALEIASKQYQREQLYAAKASSLENLETQKNNFYTLKANVAELN
AQVVQLEITLKNAQKDLGYTTITAPIDGVVINAVVDEGQTVNANQNTPTIVRIANLDQ
MEVRMEIAEADVGKIKIGTELDLDFSLSDPQKTYQASIASIDPDTQISDSSTNSTSSS
SSSSSSSSSNNAIYYYAKFYVANKDDFLRIGMSIQNEIVVASVKDVIAPPTYTIKNDK
KGYVVEILQGQKAVKKYVKLGKIKDSVNTQILEGLSEDELLIVSSSGSDAAPKLRLRF"
gene complement(106708..107898)
CDS /locus_tag="DMACINML_00108"
complement(106708..107898)
/locus_tag="DMACINML_00108"
/inference="ab initio prediction:Prodigal:2.6"
/inference="similar to AA sequence:RefSeq:CAL34751.1"
/codon_start=1
/transl_table=11
/product="putative amidohydrolase"
/protein_id="Prokka:DMACINML_00108"
/translation="MLERVKNLSDKYEYKIVNLRHQIHMHEPELEFEEENTARLVCEIL
DEFGIKYEKNIAKTGILASIEGKKQSTKKPQCVLLRADMDALPVQEQTNLASYASKING
KMHACGHGHTAGLLGAVLILNELRDEFSGTIKFMFQPAEEGSGGAKPMIEAGILENP
HVDVAVFGCHLWGPLLNTAQIVSGEMMAGVDVDFLEFIGKGGHGAHPHTTIDPIVMAS
KFVSDVQCIISRRLRPVDAGVITIGKFHAGTTFNVIPQNAILQGTVRFLSDENQKLLQ
SSIENTAKAVALEFGGDFKLDYKREYPLINDENAACKIARKAFSKVLGEQNIISVAKP
DMGAEDFAFLTRRMGAYVFGISKDLKNPTLHHSSTFCWEDENLKVLMQGDSSMMAL
EFLNS"
gene complement(107903..108784)
CDS /locus_tag="DMACINML_00109"
complement(107903..108784)
/locus_tag="DMACINML_00109"
/inference="ab initio prediction:Prodigal:2.6"
/inference="similar to AA sequence:RefSeq:ADC28217.1"
/codon_start=1
/transl_table=11
/product="putative polyphosphate kinase"
/protein_id="Prokka:DMACINML_00109"
/translation="MQEKVPAKIQEDTKKDEIYVSIKKKKSTIEYEKDLKLNQIELLK
FQNYVKAKGLKVLILIEGRDAAGKGGAIKRLIEYLNPRGCRVVALEKPNQVEKTQWYF
QRYVTHLPSAGEIVIFDRSWYNRAGVEPVMGFCTPQQHKDFLREVPLFENMISNSNL
MFFKFFYFVSKEEQRRFEKRRIDPLKQYKLSVDPQKSQELWDKYTLAKYSMLLASNTP
TCPWTIISDDKKARLNLLRFILSKVDYADKKIGDFSKIDQLVRSGEIEIRKMEAN
LEKIDNKKADEKIKDLD"
gene 108879..110579
/locus_tag="DMACINML_00110"
/EC_number="1.8.1.8"
/locus_tag="DMACINML_00110"
/EC_number="1.8.1.8"
/inference="ab initio prediction:Prodigal:2.6"
/inference="similar to AA sequence:RefSeq:CAL34749.1"
/codon_start=1

```

```

/transl_table=11
/product="putative thiol:disulfide interchange protein"
/protein_id="Prokka:DMACINML_00110"
/translation="MRFIFTLFSCYFLFASVLSLNEAFEVKSSSYDSAVSIDIKLGK
DIYLYSDKLLYINQNDISHLINLPPSTQRLNEKVYYQDLNLALPSLLLERFAQSQNN
QIKLEFQGCSEQGLCYNPQTWYFDLKHKDKNFEISAPYKEKKKTLQVKSEESMIANFL
ATDKLFWILLSFLGYGLLSLTPCILPMIPISSLIVAKSETKFSKKHSFFLSFIYVF
SMSLAYAIAGVIASFLGASVQGLLQKPSVLIFFALIFVLLALAMFESFRFELPLKFQN
FLHKKSEKGGKVLGVALMGFLSALIVGPCVAAPLTGALIYIANTGDALLGASALFVMS
FGMGIPLLFIGLGLGFLKAGAWMQVKIFFGFVMLAMAIWILSRIIETRYILIAFGIL
GVFFSVFMGIFEQAFSVITKIKKSLILVLAYSLSIFLGGIFGAKNFLNPLNLSNTL
LNSSKLNYNFINDLNALQKEIKTSTRPIMFNFTASWCENCKLDELTFSDKEIQEKLK
NFHLIKIDLTQNSDKDLEIMKEFGVFGPPVLIFFENGKENLRITGFISADDLLQKLTK
"
sig_peptide 108879..108929
/gene="dsbD"
/locus_tag="DMACINML_00110"
/inference="ab initio prediction:SignalP:4.1"
/note="predicted cleavage at residue 17"
gene 110576..111244
/locus_tag="DMACINML_00111"
CDS 110576..111244
/locus_tag="DMACINML_00111"
/inference="ab initio prediction:Prodigal:2.6"
/inference="similar to AA sequence:RefSeq:CAL34748.1"
/codon_start=1
/transl_table=11
/product="MOSC-domain containing protein"
/protein_id="Prokka:DMACINML_00111"
/translation="MKIKSLQIGHIKDYGGFKSAFIKNIYLKEVDIDFSGIINDNIAD
TKHHGGKNKALFANSYHNYPLWENFLGKKLECGMMGENLTLENLHEQNVICIGDIHRFE
DAILQVSEPRKPCVKISKIHHNPFTQEIFKTGLSGWYYRVLEGRKIHAKSKIQLIER
NPINLSVLELNHLFYNP HQALKQNPTLLEKLSKLDTLISQNW HETIQKRLKNTYDLNY
MQNL"
gene 111295..112638
/locus_tag="DMACINML_00112"
CDS 111295..112638
/locus_tag="DMACINML_00112"
/inference="ab initio prediction:Prodigal:2.6"
/inference="similar to AA sequence:RefSeq:CAL34747.1"
/codon_start=1
/transl_table=11
/product="putative sodium-dependent transmembrane
transport protein"
/protein_id="Prokka:DMACINML_00112"
/translation="MQRQTSSTLYILT VAGATIGFGATWRFYPYLVGENGGGAYVLV
FCIAMILIGIPVILAENVIGRKSMTNSVDAFEGKWKFIGYMGLLGSFGIMAYYMLGG
WVFVYVFELIIGNFNLSHTVTKDFTEQFFNEKISFNPLGVGIFTTLVFLINYIILRRG
IIDGIEKSVKFLMPLLFICLILVVRNLSLEGAMNGVKFYLTPDFDKILSRKLLIDVL
GQVFFALS LGFVMITLSSHLSKNENMKTAIYTGVLNTLIAVLAGFMIFPALFAAGL
EPDKGPSLVFQTLPIAFSHIHFGTIICILFFILLLIAALTTSLPIYQVIISVLEEKFK
LSKKTAINLTLGSIFILGNIPCILTYGWRDITLVKGKNIFDSFDFISGNILFVLTAF
FCCIYVGWVLGKEQSIKELSNEGKLSVGFKIWFYIYKFIIPLIILTIIFYGVNTN"
gene 112926..114188

```

CDS /locus\_tag="DMACINML\_00113"  
 112926..114188  
 /locus\_tag="DMACINML\_00113"  
 /inference="ab initio prediction:Prodigal:2.6"  
 /inference="similar to AA sequence:RefSeq:ADT73021.1"  
 /codon\_start=1  
 /transl\_table=11  
 /product="Major outer membrane protein"  
 /protein\_id="Prokka:DMACINML\_00113"  
 /translation="MKLVKLSLVAALAAGAFSVANAAPLEEAIKDIDVSGVLRVRYES  
 GRFGKDLNLVNGSSLNTSKQECHKYRAQLNFSGAIADNFKAFVQLDYNSKDGQGVVDSI  
 SNTSDTLNVRQLYLYTDENVATSVILGKQQLNTIWTDNAIDGLVGTGVKVVNNSIDG  
 LTAAFAVDSSNEAVHTTTNPKGDTDASPFLNWNKNIYGGAAVGSYEVFNGQLNPQLW  
 LAYMTDNAFLYAVDAAYSTTIFDGVNWTLEGAYLGNLSDNELKDAGFGNGNF FALNGG  
 IEVNGWDATLGGLYYGKKDKGTVTVIEDQGNIGSLLAGEEIFYTQGSQNLNGDIGRNIF  
 GYVKAGYTFNETVRVGADVFYGGTKTDSTVTGHAGGGDKLEAVARVSYKYSPLNFSA  
 WYSYVNVNDNGDQGEQDHNTVRLQALYKF"

sig\_peptide 112926..112994  
 /locus\_tag="DMACINML\_00113"  
 /inference="ab initio prediction:SignalP:4.1"  
 /note="predicted cleavage at residue 23"

gene complement(114328..115452)  
 /gene="dnaJ-2"

CDS complement(114328..115452)  
 /gene="dnaJ-2"  
 /locus\_tag="DMACINML\_00114"  
 /inference="ab initio prediction:Prodigal:2.6"  
 /inference="similar to AA sequence:RefSeq:EAQ72629.1"  
 /codon\_start=1  
 /transl\_table=11  
 /product="co-chaperone protein DnaJ"  
 /protein\_id="Prokka:DMACINML\_00114"  
 /translation="MELSYEILEITQSADKDTIKKAYRKMALKYHPDRNQGDKEAED  
 KFKLVNEAYEVLNNEEKRAIYDRYGKDALKGGGFGSGGAGFGGFEDLGDIFSSFFGGG  
 FGGSSQRRKKSDEKFAELVNLKLTKEAVFGCKKNIDFTYKSSCKTCSGTGAKDG  
 KLQTCPKCKGRGQVGISQGFITFAQTCPCDKSGESASEKCKDCKGRGYEELKDSVEV  
 NIPEGIDNGMNLVAAKGNLSKSGNRGDLVYKVIVEEDDTFIRDDEDIYIEFPVFFFTQ  
 AILGQSIKVPTIRGEATLNLPKGAKDGQRFVLEREGVKDVHSSRIGNQIVQIAIKFPN  
 SLNDEQKELLEKLSSEFSGIKDGMHHEQKGLFEKITHWFKS"

gene 115598..116269  
 /gene="racR"

CDS 115598..116269  
 /gene="racR"  
 /locus\_tag="DMACINML\_00115"  
 /inference="ab initio prediction:Prodigal:2.6"  
 /inference="similar to AA sequence:RefSeq:CAL35376.1"  
 /codon\_start=1  
 /transl\_table=11  
 /product="two-component regulator"  
 /protein\_id="Prokka:DMACINML\_00115"  
 /translation="MINVLMIEDDPDFAQLLSEYLTQFNKITNFENPKEALNVGIQG  
 YDCLILDLTLPIDGLEVCREIRQYNIPIIISSARGDLSKVVVGLQIGADDYLPKPY

```

DPKEMHARIMSLIRRTKRAENTSNENINSAFKIDERKHEITYQNKVLTLP AEYEILE
YLIQQHGYSVSREQLVSRCKNLKDKDSKSLDVIIGRLRTKINDSSKSPKHIFSVRGIG
YKLIIG"
gene      116266..117516
          /gene="racS"
          /locus_tag="DMACINML_00116"
CDS      116266..117516
          /gene="racS"
          /locus_tag="DMACINML_00116"
          /inference="ab initio prediction:Prodigal:2.6"
          /inference="similar to AA sequence:RefSeq:CAL35377.1"
          /codon_start=1
          /transl_table=11
          /product="two-component sensor (histidine kinase)"
          /protein_id="Prokka:DMACINML_00116"
          /translation="MTKNYSIYTKLVILFVVTFFLVCVLFIVLLKIESNTYSEEEGFK
QESFIKNIINSYGNSGVDIGAHLNNSGFVAIQNDYFAKIARIDGQNLFRAGNGENSC
TLSSLKYQNKLYLDVQCKDFNALFEEDTNNRVYNLLLIGFFFFSFLVVFMYFVSVLKS
EPLKLRQVAEVANGGKPDFENYQQDEVGKIAFEFQKAFKKNQELIQSRQLFLRTIM
HELKTPIGKGRIISEMLKEEKQKERLIDIFLRMDSLINFAKIENLFSKNYNLQFKPV
HFSTILNEAKDYLMRDFNKVVKLNLKHDALINVDMEIFPLILKNLIDNALKYSSNGT
CELYCCKEFCVIKPNPGLSEPIEHYFEAFTREPYQVKVGMGLGLYIVFEVCKLHNFD
IIYFYEEGKHCFKIFFGVKTNNDT"
gene      117506..118081
          /gene="recR"
          /locus_tag="DMACINML_00117"
CDS      117506..118081
          /gene="recR"
          /locus_tag="DMACINML_00117"
          /inference="ab initio prediction:Prodigal:2.6"
          /inference="similar to AA sequence:RefSeq:CAL35378.1"
          /codon_start=1
          /transl_table=11
          /product="recombination protein"
          /protein_id="Prokka:DMACINML_00117"
          /translation="MTHKGVEKFNELVESFANLPTIGKKTAIRLAYHICTANQLEGMK
LAHNIENAIRFIKPCQCGALSENELCEICTDEERDKNFLCIVQSPKDVLVIEESKSY
GGLYFVLDDLNDEKLAQLRQMILKLQSKELIFAFTHNLNSDAMIFYIEDKLDLNLQF
SKIAQGIPSGVNLNVDFISLNKAINFRTKV"
gene      complement(118083..118583)
          /gene="hydD"
          /locus_tag="DMACINML_00118"
CDS      complement(118083..118583)
          /gene="hydD"
          /locus_tag="DMACINML_00118"
          /inference="ab initio prediction:Prodigal:2.6"
          /inference="similar to AA sequence:RefSeq:CAL35379.1"
          /codon_start=1
          /transl_table=11
          /product="putative hydrogenase maturation protease"
          /protein_id="Prokka:DMACINML_00118"
          /translation="MFADEGIGVHLCKLLEKKNYKFTHPNHSLNFVDGGTLALQLSYII
AEYDKMIVLDCIDADNSKIGDVFFFYPYDAMPKKINWSGSAHEVEMLQTLQYMELMGDL
PPTQILACVPKRIKPMFSTLSQEIVSAGKIMEKTLLEYLAKEGFSYEKIANHSLQELA

```

DISYKN"  
 gene complement(118613..119305)  
 /gene="hydC"  
 /locus\_tag="DMACINML\_00119"  
 CDS complement(118613..119305)  
 /gene="hydC"  
 /locus\_tag="DMACINML\_00119"  
 /EC\_number="1.12.5.1"  
 /inference="ab initio prediction:Prodigal:2.6"  
 /inference="similar to AA sequence:RefSeq:AAW35720.1"  
 /codon\_start=1  
 /transl\_table=11  
 /product="quinone-reactive Ni/Fe hydrogenase, cytochrome b subunit"  
 /protein\_id="Prokka:DMACINML\_00119"  
 /translation="MQNKEEKLQRKAIEYEFISIGLRLTHWVRAFAIVILVVTGYLSYV  
 FQNPVSNQEPVNFQAKYRMVHQAVGFVLIACVIFKVYLFDFDKISRKERISIAVDLNL  
 PKLWIEQIKFYLFGLKHPHLKGVYNPLQFVTYVFFYIVMVGIIITGLILYTHTYHEGL  
 GLLYEVLRLPLEAALGGLADVRTYHRILMWVILIFVPVHIYMAFFNAIKGKDGAI  
 VSGYKFKVEEKN"  
 gene complement(119316..121031)  
 /gene="hydB"  
 /locus\_tag="DMACINML\_00120"  
 CDS complement(119316..121031)  
 /gene="hydB"  
 /locus\_tag="DMACINML\_00120"  
 /EC\_number="1.12.5.1"  
 /inference="ab initio prediction:Prodigal:2.6"  
 /inference="similar to AA sequence:RefSeq:CAL35381.1"  
 /codon\_start=1  
 /transl\_table=11  
 /product="Ni/Fe-hydrogenase large subunit"  
 /protein\_id="Prokka:DMACINML\_00120"  
 /translation="MSQKIIIVDPITRIEGLRVEVVVDDNNVVKEAYAGSTLWRIET  
 IVKGRDPRDAGFMTQRICGVCTFSHYKAGIVAVENALGITPPLNALLTRTLMNAALFL  
 HDHIVHFYQLHGLDWADVVSALSADVKKASDEAFKYTSMPYATGADKLLLEVQRLKTF  
 VDKGNLGPANAYYGHPTYRLSPEQNLIVLSHYLECLRIQRIIAQCMAIFGAKNPHPQ  
 SLTVGGVTCVMDLLSPARMGEYMEKFKEVQDFVNRAYYVLDVMAGKAYANEPSVLNDI  
 GVNLYTFQEFQLGRDEWLFESGIIKNGDLSKVYEVEEDKITEEATHSWYADNEPLHP  
 YDGKTNPNYTGLEVESVDHHGNTVHVKVFDTKGKYSWIKAPRYEGNPMQVGPLANIV  
 VNYAKGNQNVVPVDFLKETGLPLNAVFSTLGRTAARCLEAKIVANNALKAFRNLVE  
 NLKVDESTCAPYVIDNSKEYKGRYMGHVPRGTLSHWCRIKNGVIENWQAVVPSTWNAS  
 PKDANGVGGSYEQCLIGLKIADVQPLEIIRKIHSYDPCIACAVHVMMDTKGNNLSEYK  
 INASL"  
 gene complement(121037..122176)  
 /gene="hydA"  
 /locus\_tag="DMACINML\_00121"  
 CDS complement(121037..122176)  
 /gene="hydA"  
 /locus\_tag="DMACINML\_00121"  
 /EC\_number="1.12.5.1"  
 /inference="ab initio prediction:Prodigal:2.6"  
 /inference="similar to AA sequence:RefSeq:CAL35382.1"  
 /codon\_start=1



```

/transl_table=11
/product="Ni/Fe-hydrogenase small chain"
/protein_id="Prokka:DMACINML_00121"
/translation="MIDYNQIESRLSALÉKLPSPNPENSIPKALERSGFTRRDFMKWA
GAMTAFLALPASFTPMVAKAAELADRLPVIWLHMAECTGCSESLRSPTIDSLIFD
YISLEYHETVMAAAGWQAEENLESAIEKYKNKYILMVEGGIPMGDTEKFLTIGPHGKS
GYELSKVASENALAIFAIGTCSSFGGIQAARPNPSNAQPLSKVTSKTVINVPGCCPSE
KNIVGNVLHYLLFGELPALDVYNRPKWAYGLRIHDL CERRGHFDAGEFVQNF GDEGAK
NGYCLYKVGCKGPYTFNNCSRERFNQHTSWPIQAGHGCIGCSEPNFWDTMGPFEEPMAS
SRKFDTVFLGADNVSDKIGIGVLT LTGVAIAAHAVIASMKKNEE"
gene complement(122308..124143)
/locus_tag="DMACINML_00122"
CDS complement(122308..124143)
/locus_tag="DMACINML_00122"
/inference="ab initio prediction:Prodigal:2.6"
/inference="similar to AA sequence:RefSeq:CAL35383.1"
/codon_start=1
/transl_table=11
/product="putative FAD dependent oxidoreductase"
/protein_id="Prokka:DMACINML_00122"
/translation="MKKANLIFKDNTPFSLDFDDFYFNSKDGLNESKFVYSEAFEFKE
NDTFIIAESGFGIGLNFLLTLKRFLQAKRPPKLFYVSVEGFYIEKDKLREIYHKLGF
YEEFKEILEAFLKFYPKAKKGYRFRYFKDCFLDLIFDDIAVLSELDNFADVWFLDGF
PSKNSAMFDENFIAQVARLSKIDTQICTFSASSILQKNLIKYGFEVQKTKGFRKREMI
KAFLRKENPILDKEAYFQRIPSLYKNKKVAIIGSGICGATLAYELSLRDFEVSVFEN
DSLGCASGNESGILSSILKPDVALGEFSQLAFIEASRFYKQILNLLNNGVIEFAHT
PLMQERFISQKDNVLFKIDKNEAFLEDGGHIKPKKILKSLFEKSQAKMYFNHEYDFQ
HQEDKFTLHFKNQKAIQDFDILYAMGADTKDFLVYDGMLLSKVRGQVTHLKPFLDNA
FALSSKAYICPSDGLQVIGASYDRLNSNPHQKADDEENLQNIQEF LKGD E E I I K G
SRVGFRSYSSDRFAIVGAAYDEAFYKQEYKALLWTKNKTQTLQNIPLNLYLNFAGHSR
AFSTSVLAARYLCALINEEPLGVFKKFIPCIHPARFLIRKLLKGI"
gene complement(124140..126110)
/locus_tag="DMACINML_00123"
/locus_tag="DMACINML_00123"
/EC_number="3.5.1.28"
/inference="ab initio prediction:Prodigal:2.6"
/inference="similar to AA sequence:RefSeq:CAL35384.1"
/codon_start=1
/transl_table=11
/product="N-acetylmuramoyl-L-alanine amidase"
/protein_id="Prokka:DMACINML_00123"
/translation="MLRILVFCIALFSICFGVYENELANFDKNFIMSKNDAQVKFHHQ
LKS LYIQSVINEDEKTKIEILKRLIISSNALNLDDKSYANELEESGVSKASINALRKA
VIQDKQLQSSSKNVELSSFDPPKSTPKPQQAKQEI VKTQNNKPQQTKKVKDQVYVLS
SKTSQGVVLDLNTNLEQEDIKSFALDEKGNRYRISDFEGVLEGGRKEYKFDDYRIVIS
QYNPKTIRIVAYAKEKIPIEFD FEDEKINISKKSQPVQKNISAKQETKTAVKKE SDKV
VAKQEPKQVKTQEAKTNTKKEQADDEPLYVLDVDKSSNSVVLNLSDELDEKDITSFST
KDQKFFRQVVSFQGI LEGSRKNFTFGQNAVTVTQYNPKTVRIVLSSPKEFKLFKELDG
KNLTLGFGGSVSKNTSVSSKSTSKTSNKNVLSNFKSDKLI VLDAGHGGKDSGALSDK
KGT LKEKDIVLSTTLKLGNELK KRGYKVL YTRSSDKF INLRDRTKYANDKRADLFLSI
HANAAPSASRAKSSEGVETFFLSPARSERSKKA AEKENQGDFEEIN YFSKQSILNFLN

```

REKIVASNKLAIDVQKNILTQTRKKYKIVDGGVREAPFWVLVGAQMPAILIEIGYITH  
 PSEGKRIANKSFQDTLVKGIADGVENYFYNNR"

gene complement(126110..127201)  
 /locus\_tag="DMACINML\_00124"

CDS complement(126110..127201)  
 /locus\_tag="DMACINML\_00124"  
 /inference="ab initio prediction:Prodigal:2.6"  
 /inference="similar to AA sequence:RefSeq:CAL35385.1"  
 /codon\_start=1  
 /transl\_table=11  
 /product="putative 2-nitropropane  
 dioxygenase, oxidoreductase protein"  
 /protein\_id="Prokka:DMACINML\_00124"  
 /translation="MSLKSLQIGKHTIKYPIFQGGMGLGISWDKLASAVSLNGLGII  
 SSVGTGYENRTHISKELNAKPYGSENFYSREGLQTLINNARKVCGDAPLGCNILCAS  
 NDYARIARDACEVGFNVIVSGAGLPTNLPEFTADFPDVALVPIISSPKALKIICKRWQ  
 SRYNRLPDAVLEGPKSGGHQGFYEQCLDPNYQLENLIAPVVEEAKNWGSFPVIAAG  
 GIWDKKDIENAI SLGASGVQMGRFIGTFECDASDEFKNVLLACKNEDI ELIKSPVGY  
 PARGVRTNLLDLVDKRMGPKINCISNCVAPCGRGKEATKVGYCIADRLFDAWSGKKE  
 GLFFTGANRYRLEKLISVKELMDKLVNGE"

gene complement(127198..128403)  
 /gene="tyrS"

CDS complement(127198..128403)  
 /gene="tyrS"  
 /locus\_tag="DMACINML\_00125"  
 /EC\_number="6.1.1.1"  
 /inference="ab initio prediction:Prodigal:2.6"  
 /inference="similar to AA sequence:RefSeq:CAL35386.1"  
 /codon\_start=1  
 /transl\_table=11  
 /product="tyrosyl-tRNA synthetase"  
 /protein\_id="Prokka:DMACINML\_00125"  
 /translation="MDIKNILAEIKRGCAEIIIDEERVENLIKNYEYKGENFFVKAGFD  
 PTAPDLHLGHSVVLTKMAYLQKHGAIVQFLIGDFTGQIGDPSGKSVTRKKLDKEQVLK  
 NAKTYEEQVFKILDQPQTQLKFNSQWLNELGAAGIVELTSTFSVARMLEDDFTKRFK  
 EQSPISICEFLYPLLQGYDSVALKCDIEMGGTDQKFNLMLGRTLQRIYNTGKEQAVMM  
 MPLLEGLDGVNKMSKSLGNYIGVTEKANDMYAKILSISDELWRYEYELLSTKSLEEIE  
 NMKKEISSGNLHPKLAKENLAL EITARFHNEESAKAAKAEFDSVHSGNALPSDIKEFE  
 IQGEIWLAKALVECGLNSTSAARRSINANAVSVNSQKVSDEQMQLSAGEYILQVGKR  
 KFAKLVNI"

gene complement(128419..130614)  
 /gene="spoT"

CDS complement(128419..130614)  
 /gene="spoT"  
 /locus\_tag="DMACINML\_00126"  
 /EC\_number="3.1.7.2"  
 /inference="ab initio prediction:Prodigal:2.6"  
 /inference="similar to AA sequence:RefSeq:CAL35387.1"  
 /codon\_start=1  
 /transl\_table=11  
 /product="putative guanosine-3',5'-bis(diphosphate)  
 3'-pyrophosphohydrolase"

```

/protein_id="Prokka:DMACINML_00126"
/translation="MKPVDEELLEKLIEDIKNCRDLTRAKELLSICQEDAIVEKAV
DYIKSHEGQVRKSGEPYAVHPILVASLVAFLSENKATILAALLHDVIEDTQCTEEL
RDQFGSEVLKLVGLTKIVEIREDNLIPSKSKSLTKSALTRNMLLASIEDVGVLVV
KLCDRLHNMLTLDALREDKQKRISEETLVVYAPIAHRLGISSIKNYLEDLSFKYLMQ
EYKIDNYINSNDQMQQLGNEFISKIELFLSNGFRQGSFQIQKRKHSYSIYLKMQ
RKGVGIEEVLDDLGVRIILVENVSDCYLALGVLHTNFNPLVSRFKDYIALPKQNGYQTI
HTTLFDTKNIIEAQIRTFDMHKIAEFGIAAHWKYKEDGSVAPRLDWLADISMQSTNN
LENAEDYNAIELYEYAKDSLYVEDVAVYSPKGEIFTLPRGATVLDFAVEVHTKVGLHA
KSAYVNRVKVPLLTELKNGDIVRVVTSNDRFYRCSWVDSVKTGKAKASIREFCKQKMR
EINLLSAINMLSFIFSVDKNKIENWIEKENLGRIRQVSDSAYLKDIVNGLKKYAKK
SYWFDKYEIKEQKIGNFLLYSNHKIANVDFDYCCHPKRGDAVLAFIENGNAIVHKKLC
DRADKMIDNNKDMVLIKWDSNIPKSYKLIFSLENKKGILAEFLAVLAKMQINLLTISL
SSDTNTVVDYFEITIEIPDNINPDNRDLKSYCKILDFTSLNDAYKEA"
gene complement(130598..130822)
/gene="rpoZ"
CDS /locus_tag="DMACINML_00127"
complement(130598..130822)
/gene="rpoZ"
/locus_tag="DMACINML_00127"
/EC_number="2.7.7.6"
/inference="ab initio prediction:Prodigal:2.6"
/inference="similar to AA sequence:RefSeq:CAL35388.1"
/codon_start=1
/transl_table=11
/product="putative DNA-directed RNA polymerase omega
chain"
/protein_id="Prokka:DMACINML_00127"
/translation="MENRIEEIAAKALERMGDDRYRLSLVAKRAEQLADGAAPLVDI
DKSKLKFADIALYEIAENKITLEGLVETSR"
gene complement(130837..131553)
/gene="pyrH"
CDS /locus_tag="DMACINML_00128"
complement(130837..131553)
/gene="pyrH"
/locus_tag="DMACINML_00128"
/EC_number="2.7.4.-"
/inference="ab initio prediction:Prodigal:2.6"
/inference="similar to AA sequence:RefSeq:CAL35389.1"
/codon_start=1
/transl_table=11
/product="uridylate kinase"
/protein_id="Prokka:DMACINML_00128"
/translation="MQERKRVLVKFSGEALAGENGFGIENSILKFIANEIKELVKNNI
EVGIVIGGGNIIRGVSAAGGLIKRTSGDHMGMLATVINAIQEALESCGLDVRVQS
AIQMEAFCEYIMRRAQRHLEKGRVVI FAAGTGNPYFTTDTTAILRAVEIDAQMVKA
TKVNGVYDKDPNKFEDAVFLQTL SYDEAMQDNKVMDDTAIALAKDNSLPVVCMNMF
EGNLLKIIQGDNSLCSIVKN"
gene complement(131605..132807)
/locus_tag="DMACINML_00129"
CDS complement(131605..132807)
/locus_tag="DMACINML_00129"
/inference="ab initio prediction:Prodigal:2.6"
/inference="similar to AA sequence:RefSeq:CAL35390.1"

```

```

/codon_start=1
/transl_table=11
/product="putative peptidase M23 family protein"
/protein_id="Prokka:DMACINML_00129"
/translation="MRKILIFLCFFLLSNEIYANAINNEKTKNLEENKRIQEQVNNKLE
DLANDILSGEKSLKELSAQIETLNSQTLKLEARAKAQNKDLNLLTSQNTDLLKNKANM
EGKLITLMAKDFAYDLPIPGYVESKESFMAFEVLGSLDKILQDEIFKLSKDYEDISK
QIDSKQDQIKKINEDLKDYNTQLAKLQNLRQKQVSEINKQKTDRAIYAKKLENLQDQQ
DELRKTLNQLKIIESKQEDKKQTQKTASDSKITNNTQKIRQIGSSYQGSSTKRYTGKK
TIAPLESFTVKQKFGNYIDPVYNIKIFNENVVLRSKKADAVVKSVDGKIVFAKDTSM
LARVVIVEHDNGIHTIYAHLDKIAPNIKVGVKNVKKGAVVGRIKNDLTFEVTQKNFHIN
PLELISLN"
sig_peptide complement(132742..132807)
/locus_tag="DMACINML_00129"
/inference="ab initio prediction:SignalP:4.1"
/note="predicted cleavage at residue 22"
gene complement(132804..133610)
/locus_tag="DMACINML_00130"
CDS complement(132804..133610)
/locus_tag="DMACINML_00130"
/inference="ab initio prediction:Prodigal:2.6"
/inference="similar to AA sequence:RefSeq:CAL35391.1"
/codon_start=1
/transl_table=11
/product="putative integral membrane protein"
/protein_id="Prokka:DMACINML_00130"
/translation="MKFFKTHLSLILPLLMMFAFEFILLTNATLRYEELVNKDYNI
IVASSTELDKNVIKTKLSSFSDELLELDPKNLIDRLKNDISDKNLKILRDSLPRFYSIK
LNYLPTQNELNMIKNQLLSIPSISKVETFAKTHDKVYSLVLVLMKFVFWLFLFIIILLS
FVLFLKQMKIWLFEHTEVEIMCLFGAPFWFRSFMLYKIVVLDCFIAFVILFIFFTQI
YNLSIVQDSLKAVDIIILPPINFIVHLGVIFLVTLFICLLCVNSVMFRVKK"
gene complement(133597..134262)
/locus_tag="DMACINML_00131"
CDS complement(133597..134262)
/locus_tag="DMACINML_00131"
/inference="ab initio prediction:Prodigal:2.6"
/inference="similar to AA sequence:RefSeq:CAL35392.1"
/codon_start=1
/transl_table=11
/product="putative ABC transporter ATP-binding protein"
/protein_id="Prokka:DMACINML_00131"
/translation="MSNLIQAHKLSLGYDELVIKEASFTFKDDDFVFITGKSGSGKST
LLKSFYGDLELLSGQLEVCSSMRKIGNLELLKLRQQIGIIFQDYRLIQEYSVEKNVM
LPLMIKGYSKKVCHDQASKLLKHVNLTFKADKLPNQLSGGEQQRVAMARALAHNPKLL
LCDEPTGNLDEYSSDIIWTLKLSARELLGTCVVVVTHRIPSNLRLNYRRFNIENGMN
EIF"
gene complement(134311..135507)
/gene="trmB"
/locus_tag="DMACINML_00132"
CDS complement(134311..135507)
/gene="trmB"
/locus_tag="DMACINML_00132"
/EC_number="2.1.1.33"
/inference="ab initio prediction:Prodigal:2.6"

```

```

/inference="similar to AA sequence:RefSeq:CAL35393.1"
/codon_start=1
/transl_table=11
/product="putative tRNA (guanine-N(7)-)-methyltransferase"
/protein_id="Prokka:DMACINML_00132"
/translation="MPNFKARTLKEIILPFEKDGVEFVWMAYNDNVNLIYTKVEEESF
FLQVKKGENEFVVKVDKHTKPSKIAYLHKALYVFKQYFCEDIISEAFGIKNNALAEKT
PLIANDFEEVLARLEGRYIEIGFGSGRHLLYQAKNNPHVLILGIEIYNPAITQVAKL
AKAQGIDNILLVQSDARLLLSVLQSHSVEKIFLHFPVPWDKKPHRRVSKAFCKECAR
VLTAQGVFELRTDSYEFDFTFKEFLDFSSPQFSIRKNENLEISSKYEDRWKRQEKDI
YDLWVWNLKEENNPLSEEFDFSDIHLDKNDLMLLEKNFENFTLKKEDFFLHFENIYK
QGESLLLKIAFGAFNKPEHCYLHIGETISFVFKPEPKIQENLKAIKELKKSVKFHFNM
KHFLFN"
gene complement(135507..136739)
/locus_tag="DMACINML_00133"
CDS complement(135507..136739)
/locus_tag="DMACINML_00133"
/inference="ab initio prediction:Prodigal:2.6"
/inference="similar to AA sequence:RefSeq:CAL35394.1"
/codon_start=1
/transl_table=11
/product="putative fibronectin domain-containing
lipoprotein"
/protein_id="Prokka:DMACINML_00133"
/translation="MKKFHLSLCLGALTLFSACSVSQLSNIGSKKELLVNESLPKID
NLKSLSDISNIAFEWDPLYDDNIKGFYLYRSNDANPEFKLVGTIKDKFQTHYVDAKLE
PNTKYYYMMRSFNQGHISEDGKVVEVKTMPRLEAIAFAQAITNLPSRIKLIWRPHSD
PRVASYIIERAKADGQEFKKIAEVKNRLNAEFIDEDLKPEESFNRYRIAVGFDGVQSE
PSSVLNSTSKALPPQVEHLNASLDGANKIVLTWDAPKYKDFSYYKVYSTSSSLLPYTL
LAKTEQNSYEDIVEGAAKSRYKVTMVDIDGLESSMPKNGVEGKTLGSPSSPSVILAQ
STSDGIELEWVDNDSRAVEYEVRRYGGGQNAIFKGIKEKRLKDIKALPGVEYSYEVIA
IDSVGLRSEPSKRVKAGQ"
sig_peptide complement(136674..136739)
/locus_tag="DMACINML_00133"
/inference="ab initio prediction:SignalP:4.1"
/note="predicted cleavage at residue 22"
gene complement(136687..137652)
/locus_tag="DMACINML_00134"
CDS complement(136687..137652)
/locus_tag="DMACINML_00134"
/EC_number="4.2.1.70"
/inference="ab initio prediction:Prodigal:2.6"
/inference="similar to AA sequence:RefSeq:CAL35395.1"
/codon_start=1
/transl_table=11
/product="putative ribosomal pseudouridine synthase"
/protein_id="Prokka:DMACINML_00134"
/translation="MQTFLVDESSRLDTFLAKNLQQSRNQIALMIEKNCVWVNDKIQN
KNSFKLKVGDRLVNLPLVEEVKPKFDIDFDIEILYEDEDLLVLNKPNSLVVHGAKSV
KSATLVDWLEIKQYTLSTLGGEVVRAGLVHRLDKETSGAILIAKNNFTHQKLSEQLSDK
TMGRIYLALIDLPLKEDKIIIDKALIRSSANAIAKKIVTNSFVKGSKEAKSAFANLAKS
EDVSLIAAKLFTGRTHQIRAHLASINRHILGDELYGYRGKYECRIMLHAYFLYFIHPR
NGEKIFIQAPLMDDFKQILEKKFILGELNEKISLESLLGCFDSFI"
gene 137730..138836

```

/gene="mrdB"  
 /locus\_tag="DMACINML\_00135"  
 CDS 137730..138836  
 /gene="mrdB"  
 /locus\_tag="DMACINML\_00135"  
 /inference="ab initio prediction:Prodigal:2.6"  
 /inference="similar to AA sequence:RefSeq:CAL35396.1"  
 /codon\_start=1  
 /transl\_table=11  
 /product="RodA protein"  
 /protein\_id="Prokka:DMACINML\_00135"  
 /translation="MFIPDRRILTHFDYMQPILFIPILISFFLIFEANAFLAEKQFV  
 YACVGIAAFSVFFLLPIRKLMLIPIAYWVNILLSTDLFGVEKLGAKRWLEIPFTH  
 FTIQPSEIFKPSFILMLAYLIYQDPPPKNKYKQFLKLSFFIILPFLLIAQEPDLGS  
 AMVLLIVGFGVLFIMGVHYKIWLSIIIAIGISSPIIYTHFLKPYQKQRIHDFISEKPS  
 YQVAQSMIAIGNGGLIGKSQDEATQTHFNFLPISTSDFIAYLIERFGFLGGFVLILL  
 YTLLIFHLLSLNQKLKEDYFARVAINCVALFIFIYA AVNISMTIGFAPVVGIPLPFFS  
 YGGSSFTIFMIFFGILQHLITFRYFWIDSKNKIK"  
 gene 138883..138959  
 /locus\_tag="DMACINML\_00136"  
 tRNA 138883..138959  
 /locus\_tag="DMACINML\_00136"  
 /product="tRNA-Met"  
 /inference="COORDINATES: profile:Aragorn:1.2"  
 /note="tRNA-Met(cat)"  
 gene 139328..139591  
 /locus\_tag="DMACINML\_00137"  
 CDS 139328..139591  
 /locus\_tag="DMACINML\_00137"  
 /inference="ab initio prediction:Prodigal:2.6"  
 /codon\_start=1  
 /transl\_table=11  
 /product="hypothetical protein"  
 /protein\_id="Prokka:DMACINML\_00137"  
 /translation="MKHFIFSGLIGLALAGLAGCGDEAKTSDYYKAHLDEAKARVAE  
 CKKMEKMNETQQRDCSNANEAVLFQRDKNNKFYQSSPEAFEWK"  
 gene complement(140544..141023)  
 /locus\_tag="DMACINML\_00138"  
 CDS complement(140544..141023)  
 /locus\_tag="DMACINML\_00138"  
 /inference="ab initio prediction:Prodigal:2.6"  
 /inference="similar to AA sequence:RefSeq:AON64954.1"  
 /codon\_start=1  
 /transl\_table=11  
 /product="TPR repeat protein, Sel1 subfamily"  
 /protein\_id="Prokka:DMACINML\_00138"  
 /translation="MIVKNIKISNNIALKGLMVMKYFIFVFTLIPVCVYSNDNYFDL  
 GKEQHKQGNYSKAKQYYEKACELNIKEACNGLGLLYFDGDGVKQDRTQAVSYFKKACE  
 LEYGEACGILGLLYLDGDGVKQDRTQAVNYFKKACELGYGETCDILGLLYLDGDGVK"  
 repeat\_region 141296..141925  
 /note="CRISPR with 10 repeat units"  
 /rpt\_family="CRISPR"  
 /rpt\_type=direct  
 gene complement(142072..142470)

CDS /locus\_tag="DMACINML\_00139"  
 complement(142072..142470)  
 /locus\_tag="DMACINML\_00139"  
 /inference="ab initio prediction:Prodigal:2.6"  
 /inference="similar to AA sequence:RefSeq:CAL35625.1"  
 /codon\_start=1  
 /transl\_table=11  
 /product="putative CRISPR-associated protein"  
 /protein\_id="Prokka:DMACINML\_00139"  
 /translation="MFDIPTKSKKEQKSANKFRVSLVKLGFMMQFSVYVKICKGMTS  
 AKTAIKSVERILPPCGNIRVLTITEKQFDNMQILLGGVSNFNEKMNDDKNLVLFEYDEK  
 TQDFKYSNDKIYKENKTKSNKIRQASLFEF"

gene complement(142490..142732)  
 /locus\_tag="DMACINML\_00140"

CDS complement(142490..142732)  
 /locus\_tag="DMACINML\_00140"  
 /inference="ab initio prediction:Prodigal:2.6"  
 /inference="similar to AA sequence:RefSeq:CAL35626.1"  
 /codon\_start=1  
 /transl\_table=11  
 /product="putative CRISPR-associated protein"  
 /protein\_id="Prokka:DMACINML\_00140"  
 /translation="MIEVFRPLVDLCVFDLKDIKESEFLDKEAKQRLIGILQEEIIIE  
 NKAYPLNRAINFYIQNFKNALLENDELMMVNLYDRR"

gene complement(142852..143244)  
 /locus\_tag="DMACINML\_00141"

CDS complement(142852..143244)  
 /locus\_tag="DMACINML\_00141"  
 /inference="ab initio prediction:Prodigal:2.6"  
 /inference="similar to AA sequence:RefSeq:ADT66761.1"  
 /codon\_start=1  
 /transl\_table=11  
 /product="CRISPR-associated protein Cas1"  
 /protein\_id="Prokka:DMACINML\_00141"  
 /translation="MAYDEAFKSILISNQAKLSLEFNHLVIKQDDKEAKFFLKDINFI  
 ILESLQASITSSLLSALAKYKIILLTCDESHHINGIFSPFLGHFISAKVAKKQIKVTL  
 QRKAILWQKIIKNKISNQAHLKITHHI"

gene complement(143234..146236)  
 /locus\_tag="DMACINML\_00142"

CDS complement(143234..146236)  
 /locus\_tag="DMACINML\_00142"  
 /inference="ab initio prediction:Prodigal:2.6"  
 /inference="similar to AA sequence:RefSeq:AFU43535.1"  
 /codon\_start=1  
 /transl\_table=11  
 /product="CRISPR-associated protein"  
 /protein\_id="Prokka:DMACINML\_00142"  
 /translation="MKILGFDIGINSIGWAFVEDNQLQDCGVRLFTKAEDPKTKESLA  
 LPRRNARSNRRRLGRRRSRLIALKHIISKELKLNQDYIANDGELPKAYEGRVSPYE  
 LRYKALNEKIEPKDLARVILHIAKHRGYMKNKNEKSSDNEKGKILSALKTNALKLEKY  
 QSVGEYFYKEFFQKYKENTKDFINIRNKEGSYENCVLASDLEKELKLIKQKEWGSY  
 YDNDFIKEILKVAFFQRPLKDFSylVGACTFFEDEKRACKNSYSAWEFVALTKIINEL  
 KSLEKESGELVSSQIINEILNHILDKGSITYKKFREYIKLHESMKFKSLKYDKDNAES  
 AKLIEFRKLVEFKKALGEHSLTREELDQIATYITLIKDNEKLIKITLEKYSLNNEQIKN

LIEIDFNDHINLSFKALNLIPLMKEGKRYDEACKLLNLKTKSNNQKFDLPAFCDSI  
 FAQELTNPIVNRAISEYRKVLNALLKKYGKMHKIHIELARDIGLSKLLRTKIEKEQKE  
 NYENNIWALNECENFGLKANAKNILKLLKWLKEQKEFCIYSGKKISIEHLRDEKALEVD  
 HIYPYSRSFDDSLNKVLVFTKENQEKLNKTPEAFGANEERWSKIQALAQNLPHYKKK  
 NKILDEAFKGGKQQDFISRNLNDRYISTLIVKYTKEYLDLPLDEKEDINLKSGEKG  
 SKIHVQTINGMLTSLRHTWGFAQKDRNNHLHHALDATIVAYSTNAIIKAFSDFKKEQ  
 ELLKAKLYAKELTNSYKHQAKFFEPFEGFREQILNQINKL FVSKPPRRARGALHKE  
 TFYPKDEMIKKYNSQEGVEIALNCGKIRKIGTKYVENDTMVRIDIFKKQNKFYAIPY  
 TMDFALGVLPNKIVIAGKDKKGNPKQWQEIDESYEFCSLHKDDLVLIQKKDMQEPEF  
 AYYNSFDIGNSSICVEKHDKNFENLTDNQKLLFVNAKEGSVKAEKLGIOGLKIFEKYI  
 ITPLGEKIKADFKPREDIALKTSKKHGL"

gene complement(146318..147691)  
 /gene="dnaB"  
 /locus\_tag="DMACINML\_00143"

CDS complement(146318..147691)  
 /gene="dnaB"  
 /locus\_tag="DMACINML\_00143"  
 /EC\_number="3.6.1.-"  
 /inference="ab initio prediction:Prodigal:2.6"  
 /inference="similar to AA sequence:RefSeq:ABS44015.1"  
 /codon\_start=1  
 /transl\_table=11  
 /product="replicative DNA helicase"  
 /protein\_id="Prokka:DMACINML\_00143"  
 /translation="MQQEHFDLDERAILSSCIMSEDAYSSIAGDIEPKDFSLKAHQD  
 VFKAIIACVNAGEPISISFLKXKXKIDEQILTEIIATPSIIDLPAYVNELREKSIKRQ  
 LLSFAHLLPTRINDNRAVSEISDEIGKEIFNITNRVNTNDIKDIEIVLSELLEEFKKQ  
 KSLENKSVIGLDTGFEDLNTMTKGFKGGELIIIAARPGMGKTTLCLNFIEKVLQRDQK  
 VVMFSLPAAQIMQRMLSAKTSIPLQKILTADLNDNEWERIGDACNYYSKXKLFYD  
 SGYATITDVRAILRRLKAQEEISGLCVIDYIGLMMNSNFNDRHLQVSEISRGLKLLA  
 RELDMPIIALSQLNRSLEQRANKRPMSDLRESGAIEQDADTILFVYRDEVYREQDEK  
 ERENKAKAEGKPYQRNFIPNPMQENAEILVGKNRNGPVGVEVLFLEKESCFVDKPRF  
 ESVEFQE"

gene 147836..148765  
 /locus\_tag="DMACINML\_00144"

CDS 147836..148765  
 /locus\_tag="DMACINML\_00144"  
 /inference="ab initio prediction:Prodigal:2.6"  
 /inference="similar to AA sequence:RefSeq:ADT65897.1"  
 /note="conserved hypothetical protein"  
 /codon\_start=1  
 /transl\_table=11  
 /product="hypothetical protein"  
 /protein\_id="Prokka:DMACINML\_00144"  
 /translation="MKKTLFSFALASLFVSQASSIEFQSGLSGNLSLIGIGARDVKSNI  
 SPLANSNYLGGYNAKNSDTAAIPFIGLELYGNLIDNDRVFLKNYNGRDLSGIALGYE  
 RAYLERFSTSFSSISLREKAYANPYFIGNREETDVSKYGRISQLYESDFGKFNASY  
 VFAKNKLDKESIEFDSLKREGNYHELELSYNSLLNLGLIYDYNADGKAQSYSRYGF  
 KIGTHLVFARNYILTPSLSLNQYKADGTDPIFNQKQDGSITKFNLLVKNQFLGYDSL  
 YGFVNYGLEKRNSDIDFYDETYHILLTGVGKFK"

sig\_peptide 147836..147892  
 /locus\_tag="DMACINML\_00144"  
 /inference="ab initio prediction:SignalP:4.1"  
 /note="predicted cleavage at residue 19"



gene complement(148788..150119)  
 /locus\_tag="DMACINML\_00145"  
 CDS complement(148788..150119)  
 /locus\_tag="DMACINML\_00145"  
 /inference="ab initio prediction:Prodigal:2.6"  
 /inference="similar to AA sequence:RefSeq:CAL34706.1"  
 /codon\_start=1  
 /transl\_table=11  
 /product="putative MATE family transport protein"  
 /protein\_id="Prokka:DMACINML\_00145"  
 /translation="MSNIFSTLSPFRLFVKCAVPNVISMAFISFYIYVDGIFVGKYLGN  
 DALAALALIIPFIMISFALADMIAIGSAVQISMHLGLGKKHLARKIFSSSMLIIFLI  
 SCLVGILEYLLSPVLINFLDVSEDIKSMKECMLVFALFAPFTMCSFALDNYLRICGK  
 TTYSMMMNVIIALSNIIVLDYIFIVVLGWGLFSAALATCLGLMLGGIFGIFPFLFQNL  
 LKFSSLYMNMKIFKNIVYNGSSEFFGNISGSLYGIFANLVLLKISGTQVAFAAFSIVSY  
 IDNFIIIMLIAMGDAMQPALSINYAKKDFSRIKDILKVMFFAGAILSLLSIVMIFVCG  
 KDLVGLFTQEGDQEFIIIFAYMALMLFSFNFLFAWFNVLSGSFLTASNKASFSLILSLS  
 QNLFIPLCFLLILSSIMGLKGVWLSPPFAELCVLILACIFVRKVKFKLSFL"  
 gene complement(150345..151280)  
 /locus\_tag="DMACINML\_00146"  
 CDS complement(150345..151280)  
 /locus\_tag="DMACINML\_00146"  
 /inference="ab initio prediction:Prodigal:2.6"  
 /inference="similar to AA sequence:RefSeq:CAL34705.1"  
 /codon\_start=1  
 /transl\_table=11  
 /product="putative pyridine nucleotide-disulfide  
 oxidoreductase"  
 /protein\_id="Prokka:DMACINML\_00146"  
 /translation="MKKVDLIVGAGPTGIGCAVEAKLNKNEVLVLEKSNNICQTLMO  
 FYKDGKRVDMAKYGCEGTNHGHVFPQDGTKESTIETFQNALNEHNIIEVEFGSEVESVK  
 NENGVFLVSTGKGVYECKNIIVAIGRMGKPNKPDYKLPGLTKIINFNANSVLGDEKI  
 LVVGGNSAAEYAVDLANSNKVSLCYRKEFTRLNDINLKDIEAGNSGKVELKLGID  
 IEELEDDNGKAKVKFNDGSSETYDRIIYAIGGSTPLDFLQKCGINVDDKGVPLMDENK  
 QSNVKGIFVAGDIATKNGASIVTGLNDAVKILAVI"  
 gene 151351..152583  
 /gene="proA"  
 /locus\_tag="DMACINML\_00147"  
 CDS 151351..152583  
 /gene="proA"  
 /locus\_tag="DMACINML\_00147"  
 /EC\_number="1.2.1.41"  
 /inference="ab initio prediction:Prodigal:2.6"  
 /inference="similar to AA sequence:RefSeq:CAL34704.1"  
 /codon\_start=1  
 /transl\_table=11  
 /product="gamma-glutamyl phosphate reductase"  
 /protein\_id="Prokka:DMACINML\_00147"  
 /translation="MRNLLENIKNSQKLLNLTPKDKENIILKLAHTLRKNFKTILES  
 NEKDITNFTKSGAMRDRLLLDEKRIFSLCDALEKIAYLEDPIGKISKGWVNYAGLKIE  
 KISIPIGLISVIYEARPSLSAEIIALMIKSSNACVLKGGSEAKFTNSAIFDLVYKVL  
 EFNLQDCFAMFYERNEIMQILAFDDLIDVIIIPRGSSNMIQEIASHTKIPLIKQDKGL  
 HAFVDESANLNMALEIILNAKQQRVSVCNALETLLIHEKIAKDFIELLIPEFEKFKVK  
 IHAHENILEHFKNKLEISKADESTFDTEWLDFAISVKSVDKDCDEAIEHINQHSSLHS

ETIISNNALNINKFQRLLRSSCIYVNASTRFSDGGEGFGGGEVGIKSTSKLHARGPMGV  
 EDICTYKYLISGEGQIRK"

gene 152580..153665  
 /locus\_tag="DMACINML\_00148"

CDS 152580..153665  
 /locus\_tag="DMACINML\_00148"  
 /inference="ab initio prediction:Prodigal:2.6"  
 /inference="similar to AA sequence:RefSeq:CAL34703.1"  
 /codon\_start=1  
 /transl\_table=11  
 /product="putative integral membrane protein"  
 /protein\_id="Prokka:DMACINML\_00148"  
 /translation="MSKRKILKQYKEIIQLNPTERVWQMPFFALAVGFALSIAAYY  
 ERMDLGLIAMIGIMAFVYTTNTPMYHRMAVTMCCSFGLCLSFLIGLCTHFFPAFSPLI  
 IGLVAMASSILIRYYNIGAPGYFFFVFSCLLASFFPFAKDYIFLVGLICIGGIIANI  
 AAFLYSVSVIYIFKNSPKPVLQNGNLGFDIIFVDSIIIAFFVGFVFLGAFLELDRS  
 YWVAVSTTVILQGANLKSVMKQLQRILGTTVGILFAWLLKIKFTPLEFVLLMMFLA  
 FIIIEFLVVRNYALTVIFLTPYVTYLAEAAFGNLSVDMLIHARLQDIIIGSLLGLLGG  
 FVIHKPYLRKYFEYIAKYIFRVRLANR"

gene complement(153776..154345)  
 /gene="efp"

CDS complement(153776..154345)  
 /gene="efp"  
 /locus\_tag="DMACINML\_00149"  
 /inference="ab initio prediction:Prodigal:2.6"  
 /inference="similar to AA sequence:RefSeq:CAL34697.1"  
 /codon\_start=1  
 /transl\_table=11  
 /product="elongation factor P"  
 /protein\_id="Prokka:DMACINML\_00149"  
 /translation="MASYSMGDLKKGLKIEIDGIPFKIVEYQHVKPGKPAFVRIKIK  
 SFIDGKVLKTFHAGDKCEAPNLEEKTMQYLYDDGENCQFMDTESYEQVAISDEDVGE  
 AKKWMLDGMVDVLFHNGKAIGVEVPQVVELKIVETAPNFKGDTQGSNKKPATLETGA  
 VVQIPFHVLEGEVIRVDTVIRGEYIERANK"

gene complement(154780..155052)  
 /locus\_tag="DMACINML\_00150"

CDS complement(154780..155052)  
 /locus\_tag="DMACINML\_00150"  
 /inference="ab initio prediction:Prodigal:2.6"  
 /inference="similar to AA sequence:RefSeq:CAL34696.1"  
 /note="hypothetical protein Cj0550"  
 /codon\_start=1  
 /transl\_table=11  
 /product="hypothetical protein"  
 /protein\_id="Prokka:DMACINML\_00150"  
 /translation="MKQWLSDFKLALIQEDVKNLEGLLNTLDLKKMLEDLARDFQSDE  
 LKDKLNDNLSQIKALLQEAVLISEKKNSKACEIQKIQKALKYFKD"

gene complement(155036..155419)  
 /gene="fliS"

CDS complement(155036..155419)  
 /gene="fliS"  
 /locus\_tag="DMACINML\_00151"

```

/inference="ab initio prediction:Prodigal:2.6"
/inference="similar to AA sequence:RefSeq:CAL34695.1"
/codon_start=1
/transl_table=11
/product="flagellar protein"
/protein_id="Prokka:DMACINML_00151"
/translation="MQNNLAYNAYSQNQAGIESPQKLIEMLYEGILRFCSRAKVAIRN
EDIEQRVHFVKRTTAIFIELINTLDYEKGGGEVAHYLSGLYTREIQLLSLANLENNEAR
IDEVINVTKGLLEAWREVHSNEAMA"
gene complement(155429..157378)
/locus_tag="DMACINML_00152"
CDS complement(155429..157378)
/locus_tag="DMACINML_00152"
/inference="ab initio prediction:Prodigal:2.6"
/inference="similar to AA sequence:RefSeq:ALW55331.1"
/codon_start=1
/transl_table=11
/product="flagellar capping protein"
/protein_id="Prokka:DMACINML_00152"
/translation="MAFGSLSSLGFGSGVLTQETIDKLKEAEQQARVNPYTTKIEENT
TKQKDLTEIKTLSTFQSAVSSLGDATAFAKRKVASITDNPPASLTATSGVALQSMN
INVTQLAQKDQVYQSKGLANDTGFINANLESSTNLTFFSKGKEYTVTIDKNTTYSIDLVD
KINSATGGEIVAKMVNTGEKDTPYRLTLTSKETGEDSAISFYPGAKDSSGKYAVDENA
KSVFESLQWTLDDNALNAEGFDPATSKKGVGIIDDAENPLHIQQAQANFTMDGIKMT
RSSNTITDIGVGITLTLNKTGEINFDIQQDSEITQAMQEMVDAYNDLVNLNAATDY
NSETGTGKSLQGVTEVNSIRSSIVSILFQSQSVDGTVEDASGNKVSQKMLSLQDYGL
SMTESGTLNFDSSAFESKVKEDTAMAESFFSGITQYKNINHTGELIKQGSLENYLNKV
EGDDNGISFDSGKFQIVSDFETYDLSKNADGTAFKLSGATEQEMLQNLADHINSKQIE
GLTVKVESYNQNGETGFKLNFKTDGNADFAIKGDNDFLKQFGLSQVSIAAEAVEGAGV
FAQLKTTLQGITGTDGSLTKYDESLTNDTKALTESKESAQKLIIDTRYETMANQWLQYE
SILNKLNQQLTTVTNMINAANNSNN"
gene complement(157380..157748)
/locus_tag="DMACINML_00153"
CDS complement(157380..157748)
/locus_tag="DMACINML_00153"
/inference="ab initio prediction:Prodigal:2.6"
/inference="similar to AA sequence:RefSeq:CAL34693.1"
/codon_start=1
/transl_table=11
/product="flagellar protein"
/protein_id="Prokka:DMACINML_00153"
/translation="MEISKANGQLDAAFANLAQRASGAHQTNSDIQAGGNQSQGGDDK
QQGNLNNKLTDIRVRLNEQMSLDTNVRFGYSDKIDSMYISVTEKSTGREIRQIPSEE
AMRLAEYFRDVIQGMIFDKES"
gene complement(157910..159715)
/locus_tag="DMACINML_00154"
CDS complement(157910..159715)
/locus_tag="DMACINML_00154"
/EC_number="4.1.1.-"
/inference="ab initio prediction:Prodigal:2.6"

```

```

/inference="similar to AA sequence:RefSeq:CAL34692.1"
/codon_start=1
/transl_table=11
/product="putative 3-octaprenyl-4-hydroxybenzoate
carboxy-lyase"
/protein_id="Prokka:DMACINML_00154"
/translation="MKDFIKILKDNDLLKVYEEPVDIDLEIAHLAYIEAKKGENGKAL
LFKNPVDKRNNKQYKFPVLMNAFCNEKALNLAFGRDYKEVADEISKLTCLHIPTSFKA
KIDFFMNLSSLKNVPPKRLKADKALYDYELLNSLEELPILKTWEEDAGRIFITMGQVYT
QNLDKTQNNLGMRYLQVSDKNELLMHWQIHKDGANFYHEYKNAGFKKMPVSIAGGDP
LYIWCSQAPLPKGIPELLYGFYIKKTPAKLTPCENGIFVPYDSDIVIEGYVDLEEFKI
EGPFGDHTGFYTPAELFPVMKVEKIYTKKEAIYQATVVGKPPLEDKIMGLGTERIFLP
LLQTSVPLIDYKMPENGVFHNLILAKIDAKYPAHAQQIMHAFWVGQMSFVKHAIFFV
DKKAPNLDDYDALIPYILNRFNANKILISEGICDQLDHASPNSCFGGKAGLDACEETI
VEELEILEDEKLELLEFKTKIELVNLKQFYKESKSPIVCILLDKKEKIEQSFELLEFK
KHFRLVFLDTNKNLENPYMLVWRVNNIDAKRDIFIKADRVGIDATAKGLVEGYERV
WPKQTDCTKSVIEDLILRNILENSELFSKFEILG"
gene complement(159712..160638)
/gene="hemC"
CDS /locus_tag="DMACINML_00155"
complement(159712..160638)
/gene="hemC"
/locus_tag="DMACINML_00155"
/EC_number="2.5.1.61"
/inference="ab initio prediction:Prodigal:2.6"
/inference="similar to AA sequence:RefSeq:CAL34691.1"
/codon_start=1
/transl_table=11
/product="porphobilinogen deaminase"
/protein_id="Prokka:DMACINML_00155"
/translation="MKELVIATRKSQALALWQSEFIANFLSKTHGI AVRLEGFKTKGDV
ILDSPLAKIGGKGLFTKEEESMLRNEAHLAVHSLKDVSPFFPQGLVLAISKREQSN
DAMLSQNYKDFLSLPKGARIGTTSRRKMLLLLLRPDLEIISLRGNVNSRIEKLKNGD
FDAIILAMAGIKRLDLKQVNFVYAFSKDELIPAASQGALGIESIDDEKILEFLKCLN
DDNALIETTIEREFIATLEGGCQVPIGINAELLNDEICVRAILGLPDGSEILKEKRMI
KKSEFKGFGESLAKEFIAKGAKEILKKAESMI"
gene complement(160635..161021)
/locus_tag="DMACINML_00156"
CDS complement(160635..161021)
/locus_tag="DMACINML_00156"
/inference="ab initio prediction:Prodigal:2.6"
/inference="similar to AA sequence:RefSeq:CAL34690.1"
/codon_start=1
/transl_table=11
/product="putative integral membrane protein"
/protein_id="Prokka:DMACINML_00156"
/translation="MNYKLSLSPLFLELVASILFIVFFGLGNFLIFILASMI FGVIL
LGIFWKNMLEFRISDFKNMLTQFAFIMAAFLIFPGIVTSIFGFFVLCFGLIFNFAKP
RYKRNYRQNNTSDEEIIDVEIIEEK"
gene complement(161018..162724)
/gene="proS"
CDS /locus_tag="DMACINML_00157"
complement(161018..162724)
/gene="proS"

```

```

/locus_tag="DMACINML_00157"
/EC_number="6.1.1.15"
/inference="ab initio prediction:Prodigal:2.6"
/inference="similar to AA sequence:RefSeq:CAL34689.1"
/codon_start=1
/transl_table=11
/product="prolyl-tRNA synthetase"
/protein_id="Prokka:DMACINML_00157"
/translation="MKFSKLYAPSLKEAPKDATLPSHIFLTRAGFVEQIGSGLYNFLP
LGKKVLDKIRTIVKEEMDKAGAQEVSLSFVTPATLWQESGRYNVFGKELLRFKDRKEN
DFVLGPTHEEAMLSLVKNKITSYKQLPLHLYQIGLKFRDEARPRFGLLRCREFLMKDG
YSFHANEEDLTREFDLMHKTYSQILQRMGLEFRAVDADSGAIGGSGSKEFMVLAKNGE
DDILICENDYAAANVEAAIRANKTCDEERPEANYTSKFHTPDVKTIEALAQQFFKINAF
YTIKAVVKKAIYENENKLVVFFIRGCDDLQETKAQNACNALELVDASEEELEKAGLVA
GFIGFVGLKNVDFYLDKELEGEKQMIMGANEDYHLIGIDVVNLNKRDFKDIAEVKEN
DCCAKCGGKRLRSKGIEVGHIFKLGQKYSKAMNANFLDENGSKSPFYMGCYGIGVSRL
LAVAI EANHDEKGC IWNKTLAPFTLEIIVSNIKDEKSLEFATKLYEDLSNVGIEVLLD
DRNERFGVMNDFELMGFPYALVVGKGLEKDELEFIDRKTLEKKILSSKEAFDFIKKS
VE"
gene complement(162714..164009)
/locus_tag="DMACINML_00158"
CDS complement(162714..164009)
/locus_tag="DMACINML_00158"
/EC_number="1.2.1.70"
/inference="ab initio prediction:Prodigal:2.6"
/inference="similar to AA sequence:RefSeq:CAL34688.1"
/codon_start=1
/transl_table=11
/product="glutamyl-tRNA reductase"
/protein_id="Prokka:DMACINML_00158"
/translation="MYYCISFTHKNTDISLRERLSFSDEAKKNEFLRLLSIHENIEEC
LVISTCNRVEIVAYVKEACA EYIIKSLALLCNVDKESLVQKADIFEDSGAIHHLFSVA
SSLDLVLVGETQIAGQLKDAFALKNFCAVHLSRAIHSFAKCAAKVRNETQISKNP
ISVASVAVAKAKELLPLEGKSAIVIGAGEMGELA AKHLIAAGARV IILNRDIEKARIL
CERLGVLSECDLNNLKKYLDEYELFFSATNASSAIITNSLIDEVSHKRYFFDI AVPR
DIDVSENEKVSFVAVDDL EVVVRNNLALREQ EARMAYGIIGRETAEFFRYLNDLALTP
IIKAI RLQAK ECANKQLQIALDKGYL KHSDEEEARKLIHQVFKAFLHTPTINL KHLQG
KMQSDTVINAMRYIFALENNLEGLNQYACEFNMENNDEI"
gene complement(164009..164902)
/locus_tag="DMACINML_00159"
CDS complement(164009..164902)
/locus_tag="DMACINML_00159"
/EC_number="2.5.1.-"
/inference="ab initio prediction:Prodigal:2.6"
/inference="similar to AA sequence:RefSeq:CAL34687.1"
/codon_start=1
/transl_table=11
/product="polyprenyl synthetase"
/protein_id="Prokka:DMACINML_00159"
/translation="MQPIDDLIKQYLQELDYEPVLTMLANTKSGKKLRSKLLLA IAGE
NANSYKICAAIELIHLASLLHDDI IDESKLRRGAKSVNAEFGTKNALMLGDILYSKAF
YELSQLDACFASII SDAVKLAVGELMDVELSKSFNADKDKYLKMIYNKTAVLIEASA

```

RCGAILAKLDEKAFGEYGKNLGLAFQMIDDILDIKGEKTLGKPMNDFKEGKTTLPY  
 IYLCENLNDEDRTQLRNLFQKDLNDEKTMQIKFEETKALNKAISEAKEYAQQAALA  
 IKDFSNEQLQGIIQAMIDRDF"

gene complement(164919..165449)  
 /locus\_tag="DMACINML\_00160"

CDS complement(164919..165449)  
 /locus\_tag="DMACINML\_00160"  
 /inference="ab initio prediction:Prodigal:2.6"  
 /inference="similar to AA sequence:RefSeq:CAL34686.1"  
 /codon\_start=1  
 /transl\_table=11  
 /product="putative exporting protein"  
 /protein\_id="Prokka:DMACINML\_00160"  
 /translation="MSIRLLVFFALMANCIVLNAAPVFDYTYKFTLKKDERASVEIKE  
 LGYDNGVQNFDFYWTLFDNTNIVVHVKFRKYPRQFVMSLRRNLDWVTQTLPDYKNPH  
 IDRARLILEFSEYKKGEAIFTVYIEDKDSRLEVKFLDPRKMQLTNPPQNNQVVP MIDF  
 NEPQVKPLIQRENTTN"

sig\_peptide complement(165387..165449)  
 /locus\_tag="DMACINML\_00160"  
 /inference="ab initio prediction:SignalP:4.1"  
 /note="predicted cleavage at residue 21"

gene complement(165449..165712)  
 /locus\_tag="DMACINML\_00161"

CDS complement(165449..165712)  
 /locus\_tag="DMACINML\_00161"  
 /inference="ab initio prediction:Prodigal:2.6"  
 /inference="similar to AA sequence:RefSeq:CAL34685.1"  
 /note="hypothetical protein Cj0539"  
 /codon\_start=1  
 /transl\_table=11  
 /product="hypothetical protein"  
 /protein\_id="Prokka:DMACINML\_00161"  
 /translation="MDIFDEMFKTPKEKFIEIIQNGNLGALEKVFENFFADHIAMIE  
 LLEKQGFNEMDVKSFILENGDFIQERQNDLFIELGAKILGHEG"

gene complement(165841..166398)  
 /gene="oorC"

CDS complement(165841..166398)  
 /gene="oorC"  
 /locus\_tag="DMACINML\_00162"  
 /inference="ab initio prediction:Prodigal:2.6"  
 /inference="similar to AA sequence:RefSeq:CAL34684.1"  
 /codon\_start=1  
 /transl\_table=11  
 /product="OORC subunit of 2-oxoglutarate:acceptor  
 oxidoreductase"  
 /protein\_id="Prokka:DMACINML\_00162"  
 /translation="MKYQLRFGGEGGQGVITAGEILAEAAIKEGRQAFKASTYTSQVR  
 GGPTKVDIIIDDKEILFPYAVEGEVDFMLSTADKGYKGRGGVKEGGIIVVEPNLVHP  
 ESEDYKKWQIFEIPIITIAKDEVGNVATQSVVALAIAAYMSKCIDLDILKETMLHMVP  
 AKTRDANSKAFDLGVKYAQETKAHS"

gene complement(166395..167240)  
 /gene="oorB"  
 /locus\_tag="DMACINML\_00163"

CDS complement(166395..167240)  
 /gene="oorB"  
 /locus\_tag="DMACINML\_00163"  
 /inference="ab initio prediction:Prodigal:2.6"  
 /inference="similar to AA sequence:RefSeq:CAL34683.1"  
 /codon\_start=1  
 /transl\_table=11  
 /product="OORB subunit of 2-oxoglutarate:acceptor oxidoreductase"  
 /protein\_id="Prokka:DMACINML\_00163"  
 /translation="MAFNYDEYLRTDKLPTQWCWCGDGVVLKCIIRAIEKLGWNMDD  
 VCLVSGIGCSGRMSSYVNCNTVHTTHGRAIAYATGIKLANPSKHVIVVSGDGTLAIG  
 GNHTIHGCRNIDLTHIVINNFYGLTNSQTSPTTPKGFYTVTAQFGNIDPNFDACEL  
 TKAAGASVARGNVEANKLENLIYKALAHKGYSFVDVFSNCHINLGRKNKMGEAVAM  
 LDWIKNRVVDKSKFESMDFEERKDKFPTGVLYEDSTQPEYCHAYEEVRRAAKEKRMVD  
 LGALK"

gene complement(167242..168366)  
 /gene="oorA"

CDS complement(167242..168366)  
 /gene="oorA"  
 /locus\_tag="DMACINML\_00164"  
 /inference="ab initio prediction:Prodigal:2.6"  
 /inference="similar to AA sequence:RefSeq:CAL34682.1"  
 /codon\_start=1  
 /transl\_table=11  
 /product="OORA subunit of 2-oxoglutarate:acceptor oxidoreductase"  
 /protein\_id="Prokka:DMACINML\_00164"  
 /translation="MREVIATGNVLIAKAAIDCGCKFFGGYPITPSSEIAHELSHMLP  
 ANDGTFIQMEDEISGVSVTIGAAMSGVKSM TASSGPGISLKAEQIGLAFIAEIPLVIV  
 NVMRGGPSTGLPTRVAQGDLFQAKAPTHGDFASVAIAPASLEEAYTETIRAFNLAEKY  
 MTPVFLLMDETVGHMNGKAVLPDLKDIEIINRKKFTGDKKDYKPYAAGENEPATLNPF  
 FTGYRYHVTGLHHGDIGFPTEDGAIVKKNIERLIGKIKNNQDDICTYEEYMLDDAEFL  
 IIAYGSVSRSAKEAINRLREEGIKVGLFRPITLYPVAEKKIAEVVSKFKKVMVSELNM  
 GQYLEEIERVSSRRDFISLHRANGRPITPSEIIAKVKENI"

gene complement(168375..168686)  
 /gene="oorD"

CDS complement(168375..168686)  
 /gene="oorD"  
 /locus\_tag="DMACINML\_00165"  
 /inference="ab initio prediction:Prodigal:2.6"  
 /inference="similar to AA sequence:RefSeq:CAL34681.1"  
 /codon\_start=1  
 /transl\_table=11  
 /product="OORD subunit of 2-oxoglutarate:acceptor oxidoreductase"  
 /protein\_id="Prokka:DMACINML\_00165"  
 /translation="MSIAAPKDTPVWVDEHRCKACNICVSYCPAGVLAMRDDVHAVLG  
 QMIEVVHPESCIGCTECETHCPDFAIMVAKRDEFKFAKL TPEAKDRAVAVKNNKYKKL  
 A"

gene complement(168701..169570)  
 /gene="sucD"

CDS /locus\_tag="DMACINML\_00166"  
complement(168701..169570)  
/gene="sucD"  
/locus\_tag="DMACINML\_00166"  
/EC\_number="6.2.1.5"  
/inference="ab initio prediction:Prodigal:2.6"  
/inference="similar to AA sequence:RefSeq:CAL34680.1"  
/codon\_start=1  
/transl\_table=11  
/product="succinyl-coA synthetase alpha chain"  
/protein\_id="Prokka:DMACINML\_00166"  
/translation="MSILVNKNTKVIVQGFTGKEATFHAEQCIAYGTNIVGGVTPHKG  
GQTHLGKPVFDTVADAVKATGADVSLIFVPAFAVGDSVIEAADAGIKLAVVITEHTPV  
KDMMAKQYANKKGMKIIGPNCPIITSEECKLGIMPGFIFKKGCVGLISKSGTLTYE  
AANQVVQGGYGISTAVGIGDPDIIGLAYKELLSEFEKDNETKAIVMIGEIGGSLEVEA  
AKFIKENISKPVVAFIAGATAPKGGKRMGHAGAIVGSADESAANKKEALKSYGIHVVD  
PALIGEEIQKILG"

gene complement(169580..170743)  
/gene="sucC"

CDS complement(169580..170743)  
/gene="sucC"  
/locus\_tag="DMACINML\_00167"  
/EC\_number="6.2.1.5"  
/inference="ab initio prediction:Prodigal:2.6"  
/inference="similar to AA sequence:RefSeq:CAL34679.1"  
/codon\_start=1  
/transl\_table=11  
/product="succinyl-coA synthetase beta chain"  
/protein\_id="Prokka:DMACINML\_00167"  
/translation="MNIHEYQAKAIFADNGIPTLKGKVAFSVEEAVENAKELGGSVWA  
VKAQIHAGGRGLGGGVKIAKNLDEVKAYASQILGMNLVTHQTGPEGKLVQKLYIESGA  
NIVKEYYLAILFNRMAEQITIIASSEGGMIEKVAKESPEKIAKVGIDPQIGFKMFHG  
LEVAKVLGLDKDESKKLISMIKLYKLYMDKDMNMLEINPLIKTAEGDFYALDAKCSF  
DDSALYRHPAELRDITEENPAEREADEFGLSYVKLDGDVACMVNGAGLAMATMDII  
NYSKAKPANFLDVGGGASAETVAKAFEIILRDKNVKVFIFINIFGGIVRCDRIANGILE  
ATKNVEVNIPIVRLDGTNAEAKAILDSSNLKNIKAATNLKNGAELVKSLVG"

gene complement(170740..171648)  
/gene="mdh"

CDS complement(170740..171648)  
/gene="mdh"  
/locus\_tag="DMACINML\_00168"  
/EC\_number="1.1.1.37"  
/inference="ab initio prediction:Prodigal:2.6"  
/inference="similar to AA sequence:RefSeq:CAL34678.1"  
/codon\_start=1  
/transl\_table=11  
/product="malate dehydrogenase"  
/protein\_id="Prokka:DMACINML\_00168"  
/translation="MKITIIIGAGNVGSSVAYALILRELANEIVLVDINEDLLIAKELE  
LSQSIAALNLDIELICTKDYSCTKNSDIVLFSAGFARKDQGSREELLQLNANIMLDCA  
KKIKFNSDPLFIILTNPVDFLLNTLYESGIFSSKKIVAMAGVLDNARFKYEVAKKLLK  
AKISSVDTRLIGFHNDMVLVKSYSVKNQKLGELLSEEEFEDLENEVKTGGAKVIKH"



```

LKTSAYLAPASACVRMLESIRSGEFLPMSVILHGEFGVQNKALGTMARLGLGEGVVEIM
KLELSDEEKDKVKKSLIKYQYIKEDK"
gene      complement(171645..173849)
          /gene="icd"
          /locus_tag="DMACINML_00169"
CDS      complement(171645..173849)
          /gene="icd"
          /locus_tag="DMACINML_00169"
          /EC_number="1.1.1.42"
          /inference="ab initio prediction:Prodigal:2.6"
          /inference="similar to AA sequence:RefSeq:EAQ73167.2"
          /codon_start=1
          /transl_table=11
          /product="isocitrate dehydrogenase, NADP-dependent"
          /protein_id="Prokka:DMACINML_00169"
          /translation="MQVTTYLTDESPALATYSFLPIVKAFLSKAHIGVKTSDISLSGR
ILATFSEYLKEDQRCEDALELLGELVKKSDANLIKTPNISASIPQLKAAIKELQEKGY
MLPNYPDEPKNDEEFQIKTKYQKVLGSAVNPVLRQNSDRRSTKAVKDYAKNNPYRVV
EFNPNSKTRVSYMKEGDFFSNEKAVLIDEDCVASIEFVADSGKSEILKEGLKLEKNEI
LDATFMDVEKLQDFYAQEIKASKDNDLLFSLHLKATMMKVSDPILFGYAVKIFFKELF
DEFKDEFETLGINPNNGLSELLSKVETSSKKDEILKRYNEILNSRADISMVNSDKGIT
NLHVPSDVIVDASMPAMLKNGARLWDKEGKEKDTNAVIPDQTYATIYEAVIEDLHKNG
TLNPAKLGVSNSVGLMAKKAQEYGSHTKTFVAKEDGVFKIIAKGKVLLEHKVRKGDYI
RANQAKFDAVLNWIDLGIERADLTGAEAIFWLDSKRASNKIMIDLQVNRLEKKNKNIA
ILAPYEACLKSLLEIRAGKDAISITGNVLRDYLTDLPFIELEGTSAKMLSVVPMNGG
AMFETGAGGSAPKQVEQLVEENHLRWDSLGEFLALQASLEFYANKCNNHKAKVLAECL
DEAIGEWLENNKAPSRKVKEDDNRSTSHFYLAMYPANHLARQANDMELQSFKIDIALEF
SSNEEKIRAEFNDAQGVKVDLGGYYKFDDEKANKIMRPSATFNIAIIEKIGQR"
gene      complement(173966..176536)
          /locus_tag="DMACINML_00170"
CDS      complement(173966..176536)
          /locus_tag="DMACINML_00170"
          /inference="ab initio prediction:Prodigal:2.6"
          /inference="similar to AA sequence:RefSeq:CAL34676.1"
          /codon_start=1
          /transl_table=11
          /product="putative periplasmic protein"
          /protein_id="Prokka:DMACINML_00170"
          /translation="MKKKIVYVLLVLIVFISAIFLVLKNGILISNIQLSFLNLEQLYI
KLDKKLIVRAKNITFNEDTNASIQDDKNENSDFASKELLKITKNLKYLYTFVEEIDIQ
NLNIKDNHMRILFKNDEFFVDNDLLFLKLALHREGQEINADIKNLWLKDYNLSVDGNL
SINARSEFYNFKGQASGDLIDFKVNISYKNQNLAYKFEDINIRDITTFNQAEKRITL
PEPLVLWVAHRAKGDFYHFDFIQGFVDLSKNYYFDDISAWGYANNVKVRLDNQMNAI
NFPKLDLNLNQKLNFTFNKASYNESDLSSEKVFYLDLFDNKKHGIYLRKSKNLKFD
EKLAKALKNYNLNLPFYQKSGKLGSDLELIIDFNEKGDLYNGTSLSENAELTLANFN
VAKAFVKNQNDLSIENASVKNFLEANFNAKIDLANHKGIFDTQISRLYFDNGELFD
MRNQKTVINLDYKDDLQLSMPDWDLTLNFKEGLEVYANSSVLIHPSPLLNKFGFMSA
KSIYYKSIDFNDFNAQIQDAHFKNLLVDNKPYPENDSFGIVRKNGLVDINTQSGLVSA
KIIDNNKTIHLKNLTYTYQKDKNASASSFDIAKNTQNIILNGENLALILADFNKTLKF
DKLEANLKSIDILARATRKANFDLHYSNDLKL FVNINDEHLNEFLQKRAVQEGVF
NFSVVGSSTDYFEGEFNFKDTFIRD LKGVNQLISFIDTVPSLLMFKTPTFNEKGLSLH
DGRVVFNRKDLLSFEAINLNGDSMDLYGLGSANLRLNTVDVDLELKTLSASETISK
VPILNYVILGKNQEISTNIKVDGALDNPKFHTQILSDTLKTPFNLIKNIQLPSNLFN
"

```

gene 176550..177455  
 /locus\_tag="DMACINML\_00171"  
 CDS 176550..177455  
 /locus\_tag="DMACINML\_00171"  
 /inference="ab initio prediction:Prodigal:2.6"  
 /inference="similar to AA sequence:RefSeq:EAQ73356.2"  
 /note="conserved hypothetical protein"  
 /codon\_start=1  
 /transl\_table=11  
 /product="hypothetical protein"  
 /protein\_id="Prokka:DMACINML\_00171"  
 /translation="MIFILGIFYLTLQPLKSNSVFLPQGSIAQIITHLKQNKYEMNS  
 IDKYILFFLGHQPQSGWINIGTKELNRIEFLHKLTIKAALETTLIPGETSVIFLEQA  
 AQQLELDKNTLLAEFEKQATYKEGVFLPETYKIPKGITEALLIQVLLKHAENTNRKTS  
 EKIFGEYNAKKWHQYIITASVIQKEAANESEMPIVASVIYNRIKKGKMLQMDGTLNYG  
 IYSHAKITPQIRIQDNSSYNTYKFEGLPKEAVCNVLSAIRAAIFPAKTDYLYFVRDK  
 ATGAHIFSTNLNDHNKAINLQKTNN"  
 gene 177527..177958  
 /gene="flgB"  
 CDS 177527..177958  
 /gene="flgB"  
 /locus\_tag="DMACINML\_00172"  
 /inference="ab initio prediction:Prodigal:2.6"  
 /inference="similar to AA sequence:RefSeq:CAL34674.1"  
 /codon\_start=1  
 /transl\_table=11  
 /product="flagellar basal-body rod protein"  
 /protein\_id="Prokka:DMACINML\_00172"  
 /translation="MINPFSKELITSALAGRNLRNQLINANLANVDTPFYKARDIEF  
 ETALVNRANEIFKKNNDKELQLAITEEGHQKPKWFPDPSKSTIYLRDGHLLARNDANTV  
 DLDVETTEMKNTVMITALDGVLRQRSNIFSSILDASSKLS"  
 gene 177968..178462  
 /gene="flgC"  
 CDS 177968..178462  
 /gene="flgC"  
 /locus\_tag="DMACINML\_00173"  
 /inference="ab initio prediction:Prodigal:2.6"  
 /inference="similar to AA sequence:RefSeq:CAL34673.1"  
 /codon\_start=1  
 /transl\_table=11  
 /product="flagellar basal-body rod protein"  
 /protein\_id="Prokka:DMACINML\_00173"  
 /translation="MAYLSDFDISGYGLSAQRFRMNVISSNIANANTTRTAEGGPYRR  
 REVIFKATDFDKLLNEQINKDNNFLKYENPLNDPSSPEEAKPAIQSVVVDKVVRRDDKD  
 FRMKYDPSHPDANAQGYVAYPNVNPVIEMADLIEATRAYSANVSAFTSAKTIAQSAID  
 LLRG"  
 gene 178469..178768  
 /gene="fliE"  
 CDS 178469..178768  
 /gene="fliE"  
 /locus\_tag="DMACINML\_00174"

```

/inference="ab initio prediction:Prodigal:2.6"
/inference="similar to AA sequence:RefSeq:CAL34672.1"
/codon_start=1
/transl_table=11
/product="flagellar hook-basal body complex protein"
/protein_id="Prokka:DMACINML_00174"
/translation="MNNINDLRLNNSISNTNKSQNSSDRIGDEFKMLKNEIEDLDKT
QKTAEAMTDIATGQVKDLHQAAIAITKAESSMKFMLEVRNKAISAYKEITRTQI"
gene 178774..180579
      /gene="pbpB"
      /locus_tag="DMACINML_00175"
CDS 178774..180579
     /gene="pbpB"
     /locus_tag="DMACINML_00175"
/inference="ab initio prediction:Prodigal:2.6"
/inference="similar to AA sequence:RefSeq:CAL34671.1"
/codon_start=1
/transl_table=11
/product="putative penicillin-binding protein"
/protein_id="Prokka:DMACINML_00175"
/translation="MQEHKKNRVSKVAFAYCMALFFMIIFLSSTFFLTSCRHIPNTEK
DQYSIALRGNIIITKDNFTITSSRQIYRAEIDLR SINKDKFDLFLKLFQIYSGISDSEI
ADIKKRIQKQKKRSYHFILSQLDSKQASYLKDLAKKLYIQGFFKAFTNNLGAETRG
LSIIIEHEEDRIYMSKDALTPAIGYTKMVLDPQSGILKNVGVKGLEKYDACLNPLQNE
KIQGLKDIGNIILNLSLQKKIDGCLLYLNISLKLQKSIEKAIDGRNEDLKANEII
VGVMSKTGQILALASSRRYDPQNRGKDL SVLNASAI EYGYEAGSVIKPFI FTALRL
GK LKTDEVINTYGGAYKLGRFTIRDDHKMDQMTMEEVIRYSSNIGMIQIAKRLSNLEI
IAGLKIFKFGKSGIDLPEYQKGEIPNSKRLRDIEKSVLSYGYGLKTTFIQLLAAYNV
FNNNGVYITPHLAEKFYQDGRFVSL EEDIKKEVILTPQAAQTMQKILIDVIEKGTGKK
AITQGI IIGGKTGTARIAERQGYTSNRYNASFFGFANDAKHNYTIGVLRNPTKPYSY
YAAQSALPMFKDVVDILINEDFLTPVIVENNQTLN"
gene complement(180572..182374)
      /locus_tag="DMACINML_00176"
CDS complement(180572..182374)
     /locus_tag="DMACINML_00176"
/inference="ab initio prediction:Prodigal:2.6"
/inference="similar to AA sequence:RefSeq:EAQ72995.1"
/codon_start=1
/transl_table=11
/product="Na/Pi-cotransporter, putative"
/protein_id="Prokka:DMACINML_00176"
/translation="MKSLEDRVQEDKNFLKYLKISFCGIFTLILIFALIRFSEFANLL
AGVAILLIGMTNLSLGFKSFSGLLERILTRSTNTKFKSILFGAISTLIMQSSTLVSI
ISLSFLSAGLISL TAGVGIIIFGANLGNTASSWLIVWLTRVNISILAIPLLVIGVLF
QKDNI IKSFGNIFIGIGFFLGVDIKNGFN EFQDAIDL SYFDFTGFKGV LIFVGLGA
LLTGIIQSSTATIAIIVAALLAGQISFENSLAATLGTSVGGVTVAVLASLSTNVEGKK
LAFANCIFNFTIAIIIIAIFPYFIDFLNGIAGILNIENLALKMALFHTLFNLLGIFVF
VLFIPQLVNF LNKSVKASKDKNKDRPLYLDSNLLKFSDTAIEALRKESEHLYDNAYAI
IAHAIGLSRKDIQSNKSFEEILQNKWFSRNVLDLYLQTRIKVLF EAIIDFSTKAQI
HIDDELKNHRIFTFKIAAKNLTEATKNLKL VQENIKKYSNCNNKDLALEYNKIRSNLG
ELLRSIQELRAVDDEKMYLIIKNLQKGKEILKEIDGLTLNNVEHLILVRKITTAEGIS
IINDTSFIAKIAKDLIDAVEIIFAREKVLWDDIN"
gene complement(182355..182789)
      /locus_tag="DMACINML_00177"

```

CDS complement(182355..182789)  
 /locus\_tag="DMACINML\_00177"  
 /inference="ab initio prediction:Prodigal:2.6"  
 /inference="similar to AA sequence:RefSeq:CAL34667.1"  
 /codon\_start=1  
 /transl\_table=11  
 /product="putative membrane protein"  
 /protein\_id="Prokka:DMACINML\_00177"  
 /translation="MIGLYLLIAALSFLLLYFALKKLTLNIDEKALLEPIKSDIYPKF  
 CDIIDERIREFKDRIQNNSSALKDQDRKDELLEKLGDL SRELTFIQTMNLSNKS DSVW  
 QNELFDLKELENLLLEYLENGE EEAENLRENLMSEFEKLRG"

gene complement(182786..183106)  
 /locus\_tag="DMACINML\_00178"

CDS complement(182786..183106)  
 /locus\_tag="DMACINML\_00178"  
 /inference="ab initio prediction:Prodigal:2.6"  
 /inference="similar to AA sequence:RefSeq:CAL34666.1"  
 /codon\_start=1  
 /transl\_table=11  
 /product="putative rhodanese-like domain protein"  
 /protein\_id="Prokka:DMACINML\_00178"  
 /translation="MITNLPASVWMKQDLSEYQIFDVRTPAEWEEGVLPHAECVALYD  
 NHGLLNANFLEEFQTRRDKNKKLAFICRGGHRSMM AANFIKNELGLESVNLDGGMLAL  
 KGWI"

gene complement(183103..184932)  
 /gene="htpG"  
 /locus\_tag="DMACINML\_00179"

CDS complement(183103..184932)  
 /gene="htpG"  
 /locus\_tag="DMACINML\_00179"  
 /inference="ab initio prediction:Prodigal:2.6"  
 /inference="similar to AA sequence:RefSeq:CAL34665.1"  
 /codon\_start=1  
 /transl\_table=11  
 /product="hsp90 family heat shock protein"  
 /protein\_id="Prokka:DMACINML\_00179"  
 /translation="MQFQTEVNQLLQLMIHSLYSNKEIFLRELVSNSSDALDKLNFLS  
 VSDDKYKSLKFEPRIKIGKDKKTLTISDNGIGMDKDDLINNLGTIAKSGTKSFLN  
 LSGDAKKDSQLIGQFGVGFYSAFMVASKIEVLSKKALDDKAYLWISDANGYEIEDATK  
 EEQGTSITLYLKDDEFANSYKIESIIEKYSNHIQFPIMEKEEFIPAKEGEEEGKTEL  
 KISQINKANALWRMQSSLKAEDYERFYEQNFHDSNKPLLYLHTKSEGLKLEYNLFFI  
 PQNAPFDLYRVDYQSGLKLYVKRVFISDDDKELLPTYLRFVRGII DVEDLPLNVSREI  
 LQENQILKGVKEASVKKILSELEKLNKDKKEYLSFFKNFGKVLKEGLYGFGEKDSL  
 LKLMLYKSTKGESLRSLEEKNDIQGEQKEIFYIIGSNESLLRNSPLLEEYKQKNIEV  
 LLMDDEIDSLVTPMLGEYGLKFVAINQVEDKNELSDEEKNEFASLVAKFKELLDQV  
 EDVRLTSRLKDSPSCIVYDKNKPDFAMQQLLKQMGQE QNFKPILEINPKHAI FTGLKN  
 NETFSADIATLVLNMAKLSEGMGVDNPAEFNASLTKIITKAFS"

gene complement(185005..185373)  
 /gene="crcB"  
 /locus\_tag="DMACINML\_00180"

CDS complement(185005..185373)  
 /gene="crcB"  
 /locus\_tag="DMACINML\_00180"  
 /inference="ab initio prediction:Prodigal:2.6"

```

/inference="similar to AA sequence:RefSeq:CAL34664.1"
/codon_start=1
/transl_table=11
/product="CrcB protein"
/protein_id="Prokka:DMACINML_00180"
/translation="MLNTILVVGFGGFIGAVLRMLSINLINKILPHSISFGTLFVNIL
GSFMMGLLFSYAHHKGLSPAIKSFVSTGFLGAFTTFSTFSYENLLLLQSGNYFNFSLN
ILFNIIILCLIAVWLGFIIFK"
gene      complement(185367..186068)
          /gene="plsC"
          /locus_tag="DMACINML_00181"
CDS      complement(185367..186068)
          /gene="plsC"
          /locus_tag="DMACINML_00181"
          /EC_number="2.3.1.51"
          /inference="ab initio prediction:Prodigal:2.6"
          /inference="similar to AA sequence:RefSeq:CAL34663.1"
          /codon_start=1
          /transl_table=11
          /product="putative 1-acyl-SN-glycerol-3-phosphate
acyltransferase"
          /protein_id="Prokka:DMACINML_00181"
          /translation="MKVVIYKKIKALYFWLFFIISVAFVVLFCFCIKSQDTLWKLKRS
WARFQKNILFCKYEVIGEFNLSANMILMNHQSTLDIIALEDLYPKNLWCWIAKKELGEI
PLFKIAIKKPKLLCIDRKNPRDLVRVLKEAKQRLGEDRVLAIFPEGTRSRNEKLLKFQ
SGAKVLSDKLDLKVQPILIVDSAKILDTSFSASSGVLKIICMDLVDTSDDKWLENT
KKMQELLDQERAKLC"
gene      complement(186040..187239)
          /locus_tag="DMACINML_00182"
CDS      complement(186040..187239)
          /locus_tag="DMACINML_00182"
          /inference="ab initio prediction:Prodigal:2.6"
          /inference="similar to AA sequence:RefSeq:CAL34662.1"
          /codon_start=1
          /transl_table=11
          /product="putative periplasmic protein"
          /protein_id="Prokka:DMACINML_00182"
          /translation="MRIILFLVFCFSLFARSEISVFDGQDENMQKELQKLPKEEQQI
YQNIAPSDENSDFDSNIYDPFIPQSSLVLTDDYVNVKVVYVGEAFPIILHAKTTEDTNF
DFNITLQKSKDLVFLNPDLKWEYIKGDYRAVLWFEAKTSNANLEQISVSLLRNGKVFQ
SASISIGAIQFENTPNNKNFVSHLVASSLEVKKIKTSYFDDSNIIITMIELSATNTNLKS
FFVNGVEKQGIENLKGDFNSSNAFYAIFPSTKTDFFSYFNKDKKMEMNSFKLKIS
DDEVSTQSDLNPTNRDFNIYKQYALWALTILALWFVWKKNYFILAGALLCFILGFLV
DTNTENAILKAGSRAKILPTESSTYFYTANSNEKVEVLGKRLHYVKVLFQDGRIGWVE
SSDLQKN"
sig_peptide complement(187189..187239)
          /locus_tag="DMACINML_00182"
          /inference="ab initio prediction:SignalP:4.1"
          /note="predicted cleavage at residue 17"
gene      complement(187236..187880)
          /gene="purQ"
          /locus_tag="DMACINML_00183"
CDS      complement(187236..187880)
          /gene="purQ"

```

```

/locus_tag="DMACINML_00183"
/EC_number="6.3.5.3"
/inference="ab initio prediction:Prodigal:2.6"
/inference="similar to AA sequence:RefSeq:CAL34661.1"
/codon_start=1
/transl_table=11
/product="phosphoribosylformylglycinamide synthase I"
/protein_id="Prokka:DMACINML_00183"
/translation="MKVAIIRFPGTNCFDFTQYAFEKIGVKAQVWHEEKEINADLVV
LPGGFSYGDYLRCAAIKIPAMQGVIAHAKRGGYILGICNGFQILLESGLLEGAMKH
NNLSFISKQNLRVVSNVFLKNFKKDEIINLPIAHGEGNYADEATLKKMQDKDL
ILLKYEPNPNQSVLDIAGICDENKKIFGLMPHPERACDKILGNDIGLRMLEGFM"
gene complement(187880..188125)
/locus_tag="DMACINML_00184"
CDS complement(187880..188125)
/locus_tag="DMACINML_00184"
/inference="ab initio prediction:Prodigal:2.6"
/inference="similar to AA sequence:RefSeq:CAL34660.1"
/codon_start=1
/transl_table=11
/product="phosphoribosylformylglycinamide (FGAM)
synthase"
/protein_id="Prokka:DMACINML_00184"
/translation="MKIVVNVFLKNGVLDPPQGAIEKALHSLNFNEVKEARVAKQIIL
DLDESNEQKAKERVKSMCEELLVNSVIEDYELIVSEK"
gene complement(188134..188844)
/locus_tag="DMACINML_00185"
CDS complement(188134..188844)
/locus_tag="DMACINML_00185"
/EC_number="6.3.2.6"
/inference="ab initio prediction:Prodigal:2.6"
/inference="similar to AA sequence:RefSeq:CAL34659.1"
/codon_start=1
/transl_table=11
/product="phosphoribosylaminoimidazole-succinocarboxamide
synthase"
/protein_id="Prokka:DMACINML_00185"
/translation="MKKELLYEGKGKLYATEDENFLISEFKDDLAFNAEKRGSSES
GKGALNCKISTELFHLLEKNGIKTHLVETINDNEQVIKCKIPIEVIVRVNATGSLT
KRLGIKDGTVLPLVFLVEFCLKNDELGDPFINDEHCLILNLVQNEAQIKEIKEMAKKIN
AILSPFFDAKNLRLIDFKIELGLTKDNELVLADEISPDSCRFDKFSNEKLDKDRFRQ
DLGNVKMAYEEVLKRILN"
gene complement(188847..190169)
/locus_tag="DMACINML_00186"
CDS complement(188847..190169)
/locus_tag="DMACINML_00186"
/inference="ab initio prediction:Prodigal:2.6"
/inference="similar to AA sequence:RefSeq:CAL34658.1"
/codon_start=1
/transl_table=11

```

```

/product="putative secreted protease"
/protein_id="Prokka:DMACINML_00186"
/translation="MSSKRFLAAITGFTGSLALCVFLASNLQAKPKNQSDLMQQRLES
LDKLTKT LAIVEQYYVDDENITDLIDKSLSGLLSNLDAHSSFLNEKDFNDMKIQTSGE
FGGLGITVGMKDGALTVISPIEGTPADKAGIKSGDIILKINDEATLGINLNDAVDKMR
GKPKTQITLTIFRKGATKPFVALTRDIIKVESVYAKLIENENILYLRVTNFDKNVVD
MTSKELKKHPDVKGVILDLRNNPGLLNQATGLVNLFVDKGVIVSQKGRVTSENQEYK
ANPKNKISDSSLVVLVNGGSASASEIVSGALQDLKRAIIVGENTFGKGSVQIIPINE
TEALRLTIARYLPSGRTIQAVGVKPDIEVFPGKVNTQEDSFNIKESDLKQHLESELE
KLDKNEKKEDKKEQKNDKNIITQKQINDDAQLKSAIDTIKILNIKQGG"
sig_peptide complement(190080..190169)
/locus_tag="DMACINML_00186"
/inference="ab initio prediction:SignalP:4.1"
/note="predicted cleavage at residue 30"
gene 190328..190609
/locus_tag="DMACINML_00187"
CDS 190328..190609
/locus_tag="DMACINML_00187"
/inference="ab initio prediction:Prodigal:2.6"
/inference="similar to AA sequence:RefSeq:CAL34657.1"
/note="conserved hypothetical protein Cj0510c"
/codon_start=1
/transl_table=11
/product="hypothetical protein"
/protein_id="Prokka:DMACINML_00187"
/translation="MKHTHTHSPKHIKAISNRLSRTIGHLEAIIKMMVERDEDCSDILI
QLAAVKA AVNNTAKAILKEHLAHC MYHAVMEKDTQSIEDLNKAIDMFVK"
gene 190746..193319
/gene="clpB"
/locus_tag="DMACINML_00188"
CDS 190746..193319
/gene="clpB"
/locus_tag="DMACINML_00188"
/inference="ab initio prediction:Prodigal:2.6"
/inference="similar to AA sequence:RefSeq:ABS44657.1"
/codon_start=1
/transl_table=11
/product="ATP-dependent chaperone protein ClpB"
/protein_id="Prokka:DMACINML_00188"
/translation="MANIQEFLDNMLSNLESAASLAHSKNNEVVPLHLLWALIVDS
SSILNQICNKFNISKEALELEIKSKISNLATSSNVNRENMRFSNEFINLESAGLMS
ANGDNYLSVDTWLISESEKNPIREILAKFIDIKEFQKELQNL RAGRKIESKTSDETLD
SLNKFGIDL TAKASEGKLDPVIGREEEIERLMQILIRKTKNNPILLGEPGVGKTAIVE
ALAQR I IKKDVPSLQNKKVIALDMSALIAGAKYRGEFEDRLKAVVNEVIKSENIIIF
IDEIHTIVGAGASEGSM DAANILKPALARGELHTIGATTLKEYRKYFEKDAALQRRFQ
PVNVGEPVNEALAML RGIKEKLEIHHNVTINDSALVAAAKLSKRYIADRF LPDKAID
LIDEAAAELKMQIESEPSSLRKVRKD IETLEVENEALKMENDEKNQKRLDEISKELAN
LKEKQSALNSQFENEKAVFDSISAKKKEIDSLKNEAVFAKNKGEFQKAAELEYGK IPE
CEKEVANLEEKWKMS ENGVLLKNQVDEDLVAGILSKWTGIVSVQKMLTSEKQKFLVE
KHLKESVIGQDKALSALARA I KRNKAGLNADNKP IGSFLFLGPTGVGKTQSAKALAKF
LFDDEKAMIRFDMSEFM EKHSVSRL LGAPPGYIGHEEGGELTEAVRRKPYSVLLFDE V
EKAHKDVFVNL LGILDDGRATDSKGVTVDFKNTIIILTSNIASSAIMNLSGKEQEDAV
KNELKNFFKPEFLNRLDDIITFNPLGKDEAYEIVKLLFKDLQKSL ENKG I KASLENA
ALLIAKDGFDPDFGARPLRRAIYDLIEDKLSDMILADKLDENDEI I IDAKNDEIVIEK

```

V"

gene complement(193364..195295)  
/gene="pbpA\_1"  
/locus\_tag="DMACINML\_00189"

CDS complement(193364..195295)  
/gene="pbpA\_1"  
/locus\_tag="DMACINML\_00189"  
/inference="ab initio prediction:Prodigal:2.6"  
/inference="similar to AA sequence:RefSeq:CAL34655.1"  
/codon\_start=1  
/transl\_table=11  
/product="penicillin-binding protein"  
/protein\_id="Prokka:DMACINML\_00189"  
/translation="MKILKYIFSFFVMCFIAAFVYVAYLFTNADTQGYTFKEYKPPLT  
TQIYDRNGKLVANIFEQHRFYANYEELPPRLIEALVAIEDTSFFEHDGVNIDAI FRAV  
VKIIKSGGKTMEGASTLTQQFIKNTLTPERTITRKIREALLAYKMETILSKEQILER  
YLN YIFFGHGYGVKTA AQGYFHKNLNELSLKEIAMLVGMKPAPSSYDPTKHLDL SIA  
RANNVARMYTLGWISKA EYDEAMKEIPQIYDDTLTQNAAPYVVDEVIKQLSPSIKDL  
KTGGYKITLNIDL DVQEMAQNALKFGYDEIVKRDKDANLSTLNGAMVVVNHQSGD VLA  
LVGGVDYEKSNYNRATQSTRQPGSSF KPFVYQA AINLGYSPVSEIADISRIFEGGAGD  
NKDWKPKNDGGKFLGLITLKEALTRSRNLATINLALNMGLDVLHSKLVEFGFRDIPAN  
LSIVLGSFGISPLEYSKFYTMFGNYGVIKEPQIIRQVQDRNDQIIMEFNSNEYRV SDE  
AQSF LVLDMMRNVVEHGTGRNARVEGIEIAGKTGTTNKNIDAWFCGLTPEIEALI WYG  
NDNNKPMRYTEGGARTSAPVREFLNKYLDKFPDTRKFSIPNGVYRGSYKGNAYYT  
IKSPLPRANMKFNESEILF"

gene complement(195292..195843)  
/gene="maf"  
/locus\_tag="DMACINML\_00190"

CDS complement(195292..195843)  
/gene="maf"  
/locus\_tag="DMACINML\_00190"  
/inference="ab initio prediction:Prodigal:2.6"  
/inference="similar to AA sequence:RefSeq:CAL34654.1"  
/codon\_start=1  
/transl\_table=11  
/product="Maf-like protein"  
/protein\_id="Prokka:DMACINML\_00190"  
/translation="MLILASSSVSRNLNLLKEAKIEFQQISFDYDENL DKNL KPSVYVQ  
KIVLEKERQFCTAYEEKFKDKTLLFADSIVCIGDKILTKANTKEEAYEMLDLQDGKCA  
SILSAFLLKNSKRVFSLSKTTL YFSKFDPHDLKDYVENGLYK GKAGAIMCEGFHKNY  
IIKQEGNLNTALGLDTQNLKAYL"

gene complement(195847..198375)  
/gene="alaS"  
/locus\_tag="DMACINML\_00191"

CDS complement(195847..198375)  
/gene="alaS"  
/locus\_tag="DMACINML\_00191"  
/EC\_number="6.1.1.7"  
/inference="ab initio prediction:Prodigal:2.6"  
/inference="similar to AA sequence:RefSeq:CAL34653.1"  
/codon\_start=1  
/transl\_table=11  
/product="alanyl-tRNA synthetase"  
/protein\_id="Prokka:DMACINML\_00191"



```

/translacion="MDVRSEYLNFFKSKGHEITPSSPLVPDDATLLFTNAGMVPFKSI
FIGEVPRPNPPRKTSQCQCIRAGGKHNDLNDVGYTARHHTFFEMLGNFSFGDYFKEQA
IAYAWFVTEVLKLPKDRLVYTVHESDDEAFELWQKHIQKERIYRFGDKDNFWQMGDT
GPCGPCSEIFYDQGEYFNGEEDYMGDDGDRFLEIWNLVFMQYERSADGKLTPLPKPS
IDTGMGLERVTAIKEGKFSNFDSSLFMPPIINEIAKLCGKTYVYESGASFRVIADHIRS
SVFLLAQGTSFDKEGRGYLRRILRRALRHGYLLGLKKPFMYNLVDVCKLMGDHYTY
LNEKKDFIKEQIRLEERFLSTIENGIEIFNEELKNTKEVFSGEVAFKLYDITYGFPLD
LTQDMLREKNLVDEAKFEELMNEQKNRAKASWKGSGDKVASGDFKNLLEKFGENCFV
GYEKTECQATVLALLDEDFKEVSSLKGLGWMLDNTPFYATSGGQIADTGYIGTSEVL
DTQKFFNLNLSLVKANEEIKLNDKIIAKIDTDKREQTARHHSATHLLHHALREILGSH
ISQAGSLVESNKLRFDFTHKALSKEELESIEKRVNEMIISSSEAILENMPLEDAKKS
GAIALFNEKYQGNVRVLTLGESKELCGGTHVKNTAQIGSFYIVKESGVSAGVRRIEAV
VSRAALEFCKTFMNENLNLKEELKSNDSLGLVKKLKNEILKLNELKNSNKSQLNSSN
INGVQICVECVESGDIKTMIDEFKKNFEKAAILLIQAKDDKITLAAGVKNCPLKAGNL
VKNIAQILGGNGGRRDDFATAGGKDISKIDEALKQALDLIQKGL"
gene 198492..199571
/locus_tag="DMACINML_00192"
CDS 198492..199571
/locus_tag="DMACINML_00192"
/inference="ab initio prediction:Prodigal:2.6"
/inference="similar to AA sequence:RefSeq:CAL34652.1"
/codon_start=1
/transl_table=11
/product="putative aminotransferase (degT family).
Functional classification-Misc"
/protein_id="Prokka:DMACINML_00192"
/translation="MNFINLQAQYLKYKEEIDSEIASVLSSSSFIGGAKLNEFETNLA
QYTHVQHAIGCSSGTSALYLALRALDIKQGDEVIVPSFTFIATAEMVALLGAKPVFVD
INLDFNIDFELLKNAISPCKAIIAVSMFGQMSNLQELNTFCESKNISLIEDGAQSF
GASFKEKSCSIAKISCTSFPPSKPLGAYGDGGAIFCNDESIKLRILLNHGQTDTRY
KHEFIGINARLDTLQAAILNAKLKHLDEEINKRQEIAKFYENLNTNCQIPKIDENAI
AYAQYSVLVEDRARVIKAFKANIPYAIHYPTPLHKQPCFSEFSLKLEKSEFASEHI
LSLPFSAFLSQSEQESVIKIFKEGL"
gene 199568..200680
/locus_tag="DMACINML_00193"
CDS 199568..200680
/locus_tag="DMACINML_00193"
/inference="ab initio prediction:Prodigal:2.6"
/codon_start=1
/transl_table=11
/product="hypothetical protein"
/protein_id="Prokka:DMACINML_00193"
/translation="MKLDQVGSFLRPKILKEARENFALGKIDEEQLRSIEDSCIRDLL
EECDKAGIYYLSDGELRRSWWHLDFYWGFGGKIKKIKKEKGYIFKGIETRAEGIEIESK
IECNNHPFLKDFERLQIAKGLKIDTNRLLKLTIPSPSMLLYMLFIRGGKNTEFNYYGT
DFTKLNKNDILNAYENFYKEFAALGGVYLQLDDTSFGSLCDYEFALNEINADDICEEY
VDFLNESLKTMPKNIMSIAIHICRGNYSRYVASGGYMKVAKKLFELRVNKKFFLEFDD
ERAGDFEPLKYINDQIAVLGILTSKTNESPSVEELKARVKIAAQFLSPKQIEISTQCG
FSSTEEGNEIFTHSQWEKIKLLKQVLSELENEGFFS"
gene 200677..201531
/locus_tag="DMACINML_00194"
CDS 200677..201531
/locus_tag="DMACINML_00194"
/inference="ab initio prediction:Prodigal:2.6"

```

```

/inference="similar to AA sequence:RefSeq:APU82387.1"
/codon_start=1
/transl_table=11
/product="oxidoreductase"
/protein_id="Prokka:DMACINML_00194"
/translation="MKIGIIGLGKMGQNLNELGKNKNFKINALFDMVENKNLNAPFF
TNLDEFLNQDNDIIIIATPTNSHLEIARKVFCKCKCVLIEKPLALNLNEIDEISNLAK
DHDVKVGVGFCERFNPAVLALKKELQNEEIIISINIQRSTYPQRISDVGILQDLAVHD
LDLLHFLSGEKIINANILKSFNKDKQREDESIIITCKLEKTIACVHQSWNSTQRLRKIT
LVSKNHFYEANLADFSLSKDGQSLELMTQTPLFGEHMALYDLFLNKENYLANIQNAYA
VQEILEEF"
gene      201661..202572
          /gene="hemH"
          /locus_tag="DMACINML_00195"
CDS      201661..202572
          /gene="hemH"
          /locus_tag="DMACINML_00195"
          /EC_number="4.99.1.1"
          /inference="ab initio prediction:Prodigal:2.6"
          /inference="similar to AA sequence:RefSeq:EAQ73002.1"
          /codon_start=1
          /transl_table=11
          /product="ferrochelatase"
          /protein_id="Prokka:DMACINML_00195"
          /translation="MKLVLFLLMGGATNLQDCETFLKNMFNDPYILGIKNKFIRRFVA
WIITKSRVKAMRENYQMGGKSPLNELTQSLCEKLNATKDFKDFVNLVYPPFANEV
LQKYTLNENDEIILFPLYPHHSSTTVTSSLEVLQNEISKQNIKAKVKTMDFYENTLY
NEMIISHILAKKSEFDAKTLIFSAHSLPQSIIDKGDLYEKHVNHHVELLKERLKDHF
EIIAYQSKLGPVKWLEPNTSDILANLDNKALIYPISFCIDCSETIFELGIEYKHLAK
CDYDLITCPNDSDEFAQFVLKYLSDFN"
gene      complement(202645..203880)
          /locus_tag="DMACINML_00196"
CDS      complement(202645..203880)
          /locus_tag="DMACINML_00196"
          /inference="ab initio prediction:Prodigal:2.6"
          /inference="similar to AA sequence:RefSeq:ADT65846.1"
          /codon_start=1
          /transl_table=11
          /product="ammonium transporter, degenerate"
          /protein_id="Prokka:DMACINML_00196"
          /translation="MNAINSSFIVLCTLLVLLMTPALAMFYSGMVRSKNTLNTIMNCF
IVFGVITLQWVVLGFSLSFGKDEGLGLVGNFENFLLEGISGYNASGVPNIFVIFQMM
FALIASAIITGSLVGRIKLGVLVIFLLFWSTLVYDVLAHMIWSSEGFLLKRGSLDFAG
GGVVHISSGVAGLVGALMVGARKSDDKNAHSIPYAFLLGAILLFIGWLGFNAGSAGE
MNDIAINAFIVSIIISAACGFLSWVLEWL IHHKPTILGGLSGLVAGLVGITPACGYVD
IYASLVIGALSSVFCYFGLSFIKYKWKDDSLDAFSLHGIGGIWGGIATGLFASAKVN
PNVIAQNALGEGFFISGSLELLKEQIFAIVICVVL SALISFIIFKIISCFTDLRVKEE
VEQKGLDVSLHGEKAYTLA"
gene      complement(204195..205193)
          /locus_tag="DMACINML_00197"
CDS      complement(204195..205193)
          /locus_tag="DMACINML_00197"
          /inference="ab initio prediction:Prodigal:2.6"
          /inference="similar to AA sequence:RefSeq:AJK70653.1"

```

```

/codon_start=1
/transl_table=11
/product="tRNA 2-selenouridine synthase"
/protein_id="Prokka:DMACINML_00197"
/translation="MLNEVDFTEFQKENFSLIDARSPREFLHSHLIGALNFYALNDE
EYQEIGTIYKKNQALAKARGASYICQNMSKHILELTQKFRIGDKIGIYCSRGLRSKS
IAVILSELGYRVVRLKGGFKAYRSFLAHYFDNEINLDFALCGNTGCGKTELLELLPH
HLNLEKMANHLGSSFGDILGAQPTQKAFEASLFHVLNSLKDFIFIESES RKIGEIVLP
LKLYEKMQKAFKIHCFCSLEKRIDRIQKIYQEKMTPLKFKECLAKISPYISVNFQRDL
LKSIEQREWQRLIALLLAYYDKSYKKPKQIDFELNTDDIFKAKEELLGYFKTQLLF"
gene complement(205183..205668)
/locus_tag="DMACINML_00198"
CDS complement(205183..205668)
/locus_tag="DMACINML_00198"
/inference="ab initio prediction:Prodigal:2.6"
/inference="similar to AA sequence:RefSeq:AJK70652.1"
/codon_start=1
/transl_table=11
/product="HIT family hydrolase"
/protein_id="Prokka:DMACINML_00198"
/translation="MQYLYAPWRSEYFEKEKSECPFCDCANKIKSDEELGVIFRAKHC
FGVMNRYYPYSAGHFMIIPYLHEEHIENLSDEVWQEISKFVRLGVRILKSELHAGGVNI
GMNLSKDAGAGIAPHCHYHLVPRWAGDTNFITTIGETRVCGTNI EQVYQKLVLAFKNV
K"
gene complement(205679..206455)
/locus_tag="DMACINML_00199"
/EC_number="4.1.1.48"
CDS complement(205679..206455)
/locus_tag="DMACINML_00199"
/EC_number="4.1.1.48"
/inference="ab initio prediction:Prodigal:2.6"
/inference="similar to AA sequence:RefSeq:CAL34646.1"
/codon_start=1
/transl_table=11
/product="indole-3-glycerol phosphate synthase"
/protein_id="Prokka:DMACINML_00199"
/translation="MILDKIFEKTKEDLKERKAQLPYDVLGRSLASNPFFPKDVKAAL
KRVENEVRIIAEVKKASPSKGVIRENFDPLDIALKYEKNGAAAI SVL TEPHFFQGSLE
YLSMIRRYTRAPLLRKDFIFDEYQILEALVYGAD FVLLIARMLSMKELKRLLEFTRHL
GLEALVEIHDKEDLSKAIFSGADIIGINHRNLDDFSMDMNLCEKLIPQIPNSKIIIAE
SGLNKDFLRHLQNLGVDAFLIGEYFMRQNDEGEALKALL"
gene complement(206452..207729)
/locus_tag="DMACINML_00200"
CDS complement(206452..207729)
/locus_tag="DMACINML_00200"
/inference="ab initio prediction:Prodigal:2.6"
/inference="similar to AA sequence:RefSeq:AVL47691.1"
/codon_start=1
/transl_table=11
/product="ATP-dependent nuclease subunit B"
/protein_id="Prokka:DMACINML_00200"
/translation="MYRNLLFVLIGFFLTACGASKTVIAYPNYEQQSNEFDLRIMKA
YNYEYFNQYEEARDEFLALFRDYNITNFLENAFLLTLANNL DKKEEINNIAPYLDKS

```

DNLKRLSALYALNSYNLNEAQKLIIEELLKKKSDDPNLELYGDVLMRQNNLKDAIKYY  
 QLAYNQIQNEEILFKLVGVYAILNDTSSIKNILETSKNINGCTLKTCILLAKIYNDEG  
 NDKALQEIYIELYNITKNQSFILALIELLNAQNKDKEALHFALKYNVDDVVKLYLYQR  
 LKLYGKAKDLSMQIYKHTQEKEYLLRAAIFEFEEANLEKKITPQVITLVSEKFSDAID  
 ENSDALYLNYYGYLLIDYDLLEKGIKLVHLALKKEPQNLYYLDLSLAWGYKQGDCQK  
 AWEILKQTLEDKEFANSDESKAHAKAIKACIKP"

gene complement(207702..208076)  
 /locus\_tag="DMACINML\_00201"

CDS complement(207702..208076)  
 /locus\_tag="DMACINML\_00201"  
 /inference="ab initio prediction:Prodigal:2.6"  
 /inference="similar to AA sequence:RefSeq:CAL34644.1"  
 /note="conserved hypothetical protein Cj0496"  
 /codon\_start=1  
 /transl\_table=11  
 /product="hypothetical protein"  
 /protein\_id="Prokka:DMACINML\_00201"  
 /translation="MIFNKDFSYGFDENACQKCGGKCCTGESGNIFANKEELKALREH  
 LQLDEKEFALKYLKKGFRMSFKEVEFEDGFACIFFDKEKRNCIYDFRPMQCRTFPF  
 WEYFKTHQEELKKECIGICYLS"

gene complement(208066..208767)  
 /locus\_tag="DMACINML\_00202"

CDS complement(208066..208767)  
 /locus\_tag="DMACINML\_00202"  
 /inference="ab initio prediction:Prodigal:2.6"  
 /inference="similar to AA sequence:RefSeq:CAL34643.1"  
 /codon\_start=1  
 /transl\_table=11  
 /product="putative methyltransferase domain protein"  
 /protein\_id="Prokka:DMACINML\_00202"  
 /translation="MQDNIKLAQLNDGYRYNSDSL LADFLVLEMGVRNQVLEVGSGCG  
 IIGILLKKFVSNLDLSLLDIQQENIELIHRNLKQNNIQAEIFHEDFRNFQNNKKFDFI  
 VCNPPFYRDGAHESKNMHKNISKFKYLTLDDEFIARSNALLKPMGVLYFCYEALALDK  
 ICLALESKLLKLTIRFVHHTQNTQARLVLVQARKSVKSPCEILPPFFVYKNENLSEQ  
 MQEIHSRFRLESYDI"

gene complement(208770..208925)  
 /locus\_tag="DMACINML\_00203"

CDS complement(208770..208925)  
 /locus\_tag="DMACINML\_00203"  
 /inference="ab initio prediction:Prodigal:2.6"  
 /inference="similar to AA sequence:RefSeq:CAL34642.1"  
 /codon\_start=1  
 /transl\_table=11  
 /product="putative exporting protein"  
 /protein\_id="Prokka:DMACINML\_00203"  
 /translation="MLKFFVISLLSSLLFAQNFIDFASQNNVLKQEQNTSKENAPLK  
 RVKIPTH"

sig\_peptide complement(208872..208925)  
 /locus\_tag="DMACINML\_00203"  
 /inference="ab initio prediction:SignalP:4.1"  
 /note="predicted cleavage at residue 18"

gene complement(209003..209079)  
 /locus\_tag="DMACINML\_00204"

tRNA complement(209003..209079)

```

/locus_tag="DMACINML_00204"
/product="tRNA-Arg"
/inference="COORDINATES: profile:Aragorn:1.2"
/note="tRNA-Arg(cct)"
gene complement(209107..211182)
/locus_tag="DMACINML_00205"
CDS complement(209107..211182)
/locus_tag="DMACINML_00205"
/inference="ab initio prediction:Prodigal:2.6"
/inference="similar to AA sequence:RefSeq:CAL34641.1"
/codon_start=1
/transl_table=11
/product="elongation factor G"
/protein_id="Prokka:DMACINML_00205"
/translation="MSRSTPLKRVRNIGIAAHIDAGKTTT SERILFFTGM SHKIGEVH
DGAATMDWMEQEKERGITITSAATTCFWKDHQINLIDTPGHVDF TIEVERSMRVL DGA
VAVFCSVGGVQPQSETVWRQANKYGVPRIVFVNKMDRIGANFY NVEDQIRNRLKANPV
PLQPIGAEDNFKGVIDLVTMKALVWEDDTKPTDYVEKEIPA ELKEKAEYRTKMIEA
VSETSDELMEKYLGGEEELSLEEIKTGKAGCLSLSIVPMLCGT AFKNKGVP LLDVV
AYLPAPDEVANIKGEYEDGTEVSVKSTDDGEFAGLAFKIMTDP FVGQLTFVRVYRGCL
ESGSYAYNSTKDKKERIGRLLKMHSNKREEIKVLYAGEIGAVV GLKDTLTGDTLASEK
DKVILERMDFPDPVISVAVEPKTKADQEKMSIALNKLAQEDPS FRVSTDEESGQTIIS
GMGELHLEIIVDRMLREFKVEAEVGGPQVAYRETIRKTVEQEY KYAKQSGGRGQYGHV
FLRLEPLEPGSGYEFVNDIKGGVIPKEYIPAVDKGVQEALQNG VLAGYPVEDVKVTVY
DGSYHEVDSSEMAFKLAASMGFKEGARKAGAVILEPMMKVEVET PEDYMGDVIIDLNK
RRGQVNSMDERGGNKIITAFCLAEFMGYSTDLRSQTQGRATYSME FHDHYDEVPKNVA
EEIIKKRNNG"
gene complement(211195..211665)
/locus_tag="DMACINML_00206"
CDS complement(211195..211665)
/locus_tag="DMACINML_00206"
/inference="ab initio prediction:Prodigal:2.6"
/inference="similar to AA sequence:RefSeq:CAL34640.1"
/codon_start=1
/transl_table=11
/product="30S ribosomal protein S7"
/protein_id="Prokka:DMACINML_00206"
/translation="MRRRKAPVREVLDPDIYGNKVITKFINSLMYD GKKSTATTIMYG
ALELIDKKGGEKKGIDIFNDAIENIKPLLEVKSRRVGGATYQVP VEVRPARQQALAIR
WIISFARKRSERTMIDKLAEL LDAANSKGASFKKKEDTYKMAE ANKAFAYRW"
gene complement(211735..212118)
/locus_tag="DMACINML_00207"
CDS complement(211735..212118)
/locus_tag="DMACINML_00207"
/inference="ab initio prediction:Prodigal:2.6"
/inference="similar to AA sequence:RefSeq:CAL34639.1"
/codon_start=1
/transl_table=11

```

```

/product="30S ribosomal protein S12"
/protein_id="Prokka:DMACINML_00207"
/translation="MPTINQLVRKERKKVLEKSKSPALKNCPQRRGVCTRVYTTTPKK
PNSALRKVAKVRLTSGFEVISYIGGEGHNLQEHISIVLVRGGRVKDLPGVKYHIVRGAL
DTAGVAKRTVSRSKYGAKRPKASAK"
gene complement(212418..216968)
/gene="rpoC"
/locus_tag="DMACINML_00208"
CDS complement(212418..216968)
/gene="rpoC"
/locus_tag="DMACINML_00208"
/EC_number="2.7.7.6"
/inference="ab initio prediction:Prodigal:2.6"
/inference="similar to AA sequence:RefSeq:CAL34627.1"
/codon_start=1
/transl_table=11
/product="DNA-directed RNA polymerase beta' chain"
/protein_id="Prokka:DMACINML_00208"
/translation="MSKFKVIEIKEDARPRDFEAFQLRLASPEKIKSWSYGEVKKPET
INYRTLKPERDGLFCAKIFGPIRDYECLCGKYKKMRFKGVKCEKCGVEVANSKVRRSR
MGHIELVTPVAHIWYVNSLPSRIGTLLGVKMKDLERVLVYEAYIVENAGEAYYDNEST
KKVEYCDVLNEEQYNLMQRYENSGFKARMGGEVVRDLLANLDLVALLNQLKEEMTAT
NSEAKKKTIIKRLKVVENFLNSNLNANTNNEDAVPNRPEWMMITNLPVLPDLRPLVA
LDGGKFAVSDVNDLYRRVINRNRLLKLMELDAPEIIRNEKRMLQEAVDALFDNGRR
ANAVKGANKRPLKSLSEIIGKQGRFRQNLGKRVDFSGRSVIVVGPKL RMDQCGLPK
KMALELFKPHLLAKLEEKGYATTVKQAKKMIENKTNEVWECLEEVVKGHPVMLNRAPT
LHKLSIQAFHPVLVEGKAIQLHPLVCAAFNADFDGDQMAVHVPLSQEAIAECKVLMLS
SMNILLPASGKSVTVPSQDMVLGIYYLSLEKMGAKGSHKICTGIDEVMMALESKCLDI
HASIQTMVDGRKITTTAGRLIISILPDFVTENMWNKVLKKKDIAALVDYVYKQGGGLQ
ITASFLDKLKNLGFYATKAGVSISIAIDIIVPSDKQKAIDEAKQVREIQNSYNLGLI
TSGERYNKIIDIWKTNNTLSRDMMKLVEKDKEGFNSIYMMADSGARGSAAQISQLAA
MRGLMTPDGSIIETPIISNFREGLNVLEYFISTHGARKGLADTALKTANAGYLTRKL
IDVAQNVKITVEDCGTHEGVEINEITADSSIIETLEERILGRVIAEDVIDPITNSVLF
AEGTLIDEEKARILGESGVKSVNIRTPITCKAKKGICAKCYGINLGEGKLVKPGEAVG
IISAQSIGEPGTQLTLRTFHSGGTASTDLQDRQVSAQKEGFIRFYNLKTYKNEKEDI
VANRRNAAILLVEPKIKAPFKGIVNIENIHEDVIISIKDKKQEAKEYILRKYDLAKPNE
LAGVSGSIDGKLYLPYQSGAEVEENESIVEMIKEGWNVNPRIFFASEILVKDGPVVQ
NIKAGEKGIKIFYILKGDGLDRVRIKKGDIVKEKGFVWVADENDREAKRHYIPRES
RIEFNDSEEVNFDSSIIASAPKQEKSIIEAWDAYNNTIIAEIDGVVSFEDIEAGYSADE
QIDEATGKRSLVINEYLP SGVRPTLIIAGKGDKAVRYQLEPKTVIFVHDGDKISQADI
LAKTPKAAAKSKDITGGLPRVSELEFEARKPKNAAVIAEIDGVVRFDKPLRSKERLIIQ
AEDGTSAEYLIDKSKHIQVREGFEIHAGEKLTGQVSSHDLVKILGEKALHYLLISEI
QQVYRGGQGVVISDKHIEVIVSQMLRQVKIIDSQHTKFIIEGLVSRRKFREENERILRL
GGEPAAIAEPVLLGVTRAAIGSDSVISAASFQETTKVLTEASIAKGF DYLEDLKENVIL
GRMIPVGTGLYGEQNLKKEQE"
gene complement(216961..221088)
/gene="rpoB"
/locus_tag="DMACINML_00209"
CDS complement(216961..221088)
/gene="rpoB"
/locus_tag="DMACINML_00209"
/EC_number="2.7.7.6"
/inference="ab initio prediction:Prodigal:2.6"
/inference="similar to AA sequence:RefSeq:CAL34626.1"

```

```

/codon_start=1
/transl_table=11
/product="DNA-directed RNA polymerase beta chain"
/protein_id="Prokka:DMACINML_00209"
/translation="MLDNKLRNRLRVDFSNISKQIEIPNLLQLQKASFDYFLNLENGE
SGIEKVFKSIFPIHDPQNRSLSEYVSSEIGKPKYTIRECMERGLTYSVNLKMKIRLTL
HEKDEKTGEKVGIKDIKEQEIYIREIPLMTDRVSFIINGVERVVVNQLHRSPGVIFKE
EESSTVVKLVYTAQIIPDRGSWLYFEYDAKDVLYVRINKRRKVPVTMLFRALGYKKQ
DIIKLFYPIQTIHVKKDKFLTEFNPDMFMDRIEYDIKDEKGGKIIHQAGKRLTKKKAEQ
LIKDGLKWIEYPVEILLNRYLANPIIDKESGEVLFDSLTLLEDESKLAKIKEQKSFEIA
NDLANGVDAAIINSFAQDNETLKLKQSENIDDENDLAAIRIYKVMRPGEPVVKDAAK
AFVNDLFFNPERYDLTKVGRMKMNHKLGLEVPEYVTVLTNEDIKTKAYLIKVKNGKG
HIDDRDHLGNRRIRSIGELLANELHLGLAKMQKAIKDKFTSLNADIDKVMYPDLINPK
MITTTIIEFFTGGQLSQFMDQTNPLSEVTHKRRLSALGEGGLVKERAGFEVRDVHATH
YGRICPVETPEGQNIGLINTLSTYAKVNELGVEAPYRKVENGRVTDQVVYLTATQEE
GLFIAPASTKVDAGNIIIEEFVEARQDGETILARREEVQLIDLCSGMVVGVAASLIPF
LEHDDANRALMGSNMQRQAVPLITSSAPIVGTGMENIARDAAEAIKAKRGGVVEKVD
NKSIFILGEDEKGPFIHYIMEKNLRTNQNTNFMQHPIVKKGDVVKAGQIIADGPSMD
QGELAIGKNALIAFMPWNGYNYEDAIVSERRIREDTFTSVHIYEKEIEARELKDGIE
EITKDIPNVKEEDVAHLDESIGIAKIGTHIKPGMILVGKVSPKGEVKPTPEERLLRAIF
GEKAGHVVNKSLYATASLEGVVVDVKIFTKKGYEKDDRALKSYDKEKMSLEKEHHDRL
LMDREEMLRVCALLSKSALMSDQKIGDKNYTKGQKASLEDLEKINRFTLTTLIKAYS
KEVQKEYEELKNHFQNEKKLKAHDEKLEILEKDDILPSGVIKLVKVIYIATKRKLKV
GDKMAGRHGNGKIVSTIVPEVDMPYLPNGKSVDIALNPLGVPSRMNIGQILESHLGLV
GLRLGDQIQEIFDRKQKDFIKELRAKMLEICSIPLANEKEFIKNLSDEELLNARDW
SKGVKFATPVFEGVNIIEEFAKLFEIAKIDMDGKTELYDGRTGEKIAERVHVGCMYMLK
LHHLVDEKVVHARSTGPYSLVTQQPVGGKALFGGQRFGEVWALEAYGAAHTLREMLT
IKSDDVEGRFSAYKALTKGENVPATGIPETFFVLTNELKSLALDVEIFDKDEDNE"
gene complement(221207..221584)
/gene="rplL"
CDS /locus_tag="DMACINML_00210"
complement(221207..221584)
/gene="rplL"
/locus_tag="DMACINML_00210"
/inference="ab initio prediction:Prodigal:2.6"
/inference="similar to AA sequence:RefSeq:CAL34625.1"
/codon_start=1
/transl_table=11
/product="50S ribosomal protein L7/L12"
/protein_id="Prokka:DMACINML_00210"
/translation="MAISKEDVLEFISNLSVLELSELVKEFEKFGVSAAPVMVAGGA
AAGGAAAAAEEKTEFDIVLVDGGAKKIEVIKIVRALTGLGLKEAKDAVEQTPSTLKEG
VAKADAEAAKKQLEEAGAKVELK"
gene complement(221601..222080)
/gene="rplJ"
CDS /locus_tag="DMACINML_00211"
complement(221601..222080)
/gene="rplJ"
/locus_tag="DMACINML_00211"
/inference="ab initio prediction:Prodigal:2.6"
/inference="similar to AA sequence:RefSeq:CAL34624.1"
/codon_start=1
/transl_table=11
/product="50S ribosomal protein L10"

```

```

/protein_id="Prokka:DMACINML_00211"
/translation="MTRSEKVEIIAKLQEEFKISEAIVVCNYKGLSTKKLEELRNNAR
ENNKVQIINKNTLASIALNNSGKTGLVLKDTNIYLVGEDQLSVSKVAAKFEENNDKFE
IKTAHIEGEVADVAKVRALAKMPSRNELLAMLLQVWNAPITNFTIGLNALKNKKESE"
gene complement(222230..222931)
/locus_tag="DMACINML_00212"
CDS complement(222230..222931)
/locus_tag="DMACINML_00212"
/inference="ab initio prediction:Prodigal:2.6"
/inference="similar to AA sequence:RefSeq:CAL34623.1"
/codon_start=1
/transl_table=11
/product="50S ribosomal protein L1"
/protein_id="Prokka:DMACINML_00212"
/translation="MAKITRKLKELSKIDVSKEYALNEAIETVRNLKSAKFDETVEI
ALKLNVDPRHADQMVRGSLVLPAGTGKKVRVAVIAKDAKADAKNAGADIVGSDDLIE
EIQKGNMNFVDLIATPNLMGLVGKVGRIKLPKGLMPNPKTGTVTMDVAQAVNNAKSGQ
VNFVRVDKQGNIHAGLGKVSFSKEQLWDNISTFVKAINKHKPAAAKGRYIKSAALSMTM
SPSVKLETQELDMK"
gene complement(222987..223412)
/locus_tag="DMACINML_00213"
CDS complement(222987..223412)
/locus_tag="DMACINML_00213"
/inference="ab initio prediction:Prodigal:2.6"
/inference="similar to AA sequence:RefSeq:CAL34622.1"
/codon_start=1
/transl_table=11
/product="50S ribosomal protein L11"
/protein_id="Prokka:DMACINML_00213"
/translation="MAKKVVGEIKLQIAATKANPSPVGPALGQQGVNIMEFCKAFNE
RTKDMAGFNIPVVITVYADKSFTFITKQPPATDLIKKAAGISKGTDNPLKKNKVGKLT
AQVLEIVDKKIADLNTKDRDQAAKIIAGSARSMGVEIVD"
gene complement(223439..223972)
/locus_tag="DMACINML_00214"
CDS complement(223439..223972)
/locus_tag="DMACINML_00214"
/inference="ab initio prediction:Prodigal:2.6"
/inference="similar to AA sequence:RefSeq:CAL34621.1"
/codon_start=1
/transl_table=11
/product="transcription antitermination protein"
/protein_id="Prokka:DMACINML_00214"
/translation="MSTHKWYAIQTYAGSEMAVKRAIENLVKDNIGEEQLKEIVVPT
DVIEFKNGKEKISERSLYSGYVFAHLDLNTLWHRISLQSLPKVGRFIGESKPTPLTEK
DINLILEKVHNRAAPKPKISFEEGENVRITGPFANFTAIVEEYDMVRGLLKLNVSIF
GRSTPVEILYSQVEKII"
gene complement(223985..224164)
/locus_tag="DMACINML_00215"
/translation="MSTHKWYAIQTYAGSEMAVKRAIENLVKDNIGEEQLKEIVVPT
DVIEFKNGKEKISERSLYSGYVFAHLDLNTLWHRISLQSLPKVGRFIGESKPTPLTEK
DINLILEKVHNRAAPKPKISFEEGENVRITGPFANFTAIVEEYDMVRGLLKLNVSIF
GRSTPVEILYSQVEKII"
/locus_tag="DMACINML_00215"
/inference="ab initio prediction:Prodigal:2.6"
/inference="similar to AA sequence:RefSeq:CAL34620.1"
/codon_start=1
/transl_table=11
/product="transcription antitermination protein"
/protein_id="Prokka:DMACINML_00215"
/translation="MSTHKWYAIQTYAGSEMAVKRAIENLVKDNIGEEQLKEIVVPT
DVIEFKNGKEKISERSLYSGYVFAHLDLNTLWHRISLQSLPKVGRFIGESKPTPLTEK
DINLILEKVHNRAAPKPKISFEEGENVRITGPFANFTAIVEEYDMVRGLLKLNVSIF
GRSTPVEILYSQVEKII"

```



CDS /locus\_tag="DMACINML\_00215"  
 complement(223985..224164)  
 /gene="secE"  
 /locus\_tag="DMACINML\_00215"  
 /inference="ab initio prediction:Prodigal:2.6"  
 /inference="similar to AA sequence:RefSeq:CAL34620.1"  
 /codon\_start=1  
 /transl\_table=11  
 /product="preprotein translocase SecE subunit"  
 /protein\_id="Prokka:DMACINML\_00215"  
 /translation="MEKLITYFKLSKAELRKVIFPLKEQVRNAYITVFVVVTVISLFL  
 ALVDWIMSSIVSAIV"

gene complement(224183..224258)  
 /locus\_tag="DMACINML\_00216"

tRNA complement(224183..224258)  
 /locus\_tag="DMACINML\_00216"  
 /product="tRNA-Trp"  
 /inference="COORDINATES: profile:Aragorn:1.2"  
 /note="tRNA-Trp(cca)"

gene complement(224270..224428)  
 /gene="rpmG"  
 /locus\_tag="DMACINML\_00217"

CDS complement(224270..224428)  
 /gene="rpmG"  
 /locus\_tag="DMACINML\_00217"  
 /inference="ab initio prediction:Prodigal:2.6"  
 /inference="similar to AA sequence:RefSeq:CAL34619.1"  
 /codon\_start=1  
 /transl\_table=11  
 /product="50S ribosomal protein L33"  
 /protein\_id="Prokka:DMACINML\_00217"  
 /translation="MRIKVGLKCEECGDINYSTYKNSKNTTEKLELKKYCPRLKKHTL  
 HKEVKLKS"

gene complement(224481..225680)  
 /gene="tuf"  
 /locus\_tag="DMACINML\_00218"

CDS complement(224481..225680)  
 /gene="tuf"  
 /locus\_tag="DMACINML\_00218"  
 /inference="ab initio prediction:Prodigal:2.6"  
 /inference="similar to AA sequence:RefSeq:CAL34618.1"  
 /codon\_start=1  
 /transl\_table=11  
 /product="elongation factor TU"  
 /protein\_id="Prokka:DMACINML\_00218"  
 /translation="MAKEKFSRNKPHVNIPTIGHVDHGKTTLTAAISAVLSRRGLAEL  
 KDYDNIDNAPEEKERGITIATSHIEYETDNRHYAHVDCPGHADVVKNNITGAAQMDGA  
 ILVSAADGMPQPTREHILLSRQVGVPYIVVFMNKADMVDDAELLELVEMEIRELLSS  
 YDFPGDDTPIISGSALKALEEAKAGQDGEWSAKIMDLMAAVDSYIPTPTRDTEKDFLM  
 PIEDVFSISGRGTVVTGRIEKGIVKVGDTIEIVGIKDTQTTTGTGVMFRKEMDQGEA  
 GDNVGVLLRGTKKEEVIRGMVLAKPKSITPHTDFEAEVYILNKDEGGRHTPPFNNYRP  
 QFYVRTTDVTGSIKLADGVEMVMPGENVRITVSLIAPVALEEGRFAIREGGKTVGSG  
 VSKIIK"

gene complement(225741..225815)

tRNA                   /locus\_tag="DMACINML\_00219"  
                      complement(225741..225815)  
                      /locus\_tag="DMACINML\_00219"  
                      /product="tRNA-Thr"  
                      /inference="COORDINATES: profile:Aragorn:1.2"  
                      /note="tRNA-Thr(ggt)"

gene                   complement(225910..225986)  
                      /locus\_tag="DMACINML\_00220"

tRNA                   complement(225910..225986)  
                      /locus\_tag="DMACINML\_00220"  
                      /product="tRNA-Gly"  
                      /inference="COORDINATES: profile:Aragorn:1.2"  
                      /note="tRNA-Gly(tcc)"

gene                   complement(225993..226078)  
                      /locus\_tag="DMACINML\_00221"

tRNA                   complement(225993..226078)  
                      /locus\_tag="DMACINML\_00221"  
                      /product="tRNA-Tyr"  
                      /inference="COORDINATES: profile:Aragorn:1.2"  
                      /note="tRNA-Tyr(gta)"

gene                   complement(226140..226215)  
                      /locus\_tag="DMACINML\_00222"

tRNA                   complement(226140..226215)  
                      /locus\_tag="DMACINML\_00222"  
                      /product="tRNA-Thr"  
                      /inference="COORDINATES: profile:Aragorn:1.2"  
                      /note="tRNA-Thr(tgt)"

gene                   complement(226349..227086)  
                      /locus\_tag="DMACINML\_00223"

CDS                    complement(226349..227086)  
                      /locus\_tag="DMACINML\_00223"  
                      /inference="ab initio prediction:Prodigal:2.6"  
                      /inference="similar to AA sequence:RefSeq:CAL34617.1"  
                      /codon\_start=1  
                      /transl\_table=11  
                      /product="amino-acid ABC transporter ATP-binding protein"  
                      /protein\_id="Prokka:DMACINML\_00223"  
                      /translation="MSILKIKNLQKYYGSHHALKNINLEVKQKEVVVILGPSGCGKST  
LLRCINGLEEIIADGIIIEIGQDKIDKNFKDWTRVRQKVGVMVFQSYELFEHLSVKDNILL  
GPLKVQKRAKEEVLQEAKIWLEKVGLAHKIDAYPRELSSGGQKQRIAIVRSLCMNPELM  
LFDEVTAALDPEIVREVLEVILNLAKDGMTMLIVTHEMGFARAVADRIIFMDNGEIII  
ENTPDDFFKNPKSERAKKFLNLFDYHK"

gene                   complement(227088..227744)  
                      /locus\_tag="DMACINML\_00224"

CDS                    complement(227088..227744)  
                      /locus\_tag="DMACINML\_00224"  
                      /inference="ab initio prediction:Prodigal:2.6"  
                      /inference="similar to AA sequence:RefSeq:CAL34616.1"  
                      /codon\_start=1  
                      /transl\_table=11  
                      /product="amino-acid ABC transporter integral membrane  
protein"  
                      /protein\_id="Prokka:DMACINML\_00224"  
                      /translation="MFDLLNPDTLSRLWKGLYITLIEISIVSIIITSFGGLFLGILMSL

```

KNRYVYILCRFALEFVRVMPLLVWLFMVYFGLSRWLGINLSSVSSAIIVFSIWGSFEM
MDLVRTSLKSIPKHQYESAASLGLNKTQSYFYVVIIPQAMRRLTPMSMNLTRMIKSTT
FAYLIGAVELVKVGQQIIEFNKNDLAPFIIYGLIFFIFFIICYPVTLYSRKLEKKWS
"
gene      complement(227737..228438)
          /locus_tag="DMACINML_00225"
CDS       complement(227737..228438)
          /locus_tag="DMACINML_00225"
          /inference="ab initio prediction:Prodigal:2.6"
          /inference="similar to AA sequence:RefSeq:CAL34615.1"
          /codon_start=1
          /transl_table=11
          /product="amino-acid ABC transporter integral membrane
protein"
          /protein_id="Prokka:DMACINML_00225"
          /translation="MDFDFILANSNAFVAAAWLTKLSFFGGIIFSIIIIGFFCILMSYF
KITIMEAFCKVYIEFSRNTPLLIQLFFLYALPKFNIHQIPPLNLICLSVDEALRP
AFACAIIVGLSFLGGSYMAESFRAGFEAIKKQFEAGLSLGFTKLNNLRYVILPQALGV
CLPGISANIVFLIKETSVVSIIALPDLVTVMKGLNSLTYKTDELLLLLFLGYLCIILP
ISLFLFFLEKRFSNV"
gene      complement(228449..229045)
          /locus_tag="DMACINML_00226"
CDS       complement(228449..229045)
          /locus_tag="DMACINML_00226"
          /inference="ab initio prediction:Prodigal:2.6"
          /inference="similar to AA sequence:RefSeq:EAQ73447.2"
          /codon_start=1
          /transl_table=11
          /product="transcriptional regulator, putative"
          /protein_id="Prokka:DMACINML_00226"
          /translation="MQEYLDFLKGIGKIRKFEKNNILFFEGEKALKFFILLKGRVRY
KSTAGEKEITLHYFTPPNFIAEMPTFKRLRYPANAVCEEYCEILEIDFEDFEALCTQN
KEFNFLISSLFEKIKILEKKLLENSLDLKSCLARYLLENEKNLAQISQRQIAVDLSV
RAESLSRILKEFKNSELIETKKGKIEILDKEGLKKGLW"
gene      229127..229510
          /gene="ctb"
          /locus_tag="DMACINML_00227"
CDS       229127..229510
          /gene="ctb"
          /locus_tag="DMACINML_00227"
          /inference="ab initio prediction:Prodigal:2.6"
          /inference="similar to AA sequence:RefSeq:CAL34613.1"
          /codon_start=1
          /transl_table=11
          /product="group III truncated hemoglobin"
          /protein_id="Prokka:DMACINML_00227"
          /translation="MKYETINKESIAKLMELFYDKIRKDKDLGPIFNNAIGTSDEAWK
EHKAKIGNFWAGMLLGGDYIGQPLKKHLDLPPFPQEFFGIWLGLFEESLDKIYNEEM
KNVILQRAQMIASHFQNMLYRFGGH"
gene      complement(229513..231327)
          /gene="recG"
          /locus_tag="DMACINML_00228"
CDS       complement(229513..231327)
          /gene="recG"

```

```

/locus_tag="DMACINML_00228"
/EC_number="3.6.1.-"
/inference="ab initio prediction:Prodigal:2.6"
/inference="similar to AA sequence:RefSeq:CAL34612.1"
/codon_start=1
/transl_table=11
/product="ATP-dependent DNA helicase"
/protein_id="Prokka:DMACINML_00228"
/translation="MKIKENDFDFFKLLKIKSAIDLALILPKKIENLSPSKMPKENEL
CTQKIIIKSIHSHKGGQLFGLGFCKEWNQDISFVFFHPRAWHFVCKIGKELILHAKLT
RFGHIWQFNNPKILASFAGFAPKYQIQGLQDNKISEFIHQYLNYKNLKESGIEDKYIH
FLLNLHAYDEKSFMLFENLERFEKDLKYIEIYNFLKRLKAKKNHFKAYEIEIFNIANW
LKNLPFSPTRDQLNALKDIEQDLSSKEAKRRVIMGDVCGCKTLVLLGAALMVYPKQAI
LMAPTSILAHQLYEEAKLLPEFMDILFIKGGKKEKDLEEKIKKTNLIIGTHALIHQ
SHNAVLVMIDEQHRFGSAQRQQIYSLNEDELAPHFIQFSATPIPRTLSMIQSELLNFS
FIKEMPFKKDITTLCIQNEGFAKLSEKIKEEIAQNHQIIIIYPLVNPSPDKIPYLSLEQ
ARKYWEDNYEKVFVTHGKDKQKDEILERFRDEGNILLSTTVVEVGISLPRSTIVIVG
AERLGLATLHQLRGRVGRIGLKSTCYLYTKLKEIPNRLKEFASTLDGFKIAELDLKNR
LSGDLLDGFIQHGNEFKYFDFSKDEYILEKAKKDLMKI"
gene complement(231317..232537)
/locus_tag="DMACINML_00229"
CDS complement(231317..232537)
/locus_tag="DMACINML_00229"
/inference="ab initio prediction:Prodigal:2.6"
/inference="similar to AA sequence:RefSeq:CAL34611.1"
/codon_start=1
/transl_table=11
/product="zinc protease-like protein"
/protein_id="Prokka:DMACINML_00229"
/translation="MQNLEVNEIKIPFIFEENNDPPIVILKLVFRNCGRSYDEIAGLA
KMFARILNEGVDDNFFKELEFKAVNLEASSGFESLEINLSCLEENFEFALKHLENLLL
NPRFEKILEKLNALGELASKNSDFDYLAKNLLNSEIFECKEFQSPNDGDEKTIKQ
ISLSDLESFYKKNINLSNLVVILGGNLAQEKAKGLLDKLLAKLQKGSQNSQKTYEINS
KNKDIIQIRKESEQAYIYFAAPFFTKFNDKDFYLAKIALFILGQGGFGSRIMEEIRVK
RGLAYSAYAMLDMNASFTRVFGYLQTKNESAKEAKKIVKEVFKDFVKEGVSQNELVQA
KNFLIGSTPLRYESLSRRLSISFNEYQGLPKGYYKEELKLIKVELQELNAYIRKHN
EILDNLNFASIANEN"
gene complement(232537..233583)
/locus_tag="DMACINML_00230"
CDS complement(232537..233583)
/locus_tag="DMACINML_00230"
/inference="ab initio prediction:Prodigal:2.6"
/inference="similar to AA sequence:RefSeq:CAL34610.1"
/codon_start=1
/transl_table=11
/product="putative radical SAM domain protein"
/protein_id="Prokka:DMACINML_00230"
/translation="MKRLDKEEALYLLRNANLVELGEMAYQRKLELHPEKITTFFVDR
NINYTNVCCIDCSFCAYRHHKEDDAYILSFEEIGKKIEELEAIGGTQILFQGGVHPK
LKIEWYEELVSWIKEHYPNITVHGFSAVEIAYIAKASKISISEVLQRLQAKGLFSIPG
AGAENVLSDRVRDIIAPNKCDTATWLEVHRRRAHEIGMKSTATMMFGTVESDEEIVDHF
HLRKLQDETGGFRAFILWSFQSENTALIQKHPEIMKQSSNKYLRLALARLYLDNFKN
LQSSWVTQGSLLIGQLALKFGANDLGSTMMEENVSAAGASYRMNQDEMIRLIKSLGEN
PAKRNTAYEILERF"

```

gene 233656..234843  
 /locus\_tag="DMACINML\_00231"

CDS 233656..234843  
 /locus\_tag="DMACINML\_00231"  
 /inference="ab initio prediction:Prodigal:2.6"  
 /inference="similar to AA sequence:RefSeq:CAL34609.1"  
 /codon\_start=1  
 /transl\_table=11  
 /product="putative MFS (Major Facilitator Superfamily) transport protein"  
 /protein\_id="Prokka:DMACINML\_00231"  
 /translation="MNYIDLLKNNKNIRILTLVQFIVYFGAWFSQTGVFTLLVSLNAP  
 TWATATSAMLAFLPGVLLAPINGVIVEKKNPKKLLLSMISIELVSIFCLIFVTSLSML  
 WLLFILIFVRLCVASIYFQAEMSLAKILNPEELKLANEMHSVIWAVSYTASMASAGI  
 FINFFGIKAAFLFDCCLIIIGILLTRLHIPHFQKIQNKFFTLIKEGFLYVLQNKII  
 LHLIILHAFIGFTAYETLVTLAQHEYKEVLSAALVIGFLNAIRALALAFGPLFLSRI  
 TNNKNIFFLYLQGLGIILWALTQFNFYISFIGLIAAGFCTSSLWAYTYTMIQKNC DK  
 AYYGRVIAYTDMVYLSFSALISQLMGLLFEQGLKLATITALLGMIFIFAIFYWKWFDK  
 KYL"

gene complement(234870..235958)  
 /gene="nusA"

CDS complement(234870..235958)  
 /gene="nusA"  
 /locus\_tag="DMACINML\_00232"  
 /inference="ab initio prediction:Prodigal:2.6"  
 /inference="similar to AA sequence:RefSeq:CAL34608.1"  
 /codon\_start=1  
 /transl\_table=11  
 /product="transcription termination factor"  
 /protein\_id="Prokka:DMACINML\_00232"  
 /translation="MEKIADIIESIANEKNLDIESVKEKVITALINTAKRIYQGEYDF  
 FVDRKNLNLYQKITVVADNDERLNENKESYIEFSKAKKEAPDVEIGDELTYECSLENL  
 GRTAVNILHKELEYHIQKLLLEQTI FEKYKNKVGQMVFGNVVRIDNEENTYIEIDELRA  
 FLPRKNRIKGEKFKVGDVVKAVIRRVYTDKGIKME LSRTSPKFLECLLEAEVPEIKDG  
 YVSVVKCARIPGERAKIILQANGANIDPVGATVGKGV RINAVSKELHNENIDCIEFS  
 NEPEIL IARALAPAI VSSVKIENKAIVTLNSEQSKAIGKSGINIRLAGMLSGYEIE  
 LNEVNTHTTNTLSNEEALKNLQDLFKI"

gene 236084..236326  
 /locus\_tag="DMACINML\_00233"

CDS 236084..236326  
 /locus\_tag="DMACINML\_00233"  
 /inference="ab initio prediction:Prodigal:2.6"  
 /inference="similar to AA sequence:RefSeq:CAL34607.1"  
 /note="hypothetical protein Cj0459c"  
 /codon\_start=1  
 /transl\_table=11  
 /product="hypothetical protein"  
 /protein\_id="Prokka:DMACINML\_00233"  
 /translation="MDLKLARNLINEEPKNISLAKIEEAVNQEGQKFFYFDKENS HKD  
 LIALVEHFEKKGLSVYHRTIRYGLDSNDFMYEVHIL"

gene 236323..237624  
 /gene="miaB"  
 /locus\_tag="DMACINML\_00234"

CDS 236323..237624  
/gene="miaB"  
/locus\_tag="DMACINML\_00234"  
/inference="ab initio prediction:Prodigal:2.6"  
/inference="similar to AA sequence:RefSeq:CAL34606.1"  
/codon\_start=1  
/transl\_table=11  
/product="putative tRNA 2-methylthioadenosine synthase"  
/protein\_id="Prokka:DMACINML\_00234"  
/translation="MSSKKLFIQTLGCAMNVRDSEHMIAELTQKDNYTLTEDIKEADL  
ILINTCSVREKPVHKLFEVGGFEKVKKSGAKIGVCGCTASHLGSEIFRRAPYVDFVL  
GARNISKITEAVNTPKFMSVDIDYDESEFAFGDFRNSIYKSYINISIGCDKHCTYCI  
PHTRGDEISIPLNIIYKEAQKAVDKGAKEIFLLGQNVNNGKFRFRNEHKKMDFSDLL  
ELSTIEGLERIRFTSPHPLHMDDKFLEVFAPKPKVCKSMHMPQLQSGSSQILKSMKRGY  
TKEWYLDRAKLRCLPNSVISTDIIIVAFPGESDKDFEETMEVLEKVRFEQMFSEFKYS  
KRPLTKAATMPNQIDEAIASSRLSTLQARHNEILDDIVKKQENKTFKVLFEELRAGNA  
IAGRTDNNFLVQVEGSEELLGTFKEVKITNAKRMVLYGEII"

gene 237587..238231  
/locus\_tag="DMACINML\_00235"

CDS 237587..238231  
/locus\_tag="DMACINML\_00235"  
/inference="ab initio prediction:Prodigal:2.6"  
/inference="similar to AA sequence:RefSeq:AAW35094.1"  
/note="conserved hypothetical protein"  
/codon\_start=1  
/transl\_table=11  
/product="hypothetical protein"  
/protein\_id="Prokka:DMACINML\_00235"  
/translation="MQSVWFYMGKSFKIAFIARLVFILQWLIFITCKKTYKGDKVDQD  
SYVILFWHGRLALMPFAFRHFGKKGKKAYVMISHHRDGEQIARIKLFGLDTPVRS  
KGASTALRSFAKILDENHDVVITPDGPRGPYHSISDGAVLLAQKKNVKIRILN  
YEARN FWEFKSWDKMILPKPFTHLVYRLSEPLDISSLDKQAKFFLLEHFKNIEQMDKF"

gene 238240..239229  
/locus\_tag="DMACINML\_00236"

CDS 238240..239229  
/locus\_tag="DMACINML\_00236"  
/inference="ab initio prediction:Prodigal:2.6"  
/inference="similar to AA sequence:RefSeq:CAL34604.1"  
/note="hypothetical protein Cj0456c"  
/codon\_start=1  
/transl\_table=11  
/product="hypothetical protein"  
/protein\_id="Prokka:DMACINML\_00236"  
/translation="MLFLLKKILPQLFTSIILEDKKNILKTSIYKNQKLISSNEKTFD  
KSEKLLEYVKTLSKFLFYHTALFLNVKEQGLIPSKNDKDFERFNVGKMSLKS  
VTLNNA LIYTATEHIEYFNEFFEDYGGDLFLYSPFAILYHNILKEKPSNDKITLYAYRHE  
YIIL TLIICRGVEILYGDIIFFEEELGLEIENQEENLDSLKGDILSDTEVTL  
DNFNETLEDK LNALDQFGDNDLEHNEDDSEFLDGKDKLDLEEMNQFGNDMELCRHIVMSIEK  
FYKDEK YQSVFIDNIFILSTKELDQSAIEFLEEETLLEIQTKQINTLDSITELMQKELQ"

gene 239226..239750  
/locus\_tag="DMACINML\_00237"

CDS 239226..239750  
/locus\_tag="DMACINML\_00237"  
/inference="ab initio prediction:Prodigal:2.6"

```

/inference="similar to AA sequence:RefSeq:AAW35092.1"
/note="conserved hypothetical protein"
/codon_start=1
/transl_table=11
/product="hypothetical protein"
/protein_id="Prokka:DMACINML_00237"
/translation="MTTYSFIKPRKKPIFTLFDKIWLGLFSFGIFFIFAIYFLYLTKI
ALTHNLIIEEQEQVLQFQNKQTQENGQLYNILLEQSEIANTFYTQNQAFKNSLKNLFDI
IVKTDGITLESVEQEKNSLKLIGVPTPKEMFALLLETPLKSIFDQSFTTYRNLNGWY
RFISISKQNSGVLQ"
gene 239747..240265
/locus_tag="DMACINML_00238"
CDS 239747..240265
/locus_tag="DMACINML_00238"
/inference="ab initio prediction:Prodigal:2.6"
/inference="similar to AA sequence:RefSeq:CAL34602.1"
/codon_start=1
/transl_table=11
/product="putative membrane protein"
/protein_id="Prokka:DMACINML_00238"
/translation="MKDKSLEELNLIKIIYVLSFITVCTALILFLLLPVLKDYKQTH
LRKNSQAAIFNAAKAKLDASENKLITLRTENKSLEQFEQQFNLAHLQNFLEKYFESI
QITELDKKEKYLTHRINIRALINPRRLYDFVDALAQYNNLIKIDYPMTLKASDHG
IMINLNVQIYSN"
gene complement(240257..241549)
/locus_tag="DMACINML_00239"
CDS complement(240257..241549)
/locus_tag="DMACINML_00239"
/inference="ab initio prediction:Prodigal:2.6"
/inference="similar to AA sequence:RefSeq:CAL34601.1"
/codon_start=1
/transl_table=11
/product="thiamin biosynthesis protein ThiC"
/protein_id="Prokka:DMACINML_00239"
/translation="MKTQMLYAKEGIFTKEMEIVAQKEEVSKDFLLENIACGKIIIPA
NINHKS LDPNGIGLRLTKVNVNLGVSNDYSEEMKKVELAHKFGIEAIMDLSNYG
KTSRFRDELIAVSKAMIGTVPVYDAVGFLEKDLKQISARDFLDVVYHHA KSGVDFMTI
HAGINSRAARVFKESKRLTNIVSRGGSVLAYWAMKEAENPFFEYDDLLEICLK YDV
TSLG DALRPGSTHDASDAAQISELIELSLLTQRAW EAGVQVMIEGPGHMAINEIEAN
MQIEKRICKGAPFYVLGPLVTDIGAGYDHISGAIGGAVAAAAGADILCYVTPAEHLRL
PNLNDVRDGIVATKIAAHAGDLAKLPKERKRDEMSKARQDIDWEKMFKLAIDG EKAK
KMFNERRPDDLNSCSMCGKMCAMNTMNQVLKGENVSLV"
gene complement(241721..242482)
/locus_tag="DMACINML_00240"
CDS complement(241721..242482)
/locus_tag="DMACINML_00240"
/EC_number="2.7.7.7"
/inference="ab initio prediction:Prodigal:2.6"
/inference="similar to AA sequence:RefSeq:ADC28071.1"
/codon_start=1

```

```

/transl_table=11
/product="DNA polymerase III subunit epsilon"
/protein_id="Prokka:DMACINML_00240"
/translation="MSLQQIDQIISVLSKQSKPYEWVIKEFKKIEELKDYELDLETFE
LLGLGLTLDKNNIFTLQTRTKKIKEEIFCIVDIESTGGIKNGQILEIGAVKIKNLQEI
DRFSSLVQVKEIPENITELTGINLDMVKDAPSLTKVLNDFRLFVKDSIFVAHNVRFDY
GFISKALNECGFGILLNRRICTIEFAQCCIESPRYKLDVVKELGIIKNAHHRALNDAL
AAAEIFKHCLGKLPYHIKTTEELINFTKTSRIKQK"
gene complement(242479..243126)
/gene="rpe"
/locus_tag="DMACINML_00241"
CDS complement(242479..243126)
/gene="rpe"
/locus_tag="DMACINML_00241"
/inference="ab initio prediction:Prodigal:2.6"
/inference="similar to AA sequence:RefSeq:ADN90653.1"
/codon_start=1
/transl_table=11
/product="Ribulose-phosphate 3-epimerase"
/protein_id="Prokka:DMACINML_00241"
/translation="MYVAPSLLSANFLKLEEEIKAIDEAGADLLHIDVMDGHFVFNLT
FGPCVIEKISTITSIPLDVHLMVKDVGKFDLFTPIKPKFISFHIESEPHIRLCEYI
RSQGIHPAIVLNPHTPINSIKHMIDFVDMVLLMSVNPFGGGQKFLPLVYDKIKELRRL
IDERNAKVFIEVDGGINGLNASDLEAAGADILVAGSYIFSSNDYKTSISSLKLEF"
gene 243264..243458
/gene="rpmB"
/locus_tag="DMACINML_00242"
CDS 243264..243458
/gene="rpmB"
/locus_tag="DMACINML_00242"
/inference="ab initio prediction:Prodigal:2.6"
/inference="similar to AA sequence:RefSeq:ADN90652.1"
/codon_start=1
/transl_table=11
/product="50S ribosomal protein L28"
/protein_id="Prokka:DMACINML_00242"
/translation="MARICQITGKGPMVGNVSHANNKTKRRFLPNLRTVRVTLEDGT
TRKMRIAASLRTLKQNSK"
gene 243657..243872
/locus_tag="DMACINML_00243"
CDS 243657..243872
/locus_tag="DMACINML_00243"
/inference="ab initio prediction:Prodigal:2.6"
/inference="similar to AA sequence:RefSeq:CAL34597.1"
/note="conserved hypothetical protein Cj0449c"
/codon_start=1
/transl_table=11
/product="hypothetical protein"
/protein_id="Prokka:DMACINML_00243"
/translation="MLHEYRELMSELKGDHFDKLFERHNELDDQIKDAEEGRALLS
DIEISNLKKEKLIKDELNQYLSNYKK"
gene 243882..244976
/locus_tag="DMACINML_00244"
CDS 243882..244976

```



```

/locus_tag="DMACINML_00244"
/inference="ab initio prediction:Prodigal:2.6"
/inference="similar to AA sequence:RefSeq:CAL34596.1"
/codon_start=1
/transl_table=11
/product="putative MCP-type signal transduction protein"
/protein_id="Prokka:DMACINML_00244"
/translation="MFGSKINHTEHQNIKNENQNLAHQLEKIKAEENLELKDKISTLEQ
EALSKLKTDLNVLGGVLKNITIVQSDMLENVNKAIEIISNYSKTSLAEMDELNHIA
NSINASLSDITESANKTRDVAGTLHRSVDEITNVINLIKDVSDQTNLLALNAAIEAAR
AGEHGRGFAVVADEVKLAETQKATTEVEMNINLLKQANEMYTQSEQVEKISINSN
AHIMSFSEKFTHLVNEAHSTNSNAVGIASEAFVSLAKLDHIAFKLNGYKEIFAKSGQE
LADHTSCRLGKWASTGKERFGNSKSFTEKINEPHQKVHENMNSAIRIASTEDASLGNT
QDVIIKKCENAENASLHFLDFVKEMLNETN"
gene complement(244991..245584)
CDS /locus_tag="DMACINML_00245"
complement(244991..245584)
/locus_tag="DMACINML_00245"
/inference="ab initio prediction:Prodigal:2.6"
/inference="similar to AA sequence:RefSeq:CAL34595.1"
/codon_start=1
/transl_table=11
/product="putative NUDIX hydrolase family protein"
/protein_id="Prokka:DMACINML_00245"
/translation="MIFKNLKELPFCESKYIKPKRFSYESNGKLCTWDFIESKDSVSI
LLYHKELKSFIFVRQFRIPLWYHQKQDKNYQKDNMGYTIELCSGLVDKDLPLEQIAK
EECIEEVGYAPKEFEKVGDFYTGFGSGASRQSFYFAIVDENDKVCEGGGVEDEQIEAV
FVKINEYEEFSKKIHTPLLDFAYLWFLKEKELCLK"
gene complement(245663..247729)
CDS /locus_tag="DMACINML_00246"
complement(245663..247729)
/locus_tag="DMACINML_00246"
/inference="ab initio prediction:Prodigal:2.6"
/inference="similar to AA sequence:RefSeq:EAQ73281.2"
/codon_start=1
/transl_table=11
/product="TonB-dependent receptor, putative, degenerate"
/protein_id="Prokka:DMACINML_00246"
/translation="MNAKLLKLSILCFCLIGLGEIKAEQYQLDDVVVSASGFEQDLV
DAPASISVITKEELSKKPIKDIGEAIISDIPGVDVTMNKTGTDFYSIRGFGSSYTLVLI
DGKRQSVANGFYDNGFSGSESGYLPPASMIERIEVIRGPASTLYGSDAVGGVINIITK
KNPNKTEASIEFNLLQQHSNKYGNAGGFNAYVATPLIEDTLSISARIKYYDKAASDL
KWPTPVWNGGTQRPENYQIASHSPGYFTSLGFGSRLNWTVNDENNVLVLDVERYVNEIS
VNSTSGRAIKSERQLFKDNVVLNHDGNYEFGTSNAYLQYGSTKDKELHSQIWWGEGKV
VLPWNLDKYGNLVSTFGTRIDYETLKNQESAGSEVRGKNLDQTTVALYGEGEYFISD
DLIFTTGLRYIYSDLFDESELTPRVYLVYHLNDNVAFKGGVAMGYKTPAAKQLTNGYYN
YSNDSASFGNPDLPKEESTNYELGVDFRIFDFAHYSITGFITDFKNQISSEELTGMQN
DIDCTNGVTCERSINLGKTQTKGVEFAFNTPYNGFSVNSSYTFMDNRYKDGQTNWFG
GDRIENLPRHIAMKLNIEQKGFSSYVKARARLDTIARSKGGGSGILPWQYKYPFYIV
DLGVNYKIDKQSSLSFTVQNLFDKDFDQPQVTRWDTSANPGGYANRYQDYTEGRSFWL
SYKYDF"
gene complement(247975..248808)
/gene="citE"
/locus_tag="DMACINML_00247"

```

CDS complement(247975..248808)  
 /gene="citE"  
 /locus\_tag="DMACINML\_00247"  
 /EC\_number="4.1.-.-"  
 /inference="ab initio prediction:Prodigal:2.6"  
 /inference="similar to AA sequence:UniProtKB:P9WPE1"  
 /codon\_start=1  
 /transl\_table=11  
 /product="Citrate lyase subunit beta-like protein"  
 /protein\_id="Prokka:DMACINML\_00247"  
 /translation="MKAKSFLFVPSIYPERFIKALQSGANQIIIDLEDSVEEAKKEVG  
 RKNIA DFSSQCAKNNDFLIRINETQSAEFQKDL SLISTIKESNSIVGIVLPKAQNYE  
 DIDILSKFELPIIPIESALGVENLDDIAKHPSVLALSFGSLDMTLDLNLQEGEGKNF  
 ILNSIRTQIVLKS VKYNLLSPINGVYPDIKNIDGLKEDLLFAKSMGFGGSLC IHPNQV  
 VPINEVFSPAQQIAWAKEILSLRKNSNDIIFNHNGMMVDLPVIKKA EQILLDSNSNL  
 P"

gene complement(248819..249991)  
 /gene="yfdE"

CDS complement(248819..249991)  
 /gene="yfdE"  
 /locus\_tag="DMACINML\_00248"  
 /EC\_number="2.8.3.19"  
 /inference="ab initio prediction:Prodigal:2.6"  
 /inference="similar to AA sequence:UniProtKB:P76518"  
 /codon\_start=1  
 /transl\_table=11  
 /product="Acetyl-CoA:oxalate CoA-transferase"  
 /protein\_id="Prokka:DMACINML\_00248"  
 /translation="MLPLEGKLVLSIEQAI AAPFCTRQLADLGARVIKIERPEVGD LA  
 RGYDKRVDGIASHFVWVNRSKESLAIDLKDPDALEFIKTILPKVDIFVQNLAFGASKR  
 LGLDYENLKKYNPKIIVCDISGYGEGGNYGHKKAYD LLIQSEGLV SITGTQDECVKV  
 PISIADISAGMYAYSGILQALLYLEKTGKGSRVEISMLECM AEWNNYPLYTYKNATP  
 PERKGAFHASITPYGPYKAKDGVVMFGLQNPREWESFCKIVLQDES LIDHEDFKNNTL  
 RTKNASKVKEI IEDAFKNLSAKEVINRLDEAKIANGNVNELNQVWEHPQLKARNRWRE  
 VDSEVGKIPALLPPATNNN YEARMKDIPALGEHTESILREFGFSDKINLFKEKKII"

gene complement(250004..250834)  
 /gene="meh"

CDS complement(250004..250834)  
 /gene="meh"  
 /locus\_tag="DMACINML\_00249"  
 /EC\_number="4.2.1.153"  
 /inference="ab initio prediction:Prodigal:2.6"  
 /inference="similar to AA sequence:UniProtKB:A9WC41"  
 /codon\_start=1  
 /transl\_table=11  
 /product="Mesaconyl-C(4)-CoA hydratase"  
 /protein\_id="Prokka:DMACINML\_00249"  
 /translation="MSYENFIGKQEKFTENINEKQVQKIVATLQSKQLKNGDALPYLW  
 QWCFNEALTPDKLGRDGHPLGLDKNSFLPSFGEVNRMWAGGRFKFITPLIIGEDAT  
 KITTIIKKIQEKQKSGK LTFVTL EHCYYQKEQLKIEEQDIVYKQPAPPKLTSDVVM  
 NADYSEKMQPDSTLLFRYSALTFNGHKIHYDFPYATQVEGYHGLVIHGPLLATYMINC  
 FVKNHPDKQIVNYSYRGMHALCVPDSFAVESKITDKNTAEVWINKNGFVAHSGTIHFK"

```

"
gene      complement(250845..252143)
          /locus_tag="DMACINML_00250"
CDS      complement(250845..252143)
          /locus_tag="DMACINML_00250"
          /inference="ab initio prediction:Prodigal:2.6"
          /inference="similar to AA sequence:RefSeq:CAL34701.1"
          /codon_start=1
          /transl_table=11
          /product="putative dicarboxylate carrier protein MatC"
          /protein_id="Prokka:DMACINML_00250"
          /translation="MMDTINIIILFSLIISIALGYVLKANIGVFMLSAFIGAYLYGI
TPEKVINLWNGSLSLFFILLSITYFYGFIAINGTLNMLKAVYSVRNRPWSIPIALY
ITVMVFGIGPGHYAGFAFMSPLVLYIASKIKMNKILAAIIISGSCAGGFNPFTLGG
RVTFDLIEKLGYSAEASAIMQLNLGKNMFIAHTLIFIIGYFLLKGYKVKITSQITKPK
RLNAAQWKTIFIVCFVFAVIMIPSFFLALNPHDETLKKVTSIFNPVVFVSLGLIVLAVI
FGIGSEKEAFKNVPWDLIFMIGLSMLIELSKTTGIMENITTFMSAHGSSSSNWLYYL
LGILSSCMSAFASSMGVVMPTFFSIVPSIKALEPSLAFSIIAVFATFTGYSSSFSTGGA
LVLAGAQDESEKRYLFIIRLIILPLILVVFVLLFLGILN"
gene      complement(252602..253540)
          /gene="accA"
          /locus_tag="DMACINML_00251"
CDS      complement(252602..253540)
          /gene="accA"
          /locus_tag="DMACINML_00251"
          /EC_number="6.4.1.2"
          /inference="ab initio prediction:Prodigal:2.6"
          /inference="similar to AA sequence:RefSeq:CAL34593.1"
          /codon_start=1
          /transl_table=11
          /product="acetyl-coenzyme A carboxylase carboxyl
transferase subunit alpha"
          /protein_id="Prokka:DMACINML_00251"
          /translation="MASYLDFEKNIQQIDEDIINAQIKGDTEAVAILKKNLEKEIAKT
YKNLSDFGRLQLARHPDRPYALDYIDLILNDAYEIHGDRAFRDDPAIVCFMGYLGEKK
LIVIGEQKGRGTKEKIARNFGMPHEGYRKALRVARLAEKFQIPIFLIDTPGAYPGL
GAEERGQSEAIATNLYELSDLKPTPIAVVIGEGGSGGALAIGVADKLAMMKNSVFSVI
SPEGCAAILWNDPSKSEAATKAMKVTADDLKSQGLIDDVIEEPINGAHRNKEAAAVAI
ADYVKKALDELEKIDPRELASNRMQKILQLGAFSES"
gene      complement(253542..254756)
          /gene="fabF"
          /locus_tag="DMACINML_00252"
CDS      complement(253542..254756)
          /gene="fabF"
          /locus_tag="DMACINML_00252"
          /EC_number="2.3.1.41"
          /inference="ab initio prediction:Prodigal:2.6"
          /inference="similar to AA sequence:RefSeq:CAL34592.1"
          /codon_start=1
          /transl_table=11
          /product="3-oxoacyl-[acyl-carrier-protein] synthase"
          /protein_id="Prokka:DMACINML_00252"
          /translation="MKRVVVTGIGMINALGLDKESSFKAICEGKSGVKKITLFDTTDF
PVQIAAEIENFDPLEVVDGKEVKKIDRFIQLGIKAAREAMQDANFDQNLKKEEFGVVS

```

AAGIGGLPNIEKNSVICSERGPRKISPFFIPSALVNMLGGLISIEHGLKGNISCVTA  
CAAGTHAIGEAYKSIALGNASKMLVIGAEAAICPVGIGGFASMKALSTRNDDPAHASR  
PFDKERDGFVMGEGAGALVFEYEEAKKRGAKIYAELVGFGEADAHHITSPTLDGPL  
RAMKKALKMAGNPKVDYINAHGTSTPVNDKNETAAIKELFGSEIPAVSSTKGQTGHCL  
GAAGAIEAVISIMALDNGIMPPTINQFVSDEECDLDYIPNEARKADLRVMSNSFGFG  
GTNGCVVFKKVD"

gene complement(254790..255023)  
/gene="acpP"

CDS /locus\_tag="DMACINML\_00253"  
complement(254790..255023)  
/gene="acpP"  
/locus\_tag="DMACINML\_00253"  
/inference="ab initio prediction:Prodigal:2.6"  
/inference="similar to AA sequence:RefSeq:CAL34591.1"  
/codon\_start=1  
/transl\_table=11  
/product="acyl carrier protein"  
/protein\_id="Prokka:DMACINML\_00253"  
/translation="MATFDDVKAVVVEQLSIDADAVKMESKIIEDLGADSLDVVELIM  
ALEEKFEVEIPDSDAEKLIKIEDVVNYIENLKK"

gene 255138..255803  
/locus\_tag="DMACINML\_00254"

CDS 255138..255803  
/locus\_tag="DMACINML\_00254"  
/inference="ab initio prediction:Prodigal:2.6"  
/inference="similar to AA sequence:RefSeq:CAL34590.1"  
/codon\_start=1  
/transl\_table=11  
/product="putative transcriptional regulator"  
/protein\_id="Prokka:DMACINML\_00254"  
/translation="MLFSRLIETNSHIWDEYLNHHEFVKKLENGSLKEENFLFYLKQDY  
IYLIHYAKCYARLALNAKNAEELRFAMKFQNYIIEGEIELHKSILKLGINADKLNVKD  
ESLTNIAYTRYMLSVGESGDFLDMLVALSACAIGYGYIGAEIYKRLGKEKLNHPYKE  
WILTYSSDEFQSEIKFEDFLNSYTKISQEKFENLSEIFYNVVRLNENAFWEHALQMK  
MDI"

gene complement(255823..256230)  
/locus\_tag="DMACINML\_00255"

CDS complement(255823..256230)  
/locus\_tag="DMACINML\_00255"  
/EC\_number="1.4.3.5"  
/inference="ab initio prediction:Prodigal:2.6"  
/inference="similar to AA sequence:RefSeq:CAL34586.1"  
/codon\_start=1  
/transl\_table=11  
/product="putative pyridoxamine 5'-phosphate oxidase"  
/protein\_id="Prokka:DMACINML\_00255"  
/translation="MDLKEIAQFLDENTPAFLTTLGTGCGNPRVRPMQSPLLVGDRIFY  
CTSNNKGLFKHIQNYNGIEFCSCSREGVFLRLRANAVFESNAKVKELMFEKYPYLVSL  
YETPQNSRFVFDNLSAKMQFPNGDFKLYKA"

gene complement(256240..256983)  
/gene="fabG"

CDS /locus\_tag="DMACINML\_00256"  
complement(256240..256983)  
/gene="fabG"

```

/locus_tag="DMACINML_00256"
/EC_number="1.1.1.100"
/inference="ab initio prediction:Prodigal:2.6"
/inference="similar to AA sequence:RefSeq:CAL34585.1"
/codon_start=1
/transl_table=11
/product="3-oxoacyl-[acyl-carrier protein] reductase"
/protein_id="Prokka:DMACINML_00256"
/translation="MKFSGKNVLITGASKGIGASIAKTLASFLKVVINYSKPELAD
ALKDEILAQGGNAAVIKFDASKEDEFENGIKTIVESDGELSylvnNAGVTNDKLALRM
KLEDFTGVVDTNLSSAFLGCREALKTMSKKRFGAVVNIASIVGEMGNAGQTNYSASKG
GMIAMTKSFAKEGASRNLRFCVTPGFIKSDMTEILSDEIKQAYQDNIPLKRFAEPEE
VANCVAFLLSDYASYVTGDVLKINGGLYM"
gene complement(257049..258527)
/locus_tag="DMACINML_00257"
/EC_number="5.4.2.1"
/inference="ab initio prediction:Prodigal:2.6"
/inference="similar to AA sequence:RefSeq:CAL34584.1"
/codon_start=1
/transl_table=11
/product="2,3-bisphosphoglycerate-independent
phosphoglycerate mutase"
/protein_id="Prokka:DMACINML_00257"
/translation="MRQKCILVITDGIGFNKEKDFNAFEAAKKNYERLFKEVPNSLI
KTSGLAVGLPENQMGNSEVGHMCIGSGQIIYQNLVRINKAIESYELEKNANLKKLLQK
CKRVHVIGLYSDGGVHSMDFHALLAICAKNGNEVFAHAITDGRDVSPTSGLEFIKK
LKNHCEKIGVHFATLCGRFYAMDRDKRWERVKEYYDCLLGKSKGVPNLVDYVEECYQN
EITDEFIQAANKENYKGMQEDDGLIFINFRNDRMKQLIEVLNSQNFKEFEREKVFENL
LTMSVYDDKFNIPVLFEEIKNTLSETISKAGLTQLHTAETEKYAHVTFVFNGGKEE
LLENETRVLIPSPVKTYDEKPEMSAFEVCDAVRKGIEKGEDFIVVNFANGDMVGHTG
DFNAAVKAVEAVDAACLGEVVECARKHDYAFIITSDHGNCAMQDKKGNLLTNHTTFDV
FAFVEAKGVDKLKENMGLSNIAASVLKILNLEIPKEMNEALF"
gene 258607..259668
/locus_tag="DMACINML_00258"
/EC_number="2.7.8.13"
/inference="ab initio prediction:Prodigal:2.6"
/inference="similar to AA sequence:RefSeq:CAL34583.1"
/codon_start=1
/transl_table=11
/product="phospho-N-acetylmuramoyl-pentapeptide-
transferase"
/protein_id="Prokka:DMACINML_00258"
/translation="MYLSYFSDYAFFTYISVRAGFAFFIALCLSLFIMPKFITWAKN
KNANQPIYELAPQTHKVKSQPTMGLLIFIAVFTSLICVKLDNVFTITALFCLVLF
CLIGLVDDLKILKKNHSGLSPKAKLLAQISVALICILPLYFSPEFNTEFYLPFYKY
PLFDMKIFALAFWILVLISSNAVNLTGDLGLATVPSIFSLSTLGIFFLYLSGNLNS

```

```

EYLLLPKIQGLGEVVIICAALIGALMGFLWYNCYPAQVFMGDSGSLALGGFIGFLAII
SKNEILLLVGFVLETISVILQVGSFKIFNKRVFKMAPIHHHFEEKIGWVENKIIVR
FWMIALLSNLLALASIKLR"
gene      259668..260876
          /gene="murD"
          /locus_tag="DMACINML_00259"
CDS       259668..260876
          /gene="murD"
          /locus_tag="DMACINML_00259"
          /EC_number="6.3.2.9"
          /inference="ab initio prediction:Prodigal:2.6"
          /inference="similar to AA sequence:RefSeq:CAL34582.1"
          /codon_start=1
          /transl_table=11
          /product="UDP-N-acetylmuramoylalanine--D-glutamate ligase"
          /protein_id="Prokka:DMACINML_00259"
          /translation="MKISLFGYGKTTQAIKAKNLVNKFGPFDIYDDHFQEENKDEWGNH
LLNPKEFDEKLSKLEIPSPGFPPNHILIKKAKNLQSEYDFFYDAMPKSIWISGTNGKT
TTTQMATHLLSHVGAIMGANVGFPLAELDLNAKIWILETSSFTLHYHTAKPEIYALL
PISADHLSWHGSFENYVKDKLSVLERMNECDIAILPEIYAKTPTKAYIISYKDEFDLA
QKMDIDIKKISFKSPFLDAVMALSIEKILLDTLSYELLNHFVMEKNKLEELQDNQGR
LWINDTKATNENAVMAALNRYKDKKIHLIIGDDKGVDSLMLFNFMKDFDVELYAIGV
STQKMLDYALKANLKAHKCEFLNAVKEISKTLKNEVALLSPACASLDQFSSYAQRG
EKFKEYVSKI"

```

ORIGIN

```

1 aaacaagggt ttacaaaatc ttcatttagc tttataaact ttagtttata atttaaagat
61 tttaaagtcc ttttttgaaa aaggaaatga aagtataact aattaagctt aaaggaggat
121 taaataaatt attttttttaa ttaatttttg caaaaaatta aaaactagat ttttttgcca
181 atcagctagc taactttgat ataatcatag agaaaat ttt actataaagg aaaacaatga
241 aaaagttttt aaccgctttc ttagttgcct tcacgggctt attttttagta gcttgccaaa
301 acaccaa aac agaaaataat gcaagcaatg aagctaatac cacactcact ttaaagggtt
361 ggactgctcc aaattacaaa ctttttaatt ataagcaaga ttctaaactt acgggttttg
421 atactgattt ggttgaagaa attgctcaaa aaaatggtat tgaaattggt tgggttgaaa
481 ctaattttga tggattgatc cctgctttaa aggcgggcaa gatcगतatg atcgcttcag
541 ctatgagtgc tacagatgaa agaagacaaa gtgtagattt tacaaaacct tattatatga
601 gtaaaaatct ttatattaaa cttaaaaata atgaagctct tcaaaca aaa actgatctag
661 aaggtaaaaa aataggagtt cagttaggaa ctttgcaaga aaatacagca aagactatca
721 aagatgcaca aattcaaagt aataaggatt tgaatatagc tgtttttagca ctaaaaaata
781 ataaaatcga cgctattggt gccgatgagg atactgctaa aggctttttg gctgaaaatt
841 ctgatttagt aagcttttat caagaaacag atgggtggcga aggttttagt tttgcttttg
901 ataaagataa acaaaaagaa gttatagaaa tatttaataga aggtatagat gaagcaaagg
961 ctagtggatt ttatgataac cttataaaaa aatacgaatt agaataagcg tgaaatttca
1021 cgcttctatg atagaat ttt aaatatcata ttttctctct tttgcaactt ttaaaagttt
1081 ttattggtat tgcatacaaa aatcttgcta gtacactcca ataaagacaa aacaattata
1141 aaattaccaa aaaagaaatt tgctactttt tataatcttt acttagataa tctttaagtc
1201 aaaat ttagc actaccacgc taatatctaa ataccatact aaatcaaaca attttcatct
1261 ttagaataat aaagtcacga gttacaaatc taaaaaaaaat tagaaattga attaagttct
1321 agaaacattt tagatacaag ttgattttta actaatcaaaa gctataattt caaagtcaaaa
1381 ataaggaacg actatgcttt acatttacat aaaaacacaa aatgccttag tgcaaagaat
1441 taattttaat cttgataatc aagaattacc gcaaaatatt ttatggattg atttgcttca
1501 tccaagcgcg gcagaaattg cttttatattc aaatgaattt aatcttgaat ttccaacaaa
1561 ggaagagaga gaagaaatag aacttagcgc aaagtactgg gaggataatg ctactataac
1621 tatcaatgct cattttttga ttcgagaatt taagaatgat aacgaagagc aaaactcaat
1681 taagcttcgc actgaaattg taacttttgc aacagctaaa aatattttat ttacaataag

```

1741 atataatgaa tttagcacct ttgaagaaat tcaagcaagg atattagcaa gtccaaagaa  
1801 ttttgaagat ggttttgata ttatcgataa aatgtttgaa gtacgagttg aaaaagatgc  
1861 ggatttgctc gagtggatag ataaagaagc aagacgctta agaacaactg ttttagagaa  
1921 aaaagatgag tatagttatg atgagatgtt aaaagatata tcaagtttac aagaacttaa  
1981 tatgcgagtt agagattcct tttttgataa acgtcgtgct atgacttcct tactgaaaag  
2041 tgataaaatc gatagggata taaaacaaaa tttaactata gttttaaaag acttgaattc  
2101 tttagttgaa ttttagtgttt cacaacttaa tgttctagat aatattcaaa ccattctagc  
2161 aagtcaagtt aacatagagc aaaataaaat catcaaactt tttaccgttg caactgttgc  
2221 catgatgcc cctactctca taggaacaat ttatgggatg aactttaaat ttatgcctga  
2281 acttgagcct cactatgctt atcctatagt gcttgcggtg atgataattt ctatcattgt  
2341 gcctgttatt gtttttaaga aaaagggttg gctataatac attaaaggag ataaaaatgga  
2401 tatcattaaa ataggaattt taaccttaag cgatagggca agtagtggag tatatgaaga  
2461 taaagccact gctgaagttg aaagaactct aaattcatat attaaaaatg aaatcatcta  
2521 ttttaaagaa cttataccag atgattatga tttgattatt aaaaaattac tttatctagc  
2581 agatgagaaa gaatgcgact taataatcac tagcggcgga acaggaccgg cacttcgtga  
2641 tgtaacacca gaagctacag aagcagtatg cgataaatta atgccagggt ttggagaact  
2701 catgctgctt gaaagcttaa aattcgtacc cacagctata ctttcaagac aaacagcagg  
2761 aattcgcaat aaatctttta tcatcaatct acctggcaat cctaaagcca tagcagaatg  
2821 cctagagcct gtatttcctg caatacctta ttgcatcgat ttaatagggg gagcttatat  
2881 agaaggaaat gatgaagtga ttcaagtctt tagacctaag aaaaaatgcc aaaattaaaa  
2941 cttattagct ttaataagcc tgcttaactg cctagcaagc aggcttactg atgcttcctc  
3001 cttgcttatt ttttgtattt tttttttaa tttataaagc ctatcgtcta aaattatctc  
3061 attgggttga attttaggtc ttgtattttg tttatgcgga acttttttct tgaaaaacat  
3121 ttttatcctt ttttgtaaat atacattatt ttaattgaaa aaaatattat ttttaattat  
3181 tatatcatta ttaactttat ttcatgattt taagttagaa ttcgcaaaaa aataaatcaa  
3241 ggaaaataaa tgactttaat tgcaatttta tgcctttata cagcactttt atcttggatt  
3301 tcttataatc aaattcgctt tttagaaaaa gaaaaagaca aacaagctca aattttaagc  
3361 gaggaagatt atcaaaacgc agccgatatt gctatagaaa atgaaaaatt caagcttttt  
3421 tcaaattttt atactctgat tgtaaatatc gcttggatag gctttggatt tctctactta  
3481 aaagaactat taatcagcga aaactctcgt cttgaaaata ctctattttt acttgctttt  
3541 ttaattatca caagtatttt aaatttacct ttaagtattt atgagagttt tgttaaagac  
3601 aaagctcatg gtttttcaa tatgacttta aaacttttta ttaaagacac tataaaaagt  
3661 cttatcttaa ctttgatttt tggattttta atcctttatg ccctactttt ttgttatgac  
3721 ttttttggca ctttttgggtg gtttgcagct tttgtttttg ctttttgtgt gatagtgatt  
3781 ataaatgta tttatcctac tctaactcgt cctatattta acaaaatgga aaaattagaa  
3841 gatgagaatt tgctaagtaa aatcaacgat ctcatgaagc gatgtggatt taatgcaaat  
3901 ggggtttatg tgattgatgc tagcaaaaga gataagcgtt taaatgctta ttttgggtgga  
3961 ctttttaaaa gcaagagagt agtacttttt gacacacttt taaaagcctt aagcgagaga  
4021 gaactcttgg cagtttttagg acatgagcct ggacattttg tccacaaaga tattataaaa  
4081 gactgatta atggagcaat cactatgttt ttacttttct ttatttttgc tcatttgcct  
4141 gattttgcat atctagaaag tcatctagaa ggagttaatg ggggtgtttt tgctctttta  
4201 tttatatttg caaatatttt tagctttatt atctctcctt taataaatgc tttgagtaga  
4261 aaaaatgaat ttgccgcgga tcagcacgga agtaagctta ctagcaagga agatatgaaa  
4321 aatgcactca tagcttttagc aagagaaaat aaagctttta ttaaacaag taagatttat  
4381 accttttttt accttagtca tccaagcatt agcgatagaa tcaaggctct ttcttgacta  
4441 taaaaaacgc tcttatagaa gccaaatcta gacttgaaaa gcatgaaaac gaagccttgt  
4501 ttatactttg tgaatatcta aaaaaagata ggacttggat ttttttaaat caagatctag  
4561 aatttgactc taagccctat tttgaactta tcaagcgctt tcaatcaggg gagccttttg  
4621 aatacatctt tgaaaaagca gatttttggg gcttgggaatt taaagtaaaa aaaggggttt  
4681 taatcccacg ttatgatagt gaaattttac tttcacaagt tcttaaaatt tgcaaaaata  
4741 ataattttca aaatatatta gaaataggct ttggaagcgg aattttaagt atagtttttag  
4801 ctaaagaatt gggaataaaa attacagcct gtgatatcaa ccccaaagct ttacaactgg  
4861 ccttagaaaa tgctaaatta cacaaagttg aacatttaat cgacttttaa ctttatgatt  
4921 ttaaacaat aaaagaaagt tatgatttta ttttttcaa tcctccctat atccaaaatt

4981 catacccat agatcttgg gtacaaaacg aaccaaaga agctctattt ggaggagaaa  
5041 aaggatatga aatthtagaa gaaattataa cttctcctt tgaaagaaag gttaaattht  
5101 tagcatgca atthggctat gatcaaaaag caatthtaaa acaaatthta tatcaaaaaa  
5161 atthtcaagc tgaatthttt caagatgaac aaggatatga tctgtctttt gtcgctcaat  
5221 ttgctaaaaa ataagctttg tatgatatga taagttaaaa aattaaggag aaaaattgaa  
5281 agcaatcaat ctatthttac ttgcagcaat gattggcata gaacttatac ttggcatagt  
5341 tgttgctccg gtgattthtt acccagctaa ctttataggc gagggagttt taagtcattt  
5401 tcaaagcggg ttaatgatga ctcaaatttt cattaataatg ggatattttg taatthttgt  
5461 ttctatthtt aacttattgt ttgaaatcta ttctthtata aaggaagata tgaaatthca  
5521 gattaaattc tcaaaactaa tacttagcat actgatttht atcttaagct tagtattttg  
5581 tttatatttt acaaatacca ttgttgagct tcaaaattht ggagagcaag ctcaaaaaag  
5641 tcaagaattt cttagcatac ataatgcaag tgaagtgggt ataaaaatta ttttattgat  
5701 gcaagthttt ctatatttct taagthttta aatagcaaaa aatgctaga atattthtata  
5761 aaaatthtaa aggaggagca agctatgatg atctctgatg caagcatgat gcagcaaaat  
5821 tattatctaa acaatgctca aaaagctagt gaaaaagctt tagaaaacat tgcagctgtc  
5881 cgtgcaataa gtggagttga tagtgctaat tttagctattg ctgattcttt aagatctcaa  
5941 tcaagcacta tagatcaagg cattgcaaac gcctatgatg ccacggtgt tttacaaatt  
6001 gcagatgcaa gccttacaaa ttttctcaa agtgctgata gacttaatga actctccgta  
6061 aagatgaata atgcggcatt aagtgattct caaaaaagta tgttaagaac agaagcaaca  
6121 cgcatacaag aatccatcaa tgattctttt aataatgcta cttataatgg aaaaaatgta  
6181 tttcaaacta tgaatthttg agtaggaagt ggaactgaaa caactaattt aaatccattg  
6241 gcaactagtg gtcttagcat agataatcaa gacagcatta caagthttat ggatcaactt  
6301 ggtgctthta gaagtgaat aggttcaggt ataatgcta tcacatctaa tatcaatgct  
6361 agcgtacaaa atagcatcaa tgcgaaagca gctgaaaata atthgctcaa taatgatatg  
6421 gcaaaaaatg tcaatgattt taatagcaat tacctaaaag aaaatgcggc tgcctttgtt  
6481 gctgcacaat ctaatatgca gcttcaaagc aaaattgcta gcttattgca atgataaaag  
6541 ccctaatcta gggcttctct ttttataaaa atgactttag acaaattht agaaaaaac  
6601 aaaaatattc gtctttagc agcaagcaaa tatgttgatg caaatattat cgaaaaactt  
6661 tttgctcaag gaatcacaga atthggagaa aatcaagttc aagctthaat acaaaaaaaa  
6721 gaaattcttg ataaaaaga tthaaatata aatggcatt ttataggaac gctacaaagc  
6781 aataaaatca atctthttat caagcaaaaa ccaatactct ggcattcttg taatggatta  
6841 aaaatagcaa aagccatgga taaaagacta aattataaac tagatactt actagaaatc  
6901 aatagtcca atgaactcag caaaagcggg cttaatccgg atcaagctat agaagaatat  
6961 ttacaaattc aagaagaatg tcctaattht aatctttgag gagttatgag cataggctca  
7021 cacagcgaag acaaaaaaga aattataaaa agthttgaaa ttacctataa aatctatgaa  
7081 aaacttcaaa aacacggagc taaaatthgc tccatgggaa tgagtaatga ttttgaaatc  
7141 gctatthaat gcggatctaa tatggtaaga cttggaagta ttttatttht aaatthtaaa  
7201 taaaatccct tcttatcttt tatctgcat acttattgat aatthttctca ctaacgctat  
7261 cagaaataac aaaatcagta tgataaagca aacaagaacc cgtgctaaca atthtcaaaa  
7321 caagctthtt gttactthtt tcattthgat tatgagcatt ccttgctatt tctgtaattt  
7381 cataacaag ctctcgattc aatctthgaa gatcaagctc tatgatattg ttttcaaat  
7441 ctttaggttc tgctacaaag tctthatttt ccaaggcgtt tttcttagcg ctaaatthtt  
7501 ttaccgctt aacctctct tctthgaagc cctctagagt tthtaattgat cthaaagcta  
7561 agctatctaa tttaccctc tctgcttht agcttagtaa aaatccataa gcctcatttc  
7621 tagaggcttc atthttthaa atattthcaa tctctctat attagactca aaaaccgta  
7681 cttcaaaagt agaataaaaa tccaatatct caagcctacc ataacgcttg tthttttac  
7741 tcatcataga tthaaagctt tcaatcttcc ctatgcttht aatthttcca ttgctthta  
7801 gcgttgaaaa atctatgctt tttatataat ctatctctt aaatthttca taaaaacgat  
7861 caagcggatg tctgaaaca taaatccca aatctcttt tcaaattht agctthttca  
7921 taacctcaaa ttcttcatcc ttggcacta tattaacttg taaccaaca gthtaactcat  
7981 cttctcaaaa aagagaactt gctgcatttt tctthgcatc agccatttht ttagagcctt  
8041 cggthaaatt gtccatatta tcaacaagc actthttctg atagccaaat tcatcaaaag  
8101 cccccgctt aataaggctt tctagggttc tttgttgat cttgtgggc tctatctac  
8161 ttaaaaaatc atcaatattt ttaattctgc ctgctctct tgcctcaagt aaatthtcaa



8221 ctgcagggat tcccacactt ttaatagctc caagtccata aacaatagca tctttaccat  
8281 cttcttgctc tactgcactg aattcgcgta tagctttatt aacagaaggc gggagaagtt  
8341 tgatattcat ttttttcatt tcatcgatat aaacagcgat tttatcgaca ttattttctt  
8401 cacttgttag caatgctgcc ataaattcac taggatagta ggtttttaag tacgctgttt  
8461 gaaaagtgat caaggcataa gccgcagagt gagatttggt aaaaccatat cctgcaaatt  
8521 tgacaattaa ctcccaaagc tcttcggctt ttactctatc ataaccctgc ttttctgcac  
8581 catcagcaaa ttcacttttt aattttttca ttttttcggg atcttttttg cccatagcgc  
8641 ggcgcaccac atcagcacca cctagtgaaa atccacctat aatctgaaca atttgcataa  
8701 cttgctcttg ataaacaata accccatatg taggctcaa tacactttca agagtatcaa  
8761 atggatattc tatcttttta agcccatggt ttctatctat aaaatcatca agcattcctg  
8821 attccatagg acctgggcca taaagagcaa gaaccgcaat aatatcttca aaacgctcag  
8881 gcttttagcct tgcatttaag ttttgcattc cgcctgattc tatttgaaat atccctaaag  
8941 tatttccact ctgtatagtt ttataaactt tagcatcatt tacatcaata gcttcccaaa  
9001 ctatgtcttt attgtaacgc tttttaatga gcttgatagc attattgatt aaagttagggg  
9061 tttttaaacc caagaagtca aatgtgataa ggtctacatc ctccaaatga tcttttagagt  
9121 attgtgtaac caaatgtctt tcatcgtttt tgctttgcct aaaaagagga gtttttttcc  
9181 ataaactctc attagaaatc acaacacctg ctgcgtgcat acctgcattt ctattgagtc  
9241 cttcaagagc cttagcatac tcccaaactt caggaccctt tggatggcgt tctataaatt  
9301 ctttaatctt tggttctttt tcataagctg catcaagagt gattttaagc tcttcaggta  
9361 taagcttggc aagttcatct gcatcaggaa tactcatatc gcaaaccctt gccacatcac  
9421 gaatcacccc acgagctaaa agcttaccaa aagtaataac ctgcgcaacc ttatcagctc  
9481 catatttatc aatcacataa tcaatcactt ctccgcgtct atcttgacaa aaatccacat  
9541 caatcgggg cattgatacg cgttctggat ttaaaaaacg ctcaaaaagc aaactataag  
9601 ggatcggatc taaatctgta attttcaaag aataagcaac caaactacc gcggctgaac  
9661 cccttcagg acctacagga attcctttat ctttggccac cttgataaaa tcatgaacga  
9721 ttagcatata gcctgaaaat ttcatttttt ttatgatatt gatttcaact tcaagccttg  
9781 ttttatattc ttcatgcttg cttatatcaa cgaattttta cctttcctca agtccttttt  
9841 taciaagctc atcaaaaacc acatcatcat tatcaaaact aaattcttta ccttcttcgg  
9901 gcaagcttat attatattct tttgcatatt ctcttgtaaa tttaaaattt ggtggggtag  
9961 gatttcctaa attgagctct aagttacatt tattagcaat ttcttgagta ttttcaatag  
10021 cttcaggtat atcagcaaaa agctcactca tttgcgctgg agatttgaca taaaattcat  
10081 gaacgctatg gcgtaaacga tcaggatcat tcagcttttt acccatagca atacacataa  
10141 atacttcatg agcagccgct ctttccttaa aagtataatg ggtatcattt gtagcaataa  
10201 ttttaatatt caattctttt gagagtctta taatatcatc gtctatagct ctttgatctc  
10261 ctataccatg acgcataaatt tcaaaaataa aatcatcgcc aaaaactttt ttataccata  
10321 aagccgcttc tttagccgct tcataaccct tggctccaaa acgaacattt ctttactat  
10381 gaatatttaa atgccaattt acctcacctt gtaagcaagc tgaagaacag ataagtcctt  
10441 cgctatgctc ttctaaaagc tttttattga tgcggggata ataatacaaa cccttaatat  
10501 agctttgaga acttaaaatac attaaatttt gataaccaac ctcatttttt gcatataaac  
10561 aaagtgaaa tctttgacgc gagctttttat ctgaaatc ttcatgattg tgcaaatatg  
10621 cctcaagacc tataataggt tttaatcctt gagaacgcat agtttgataa aaatcaattg  
10681 ctccaaacat attgccatga tctgtcatag ctacacttgt agcaccctgt tctttaagag  
10741 ttttagctag ttctttaagt ttattagctc catcaagtaa agaataattct gtatgtaaat  
10801 gaagatgggt aaattggctc atcgtcttcc ttgaaaaata taaatactaa agattttgat  
10861 aaaaattata aatttttatt gctgaatttg aaagaattta tggctaaaaa ttacctgaaa  
10921 tttatcatgg tgattttatt accatgagca aatatatttt aagaatattt aaaaaataaa  
10981 atagtaaaag tttttaagat tgaaagaatg agttatcttt caagaaataa aattacgaaa  
11041 tttgttcata ttctttgcca atataaattt gattatctct ttctataaca ggacgcttaa  
11101 tacagcttgg attttctaaa atgatatttt tcaactcaag ctcaacttaag ttctctatct  
11161 tgtctttatt taaaccgagt ttttttgagg tggctcctgc agtattgata atttcgttaa  
11221 attttttata tttaagccaa ttttcaagta tattcaaatc aatcttttta atatcgataa  
11281 aatcaaactc tagagctttt tgatttaaaa attctagagc tttttttacg gaattacagt  
11341 ttttaatccc ataaactttc attttctcac ctttttaacc aaatcagcaa ttaaaaacgc  
11401 aagctcaaga gcttgatccg cattaagtct tgggtcacac tgtgtctcat agcgtttttc

11461 taggccttgc gcagtaacat tactagcacc acccgtacat tcagttacat cctgtcctgt  
11521 catttcaaga tgaactccac ccgcatatac accttcactc atagctatntt caaagaaata  
11581 tcttacctct tgcatgattt tatcaaattc acgcgtttta aaatcacctg cttttacggg  
11641 attgccatgc ataggatcta tactgtaaac taaatttaag ccctcttttt taagcttaga  
11701 gaaaatttta ggcaattgag ttgctatntt ttcagcacc attctgatga tgatatttaa  
11761 tctaccctct tcattgttcg gatttaaagc attagctaaa gctatcacat catcagcact  
11821 tgcatttgga cctattttca ctcccaaagg atttctaacc ccacttaaaa aatgcacatg  
11881 agcctcgtca agacctctag ttctctcacc tatccaaagc atatgagccg aacagtcata  
11941 aatttcaccg cttaaactat ctactctagt taaagcttc tcataaggca aaagcaaagc  
12001 ctcatgagag gtataaacat caacttcttt taaacttgga gtattatagg tattaatacc  
12061 acaggcctcc ataaaaatcta aagcttgaga gatcttctcg ctgatatcag tatattgttg  
12121 atgcaattca ctttttttca agaagcctaa attccatcga tgcacttctg gtaaattagc  
12181 tagtccctct ttagcaaaaac cacgcaataa attcaaagta gtagcacttt gatagtaagc  
12241 ttcaagcatt ctatttggat cgggaattct agctttttca ttaaattcaa agccattaat  
12301 gatatcgcct cgataacttg gaagttttac tccatctatc tcttcataat cactacttctg  
12361 tggcttagca aactgccctg ccatacgacc aattttaaca actggacaac caccgcaaaa  
12421 agttaaact atagccattt gaagtaaaat tttaaacata tctcgtatat ttactgctcc  
12481 aaaatttgca aaactttctg cacaatctcc accttgagat aaaaaggcct cttttcgga  
12541 tactcttgct aaagcatttt gaagctctct aacttcacct gcaaaaacca aaggaggaag  
12601 tttttcaagt ttatttaaaa ctttattcaa ctctcttga ttagaataaa taggctgttg  
12661 tttaatagaa aaatttttcc aagaattttt agtccaagtc atcgttatntt cctaaaagat  
12721 ataatttcaa cttcccctat aggtcgagta accaaaagga gataaggtaa taggtacatg  
12781 gtaatgtttt tgatctttta aaagttcaaa acttacttct acaaaggggt aaaagctatc  
12841 aactttgcgt gacatataat aatctttggg ataaaaattg agtttataaa ttccagaagg  
12901 acgattttct gttttttcat aaggaagtaa atcgcttatt ctgccatttt tttctgtgaa  
12961 tttttcactt atcttaatcc attgttgatt tttattcaaa ctataaagtt ctacttttac  
13021 attggatgcg ggctggccag aattaatatc taaaatatgg gtgcttaact gatattcagc  
13081 tgcgtttaga aatattggta tacttatgag agccaacaaa atttttttca tagaaagcat  
13141 atttttctcc cttaataata ttttatatat ttaaatacata acaaaatatt attaacaata  
13201 ataactaaat aataaatttt ataaattagt taaaaatata tttattcaaa aaacagaaag  
13261 aactaaatc tgcaaaaatta ttattttgca gattatnttt taagttcttt aatacgtgct  
13321 gctttaccgc gtctatctct aagatagaac aatctagcac gacgaacacg accttttctt  
13381 aaaacagtaa tgctctctaa gctttcacta taaattggaa aaattctttc tacaccaacg  
13441 ttatttagcac ccattttgcg aacaataaag gtttcatcta caccattacc tcttctagct  
13501 atacaaattc cttcaaaatt ttgaatccta gttttatcgc cctctttgat gcgaattgca  
13561 agtcttaaag tatcgccagc acgaaattct ggaacatttt tccctcaat ttgttttgcc  
13621 tcaaattgct ctatgtatntt atttttcata aaaaattcct tttttttgct gttcatgctc  
13681 taaaaataaa tctggacgaa aaaatttctg tttgcaagac gctaaagtag tttttaaagt  
13741 cgcaatttta gcgtgattac cttttaaaaa ctctgaagga gtgtaaaatt tcttgaaatt  
13801 ttgttcaaaa ataaatggtt ttgcaaatga aggagcttc aataaacat tttcaaaact  
13861 ttcctcttct aagctgcaag cattacctaa aactccattg atatttcttg cgatagcatc  
13921 acaaagagta agcgtggaag gttctccgcc tgttaaaata aaatctccta tgctaaatac  
13981 ttcattagca aaaatttcta ttactctttc atcaatacct tcatatctcc cacaaacaaa  
14041 aacaatattt tgtttcttgc ttaatctctt tgcacttttt tgattaaaag tttttccact  
14101 tggattttaga aaaataaaat aaggattttc ttcattatct ttgataaatt ttaaagtgtt  
14161 ataaaggggt tcaacttgca tcaataagcc agctccaccg ccaattttat aatcatctac  
14221 tttatgataa atattgtccg taaaatctct aggatttaaa aagtcaagct gaaagagttc  
14281 tttttggatt gctcgagaaa gaatagaatc tttaaaataa aattcaagca aattaggaaa  
14341 caaagaaaca aaactaaact tcatgaattt tctaagatta aaaaagcatc tttggtgcaa  
14401 aaaatagaat atttttctat atcaatttta ttgacatatt tatcaatata gggaataaaa  
14461 aaagttttag cataagcttt atcaattaac tcttgatcgc tttgaatttc aaataaataa  
14521 gaatctccta cttcaagaat atccaccact ttcccaacc ttcgctcatc atcgaatact  
14581 tcgcatttta aaatatcaaa ataaaaaaat tcatcctttt tcaatatgca agtttgtctt  
14641 gtagcttcaa tactttgata aagaattaga ttaataagct gttttgcagc ttcaacattc

14701 tcataacctt caaacaaaac agaagagtta gctaaattgt agtgtttaat tttcaactga  
14761 cttttgccat tttcagtgaa aaaagaagct ctttttttaa attgctggat aaagtcactt  
14821 aaattataaa gttttaaata tcctttaagc ccaacagttt ttccaagttt ggcaacttga  
14881 ataaaatttc tttcactcaa gtgctttaac cgttacacga tagctcattg aatctttgct  
14941 cttgcaagct gaaacgactg tctttattgc attaatcatt tttccatttt taccgataag  
15001 tttaccctg tcaactttat cagcataaag tatgatttca gcaaaatttt catcaagctt  
15061 tattttttct gttgtaattt tatctggata atctgctata agtttagcat actctcttaa  
15121 aaaattttct accatgaaat tatttactag taatagaagc tactttatca ctaagttttg  
15181 caccaacgct tttccaataa gctagacgct cagaatcaaa tttcaccact tcaggctcaa  
15241 ccataggatt ataataccca atactttcta tccatccacc atcgcgacgt tttctactat  
15301 ctgttactac tatacgataa aatggctctt tagttcttcc cattcttgta agtctaatta  
15361 ctgtcatata ctctccttaa aaataaaaat tttttaacta tagatactat gaaaagtatt  
15421 tatagataaa aaatctaaaa ttgtcttcta gcttgattca tcatttgcatt taaactatcc  
15481 atgccctttt ttcctgaaaa tctcttggcg agtttagcag catttgcaaa ttgctttaaa  
15541 aagcgattaa cctcaacttg agataagcca gcaccttctg caatacgacg ctttctagca  
15601 ttattaagca aatctggatt ttctctttct ttttagcgtca tagatgagat catagctttg  
15661 atatgtatga tttcttttaga attatctaga tcaagatctt ttacacttga agcaacatta  
15721 gaaagtccag gtatcattcc tataatggat ttcattgctac ccaatttttt aacactctcc  
15781 atttgagtta aaaaatcatt aaaatataac tcgccttttt tgattttttg atttaatttc  
15841 ttagcttctt tttcatcgat aatagtcgcg gttttttcag ctaaagtcgc caaatctccc  
15901 tcaccatta tacgattaac tattctttcg ggaataaaaa tttctaaatc cgctatcttt  
15961 tcaccacgc ctacaaatct caaaggaatt ccaatttggt tagtgatacc taaagctata  
16021 cctcctttgg tatctgcatc aaatttagat aaaattactc ctgtaatctg taaaagttca  
16081 ttaaaacttg aagctgtttt aactccatct tgcccactca tagcatcagc aacataaaaa  
16141 atttcatctg ggtttaaggt atcttttacc gcttttaatt cattcattaa agcttcatcg  
16201 atagctaadc ttcctgacgt atcgactaat aatacatccg ccatagaatt ttttgctttt  
16261 tctaaagctt gttttgcaac tttaatcgga tctttttcat tttcaatata aaaaagctct  
16321 aactcattgg cttcgcaaag ctgtttgagt tgctctactg cagctaaacg ctgtaaataca  
16381 caagcggcta tcaaaacttt tttattgcga agttttaagt agtttagcaag cttaacagta  
16441 cttgtagttt tacctccacc ttgcaaacct accattaaaa caacagttgg aggcttagta  
16501 gcaaaaacaa aaccttgatt ttttccatcg ccatttagaa ttttttctaa atttgcttta  
16561 atagcttcta aaaattgctt ttgccctatg ccattttttt tcacatcttc ttcaataaga  
16621 gaaagtaaat ctttaaccac cttatgggtg acatctgctt ttaatagagc tttttttaag  
16681 gtatctaaag catttttaag cgctttttca tcatcaacaa aacgaagttt attaatgctt  
16741 gatttaaaag attcgctgac tagttcaaac actttattac ctttctatta ttttcaaatt  
16801 taagttgagc attatacaaa atcttttctt aaatggcttt aaaaatctaa attttttatc  
16861 tcaaaaccaa gctttgcaaa actaggatct aattctgcct taaactgata atttaaaatt  
16921 cgaatttcat aactatgcaa atacatccta tcgcttgaaa tcttagcata tttttcatct  
16981 cctatgattc catgctttat aaatttagca tgcactctta tctgatgagt tctacctgtt  
17041 ttaataataa ttttagctaa agttttttta gcttgcatca taataggagt aaaaatacta  
17101 accgcgctta aaccttcttt agaaatttta cttaaagctc catttttagt ttttatagtt  
17161 aatataggct cattaatctc aacttcttct gctaaaattc catctaaaac agctatataa  
17221 cttttatgaa ctctttgttt tttaaactct tcaatgcata tctttcgaag atcttcattt  
17281 ttacaaagca atatgacacc actagtttct ttatcaagac gattaagcaa cttcgcattg  
17341 aatttttttt caagctcctc gctgatatag gcatagggtt tttttatagc aatgatattt  
17401 tcatcttcaa aaattacttt aggtttgctc gttttcacia tactaaattt cgtcttatca  
17461 ctcatcaaag ctcttgccac aaccaccttt ttaccatgag aaaaaacgca acctttatct  
17521 atcaaatctt ttgcttcgcg atttgaaata ttttcttgca aagctaaaag ttttatgctt  
17581 ttttcttgca tcgatacctt cctgtatagc ttggattatt gttgataaat cattattttg  
17641 tgctattttt gcttttaaat tataattatg aattatacca tcaagttctt ttaaatcttc  
17701 gcaaaaatag acattatcta cttcttgaaa taagcttttt tgattatgta tataaactcc  
17761 acttatcaat acattgttaa aatgagctac ttctatggga ttatgccctc ctatcccttc  
17821 aaaaaaagaa ccacctaata caaccacatc tgaaatggca taaaaattta taagctcacc  
17881 taaacaatcc aataataaaa tatcttgatt aaatttttta tcttcatttt gcaataaact

17941 aaatttatca aatttcaaac ctttatcatg caacaattgc tccacttcca aaaaacgttc  
18001 aggatgcctt ggggcgatga ttaatttttc ttgtttatcc atcttataat gcttgagtaa  
18061 aagttcttct tcgcccttat gagtgcttgc aaaaataatc aatttttgct taggtttaaa  
18121 gtatTTTTgt gcgggacata tttgcaattt ggatttaata tttggaaaaa ttttaacatt  
18181 ttttagcacct aaatcttcca atcttatttt atccgcttca ctttgtgcaa aaacttcac  
18241 aatatagcaa aaaatttttt tataaaaaaa tctaaatttt ttatagcttg catatgaatt  
18301 atctgaaatt ctagcattta gtaaaataac cttgcttttt tgaagctttg ctataaaaac  
18361 gaacattaac caatactcag cttcaaaaat cactaaaacc ttgctaggtt tgagccaaaa  
18421 tggaatccaa ttttcaaaag caagataatt tactttattg caaatttctt tagcatagtc  
18481 ataaccgctc tgcgtaatag tcgtaattct tgaatcaaat ttcaaaaaca gctctttaat  
18541 gctttttgcc tctccatag agcaaacatg aaaatgcaca tccgatcttt tttgagatat  
18601 attacgaaag agaaaaaatc tagcctttaa gctattttta tattttggct taataaaga  
18661 aagtaaaaaa agtgggatag cgcagagtaa aaaagctatc cacactaaaa tataataaag  
18721 aaaaatcaat tttgatcttc ttgctcttta tataaaattc ttccacaatg agggcaagtt  
18781 ataatctctt cacctttaat cactgacaaa taagttttat cataaatttt catgaagcag  
18841 ccataacaag cttgtttttt aacgggaact acggctgtat ttttagccca ttttctaate  
18901 ttctcataaa agcttaaaac tttttgattc atctctgcaa ctaatttagt ctttttagca  
18961 taaacattca ttctttcttt ctccaagcca tccatttgag aactaatgct tactcttatt  
19021 tcatctaaat tttgctcctc ttttgccttt tcttcaaaa gttctttttt gaaaagctct  
19081 ttattttcta aaattttatc caaacgaaca atctcatcat tagccgcac aagctgctct  
19141 ttagcgatat cttcttcgat ttttaaagca tttgcttctt tttctgtctt aacagctcca  
19201 ctcttttttag aaagctcttt gatttttagct gaaaactctg aaatatgagc gttattttga  
19261 actttttgat tttctacatc ttgaatttca ttttctaaat tatttaattc aacattaat  
19321 ttagcaatct tattttcagc atcttttaa gtcttgctaa tgctttccat cttcggttca  
19381 aagctgtcaa tttcttgatc tatttttgat aaaagcacta attgttcgag atatttattc  
19441 atttattttc cttaaaaata ttgaaatgga tttttgaaa ctgttattat aacttttagc  
19501 ggcaaatttt tcaagtgttt taccaaacat tgagcaaaat agcgttcgct ctcaaaatgt  
19561 cctaaatcaa tcaaattag atgattgctt atggcttcta aggcttgatg gtatttaaaa  
19621 tcgccactta aatagcaatc tgccttaact tcatttaata aatctcccc gctccctgtg  
19681 caaacagcca agcgttttaa atgctccttg ccacaaaaac ttgttcttag aatttctaaa  
19741 ttttaagcgt ttttaaccaa ggtgcaaagc tctttaaaag tcatatccac atctacataa  
19801 gctaaaaatt tatcttttaa agaaatttca aatcccaaaa tttcttctat aaaataagta  
19861 tttaaatgac tgagatcgaa attagtatgc atagaaatta aagaaagatt ttttctaagc  
19921 atctccttaa taaaagctct aggataagct gaatttgcca aatccttcaa acctttaaaa  
19981 atcaaaggat gatgtgtgat aaacaaggaa ttttcttctg cgttttgaat caattgctca  
20041 tctatatcaa gacttaaata aacattatga atttcatcgt caaaatttcc aagtaaaaaga  
20101 ccactattat cccaaatttc ttgagtttca aaaggactta gcttatctaa aaaattataa  
20161 atttcaatca gtttcatcta aatttttctt ataaatttca gcacaagttt tcgaaagctc  
20221 gcgaattttt agcatataat cttgtctttg cgcaacagaa atagcaccct ttgcatcaag  
20281 caagttaaaa gtatgagccg caagcataca ataatacaca gcaggcaaaag ctaaacttg  
20341 ctctaaaata cttttacatt ctttataagt gttctcaaat tgctgattta aaaaatctac  
20401 attactgatt tcaaaattat atttactgaa ttcatattca ctgcgtttat gtacatctgc  
20461 gtatttaatt ttttctccat taaattcgct ccaacaata tcataaacat tatccacatt  
20521 ttgaagatac atggcaattc tctcaagtcc ataagtgatt tcagcactta ctaaacttac  
20581 cgcgattccg ccaacttgct gaaaataggt aaattgagtc acttccatac catcgagcca  
20641 aacttcccaa ccaagacccc aagcgccaag gcttggactt tccaattgt cctcaacaaa  
20701 acgcacatca tgacttttaa gatcaaagcc caaatttca aggcttttta aataaagctc  
20761 ttgaatatta tcaggacttg gcttcattaa aacttgaat tgataataag ctcccaggcg  
20821 attaggattt tctccatctc ttccatctgt tggacggcgc gaaggagcta cataggcagt  
20881 agccaaggt tttttaccta aacttcttaa aaaagttgcc ggatgaaagg ttccagcccc  
20941 tgctggcata tcataaggct gcataatagc acaaccttgt ttttgccaaa attcttgtaa  
21001 atttaatatc atttgcgaaa aagtcatttt aaccttcttt attttcattt aatttttcat  
21061 ttgttgtgct agaattttca tcttttttca tttccaaatc aggctcagtt cttgccccaa  
21121 aaatttcagc tgtcttactc cacataagct tatatttgcg ttttaaaaa tctatttctt

21181 ctcgggcatg ttttaattca tggtttaaaag tttcaatagt ttttctatct tcatcataaa  
21241 gctcttgcac tgaataaagt gcatctttta aaaatttatt ttcatttttt aaagcatcaa  
21301 gggtttcatc ctttgcacatc aaaaccttct catgcaaatt taaaatcgtc cctatggttt  
21361 tttctacaaa gctttctcct gctaaagtca tagaatttac catggcaggc tttgaattag  
21421 aagcgcttgg aacaacgcta aaagttcctt gatttgcctc gatataaatt tttccctctt  
21481 cttctttaaa attcaaagcg ccatttggca tcattccttt tacaacatct tcattttaat  
21541 gcacaagttt gcaaaaattct tggagctcta aataagtttg cattttcatc cttttataat  
21601 aaaacttcta cgctcttaga atcgcttatt aaattttctt cttgattttt tctatcttgt  
21661 tttaaagcct ctgccaaagc ttcacatctt aaagcaagaa tttgcatagc caaataagct  
21721 gcatttttag cccctgcttt acccactgct aaagttccta cgggaattcc acctggcatt  
21781 tgtacagttg aaaataaaga atccatactc gctaaagcac ttcctggcat aggaactcct  
21841 aaaacagggt tagtcgtata agccgcaact gctcctgcta aatgtgctgc cattccagca  
21901 gctgcgataa aaacttttagc tccttttggt tctgcttctt taatgtattc tttagttcgc  
21961 tttggactac ggtgcgcaga actgataata agttcatatt ttacaccaa ttttctgagt  
22021 gtttttagcac attcactcat gatttcataa tcactcttgc ttcccatcac aattgatata  
22081 aatttcatcc aatttccttt cttaaaaagc taaaactgct gattttattt ggcattttta  
22141 tttcgttttc atttccgcta tgaatttcat taaattcttt attattttta gaaataagtt  
22201 ttttaaattc taaaaatat ttatcttctg ttttataaat tttaccaat tcattatcac  
22261 aagactgat tttatctcct aaaggcatta aaatttcata ggctttattt aaaacaatct  
22321 tgcccttgca tttaaaatat tcaccatcct caacgatagc atgcacttga tgagtgcctt  
22381 cttctatact tgtatcgtga ttttgcgtat ctgctttttc caaaggacgc gagacaagat  
22441 aaccatctgt aaagccacga tttttaagtg tggcaatttc ttttccatcac ttacttgctt  
22501 caaatttgcc ttctaaagca tcttgtatag ccattttata agttctagtt gtaagtgcga  
22561 cataatactc acttttagta cgcccttcta ttttgaatgc acttatacaa tcttcttgca  
22621 taattttttc tatataagaa cacaaattta aatctttaga attaaatata tgagtaccat  
22681 tttcatcttc ttccaaacga aaaagtactc cattttcagg attttttgca taaagctcat  
22741 aattaaatct acaatcattc gcgcaagagc cacgattact cattctcca ctttggacag  
22801 aactaatcaa acagcgacc gagtaggcaa aacacatcga tccatgcaca aaagcttcga  
22861 gctcaatata acaattttct ttttaagctt tagcatcttt aagaccaat tctcttgca  
22921 taacaactcg ttttgcacc atatctttat aaactcttgc atcaagatag tttaaaacat  
22981 tagcttgagt agacacatgc aaagctatct caggagctaa ctctcgaacc aaggccatcg  
23041 caccactga agctactata aaagcatcgg gcttcatttc ttttaagttt aaaatatggt  
23101 tttttaaaga ttctatgtt cgcccaaatt gaaagccatt taaagtaaca taaacctttt  
23161 tgcctctttg atgagtatat ttaatagctt cttcaaaact ctcataatta aattccctag  
23221 ctgtgcgaga acgcaaagaa aaattatata cccctgcata aactgcatcg gctccataag  
23281 ctaaggcgat ttttaattta gtaaaatttc ccgaggagc tacaatctct ggaataatca  
23341 tttttgacct aaactcgcta tgagtgcttc tatatcatca ttacttaca tatcagtagt  
23401 agaatcacct tcaatatgaa ccgcagaact cacacgtttt ttatcatcaa ttctacctc  
23461 aaataaagaa ctcatataac gactcaaggc gcgcattaca ttgataacgc gttcaatttt  
23521 ttgacggtga atatcttggg attgcatagc atccattgcc atcattactt catcttgtcc  
23581 gcattgtaat ttatcaataa tttcttggct tgcttttttc acttttgaat ttaattgtaa  
23641 tgcctcatta aaactaaca catttgggaa tttctcgttc agttttgaaa atatttcaat  
23701 attcttactc aatgccttat caatttcact aaacaaactt tcagaatctg caaagaaact  
23761 attaatactt tctaatttat ccatcatctc ggtagctttt aattcgctat ctttagtaac  
23821 atcatcgagc tgatgaacca ctttatgctc ttggtttggc ggggggtggtg gccatacaac  
23881 actaggatct ggtttataat cagacacctt tacatcttct aacatcaatc cctcttcaga  
23941 ttctaaatga gactctgttt cgcttttatt gttagactct gcacctcat caaaatttac  
24001 atcaccattc atcaaggcgt caagttcttc ttgagtcac tttttccttt tctaaaccta  
24061 gattttattt tggactacg attataatca aatttatcta aatgaaaat ataaatttaa  
24121 attttcatag ttttgtaagt aaatttcaaa aaatgattaa aaaaatatat taattaaacc  
24181 tgaattaaaa aaaatatgat acaattttca taaattatct taaagaagga gtaaaagatg  
24241 ggcaaatttg ttaacaatgt tgatgaattc ttttaatttt gcaaacaaaa cgaagttctt  
24301 tttgtagact ttcgctttac tgatagata ggaacttggc atcatatcac ttataatctt  
24361 catgcaatta gtgaagaaac ttttgaagca ggaattccat ttgatggtag ctcgattcat

24421 ggatggcagc ctattgaaaa atcagatatg attttaaaac ctgatgcgca aagtgcattt  
24481 ttagatcctt ttacagcgga tcctacggtt atagtttttt gtgatgttta tgatatatat  
24541 aaagggcaaa tgtatgaaaa atgtccaaga agtatagcaa aaaaagcaat ggagcacctt  
24601 aaaaatagcg gtatagctga tactgcttat tttggccag aaaatgaatt ttttgttttt  
24661 gatagtgtaa aaattgtaga tacaacccat tgttctaaat acgaagtgga tacagaagag  
24721 ggagagtgga atgatgataa agatttcgca gatagctaca acacaggcca tcgtccacga  
24781 aataaagggtg gatattttcc tgttcaacct atagattcct tagtagatat tcgttctgaa  
24841 atggttcaaa ctcttgaaaa agtaggactt aaaacctttg ttcacatca tgaagttgca  
24901 caagggcaag cagaaattgg ggtaaatttt ggaacacttg tagaagctgc ggataatgta  
24961 caaatctaca aatatacgt taaaatggta gctcatttaa atggaaaaac agcaactttt  
25021 atgccaaaac ctctttatgg cgacaatgga aatggtatgc atgttcatat gagtctatgg  
25081 aaagacggtg taaatttatt ctatgacaaa gaaggctatg gaggacttag tcaaaactgct  
25141 attaactata taggcgggggt tttgaaaaat gctcgttctg ttgcagcttt taccaatcca  
25201 agctctaatt catacaaaag aatagttcca ggttttgaag ctcttgtat tttaacctat  
25261 tcttgccaaa atagaagtgc aagttgtcgc gtgccttatg gaataggtaa aaattcagct  
25321 cgtgttgaaa ttcgtttccc tgatagcact gctaactcct atctagcttt tgttagtctt  
25381 ttaatggcag ggcttgatgg aattaaaac aaaaccattc ctgtaggacc tatggatgaa  
25441 aacttatttg atctcacctt agatgaaatt cgtgaaaaag gcatagagca actaccacat  
25501 accctaagag gaagtcttga agctttaatt cgttacaacg ctttcttaaa acctgtaatg  
25561 agcgatatct ttatagatga ttatcaacat ttaaaatttg aaaccaagt ttggcctggt  
25621 gaagcacgtc caactgcata cgaatttaaa acttgctact cttgctaaat aaaaagcaaa  
25681 gcgaaatttt aaacgctttg ctttattttt attgataact tcttaaattc ttacttttca  
25741 atattgtata aattcacttt caaaaagaat caaaaattat tattgttaat attgcatcag  
25801 aatttctaata ccctaatttt atatatatta gaaattgatc gattatactt catttgaatt  
25861 gttttttcat tattttaaac ttgaataata ttttagattt aatgtttgat aattttatac  
25921 cattgttgag aatataatc ggataatgta attataaata tgtaaacatt ttagccaatt  
25981 aataattgga aaaatttatg gcataaaaaat accataaatt tatatgatta atttaaatta  
26041 tctttttaat tgattgacaa ttccaagcat atcatcactt gtcgtgatag ctttgaacc  
26101 tgcttcgtaa gctctttgcc ctgtgataag atcagtcatt tcttcaacaa gctgcacatt  
26161 acttagctct ataaaacat gtcttattgt tccaagtcca tcttgagttg ctatacctgc  
26221 cacaggtgca ccgcttgctc ctgtttcaag ataaagatta tctcccatag aatgaagtcc  
26281 agctggggtg ataaattgta caagttcaac ttgaccgatt tgtgtttctt gttgttctcc  
26341 tgggaagcatt acagaaactg tgccatcagt agccacatta atcgcagttg ctccttctgg  
26401 tatagtcatt tcaggcaaaa gcctataacc atctgcatta acaatattcc cctcattatc  
26461 ttttgtaaata tgcccatttc ttgtataagc tatcgtgcca tcagggagtt gaatttgaaa  
26521 aaaaccattt ccagcaattg ccatatcaag accatctgtg cttgtagcct ttaaattacc  
26581 ttcagtaaaa acctttgtca cagctgtcgg gcgtacacca atacctactt ctatgccga  
26641 tggagaaagt gttgttgctg aagttgaagt tcctgcatat ttcataactt ggtacattag  
26701 atcagcaaat tctgcacgac cttttttaa acctgctgtg ttgacatttg caatattggt  
26761 tgaagtaaca tcaatttgtg tttgctgtgc taccattccc gtagcagcag tatgaagtga  
26821 tctcatcatt ttctatcctt taatctattt tatattattt tatttaacag ctgcaagttt  
26881 attgatagct tcttggttta aatcatccat atgagctgtc ataacttttt gatacatttc  
26941 taccattcta tttgcctcta tgagccctac catttcgggtt actggattga cattagagcc  
27001 ttgagaaaaa cttggcgga ctgcattgga attatcaaaa tctctaatac gcgttaaatac  
27061 atctatccta taaacattat ccccatcttt ttgcaaagct cttatatcat ctacttgagc  
27121 gataaataat cttgcatttt gaacaccatc tacttcaatg cttccatttc tgtccacatt  
27181 gatataaacc gcgccatttg ggatacgaat tcctgcattt tgaggattat taaaataatc  
27241 actgcttaaa attctatacc cttgcttatt gaccaaaata ccctcttcat taagctgaaa  
27301 atttccatct ttgcttaatc ttatttcacc atcttttagtt tgaacaaat aaaaagcatc  
27361 tcccctagtc atagccaaat ctaaaggatt gttagtgcgt tttaaagagc ctaagctaaa  
27421 atctgtatat cttgtgaaa cttgaggaac accatctata gtagtattta caaatcttga  
27481 tgcactcctt gtatgatttt ctataggtaa ctcatcctga gtttctttaa aaatcctttt  
27541 aaaatctgca attacaacat catctctttt gtaaccactc gtgttaatat tggcaagatt  
27601 atttgtgata acatcaagtt tattaaattg agttaccatc ccgccggtg cttgataata

27661 tccatthttgc atatthtttca cctataaatt ttaatatthtt aatthtataaa gcaaagagtg  
27721 ttccaacttht ttaaaaagaat gaatthtttagg ggattagatg aataaaaaata aaaagcaaga  
27781 tttataaaaaa tcttgctaaa aatatthttcg ttttagtcca tttgacggcg taagaaagta  
27841 ggagthttcaa tttgagccat tatctcttca tcaaaaccac cacttacttht tctaaggtht  
27901 aaataaggat tthtttttagg agcttcagcc tcttctgcag cthtttttagc catactgtct  
27961 ctatcttcaa atcctgtagc aataatagta acttctacc tatcttccat gctatcatca  
28021 gtagtagaac caaaaataat cthttgcattc tcatcaacia tthcttcaat attatthtga  
28081 gcagcagaaa tthtcaatcaa agagcaatta gaacttgtht taaaatgcaa aataaccct  
28141 ttagcccttht taatatccat accatctaat aatggagatt ctatggcatt agaaagagcc  
28201 tcttctgatag cathtttctc actagcacta cctacacca taagtgtcaa accacgatga  
28261 ctattatgg ttctaacatc agcaaagtca acattgatat cgccattatc taaaagtata  
28321 gaaaccatac cthtaacagc acgagctaaa atatcatcaa ccaatthtaa agcatcctta  
28381 atccctgctt tthttatcaat aatacttaag agthtttctat tthtgaatcac aaggatagaa  
28441 tcactthtctt tthttgagthc aaggagthca tthttcagcaa gthtttttct tthgtthtct  
28501 tcaaaagcaa aaggcatagt tacaacagaa acagthtaaag cacctatthc tthtagctgt  
28561 tgtgcaatga ctggagtagc gcctgttctc gtgccaccac caaaacctga agcgataaaa  
28621 acgatatcac tthtgactaag actagcttht atctcttcaa agctthtctc agcactctc  
28681 gcccaacct ctggcaacat acctgcgcct agtccctthg tthttttctc gccaaagthga  
28741 atthttgtht ttgctaatga atthtgaata gcttgtgcat cagtattagc cgcgattaaa  
28801 tcaaggthcat ttaagccat cthtgaccata tgattaatca tathttccacc gccaccaccg  
28861 cagcctataa cthtaattht agcgccttht ttagthtga tctcttctac taaaatthcg  
28921 ctcaataaaa cthttctctt gthtaaaatthg atthcattat ttagthcaaa tathttgaaa  
28981 aacattaggt tthttctctt thggctcttht aaaaatcta tthgtctthga atathattgt  
29041 atcathttct tgcaaattht cgcaaaaaa atcagattht gthttcatht ccactthctt  
29101 thgtggaatt atthctthgt taatthtgac gthtgaatth tctatctccc cthttatct  
29161 taactthtca tthtgaatcaa gthtataagg cthtaaaata cthtgaccat ataaacaaag  
29221 tcctatagca caagthattth caggatcgtht aaaaatthca cthaaatccag thaatcaatc  
29281 tthttctagca gtagcaagtc taacagaacg gthtatcaaaa gthtgaggag ccaactcgthc  
29341 aatacctgct aatthtagthc thccaccctg caatacaaca ccaccacta tactatthtg  
29401 ataacgatta tcactthaaa tthtagctaa aatcathaaa gthttctcag ctctthgcgta  
29461 aattacatht gaaatgatat cthaaagaac thcaththact tthctthtcat ctccataga  
29521 aggaatthgt atcaatgcat taggthgtthg agaaagagct gcataattht atthtaattht  
29581 ctgagctthc tthtaagggg tatgcaaagc catcgataaa tctthgggtaa tathaatcga  
29641 tccaatthgc aaacaatcat tatagcgaat tgaatthcca gthtgaacta ccatatcgca  
29701 gatggctcca ccatatcaa tcaaaacagc acctagthtct tthttcactat catctaaaca  
29761 agctatagct gaagcataac cagaaaggac tatathatca actctthaaat cagccaactc  
29821 aacagcttht tthtaattht taatatgaga thctthgagaa ataactatat gaggthgaac  
29881 ctccaaacga thaccgctca tacccaaagg atcatctaca thttctaaat cattcacct  
29941 aaaattataa gthtaaacat ggataatthc ataaccgctt ggaagatthg cagthgtgct  
30001 agctgtactt accgcacgat gaatthcttht gatgcctatc tcatgattthg gthtattht  
30061 cacacctatg ctgtcaacac tthtagthtata ggcacctgaa atagaaacca ccacttht  
30121 ataatgaaca ccgctcatca tthtctgcatt tctaaactgct tcttcaatcg atthttgaggc  
30181 aagthtgcata thtagthaatg cgcctthttt tacaccatta gthttthgctt thtcaaaaacc  
30241 aataatthtt aaacctctc catctthttg agcgacaatg gcacaagtht gthtgcgaacc  
30301 taagtcaatt cthtaatat tcaaaattht thaccttht aataaattht taththgat  
30361 gthttthttaa gctctthgat caatthctgt thcaththcat thgctthttaa gthttthttaa  
30421 thctgathaa gcattgtgcg atathgtgta aatthttcag gathcatatc aagctthtgc  
30481 thattaatth tataaagtht agcctthtct tcaatthaaa thaacataaga acgthttthga  
30541 tcagaatthaa aaacathcat taaaaataa cthaaatthcg cthcaththaa thataacta  
30601 atcttagcat cathtctac agthtctctg cthtaaaaac cthataatthg tccgctaaaa  
30661 tthttctaaat thtgcctagc tthttctctc aaatthcttht thacctgthc gctgataaa  
30721 ataggcataa gctctthccct agcctcatca aaagthctthg thctthtagg atthggthtthg  
30781 ttaagthtthga thgataatata acctthttga thttactcg gthctthaac atctccatth  
30841 thtgcctctag ataaagctthc aagthgggthaa thaaatctg agthtctgtht atthttcatct

30901 ttttggaat tatctttacc ttcttttaat tctaaaaatt tagcattagc cgtatTTTTA  
30961 agctgcgcta aagcataatc tttggcaaca tccttttttag cgccttcaaa actcatgatt  
31021 tttccgctaa aatctttata tttaaattta ttattttcat tattataaaa ttcttctagc  
31081 ttgctatcat cgatTTTTTg catatccact ggtagataat aagtggaaat ctcatatatt  
31141 ttttttgttt tataatcttc tttgtgttca ttccaaagtt ttttaagctc ttcttcatta  
31201 acttgatat tttctttatc ttgctctagt tttgctatat ttaaagaatc ttgcataaaa  
31261 tagctagctc ctagcatttt caactcttca tctgtttgag gaagattaaa tatttgctct  
31321 agtttaccga taataatttc atttgaaaga gttttttcat attcttttgg agtcatattg  
31381 tttgcattta aaagttcgta gtaaattggt ttattgaaat cgcctgaagg atcttgaaag  
31441 gctctagttt cagcaagtgc ttgaataact tcattttcgc ttgaacctaa tcccaaatct  
31501 ttagcaaaat ttaacaaaag tttatcttca actaaagagc ttaatgcggc attttcgatt  
31561 cctaattgct tagcgccttc ttcatTTTaa ccaccattgc taatttgggt gtaataatta  
31621 aaaatctgat tatactttac attaaattca ttataattga ttttttcatc tccaactaca  
31681 gcaacactcg aacttctatt aagattaaaa tcataagcac cccaacctaa aaaccggtct  
31741 ccaacaaaag ctatgggtgct aatccatata gtaataacaa gatatTTTTT gtgatgttgc  
31801 atccaagtaa gcatatcatt ccttgataaa aattaaacta catatTTTTat cgcagaagtg  
31861 ttttaattaga gtttaattag tagttttttg ttaaattttt tcattttgat tttagttaaa  
31921 atttcgttat aattatagct tataaaaaatt ttataggata taggatttga aaattccaca  
31981 cattcccggt ttactcaatg aagtaaacta agcatttaaa aaactagact cgggggtattt  
32041 ttttagattgt actgtgggtt ttgggtgtca tagcgaatcc ttacttaaaa atcatccaaa  
32101 ccttaaactt atagcatgcg atcaagataa agaagcgctt gaatTTTcaa aaaagcgtct  
32161 tcatgatttt caagatagaa cagaatttgt tctgagtaat tttagtcaaa ttttagacca  
32221 aatttcacac gataaactga acgatctcaa aggcatttta gctgatattg gagtatcttc  
32281 ttatcaactt gatgataata aacgcggatt taatcttcat tctgattttt tagatatgag  
32341 aatgaatcaa gatgctaaaa attcagcttt tgatattatt aataattata cccaagagca  
32401 attgagtgat atTTTTTaaa aatatggaga attaaataat ggatacttta tcgctcaaaa  
32461 aatttgtcaa gaaagacaaa aaaataaaat aaaaagcgtc aaagaacttt atgaaatcat  
32521 aggaaaaaca aaacaaaatc atagaaaaat ttctaaagca actctagttt tccaagctat  
32581 cagaatagaa gtcaatcagg aacttgaagt tttaaaaact ttttttagaaa aattagaaaa  
32641 aattaaatta aaaaattgta tcctagctat tatttgtttt cattctttag aagataggat  
32701 agtaaaaaac tatttttaaaa aatgggctaa aaattgcatc tgtgatgaaa gagcctttta  
32761 atgtgaatgt ggaaataatc atgcttttagg acaaaattata agtaaaaaag ccatagttcc  
32821 aagcaaagag gaaattatga ttaactctcg ttcaagctgt gcaaaaatgc ggatatttca  
32881 ttttaaaaat atggataaat aatgctagat gatgatttct taaaagaaaa acaaaatata  
32941 cgccaaaaaa tgcttaaatt ttctcgtgcc gtcaatcaag gtaaactttt ggatgatgat  
33001 ttaaaagaag aaatctctag tgatgatatt ttaagacgcc gcttttaaaaa acgttcaaat  
33061 cgtttcttag atgaagtaga agaagagtat gagttagaat atacaaaaaa atcaaatata  
33121 tatttaaaaag aagacttgat aaatgtttaa ttagaagaaa aacaatcttt ggctaaaaaa  
33181 attttttcca aaataaaaga aaaaaataaa aaccaagaac caaaaaataa aaaaacaaaa  
33241 aaactttttt cttttctgaa gaaaaagaa attcaaacta tacaaaaata aactacgcac  
33301 aataacactc aagaaaaata tttgcacaca gacaagcaaa cagaaattaa aaaattacaa  
33361 aatgataaga tccaaccac acaaactgac ttaaaacctg atataagaca aagcctagaa  
33421 aatttcaaaa aaaaaataca aacacaagaa ataaaagcag agattgaaaa acccgaaatt  
33481 cagcccatta aaacagaata cgatgaagat gcgcaaaagg ttaaaaatgt attactagaa  
33541 ggatttagca atgctactaa agaagataaa aatctcaatt tcaatcattt gctttttgct  
33601 gtattatttg tcagttttac tcttgtttta tttgcaccac aaatttata aagaaatcaa  
33661 atttactatc ttagtcgaga aattgctact ttaagagtag aagaaagtgt acttgatgaa  
33721 gaaaataaag atttaaaaag acgcttggaa atcatgcgct ttcaaaatca aattttagat  
33781 tatttagaat gaatgatttt ttctaaaaca tattgttcta aatttgcttt tggaaatttct  
33841 tcctttaagg cttctttata aaaattgcc aaccataatag aatatttttc atacgcaaaa  
33901 taaggaaaaat gcaagccca cgctttttgt attaatTTTT ttgaaatcat tttgcgagca  
33961 taaaccttaa aaatatcgta agaaataaaa acacatgcgg taacagctac ggcactgatt  
34021 atactgatat gaaaatcaag acgagtaaaa agataatgcg taatgagtaa taatggtaat  
34081 aaaatcaag cgcagaaaat tccaaaatat atataagaat ttaaaatTTT aaaattaaaa



34141 ttaagtttgg aaggatccac aagcattcca tcattaaata aagcattagc ttcaagtaaa  
34201 tcgcgcaaga gaacaggctg gtcggatata ttaaaaagaa aattacaact aaaatcttta  
34261 aatTTTTTca tTTTTTTac actTTTTaaat tTTtagTTta aaatactatc taaagaaaat  
34321 taaatTTTggg tTaaaacaaa agctTTTtagc tTTTgTTtat caactcttct gtgattctag  
34381 caatctcaag ttcttcatct gtaggaatga taaaaatctt tacttttagaa ttagcggTgc  
34441 taatcattct tTcacagctt gatTTTTcat tattTaatcc tatatcaagt tcaacaccaa  
34501 gatgagataa tctttcacia actTTTTggc gaaccgaagc ggcattttca cctataccac  
34561 ctgtaaataa aatagcatcc gttctaggta aaaccgtaaa ataagccctc atatatttta  
34621 aaaggcggta acaaaacata tcaaaagcca aacgcgctct atcatcacc tgctctatTT  
34681 tcgttcttat atctctaaaa tcattagaac cgcaaattcc ataaagcccg cTTTTTTtat  
34741 taagcaaagt gtcgatttcc tctattgtta agcccttaag attactaata aatggTaaaa  
34801 ttgctggatc taaatcacca cagcgagttc ccataacaag accttcaaga ggagTaaaac  
34861 ccatagaagt atctatactt ttacctcctt caatagcaca aacacttgca ccatTTccaa  
34921 gatgtgctga aattgcattt aaatcttctt tgtcttttcc aagcaattta gcagctctag  
34981 cacttcaaaa agcatgagaa gtaccatgaa aaccatatct tcttatattg tgcttatcat  
35041 aaaaatcata aggtaaagca tacatataag caaaatcagg catagtacga tGaaatgctg  
35101 tatcaaaaat cactgtatTT tTaaacattag gcgcagctTT catcatcgTT tTaatgcccg  
35161 cTaaatgcgc aggattatgc aaaggcgcaa aaatactaac tctatcaatt tctTTtaata  
35221 cataatcatc aaccaaaaa tgctcgctta aatttcttcc cccatgcact atacgatgac  
35281 cacagccatc tagcgcattt aaatcttcta aaattccaga ttctTTaaaa agctcattga  
35341 caatttgtaa accatgttcc tgattTTTTta taggaagtTc tctTTcaaat tTTTcatcgt  
35401 tTaaagcatt tTTtagtata actTTTTgatt tTtcttctcc aattTTTTcc accaaaccac  
35461 tagctTTaac cacTTtatca tcaaaaaatt taaattTaat agacgaggag cctgaattta  
35521 aaactaaaa cttcattttat tTtcttctct tactgtgctt gtatggcact taaaataact  
35581 gtatccacta tatcatcaac caagcatccg cgactTaaat catttacagg tTTTTtaagt  
35641 cttgcaaaa taggaccgat tgctaaagca tTtgcTgttc tTtgtacagc cttatagcaa  
35701 atgTTTgcgg catcaagatc aggaaaaaca tatacattta cattgcccgc tatcttagaa  
35761 tTtggcattt tTttagcagc agtTTtaggg tcataagcac aatcaaattg cataggacca  
35821 tcaatattta attctggata tTtTtctTg gcaattTtca aagcttcttT aacaagatct  
35881 acgctctcgc cTtTgcccgt gtctccgcta gaataagaaa gcaaggctat cttTggtca  
35941 atacaaaag acttcgcagt catggcactc acataagcac tggTTgcaag ttgttcagca  
36001 tTtggattTg gatTTacagc gcagTctgca aaagctaaga cTttatcatc aagcccata  
36061 aagaaaattc ccgaaacaga atcaacacc tctTgagttt taataatctg aagtgcagga  
36121 cgaatagttt cagctgtagt tgtagatgct ccactTacca tagcatcagc tTtTccactg  
36181 tgtattaaca aggttccaaa ataagtccta tctTTtaacta attctTtagc ctctTcaagg  
36241 ctcatccct tagattTtct tgcttcatat aacaaagtag caaattcttC attgtattct  
36301 gaattaagcg gattgagtat tTtTactgcg gTtaaTcaa gcgctaattc atcagctTtT  
36361 tgtTtgatat cTtgcTcatc acccaacaaa ataagatcaa ccacactgct tTtTaaacaaa  
36421 attTcaactg cTtTtTaaat tctTtcatca ttactTtctg gcaaaacaac agTtTtTtTta  
36481 tTtTtaacac tTtTtTtaat gagTtcatat tTaaaacgat gtggagTcat aaaatcataa  
36541 gctTgcaact tatgcacttc tTcaaaatta aaattTtcat taatcaaggc gTaatctTtTg  
36601 ccatctaaag cTtcatcaaa atactTtTtga gctattaact tatctTcatc attgataata  
36661 gccgctatag gagTgtTaaG attTtTcgcC aattTtTatgc ttagatcaaa accatcaagt  
36721 attccaaatt cacaaaaact attTaaacaga acaaaatcat attTtacgatt taattctTca  
36781 tattcttcta agatggTatt gaaaaaacta tgcggatctt tgctaaattc tTccatagct  
36841 tctctaaaag taaaactata agcattTtTtT aatgTtTgct tgatatcaaa tTcctcaagc  
36901 catcctTgca aaacaggaat acgatgtaca taaatcacag gacaataaat agctatattT  
36961 ttatatatct tgctatagtt tTtcaataat tTcgtggTga tTaatgtatt taactcatca  
37021 ctcttagatc tcatcaataa aagattTgC attattTtct cttTggtTtT aaaaagtTga  
37081 aactctTtTg cTtTatactt actTgaaaaa ctattTtTaac aaataaaaaat gaaattTcat  
37141 cattTaaagg acgaaaatga aaaaagTtTt attctatgtg ttacctTtTg cattTtTtTgg  
37201 atgttctgca acagtagatc cacaaattTc tatgaagccg cctgcttatg tagaagagct  
37261 tgcacctaaa caaagcaaca atgtagaaac tgcaccgga tcactTtTtTg gaaaaggaga  
37321 taatcctTtTta ttctctgata aaaaggcgat gaatgTaaat gattTtagTta ctgtggttat

37381 ccaagaaagc accactcaaa gcactcaagc caataaggcc acaagcagaa ccaatacttc  
37441 caatttagga ggaggagctt taacaggtgg aagtggcttg cttggaactg caattgataa  
37501 agtaaagct tattctaata taggctttca aaccaatagt actaataact accaaggaac  
37561 aggtgctcaa agtcgtaatg aaagttttaa tactacaatt tcaacacgcg tgattaaaat  
37621 tttatctaata ggcaattatt ttatcgaagg ttcaagagag cttttgatta atggagaaaa  
37681 acaaatcata caacttagcg gtgtgattcg tccttatgat atcggccaag ataatactat  
37741 agatagtaga tatatagcag atgcaaaaat tctttacaaa actgaaggtg aagtggatag  
37801 aagtactaga aaaccttggg gaagcaaagt catagaagct atatggcctt tttaaataaa  
37861 cttaaaattt aagtccttaa aattaggact taaattttat tgcgatttta ttttaaacat  
37921 ctatacttaa aataaaatct attcttttat ctctctactc ttaacctcat cttctacttc  
37981 agctaaaaat ctatccacaa gttcattttc tttgagtttt gctacaactt ctccatgtct  
38041 tataacaagt ctttgatttt ttccaaaagc tatagctaca tcagcaccct tagcctcgcc  
38101 taaagcatta acaacacagc ccataacact gatatttaga ggctctttga tatgttttagt  
38161 tttttcttct acgattttta tagcgctaata taaatcactt tgaattcttc cacaagttgg  
38221 acatgagatg atatttactc cacttttttg cactccgcta tcttgcaaaa ttgctcttgc  
38281 gactttgatt tcttcttcga gctcaccggt cattgaaact ctcatagtat cacctatacc  
38341 ttttaagaagc aaattgccc aagcaataga actttttatc gtgctgtgaa atttagtccc  
38401 tgcttctgtt actcctaaat gaaaaggata atcacaagc ggtcttaatc tttcataagc  
38461 ttctatggtc ttttgagtat cagaagtttt catcgaaatt tttatatcaa aaaaatccaa  
38521 atcctctaaa agcttaatat tatacaatgc actttctagc attgctgcta cgccatatcc  
38581 atatttatcg ctgaattctt tttctatgga gccatgattg acacctatac gtataggaat  
38641 acctcgctcc ttacaagctt ttaccacttc tttaatattt tcttttgagc ctatattgcc  
38701 tggatttata cgaactccat caataaattc agcacaaaat acagctaaat tgtgattaaa  
38761 atgtatatct acaatcaaag gcaaaggact ttttgcctta atctctttca aagctcttgc  
38821 atccgccata tccaaacatg ccaaacgcac gatattagct cctgcaaaaat aaagccgatt  
38881 aagttgctct aaagaacctt caatatctct tgttttagta aagagcatag attgcaccga  
38941 aataggcgca tctccaccta ttaaaacatc acccacttta atttgtcttg tcttaaatct  
39001 tttatattcc attttcagct tctttttgta aataattttt aaaattttag ctattttttg  
39061 cttaattcc tcataaaaaa tcaataggat ctatatctac gtaacattt ttaaaattta  
39121 aagcatattc ttgtatttta attaaagctt tataaaaaatc gctacgaagt aatatataaa  
39181 aacgatattg cccttttaac atttctatgc tacaagctcc atatctata atttcaactt  
39241 ttaaaatgtg actgatttga tcaactaatt ttttacacaa attttgagcc tgcttttgct  
39301 ctttatcttc gatcacaatt ctcaaaagac gcttaaaagg aggataaaga tcttttctgt  
39361 tttctaattc atcttgcaaa aagctatcat aatcctctat atatcgttca aaaaaattcc  
39421 tttttttgt ttgtaaaagc acccttcctt cgcctttacg ccctgctctt cctgctactt  
39481 gcatagccaa agctaaagtt tcttcacttg ctttaaaatt agggcgaaac aaatactcat  
39541 caagtcctaa aataacgctt aaatctacac tatgataatc atgtccttta gcaagcatag  
39601 aagttcctat aagtatatca atattatttt cgttaaaatc tttcaaaatg gcattgagtt  
39661 ttcgaatgct tgtaatctca tcgctgtcaa atttagctat ccttgccaaa ggtaaagctt  
39721 cttgcaaaag ttcttgtaat tctgctgtac ccatcttctt agcctctagc attgcacctt  
39781 gacaactagg acaattttgc tctatcaaag aagtataatt acaataatga cactttaaaa  
39841 ctttctttt tttatgtaaa ctcatagcaa tagaacaaaa aggacatttt atggtttgcc  
39901 cacaatcttt gcaacaatt tgcctaaaat tagccttcgt gggtaaaaaa atgatagctt  
39961 gcttttgatt ttccaaactt tttttcaact cacctaaaag cataggggtt ataccagtt  
40021 cgctttcatc gtataaaaaa tgtttcttac tttcaaaaaa agtaccctta agcctgaaac  
40081 tcttttgctt gtaaaaaact gttaaagaag gagtagcaga gcctaaaagc actttgatat  
40141 caaattttga actcaaaaaa agcgctaaat ccctagcatt aatatagggt tgattggacg  
40201 ctttgtaaga attatcatgt tcttcatcca ctatgacaag tgctaaattt acaaaaaggta  
40261 aaaataaagc cgatcttgct cctgcaacca aaagcgcttc acccttgcaa aaacgctcta  
40321 aattttcttg cttttttttc tttgaaattt tagaatgcca tagaaaaaat ttatctttta  
40381 aatatacctc taaacgcttt tgcatctgtg gagtaagaga aatttctggc attaaaagca  
40441 aaacttgttt tccttgttct aaatattgct ttattaaaca aatataaatt tcagttttcc  
40501 cactacctgt atctgcaaaa agcaaagaag tgggattagt ttttacaat tctaaagctt  
40561 cttttgctt ttggcttaat ttgggttcat tttctatttt aaccggatca caagcatagg

40621 tttgatgagt agaaaaaagt cctaatacaa agcctagttt tgaagtataa taatacgaaa  
40681 taaatctcgc caattcaaat tgcacacagc ttaacgaaaa aggtgtaatt tctttaatct  
40741 cttttgtttg aaattcaggc ttttggcatt cttttaatac taaagctcta agatTTTTTT  
40801 tattttttta atcaataata acctccctta aagccggaat ttcttcctcg ctatgaaaga  
40861 ttaaattttg caaataaagt ccaaaaactg ctaattcata atatctcata ataattcttt  
40921 acaatatttt tcgctaagac attctaaaa agcaaaatca gcattataaa aaaaatcaac  
40981 ccattctttt gcatttaaaa aaaatctata tcgattaggt gctattttca tccaagcatt  
41041 taaattagag taaataggcg tatggagtaa agaataagt caatTTTgac cagcttgaca  
41101 ataaaaaac ttttcttttt gagtattgat ttttgcttca tcaagattag gagaaaaagc  
41161 actgatttgt ttgagttcaa cttgggtacg cataagagct aaggctgaat ttagcatttc  
41221 ataacttatt ttcaatttta ataatttcgc attattttta ttttgattgg caaaagagaa  
41281 gcttaaactt gccaatatcc ctaaaatcaa tatcacaana ataagctcta aaagagtaaa  
41341 agcctttttc attttacagg gagttcttca ttgatcgctt ttataagttt ttttaagttct  
41401 ctttctaaga tataattctc atagcttttt tttaaaaaag catcgacgaa acgctttaat  
41461 tctatctttt tagtgccacc agaaataaga gcgatcatcat cttcaaaaa attcgcaaat  
41521 tctccactgc atttaacaat gaaatccttt gcagaaacat tgataataac ttgttttaaa  
41581 ttatcacttg ccaagtacag cctctatttt tttgaaaata tcttcacttt ctatattgag  
41641 agacttaagc tcttcttcta aacgcatgat ttgattgctc tttgcttcat tttgagcttt  
41701 tacgcttaca agttcgtttc ttaaattttc atttgcttcg cacacttcat tgtatttttc  
41761 aatcaactca ttgactttat ctgacattgt gttaataatt ttttcatcga acatagggtt  
41821 gccttctgtt atagaaatth aaaataaaaa ttttttttg taattgtagc agaaaaaat  
41881 ttaaatttag gttttttata gtcaattaat ttttaattaa agcattttct tttaaaatt  
41941 ttctaaaaaa ctttcaaaaa gtaggaaaat gttagaactt acaagtgatt ttaaaccaag  
42001 tcctgatcaa aaacaagcaa tacaaggcat agtaaaaagt ataaaaaag gtaataaata  
42061 tcaaactta ctggcgtaa caggaagtgg aaaaacttt accatggcaa atgtcataaa  
42121 agaactcaat atgccaaact ttatcatgag ccacaataaa agcctttgtg cacaacttta  
42181 cagcgaattt aaaggatttt tttctaaca tcatgtggaa tattttattt cttattatga  
42241 ttattatcag cctgaagctt atataccacg taccgatgtt tttatagaaa aagacagctc  
42301 tacaatgaa gatctagagc gtttaagact tagtgcaacc gcttcgcttt taagttacga  
42361 agatgtgggt tgcatcgcta gtgtttcagc taattatggg ttgggaaatc caaatgaata  
42421 cattggaatg gtattgattt ttgaactggg catgcaaatt tcacaaaaag aacttttgaa  
42481 aaaacttgta gatatgggct ataaaagaaa tgataatttc tttgatcgtg cagattttcg  
42541 cgtacaaggt gatattatag atatttatcc tgcttattat gaagatgaag tagtaaggct  
42601 tgaatTTTTT ggtgatgaac tggatgcaat gtatcattat aatgttttag aaaacaaaa  
42661 aggcaaagat ttaaaacgct ttatacttta tcctacaagc caatttagcg taggagaaac  
42721 tagactaaag caagctatta aagatataaa gatagaactt aatgagcgtt tggcgcaatt  
42781 tgaacatgaa aacaagcttg tagaatacca acgccttaaa caacgcgttg aatttgatct  
42841 tgaatgctt acaagtacag gaatgtgcaa aggggttgaa aactatgcta gacatttaac  
42901 aggattaaaa gaaggagata caccttatac actttttgat tattttgcta taaaaatag  
42961 aaaatttctt gttattgtag atgaaagtca tgtttctttg ccacaatttc gcggtatgtt  
43021 tgcaggagat agaagcagga aacaaacttt agtagattat ggttttcgtc ttccatcagc  
43081 tcttgataat cgccctttta tgtttgatga atttatccat aaagattgtc agtttctttt  
43141 tgtttcagct acccctgccc cacttgagct tgaacttagt aaagaaaata tctttcatca  
43201 aatcatgctg ccaacgggac tacttgatcc tttgatagaa cttaaagata gcgataatca  
43261 agttgaaatt ttatttgatg aagccaaaa agttatacaa agaaatgaac gcgttttggt  
43321 tactgtgctg actaaaaaac tagctgaaga acttacaaga tattatttag aacttggcat  
43381 taaagtaaaa tacatgcatt cagatattga tgcaatagag cgcaatgaaa tcataagagg  
43441 cttaagaagt ggtgcttttg atatgttaat aggcataaat ttgcttagag aaggacttga  
43501 tttgcctgag gtttcgctta ttgccattat ggatgcggat aaggaagggt ttttaagaag  
43561 cactacaagt ttaattcaaa ccatgggaag agccgctaga aatgtcaatg gtaaggtttt  
43621 actcttttgt aaaaagatta caaatctat gcaagaagct atggatacca caaatgagcg  
43681 tcgcaaactt caagaagctt ataatacaaa acataatatt actccaactt cagtcaagcg  
43741 acatattgaa gaaagtttaa aaaatgaaga gaatttagga gaaatttatc gcaaaggtaa  
43801 aaaatttgaa aaaatgcctg ctaatgaaag agctaaaatc ataaaaaac ttcgtaaaac

43861 aatgcttgaa gctgctaaag cactcgaatt tgaaaaagca gcggccttta gagatgagat  
43921 caataaatta aaagatttat aatattttta ttttgcagga aaaatcctgc aaaatattaa  
43981 agatatactg ctattaaagc taagaaatat cccgcaacac aagaactaat cacacctata  
44041 agacctggta aaataaaact atgattgata acaaatgtgc ctatatgagt tgtacctgat  
44101 ctatcaaatt gcatagtagc taagtgcgct ggataagttg gtaaaatata atacccatag  
44161 caagctgctg caaaagccac gataatacct ggctcgacac ctattcctaa ggctaaagga  
44221 acaaaagccg caatagctgc tgcttgagag tttacaaatt ttgaaataag taaaagcatg  
44281 attgcataag tccaaggata atctgtaacc acatcttcaa gagctttttt catcatagga  
44341 gtatgaacag caaacatagt atcagccatc caagaaattc caaaaactgc aacaagagct  
44401 atcataccag atttaaaaat ctcatgtgaa ccgatttttt tcgcatctgt tttagtaaag  
44461 ataataatca aagctccagc taaaagcata aacatttgta ttacatttac catagagatg  
44521 aaatcataac taggattgcc taatttatct ttttgaggga ttgcaataat ctgcctgaa  
44581 tttatcgctt ctttaaatth gctactctta tctccatttt ctttactat tgaagtttga  
44641 tcaaaccta attgcttaag atctacaaca cttttattta atccacttgg agtccattgt  
44701 aatgtagtgc cattaatctc cgctttataa gccatttttt gacccaatt tggtttaaga  
44761 gaatcaaatg caccaattaa ggcaaccaat gcaatagctc ctaagaaaat ccacattgca  
44821 atccaattgc tttttggaag ctgaacacct aaaagtgttt tagaatcgcc ataaacatat  
44881 tttttaaatt caggatcttt aagtttttct tgaaaaactt catctttatc caaatccttt  
44941 cccctaaacc aagaaaaaat tcccacacat aaacaccaa aaagcgtact aggtatagta  
45001 atttgaagaa gattgatata gccatcaaaa cctgctaatt tatgctctgc atttaaaagc  
45061 aaagctgta agcttacaac tgcaacagaa acaggacttg caataatacc catttgcgaa  
45121 gatatagaag ctgctgccat aggacgctct ggacgaattc ctttttaat cgctatgtca  
45181 taaataatag gcatgatagt ataaaccaca tgtcctgtcc cacaaagtat ggttaaaaag  
45241 caagttaca aaggagctaa aatggttaag aatttaggat tgcgtcttaa aactctttca  
45301 gctatttgaa gcatcacatc aagaccgcca cttgcttgta aagtcgact tgcaacaacc  
45361 acagctaaga tagtaagcat tacatctata gcaggctttc caggctttat atgaaaagca  
45421 aaaacaagca ttaaaatacc tatacctcca agtaagccaa gggctatacc accttttttc  
45481 gcaccgtaaa aaagacaaat taaaacaatg atgatttgta ttaaaaactg aatactctca  
45541 tctagactgg ttaaaaagtc ctttttaact ctttttatgg aataaattta aaaattgttg  
45601 tgattatagc acaattttta ataaaaaac atataattaa aataatatac taatgaatat  
45661 taaaatatac attaaaatat cattaataca aattcagtgt atttttatat ttttgatttc  
45721 aagattaaaa aagtgataaa ttgagtatta tccttcaagt tcgtataatt tttttctatc  
45781 tgttgaaact ggtatattta agtgtttacg atatttagta atagtcgctc gtcctatatac  
45841 gactttaaat tcttttttga tcaattctag aattttacta tcgcttaaag gttttaaacg  
45901 attttcattt ttaactaaat ttgcgacaaa gtccttaaca ccgacatttg aagtctcgcc  
45961 ctcttcatca agcgcaaaag caaaaaaatc acgcaaaggg ataagtccc tatcacaact  
46021 taagtattta tttgccactg cccttgaat ggttgaagca ttacgctcta aatcaagagc  
46081 tagatcttta aaagtcatag gtttaatatc tttaccatg aaaaaatcat attgatattc  
46141 tactatcata agtcctattt tataaagcgt tgcttttctc atcgttaaag catcgactaa  
46201 attttttgct tcttttatgt agtgatttaa atattcatga tttaaacat cagtctcaat  
46261 agaaatttca ggataataat catcattgat ttttacctg atttcattat tttccctata  
46321 acaaaagata tcaggtataa taacgcgaga atcttcaaaa tactcaaaa aaggcggat  
46381 actaaaacgc ttaaaaatcg ttaatgcttc tttatacaag gactctttag tataattttg  
46441 tatattttca aaatcttgaa taagcatttt acaaaaatca taaagctctg catcaagttc  
46501 tatattttct aatgcaaata aaaatgcttc tttataatct tttgccccca ctcccacagg  
46561 atcaagaaat ttaaatcttg ctcttatgct ctctatttca tttatatcat aatcttttaa  
46621 aatttcttca tcgtattcaa aatatccctc atgatttaag cattctatga ttttacctgc  
46681 aagttcttgg gatttatttg taggaaaaag aggaggtata atctgctcgc ttaaaaagttc  
46741 atatacactt tttgtggcaa aacctttatt gtccacaaat gctgaattta cattgcgttt  
46801 ataaaaagaa tcaaaataat tcttattatg ctcttgggtt tgaatgggtt cttgaacact  
46861 caaaaaagga ttttcctcgg caaatthtct taaattttct tttaaatctt ctatatttgc  
46921 ttgtaataata ggcaacctg aacgcagagt ttgagaaatc ttggtttttag gagcttgggt  
46981 aatcttttgc cttaacatca atcaaggagt ttaaacctcg ctctaaata gtatttttta  
47041 acatctttat tatttgctat ttcttcagca tttccgcttg cgagcaaaga gcctgatctt

47101 atcacataag ctctatcaca aattgccaaa gtttcacgaa cattatgatc ggtaattaaa  
47161 attccaatat caagctttttt aagctcattg ataagacttt gaatttcagc taccgcgata  
47221 ggatccactc cagcaaaaagg ctcatcaaga agcaaaaatt taggctcaca catcaaagat  
47281 cttgcgattt cacaccgcct tctttccccg cactttaagc tcaaaccttt tcttaaacga  
47341 ataggttcta tacttaaaag ttcgagcatt tgctccactt tttcatgtaa aatthttcta  
47401 tctttataaa aaatthgagc agctaaaagc aaattatctt caacgcttaa atccttaaaa  
47461 atgctgcttt cttgaggtaa gtaacctatg cccagccttg ctcgthttatt taaaggctct  
47521 ttagtaatat ccaaaccatc taaaagcact tttccgctac ttggagctat aagtccacat  
47581 atcatataaa atgtagttgt ttttccggct ccattaggtc ctaaaagtc aacaacttca  
47641 ccactatthta gttctaagga tataccttgg ataactthtg thttthttat aatthtttct  
47701 aaatthtaca thttctaattt actcatgaat tacatactth cthttthattat cthtttact  
47761 aatthtttatt tccaaggtag gaattccaag thtttagcaaa gctthttthta aatthttctc  
47821 tccccattca accaaatgca agccctcttc aaaaaaattc tcaaacaac cattthttta  
47881 aagctcttcc aaaccctctt gatataatc ataatgataa acacataat cthgatttht  
47941 atatthttg atgatagaaa aggtgggaga atctacttht tcatctaaat thaaaaagct  
48001 caccaagct tgcactaggc ttgtthttacc gctggctaath tctctthgca ataaaaaac  
48061 acctgthttt ggtaaagtht ggagcattgt thtttaattc tctthggcta aaacaattc  
48121 thttcataath taccacata ctgctthtg gctthttthg gaatthttt ggtagtaggt  
48181 aaagcaaaa cthtatattc ttgctataa tcagtaaaat gcaaagcgaat aatctctct  
48241 actthaacct cthtgctcgc thttactatc actccattaa tccccactac accacttcta  
48301 cacatactc cagaaatagc thttctthta gtaatthta cgcattthaa aaatthattc  
48361 actctcatag tacagaattt taccaaaaaa atthaaattt thaaacctat thttatccaa  
48421 ctagcttht thcatcaatt thaaaaactt thtttaatga atthttggata caatthaa  
48481 atthaaatca thattaacaaa ggatactcta tgaaaaatga agthaaaaaa gctgthttgg  
48541 catatthctg cggactthgat acaagthata thttthaaat gctthcaagat gaatacaaat  
48601 gcgaagtagt aactthttaca gcagatattg gacaaggtga agagctthgaa cctgctagaa  
48661 aaaaagctct thcattggga atthaaagaag aaaaatgthtt cattaaagat thaaagagaag  
48721 aatthgtthaa agattatgta thttctatgt thtagagcaa taccatttht gaaggtgaat  
48781 acctactthg aactagcata gcaagactth tgattgcaaa aactcaagca caaattgctc  
48841 tacaacagg tgctgatcgc gtaagctatg gagctacagg thaaaggaaat gatcaagthc  
48901 gthttgath aggctatcta gctththaat ctgattthaa aatcatcgtc cthttggctg  
48961 aatgggath aaacagccgt gaaaaactct tagctthatgc acaaaaacat ggcattgata  
49021 thttctaagaa aaaaggaaaa thccctthatt ctatggatgc aaatthactt catatthctt  
49081 acgagggact tgthtttagaa gatcctgctc acgctctga agaggatath tggagatgga  
49141 gcaaaagthc aaaagaagc ccaaatgaaa gcaaaattat agaactthgat thtcaaaagg  
49201 gagatthagt tgcgatcaat ggagagcatt thagctctgc tgggctthta agcaaactht  
49261 acgagctthg tgcaaaacat ggcataggac gcctthgatath agtagaaaat cgtatgthg  
49321 gaatgaaaag thgtggctgc thtgaaacac caggaggaac thatacttht aaagcacacc  
49381 gthgctatthg aagthattaca ctgatagag aagctgctca thttthaaat gaactthatgc  
49441 caaaatathc gagthttgath thaatggct atthgthctc acctgaaaga atgatgctc  
49501 aagctctaat cgatgaatct caaaacatg ccaatgthtag agthaaactt gaactthtata  
49561 aaggcaatgt aatgthttata ggccgagaaa gctgctaatga tagctthatt aatgcagctt  
49621 atthcacctt thgaagaagat gaagthatac atcaaaaaga cgcagcaggt thttatcaaac  
49681 thgaatgctth gcgthtttht atcgcgggaa aaaacggaag aaatthttta acaaggatta  
49741 aaaaatgaaa gthattthaa thcaaagatgt thaaagctct ggaaaagcag gthaaatcaa  
49801 agaagthaaa gatgthttat gthcaaaatt thctattgct aaaggctthg cthaaagcagc  
49861 acaaatgag gthttthaa aatacgaag cgacaagaaa aaagaagcgg agaatthtacg  
49921 cthttgagct gcaaacctth aaaaactthaa agaagagctt agthaaagtht cgtthgaaat  
49981 thcaaagcct thtaggagcta atggaagtht atthggcggg gthactthaa atgaaatthc  
50041 ccatgcttht aaagagcaaa cccatathaga aatcgataaa aaagctthg agthgcgatac  
50101 cthaaaaagc cthggcactc atgaagthcag cgtthaaatth ggtcatgcta thcatgcaaa  
50161 atthtaatata aacataaagg ctgaataatg thttcatgcaa caactattht agctthacaaa  
50221 ggcaaaaaca aatccgthaat cggcggagat ggtcaagtht gctthggcaa thctgthttta  
50281 aaagthaat cagthaaaat aagaaaactc aataatggca aagthtttagc aggtthttgca

50341 ggatcaacag ccgatgcttt taatcttttt gatatgtttg aaaatctact tcaaagctct  
50401 aagggtgatc ttttaaaagc agcaattgat ttttctaaag aatggcgaaa ggataaatat  
50461 ctaagaaaac tcgaagctat gatgctagta cttgatagaa atcatatntt cttactttcg  
50521 ggacacaggcg atgtagtcga gcctgaagat ggacaaatcg ctgccatagg aagtgggtgga  
50581 aattacgcmc tttcagcagc tagagctttg gcaaaacatg caaatrtaga tgaagaagaa  
50641 ctagttaaait caagccttca aatcgcgggt gaaatrtgca tttataccaa tacciaatata  
50701 aaaacttatg taattgagga tgaaaaatga atttaactcc taaagaaatc gttaaatrtt  
50761 tagatgatta tgtcatagga caaaaaaag ctaaaaaat tatagcaata gctctaagaa  
50821 accgctatcg tagaatgcaa ctcagccctg aactccaaga tgatatagtg ccaaaaaata  
50881 tccttatgat aggatcaaca ggtgtgggca aaactgaaat tgcaaggcgt ttggctaaga  
50941 tgatgggctt tccttttatc aaaatcgaag cgagtaaata cacagaagta ggctttgtag  
51001 gtcgcatgt agaaagtatg gtaagagatc ttgcaaatgc agctttaaat ttggtaaaaa  
51061 atgaacaaag agaaaaaat aaagataaaa tcgatgaatt tatagaaaat aaaatrttag  
51121 aaaaacttct tccccctttg cctaaaggta tcagtgatga aaaacaagaa gagtataaaa  
51181 atagccttga aaaaatgaga acaaaactta gaaatgggga tttagatgaa agcgtgatag  
51241 agatagaaat ttcgcaaagc atgtttgata ccaatccaaa tttgccgcct gaaatgggag  
51301 caatgcaaga tatagtcaa gttataggcg ttggcagcaa aaaagtcaaa aaagaaatga  
51361 aaattaaaga tgccaaaaat gctcttaaaa atgaagctgg agagaaaatt ttagatcaag  
51421 aaagtatcaa aagcgaagct ttaaaaagag cagaaaatga aggaattatt tttatagatg  
51481 agattgataa aattgcagtt tcaagtggaa attcaaatcg tcaagatcca agcaaagagg  
51541 gtgtgcaaag agatrtgctt cctattgttg aaggctcgag cgtgcaaca aaaatcggca  
51601 ctttaaaaac cgatcatatc ctttttatag cagcaggagc tttccatctt agcaaaccaa  
51661 gcgatttaat ccctgaactt caaggtcgtt tccctttaag ggtggagcta gatagtcttg  
51721 atgataaagc actttatgaa attttaacac gccctaaaaa ttcactttta aaacaatagc  
51781 aacaactttt aaaaactgaa aatrtagaac ttgaatrtga tgacgaggcg atcaaagaga  
51841 ttgcaaaaat tgcctctaag gccaatgaag aaatgcaaga tataggcgct agacgcttgc  
51901 atacggttat agaaaaatta cttgaagatc tcagctttga agcagatgaa tatgchggtta  
51961 aaaaattcgt agttgataaa aaaatggtag aagaaaaact cggagatatt atagaaaata  
52021 aagatcttgc aaggtatatt ttgtgaaaag tggctttgtt agcatcatag ggcgcaccaa  
52081 tgcaggaaaa agcactctta ttaattcctt actagaagaa aaaatcggcc tagtttctca  
52141 caaacaaaac gctacaaggc gtaaaattaa agctatagtc atgaacggtg aagatcagat  
52201 catctttata gatacacctg gtcttcatga aagcaaagca acgcttaatc aatrtcttat  
52261 ccaaagtgcct ataaaaatcta tgggtgattg cgatgttatc ttgtttgttg ctagtatrtt  
52321 tgacagtgta aaagattatg aaaatrtcct aagcttaaat cctaaagttc ctcatatcat  
52381 cgttcttaac aaagtagatc tagctgataa tggcgcactt ttaaaaaaac tcaacgaata  
52441 tgcaaaattc agtgagtatt ttaaggctat cttgccttat tcttgcaaga aaaagagtta  
52501 tcaaaaacca ctgctaaatg agctatgtaa gctcttgctt gaacatgagc atrttttacga  
52561 tagcgaatrt ttaactccta gttctcaaaa ggatatrttt agagatrtca tacttgaaag  
52621 tgtttatgaa aatrttaagcg aagaatrtcc ttatrtcttg gaaatrtatga taaaaatac  
52681 caaagaaaca cccaatcttt ttatcatcga tgcacaaatc atcacagata caaatrtcca  
52741 taaagctatg cttataggaa aagatggagt aacacttaaa agaataggca aagatgcmgag  
52801 atttaaaatc tcaaaactca ttcaaaataa agtgctrtta aagctrtttg tcgtrtgtaaa  
52861 gaaaaattgg caaaaagatg aagtrtttct taaaaaaatt ctaaattatg aagaataaag  
52921 ctcatrttat aggttrtgaa aatcttatct ataaacaaaa aatrtgtaat ttcgaagaag  
52981 atagcctrtt taaagagcta acaaaagaat gtgatcttca aatcctrtt gaatatcaat  
53041 tggctrtttt aaagcaagat caaatctatc attgctrttt aactrtgggct gcaaaactac  
53101 ccaaaacca atrttgcttc cccgaacctc tcatctrttca aagctrtatrt ttagaaaaata  
53161 aatcaaaaga agggaatrtt tgcacttag aaataagctc aaaaaaggta ttrttgtgtt  
53221 tttatgagca aggtaaatrt aaaaacttta aaactcaaa ttrttgtgac aatgtagaag  
53281 aatrtataaa taaaagccgt atrttagagc ttrttacaaca ttatgaaagc aaaatactgc  
53341 taagcmgaaa agctcatgaa attatcgatc ttataagcac gaagmcaaaa cttcctrttga  
53401 aaataatrtca agaagataaa atcacactrt caaatcacag catrtcatcat cttgataaaa  
53461 atgccaatrt catcaagtat tatcaaaaac atctrtcttg gtatrttcaaa ttrtrttttt  
53521 tatrtgttct aagtrtttata atcagcattg gaatrttatc attgattgat tttacacaat

53581 accaaagtgc taaaaaaca catatacaaa atgaaatttc acaaaataaa atctatgaaa  
53641 ttcaagaaaa tcaaaatcaa aaacttaagg ccaatataga aaaacttcaa ttagaaattc  
53701 aaactcaaga tcttttacta gaaaaatact ctgagcaatt gtctaaaatt acgcaaaatt  
53761 ttaaagctga taaagataca attttgattt taacaaagat tattacatgg ttaaattgatc  
53821 attctttaaa aattgctaatt ctcatgatag ataaaaccct taccacata aaatntagca  
53881 acgaagagaa ttttaataaa gctcttcaat ttacaagtcc tcaatttaac ctcatctcgc  
53941 aggataaatt cttgtacgaa atcaccttaa gagcattaca atgaatcaaa ttgagcaatt  
54001 tttagaaaat ctaagtccta gagaaaaaat tttaatatat cttacaacca tacttctagc  
54061 agtattgtta tcctttcatt tttaccattc ttacttaaaa agtttgttta atcatgaatt  
54121 ttttatccaa agcgatgaag taaataaaat tatcataaca aatcaagatt taaaccaaca  
54181 aataaaacag cttgaagaaa aactaaattc tatccaagat aaaaaataaaa gctatgaaaa  
54241 tcatcttagt actttcaata aagactacga aacatatatt aaaaatttac aaaatctagc  
54301 ctaaaaaaac aatcttcaaa tctctaatat atcaagatta caagaagaaa attccttatca  
54361 tagaatttca gtcgatattt tgggtgattt taatcctata ctttctttta tacaagatgt  
54421 tgaaaattca aatttactat atgaaattca aaaatttgaa attgacaata catcaaattt  
54481 aaatctccat ttaaaaactaa cgctttcttt tattgcccta gtaaaaaata aaaactaaaa  
54541 caaatactat agctttttat ctataaaagc tataatttta ttttgataga aaaatttata  
54601 aaataacgca aattttaaag gaaaaaaatg aatatttaca aaacaagagt tgaaaaaatc  
54661 agacaattta tgataaaaga aaaacttgac gcttatttga tactaagtgc tgatccacat  
54721 ttaaattgagt atttgcctag tttttatcaa agtagagcat ttgtgagcgg ttttaaaggc  
54781 tctgctggaa gcttgatcat cactcttcaa gatgcttttt tatggacaga tggaagatac  
54841 tggattcagg caaaaaagga attagaaggt agtgacatac ttttacaata acaagatgca  
54901 aataaacct ttttaaaatg gctaaaagaa aatttaaaca aggaacaaaa tttaggtata  
54961 gatttttcag ttttatcctt agctttgcaa aaagaaatac aaaaaaactg caaagccgaa  
55021 ctaaaaaata tcgatttaat tagccctatt tgggaaaatc gtcctgcaact acccaaaaat  
55081 aaagtttatg aacacgaatt aaaatattgc tcctattcta gaaaagaaaa actaacatta  
55141 gtacgtgaaa aaatggctaa actacaagca caaaaccatc ttatttccag tcttgatgat  
55201 atagcttgga ttactaattt aagaggaagc gatgtaaact acaatcctgt atttttaagt  
55261 catttgctaa tcttggaaga aaaggctttg ctttttatag atagggaaaa aattgatttt  
55321 gagcttgaaa aaaaattaaa tctcgaatgga atttggctta aggattataa tgaaattcaa  
55381 gatgaactta aaaaactcca aaatacaaat ttactcattg agccttcaaa aacaactgct  
55441 ttactcattg aaatttttaga taaaagcgtt gaaattttag aagaaattaa tcttagcacc  
55501 cattttaaag ctatcaaac agataaagaa atcgcctaca tacaaaatgc catgatagaa  
55561 gatgggtagt ctttatgtaa attctttgct tggcttgaag aaaatatcga aaataatata  
55621 caaatcactg aacttgacat cgataccaaa gtcaccgaat ttagatctca aagtccttat  
55681 tatattagca atagttttgc cactatagca ggatttaacg ctaatgcagc tttgccgat  
55741 tataaagctg aaaaagaaag cttttcttat attcaaaaaa atggattatt gcttatagat  
55801 tcgggtgggc aatacaaaaa tggcaccacg gacattacta gagttgtagc tataggtgaa  
55861 ttaaacaag aacaaattca tgattatacc ctagttttaa aagcacacat agccatatca  
55921 agcacggtct ttccaaaaga tattaccatg ctttgcttg atgctatcac aagggtcct  
55981 ttatggcaag aacaacttga ttatgcacac ggcactggct atggagtggg tttttttta  
56041 aatgtccatg aaggtccgca aactctttct tatttttagc ctgtgcttga aaaaacaag  
56101 gctaaagaag gtatgctaac ttctatagaa cctggaattt ataggacggg aaaatggggc  
56161 attaggcttg aaaatttagt tgtaataca aaaataaaaa atcccaaaaa caaagatttt  
56221 ggtgaatttt tatattttta acccttaaca cttgtcctt ttgaaataag ttgtattgac  
56281 aaaaccttat tgagtatcaa agaaaaagcg tggattaatg cttatcataa ggaagtttac  
56341 gaaaaactct cccctaagct tcatgacaat ccaaaggctt taaaatggct aaaagaaaga  
56401 actgagacga tttactaaa aattaaaatc ttagaaaaat taatattgta taaaattaat  
56461 ttttctagtt ctttttcgag ctattaactt tgctttctgg cttaaaatat ccaagatcta  
56521 tcattttttg ataaatcttt gccgtagcaa cacctgagct tatagttctt ccgctgtgtt  
56581 ctacaaaac agtaaccaca taacgcggtt tagaataagg cgcataagaa gttaccaag  
56641 catgcatct tgtataatac ttaagttgct tttcatcgac tctattttta tcagcttgag  
56701 aaaaacctac cacttgtgca gttcctgttt tagcagcaac ttttacttct aaattacgca  
56761 aataatgata agaagtacca cttgctcat tagcaactgc atacatcgca tctcttatat

56821 agggaagttg gcttttttca aaaagagtga aaatttcatt actatcttgt gttttatctt  
56881 ctgtgatgct attattattht tctacacttt ttagaaaatg gggaataact tcaccgcctt  
56941 ttgcaattht agctgtatac cttagcaatct gcataggtgt agccaagaaa tttccttgcc  
57001 ctatggaagt atttaaggta tcgcttgaa accaagcttg cttatatctt tgcattttcc  
57061 attccctact tggcaagatc cccacaaatt cattaggtaa atccacacca gttttagcac  
57121 caaacctat gcgtgataaa gtacgactta tttgatctat acccacttgc aaacttccat  
57181 cgtaaaaata aacatcacag cttgctthta tcgcatgttt taaatctaca gccccatgcc  
57241 ctgctctatt ccaacaacga aaaaatctcc caccaagctc tacgctacca ttacaaaaaa  
57301 attgggttga gggattaata ctttttgaat ttaaaaaaga caaaccaacg cccatcttca  
57361 caacagaacc tgggggataa tatccgttaa taagcttatt tgaaaaagga tgatcaagat  
57421 tattagaaag ctggtcccat tctttataag aaattccagt tacaaaagga tttaaatcat  
57481 actcaggaaa acttccctgct gccaaaatag aaccatcact aatatccata atgatagcac  
57541 cacccgcatt accttcaaaa agttgtgtta aaaagctttg gagttctata tctatggtaa  
57601 gttctatata attagaaagt gccgaagtat aggaaagctg ctccacttct tgattttaaag  
57661 cattaacctt ataaactthta gttcctthtt ctcttgtaa aacatcatta taataacgct  
57721 ctattccgct ctttctgta aaattagtca gctttgcaat ttcattttct ttaatatctt  
57781 gtaagtctgc cttacctaca tagcctataa tatgagaagc taattttcca aaaggatatt  
57841 ttctttgccc tgcaggatct atgcttatat tttcatttaa attgagttct gaataatgct  
57901 tcatcatttc ttgtgaaggt ataaaatcta taattttaat aaaatcttga ttataataag  
57961 agtcattttt cttataaagt tcagcaagct tggtaacatt taaatcagga aaaaattctt  
58021 ggagttggtt taattctthtt tctaatacac ctctatttgc tctthttaaa gttaaataag  
58081 gcttaataga aatactaaaa cccaatcat taatcgcaa aggagtacca ttacgatctg  
58141 aaatttgacc acgagtagga gctataaatt cagttthttac agcgtthttgc ttggcgagtt  
58201 cttcataata cacatttgat tttatactta gataatatac acggcttaac aaaaatataa  
58261 aaaacagcag tataaagcca acaaccaaac gcattctcat taaaacttac tcctaaatag  
58321 catataagca acaaacact caaacataat cgatatcata tagccaaaac ttggcatttt  
58381 aaactcttga tctcccat aagaaaaaat agcatccaaa acaaaaataa aagcataaac  
58441 acaagaacg agtataacgg ggataatthtt tcctatthtt aaatttgttt taatccaatc  
58501 cgcgcaagta taataaaaaa tagcaaaagc aaaccaagaa gaaaatagaa aaaaatcgta  
58561 agttatatct gtaaaaaaca aaaaaaaca agaaaaatac catctaaaat caagcttatt  
58621 aaatgtthtt tgtctthctt ctaaaagaaa atacatatag caaaaaata caccataaag  
58681 caaaggcata taaaaaaaaa tagaacctaa aatttgatat aaaatacaca aaaagcctaa  
58741 aaaaatataa cttccgttca gttttacttt atatgtgctg atactthttc tcatthttata  
58801 aacctaaagt ttgcttaata atthcatgtht ctaaatcatc aagtcccat ttattttaat  
58861 tagatatcaa aatagcatct ttaaaattat thtttaagtht agctthttcg ctttgattaa  
58921 gcttatcaca thttgtaaaa acctthtaata thctctgatc aggtthttaaa aaactthttta  
58981 aatactcatc taaattthaa tcaatatcta aattcgtatg tcttgaatca atcaaatgca  
59041 caaaaagtht aatcgaactt ctcaatthta aaaactcatc caaatthttta thccatattt  
59101 cthtttagatt thttgaaacc thtcgataac caaagccagg caagtcaata aatgaatac  
59161 tgaatttatc ctcatcttht thacataaaa cttcaaaaaa ataatcaat tgcgtthttc  
59221 caggagtagc agaactcttg cggagthttt thtgcttaca taaggaatta atcaagaac  
59281 thttccccc accttgatct ctaaaaatg ccacttgcct aaaatgagat gcaaatthtt  
59341 tatcgaattt atccaaagag ctgataaatt tagcgttat tatcatttht thctaaatca  
59401 aatataaatc gagcaggctt thtatcttg cthtcaacac gataaacatt atthcgtthta  
59461 tctactacta thctatctcc ataaagthtt tgattactth caagctcgtht gatataggca  
59521 thttccgtcaa thtcataaat atctthtagct acattataaa taaattthac cccactthcc  
59581 thtatagtht thccctthta aacgattthta aaattagcat thtgcacagc thcataacga  
59641 atagthttgc gattthttatc tgtatatata atcactthtt cagcagthta aacatcatcg  
59701 ccccttatga thtcaacatt accgctgagtht atgctthtcg ccttgthttc atctgaataa  
59761 aaatttaagg cthtaacctc tatctggcta gctaaagata tgcttatact catcaaaaat  
59821 aaaattatct thctaacac gcattcactc cthgaacttg taaaattthc thttccacat  
59881 cgtagthttg agtattthccg thtaataatac thccatttht caaagctthta aatcctgtht  
59941 ccgtgctthta aattthattc thtaggctcat atthcaactth atcagcaagtht atthtagtht  
60001 tattagagcc tatataagtht acattthcct caaacaac cthattcatt thcttgcctt



60061 taagttctag tttatTTGca cttaaattaa aatccaaatt gaaattaaca aaattatcaa  
60121 actcatcttt atctacataa cgcgtccaag tttgtgcttt gtaatatgat tttacattac  
60181 ttgcattaag ctcataagca tttaaattga aagcttcgat atttttaaaa tttaaagcat  
60241 aggatttaat atttaaagaa taaggatctt gcaaacttaa aattgtaaaa gtaatagtaa  
60301 aaagcgcaat caaaattcca aatattctta tagccaaagc ttatccatt cctcttgcat  
60361 attatTTTTc tttataatat attctatcat ttgagccaca gctgctttac cacctTTTTt  
60421 atcaagtgtg atatcgactt ttaaactctt atgtgcatcc ttaggtttaa aactaagacc  
60481 tacatTTTca agtaaatttt tatcattaaa ataatcccct atggccgcac attgagaaaa  
60541 atccaaattc agctcttcta aaatTTTTt agcacaagtt aatttatctt taacacctg  
60601 atgcacaatt tctatcttca aatccttagc acgagcactc acgcaaggac agtttcttcc  
60661 agtaataata gcaatTTTTt tacccaattt aatccaaagct tcgatagccg caccatcttt  
60721 gacatcaaat tctttaatca cacttccatt agaagtgtag atgattttac catctgtaag  
60781 acaaccatct acatctaaaa atatcaattc tatcattttt actcacgcac aacaaaagca  
60841 ccagcaaatg caccacttgc cgcaaatct cttgcttctt cttcacttct aaatcctgtc  
60901 aagaaaacac gactcaaacc atcaactgaa cttttgcgta tagttgaaga ataagttcta  
60961 taagttttat atctagatgc tatagtttga gctcctgatg ggtttttaaa cgctccaatt  
61021 tgcaccataa aatTTTccacc ctcatagatt tgaccgttat tggcaattcc accgctagtt  
61081 ccataattta tatttgaatg aacgacatta ttacctgaat tagccgaacc aaaacctata  
61141 acctcaagtc ttacgggtgc tgttcctgca gcaatcatat cgatttgatt tgcagcgccc  
61201 ttggaaagat ctataattct attatTTTaca aaaggacccc tatcgTTaac acgcacggta  
61261 acttggcggg tattatTTTaa gttggttacc tttaaaatgg tattcatagg caaagttTTa  
61321 tgagctgctgg ttaaaccatt ttgattataa gtttccccat tagaagtttt tttaccatga  
61381 aagcctggcc cataccaact tgctatacca tctgctgttt cacctactga tacaacagtt  
61441 ggataataag tcttgccatt tatggtataa ggtttcatag tccccttgct tccagaacct  
61501 gagggactac tatgaaaatc gttgcttggg taatatattt gtgctgaacc tacgctagaa  
61561 aaaagacctc caaagcatcc gctagaaaaa gttgcaacta aactagcggc taacaacttt  
61621 ggtaaagttt tcttttagctt ttgttttata gtttgcaatt ttattctcct taataggtat  
61681 gattaatttt tgattaatgc ttaagtgatt tttagcgatt ttattcaatt ctcgaatttg  
61741 ctctacgcta gtattgtaag ttttggcgat tttatataaa gaatcacctg attttacaac  
61801 ataaacttta gtcataggta tagttgtatc cacttttgca agcttttcaa ctttaaaatt  
61861 tttatcaaaa aaagctactt tattttaaagg aatatacata taatatccct tacctggagg  
61921 agtgaacca tgTTTTaaatt gtggattata ttttttaaaa gttgctaagt ccatatTTaa  
61981 attttttagct aaatctTTTta atgcaactga agaaggagca tcaactTTTg caaaatcatt  
62041 atTTaaagcg taattaacca aagagccatc tttatcaagt aaaaaatctc tgtcgTTtagc  
62101 caagaaagct agagTTaaaa ttttacgtat aaaatTTtcta gtttccaaag aaagatattt  
62161 tttatcagaa tcaagcaaaa ttctTaaatc atcacttctt gcttgctTTa ttgcttgacg  
62221 caatTTTcca tttccacaat tataagctaa aagtgctaaa taccatttgC caaactcttC  
62281 tttTaaactt tttaaataat gaaccgcagc atatgtggat tttacaggat cgcgtcttC  
62341 atcaacataa gcatcaattc taagtcctaa atttcttgct gttggTTgca taaattgcca  
62401 cacgcctaca gccttagcat tagaaacact atgtgctTTt aatcccgatt ctaccattgC  
62461 tagatataat atttcttctg gaacttcttg ctgcgctaga atttttctta tcataggagt  
62521 aactTTTgag aaatTTTgta taccatcaat caaagtcggT gcatgcttCg atctTaaatC  
62581 ctgTTgactt tgcacaaaag ccaaatcact tataaaactt ggatcaatat cTaaatTTtC  
62641 taaaacactc atTTgtctTT cataaaattc aggagtagta gtttgCgcaa aaagaaagtt  
62701 gTaaaataaa ataaaacata atataatTTt tttcatattt aacctTTaaa aaataatcta  
62761 taggaatttt ccaaacaat ccTaaaagc tcttgtcttg gTaaatcaag aatTTcactc  
62821 atTTtattgg ccaccaattg agtcaataaa ggctcattc tTTTaccgCg ataaggctct  
62881 ggagtaagat agggcgcacT tgtttctagc aacaatctat cTTTtggaaT ttgtggTaaa  
62941 atatttacta aatTTTtagc atTTTtaaat gtcaaaacac caccgattc aaaataaaat  
63001 ccatcattgc taaggcGcaa taaatgttCg cttgcattaa aacaatgcaa aaccctcca  
63061 acaagatctt tagaatgttC atgTaaaatt tcataagtat cgttatTTTgC ttCgcgagag  
63121 tggatgataa caggctTTTt gaattctTTa gctagttcaa gctgggctac aaaaagctct  
63181 ttttgctctt cTTTtctTTt ttctctTTtC tTaaaatctt cactTTTaaa acgaaaataa  
63241 tcaagcccgc attcacctac agccacgcac ttttcatctt tTaaatacgc tcttagaatt

63301 ttctcatcaa aaccttctag ctcataagga tgtacgcctg cggcaaaaaa tacattttta  
63361 tatttactag caagatctgc cgcataaggc aaatctttaa tatctgcgcc tggatgatg  
63421 attttttcta tgccattatc aaacgaatgt tttaaaagct cgtctaaatc ctctttaaac  
63481 acttcactat ctaaagaca atgagtatcg acgatcttta aaccatcttt aaattcaaga  
63541 tttagaaca tacttctact ctatctttac cattggcctt agcttgcgaa agtgcttttg  
63601 aagctttatc aactaagggt tcaaatttat ctccactctt agcaaaaacc actcctatag  
63661 aagcggtaaa aaagacttca tccaaattga ctaaaattcc agcttttttt atattgactc  
63721 gaatgcgaga aagaatttta atcgctcttt cttgtgaaat attctttaat actatgcaaa  
63781 ttttttcagc actatatcta ccaactatat cacgtccttt ggtttcgtta ataatctcat  
63841 cagcacaat tttgacgatt ttatccccta ctccatagcc atattcttca tttaaatttc  
63901 ttaaattgtc tatatccaag aacgcaaaag caaattcttc ttctttgcat gcaatttcat  
63961 ttaaataatc ctcaacacaa ttcaacaaag cattggaatt ttttatcca gaaataggat  
64021 caagattggt ataaataactt aaaaattgca tattggccat ataataaga catttatcta  
64081 agcgacaatt taaactttct ttacttaaag gttttatcaa atactcatta gccccactta  
64141 caagcaact agcctctaaa gcatcatctt tgtcgcctaa aataattaca cctaattcgc  
64201 tatcactaaa acgagttctt acctcactta aaagctcgtc tccactgata acaggcatat  
64261 ttgcatcagc aataataagc tttatatcat tattatcatt taaatagctc attgcttctc  
64321 cgccatgagc agcagccaaa aactaaatt ttctttgtgt gagaagtttt tttatttcat  
64381 tacgctcaga aagtttactt agggctaaga taaccttggg ttttagcatag tgttcaagct  
64441 taacaataga atctatgatc tgatctatac aggtatcgtc ttctttaaag atataatcta  
64501 aaatatcttt atccataaat ttatctcttg tagctttatc attacttgca gtcaatacaa  
64561 taacaggcca attttttgcc aagagataat ccaccacttc tccattaggt gcatcaggca  
64621 agcataaatc tgcaaaaagtt aaaaaatatt catcatcggg caatgcttta acttcagcaa  
64681 ggctaaaaac aatatcaact tcacgattta aagtagtttg tatcttttta gctaaaagct  
64741 ttccaagcat tttattatca tcaataagta aaattttttt attcataatc tataaaaaata  
64801 ctttttttaa aactaaatct ttataataaa attaaaaaaa tcccaattct aacacaaaca  
64861 aataaaaatt ccgcttaagc tttaaacaaa gtttttagcaa attccaaagc ttcactgtga  
64921 atagtctcgc cacttatcat tcttgctaatt tctttaattc tctcttcatt ctttaagtttt  
64981 ctaaccgtgc tacaagaagc atttttttca accaaaaaat gattatgagc ttttgaagaa  
65041 agctgtggca agtgagatat agcaaaaatt tgataaaaag cagcaagctc atttaaaaca  
65101 ttggctatac tcatcgtctc cttaccgctt aaattagcat caatctcatc taaaaatatt  
65161 atccctgtgc ctgaatttaa aattttacac tcagtagcaa taaaagcaag tcttaagcga  
65221 ttaagttcac ctgagcttaa attttttaaa tttgcagcat tgatacttaa cttgatctca  
65281 tcttttccca aagaggtgat ttttgaata tttactaatt ctaaactcac atttttcata  
65341 taaagatttt ttaaataatt atttaaataa tcctctaag tttttaaatt ttgcatgcga  
65401 gcttgagtta ataactgggt actttgattt attttcttt cgattttttc tagttttttt  
65461 tcaagttctt ttttttcaa gcttaaatta tcataatgag cgagttcatt tttttattt  
65521 tctagcactt ctaaagcatt ttctatactc tcataacgct tgatcaaaga ggataaatcc  
65581 tcgattctat tgagtacttc ttctatatca aaatccaaat cttcgatttt ttcattttgc  
65641 gctatgatac gaagttcatt taacattcg ctaaaaaac tcgtatcttt ttactgaga  
65701 tttaaagcat caatgactac tttttctaatt tcaaaaatag catttgcctt ttccaagct  
65761 gcttctatct tgtctttttt tgataatttc tttttaagat ttaaagctc ttcgtattct  
65821 ccgatttttag gattgatttt agaaattctt tcaatctgtg tgcttgctaa ttctttaagc  
65881 tcttcaatcc ttttttcctc ttctaaaatt gtagtcaatt cttctgaaat ttgaagccat  
65941 tgtttataat cgtcttttaa atgagataaa aaatcttcaa attcaggatt tttcacacat  
66001 tctaaagcat ctaagagatt taaaaatttc tcattactaa attcattgat ttctttggcg  
66061 cttaggtatt taataaattt tttacttaga tgaatcaaac tttttttaga aatgctttga  
66121 ttattgataa aatatttcgc attcttatcc tttaaaagtt taaaaacatt ttcatcttca  
66181 ctttctatgc cgtattcttc taaatctatc ttatcatcaa gtgcaatctc aacaagcttt  
66241 gcctcactat cgcttaatgc aaaagcagac aatataacct taaaaagtac agactttccc  
66301 gctccgctta aaccgtaaa gactgtaagt cttgagaaa tttcaagctc aacttcttta  
66361 aagccaagat tttctttcat taaaactcta tttatcatca atgtcccaa ttcaattttt  
66421 ctcttaatat ctgaaaataa tctcgatttt taggatgtat aagtgccaca cttttatcgc  
66481 taagccccac cttaacactt ttaaaatcat tcattttgtt attttcttgc ccatctatac

66541 taaaaataca atctttcgcg cctatttcaa gatcaaaacc cttaggcaat actataggac  
66601 gttgagttaa agaatgcgaa caaacaggtg tgagtataaa agcttgtgct aaagtataaa  
66661 ctataggtcc atttgcactt aaattgtatg ctgtagagcc tgctggagta gctactataa  
66721 gaccatctcc aaaatattca ttaaattttt tagccttgcg aaatacttct atatgtgcca  
66781 tagaagcttt tctatcctta ctgatcacta catcattaaa agcaaatfff tgcgtgattt  
66841 gaccatcatt agcttctaaa ataatactca ataaaaaagg attttctacc ctaaattctc  
66901 ccctaaaaaa agcttcaaaa aaaacttcag cttcatccac cttaaaatcc gttaaaaatc  
66961 ctaaagacc tgcatgaatt cctaaaaccg ctttattgtg ctcacaagct tttcggcata  
67021 aagaaatcaa agttccatca ccccctaagg aaattacaaa atccgaaagc tcaaacaaag  
67081 tatcaaggtc gtatfffggc aatfffatat tttcagaact ttccttataa agtaaaagtt  
67141 ctacaccctt tttttctaaa atttctttta gagttaaaat ttccttgtct aaatffgaat  
67201 ttggacgcmc cgcaagccct atfffttttaa tgffffataa atctatfffata tfffgcataa  
67261 aaaattataa caaatcttag ctaagcaaaa gaataaaaat attataatff taacttatat  
67321 gttaaaaaaa ttaatfffca aggaaaaatf ttgcgaagtc attacaacac agacttaaat  
67381 tctgccaca taggcgaagt agttaaacff tgcggttggg tcaatagcta ccgagatcat  
67441 ggcggcgtaa tfffatttga tffaagagat cgtagcggta ttattcaact tgtatgcmat  
67501 ccaaatgata gcaagaagc tcacgaaata gcctctcgc caagaaatga atffgtffta  
67561 atagccgaag gaaaaatfcg accccgagga gaaggactta caaatcctaa attaaaaaacc  
67621 ggtgaaattg aagtagtagt aagcaagctc attatcgaaa atgaaagcmc tgcctctcct  
67681 tttggcatag gcmatgaaag tgtaaatgaa gaattgcmc ttaaatatcm cttfftagat  
67741 ttaagaaatc ctaagctffa tgaaaatfff gcactacmct ctaaagcttg tatagccmct  
67801 agaaatctt tggcaaatat gggatfffata gaagttgaaa cccctatcct aaccaaagct  
67861 actccagaag gagcaaggga ttatcttgm tcatcacmcm tcmatcaagg agaatfftat  
67921 gctcttctc aaagtcacaa actfffcaag caactfftaa tgtgtagtm cttgmcmct  
67981 tatfffcaaa tcmctaaatg tfftagagat gaagatffa gagcmatcm tcmcmctgaa  
68041 tttacacaaa ttgatmffa aatgagttt tcmcaagct tcmcmgtaaag aatccaaat tctffftaga  
68101 gaaacctfff taaaagatat cttcaagcm tatggaaaac tacggaaagc acaagcmctga tffgcmctff  
68161 caaatgcmct ataaagagcm tatggaaaac tacggaaagc acaagcmctga tffgcmctff  
68221 gatttgaaac tmatcmatg tatagatatc tffgcmagat caaataatga aatffftgca  
68281 aatattgcca aagacagtaa aaaaaatcm gttaaagct tcmcmcttcc aaaggmctgmat  
68341 actatctfff caaaaagaa aatgcaaga tffgaagaat tfttcmcaaa atffggggct  
68401 caaggcttag cttttataca agttaaagaa gatgmctta aaggcmctct tftcaaatff  
68461 ttcaatgaag aggattffaa cmagcttacc aagcmctgm aacttgaagt aggcmatgm  
68521 gtatfffffg tgmcmagmat taagaaaact gmcttgm atatgggaag gtttagaatt  
68581 ttcctagcm gagaactff tffaataca cctmatgmct tagaattctt atgggmctgmat  
68641 gattttctta tgmffgaaca aatmatmat ggaagcmct ctgcaatgca tcatcctff  
68701 actatgcaa aaaaatcmga tmatcmctg ttagaagaaa tctcatctat cmcttatmat  
68761 gttgtactca acggcmffga actaggmcm ggtagmataa gaattcataa aaacmatatc  
68821 caacaaaaag tctffaaat gmcttaacatc matgaagaac acaaaaaaga aaaatffgga  
68881 tfffacttm atcmctaaag tffgmctgm cccacacm gaggmctcm cataggactt  
68941 gacagactta tmatcmatg aacagggmca aatagmataa gagaagttat agmatffca  
69001 aaaactcaaa gagcmamat cttmatgaa matgmcmct gattgmcaaa gctmatcmgm  
69061 atgagagaat taggaatcaa attaagggag aatgmataa gaaagaatta tffftaatta  
69121 taggtgcmcc aggaagtmga aaaactacag atgmctgfff gattgmcaaa gctmatcmgm  
69181 atgttactca ttattctaa ggagatctff taagagcmga agtagcaagt ggtagcmcm  
69241 ttggtaaaac matagatgm tfftatctta aaggaaatff agttcmcmct matgmctgm  
69301 taaataccat agtttcmga ctaaaaactc cctctacaaa aacagttat atcmatgm  
69361 atccaagaag tmtagaacaa atgmmtaga tmtagaaggt tffaagcmga caaatgaaa  
69421 tffgtctffaa ggmmtaatc gaagtaagag ttagcmga ca agtagctaaa matcmcmct  
69481 taggaagaag tcmgtgmga matmataacm aagaagmat ttacaataga atgaaagmat  
69541 ataccgagcc gctagaagaa atmatctt tfftatcaaaa gaaaaactt matctmatca  
69601 tcmatgmga acgmctatc gaacctatcm ttmctmatat gaaagaactg attaaaaaaa  
69661 ttaaaagmat ataaagmata aaaaatgmct taagcaaaat caaaatcmga matatffca  
69721 acaaaatcaa tgmctgaatt gaaatffca acgmctcaag mattaaac gaaatcmata

69781 aagatagcgg tgcgatcatg gtggatcgcg ttatggctag cgcgatgttt tatccagcaa  
69841 attatggttt tatcgcaaac aactagctg atgatggcga tcctgtggat atcttagtct  
69901 taaatgaata ccctatccaa gcaggcgcag ttattccatg tcgtttaatc ggtgttttaa  
69961 tcatggaaga tgaaagtgga atggatgaaa aacttcttgc tgtgcctaata tctaaaatcg  
70021 atgcaagata tgacaatatc aaaacctata ctgatttacc acaagcaact ctaaataaaa  
70081 tcaaaaatct ctttgaact tataaaatct tagaacctaa caaatgggta aaagtgcag  
70141 atttcaaaga tgaaaaagct gctattgaaa ttttagaaaa agcgattaaa aactacaaat  
70201 aaattcttta tttagccttt tataggctaa atctttaagg aaaatcccta tgaaaaatat  
70261 cattttaggt ggtggatggt tttgggtgct agaagctgct tttgaaaatt gcgaaggcat  
70321 tatacacact gaagtgggct acacaggtgg aaacgataac cctagctatg aaagcgtttg  
70381 caatggcgat ggtaatatag aagtagttaa aatcatttat aatgaaacca aaatctcctt  
70441 agaacaaatc ttaagcttat tttttaaata tcatgatcca actagctttg acaagcaagg  
70501 agctgatata ggaattcaat atcgttcggc gattttttat gaaagccaaa gcgataaaaa  
70561 cactatagaa gattttataa aaaaagaaca agtcaatttc ccacttccaa ttgtcacaca  
70621 aatttcaaaa cttcaaagat attacaaagc agaagattat catcaacatt attttataca  
70681 caatcccaac caaagctatt gtcgttttgt tatagcgcct aagctagaaa aaatcaaaaa  
70741 ttacgagtga aattatcttt ttaagttttg aaaattttac tttttattca caggcttttc  
70801 acgatgtgat tttcttttca aagtacctaa aaataggact ttaagtttta aatcttcga  
70861 aaaaacattt attgtttttt aagttttttt gtgaatttat ttgaagatgt gaataatttt  
70921 aatatataat aaaattttag cttctatacg aacttaatct taaagaattg aaaatcaatt  
70981 tttccttaat ttagcgatga aaaaccctgc atattcctca cagggcaaaa tgcgtttgca  
71041 tttagaaatc tcctcaaatt ctctactttg cccattttta gccaaagcat tttctaaatt  
71101 tatatccaaa agttctatat caaaatcact tcttaaagca ttttctatca cttcttcatt  
71161 ttcctctttg gtaaaagtac aagtgcata aacaagctct ccacctactt tcaaagcctt  
71221 gagtgcagaa tgtaaaagtt ttttttgaag tttggctatg tttttaatct ctttagaact  
71281 tttttctaata tctaaacca tttttgctaa agtagaacia ggtgcatcaa gtaaaatttt  
71341 atcaaatttt aaggacata aatctcctat atttttacca tctttcataa aaactcgagc  
71401 ttttactcca taatttttca aattcttttg caaagtaaaa aacctgtcct tacttgcctc  
71461 attgcaagct agatagcctt ctttttgcac aaaattagca agatttatac tttttccacc  
71521 aggcgctgca cacatatcta aaacgctttg ccctgctttt acatctaaat ttaaagcaca  
71581 caaataagat gcataatttt gtatataaaa tttaaattca ttaaagctt gcatagaact  
71641 taaaacactt ttatcacaag ctttaaaaag atagcagtac tcgttaagct tttcatactc  
71701 taaattcaaa tcttgaaatt ctctttcaag tgttaaatta tcacatttta ggcgatttat  
71761 aaaacaacat atttttttag gcaattttaa agaattttta agattttcaa gctctttatc  
71821 attataaata ctagctagat tatattccaa aataatcctt tatcatgatt aaagctgcta  
71881 aagagtctaa tttagcatct tttttgcgtg tattagctac gccataccct aaagcttctt  
71941 tgcttgttcc actttcatct acaaagcggg tttctttatc aaattcaagt aaagatacaa  
72001 aatgcttaat gcgtcttgtc atttcttctt cgcttgaacc tcctttggga atacctacga  
72061 ttaacaaaga aatatcatga atttggatta aatttttaac ttcatttgca gcttggttgc  
72121 ggttttttct gattatacct tctaaaggaa tggcgatttt atctatacaa agcgccacgc  
72181 ctatacgctt taaaccaca tctaaggcca aagctctcat accaaaacc ttataaaaag  
72241 accttctatg gaaatttttc cttcaagctc gtactcatag actttttctc cataaatttg  
72301 agttgcctca tccacgctta cgccctgtct acaaaagtct aaaaattcat ctttttctt  
72361 ttctataata ccaaaacaac ttacaaattc tttaaaatct aaaagtaaat ttgcatttct  
72421 ttcttgtaaa agtaaatttg tcccacgct ttcatTTTTG cgttggggta aaacataata  
72481 aggtttatta agctccaaag caagccttgc gctttgcata gaaccacttt gcaaatctgc  
72541 ttgcgcaaca acaacagctt cactcaaagc gataatcagt ctatttctaa gtaaaaaatc  
72601 ataaggttta ggcttataat gggattcatt ttcacttaaa gccaaagcat tttcataaat  
72661 ttgttttata attttttctg tacttctagg ataaatttca tcaagaccgt tagcaaaaac  
72721 ccctatgggtg cttggcatag ccgccatact tgcgcttata tcaacaccta aagcacctcc  
72781 gcttacaaca cttatttttg aattcttaag caagcttgaa agttcaaaaa cacaattttt  
72841 agtgtaagta ctatacgcc tagagcctat aatggctatc tttctttggt ctaagagttt  
72901 taaatttcct ttataataaa gtttttttagg aggatttttc aactctttaa aaagttctag  
72961 ataattgctt ggaagttcat tttgcataaa tttcacttaa atacactaac tcaacacttt

73021 caagtaaadc tttgctttgc tctaaggcct taaaggatt ttttctaggg tgtcctatag  
73081 ctatcgcaa gccttttttc ttagcaagat ttaccgcctc catgagttgt tttttaatat  
73141 aagcaacatc gtcttgattg tctaaaaata catctctttg tatataaatt tgacctaaag  
73201 ctttagctac tttaggtgct ttagaacttg ctatggtttt agaacttaca aagatcaatt  
73261 cttctttttc aaaagcctta tagagttttt tcattgcttt ttcactactt gtaataaagc  
73321 ttcctgtgtg attattgata aattttaaat ctttaaaatc tttttttatt tgtttttatt  
73381 ttttaaaaa acgcttttca ctatcgcttg gatttaaggt atcaagctca ggcttagtat  
73441 aattcatcgc cgctaaaggc aagtgcacca tataaaaatc aaatttttaa gcaagctttg  
73501 gagtatcgat atgattttta tcaggcggaa aaaatgaagg gataagcttg agttttaaag  
73561 cctgtaaagc ctttaactga cttatatttg ccatatcatc tataataata gcaagacgag  
73621 cttgtttaat tttgcttgaa tttgtatctt ttataagatt ttcttccttg cttaaatfff  
73681 gatctggcac aaggcttaaa ttttcatcta gtttgcttaa attttgttct ataactactg  
73741 ttaaatttaa atctttgatt tgttgttcta agatactttg attgttttct tggaaattat  
73801 cattttcatc tttgtaagga atttctttaa aaataccga atgattttca ttagatatat  
73861 tttcttgctt aggttctatt gttgtatttt tactagagtt ttgagcgaat tttaatgcat  
73921 tttgagaatc ttgatattga atcaaaattc caaaaataa aatcacgcat attaaaaaaa  
73981 gtatagcgat gattaagtaa cgcttgattt gaatcagttt ttttgacaat tttagttctt  
74041 atctttatca attaatffff tagcactgat ccaaggcatc attgctgta aattacggcc  
74101 tgtttgctcg attaaagaat tattcatatt tttgcttct gcatgcattc ttgcaaagcc  
74161 tgcacggcgt tctaaaatga aatctttagc aaagtttcca tcttgatat cttttaaaac  
74221 acctttcatg gcttttttag tttcttcagt gataatffff ggccctgtaa tataatcacc  
74281 gtattctgca gtgtttgaaa tagaataacg catatctgca attccacctt gatagatcaa  
74341 atctacgata agttttatct cgtgcaaaca ctcaaaataa gccatttcag gctcatatcc  
74401 tgcttcaacc aaagtttcaa atcctgcttg aatcaaagca ctaagcccac cacaaagtac  
74461 agcttgctca ccaaaaagat ctgtttctgt ttcagcttta aaagttgttt ctatgatacc  
74521 tgtacgacct ccaccaatag cacttgcata gcttaaagct aaatttttag catttttgct  
74581 ctcatcttga tgaatcgcta tcaagcaagg agttcctcca cctatagcaa attcatttct  
74641 tactgtatga ccagggtgctt ttggagctat catgattaca tctataccct taggagctac  
74701 gatttgacca taatgaatat taaaaccatg tgcaaaagct atagccttac cttcgcttaa  
74761 atttggcttt atttccgcat taaaaatct agcttgaatt tcatccggag ctaaaatcat  
74821 aatcacatct gctacttttg aagcttcgct cacgctcatc acctcaaaac ctgcactttt  
74881 tgcttttaga aaacttgatc catcctcag aagcccgatg acaacattaa ctccattgtc  
74941 ctttaaattc atagcatgag catgtccttg agatccaaag cctataattg ccactttttt  
75001 tgatttaatc aaacttaaat cacagtcttt gtcataataa actgtaacag ccattatfff  
75061 actccttaat aaattcaaaa ttaaagagct tattataaca ataaagtttt aaatttcata  
75121 ttttttttat aaactttatg caagaattct caagaaaatt tacataaagt aaagcagtga  
75181 aagaatffff aaacaatctt aattatggca taagtgtca tgaagttagt aatgaattta  
75241 aacaaattct aagagagctt cttagctaata acatcatcaa agaacacaaa aatagatatt  
75301 atcttaataa cggctatggt tttggaactc ttgatatttc aagtaaaggc acaggatttt  
75361 tacagtgttt tgatgagagt tttaaaaaag atttgcttat agaaaaataa aatttaaaag  
75421 gagcaaatta caagatatc gttgctgcta aattacttcc cttaaagaaa aaacgcccta  
75481 gtgctaaagt agttttgggt ttaaaaagag ccaacgaac ctcaattgtc atcacaaaa  
75541 gatacggcga agcaattctt gggatgaata ttaaaacagg attaagcacc gccttaaaag  
75601 cctcgcaaaa atccctaaaa gcactacctt tggggacaat tttaaaaata gaaaatcaag  
75661 ataacaacat catagaagtt ttagggcata tcgatgatga aagcatagat gaaaaaattt  
75721 ctcttgcact ttttaacaaa aacagtgaat ttagcgtatc ttgtatcaaa gaagcttttag  
75781 ccaatggaga tagcgttgat gcaagtatgt atgaaaatcg cttagatcta agagctttgc  
75841 ctttttgca c tatagatcct gtgcatgcaa aagattttga tgatgcaatt tattttgata  
75901 cagaaaaacg cgaactctat gtcgcaatcg ccgatgtaag cgagtatggt tatgcttata  
75961 gcgctattga taaagaagct agaaatcgtg gattttctat atattttcca catattgcca  
76021 tacctatggt gcctcgccct ttgagtgaat acatctgttc tttaaagcct catttagatc  
76081 gcttggcgta ttgttttaaa atcacgcttg attttagactg caaagtcgta aaagaagaac  
76141 tttttgaaac catcatcaac tcaaaacgcc gtttttaatta tgatgaagtg gatgaaattc  
76201 tgattcaaaa gccagactta aaagaacttt cttggcttta taagcttttt gaaatcacia

76261 aaactttacg caaaaatcgc cttaaaaacg cttttgaatt ccgcactgaa gaactaagga  
76321 tgaatthtga tgaaaattta agtcttcaaa gcacgatttt tgaaaaagac acaccttcac  
76381 ataatttaat cgaagattgt atgcttttag ccaacaaagc cgccgcaaaa ctcatcgatg  
76441 taggtgtttt tagaaatcac tccagtgcgg acatgaaaaa gatagataga cttttaaatg  
76501 agcttttaga gcttggaaat gatgtgaaat taaaacccaa cctgcctgag cttatacgcg  
76561 atatacaagc tttagccgat gagcttggct taagggcaga agtggataaa ctcatcatta  
76621 aagctcaaaa aaaggcggaa tattctagcg aaaacggagg gcattttggc ttgggttttg  
76681 acaaatactc acattttaca agccctatac gcagatattc tgatcttacc ttgcatagac  
76741 ttttaaaagc caaacaacaa aaagatgaaa aactttttta ttacctactt ttaaataac  
76801 aaagcacttg cgaaaacctt agtgtgcttg aaagagaggc cgataaagtc gcttatgatt  
76861 ttatggatag gaaatttgca agatgggcag ctaaaaatat aggcaaaaaa tttaaagcct  
76921 tagtagtgca aatgatgga atttgtatag caaaacttga tgatgagatc aaaggagctg  
76981 acatcatcct ttatgataca cgggtaaatt tgctagaaag tgtagaagtg caaattttag  
77041 aagctgacat catcatggca aaaattttat caaaaatcac ccaaagactt agaaaggaaa  
77101 gtaatgtata gaaaagaact tcaaaattta ctttcaaaa atcaaattga taattttttc  
77161 tttctttatg gagctgataa ttttcaaagt gagctttatg ctgattttat caaggaaaaa  
77221 taccaagcag atgaaatttt aaaattttt tttgaagaat acagctttac tcgtgcaagt  
77281 gattttctaa gcggaggttc gcttttttagc gaaaaaaaac ttttagaaat caaacctct  
77341 aaaaaaattc ccacaaaaga acttaaagtt ttagttgagc tttgcaaaaa taataaagac  
77401 aatttcttac ttttagaact ttacgatgaa agctctaacc aaagcgatat agaaaaaatc  
77461 ttttctccta attttgtgcg ttttttcaag gccataacg caagagaagg gatagagctt  
77521 ttaagcataa aagcaaaaca actccatata gaaatcactc aaaatgcttt atttaccctt  
77581 tttacaagct ttgatgagaa tttgtatctt gctgctagtg agcttaataa attcagcggc  
77641 ttaagagtag atgaaaaaat catagagcag tattgttata gtttaaacat aggaagtttt  
77701 gaaagcttct ttgaaaaaat tttaaaaaga gctgatttta aaaatgagct tgagaagatt  
77761 ttagacaatt ttaatgaaat cgactgatc aactctttaa attctgcctt ttaccgcctt  
77821 tttaagatcg ctctttatgc taaaatttat gggaaggtgg attttaaga actcttaggc  
77881 tatactccc cgctcaagt agcacaacaa ttaaacgagc aagctttcag tctaaaaatc  
77941 aaacactata aagaaatttt caacctttta cttaaaagtg aatatgagct taaaactaat  
78001 tccaaactcg ctaaaaaaga atttctaact gccactttgc taaagcttgc aaggattata  
78061 aaaagttaga ttattgacaa tctcatttct tatttttgct ctttaaattt attgtaaaat  
78121 ttctctgctt aaatgagatt attattttaa aaaatcaatt tatacttcac tccatcacia  
78181 gtcgcatgag gtgcaaatcc tcaccttggt agattttata ctctatactt tcgcathtag  
78241 gacacttaaa aacattttct tctaaaatgc ttgtttggtc acattttaaa cacaaaattt  
78301 caagcagtggt aagttctgta aattttacat tcaaatcttt aaaatcttct agttttgatt  
78361 gataatcatc tacaatttta ccctatcctt agggcttggg tttaaagcca ttttttcaat  
78421 gattctaaat tcttgttctt tttcaaacg atgatttgct tcccaatgaa tcgtatataa  
78481 aggagaataa agtaattttg caagcacagc aaatattata ataattatta tacaaggtat  
78541 ataaatcctt taagtttgta aaaaggttta ttcatttata ctctaaaaa tctcagctat  
78601 tttgcaataa ttattgataa tttaatcctt gcattaatga acatatttca tatattcaaa  
78661 tctcctaaag attttaatta ttttcttttt gtaattcttc attcattggt tacactcttt  
78721 tagtttagat tgtatggatt taagttcatt gatttgtttt tgaccgagtt tgagttttgg  
78781 ataattattg tttatatttt ctattttcat tttaaagataa tcatctttat aggcaataaa  
78841 ttttaattttt gaatttataa gattgatata tctatcaact gcaatatcaa ttttttctat  
78901 gccattttaga attgctatgg ttttgggatt atttaaatca caaataggag ctatggaaag  
78961 ttcccttagg tacatattgt tagcaaacgc accatctaag ccaatcaata gattaatata  
79021 tgttacaatt tctattattt caaaatcatt atcatttttt ttcaaaaaat cctcttctaa  
79081 acgagcattt aaaaaaata aaaaatcttc aaaaatttta aatctttcct tatcaataaa  
79141 aaaataagtt tgatgtccta taaaagtttt ttcattatct aaaagataaa gtataatata  
79201 catatttaat cttaaaacaa tttgactagc ttttcttgta agctcttcat cttcatctgc  
79261 aatccataa aaagttagaa tttgcatatc ttcaatactt gtttgatca tcttaagatt  
79321 ttttaataatc atttgcgtaa ctttttcttg gttataagtt tctttgttta attttttagc  
79381 atactctaat tcctctttgc cttcattttc actccacttg attaaaatac taagattttc  
79441 tcttgctttg ctttcattat cttcttttaa ctttagagct tcatggataa actcataaac

79501 actactaaca actgcaataa aaaccaatac aataaaaact atagtagaaa ttctttttga  
79561 tattttaagc aagtttttta cctttaaaaa taatattatt ttgtattata atcttatcaa  
79621 atcaaagatt aaagtcttgt tcttttgtgt tgcttgatt ttgatttata cttatatctt  
79681 tttgttttaa atttaaagaa ggattatfff tagaatttgg cgagtttggt tttatagggg  
79741 tgaagatagt taaaaatcaa atatatfctat cctttatatt ttaaagcttc ctttgtaagc  
79801 attaaagttt tttttgtttg atcgtaaat gcaatgagtt ttaaaatttc actcgttctt  
79861 tttggaaaaa tttgaataaa atcatcttta aaatcaaatt ttctttttat attggtatta  
79921 aaataagcaa acgcatcact ttgaaaaaat cgtcccatta aaataatata ttcttttctt  
79981 ttgattatff ttttatatff ttgttcattt agtggcaaat caatatctaa gctcgatatt  
80041 gctttattat aagtaatcaa agcaccttgt aaaagcacia gcttatcttc tttatttgaa  
80101 attttattca ttgtttttaa aagtatttct aaaagtttta atgcttcatt tttatcataa  
80161 gcaagagctg atctttgtgg ataattttta gcctcattta taagtaaatt tgcattataa  
80221 agaaaggcta attgattgat atttttaaga gagaagatat ctttgtttga actttcaata  
80281 tactttaaaa tttctttatt ttcttgtttg ctctgctcta taagcttaga ggaaatatta  
80341 gtataatcct ttgcaattgc gtttttttgt aaaatttgat ctgctaaaac aaaagagttt  
80401 tgtaattttt ctttctgatt taatgtcaga ctatfctta tttgcttata atgagaattt  
80461 cttaagtttt caaggtttga aatatcgttt ttttgcacag aaaaaagtt tttaaaaaaa  
80521 ttcaaatcaa gttttagata aaaaagtgc tcatlaagat agatgacata gcttagtggt  
80581 tttattctt ctttgttcag attaaaataa atcgcctta gttcttctaa gttttgtaaa  
80641 tattcttttc gggtaaggtt gttatagtag tatgtttgat tgtttatggt gcatttaaaa  
80701 ttaacttgat ttaaatfctgc attttgata aattttaaat cctcatcgct caactcatca  
80761 gtacacaaag cataagcagc gttgcaaata aaaaatgtaa aaaaacataa ttttaatact  
80821 ctttttaaaa atttatctct cattttctat ctttttaat ttgcaaagaa taagcaaac  
80881 aataccaatt aatttcctag cgagaaggat aattgccaat aagtaaagtg ctactataa  
80941 tccatatttg acaaaaaat atccaccaa aaatattata attaaaagca tattatctgg  
81001 aataagcaat aaatatccaa aagtatcata tatccagttt ataattttat tagaaacacc  
81061 atatttactt ttgcaatttt tgcattttat ttctaatttg cccgagaata tattccaat  
81121 attttgcaat ttattgattt ttgttttaca aacttcacat tctttataaa ggggcatttt  
81181 atttatccta tttttttctt tattattttc tatgactttt tatctttatc ttaaggcttc  
81241 ttgggttaatt tcatttgcat tcatcagcta tttccttgat tttatfctaa aaattattac  
81301 caagttcaaa taaatctggg attaaatatt tttcaaattc gctttctttg tattaagaa  
81361 tgattttttc tgaatttgtg gcaatatcta atagtttttt ttgtgtctaa tttacaagg  
81421 tctttatttg ttatcaagaa attacataca aaagtcgata ccatagaatg aaattccacc  
81481 ctagcttcaa aataaagatt tttatctaag gtatttatcc attctagcat atcattataa  
81541 tgctttaaaa attcaatata ttgttctatt tgtttttaac ttaaaaattt attatcaaaa  
81601 attctaagtg caaactccca agaaagattg gtaaaaataa ttttattttt atcaactaat  
81661 gcttgagat atatcttatc taaacctaaf aaagacatat gtaaaaaatc attcttagca  
81721 ttttgattat agattaataa ttttttatgt aagttattgt gcttttcttc ttgatttggt  
81781 ttaagataaa aatcattgta gtatttttta aattcttttt catcttcca agtttcatat  
81841 aaattttcca caacaattc tttttctttc ttttgataat acctatcca aaaaataagc  
81901 tctaaaggtc gttgtaaaaa atgataagct aagcttgtaa aaataattca aactataagt  
81961 acaccgcaag gtatataaaa tatttttaagt ttataaaaag gttttttcat aaaataataa  
82021 tccaagattt tttagaatt tagacaaaat ttactccatc acaagtcgca tgagggtgcaa  
82081 atctcacct tgtgagattt tatactctat actttcacat ttagggcact taaaaacatt  
82141 ttcttctaaa atacttgttt gatcgcattt taaacacaaa atttcaagcg gtgcaagctc  
82201 tataaaaagc tttgcatttt tgcaaagctc tgaattttcc ctaaaagttt caaaacaacg  
82261 ctaaaaagc tctacttcta taccgcttaa acgacctatt tttacataaa tctcttgac  
82321 gcttttagct ttatgagcaa aagcattttc ttcgcaaagt tcgattaaag actctactat  
82381 actaagctcg tgcattagca aattctcggg aaaagttcgc ccttaggagc ttctaaaaag  
82441 cgtttagctc cataagcatt ttctaaaatc acacgagctt ttttctcttc taaaacttct  
82501 cctatgatac tagcatttgc attgtatttt tttaaaattt ccaaagcctt tagttcatcc  
82561 tctttttcaa cgcaaagtat aaaagtgctc tcatttgcaa gttcaaaagc ctcatagcca  
82621 aaaagctcac aaagtcctaa aacctcatct tgtattttta tcttttcttc aaaaatcaaa  
82681 agatcattcc cgctttgctt tgcccattcg tttaaaactg cactaagctc cccacgctt

82741 gcatcacgca tagctacgac ttttataatct ttttcacaaa gctccaaaac ttccttattt  
82801 aaagccttgc agtcgctttt tataatctgct tctaattcat ttcttttgat caaaacacta  
82861 gccccgtgcc tgcccacatc acctgaaaca agtatgctaa gtcctgcttt gatattttta  
82921 ctctcttttt tagagatgat ttcacctaata gcagtggtgt tgatataaat ttcaccccc  
82981 ttgccttttg gcaccacttt agtatcgcca caaaccaact caacctcgca tttttcacac  
83041 tcttctttta tgctttttta aatgcgttca agtttttcta gctcaaagcc ctcttctaaa  
83101 ataagtccta agctaaggta ttttggtttt gccctacca ttaaacatc attaacagaa  
83161 ccgcaaacac aaagcttacc tatattttacc tcatcatcta aaaagatagg acttaagaca  
83221 aaagaatccg tgcttaaagc taaattttccc aaaatcgccg catcattgct ttcattttaa  
83281 attttattat caaagatcct aaaaagctta gttaaaagct cgttcatctc ttctccgcca  
83341 cccccatgag ctaaagaat atttttcatg cattcacctt tgagtattta taatacgccg  
83401 cacaagctcc ctgcctgaa accatacagc ttcctatagg gctttttgga gtacaggctt  
83461 taccaaaaac cttacaatca taaggctttg ccaaacctct taaaatttgt ccgcaaatc  
83521 aagccttact ttcactttta ctttgcactg cgcagtcaaa ttgcttgctc gcatcataag  
83581 cgctaaattc ttcttttaat tccaaaccac cctcttttat aagccctaaa ccacggaatt  
83641 caaaatcaca aacttgaaag ttttttttaa ccaaattttg tgctttttca ttgccttttt  
83701 cactcaccgc tcttttgat tgattaaana cttcgaaact gcctttattg atttgtctta  
83761 ctatatttaa aacgctttcc atgatatcca caggctcaaa accactcact gctatagggg  
83821 ttttaaactt agccgctaaa ggtttataaa tcccataacc tgtgatcaca ctcacatgag  
83881 aaggccctaa aaaggcattg atctttacat tttcatcatt cataatcgct tctacaggtg  
83941 ctggaactgt gatatgggtg atatgaaaaa agacattttt taaattttgc tctattactt  
84001 tttcaagaag taaagcactc ataggcgtag tagtttcaaa acctatggca aaaaagatga  
84061 tggttttggt taaattttgc tttagcaatat ccaaaacttc aagcggagaa taaagcgtc  
84121 ttacatccgc tccccttgct cttaaatcaa gcaaagaaat ttcacttctt ggaaccctta  
84181 aaagatctcc taaggtgcaa aaaatcgtat cttcataga agcaagttt atcgcagtat  
84241 caatgcgaac cttggcatc acacaaacag gacagcctgg cccatggatg aaattgatct  
84301 ctttaggcaa aatagaaggc aaagcgtatt tcataatact atgcgtatgc ccaccacaaa  
84361 tttccatgat attaatcggg gttttaattt cttgttctat aagctttttt aaggctaaaa  
84421 tattgtcttt atctctaaat tcatcgatga aattcattta aacctatc cccttcatcg  
84481 ctttgatct cgccactggt catcttttct actatttctt gatagggttt tatactttct  
84541 aaagcggctt ctttgtcgat tttttccatg gcaacaccta catggattaa aacataatca  
84601 cccttttgca aaggctcatc gatcaaatcc aaattcactt ttcttttaac acctagagtt  
84661 tgcaccaagg cattgttaag ctcatcgatt tctaaaattt cagaaggat agataaacac  
84721 attaaaaaag ctctttttg agtttaagta gtttatacca aagctccata ttggttccat  
84781 ttttagcatc aagagtgatg atatcagctc ttggactgag ttcttttatg agttttgtag  
84841 cttctttgat atcaaaatca aaatgatgag ccaaatccgc cttagtaatc aaaacaatat  
84901 ctgctttttt aaacatcaca ggatattttt gtggcttctc actgccttca gtcacagaaa  
84961 gtaagactac attttaaagc tcgcccaaat catagctcgc aggacaaact aaattccca  
85021 cattttctat aaaaagtaa tccactcctt tgatatctaa atgatgcaaa gcctcatgca  
85081 ccataaaagc atctaaatga cagctttgtc ctgtagtgat ttgatcagct aaagctccag  
85141 cattttttac tcttaaagcg tcgttattgg tttctaaatc cccttcaatc actgcgattt  
85201 taagttcggt tttcaaagcc ttgatcgtgc tttctaaaag cgtagttttt ccgcttctg  
85261 gagagctcat gagattgata caaagtgtat ttgcttcatt aaaatgcgcc ctattgtgct  
85321 tggcttcttc gtcattttta cttaaagatt tagaaattac ttctatgggt ttgctttctt  
85381 ttaggcttgg attttcatga tgatgatcat gatgatgaga atgctcatga gtatgagccg  
85441 aatttactga acagccaca tccttacaca tattatgttc cttttgaaag tttttcttg  
85501 attttatctt taaaagtatt aaattttaat gagttttaaa gatattatca gtctttttt  
85561 aaaaaatgca ccatttgtcc tagggctatg gagctatcat tgcaagggtt ttttaaagat  
85621 gcgagaaagt caaaattttt agctttttaa atttgaagta aggttttatt ttgaaaaact  
85681 ccaccctcta aaagcacttt taaatcataa gccttgctaa aagttataat caaatttggc  
85741 aaagcattaa acataccgtt aatagccttg cttttttcat cttttaaagc accctcaatg  
85801 agttctttta agttgatttc tccatcctta gaaaaaagct cgtaagaaaa gtctaaattt  
85861 tcatcataaa atgcttcgca catcagccca atttgtgctt cgtaagaaat tttttctata  
85921 tcaaaaacta tactcccaaa agcatcgata atgcgtccta aagaacttgt ttgaagtgta



85981 gagtgggtgt gaatTTTTTT aagatTTTca agTTTTatTT ttggaatTTT agataaaaaat  
86041 gtcttagcct catcttctaa atcataatgc caaatcaagc tcaaagctaa atTTTgtata  
86101 tTTTTatat cgctattaat aagggtgaaa tTTTcaaaat gcacgattct tTcgtattgt  
86161 tTTaaattcc ctataaaaaat ctcgccaccc caaatTTTTc catcatcgcc ataaccggtg  
86221 ccatcaaaga taaaacccaa agctTTTTca tctTTTTtaa attctTTTTc gtattcaaaa  
86281 taaagtgcgc aaaaatgtgc gtaatgggtgc tgaatTTTat aagtattgta aaattctTTT  
86341 gtatagctaa aattaggatg tttatcgcaa agtatttgat caaaacttaa atcataactt  
86401 tgtTTaaaaa aatcaagcaa agaaaaaaat ctctcataca catcaacact tTTTaaatcc  
86461 cctatataag gagaaatcaa aagTTTTatTT tcataaaaaa tcacaaattc gTTTTTaat  
86521 tcggagccca aagctaaaaa aactcctTTT ttatcgcttt taatttccaa ataagtcgga  
86581 tTTaaacccc ttgaagtgcg taaaaacata gTTTTTccat ttacaacttg agcaatgcta  
86641 tcatcgcttg gattgtgaat ttctcttgca tagtctagat aaaaatcaaa aacattgcca  
86701 agTTTTTTaa gcaaattatc ctcatctTTg ataatgcttt caccacttaa atTTTgcactt  
86761 gttgctacta aaaccccatc aaaatatcta aaaagtaaaa gatgcagtgg agtghtaagct  
86821 aacataatgc cgagtttatc tacatcaggg gcgattaaag aaaaggcttt tTtagctTTT  
86881 aaaatcacia taggagctaa aatagaacca agtagTTTTt ctTctctTTT atccacaaaa  
86941 caaagctctt tagcatcgct tatactctca cacattaagg caaagggttt tTtggggcgg  
87001 tTTTTtctaa gtcttaattc tTTtatggct tcaagattaa aggcatacaca catcaaatga  
87061 aatcccccca tgcTTTtgat agctaaaatt tTtctTgct tTaaaagctt agcacaggct  
87121 tTaaaagcct catcatcttg ggctagaatt tcaccctTTT tattTTTTaa aaaaacatcg  
87181 atTTTtactt gagggcaact tataggctgg gcatgaaaac gcctatTTTt aggatctTca  
87241 tattcacttt tgcaaaactc acacatTTTc aatgcttcca ttgtggtatt gcacctatca  
87301 taaggagat tTTTaatgat gctaaatctt ggcccacaat gcgtacaagt gataaaagga  
87361 tataaaaaac gcggatTTTT ttcatcaaaa aattctTTTT tgcaactctt acaaagtga  
87421 aatcactaa gcattggagt agTTTTtgta tTTTgcaaag aagtacctat gctaaaatgg  
87481 gtataatTTg tagtctgTTT ctctgtgata tcaatgctat ctatctTgca taaaggcggg  
87541 agcttctctt tgagTTTata gatgaaatgc tcgcattctt cTTTggtgca agcaaggatg  
87601 atTTtctacc caaaaccatc atTTTTtact tctccgcaaa gtcctaattc acaggcaagc  
87661 tcaaagacia gaggacgaaa gcctacgcct tgaacaagtc ctgaaatttg aagTTTatat  
87721 cctaagcggc acatcgctta actgacaatt tTtaagatgt tTtaagtat ttctaagcaa  
87781 agctTTatgc tcaaacaag atccactaat caacgccatt tcaactctgtt tTTTTctct  
87841 taagtcatca taagtatcgc gtaaaaaata agccaagctt tccacagctc cataagcgat  
87901 atTTgacta tctaccctg ctagcataaa gctcatagta gatctTaaagg tcctagtata  
87961 atcaaaactt ttatcttctt tcaaacgata atcaatctt actccgag gcatTTtaga  
88021 tTcgtctgcg atTTTTTaaa gTTTTtctcc tgcctTgtgt aaattTTcat ccaaattTaa  
88081 caccctacc accaagcaaa gTaaagaata aaaattgTTt tTaaagtTcaa aactctcatt  
88141 taaaagcggg aattctTTgg caaaatTTTc taaaagtctt gcgccgattt catctTTTtg  
88201 tatctctca taaagctctt tagaattTTT aggtaaagaa aggcaaagca aattgatctc  
88261 tttatTTgcg agcaataaat ctTcactc cttactaagc tctaacacia aagcctTTTc  
88321 tccataacga ctTaaaagat aagaaattct tgccatattt ttatcttctt tagaaaagat  
88381 aagctctctt gctctTgggt tgataaattc aaaaccctct aatactacta tTtgattatc  
88441 taaagtcgtg atataaaaaat cTTTTTgaaa ttctTTTatc tTTTaaacgc tTaaaaatTt  
88501 atactcattt tgccaaagct tTaatcctaa agcaaaagaa aacaatcct gcgctagcct  
88561 taactTaaat tcattTaaat caagatcgTg atTTTTtcta aatacagcgc tTaatcttag  
88621 ctTcatcaat ggtTTTTTcca aactcgcaag aagTTTTtaga tTTTcattTg aacaacaaa  
88681 gacagaattt atagctTTTga tatcgcaagg cattaaaaaa tcgcactcaa aatccctTTt  
88741 aaataaagaa atTTcataaa tgccctTTTt atcctTtaaa taaatactTT tTtctTTtag  
88801 caacaaatca aaagcagtgt tTaaatTTTt atcaaaatta tctTcattaa gactTTTgaaa  
88861 tTcgtTtaaa tcactTgaaa attcacactc gcaaaataca cccattcat tTTTactTaa  
88921 tTctTTTTTt tctTgataga gctTtgaatt gagataagta agataagtga aagggaaaaa  
88981 atctTTatcc tTtactTctt gctgatgaaa ttctcctgcc tTaaacTcaa atTTTTTcaa  
89041 aaaaatacta tgactcatag aatTTTaaaga atcacaaaaa gcctTTTaat tTtctTcgtc  
89101 cgcatcaatg ctaaaatgat atTTatctc ttgTTTTtct aaagtataac gataatTTTt  
89161 cgcaTaaaaa cgcagcaaat attcaaatat atcattatcc gcactataaa caaaatcaaa

89221 ttccaaagtc atattgtgcc ttttttgaaa aataaactat aaatatagca ttttttactt  
89281 aaaattcttt ttctctttgc ctaaaatcgc tcataaaaga atagataaaa tcataaaatt  
89341 ctttgctgtg gtttgggaat ttaatgtggc ttaattcatg taaaatcaca tattctatag  
89401 ctcttaagtt tttttctaaa agtcttaaat ttaagttgat atagcctttt ttatgattgc  
89461 aagatcccca acgctgtttc atttttttaa tactcaaagc agaataatgc aaatttgttt  
89521 ttttactcca ttttttaaga taaaaagaaa aaatgatttt tgcattttgt tttaaaaaat  
89581 tatccaaatc ttctcttgaa gcactttgaa tttcacctt tgaaattcgc gtttttttaa  
89641 agctttcatc taaatttaaa atatatTTTT tacctaaaaa atatatTTca ttttcgctaa  
89701 tccttgcttt tttgctttga aaattaagat aagttttttg tatccaaatt tcatttttat  
89761 ataaaaattc ttttgctttt tctagcggat aaaattgagg gatacttaaa tgaaattcgc  
89821 ctttttcatt gagcttttaa cgcaaggttt taatgttttt gatttgatag aaaaaatccc  
89881 tatttaagta acgaaaactt tttacactag agctttgcct tgccatttct tactcttcca  
89941 tctataagca tttacaagcc ctcttaagaa ctcatctgca caaaaacctt tccatacccc  
90001 caaaattcca agcccaaaat gaaaacaaag cacatagcct actggcaaag aaacacccat  
90061 cataaaaaca agtccgctaa aaaatgggaa tttcgcactt ccgcttgctc ttagggcatt  
90121 gaccatgact atattaaaag tgcgtgaaat ttcaagaaaa atagaaaagcg taaataaagg  
90181 aagcataagc tctctaagct caggttttta atcaagcaag tccatggtaa aatctttgaa  
90241 aacaaaattt aaaaccgcca caaaagcact ggccatcacg ctcaaataca aggcattcca  
90301 agcgtgcttg taggcgatat tttggtattt tgcaccact aatttaccba cgatgatttc  
90361 atttgctatg ctgattgctt gtccaataag catgataagc attgaaattt gaaaataaat  
90421 cgtttgcacg ctatcattgt ttgatccaag ttttgccaca aaagaaaaag cgataaaata  
90481 ctgactatc caaagcaaat tttctcccgc tgaaaaaccg cctatgttta aaactttttt  
90541 caccacagct ttttcaagcc ttatcatttc ttgaatttta agatgaattt ttaatttata  
90601 aaaaagtatg ataagcaaag cagctactgc taaaaacgc gcaacaagat tgctaagccc  
90661 tactcctaaa agctcgcttt gagtaaaatg cagggcgtaa aaattgccta taatgactat  
90721 gatatccatc aaaaagccta taacataac ccaataagcc atattataaa ccctgataat  
90781 agcagccaat acaatcccca aagcatcaaa aaacaaacaa attcctagca ttcttagata  
90841 gataatgcca tcttgtaatt tttcttcagg gatattagca agcctaagca aaagctctcc  
90901 ttgccatagc ataaacaccg cgcaacaaa acccaagagc gcatttaaaa acaagctttg  
90961 atgtatcact tttcttgcta agactaaatc ctttgctcct atggcttgag cgatcacaac  
91021 actacaacc acacttaaaa aactaaaaat cgtgataaac aaatcagcga ttaattccc  
91081 cgctcccata gcaccacaa ggggaatttga ataatgcaa accatagcag tattgatgat  
91141 gatagtaagg tattttgaaa gcaaatccca aaaaatagga aactgagtt ttgttaggga  
91201 aagttgtttt tttgcatga ttattctttt aaaaatatta aaatctaaga ttataacaaa  
91261 attaacctaa tttagacaaa ttttatactc aaagatgagc taaaatttaa aaagaaaaaa  
91321 ggcatgttg tatcttttct ggcttaaaaa tttattttta tagtgatgat tttataataa  
91381 ttttttaaga attttatgaa tgattttttt aaacgctatg ataataatgt caacattttt  
91441 gaaattttgt atatagtcca tagataaatt tacgaatatt tatcttattt acacttgaaa  
91501 cacctcgatc ttgacattgt tttagaataa gtaaagactg ctttaacctt tatattaaga  
91561 caatctttat tttataatat tcttaatata aatattacat gtttatgatt cataccatgt  
91621 tggctcttct atattttgtac cttctacaat atagtaatta tcaacatcta ttgcattaag  
91681 tcgccagctt ttaaggctgt atgtataagc ttttgcttca tgtaaaaaat agcttaaatc  
91741 ttctatactt tttatattcc agctgcttat atcttgatta aagctttttac tttcagaaaa  
91801 catagcatgc atagtttcta ctttgatac atcccagtca ctaagtgggt gggttaaattt  
91861 ctgattttct tcaaacatgc cagtcatatc ttttatttta gatgtatccc attcattaag  
91921 tgggtgaatta aaagattttg cctcactaaa catatatgct aatgatgttg tgcctgttat  
91981 atcccacca ttaagaggct gggttaaaatc ttctgtttct tcaaacatat atgaaaaatt  
92041 tttaacatgt gatacattcc atgagctgat attttgatta aatcttttgc ttgatctaaa  
92101 cattgacgcc atattttgtaa ctttgcctgt atcccattt tcaagaggct gggttaaattt  
92161 ttttgataaa aaaaacatac cattcatatt tttcacatta gatacattcc agttattaat  
92221 attttgatta aaactttctg cattagaaaa catatgattc atatctttta cttttgatgt  
92281 gttccataag ccaatatctt gattaaattt taaagctcta taaaacatat aatgcatact  
92341 ttctacacgg cttgtatccc acttatcaag aggctgatta aaatcttctg cacaataaaa  
92401 catagagctc aaatctttta cattagatat attccagtca ttttatattt gggttaaaagg

92461 tgtatTTTTGG aacataccgt ccatatatgc tactTTTTgat gtatcccaca tactaatatc  
92521 ctggttcata ttgctatatg caaacatatt gctcatatTT accacatggc ttgtattcca  
92581 tgattctatg ccactgaaat ctctttcaca gtgtagaaat attaatgata aatcattaat  
92641 attagatata tcaacatcag caagatttat atTTTTatct tttgcaagta atattaattc  
92701 cagTTTTgta ttaggcttat acttaccatt ttctTTTTta catggcatga gccatttagg  
92761 cttagtaggg cagTTTTcat ataaagcata gttacataaa ttttcatgat ctatgaactt  
92821 atatTTTTtt gcattagtag ccctgtaatc tttatTTtatg ctgcttacat cccagttatc  
92881 tatatTTTTgt ttaaactttt ttgccccatg aaacatatcc accatacata atacattaga  
92941 tgtatcccac gcacttatgt tctgattaaa atcttctgct tccaaaaaca tatagctcat  
93001 gtTTaataca tttgatgtat tccagctgcc tatatcagta ttaaagccaa ttgattggga  
93061 aaacataata cccatatcac ttacattgga agtatccata ttgcttatcc agtcaaataa  
93121 agggctgtcg cttttaattt tactaaaatt aaactTTTca aacattctgt tcatatTTac  
93181 cacatgggtt gtatcccAAA gttctatgcc accaaaatct gttcttatta catctgtaaa  
93241 taattctgaa aaatctTTaa tatttgaaat atcaatatca cctaaatact gcctTTTctt  
93301 attcattagc tttataagtt ctctTTTatt tttagggtga attatTTcac ctttactTTt  
93361 aagaggatta gTTTTtctat taaacatggg atttataata gtatcaagct tttgccctt  
93421 agcatatctt gaaacaattc tataaatata atcctgatct gaatTTTTtag cagtgcagcc  
93481 agcataaaaa gctttatcat cagcatattc tatttctaaa ctttctaaaa atccataagc  
93541 tatatcaact atttccttat ctacttctgc cccatctcta atggcttggga taactccatt  
93601 aacctcttga cttcaatag caaatattag ctttctacac aattctTTTT tactcatttt  
93661 gtttctccaa atatTTaaaa aatttccgag taacaaaatt atatactata aataataatt  
93721 ttaatacaat aaaaaataac actattataa acacatcaaa acaataaatt tttaaatttc  
93781 aaatTTtaag tttatTTtat ttttcaaaaa atagggattt aaatTTtatat tattttatct  
93841 ttagaaaaag gaaagagaaa tttatcttac tctctcctat tttataaaaa agtctttgtc  
93901 aaataagatt tatagatggg ataaaaaatt taatattaaa aatctcacc aaaagcacca  
93961 cttaaataag ctttggtttt ttcttgcttt ggatTTTcaa aaaattcctt actttcccca  
94021 aattctataa gctctccaag gtgaaaaaat gctgtataat cagccacgcg tttgccttgt  
94081 tgcataattgt gcgtaaccat gatcatagaa agattatggc ttaattcttt taaaagctct  
94141 tcaatcacgc ctgaacttat aggatcaagt gcagaagttg gctcatctaa aagcaaaagt  
94201 ttaggtttga tcgctaaagc tcttgcgata caaaggcggt gttgttgtcc gcctgaaaga  
94261 gctagagcat tttgcttgag cttgtcttta acttcttcaa aaagccctac tttttgcaaa  
94321 caatccacca ccaaagcttc ttctcatcc ttgctTTTaa tcataccatg aagttttgga  
94381 gcataagaga tattttcata aatgctTTTt acaaaaacat tagcttgttg aaaaaccata  
94441 ccgacatttt tacgcaaaac tactacatct tgatTTTTta catctTTTcc ttctatttct  
94501 actaaacat cgatTTTTgc gatTTTgtca ttcattctgt taaaacaacg caaaaaggta  
94561 gatTTTccac atcctgaagc accgattaat gcagtgattt tattttgctc gatttgcata  
94621 ttgatatcaa ataaagcttg tttttttcca taaaataaat ttaaatttgt tgtttttgct  
94681 atcactTTaa ttttcttga aaatattttc ttaataaaac cgcactTaaa tttagcacca  
94741 ccaaaagccc taaaagcacg atgatacccg ctgcagttct ttctaaaaac gcacgctctg  
94801 gcatagccga ccatgaataa atttgagcag gtaaaacgct agttgcatca agcactgaac  
94861 ttgctacatc agggataaaa gctatcacac cgataatcat caaaggtgca gtctcaccta  
94921 tggctcctgc taaagtaagg atagaacctg ttaaaatcat aggcatagcc aaaggaagca  
94981 tgatgccctt taccatttgc acctttgtca taccCAAagc ataggcagca ttttcatgt  
95041 tgatatccac gTTTTTtaa gctgctttgg ttgaaactat gatgataggc aagctcatga  
95101 tcgctaaagt aagcccgctt accaaagcac ttgaaacgcg cattccaaa agattgataa  
95161 acacgccaag tcctaaaagt ccaataaaaa tactaggaat gcttgcaaga ttgttaatac  
95221 acacttctat aaaatgtgta aataaatttt gcggtgcaaa ttcttccaag taaatcgctg  
95281 ctgcaactcc tactggaaca cttactgcca tacacacaag cataacaagc aaagttccta  
95341 cagccgaaga taaaattcct gaatTTTcag gcgattttga atccccattt aaaaagaat  
95401 tcgtattaaa acgaagtgtt atttcatctt tttgtacaag attatcaacc aaagctcttt  
95461 gctcttcatt taagcggttg taatTTTgtt tcatatactg atccacttct gaatttgcta  
95521 aaagccatga tttttcagtg atttgtcctg ttcttatctt tctttgctct gcacgcgata  
95581 aaagctcata agcaggcgaa tttctatccg cttccacata aatataagtt tgctTaaacg  
95641 ccccaattcc aagatatgcc acacttctta aaaagataca aagaaaaatg agattgatat

95701 aaagtcccat tttacaaagt cttttaaaag actttgaggc tttttgtcgt tttttgaaaa  
95761 gctttttcat aaatTTTTcc ttttTgtgaaa gcggttgata agataaacgc taaacatatt  
95821 gatgattaaa gtgatgatga aaagcaccaa acctaaagaa aaggcactta aagctaaaga  
95881 actatcaaaa gcttgatccc cacttaatgc ttctacgata ttaaccgtaa ccgttgtcat  
95941 atcttctaag aaattcattg tcaaatttgg acgcaaagaa gctgccatta ccactatcat  
96001 ggtttcaccc aaagcccttg aaagccctaa aagacaagct gctactatac ctggaatagc  
96061 ctcaaggtaaa atcacagcaa aaaccacttc tttttttgtc atcccccagg cataagctcc  
96121 gttaatcctt ttttTactca cagcttcgat acaatcttgc gacaaagaag ccactatagg  
96181 cactatcatg atccccatga taaatcccgc acctaaagca ctttgaaaaac tcgcctgtat  
96241 accaaacaaa gaaaaaac atactataaa aggtgctacg attatagctg caaaaaatcc  
96301 aaaaacaaca gtaggaatcc ctgcgataac ttctaggata ggcttgagggt agtttttaga  
96361 ttttttaccg gcaaaaacac ccaaatatat agcacacatt acccccagg gtagagctgt  
96421 tagcatggcg attaaagaga tataaaaagt tccccaaaa agcgacactg caccaaaaac  
96481 cccttgcttg ctctgTccat ctgcattcat aaaagctgca tcagccgcc attcgcttga  
96541 aaataaaaa gtacttatgc tttctttttg aaagaatTTT aaagcttcaa tTaaaatcgt  
96601 tagcatgatg gcaaagctta ccaccacact aacaaaagcg cataagaaaa gtataaatTT  
96661 aattatTTTT tcttttagca aagTTTTTcc tTaaaatact tttccagctt ttacaagctc  
96721 atcggttaag atTTTTctat ctTctatatg tttttgagaa gctttTaaaa gctcattatt  
96781 taaaggaaca agccctattt tctcaagctc tctccactt tttgctaaat catcactcat  
96841 ataaatTTTT gcaaatTcaa aggcttcttt agggTTTTTc tttgcttaa tatagataaa  
96901 caaacttctt gcaagatcgt atTTTccatc agcaatattt ttttcatctg cttttatacc  
96961 atcgatatct gctgcattga ttttatccac attgcttact aaaaatccat aaccaaaaag  
97021 tccaaaagca tctttatcga tagtaagttt tgaaacgatt agattatcat tttcaccact  
97081 tgggatataa gctccatctt ggcgatgggt tttatactcg cttttgtatt caggaatTTT  
97141 tttagaaata tcaTcatta caagctctt tacggtatct ctTgtacctg agcttgatgg  
97201 aggaccataa acgctgattt tacgattagg taaatTTTTa ttgatttgat tccagtttTg  
97261 ataaggattt gggacaagtt tgccaccttg cggaacctct ttagctagag ctaggaaaag  
97321 ttctTTTTTa gtgatgtTta aaggtgtgtt ggctttattt tgcgctaaaa ctataccatc  
97381 ataactacc ataatcccta ctatatcagt aactcccgt tttttgcaag tttcaaatc  
97441 actaaatTtC atcgctcttg aagcattaga aatatcagtt atgccctgc aaaatacttt  
97501 aatccacc cctgtTccta aactctctac gataggagtt tttgtattgt gaatcgctgc  
97561 atactcttca gctacaaaag aagtaaatgg atacacagtt gatgaacctg cgattttTaa  
97621 atcagccgca ctTaaagcac ccgctaaagc aaaacttgca acactTaaag ctagaatTTT  
97681 tttcattttt tctccttact tttaaaaaag taacggaagt ttaggaaaag tgggaaacat  
97741 tttgaaaca tttttttTac ttcgcaacgg aaataaatc cgtcttgca caaaggactt  
97801 agtccttttg aaacctctaa aggcacgcc acctaaaaat ctttgagat tttcagcctt  
97861 tttaaaattc tatctcataa caaaatataa attatttcat ttagaaacat tttattttTa  
97921 ttttatatat tttgatttca atcctTtaaa aatttatttt gttTtaaaaa aatcaatata  
97981 tcattttTaa aacattctaa aaaataaaaa caaggagata gaatgctttc aaaaaagta  
98041 gttgatttat taaacgagca aatcaataaa gaaatgtatg cagctaattt atatctaagt  
98101 atgagttctt ggtgctatga aaatagtctt gatggagctg gactctttct ttttcaacac  
98161 gcaagcgaag aaagtgaaca cgcaagaaaa ctTataactt atctTaatga aacagattca  
98221 catgtagagc tTaaagaagt taagcaacct gaacaaaatt tcaaatcttt acttgatgtt  
98281 tttgaaaaaa ctTacgagca tgaacaaagc attacaaaat ctattaatga tcttTtagag  
98341 cacatgttag ccaataaaga ttattctact tTtaatTTTc ttcaatggta tgtgagcgaa  
98401 caacacgaag aagaagcact tttccgtgggt atagtagaca aaatcaaaact catcagtgat  
98461 aatggaaacg gcttTtatct agctgatcaa tatatcaaaa atttagcctt gtctaaaaaa  
98521 taatatTTTT gcctTgaaaa aggcaaaatt acaatttcat cttaggtagc gtatgactta  
98581 ttttctTTa gaatttagca tttTaatgat tgtatTTTTt gccatatatt gggcattTaa  
98641 agataattat aaaatacaaa atattttTaat cttagctttt tcatatctTta tttatatact  
98701 gattaatcct tattttTgctt taattttatt tatttatact tttttTatac atttttTcgc  
98761 ctTacttatc tttgtgcgtc gTaaacgata tatctttgct acttTgtctaa cttttTaat  
98821 attaaatTTa tgtttttTca aatattttcc aaacatcaaa ggaagtctTg atcaagtgcT  
98881 aagctTTTTg gggctTgatt tttTaaatT tgaacttatc ttacctatag gtattagttt

98941 ttatactttt gcttctatta cttatcttgt agatgtatat aaaaaacacc atttagaaag  
99001 ctttttaa at ttagcaacct ttttatcatt tttccctacc ctacttgcag gaccgattat  
99061 gcgtagtgcg ttttttttcg aacaagctta tcaaaaacgc gaatttaaac atgcaaat  
99121 gatcatcatt ttgcttattt ttggtatagt taaaaaagtt cttattgcta attacttagg  
99181 aatttatgct aaaaatattt tagattttcc tcaatcttat aatttcatac aacttttaag  
99241 tgcaatttat gcttatgcgg tgcaaatata ttgcgatttt agtggatatg tagatctagt  
99301 ttgcgctttt gctttaatgc taggttttac tctaccaccg aattttaata tgccttattt  
99361 agcaaaaaat cttaaagaat tttgggctag atggcatatc agcctttcaa ctttcataag  
99421 ggattatatac tatattcctt taggaggcaa tagaaaagga atgcctcgca ccatagccaa  
99481 tatactcatc gcttttatcc tttcgggctt atggcatgga agtacttttag cttttggact  
99541 ttggggatta ttgcatggat taggtattgt atttatccac ttgcttgcct taaccaaat  
99601 cagccttcaa aaaattccag ctttaggaag atttttaacc tttcaatttg tatgttttac  
99661 ttggattttc ttttattata ataaaaattt agaagatgct ttagaatact tcaaagcttg  
99721 ctataataac tttttccaaa ttcctagcta taatgatatac tatatgcttg taagttttgc  
99781 tgtgcttttt atgatttatc ctttatttgt caattttaga gaatatttg taaagatttt  
99841 aatctttacg ccgtttttat taaagccgtt tgtaatcact tttattttgc ttttgggtgt  
99901 tgcttttatg ccaaatggta ttcctgattt tatttattcg agtttttaaa tgaatattat  
99961 tagatttttc tttattttta ttatagtgtt tatacttgtt tgccttgtga tgaatcaaag  
100021 cattttttct tatatcgagc aaaaatatca ctttgcattt tctcctaaaa acgatatttt  
100081 acaagaggcc aatggtttta aaaataaact agaacaaatc cgtgcaatac taagcaatga  
100141 gccctgcct caaaatatag aagaaaatat catggttcaa gaagatatgg atgaacttaa  
100201 tgcaagtaat gattttatcg ataaaaacac caccattgaa gatatacagc aaacagaaga  
100261 tgaanaatgct agttttattg acaataccaa gctagaaatt cacaaaggtg atgaattttt  
100321 atttataggt gattctttta tgcaagggtg ggcaatcgca cttaatcgcg attttaattga  
100381 tctaggttta aaagctaag atccttagcaa gcaaaaataca ggactttctt ataaatctta  
100441 tttgactgg gcaaaagcga ccaagaagc ttttgcaaaa aatcctaaca ttaaatactt  
100501 cgtcgtccta gttggagcaa atgatccttg ggatattaaa aaaggtgggg tttatcatcg  
100561 ctttggttcg gatagctgga ttgatatac cacttataga gtaaataaaa tcatcaatat  
100621 agccaacaa cataatgcaa aaattctttg gtttgaagtc cctcctgtta aaaaagatga  
100681 gctcaatgaa aaaatacaaa ttctaataaa aatttacagc gaagaaattc taaaaacaa  
100741 gcaaattttt atcaatacaa aattattttt tagcgtcaat gatgaatttt caacctatat  
100801 caaaaacgaa aacaacaaaa gtgtaaaaaat gagaacagat gatggaattc attttacc  
100861 aatggcgca aaagagatgt caaaactctt gctcgaacat ataacaatca aggaagaaaa  
100921 tgcaaatata gcaatttaaa gctatattat taatccttat attttcaatc aatttatacg  
100981 caacaacac aaacaatatac atagatgaaa ttttaaatca aacaaaaaat caaagcgtt  
101041 tgagtaatta tgcttctaaa aaagatttaa agattttaga acaaaaactc aaagatcaaa  
101101 aaaatatagg cattagaatt tatggagatt ctcacacggc agcagatttt tttccgctg  
101161 ttatttagagg atatttaatc aatcaaat ccataggctt tgcttatcct ttacaaccta  
101221 aatatcaaca aaacttaaat cttgattatt cttataaaaa ttatgaaatt ttaaactcaa  
101281 gaaatacaga caccgcaggt attgattttc ctttaggtgg gataatagcc aaagctaaag  
101341 aaaaaggtgc aaaaatcact cttgatacca attttagaca aaaaaaattt aaagtaggtt  
101401 ttgtctttaa ggctcaaaat aacaccaatg ctttagtat taaagatgct caaaacaaaa  
101461 gttatgagtt aagatcagtg gctaataaat ggtcatataa agaatacga cttgtttttc  
101521 ctttgcaaat ttctgctcta caaaaaaacg ctcaattggg aggatatttt atcaccagca  
101581 aagaagataa tgcctattta gataccatag cgatcaatgg ggcaaaaagt gatctttgga  
101641 tgtcgtggaa taaaaaagta agcgagcaag aattaaact cctatcta at gatttaatct  
101701 tgcttgctta tggttcta at gacgcacttt ttaagggtt tgaaaaaaat aaatttaaaa  
101761 agaatttaaa agattggatt cgcacactca aaacttataa caaaaacgcc cttatcatgc  
101821 ttgtttctcc tctactgtg gtaaaaaaac aaggtaaaaa ctataacctata gctcctgatt  
101881 tttttgctat aaggcaagca ctttatgagg tagccaagga agaaaaaact cttctttttg  
101941 acatgcacca attcattgcaa gatagtgggt gaaaaaacia atggatagaa caaaagctct  
102001 ccttgcaaga tgtacattta accattaaag gctatgaatt aatggctaaa aaattgcttg  
102061 atgatttaaa aaaaatagtgt cattattgat ttttaattta tcaatataat ttaaaaaagc  
102121 cttatttgc t gatattttt agcagaagc atataaaatt aaggcatttc caaatgggtt

102181 tcatcatagc ttaaagctgt gatttgataa taagaattga tggttttaag aagattaaac  
102241 ctagcttcta acaaactttg ttttagtgaa tttaaagtat tagaagcadc taaataatct  
102301 ttttaattcac ttttacccaa atttatatatt tcccaataag cttgagtaat cagctcttgt  
102361 ttaaagctag tatcttttaa aatttgaagc aacatagtat tgctttgata gtctttataa  
102421 tttaaagcaa attcattcat agcactttgc aaactctgct cataagtaat aagtgtactc  
102481 tcataatcaa actgcgaaat tttgatattt tgctttactc tgccatagtc taagaaaggc  
102541 aaagaaatth ttatattacc actaagaact tcaaatttaa aactatcadc aaattgttta  
102601 tcactacatc ttaaagcccc atttagagaa atgcttgaca agattgattt ttgcaccgaa  
102661 gcatagtctt taaaagcgga ttttaaggta ttgagcttag aacgcacadc aggacgatac  
102721 acaagagctt ctaaagggat gttaaaatta ggatttaaat tcttaaaadc agaaagagtt  
102781 aaagctttta aataatcaat ataagcaaaa ccctcttgct tgcctatcaa atctttaga  
102841 tttttataa gtaaattgca attttgctca ttgcgtaata aattctgttt tgctcttaat  
102901 aaattttgct cgatattaag caaatcaagt tcttcgattt ttccaagctc aaatttataa  
102961 gcatagagct ctctcatttg ttctaaatta gctagatact ctttaagtaa attatccaca  
103021 tcattaaaat aagcaagttc aaaaacacca tttaaagctg tattaatcat actgattttt  
103081 aaattttcta gatcataagc actagccttt gcaactgaatt cactcgcact tgagctatcc  
103141 cttatctttc cataaatgct aagctcatag cttaaattta agctattatt aaaattctta  
103201 ctttgactc cggaatttaa cttcttatct ccaccaagcc ccaaatttgc acttaaagtc  
103261 ggatacaaat cataatctat caaatcagcc cttgctaaag ctgcaagcaa agtacttcta  
103321 gctgtattta tatcgctatt gtttaacaaa acaaaattta aaattcatt caatttagca  
103381 ttatcgtaag cttgtacca atcataagtg atatttaagt ctttaaagct ctctcgctc  
103441 attgttgctt ctttaggtaa gctaagtttt actccacagg cgcttaaaaa aaatgctagt  
103501 aaaatactca ataaattttt cattttattc ctttgataag gcgctgatag gatttaaatt  
103561 ggctgcattt cttgcagga aaaaaccaa aacaaccccg attaaaacag aactcaatag  
103621 ccccaaaagc acagaatagc catttaaac cataggaaaa tcagtgccta aggtattaaa  
103681 accaaaaatc acaaaaatag aaagcaaac tcctaaaadc gcaccatag agcatatcat  
103741 caccgcttcg atcaaaaact gcatcatgat atcttctctt ctagcgccta ttgccatagc  
103801 aattcctatt tctcttgctt tttcactcac tgaacaagc atgatattca tcacgcctat  
103861 acctcaaca atcaaagcaa tcaccgccac cgaagcagta agtatagttg tctgtcgttt  
103921 atttgccgtg atagcttgct tgaagatctc agaattaaaa gtaaaaaaat ccctctgtcc  
103981 gcgtttgatc tctaaaattc taataatggc attttcagcc aaggtagagc tcacatcgtc  
104041 ttttactttt actataatth cagcaaat tctatcacc gtaagcttat tcatcagttg  
104101 agtataaggc atataaaggc gtactacatt atcttctatg ggtttttctg tgtctttttg  
104161 taaaactcct atgattttta aggtttgaga attaaaaaat accacacgcc ctaaaacatc  
104221 ttcgctcttt tgatgaggaa aaagatttct cttagcatta aagtcaagca ccgctacatt  
104281 agcattagtt tctatatctt cattatttaa aattctcca acttgaagct ttaaaccctc  
104341 tatggcaaaa ttattcacc ctactccctc agctctagcg cttaaagaaa tgttagtata  
104401 agttgctacg cctgaagtat tagagtgcgc atctaccgct tctaaataat ctaaacttct  
104461 aagtgtttct aagtcgctaa aattaagcct tgttttgctt gaacgcaaat ccccaaaacc  
104521 tttaccaggg cggatttcaa tggatttggg tccaagtctt gcgatggatt ctaaaacctt  
104581 agcttgagag ccaagcccta aggccaccac gcacacaacc gaagctatac ctatgatgat  
104641 ccctagcatg gttaaaatag aacgaagttt atgtgcaagt atggaagaat aagctatttt  
104701 taacattca aaggcttgat ttttaacaaa ggtaaaagtt ttttctctt ttggcactat  
104761 tttaacctgt cttgatagg caaacttatc ttttttgcta tcaactaaaa tctctccatc  
104821 tttgatttct atcactcttt tagcctgtgc tgctatcttt ggatcgtgcg ttacaagtac  
104881 tatggatgct cttgtgcgt ttaatttttt taaaatttca agcaccataa taccgctttt  
104941 actatctaaa gctcctgttg gctcatcggc taaaataagc tctccaccat tcatcaaagc  
105001 tctagctata gaaacacgct gttgctgtcc tccacttagc tcattaggct ttgattctat  
105061 cttgtgctca agctctaaat ttcctaaaag ttcttgagct ctaaaatttc tttcttgcac  
105121 tttttaccg gcataaacag caggtaatgt gacattgtca tttgcgctta gaagatttaa  
105181 aagattgtag cgttgaaaaa taaagcctat ttttctcgt cttaatctcg cttttctgct  
105241 gctattgagc tgggtaactt cataattatc aaaaatataa ctccattgct ttggctcatc  
105301 taaggttctt atgatattta aaagcgaagt ttttccactc ccactttgcc ctatgatagc  
105361 gacaaattcg ctttttctt tacttaaac tacatttttt aatatggcat tctgcctat

105421 atttttacaa atattgttta aaaaaatcat caaaatctca atcttaactt aggagcagca  
105481 ctatcgccac ttgaacttac tatcagtaat tcatcctcgc ttaaaccctt taaaatttga  
105541 gtatttacag aatctttaat gcctaattta acatattttt ttactgcttt ttgaccttgc  
105601 aaaatttcaa cataataccc ttttgcatac tttttaatcg tataagtagg cacagcaata  
105661 acatctttaa cacttgctac aacaatttca ttttgtatac tcataccaat acgcaaaaaa  
105721 tcatctttat ttgccacata aaatttagca taataatata tagcattggt agaacttgaa  
105781 cttgaagaac tagagcttga agaagaagta gaattggtac ttgaatcgct tatttgagta  
105841 tctgcaggat ctatacttgc tatacttgc t gataagttt tttgaggatc gctaagcaaa  
105901 gaaaaatcaa gttctgtgcc gatttttatc ttaccaacat ccgcttcggc tatctccatt  
105961 cttacttcca tttgatctaa attagctatg cggactatgg ttgggggtgtt ttgattggca  
106021 tttacagttt gtccttcatc gactgctaca ttgatcacia ctccatcaat aggcgcagtg  
106081 atggttgtat atcctaaatc tttttgagca tttttaagag tgatttcaag ctgaactact  
106141 tgagcattaa gctctgcaac atttgccttt aaagtgtaaa aattattttt ttgagtttct  
106201 aaattttcaa gagaacttgc cttagcagca taaagttttt gttctctttg gtattgttta  
106261 cttgcgattt caagggcgac ttttttactt tctaaattgg ccttagcact ttcaagctgc  
106321 gcctttgtga tatctaaatc attttgctgt ttatctttat caatttgtgc gatcaaatca  
106381 cttgttttta catacgaacc cacatccaca taaagcttga tgatttggcc gctcacttga  
106441 gcaccacat caacttgatc ttttagcataa actttcccta ccgcttctat ggtttgagaa  
106501 atatttattt ttttaacctt ttgggtgaga taattgattt tttcaccatt attgaaaaat  
106561 acaaaataag caccactcc aaaaagcgtc aaaatcacta caatcaaac gatcttattt  
106621 ttcactctaa gccttaaacc aaaaaaata aatcttagaa ttctacttgg gcaagttaa  
106681 tttttgtga atttttta tcatTTTTTTT agaatttaa aattctaaag ccatcact  
106741 atcaccttgc attaaagactt ttaaattttc atcttccag caaaaagtag agctatgggtg  
106801 caaggtaggg tttttcaaat cttttgaaat acccaciaaa acataagcgc ccattctctc  
106861 acgctttaa aaagcaaat cctcagcccc catatcaggc ttagctacgc taatgatatt  
106921 ttgctcgcct aataccttgc taaaagcttt tctagctatt tttgcagcat tttcatcatt  
106981 gatcaaagga ggatattctc ttttataatc aagcttaaaa tcaccccaa attccaaagc  
107041 aacagctttg gctgtatttt ctatggagct ttgtaaaagt ttttgatttt catcgcttaa  
107101 aaaacgcact gttccttga agatagcatt ttgtgggatc acattaaaag tcgttcttgc  
107161 atgaaatttt cctatgggtga taacccccgc atccacaggc cttaaagcct ttgaaatgat  
107221 acattgcaca tcgctgacaa atttgctcgc catgactata ggatcgatag ttgtatgagg  
107281 gtgtgctcca tgtccgcctt ttctataaa ttcaagatca aaaacatcaa cccccccat  
107341 catctaccg cttacaattt gagcagtatt ttcaagcaaa ggccccata aatggcatcc  
107401 aaaaaccgca tctacatggg gattttcaag tatgcccgct tctatcatag gcttagcacc  
107461 cccacttctc tcttcagcag gctgaaacat aaatttaatc gttccgctaa attcatctct  
107521 tagctcattt aagatcaaaa ccgctcccaa aagccctgct gtgtgtccat cgtgaccaca  
107581 tgcgtgcatt tttccattga tttttgaagc ataactaaga tttgtttgct cttgcacagg  
107641 caaagcgtcc atatccgctc ttaaaagcac gcattgaggt ttttttagtgc tttgtttttt  
107701 tccttctatg cttgctaaaa ttccggtttt agctatattt ttttcatatt taatacaaaa  
107761 ttcactctaa atttgcaca ccaatcttgc tgtattttc tcttcaaat caagctcagg  
107821 gtgcatatga atttgatgtc ttaaattgac aattttttca tagtatttat cacttaaatt  
107881 tttacgcgc tctaacatag ttttagtcca aatcctttat tttttcatct gcttttttat  
107941 tgtctatttt ttctaaattt gcttccattt tgcgaatttc ttcttcgccc cttcttacta  
108001 attcttgcac aatttttgaa aaatctcaa tttttttatc cgcataatcc acttttgaca  
108061 atataaacg caacaaatta agccttgcct ttttcttatc atctgaagaa atgatagtc  
108121 atggacagg tgggttatta gatgctaaaa gcatagaata ctttgccaag gtatatttat  
108181 cccataattc ttgagatttt tgatccacag gagaaagttt gtattgcttt aaagggtcaa  
108241 tgcggcgttt ttcaaagcgt cttttttgct cctctttaga aacagaaaaa taaaatttaa  
108301 aaaacatcaa attgctattt gaaatcatat tttcaaaca aggcacctct cttaaaaagt  
108361 ctttatgctg ctgtggggta caaaaacca tcacaggctc tactcctcgc cggttatacc  
108421 atgatctatc aaagatcaca atctcaccg ctgaaggcaa atgcgtcaca tagcgttgaa  
108481 aataccattg tgttttttca acatcattag gcttttcaag tgctaccaca cgacatcccc  
108541 taggatttag atactctatc aaacgcttga tgcaccacc cttgcctgct gcatcgcgtc  
108601 cttctataag tataagcact tttaaacctt ttgcttttac ataattttga aattttaaaa

108661 gctcgatttg caaatTTTTT aaatcTTTTT catattctat agtgctTTTT ttcttcttga  
108721 tagaaacata aatttcatct ttttttgtat cctcttgaat ttttgccgga acttttctt  
108781 gcataagcaa cttttataaa atatttaaag caaatTTacc ataacaact ataattcaca  
108841 ttaaaatcat aaatTTTaca cttgagTTta ggataataat gcgTTTTatt tttacacttt  
108901 tatttagctg ttatTTTTta tttgcttctg ttttatcttt aaatgaagcc tttgaagtaa  
108961 aatcgagttc ttatgatagc gctgtatcaa tcatatata attgggaaaa gatatttatc  
109021 tttattctga taaactcaaa ctctatatta atcaaaacga tatcagccat ttaatcaatc  
109081 ttccgcctag cactcaaaga ctcaacgaaa aagtgtatta tcaagattta aatttagccc  
109141 tgcctagcct actgcttgag cgTTTTgcac aaagtcaaaa caatcaaatc aaactcgaat  
109201 ttcaaggctg ctccgaacaa ggcttGTgtt acaaccccc aacttggtat tttgatctaa  
109261 agcaciaaga taaaaatTTT gaaatTTcag cccctataa agaaaagaaa aagactcttc  
109321 aagtaaaatc cgaagaaagt atgatagcaa atttcttagc cacagataag cttttttgga  
109381 tcttactaag ctttttaggc tatggacttt tactttcact tactccttgt attttgccaa  
109441 tgattcctat attatcttca cttatcgtag caaaagtga aacaaaatTT tctaaaaaac  
109501 acagctTTTT tttatctttt atttatgtat tttctatgtc ttttagcttatt gctatcgccg  
109561 gagttatagc aagTTTTTTa ggagcaagcg ttcaaggact tttgcaaaaa cctagtgttt  
109621 tgatctTTTT tgcattgatt tttgtattgc ttgcttttagc aatgtttgaa agTTTTcgct  
109681 ttgaactacc cttaaaatTT caaaatTTTc tccacaaaaa aagtgaaaaa ggcaaaggag  
109741 tgctaggtgt agccctcatg ggctTTTTat ccgctcttat cgtaggtcct tgcgtagccg  
109801 ctctctaac tggTgctttg atctacatag ccaatacagg cgatgcgctt ttaggagcta  
109861 gcgctctttt tgtcatgagt tttggcatgg gaattccttt acttttcatt ggtctaggtc  
109921 ttggctTTTT aaaggcggga gcttggatgc aaaaagtaaa aattttcttt ggttttgTTa  
109981 tgctagctat ggctatTTgg atactttctc gtatcattga aacaagatat attttgatcg  
110041 cttttggaat tttgggcgta ttttttagtg tatttatggg aattttcgaa caagctTTta  
110101 gcgtgataac taagattaaa aaaagtctat tgattttggt tttggcttat tctttaagta  
110161 ttttttagg tgggatattt ggcgcaaaaa atttcttaaa tcctttgaaat ttaaattcaa  
110221 atacactctt aaattcttca aaattaaatt ataactttat aaacgatctt aatgctcttc  
110281 aaaaagagat taaaaccagc acccgtccta tcatgtttaa ctttacagca tcttggtgtg  
110341 aaaattgcaa actcttagat gagcttactt ttagtgatga aaaaattcaa gaaaaactca  
110401 aaaatTTTca tttaatcaaa atcgatctca ctcaaaacag cgacaaggac ttagaaatca  
110461 tgaaagaatt tggTgTTTTt ggcccaccag ttttgatatt ttttgaaaat ggtaaagaaa  
110521 atcttagaat cactggTTTT atcagtgtag atgatttatt acaaaaattg acaaaatgaa  
110581 aattaaaagc ttgcaaatag gacatatcaa ggattatggc ggctttaaaa gcgcctttat  
110641 aaaaaatatt ttttaaaag aagtggatat tgatttttctg ggcattatta acgacaatat  
110701 agcagataca aaacatcatg gcggaaaaaa taaagccttg tttgcaaat cttatcataa  
110761 ttacccctt tgggaaaatt ttcttgaaa aaaacttgag tgtggtatga tgggagagaa  
110821 ttaaccctt gaaaatttac acgaacaaaa tgtttgtata ggcgatatac atcgatttga  
110881 agatgctatc ttgcaagtaa gcaaccgcg caaaccttgt gtgaaaattt caaaaattca  
110941 ccacaatcca aatttcacac aagaaatTTT taaaacagga ttaagcgggt ggtattatcg  
111001 ggttttagag ggtagaaaaa ttcatgcaca ttctaaaatt cagcttatag aaagaaatcc  
111061 cataaatTTa agcgtcctag aactcaatca tttatTTTc aatcctcatc aagcactcaa  
111121 acaaaatcca actttgcttg aaaaattaag caaactcgat acgctcattt cacaaaattg  
111181 gcacgaaact atacaaaaac gcttaaaaaa tacctacgat ttaaactata tgcaaaatTT  
111241 ataattTTTT aaagtattct taggctacaa tttaatTTTT ttgaaaggat aagcatgcaa  
111301 agacaaacat ggagtagcac tcttacttat atcttaaccg tcgcaggagc aaccataggc  
111361 tttggtgcaa cttggcgTTt tccttatctt gtaggagaaa atgggggttg tgcttatgTT  
111421 ttagtatTTT gtatagcaat gatactcatt ggtatccctg ttatcttagc tgaaaatgtc  
111481 atcggtagaa aatccatgac aaacagcgtc gatgctTTTT aaggtaaatg gaaatTTata  
111541 ggctatatgg gactTTTggg tagTTTTggt atcatggctt attatatggt cttaggtggc  
111601 tgggTTTTtg tctatgTTTT tgagttaatc ataggcaatt tcaatctctc tcatactgta  
111661 accaaagatt ttaccgagca atTTTTaat gaaaaaattt ctttcaatcc tttaggtgta  
111721 ggaatTTTTa ctacactTTT tgtccttatc aattatatca ttttaaggcg tggcattata  
111781 gatggtatag aaaaatcagt taaattcctc atgcctttgc ttttcatttg tcttatactt  
111841 gttgtaggac gcaacttaag cttgaaggt gccatgaatg gtgtaaaatt ttatcttacg



111901 cctgattttg acaaaattct atcccgaaaa ctactcatcg atgttctagg acaagtcctt  
111961 tttgcgcttt ctctgggttt tggcgtgatg ataactcttt catctcatct tagcaaaaat  
112021 gaaaacatga caaaaactgc cttttataca ggagttttaa acactcttat tgctgtgcta  
112081 gcaggcttta tgatctttcc tgcgcttttt gcagcaggac ttgagcccga taaaggacct  
112141 tcttttagtgt ttcaaaccct gcctattgcg ttttctcata tccacttcgg gactatcatt  
112201 tgcattttat tttttatact tttactcatc gctgcattaa cgacaagttt gcctatatat  
112261 caagttatca tcagtggtttt agaagaaaaa ttcaaacttt ctaaaaaaac agctattaat  
112321 ttaaccctag gttcgatttt catactagga aacattcctt gtatactcac ttatgggcct  
112381 tggagagata ttactcttgt taaaggaaaa aatattttcg atagttttga ttttatcagc  
112441 ggaaatatct tatttggtttt aacagccttt ttttgctgta tctatgtagg ttgggttctt  
112501 ggcaaagagc aaagcataaa agagcttagt aatgaaggta aattaaaaag cgtgggattt  
112561 aaaatttggt tttattatat taagttcatc atacctttaa tcattcttac aattttcggt  
112621 tatggagtta caaattaatt ttttataaat gtataaacac aagcgatttg aatcgcttta  
112681 tctcttatgt ttgattactt ctcatctact ttttaaggctt atacttcaa atgaaccgaa  
112741 aacattcata agaaaaactc cttaaataat gggcctagta aataccaagc taggtctatt  
112801 tttattatat tttctactct aaaaatttag aatttttatt attttaagtg ctttttaaga  
112861 aaaaactata gatttatgtg ctacaattac agcgttttac ttaattttaa acaaggagaa  
112921 ttctcatgaa actagttaaa cttagtttag tagcagctct tgctgagggt gctttctcag  
112981 tggcaaatgc tgctccactt gaagaagcga tcaaagatat cgatgtatca ggtgttttaa  
113041 gatacagata cgaatcaggt agatttgtaa aagatcttaa cttggtaaat ggtagtagct  
113101 taaatacaag caagcaagag cataaataca gagctcaact taacttcagc ggtgctatag  
113161 cggacaactt caaagctttc gttcaacttg actacaattc aaaagatggt ggttatggag  
113221 tagatagcat tagcaataca agcgatactt taaatggtcg ccaattatac ttaacttaca  
113281 cagatgaaaa tgtagctaca agtghtaatc taggtaaaaca acaactcaac accatctgga  
113341 ctgataatgc aatcgatggt ttagtaggaa cagggtgtaa agtagtaaat aacagcatcg  
113401 atggtttaac ctagctgctt tttgctggtg atagttctaa tgaagcagta catactacta  
113461 ccaatcctaa aggtgatact gatgcaagcc cattttttaa ttggaataaa aatatttatg  
113521 gtgggtgcagc tgtcggttct tatgaagtat ttaatggtca attaaacca caattatggt  
113581 tagcttatat gactgacaat gctttcttat atgctgtaga tgcagcttat agcactacta  
113641 tctttgatgg agtaaattgg actcttgaag gtgcttattt aggaaacagc cttgacaacg  
113701 aactcaaaga tgctggcttc ggaaatggta acttctttgc tttaaatggt ggtattgaag  
113761 taaatggctg ggatgcaact cttgggtggtt tatactacgg taaaaaagat aaaggtagt  
113821 taactgtaat cgaagatcaa ggaaatatcg gatctttact tgcaggtgaa gaaattttct  
113881 aactcaagg ttctcaactt aatggagata taggtagaaa tatcttcgga tatgttaaag  
113941 caggctatac tttcaacgaa acagttcgtg taggtgctga cttcgtatac ggtggaacta  
114001 aacagattc tacggttaca ggacacgcag gtgggtggaga taaacttgaa gcagttgcaa  
114061 gagtaagcta caaatactct ccaaaactta acttctcagc atggtattct tatgtaaag  
114121 ttgataatgg tgatcaagga gaaggtgatc acaatactgt aagacttcaa gctctttaca  
114181 aattctaaga agctctaaag tctaacttca aggtggagtt ttactccacc ttttttata  
114241 tcttcttttt aaagcttaaa tttatataaa atatctttct aacttaagtt caaagaaatt  
114301 ttccaagct aaaaagcttg aagaaaatta agatttaaac caatggggtta ttttttcaa  
114361 caatcctttt tgctcatggt gcataccatc ttttatccca aaactttcac tgagtttttc  
114421 taaaagttct ttttgctcat cattgagtga atttggaaat ttgatagcaa tttgcacgat  
114481 ttgattgcct atgcgagaac tatgcacatc ttttactccc tctctttcaa gcacaaatct  
114541 ttgcccctct tttgcaccct ttggcaaat taaagtcgcc tcccctcgta tggtaggcac  
114601 ctttatactt tgtcctaata tggcttgagt aaaaaatact ggaaattcta tataaatatc  
114661 ctcatcatct cttataaaag tatcatctc ttcaacgata actttaacat acaaatccc  
114721 tctattgcca cttttactaa gattgccttt agctgcaact cttaaattca tgccattgtc  
114781 tataccttca gggatgttta cttctacact atccttaagc tcttcatagc ccctaccctt  
114841 acaatcttta catttctcac ttgcactttc tccactcccc ttacaatcag gacaagtttg  
114901 cgaaaagta ataaaacctt gagaaattcc tacttgtccc ctacccttac attttgaca  
114961 agtttgaagc tttccatcct tagctcctgt tccactacaa gttttacatg aagatttgta  
115021 agtaaaatct atattttttt tacagccaaa caccgcttct ttaaaagtaa gttttaaatt  
115081 caccacaagt tcagcttgaa atttttcatc acttgatttt ttgcggcggt gcgatgatcc

115141 accaaagcca ccaccaaaaa aactagaaaa aatatcacc aaatcttcaa agccacccaaa  
115201 acctgctccc cctgatccaa aaccgccacc ctttaaagca tctttaccat atctatcata  
115261 aatagcgcgt ttttcttcat tgcttaaaac ttcataagct tcatttacia gcttgaattt  
115321 atcttcagct tctttatctc cttgatttct atcggggtgg tattttaaag cctttttct  
115381 ataagctttt ttaatggat ctttatcagc actctgagta atttctaaaa tttcatagta  
115441 gcttaactcc atatttttcc tttaaataat aaaatattta taaaatttgt aaaaataaaa  
115501 aatataattt tagcaaaaat aaactcaata atttatcaaa atttaaataa aattatgtaa  
115561 atatataaat cttacataaa taataaagga taacaaaatg attaatgtgt tgatgataga  
115621 agatgatcct gattttgccc aattattgtc agaataatta actcaattta atatcaaaaat  
115681 cacaaatttt gaaaatccta aagaagcttt aaatgtaggt atacaaggct atgattgttt  
115741 aatcttagat ttaactctac ctggaataga cggacttgaa gtttgtagag aaatcagaca  
115801 aaaatacaat attcccatca tcatttcatc tgctagagga gatttgagtg ataaagtagt  
115861 aggacttcaa atcgggtgcag atgattatth accaaaacct tatgatccaa aagaaatgca  
115921 cgcaagaatc atgagtctta ttcgtcgcac aaaaagagct gaaaatacta gcaatgaaaa  
115981 tatcaattca gcttttaaaa tcgatgaaag aaaacacgaa atcacttatc aaaacaaggt  
116041 cttacttta actcctgccg aatatgaaat tttagaatac ctcatacagc aacacggata  
116101 tagcgtatca agagaacaac ttgtaagtcg ctgtaaaaat cttaaagata aagactctaa  
116161 aagccttgat gttatcatcg gtcgtttaag aactaagata aatgatagtt ctaaatctcc  
116221 aaaacatata ttttcagtta gaggtatagg atataaactt ataggatgac aaaaaattat  
116281 tctatttata ccaaacttgt tttttatth gttgtaacct tctttttagt ttgtgtttta  
116341 tttattgtac ttttaaaaat agaaagcaat acttacagcg aagaagaagg ctttaacaaa  
116401 gaaagtthta taaaaaatat catcaattct tatggcaatt cttctggggt tgatatagga  
116461 gctcatctta ataatagtgg atttgttgcc atacaaaatg actatthtgc aaaaatcgca  
116521 aggatagatg gacaaaacct tttcgtgca ggaaatggag aaaattcctg tactctctct  
116581 tctthaaaat atcaaaaaca actctatctt gatgtccaat gcaaagattt caacgctthta  
116641 tttgaagagg atactaaca tagagtgtat aatctthtat taataggctt tttctthttt  
116701 tctthcttag tagthttttat gtatthttca gtatthaaat cctcgaacc gctcaaaaaa  
116761 ttaagaagac aagtcgcaga agtagctaat ggtggaaaac ctgattthtga aaactaccaa  
116821 caagatgaag taggthaaaat agcctthtga tthcaaaaag cththaaaaa aaatcaagaa  
116881 cttatacaat caagacaact tthtctacgc accatcatgc atgagctthaa aactcctatc  
116941 ggaaaaggta ggattatatc tgaatgcta aaagaagaga agcaaaaaga aagattgatt  
117001 gataththtt taagaatgga thccttgatt aatgaatttg caaaaataga aaatctthtt  
117061 tcaaaaact acaatcttca gththaaact gtacaththta gcactatact taatgaagct  
117121 aaagattatt taatgcgtga tgattthcaat aaagthtca agctthactt aaaacacgat  
117181 gccttgatta atgtagatat ggaaaththtt cthttgattt taaaaaatct cattgataat  
117241 gctthaaaat attcaagcaa tgggactthgt gagctthatt gthtgaaga atgthttgtg  
117301 ataaaaatc ctggtaatcc atthaagtga cctatagaac atththttga ggctthttag  
117361 cgtgaacct atcagaaagt taaggggatg gthtttaggac thtatatcgt thttgaagtg  
117421 tgtaagctac ataathttga taththttat thttacgaag aaggcaaca thgtthtaaa  
117481 atththttcg gagthaaaac aaacaatgac acataagggt gthgaaaaat thaacgaact  
117541 tgtagaaagt thtgcaatt tgcccactat cggthaaaaa actgctatth gccttgctta  
117601 tcatatctgc acagcaaatc aactthgaagg tatgaaactc gcacacaata tagaaaatgc  
117661 catacgctth ataaagcctt gtcagcaatg cggagctthta agcgaaaacg aactthtgcga  
117721 aaththgacc gatgaagaaa gggataagaa thtctthatt atagthcaaa gthcctaaaga  
117781 ththttggth atagaagaaa gthaaaagcta thggggtthg ththttgtct tagatgattt  
117841 aatgatgaa aaactcgccc aactaagaca aatgatacta aaattacaaa gcaaagaact  
117901 cththttgct thtactcaca atththaaatc cgatgcaatg atththttaca tagaagataa  
117961 actthaggat thaaaththgc aaththtagcaa aatcgcgag ggtaththcaa gthggagthta  
118021 thtggaath gthgactthta tatctcthaa thaaagcatt aaththtgc ctaagththta  
118081 aatcagthct tataagaath gtcagctaat thctgcaag aatgaththgc thththttca  
118141 tagcthaagc cctctthtagc thaaactca agcaagthtt thctcatgat ththaccgca  
118201 cthacaatct cthgcatag agthaaaact atagthttga thcgctthtg aacgcaagct  
118261 aaaaththcg tagggggcaa atctccatth aaththcatat atthcgaggt thgaagcatt  
118321 thtactthctg thgctactacc gthccaattg atctthtttag gcattgcatc athaaggaaag

118381 aaaaatacat cgccgatttt tgaattatct gcatctatac aatcaagcac tatcatcttg  
118441 tcatattctg cgataatata gctaagttgc aaggctaagg tgcctccatc gacgaaatth  
118501 aaactgtgat ttggatgggt aaatttataa tttttctcca aaagtttgca aagatgaacg  
118561 cctatgcctt catctgcaaa cataatattt cctataccaa ggataagaaa tttcaattht  
118621 tctcttcttt aacaaattht taaccgctaa ctatagcatc gatcgcacca tctttacctt  
118681 taatcgcatt gaaaaatgcc atatagatat gaacggggcac aaagattaaa ataaccaca  
118741 ttaaaattct atggtaagtt ctaacatcag ctaaactcc aagagcggcc tctaaaggct  
118801 ttaacacttc atacaacaat cctcccaagc cctcatgata agtatgagta taaagaatca  
118861 gtcctgttag aataatcccc accataacaa tataaaaaaa tacataagtt acaaattgca  
118921 aaggattata aacaccttht aaatgtggat gttttcccaa aaatagataa aatttaatct  
118981 gctctatcca taatthtggg ttaagcacat ctgctatact gatcgcctct ttgcgactta  
119041 tcttatcgaa aaagaaaaga taaacttht aaatcacaca agcaatcaaa acaaaaccga  
119101 cagcttgatg caccattctg tathttgctt gcatgaaatt aaccggctcg ccattgctta  
119161 caggattthg aaaaacatag gaaagataat atcctgttac aaccaaactc actatagcaa  
119221 aagctctcac ccaatgtggt aaacgcaaac ctatgctaaa ttcattatca gcctthctt  
119281 gcaatthttc ttctthtatt tgcataaaag cccctthtata aactcgcgtt tathttgtat  
119341 tcgcttagat tathttccctt agtatccatt acatgcaccg cacaagcaat acaaggatca  
119401 taagagtгаа tthttctaat gathttcaagt ggttgthttta catcagcgat tthttaatct  
119461 atcaaacatt gctcatagct tccgccacg ccattagcat cthttggact tgcattcaa  
119521 gtagaaggaa caactgctg ccaatthtct atcactccat tthttaatct gcaccagtga  
119581 cttagcgttc cgcgtggcac atgccccata tagcggcctt tgtactctt agaattatcg  
119641 atcacataag gcgcacaagt gctctcatct actthttaat tthtactaa attacggaaa  
119701 gctthttaaag cattattagc cacaatthtt gctthcaaac aacgcgcagc agtthcttca  
119761 agagtactaa atacagcatt taaaggaagt cctgthttct ttaaaaactc atctaccaca  
119821 ggaacaacat tthgattacc cttagcataa tthacaacga tattagcaa aggtcctact  
119881 tgcataggat thctthcata gcgtggagct ttaatccagc tatathttacc cttagtatca  
119941 aatactthtag aatgcactgt atthccatga tgatctacac thtcaccctc tacaagctct  
120001 gtataatthg gathttgthtt accatcataa ggatgtaaag gctcattatc tgcataccaa  
120061 gaatgagtcg thctthcagth gatcttatct tctthtactt catatacctt gctthaatcg  
120121 ccathtttht taatthcact thcaaacaac cactcatctc taccaagctg gaathcttg  
120181 aaagtataaa gathatthtacc ccaatatcg thtagcacac taggttcgth tgcataagct  
120241 thtctgcca taacaagatc aggataataa gcacggthta caaagctthg tactthcttg  
120301 aathttthcca tatactcacc cattctagca gggcttagca aatccataac gcaagthtaca  
120361 ccaccacgg ttaagctthg cggatgagga thtttagcac cgaagatagc catacattga  
120421 gctatgattc thtgaattct taaacactct agataatgtg ataaaacgat caathttgt  
120481 tctggactta agcgataagt aggatgacca taataagcat ttgcaaaagg tcttagatth  
120541 cthttatcta caaatgthtt aagctthttg tgcactthca gaagthttatc cgctctgth  
120601 gcataaggca thgaagtata thttaaagcc tcatcactth cthttthtacc atcagcactt  
120661 aaagcactta ctacatctgc ccaatcaagt ccatgaagth gataaaaatg cacgatatga  
120721 tcgtgtaaga aaagtgcggc atthcathaaa gthctthgtta aaagcgcatt taaaggcgga  
120781 gtaataccca aagcathttc aaccgcaact ataccgctt tatagtgaga aaaagtacaa  
120841 acaccgcaa thctthgggt cataaagccc gcatctctth gatcgcgctc thtacaatg  
120901 gthtcaatac cacgccataa agtagaacc gcataagctt cthtaccac atthgtatca  
120961 tcaacaacaa thtcaactct taagtgtcct tctathctth taattggatc tactattht  
121021 thttgactca tgtathttat thctcathtt thttcataga tgcgatcacc gcatgtgctg  
121081 caatagcaac gcctgtaagc gthtagaacac ctatacctat thtathctgat acathatcag  
121141 ctcttagccc aaaaacagta tcaathttac gactthgcat aggtctthca aaaggccca  
121201 tagtatccca gaaathttgt tcagaacaac ctatacagcc atgtcctgct tggataggcc  
121261 aagaagtgtg ctgathaat thttctctag agcagthtatt gaaagtataa ggacccttacc  
121321 aaccactth ataaagacaa taaccathtt thtgaccctc atcgccaaag thttgcacaa  
121381 atthaccgc atcaaaatgt ccgcgtctth cgcaaagatc gtgaathctc aaaccataag  
121441 cccathttgg tctathtata acatcaagcg caggcaactc gccaaaaagt aagthaatgta  
121501 aacathttc tactathttt thttcactth gcggacaacc tgggacatta athaccgtht  
121561 tgctthgttac thtgctthaga ggtthgagcat tgcctthggth tggctthtga cthtgaathc

121621 caccaaagct cgaacaggtt cctatcgcaa aaatagccaa agcattttca cttgccactt  
121681 tagaaagctc atagccactc tttccatgtg gtcctatggt taaaaatttc tctgtatctc  
121741 ccatagggat accgccttca accattaaaa tatatttgtt tttatatattt tcaatggcac  
121801 tttctaaatt ttcttcagcc tgccaaccg ctgcagccat aacggtttca tgggtattcta  
121861 aagaaatata atcaaatatt aaactatcaa tagttggagt atcgcttctt aataaactct  
121921 cgctacaacc cgtacattca gccatatgaa gccaaatcac aggaagtctg tctgcaagtt  
121981 ctgcagcttt tgccaccata ggggtaaaac tcgctggcaa tgctaaaaat gctgtcatcg  
122041 cccctgccc tttcataaaa tctcttctag taaagccgga tctttctaaa gcttttggtta  
122101 tagaattttc aggattttaa gaaggaagtt tctcaagtgc acttaaaccgg gactctattt  
122161 gattataatc aatcattgaa attccttaat taatgtaatt tgttctactt aataataaaa  
122221 caaagcaaat taaaaatgta ttaaaattta aatttcgata gaaaaatata aacaaaactt  
122281 aaagatatat taataaaaac taaaaattta tatccctttc ttttagcttg cgaatcaaaaa  
122341 tcttgcaagg tgtatacaag gaataaattt tttaaatacc ccaaaggct cttcattaat  
122401 caaagcacia agatatcttg cagctaaaac agaggtgcta aaagctcttg aaccatgagc  
122461 aaaattaaga tataaattgg ggatattttg aggcaaagtc tgtgtcttgt tttttgtcca  
122521 taataaggct ttatattcct gcttataaaa agcttcatca taagctgcc ctacaatagc  
122581 aaacctatcg ctagaataag atctaaaacc cactctagag cttttgatga taatttcctc  
122641 atcacctttt aaaaattcct gtatattttg caaattttct tcatcatcag ctttttggg  
122701 atgtgggttt gaattaagcc tatcataact tgcaccaata acttgcaaat ccccatcact  
122761 aggacaaata taagcttttg aagaaagggc aaatgcatta tctaaaaaag gtttttagatg  
122821 agtaacctgt cctctaacct tacttaaaag cattccatca taaactaaaa aatccttagt  
122881 atcagcacc atagcataga ttaaaatata aaaatcttgg attgcttttt ggtttttaaa  
122941 atgtaaagta aatttgcctt cttgggtgtg aaaaaaatca tattcgtgat taaaatacat  
123001 ttttgcctga cttttttcaa aaagcgattt taaaatttct ttaggcttga tgtgtccgcc  
123061 atcttccaaa aaagcttcat tcttgtcaat cttaaataaa acattatctt tttggcttat  
123121 aaaacgctct tgcattaaag gagtatgagc aaattctatc actccgttta gatttaaatt  
123181 taaaatttgc ttataaaaac gactcgcctc gataaaagca agttgagaaa attcgcccaa  
123241 agcaacatca ggttttaaaa tcaaagagct taaaattcca ctttcattgc cacttgcacc  
123301 acatcctaaa ctatcatttt tttcaaaaac actgacttca aaatcacgca aagaaagctc  
123361 ataagccaaa gtcgcaccac atatacccga gcctataatg gctacttttt tgtttttata  
123421 taaacttggga attcctttgaa aataagcttc tttatctagg attggatttt ctttgcgtaa  
123481 aaaagctttg atcatctctc gcttttctaaa accttttagt ttttgaactt caaagccata  
123541 ttttataaga tttttttgta aaatactcga agcagaaaag gtgcaaat tgggtatcaat  
123601 ctttgaagt cgagcaactt gagctatgaa attttcatca aacatagctg aatttttact  
123661 cggagaaaaa ccatctaaaa accaaacatc agcattaaaa tcaagctcac taagaacagc  
123721 aatatcatca aagattaat ccaaaaagca gtctttgaaa taaaagcgat aatatccttt  
123781 ttttagcctta ggataaaact ttaaaaaagc ttctaaaatt tctttaaatt cttcataaaa  
123841 tccaagctta tgataaattt ccctaagctt gtctttttcg atataaaaac cttcaact  
123901 gacataaaat aatttttttag gacgcttttt tgcttgaaga aatcttttaa gaggtaaaaa  
123961 gaaattaagt cctataccaa agccactttc agctatgata aatgtatcat tttctttaaa  
124021 ttcaaaagcc tcgctataaa caaatttact ttcattttaa ccatcttttg agttaaaata  
124081 aaaatcatca aaatccaaag aaaatggagt attatcttta aagattaaat tagctttttt  
124141 catctattgt tataaaaata attctccaca ccatcagcta taccctaac caaagtgtct  
124201 tgaaaacttt tatttgcgat tctttttcct tcacttggat gagtaatgta tccgatttct  
124261 atcaaaatag caggcatttg agcccaaca agaaccaaa aaggagcttc tcttactcca  
124321 ccatcaacia ttttatattt cttgaggtt tgggttaaga ttttttttg cacatcgata  
124381 gcaagtttgt ttgaagccac aatcttttct ctgtttaaga aattttaa gctttgtttt  
124441 gaaaaataat taatctcttc aaaatcacct tgattttctt tttcggcagc ctttttactt  
124501 ctttcacttc tagcaggact taggaaaaaa gtctccacac cctcgtgct ttttgctctt  
124561 gatgcactag gcgctgcatt cgcatggata gataaaaaca aatccgcctt tttatcatta  
124621 gcatactttg ttctatctct aagattgata aatttatctg aacttcttgt gtaaagtact  
124681 ttataaccgc gttttttaag ctcatctcca agttttaaag tcgtgcttaa aactatatct  
124741 ttttctttta aagtgccctt tttatcactt aaagcaccgc tacccttacc ccatgtccc  
124801 gcatcaagca ctatgagctt atcggatttg aaattagaat ttaaaacatt tttattgcta

124861 gtttttgaag tgcttttact tgaacagaa gtgtttttac ttacactacc accaaagcct  
124921 aaagtcaaat ttttgccatc taattcttta aaaagttaa attccttagg tgaactaagt  
124981 acaatgCGaa ctgtttttgg attatactga gtaactgtaa cagcattttg cccaaaagta  
125041 aaattcttgc gactacctc taaaattcct tgaagctca ctacttgcct aaagaatfff  
125101 tgatcttttg tgctaaaact tgtaatatct ttttcatcaa gctcatcact taaatftaaa  
125161 acaacagaat tagaactttt atctacatct aaaacatata aaggttcatc atctgcttgc  
125221 tcttttttag tatttgtttt agcttcttga gttttaactt gcttaggctc ttgttttgca  
125281 actactttat cactttcttt ttttactgct gtctttgttt cttgttttagc agaaatattt  
125341 ttttgtacag gttgtgattt ttttagaaata tttatftttt catcttcaaa atcaaactct  
125401 ataggaattt tttccttagc ataagcaaca atacgaatag tttttggatt gtattgCGaa  
125461 atcactatgc gataatcatc aaatttatat tcttttcttc caccttctaa aacaccttca  
125521 aaatcactga tataacgata atttcccttt tcatccaatg caaaactttt tatatcttct  
125581 tgctctaaat tggatfttaa atcaagcacc actccttgac ttgtcttact tgatftftaaa  
125641 acataaacct tatctacttt ttttgtctgc tgggggtttat tgftttgCGt ttttacaatt  
125701 tcttgtttag cttgttgggg ttttggagtg cttttagggg gatcaaaact agaaagctcg  
125761 acattfttag aactagactg aagttftttgt ttatcctgaa taactgCctt tctftaaagca  
125821 ttgatactag ctttgctaac tccgctttct tctagtctat tCGcataaga tttatcatct  
125881 aaatftaaag cattggaact tataatcaat cttftftaaaa tttcgatttt agttfttttca  
125941 tcttcattaa ttacactttg tatataaaga cttfttagct ggtgatgaaa tfttaacttga  
126001 gcatcatttt ttgacataat gaaattctta tcaaagttag caagctcatt ttcatacacc  
126061 ccaaaacaaa tactaaaaag cgcgatacaa aaaactaaaa ttctaagcat tattcaccat  
126121 tgacaagttt atccataagc tctftaacac tgattaattt ttctaaacga tagccattag  
126181 ctctgtaaa aaataatcct gtttctfttt ttcccagca tgcgtcaaaa agtctatctg  
126241 ctatacaata acccaccttt gttgcctctt tacctcgcc acatggcgct acacaattac  
126301 tgatacaatt gatctttggt cccattcttt tatcgactaa atcaagcaaa ttagtcctta  
126361 ctctcttgc aggatctct actggggatt tgataagttc tatatcttca tttttacatg  
126421 caagcaatac atftftftaac tcatcacttg catcacattc aaaagtgcct ataaaacgag  
126481 ttcccatttg aaccctacta gcacctaaag aaatggcatt ttctatatct tftttatccc  
126541 aaattccacc cgctgcaatc actggaaaag aaccctcaatt tttagcctct tcaaccacag  
126601 gtgCGattaa attctcaagt tgataattag gatctaaaca ttgctcatag gtaaaactt  
126661 gatgtccacc gctcttaggt cttcaagca caacagcatc aggcagacgg ttatatctgc  
126721 tttgcatct tttacagatg atftftftaaag ctttaggcga agagattata ggaactaaag  
126781 caacatcagg gaaatccgct gtaaattcag gtaaattagt aggaagtcca gcgctgaaa  
126841 ctataacatt aaaaccctc tcaaacgat cagcagcaat tcttgcataa tcattacttg  
126901 cacataaaat attacaacc aaaggcgcat caccgcatac ttttcttgc tftatftatca  
126961 aagtttgcaa gccttctcgt gaataaaaaat tttcactacc ataaggctta gcattcagtt  
127021 ctttgctaat atgggtgCGa ttttcataat atcctgttcc aacagatgag ataataccaa  
127081 gaccgccatt taatgacact gccgaagcta atfttatccca gcttatacca agccccattc  
127141 cgccttgaaa aatgggatat tttatagtgt gttttcctat ttgaagggat tftaaactca  
127201 tatattcacc tftaattttg caaattttct cttacctact tgtaaaatat actcccctgc  
127261 gctaagttgc atttgctcat cgcttacttt ttgtgaattt aactcactg catttgcatt  
127321 aatgcttctt cttgctgcag aggtagaatt ttccaaaccg cattctacta aagcttttagc  
127381 aagccaaatt tCGccttgta tctcaaattc ttttatatcg cttggcaaaag catttccact  
127441 atgcacgcta tcaaattcgg cttttgcagc cttagcactt tcttcattgt gaaaacgCGc  
127501 agtaatctct agtgccaaat tttccttagc aagtttagga tgtaaatgC cactagaat  
127561 ttctfttttc atatftttcaa tttcttctaa actftfttagta cftaaaagct cgtataaacg  
127621 ccacattaac tcatcactaa tacttagaat tttagcatac atatcattag ctttttctgt  
127681 aacgccgata taatftccca agctfttact cattfttatt acaccatcta aaccctctaa  
127741 aagaggcatc atcatcagc cttgttcttt tccggtatta taaattcttt gcagggttct  
127801 tccattaag aggtftaaatt tttgatccgt tccaccatt tctatatcac atftftaaggc  
127861 tacgctatcg tatccttggga gtaaaggata taaaaattca catatagaaa taggactttg  
127921 ttctftftaaa cgctttgtaa aatcatcCGc ctctagcatt cttgcccacac taaaggttga  
127981 agtaagctct actattccag cagctcctag ttcatgagc cattgagaat taaatftftaa  
128041 ttgCGctttt tgaggatcta aaatctftaa tacctgctct tcataagttt tggcattftt

128101 taataacttgt tctttatcaa gctttttgcg tgtaacgctt tttccactag gatcgccaat  
128161 ttgccctgta aaatcaccga ttaaaaattg aactatagct cctgtgtttt gcaaatatgc  
128221 cattttgggtt aaaaccacgc tatggcctaa atgtaaatca ggtgcagtag gatcaaatcc  
128281 cgcttttacg aaaaaatttt cacccttttc gtaataattt ttaatcaaat tttcaactct  
128341 ttcttcatcg atgatttctg cacaccctcg tttgatttct gcaagtatat tttttatata  
128401 cattttccac cttttagttt aagcttcttt ataagcgtca tttaatgaag taaaatctaa  
128461 aattttacaa taagacttca atctatctcg gacattatca ggatttatat tgtcaggaat  
128521 ttctatcgtg atttcaaaat aatccaccac tgtattagta tcacttgaca aactaatcgt  
128581 taataaatta atctgcattt tagccaaaac tgccaaaaac tctgctaaaa ttcctttttt  
128641 attttctaaa gaaaaaatta atttgtatga tttaggtata ttagaatccc atttaatcaa  
128701 aaccatgtct ttattattat ctatcatttt gtctgcccta tcacagagtt tatgatgaac  
128761 tatagcgttt ccattctcga taaatgcaag cacagcatca cctctttttg gatggcaaca  
128821 gtaatcaaaa tccacattag caattttatg attagaatat aataaaaaat ttccaatttt  
128881 ttgctctttg atttcatatt tatcaaacca ataagacttc ttagcatatt ttttaagccc  
128941 attgactata tcttttaaat aagcactatc gctagctact tgtcgtatgc gcctacctaa  
129001 attctctttt tcgatccaat tttctatctt attcttatct acgctaaaaa taaaacttaa  
129061 catattaatc gcgcttaaaa gattgatttc tctcattttt tgcttgcaaa attctcttat  
129121 actcgttttt gcttttctg tttttacact atcaacccaa gagcaacgat aaaatctatc  
129181 attggaagt acaaccgta ctatatctcc atttttaagc tcggttaaaa gggggacttt  
129241 tacgcgatta acataagcgc tttttgctg aagccctact ttagtatgta cttcataagc  
129301 aaaatcaagc acggtagccc ctgcggttaa ggtaaaaatt tcaccctttg gagaataaac  
129361 agccacatcc tctacataaa gactatcttt tgcatactca taaagctcaa tagcattata  
129421 atcttctgca ttttcaagat tgttcgtgct ttgcattgaa atatcagcaa gccaatcaag  
129481 tcgcgaggcc acaacgcttc catcttcttt atatttcaa tgcgcagcta taccaaattc  
129541 agcgatttta tgcatatcaa aagtacgaat ttgtgcttcg ataataatct tcgtatcaaa  
129601 aagtgttgtg tgtatgggtt gatagccatt ttgttttggg aaggctatgt agtctttaa  
129661 acgcgaaacc aagggattaa aatttgtatg taaaaccctt aaagccaaat aacaatcgtc  
129721 cacattttca accaaaatcc tcacgccaag tagatccaag acctcttcta taccacacc  
129781 ctttctttgc attttaagat agatagaata actgtgcttg atacgttttt gaatttgaaa  
129841 acttcttgc ctaaagccat tgctaagaaa taaaagttcg atttttgaaa taaattcatt  
129901 aaggcctagt tgcatttgc gatcgtttga attgatataa ttatcaataa gtttatactc  
129961 atcaggcatt aaatatttaa aacttaaatc ttctaaataa tttttaatac tagaaattcc  
130021 aagtctatgt gctatgggtg cataaacgac taaagtttct tcgctgatac gcttttgctt  
130081 atcttctctt aaagcatcta aggttagcat attgtgaagt ctatcgcaaa gttttaccac  
130141 caaaaccca acatcttcaa tacttgctaa aagcatatct ctaaagttaa gagcagattt  
130201 ggtaaactt ttctttgatt ttgaaggaat aagattatct tctctgattt ctacgatttt  
130261 tgtaaggcct aaaacaagct ttaaaacttc agatccaaac tgatctctaa gttcttcttc  
130321 agtacattgt gtatcttcca tcacatcatg taaaagcgcg gctaaaattg tggctttatt  
130381 ttcacttaaa aaagcaacta agcttgcaac caagatggga tgaactgcat aaggttctcc  
130441 actttttctt acctgacctt cgtgagactt tatgcaataa tccacagctt tttctacaat  
130501 agcatcttct tgacaaatgc taaaagtag ttcttttgct cttgttaaat ctctacaatt  
130561 ttaatatct tcaatgagtt tttcgagcaa taattcctca tcgactgggt tcaactagac  
130621 cctctaaagt gattttatct tctgctatct catataaagc aatatctgcg aattttaatt  
130681 tacttttatc aatatcaacc aaaggtgctg caccatcagc taactgctct gctctttttg  
130741 caacaaccaa agaaagacgg tagcgatcat ctcccattct ttctagtgtt ttagctgcta  
130801 tttcttctat tctattctcc atttatttct ctttgattag tttttaacta tagaacaag  
130861 actgttatcg cttgtataa ttttcaataa atttccttct tcaaacatat tgcatacaac  
130921 tataggtaaa gaattgtcct tagctagagc gattgcagtg tcatccataa ctttaatggt  
130981 atcttgcat gcctcatcat agcttagggt ttgtaaaaat actgcatctt caaatttatt  
131041 aggatcttta tcataaactc cgtttacttt tgttgcttta ataaccattt gtgcatcaat  
131101 ttcaaccgct cttaagatag ctggtgtatc tgttgtaaaa taaggatttc ctgtgcctgc  
131161 agcaaagatt acaaccctac ctttttctaa atgtctttga gcccttctca tgatataagt  
131221 ttcgcaaaaa gcttccattt gaatgcact ttgcactctc acatcaagtc cgcaacttcc  
131281 taaagcttct tggatagcaa tagcattaat aacagtcgca agcattcca tgtgatctcc

131341 gcttgtgcgt ttgataagac caccttttgc cgctgaaaca cgcggaatga tatttccacc  
131401 acctattact atacctactt ctatattggt ttttaactagt tctttgatct catttgctat  
131461 gaatttttaa atagaatfff caataccaaa accattttct cgggctaaag cttctcctga  
131521 aaattttact aaaactcttt ttctctcttg cattttttct ccttaatcag cttgaaatta  
131581 tattgaaaat tgcattaata ttagctaatt taaactaata agttctaaag gattgatatg  
131641 aaaattcttt tgtgtcactt caaaagttaa atcatttttt atcctaccta ctaccgcacc  
131701 tttttttaca tttttaccga ctttaatat gggcgctatc ttgtctaaat gtgcataaat  
131761 agtatgaatt ccattatcat gttcgactat cacaactctt gctagcatac tcgtatcttt  
131821 agcaaaaact atctttccat ctaaaacact ttttaccaca gcatcagctt ttttactttt  
131881 taaaacaaca ttttcattga aaattttaat attataaaca ggatcaatat aatttccaaa  
131941 tttttgcttt acagtaaaag actctaaagg agctatgggt tttttacctg tataacgctt  
132001 agtagagctt cttgataac tagagccaat ttgacgaatt ttttgggtat tattagtgat  
132061 tttactatca ctagcagttt tttgagtttg ctttttgtct tcttgcttgc tttctataat  
132121 ttttaactga ttttaaggttt ttcttaactc atcttgctga tcttgcaaat tttcaagttt  
132181 ttttagcgtaa attgcccgat cggttttttg tttgttaatc tcgctgactt gcttttgtct  
132241 taaattttga agttttgcca attgggtatt ataacttttt aaatcctcat tgatcttttt  
132301 gatttgatct tgcttgctgt cgatttgctt gcttatatct tcataatctt tagagagttt  
132361 aaaaatttca tcttgtaaaa ttttatccaa gctacctaaa acctcaaaag ccataaaaact  
132421 ttccttactt tcaacataac cttgaggaat aggcaaatca taagcaaaat ctttagccat  
132481 taaagttata agcttgccct ccatattggc tttatttttc aaaagatccg tattttgact  
132541 cgtgagtaaa ttttaagtctt ttttttgtgc ttttagctcga gcttcaagct taagggtttg  
132601 agaattaaga gtttcaattt gagcgcttaa ttcttttagg ctcttttctc cgcttaatat  
132661 atcatttgcc aaatcttcaa gctttttatt tacctgctct tgaatgcggt tgttttcttc  
132721 taaattttta gttttttcat tgattgcatt agcataaatt tcattgctta gtaaaaaaaaa  
132781 acaaagaaa attaaaattt ttctcatttt ttcaccctaa acatcaccga atttacacac  
132841 aataaacata taataaaagt cactaaaaaa atcacgcca aatgcacgat aaaattaata  
132901 ggaggcaaga taatatcaac cgctttttaga ctatcttgaa ctatagaaag attataaatt  
132961 tgtgtaaaaa atataaataa aataacaaaa gcaataaaac aatccaaaac cacaatctta  
133021 tacaacataa aagatctaaa ccaaaaaggt gcaccaaaaca agcacataat ctctacacgc  
133081 tcagtatgct caaaaagcca aattttcatt tgttttaaaa ataaaacaaa tgaagcaaaa  
133141 ataatgataa ataaaaataa ccaaaataca aatttcatca aaacaagtaa ggaataaacc  
133201 ttatcatgtg ttttagcaaa agtctcaacc ttgctaatgc ttggaatgct taaaagttga  
133261 tttttaatca tattaagctc attttgcgta ggtaaataat taagcttaat gctataaaat  
133321 ctcggaag aatctcgtaa aatttttaaa tttttatcgg aatatcatt ttttaagcga  
133381 tctatcaaat ttttaggatc taaaagttct aagtcagaaa aggaagaaag tttagttttt  
133441 ataacattct tgtcaagttc agtagagctt gcgacgatga tattataatc tttattgaca  
133501 agttcttcgt aatatcttaa ggtagcattt gtaagcaaaa taaactcaaa agcaaacatc  
133561 ataaataata agggtaaaat caaagataag tgggttttaa aaaatttcat tcatatttcc  
133621 attttctata ttaaaacgac gataattcag tcttaaatca ctcggaattc tatgtgtaac  
133681 caccacaaca caagtacca aaagctctct ggctgatttt aaaagcgtcc aaataatctc  
133741 tgaagaatac tcgtctaaat ttcccgtagg ctcatcacia agcaaaaagct taggattgtg  
133801 tgctaaagct ctagccatag ctactctttg ctgttctcct ccacttagtt gattgggcaa  
133861 tttatctgct ttaaatgtca aatttcatg ctttaaaagc ttgcttgctt gatcatgaca  
133921 aactttttta ctataacctt taatcataag aggaagcata acattttttt ctacgctata  
133981 ttcttgata agtctataat cttggaatat aataccaatt tgctgacgca attttaaaag  
134041 ctctaaattt ccaatttttc gcatagaaga tccgcacact tcaagttgac ccgaaagaag  
134101 ctccaaatcc ccataaaaag attttaacag agtgcttttt ccacttccgc ttttacctgt  
134161 gataaaaaca aaatcatcat ctttaaaagt gaaactagct tctttaataa ccaattcatc  
134221 ataacctaaa gaaagtttat gtgcttgaat taaatttgac atcccatcct ctttgaattt  
134281 caaaattcgt aaattatgct ttatttttgc ttaattttca agaaaatggt tcatattaaa  
134341 gtgaaattta acactttttt taagctcttt tatagctttt aaattttctt gtattttaaa  
134401 aggcctctta aaaacaaagc taatcgtctc tcctatatgc aaataacaat gctcaggctt  
134461 attaaacgca ccaaaggcta tctttaacaa taaactttcc ctttgcttgt aaatattttc  
134521 aaaatgcaag aagaaatcct ctttctttaa agtaaaattt tcaaaatttt tctctaaaag

134581 cattaaatca tttttatcta aatgtatatc cgaaaaatca aattcttctg ataaaggatt  
134641 attttcttct ttatctaaat tccaaacca aagatcataa atatcttttt cctgtctttt  
134701 ccatctgtct tcgtatgtgc tagaaatctc taaatcttca ttttttctaa tgctaaattg  
134761 tggcgtatgaa aatctaaaaa attccttaaa agtaaagtcg aaatactcat aactatccgt  
134821 tctaagttca aacaccctt gggctgtaag cacccttgcg cattctttgc aaaatgcttt  
134881 agaaacaaca cgacgatgag gctttttatc ccaaggaact ggaaagtgtg agaaaatctt  
134941 ttctacagaa tgagactgaa gaacgcttaa taaaagccta gcatcacttt gaaccaataa  
135001 aatattatca ataccctgtg ctttcgcaag cttagccacc tgcgtgatgg ctggattata  
135061 aatttctatc ccaaggatta aaacatgggg attatcttca gcttggtaaa gcaaatgcct  
135121 tcctgaacca aagccgattt caatgtaaat tctcccctca agtcttgcca atacttctc  
135181 aaaatcatta gcaatcaaag gagttttttc agccaaagca ttgtttttta taccaaaagc  
135241 ctgcgtgata atactctcgc aaaaatattg cttaaaaaca tataaagcct tatgtaaata  
135301 ggctatctta gaaggcttag tgtgtttatc taccttaact acaaattcat tttctccttt  
135361 tttaacctgt aaaaaaagc tttcttcttc gacctttgtg tagattaaat tcacattatc  
135421 attatatgcc atccaaacaa attctacccc atctttttca aagggtagaa tgatttcttt  
135481 aagtgttcta gcttttaaat ttggcactat tgccctgcct taactctctt tgaaggctct  
135541 gaacgaaggc caacagaatc aatcgctatc acttcataac tatactctac acccggtaaa  
135601 gctttgatat ctttcaatct tttctctttt atgcctttaa aaatagcatt ttgccaccg  
135661 ccatagcgtc taacttcgta ttcaactgct cttgagtcac tatccacca ttctaattca  
135721 ataccatcac tgggtgctttg agccaaaatc acactaggag aagatggact ccctaaagtt  
135781 ttgccctcta ctccattttt aggcatagaa ctttcaagcc catctatata taccatagtt  
135841 accttatagt atctactctt tgcagcacct tcaactatat cctcataaga attttgctcg  
135901 gttttcgcca aaagagtata aggaagcaaa cttgaactcg tagaataaac tttataatac  
135961 gaaaaatctt tatatttagg agcatcccat gttaaaacta ttttattggc tccatctaaa  
136021 ctgcgattta aatgttcaac ttgaggtggc aaagccttgc ttgtagaatt taaaacagaa  
136081 cttggctcac tttgactcc atcaaaccca accgctataa ttctataatt aaaactctcc  
136141 tctggcttta aatcctcatc tataaattca gcatttaac gattttttac ctgagcaatt  
136201 tttttaaatt cttgtccatc tgccttagct ctttctatga tataagaagc tactcttggg  
136261 tctgaatgag gacgccaat caatttaatt cggcttggta gattggtaat agcttgtgca  
136321 aaagcaatag cctctaactt tggcatagtt tttacttcaa ccacctttcc atcttctgaa  
136381 atatgtcctt gattatataa acttctcatc atatagtaat atttcgtatt tggctcaagc  
136441 ttagcatcta cataatgggt ttgaaattta tccttaatcg ttctacaag tttaaattca  
136501 ggatttgcac catttgaacg atataaataa aatcctttga tattatcatc atataaagga  
136561 tcccattcaa acgctatatt actaatatcg ctaaggcttt taagattgtc aatctttggc  
136621 aagctttcat tgactaaaag ttctttcttt gaacctatat tggaaagttg cgaaacactg  
136681 caagcactaa ataaaagagt caaagcacc aagcaaagac tcaagtgaat ttttttcatt  
136741 aagctctcct aaaataaatt ttttttctaa aatttgttta aaatcgcca ttaatggagc  
136801 ttgaataaat attttttctc catttctagg atgaataaaa tacaaaaaat acgcatgtag  
136861 cataatccta cactcgtatt ttcccctata accatatagt tcatctccta aaatatgacg  
136921 atttatacta gctaaatgtg ctctgatttg atgcgttcta cctgtaaaaa gcttagctgc  
136981 aataaggctc acatcctcgc tttttgcaa gttagcaaaa gcacttttag cctccttaga  
137041 acccttaaca aagctatttg taactatctt tttaatagca ttagcacttg atcgaatcaa  
137101 agctttatct atgataatct tctcctcttt tagtggcaaa tcaattaacg caaggtaaat  
137161 tcttcccata gttttatcgc taagttgctc gctaagcttt tgggtgggtaa aattatcttt  
137221 cgctatcaat atagctccgc ttgtttcttt atcaagccta tgaacaagcc ctgcacgcac  
137281 ttctccacc aaggtagaaa ggggtgtattg tttttctata agccaatcca ccaaagtcgc  
137341 acttttaaca ctctttgcac catgaactac caaatttgag ggtttgttta aaaccaacaa  
137401 atcctcatct tcgtataaaa tttctatata aaaatctata tcaaatttag gtttaacttc  
137461 ctccacaagc ggtaaattta aaacaagcct atctccgact tttagcttaa atgaattttt  
137521 attttgaatt ttatcattaa cccaaacgca gtttttttct atcatcaagg ctatttgatt  
137581 gcgactttgc tgaagatttt tagctaaaaa agtatcgagc cttgaagatt catcaactaa  
137641 aaaagtttgc attttttctt tataatttta tataatttag agttttatct tataattata  
137701 cttaaaatac tacaatttga aggcaaattt tgtttatacc cgatagaaga attttaacac  
137761 attttgatta tatgcaacct attttatctta tacctattat tttgatttca ttttttttga



137821 tatttgaggc caatgctttt ttagctgaaa aacaatttgt ctatgcctgt gtaggaattg  
137881 ctgcatttag cgtgttcttt ttgttgccca tccgcaaact gatgtggctt atacctatag  
137941 cttattgggt aaatattcct ttacttttaa gcacagatct ttttgggtgt gaaaagctag  
138001 gcgctaaaag atggcttgaa attcctttta cacactttac cattcaacct tctgaaattt  
138061 ttaaacctag ttttatttta atgcttgctt atttgatcta tcaagatcca ccgctaaaa  
138121 atggctataa attaaaacaa tttctaaaac ttagtttttt tatcattttg ctttttttac  
138181 tgatcgctca agagcctgat ttaggaagtg ctatgggtgct tttaatcgta ggctttggcg  
138241 tgctttttat catgggtgtg cattataaaa tttggcttag tatcatcatc gccatcggta  
138301 taagtctctc tatcattttat acgcattttt taaaacccta tcaaaaacaa agaattcatg  
138361 attttatctc agaaaaaccg agttatcaag tcgcacaatc catgatagct ataggcaatg  
138421 gaggccttat aggaaaatct caagatgaag ctacgcaaac acattttaat tttttgccta  
138481 tctccacaag tgattttatc tttgcgtatc ttatagagag gtttgggttt ttggggggat  
138541 ttgtattgat tttgctctat actctactca tttttcattt gctaagctta aatcaaaagc  
138601 ttaaggaaga ttattttgct aggggttgcta taaactgcgt agcattgttt atttttattt  
138661 atgctgcggg aaacatttcg atgactatag gatttgcgcc tgttgttggg atcccgtgc  
138721 ctttttttag ctatggagga agttcctttta cgatttttat gattttcttt ggaattttac  
138781 aacatttgat tactttttaga tttttttgga tagatagtaa aaataaaata aaataatttt  
138841 aagcaaaaat aagatataat tttatcttta aaaaattaag gcggatttat agctcagttg  
138901 gttagagcaa ccggctcata accggttggg cgcaggttcg agtcctgcta aatccaccat  
138961 tatattaatt acacttatac aatctaaaaa aacttatatt tttttaccg cttagtaaat  
139021 caaaactaga ttaaaaatth ttagtgtatt ttaactgcat tatattaat taagtaaaac  
139081 ttaagcaaaa ttccaatgga aatttacagg ctatgaaaac tgcttaaaaa acaaaatcag  
139141 ttaattgcga atcaaagcaa tatgtcaatc acaaaataat aaagatattt taaaacaagt  
139201 aaaaataaaa aactttttca aaaagataaa aaataataat ctttatcaat caagtcctaa  
139261 tttttttaa tagaaataaa atgatgttaa aatattttgt ttctatatta aatcaaggag  
139321 aaaaacaatg aaacatttta tttttagcgg attaattggg ttaggtgctt tggctttttt  
139381 agcaggttgt ggcatgagg caaaaacaag cgattattat aaagcgcact tagatgaggc  
139441 aaaagctaga gttgcagaat gtaaaaaaat ggagaaaatg aatgaaactc acaaaaggga  
139501 ttgctctaag gcaaatgaag cggatattat tcaaagagac aaaaataata aattttatca  
139561 atcaagtcct gaagcttttg aatggaagta aattagcttt agttttatth ttatgctttt  
139621 tgattccaaa tttagctttt ggggctgaaa gtcccgaagg ggcgttaaca ctaatcaaaa  
139681 atggactctt atcttggaca ctctcatta aaaccgcttg tttgtagata ttttgaattt  
139741 ttgttttggg ctctttttaa atttctttat aataaaatca aatgcgtatg tgcattaata  
139801 taaaaataaa aaaaatatgc atgtagtatt tatacgtagt agttaatatt aatattatat  
139861 ttcttaggtt ttaaaaaat agtaatttta atacaaagaa aaaaaataag agaagtccta  
139921 taaaatagta ttttgattga atatttgttt gatttttaag gttgaaataa gaacattaaa  
139981 acttaaagca atgtaaaaat atcaatttga agatattgat ttttaaaaaa cttgagtaga  
140041 gtttgtgagt cttatttgat attaatcag tttaaaactt ttagagtaaa gtaaaacttg  
140101 ttttattatt tttatcttat ttattatatt atttacagtc taatttttac gtattaaaga  
140161 aatagtagaa tttatataat tccatagctt attatggttt attttaagct ataataaatt  
140221 gttaagatgt tttccaaga taaattgaca atgagttaaa ggtatthttg actcaaggct  
140281 taaccattg tttcataat ttattataag caagatgaaa ttaaaaatta gttgttaacg  
140341 aatacctttt catttaata ttttatattc attgcaacct ttttgaatc ctaaatcaca  
140401 agctttgccg tagtattctt ttgcagaaga taaatttttt ctaacacctt gaccgtcatg  
140461 atacaaatth cctagatttg tacaacatc tccataacct aattcacaag cttttttaa  
140521 gtaacttact gcttgagtgg atcttactta acaccatcgc catcaagata taaaagtcca  
140581 agaatatcac aagtttctc atacccta atcacaagct ttttaaagta atttactgct  
140641 tgagtgcgat cttgtttaac accatcgcca tcaagatata aaagtccaag aataccacaa  
140701 gttctccat actctaattc acaagctttt taaagtaac ttactgcttg agtgcgatct  
140761 tgtttaacac catcgccatc aaaatataaa agtccaagac cattacaagc ttcttttata  
140821 ttaattcac aagctttttc atagtattgt ttagcttttag aataattacc ttgtttatgt  
140881 tttcttttc caagatcaaa ataattatca tttgaataaa cgcaaacagg tattaagta  
140941 aatacaata tgaaatattt cattaccatc aattttcctt ttaaagctat attatttgaa  
141001 atttttatat tctttacaat catattcatc tctaattca caagattttt cataattaat

141061 tcttgctgta tggcaatctc tttcgatgta cttacacttc ttttaataaaa taaccatcgt  
141121 tcgaaaatac atttgttggt aataaaaatta agaactaata tatttaattt tatttgttgc  
141181 cttttataat taattgttaa ttatagcata aattataatt tacaattgat aatattgttat  
141241 gtaaaaatta aagtttgaaa aaatttattt tttcaaattc caaaagcgac atattgtttt  
141301 agtctctttt taaatttctt tatggtaaaa taaagagctt gttaaaaacg atatatacac  
141361 tgtttttagtc tctttttaaa tttctttatg gtaaaaattcg tttgaagtgc tccattcata  
141421 gtattcgggt ttagtctctt tttaaatttc tttatggtaa aataaaaacgc ttttattggt  
141481 tatacctttc atagttttag tctcttttta aatttcttta tggtaaaatt agagagatta  
141541 gcaaatcatc ttcacatagg ttttagtctc tttttaaatt tctttatggt aaaatccatc  
141601 atcaatcatt gaaagtaaaa ttgcgtttta gtctcttttt aaatttcttt atggtaaaat  
141661 ggtaaagagt taaaagagca attagaattg gttttagtct ctttttaaat tcttttatgg  
141721 taaaattttt agcctaaagc tatcagttaa aaagccgttt tagtctcttt ttaaatttct  
141781 ttatggtaaa attaagagtt ttaaaaaggc ttaaagggtat aaagttttag tctcttttta  
141841 aatttcttta tggtaaaatt ttctatatga aaagagtta gaagaggcgg ttttagtctc  
141901 tttttaaatt tctttatggt aaaatggact ttgaacaaat aaagaaaaat agagcttttt  
141961 gtatacaaaa atgtataaaa atatgctatc attttaaaag agaaatttaa aaagagacta  
142021 aaataagtgg ttttcggtta gccacgcagg gttacaatcc ctttaaaacc gttaaaattc  
142081 aaacaaacta gcttgtctaa ttttattaga cttagttttg ttttctttgt atatcttgtc  
142141 attgctgtat ttaaaatctt gtgttttttc atcgtattca aaaagaacta aatttttatc  
142201 atcattcatt ttttcattaa aagaaactcc gcctaaaagt atttgcatat tgtcaaatg  
142261 tttttcagtt atggttaata ctcttatatt gccacaaggg ggtaaaattc tttctacgga  
142321 tttgattgct gttttagccg aagtcattcc tttgcaaatt ttaacatata cgctaaattg  
142381 catcataaaa aagccaagtt ttacaagcga aactctaaat ttatttgcac ttttttgctc  
142441 tttcttactt ttagtgggta tatcaaact caataaact ctcataaatt tatcttctat  
142501 catataaatt taccatcata agttcatcat tttccaataa agcattttta aaattttgaa  
142561 tataaaaatt tatagcccta ttcaaaggat aagctttatt ttcaataatg atttcttctt  
142621 gcaaaaatcc aattaatctt tgctttgctt ctttatctaa aaattcactc tcttttatat  
142681 cttttaaatc aaatacgcac aagtcaacca aaggcctaaa tacttctatc aaatcatcac  
142741 aaagattaaa atcattatag atattatcgt gctttatacc ttgccatggt aaaagtccac  
142801 ttatgcaaac cgctctaact ataagtgatc ttatgacagc atagccgtaa tttagatatg  
142861 atgggtaatt tttaaaatat gggcttgatt tgaattttg tttttaatga ttttttgcca  
142921 caaatcgct tttctttgta gtgttacttt aatttgcttt ttagctactt ttgactgat  
142981 aaaatgacct aaaaatggag aaaaaattcc attgatatga tgagattcat cgcaagttaa  
143041 aagtatgatt ttatacttgg ctagagcgct aagcaagctt gaagtgatac ttgcttgcaa  
143101 agattctagt atgataaaat tgatatcttt gagaaaaaac ttggcttctt tatcgtcttg  
143161 ttttatcaca agatgattaa actcaaggct tagttttgct tgattggata tcaatagct  
143221 tttaaaagct tcatcatagg ccatgttttt tgctcgtctt taaggcaata tcttcccttg  
143281 gtttaaaatc agccttaatt ttttctcaa gcggggttat aatgtatttt tcaaaaattt  
143341 tcaatccctg aattcctaatt ttttcagcct ttacacttcc tctttttgca tttacaaaca  
143401 atagcttttg attgtctggt aagttttcaa atttattatc atgtttttca acacaaatac  
143461 ttgagttacc gatatacaaaa ctattataat aagcaaattc gggttcttgc atatcttttt  
143521 tttgatcaa aaccaaatac tctttatgca aagaaaaaca aaactcatag ctttcatcta  
143581 tttcttgcca ttgctttgga ttgccctttt tatctttacc tgcaattact attttatttg  
143641 gtaaaactcc taaagcaaaa tccatagtat aaatagggtat agcataaaat ttattttggt  
143701 ttttaaaaat atcaatcctt accatgggtat cattttctac atattttgta cctatttttc  
143761 ttatttttcc acaatttagt gctatttcta caccttcttg tgagttgtat tttttaatca  
143821 tttcatcttt agggtaaaat gtttctttat gcaaagctcc tcttgctctt tttctaggag  
143881 gttttgaaac aaaaagcttg tttatttgat ttaaaatttg ctctctaaac ccctcaaaag  
143941 gctcaaagaa cttagcttga tgtttataac tatcatttgt aagttcttta gcataaagtt  
144001 ttgcttttaa aagctcttgt tcttttttaa aatccgaaaa agcttttata atggcatttg  
144061 tgctataagc gactattgtg gcatcaagcg cgtgatgaag atggttgttt ctatcttttt  
144121 gagcaaatcc ccaagtatgc cttaaaactg atgtaagcat tccattgatt gtttgtacat  
144181 gtattttact tcctttttct ccacttttta gatttatatc tctttttca tctaaaggta  
144241 aaaaatctaa atattctttt gtgtatttaa caataagagt tgaatatat cttgtatcat

144301 ttaaattcct actgataaaa tcttgctggt gcttgccctt aaaagcttcg tctaaaattt  
144361 ttttttctt tttgtaggga agattttgag ctaaagcttg aattttactc catctttctt  
144421 ctttgctcc aaaggcttca aaagggtgtt tattgagttt ttcttgattt tcttttagtaa  
144481 aaacccaaa cttatttaaa aaagaatcat caaaacttcg tgaataagga tatatatgat  
144541 caacctctaa agctttttca tctcttaagt gttctatgga tttttttta cactataaa  
144601 tacaaaattc tttttgttct ttccaaagt ttaattttaa gatattttta gcatttgctt  
144661 taagcccaa attttcacac tcatttaaaag cccaaatatt attctcatag ttttctttt  
144721 gctcttttc aatcttagtc ctaagctttt tactcagccc tatactctt gctaattcta  
144781 tatgaatttt atgcattttt ccatattttt taagcaaagc atttaaaact tttctatact  
144841 cgcttatagc acgatttacg ataggattgg taagctcttg tgcaaaaata ctatcgcaaa  
144901 aggcaggtaa aaaatcgaat ttttgattgt ttgattttgt tttcaaattt aaaagcttcg  
144961 aagcctcatc gtatctttt ccctctttca tcaaaggcaa gattagatta agtgctttta  
145021 aactaagatt tatatgatca ttgaaatcaa tttctattaa attcttgatt tgctcgttat  
145081 ttaaactata cttttctaaa gtaattttta atttctcatt atctttaatt agagtgatat  
145141 aagtcgctat ttgatctagt tcttccctag ttaaggaatg ctctcctagg gcttttttaa  
145201 attcgactaa ttttctaaat tcgatcagct ttgcactttc tgcattgtct ttatcatact  
145261 ttaggctttt aaatttcata ctttcatgaa gtttaatgta ttctctaaat tttttataag  
145321 tgatacttcc tttatctaag atatgattta aaatttcatt aataatctga ctcgatacaa  
145381 gctctccgct ctctttctct aagcttttta gctcattgat gatcttggtt aacgctacga  
145441 attcccaagc actatatgaa tttttacaag ctcttttttc atcttcaaaa aaagtgaag  
145501 ctctactaa atatgaaaa tctttcaaag gtctttgaaa aaatgcaact tttagaattt  
145561 cttttataaa attatcatta taagaatat cccattctt ttgttttctt aaaatcagtt  
145621 ttaattcttt ttctaaatca cttgctagaa cgcaattttc ataactgcct tctttattgc  
145681 gtatatttat aaaatctttt gtattttctt tatatttttg gaaaaattct ttataaaaat  
145741 actctcctac actttgatat ttttctaatt ttaaagcatt tgtttttaa gcgcttaaaa  
145801 ttttaccctt ttcatgtca cttgattttt tttcattttt attcatatag ccacgatgtt  
145861 ttgctatgtg taaaatcacc cttgctaaat ctttgggttc tttttttca ttaagtgtt  
145921 tataccttag ctcataagga cttacaagcc ttccttcata agctttaggc aattctccat  
145981 cgtttgctat ataactttga taatttaatt ttaattcttt tgaaataata tgctttaaag  
146041 caatcagtct tgatcttctt cttcctagtc gtcttctatt gcttcttgca ttgctctag  
146101 gtaaagctaa agattctttt gttttaggat cttcagcctt agtaaataat ctacaccac  
146161 aatcttgcaa ttgattgtct tcaacaaaag cccaacctat agagttaatc cctatatcaa  
146221 aacctaaaat tttcattcgt tctcactttt atatagtatt tatgattgat tttaaataac  
146281 attgctttca tatcaaagca cctctaacia tttaaccta ctctgaaat tcaacactct  
146341 caaatcttgg tttatccaca aagcaagatt tttcttttaa aaataaaacc tcgacaacc  
146401 ctacagggcc atttctgttt ttgccgacta aaatttcagc attttcttgc ataggattag  
146461 gaatgaaatt tctttgataa ggtttgcctt cggctttagc cttgttttca cgttctttt  
146521 catcttgctt cctataaacc tcatcgcgat acacaaataa aatcgtatcc gcatcctgct  
146581 ctatagccc actttcacgc aaatcactca tcataggagc cttatttgca cgctgttcta  
146641 aagaacgatt gagctgcgaa agtgcgatga taggcatatc aagctctctt gctaaaagct  
146701 taagccctct tgaaatttcg ctgacttgta aatgtctatc attgaaatta gaattactca  
146761 tcataagccc tatataatcg atcacacaaa gccctatact ttcttcttga gcctttaaac  
146821 gccttaaaat cgctcttaca tctgtgatag tcgcataacc actatcatag ataaataatt  
146881 tctttttaga ataataattg caagcatcgc caatgcgttc ccattcgta tcatttaaat  
146941 ccgcagtcaa gattttttgc aaaggaatgg aagtttttgc cgaaagcatt ctttgcatga  
147001 tttgagcagc aggcatttca agagaaaaca tcaccactcc cttatcctgt cttaaaacct  
147061 tttctataaa attcaagcac aaagtgtgtt ttccataacc tgggcgctg gcatgatga  
147121 taagctcccc gcctttaaaa cccttagtca tagtatttag atcttcaaat cctgtatcaa  
147181 gtcctatcac ggatttgttt tcaaggcttt tttgtttttt aaattcttcc aaaagctcgc  
147241 ttaagactat ttctatatct ttgatatcgt tgggttttac acgattagt atgttaaaaa  
147301 tttccttgcc gatttcatca gaaatttcac tgactgcgag attatcattg atccttgttg  
147361 gcaaaagatg ggcaaaactt aaaagctgtc ttttaatcga cttttcgcga agttcattga  
147421 cataagcggg aagatctatt atcgaaggag ttgcgataat ctcggttaaa atttgctcgt  
147481 ctattttttt atgctttttt aaaaagctaa tcgatatagg ctctccagca ttcacacaag

147541 caataatagc tttaaaaaca tcctgatgag ctttaagact aaaatcttta ggttctatat  
147601 ctccctgctat gctagaataa gcgtcctcgc tcataataca actactttaa attgvcgctt  
147661 ctaaaccctc atcaaatgc tcttgctgca cctatcttc ttttttgagt aaaatttatt  
147721 gaaagatttt atctaaaaga atctaaaat tcacataagc tttttataaa aaattaaagt  
147781 aatattagtt acaataaaat tataatttta atcaaaaact atcaaggagt ttatcttgaa  
147841 aaaaacctta ttttcttttg ctttggcctc tttatttgta agtcaagctt catccataga  
147901 atttcaaagt ggtccttagcg gaaatttaag cttagggata ggagcaagag atgtttaaag  
147961 caatatctca cctctagcaa atagcaacta tctaggtggg tataacgcta aaaattccga  
148021 tactgctgcc atacctttta taggtcttga gctttattat ggcaatttaa tcgataatga  
148081 tagagtattt cttaaaaact ataacggaag agatttaagc ggtattgctt tgggttatga  
148141 aagagcttat ttagaacgct ttagcacttc ttttctttc atttcatctt taagagaaaa  
148201 agcttatgct aatccttatt ttataggtaa tcgtgaagaa actgatgtga gtaaatacgg  
148261 ctttagaatt tcacaacttt acgaaagtga ttttggaaaa ttcaatgctt cttatgtttt  
148321 tgcaaaaaac aaactagata aagaaagtat agaatttgat tctcttaaac gagagggaaa  
148381 ttatcatgag ttagaattaa gctataatta ttctttatta aacttaggct taatctatga  
148441 ttataatgac gctgatggaa aggctcaaag ctactcaaga tatggcttta aaataggcac  
148501 acatctagtt tttgcaagaa attatatcct aactccaagc ctaagcttaa atcaatacaa  
148561 agcagatggc acagatccta tttttaacca aaaacaagat ggtagtatca caaaatttaa  
148621 tctcaagctc gtaaaaaatc aattcttagg ctatgactca ctttatggct ttgtaattaa  
148681 tggcctagaa aaaagaaata gtgatataga tttttacgat gaaacatacc acatcttgct  
148741 tacaggtgta ggatataaat tctaaaatca atccaaagaa actatcatca taaaaacgat  
148801 agtttcttaa agacttttct aacaaaaata caagctaaaa tcaaaacaca aagttcagca  
148861 aaaaatggac taagccatac tcctttttaa ccatgatag aagataaaat caaaagaaaa  
148921 caciaaggaa taaaaagatt ttgactcaag cttaaaatca aagaaaaact cgctttattg  
148981 ctgctgtta aaaaagaacc acttaaaaca ttaaaccacg caaaaagata attaaaagaa  
149041 aacaacatca aagccatata agcaaaaatg ataaattctt gatcaccttc ttgagtaaac  
149101 aatcctacca aatccttacc gcaaacaaat atcatcacga tagacagcaa agacaaaatc  
149161 gcaccgcaa aaaacattac ctttaaaata tctttaatcc ttgaaaaatc ctttttagca  
149221 taattataac ttaacgcagg ctgcatcgca tcaccatag cgataataag cataatgata  
149281 aaattatcaa tatacgaac gatagaaaaa gcagcaaccg cttgagtgcc tgaattttt  
149341 aataaaacta aattggcaaa tatgccatat aaagaacctg agatattgcc aaaaaattca  
149401 ctgcttccat tataaactat atttttaaaa atcttcatat tcatatacaa acttgagaat  
149461 ttaagctcta aattttgaaa taaaaaaggg aaaattccaa aaataaccgc tagcataagt  
149521 cccaacaag tcgcaagagc tgctgaaaac aagcccaac ctaacacaac gatgaaaata  
149581 taatcaagca ctatattact taatgctata atcacattca tcatcactact ataagttggt  
149641 tttccacaaa ttctaagata attatccaaa gcaaaagagc acatggtaaa ggggtgcaaac  
149701 aaagcaaca caagcataca ctcttttgcc attgatttga tatcttcact tacatctaaa  
149761 aaattaatca aaacaggact taaaagatat tctaaaatgc ccaccaaca tgaataaaga  
149821 aagataatta acatactaga gctaaagatt tttctagcta aatgtttctt cccaagtcct  
149881 aatgcatag aaatttgac agctgaacca atggctatca tatcagcaa agcaaaagat  
149941 atcataataa aaggaataat caaggccaaa gccgctaaag cgtcatttc tagatatttt  
150001 ccaacaaaaa ttccatcaac aatataataa aaagaaataa atgccatgct tattacatta  
150061 ggcacagcac atttaacaaa aagcctaaaa gggcttaagg tgctaaaaat atttgacata  
150121 aaaaatcctt taaaatattt aacaatacaa atatcttaa aggagctaat agagtgttg  
150181 aagtcctagt atgtagaaag ctaagcgata ggtttctatc ggtatgattt ttttattggt  
150241 tttgttttgt gtttgcataa taatatttaa aaattaaat ataataaaga aattataata  
150301 ttgaaagttt aataagtcaa atttagccca agggccaaat ttgattaaat tacggcaagt  
150361 atctttacag cgtcatttaa gcctgttact atgcttgccg catttttagt tgcaatatct  
150421 cctgctacaa aatgccttt tacattgctt tgtttatttt catccattaa aggaactcct  
150481 ttatcatcga cattgattcc gcatttttgt aaaaaatcaa gaggagtaga accaccgata  
150541 gcataaatga ttctatcata agtctcactg ctgccatcgt taaatttcac tttagcttta  
150601 ccattatcat cctcaagctc ttctatatct ataccgagtt ttaattctac tttgcctgaa  
150661 tttccagctt catgaatatc ttttaagattg atatcattta gccttgtaaa ttctttcttg  
150721 cgataacaaa ggcttacttt atttgagttg gctaaatcca ccgcatattc tgcagctgaa

150781 tttccgctc ctacaacaag aatTTTTTca tcacctaaaa cagaattagc attgaaatta  
150841 ataatctttg ttaaagttcc aggaagtTTa taatcaggct tattaggctt acccattcta  
150901 cctatagcaa cgatgatatt tttacactca taaacaccct tgcctgtgct tactaaaaat  
150961 actccatttt catttttaac actctctact tcagagccaa attcaacttc tatattatgc  
151021 tcatttaaag cgTTTTgaaa agtttctatg gtgctttctt tggttccatc ttgaaaaggg  
151081 acatgtccgt gatttgtccc ttcacaaccc ttataagcca tatcaactct tttaccatct  
151141 ttgtaaaact gcatcaaagt ttgacaaata ttgtttgatt tctccaatac caaaacttct  
151201 ttatttttaa gcttggcttc aaccgcacaa ccaattcctg tcggccctgc gccaaactaca  
151261 attaaatcta cttttttcat tcaaatttac ctttcaattc taaatTTTT tgtataatTT  
151321 atcaagtttt ttgtaaataa aggattaaaa atgcgaaatt tacttgaaaa tattaagaaa  
151381 aattctcaaa aattgctcaa tttaacaccc aaagataaag aaaatattat attgaaacta  
151441 gctcacactt taagaaagaa tttcaaaacc atattagaat ccaatgaaaa agatataaca  
151501 aatttcacca aaagtggagc aatgcgagat aggcttttac tagatgaaaa acgcattttt  
151561 tctctttgtg atgctttgga aaaaattgct tatttagaag atcctatagg taaaatttct  
151621 aaaggttggg ttaattatgc gggcttaaag atagaaaaaa tcagcattcc cataggacta  
151681 atcagtgtaa tttatgaggc aagaccgagt ctaagtgctg aaatcattgc tttaatgata  
151741 aaaagctcca atgcttgcgt gcttaaagga ggcagtgaag caaaatttac aaattcggca  
151801 atatttgatc ttgtttataa agtactagaa gagtttaatt tgcaagattg ttttgctatg  
151861 ttttatgaaa gaaatgagat catgcaaatt ttagcttttg atgatttaat cgatgtgatt  
151921 atccctcgtg gaagtTcaaa tatgatacaa gaaatcgcta gtcatacaaa aattccactc  
151981 atcaacaag acaaaggttt atgccatgct tttgtagatg agagtgcaaa tttaaatag  
152041 gcttttagaaa tcatccttaa tgcaaaatgc caaagagtaa gtgtttgtaa tgccctagaa  
152101 acccttttaa tccatgaaaa aattgctaaa gattttatag aacttttaat ccctgaatTT  
152161 gaaaaattta aggtaaaaat tcacgcacat gaaaatatct tagaacattt taaaaactca  
152221 aaattagaaa tttcaaaggc tgatgaaagc acttttgata ctgaatggct tgattttgct  
152281 atcagtgtaa aatcagtaaa agattgcgat gaggctatag agcatatcaa ccaacacagc  
152341 tctttacact ctgaaacat aatctcaaac aatgctttaa atataaaca aattcaacgc  
152401 cttctacgct catcttTgat ttatgtcaat gcctcgactc gtttttagtga tgggggtgaa  
152461 tttggctttg gtggggaagt ggggaatttcc acaagcaaac ttcatgcaag aggtccaatg  
152521 ggtgttgaag atatttgcac ttataaatac ctaatcagcg gagaaggaca aataagaaaa  
152581 tgagtaaaag aaaaatttta aaacaacaat ataaagaaat catacaactt aatccaactg  
152641 aaagagtttg gcaaatgcct tttttctttg ctttagcagt tggatttgca cttagtattg  
152701 ctgcatatta tgagcgtatg gacttgggac taatcgctat gataggaatc atggcttttg  
152761 tttatacaac caatacacct atgtatcata gaatggctgt tacaatgtgc tgttcttttg  
152821 gtttTgtgctt atctttttta ataggacttt gcaccattt ttttctcgcg ttttctccgc  
152881 ttataaattgg tctagtggct atggctagtt ctattttgat acgctattat aacataggcg  
152941 ctccggggta ttttttctt gtttttctt gtttattggc ttcatttttt cttttccag  
153001 caaaagatta tatttttcta gtgggattga tttgtatagg tggcatcatt gccaacatag  
153061 ctgctttttt atactctgta tctgtcattt atatttttaa aaattcccca cccaagcctg  
153121 ttttgcaaaa tgggaattta ggctttgata ttatctttgt agattctata attattgctt  
153181 tttttgtcgg atttgctgta tttctaggag catttttaga acttgataga agttattggg  
153241 ttgcagttag cacgactgtt atcttacaag gagctaattt aaaatcagtt tggataaaac  
153301 agcttcaacg cattcttggg acaacggttg gaattttatt tgcattgggtg cttttaaaaa  
153361 tcaaatttac tccttttagaa tttgtcttTgt tgatgatgtt tttggccttt ataatagagt  
153421 ttttggtagt tagaaactat gccttaaccg taatttttct tacccttat gtgacttatt  
153481 tagctgaagc agcttctttt ggaaatttaa gtgttgatat gctgatacac gctcgcttgc  
153541 aagatattat cataggtagt cttttggggc ttctaggggg ttttgttatc cataaacctt  
153601 atttaagaaa atattttgaa tacattgcaa aatacatttt tagagtaaga ttggcaaaata  
153661 gataattctt ttaaaattca gcttttaagc ctatgcgcat taaaagctga aataatatat  
153721 tttaaaaatt cctgtataaa tatcttaatt tataaaagct taaaaattt gatattttatt  
153781 tattagctct ttcaatatac tccccgcgca ctgtatcaac gcgtataact tcaccttcta  
153841 aaacatgaaa aggaatttTgt acaactgcac ctgtttcaag tgtagcaggt tttttgtttg  
153901 aaccttgagt atcgctttta aaatttggag ctgtttctac aatcttaagt tctacaactt  
153961 gcggaacttc cacgccgata gctttgcctg tgtgaaaaag tacatctacc atcataccat

154021 caagcatcca tttttttgct tcccctacat cttcatcact gattgcaact tgctcgtgtaag  
154081 attctgtatc cataaattgg caattttcac catcatcata aagatactgc atggtttttt  
154141 cttccaaatt tggagcttca cttttatctc ctgctgtaaa agttttttct aaaaccttac  
154201 catcaataaa agatttgatt tttatacgca caaaagcagg accttttcct ggttttacat  
154261 gttgatattc aactatttta aaaggaattc catcgatttc gattttaagc ctttttttta  
154321 aatcacccat tgaataagat gccataaatt ttccttttta tattaaaaat aaattataat  
154381 ttttaacaaaa attatttgat atcacatat aattgataat aaaataagca tttttttggt  
154441 agaatttagc tttaaagcat agtaaagct cgcttcttta aaaagaagag gaaagtccga  
154501 gctgcgaaag acaaacattc catctaacgg atggctaggg cgacctagg gacagtgcaa  
154561 cagaaagaaa actaccacga aagtggaaaa ggtgaaacgg tgaggtaaaa gcttaccagc  
154621 gattttggca acaatttcgg ctatgtaaac ccaatgtgca gcaagaaggg atggttaagg  
154681 tctttatttt aacccttcgc ttgattttgt ttgcgaaaac aaaactagat aatgagcat  
154741 tctagacaga actcggctta tcgctatgct ttaaaaattt taatctttga aatattttta  
154801 agctttttga attttttgaa tttcacaagc tttagaattc tttttttcac ttattaaaac  
154861 aaccgcttct tgtaaaagtg ctttaatttg acttaaatca tcatttagtt tatcttttaa  
154921 ctcatcactt tgaaaatctc ttgcaagatc ttcaagcatt ttttttaaat caagtgtatt  
154981 tagcaagcct tcaagcttat tgacatctc ttgtatgagc gcgagtttaa aatcactaag  
155041 ccattgcttc attgctatgc acttctctcc aagcttctaa caagccttta gttacattga  
155101 taacctcatc aatccttgct tcattatttt ctaaatttgc caaagataaa agttgaaatc  
155161 ctcttgata aagaccgcta agataatgag ccacttcgcc acctttttca taatctaaag  
155221 tattgataag ctctataaaa atagccgtag ttctttttac aaaatgcact ctttgttcta  
155281 tatcttcggt tcttatcgct acttttagccc ttgagcaaaa acgcaaaatt ctttcataaa  
155341 gcatttcgat aagtttttgc ggagattcta tccccgcttg attttgagaa taagcattgt  
155401 aggctaaatt attttgcatg atttatcctt aattatttga attatttgct gcattaatca  
155461 tatttgtaac agtagtgagt tgttgattaa gcttatttag aatactttca tattgtaacc  
155521 attgatttgc catagtttca tacctagtat ctatcagttt ttgagctgat tcttttgact  
155581 cagtaagagc ttttgatca ttggttaaac tttcatcata ttttgttaaa gaaccatcag  
155641 ttcctgttat accttgtaaa gtcgttttaa gctgtgcaaa aacacctgca ccctcaacag  
155701 cttcagctgc tatagaaact tggctcaagc caaattgctt aagaaaatca ttatcccctt  
155761 taatcgcaaa gtcagcattc ccatctgttt taaaattaag cttaaaacct gtttctccat  
155821 tttgattata agattcaacc tttacagtta aacctcaat ccctttgcta ttgatattgg  
155881 cggctaaatt ctgaagcatt tcttgttctg ttgcaccact taacttaaaa gctgttccat  
155941 cggcattttt agacaaatca taggtttcaa aatcacttac aatttgaaat ttgcccgaa  
156001 caaagcttat gccattatca tcgccttcta ctttatttaa ataattttca agactgcct  
156061 gtttaatcaa ttcacccgta tgatttatat ttttatattg agtaataccc gaaaaaagc  
156121 tctcggccat agctgtatct tcttttacct tgctttcaaa ggcagaagaa tcaaaattta  
156181 aagttcctga ttctgtcata cttaaaccat aatcttgcaa agaaagcata acctagcgc  
156241 ttactttatt gccgctagca tcttctactg ttccatccac tgattgagat tgaaaaagta  
156301 tcgaaacaat acttgaacgt atagaattta cctcagttac accctgtaaa gatcctttag  
156361 ttccagttc gctgttataa tcggttgctg cgttaagatt taaaactaaa tcattataag  
156421 catcaacat ttcttgcata gcttgagtga tagactcgct atcttgctga atatcaaaat  
156481 taatttcacc cgttttattt aaagtcaagag taattcctac accaatatcg gtaatagtat  
156541 tgctcgatct tgcacatcta atgccatcca tggtaaaatt agcattttga gcttgttgga  
156601 tatgtaaagg attttcagca tcatctataa tacctacgcc ttttttactt gtagcaggat  
156661 caaaccttc tgcatttaaa gcattatcat caagtgtcca acccaaactt tcaaaaacac  
156721 tttttgcatt ttcatctact gcatattttc cgctactatc tttcgcacct ggataaaaac  
156781 ttatggcact atcttcgcct gtttcttgc ttgtcaaagt taaacgatat ggagtgtctt  
156841 tttcgcctgt atttaccatt ttagctacta tttctccacc tgtagcacta ttgattttat  
156901 ctactaaatc gctataagtt gtatttttat ctatggttac agtgatttct ttacctttag  
156961 aaaaaaaggt taaattgggt gaactttcca aatttgcatt gataaacctt gtatcatttg  
157021 ctaagccttt gctttgataa acatcttttt gtgcaagttg agtaacattg atattcatac  
157081 tttgcaaggc cacaccgaa gtagctgtaa gacttgcagg aggattatct gtaatacttg  
157141 ccacaacctt tctcttagca aaagcagtag catctccaa agaagaaacc gcgctttgaa  
157201 aagtagaaa gtttagttta atctctgtta agtctttttg ttttgttgta ttttcttcaa

157261 tctttgtagt ataaggatta acacgagctt gttgctctgc ttcttttaat ttatctatag  
157321 tttcttgtgt taaaaccctt gatccaaatc ccaaacttga taaactacca aatgccattt  
157381 taactctcct tatcaaaaat cataccgatt acatctctaa agtattcagc caatctcata  
157441 gcttcttcgc taggaatttg acgaatttct cttccggtac ttttctctgt cacgcttata  
157501 tacattgaat caattttatc gctatatcca aatctgacat tagtatctag cgaatccatt  
157561 tgctcattta attttcgcac aatatctgtc aattttattgt tcaaatttcc ttgctgttta  
157621 tcatcgcctc cttggctttg atttcctcca gcttgaatat ctgaattagt ttgatgcgct  
157681 ccacttgctc tttgagctaa attcgcaaaa gctgcatcta actgcccatt tgcctttgat  
157741 atttccattt taaaatcctt tttaaaattt aatattgctg tttaaaggct atatcgacaa  
157801 aattataaat ttatgaatac tttataaaga aaaatctatt tttcattaca aaaaaataac  
157861 aagcaaaaag tgtgccaaaa gttatcaaaa agctgaattt aagatagaat tagcctagaa  
157921 tttcaaattt tgaaaaaagt tctgagttat tttccaaaat atttcttaaa atcaaatcct  
157981 caatcacgct tttagtacaa tcagtttggt taggccaaac tctttcataa ccctccacta  
158041 agccttttagc agtagcatca atccctactc tatctgcttt aataaaaaata tctcttttag  
158101 cgtctatatt gtttaccacg cgccatacaa gcatataagg attttcgagt ttgttattgg  
158161 tatctaaaaa tactaaaatt ctaaaatgct ttttaaattc caaaagcttt tcaaagcttt  
158221 gctctatttt ttctttttta tctagcaaaa taaaaactat aggactttta ctttctttgt  
158281 aaaattgctt taaattaaca agctctattt tggttttaaa aagctctaata aatttttcat  
158341 cttctaaaat ttcaagctct tctactatgg tttcttcaca agcatcaagc cctgcctttc  
158401 ctccaaagca agaattaggc gaagcatgat ctaattgatc acaaattcct tcagagatta  
158461 aaattttatt tgcattaaaa cgatttaaaa tataagggtat caatgcatca taatcatcta  
158521 aatttggggc tttcttatct acaaaaatag catgcttaac aaagctcatt tgtcccactc  
158581 cccaaaaagc atgcataatc tgctgtgcat gagcaggata ttttgcatca atttttgcca  
158641 agataagatt atgaaaaacc ccattttcag gcattttata atcgattaaa tcaggaactg  
158701 aagtttgcaa aaggggtaaa aatattcctt cggttccaag ccccatgatc ttatcttcta  
158761 aaggaggttt tcccacaaca gttgcttgat aaatagcctc ttttttggtg taaatttttt  
158821 ctaccttcat cacaggaaaa agctctgcag gagtataaaa acccgtatga tcgccaaaag  
158881 gtccttcgat tttaaattct tctaaatcca cataaccctc gatcactata tcaactatcat  
158941 aaggtacaaa aataccattt tcacaagggtg tcagtttggc tggagttttt ttaataaaac  
159001 cataaagtaa aagttcaaaa attcctttag gcaaaggagc ttgagaacac caaatataaa  
159061 gaggatcccc gcctatggct atacttacag gcattttttt aaagccagca tttttatact  
159121 cgtgataaaa atttgcccc a tctttatgaa tttgccagtg cattaaaagc tcatttttat  
159181 cgctaacttg taaacgatac atgccaaagat tattttgagt tttatccaaa ttttgtgtat  
159241 aaacttgccc catagtaata aatctaccgg catcttcttc ccaagtctta agtataggaa  
159301 gttcttcaag agaatttaaa agctcataat catacaaagc tttatctgct tttaatcttt  
159361 taggtgggac atttttgaga ctttaataaat tcataaaaaa atctattttt gctttaaaac  
159421 tagtaggaat atgaagcttg gttagctttg aaatttcatc agccacctct ttataatctc  
159481 gtccgaaagc caaatttaat gctttttcat taaaaaaagc attcatcaaa acaggaaatt  
159541 tatattgttt attatttcgt ttatctacag gatttttaaa aagcaaagcc ttaccatttt  
159601 cacctttttt agcttctata taagctaaat gggcgatttc aagatctata tctacagggt  
159661 cttcatacac ttttagcaaa tcattgtctt ttagaatttt aataaaatct ttcatatcat  
159721 actttcagct tttttcagaa tttcttttagc tcccttggcg ataaattcct ttgctaaact  
159781 ctaccaaaag cttttaaatt cgcttttttt aatcattctt ttttctttta aaatttctact  
159841 accatcaggc aaaccaagta tggcgcgcac acaaatctca tcatttagaa gttctgcatt  
159901 aataccaata ggcacttgac atcctccttc taaagtagcg ataaattctc tttctatggg  
159961 agtttctatc aaagcattgt catcatttaa acactttaa aattctaaaa tttttctatc  
160021 atctatactc tctataccca aagccccttg agatgctgct gggattagct catctttgct  
160081 aatgcataa acaaaattca cttgtttatc taaatccaaa cgcttaatac ctgccatagc  
160141 taagataatc gcatcaaaat cccattttt taatttttct atacgagaat tcacattgcc  
160201 acgcaaggaa ataatttcta aatcaggctt taataataaa agttgcattt tgcgtctaag  
160261 gctttagtagt ccaatccttg caccttttgg caaagaaaga aaatctttat aattttgact  
160321 taacatcgca tcattgcttt gttctctttt gctgatcgca gccaaaacca aaccttgagg  
160381 aaaaaaactt ggtacatctt ttaagctatg cacagccaaa tgtgcttcat ttcttaacat  
160441 actttcttct agctccttgg taaaaagccc tttaccctt atttttgcca agggactatc

160501 taagatcaca tctccttttag ttttaaaacc ttctaaacga actgctatgc catgagtttt  
160561 gcttaaaaaa tttgctataa attcactttg ccaaagagct aattggcttt ttctttagc  
160621 tatgacaagt tctttcattt tttctcctct atgatttcaa catcgataat ttcttcatca  
160681 gaagtattat tttgcctata gtttcttttg tatctaggtt tggcaaagtt aaaaatcaag  
160741 ccaaaacata aaacaaaaaa tccaaaaatg ctcgttacta ttcctggaaa gataaacaaa  
160801 aaagccgcca ttataaaagc aaactgggta agcatatfff taaaatcact tatacgaaac  
160861 tcaagcatat ttttccaaaa aattccaagc aaaattactc caaaaatcat actagccaaa  
160921 ataaaaatta aaaaatttcc caaaccaaaa aatacgatea ataaaatact tgcaacaagt  
160981 tctaataaaa aaagcggact aaggctgagc ttgtaattca ttctacactc tttttaataa  
161041 aatcaaaagc ttctttactt gatagaattt ttttctctag tgtttttcta tctataaatt  
161101 ctagctcatc cttttctaaa cccttaccba caaccaagc ataaggaaag ccataagct  
161161 caaaatcatt ctttttgacc ccaaaacgct catttctatc atcaagtaaa acctcaatac  
161221 ccacattgct taaatcctca taaagtttgg tagcaaattc taaagacttc tcgtctttga  
161281 tgtttgaac tataatttca agtgtaaaag gagctaaggt tttattccaa atacaacct  
161341 tctcatcatg atttgcctca atcgctactg caagtaagcg tgaaactcct atgccatagc  
161401 atcccatata aaaaggcttg cttttgccat tttcatctaa gaaatttgca ttcatagcct  
161461 tagaatattt ttgtcctagt ttaaaaaat ggcctacttc tatacccttg cttaatctta  
161521 attttccacc acatttagca caacaatcat tttctttaac ttctgcaaaa tccttaaaac  
161581 gatccttgtt taaattaacc acatcaatgc ctatcaaagc ataacttttt tcattingctc  
161641 ccattatcat ttgtttttcg ctttcaagct ctttatctaa ataaaaatca acatttttca  
161701 aaccacaaa gcctataaaa cctgcaacca atcccgtttt ttctaattct tcttcgctcg  
161761 catctacaag ctcaagagca ttgcaagcgt tttgtgcttt agtttcttgt aaatcatcgc  
161821 aaccgctgat aaaaaatata actaatttat tttcattttc gtaaatagct ttttttacta  
161881 cagctttgat agtataaaaa gcattgattt tgaaaaattg tgctaaagct tctatgggtt  
161941 taacatctgg agtgtgaaat ttacttgtat aatttgcctc aggagcctct tcatcgcaag  
162001 ttttattggc tctaattgca gcttcaacat ttgcagcata atcacaattt tcacaaatta  
162061 aatatcgtc ctcgccattt tttgcaaaa ccataaattc tttagaacca cttccgcaaa  
162121 tcgctccact atcagcatca acagctctaa attctaaacc cattctttgt aagatttgag  
162181 aataagtctt atgcatcaaa tcaaattcac gcgttaaact ctcttcgttt gcatgaaaac  
162241 tatagccatc tttcattaaa aattcacgac atcttaaaag ccaaatctt ggtcttgctt  
162301 catcgcaaaa ttttagccct atttgataca aatgcaaggg aagttgttta taagatgtga  
162361 ttttattttt taccaagaa agcatagcct cttcatgcgt tggacctaga acaaatcat  
162421 tttcttttct atctttaaaa cgcaaaagct ctttaccaaa aacattataa cgcccacttt  
162481 cttgccataa agttgctgga gtcacaaagc tcaagcttac ttcctgcgct cctgctttat  
162541 ccatttcttc tttacaatg gtgcgaattt tatccaatac tttttttccc aaaggtaaaa  
162601 aattataaag cccgctaccg atttgctcaa caaaccagc acgtgttaaa aaaatatgac  
162661 tcggtaaagt cgcacttttt ggagcctctt taagacttgg tgcatataat ttgctaaatt  
162721 tcatcattat tctccatatt aaattcacat gcgtattgat ttaaaccctc aagattgttt  
162781 tctaaagcaa aatatatacg catagcatta atcactgtat cactttgcat tttcccttgt  
162841 agatgcttta aatttatagt tggagtatgc aaaaaagcct taaatacttg atggattaat  
162901 tttcttgctt cttcttcatc agaatgtttt aaatatcctt tatctaaagc gatctgaagc  
162961 tgtttgtag cacattcttt tgcttgcaag cgaatcgctt taataatagg agttaaagct  
163021 aatcatttta aatatctaaa aaattctgcc gtctcacgcc cgatgatacc atacgcata  
163081 cgcgcttctt gttctcttaa agccaaattg tttcgcacga caacttcaag atcatcaact  
163141 gcaaaaacag atactttttc attttgcgtg acatcaatat ctgcggttac agcaatatca  
163201 aaaaaatatc tcttatgaga aacctcatcg attaaagaat ttgtaataat agcacttgaa  
163261 gcattggtag ctgagaaaaa aagctcgtat tcatcaagat atttttttaa attatttaaa  
163321 ctatcgact cacttaaaac acccaatctc tcacaaagaa tacgggcttt ttctatatct  
163381 cggtttaata ttataacctt agctccagca gcgattaat gcttggctgc aagctctccc  
163441 atctcacctg cacctataac tatagcactt tttccctcta aaggcaaaag ttcttttagct  
163501 ttggctactg ccacgctagc aacggaaata ggattttttg aaatttgagt ttctattacga  
163561 accttagccg cacatttaaa tgcactgtga attgctcttg aaagatgtac tgcacaaaaa  
163621 ttatttttta aagcaaaagc aaaagcatct ttttaattgtc ctgcaatttg tgtttctcca  
163681 acaaccaagc tatcaagcga acttgcaact gaaaaaagat gatgaatagc tccgctatct



163741 tcgaaaatat cggctttttg aaccaagcct tctttgtcta cattgcacaa taaagctaag  
163801 gatttgatga tatattctgc acaagcttct tttacgtaag ctactatttc tacacgattg  
163861 caagtgccta taaccaagca ttcttcaata ttttcatgaa tgcttagcaa tctcaaaaat  
163921 tcattttttt tcgcctcatc agaaaaactc aatctctctc ttaaagagat atctgtattc  
163981 ttatgggtaa aagatataca ataatacatt aaaaatccct atctatcata gcttgaatta  
164041 taccttggag ttgttcatta gaaaaatcct ttatggctaa tgctgcttgc tgggcatatt  
164101 ctttagcttc cgatatagct ttatttaaag cttttgtttc ttcaaatttt atttgcatcc  
164161 atgttttttc atcattgttt aaatcttttt gaaacaaatt ccttagctga gtcctatcct  
164221 catcatttaa attttcacaa agataaatat aaggcaaagt ggttttacc cttttgaaat  
164281 cattcatagc aggtttacca agggtttttt catcaccctt gatatactaaa atatcatcaa  
164341 tcatttgaat tgcaaggcct aaatttttgc catattcccc aaaagctttt tcatctaatt  
164401 ttgccaat agccccgcac cttgcacttg cttcgattaa aactgcggtt ttattataaa  
164461 tcatcttag atatttatct ttatctgcat taaaactttt gctaagctca acatccataa  
164521 gctcaccac agcaagctta acaaccgat ctgaaataat acttgcaaaa caagcatcta  
164581 gttggctcaa ttcataaaaa gcttttgaat ataaaatct tccaagcata agggcgtttt  
164641 ttgtaccaa ttcagcatta acagactttg caccgcgtct taatttgctt tcatctatga  
164701 tatcatcatg caacaaactt gctaaatgta tgagttctat tgcggcacia attttataag  
164761 aatttgctt ttctcctgca attgctaaaa gtaactttga acgcaatttt ttgcctgatt  
164821 tggatttagc aagcatagtt aaaacaggct cataatcaag ctcttgcaaa tattgtttta  
164881 tcaaatcatc tattggttgc accctatatc cttcaaattt agtttgtggt attttctcgt  
164941 tgtattaatg gttttacttg aggctcatta aaatctatca taggcactac ttgattattt  
165001 tgagggtgat ttgttaattg ctttttctt ggatcaagaa atttcacttc gagtctagaa  
165061 tccttatctt ctatatacac agtaaaaatt gcctcgcctt ttttgtattc actaaattct  
165121 aaaataagtc ttgctctatc aatatgtgga tttttataat caggaattaa agtttgagtt  
165181 acccagtcca aatttcttct taaactcatc acaaattgac gcggatattt gcgaaattta  
165241 gaatgaacga ctatattggt attatcaaac aaagtccaat aaaaatcgaa attttgaacc  
165301 ccattatcat aaccaagctc tttaatctcc acgctagctc tctcatcttt ttttaagtga  
165361 aatttatatg tataatcaaa aacaggagcg gcatttaaaa caatacaatt tgccatcaaa  
165421 gcaaaaaaaaa ccaaaagcct aatgctcatt agccctcatg tcctaaaatt ttagcaccta  
165481 attctataaa aaggtcattt tgcctttctt gaataaaaatc tccattttca agtataaagc  
165541 ttttcacatc catttcattg aaacctgtt tttctaaaag ctgatcata gcaatatgat  
165601 cagcaaaaaa gttttcaaat actttttcta aggctcctaa atttccattt tgtataattt  
165661 ctataaattt ttccttagga gttttattaa acatttcgctc aaaaatatcc attgaatttc  
165721 cttataaat atgtttttga ttataaaatt ttaatcgttt aaagtagcta aattaaaaaa  
165781 tgaaaaagtt taaaaattta ttttaagaag caataaattt gggaataaac ccaatttat  
165841 ttaagaatga gcttttagtt cttgtgcgta tttaacacct aaatcaaaag ctttagaatt  
165901 tgcatctctt gttttagctg gaaccatag aagcatagtt tctttaagaa tatccaaatc  
165961 aatacattta ctcatataag cggcaatagc caatgcaaca actgattgag tagccacatt  
166021 acctacttca tcttttagcta tagtaatgat aggaatttca aaaatttgcc attttttata  
166081 atcttcgctt tcaggatgaa ccaaattcgg ctctacaact atgataccac cctcttttac  
166141 tccaccgcga aagcctttgt aacccttatc tgcagttgaa agcataaagt ctacttcgcc  
166201 ctctactgca taaggaaaa gaatttcttt atcatcaatg ataatacaaa ccttagttgg  
166261 acctccacgc acttggaag tataagttga agctttaaaa gcttgacgac cttctttgat  
166321 cgctgcttca gctaaaattt ctctgcggt gataaacctt tgaccaccct caccacaaa  
166381 tcttaattga tatttcattt taaggctcct aaatcaacca tctttttttc tttggctgca  
166441 cgacgcactt cttcataagc atgacaatat tctggctgctg tgctatcttc atataaaaaca  
166501 cctgttggga atttgtcttt tctttcttca aaatccatac tttcaaattt agacttatcc  
166561 acaacacgat ttttaatcca atcaagcata gccactgctt caccattttt attttttcta  
166621 cctaggttaa tatggcagtt tgagaaaaca tcaacaaagc tataaccttt gtgtgctaaa  
166681 gctttataaa ttaatttttc taatttattt gcctcaataa ctttctctt tgctacaaaa  
166741 gaagctccag cagcttttagt taattcacia gcatcaaaat ttggatcaat atttccaaat  
166801 tgcgcagtta ctgtataaaa accttttggg gttagttggag aagtttgaga attagtaagc  
166861 ccataaataa agttattaat tacaatatga gttaaatcta ttttctacg acatccatgt  
166921 atagtatgat ttccaccaat tgccaaagta tcgccatcac cacttactac aataacatgt

166981 ttgctaggat tggctagttt tatgcctgtc gcataagcaa tagctctacc atgagtagtg  
167041 tgcacgggat tgcaatttac ataagagctc attctaccgc tacatcctat acctgaaaca  
167101 agacaaacat cgtccatatt ccaaccagc ttttctatcg cacggataat acattttaaa  
167161 actacaccat caccacaacc ccaacacat tgagtaggaa gtttatcagt tcttaaatat  
167221 tcatcataat taaatgcat tttatatatt ctctttact ttagcaatga tttcgctagg  
167281 tgttatagga cggccatttg cacgatgtaa gctaataaaa tcacgacgag aacttactct  
167341 ttcaatctcc tcaagatatt gtcccatatt taattcactt accattactt ttttaaattt  
167401 gcttaccact tcagcaatth tcttttcagc tacaggataa agcgtgatag ggcggaag  
167461 tcctaccta ataccttctt ctctaagtct attgatagct tcttttagcag aacgacttac  
167521 gcttcataa gctataatta aaaactcagc atcatcaagc atatactctt cataagtaca  
167581 aatatcatct tggttattht taatthtacc tataagtctt tctatgtht tcttaactat  
167641 agcgccatct tctgttgga aacctatct tccatgatga agtccagtta catgatagcg  
167701 gtagccagta aaaaatggat tgagtgttg aggttcgtht tcgcccgcg cataaggtht  
167761 ataacttht ttatcgcctg tgaattht acggttaata atthtctat cthttaaact  
167821 aggtaatacc gctttaccat tcatatgccc tacagthtca tccataagta aaaacacagg  
167881 agtcatgtat thttcagcta aatthaacgc tcttatggtt tctgtataag cthtcttag  
167941 gctcgtggt gcgatagcta cactggcaa atccccatga gtaggtgctt ttgcttgaaa  
168001 caaatctct tgagccacc ttgttggaag acctgttgaa ggaccaccac gcataacatt  
168061 tacgataaca agtgaattht cagcgataaa cgcaagaccg atthtgcctg cthttagtga  
168121 aattccagga ccactactg cagtcatgta thttacaccg ctcatagcag caccgatagt  
168181 cacactcaca cctgaaattht catcttccat ttgtataaaa gttccatcat ttgcaggaag  
168241 catatggctt aattcatgtg caatthcaga acttggtgta ataggataac cccccaaaa  
168301 thtacatcca caatcaatg ctgctthtgc aatthaaaca thacctgtht ctataacttc  
168361 tctcattgtc thtctatgc taatthttht tathtattat thtttactgc tacggctcta  
168421 tctthtagcct ctggagctag thtggaat thaaattht ctctthtgc caccataata  
168481 gcaaatctg gacaatgtgt thcgcactca gtacaaccta tacaggactc aggggtgaca  
168541 acctctatca thtgtccaa aaccgcatga acatcatcg gcatagctaa aaccctgca  
168601 gggcaatagc taacgcagat attgcaagct thcatctat gctcatctac ccaaacaggg  
168661 gtatcttht gagctgctat actcatatct thttcttht thagcctaath thttthtga  
168721 thtcttacc gattaaagct ggagaatcca ctcatgaa thcataagac thtaacgctt  
168781 cthtthtagc tgcagcact thcatcagcac tactactat agctcctgcg tgtccattc  
168841 thttacttht tggcgcagtc gctcccga tgaatgctac cacaggttht ctaaththt  
168901 cthtaataaa thtthtctgct tctacttcta agctaccgc gattthcct atcataaaa  
168961 tagctthtgt thtcttatct thttcaat cactthaaag thtthtataa gcaagtccta  
169021 tgataggatc gccaccaat cctactgctg ttgaaatthc ataccgcct tgaactactt  
169081 gattagctgc thcataagtht aaagthccac thttthgaaat aagccctacg caacccttht  
169141 tgaaaataaa gcctggcata atgcctaat tgcattctc agaagtgatg atthctgggc  
169201 aatthggtc tataaththt atacttht thttthgata ctgctthgca aacatcatat  
169261 cthtaaccgg agtatgtht gtaattaca cagcaagctt aataccgca tccgctgctt  
169321 cgattacact atcaccaca gcaaaagcag gaacaaaaat caaacthaca tcagctcccg  
169381 tagcctaac tgcatccgca actgtatcaa aaacaggctt gccaagatga gthtgaccac  
169441 ccttatgagg agthtactct cctactat thgtaccata agctatgcat tgctctgcat  
169501 gaaaagtht thtthtacct gthaaacct gaactatthc thttgtht thtthtaacca  
169561 atatactcat thttthtctt thcttacta aactthttac thattctgca cthtthttaa  
169621 gattggtgct tgctthgata thttthagat ttgagctatc thaaatcgct thtthttagc  
169681 ctgacttht accatcaaga cgcactacga taggaatath aacctcaaca thttthtagtg  
169741 ctctthaaat accatthgca atthtctatgc aacgaacaat accacaaaa atathgataa  
169801 atathacttht aactthttht tctctthaaa thaatcthaaa agctthtgcg actgthttagc  
169861 cagacgcacc accaccaca tctaagaaat ttgcaggttht tgcaccgcta thattgataa  
169921 tatcattgt tgccatagca agthcctgct cthttaccat acaagcaaca tcaccgtcta  
169981 atthtaccata actthaaacca aatthcagccg ctctcttht agcaggttht thctctgtaa  
170041 tatctctaag thcagcaatc tctggatggc gataaagcgc actgtcatca aactacatt  
170101 ttgcatcaag agcataaaaa tctctthtctg cgtthttht thaaaggttht atthtcaagca  
170161 tattcatatc thttatccatg thaaagcttht thaaagthttht thtcatagaa thaaagthttht

170221 tgctttcatc tttatctagt cccaaaacct ttgctacttc aagaccatgg aacattttta  
170281 agccaatttg tggatcaatg cctacttttg caattttttc agggctttct ttagctactt  
170341 tttctatata cattcctcct tcgcttgagg caatgattgt aatttgctct gccattctgt  
170401 taaataaaat agctaaataa tattctttta ctatatttgc accactttct atgtaaagtt  
170461 tttgcaccaa tttaccctca ggtcctgttt gatgagtaac caaattcata cctaaaatth  
170521 gacttgcata ggcctttacc tcatctaaat ttttagcgat tttaacacca ccgccaagac  
170581 cacgaccacc tgcatggatc tgagccttaa cagcccaaac actaccgctt aactccttag  
170641 cattttctac agcttcttct acgctaaatg caacctttcc ctttaaagta gggataccat  
170701 tgtctgcaa aatcgctttt gcttgatatt catgtatatt catttatctt cttttatata  
170761 ttgatatttt attaatgatt tttttacctt gtctttttct tcgtcgctaa gctcaagctt  
170821 cataatctca acaacacct ctaaaccctaa tcttgccata gttcctaagg ctttattttg  
170881 cactccaaat tccccatgca aatcacact cataggcaaa aattctccac ttcttatgga  
170941 ttcgagcatt cttacacaag cgcttgagg tgccaaatat gctgaagtct taagatgttt  
171001 aatcaccttt gcaccaccgg ttttaacttc attttccaaa tcttcaaatt cctcttcgct  
171061 taaaagctct ccgagttttt gatttttaac acttgcataa gattttacta aaaccatata  
171121 atcattatga aaaccaatta atcttgatc cacgcttgaa attttgctt ttaacttttt  
171181 agctacctca tacttaaatc ttgcattgtc taaaaccct gccatagcaa caattttttt  
171241 agaagaaaaa attccgctct cgtaaagagt attgagcaaa aagtccacag gatttgtcaa  
171301 aatgataaaa agtggatcag aattaaattc tttattttt ttagcacaat caagcataat  
171361 gtttgattg agttgcaaaa gctcttctct gctttgacca tcttttcttg caaatcctgc  
171421 actaaaaagc acaatatcag aattttttgt acaagaataa tccttggtgc aaattaattc  
171481 tatatccaaa tttaaagcag ctatgctttg ggataattct aattcctttg caatcaataa  
171541 atcttcattg atatcaacta aaacaatctc attcgccaac tcacgcaaaa ttaaagcata  
171601 ggctacactt gaacctacat tccctgcacc gatgattgtg attttcatct ttgtcctatt  
171661 ttttctatga tagcattaaa agttgcactt ggacgcataa ttttatttgc tttttcatca  
171721 tcaaatttat aataaccgcc taaatcaacc ttcacgcctt gagcgtcatt aaattcagct  
171781 ctaatttttt cttcattaga ggaaaattct aaagcaatat ctttaaaaaa gctttgaagc  
171841 tccatatcat ttgcttgtct tgctaaatga tttgcaaaat acattgctaa ataaaaatgg  
171901 cttgtacgat tatcatcttc ttttactttt cttgatggag ctttattatt ttcaagccat  
171961 tctcctatag cttcatcaag acattctgct aagactttag ctttatgatt attgcattta  
172021 ttagcataaa attctaagct tgctttagg gctaaaaatt cacccaagct atcccaacgc  
172081 aatgggtttt cttctactaa ttgttctact tgctttggtg ctgaacccc tgctccggtt  
172141 tcaaacatag ctccaccatt taacattggt acaactgaaa gcatttttgc acttgttcca  
172201 agctctaaga taggaaaaag atcggttaa taatctctta aacatttcc cgtaatagaa  
172261 atggcatctt ttccagcgcg aatcaattct aagcttttta agcaagcttc ataaggagca  
172321 aggatagcta tatttttatt tttttcctta agacggtttt gaactaaatc tatcataatt  
172381 ttattgctag ctcttttgct atctaaccba aaaatcgctt cagctcctgt taaatcagct  
172441 ctttctatgc ccaagtcaat ccaattttaa acagcatcaa atttagcttg attagctcta  
172501 taaatgtcac cttttctaac tttatgctct aataaaacct tacccttagc aatgatttta  
172561 aacactccat cttcttttagc acaaaaagt ttatcatgtg agccgtattc ttgagctttt  
172621 ttagccatca agcctacatt agatagccta cctaattttg caggatttaa agtgccattt  
172681 ttatgcaaat cttcaataac tgcttcatag atagtcgcat aagtttgatc agggataact  
172741 gcatttgtat ctttttcttt gccttcttta tcccataatc ttgccccatt tttaaagcata  
172801 gcaggcatag aagcatcaac aataacatcg cttggaacat gcaaattagt aatgccctta  
172861 tctgaattta ccatagaaat atcagcacga ctatttataa tttcattata tctttttaa  
172921 atctcatctt ttttacttga agtttctacc ttgcttaaaa gctcgttaa tccattgttt  
172981 ggattaattc caagtgtttc aaattcatct ttaaattcat caaataattc tttaaaaaag  
173041 atttttaccg cataaccaa aagtatagga tcgcttacct tcatcattgt agctttttaa  
173101 tgaagagaaa aaagcaaatc attatccttg cttgctttga tttcttgagc ataaaaatct  
173161 tgcaattttt ctacatccat aaaggttgca tctaaaatth catttttttc aagctttaag  
173221 ctttctttta aaatttcaat tttgcccata tctgcgacaa attcaatact tgctacacaa  
173281 tcctcatcga ttaaaaccgc tttttcattt gaaaagaaat caccttcttt catataagat  
173341 acacgagttt tagaattagg attaaactca accacgcgat aaggattatt cttgcataa  
173401 tctttaaccg ctttagtaga acggcgatct gaattgcctt gtctaagcac aggattaacc

173461 gctgaaccta aaaccttttg atattttggt tttatttgaa attcttcatc gttttttggt  
173521 tcgtctgggt agtttggtaa catataacc ttttcctgca attctttaat cgcagctttc  
173581 agctgtggaa tagaagctga aatatttgga gtcttaatta aatttgcac tgattttttt  
173641 acgagctcac ccaaaagctc caaagcatct tcgcatcttt gatcttcttt tagatactca  
173701 ctaaaagtag ctaaaattct tccagataac gaaatatcag aagtttttac tcctatatgc  
173761 gccttgctta aaaaagcttt tactataggt aaaaacgaat aggtcgcaag cgctggagac  
173821 tcgtctgtca aagtgttaagt aacttgcatt ttctgtcctt ttaaactata attttatttt  
173881 tcaatctaaa gtatattaca attaaaaaaa aatgcaagag taaattttaa gtttgtttta  
173941 gtttttaaac aaacttttaa tacttttaat taaatagatt agaaggaagt tgmtatgat  
174001 ttttaataca gttaaaagga gtttttaaag taccacttaa aatttgggta tgaattttg  
174061 gattatccaa agcgccatcg acttttatat tagtacttat ttcttgattt ttccctaaaa  
174121 taacataatt taaaatcgga acctttgaaa tagtttcaga agctgatttt aaagttttta  
174181 attccaaatc tacatcaacg gtatttaatc ttaagtttgc gctacctaaa ccatacaaat  
174241 ccatactatc tccattttaa ttaatcgctt caaaactaag taaatctttc ttacgattaa  
174301 aaacaaccct tccatcatgc aaacttaaac ctttttcatt aaaagtagga gttttaaaca  
174361 tcaaaagact tggaaccgta tcgataaaaag atataagctg attaacccct ttaaggtccc  
174421 ttataaaagt atcttttaaa ttaaattccc cctcaaaata atctgtgctg ctgcctacca  
174481 cactaaaatt aaaaacacc tcctgcacgg ctgccttttg taaaaattca ttaagatgct  
174541 catcgtttat attgttgaca aataatttca aatcattagg actataatga agatcaaaat  
174601 ttgcattctt gcgagtagcc ctagcatcta agatatcgct ctttaaattt gcctctagtt  
174661 tatcaaattt taaagtttta ttaaactctg ctaaaatcaa agcaagattt tctccattga  
174721 gtataatatt ttgagtattc tttgctatat caaacgaaga agcggagca tttttatctt  
174781 tttgataagt ataagtcaaa tttttaagat gtatggtttt attattatca ataactttgg  
174841 cactgaccaa accactttgt gtatttatgt ctaaaacacc atttttacgg acaataccaa  
174901 agctatcatt ttcataaggt ttattatcga ctaacaagtt gtttttaaaa tgagcatcct  
174961 gtatttgtgc attaaagtca ttaaaatcta tacttttata ataaatactt tttgactca  
175021 taaaaccgaa attttttaat aaaggcgaat gaggtattaa aacactagaa ttattggcat  
175081 atacttcaag tccttcttta aaatttaaag tcaaatccca ttctggcata ctaagctgca  
175141 aatcatcttt atagtctaaa tttatcactg ttttttgatt tctcatatca aaaagctcac  
175201 cattgtcaaa atacaatctt gaaatttgag tatcaaaaat acccttgtgg ttggctagat  
175261 cgatttttagc attaaaattt gcttccaaa actcattttt tacacttgca ttttctatgc  
175321 tcaagtcatt ttgattcagt ttaacaaaag ctttagccac attaaaattt gccaatgtaa  
175381 gctccgcatt ttctaaagac aaagtgccat tgtattttta atcacctttt tcattaaaat  
175441 cgattataag ctctaaatca cttccaagct ttccactttt ttgataaaaa ggtaaattta  
175501 aattataatt ttttaatgcc ttggcaagct tttcatcaaa ttttaaat ttagatttga  
175561 tacgcaata aattccatgt tttttattgt caaataaatc atataaaaac acctactttt  
175621 cacttaagtc tgattcatta taacttgcct tattgaaagt aaaatttaat ttttgattgc  
175681 ttaaatttaa atcaagtttt ggaaaattaa tagcattcat ttgattgtct aaacgaactt  
175741 ttacattatt tgcataacc catgcactga tatcatcaaa ataataatta ttttagata  
175801 aatcaacaaa accttgaata aagtcaaaat gatagaagtc cccttagct ctatgtgcaa  
175861 ccaaagaac taaagttca ggaagtgtta ttctttttc tgcttgattg aaaatagtag  
175921 taatatctct aatgttaata tcttcaagct tataagctaa gttttgattt ttataagaaa  
175981 tatttacttt aaaatcaatt aaatcgccac ttgcttggcc tttaaaatta taaaattcac  
176041 ttcttgcatt aatactttaa tttccatcta cacttaaatt ataactttta agccaaagat  
176101 ttttgatgtc agcattgatt tcttggccct ctctgtgtaa ggcaagtttt aaaacaata  
176161 aatcattatc tacaataaat tcatcatttt taacaatat acgcatatga ttatctttaa  
176221 tattgagatt ttgtatgtct atttctcaa caaaagtata aagatatttt aaattcttag  
176281 taatctttaa caactcctta gaagcaaaat cagaattttc attcttatca tcttgaatgc  
176341 ttgcattagt atcttcatca aatgtaatat ttttgctcg cacaatgagt tttttatcta  
176401 atttaataa taattgctcc aaatttaaaa aacttaattg gatattagat atgagaatac  
176461 cattcttaag aactaaaaat atagccgaga taaatacaat taaaacaagt aatacatata  
176521 caattttctt tttcattaga aacttctttt tgatatttat ttttaggaatt ttttattatt  
176581 taacacaacc tttaaaaagc aattctgttg ttttttgcc tcaaggttct attgctcaaa  
176641 ttataacaca tctaaagcaa aataaatac aatgaactc gattgataaa tatatcttgt

176701 ttttcttagg ccacacctca tcaggttgga taaatatagg cacaaaagaa ctcaatagga  
176761 tagaattttt acacaaactc actatagcca aagcagcatt agaaactctt actctaattc  
176821 ctggagaaac cagtgttaatt tttttagaac aagctgcaca acaattagaa cttgataaaa  
176881 acacgctttt agctgaattt gaaaaacaag ccacatataa agaaggagtt tttcttcctg  
176941 aaacctacaa aattccaaaa ggaatcacag aagcactttt aattcaagtt ttactcaaac  
177001 atgcagaaaa tacaatataga aaaacttcgg aaaaaatttt tggcgaatac aatgctaaaa  
177061 aatggcacca atatatcata acagcgtcag tcattcaaaa agaagcggcc aatgaaagcg  
177121 aaatgcctat agttgcaagc gttatttata atcgtatcaa aaaaggtatg aaacttcaaa  
177181 tggatgggac tttaaactat ggaatttatt ctcatgcaa aatcactcct caaagaataa  
177241 gacaagataa tagttcctat aatacttata aatttgaagg tttgcctaaa gaagcggttt  
177301 gcaatgtttc tctatctgca attcgtgctg ctatctttc tgcaaaaact gattatttat  
177361 attttgtaag agataaagcc acaggagcgc atatttttg caccaatctt aacgatcaca  
177421 acaaggctat taatttgcaa aaaacaaata attgaaattg taaaaattta tgcaagttgg  
177481 aacagtattt gcttgtaaat ttttgaaatt ataaaaagga taaaaaatga ttaacccttt  
177541 caaatcaaaa gaacttatca caagtgcctt agcgggtaga aatttaagaa atcaactcat  
177601 caatgcaaac cttgcaaatg ttgacactcc tttttataaa gcaagagata ttgaatttga  
177661 aactgctttg gtaaactcgtg caaatgaaat ctttaaaaaa aatgacaata aagaattgca  
177721 attagcaata accgaagaag gacatcaaaa accttggaag tttccagatc ctagcaaatc  
177781 tactatttat ctaagagatg gacatttagc aagaaatgat gctaactctg tagatttaga  
177841 tgttgagact actgagatga gtaaaaatac agtgatgatt acagctcttg atggggctctt  
177901 aagaagacaa agtaatatth tttagctctat acttgatgca agttctaaat taagttaaag  
177961 gtaaattatg gcatacttaa gtgattttga tattagcgga tatggtttaa gtgctcaacg  
178021 ctttagaatg aatgttatta gctccaatat agctaagca aatacaacaa gaacagctga  
178081 aggcggacct tatagaagac gcgaagtgat ctttaaagca acagattttg acaagctttt  
178141 aaatgagcaa atcaataaag acaataactt tttaaaatat gaaaatcctt taaatgatcc  
178201 aagctcgcct gaagaggcaa agcctgctat acaaagtgtt gttgtagata aagtcgtaag  
178261 agatgataaa gattttcgtg tgaatacga tccctctcat cctgatgcta atgacgcaag  
178321 ctatgtagca tatccaaatg taaatcctgt catcgaaatg gcagatttaa ttgaagcaac  
178381 aagagcttat caagctaag tttagtgctt tacaagtgca aagaccatag ctcaaagcgc  
178441 gattgattta ttaagaggat aataaaatat gaataatatt aatgatttaa gattaataa  
178501 caacatttca aatacaaaac aaagccaaaa ctctagtgat agaatcggtg atgaatttgc  
178561 caaatgctt aaaaatgaaa ttgaagattt agataaaaact caaaaaactg cagaagctgc  
178621 gatgacggat attgcaacag gacaagtaaa agatttacac caagcagcta ttgctattac  
178681 aaaagctgaa agcagtatga aatttatgct agaagtccga aataaagcta tcagtgctta  
178741 taaagaaatc acaagaacac aaatttaact tatatgcaag agcataagaa aaatcgcggt  
178801 tcaaaagctg ctttgctta ctgcatggca cttttttta tgattatttt tcttagctct  
178861 acctttttt tcacttcaaa acgcatatc cctaataccg aaaaagatca atactctatt  
178921 gccttgccg gaaacatcat cactaaagat aattttacta tcacaagctc gagacaaatt  
178981 tatcgcgcag aaattgattt aagaagtatc aataaagata aatttgattt atttttaaaa  
179041 cttttcaaa tatatagcgg tattagcgat agtgaaattg cagatattaa aaaaagaatc  
179101 caaaaacaaa aaaaacgatc ctatcatttt atcctttctc aaaatttaga ttctaaacaa  
179161 gcaagttatc ttaaagatct tgcaaaaaag ctttatatac aaggattttt taaagcattt  
179221 accaataact taggaaaagc cgaacaagg ggcttgagta tcatagaaca cgaagaagat  
179281 agaatttata tgcctaaaga tgccttaact ccagccatag gttatacaaa aatggtttta  
179341 gatcctcaaa gtggaatttt aaaaaatggt ggagtaaaag ggcttgaaaa atactacgat  
179401 gcttgcttaa atccgctcca aaacgagaaa atccaagggt taaaagatat aggtggaat  
179461 ataactttaa atttaaattc attacagcaa aaaaagattg atggttgtct tttatatctt  
179521 aatataatcct taaaacttca aaaaagcatt gaaaaagcga ttgatggaag aatgaagat  
179581 ttaaaagcta atgaaatcat agtcggagtc atggatagta aacaggtca aattttagct  
179641 cttgcaagct ctagacgtta tgatccgcaa aatcgcggca aagatttatc tgttttaaat  
179701 gcaagcgcca tagagtatgg atacgaagca ggatcggtta tcaagccttt tatttttaca  
179761 actgctctaa gacttggcaa actcaagacg gatgaagtga ttaataccta tggcggagcc  
179821 tataaactgg gtcgttttac cattagagat gatcataaaa tggatcaaat gactatggaa  
179881 gaggttaatta ggtattcttc taatataggg atgatacaaa ttgcaaaaag attgagcaat

179941 cttgaaatca ttgctgggct taaaatTTTT aaatttggtg aaaagagtgg gattgatttg  
180001 ccttacgaac aaaaaggaga aattcctaata tccaagcgtt taagagatat agaaaagtcg  
180061 gtattaagtt atggatatgg tttaaaaaca acctttatac aacttcttgc tgcctataat  
180121 gtttttaata acaatgggggt ttatataact ccacatttgg ctgaaaaatt ctatcaagat  
180181 ggacgctttg taagtcttga agaggatatc aaaaaagaag ttatcttaac cccgcaagca  
180241 gcacaaacca tgcaaaaaat tcttattgat gttatagaaa aaggtagagg aaaaaagcc  
180301 atcactcaag gcataatcat aggaggcaaa acaggaaccg cgcgtattgc agaaaggcaa  
180361 ggctatactt ctaatcgcta caatgcttct tttttcgggt ttgctaataga tgcaaacat  
180421 aattatacca taggagtttt agtaagaaat cctactaac cttatagtta ttatgctgcg  
180481 caaagtgcct tgcctatggt taaagatggt gtagatattt taatcaatga ggatttttta  
180541 acccctgtca ttgtagaaaa taaccaaact cttaatatt atcatcccaa agcacctttt  
180601 ctcttgcaaa aatgatttca acagcatcta tgagatcttt agcgatctta gcgataaac  
180661 ttgtatcatt gattatggat atgccctctg cggtagtgat ttttctaacc aaaataagat  
180721 gttcgacatt attaagagtt aaaccatcaa tttcttttaa aatttcctta ctttttgaa  
180781 gatttttaat aattaaatac attttttcat catcaacagc cctaagctct tgaatacttc  
180841 ttaataattc tcctaaatta gatcttattt tattgtattc taaggccaaa tctttattgt  
180901 tgcaattaga gtatTTTTTg atatTTTctt gaactaattt taaatTTTta gttgcctctg  
180961 taagatTTTT agcagcgatt ttaaaagtaa aaattctatg atTTTtaagc tcatcatcta  
181021 tatgaatttg tgctttgggt gaaaaatcga tgatcgcttc aaaaagcact ttgattctag  
181081 tttgatacaa ataatccaaa tccacatttc tgctgaacca ttttttattt tgtaaaattt  
181141 cttcaaaact tttattgctt tgtatatcct tgcgacttaa acctatagca tgagcgataa  
181201 tcgcatacgc attatcataa agatgctcgc tttcttttcg caaggcttcg atagctgtat  
181261 cgctaaattt caataaatta gaatcaagat ataaaggctc atccttgttt ttatccttag  
181321 acgctttaac gctcttggtt aaaaaattta ccaattgcgg gataaacat acaaaaacaa  
181381 atattcccaa aagattaaac aaggtagtaa ataaagccat tttcaaagct aaatTTTcta  
181441 tattcaaaat tcctgctatc ccatttaaaa aatcaataaa ataaggaaaa atagctatga  
181501 ttataattgc aatagtaaaa ttaaaaatac aatttgcaaa agcaagcttc ttacctcaa  
181561 cattagtgct taaagaagct agcacagctg ttaccacacc tcctacgcta gtgcctaaag  
181621 tcgctgctaa agaattttcg aaactgattt gtcttgccaa taaggctcgc actataatgg  
181681 ctattgtcgc tgtgcttgat tgaataatac ctgtaagcaa agccccaagt cctacaaaaa  
181741 tcagcactcc cttaaaacct gtaaaatcaa aataagacaa atctatagca tcttgaaatt  
181801 cattaaaacc attttttata taatccactc caaaaagaa aaaacctata cctataaaaa  
181861 tattcccaa actttttata atattgtctt tttgaaagaa aaataaaact ccaatcacia  
181921 gcaagggtat agccaagata gaaatattaa cccttgtaag ccaaacaatc agccaagaac  
181981 tcgcagtatt tcctaaattt gcacaaaaaa taatccccac accagcggtc aaagatataa  
182041 gtcctgcaact taaaaagaa agggaaataa ttgaaactaa agtcgaagat tgcataataa  
182101 gcgtactaat agcaccaaaa agtatgcttt taaatttcgt atttgttgag cgagtaagga  
182161 ttctttcaag taaaccgcca ctaaaagatt taaaccctaa acttaaatTT gtcattccta  
182221 taagcaagat tgcaactcca gctaataagt tggcaaatc actaaagcga attaaagcaa  
182281 agatcaaaat caaggtaaaa ataccgcaaa aacttatctt gagatatttt aaaaagtttt  
182341 tgtcttcttg caccctatcc tctaagcttt tcaaattcac tcattaaatt ttctcttaaa  
182401 ttttcagcct cttcttcgcc attttccaaa tactcaagca ataaatTTTc aagctctttt  
182461 aaaaaatcaa aaagctcatt ttgccatata ctatcacttt tattacttaa attcattggt  
182521 tgtataaagg taagctctct gcttaaatcc cctaattttt ccaataattc atcttttcta  
182581 tcttgatctt ttaaggcaga actattattt tgaattctat ctttaaattc tctaattctt  
182641 tcatcaataa tatcaciaaaa tttaggataa atatctgatt ttataggctc aagcagtgct  
182701 ttttcatcta tatttaaaagt aagtttttta agtgcaaaat aaaggagtaa aaaagataat  
182761 gctgctatta acaataaag tcctatcata tccaaccttt taatgccaac atcccacat  
182821 ctaaatttac actttctaaa ccaagttcat ttttaataaa attggcagcc atcactctc  
182881 tatgacctcc acgacaaata aaagcaagtt ttttattttt atcccttctt gtttgaaatt  
182941 cttctaaaaa attagcattt aaaagtccgt gattatcata taaagctaca cattcagcat  
183001 ggggtaaaac accctcttc cattcagctg gaggcgaac atcaaaaatt tgatattcgc  
183061 ttaaactctg cttcatccaa acacttgctg ggagatttgt aatcatgaga aagccttagt  
183121 aatgattttt gtaagacttg cattaaattc agccggatta tccacgcca taccttcgct

183181 aagttttgcc atgttttaaaa ccaaagttgc tatatcggca ctaaaagttt cattatTTTT  
183241 aaggcctgta aaaattgcgt gctttggatt gatttccaaa ataggtttta agttttgctc  
183301 ttgccccatt tgtttttaaaa gttgctgcat tgcaaaatca ggtttatTTTt tatcataaac  
183361 aatacaactt ggactatcct ttaaacgact tgcagtcctc acatcctcaa cttgatcTTTt  
183421 taaaagctct ttaaatttag ccactaatga agcaaattca ttttttctt catcacttaa  
183481 ttcattttta tcttcaactt gattaatagc taaaaattc aagccctcat attctccaag  
183541 cataggagta accaaagaat cgatctcatc atccatgagt aatacttcta ttttttttg  
183601 cttatattct tcaagcaaag gtgaatttct aagcaagctt tcattgcttc caatgatata  
183661 aaaaatttct ttttgttcgc cttgtatata gtttttgat tcttctaaag agcgtaagct  
183721 ttcgcctttg gtgcttttat aaagcatgag ttttaaaaga ctgtcTTTTt cgccaccaa  
183781 accataaagt ctttctttta atacctgccc aaaattctta aaaaagctta aatatttttc  
183841 tttatcttta tttttaagtt tttcaagctc gctaagtatt tttttaacac tggcttctt  
183901 tacacctttt aaaatttgat tttcttgtaa aatttcacgg cttacattaa gtggtaaattc  
183961 ctccacatcg ataattccgc gtacaaaacg caaataagtc ggtaaaagct ctttatcgtc  
184021 atcactgata aatacacgct ttacataaag ttttaaacg ctttgataat ccacacgata  
184081 aagatcaaaa ggtgcatttt gcgggataaa aaataaagaa ttgtattcta attttcttc  
184141 gcttttggtg tgaagataaa gcaagggtt attagaatcg tgaaaattt gctcataaaa  
184201 tctttcataa tcctctgctt taagacttga tttttgcatt ctccatagag cattagctt  
184261 gttaatctga gaaattttta gctcagttt tccttcttc tcgccctct tagcagggat  
184321 aaattcttct ttttcataa aaattggaaa ttgaatatga tttgaatatt tttctataat  
184381 gctttcaatt ttataagaat ttgcaaattc gtcattctt aaatataaag tgatacttgt  
184441 cccttgctct tcttttagtc catcttcaat ctcatagcca tttgcatcag aaatccaaag  
184501 ataggcttta tcatctaaag cttttttgct taaaacttcg attttgctag ctaccataaa  
184561 tgcagaataa aaacctacgc caaattgtcc tataagttga gaatctttt ttgcatcacc  
184621 acttaaattc tctaaaaagc tttttgtacc actttttgct atggttccaa gattgttaat  
184681 aaggctatct ttatccatac ctataaccatt atcactaata gtaagggtt ttttatctt  
184741 accgatttta atatctattc taggttcaaa ttttaactt ttatatttat catcactcac  
184801 gcttaaaaaa ttaagtttat ctaaagcatc acttgaattt gatacaagtt ctcttaaaaa  
184861 tatttccttg tttgagtata aggaatgaat catcaattgt aaaagttgat ttacttcagt  
184921 ttgaaactgc attttttctc ctttataaat tttgaaacag atatttttagc aaaaaatata  
184981 aactctaagg taaatttcaa gagcttactt aaaaattata aaaccaagcc aaactgctat  
185041 gagacaaaga attatattga ataaaatatt taaagaaaaa ttaaaataat ttccacttg  
185101 taaaagcagt aaattttcat aagaaaaagt agaaaaagtc gtaaaagccc ctaaaaatcc  
185161 tgtacttaca aagcttttaa tggcgggaga taaaccctta tgatgcgcat aagaaaataa  
185221 aagccccatc ataaaagatc ctaagatatt aacaaaaaga gtaccaaagc ttatagaatg  
185281 aggtaaaatt ttatttatca aattgataga aagcattctt aaaactgccc ctataaaacc  
185341 cccaaaacca acaactaaaa tagtatttag caaagcttag ctctttcttg atctagcaat  
185401 tcttgcatTTt tttttctagt attttcaagc catttatcat cactcgtatc cactaaatcc  
185461 atgcagatga ttttcaacac tccagaacta gcactaaaac ttttggtatc taaaattttc  
185521 gcagaatcga caattaaaat aggctgcacc tttaagtcaa gcttatcgct taaaacctta  
185581 gcaccacttt gaaatttaag caatttttcg tttctagaac gcgttccctc aggaaaaatt  
185641 gccaaaactc tatcttcacc caatctttgc ttagcttctt ttaaaacacg caccaaattc  
185701 cgtggatttt ttctatctat acaaagaagc ttgggttttt taatggcgat tttaaaaaga  
185761 ggaatttcac ccaattcttt ttttagcaatc cagcataaat ttttaggata caaatcctct  
185821 aaagctataa tgcctaaagt gctttgatga ttcattaaaa tcatatttgc actaagatta  
185881 aattctccta tgacttcata tttgcaaaaa agaataTTTTt tttgaaatct agcccaagat  
185941 tttcgaagtt tccaaagagt atcttgggac tttataaaac aaaagcataa cacaacaaaa  
186001 gctacgctta taataaaaaa taacaaaaaa tataaagctt taattttttt gtaaatcact  
186061 actttcaacc catcctatcc taccatcttg aaaaagcact ttgacataat gaagtctttt  
186121 gcctaacacc tcaacctttt cgttagaatt tgctgtataa aaataagttg atgattcagt  
186181 tggtaaaatt ttagctctag aacctgcttt taaaattgca ttttctgtgt tagtatctac  
186241 aagaaaacca agtataaaac ataaaagcgc tcctgctaaa ataaaataat ttttctcca  
186301 aacaaacctt aatgccaaaa taagagttaa agcccaaaga gcatattggt tataaatatt  
186361 aaaatcccta tttgtaggat ttaaactcgt ttgagtgtt acctcatcat cgctgatttt

186421 aagcttaaag ctcatatntt ccattntntt agtgtctttg ttaaaataag aaaattcaaa  
186481 atctgtntta gtcgatggaa aaatagcata ataaaaagca ttagaagaat taaaatcacc  
186541 ctttaaattt tcaataccct gtttctcgac tccatttaca aaaaaactct taagatttgt  
186601 attttagca cttattcaaa tcattgtaat aatatttgaa tcatcaaaat aactggntt  
186661 aatntntnta acttccaaag aacttgccac aagatgtgaa aagntnttat tattggcggt  
186721 atnttcaaac tggatagcac ctataactaat actagcactt tgaaaaactt ttccatttct  
186781 taaaagactg actgaaatct gctccaaatt tgcatttgaa gntnttagcct caaacacaaa  
186841 aacagcccta taatcgcctt taatgtactc ccattnttaa tcaggattta aaaaaaccaa  
186901 gtccttgctt tnttgcaaag tgatattaa atcaaaattt gtatcttctg tagntntggc  
186961 atgaaggatt atgggaaacg cctctccaac atatactttg ttgacataat catcagtagt  
187021 aagaactaaa gagctntggg gtataaaagg atcatatata ttactatcaa aatcgggaatt  
187081 ttcatcactt ggagcgatat tntgataaat ttgctgctc tctnttgtaa gntntttag  
187141 ttctnttgc atatnttcat cttgaccatc aaaaacagaa atntcactt gagcaaaaag  
187201 actaaaacaa acaaaaacta gaaaaagtat tattctcaca taaagcctt aagcattctt  
187261 aagcctatat cattacctaa aatnttatcg caagcacgct ctggatgagg cataagacca  
187321 aaaatntntt tntnttcatc acaaattcct gcgatatac acacagagcc attaggattt  
187381 ggttcatatt ttaaaaggat taaatcctta tcttgcaatt tnttcaaagt ggcttcatct  
187441 gcataataat ttcttccacc atgggcaata ggaagattga tgatttcatc tntcttaaaa  
187501 tntnttaaga aaacattatt attcgaaaca actcttaaat tntgattntt tgaataaaa  
187561 cttaaattat tattatgctt catggcacct tctaaaagtc cgnttcaag caaatnttga  
187621 aaaccattgc aaattcctaa aatatacca cctctnttgc catgtgcaat aagccttgc  
187681 atagcaggag caatnttagc aattgctgca catcttaaat aatctccata agaaaatcct  
187741 ccaggtaaaa ccactaagtc tgcattaatt tctnttctt cgtgccaaac gacttgcgct  
187801 tttacgccga tntnttcaaa agcatattgg gtatcgaatt cacagnttgt tccaggaaat  
187861 ctaataatag caacttcat catttctcac ttacaataag ctcataatct tcgattacac  
187921 tntttacca aagctcttca cacatgctt ttacgcgctc tnttgcntt tgntcattac  
187981 tctcatctaa atcaagtata atntgnttag ctactcttgc tntnttact tcgntaaaat  
188041 ttaaagaatg taaagcctt tctatagctt tntcttgggg atctaaaaca ccgntnttca  
188101 aaaaaacatt aacaactatt ttcatatat tnttagntt aaaaatcctt ttaaaacctc  
188161 ttcataggcc atnttaacat ttcttaaatc ttgacgaaat ctgtctntt ctagctntt  
188221 attgctaaat ttatcccaa atctacagct atcaggactg atntcatctg ctaaaacgag  
188281 ctcgnttatct ttagntaaac ccaactcaat tntaaaatca ataagtctta aatntntagc  
188341 atcaaaaaaa ggacttaaga tgcattaat cntnttagcc atntctntaa tntctntaat  
188401 ctgtgcctca tnttgtaacta aatntaaaat caaacaatgc tcatcattaa taaaaggatc  
188461 tcctagctca tcatntntaa gacaaaattc caccaaaaca aaaggtaaaa ccgtgccatc  
188521 tntaatacc aatctntntg taagcgatcc tgttgcaaca ttgcgtacta taacctcaat  
188581 aggtataatt ttacatntt ttatcacttg ctcatgtcg ttaatggntt caaccaaatg  
188641 ggtntntatg ccattntntt caagtaaag aaaaagctcg gtgctgattt tgcaatntaa  
188701 tgcgccctt ccgctntcac tntctctntt tntggcatta aaagctgnta aatcatctt  
188761 aaattcactt ataagaaat tntcatctc ggtagcatag agntntntac ccttgcctt  
188821 ataaagtaat tctntntnt tcataattat tntccttnt taatattnta gntnttgata  
188881 gtatctatgg cagntntaa ctgcgcatca tcatntatnt gntnttgagt aataatattc  
188941 ttatcattnt tntgntctt cttgtcttct tntntctcat tnttatcaag tntntctagc  
189001 tcaactctta aatgctgctt taaatcgct tctntgatat tgaaactatc tntcttagta  
189061 ttgactntt ctggaacac ttcaatatcg ggtnttacac ccactgctt aatagtgcgt  
189121 ccacttggca aataatatct tgcaatagta agtctntaaag cttcagntt atntatcgga  
189181 ataatntgct gaacactgcc tnttccaaa gtatnttctc ctacaattat agctcgctta  
189241 agatcttga aagccccgct aacaatctca cttagcactc cacttctc atntacaagc  
189301 accactaaag aactatcaga aatntatnt tntggattg cttntactc tntgntntca  
189361 cttgtaacgc gtcctntntg agaaacaatc actcctntt ctacgaacaa atntacaagt  
189421 ccagtggctt gntntaaaag gccgccagga tntntctta aatccaaaat tacacctnt  
189481 acatcaggat gntntntaag ctctntgct gtcatatcta caacatntt atcaaaatt  
189541 gtaactctta aataaagtat atntcattt tcaataagct ttgcataaac actntctact  
189601 ttgataatat cacgcgntaa agcaacatca aaaggcttag ttgctcctt tctaaatata



189661 gtaagagtga tttgtgtcctt tggttttcca cgcattttat ccactgcatc atttaagttt  
189721 attcccaaag tagcttcac c attgattttt aatataatat cacctgattt aatccctgct  
189781 ttatccgctg gagttccttc tataggagag ataacagtca aggcgccatc tttcatacct  
189841 acagtgatcc caagcccacc aaattcacca cttgtttgaa ttttcatatc gttaaaatct  
189901 ttttcattta aaaaagagga atgtgcatca agattactca gaagcccaga aagtgactta  
189961 tcaatcaa at ctgta atatt ttc atcatct acataact gctcaactat agctaaagtt  
190021 ttagtcagtt tatccaaaga ctctaagcgt t gttgcatta aatcagattg attccttggg  
190081 tttgcttgta ggttgcttgc taaaaaaaca caaagagcca aagagcctgt aaagcctgta  
190141 atagcggcta gaaatctttt actactcaa atgaactcca aaattaaata ttttaagccc  
190201 aaatttta at aacttttgct taaaaattcg taaataatac taaatttggt ataagttta  
190261 tggatttaaa aaaattaatg ctaaaatatt ttatattttt taatttttaa gcaagaaaga  
190321 atataaatg aaacacactc atacacattc tccaaaacat atcaaagcta taagtaatcg  
190381 cctaagtcgt accataggac atttagaagc tattaaaaaa atggttgaaa gagatgagga  
190441 ttgtagtgat attccttatcc aacttgctgc ggtcaaagca gcggttaaca ataccgcaa  
190501 agccatactt aaagaacatt tagcccattg tatgtatcat gcagtgatgg aaaaagatac  
190561 acaaagtata gaagatttaa acaaagctat tgatatgttt gtcaagtagc ctttttttaa  
190621 tactctgaat ttaatacttt caaataaata ctttaatttt ttgcaaaaat attataaaat  
190681 aacttgacat tatttgacta aagttatata atgctatata tataaaactt gaaaaaggat  
190741 atacaatggc aaatatacaa gaatttttaa cgcacaatat gctttcaaat cttgaaagcg  
190801 cggcatcttt agcaattcat tctaaaaata atgaagttgt ccctttgcat cttttatggg  
190861 cttaattgt agacagttca agtattttta atcaaatttg taataaattt aatatttcaa  
190921 aagaagcttt agagcttgaa atcaaaagca aaatttcaa tcttgcaaca agctctaag  
190981 taaatcgtga aaatatgcgt ttttcta atg aatttatcaa tcttttagaa agtgctaaag  
191041 gactcatgag tgccaatggg gataactatt taagtgtaga tacttgctt ataagtgaaa  
191101 gtgaaaaaaaa ccctattaga gaaattttag ctaaatttat agatattaaa gaatttcaa  
191161 aagaactcca aaatctaaga gcgggacgca aaatcgaaag caaaaacaagt gatgaaacct  
191221 tagatagctt aaataaattt ggtatagatt taaccgcaa agcaagtga ggaaagcttg  
191281 atcctgttat aggcagagaa gaagaaatcg aacgcttgat gcaaattctt atacgcaaaa  
191341 cgaaaaacaa tcctatactt ttaggtgaac caggagtagg gaaaacagca atcgtagaag  
191401 ctttagcaca aagaattatc aaaaaagatg taccaaaatc tttacaaaat aaaaaagtca  
191461 tagcacttga tatgagtga ttgatcgcag gggcaaaaata tcgtggagaa tttgaagata  
191521 gattaaaagc ggtggtaaat gaggttatta aaagtgaaa tatcatactt tttatcgatg  
191581 aaattcacac catagtaggc gcaggagcaa gcgaaggaag tatggatgcg gcaaatattt  
191641 taaagccagc acttgcaaga ggcaactac acaccatagg agcaaccact cttaaagaat  
191701 atcgcaaaa cttgaaaaa gatgcagcct tgcaacgccg ttttcaacc gtaaatgtag  
191761 gcgaacctag tgtaaatgaa gctttagcaa tgctaagagg tattaagaa aaacttgaaa  
191821 ttcatacaaa tgtcaccata aatgatagcg ctttagtagc ggcagctaag ctttcaaac  
191881 gctatatagc cgatcgtttt ttaccgata aagcaattga tttaatcgat gaagctgagg  
191941 ctgaacttaa aatgcaaatt gaaagcgaac caagctcttt aagaaaagtg cgcaaagaca  
192001 tagaaacctt agaagtagaa aatgaagctt taaaaatgga aatgatgaa aaaaatcaa  
192061 aaagactaga tgaaatttcc aaggagctag caaatttaa agaaaaacaa agtgccttaa  
192121 actctcaatt tgaaaatgaa aaagcagtct ttgatagcat aagtgcaaag aaaaaagaaa  
192181 ttgatagtct aaaaaatgaa gccgtttttg caaaaaata aggtgaattc caaaggctg  
192241 cagaattaga atatggcaaa attccagaat gcgaaaaaga agtggcaaat ttggaagaaa  
192301 aatggaaaaa aatgagtga aatggagtct tacttaaaaa tcaagttgat gaagatttgg  
192361 ttgctggaat ttttaagtaa tggacaggaa ttagcgtgca aaaaatgctg acttcagaaa  
192421 aacaaaaatt tttagaagta gaaaaacacc taaaagaaag cgtaattgga caagataaag  
192481 ctctaagtgc tttagcaagg gctatataac gcaataaagc aggattaaat gcagacaaca  
192541 agcctatagg aagcttttta tttttaggac ctacaggagt aggaaaaaca caatctgcta  
192601 aggccttggc gaaattttta tttgatgatg aaaaagcaat gattcgcttt gatatgagtg  
192661 aatttatgga aaaacatagt gtttcaagc tcttaggagc acctcctggc tatataggac  
192721 atgaagaggg tggcgagctt actgaagcgg tgcgtagaaa gccttatagc gtgcttttat  
192781 ttgatgaagt cgaaaaagct cataaagatg tatttaatgt gcttttagga attttagatg  
192841 atggtagagc aaccgatagc aaaggtgtaa ccgtggattt taaaaatacc attatcattt

192901 taacttccaa tatgcctca agtgctatca tgaatttaag tggaaaagaa caagaagatg  
192961 cggtaaaaaa tgagttaaaa aatttcttca agcctgaatt tttaaatcgc ttagacgata  
193021 tcatcacctt taatccacta ggaaaagatg aggcatatga gatagttaag cttttattta  
193081 aagacttgca aaaaagtttg gaaaataaag gcataaaaagc aagtcttagc gaaaatgctg  
193141 cacttttaat cgctaaggac ggatttgatc ctgactttgg tgctagacct ttaagaaggg  
193201 ctatttatga tttaatcgaa gacaaactaa gcgatatgat acttgcagat aagcttgatg  
193261 aaaacgatga gatcatcatc gatgcaaaaa atgatgagat tgttatcgaa aaagtttgac  
193321 tctttttaga agaaatagac ttttctatct cttcgcatac tttttaaaat aaaatctcac  
193381 tttcgttaaa tttcatatct gctcttggtg gaggcgattt gatagtataa taagcatttt  
193441 tccccctgta gcttctctta tatacccatc ttggaatact gaattttctt gtagtatcag  
193501 gaaatttatc taagtattta tttaaaaatt ctctaaatac aggagcagag gtcctagccc  
193561 caccctctgt ataacgcata ggcttattat tgtcatttcc ataccaaatc aaagcttcaa  
193621 tctcaggcgt taagccacaa aaccaagcat cgatattttt gtttgtgggt cccgtttttc  
193681 ctgctatttc tataccttca acccttgcac tgcgccctgt gccatgctct acaacatttc  
193741 tcatcatatc taaaaccaa aagctttgtg cttcatcgtc cactctgtat tcatctgagt  
193801 taaattccat aataatttga tcatttctat cttgcacttg cctaataatt tgtggctctt  
193861 ttataactcc gtaatttcca aacatagtat aaaattttaga atactccaaa ggagaaattc  
193921 caaaacttcc taaaacaatc gataaattag ccggaatata tctaaagcca aattctacaa  
193981 gttttgaatg aagtacatcc agtcccatat tgagtgcgag attgatagta gctagatttc  
194041 ttgagcgtgt taaggcttct tttagggtaa tcaagccaag gaatttacct ccatcgtttt  
194101 tgggtttcca gtctttatta tcccctgctc caccttcaaa aattctagaa atatccgcaa  
194161 tctcactcac aggcgaataa ccaagattaa tagctgcttg atatacaaaa ggcttaaagg  
194221 agtaccggg ttgtcgcgtg ctttgagtgg ctcggttgta attgcttttt tcataatcaa  
194281 cccctctac caaagctaaa acatctccgc tttgatgatt aacaaccacc atagctccat  
194341 tttagcgtgct taagtttgca tctttatcgc gttttactat tcatcataa ccaaatttta  
194401 aggcgttttg agccatttct tgtacatcta aatctatatt taaagtgatt ttatagccac  
194461 ctgttttaag atctttaatg ctaggactta attgcttaat cacctcatct acgacataag  
194521 gagctgcatt ttgcgttaaa gtatcatcat aaatttgagg aatttctttc atagcctcat  
194581 cgtattctgc tttagaaatc caacctaag tatacattct tgctacaaca ttatttgctc  
194641 ttgcatagaa aagatctaaa tgttttgtag gatcataact acttggtgct tttggcatac  
194701 ccacaagcat agcaatctct ttaagactta actcgtttag attcttatga aaatatcctt  
194761 gcgcagctgt tttaaccca taataccat gcccaaaaaa gatataattt aaatatcttt  
194821 ccaaaatttg ctctttgctt aaaatcgttt ccattttgta ggcgagcaag gcttcacgaa  
194881 ttttacgagt gatggttctt tcaggagtta attctgtggt tttgataaat tgctgggtaa  
194941 gcgttgaagc cccctccatg gtttttccac cactttttat gattttaaca acagctctaa  
195001 aatagcatc aatattcacc ccatcatgct caaaaaagct agtatcttct atagctacaa  
195061 gagcttctat aaggcgtgga ggtaattctt cataatttgc ataaaaacga tgttgttcga  
195121 agatattagc tactaatttt ccatttctat cgtaaatttg cgttgtaagt ggaggtttgt  
195181 attctttaaa agtatatcct tgtgtatctg catttgtaaa aagataagct acataaacia  
195241 atgcagcagat gaaacacatc acaaaaaatg aaaatatata ttttaaaatt ttcataaata  
195301 agcctttaaa ttttgagtat caagccctaa agcagtattt aaatttctt cttgtttgat  
195361 aatatagttt ttatgaaaac cctcacacat aatcgctcct gccttacct tataaagtcc  
195421 attttctaca taatctttca aatcatgagg gtcaaatttt gaaaaataaa gcgttgtttt  
195481 tgaaagagag aaaactcttt tttttgaatt ctttaacaaa aaagcactta aaatgctagc  
195541 acattttcca tcttgtaaat caagcatttc ataagcttct tctttggtat ttgccttagt  
195601 aagaatttta tctcctatgc aaactatgct gtctgcaaag agtaaagttt tatctttaaa  
195661 tttttcttca taagctgtgc aaaattgtct ttctttttct aggacaattt tttgcacata  
195721 aacactaggc tttaaatttt tgtctaaatt ttcatcatag tcaaagctta tttgttgaaa  
195781 ttcaatcttt gcctctttga gtaaattcaa tctagaaaca gaacttgaag caagaattaa  
195841 cattgcttaa agtccttttt ggatcaaatc taaagcctgt tttaaagctt catctatctt  
195901 gcttatatct ttaccacctg ccgtagcaaa atcatctctt ccgccccat tgccacctaa  
195961 aatttgagca atatttttaa ccaaatttcc agctttttaa ggacaatttt tcacacctgc  
196021 cgcaagggtt atcttatcat cttttgcttg tattagcaaa atagcagctt tttcgaattt  
196081 gtttttaaat tcatcaatca tagtttttat atcaccactt tctacgcatt caacgcaaat

196141 ttgaactccg ttgatattgc ttgagttaag ctgtgattta ttggaatfff taagctcatt  
196201 ttttaatfff agaatttcat ttttaagfff ttttacccca agacttaaat cattgctfff  
196261 aagctcttct ttaagattta aatfffctatt cataaaagtc ttgcaaaatt ctaaagctgc  
196321 tcttgaaca accgcttcta tacgccttac acctgcactt acaccacttt ctttaactat  
196381 gtaaaaactt cctatttgag ctgtatfff taccatgagtt cctccgcaaa gctctttact  
196441 ttcacctaag gttaaaacgc gtacattgcc ttgatatttt tcattaaaca aagcaatggc  
196501 tccactffff ttagcatcct ctaaaggcat atfffctaaa attgcttcgc ttgagctaata  
196561 gatcatttca ttaactcttt tttcaatact ttctaattct tccttgctta aagctttgtg  
196621 atgagtaaaa tcaaatctta atttattgct ttcaacccaa gaacctgctt gactgatatg  
196681 agagcccaa atttctctta aagcgtgggtg caaaagatgg gtagccgaat gatggcgtgc  
196741 agtttgttct cttttatcgg tatcaatfff tgctatgatc ttatcattaa gcttgatttc  
196801 ttcattagct tttacaagac taagattgag attgaaaaac ttttgagtat ctagcacttc  
196861 gctagtctct atatatcctg tatcagcaat ttgccccca cttgttgcat aaaaaggagt  
196921 attatcaagc ataaccagc ctaaaccctt aagacttgaa acttctttaa aatcttcac  
196981 taaaagagct aaaacggtgg cttgacattc tgtttttca taaccacaa agcaatfff  
197041 tccaaatfff tcaagtaaat ttttaaaatc tccacttgct accttatcgc cgcttccttt  
197101 ccaagaagct tttgcacgat tttttgtct atctatcaat tcttcaaat tagcctcac  
197161 taccacaaga ttttttctc ttaacatata ttgctgtaaa tcaagtggaa aaccataagt  
197221 atcataaagt ttaaatgcaa cctctccgct aaaaacttct ttggtgtttt taagctcttc  
197281 attaaaaatt tcaataccgt tttctatagt gcttaaaaat ctctcttctt ctaagcggat  
197341 ttgctctfff ataaaatctt tcttttcatt aaggtaggta taatgatcac ccataagctt  
197401 gcaaaccaca tcaactaaat tatacataaa aggtttttta agcccaata aatacccatg  
197461 tcttaaagca cggcgtaaaa tacggcgtaa aacatagccc ctaccctctt tatcaaaact  
197521 cgctccttga gcaagcaaaa atacactcga tcttatatga tcagctataa ctctaaagct  
197581 agctccactt tcataaacat aagtttttcc acaaagtttt gcaatffcatt tgataatagg  
197641 cataaaaagc gagctgtcaa aattgctaaa tttgccctct ttgatagctg taaccctctc  
197701 aagccccatt cctgtatcaa tacttggttt ttggcaaagg gtaagtttac catcagcact  
197761 tctttcatal tgcatgaaaa caaggtcca aatfffctaa aacctatctc catctccacc  
197821 catataatct tcttcgcat taaaatactc ttcacctga tcataaaaaa tctcactaca  
197881 aggaccacaa ggacctgtat cgccatttg ccaaaaatta tccttatcac caaatctata  
197941 aatcttttct ttttgatata gtttttgcca caattcaaac gcttcatcat cgctttcatg  
198001 tacggttaca taaagtctat ctttaggaag ttttaatac tcagttacaa attccaagc  
198061 ataagcgata gcttgttctt taaaataatc cccaaaactg aaatfffcta acatfffcaa  
198121 aaaagtatga tggcgagcgg tatagcctac attatctaaa tcattgtgct tccccctgc  
198181 tcttatacaa gtttggaac ttgttttgcg tgggtgggttt ggacgaggca cttctctat  
198241 aatatactt ttaaaaggca ccattcctgc atttgtaaaa agcaaagttg catcatcagg  
198301 aactaaagga cttgaagggg tgatttcatg acccttagac ttaaaaaaat ttaaatattc  
198361 acttctaaca tcataaagat tttcctaaga aatfffctata aaagcatatc ataccaaaat  
198421 tactttaaat taagtaaaac taaaatacaa taagcctttt taattaattt ctttaatttt  
198481 caaggttttt tatgaatfff atcaatcttc aagctcaata tcttaaatat aaagaagaaa  
198541 tcgattctga aatcgcaagt gttttatcaa gctcctcttt tatagggggg gcaaaattaa  
198601 atgaatttga aacaaattta gcccaatata ctcatgtgca acacgcata ggatgctcaa  
198661 gtggcacaag tgctttatat cttgctttaa gggctttaga tatcaacaa ggagatgaag  
198721 tcatagttcc tagctttact tttatagcca ccgctgaaat ggtagcacta ctgggagcta  
198781 agcctgtatt ttagatata aatfftagata atfffctaat cgatfffcaa ctcttaaaaa  
198841 atgcatcag ccccaaaaac aaagcaatta ttgctgtgag tatgtttggt caaatgagta  
198901 atttacaaga attaaacacc ttttgcgaaa gtaaaaaat aagcttgatt gaagatggcg  
198961 cacaaagttt tggagcaagc ttttaagggtg aaaaacttgc ctctattgcc aaaatffcatt  
199021 gcactagctt tttccctct aagcccttag gagcttatgg cgatgggtgga gcgatfffct  
199081 gcaatgatga gagcatagct aaaaaattaa gaatfffact caaccacgga caaactgatc  
199141 gttataaaca tgaatttata gggataaatg ctctcttga tactcttcaa gcggccattt  
199201 taaatgcaaa actaaagcac ctgatgaag aaattaacaa aagacaagaa atagcaaaat  
199261 tctacaacga aaatffgaca aatffgcaaa ttccaaagat tgatgaaaa gcatcagtg  
199321 cttatgcaca atatagcgtt ttagtggagg atagagctag agttataaaa gcttttga

199381 aagcaaacat tccttatgct atccactatc ctacgccact tcataaacia ccttgcttca  
199441 gtgaattttc gcatttataa ttagaaaaat cagaatttgc gagtgagcat attttatcct  
199501 tgccattttc agcattttta agtcaaagtg agcaagaaag tgtaattaaa atatttaagg  
199561 aaggactatg aaattagatc aagtgggctc ttttttaaga cccaaaattt taaaagaagc  
199621 tagagaaaat tttgccttgg gaaaaatcga tgaagaacia cttcgagca ttgaagattc  
199681 ttgtataaga gatcttttag aagagtgtga taaggcggga atttattatt taagcgatgg  
199741 agaattacgc cgttcttggg ggcatcttga tttttactgg ggttttgggt gcattaaaaa  
199801 aatcaaaaaa gaaaagggtt atatctttta agggatagaa acaagagccg aaggtattga  
199861 aattgaaagt aaaatcgagt gcaataatca tcctttttta aaagattttg aaagattaat  
199921 gcaaatcgca aaaggtttaa aaatagatac aaatcgctta aaacttacca ttccaagccc  
199981 ttcaatgctt ttatatatgc tttttatccg tggaggcaaa aacacagaat ttaattacta  
200041 tggtagacat tttacaaaac ttaaaaatga tatttttaat gcttatgaaa atttttacaa  
200101 agaatttgca gctcttgggt gagtatatth gcaacttgat gacacaagct ttggttcttt  
200161 atgtgattat gaattttgtg ctttaaataa aattaacgca gatgatattt gcgaagaata  
200221 tgtagatttt ttaaatagaga gtttaaaaac tatgccaaaa aacataatga gcgagattca  
200281 tatttgtcgt ggaaactacc gcagtcgcta tgtggcaagc ggaggctata tgaagtcgc  
200341 taagaagctt tttggcgaac ttagagtcaa taaattcttc ttagaatttg atgatgaaag  
200401 ggctggagat tttgaacctt taaaatataa aaatgatcaa attgaggttt taggaattct  
200461 tactagcaaa accaatgaaa gtccgagcgt agaagagtta aaagcaagag tgaataatagc  
200521 agtcaattt ttaagtccaa aacaaattga aatcagcaca caatgtggct ttagctccac  
200581 tgaagaagga aatgaaatct tcactcattc tcaatgggaa aaaattaaac ttttaaaaca  
200641 agttttaagt gagcttgaaa atgaaggatt tttctcttga aaataggaat tataggcctt  
200701 ggaaaaatgg ggcaaaacca tttaaacgag cttggtaaaa ataaaaattt taaaatcaat  
200761 gctttgtttg atatggttga aaataaaaaa ttaaatacac ctttttttac caatttagat  
200821 gaatttttaa atcaagataa tgatatcatc atcattgcaa caccgacaaa ttcacattta  
200881 gaaatagcta gaaaggtttt ttgtaagtgc aaatgcgtat tgattgaaaa accttttagcg  
200941 ctgaatttaa atgaaataga tgaattttca aatttagcta aagaccatga tgtaaaagtg  
201001 ggtgtgggat tttgcgagag atttaaatcct gcggttttag ctctaaaaaa agagcttcaa  
201061 aacgaggaaa ttatcagcat caatatacaa agattttcca cttaccctca aagaatcagt  
201121 gatgtaggaa ttttacaaga tttggctgtg catgacctg acttgcttca ttttttaagt  
201181 ggagagaaaa ttataaacgc taacatttta aaaagcttca ataaagacia acaaagagaa  
201241 gatgagagca ttataacttg caagctagaa aaaacgatcg cttgtgtgca tcaaagctgg  
201301 aacagtacgc aaagactaag aaaaattaca cttgtaagta aaaatcattt ttacgaggca  
201361 aatttagcag acttttcctt aagcaaagac ggacaaagct tggagctgat gacacaaaca  
201421 ccgctttttg gggagcatat ggctttatat gatttgtttt taaataagga aaattaccta  
201481 gcaaatatac aaaatgctta cgctgtgcaa gaaattttag aagaatttta atttttctaa  
201541 aataatgtaa catcatccaa ataacttgag cttcaataaa atcttcaaat acttaagata  
201601 aaaaaattta ttgattttta atccatactg aagtaaaaata aaactaaaaa aggtttttta  
201661 atgaaattgg ttttattttt aaatatgggt ggagccacia atttacaaga ttgtgaaact  
201721 tttttaaaaa atatgtttta cgatccttat attttaggta ttaaaaaata atttataaga  
201781 agattttagt cgtggatcat taaaaatct cgcgtaaaag ctatgagaga aaattataaa  
201841 caaatgggtg gaaaatctcc acttaatgaa cttactcaaa gtttgtgca aaaacttaat  
201901 gcaaaaacia aagactttta atttgacttt gtcaatcttt atgtgccacc ttttgcaaat  
201961 gaagttttgc aaaaatacac tttaaacgaa aatgatgaaa tcattctttt tcctctttat  
202021 ccacatcact caagcaccac agttacttca tcgcttgaag ttttaciaaa tgaattttca  
202081 aaacaaaaca tcaaagcaaa agtaaagacc atggacattt tttatgaaaa tacgctttat  
202141 aatgaaatga ttattttctca cttttggct aaaaaaagt agttttagtc taaaactttg  
202201 attttttcag cacattcttt accgcaaagc attattgaca agggcgattt atatgaaaaa  
202261 catgtcaatc atcatgtaga gcttttaaaa gaaagattaa aagatcattt tgatgagatt  
202321 atcttagcct accaatcaaa actaggtcca gtaaaatggc ttgaacaaa tacaagcgat  
202381 attttgcaa atttagataa caaagctttg atttatccta tttctttttg catagattgt  
202441 tctgaaacga tttttgagct aggtatagag tataaacatt tagcaaaagt tgattatgat  
202501 ttaatcactt gtccaaatga tagcgatgaa tttgctcaat ttgttttaaa gtatttatct  
202561 gatttttaact gagaatgaa tttgaaagctc ttgtctatca ttttttaaaag attaacaagg

202621 actttttggt aaaaatttag ccaactaagc caaagtataa gctttttccc cgtgcaagct  
202681 tacatctaag cttttttgct ctacttcttc ttttaccctt aagtctgtaa aacaagaaat  
202741 aatcttaaaa ataataaagc ttataagagc tgacaaaacc acgcaaatca caatagcaaa  
202801 aatttgctct tttaaaagct ctaaacttcc actgataaaa aatccctcgc caagtgcatt  
202861 ttgggcaatc acattaggat ttacttttagc acttgcaaaa agccctgtgg caattcctcc  
202921 ccaaatacct ccgattccat gcaaagaaaa agcatctaaa gaatcatccc atttgagttt  
202981 gtatttgata aaactcaaac caaaataaca aaatacagaa gacaaagccc ctataacaag  
203041 agaagcgtaa atatctacat aaccacaagc tggagtaatc cccacaagcc ctgctacaag  
203101 cccactaagc ccacctaana tagtcggttt tttatgaata agccactcaa gtactacca  
203161 agataaaaag ccacaagccg ctgatataat acttactata aaagcattga tagcaatatc  
203221 attcatttcg ccagcacttc cagcattaaa acctaaccat cctataaaaa gcaaaatcgc  
203281 acccaagaaa gcataaggaa tagaatgcmc gtttttatcc tcatcatcac tttttctagc  
203341 gcctaccatc aaagctccta caagtccggc aaccccagag ctaatatgca caacaccgcc  
203401 cccagcaaaa tcaagacttc ctcttttaag caaaaatccc tgcctactcc aaatcatatg  
203461 cgctaacaca tcataaacta aagtactcca aaaaagtaga aatatacca agacaccag  
203521 ttttaattctt cccaccaaag agcctgttat aatagcagat gcaataagtg caaacatcat  
203581 ttgaaaaatc acaaaaagaa tattcggaac gcctgaagcg ttgtatccgc taatacctc  
203641 taagaggaaa ttctcgaat ttctacaag cccaagtcct tcatctttac caaagaaaag  
203701 actaaatcca agcactacc attgtaaagt aatgacacca aaaacgataa agcaattcat  
203761 tatggtatta agagtatttt tacttcttac catacctgaa taaaacattg ccaaagctgg  
203821 agtcataagc aaaactagca aagtacacaa cacaataaaa cttgaattta tgcattcat  
203881 ttacctatcc tttcttaca aatttaattg cgagataatt atatttaaaa tggtttaaaa  
203941 aaatataaat ttaagaaata ttttatatat tttttttatc aaagtttatt tttttatctg  
204001 aaattaccat aaataggac tttaaaaaaa tatttcaatt ctctataact caaatttact  
204061 agcattaaga taaaaaattg gagctaaact gaaaaaattt aacaaaatta aaaaagaatt  
204121 cttgcaagat ggtaaagaaa aattttgatg atttggtaaa agttttttaa attaaaagta  
204181 gaaattatct agtattaaaa aagcaattgc gttttaaaat agcccaaaag ctcttctttg  
204241 gctttgaaga tatcatcagt gtttagctca aaatctattt tttgtggctt tttataactc  
204301 ttatcataat aagccaaaag caaggcaata agcctttgcc atttcttttg ctcataactt  
204361 tttagcaaat cctgacgaaa attgacactg atataaggac taatcttagc aagacattct  
204421 ttaaatttta aaggggtcat tttttcttga tagatctttt gtatcctgtc tatgctcttt  
204481 tctaaagaac aaaaacaatg aattttaaat gctttttgca ttttttcata aagctttaaa  
204541 ggcaaaaacta tttcacctat tttacgactt tcgctctcta taaagataaa atcttttaaa  
204601 gaatttaaaa catgaaaaag gcttgcttca aaagcttttt gcgtaggctg agcacctaaa  
204661 atatcaccaa aagaagatcc tagatgattt gccatttttt ctaaatttaa atgatggggc  
204721 aaaagctcca aaagctctgt tttccacag cctgtattac cacaaagagc aaaaaaatct  
204781 aaatttatct cattatcaaa ataatgcgcc aaaaaacttc tataagcttt aaagccacc  
204841 tttaaacgca ccactctata gcctaattcg ctcaaaatca ctgcaataga ttttgaacgc  
204901 aaaccccccac gagagcagta aattccgatc ttatctccta tacggaattt ttgagtaagc  
204961 tctaagatat gctttgacat attttgacaa atataactcg cccccctagc cttagccaaa  
205021 gcttgatttt ttttataaat tgtccctatt tcttgatatt cttcatcatt taaagcataa  
205081 aaattcaacg cccctatcaa atgagaatgt aaaaattccc taggacttct tgcacgatt  
205141 aaaagagaga aattttcttt ttgaaattcc gtaaaatcta cttcatttaa catttttaaa  
205201 tgccaaaaca agtttttgat aaacttgttc tatattggta ccacaaacc tagtctctcc  
205261 tatagtggtg ataaaattag tatctcctgc ccaacgcggc actagatgat aatgacaatg  
205321 aggagctatc ccagcaccgc catctttact caaattcata ccgatattta ctccgctgc  
205381 atggagtctg ctttttaaaa ttcttaccct tagacgcaca aatttactta tctcttgcca  
205441 aacttcatca cttaaatttt ctatatgctc ttcatgcaaa taaggattaa tcataaaatg  
205501 ccctgcagaa taaggatagc gattcatcac gccaaaacaa tgcttagctc taaaaatcac  
205561 ccctaattct tcatcgcttt tgattttatt agcacaatca caaaaagggc actcgctctt  
205621 ttctttttca aaatactcac ttcgccatgg tgcatacaaa tactgcattt ttatcctttt  
205681 aaagcaaggc tttcaaagcc tctccttcat cattttgacg cataaaatat tctccaatta  
205741 aaaaagcatc aacacctaaa ttttgcaaat gtcttaaaaa atctttattc tctaaaccac  
205801 tttctgcat aataattttt gaatttggaa tttgtggaat aagcttttca cataaattca

205861 tatccataga aaaatcatcc aaattgcat gatttataacc tataatatca gctcctgaaa  
205921 aaatcgcttt actcaaactc tctttatcgt gaatttccac caaagcttca agtcccaaat  
205981 gccttgtaaa ttcaagtaat cttttaagct ctttcatact taacattcta gcgataagca  
206041 aaacaaaatc cgccccataa accaaagcct ctaaaatttg atactcatca aaaataaaat  
206101 cttttcgcaa caaaggagca cgcgtataac ggcgtatcat actaaggat tctaaactcc  
206161 cttgaaaaaa atgcbggttct gttaaaactg aaatagcagc agcgccattt ttttcgtatt  
206221 ttaaagctat atccaaagga tcgaaatfff cccttataac ccccttgctt ggactggcctt  
206281 ttttaacctc tgcgataatt cttacttcat tttctactct ttttaaagca gctttaacat  
206341 ctttaggaaa aaaaggattt gatgctaaag atcgtcccaa cacatcataa ggcagttgag  
206401 ctttagctc tttcaaactc tctttagttt tttcaaaaat tttatctaaa atcatggttt  
206461 aatacacgcc tttatcgctt ttgcatgagc tttgctctca tcagaatttg caaattcttt  
206521 atcctctaaa gtttgcttca aaatttccca agccttttga caatcacctt gtttataata  
206581 cccccacgct aaagaatcta aataatataa attttgaggc tcttttttca aagcaagatg  
206641 aactaatttt ataccctttt caagatctaa atcataatct atcaacaaat atccataata  
206701 atttaaatac aaggcatcac tattttcatc aattgcatcg gaaaattttt cactcacaag  
206761 agtaataact tgtgggggtga tttttttttc caaatttgct tcttcaaatt caaaaattgc  
206821 tgcacgcaaa agatattctt tctcttgagt gtgtttataa atttgcatac taagatcttt  
206881 tgccttgccg tatagtttta atctttgata caaataaagc tttacatcat catctacatt  
206941 atattttaag gcaaaatgca atgcttcttt atctttattt tgagcattta aaagctcgat  
207001 aagagctaga ataaaacttt gattttttgt aatattataa agctctatat aaatttcttg  
207061 taaagctttg tcaattccct cgtcattata aatctttgct agtaaaatac aagttttaag  
207121 agtacaacca ttaatatttt ttgaagtttc aagtatattt ttaatgcttg aagtatcgtt  
207181 taatcgcga taaacacca caagcttaaa caagatctcc tcgttttgaa tttgattata  
207241 agctagttgg taatacttta tggcatcttt taaattggtt tggcgcatta aaacatctcc  
207301 ataaagctct aaatttcttg gatcatcact ttttttcttt aaaagctctt cgataagctt  
207361 ttgagcctcg ttaagattgt aagaatttaa ggcataaagt gcactaagac gcttaagatt  
207421 atcactctta tcaagataag gtttagctat attatttatt tcttcttttt tgtcaagatt  
207481 atttgctaga gtcagcaaaa aagcattttc taaaaaatta gtaatattat aatccctaaa  
207541 aagtgcctaa aactcatctc tagcttcttc gtattgatta aaatattcat aattataagc  
207601 tttcatgatt cttaaactca attcattact cttttgttgc tcataattag gataagctat  
207661 aaccgttttt gaagccccgc acgctgttaa aaaaaagcct attaagacaa ataacaaatt  
207721 cctatacatt ctttttttag ctctcttga tgtgttttaa aatattccca aaaaggaaag  
207781 gtacggcatt gcatcggagc aaaatcgtag atagagcagt ttcttttctc cttatcaaaa  
207841 aaaatacatg caaatccatc ttcaaatca acctccttaa agctcattct aaagcctacc  
207901 ttttttaaat attttaaaagc aaattctttt tcatctaatt gcaaatgttc tcgcaagcc  
207961 ttttagctctt ctttatttgc aaaaatattt ccactttctc ctgtgcagca tttccacca  
208021 catttctgac aagcattttc atcaaatccg taagaaaaat ctttattaaa tatcataact  
208081 ctccaacctc aatctagagt gaatctcttg catttgttca cttaaattct catttttata  
208141 aacaaaaaaa ggaggtaaaa tctcacatgg tgactttaca ctttttctag cttgcacaa  
208201 tacaagcctt gcttgagtgt tttgatgagt atgcacaaaa cgaattttag ttaattttaa  
208261 ctttttactc tctaaagcaa ggcaaatfff atccaaagct aaagcctcgt aacaaaaata  
208321 caataccccc ataggcttta acaaagcatt agatctagca ataaattcat ctaatgttaa  
208381 atatttttga aatttactta tatttttatg catattttta ctctcatgag ctccatctct  
208441 ataaaaaggt ggattgcaaa ctataaagtc aaatttttta ttgttttgaa aattcctaaa  
208501 atcttcgtgg aatatctcag cttgtatatt gttttgtttt aaattacgat gaattaattc  
208561 tatattttct tgctgtatat caagcaaaga taaatctaaa ttagaacaa attttttaag  
208621 taaaattcct ataataccac atcctgaacc tacttctagg acttgatttc ttacaccat  
208681 ttctaaaaca aaatcagcca aaagcaaaga atcgtattg taacgataac catcattcaa  
208741 ttgagctaat ttaatattat cttgcatttt caatgagttg gaattttaac tcttttcaaa  
208801 ggagcatttt ctttgcttgt gttttgttct tgttttaaaa cattattttg acttgcgaaa  
208861 tctataaaat tttgagcaaa aagtaaagag gataataacg atattacgaa aaaaaatttc  
208921 aacataattt tccttgaat ttgaattcta ttttgagttt atttaaaaaa cttagcttgg  
208981 caaaataaat acaaacttta aatggtgtcc acggcgagat tcgaactcac ggcctcaaaa  
209041 tttaggaattt tgcgctctat cctgctgagc tacgaggaca aaagcgggaa aatcccgtt

209101 taataacttaa ccatttctct ttttaatgat ttcctcagca acatttttag gaacttcac  
209161 ataatgatca aattccatag aataagtcgc acgaccttga gtttgacttc taagatcagt  
209221 tgagtatcca aacatttcag ccaaaggaca aaatgctgtg atgattttat ttccacctct  
209281 ttcattccata ctatttactt gaccgcgacg cttattaaga tcgccaatta catcacccat  
209341 ataatcttca ggagtttcaa cttcaacctt catcataggc tcaaggatta cagcacctgc  
209401 ttttctagca ccctctttaa agcccataga agcagcaagt ttaaagcca tctctgatga  
209461 atccacctca tggtagcttc catcataaac agttacttta acatcttcta ctggataacc  
209521 tgctaaaaca ccattttgta atgcttcttg aacaccctta tctactgcag gaatatattc  
209581 ttttgggaatt accccacctt tgatatcatt aacaaactca tatccactac ctggctcaag  
209641 tggctcaaga cgtaagaata catgtccata ttgaccgcgt ccacctgatt gtttagcgta  
209701 tttgtattct tgctcaacag tttttctaag agtttcacga taagcaactt gaggttgtcc  
209761 cacttcagct tctactttaa attcacgaag catacagatca acgataatth caagatgcaa  
209821 ttcaccata cctgaaatga tagtttgacc actttcttca tctgtagaaa ctctaaagct  
209881 tggatcttct tgagctagtt tatttaatgc aatagacatt ttttcttgat ctgctttggg  
209941 ttttggctct actgcaacag aaataacagg atctgggaaa tccattcttt caagaattac  
210001 tttatctttt tcaactgcaa gtagtctctc tgttaaagta tctttaagtc ctacaactgc  
210061 accgatctct cctgctgtaa gaactttaat ctcttctctt ttattagagt gcatttttaa  
210121 caaacgaccg attctctctt ttttatcttt gggttagtta taagcataag aaccgctttc  
210181 taaacatcca cgataaacac gcacgaaagt taattgtcct acaaatgggt cagtcatgat  
210241 tttaaatgca agtcctgcaa attcaccatc atcagttgat tttacagaaa cttctgtacc  
210301 atcttcatat tctcctttga tgtttgcaac ttcactctgga gctggcaaat aagctacaac  
210361 agcatcaagt aaagggtgaa cacccttatt tttaaatgca gtcccacaaa gcataggaac  
210421 aatagaaaga cttaaactc ctgctttgat acctgtttta atttcttcaa ggcttaattc  
210481 ttcaccgcct agatattttt ccatcaactc atctgaagtt tctgaaactg cttctatcat  
210541 ttttagtgca tattcttccg cttttctttt aagttcggca ggaatttctt tttctacata  
210601 atctgttggc ttagtatcat cttcccaaac taaagctttc atagttacaa gatcgataac  
210661 acctttgaaa ttatcttcag caccgattgg aatttgaagt ggaactggat tagcttttaa  
210721 gcgattgca atttgatcct ctacattata gaaatttgca ccgattctgt ccattttatt  
210781 tacaaaaact attcttggaa caccgtattt atttgcttgt ctccaaacag tttcgctttg  
210841 aggttgacc ccacctactg aacaaaatac tgcaacagca ccatcaagga cacgcataga  
210901 tctttcaact tctatggtga aatccacgtg gcccgagtg tctataagat tgatttgatg  
210961 atctttcaa aaacaagtcg tcgcagcaga ggtaatagta atacctctt ctttttcttg  
211021 ttccatccag tccatagtcg cagcaccatc atgcacttcg cctattttat ggctcatacc  
211081 tgtaaagaaa agaattctct cacttgtagt tgttttccc gcatcaatat gtgcagcaat  
211141 accgatattt ctaactcttt ttaaaggagt acttctagac attttttct cttcttacca  
211201 gcgatagtga gcaaatgctt tatttgcttc agccatttta taagtatctt ctttttctt  
211261 aaatgaagca ctttgctat ttgccgcac taaaagttca gctgcaagtt tatctatcat  
211321 agttctttca cttctttttc tagcaaaaga aataatcaa cgaattgcca aagcttgttg  
211381 tctagcagga cgaacttcta ctggaacttg ataagtcgct ccacctacgc ggcgagattt  
211441 tacttctagc aaaggtttaa tttttcaat cgcatcatta aagatatcaa tacctttttt  
211501 ttgccacct tttttatcga taagttctaa agcgccatac ataatagtag tagctgtgct  
211561 ttttttacca tcatacatta aagaattaat aaattttgtg attactttgt taccataaat  
211621 cggatcaggc aagacttctc ttaccggagc ttttcttctt ctattattt ttccttcaaa  
211681 ttttaaattt tactcaaca aaatcaaatc taacggattc gtctgtctaa aaaattactt  
211741 agcacttgct ttagggcggt ttgcaccata tttagaacga gaaactgttc tttttgcaac  
211801 acccgagta tcaagcgac cacgcacaat atgatatttc acacctggta agtcttttac  
211861 cctaccgcca cgcactaaaa caatgctgtg ttctttagg ttgtgacctt caccaccgat  
211921 atagctaadc acttcaaagc cactagtaag tcttactttg gcaactttt ttaacgctga  
211981 gtttggtttt ttaggagttg ttgtataaac cctagtgcaa actcccctt tttgtgggca  
212041 atttttaagc gctggagatt tagatttttc taaaactttt ttgcgctctt ttctaacc  
212101 ttgatttatg gtaggcaca taattccttt ctttaaaaaa tataataaac tttggatgat  
212161 atctaaattt tacttataag attataaact ataaataatt taaatctttt tgcaaatttt  
212221 ctaaaaaata atttacaag ataaatgttt gattggtaga aaatgaaaat actttaccat  
212281 ttttaatttt gttttgtatt tcagttttat aaatatctta aattttataa tataaaaaata

212341 aagaagagaa aataatcaaa ttgagctttt caaatcaaga taaaataaaa aatagccta  
212401 aaaataggct attttcatta ctcttgttct ttgagtttta aattttgttc tccgtaaagt  
212461 cctgttccaa caggaatcat tctacccaaa ataacatfff cttttaagtc ttctaagtag  
212521 tcaaatttac ctgcgatact tgcttcagtg agtacttttg ttgtttcttg gaatgaagct  
212581 gcagaaatca cactatcact tcctatcgct gctcttgtaa cacctaaaag tacaggctca  
212641 gcaatagctg gctctccacc caatctaaga attctctcat tttcttcgcg gaatttgcgt  
212701 cttgaaacca aatctccttc gataaattta gtatgtccac tatcgataat tttaacctgt  
212761 cttaacatfff gagaaactat aacctcaata tgcttatcag aaataacaac cccttgacct  
212821 cgggtatactt gttgaatfff agaaatcaag taataatgca aggctttttc gcctaaaatt  
212881 ttaagcacat cgtggcttga aactactcca tcagttagct tctcgcgccg gtgaataaat  
212941 tcaccttctc ttacttgaat atgttttgat ttatcgatca aatactctgc gcttgtgcca  
213001 tcttctgctt ggataatcaa tctttctfff gagcgtaaag gcttatcaaa acgaaccaca  
213061 ccatcaatct ctgcaattac tgctgcattc tttggttttc ttgcctcaaa aagctctgaa  
213121 actcttgga gacccctgt gatatctfff gatctcgcg ctgcttttgg agtttttggc  
213181 aaaatatctg cttgagaaat tttatcacca tcatgaacga aaataaccgt ttttggctcc  
213241 aattgatagc gcactgctff atcgcctttg cctgcgatta ttaaggttgg tcttaccocg  
213301 cttggtaaatt attcattaat cactagcgag cgtttgctg ttgcttcatc gatttgcctca  
213361 tccgcactat aacctgcttc tatacttcca aaacttacca caccatcaat ctctgcaatg  
213421 atagtgttat tataagcatc ccattctgcg ataatagatt tttcttgttt tggtgacta  
213481 gcaattatag aatcaaaatt aacctcttcg ctatcattaa attctattct tgactccctt  
213541 ggaatatagt gtctttttgc ctctctatca ttttcatcag caactacaac aaaaaatcct  
213601 ttttctttta ctatatcacc ttttttgata tttctaacc tatcaagtcc atcaccttta  
213661 agaatataga attttagaatt ccccttttcc cctgctttga tttttgtac aacaggatct  
213721 ccatctttta caagaatfff acttgcaaat ggaatacggg ttggaacatt ccaaccctct  
213781 ttaatcatct caacaatact ttcatfffct tcaacttcag caccactttg atatggtaaa  
213841 taaagttttc cgtcaatgct tccgctaacg cctgctaatt catttggttt agcaagatcg  
213901 tttttctaa gaatatatff tgcttcttgt tttttatctt ttatagaaat aattacatct  
213961 tcgtgaatat tttctatatt gacaatacct ttaaattggg ccttaatfff tggctccaca  
214021 agtaaaatag ccgcatttct acgattagct actatatctt taccttcttt gttttataaa  
214081 gttttaagggt tataaaatct tataaaacct tctttttggg cacttacttg cctatcttgt  
214141 aatccgtac tagcagttcc cccgctatgg aaagtcttaa gtgtaagttg agttcctggc  
214201 tcaccaatag attgagcaga aatgataccc actgcctcac ctggcttaac aagcttgctc  
214261 tcgccaagat taattccata acatfffgca caaattcctt ttttagcttt acaagtgatt  
214321 ggagtgcgaa tatttactc ttttacacca ctttctccta atattctagc ttttcttca  
214381 tctatcaaag tgccttctgc aaaaagcaca gaatttgtaa taggatctat tacatcttca  
214441 gctataacc tacctaaaat tctctcttct aaagtctta taatagaact atctgcggtg  
214501 atctcattaa tttcaacacc ttcgtgcggt ccgcaatctt caacagtgat ttttacatff  
214561 tgtgccacat cgataagttt tcttgtcaaa taaccgcggt ttgctgtttt aagagcagta  
214621 tctgccaac ctttcttggc tccgtgagtt gaaataaaat actcaagaac attcaaacct  
214681 tcacggaaat ttgaaataat aggtgtttca ataatcgatc catcaggttt agtcataagc  
214741 cctctcatag cagcaagctg agaaatffga gctgcactac ccctagcacc tgaatctgcc  
214801 atcatataaa tagaattaaa gccttcttca tctttttcca caagcttcat catatctctt  
214861 gaaagagtat tattggtagt tttccaaata tcaataatff tgttatatct ttcacctgaa  
214921 gtgattaaac caagattata agaatfftgaa atffctctta cttgcttttt agcctcatca  
214981 atagcctfff gtttatcact aggaacgata atatcagcaa tagatataga aacgcctgct  
215041 ttagtgtcat attcaaaacc taaatffttta agtttatcta aaaaacttgc agtaatffgt  
215101 aaaccaccct gtttgtatac ataatccaca agcgcagcaa tatcttctt ttttaaaacc  
215161 ttattccaca tattctcagt aacaaaatca ggcaaaatag atttaataat aagtcttctc  
215221 gccgtttag taatcttctt gccatcaacc atagtttgaa tactagcatg aatatcaagg  
215281 ctttacttt caagagccat cataacttca tcaatgcctg tgcatatfff atgtgagcct  
215341 tttgctcca ttttttcca agaaagataa taaattcca aaaccatctc ttgagaagggt  
215401 acagttacag actttccact tgcaggcaag agaatattca tggagaagaa cattaaaacc  
215461 ttacactctg caatcgcttc ttgagaaagc ggcacatgta ctgccatffg atccccgtca  
215521 aagtctgcgt taaatgccgc acaaactaaa ggatgaagct gtattgcttt tcttcaacc



215581 aaaacaggat gaaaagcttg gatagaaagc ttatgtagag tcggagcacg gtttagcata  
215641 acaggatgcc cttttaccac ttcttctaaa cattcccaaa cttcattggt tttgttttct  
215701 atcatttttt tagcttgttt tactgtagta gcataacctt tttcttcaag ttttagctaat  
215761 aaatgtgggt taaaaagctc taaagccatt tttttaggca agccacattg atccattcta  
215821 agttttggcc ctacaacaat aacgctacga cctgaaaaat ccaccctttt acccagcaag  
215881 ttttgtctaa aacgacctg cttacctttg ataatttcac tcaaagattt taatggacgc  
215941 ttatttgctc ctttaactgc attagcacga cgaccattat caaaaagcgc atctacagct  
216001 tcttgaagca ttcttttttc atttcttatg ataatttcag gcgcatcaag ctccataagt  
216061 tttttaagac gtgtatttct attgataacg cggcgatata aatcatttac atcagaaact  
216121 gcgaatttac ctccatctag agcaaccaa ggacgcaaat caggtggtaa tacaggtaaa  
216181 tttgtaatca tcatccattc aggacgattt ggtactgcat cttcattggt tgtatttgcg  
216241 ttttaatttg aatttaaaaa gttttctaca acttttaaac gttttataat ggtttttttc  
216301 ttagcctctg aatttgtagc agtcatttct tctttaagct ggttcaaaag tgccacaaga  
216361 tctaaatttg ctagcaagtc gcgaactacc tcgccacca ttcttgcttt aaaaccactg  
216421 ttttcataac gctgcattaa attttgatat tgctcttcgt ttaatacgtc gcagtattct  
216481 actttttttg tgctttcatt atcatagtat gcctctctg cattttctac aatataagct  
216541 tcataataaa gtacgcgctc aagatctttc atcttaacgc caagaagtgt tcctatacga  
216601 cttggaagag aattaacata ccaaataatga gctactggag ttacaagttc aatgtgtccc  
216661 attctagaac gacgaacttt tgaatttgca acttcaacc cacatttttc gcatttaaca  
216721 cccttaaaac gcattttttt gtattttacca caaagacatt cataatctct aataggacca  
216781 aaaattttcg cacaaaaaag tccatctctt tctggtttta aggttctata attaataggt  
216841 tctggctttt ttacttcgcc ataagaccaa gatttaattt tttcaggact cgcaagtcta  
216901 agttgaaatg cttcaaagtc cctaggtctt gcactttctt tgatttctat tactttaaat  
216961 ttactcattg tcttcatcct tgtcaaaaaat ctcaacatct aaagctagag atttaagttc  
217021 attagtcaat acaaaaaatg tctccggaat tcctgttgct gggacatttt ctcctttggt  
217081 aagcgcttta taggcactga atctaccttc aacatcatca gattttatag taagcatctc  
217141 tcttaaagta tgagctgccc cataagcttc aagtgcccaa acctccattt caccaaatct  
217201 ttgtccacca aagagtgcct taccaccac aggctgctga gtaaccaaac tataaggtcc  
217261 agtacttcta gcatgaactt tttcatcaac caaatggatga agttttagca tatacataca  
217321 tcccacatga actctctcag cgattttttc tccagtacga ccatcgtaaa gctctgtttt  
217381 accatccatg tcaatctttg ctatttcaaa aagttttgca aactcttcta tatttactcc  
217441 ctcaaaaaca ggggttgcaa atttaacacc cttgctcaa tctcttgcatt aatttaaaag  
217501 ctctcatca cttaaatttt taatgaattc tttttcattt gcaagtcttg ggatagaaca  
217561 tatttcaagc atttttgctc ttaattcttt aatgaaatct ttttgttttc tgtcaaaaat  
217621 ttcttgaatt tgatcaccca gtctaagccc tacaagacct aatggctttt ctaaaatttg  
217681 tcctatattc atacggcttg gaacccaag tggattaagt gcgatatcta cactttttcc  
217741 atttggtaaa taaggcatat ccacttcagg tactatagta gaaactatac ctttgtttcc  
217801 gtggcgtcct gccattttat caccactttt aagcttgctg tttgttgcca tatacacctt  
217861 aacaagctta attactccac ttggtaagat atcatctttt tctaaaattt caagcttctc  
217921 atcgtgctca gctttaagct ttttcttctc attttggaaa tgatttttta actcttcgta  
217981 ctctttttga acttcttttag aataagcttt aattaaagta gtcaaggtaa aacgattgat  
218041 tttttccaaa tcttctaggc ttgctttttg tccttttgta tagtttttat cacctatttt  
218101 ttgatcactc atcaaagcag atttagaaaag caacgcgcaa acgcgtagca tctcttctct  
218161 atccatcatt aaaagtctat catgatgctc tttttctaag gacatttttt ctttatcata  
218221 cgatttttaa gctctatcgt ctttttcata tccttttttg gtgaaaattt tcacatcaac  
218281 aactacacct tctaaagaag cagtagcata aagggattta ttcaccacat ggccggcttt  
218341 ttcacaaaaa atcgctctta aaagtctttc ttcaggcgtt ggcttaactt caccttttgg  
218401 agaaacctta ctactaaaa tcatacctgg ttttatatga gtaccaattt ttgctatacc  
218461 gctttcatcc aatgcgcaa catcttcttc tttaacattt ggtatatctt tagtaatctc  
218521 ttctatacca tcttttaatt ctctagcttc tatttctttt tcgtaaatat gaacactagt  
218581 aaaagtatct tcgctgataa ttctttcact tactactata gcatcttctg agttatatcc  
218641 attccaagc ataaaagcaa tcaaagcatt ttttccgata gcaagttcac cttgatccat  
218701 agaaggacca tcagctataa tttgccctgc ttttaaccaca tctccctttt taacaatagg  
218761 atgttgcata aaatttgat tttggtttgt acggagattt ttttcataa tataatgatc

218821 tataaatgga cttttttcat cttcaccaag gataaatatg cttttgttat ctactttttc  
218881 aacaaccca cctcttttag cttttatagc ttcccaagca tcacgagcaa tgatattttc  
218941 catacctggt ccaacaatag gtgctgaaga agttataagc ggaactgctt gacgttgcac  
219001 gtttgagccc atcaatgccc tttttgcatc atcatgctct aaaaatggga tcaagaagc  
219061 agcaacaccc acaaccatac ccgagcaaag atctataagc tgtacttctt cacgtcttgc  
219121 aagtatagtt tctccatctt gtcttgcttc gacaaattct tctattatat tgccttttagc  
219181 atctactttt gtagaagctg gagcaataaa caatccttct tcttgagtag ctgttaaata  
219241 cacaacctga tccgttactc ttccattttc tacttttcta taaggcgctt caacaaatcc  
219301 gagctcattt acttttagcat aagtagataa ggtattgatc aaaccgatat tttgcccttc  
219361 tggagtttca acaggacaaa ttctaccata atgcgtcgca tgaacatccc gtacttcaaa  
219421 accgctctt tctttaacaa gtccaccttc tcctaaagct gacaaacgac gtttatgcgt  
219481 gacttcgctt aaaggattgg tttgatccat aaattgtgag agttgtccac ctgtgaaaa  
219541 ttcaataaatt gtcggtgtaa tcatttttagg attgatcaaa tcataaggca ttactttgtc  
219601 aatatctgca ttcaaagagg taaatztatc tttgatagct ttttgcattt tagcaagacc  
219661 caaatgaagt tcattcgcta aaagttctcc gatagaacga atacgacgat ttctaaagtg  
219721 atccctatca tcaatatgac cttaccatt ttttacttta attaaatatt ttgcagtttt  
219781 gataatatct tcattgggta gaactgttac atattctgga acctcaagcc ctaatttgtg  
219841 attcattttc atacgaccta ctttagtaag atcatatctt tcagggttaa aaaataaatc  
219901 attaacaag gcttttagctg catcttttac aacaggctca cctggacgca ttactttata  
219961 aattctaata gctgccagat cttttcatc atcaatattt tcactttgtt ttaataattt  
220021 taaagtttca ttatcctgtg caaacgagtt aataatagct gcatccactc catttgccaa  
220081 atcgtttagct atttcaaac ttttttgctc ttttaattta gcaagtttgc tttcatcaag  
220141 taaggtttagg gaatcaaata aaacttcgcc actttcttta tcaataatag gatttagccag  
220201 ataacgattt aataaaattt ctactggata ttctatccat tttaaacat ctttaataag  
220261 ctgctcagct ttcttcttag ttagtctttt accagcttga tggataattt ttcctttttc  
220321 atccttgata tcatattcta ttctatccat aaaatcattt ggattaaatt ccgttaagaa  
220381 tttatctttt ttaacatgaa ttgtctgaat aggataaaat aatttaataa tatcttgttt  
220441 tttatacccc aaagctctaa aaagcattgt tactgggtact tttcttcttt tattaatcct  
220501 tacatacaat acatctttgg catcgtattc aaaataaagc caagaaccgc gatcaggaat  
220561 aatttgagca gtgtatacaa gcttattaac aacagtcgag ctttcttctt ctttgaaaat  
220621 tacaccgga cttctatgaa gctgattaac cacaactctt tcaactccat tgataataaa  
220681 agaaactcta tctgtcatca atggaatttc tctgatataa atttcttgtt ctttgatatac  
220741 ttttatacca actttttcac ctgttttctc atctttctca tgtaaagtaa gacggatttt  
220801 catttttaaa tttacagagt aagttaaacc tctttccata cactcacgaa ttgtgtattt  
220861 tggttttcca atttcgtgc taacatactc aagacttaac ctattttgtg gatcatggat  
220921 aggaaagatt gatttaaaaa ctttttctat tccactttca ccgttttcaa gatttaaaaa  
220981 ataatacaaa cttgcttttt gaagttgaag aagatttggga atttctattt gctttgaaat  
221041 attggagaaa tctactctta aacgatttct taattttattg tctaacatat tgcatatacc  
221101 tcgtggtaaa ttttgtaaat ttaaaaaaga agaccttaata tctaggtaaa aaataaaaaa  
221161 gaagacttac taaaaagta aatcttctta aacttttaaa gcttaattac ttaagttcta  
221221 ctttagcacc agcttcttca agttgttttt tagcttcttc tgcatacagct ttagccacgc  
221281 cttcttttaa agttgaaggt gtttgctcta ctgcatcttt tgcttcttta agtccaaggc  
221341 cagttaaagc acgaacgatt ttaattactt cgatcttttt agcaccacca tcaactaaaa  
221401 cgatatcaaa ttcagttttt tcttcagctg cagctgctgc accacctgct gctgcaccac  
221461 ctgctacat tacaggagca gcagacacgc cgaatttttc ttcaaattct tttacaagct  
221521 cagaaagctc aagaacactt aaatttgaaa taaattctaa tacatcttct ttagaaattg  
221581 ccatttttta tcctttatta ttattcagat tcttttttat ttttaagcgc atttaacca  
221641 atagtgaaat tgggtgattgg cgcattccaa acttgcaaaa gcatagcaag caactcgttg  
221701 cgagaaggca ttttcgctaa agctctaacc ttagcaacat ctgcaacttc gccttcaata  
221761 tgggcagttt taatttcgaa tttatcatta ttttcttctga atttagctgc tacttttgaa  
221821 acgctaagtt ggtcctcgcc ccaaagataa atattagtat ctttaagaac cagacctggt  
221881 ttaccggaat tattaagagc aatgctagcc aaagtgtttt taataatttg aacttttaca  
221941 ttgttttctc tcgcattatt tctaagttct tcaagctttt tagtgctcaa gcctttgtaa  
222001 ttacaaacta caatcgcttc gctaatttta aattcttctt gaagtttagc aataatctca

222061 actttttcgc ttctagtcac attttctcct ttccgattga gatttcaagc agagtgggtt  
222121 tacccaaatt aagctttcgc ctgcactatc tccaatctaa aataaacatc tcaaaaaact  
222181 aaaaattcct tcaaatgttt atttaaaaag agttgcatta tagcaactct tacttcatat  
222241 caagtaattc ttgtgtttca agttttacag aaggactcat tgttaaagat aaagccgcac  
222301 ttttaataata tctaccttta gctgctgctg gtttatgttt attaattgct ttaacaaaag  
222361 tagaaatatt atcccaaagt tgctcttttag aaaaacttac ctttccaaga cctgcgtgaa  
222421 tatttccttg tttatctaca cggaaattha cctgtccact tttagcattg ttaactgctt  
222481 gagctacatc catagtaact gttccagtct ttggatttg catcaaact ttaggaccta  
222541 agattctacc tactttacct acaagacca ttaaattagg agttgcgatt aatacatcaa  
222601 aattcatatt gcctttttga atttcttcta tcaaatcatc acttctaca atatctgctc  
222661 cagcattttt tgcttcatct gccttagcat cttttgcaat aacagccaca cgaacttttt  
222721 tacctgttcc cgcaggaagc acaacagaac ctctaaccat ttgatcggca tgtcttggat  
222781 caacattaag ttttaagtgcg atttcaacag tttcatcaaa ttttgctgac tttaaatttc  
222841 ttactgtttc aattgcttca tttaaagcat actctttgct tacatcaatt ttttgtgata  
222901 attcttttaa tcttttagtt attttagcca tatatttctc cgcattttta aagtgtctacc  
222961 gctttttacc ttagcggtaa aaggttttta tctacaatth caacaccat agagcgagct  
223021 gaacctgcaa taattttcgc agcttgatct ctatccttag tattcaaatc tgcaattttt  
223081 ttatcaacaa tttctaaaac ttgggcacga gtttaattac ctactttatt ttttaagtga  
223141 ttgtctgtac ctttagaaat tccagctgct tttttgatta aatctgtagc aggtggttgt  
223201 tttgtaataa aagtaaagct tttatcagca taaacagtaa taacaacagg gatattaat  
223261 cctgccatat cttttgttct ttcattaaaa gctttacaaa attccataat atttacacct  
223321 tgttgacctt aagcagggcc tacaggtggc gatggattag cttttgtagc tgcaatttgc  
223381 aatttaattt cgcctacgac ttttttagcc ataacaaatc tccttacttg atataaaatt  
223441 aaataatttt ctcaacttga gaatacaaga tctctaccgg agtagaacgt ccaaaaatag  
223501 aacattaag ttttagtaat ccgcaacca tatcgtattc ttctactata gcagtaaagt  
223561 ttgcaaatgg accttctgta attcttacct tttcccctt ttcgaaagaa attttaggct  
223621 ttggagcagc acggttatgt acctttcca aaattaaatt aatatctttt tctgtcaaag  
223681 gagtaggttt ttttgattct ccaataaaac gaccaacttt tggaagagat tggatacgat  
223741 gccaaagttc tgtattttaa tcaagatgtg caaaaacata accagaatac aaacttcttt  
223801 cgcttatctt ctcttttcca tttttaaatt caataacatc ttcagttgga acaacaattt  
223861 cttttagttg ctcttcgatt ccattatctt ttactaaatt ttcaatggct cttttaaccg  
223921 ccatttcgct accagcataa gtttggattg cataccattt atgagtactc aaaatttgtt  
223981 ctcttatac aatcgcagaa acaatagagg acataatcca atccactagc gccaaaaaca  
224041 aagaaataac cgtaactact acaaaaactg taatataagc atttcttacc tgttctttta  
224101 aaggaaaaat tactttcctt aattcggcctt ttgataatth aaaataagtt attaattttt  
224161 ccatttattt aaaccttaat catggcaggg caagagggat tcgaaccccc aaccatcgga  
224221 tttggaatcc ggcgctctac cgttggagct attgccctag ggcataagct taacttttta  
224281 gcttaacttc tttgtgaagt gtgtgttttt ttaatcttgg gcaatatttt ttttaattca  
224341 atttttctgt agtatttttg ctatttttat aggtgctata ataatatca ccacattctt  
224401 cacatttcaa accaacttta attctcattt atattttct taaaaaattt aaagccaagt  
224461 actaaacttg gcttttaaaa ttacttaata attttagaaa caacacctga accaacagtt  
224521 ttaccacctt cacggatagc aaaacgagta ctttcttcaa gagctactgg tgcaatcaag  
224581 cttacagtga ttcttacatt ttcacctggc ataaccattt caacgccatc agctaattta  
224641 atagaacctg ttacatctgt tgttcttaca tagaattgtg gtctatagtt attaaagaat  
224701 ggagtatgtc taccacctt atctttattt aagatataaa cttcagcttc gaaatcgta  
224761 tgtggagtaa ttgattttgg ttttagcaaga accataccgc ggataacttc ttctttttt  
224821 gtaccacgaa gaagaacacc aacattatct cctgcttcac cttgatccat ttcttttcta  
224881 aacatttcaa cgccagttac agttgttgtt tgagtatctt taataccaac gatttctata  
224941 gtatcaccaa cttttacaat accttttca attctacctg taacaacggt accacgacct  
225001 gaaattgaga aaacatctt aattggcatt aagaaatctt tttcagtatc acgagttgga  
225061 gttggaatat agctatcaac agcagccata agatccataa ttttcgctga ccattcacca  
225121 tcttgtccag cttttgcttc ttcaagagct tttaaagcag aacctgaaat aataggtgta  
225181 tcatcacctg ggaaatcata agaacttaat aattctctaa tttccatttc aaccaattct  
225241 aaaagttcag catcatcaac catatctgct ttattcataa aaacaacaat atatggaaca

225301 cctacttggc gtgaaagaag aatgtgctct ctagtgtgtg gcataggacc atccgctgca  
225361 gaaacaacaa gaatagcacc gtccatttga gcagcaccgc taatcatgtt tttaacgtag  
225421 tcagcgtgac ctggacaatc aacgtgtgcg tagtggcgat tatctgtttc atattcgata  
225481 tgagaagttg caatagtgat acctctttct ttttcttcag gagcgttatc aatattatca  
225541 taatctttaa gttctgccaa acctcttctt gaaagaacag cagaaatagc agctgtcaaa  
225601 gtagttttac cgtgggtcaac gtgaccgata gtaccaatgt ttacatgtgg cttattacgt  
225661 gaaaattttt ctttagccat tttttcctcc atataaaaat ttaacaaggc aagtctatat  
225721 ttataatttt ttcaatttta tggagctcat agcgggaatt gaaccgcga cctctcctt  
225781 accaaggagg tgctctacct ctgagccata cgagcgtca gaaaaattat ataaaaacat  
225841 agacaactaa aaaataatth taggggattt actgtaagtt agaaaaaat acagctccca  
225901 gtcaaacctt ggagcgggaa acgggactcg aaccgcgac cctcagcttg gaaggctgat  
225961 gctctagcca actgagctac tcccgcaaag catggtggtg agtcgtggat tcgaaccacg  
226021 gaaggcgaag gccagcagat ttacagtctg ccctcgttgg ccacttgagt aactcacat  
226081 aaataaaata ttacatctaa cttttatcgt aatattctgg tcaaacactg ctaaaataat  
226141 ggagctgggt aaggacttg aacccccgac ctgctgctta caaggcagct gctctacca  
226201 ctgagctaaa ccagcaaatt aatttaaaaga cgatattata tcttaaaaaa aatagtttgt  
226261 caagattaag cactataaat tatttaaaaa acattctaata aattaaaatt tctcatcaaa  
226321 aatccaaaaa ctaggatttt cattaaaatt atttatgata atcaataaaa ttaagaaatt  
226381 tcttagctct ttcactttta ggatttttaa aaaagtcatc gggagtattt tcttcaataa  
226441 tttctccatt atccataaag attattctat cagctactgc tcttgcaaat cccatctcgt  
226501 gagtaactat aagcatagtc attccatctt ttgccaat taaaatcact tctaaaacct  
226561 cacgaacgat ttcaggatca agtgctgctg taacctcatc aaaaagcata agctctggat  
226621 tcatacaaaag actacgcact atggctattc tttgtttttg cccccactt agctctcttg  
226681 gataagcatc aattttatgc gccaaacctt ctttttcaag ccaaatttta gcttcttgta  
226741 aaacttctt ttagccctt tttgtactt ttaaaggacc taaaagtatg ttatctttca  
226801 cgcttaaatg ttcaataat tcataggatt gaaataccat gccactttt tgacgcacc  
226861 ttgtccaatc tttaaaatth ttatcgatct tatcttgtcc ttttctata atccatctg  
226921 caatttctc aagtccatta atgcaacgca aaagagtgga tttccacaa ccacttgga  
226981 ctaaaattac caccattct tttgtttta cttctaaatt aatattctt aaagcatgat  
227041 gagagccata atatttttgt aaattttt tctttaaaat actcatttt actccattt  
227101 ttttccaatt ttctagaata taaagtaaca ggatagcaaa ttataaaaaa gataaaaaag  
227161 attaaacat atataataaa tgggtgctaaa tcatttttgt tattaattc tatgatttgc  
227221 tgtcctactt ttacaagctc taccgcaccg attaaataag caaaagtgtg gcttttaatc  
227281 atgctgttta acaattcat actcataggc gttaaacgac gcatagcttg tgggattatg  
227341 acataaaaaat aactttgagt tttattttaa ccaagacttg ctgcactttc gtattggtgc  
227401 ttaggaatgc tttttaaaga agttctcacc aaatccatca tttcaaaact tccccaaata  
227461 ctaaaaacga taatagccga acttacactg cttaaattta tacctaacca tctagaaagt  
227521 ccaaaatata ccataaaaag ccatactaac aacggcataa cacgaacaaa ttccaaagca  
227581 aaacggcata gaatataaac ataacgattt ttaaggctca tcaaaatacc taaaaaagc  
227641 cctccaaaag aagttataat aatgcttacg atagaaatt caagcgtaat atacaaacc  
227701 ttccaaagcc ggcttagggt atctggattt aataaatcaa acatttgaac acctttttt  
227761 caaaaagaac aaaaacaag aataggtag aatgatacac aaataccca aaaacaaag  
227821 caataaaagc tcatctgttt tataagtaag agaattttaa cccttcataa cagtgactaa  
227881 atccggcaaa gctataatac tcacaacaga ggtttcttta ataagaaaaa caatattcgc  
227941 acttattcct ggcaagcaaa ctctaaagc ttgaggtaat ataacataac gcaattatt  
228001 caatttagta aaacctaaag aaagcctgc ttc aaattgc tgctttttaa tagcctcaaa  
228061 accagcccta aaactctctg ccataataaga accaccaag aactaagtc ctacaatagc  
228121 acatgcaaac gctggacgca aagcctcatc tacgcttaag cagatcaaat tcaagggtg  
228181 aatttgttct aatgaatat taaatttagg caaagcataa tataagaaaa aaagctgtat  
228241 taacaaagga gtgttacgag aaaattctat ataaacctg caaaaagctt ccataatcgt  
228301 tattttaaaa taactcatta aaatacaaaa aaagcctata attatagaaa aaataatacc  
228361 aaagaaacta agttttaaag taagccaagc agctgcaacg aaagcattg aattagccag  
228421 tataaaatca aaatccattt tattcctatt accaaagtcc tttttttaa cctctttat  
228481 ctagtatttc aattttacc tttttgtct caattagctc tgaattttta aattctttta

228541 aaattcttga caaagattca gcacgaacgc ttaaattccac tgcgatttgt ctttgcgaaa  
228601 tttgagctaa attcctttca ttttctaaaa gatattcttgc aagtttgcct ttaagatcta  
228661 aagaatthtc taataattht ttttctaaaa ttttaattht ttcaaaaaga gatgaaataa  
228721 gtaagaaatt aaattcttht ttttgagtac acagggtctc aaaatcctca aaatcaatth  
228781 ctaaaatthc acaatattct tcacaaacag catttgctgg atatctcaaa cgcttaaatg  
228841 taggcatttc ggctatgaaa ttgggtgggtg taaaataatg caaagtaatc tccttttcac  
228901 ctgctgtact cttatataca cgcaccctac cttttaaag aataaaaaat tttaatgcct  
228961 tttcgccctc aaaaaataaa atattattht tttcaaattt tcttatttht cctatgcctt  
229021 ttaaaaaatc caaatactct tgcattgtaa tatttaacct atgttaatth tatctcattt  
229081 tgtttgtgct atattaacga taaatthtta tccaaaggca aacataatga aatatgaaac  
229141 cataa caaaa gaaagtatag ctaaacttat ggagcttht tatgacaaaa taagaaaaga  
229201 taaagattta ggacctatth tcaacaacgc cataggaact agtgatgaag catggaaaga  
229261 acataaggca aaaataggaa atthttgggc tggaaatgcta ctaggagagg gtgattatat  
229321 cgggcaacct ctgaaaaaac atcttgactt acctccttht ccacaagaat tttttggaat  
229381 ttggctagga ctttttgaag aaagtttaga taaaatttac aatgaagaaa tgaaaaatgt  
229441 tattttacag cgcgcacaaa tgatagctc gcattttcaa aatatgctth atcgttttgg  
229501 cggacattaa gattatattt tcatcagatc ttttttgcct ttttccaaaa tgtattcatc  
229561 tttggaaaaa tcaaaatatt taaattcgth tccatgctgg ataaatccat caagcaaatc  
229621 tccactcaaa cgattthttaa gatcaagctc tgcgatttht aaacctcta aagtactagc  
229681 aaattcttht aatcgattcg gaatttctth gagttttgta taaagataac aagtgccttht  
229741 aagtccaata cgacctacgc gtccacggag ttgatgcaag gtagcaagac ctaagcgctc  
229801 tgccccacg ataacgatag tgctaagcct tggcaatgaa attcctactt ctacaaccgt  
229861 agtgcttaac aaaatatttc cctcatcgcg aaaccgctcc aaaatttcat ctttttgcct  
229921 gtctttcca tgcgtaacaa aaactthttc ataattatc tcccaatatt tccttgcttg  
229981 ctctaaagaa agataaggaa ttttatcgct tggattgact aaggggtaga tgatgatgat  
230041 ttgatgattt tgcgcaatth cctctthgat ttttccacta agttttgcaa aaccctcatt  
230101 ttgtatacaa agagtggtaa tatccttht aaaaggcatt tccttgataa aactaaaatt  
230161 taaaagctct gattgtatca tgcttaaagt tcttggaatg ggcgttgcgg aaaattgtat  
230221 aaaatgtggg gctaattcat cttcatttht agagtaaatt tgctgacgct gcgcagaacc  
230281 gaagcgatgt tgctcatcta tcattacaag cacggcatta tgactttgaa ggtgaatgag  
230341 tgcattgatt cctataatca aattggtht tttgatttht tcttccaaat ctttttctth  
230401 tttgccccct ttgataaata aaatatccat aaattcaggt aaaagtttht ttgcctcttc  
230461 ataaagctga tgggcaagta tgctagtagg agccattaag atagcttht ttggatacac  
230521 cattaaagca gcacctagca aaaccaaagt cttaccacag cccacatctc ccataatcac  
230581 tctctthtta gcctctthtag agctthaaatc ttgctctata tcctthaaag catttaattg  
230641 atcgcgagtg ggcgaaaaag gtaaatttht tagccaattg gctatattaa aaatttcaat  
230701 ttcataagct ttaaaatggt ttttttagc ttttaagcgt tttaaaaaat tataaatttc  
230761 aatataattht aaatctthct caaaacgctc caaattctca aacattaaaa aactthttht  
230821 atcataagca tgcaaattta aaagaaaatg gatgtattta tcttcaatc cgctthctth  
230881 taaatthtta taattaagat attgggtgat aaattcagaa atthtthtatt cttgtaagcc  
230941 ttgaatttga tattthggag caaagcctgc aaaagaagct aaaatthttag gattattaaa  
231001 ctgccaataa tgaccaaac gcgtaagtht tgcattgtaa ataagctctt tgcctattht  
231061 gcaactcca aagtgcgaag ccctaggatg aaaaaacaca aaagaaatgt cttgattcca  
231121 ttccttgcaa aatcccaaac caaaaagctg gcctthttht gaatgaatgc ttttaatgat  
231181 tattthttga gtacacagct cattthcttht cggcatttht ctaggactca aattthctgat  
231241 tttthtaggt aagataagtg ctaaactgat cgcgcttht atthtthtatt ttttaaaaaa  
231301 atcaaaatca tttctthttaa tttctattht caatacttgc aaaatthttaa tctaaaatth  
231361 cattatgctt tcgtatgtaa gcattthact cttgaagtht tactthttht atgagcttht  
231421 attctthctth ataatactct tttggcaatc cctgataata ctcgtthaaag cttatcgaca  
231481 aacgcctact aagactthta taacgcaaag gagttgaacc tatgagaaaa tttthtagctt  
231541 gtacaagctc atthtthgact actcctthct ttacaaaatc tthaaatact tctthtaacta  
231601 tctthttagc ttctthtagc cttctattht tagtttgcaa atagccaaaa actctagtaa  
231661 aagatgcatt catatcaagc atagcataag cagaatacgc aagccctctt ttaacacgaa  
231721 tttctthctat tatcctthgat ccaaaaccgc cttgacctaa aataaatagt gcgatttht

231781 caagataaaa atccttatca ttaaattttg taaaaaaggg tgcagcaaag taaatatagg  
231841 cttgttcgct ttcttttctg atttggatta tgtctttatt ttttgagtta atttcataag  
231901 tttttgtga attttgactg ctttttgaa gttttgctaa taatttatct aataagcctt  
231961 tagccttttc ttgagctaaa tttccaccta aaatcactac aagattgctt aaattaatat  
232021 ttttcttata aaaactttcc aagtcgctta aagaaatttg cttgatagtt ttttcatcac  
232081 catcatttgg actttgaaat tctttgcatt caaaaatttc gctattaagc aaattttttg  
232141 ctaaataatc aaaatcacta tttttactag caagctcacc tagggcatta atttttagtt  
232201 tttctaaaat tttttcttca aatctaggat ttaaaagtaa attttctaag tgttttaaag  
232261 caaattcaaa attttcttcc aagcaagaaa gattgatttc caaactttca aaaccactac  
232321 ttgcttccaa atttacagct ttaaattcca attctttaa aaagttatcg tctacacct  
232381 cgtttaaaat tcttgcaaac atctttgcaa gtcttgctat ctcatacataa cttcttccac  
232441 agtttctaaa aacaagcttt aaaataacaa taggaaaatc attattttcc tcaaaaataa  
232501 aaggaatttt tatctcatta acttctaaat tctgcattaa aacctttcta aaatttcata  
232561 agctgtattg cgcttagcgg gattttcgcc taaactttta atcaatctta tcatctcatc  
232621 ttgattcatt ctataactcg caccgcgagc gcttacaaca ttttctcca tcatagttga  
232681 acctaaatca ttggcccaa attttaaacg aagttgcca atcaatgaac cttgtgttac  
232741 ccaagaactt tgcaaatttt taaaattatc caataaaagt ctagctaaag ctaagagtct  
232801 taaatatattg tttgaacttt gcttcataat ttcaggatgt ttttgagta atgctgtatt  
232861 ttcgctttga aagctccata agatgaaggc ctaaaacct cctgtttcat cttgtaattt  
232921 tcttaaatgt tcaaaatgat cgacaatctc ctcactactt tcaaccgttc caaacatcat  
232981 agtagcagta cttttcatal caatttcatg agctcttcta tgcacttcta accaagtagc  
233041 agtatcgcatt ttattgggcg caataatatc tcgactcta tcacttaata cctcagcacc  
233101 cgctccaggt attgaaaaca aacctttagc ttgaagtctt tgtaaaactt cagaaattga  
233161 aattttagaa gccttagcaa tataagcaat ctcaactgca gaaaagccat gcacggtaat  
233221 atttggataa tgctctttta tccatgaaac aagctcttca taccattcta ttttagttt  
233281 aggatgcacc ccaccttgaa aaagaatttg tgcctctcg atagcttca gctcttcaat  
233341 tttttaccg atttcttcaa agcttaaaat ataagcatca tcttctttat gatggcgata  
233401 aaaagcacia aaagaacaat ctatacaaca aacattagta taatttatat ttctatccac  
233461 aacaaaggta gtgatttttt caggatgaag ttctaatttt ctttggtgag ccatttctcc  
233521 aagctctact aaatttgcatt tccttaacaa ataaagagct tcttctttat ctaatctttt  
233581 caagttattt ctttaaaatc ctttttagc tttattatag cttttaaaaa cataaattat  
233641 gctatagttt cgcttatgaa ttatattgac ttattgaaaa ataataaaaa tattagaata  
233701 ctaaccttag tgcaatttat cgtatatttt ggtgcgtggt tttcccaaac aggtgttttt  
233761 actcttttag taagccttaa cgctccact tgggcaacag ctacaagcgc tatgcttgct  
233821 tttttaccg gggttttgct tgctcctatt aatggagtta tagtagaaaa aaataagcct  
233881 aaaaagcttt tattgagtat gattagcata gagcttgttt ccatttctcg tcttatcttt  
233941 gtaacaagtc ttagtatgct ttggctttta tttattttta tttttgtag actttgcgtg  
234001 gcttcgattt atttccaagc tgaatgagt ttgctagcta aaattttaaa tccagaagaa  
234061 ctcaaacttg ccaatgaaat gcatagtgtt atttgggcag tttcttatac agcaagtatg  
234121 gcaagtgcag gaatttttat caattttttt ggtataaaaag cagcattttt gtttgattgt  
234181 tgccttataa ttattggaat tttactttta actagacttc atattcctca ttttaacaa  
234241 aaaattcaaa ataaattttt cactttgatt aaagaaggtt ttttatatgt tttgcaaac  
234301 aaaatcatcc ttcatcttat catattgcat gcttttatag gatttactgc ttatgaaaca  
234361 ctcgtaactt tattagctca acacgaatat aaagaagttt tatctgctgc tttagttata  
234421 ggatttttaa atgctataag agcttttagct ctagcctttg gtcctctttt tctaagtaga  
234481 attacaacaa ataaaaatat attttttcta tatctaggctc aaggtttggg aattatactt  
234541 tgggctttta ctcaagttta tttttatatt tcatttatag gtcttattgc tgcgggattt  
234601 tgcacctcat ctctttgggc ttatacttat acaatgattc agaaaaactg cgataaagct  
234661 tactatggaa gagtgattgc ttatacagat atggtttatc ttagcttttag tgctcttatt  
234721 tctcaactca tgggtttatt attcgaacaa ggtcttaaac tcgctacgat tacagctttg  
234781 cttggaatga tttttatatt tgcagctttt tattggaaat ggtttgataa gaaatatttg  
234841 tgaattttat aaattcacia attaaaagat taaattttta ataaatcttg caagtttttt  
234901 agagcttctt cattgcttag agtattgttt gtggtatgag tattaacctc attagttcg  
234961 atttcataac cgctaagcat acccgcaaga cgaatattaa taccactttt tccaatagct

235021 ttgctttttt gctcgtggtt taaagttaca attgcttttt ctttttcaat ctttacagaa  
235081 ctactatag caggggctaa ggctcttgca attaaaattt caggctcatt gctaaattca  
235141 atacaatcta ttttttcatt gtgtaattct ttgcttactg cattgatcct aaccctttt  
235201 acacctacag tagctcccac aggatcaata tttgctccat ttgcttgaag tataattttt  
235261 gctctttctc caggaattct agcacattta actacgctta catatccgtc ttttaattca  
235321 ggcacctccg cttcaagcaa gcattctaga aatttagggc tcgtgcgact tagctccatt  
235381 ttaatgccct tatctgtata aacgcgacgt atcacagcct taacaacatc gccacttta  
235441 aatttttcac ccttaatgcg atttttcctt ggcaaaaaag ctcttagctc atctatctct  
235501 atataagtat tttcttcatt atcaattcgc acaacatttc caaaaacat ttggccgact  
235561 ttatttttat atttttcaaa aatagtttgc tcaagcagct tttgtatgtg gtatttctaat  
235621 tctttgtgta aatattttac agctgttctt cctaaatttt ctaaagagca ttcataggtg  
235681 agctcatcac cgatttcaac atcaggtgct tcttttttgg ctttgctaaa ttcaatgtag  
235741 ctttctttat tttcattcaa tctctcatca ttgtcagcca caactgtaat tttttgataa  
235801 agatttaaatt tttttctatc tacaaaaaag tcatattctt gcccataaatt tctttttgct  
235861 gtatttatca aagctgtaat aactttttct tttacgcttt ctatatccaa atttttctca  
235921 ttcgcaatgc tttctataat gtctgcgatt ttttcataa ttatcgatac cttttctttt  
235981 gggatttttt taagaaagta gattaaaagt atatctttaa taagtttaat taaaagtaaa  
236041 atttgataaa attatagatt taaaagacgc taaggataca attatggatt taaaattggc  
236101 aagaaattta atcaatgaag agcctaaaaa tattagtcta gctaaaattg aagaggctgt  
236161 aatcaagaa ggacaaaagt ttttttattt tgataaagaa aattcacaca aagatcttat  
236221 tgccttggtt gagcactttg aaaaaaaagg cttaaagtgtt tatcatagaa ctatcagata  
236281 tggtttagat agtaatgatt ttatgtatga ggttcacatt ctttgagctc gaaaaaactt  
236341 tttattcaaa ctttaggctg tgcaatgaat gtcagagatt ctgaacatat gatagcagaa  
236401 ctgacacaaa aggataatta tactttaaca gaagatatca aagaagcaga tttgatactt  
236461 atcaatacct gctctgtgcg tgaaaaacct gtacataagc ttttttcaga agtaggtgga  
236521 tttgaaaagg ttaaaaaatc ggggtcaaaa ataggagttt gtggttgcac agcttcgcat  
236581 ttaggaagtg aatctttcg tcgtgccctt tatgtggatt ttgtattagg agctaggaat  
236641 atttctaaaa ttaccgaagc tgttaacact cctaaattta tgagcgttga tatagattat  
236701 gatgagagtg aatttgcttt tgggtgatttt agaaatagca tttacaaatc atatattaat  
236761 atctctatag gttgtgataa acattgtact tattgtatag ttccgcacac aagaggagat  
236821 gaaatttcta tccctttaaa tattatctac aaagaagcac aaaaagcagt agacaaaggc  
236881 gctaaggaaa ttttctact aggacaaaat gtttaataatt acggcaaaag atttagaat  
236941 gaacataaaa aatggattt ttcatgactt ttagaagaac ttagcaccat agaaggttta  
237001 gagcgtatcc gcttcacaag tcctcatcct ctacatatgg atgataaatt tttagaagta  
237061 tttgccaaaa atccaaaagt ttgtaaatca atgcatatgc ctttacaag cggctcaagt  
237121 caaattttaa agtctatgaa gcgtggctac actaaagagt ggtatctaga tagggcatta  
237181 aagttaagag aactttgccc aaatgtttagc atatcaacag atattattgt tgcatttcca  
237241 ggagaaaagc ataaagattt tgaagaaact atggaggttt tagaaaaagt acgctttgaa  
237301 caaatgtttt cttttaaata ctccaagcgt ctttaacca aagctgctac tatgccaaat  
237361 caaatcgatg aagcaatagc ttcaagtcca cttagtactc tacaagctcg tcataatgaa  
237421 attttagacg atattgtcaa aaaacaagaa aataaaactt ttaaagttct ttttgaagaa  
237481 ttaagagcgg gcaatgctat tgcgggtaga acagataaca attttttggg gcaagttgaa  
237541 ggcagtgaag aactcttagg aacttttaaa gaagtaaaaa ttactaatgc aaagcgtatg  
237601 gttttatatg gggaaatcat ttaaaatagc ttttatagca cgcttagttt tcattctaca  
237661 atggctgatt tttattactt gtaaaaaaac ttataaaggc gataaagttg atcaggattc  
237721 ttatgtgata cttttttggc atgggcgtct tgcccttatg ctttttgctt ttaggcattt  
237781 tggtaaaaaa ggaaaaaaag cttatgttat gatctctcat catagagatg gagagcaaat  
237841 tgctagaatt attaaattat ttggactaga tacagtgcga ggaagtactt caaagggagc  
237901 cagcacagct cttcgaagtg cttttaaatt tctagacgaa aatcacgatg tagtcatcac  
237961 tcctgatgga ccacgcggac cttatcatag tatttcagat ggagcagtat tgcttgcgca  
238021 gaaaaaaaat gttaaaaata gaattttaaa ctatgaggcg agaaattttt gggaaattta  
238081 aagttgggat aaaaatgattt tgcctaagcc ttttactcat ttagtctata ggcttagcga  
238141 gcccttggat atttcaagtt tagataaaga tcaagctaaa ttttttttac ttgaacattt  
238201 taaaaatatt gaacaaatgg ataaatttta aggaataaaa tgttattttt acttaaaaaa

238261 atattaccac aactttttcac aagtattatt ttagaagaca aaaaaaacat ccttaaaact  
238321 tctatatata aaaacaaaa acttataagt agcaatgaaa aaactttcga caaaagtgaa  
238381 aaattattag aatatgtaaa aacactcaat agcaaatttt tattttacca tacagcatta  
238441 tttttaaatg ttaaagagca aggtttgatt cctagtaaaa atgataagga ttttgaacga  
238501 tttaatgtag gcaaaatgag cttaaaatcc gtcacattaa ataatgcttt aatatacaca  
238561 gcgacagaac acatagaata ttttaatgaa ttttttgagg attatgggtgg tttggatttt  
238621 ttatattctc cttttgctat actttatcat aatattttta aagaaaaacc aagtaatgac  
238681 aaaataactc tttatgctta tagacatgag tacattttta cccttataat ttgccgaggt  
238741 gttgaaattt tatatggaga tatcattttc tttgaagaag aattgggctt agaaattgaa  
238801 aatcaagaag agaatttaga tagcctaggc aaagatata taagcgatac tgaagtaacg  
238861 cttgataatt ttaatgaaac tctagaagat aagctcaacg ctcttgatca atttgggtgat  
238921 aatgatctag aacataacga agacgattca gagttcttag atggtaagga taaactcgat  
238981 cttgaagaga tgaatcaatt tggcaacgac atggagcttt gtcgccatat agtcatgagt  
239041 attgaaaaat tttacaagga tgaaaaatat cagagtgttt ttattgataa tattttttatc  
239101 cttagcacia aagaactcga tcaaagcgct attgaatttt tggagaaga aactttatta  
239161 gaaattcaaa ccaaacaaat caatacttta gattcaatta cagaactcat gcaaaaaggag  
239221 cttcagtgac aacctatagc ttcataaagc ctagaaaaaa gcctatcttt acactctttg  
239281 ataaaatatg gctgggactt tttagttttg gtatattttt tatattttgca atatattttt  
239341 tataccttac caagattgca ttaacacata atctaataga agaacaaaaa gaacaagttt  
239401 tacaatttca aaataaaaaca caagaaaatg gacaattata taatattctc ttagaacaaa  
239461 gtgaaattgc aaataccttt tatacccaaa accaagcttt taaaaatagc ttaaaaaatc  
239521 tttttgacat aatagtcaag accgatggaa tcaactctga aagcgtagag caagaaaaaa  
239581 attctcttaa gcttataggg gttacaccta caaaagaaat gtttgcttta cttttagaaa  
239641 ctccattgaa agtatttttt gatcagagtt ttacaactta ttatcgctta aacaatgggt  
239701 ggtatcgctt cattagtata agtaaacaaa attcaggagt tttacaatga aagataaaag  
239761 tcttgaagaa ttaaataattt taaagattat tgtttatggt ttaagcttta tcaactgtatg  
239821 tactgctttg attttatttt tattattgcc tgtgctaaaa gattacaagc aaacccttt  
239881 aagaaaaaat tcacaagcag ctatatttaa tgcagcgaag gctaagttag atgccagtga  
239941 aaataaatta atcacactaa gaacagaaaa caataaaagc ttagaacaat ttgaacaaca  
240001 attcaatcta gcacatcttc aaaatttttt agaaaaatac tttgaaagta tacagataac  
240061 agagcttgaa ttagataaaa aagaaaaata tcttaccat agaatacaaca ttcgagcatt  
240121 gataaataat cctagacgct tatatgactt ttagatgcc tttagctcaat ataacaatct  
240181 tataaagatt gattatccca tgaccttaa ggctagtgat catgggataa tgataaatct  
240241 taatgtgcaa atttactcaa actaaactta cattctcgcc ttttaaaacc tgattcattg  
240301 tattcatagc acacattttt ccacacatag agcaagaatt taaatcatca gggcgctctt  
240361 cgtaaakat ttttttagct ttttcgccat caatagcaag tttaaacatt ttctcccagt  
240421 caatatcttg tcttgctta ctcatctcat catctctttt tctttctttt ggaagtttag  
240481 ctaaatccc tgcatgagct gcaatcttag tagctactat accatctcta acatcattta  
240541 aattaggcaa tcttaaatgc tcagcaggag ttacataaca aagtatatca gcaccgcag  
240601 cagcagccac agcaccaccg atagctccgc ttatatgatc atatccagca ccaatatccg  
240661 taaccaaagg ccctagaaca taaaaggag cacctttgca aatgcgtttt tcaatttgca  
240721 tattggcttc aatctcatta attgccatat gccagggtc ttctatcatc acttgaacac  
240781 ctgcttcca tgctctttga gtgagtaaag ataattcgat aagttcagaa atttgcgctg  
240841 catcacttgc atcatgtgta gatcctggac gcaaagcatc gcctaaagat agggtcacat  
240901 cgtattttta acaaatctca agcaaatcat catagtattc aaaaaagga ttttcagctt  
240961 ctttcatagc catccacgca taaagcaccg atcctcctct agaaactata ttagtaagtc  
241021 ttttactttc tttaaaaact ctagccgcac gcgaatttat acccgcatgt atagtataa  
241081 aatcaactcc gctttttgca tgatgataaa ccacatctaa aaaatcccta gcgctgattt  
241141 gttttagatc tttttctaaa aatcctaccg catcataaac tggaaactgtt cctatcatgg  
241201 cttttgaaac tgcgataagc tcttctctaa agcgacttgt tttgccataa ttacttfaat  
241261 ccataatagc ttcaattcca aatttgtgag caagctctac tttttctatc tctcactat  
241321 aatcaacaca atcatttgaa acacctaaat tcacattcac tttagtacga agtccaagtc  
241381 ctatgccatt tggatcaaga cttttatgat tgatattcgc cggaatgata atcttaccac  
241441 aagctatatt ttcaagcaaa aaatctttgc ttacttcttc tttttgagca acaatctcca



241501 tttctttggt aaaaatacct tcttttagcat aaagcatttg agttttcata tttatccttt  
241561 aaaaaatttg gataaatgag ggtgcaagta aattgtagaa agtataaatc ttcccgcgc  
241621 tagcattatc tagttccggt tcggtctaag cttttagctt actctcagcc tgtatcacia  
241681 gctcccgtca tttatgtttt aattatactc tttaaatatt ttatTTTTgc tttatacgag  
241741 aagtcttagt aaaatttata agttcttcag tggTTTTgat atgataagga agtttgccaa  
241801 ggcaatgttt aaaaatttca gccgcagcca aagcatcatt taaagctctg tgatgagcat  
241861 tttttatccc taaaagtctt tttaaaacat ctagtTTTata tcttgggctt tctatacagc  
241921 attgCGcaaa ttctatagtG cagatacgac gattaagcaa aattccaaaa ccgcattcat  
241981 ttaaggcctt ggaaataaaa ccataatcaa aacgcacatt atgtgCGagc aaaatactat  
242041 cttttaaaaa agtctaaaa tcatttaaaa ctttagtcaa actaggcgca tctttgacca  
242101 tatctaaatt aattcctgta agttctgtaa tattttcagg aatttctttt acctgcacca  
242161 aggagctaaa acgatcaatt tcttgcaaat tttttatctt aactgccctt atttctaaaa  
242221 tttgtccggt tttaatccca cctgtacttt ctatatctac aatacaaaaa atttcttctt  
242281 taatcttttt tgtacgcggt tgtaaggtaa aaatattatt tttatctaaa gttaaaccca  
242341 aacccaaaag ctcaaaagtT tccaaatcaa gctcataatc ttttaattct tcaatcttct  
242401 taaattcctt gattaccac tcatagggtt tactttgctt acttaaaaca gaaataatct  
242461 gatcaatttg ctgcaaacTc aaaattcaag ctttaaatgat gaaattgaag ttttataatc  
242521 atttgaagaa aaaatataac ttccagcgac taaaatatct gcaccgCGgg cttctaaatc  
242581 gcttgcaattt aaaccattga ttccgccatc aacctctata aaaaccttag catttctttc  
242641 atcgatcagt cttcttaatt ctttgatttt atcatatact aaaggtaaaa atttttgtcc  
242701 gccaaagcca ggattaacac tcattaaaag caccatatct acaaagtcta tcatatgttt  
242761 tatagaattt ataggggtat gtggatttaa aacaatagca gggTgaattc cttgacttct  
242821 tatatactcg caaagcctta taggatgagg ctCGctttct atatgaaaag aaataaattt  
242881 aggtttgata ggggtaaaaa gatctacaaa tttacctaca tcttttacca tcaaatgaac  
242941 atctaaagga attgaagtaa tagttgaaat tttttctatc acacagggtc caaaggTtaa  
243001 atttggaaca aatgtccat ccataacatc aatatgcaaa agatcagctc ccgcctcatc  
243061 gattgcttta atctcttctt ctagtTTTaa aaaattggcc gataataaac tCGgagctac  
243121 atacataaaa ttagcctcat aaagtaaaaa attttaaaga aaaacatttt atctatttat  
243181 aaattaaaaa tagtataaat atttgaatat ttttaagctta aatttgatag aatcttgatt  
243241 taaaatttcc aaaggatgca aatatggcaa gaatatgtca aatcacaggt aagggaccaa  
243301 tggTgggtaa taatgtcagc catgctaaca ataaaaaaa aagacgcttt ttacctaatc  
243361 ttagaacagt tcgCGtaacc ctagaagatg gtactacaag aaaaatgaga attgctgctt  
243421 ctactttaag aactttaaaa aaacaaaact ctaataaac tcttgaggat tcgtcctcaa  
243481 tgaccttaaa attcttcaat tatcattacc ttatttaata aattgctaatt ttgtaacata  
243541 tttaaagattt attgaattgt tcagtatttt ttaagccaaa aatatcattt aattagctat  
243601 aatgtaacat atcatttaat attttttaaa ttttatcaat ttttaaggag aattttatgc  
243661 tacatgaata tcgCGaactt atgtcagagt taaaaggaaa agatgCGcat tttgataagt  
243721 tatttgagcg ccataatgaa cttgacgatc aaattaaaga cgcagaagaa ggaagagccc  
243781 tattaagtga tattgaaatt tcaaatctta aaaaagaaaa attacatatt aaagatgagt  
243841 tgaaccaata tctatcaaac tacaaaaaat agggTacaaa tatgtttgga agtaaaataa  
243901 atcatacaga acttcaaaat atcaaaaatg aaaacaaaa tcttgctcat cagcttgaga  
243961 aatcaaggc tgaaaattta gagttaaaag ataaaatttc aaccttagag caagaagctt  
244021 tagagtcaaa attaaaaacc gatcttttaa atgtattatt aggcggTggt ttgaaaaata  
244081 ttaccatagt tcaaagcgat atgcttgaaa atgttaataa agctgaaatt atttctaatt  
244141 attctaaaac ttcactagca gaaatggatg aattaaatca tatagctaatt tctataaatg  
244201 cttctttaag cgatattaca gaatcagcta ataaaacacg cgatgttgca ggaaccttac  
244261 atcgtagtgt tgatgagatt actaatgtaa tcaatcttat caaagatgta tccgatcaaa  
244321 ccaatcttct agcattaaat gctgccatag aagctgctag agcaggagaa catggtagag  
244381 gttttgctgt tgtggcgagt gaagttagaa aattagctga aaaaactcaa aaagctacaa  
244441 cagaagtgga aatgaatctc aatcttctaa aacaaaatgc aatgaaatg tatactcaaa  
244501 gtgagcaagt ggaaaaaatt tctattaatt ctaatgcaca tattatgagt ttttcagaaa  
244561 aatttaccCa cttagtcaat gaagcacact ctacaaattc aatgCCgta ggcattgctt  
244621 cagaagcatt tgtatctttg gcaaagcttg atcatatagc atttaaactc aatggatata  
244681 aagaaatttt tgcaaaatct ggacaagaat tagccgatca tacaagttgt cgtttaggca

244741 aatgggtagc aagtactgga aaagaaagat ttggaacag caaaagcttt acaaaaatca  
244801 atgagccaca tcaaaaagta catgaaaata tgaatagtgc tatccgtatc gcgagtacag  
244861 aagatgcaag cttaggcaat actcaagatg taattatcaa aaaatgtgaa aatgctgaaa  
244921 atgcatcttt acatttattt gatgtattta aagaaatgct taatgaaaca aattaatcaa  
244981 attctttgcc ttatttaagg caaagctctt tcttttcttt taaaaaccac aaataagcaa  
245041 aatcaagcaa ggggtgatgg attatctttt tagaaaattc ttcatactcg ttaatcttta  
245101 caaaaacagc ctctatttgc tcatcctcaa cgccacctcc ttcacaaacc ttatcattct  
245161 catctacaat tgcaaaaata aaactttgtc tgctagctcc tgaaccaaag cctgtataaa  
245221 aatcaccacac tttttcaaat tctttaggag cataacctac ttcttcgata cattcttctt  
245281 tagctatttg ttccaagggt aaatctttat ccacaagtcc tgaacaaagt tctatgggat  
245341 agcccatatt ttcatctttt tgatagtttt tatcttgctt ttggtgatac caaagcggta  
245401 tgcgaaattg acgaacgaaa ataaagcttt tcaattcttt atgggtataaa agaattgaaa  
245461 cgctatcttt ggattctata aaatcccaag tgcaaagctt gccattactt tcatagctaa  
245521 atcttttagg tttgatatac ttagactcac aaaaaggaag ctcttttaaa tttttaaata  
245581 tcataaaaca aagcctttat tttttcttca ttatactttg tttttacttg ttttaagtta  
245641 agatgctctc ctttttttca ttttaaaaaat catatttgta acttaaccaa aaacttcttc  
245701 cttctgtata atcttgatag cgatttgcac aacctcctgg attagcacta gtatcccatc  
245761 ttgtaacttg tggatcaaag aaatctttgt cgaaaagatt ttgtactgta aaacttaaac  
245821 ttgattgttt atcgatttta taatttactc ccaaatccac tatataaaaa ggcttatatt  
245881 tttgccatgg taaaattcca ctaccgccac cttttgatct ggctatagta tcaagtcttg  
245941 cacgtgcttt aacataagag ctgaatttac cttgctcgta atttaatttt agcatagcaa  
246001 tatgtcttgg caaattttct attctatctc caccaaacca atttgtctgt ccatccttat  
246061 aacgattatc catgaaagta taacttgaat tgacactaaa accattataa ggttttgat  
246121 tgaaagcaaa ttcaacacc ttggtttgcg ttttgccaag attgatagaa cgctcacatg  
246181 taacaccatt ggtacaatca atatcatttt gcattcctgt taattcttca ctactgattt  
246241 gatttttaaa atcagtaata aatcctgtaa tagaataatg agcaaaatca aatatacctaa  
246301 aatcaactcc caactcataa tttgtacttt cttcagggtt taaatcagga tttccaaaag  
246361 aagcactgtc attgctataa ttataataac cattagtaag ttgttttgct gctggagttt  
246421 tatagcccat agctacacct ctttaaaaag caacattatc atttaaatga taaacaagat  
246481 atactctagg agttagtcca gaatcaaca aatcgctata aatataacgc aagcctgtag  
246541 taaaaatcaa atcatcgcta ataaaatatt caccctcacc ataaagcgca accgtagttt  
246601 gatcaagatt tttaccctt acttactac ctgcactttc ttgatcgttt ttaagcgtct  
246661 catagtctat tcttgttcca aaagtgctta ccaaatttcc atatttatcc aaattccaag  
246721 gcaagacaac ctttccttcc cctaccaaa tttgactatg taattcttta tctttgggtgc  
246781 tgccatactg taaatacgca ttacttgttc caaattcata atttccatca tgatttaaaa  
246841 caacattatc tttaaacagc tgcctttcgc ttttgatagc cctaccgctt gtagaattta  
246901 ctgaaatttc attgacataa cgctcaacat ctaaataaac attattacta tcatttacag  
246961 tccaattcag tcttgatcca aaacccaac tcgtaaaata tccaggacta tgacttgcgga  
247021 tttgataatt ttcaggctct tgagtaccac cattccaaac cggcgtaggc cattttaaat  
247081 cagaagctgc cttatcataa tacttaatcc tagcagaaat tgaagcgtga tcttcaatca  
247141 aaggtgtagc cacataagca ttaaaaccac ccgcatctc atatttatta gaatgctgct  
247201 gtaaaagggt gttaaattct atactcgctt cggttttatt aggatttttt ttagtaatga  
247261 tatttattac cccgcctacc gcatcactac cataaagcgt agaagcaggt ccgcgtatca  
247321 cttcaatacg ctctatcata gatgcgggag gtaaatatcc tgattcgcta ccaactaaac  
247381 cattatcata aaaaccatta gcaacgcttt gacgctttcc atcaatcaaa accaaagtat  
247441 aagaactccc aaaacctcgt atgctaaaat cataagtacc ggtttttattc atagtaacat  
247501 caacacctgg aatatctgaa attgcctctc ctatatcctt aatgggtttt ttaactaagtt  
247561 cttccttggg aataacagaa atactagcag gcgcatccac taagtcttgc tcaaaaccac  
247621 ttgcgctcac taccacatca tcaagttggg attgttcttc tgctttaatt tcacctaatac  
247681 ctatcaaaaa aaaacacaaa atgcttaatt taagcttttt agcattcatc gtcctttttc  
247741 ctttcttggta ttaggctatt atgatagtta aaatcaattt tgaagtatag ataaaaatga  
247801 ctttaaatc acttaacttt gataataatt ataaaaaaa ttttaaagct taaaatttgc  
247861 acaaaacata gctttttaga aatattataa gttattttta aagacaagta agaggataaa  
247921 aatatcttaa aaaaaagtat tatatttata cacaaataat ttattcaaat ctccttatgg

247981 gagat ttgctatcta acagaat ttctgctttc ttaataacgg gtagatccac  
248041 catcattcca ttatgattaa aatgatatac attgctgttt tttctaagcg ataaaat ttc  
248101 ttttgcccat gcaat ttgctgatgg gctaaaaacc tcattgattg gtacaacttg  
248161 atttgatga atacacaaag atcctccaaa gccattgat tttgcaata gcaaatcttc  
248221 ttttaatcca tcaatatttt ttatatcagg ataaactcca ttgattggcg ataaaagatt  
248281 gtattttacg ctttttagaa caatctgcgt tctaagtctg tttaaaataa aattcttccc  
248341 ctccccctct tgcaaattta aatccaaagt catatctaaa cttccaaaac ttaacgctaa  
248401 aacactcgga tgcttagcaa tatcatctaa attttccact cccaatgcac tttcgatgat  
248461 aggtattata ggaagttcaa atttgctaag tatactata tcctcataat tttgctcctt  
248521 tggcaataca atgccaacaa tactattaga ttctttaata gttgaaatta aggacaaatc  
248581 tttttgaaat tccgcgcttt gtgtttcatt aatccttata agaaat tttt  
248641 agcacattga cttgaaaaat ctgcaatatt ttttcttcca acttcttttt ttgcctcttc  
248701 aacagaatct tccaaatcaa taataat tttagcaccg ctttgtaagg cttttataaa  
248761 cttttctgga taaattgat gaacaaataa aaaactttta gctttcatag aaaaatcctt  
248821 aaataatctt tttttctttg aacaaattta tcttatcaga aaaaccaaat tctctaagaa  
248881 ttgattctgt gtgttctcca agggctggaa tttgtccat tctagcctca taattgttat  
248941 ttgttgccgg cggtaaaagt gcaggatct tccaacctc gctatcaact tccctcaac  
249001 gatttctagc ttttagctgt ggatgttccc atacttgatt gagttcgttg acatttccat  
249061 ttgcgatttt tgcttcatca agacgattta taacttcttt tgcgctaagg ttttaaaag  
249121 cgtcttcgat ttttctttt acttttgatg ctttttggt tcttaaggta ttgtttttaa  
249181 aatcttcgtg atcaattaat gattcatctt gcaatacaat tttacaaaag ctttccatt  
249241 ctcttgatt ttgcaagcca aacattacaa ctccatcttt tgccttgtaa ggaccatag  
249301 gagtaatact tgcatgaaat gcaccttttc tctctggagg agtcgattt ttataggtgt  
249361 aataaagagg ataattcat cattcagcca tacattctag catagaaatt tctaccctag  
249421 aaccctttcc agttttttct aagtataata atgcctgcaa aataccgcta taagcataca  
249481 ttctgcgga aatatctgcg atactgattg gaacttttac acattcatct tgcgtaccg  
249541 ttatggaaac taagccactt tctgattgta ttaaagatc atatgctttt ttatgtccat  
249601 aatttccacc ttcacatat ccagaaatat cgcaaactat aatctttggg ttgtat tttt  
249661 ttagat ttttccaat cccaatcttt tagatgcacc aaatgctaaa ttttgcacaa  
249721 aaatatccac ttttggtaaa atcgtcttga taaattcaag cgcgtcagga tcttttaaat  
249781 caatagccaa actttcctta ctgcgattta cccagacaaa atgactagct ataccatcta  
249841 ctcttttatc atatcctctt gccaaatctc ccacttcagg tctttctatt ttaataactc  
249901 tagcccctaa atccgccaat tgtcttgtag aaaaagggtgc tgctattgct tgttctatac  
249961 ttaaaaccag ttttcttctt aaaggtaaca tctcttctc tttttattta aatgaatag  
250021 tgccagaatg cgctacaaat ccatttttat ttatccatac ttcagcagta tttttatcag  
250081 taatttttga ctccacagca aaactatcag gaacacaaag tgcattgata cctctataac  
250141 tataattaac aatttgttta tcgggatgat tttttacaaa gcaattaatc atataagttg  
250201 ccaataaagg accatgtata actaaacct gataacctc aacttgcgtt gcataaggaa  
250261 aatcatagtg gatcttatgg cattaaagg ttaaagcaga atagcgaac aaaagcgtgg  
250321 aatcaggttg cttttttca gaataatctg cattcatagc aactacatcg ctgtaagct  
250381 ttggagggtc tggttgttta taacaatat cctgttcttc ctgattttt aactgctctt  
250441 tttgataata gcagtgctct aaggtaacaa aagtaagtt tccacttttt cttgttttt  
250501 cttgaatctt ttttattgtg gttat tttttg ttgcatcttc tccaataatc aaaggggtaa  
250561 taaattttaa tctacctct gccacatac gattgacttc accaaagctt ggcaaaaagc  
250621 ttttttatc tagtcctagt ttaggatggc catctctgcc taatttatct ggagtttagtg  
250681 cttcattaaa aaagccat tgccaaagat atggaagggc atcgccattt ttaattgct  
250741 tagattgtag cgttgcaaca attttttgca cctgtttttc attgatgttt tctgtaaatt  
250801 tttctgttt tccaataaaa ttttcataac tca tttttttt ctccttaatt taaaatacct  
250861 aaaaataata atacaaaacc aaatactacc aaaattaaag gtaatattat caatcttata  
250921 aaaagatagc gtttttctt ttcattctgt gcaccagcca aaaccaaggc tccgcctgtt  
250981 gaaaaacttg aatatccagt aatgttgca aatactgcga ttatagaaaa tgcaagtgat  
251041 ggctcaagcg ctttgattga tggtagata gagaaaaatg ttggcataac cccccatg  
251101 cttgaggcaa acgcactcat acaagaagat aaaattccaa gcaataata aagccaatta  
251161 ctgctacttg aaccgtgcgc actcataaat gttgtgatat tttccattat gcctgttgtt

251221 ttactgagct caataagcat agaaagtgat ccaatcatga aatcaaatc ccaaggcaca  
251281 ttcttaaatg cttctttttc actaccaatt ccaaatatta ctgctaaaac gattccaaga  
251341 aatgaaacaa aaacagggtt aaaaatggaa gttacttttt ttagtgtttc atcatgagga  
251401 tttaaagcaa gaaaaaaga cgggatcata ataaccgcaa aaacaaagca cacaataaaa  
251461 atcgtcttcc attgvcgagc atttaatctt tttggttttg taatttgcgga agtaattttc  
251521 acctataac cttttagcaa aaaatatccg attataaaaa tcaaagtatg tgcaataaac  
251581 atatttttac ctaaatttaa ttgcattatt gcagaagctt ctgctgaata accaagtttt  
251641 tcgataagat caaaagttac tctgccacca agggtaaagg gattaaatcc acctgcacag  
251701 gaaccagaat aaataataat agctgctaaa atcttattca ttttgatttt gctagcaata  
251761 taaagaacca aaggactcat aaaagcaaag cctgcataat gtcctggctc aattcctaca  
251821 aataccataa ctgtaatata aagtgcataa ggaatactcc aaggctctgtt cctaacagaa  
251881 tacacagctt ttaatgcaag attgttttagc gtaccatttg caatcgcaaa accataaaaa  
251941 taagtaatag aaagaagtat aaaaaataaa cttaaacttc cattccaaag attaatacacc  
252001 ttttctggtg ttataccgta aaggatgccc ccaataaagg ccgaaagcat cgcaaagact  
252061 ccgatatttg ctttaagaac atagcccaaa gcaattgata ttatgaggga aaataaaata  
252121 ataataattaa tagtatccat catttagctc cttatcttga gtaattttta gataattttc  
252181 tactaacttc caataaaaaa cacttaataa ctatcaacia atttttgaca aataaaaatt  
252241 ttatttaata atgttaccaa tattctcata ttttaattt attgttactt aattaagcaa  
252301 atttaaaaaa attatatatt tcatttttat atatttttaa tatgaaagtg atattttaaa  
252361 tattaataaa tttttattac aatattacc atttgtcaaa ttatttttta tccattaaaa  
252421 agtataaatg cttctttaca tcttctatat tgttttattt gcaatataga ggatataaag  
252481 tattcattat ttatctctta tttttattaa actttttttg taggttttgc tttattgtca  
252541 aaattttaat tttctagaat aatttgaaaa ttttaagaa tttttttatt aagtagagtt  
252601 tttagctttc gctaaaagct ccaagttgaa gaattttttg catgcgattt gaagcaagtt  
252661 ctgctggatc tattttttct aattcatcca aggccttttt aacataatca gctatagcaa  
252721 cagcagcagc ttctttattg cgatgggctc cgttgatagg ctcttcaatc acatcgtcaa  
252781 ttaagccttg actttttaaa tcatctgcag taactttcat agcttttgtt gctgcttcac  
252841 ttttagaagg atcattccaa agtatagccg cacaaccctc aggagaaatg acagaaaaaa  
252901 ctgaattttt catcattgca agcttatcag ccacacctat agccaaagct ccaccacttc  
252961 ctcttctcc tataaccaca gctatagtag gagtttttaa atcgctaagt tcatacaaat  
253021 ttgtagcaat agcttcactt tgaccacgtt cttctgctcc caaacctgga taagcaccgg  
253081 gggatcttat caaaaacaaa ataggaattt gaaatttctc tgcaagtctt gccactctta  
253141 aagcttttct ataacttca ggatggggca tgccaaaatt tctagcgatc ttttcttttg  
253201 tgccacgtcc cttttgttct cctataacta taagtttttt ttctcctaaa tatcccataa  
253261 aacaacaat agcaggatca tctctaaaag cacgatctcc gtgaatttca taagcatcat  
253321 ttaaaataag atctatataa tcaagtgcac aagggcgatc tggatgacga gcaagttgca  
253381 aacgtccaaa atcgcttaaa tttttataag ttttagcaat ttctttttcg agattttttt  
253441 taagtatagc aacagcctcg gtatcaccct taatttgagc attgataata tcttcatcaa  
253501 tttgctgaat atttttttca aaatctaaat acgaagccat atcaatctac ttttttaaat  
253561 accacacaac catttgtgcc gccaaagcca aaagaattac tcatcacaac tcttaaatcc  
253621 gcttttctgg cctcatttgg tatataatct aaatcacatt ctctatcgct aacaaattga  
253681 ttaatagtag gtggcataat tccattgtct aatgccatga tactaataac cgcttcaata  
253741 gctcctgcag cacccaacaa atgccctggt tgtccttttg ttgagctaac cgctggaatt  
253801 tcacttcaa aaagctcttt aattgcagct gtttcatttt tgtcatttac tggcgttgaa  
253861 gttccatgtg cattaatata atctaccttt ggatttctct ccatttttaa ggcttttttc  
253921 atcgctctta aaggtccatc taatgtaggt gaggtaatgt gatgvcgcatc agcactttct  
253981 ccaaaaccaa ccaattcagc ataaatctta gctccacgct ttttagcctc ttcatactct  
254041 tcaaaaacta aagcacctgc accctctccc attacaaaac catctctttc tttatcaaaa  
254101 ggtcttgaag cgtgagcagg atcatcattt ctagtagaaa gggctttcat cgaagcaaaa  
254161 ccaccgattc ctacaggaca aatagcagct tctgcgcaa ttactaacat tttgctagca  
254221 ttacccaaag ctatactttt ataagcttct cctatggcat gagttcctgc tgcacaagcc  
254281 gttacacaag aaatattagg tcctttaagt ccgtgttcta tagaaattaa accgcctagc  
254341 atatttacta aagctgaagg tataaaaaat ggagaaattt tacgaggacc acgttcagaa  
254401 caaataacag aattcttttc tatatttggc agacctcaa ttcccgcagc tgaacaact

254461 ccaaattcctt ctttgtctaa attttgatca aaattagcat cttgcattgc ttcacgagca  
254521 gctttaatac ctagctgaat aaaacgatcg atttttttaa cttctttacc atctactact  
254581 tctagaggat cgaaatthtc aatttctgct gcaatttgaa ctggaaagtc tghtagtatca  
254641 aaaagagtga ttttttccac accactctta ctttcacaaa tcgccttaaa agaactttct  
254701 ttatctaaac ccaaggcatt gatcatacca atacctgtta ctacaactct tttcaagaac  
254761 aagctccttg taaagtgaat tttctaaaat tattttttaa gattttcgat ataatttaca  
254821 acatcctcaa ttttaattag tttttcagca tcactatctg ggattttctac ttcaaatttt  
254881 tcttctaattg ccataataag ctctacaaca tccaaagaat ctgcacctaa atcttcaatg  
254941 atttttgatt ccatcttaac agcatccgca tcaatgctta attgctctac caccactgct  
255001 tttacatcat caaatgttg cttttatata tctccttgat aaaaattaaa ataaagcgta  
255061 ttttacaata aaaaacttaa aatatttata gtttttgact atactttata aaaaccattg  
255121 aatttttagga gtaagaaatg cttttttctc gacttattga aacaaattcg cacatttggg  
255181 atgaatattt acatcatgaa tttgtaaaaa aattagaaaa tggaaagtta aaagaagaaa  
255241 attttctttt ttatctcaaa caagattata tctatctcat ccattatgct aagtgtctatg  
255301 cacgacttgc cttaaagca aaaaatgccg aagaactacg ctttgcaatg aaatttcaaa  
255361 actacattat agaaggagaa attgaaactt ataaaagtat tttaaaactt ggcataaatg  
255421 ctgataaatt aaatgttaaa gatgaaagtt tgaccaatat agcttacaca cgctatatgt  
255481 taagcgtggg tgaaagtgga gatttttttag atatgttagt ggctttaagt gcttgtgcca  
255541 taggttatgg ttatatagga gctgaaattt ataaaagact cggcaaggaa aaacttcaaa  
255601 atcaccctta taaagaatgg attttaacct atagttcaga tgaatttcaa agtgaattaa  
255661 aagaatttga agatttttta aattcttata ctcaaaaaat atctcaagaa aaatttgaaa  
255721 atcttagcga aattttctat aatgtagtgc gtttagaaaa tgctttttgg gaacatgctt  
255781 tgcaaatgaa aatggatatt taaagcaagg aaaatccttg ctttaagctt tgtaaagtth  
255841 aaaatctccg tttggaaact gcatttttagc acttaaattg tcaagataaa aaacttcaaa  
255901 tctagaattt tgtggagttt cataaaggct tacaagataa ggatattttt caaacattaa  
255961 ctcttttact tttgcgttag attcaaaaaac tgcatttgcc ctaagtctta aaaaaacacc  
256021 ctctctagag caagaacaaa attcaatacc attataattt tgtatatgtt taaaaagtcc  
256081 tttattatta gaagtgc aaaataattct atcccctaca agcaaagggc tttgcatagg  
256141 acgaactcta ggatttccac aagttcctaa agttgtcaaa aatgcaggag tattttcatc  
256201 taaaaattgt gcgatttctt ttaaattccat atgctttcct tacatatata atccgccatt  
256261 gatttttaagc acatcacctg tcacataaga agcataatca cttaataaaa acgctacaca  
256321 atttgcaact tcttcagggt ctgcaaagcg ttttaaaggg atattatctt gataagcttg  
256381 tttgatttca tcgcttaaaa tctctgtcat atcactttta ataaagcctg gagtaacaca  
256441 attaaagcgt aaatttctac tcgctccctc tttagcaaaa gacttagtca tagcaatcat  
256501 tccaccctta ctagcagaat aattagtctg acctgcattc cccatttcac cgacaattga  
256561 agcaatattt acaaccgcgc caaaacgctt tttactcatt gtttttaag cttctctaca  
256621 acctaaaaac gctgaactca aatttgtatc tactacacca gtaaaatcct ctagtthcat  
256681 tcttaaggca agtttatcgt ttgtaacgcc tgcattattt acaagataac taagttctcc  
256741 atcgctttct actatagttt ttataaccatt ttcaaactca tcttctttgc ttgcatcaaa  
256801 tttaatcaca gccgcattgc caccttgtgc aagaatttca tcttttaaag catctgcaag  
256861 ttctggtttt gaacgataat taatccaac ctttaatcca aaacttgcca aagtttttgc  
256921 aatagaagca ccaataccct tgcttgcgcc tgtaatacaa acattttttc cactaaattt  
256981 catttctatc cttaaaaaaa atataaaaaat taaattttta caaaaatcta tatcaaaagg  
257041 caaacagatc aaaataaagc ctcatcatt tcttttgga tttctaaatt taatatttta  
257101 agcacactcg cagcgatatt actaagccc atattttcct tcagtttatc cactcccttg  
257161 gcttctacaa aagcaaaaac atcaaaagtt gtatgattgg tcaataaatt tctttttta  
257221 tcttgcatag cttcacaatt tccatgatca cttgtaataa taaaggcata atcatgcttt  
257281 cttgcgcatt caaccacttc acccaaaaa gcatctactg cctctacagc cttaacagca  
257341 gcgttaaaat ctctgtatg acctaccata tcaccatttg caaaattcac cactataaaa  
257401 tcttaccct tttctatccc ttttctaacc gcatcacata cttcaaaagc actcatttca  
257461 ggcttttcat cgtaagtttt tacctttggg cttgggatta aaacccttgt ttcatthct  
257521 aaaagctctt cttttctcc attgaaaaag aaagtgacat gggcatattt ttcagtttct  
257581 gcagtgtgaa gttgagtaag tcctgcttta gagatggttt cagaaagtgt gtttttaatt  
257641 tcttcttttt caaaaagtac tggaaatatta aatttatcat cataaacact catagtaagt

257701 aaatthtcaa acactthtctc tctctcaaat tccttgaaat tttgagaatt taaaacttgc  
257761 atcagttggt tcattctatc atthtctaaaa ttaataaaaa tcaatccatc atcttcttgc  
257821 atacctttat aattctcatt ttttagccgct tggataaatt catcagttat ttcattttga  
257881 taacattctt ccacataatc aaccaaattt ggcacaccct tacttttacc caataaacia  
257941 tcataatatt ccttgactct ttcccaacgc ttatctctat ccatagcgta aaaacgcccg  
258001 caaagcgtag caaaatgcac acctatthtt tcacaaatgat ttttaagctt ttttataaat  
258061 tctagtcgct ttgtagggtc tacatcgctc ccatcggtaa ttgcatgtgc aaaaacttca  
258121 tttccatttt tagcaciaat ttcaagcaaa gcattaaaaat gcgtatccat agaatgaacc  
258181 ccaccatcac tatataaacc gataaatgc accctthtgc atthttgtaa agtthtttt  
258241 aaatttgctt ttttctcaag ttcgtaactc tctatagctt tattaatgct caccagattt  
258301 tgatagataa tttgcccact acctatgcac atatgacca cttcactatt tcccatttga  
258361 ttttcaggca aacctactgc taaaccacta gthtttgatta aagaatttgg tacttcttta  
258421 aaaagcctct cgtaatttgg cthtttagca gcctcaaaag cattaaaaatc tthttccttg  
258481 ttaaaacctc tcccgtctgt aataaccaa atactthtt gtctcatttt ttactctttt  
258541 ataagaaatt ttttgctag atthttactaa aattaagctt ttaaaaacca aaaagaaggc  
258601 tagctthtgt attatctttc ttatthtagc gattatgctt tthttactta tatcagtggtg  
258661 cgcgctgggt ttgctthttt tattgcttta tgtttatctt tattcattat gcctaaattt  
258721 attacttggg ctaaaaataa aaatgcaaat caaccattt acgaattagc acctcaaaact  
258781 caciaaagtca aatctcaaac gcctacaatg ggtgggctta tthtcatagc ttgtgcagtc  
258841 tttacaagcc ttatthtgtt caaattggat aatgtattta caatcacagc cttatthtgt  
258901 cttgtgcttt tttgtcttat cggacttgtg gatgatttgg gtaaaatttt aaaaaagac  
258961 aacctctag gacttagtcc aaaagcaaaa cthtttagccc aaataagcgt ggcattaatc  
259021 tgtatthtgc cthttatatt tagtcctgaa ttaataacgg aatthttatct tcctthttat  
259081 aaatatccgc tthttgatat gaaaattttt gctcttgctt tttggatttt ggtcttaatc  
259141 tcaagctcta atgctgtcaa ttaaccgat gggcttgatg gacttgcaac tgttcttagt  
259201 atthtttctt tatctactt gggtatattt ttatatttga gtggaaattt aaactatagc  
259261 gaatatttac tthttacctaa aattcaaggc ctaggtgaag tagtgattat ctgtgcagca  
259321 ttgattggag ctcttatggg atthtttatgg tacaactgct acctgcaca agthtttatg  
259381 ggagatagtg gaagcttggc tttgggtgga tttataggct tthtagctat tataagtaaa  
259441 aatgaaatct tactthttact cgtaggcttt gtctthgtac ttgaaacctt ttctgtcatt  
259501 ttacaagtag gaagctthta aatthtttaac aaaagagtat ttaaaatggc gcctatacac  
259561 catcatttht aaaaaatagg ctgggtagaa aataaaatca tagtacgttt ttggatgata  
259621 gccttgctat ctaatttact tgcacttgca tcgataaagt taagataatg aaaatttctgc  
259681 tthttggata tggaaaaacc acacaggcaa tagcaaaaaa tttagttaat aaattcggctc  
259741 cthttgacat ctatgatgat cactthtcaag aagaaaaata agatgaatgg ggcaatcatc  
259801 tthtaaatcc taaagaattt gatgaaaaac taagcaagct tgaattcca agccctggat  
259861 ttccaccaa tcatattctt ataaaaaaag caaaaaattt acaaagcga tatgattttt  
259921 tttatgatgc tatgcaaaa tctatthtgg tcaagtggcac aaatggcaaa accacaacta  
259981 caaaatggc tacacactg cthttcgatg taggagcaat aatgggagca aatgthtgggt  
260041 ttctcttagc cgaacttgat ttaaatgcca aaatttggat acttgaaact tcatctthta  
260101 cacttacta taccatact gcaaaacctg aaatttacgc actcttacc ataagtgcgg  
260161 atcatctttc atggcatgga agthttgaaa attacgtaa agataaattg agtthtttgg  
260221 aaagaatgaa tgagtgtgat attgctgatt tgcctgaaat ttatgcaaaa acaccacaa  
260281 aagcttatat tatctctat aaagatgaat ttgatcttgc tcaaaaaatg gatattgata  
260341 taaaaaaaat atctthttaa agtcctthtt tgcttgatgc tgttatggct ttaagtatag  
260401 aaaaaatttt acttgatacc ttaagctatg aactthttaa tcatthtgtt atggaaaaaa  
260461 ataaacttga agaattgcaa gataatcaag gtagacttht gatcaatgat actaaagcga  
260521 ccaatgaaaa cgctgtaat gccgctctta accgctataa agataaaaaa atctatctca  
260581 ttataggcgg tgatgataag ggtgtagatt taagcatgtt atthtaattt atgaaagatt  
260641 ttgatgtaga actctatgcc atagggttga gtactcaaaa aatgttagat tatgctthta  
260701 aagcaaatth aaaagctcat aagtgtgaat tthtagaaaa tgctgtcaaa gaaatttcca  
260761 aaacgttaaa aaataatgag gtagctthtt taagccctgc ttgtgcaagc ttgatcaat  
260821 ttactctta tgctcaact ggagaaaaat ttaagaata tgtgagtaaa atthtaaac  
260881 ccaactcac ttctctcacc ccaaacacat tcaacaata aaaaaacca acaaatthta

260941 ccagcctagc aatcaatat cttaacacca ccaaaaaaac catacaatga aattataaac  
261001 caaacacaaa gacaacacaa ttaagctaaa aatta

//

LOCUS DMACINML\_2 253157 bp DNA linear 16-DEC-2020

DEFINITION Campylobacter species strain strain.

ACCESSION

VERSION

KEYWORDS .

SOURCE Campylobacter species

ORGANISM Campylobacter species

Unclassified.

COMMENT Annotated using prokka 1.13 from  
<https://github.com/tseemann/prokka>.

FEATURES Location/Qualifiers

source

1..253157  
/organism="Campylobacter species"  
/mol\_type="genomic DNA"  
/strain="strain"

gene

complement(246..1586)  
/gene="radA"  
/locus\_tag="DMACINML\_00260"

CDS

complement(246..1586)  
/gene="radA"  
/locus\_tag="DMACINML\_00260"  
/inference="ab initio prediction:Prodigal:2.6"  
/inference="similar to AA sequence:RefSeq:CAL35320.1"  
/codon\_start=1  
/transl\_table=11  
/product="putative DNA repair protein RadA (ATP-dependent protease)"  
/protein\_id="Prokka:DMACINML\_00260"  
/translation="MAKNKILFECQACGNQQSKWLGKCECGSWDSFIELKSEQIKVL  
KEIAQASTKASEAICIEDVELEHFSRCSTDDDELDELVLGGGLVEGSLVLIGGSPGVGK  
STLLLKIASNLAKNKKVLYVSGEESKAQIKLRADRLEANTPNLFL TELCLENILEE  
LHKDYEILIIDSIQTLYSNKIASAAGSITQVREITFELMRVSKTYNISTFIIGHITK  
EGAIAGPRVLEHMVDVLYFEGDATKEIRLLRGFKNRFGGTSEVGIFEMTPKGLISAK  
DLANRFFTRGKATSGSALGVMEGRALVLEVQALVCESSYPKRSATGYEKNRLDMLL  
ALLERKLEIPLGHYDVFINISGGVRVNETAADLAVVAAISSFKNRPLSKDCVFIGEL  
SLNGEIREVFSLDTRLKEAKMQKFKNAIIPSKPLEDVGLKCFVAKELAQVLEWM"

gene

1720..2571  
/locus\_tag="DMACINML\_00261"

CDS

1720..2571  
/locus\_tag="DMACINML\_00261"  
/inference="ab initio prediction:Prodigal:2.6"  
/inference="similar to AA sequence:RefSeq:ABS43588.1"  
/codon\_start=1  
/transl\_table=11  
/product="carbon-nitrogen hydrolase"  
/protein\_id="Prokka:DMACINML\_00261"  
/translation="MQKLLKVALIQFAPKSYEVQNNLDKALKLAHLALEQGAKLIVLP  
ELYDSAYCVEDQDEKFSNLHQHPNLDALQKLAKNYQAYIVACSIKEDTQLYDSAYI  
ISHKGLLVYRKYIYLWGNKERFARGDKYPIFELEFENFKLKLGLQICYEIGFSEGR  
FLALQGAETICFPFAFGKARTYVWDLASRARALENGVFVLAANRSGSEISKINNETLT  
FAGKSKIINPKGEILKEILEEEGFIIAELDLEEVQIQRKNLPYLKDLNLKLNQEILT

gene IHLNLTKE"  
 2574..3455  
 /gene="pdaA"  
 /locus\_tag="DMACINML\_00262"  
 CDS 2574..3455  
 /gene="pdaA"  
 /locus\_tag="DMACINML\_00262"  
 /EC\_number="3.-.-."  
 /inference="ab initio prediction:Prodigal:2.6"  
 /inference="similar to AA sequence:RefSeq:SQE24513.1"  
 /codon\_start=1  
 /transl\_table=11  
 /product="polysaccharide deacetylase family protein"  
 /protein\_id="Prokka:DMACINML\_00262"  
 /translation="MAKEILVAYGVDIDAVAGWLGSYGGEDSPDDISRGLFAGEVGIP  
 RLLKLFKKYNIPATWFAPGHSIETFPEQMKMIVDAGHEIGAHGYSHENPIAMSAKQEE  
 DVLLKSIELIEKISGKKPSGYVAPWWEFSNITNELLLKHGIKYDHSMLMHNDFTPYYVR  
 VGDKWTKIDYSKDAKEWMKPLVRGQETDLIEIPANWYLDLPPMMFIKSPNSFGFVS  
 PRDIGQMWIDQFDWVYREMDYAI FPM TIHPDVSARPQVLLMHERIIIEHINKHEGVKWW  
 NLNDMADDFSKRFPRKK"  
 gene 3497..3832  
 /locus\_tag="DMACINML\_00263"  
 CDS 3497..3832  
 /locus\_tag="DMACINML\_00263"  
 /inference="ab initio prediction:Prodigal:2.6"  
 /inference="similar to AA sequence:RefSeq:ABS44315.1"  
 /note="conserved hypothetical protein"  
 /codon\_start=1  
 /transl\_table=11  
 /product="hypothetical protein"  
 /protein\_id="Prokka:DMACINML\_00263"  
 /translation="MCILCGEMISTLHWSELNFKEEKHEL SVGEEQKERL KIRLKKVK  
 ILNEILEFYGLK LKEWQNSKYILSNKKGRDII VNDLGLDWIKASELEKKSFDVLDENL  
 LHFLRAKHG"  
 gene 3825..4769  
 /locus\_tag="DMACINML\_00264"  
 CDS 3825..4769  
 /locus\_tag="DMACINML\_00264"  
 /inference="ab initio prediction:Prodigal:2.6"  
 /inference="similar to AA sequence:RefSeq:ABS43326.1"  
 /note="conserved ATP/GTP binding protein"  
 /codon\_start=1  
 /transl\_table=11  
 /product="hypothetical protein"  
 /protein\_id="Prokka:DMACINML\_00264"  
 /translation="MAKIPVHVVTGFLGSGKTTFLKEILSNQTLNDIALVINELGEVS  
 LDHKL IQTDFIEEQTLFLNAGCACCNKREDLQKKFKEL LDSFENKGRPQRVILETSG  
 LANPAPIIFTFQSDVFLANHFELANIITCIDAFEGLNHLQNEEACNQVLSDFLILTK  
 KDLNPNTQSLEEKINTLYPNIQIISKENFNFDMLSSHKIQKEIKNIEIKSHKDDISS  
 ITLIFDKAINWNIFSIWLSMLLHEHGSKILRVKGLINTEESYLTNINGVGH LIYHPTH  
 TKISSLNHPSQLVFI AKNLKLDKIKESLENFLKLEQLN"  
 gene complement(4766..5632)  
 /gene="ftsY"  
 /locus\_tag="DMACINML\_00265"



CDS complement(4766..5632)  
/gene="ftsY"  
/locus\_tag="DMACINML\_00265"  
/inference="ab initio prediction:Prodigal:2.6"  
/inference="similar to AA sequence:RefSeq:CAL35321.1"  
/codon\_start=1  
/transl\_table=11  
/product="putative signal recognition particle protein"  
/protein\_id="Prokka:DMACINML\_00265"  
/translation="MFNFFKKGLAKTLESIVGVKGENKKITKDLLLEEILLEADVAYEIV  
VEEIIYYLPPSDEVKEDLKRVMGSYFLYENKEFLDEKPFVELILGVNGAGKTT  
SIKLANLYKSQGGKQVILGACDTFRAGAIEQLRLWSEKVGVDIVLTQQGHDP  
SAVAFDTISKARAKDFDRVIIDTAGRLQNQKLANELEKIVRISAKAMPNAPHR  
KILVLDGTQGNAGILQAKAFNELVQLDGVITKLDGTAKGGALFSIARELELP  
ILYIGVGEKMQDLIEFNAQNFLDTLLEGVFD"

gene complement(5632..6189)  
/locus\_tag="DMACINML\_00266"

CDS complement(5632..6189)  
/locus\_tag="DMACINML\_00266"  
/inference="ab initio prediction:Prodigal:2.6"  
/inference="similar to AA sequence:RefSeq:CAL35322.1"  
/codon\_start=1  
/transl\_table=11  
/product="putative lipoprotein thioredoxin"  
/protein\_id="Prokka:DMACINML\_00266"  
/translation="MKIKKVFTLAILLSFFVACSNKDKQSDMNASVQSSLSQSD  
SLRFNLNLIDGNSVFKDNENLNFADGDKATLFVFFTTWCSPCIAEIPHLNKL  
QEKEYEQFNIVGVLLEDKSDEELKAFVEENQILYKIANGENNYLLAKILGGV  
NGIPTMFLYDKNSQLVNQYLGLIPEEMLEIDIQKAIL"

sig\_peptide complement(6127..6189)  
/locus\_tag="DMACINML\_00266"  
/inference="ab initio prediction:SignalP:4.1"  
/note="predicted cleavage at residue 21"

gene 6816..8369  
/locus\_tag="DMACINML\_00267"

CDS 6816..8369  
/locus\_tag="DMACINML\_00267"  
/inference="ab initio prediction:Prodigal:2.6"  
/inference="similar to AA sequence:RefSeq:CAL35324.1"  
/codon\_start=1  
/transl\_table=11  
/product="HD/KH domain containing protein"  
/protein\_id="Prokka:DMACINML\_00267"  
/translation="MIESLIALITAIVGLGIGYLVAKKINDAKYEIFVEQAKAKA  
KAI EYEAEILKDAKNSILNAELEVKKKYEDKTHKIQKEFNQKFDELSKKEQ  
KLQLQEESLKENQEELLRSKQMLDLQSDADKLNQYQAKLNDVNLILEHSAGL  
TQDEAKNIILEKVEENSrneIAHIVRRYEEEARNEAKRRANYIIAQATSRFAG  
EFAAERLINVVNIKNDLKGRIIGKEGRNVKTEMVLGVDIIIDDTPGAIIVSC  
FNLYRRRAIATKVIELLVEDGRIQPARIEEIEHEKVCKEFDNAILEEGETIL  
MDLGLSKVHPEITKLIGKLYRASYQNAL AHSLEVAHLAGIIAAECGGDENL  
ARRAGILHDIGKALTHDFEGSHVDLGAELCKRYKEHPVVINAIYAHHGHEE  
ATSIESAAVCAADTLAARPGARREVL EAF LKRVSELEEIAK SKEGIKNAY  
AINAGREIRVIANAKLVNDDSVLLAKEIAAEIQEKMQYPGEIKVNVIR EL  
RAIEYAK"

gene 8379..8936

CDS /locus\_tag="DMACINML\_00268"  
 8379..8936  
 /locus\_tag="DMACINML\_00268"  
 /inference="ab initio prediction:Prodigal:2.6"  
 /inference="similar to AA sequence:RefSeq:CAL35325.1"  
 /codon\_start=1  
 /transl\_table=11  
 /product="putative integral membrane protein"  
 /protein\_id="Prokka:DMACINML\_00268"  
 /translation="MQDMIDTLLKYGYIVLFFYSLGGMVGILAAGVLSSQGKMDLTL  
 CISIAFVANTLGSTLLFILGKYYKKDIMPYFKNHRRKLALAMMKTQKHGVVLLITQKF  
 VYGLKTFIPIAAGIAKYQFIKFFIINTLASLLWAVLLGYSAYAFGFVIEAIFNKLSSY  
 PYIAPLFLIVLVGIIWFYLAKFSKK"

gene 8936..10195

CDS /locus\_tag="DMACINML\_00269"  
 8936..10195  
 /locus\_tag="DMACINML\_00269"  
 /inference="ab initio prediction:Prodigal:2.6"  
 /inference="similar to AA sequence:RefSeq:CAL35326.1"  
 /codon\_start=1  
 /transl\_table=11  
 /product="putative competence family protein"  
 /protein\_id="Prokka:DMACINML\_00269"  
 /translation="MSFWNSLYLNLKEFRYLFGLIVFIFNIFLEYNHFLTLKEKKH  
 YLVENALLLHYYPKYNNKKYWLKLTQDFILYSTSFKDLNLSKNQLNLKIITNN  
 ISFRDYLRKSFYAPSYGFEASGYFKNNVIISYFLNQHTNEKIQEFYGFALFFALPISSE  
 LRKDVNYYGVAHLIAISGYHIGLLFALVFFILTPLYSFQKRYFPYRSLRFDLSVFIF  
 ILLFAYAYLIGFVPSYIRSLIMALWGFYLLCKNIKILSFFTLFISIIYLCIALYPRLLL  
 SVGFLFSCLVFYIFLYLHHFSKFFHNFLNIVLLNIWTFFCMIIPVLYFPLISYQQF  
 LAIILSGIFIVFYPLVCLHFIAHGNNLDTVLIDFFNIKFYAIDIKIPTWILISYLT  
 SFIAMRYKILALLCVFANFIPFIMIMI"

gene complement(10139..10945)

CDS /locus\_tag="DMACINML\_00270"  
 complement(10139..10945)  
 /locus\_tag="DMACINML\_00270"  
 /inference="ab initio prediction:Prodigal:2.6"  
 /inference="similar to AA sequence:RefSeq:ABS43802.1"  
 /codon\_start=1  
 /transl\_table=11  
 /product="YihY family protein"  
 /protein\_id="Prokka:DMACINML\_00270"  
 /translation="MKRIFAILSNLRDKEILNYAAALSFYIILSLIPILFVCFVFTQ  
 ISSFKVYYEKAKQIIFAFILPAQQDIVAAYLDTFLNNSVNLGIVGLIAMTFTSLAFFS  
 GYDFVINRITKNEPKGLWQSISSYWTLLTLVPLGLGLSFYISGLIQQALDDYKIGFNF  
 FEILPFVIIWGLFFISYSSSIHKGTLSLILVLSFAAGAIWYIGKNLFVYIVYVYNTYA  
 SVYGSFSTILFFFIWIYISWIVYLFGIKIYYFLNHNHDKGDKIRKNTKKG"

gene complement(10957..12339)  
 /gene="glcD\_1"

CDS /locus\_tag="DMACINML\_00271"  
 complement(10957..12339)  
 /gene="glcD\_1"  
 /locus\_tag="DMACINML\_00271"  
 /inference="ab initio prediction:Prodigal:2.6"  
 /inference="similar to AA sequence:RefSeq:CAL35328.1"

```

/codon_start=1
/transl_table=11
/product="putative glycolate oxidase subunit D"
/protein_id="Prokka:DMACINML_00271"
/translation="MKKEFEQYFIKLLGSEAYFDDIHKRAYSYDATKKHYLPDGVLF
PRNEEDISQILKFCNENNIIPRGAGSGFTGGALAVNGGLILSFEKHMNKILEIDLE
NLVAVVQPGVINIHLQREVAKHGLFYPPDPASMEYSSLGGNVSEAYGMRRAKYGITK
DYVMALRAVLPNGEIIIRAGKRTIKDVAGYNLAGILIASEGSLAVLSELTCLKLIALPKF
KKTAFGIFPSVKSAMNAVYKSLASGVNPNVSMFLDNLISIRAVESKFNKGLPVDAGAIL
IADVDGNVKEAIDEDLKILGEHFLDAGASQFKIAKDEQEAADIWFARRNCSQSIAMYG
TLKLNEDITVPRSKLPALLEGIDEISKYGFKIPCFGHTGDGNVHTNMVMPDKNDEEQ
VKKGYEAVEEVFKLTVELGGTSLGHEHGIGLSKAPFMKLAFDAEMNLMRNIKKAFFDPN
NILNPFKMGL"
gene complement(12344..13063)
/locus_tag="DMACINML_00272"
CDS complement(12344..13063)
/locus_tag="DMACINML_00272"
/inference="ab initio prediction:Prodigal:2.6"
/inference="similar to AA sequence:RefSeq:CAL35329.1"
/codon_start=1
/transl_table=11
/product="putative exporting protein"
/protein_id="Prokka:DMACINML_00272"
/translation="MLKFLAFILSLSISLFAVDLNLKPKMELLKVEDIYGYIEDSPD
IKLNSSGVVIQRFQTSKSIARASVIAKEKGLAKLKFVVFADLEQDALPLPNVVPQKG
DEVVLNFLYDRGLVIAPDEQTYNELVSSFPEIYFTHIDILGAQLIRSSSLAPKRSDFR
KFCADNAVILIFALEDKAKIVDCQDFSELYELAIKPKSSIQVPFYRIGGYKSNFFD
FNSQEVGNYYRYDALINILR"
gene 13187..14347
/locus_tag="DMACINML_00273"
CDS 13187..14347
/locus_tag="DMACINML_00273"
/inference="ab initio prediction:Prodigal:2.6"
/inference="similar to AA sequence:RefSeq:CAL35330.1"
/codon_start=1
/transl_table=11
/product="putative peptidase M23 family protein"
/protein_id="Prokka:DMACINML_00273"
/translation="MKKLLLLFTFVIQSFAALSVEELTWDNGDTLLKFLQRNSIPISL
YYGLDREDQELASDIAYKVYQVLKDENNNIEQVLIPISDDLQIHIYKDKNNQYTLTF
TPVSYQKEDRILHLTISSAYQDVYEESSSTLARAMVRSFRGSVNFRIQKGDVTL
YYEQKRRMGRLWGDIAVRMATVEINKNAQEVFAFNDIFYDRDGKEVEAFLLTKPVNYT
RISSTFSTARYHPILKRYRAHLGIDYAAPTGTPVKSAGKGTITFVGTGKGGYGNVIQVK
HDSGYMTLYAHLRFKIKKGQKVNQQLIGYVGSTGMSTGPHLHFGVYLNKAINPA
SVVKIAKSELSGKAKEEFKNTIVKYKIVNEALAANKPNPPKEEDFENYIEF"
sig_peptide 13187..13246
/locus_tag="DMACINML_00273"
/inference="ab initio prediction:SignalP:4.1"
/note="predicted cleavage at residue 20"
gene complement(14344..14550)
/locus_tag="DMACINML_00274"
CDS complement(14344..14550)
/locus_tag="DMACINML_00274"
/inference="ab initio prediction:Prodigal:2.6"

```

```

/inference="similar to AA sequence:RefSeq:CAL35331.1"
/note="hypothetical protein Cj1216c"
/codon_start=1
/transl_table=11
/product="hypothetical protein"
/protein_id="Prokka:DMACINML_00274"
/translation="MYEKKDLRVLKIIQKAREFGDADLLNEALVNQLVNAEFKEMESK
EREGLIILLNSLIEAKDKALLSNP"
gene complement(14553..15233)
/locus_tag="DMACINML_00275"
CDS complement(14553..15233)
/locus_tag="DMACINML_00275"
/inference="ab initio prediction:Prodigal:2.6"
/inference="similar to AA sequence:RefSeq:CAL35332.1"
/note="conserved hypothetical protein Cj1217c"
/codon_start=1
/transl_table=11
/product="hypothetical protein"
/protein_id="Prokka:DMACINML_00275"
/translation="MGRSGENYLSLLDNQKVSVFCAYDKDYNILRAKVHKENLFSHLG
FKDIEKCVFMDQIHSSKVEIYDESLENLSCDGLISIEKNTALCVLSADCLPLILWHES
GVIAALHSGRKGFSFENILKECVDKIYTKPNLDMQKFHLFILPSICAKNYEIDGEILE
FAKVEFKDFLYERRDLKALVKFQAQNLGIKNIVDSNICSFDDKTFYSYRRDKTSKRF
VSVVYLKG"
gene complement(15197..15808)
/locus_tag="DMACINML_00276"
/EC_number="2.5.1.9"
CDS complement(15197..15808)
/locus_tag="DMACINML_00276"
/inference="ab initio prediction:Prodigal:2.6"
/inference="similar to AA sequence:RefSeq:CAL35333.1"
/codon_start=1
/transl_table=11
/product="putative riboflavin synthase alpha chain"
/protein_id="Prokka:DMACINML_00276"
/translation="MFNGLIREIAKVKSQNNVNLKANYRPNLGDSVAVNGACLSVT
KLHSDGFELSHESRKHIAVQNLKDKVHIEPALRYGDRIDGHLMQGHIDFIGKLEKI
EKDENGIDFYISLPKEAMKFMARKGSIGIDGVSLTINEIVENGVRLLTIIPITFKETLF
KEYKIGREINIESDLLARYIYAQMMDKNKGLSWEEVERITYLY"
gene complement(15818..18358)
/locus_tag="DMACINML_00277"
CDS complement(15818..18358)
/locus_tag="DMACINML_00277"
/inference="ab initio prediction:Prodigal:2.6"
/inference="similar to AA sequence:RefSeq:CAL35334.1"
/codon_start=1
/transl_table=11
/product="putative periplasmic protein"
/protein_id="Prokka:DMACINML_00277"
/translation="MKKILYGIVAFIVLLIAFYTLTLLFTSFGNNIVANFIQDKIKQST
GLDANITQFTLRFSSLDIEANLANMADLKLKLEGNLSLFKLGFDLDYIINLDKNYAKNLG
LNLNQNLAFSGKINGKSSDFMINGKGYLFGSNVLLDARIYEYSPIALNLSANDLQISE

```

```

LLALFGRGNLAKGTIDIASKISAKDLKPDGNAIIKLDNTYINYAEIKKEFNIDLPENS
NLKAEILANIKDDTVYTVSKIYNSYLTQTQKTLYNLIQNTLNTDFDLSVPLAKLEK
LTKTKLNGSLEVKGDASVANNALSSLNANVIGLGGEVKANLKNQNLNLNASNASLEKI
LALIGYGGIVSGNLNANLVSEGLDFANFNADVKNNAKLNSAEIKKIAKLELPNTSFS
LDAKAKAKNGNISYNALLASNLLNIKKLNGTYNLKNAELNTDLNAFIDDL SQFNAIAG
QNLQGKAELNAKAHIIGAQVQNLNADANIAGGLIKANSNGKKLDLDINKLDLSKVFTI
VGMPNYASGIVNAKARLDDINFNNLNGKVNIDAKGILNAAVLSQLMDKKFPNNTNYDL
NVKADLKNNVADFEGVLNSSLANLSNFKGKFDINKMILNSNYALDIADFSKLGFLDR
KLGKASFNIGNIFDKTLNFTALSKNLFEGKLDSTLKNNILNAKLEGVNLSLASGLD
FIDIYQGKANLEVKYNLISEQGEVNADMKEGKLPNAITAALKLITLKDITTDVFHTA
NAKALINKENIKLDLNMQADRSYVLISSGMLNSKSGSLNLPFDIKIDRANFKGNITGT
TQKPQVKLEAGSVNSIKNIVGDKAQDGVQKAGEKVDGINKLLNKIF"
gene      18522..18782
          /gene="groES"
          /locus_tag="DMACINML_00278"
CDS       18522..18782
          /gene="groES"
          /locus_tag="DMACINML_00278"
          /inference="ab initio prediction:Prodigal:2.6"
          /inference="similar to AA sequence:RefSeq:CAL35335.1"
          /codon_start=1
          /transl_table=11
          /product="10 kD chaperonin (cpn10)"
          /protein_id="Prokka:DMACINML_00278"
          /translation="MNFQPLGKRVLVKRVEETKTTASGIIIPDNAKEKPLTGEVVAVS
KEITDIANGDKIVFAKYGGTEIKLDNSEYLVNLDDILGILK"
gene      18804..20441
          /gene="groEL"
          /locus_tag="DMACINML_00279"
CDS       18804..20441
          /gene="groEL"
          /locus_tag="DMACINML_00279"
          /inference="ab initio prediction:Prodigal:2.6"
          /inference="similar to AA sequence:RefSeq:CAL35336.1"
          /codon_start=1
          /transl_table=11
          /product="60 kD chaperonin (cpn60)"
          /protein_id="Prokka:DMACINML_00279"
          /translation="MAKEIIFSDEARNKLYEGVKKLNDVAVKVTMGPRGRNVLIQKSFG
APTITKDGVSVAKEVELKDSLENMGASLVREVASKTADQAGDGTATVLAHAIFKEG
LRNITAGANPIEVKRGMDKACEAIVAELKKSREVKDKKEIAQVATISANSDEKIGNL
IADAMEKVGKDGVITVEEAKSINDELNVVEGMQFDRGYLSPYFITNAEKMTVELSNPY
ILLFDKIANLKDLLPVLEQIQKTGKPLLIIAEDIEGEALATLVVNLKRGVNLISAVK
APGFGDRRKAMLEDIAILTGGEVISEELGRTLESATVQDLGQASSVIIDKDNTTIVNG
AGEKANIDARVNQIKAQIAETSSDYDREKLQERLAKLSGGVAVIKVGAATETEMKEKK
DRVDDALSATKAAVEEGIVIGGGAALIKAKAKINLDLKGDEAIGAATIVERALRAPLRQ
IAENAGFDAGVVNSVENAKDENTGFDAAKGEYVNMLESGIIPVKVERVALLNAVSV
ASMLLTTEATISEIKEDKPAMPDMSGMGGMGGMGGMM"
gene      complement(20946..22151)
          /locus_tag="DMACINML_00280"
CDS       complement(20946..22151)
          /locus_tag="DMACINML_00280"
          /inference="ab initio prediction:Prodigal:2.6"
          /inference="similar to AA sequence:RefSeq:AVS37715.1"

```

```

/codon_start=1
/transl_table=11
/product="sensor histidine kinase"
/protein_id="Prokka:DMACINML_00280"
/translation="MAKKVIRQILLIYLTTTGIFLAIFFTLWYQKLYEELVWVKGTSL
RENHRNIIINILNSRFVPMNESASNIAQSTGLKFAIFDKKQAFDNLDFDRKARVEL
KGRGIYDGKVFFLDRMNTDNYFLKHANEDNIHTESGLKILIQGEDVKKDLWIRVKVF
SFAIMAFCVLGLIAYILVKIALKPLEDKIITLNRFIKDSTHELNTPLSVILMSIEQLE
NQKLEHNTKFTRIKLAAKSLSQVYSDLVFYFPNTLELNKQELDLKALIEERLEYFKI
FFEQKKISLKLNLHQASIFASKNQISKLIDNLLSNAIKYNKKGGEILVELKTGFLSIA
DTGCGISKTNLKHIFDRYARFNTDQGGFGIGLSLVKKICDDNDIKIICESVENEGSVF
KLSWDTKKI"
gene complement(22144..22809)
/gene="dccR"
/locus_tag="DMACINML_00281"
CDS complement(22144..22809)
/gene="dccR"
/locus_tag="DMACINML_00281"
/inference="ab initio prediction:Prodigal:2.6"
/inference="similar to AA sequence:RefSeq:CAL35338.1"
/codon_start=1
/transl_table=11
/product="two-component regulator"
/protein_id="Prokka:DMACINML_00281"
/translation="MAARILLLEDDLSEIIIEEFLIDEGYEVYLCTNAKEALELAYE
KHFDVWILDVKVPLGDGFSLLKELRDCGKQTPAIFMTSLNTTEDLKEGYNAGCDDYIR
KPFELAELSIRIQALLKRAFSHKNEDYEDLNGGFKFSFTSQILYHFDKALTLPSKEIK
LLSLLLKNKNNFLSTERIFEELWEYDEEPSSELSLRAYIKNLRKILGKEKIINQRGRGY
CYG"
gene 22944..23543
/locus_tag="DMACINML_00282"
CDS 22944..23543
/locus_tag="DMACINML_00282"
/inference="ab initio prediction:Prodigal:2.6"
/inference="similar to AA sequence:RefSeq:CAL35339.1"
/codon_start=1
/transl_table=11
/product="putative iron-binding protein"
/protein_id="Prokka:DMACINML_00282"
/translation="MLPKWDSSFSVHNAKIDDQHKKLFELAAKVEIVSDRSVSKNEVK
ELLAEFFNYMKDHFNDEEKYMLIAYPAFEEHKKIHKEIIQTMINLIKDIKSTNDLKE
KLYIIAKKWLEHILYEDMKVEKWRSSSLATDEGKDVSFEAADDSDDDKQPFYLYKCN
CPGKVHDPYGIHQKIELQGHKFTCKTCKQAITFFQKHS"
gene 23557..23922
/locus_tag="DMACINML_00283"
CDS 23557..23922
/locus_tag="DMACINML_00283"
/inference="ab initio prediction:Prodigal:2.6"
/inference="similar to AA sequence:RefSeq:ADT66500.1"
/codon_start=1
/transl_table=11
/product="Ribbon-helix-helix protein, copG family"
/protein_id="Prokka:DMACINML_00283"
/translation="MKQETRNYSLRMPLELKERLDNLSKNLSKPKSSIVREALEAYLN

```

EIEDFSFAVNALEELKGDYKASKKIDKVVENLQKESDDLGDGDFFAIEALEELKGDG  
YKASKKIDKIVKNLKKPE"

gene complement(24006..24080)  
/locus\_tag="DMACINML\_00284"

tRNA complement(24006..24080)  
/locus\_tag="DMACINML\_00284"  
/product="tRNA-Asn"  
/inference="COORDINATES: profile:Aragorn:1.2"  
/note="tRNA-Asn(gtt)"

gene complement(24160..25410)  
/locus\_tag="DMACINML\_00285"

CDS complement(24160..25410)  
/locus\_tag="DMACINML\_00285"  
/inference="ab initio prediction:Prodigal:2.6"  
/inference="similar to AA sequence:RefSeq:CAL35341.1"  
/codon\_start=1  
/transl\_table=11  
/product="putative two-component sensor (histidine  
kinase)"  
/protein\_id="Prokka:DMACINML\_00285"  
/translation="MNRSSIFYTITFIFIFAGVSVILGFLWLIEYDQQNYTRELNTKY  
SLIANARLLNFAGIISEKEFEEQTKNYNKMESVVEVRQIRIRILFGGEVLARVEVNGL  
IEIISYDRQVYLNIIIFDGKVNLYKDQDYQTYRYFIIKAIAVAVICILVLLYIYIFKKL  
KPLKALKRQIDKFAQGKLNIDVSTGVDEISQVSEAFYQAIQIRKLNQSRQFFLRN  
IMHELKTPITKGLITLMELEDNKYKERLGSIFNRLEILINEFAAIEQITSGAAFINRK  
KYNILDVLDEAKEIAMRDDNNIRIFMDESFFVNVDFKLFITAIKNMIDNGIKHSENGF  
IQIDIMDDYICFKNRGPELNNTLEYTQAFTQGGSKQKSSFGLGLYIVNTILESHGMK  
LDYDYEEGVNLFYFRNLKSIIVKE"

gene complement(25407..26081)  
/locus\_tag="DMACINML\_00286"

CDS complement(25407..26081)  
/locus\_tag="DMACINML\_00286"  
/inference="ab initio prediction:Prodigal:2.6"  
/inference="similar to AA sequence:RefSeq:CAL35342.1"  
/codon\_start=1  
/transl\_table=11  
/product="putative two-component regulator"  
/protein\_id="Prokka:DMACINML\_00286"  
/translation="MTNILMIEDDLELAEITAELYEKFDMKVDIAHEPYIGLSKLALK  
EYQLIILDLSLPGLDGLEVCEEIRKKYDTPIISSARHDITDKVNALELGADDYLPKP  
YNPKELQARIKSHLRRISNTKSIAIKSVKDLVYDQYKHIITMKGQELTLTNAEFDILS  
YLIKKEGGVVSREELVYNCSSISEDSSNKSIDVIIISRIRQKMGDDPKTPKYIHSIRGI  
GYKLTQ"

gene complement(26164..27582)  
/gene="htrA"

CDS complement(26164..27582)  
/gene="htrA"  
/locus\_tag="DMACINML\_00287"  
/EC\_number="3.4.21.-"  
/inference="ab initio prediction:Prodigal:2.6"  
/inference="similar to AA sequence:RefSeq:CAL35343.1"  
/codon\_start=1  
/transl\_table=11

```

/product="serine protease (protease DO)"
/protein_id="Prokka:DMACINML_00287"
/translation="MKKLILSLASALFAANINFNETSITTNRVNPAAGDTILSYHD
SIKDAKKSVMNISTSKTITRVNRPSPLDFFNDPYFKQFFDFDFPQRRGGNDKEVVSS
LGSQVGIISQDGYIVTNNHVDDADTISVSLPGSDTEYKAKLIGKDPKTDLAVIKIEAN
NLWAITFTNSDDLMEGDVVFALGNPFGVGFVSTSGIISALNKDNIQLNQYENFIQTDA
SINPGNSGGALVDSRGLVGINSAILSRGGGNGIGFAIPSNMVKDIKAKLIEKGRID
RGFLGVTISALQGDTKKAYKNQDGLITDVQKGSSEAGLKRGLVTKVNDKVIKSP
SDLKNIYIGTLEIGQKIILDYERDGENKRVDFTLKGEKENPKAVQNDLIEGMTLRNLDP
RFKERLQIPKDVNGVFEVSVKDKSRAKDSGFQEGDIIIGVQNEIKNLKDLEQALKQV
KKKEFTKIWVYRNGFATLLILK"
sig_peptide complement(27532..27582)
/gene="htrA"
/locus_tag="DMACINML_00287"
/inference="ab initio prediction:SignalP:4.1"
/note="predicted cleavage at residue 17"
gene 27791..28690
/gene="cbpA"
/locus_tag="DMACINML_00288"
CDS 27791..28690
/gene="cbpA"
/locus_tag="DMACINML_00288"
/inference="ab initio prediction:Prodigal:2.6"
/inference="similar to AA sequence:RefSeq:CAL35344.1"
/codon_start=1
/transl_table=11
/product="putative curved-DNA binding protein"
/protein_id="Prokka:DMACINML_00288"
/translation="MNSLYETLGVSKNASADEIKKAYRRLARQYHPDINKEKGAEKFK
KEINAAYEILSDEKKRAQYDQYGDSMFGGQSFHDFSRNAGGVNLDLILKDLFGGGFGG
GSSKGSRFNGFSSKGFNAGFGGFGGFEEDLDSTIELSIPFEKAVTGGEYSFSLQGET
IKFKIPHGIKQGEKLIRNKGKKGRNGTRGDLIVVVKLGESEIYQREDDDLQKVDIS
LKTALFGGKVTVNTLKEKKEATITIPANSKNGQKIRLKGYGQNRKSDIYGDMYLVL
NVVLPNTETLDEKLIEMLKEKLS"
gene 28706..29080
/gene="hspR"
/locus_tag="DMACINML_00289"
CDS 28706..29080
/gene="hspR"
/locus_tag="DMACINML_00289"
/inference="ab initio prediction:Prodigal:2.6"
/inference="similar to AA sequence:RefSeq:CAL35345.1"
/codon_start=1
/transl_table=11
/product="heat shock transcriptional regulator"
/protein_id="Prokka:DMACINML_00289"
/translation="MEHHYDEPVYLISVAKVLSIHPQTLRQYEREGLIEPSRTDGKI
RLYSQRDIDRIKLILRLTRDMGVNLAGVDVILKLNQLHEFENLIDELRLELSKQNP
NASSKAVVKHKNSFDLIFYEKK"
gene 29081..30703
/gene="kefB"
/locus_tag="DMACINML_00290"
CDS 29081..30703
/gene="kefB"

```



```

/locus_tag="DMACINML_00290"
/inference="ab initio prediction:Prodigal:2.6"
/inference="similar to AA sequence:RefSeq:CAL35346.1"
/codon_start=1
/transl_table=11
/product="putative glutathione-regulated potassium-efflux
system protein"
/protein_id="Prokka:DMACINML_00290"
/translation="MGNFLEIFLITAAIAIVLNIVFKKFEIPTIIGYIAAGEIISEIY
HLSGKGEIAHIAEFGIVFLMFTIGLEFSFKHLMAMKQEVFLNGSLQMLTCGFVFMFLA
IGILGLGDKSATIVGFALALSSTAVVLKILNDNGDINEQYGRKALGILLFQDIAVIPL
LLLVDFFSSNNQNIQQLLLTLLSAAILIALFFIGKYLVDRIFRLLIIRASSQEIFIS
TILFMVIGASFLAHYFGFSYSLGAFIAGALIAETKYKHKIEADLIPFRDLLGLFFIT
VGMQIQPSIVAQNWFIIICVLTLLIMGLKFGIVCGFLFLYTKRVALKTAFSIAQVGEF
ALAI FSLLQAKSMLDVETAQILIVSVIITMIITPFVLNNIRKIANVVEDMTLNTNVVQ
QSTHSTLKNHLVIFGYGRLGQEIVQKIKNTGVPYLVLESDLNLVELGISRGENVVFAN
AAQEETLKIANITECAVAIVTITNEAKLEMICQVLASYPKPIDTIIHVNGSLEKMLFS
SIDENIRIVRSEKVIARNLVQEALCRIHKNT"
gene 30713..31045
/locus_tag="DMACINML_00291"
CDS 30713..31045
/locus_tag="DMACINML_00291"
/inference="ab initio prediction:Prodigal:2.6"
/inference="similar to AA sequence:RefSeq:CAL35347.1"
/note="hypothetical protein Cj1232"
/codon_start=1
/transl_table=11
/product="hypothetical protein"
/protein_id="Prokka:DMACINML_00291"
/translation="MAKIDEKTLRVKYLRALEKFANAAISALKKENFDKEKFQERMEK
NKKIVEKCEAVNLNSSYNKTLNFVNNCLDFSKQKEELLSLANALDKLKKGEKKEKHK
TYLKDYD"
gene 31038..31658
/locus_tag="DMACINML_00292"
CDS 31038..31658
/locus_tag="DMACINML_00292"
/inference="ab initio prediction:Prodigal:2.6"
/inference="similar to AA sequence:RefSeq:CAL35348.1"
/codon_start=1
/transl_table=11
/product="putative HAD-superfamily hydrolase"
/protein_id="Prokka:DMACINML_00292"
/translation="MINVFFDMDGTLIDSANAISCAVNEIRNELNLSPLSREKIMQTI
NTPNVDWAKELYSIDNFHSSFKDGFKEYFIKHYESVVLFEGIKDILEFLKEQNCFL
AIATNAPQSSLSSILKKHEIIPYFDKILGVSLGIEPKPHPMMLDLLKSEAPHKTSIFI
GDSQKDRECAKNANMPYFHAKWYQKDLQENEFNSASELKNFLERYL"
gene 31712..33706
/gene="glyS"
/locus_tag="DMACINML_00293"
CDS 31712..33706
/gene="glyS"
/locus_tag="DMACINML_00293"
/EC_number="6.1.1.14"
/inference="ab initio prediction:Prodigal:2.6"

```

```

/inference="similar to AA sequence:RefSeq:CAL35349.1"
/codon_start=1
/transl_table=11
/product="glycyl-tRNA synthetase beta chain"
/protein_id="Prokka:DMACINML_00293"
/translation="MSELLIEIGTEELPAIPLLKELANIEKKWKDVLVEDYRLVSDFKF
YYTPRRLVIFHENFASKQEDSFAEFIGAPKNVAYKEGQLSAAGQSFLQKAGISESELS
FKEIKGKEVLYHQKAIKGLQSQEVLGEMIHQFLKSLNFGKSMRWGANSFEFIRAIRSI
VCILDDNLVEFESYGVKSAKKTFVHRSVSYDLQEFNNAKEYFSLLEKNHIILDPLQRK
ERILKQFKLLESQNNIQIGEDEELLAEVIAITEYPNALLGSFEEYQLQIPSEVIITSM
RENQRYFAVFNKGLSNHFIVVSNVAVCEDYSKIIHGNERVLRARLSDAMFFYQNDLQS
GLNPEKLAKMTYLEGLGTMQDKSLREIKIAEVLQMLNNDKIANISTAICYAKADLAT
QMVYEFSDLQIGMGSYYAQKMGLDYEICLAIKEQYLPNSEQAPLPSTEFSSIVALANK
LDTLIGLFSIGKIPSGTKDPYALRRAANGIICKIALNLNKEFDIQALLEKLASHYKNFD
MQILKDFIFERLYTFYSVNASFIKAVLSSKNTDLIHINQSVKALIELSKKANFQENFT
TFKRLANIANKTSHKVDENLFIEEAENKLYKAFKEKIQAHSLQEKLENLFSLKPFIDE
FFDKVMINAEDEKLKNNRQALIYEIYEFLKIADLKELSL"
gene 33703..34524
/locus_tag="DMACINML_00294"
CDS 33703..34524
/locus_tag="DMACINML_00294"
/inference="ab initio prediction:Prodigal:2.6"
/inference="similar to AA sequence:RefSeq:CAL35350.1"
/codon_start=1
/transl_table=11
/product="putative peptidase M23 family protein"
/protein_id="Prokka:DMACINML_00294"
/translation="MKAFWLFSLALWLFQAQNFELIKGQALFLELDKKDFISLKNED
KILATFPHPKNQEKILAIIFSLPYKNPPQNTKLIALLYKNKKEEIFIKTLEGNYKSEKLS
VENKKIFPPKAVKERIAKEFKEANAIYSSYTPKALFDGSFNTPLDSFITSDFGKARTF
NEKVASYHSGTDFRAAVGTPIYAANSIVKIAKDRYFAGKSVVIDHGFGIYSQYYHLS
KIEVKVGQRIKKGDFLGLSGATGRVSGPHLHFGILAGGKQVDPLDFISKFNTLFQ"
gene 34521..35471
/locus_tag="DMACINML_00295"
CDS 34521..35471
/locus_tag="DMACINML_00295"
/inference="ab initio prediction:Prodigal:2.6"
/inference="similar to AA sequence:RefSeq:CAL35351.1"
/note="conserved hypothetical protein Cj1236"
/codon_start=1
/transl_table=11
/product="hypothetical protein"
/protein_id="Prokka:DMACINML_00295"
/translation="MKFSEFFHTWLHESYKNAVSIKNGDFFTAHSVGNLFGTLLAK
HFLDLIDKKVLFPLELVEIGANEGYLSRDFLAALLEFRPEIFSKLSYFIIPEHEKLR
NLQKKTLEGVEFTHKRSLEKCHFENAFFFCNELFDSFACELIDDDKMAFVQDFKLVFE
PMKAKLKEKCEILNLKKGELSLELEEFFKDLKASKKFIASFVDYGVFNPEQFSIRIY
QKHEVFNPFITLKDFFGKSDLTYNVNFTQIQQLIKEHDFKLLALKKQNALIDFGFE
ELLKYTKDKNLKTYENFLSQSKILFFNFDEKHFHFEFAKF"
gene complement(35543..36508)
/locus_tag="DMACINML_00296"
CDS complement(35543..36508)
/locus_tag="DMACINML_00296"
/inference="ab initio prediction:Prodigal:2.6"

```

```

/inference="similar to AA sequence:RefSeq:CAL35352.1"
/codon_start=1
/transl_table=11
/product="putative phosphatase"
/protein_id="Prokka:DMACINML_00296"
/translation="MLGIDLGSNTLRAVFINKEFEKLDEYEFIIGSAKNLTKGKISD
EAIEKLRNALQEIAKKYDLSQAKAAATAAFRKASNTSEIFTRLKQEFQIDFKVIDAKS
EAKISVLGMKMGLNLGLNLDCGYCDLGGASCEFSFRENFSFDFGIISFYEKCKIKR
SVNSFSFKKILQKYPDFPYKFKDKKLIHFLIHDNFKTMAFEAFKQSNELKKMLKQS
KMKNIVLNSGVPTALAALKKGLNYEKYNAKKINGSRLNVNDFLNFQRLWHMDEKRAS
FWVGNTRKNYL VAGCFLLFSIFEREKLIVIDEGLREGLCMADLNF"
gene 36564..37337
      /gene="pdxJ"
      /locus_tag="DMACINML_00297"
CDS   36564..37337
      /gene="pdxJ"
      /locus_tag="DMACINML_00297"
      /inference="ab initio prediction:Prodigal:2.6"
      /inference="similar to AA sequence:RefSeq:EAQ72683.1"
      /codon_start=1
      /transl_table=11
      /product="pyridoxal phosphate biosynthetic protein PdxJ"
      /protein_id="Prokka:DMACINML_00297"
      /translation="MLLGVNIDHIAVLRQARMVNDPDLLEAAFIAAKFGDQITLHVRE
DRRHAQDFDLENIIRFCKSPINLECALNDEILNLALKLKPHRITLVPEKREELTTEGG
LNLNHDKIKESIEKLQNAEIEVSLFINPSLEDIQKSYELKADFIELHTGHYANLHNAL
FSNISHTTFALKEFDLSKKILQNQFEEELSNIEICAKKGVLEGLKVAAGHGLNYKNVS
QIVNIKEICELNIGQSIVARSVFVGLQNAILEMKALLQR"
gene 37334..38434
      /gene="pdxA"
      /locus_tag="DMACINML_00298"
CDS   37334..38434
      /gene="pdxA"
      /locus_tag="DMACINML_00298"
      /EC_number="1.1.1.262"
      /inference="ab initio prediction:Prodigal:2.6"
      /inference="similar to AA sequence:RefSeq:ABS43783.1"
      /codon_start=1
      /transl_table=11
      /product="4-hydroxythreonine-4-phosphate dehydrogenase"
      /protein_id="Prokka:DMACINML_00298"
      /translation="MKKLAVSIGDINGIGLEILARSHEKLSQICTPYFIIHESLLQKA
LKLLELLNAKIVAFKDAKNYEFTLLKKHNSLEIYSFGLPLNLKVDENFDIKAGEID
AKSGLYSFLSFKAASYFVYKNHAHALLTLPPIHKKAWENAGLEFKGHTDALRFFFKKNA
IMMLGCKELFVGLFSEHIPLAKVSKKITFQNLISIFLKDFYQETRFKKIGLLGFNPHAG
DYGVIIGGKEEELMQKAIAFVNAFLNSKKDEKFFKKALKDENLQKELLLNFNTKGVYLP
YPLVADTAFTKANLKACNRLIAMYHDLGLAPLKALYFEKSINVSLNLPPIIRVSVDHGT
AFDKAYKNAKISTKSYFEAAKFALELPSKASI"
gene complement(38418..39023)
      /locus_tag="DMACINML_00299"
CDS   complement(38418..39023)
      /locus_tag="DMACINML_00299"
      /inference="ab initio prediction:Prodigal:2.6"
      /inference="similar to AA sequence:RefSeq:ASI87753.1"

```

```

/codon_start=1
/transl_table=11
/product="Hypothetical protein"
/protein_id="Prokka:DMACINML_00299"
/translation="MKIILLTILSFLSLWGLSFDELIYKNEVKPSFDCFKVKDNGKND
DELIICNKIGAINFENKKLALMDNIFISLYQELLKNANENIKEDFKLVVKKMFRERK
NCTKATSNDYIQASQDPQSPFVYKTDICIEKTYARAFLELMQKAKKDTQSKERLKQIFN
NQVDRYENLIQMSIQDPIDLEIFIDNLAQEGLIDDNAKLLK"
gene 39271..39582
/locus_tag="DMACINML_00300"
CDS 39271..39582
/locus_tag="DMACINML_00300"
/inference="ab initio prediction:Prodigal:2.6"
/inference="similar to AA sequence:RefSeq:CAL35357.1"
/note="hypothetical protein Cj1242"
/codon_start=1
/transl_table=11
/product="hypothetical protein"
/protein_id="Prokka:DMACINML_00300"
/translation="MVVKDIQTTSSSMFSATTKVKEKSTSADEFQATLNEVKNKEDKE
DKKTSSEFTNEDLDLSAVKEDFKSYAWQKMREDQYKKNEEDLLNKL FATIDAGNTAK
I"
gene 39736..40758
/gene="hemE"
/locus_tag="DMACINML_00301"
CDS 39736..40758
/gene="hemE"
/locus_tag="DMACINML_00301"
/EC_number="4.1.1.37"
/inference="ab initio prediction:Prodigal:2.6"
/inference="similar to AA sequence:RefSeq:CKG95321.1"
/codon_start=1
/transl_table=11
/product="uroporphyrinogen decarboxylase"
/protein_id="Prokka:DMACINML_00301"
/translation="MIFIDACFKKPTPYTPIWMMRQAGRYLPEYMKVRQEAGDFLSLC
KDYKRASEVSLQPVDILGVDAIIFSDILVPLEMGMNLRFEKGEQVVFQTPISTLED
LNKLLDDQNASKKLNYYVDSLKLTREKLP LDKALIGFCGSPWTIATYMIEGSGSKNYAK
CKKMLYQNPPELLHEILNKL TQVLKSYLEEQIKAGANAVQIFDSWASALECDKFFDFSF
KYMLEISDFIKNKYPHIPVILFPKGISGYLDKIDGNFDVFGVDWSTPLDLARDKLSHQ
YTLQGNMEPCRLYDKKAIKQGVENILEIMQNKAHIFNLGHGILPDIPVENAKYFIQLV
QESSAK"
gene 40755..41657
/locus_tag="DMACINML_00302"
CDS 40755..41657
/locus_tag="DMACINML_00302"
/inference="ab initio prediction:Prodigal:2.6"
/inference="similar to AA sequence:RefSeq:CAL35359.1"
/codon_start=1
/transl_table=11
/product="putative radical SAM domain protein"
/protein_id="Prokka:DMACINML_00302"
/translation="MKILFGPINSRRFRSLGIDLSPSKKQCNFDCVYCELEAQKPQA
KQDEIVSVEEIIILEVQSALAKNILFDLTLTANGEPSLYPHLDKLISLRLKIAKDKKL

```

```

LILSNGTAVLDQDKFNTLLKLDVVKFSLDSAISKTFYRIDRALKNIDLEKMIKKMAEF
KTQFKGDLVMEILVVKDLNDNEEFIALNQALAKIAPLRVDLSTIDRPPAYAVKKISE
ERLLELSKLITSTPVL LPKRHYEGEKLNFGEELLKMLHLRSQSEIDIENKLDKASQV
LLDKLIKEEKVKILNLAGVKFYKA"
gene      complement(41654..42847)
          /locus_tag="DMACINML_00303"
CDS       complement(41654..42847)
          /locus_tag="DMACINML_00303"
          /inference="ab initio prediction:Prodigal:2.6"
          /inference="similar to AA sequence:RefSeq:CAL35360.1"
          /codon_start=1
          /transl_table=11
          /product="putative membrane protein"
          /protein_id="Prokka:DMACINML_00303"
          /translation="MLLVWIIIFINIIAFLSIDFARIHESFEQIKLAFFASIFILSL
TLIFFLFWQKRALAKKDQKILLIKNEFIHSKEIDIETSLDLIREKIAHLNQDLFKISH
EKETYAKLLEDQSLYQIGNIEGVVRCLEEEASREIKSLVLNALKHQEQIRLGLNQAL
EYHKSIGVAQGNVLQFEASAAIVSDDELESFLLANLLSYFGIENTIFKSLSFINDFH
VVFIDKILEQSSKADDFIVFGRSKNLYEYFLSLPFKEKLELETILQRKLDKICVLK
FQTPYQNNVLLFKQNEFDATLFFNIIKQCSQNMVNSFSELKKEKKEAYRLVLLDY
ELIKFDLEQMRISLSAYKKQHPQSHIIFFSKERVDFDCVSEVLNDISRNDLIALIRK
YLPKN"
gene      complement(42849..44663)
          /gene="uvrC"
          /locus_tag="DMACINML_00304"
CDS       complement(42849..44663)
          /gene="uvrC"
          /locus_tag="DMACINML_00304"
          /inference="ab initio prediction:Prodigal:2.6"
          /inference="similar to AA sequence:RefSeq:CAL35361.1"
          /codon_start=1
          /transl_table=11
          /product="excinuclease ABC subunit C"
          /protein_id="Prokka:DMACINML_00304"
          /translation="MTEILLKNTLKEELQTLPSNAGVYQYFNAEGKLLYVGKAKNLKN
RVRSYFAFTPNLHANPKNSLRIQMIEEAVHLEFITTNSEADALILENSFIKQLHPKY
NILLRDDKTYPIYVDFNEEFPRFEITRKLKVKKSKIKYFGPFFKGARELLDALYLYPE
LKQKASCKSPCIFYQISRCLAPCDKKITQEEYRLILDKAINALLSPSILVKNLEKQMF
HLAQNENYEEAAKIRDQIATIRDLEIKVEIDIAKLEDFEIFALACESSMLSTLRFVQ
NGKIISANSKITPLKNNDFDKNEIYKQLILENFSIDIPLVTNTIYVYEEFEDRELLE
EILSQRFDKKISIKVPIGKRRICDLAFQNAQLNIQKEQKNSDFNIQKELKNYFELE
NLPNYIEVFDNSHMVGQVANVGAMVAYKMGAWDKSNYRKFLKYKNDYEQMREVLTRRA
LDFDKMPAPDLWLIDGGKALLDLAKEIILSSGANVDILAISKEKIDAKAHRKGGAKD
KIHSLKGEFALSINDKQLQFLQKL RDEAHRFAISFHQNTKKKQDLSSSKLAKLGLSSG
IIQKLLAYYGSFEAIYEANFEELRQLVGKKSQAQKIKED"
gene      complement(44656..45132)
          /locus_tag="DMACINML_00305"
CDS       complement(44656..45132)
          /locus_tag="DMACINML_00305"
          /inference="ab initio prediction:Prodigal:2.6"
          /inference="similar to AA sequence:RefSeq:CAL35362.1"
          /note="hypothetical protein Cj1247c"
          /codon_start=1
          /transl_table=11

```

```

/product="hypothetical protein"
/protein_id="Prokka:DMACINML_00305"
/translation="MEKFQSPKIIKNTSAILNDLMSKSHYRPLKTLFFCKDFLNSFPP
AKQRLIARIYIKNHILNIVTLNSAAYQELNHDNSKIYIKVLIKKYGKMYPLSGFSDIK
DLKIFTQKYNNTIKNNENFTAkkPYIELSLGKFENKIENKILAKKFEEIRQMIKND"
gene 45269..46804
/gene="guaA"
CDS /locus_tag="DMACINML_00306"
45269..46804
/gene="guaA"
/locus_tag="DMACINML_00306"
/EC_number="6.3.5.2"
/inference="ab initio prediction:Prodigal:2.6"
/inference="similar to AA sequence:RefSeq:CAL35363.1"
/codon_start=1
/transl_table=11
/product="GMP synthase (glutamine-hydrolyzing)"
/protein_id="Prokka:DMACINML_00306"
/translation="MKKADILVLDFGSQYTLIARRLREQGVYAEILPFNVSLADIKA
KEPKGIILSGGPASVYATDAYFCDKEVFNGLPILGICYGMQLMAHHYKANVAPAGHK
EYKASIEIQKSDLFKKNLPPKQIVWMSHSDKVENLPQGFVSLATSENSPYCVFANEE
KKFFALQFHPEVQHSEFGKSILKNFAKYACNCESIWNMGSAKTQAEKIREEVGNDKV
LCAVSGGVDSSVVAALLANAIKDQVIVFVDNGLLRSGEKEQVEFMFKNTLGINLISI
DASKIFLDRLAGVTDPEQKRKIIGNTFIEVFEEEAKKHKDVKFLAQGTLYTDIIESSV
IGASKTIKSHHNVGGLPEKMNLKLVPLKEIFKDEVRALGIELGLSKEIVYRHPFPGP
GLAIRIMGEVNRPSLELLRKADVILLEELRSTGWYDKTWQAFVLLNVKSVGVMGDNR
TYDNTVCVRVVDASDGMTATFSHIPYEILENISRRIINEVEGINRVVYDISSKPPATI
EWE"
gene 46986..47594
/gene="cfa_1"
CDS /locus_tag="DMACINML_00307"
46986..47594
/gene="cfa_1"
/locus_tag="DMACINML_00307"
/EC_number="2.1.1.79"
/inference="ab initio prediction:Prodigal:2.6"
/inference="similar to AA sequence:RefSeq:CAL35298.1"
/codon_start=1
/transl_table=11
/product="cyclopropane-fatty-acyl-phospholipid synthase"
/protein_id="Prokka:DMACINML_00307"
/translation="MENSIKDSYNKICKKWSDFRKSTSTNKCIIDFANDLKSNSRVLD
IGCGTGYPIASYLSKQGFQVTGIDISEMIKQAQKLNHLNATFLVENILNFKTDKKYD
AIIAFDSIWHISHDKQECIYQIISLLTPGGLFLFTHGKNDGEIISTMWGESFYHSAL
DLEKVHLLKQNGFDILSSIYIEETTGDRELLIIAKKEL"
gene complement(47740..48297)
/gene="rsmA"
CDS /locus_tag="DMACINML_00308"
complement(47740..48297)
/gene="rsmA"
/locus_tag="DMACINML_00308"
/EC_number="2.1.1.-"
/inference="ab initio prediction:Prodigal:2.6"
/inference="protein motif:HAMAP:MF_00607"

```

```

/codon_start=1
/transl_table=11
/product="Ribosomal RNA small subunit methyltransferase A"
/protein_id="Prokka:DMACINML_00308"
/translation="MFFYEYLNPKQIGAFCSQQKLGFMVTQINLRQADYIVEIGP
GTGVFTENILKYKNKKAQFFAIEINKNMAEKLKRKIANLDIEIGSAENLPYFLRQRSI
ANADVIVSGIPWSLLKDHEQEKLKIIHKSLKPNGYFSTFAYVLPFSSLKFRQKIFS
FFSEVRISRVVWQNFPPAVVYCKK"
gene 48431..49891
/locus_tag="DMACINML_00309"
CDS 48431..49891
/locus_tag="DMACINML_00309"
/inference="ab initio prediction:Prodigal:2.6"
/inference="similar to AA sequence:RefSeq:CAL35364.1"
/note="hypothetical protein Cj1249"
/codon_start=1
/transl_table=11
/product="hypothetical protein"
/protein_id="Prokka:DMACINML_00309"
/translation="MHGKIAIYMDSTGRGTVTNSANTFFDFSRQIWNDDKSMPSVGML
VEFRTLSSDKKAENGAPAPVSKTITGIKPSKFQEFKEGDFITEHDFWKTDSDELEDL
QNSRRSAYITELYRSIDFDSIEKIPLSFTIPQAIQKYFAHEILSVEALQANLQDEKDI
PCILDYLILKRFLFKAYDTLIFMDNSIDQTQFSALKSIMMHLSENSYQMIADKKPNIT
KIFNETFLSLQCHYQALIATIDTRKNRLASLEAQMKALQSEIQLKSNAANTDPEKLKA
RQEKLAKLQKEAEYRRTLKRLGAIQEDFYKKNYNIFENAFKLSREKLFKKIITGLNL
CATIMDVKIWHLSLKSSGVKNSYFTMSNIENSFCSLSFAEHYLSRLNKAALNPFQKLL
LVYIQKITKEQRKKFLVVTSDLDLLCKLKIETFAQNPYFIVKYAPKKNVYQSLMRDNS
FDIVFIDEKHVWESVADIILEGKHFDFKIGKTKFKLI"
gene 50132..51382
/locus_tag="DMACINML_00310"
/locus_tag="DMACINML_00310"
/EC_number="6.3.4.13"
/inference="ab initio prediction:Prodigal:2.6"
/inference="similar to AA sequence:RefSeq:CAL35365.1"
/codon_start=1
/transl_table=11
/product="phosphoribosylamine--glycine ligase"
/protein_id="Prokka:DMACINML_00310"
/translation="MKIMILGSGAREYSIALALKRVDENLEFYFAPNGGATESLGTNL
NFKDPVVLATYAKEKDFDLICIVGSESFLAEGIVDIFKQHNIPFIPTKAAAMLETSKS
FMKSFLKKYRIKTAKFLNTNDIEKAKNFILSLTPPIVVKADGLCAGKGVIIAKTHEEA
IEEASKMLSGESFGEAGKLIVIEEFLDGFELSIFAVCDGNDVLLPAAQDHKKLLDGD
EGPNTGGMGAYAPSSLANESLLRKIQKDIIIPTLAGMKKEDSEFCGVLFIGIMVVGNK
PYVLEFNVRFGDPECEVLMPLIENPLELILATTQKRLRHTKIKIKKDYAVGVVCASEN
YPYKSSPKSEISITNIPENTHISYAGVSLEDGKLMADGGRVLCVGTGSSIEEAQKKA
YELCENVHFKGKQFRKDIAHQVIQ"
gene 51379..51831
/locus_tag="DMACINML_00311"
CDS 51379..51831
/locus_tag="DMACINML_00311"
/inference="ab initio prediction:Prodigal:2.6"

```

```

/inference="similar to AA sequence:RefSeq:CAL35366.1"
/note="conserved hypothetical protein Cj1251"
/codon_start=1
/transl_table=11
/product="hypothetical protein"
/protein_id="Prokka:DMACINML_00311"
/translation="MKEDLLTRLERENLTIASFNKRI LAYFIDNLVLSLIVFVIFYDK
LLNAKDLFDTAQILGDFYLGFLLLHITYQTIFTYLYGASLGKMVCKIIILDEDLLDKP
NLNQSCIRSIVRQISDMAFMLGFAWALSNDLRKRWEDYLARTIVVNA"
gene 51821..53869
/locus_tag="DMACINML_00312"
CDS 51821..53869
/locus_tag="DMACINML_00312"
/inference="ab initio prediction:Prodigal:2.6"
/inference="similar to AA sequence:RefSeq:ADT66527.1"
/codon_start=1
/transl_table=11
/product="organic solvent tolerance protein, putative"
/protein_id="Prokka:DMACINML_00312"
/translation="MWRKILFLSASLTLDDAAQVDIYALDAKKQGDILTANEDVVIFS
DFYFITANKAIYNEKTGDLELFGDVNILRGQNERSHSNYAKINLNSNKANFNFFFSN
NNLEVWFQSKTSYLDENIFKSEISAVSSCNVEDPDWEIRFSEGWLNRENNFVHLYNAK
LYVKDFPVFYLPHYFGFSADTHRQSGLLIPKIVLKNSEGLYYEQPIYIAPYENWDLELN
PQIRTNRFGFLYSTLRFVDSPYSMGEVNLGAFRENSSYHDENLKNQSHYGAELKYAR
NDLIKTLGDNFQEGLWVDATYLNIDYLNLSRDRYDLNSLVTSKINYFLADENNY
GAYAKYYIDTSALNNDNTLQEYPSFYHRFLNFFDERLRYSFDA SFHNFYRPVGPYA
NQLNLPISYHNAFFDDFLHFTFTERFYASFLNYSHYPEKEHEHYFRNTHDFNLTYD
LSKAYDNFFHTLNFGLGYILPGAKSGSISEDYLEESNKEEEHFGLYTTQYFYNNEGQK
KIKHRLNIDYLNKQGSFDEISNLLSYNNNINISFNSEIVYSDLQDRFTNIISQMEIKP
NSKFNWSFSHAYQNDEYKYSFIGTRANYLASANYHLFGGIWFDTRAHANMWELGYT
FQRKCWNYSMLYRERIDPQLTSAGITAKNQSGIYFIFNFYPLGGVKYDFSLAETESKI
"
gene 53886..56102
/locus_tag="DMACINML_00313"
CDS 53886..56102
/locus_tag="DMACINML_00313"
/inference="ab initio prediction:Prodigal:2.6"
/inference="similar to AA sequence:RefSeq:AGQ94461.1"
/codon_start=1
/transl_table=11
/product="polynucleotide phosphorylase"
/protein_id="Prokka:DMACINML_00313"
/translation="MLNIFKSLTNLLYGKKGQIMQYSIEINGNLEVFIDIEKVAKQAAG
AVLMRQGKSVVLATVAREEKPEEDFLPLTVQYIEKAYAAGKIPGGYVKRETKPSDAE
TLTARIIDRSLRPLFPKGYAYPTQIVVMVLSADPQVDLQVMSLNAASVALYLSDIPMK
APVCGVRIGRIEEKFVLNPNNEELKNSTLDLYVAGVKDELLMIEMRALPNQKEDEIFI
EAPYADVLTQTTSQSMNELSEDEILEALSQAQKAILNGSNAYEEAFLKHKKSSDLNFK
DEIENFELLAFIENNFHDQIAQAINQMAKSERASELNKIAEKILNFESATKWDEESIL
NALAKVKHKIVRSQILNKKRADGRNLNEVRPITIETNLPNAHGSCLFTRGQTQALV
VATLGSENDAQMVDVLEKNPNERFMVNYNFPGFVGEASPIKAPGRRELGHGNLAK
RALYPSIDENYPYVIRLVSEILENSGSSMATVCGGSLALRAAGVPSLKL VAGVAMGL
IFEGDQYAILTDIMGLEDHGDMDFKVAGSKDGITALQMDIKLGGIDQKILKEALYQA
KEGRIHILNIMEEALKEIVNNEEVLPKLELFNVDPSKIVDIIGQAGKTIKEIIEKFGV
SIDLDREKGEVKIAGNENEQIKAAKDYIINITSSQKNNKRGFKEKDLSDFEIGEEFEG

```



gene KVKKITNFGAFIELKNGIDGLLHNSKSKNLNLSNQILKVKVSEIKNGKISVDLCE"  
 56099..56581  
 /locus\_tag="DMACINML\_00314"  
 CDS 56099..56581  
 /locus\_tag="DMACINML\_00314"  
 /inference="ab initio prediction:Prodigal:2.6"  
 /inference="similar to AA sequence:RefSeq:CAL35369.1"  
 /note="hypothetical protein Cj1254"  
 /codon\_start=1  
 /transl\_table=11  
 /product="hypothetical protein"  
 /protein\_id="Prokka:DMACINML\_00314"  
 /translation="MSEFLTHPKPFDFDKSKILILGSFSPVKSREDGFYYQHPRNRF  
 WPILETLDTRLENITKQAFLEKKNIALWDVLQSCIKNSDDKTISYAKANDLNLIL  
 SQAQIQAIFFTGKSAYQFFTKFPHLKAIALPSSSPANLNFSEQLLQSYKIIKNFIK  
 "

gene complement(56519..56788)  
 /locus\_tag="DMACINML\_00315"  
 CDS complement(56519..56788)  
 /locus\_tag="DMACINML\_00315"  
 /inference="ab initio prediction:Prodigal:2.6"  
 /codon\_start=1  
 /transl\_table=11  
 /product="hypothetical protein"  
 /protein\_id="Prokka:DMACINML\_00315"  
 /translation="MFDFFINYMIFCAKDL SKLFLGLTALFLFVFFGIMFFICEGVFL  
 YVLLFCEIILFLYMLLGIFYIRNQKLFYKIFNYFIALQKLFKRKI"

gene 57179..57388  
 /locus\_tag="DMACINML\_00316"  
 CDS 57179..57388  
 /locus\_tag="DMACINML\_00316"  
 /inference="ab initio prediction:Prodigal:2.6"  
 /inference="similar to AA sequence:RefSeq:CAL35370.1"  
 /codon\_start=1  
 /transl\_table=11  
 /product="putative isomerase"  
 /protein\_id="Prokka:DMACINML\_00316"  
 /translation="MPFVNIRITKENGEPTNEQKQELIAGVTDLLARVLNKNKASTVV  
 IIDEIDTDNYGLGGKSITQVRKEKS"

gene complement(57385..58041)  
 /locus\_tag="DMACINML\_00317"  
 CDS complement(57385..58041)  
 /locus\_tag="DMACINML\_00317"  
 /inference="ab initio prediction:Prodigal:2.6"  
 /inference="similar to AA sequence:RefSeq:CAL35371.1"  
 /codon\_start=1  
 /transl\_table=11  
 /product="putative membrane protein"  
 /protein\_id="Prokka:DMACINML\_00317"  
 /translation="MELILLSLIVILLVFVVIKQFKNSSKTEEKDIHISNDITQLKSI  
 GELSVFQVFSKEIVTKKDSAFNGIWKSI LGWLSERQIALIFEFEITFLYDLRDKNFE  
 IVLDNDHYKIIMPECKYKHSIIDMKFYDEKNAKFLPFLLPDSINSTGLSFSSENDKNK  
 LIREAKEEVKELSLNLIRNLESKIHKSARDTLEAIAKFGGAKKVEFEFKDNTQKLDIN  
 "

gene complement(58059..59243)  
/locus\_tag="DMACINML\_00318"

CDS complement(58059..59243)  
/locus\_tag="DMACINML\_00318"  
/inference="ab initio prediction:Prodigal:2.6"  
/inference="similar to AA sequence:RefSeq:CAL35372.1"  
/codon\_start=1  
/transl\_table=11  
/product="putative efflux pump"  
/protein\_id="Prokka:DMACINML\_00318"  
/translation="MENFNRTLWVCWFGVFTTSMGLSQAIPILPLYIKELGHTNTSEI  
AFYSGLAFGITPLGMAIFSPLWAYLGAKYGYKNMLLRASLGMSALTLWLSFAHDAMEV  
VLIRGLTGIVSGFTAAAVVFI AVIAPKEKVAYALGTLSTASISGSLGLPFGGVVAEI  
FSISAVFDLVAFLLACSFVTIFL FIRERKIQKEAKKNTQEFKENKKLIVIIIFITTFII  
QFGTFGVMPILSLYVEQIYQGGNLALWAGVVVAASGISNLFAPKLGKIADKIGPSKI  
IFGALIFCGICFYLQSLATNVYALIFVRL LIGIGLGGLLPCVNALLKKGVSANKLSLV  
FGFNQTCQFLGNFCGAFGGGLITAHFSVELVFAFICCIFILNAIIFLIFERNYIFSNQ  
GL"

gene 59297..59752  
/locus\_tag="DMACINML\_00319"

CDS 59297..59752  
/locus\_tag="DMACINML\_00319"  
/EC\_number="3.1.3.48"  
/inference="ab initio prediction:Prodigal:2.6"  
/inference="similar to AA sequence:RefSeq:CAL35373.1"  
/codon\_start=1  
/transl\_table=11  
/product="putative phosphotyrosine protein phosphatase"  
/protein\_id="Prokka:DMACINML\_00319"  
/translation="MKKIVFVCLGNICRSPMAEFVMKDLIKKANLEKEFFVTSAGTSG  
EHDGENMHYGTQNKLSLDIKYQNFTSKKL TQVLCDESDFLITMDNSNFKNVQKNYKN  
IQNKLLKITDFASHLGYDEVPDPWYSGNFDETYQIISLACKNLLNHLQK"

gene complement(59754..60623)  
/locus\_tag="DMACINML\_00320"

CDS complement(59754..60623)  
/locus\_tag="DMACINML\_00320"  
/inference="ab initio prediction:Prodigal:2.6"  
/inference="similar to AA sequence:RefSeq:CAL34746.1"  
/note="hypothetical protein Cj0600"  
/codon\_start=1  
/transl\_table=11  
/product="hypothetical protein"  
/protein\_id="Prokka:DMACINML\_00320"  
/translation="MLVSPIEKIQFQGF EFYIKRDDLLGEINGNKARKLAFYLSQNYD  
QGQRFISYGGIQGNALVALSIFATKRNLILVYACEKIPTYLRNSPCGNYKLALENNVY  
FIENHSNKDLKTFALSLCEKDDIFIEQGVANLNAELGYIQLAKEIESQSKTLGLDFDI  
FLPSGTGTSAAFLAKNSKFKVFTCACVGDEYYLKTQILNLKKNYDFSLEILKSDKKY  
HFGKPYLEFYQLYKDLKQECLVEFDLLYDMLGLSIALKREWKNPLLYIHQGGISGNSS  
MLERYIFKYCKDK"

gene complement(60633..61583)  
/locus\_tag="DMACINML\_00321"

CDS complement(60633..61583)  
/locus\_tag="DMACINML\_00321"  
/inference="ab initio prediction:Prodigal:2.6"

```

/inference="similar to AA sequence:RefSeq:CAL34745.1"
/codon_start=1
/transl_table=11
/product="putative OmpA family membrane protein"
/protein_id="Prokka:DMACINML_00321"
/translation="MKNEQEEGNFWIAYADLMAGLLFVFIILLIGAIIVVKYVLTQSDLR
EIKDNLNKQEARLEESKEELRNKEAIVFKLSSDLNNASSALNLIINSQKAELEANITNY
EQLSKELNSSIDSKDKQILILLGQLEKKDEEIRNLQESFDKAKEKQNLSLIRENLSK
ELQAKLDSNITIDQKTGSISLPSEVLFDKDSYTLKNEAKASLRKILSEYFNAIINDPK
ILSNIEIIIEGHTSDSGSYIYNLDSLQKRAYEVMNFIYTFYKDTRLQKLLMASGRSF
SDPVLVNGVEDKDKSRRIEIKFSIKNDNALKDVEKFFEFR"
gene complement(61580..63034)
/locus_tag="DMACINML_00322"
CDS complement(61580..63034)
/locus_tag="DMACINML_00322"
/inference="ab initio prediction:Prodigal:2.6"
/inference="similar to AA sequence:RefSeq:SQE24126.1"
/codon_start=1
/transl_table=11
/product="membrane protein"
/protein_id="Prokka:DMACINML_00322"
/translation="MDIRSDEISELILPESKEKGYLVYKIIIFIPALLYVFIILLGYY
NIINFKVELHTVVMIGFIFFTALVFARHSSEYAYSIFEQQKDEFKQALKRHIMKHFLT
IGKDTKSNASFDFFAYAYVKGSRNENFASIGAAIFPMMGILGTFISIALSMPNFSSSD
TAALEQEIALLLSGVGTAFYVSIYGIFLALWMMFFEKFGKSKIERLLNRQKNSTSGFF
WTKEELDQRYLSESLQHFEEKIGAIKQVSNQDFFAELDHTIDRKFGIFQDMLNVEEKA
IRLSGEHIKQTMGELSRAQRDQRDLGKMYGEMNLGIGMLNQLKEINMRMSEQYNRL
DISNEKIQHFDKTLAFDEKVDKDFGKNFELYEKAILESQEKVFEFGKTSLFEGMHKFK
EYEEEEKSIDAKIKMMDKLGKQEIKNLNEETNEVMAKIGKTPSLTQEEQDNIENEILSS
EKITENTEQTKEIQNDSDTLDSNKNFNKEEKEDK"
gene complement(63133..64197)
/locus_tag="DMACINML_00323"
CDS complement(63133..64197)
/locus_tag="DMACINML_00323"
/EC_number="4.1.2.13"
/inference="ab initio prediction:Prodigal:2.6"
/inference="similar to AA sequence:RefSeq:APA79036.1"
/codon_start=1
/transl_table=11
/product="Fructose-bisphosphate aldolase class II"
/protein_id="Prokka:DMACINML_00323"
/translation="MGLLDIVKAGVVSDELNKVYEYAKTQGFaipavnnvvgtdsina
VLEAAKKNVSPVIIQFSNGGAKFYAGKNCPQGDVLGAIISGAKHVHLLAKAYGIPVILH
TDHAARKLLPWIDGLIEANA EYKKT HGQALFSSHMLDLSEEDLEDNLSTCETYLKKLD
SLGISLELELGCTGGEEGDVNTGIDNSKLYTQPEDVALAYERLGKISDKFSIAASFG
NVHGVYKPGNVS LQPEILKNSQK FVKEKFGLEADKPINFV FHGGSGSELKDIKDAVSY
GVVKMNIDTDTQWAFWDGVREYEAKNRAYLQGGQIGNPEGDDKPNKYYDPRVWLRSGE
ESMIKRLELAFEDLNCIGRN"
gene complement(64197..65018)
/gene="peb4-cbf2"
/locus_tag="DMACINML_00324"
CDS complement(64197..65018)
/gene="peb4-cbf2"
/locus_tag="DMACINML_00324"

```

```

/inference="ab initio prediction:Prodigal:2.6"
/inference="similar to AA sequence:RefSeq:CAL34742.1"
/codon_start=1
/transl_table=11
/product="major antigenic peptide PEB-cell binding factor"
/protein_id="Prokka:DMACINML_00324"
/translation="MRKVSLIAAALIAGVALNLNAATIATVNGKNISDTEVSEFFAPM
LRGEDFKSLPDHQKNALLQQYIMQDLILQDAKKQNLEKDPLYKKELEKAKDSILINVY
QEKILNSIKIDSSKVKAFYEQNKEKYIKPAAVQAKHILVSSEEEAKDIIKELKGLKGGK
ALDDKFSQLAKEKSIDPGSKNQGGELGWFDQSTMVKPFTDAAFALKNGTITTTVPKTN
FGYHVILKENSRAKEQIKFDDVKKGIENGLKFEFFKKVINQKGGQDLLNNAKVEYK"
sig_peptide complement(64953..65018)
/gene="peb4-cbf2"
/locus_tag="DMACINML_00324"
/inference="ab initio prediction:SignalP:4.1"
/note="predicted cleavage at residue 22"
gene 65101..65727
/gene="nth"
/locus_tag="DMACINML_00325"
CDS 65101..65727
/gene="nth"
/locus_tag="DMACINML_00325"
/EC_number="4.2.99.18"
/inference="ab initio prediction:Prodigal:2.6"
/inference="similar to AA sequence:RefSeq:CAL34741.1"
/codon_start=1
/transl_table=11
/product="endonuclease III"
/protein_id="Prokka:DMACINML_00325"
/translation="MKRNSEIKELFLKHFDKPTTELKFSNLYELLVCMLSAQCTDKR
VNLITPELFKAYPDITSLANANLSSLKTYIQSCSFYNNKAQNLIKMAQSVCFENFNAQI
PLEEEKLKSLAGVGQKTAHVVLIEWCGANCMVDTHVFRVSHRGLSKAKTPEATEED
LTRIFKDNLNLYLHQAMVLFGRYVCKAKKPLCKECLNHLCKSKDKELE"
gene 65724..66374
/locus_tag="DMACINML_00326"
CDS 65724..66374
/locus_tag="DMACINML_00326"
/EC_number="3.1.30.-"
/inference="ab initio prediction:Prodigal:2.6"
/inference="similar to AA sequence:RefSeq:CAL34740.1"
/codon_start=1
/transl_table=11
/product="putative DNA/RNA non-specific endonuclease"
/protein_id="Prokka:DMACINML_00326"
/translation="MKFIIIFLLAFTLHVFALEAYKPKDFASYFNPLNCSVLDKFFY
INCYDYKLGTKAVAYKVEASNLKEKQIKKRARFEDDTNIPKKYRSTWSDYKNSGYTR
GHIASNASFRFSKAAQTSVFLMSNITPQNAQVNATVWNEIEQRERSLAFKFQSVEVLN
LILYGKNPKFIKNGIAIPSSYIKIIKTPRFKECYEVPNNDIQSEEINDYKISCNKF"
sig_peptide 65724..65774
/locus_tag="DMACINML_00326"
/inference="ab initio prediction:SignalP:4.1"
/note="predicted cleavage at residue 17"
gene 66384..67016
/locus_tag="DMACINML_00327"

```

CDS 66384..67016  
 /locus\_tag="DMACINML\_00327"  
 /inference="ab initio prediction:Prodigal:2.6"  
 /inference="similar to AA sequence:RefSeq:CAL34739.1"  
 /codon\_start=1  
 /transl\_table=11  
 /product="putative integral membrane protein"  
 /protein\_id="Prokka:DMACINML\_00327"  
 /translation="MEISALTITILYIIGISAEGMTGALAAGRHKMDLFGVIFIALVT  
 AIGGGSIRDVLLGHYPLTWVKHPEYIVLILCALVATKIPRIVSRLESFLTLDAIGL  
 VVFSILGAQIAIEQNHGFIIAISA AVITGVFGGILRDILCMRIPLVFQKEIYAGIAII  
 AGAIYYALMVYLQLHALICTLVTLFVGVTARLLAIKYQWSLPIFSYNEEK"

gene 67094..67312  
 /locus\_tag="DMACINML\_00328"

CDS 67094..67312  
 /locus\_tag="DMACINML\_00328"  
 /inference="ab initio prediction:Prodigal:2.6"  
 /inference="similar to AA sequence:RefSeq:CAL34737.1"  
 /codon\_start=1  
 /transl\_table=11  
 /product="putative lipoprotein"  
 /protein\_id="Prokka:DMACINML\_00328"  
 /translation="MNKAILLTLIGLFFACEQTKSVEYYKAHPPEAKKRSDECRLKS  
 IISQDCVNAHSVAIPKEDWDEGHDTQTR"

gene complement(67316..68020)  
 /locus\_tag="DMACINML\_00329"

CDS complement(67316..68020)  
 /locus\_tag="DMACINML\_00329"  
 /inference="ab initio prediction:Prodigal:2.6"  
 /inference="similar to AA sequence:RefSeq:CAL34736.1"  
 /codon\_start=1  
 /transl\_table=11  
 /product="putative SAM-dependent methyltransferase"  
 /protein\_id="Prokka:DMACINML\_00329"  
 /translation="MKDELFKKLTQKQFEFDKSVASVFDDMINRSVPFYKENLELCAN  
 LIKLTKEGVKVC DLGCSSANFLIFLASLRKDLK LFGVDNAPSMLEIAKSKAQAYGLN  
 IEFLEANL CDFVFFQSDV FVANYTLQFIRPPKRQELVNEIYKNLNKGGIFIMSEKILY  
 EDAFLSKNMIELYADYKERQGYSKIEIAAKREAL ENVLIPYSEKENLDMLKNAGFEKI  
 ESVFKWVNFETFIAFK"

gene complement(68024..68863)  
 /gene="ribF"  
 /locus\_tag="DMACINML\_00330"

CDS complement(68024..68863)  
 /gene="ribF"  
 /locus\_tag="DMACINML\_00330"  
 /EC\_number="2.7.1.26"  
 /inference="ab initio prediction:Prodigal:2.6"  
 /inference="similar to AA sequence:RefSeq:CAL34735.1"  
 /codon\_start=1  
 /transl\_table=11  
 /product="putative riboflavin kinase/FMN  
 adenylyltransferase"  
 /protein\_id="Prokka:DMACINML\_00330"  
 /translation="MLNIFTTTLKNNIKTLAIGCFDGVHLGHKKLIECLDDSGALLII

```

DKFKGKKLCTNQDKAFLAQKEIIEIDFESIKALDGKDFLQALKEEFVNLERIVVGDFD
SFGKNRSYKAKDIEALSGIKTTIIDEFRLGGVGVHASLIKEYLTRGDIKKANCFGRN
YAIKGLIKGQGLGSKELFATLNLECEEYFLPKNGVYASIVSFHDKRYKSVSVFVGRS
SDMQFAIESHIIIEKFDESLAIGEVLLEFVEFLRENQKFNDLAQLKEQISKDINQAKA
CLG"
gene      complement(68829..69578)
          /gene="tlyA"
          /locus_tag="DMACINML_00331"
CDS      complement(68829..69578)
          /gene="tlyA"
          /locus_tag="DMACINML_00331"
          /inference="ab initio prediction:Prodigal:2.6"
          /inference="similar to AA sequence:RefSeq:CAL34734.1"
          /codon_start=1
          /transl_table=11
          /product="putative hemolysin"
          /protein_id="Prokka:DMACINML_00331"
          /translation="MRYDIFVAKRLNLSRNKALELIENEEILLNSKPYKASFDVQNLL
KNKIADQEELLNSKELNLELLGELYVSRAAFKLYFLENHNINIANKTCLDIGSSTGG
FVQILLEHKALKVSALDVGDNQLHPSLRDDKRIEIIENTDLRTFKSEQKDFDITCDVS
FISLTHLLSYIDNLALKDIVLLFKPQFEVKGQAKRDKKGVLKDEKAVFKAMREFENAC
ARLGWILQCCEESKIKGKEGNVEYFYTYTKK"
gene      complement(69575..70579)
          /locus_tag="DMACINML_00332"
CDS      complement(69575..70579)
          /locus_tag="DMACINML_00332"
          /inference="ab initio prediction:Prodigal:2.6"
          /inference="similar to AA sequence:RefSeq:ALW79391.1"
          /codon_start=1
          /transl_table=11
          /product="membrane protein"
          /protein_id="Prokka:DMACINML_00332"
          /translation="MSLLKNNIQLFVLFISIFAFLLFFWQKFAVWSLFLIPIFLAFFLEF
FYFLRLRNKNIKEATMIKNSLIYRVSAGDFYIYLSFFMALFALASLFLNLSFEKQD
GFFLFILLPLFLFFFKQKLQLQFLDNAYNDFRIIILSSLILALLYAIFNGVVNPIQSF
NLEDFNQSIHYKNSKFFVFDLISQILTILINALKEYFLYSLGLFWFRVLFNFIQDFINF
FIFCSFVAYLYNFAFKAKKTYVVFVFFVALASFFIVEDKNQNPKAYQKELVLMNNN
LSFLKEQNL SMLQNDKDRLVKNLQVQELLDKNAFEIGIWWFSKDKEELQKSLNESLQ
"
gene      complement(70560..72503)
          /gene="ligA"
          /locus_tag="DMACINML_00333"
CDS      complement(70560..72503)
          /gene="ligA"
          /locus_tag="DMACINML_00333"
          /EC_number="6.5.1.2"
          /inference="ab initio prediction:Prodigal:2.6"
          /inference="similar to AA sequence:RefSeq:CAL34732.1"
          /codon_start=1
          /transl_table=11
          /product="DNA ligase"
          /protein_id="Prokka:DMACINML_00333"
          /translation="MTKKEYLEKVALAASWMMRAYYEKDEPLASDAEYDTLIRELRAFE
EQNENEISPDSPTQKIAPTIQSEFKLSHLSRMWSMEDVFDESELRAWAKRARCEENF

```

FIEPKFDGASLNLLYDNGRLISGATRGDGEIGEDITLNVLEIDNIPKTINYKEKIEIR  
 GEVILKDDFEKINEKRARLNQSLFANPRNAASGSLRQLDTSITRERNLKFYPWGVGQ  
 NSLEFSKHSEIMSFIRELGFLKDDFVKLCVNLDEVLKAYNELLSLRDKKPMMDGMVV  
 RVDDLALCKELGHTVKFPKMAAFKPALEKTTRLIGVNLQVGRSGVITPVAVLEPVN  
 LDGVIVKSATLHNFDEIARLDAKINDFVSVIRSGDVIPKITKVKERRDGLLELDIARP  
 QFCPTCKSELLDEGTLIKCQNIDCEDRLVNSIIHFVSKKCLNIDGLGESIVELLFKEK  
 KITTLESIFHLKFSDFEGLGFKKINNILNAIEQARDCELFRTALGIEHIGEVA  
 AKKLALSFGKEWHKQSLEAYANLEGFGEQMALSLCEFSRVNSARIDEFYKLLNLKEQK  
 VQIQEDSVIFGKTFVITGTLSRPREEFKNLIESLGGKVSQSVSKKTDYVFLFGQEAGSK  
 LDKAQELGVKCIDENEFNELIEK"

gene complement(72504..73646)  
 /gene="folP"  
 /locus\_tag="DMACINML\_00334"

CDS complement(72504..73646)  
 /gene="folP"  
 /locus\_tag="DMACINML\_00334"  
 /EC\_number="2.5.1.15"  
 /inference="ab initio prediction:Prodigal:2.6"  
 /inference="similar to AA sequence:RefSeq:A0H51600.1"  
 /codon\_start=1  
 /transl\_table=11  
 /product="dihydropteroate synthase"  
 /protein\_id="Prokka:DMACINML\_00334"  
 /translation="MKFFKINPNTDFSLLCSEFINPHKMGQKIMSEKTQIYFILIKDIT  
 TPAANILKQDALRVGAELITHKEVITAKITHSNALLMATKEQIHKLINKEKLQDFGLK  
 NLARFLENDFSKPKQAEMLAVINVNEDSFNADSRVSYKDFEERLNEILALNPEYIDIG  
 AVSSRPKSVYCGKEEEFRRLKNVLDLIYDKNYKKAIFSLDSFDEYCLEYALNKGKFF  
 INDISSLRNLNLAKLASKYNAKYCLMHMQNDPLTMQDDPRYDDLLEDESSFFKEKLEI  
 LDALGVKESILDVGIGFGKSAEHNMILIKHLEHFLQFKKPLLVGASRKSVINAYYESE  
 VKDRLAGTLYLHLKAFENGASIIIRVHDLYEKQLFAMANAMQSIGV"

gene complement(73643..74254)  
 /locus\_tag="DMACINML\_00335"

CDS complement(73643..74254)  
 /locus\_tag="DMACINML\_00335"  
 /inference="ab initio prediction:Prodigal:2.6"  
 /inference="similar to AA sequence:RefSeq:CAL34730.1"  
 /note="hypothetical protein Cj0584"  
 /codon\_start=1  
 /transl\_table=11  
 /product="hypothetical protein"  
 /protein\_id="Prokka:DMACINML\_00335"  
 /translation="MFVSKIIITDDFDGIRAELLKQFHPNSLRFIPKEVASEFLIDDA  
 KAVEKESYIAETSEKIIIVLMANSFRIEAQNFLLKLLLEPPKNIKFLIVVPSKNLLLPT  
 IKSRLICEKRNKIKAKNTLNLELNKMDLKTLEFLQENENLDKAELMEKIALIAEESV  
 KFKDFNADELEFFYESYELAKLNSKSSLILATLLLNYTKNEK"

gene complement(74254..74787)  
 /locus\_tag="DMACINML\_00336"

CDS complement(74254..74787)  
 /locus\_tag="DMACINML\_00336"  
 /inference="ab initio prediction:Prodigal:2.6"  
 /inference="similar to AA sequence:RefSeq:CAL34729.1"  
 /note="hypothetical protein Cj0583"  
 /codon\_start=1  
 /transl\_table=11

```

/product="hypothetical protein"
/protein_id="Prokka:DMACINML_00336"
/translation="MSDFLSFTLENIRNGGTFMAWMESRRLEWAPLMAARLKYLLEGR
TFVLMCDEQRAWYEEYFLANINSKTTTRPMLPFVSLKSLCKKKIQNIEDIALLNLDLID
SFPNGFIYFYIGSASDKKSLIAKSRDSSLWLFDEQLQDSFYLSKDKDLVDKDLITLY
KLFDTSLDAILFSKVSL"
gene complement(74788..75990)
/locus_tag="DMACINML_00337"
CDS complement(74788..75990)
/locus_tag="DMACINML_00337"
/EC_number="2.7.2.4"
/inference="ab initio prediction:Prodigal:2.6"
/inference="similar to AA sequence:RefSeq:CAL34728.1"
/codon_start=1
/transl_table=11
/product="aspartokinase, alpha and beta subunits"
/protein_id="Prokka:DMACINML_00337"
/translation="MLIVQKYGGTSVGTLERIDAVAERVIKSAKEGHQLVVVVSAMSG
VTNTLIEQAEYFSKNPNGKMDMLLSSGERVTSALLSIALNERGYPSLAFSGRKAGIV
TDSVSTKARISYIDTQEITKALNEGKIVVAGFQGV DKEGDVTTLGRGGSDL SAVAVA
GALKADLCEIYTDVDGVYTTDPRIEPKAKKLDKISYEEMLELASLGAKVLQNRVELA
KKLNVKLVTRSSFNDNEGTMITKEDGMEQALVSGIALDKNQARVTLRNIEDKPGIAAE
IFSVLADENINVDMIQNVGVDGATNLGFTVPQNELDLAKNAMQKILGSKTTIESDSA
VVKVSI VGVGMKSHSGVASKAFKALADEGINIGMISTSEIKISMIVHEKYGELAVRAL
HECYGLDK"
gene complement(75990..76460)
/locus_tag="DMACINML_00338"
CDS complement(75990..76460)
/locus_tag="DMACINML_00338"
/EC_number="3.6.1.-"
/inference="ab initio prediction:Prodigal:2.6"
/inference="similar to AA sequence:RefSeq:CAL34727.1"
/codon_start=1
/transl_table=11
/product="putative NUDIX hydrolase family protein"
/protein_id="Prokka:DMACINML_00338"
/translation="MEKEKKYRPNVAIVLSSAYPFECKLFIKRSDMDNIWQFPQGG
IDEGEDPKSAVLRELKEEIGTNEVEIIAEHPEWLSYDFPEKIAKKMYPYDQSQKYFL
VRLKHGAKININTKHPEFDAYQFVGKQVFETINHFKRNIYVKVIKYFEKGYI"
gene 76555..77622
/locus_tag="DMACINML_00339"
CDS 76555..77622
/locus_tag="DMACINML_00339"
/EC_number="1.3.98.3"
/inference="ab initio prediction:Prodigal:2.6"
/inference="similar to AA sequence:RefSeq:AHW91665.1"
/codon_start=1
/transl_table=11
/product="coproporphyrinogen III oxidase"
/protein_id="Prokka:DMACINML_00339"

```



```

/translation="MHLIYHIPFCESKCHYCAFTSLKKHDYENKYFEALYKDISFHLQ
KLNIIKNSIKTLFIGGGTPSAVSAKNFEMILTLIEPFLSKNIEFSSEANPNSADIDWL
KTMKNLGLNRISFGAQS FHPKLEFLGRIHDQKMIKALENANKLGFKKINLDLIYDT
KLDDKMLQFELEQLKQIKNLITHLSAYNLTIIEPLSTFAKKDHFKKNAPYLMKFFIQE
LQKLGFLQYEISNFAKNKAQICKHNLAYWKGLDYLGCGLSAVSCYKNERFYTAKNLKD
YLQNPVFRDVEKLSQEDLNLEHLFLGLRSIVGIEECKLSEIQEKANLLVREKCLKFE
KGRYYNLNFLISDELALYLSS"
gene      77686..78090
          /gene="tatB"
          /locus_tag="DMACINML_00340"
CDS      77686..78090
          /gene="tatB"
          /locus_tag="DMACINML_00340"
          /inference="ab initio prediction:Prodigal:2.6"
          /inference="similar to AA sequence:RefSeq:CAL34725.1"
          /codon_start=1
          /transl_table=11
          /product="sec-independent protein translocase"
          /protein_id="Prokka:DMACINML_00340"
          /translation="MSFGEIIVILIVAILVLGPKLPEAIVQIAKILKALKRNIDDAK
SSIEKEIRINDLKEEAKKYKDEFSSANENIRKLSFEFDDLKRDILDKTKVDLTFDS
RENSTPNPNEQNPENQKPKLNPFENQEKVEK"
gene      78091..78837
          /gene="tatC"
          /locus_tag="DMACINML_00341"
CDS      78091..78837
          /gene="tatC"
          /locus_tag="DMACINML_00341"
          /inference="ab initio prediction:Prodigal:2.6"
          /inference="similar to AA sequence:RefSeq:CAL34724.1"
          /codon_start=1
          /transl_table=11
          /product="sec-independent protein translocase"
          /protein_id="Prokka:DMACINML_00341"
          /translation="MFEELRPHLIELRKRLFISVACVIVMFIVCFARFSYILDVLKAP
LIQALPEVAKHVNVIEVQEALFTAMKVSFFAAFIFSLPVIWFQFWKFPVAPGLYDNEKR
LVVPFVSFASIMFALGACFCYFIVPLAFKFLINFGLEDNPNVITIGTYVDFFTKVV
VAFGLAFEMPVIAFFFAKIGLIDDSFLKRHFRIAVLAIFFVSFAMTPPDVLSQFLMAG
PLCGLYGLSILIVQKVNPPAPKDEEKEESDK"
gene      78834..79859
          /gene="queA"
          /locus_tag="DMACINML_00342"
CDS      78834..79859
          /gene="queA"
          /locus_tag="DMACINML_00342"
          /EC_number="5.-.-.-"
          /inference="ab initio prediction:Prodigal:2.6"
          /inference="similar to AA sequence:RefSeq:ABS44030.1"
          /codon_start=1
          /transl_table=11
          /product="S-adenosylmethionine:tRNA
ribosyltransferase-isomerase"
          /protein_id="Prokka:DMACINML_00342"
          /translation="MKDLLLSSYDYTLPNELIATYPVYPKEDAKLLVFERKNNQISHT

```

```

TFKNLQDFLPDCTLFFNDTKVIKARIYGNKSSGGKIELFLHQPCPLGLQDSLFLAQIKG
RVKKDEILSFEQNLKAQVELLDGLRQVQFFQNEILNTFKLYELLDVIGHVPLPPY
IKRSDEKSDLEDYQSIFAKNLGAVAAPTASLHFSENMLENLKKRHEIYHLTLHVGAGT
FKSVECENLENHKMHSEFFDIPKKACEVIDSQKKILGIGTTVTRTIEYYARTKQSQGF
CDLFLHPHPPLRQDYLLTNFHLPKSTLIMLVSAFIGRQNCCLKLYDIAIKEKYRFYSY
GDAMLIL"
gene      complement(79862..80815)
          /gene="lpxD"
          /locus_tag="DMACINML_00343"
CDS      complement(79862..80815)
          /gene="lpxD"
          /locus_tag="DMACINML_00343"
          /EC_number="2.3.1.-"
          /inference="ab initio prediction:Prodigal:2.6"
          /inference="similar to AA sequence:RefSeq:CAL34722.1"
          /codon_start=1
          /transl_table=11
          /product="UDP-3-O-[3-hydroxymyristoyl] glucosamine
          N-acyltransferase"
          /protein_id="Prokka:DMACINML_00343"
          /translation="MRLKEIAEFLSLEYEGEDIEITALNSLLRANFTELTCDGERNI
          KDIPNTGAAAILVAKEYENLVPKDTKALITQSPHLCFAFLSKIFAKPLFSNAKEKVQN
          IAKSAKIMPVYIGNNVNIGENVVIMAGAYIGDNVSI GEESI IHPNVVIYNDKIGKK
          CHLLANCVIGSDGFGYAHNKNGEHYKIYHNGNVILEDVFEIGACTTIDRAVFDSTI IK
          AGTKVDNLVQIGHNCDIGQNCIIVAQTGISGSSELGRNVVMGGQSATSGHLRIGDFST
          IAARGGVSKNLEGGRVYGGFPIMLQKDWLKLQAKIAMKFE"
gene      complement(80812..81276)
          /gene="ilvH"
          /locus_tag="DMACINML_00344"
CDS      complement(80812..81276)
          /gene="ilvH"
          /locus_tag="DMACINML_00344"
          /EC_number="2.2.1.6"
          /inference="ab initio prediction:Prodigal:2.6"
          /inference="similar to AA sequence:RefSeq:CAL34721.1"
          /codon_start=1
          /transl_table=11
          /product="acetolactate synthase small subunit"
          /protein_id="Prokka:DMACINML_00344"
          /translation="MRRVLSVIVLNEHGVLSRIVGLFSGRGYNIDSLTVAPLPGGEFS
          RINIVTFGDERVFEQIVKQLHKLIPYKVIERDEFIEKEMALVKIPLSENGLGLDAVL
          KAYNGTIANSNENFLLLVADDTNRIENFLKTIKKYNPSDIVRSGSVLMELK"
gene      complement(81273..82973)
          /gene="ilvI"
          /locus_tag="DMACINML_00345"
CDS      complement(81273..82973)
          /gene="ilvI"
          /locus_tag="DMACINML_00345"
          /EC_number="2.2.1.6"
          /inference="ab initio prediction:Prodigal:2.6"
          /inference="similar to AA sequence:RefSeq:CAL34720.1"
          /codon_start=1
          /transl_table=11
          /product="acetolactate synthase large subunit"

```

```

/protein_id="Prokka:DMACINML_00345"
/translation="MRKISGSAMICEALKEENVKIVFGYPGGAALNIYDEIYLQKYFK
HILVRHEQAAVHAADAYARMSGEVGVAVVTSVGPFTNTITGLATAYSDSIPLVLISGQ
VANSLIGTDAFQEIDAVGISRPCVKHNYLVTCIEEFPRILKEAFYIAKSGRKGVPVHID
VPKDVSAALGIWDYPKEISMKTYKPIYKGNKQIKKLAENLEEAKRPLFYLGGGCIAS
NAADEIRELVKITQIPAVETLMALGTLRSDELNLK MAGMHGSY TANMALSECDLLVA
IGARFDDRITGKTSEFAKHSKIVHIDIDPSSISKIINAHFPIVVDIKEVVKELLEELK
KNQFKSNIHEWRQTLKRYDELYPLAYEDSDEVLPQWVIQECAKLAPDARIITDVGQH
QMWVAQFYPFNYPRQLATSGGQGTMGYSLPAALGAKLAVGEEVVINFVGDGSVLMNIQ
ELMTAYENGIKTINIILNNSFLGMVRQWQSMFYEEHFSATDLSLQADFVKIAEGFGCE
GYNIKTKDEFHTAFKQALESNKTSLLNVFIDRFEDVLPMPVAGGAIYNMILPKLKDKQ
"
gene      complement(83051..83494)
          /locus_tag="DMACINML_00346"
CDS      complement(83051..83494)
          /locus_tag="DMACINML_00346"
          /inference="ab initio prediction:Prodigal:2.6"
          /inference="similar to AA sequence:RefSeq:CAL34719.1"
          /codon_start=1
          /transl_table=11
          /product="putative GatB/Yqey family protein"
          /protein_id="Prokka:DMACINML_00346"
          /translation="MTLKEQILNDIKEAMKQKDDFKRDTLRTLNAAFKQVEVDERIEL
DDERILKIITSEIKKRKDAIELYKGGREDLAQKEQKEIALFESYLPQQLSDEELQTA
LKELIANLGVSSLKDQGLVMKEAKAKFGARVDGKRLNVTLRELLN"
gene      complement(83511..84530)
          /gene="ribB"
          /locus_tag="DMACINML_00347"
CDS      complement(83511..84530)
          /gene="ribB"
          /locus_tag="DMACINML_00347"
          /inference="ab initio prediction:Prodigal:2.6"
          /inference="similar to AA sequence:RefSeq:EAQ73046.2"
          /codon_start=1
          /transl_table=11
          /product="3,4-dihydroxy-2-butanone 4-phosphate synthase"
          /protein_id="Prokka:DMACINML_00347"
          /translation="MKFVSIEQAIKDLQEGKMLVMVDAEDRENEGDLIFPAQFSTKEK
VNFMIKEARGVVCVALAEELARKFELPLMVPKNTSNHETAFTITVDAKDATTGVSAYE
RDMTIKIFADDNAKASDFVCPGHINPLIAKKGVLERTGHTEGTVDLCLAGLKQACV
ICEIVKDDGDMARRSDLEEFCAKHNLMIAVSDIIEYRLKNESLIKLQEKS DAILAGF
KAQKFIFTDHNAQHIAFAFKEIQKCENVKFHISGSDFELLTSDKFSKLLDQICFLSE
NGGVIVFMQGEKSSATQFKNYGIGAQILRYFGIEEIKLMSQSCDKDYIGLKGFGFLNLK
ICNFN"
gene      84637..84711
          /locus_tag="DMACINML_00348"
tRNA     84637..84711
          /locus_tag="DMACINML_00348"
          /product="tRNA-Gln"
          /inference="COORDINATES: profile:Aragorn:1.2"
          /note="tRNA-Gln(ttg)"
gene      84743..84818
          /locus_tag="DMACINML_00349"
tRNA     84743..84818

```

/locus\_tag="DMACINML\_00349"  
 /product="tRNA-Met"  
 /inference="COORDINATES: profile:Aragorn:1.2"  
 /note="tRNA-Met(cat)"  
 gene complement(85033..85108)  
 /locus\_tag="DMACINML\_00350"  
 tRNA complement(85033..85108)  
 /locus\_tag="DMACINML\_00350"  
 /product="tRNA-Phe"  
 /inference="COORDINATES: profile:Aragorn:1.2"  
 /note="tRNA-Phe(gaa)"  
 gene 85250..86593  
 /gene="ktrB"  
 /locus\_tag="DMACINML\_00351"  
 CDS 85250..86593  
 /gene="ktrB"  
 /locus\_tag="DMACINML\_00351"  
 /inference="ab initio prediction:Prodigal:2.6"  
 /inference="similar to AA sequence:RefSeq:CAL35397.1"  
 /codon\_start=1  
 /transl\_table=11  
 /product="putative K+ uptake protein"  
 /protein\_id="Prokka:DMACINML\_00351"  
 /translation="MKQFGLDRRTFKILLAGYIVIALLGAILLHSSWAHTSPISFIDA  
 FFTSTSAVSMTGLIVKNTAVDFTLAGQIIILILVQIGGLGYMSIGL FVYLIIRKKVGF  
 NGRNLLKESLFYPSMEGLFKFFKKVLLFI FTIELIGTILLTMRFALEMNFGKALWFGF  
 FHSISAFNNSGFTIFENGLLAYKHDVAINLIFTSLIIIGGLGYFVLVELYFFQRKRLQ  
 NLSLHTKVIMATLFLIVSSTLIIFLLEYANPKSIGSFSLFDKILSSYFIAINYRTAG  
 FNTLDMSGLHDASLFFGSLFMVIGGAPGGTAGGMKITT VVVLLFYAYWSIRNGRVRI  
 NHEIPQEIISRAFIIAVGSAVYIVIAVIFLSLLESEFNFIHLLFETSSAFATVGVISVG  
 DGGDLSLCALFSNPSKIIIIIMMLSGRIGVFAFLLSVFQQDKAMHIKFKPKGIYL"  
 gene 86606..87256  
 /gene="ktrA"  
 /locus\_tag="DMACINML\_00352"  
 CDS 86606..87256  
 /gene="ktrA"  
 /locus\_tag="DMACINML\_00352"  
 /inference="ab initio prediction:Prodigal:2.6"  
 /inference="similar to AA sequence:RefSeq:CAL35398.1"  
 /codon\_start=1  
 /transl\_table=11  
 /product="putative K+ uptake protein"  
 /protein\_id="Prokka:DMACINML\_00352"  
 /translation="MKKLSYGVIGLGKFGSVVADELIAGGHTVIIADKDEEALKSIQN  
 SPSYAYILDSTNISALKEAGFHDVEVVIVSIGENVEKSIL TLMALKDIGVNNIIAKAT  
 SNIHGQILSKLGATKVIYPEKESAKKLVKDFLTKDADYEVFDLSANTIRAIKITIDDK  
 LAGNSLKHIAQNMKVISYKKLNTDWEILPDLETTTVYGGDVVILLGTVKELREFEH"  
 gene complement(87257..87964)  
 /locus\_tag="DMACINML\_00353"  
 CDS complement(87257..87964)  
 /locus\_tag="DMACINML\_00353"  
 /inference="ab initio prediction:Prodigal:2.6"  
 /inference="similar to AA sequence:RefSeq:CAL35399.1"  
 /note="conserved hypothetical protein Cj1285c"

```

/codon_start=1
/transl_table=11
/product="hypothetical protein"
/protein_id="Prokka:DMACINML_00353"
/translation="MREIGFLIPWIKMIFGKIDYINLLPLHIYLKKYPLPNGYKASME
YKKGVPSKLNKDLFYRRVDAIIVSSIESARKKYKNLDLGICANKRVLSVLVERNTLNA
KDPSSATSNALAKVLKQEGRVIIGDKALKLYLQDPSKYIDLCAKWHEKTGLPFV FARF
SCVQKKALYKQILKKFPKTKIKIPYYILQNYATTRNLDIKDMRYYLDEIIYYKISTKE
KAALKRFIKACKALNPT"
gene complement(87930..88559)
/gene="upp"
/locus_tag="DMACINML_00354"
CDS complement(87930..88559)
/gene="upp"
/locus_tag="DMACINML_00354"
/EC_number="2.4.2.9"
/inference="ab initio prediction:Prodigal:2.6"
/inference="similar to AA sequence:RefSeq:CAL35400.1"
/codon_start=1
/transl_table=11
/product="uracil phosphoribosyltransferase"
/protein_id="Prokka:DMACINML_00354"
/translation="MKNIHHICHPLIEHKLGLRDKETKPFHFRMLIDEISTFLLFEA
TKDLCLKEAQIQTPVANAKVKRLDEKIMICPILRAALGMLDSIFRLIPDASVGF LGFV
RNEKTLKADFYFQKLPKDAKERTAIVIDPMFATGGTAIDACNFLKDQGVKKIKFISIL
AAPQGLENF AKIHSDELVYASIDESLNEKGYIVPGLGDAGDRVFNTLD"
gene complement(88556..89791)
/locus_tag="DMACINML_00355"
CDS complement(88556..89791)
/locus_tag="DMACINML_00355"
/EC_number="1.1.1.38"
/inference="ab initio prediction:Prodigal:2.6"
/inference="similar to AA sequence:RefSeq:CAL35401.1"
/codon_start=1
/transl_table=11
/product="malate oxidoreductase"
/protein_id="Prokka:DMACINML_00355"
/translation="MNLKEEALRYHLGGKIDIKPSKPMNSSHDLSLAYS PGVAEPCIE
IASNNELAYTYTNKANLVAIVSDGSAVLGLGNIGAQAASKPVMMEGKACLFKKFADV NAY
DLEIEAHSIEEIVAFCKAIAPTFGGINLEDISAPKCFEIEAALQNLGIPVMHDDQHGT
AIISTAGLMNAMEISGKKFEDIKVVVSGAGAAGIASARMYRNLGVKNIILVDSKGVVN
KKRTDLNQYKLEFVSDTQADTLKEAMKDADVFLGLSAPKILDDEMILSMAKDPVIFAL
ANPIPEVMPEDVARLRKDAIVGTGRSDYPNQINNVLGFPFIFRGALDVRATKITENMK
VAAARALADLAKLPVSDAVKNAYNISHLEFGKDYVIPKPFDERVKAVVSTAVAAA AVK
DGVALLKEFDEKAYFESLK"
gene complement(89791..91182)
/gene="gltX2"
/locus_tag="DMACINML_00356"
CDS complement(89791..91182)
/gene="gltX2"
/locus_tag="DMACINML_00356"
/EC_number="6.1.1.17"
/inference="ab initio prediction:Prodigal:2.6"
/inference="similar to AA sequence:RefSeq:CAL35402.1"

```

```

/codon_start=1
/transl_table=11
/product="glutamyl-tRNA synthetase"
/protein_id="Prokka:DMACINML_00356"
/translation="MTGKLTTRFAPSPTGYLHIGGLRTALYSYLYARKNKGNFLLRIE
DTDLKRNSKEATQAIIEAFKWCGLDYDGEVTYQSERFDLYKKYIQKLLDEGKAYCYM
SKEELDELRAKQEAAKERPRYDGRYRDFGTTPANIEPVVRIKAPQEGEICFVDGVKG
EVKFKVEDILDDFIIARSDGSPTYNFTVVIDDALMGVSDVIRGDDHLSNTPKQIVLYE
ALGFEIPKFYHVAMIHGEDGKKLSKRHGATDVMEYKAMGILPQALLNFLVRLGWSHGD
DEVFSLEDLKKLFDPNHINKSASCYNFKKLEWLNHYIKTLPFEEINRQLKDLGFDLS
AYAKAGFLDLLRERAKTLLIISGAKSIIIEAPQNYDENAINKFINENLLLLQNYAN
ELNEEKSAKDFEFTNEFLQKNEVKLKDLAQPIRIALTGSVSPSIFEVLEFLGVNEC
KKRIEKFLDFK GK"
gene 91247..92062
/locus_tag="DMACINML_00357"
CDS 91247..92062
/locus_tag="DMACINML_00357"
/inference="ab initio prediction:Prodigal:2.6"
/inference="similar to AA sequence:RefSeq:CAL35403.1"
/codon_start=1
/transl_table=11
/product="putative periplasmic protein"
/protein_id="Prokka:DMACINML_00357"
/translation="MKKILLSFIFFISLTHANTINAIAVVVDKEPITTYDIEQTMKAL
NIPKNQALGILINEKMELSQIKQFGIYTSELELDNAIDKMLMQNKISLEDFKKDLQVK
GQNYEQFRSNFKKDFEKRKLYEKIASTAKTDFSDGAKNFFEQKNKFTFFTEINVNI
YRSNNAQDLENIRAAIKTPLKAEKAILTPNNSDPRLGLLSPIPLGGFSPVLNSQKGY
EIQVNDKSKGQTPEYYQIKNEVLNAYVSEQRQNYIQDYFDKLRSKINIEYLR"
sig_peptide 91247..91300
/locus_tag="DMACINML_00357"
/inference="ab initio prediction:SignalP:4.1"
/note="predicted cleavage at residue 18"
gene complement(92090..93421)
/locus_tag="DMACINML_00358"
/EC_number="6.3.4.14"
/inference="ab initio prediction:Prodigal:2.6"
/inference="similar to AA sequence:RefSeq:CAL35404.1"
/codon_start=1
/transl_table=11
/product="biotin carboxylase"
/protein_id="Prokka:DMACINML_00358"
/translation="MEIKSILIANRGEIALRALRTIKEMGKKAICVYSEADKDALYLK
YADASICIGKARSSESYLNIPAIISAAEIAEADAI FPGYGFLSENQTFVEICAKHNIK
FIGPSVEAMNLM SDKSKAKQVMQ RAGVPVIPGSDGALAGAEAAK LLAKEIGYPVILKA
AAGGGGRGMRVVEHEKDLEKAYWSAESEAMTAFGDGTMMEKYIQNPRHIEVQIIGDS
FGNVIHIGERDCSMQRRHQKLI EESPAILLDEKTRARLHETAVKAAKAI SYEGAGTFE
FLVDKNLDFYFIEMNTRLQVEHCVSEM VSGIDIIEQMIKVAEGYALPSQENVRLK GHS
IECRITAEDPKTFLSPGKIIKYVPPAGRNVRMESH CYQDYSVPPYYDSMIGKLVVWA
EDRNKAISKMKVALDELIIGGIKTTKDFH LAMMDNPDFINNNYDTNYLARH"
gene complement(93423..93878)

```

```

/ gene="accB"
/ locus_tag="DMACINML_00359"
CDS complement(93423..93878)
/ gene="accB"
/ locus_tag="DMACINML_00359"
/ EC_number="6.4.1.2"
/ inference="ab initio prediction:Prodigal:2.6"
/ inference="similar to AA sequence:RefSeq:CAL35405.1"
/ codon_start=1
/ transl_table=11
/ product="putative biotin carboxyl carrier protein of
acetyl-CoA carboxylase"
/ protein_id="Prokka:DMACINML_00359"
/ translation="MTKEEIKELVNLFAEANISKIKIKEQDGFIEI LERDMCCDVPAP
LACPPVPAPQPINVVVNEAQPSSAKSNKPSINSPMVGTFYQAPSPGAAPFVKVGSSV
KKGDTIAIIEAMKIMNEIEAEFDCRIVEILVADGQPVVEFGMPLFTVEKL"
gene 94037..94597
/ gene="dcd"
CDS 94037..94597
/ locus_tag="DMACINML_00360"
/ gene="dcd"
/ locus_tag="DMACINML_00360"
/ EC_number="3.5.4.13"
/ inference="ab initio prediction:Prodigal:2.6"
/ inference="similar to AA sequence:RefSeq:CAL35406.1"
/ codon_start=1
/ transl_table=11
/ product="putative deoxycytidine triphosphate deaminase"
/ protein_id="Prokka:DMACINML_00360"
/ translation="MGLKADNWIRKMALEHQMI EPFCEANIGKGVVSYGLSSYGYDIR
VGREFKIFTNVNSTVDPKNFLEENVVDFEGDVCIVPANSFALARTIEYFKMPDDVLA
ICLGKSTYARCGIIVNVTPFEPGFEGHITIEISNTTPLPAKIYANEGIAQVFLQGD E
KCDTTYKDKKGYQAQTGITLPRILK"
gene 94651..95655
/ gene="pseB"
CDS 94651..95655
/ locus_tag="DMACINML_00361"
/ gene="pseB"
/ locus_tag="DMACINML_00361"
/ inference="ab initio prediction:Prodigal:2.6"
/ inference="similar to AA sequence:RefSeq:CAL35407.1"
/ codon_start=1
/ transl_table=11
/ product="UDP-GlcNAc-specific C4,6 dehydratase/C5
epimerase"
/ protein_id="Prokka:DMACINML_00361"
/ translation="MFNGKNILITGGTGSFGKTYTKV LLENYKPNKIIIYSRDELKQF
EMSSIFNANCMRYFIGDVRDKERLNVAMRDVDFVIHAAAMKHVPVAEYNPMECIKTNI
HGAQNVIDACFENGVKKCIALSTDKACNPVNL YGATKLASDKLFVAANNIAGNKQTRF
SVTRYGNVVGSRGSVVPFFKKLIAQGAKELPITDTRMTRFWISLEDGVK FVLSNFERM
HGGEIFIPKIPSMKITDLAHALAPNLSHKIIGIRAGEKLHEIMISSDDSHLTYEFENY
YAI SPSIKLVDQESDFSINALGEKGQKVDGFSYSSDNNPQWASEKELLDIINHTEGF
"
gene 95656..96786

```

/gene="pseC"  
 /locus\_tag="DMACINML\_00362"  
 CDS 95656..96786  
 /gene="pseC"  
 /locus\_tag="DMACINML\_00362"  
 /inference="ab initio prediction:Prodigal:2.6"  
 /inference="similar to AA sequence:RefSeq:CAL35408.1"  
 /codon\_start=1  
 /transl\_table=11  
 /product="C4 aminotransferase specific for PseB product"  
 /protein\_id="Prokka:DMACINML\_00362"  
 /translation="MITYSHQNIDQSDIEAVLNALKDEILTGGKKVDEFEEALCEYIG  
 IKHACVLNSATSALHLAYTALNVKDKIILTTPLTFAATANAALMAGAKVEFIDIKNDG  
 NIDEKKLEARLVKNSTDIGAISVDFGGNSVEMDEISNLAKKYNIPILIDDASHALGSE  
 YKGKKVGSMDLSIFSHPVKPITTFEGGAVSVNNEELISKIKLLRSHGIVKKRLWDS  
 DMMELGYNRLSDVACALGINQLKKLDHNLKREEIASFYDKEFDKNPYFSTIKIKDY  
 KKSSRHLYPILLPPEFYCPKEEIFENLLKAGLGVQVHYKPTYEFSFYKLLGEIRLEN  
 ADNIFYKAELSIPCHQEMSLKDAKFVRDTLSTLEKVKKDYCG"

gene 96779..98095  
 /locus\_tag="DMACINML\_00363"  
 CDS 96779..98095  
 /locus\_tag="DMACINML\_00363"  
 /inference="ab initio prediction:Prodigal:2.6"  
 /inference="similar to AA sequence:RefSeq:ALJ17966.1"  
 /codon\_start=1  
 /transl\_table=11  
 /product="aminopeptidase"  
 /protein\_id="Prokka:DMACINML\_00363"  
 /translation="MDKLDFRHKDFEQTKAMYELAKELFPIPRSITQGFRASLEIL  
 NKTLDGENILKFHSIKSGTRVFDWIVPDEWNAKEAYIITPEGKKICDFKKHNLHLLNYS  
 EAIDKEIELEEKHLYSIEEMPDAIPYVTSYYKRRWGFCTHNERKNLKKGLYKVF  
 DAKHDENGLNYADFIIPSTQNSKDEILLSSYLCHPSMANNELSGPIVAIFLAKWLLG  
 LKERKYNRYFVPIPETIGSIIYLNKHLKHLKHHVAGFVLSCLGDDNAYSIIHTPKEN  
 TLLSDKVMHTLKNKENFKEFSFLERGSQYQYAPLVNLNIVGICRTKYGEYKEYHTS  
 KDDLNFISVKGLMGGLKAMQEIIINLEINAIYENTTICEPNLGRGLYHTINNGIKQK  
 PISVDFLAYCDGQNDIIDIANILNIQAYELKELLEKILEYKLVKRI"

gene 98092..98877  
 /locus\_tag="DMACINML\_00364"  
 CDS 98092..98877  
 /locus\_tag="DMACINML\_00364"  
 /inference="ab initio prediction:Prodigal:2.6"  
 /inference="similar to AA sequence:RefSeq:ADN91469.1"  
 /codon\_start=1  
 /transl\_table=11  
 /product="aminoglycoside N3'-acetyltransferase"  
 /protein\_id="Prokka:DMACINML\_00364"  
 /translation="MKKLFQYNQKIYTKDLVNTLKNIGIKNGDIICVHTEIFHFQTP  
 LLSKNEFLNSFLEALFKAIGKEGTLIMPTFTYSFCKNEVYDKLNSKCTVGILNEFFRK  
 QEGVKRTNDPIFSFAVKGAKEDFLYKEQKSCFDEGCIYNILKNNNGKIVLLGTQLLG  
 YTFTHFIEEQARVPYRYFKPFKGDIIYENSNNKTYKINYYVRDLHKKSEVSILKQIAL  
 LKNSNNFKLEKIGNAEIVSIDCQAYFDETMKALKQDPYCLLKD"

gene 98879..100387  
 /locus\_tag="DMACINML\_00365"  
 CDS 98879..100387



```

/locus_tag="DMACINML_00365"
/EC_number="6.3.2.-"
/inference="ab initio prediction:Prodigal:2.6"
/inference="similar to AA sequence:RefSeq:CAL35421.1"
/codon_start=1
/transl_table=11
/product="putative amino acid activating enzyme"
/protein_id="Prokka:DMACINML_00365"
/translation="MTTHIYNFLEKSLANFSDKTA FVEPFAKERKEITYKNFDLFSKK
VASEILKKLGNPNPTQSPILIIILPKGIDCLISFFGVALSGNFYTLLEKSPKERVEKV
IEILKPKLFITSKELKFDLALPTLYTEDFKSFDTDENLIQVAKEKHIDTNLLYVLFST
GSTGIPKGV SIAHKSVIDYTFWVCETFKFDENEILANQAPFYFDNSILDIFSSVKAGA
TLHLLPNHLFAFPNKILECLEKEKVSATFWVPSVLIYFANTEALDNFNLINLKKILFA
GEIMPKNQLNIWRKHL PDTLFANLYGPTEITVDCSFYIVDREFKDEELLPIGKACKNT
ELLVFDESMNLISSKQVGK GELYVRGTSLSLGGYNDKEKTQKAFIQNPLHDNYLDLL
YKTGDIVAYNERGELLCYGRADNQIKYMGHRIELGEIESVINSHPKVKNSACIFKDKI
ICFYESDEELDLKTFCKERLVS YMIPNKLIKLDKFQFNQNGKIDRKVLNEFI"
gene 100374..101117
/locus_tag="DMACINML_00366"
CDS 100374..101117
/locus_tag="DMACINML_00366"
/inference="ab initio prediction:Prodigal:2.6"
/inference="similar to AA sequence:RefSeq:AAW35938.1"
/codon_start=1
/transl_table=11
/product="acetyltransferase, GNAT family"
/protein_id="Prokka:DMACINML_00366"
/translation="MNLFEFEK NYFKGFKLSNWNESISILKEKFHKKLSLESYDSN
FFYENNSHLLYYFINDTNKKNLKP SFIKISIKHEKYLDHDLNFIHLHSFNVELECQ
EMCLKNKNIIILHDFPFITQANIQDYEQIYNFFLKHFSKDFLFYFSKNDIKNKINQILI
YKENGIIRGALIYTLTIKSAFLDFIAVDKNLHYKNVAFALLNTYFKKNFNTHLFKLFV
SVHNLKALKFYQRAGFTLNTAKILYYKNF"
gene 101144..101380
/gene="acpP4"
/locus_tag="DMACINML_00367"
CDS 101144..101380
/gene="acpP4"
/locus_tag="DMACINML_00367"
/inference="ab initio prediction:Prodigal:2.6"
/inference="similar to AA sequence:RefSeq:ADN91472.1"
/codon_start=1
/transl_table=11
/product="Putative acyl carrier protein"
/protein_id="Prokka:DMACINML_00367"
/translation="MQNTLELIKQFFINIDRSIDENMENLLSEDIIDSMDIMSLVAE
IEKYYKPLKA EFIKAENFESFQTIKNMLEQAMK"
gene 101382..102533
/locus_tag="DMACINML_00368"
CDS 101382..102533
/locus_tag="DMACINML_00368"
/inference="ab initio prediction:Prodigal:2.6"
/inference="similar to AA sequence:RefSeq:AVS37640.1"
/codon_start=1
/transl_table=11

```

```

/product="FkbM family methyltransferase"
/protein_id="Prokka:DMACINML_00368"
/translation="MNFINKKNQNNITTIYILRFPLFEKIKNIHAHIYGGIEYISYTF
KIFSFKFYTTKKTLELSDPEFLSKNLENLLNQSNOQKQWNQSFYMQDIIGKYLVENNT
EKILKLCNKLDNESKALIFRILTRLKNFQTNPNYQIKYTKEEKQDLEKLQNEFFSNIL
PISKGIFGWNGYFLPIKQFEISVFWHKHAMHTFSNQTLEKIKNKNIIDVGGFIGDSA
IFEKEFTNQKVYSFEAVSKNYDLMLKTLELNNSKRIIPVKNALGSKEEKLQISISGYS
SSLKHGESNSNYEEVEVITLDSYIEKNPMEIGFIKVDIEGFEQEFKGAINTIKAQKP
AMLISIYHNPNDFFDIKPLIESWNLGYKFKIYRPIDFVVSLETALYCEI"
gene complement(102530..103738)
CDS /locus_tag="DMACINML_00369"
complement(102530..103738)
/locus_tag="DMACINML_00369"
/inference="ab initio prediction:Prodigal:2.6"
/inference="similar to AA sequence:RefSeq:ADN91473.1"
/codon_start=1
/transl_table=11
/product="hypothetical protein"
/protein_id="Prokka:DMACINML_00369"
/translation="MLINQTFKIDSCDDVELGIKRTSKLEYRISYDDEKEMRAIVFII
GGIGANANISFLDFDREYIAKNFDVVVVHVFYHCFARRSIDEEYNALTIPTKEDLPK
LAQALFGMGINMSVSLNAHQCYELLNQYITALKSQGLAQNYQARLTSTFIPPNGDY
QNFGIMAAIDHINVLKDLVKKFPNFKNLPKIYGGGSYGGYLSLLIAKIAPWYVDGVID
NSGSVLPLLLNYIIGRNLRSEFVFNPNPTFVEMFVKTYWTREDENSPYFFANENYMir
ALLNSFHLQIQAKNNNIIFIGYHSKDEFDTSKDKETLFESYKALGYDSTLYLIKDE
SQIDGRFIKDLKHGMRITDKALFKKELPLMLEKLGQRKSLMQENSISYPCGDKIFTFK
DDKMSFALHC"
gene 103828..104526
/gene="pseF"
CDS /locus_tag="DMACINML_00370"
103828..104526
/gene="pseF"
/locus_tag="DMACINML_00370"
/EC_number="2.7.7.43"
/inference="ab initio prediction:Prodigal:2.6"
/inference="similar to AA sequence:RefSeq:CAL35425.1"
/codon_start=1
/transl_table=11
/product="putative acylneuraminate cytidyltransferase"
/protein_id="Prokka:DMACINML_00370"
/translation="MKNLCIIPARGGSKRIPKKNIIDFLGKPLIAYSIESALNSGIFD
EVVSSDDEEIIKIACQFGAKAPFVRDEKLSDDYSSSTAVIQNAIEILAKKGQVYD
CALYATAPLISGEILKAYEKFLENEGKFLFSATEFDYPIQRAFYLNEKNQVHMFDES
FYNSRSQDLTKAYHDAGAFYFGKSKAWLENDFLFKPHSSVYLLPRNLVCDIDTLE
FAKILYKVNYESSL"
gene 104510..105331
/locus_tag="DMACINML_00371"
CDS 104510..105331
/locus_tag="DMACINML_00371"
/inference="ab initio prediction:Prodigal:2.6"
/inference="similar to AA sequence:RefSeq:APU78225.1"
/codon_start=1
/transl_table=11
/product="nucleotidase"

```

```

/protein_id="Prokka:DMACINML_00371"
/translation="MKVLFSDSSSQIGFGHIKRDVLVAKQYSDVSVFACLALEGLID
EIPYPVYELESSSIYELIDLIKEQKFKLLIIDHYDISCDDEKLIKLETGVKILSFDE
IKAHCDILLNVNAYSASDYKGLVFPFRCFELRCGFSYALIRDEFYKESKIKREKIWDY
FICIGGTDIKNLSMQIASDLPKNKKIAIATSSSNKLNKLEKFTQDHENVKLFIDEEI
SKLMNESTKLIISASSLVNEALLKANFKAICVAKNQEKLANWLVQKGYEVEYRL "
gene 105328..105789
/locus_tag="DMACINML_00372"
CDS 105328..105789
/locus_tag="DMACINML_00372"
/inference="ab initio prediction:Prodigal:2.6"
/inference="similar to AA sequence:RefSeq:APU78226.1"
/codon_start=1
/transl_table=11
/product="acetyltransferase"
/protein_id="Prokka:DMACINML_00372"
/translation="MIYLKDFAHLDKQEILLVWQRNDEKISQFMKIKYIDFQEHLNF
ITSLKKDQSKKYFLVFKDNEAIGVIDFINIAKDSCEFGLYAKPDLKGMGQILMQEIKK
YTFEKLKIKKLKACVFKQNKRALDLYLKNSFCIKNEDEMNFYVEFMGGNS "
gene 105829..106464
/locus_tag="DMACINML_00373"
CDS 105829..106464
/locus_tag="DMACINML_00373"
/inference="ab initio prediction:Prodigal:2.6"
/inference="similar to AA sequence:RefSeq:AHW92334.1"
/codon_start=1
/transl_table=11
/product="formyltransferase"
/protein_id="Prokka:DMACINML_00373"
/translation="MKIAILTSPNQWFIPYAKELNQIENSKLFYNHTEIFNFDIVFI
LSYHKIIDKNFLKHNKHNIHASNLPQGGWAPLFHQVIEGKNEITFSLFEADKAD
NGDIYLQKNLKLNGLELYEELREKQARFTLNMCLFLLKLYPNIQAKKQVGKESFYPKR
SPKDSELDINKSLNEQFNLLRIASNEFPAFFYKDGKKFILKIYLDSTGGG"
gene 106649..106942
/locus_tag="DMACINML_00374"
CDS 106649..106942
/locus_tag="DMACINML_00374"
/inference="ab initio prediction:Prodigal:2.6"
/inference="similar to AA sequence:RefSeq:ADN91477.1"
/codon_start=1
/transl_table=11
/product="hypothetical protein"
/protein_id="Prokka:DMACINML_00374"
/translation="MSLNHIILGSINLDKLNKTTASFGFYSNPFSHLSGLGRILEQSS
IYLACNFKIKVLKLEIFQENLQVINLHKKFGFAITKETIKHDKKIFIMQLVF "
gene 106988..108019
/gene="pseI"
/locus_tag="DMACINML_00375"
CDS 106988..108019
/gene="pseI"
/locus_tag="DMACINML_00375"
/EC_number="4.1.3.-"
/inference="ab initio prediction:Prodigal:2.6"
/inference="similar to AA sequence:RefSeq:CAL35431.1"

```

```

/codon_start=1
/transl_table=11
/product="Pse synthetase"
/protein_id="Prokka:DMACINML_00375"
/translation="MQIGNFNTDEKVFIIAELSANHSGSLEMALKSIIKAAKEAGADAI
KIQTYTPDSLTLDCDKDDFIKGGGLWDQRKFYELYESAKTPYEWHSQIFEAQDAGIL
CFSSPFAKEDVEFLKRFDPYIAYKIASFEANDENFVRMIAKENKPTIVSTGIASEEELF
KICEIFKEEKPNLIFLKCTSAYPAQISDMNLKGIISLKEKFGVEVGLSDHSFGHLAP
VMAVALGARVIEKHFMLDKNIKSEDSKFSLDDEFKAMVEAVREAESALGDGSLALDE
KSLKNRVFARSLYASKDIKKGEIFSEENVKSVRPSFGLHPKFKYKELLGKTATKDIIEFG
TALKQGDFQ"
gene 108016..108984
      /gene="rmd_1"
      /locus_tag="DMACINML_00376"
CDS  108016..108984
      /gene="rmd_1"
      /locus_tag="DMACINML_00376"
      /EC_number="1.1.1.281"
      /inference="ab initio prediction:Prodigal:2.6"
      /inference="similar to AA sequence:RefSeq:AJA55542.1"
      /codon_start=1
      /transl_table=11
      /product="GDP-6-deoxy-D-mannose reductase"
      /protein_id="Prokka:DMACINML_00376"
      /translation="MKILVTGADGFIGSHLCESLVQKGYKVRALSQYNSFNFWGHLEK
SPYLKDMEVVSGDLRDSFFCEKITQGMDAIFHLGALIAIPYSYEAPQSYVDTNVKGTL
NMLEAAKKNEISHFIHTSTSEVYGTARYVPIDEKHPLQPSPYSASKIAADMMALSYY
NAFNLNVNIARPFNTYGRQ SARAIPTIITQILSGVKELKLGDLSPTRDLNFVLDTC
EGFISLLKLNHFGEVYNIGSGTEYSMQEVLDLIQKILNQNVKIIQDEKRLRPKNSEVF
RLKCDSSKLQATHWQSKISLEEGLKLSIEYFKENLASYKSEIYNV"
gene 108977..110128
      /locus_tag="DMACINML_00377"
CDS  108977..110128
      /locus_tag="DMACINML_00377"
      /inference="ab initio prediction:Prodigal:2.6"
      /inference="similar to AA sequence:RefSeq:CDH63148.1"
      /codon_start=1
      /transl_table=11
      /product="Bacillosamine/Legionaminic acid biosynthesis
aminotransferase PglE;
4-keto-6-deoxy-N-Acetyl-D-hexosaminyl-(Lipid carrier)
aminotransferase"
      /protein_id="Prokka:DMACINML_00377"
      /translation="MFENEITFIKKLFNKEKIALHEPCFIGNEKKYLLECIDSGFVSS
VGEFVTRFEEALKQRTKARFVIATNTGTAALHIALLANGIDENCEVITQSSISFVATAN
AIAYTGARAIFLDIDENTLSLSPKALQNFLNHSYQKDGFTYNKITHKRIKACVVMHT
FGLSANIEKLCEICKNYNIFLIEDAAEALGSTYKNKALGTFGKCGILSFNGNKIITGG
SGGAILCDDENLANLAKHLSTTAKIPHPYEYDHDIIIGYNYRLCNINAAIILLAGLEKLD
FFLENKRELAQIYKEFFAHHKACKFIDERKNSKSNFWLNALCFK DENLRNIFLQECLK
NNIFARPVWKSLSLKPFTWQKDELLNTQKLEKCLVNLPSVRLDKEK"
gene 110128..110847
      /locus_tag="DMACINML_00378"
CDS  110128..110847
      /locus_tag="DMACINML_00378"

```

```

/inference="ab initio prediction:Prodigal:2.6"
/inference="similar to AA sequence:RefSeq:CDH63149.1"
/codon_start=1
/transl_table=11
/product="FIG00471635: hypothetical protein"
/protein_id="Prokka:DMACINML_00378"
/translation="MKKFINNEEISNNIGTNEEIWENIFSNKEWGKYPSENLRIFIAR
NFYNVKRNREIRILELGLGTGANLWFCAREGFRVSGIEWSKTGVERFQKRLSDENLSS
QIDEIKIGDYEQKLDEFKDESFDAWIDSYSLAYNDFKKTKTIIIEKAISKLKSGGKFFS
ITPSFNNEGFENENLGYHECKPTLGSDAFTGVIRYCDEEDLKELYNGKNYQITDIKI
ARFASLEKLNELYIIEGQKL"
gene 110851..111555
/locus_tag="DMACINML_00379"
CDS 110851..111555
/locus_tag="DMACINML_00379"
/inference="ab initio prediction:Prodigal:2.6"
/codon_start=1
/transl_table=11
/product="hypothetical protein"
/protein_id="Prokka:DMACINML_00379"
/translation="MQNILLKQFLEERKKYKNGIYHYTQVNFVSYNSNHIEGSTLSEE
QTRYIYDRNSFLANENQIINTNDILETKNHFLAFDFILDSVFDEINEAYIKKLHSIVK
NNCSDIEIIGEFKQRQNYVGLKTSAPHLVKEHLEKLFQGYKVHNIEDIIDFHFHFEK
IHPFEDGNRVRGRLLMFKECLKNNITPFIVDEEHKLFYYRGLKNYENQKGLIDTYLS
CQDKYKEILNYFQIVC"
gene 111609..112328
/locus_tag="DMACINML_00380"
CDS 111609..112328
/locus_tag="DMACINML_00380"
/inference="ab initio prediction:Prodigal:2.6"
/inference="similar to AA sequence:RefSeq:ABS43939.1"
/codon_start=1
/transl_table=11
/product="methyltransferase domain family protein"
/protein_id="Prokka:DMACINML_00380"
/translation="MNNAAFWENIFSNKEWGKYPSENLRIFIARNFYNVKRNREIRIL
ELGLGTGANLWFCAREGFRVSGIEWSKTGVERFRKRLNDENLSSQIDEIKIGDYEQKL
DEFKDESFDCIIDSCSLCCNNFEKTKHIFDKAILKLPNGKFFSSTIAKGIVGYDKNK
EDFQLPNDGIYTHVGMIRFSNKEDIQKLYKNDNFKQTSCLKVQSIEDNGALIDKLFIE
GEKNIMGGGNSKLLQGVENE"
gene 112321..113286
/locus_tag="DMACINML_00381"
CDS 112321..113286
/locus_tag="DMACINML_00381"
/inference="ab initio prediction:Prodigal:2.6"
/inference="similar to AA sequence:RefSeq:SQE24790.1"
/codon_start=1
/transl_table=11
/product="putative protein involved in methicillin
resistance"
/protein_id="Prokka:DMACINML_00381"
/translation="MSRIFLEDFLKNHKNYSYLLDDIYLNKKYASLYGEVFEFSYQKE
VKLFKMIAIKEKIPNTKFYDLQSPYGGGIYCNVNDKNFIKEALENLKLKAVEQNIIA
FFIRFHLFDENLKNYHYLLPFFTKNKETIIVNTNENIENIRTNYSPIRSYIKKARKE

```

```

INIEFAQKEDYKDFFKLYTHTMQRNNADKFYFFNERYFEKLFNFKESIILKASLDNKI
LAFASFFLCGDFSYYHLSANSLKSNANAALLDFFFYANQNACKFCFLGGGVQNETL
FKFKEKFSTLRANFYVGGMIFNKEEFDLKNKFTNKYFLKYRFDD"
gene      113703..114707
          /gene="neuB2"
          /locus_tag="DMACINML_00382"
CDS       113703..114707
          /gene="neuB2"
          /locus_tag="DMACINML_00382"
          /EC_number="4.1.3.-"
          /inference="ab initio prediction:Prodigal:2.6"
          /inference="similar to AA sequence:RefSeq:CAL35440.1"
          /codon_start=1
          /transl_table=11
          /product="N-acetylneuraminic acid synthetase"
          /protein_id="Prokka:DMACINML_00382"
          /translation="MKKALIIAEAGVNHNGDLNLAKKLEVAAKSGADFKVQSFKAEL
LCVSKNAKKATYQLKTTAKDESQLEMIIKLELDFNAHQLLISHAKQCGIAFLSTPFDL
ESIELLDDLGLVFKIPSGEITNLPYLKKIAKLNKKIILSTGMSNLGEIEAALEVLCK
EGTQRANITLLHCTTEYPAPFDEVNLKAMQTLKNAFNLDVGYSHTKGIHISLAAIAL
GASVIEKHFTLDKNMSGPDHKASLEPDELQELCTKIREIESALGDGKQASKSERKNI
EIARKSLVAKKKIKKGEIFSEENLTKRPASGISAMRYDEYLGKKASKDYEEDELIHE
"
gene      114700..115857
          /locus_tag="DMACINML_00383"
CDS       114700..115857
          /locus_tag="DMACINML_00383"
          /EC_number="5.1.3.14"
          /inference="ab initio prediction:Prodigal:2.6"
          /inference="similar to AA sequence:RefSeq:ABS43139.1"
          /codon_start=1
          /transl_table=11
          /product="UDP-N-acetylglucosamine 2-epimerase"
          /protein_id="Prokka:DMACINML_00383"
          /translation="MSKRKICIVSATRAEWYLLKNLCLCIEIQNDEDLELQIIATGAHLS
PEFGLTYKEIEKEFKIAKKIPILLASDDKISLCKAMALANIGFSEAFESLKPDIIVIL
GDRYEMLSVASVCLMMNLPIAHLGGELTLGAIDDSIRHSISKMAHLHFVSTQTYKNR
LLQLGEEENRVFNVGSLASPIIKNINFLDKNELAKVLEFDLEQNIYLITYHPVTLNLQ
NSKKEIDILLKTLDKLNNASLIFTKANADENGLLINEILKDYCEKNPKKAKLFDNLGS
QKYL SIMKIAKAMIGNSSSGISESPFFKTPCINIGSRQKGRRLRTQNIIDCFENLDQA
FEKLESKDFKQALYHFKNPYENDKNPNIIIKTCLKNANLDTILQKKFIDLR"
gene      115862..116893
          /locus_tag="DMACINML_00384"
CDS       115862..116893
          /locus_tag="DMACINML_00384"
          /inference="ab initio prediction:Prodigal:2.6"
          /inference="similar to AA sequence:RefSeq:CAL35442.1"
          /codon_start=1
          /transl_table=11
          /product="putative sugar-phosphate nucleotide transferase"
          /protein_id="Prokka:DMACINML_00384"
          /translation="MDINKLKLTPDSSIEEALKVVGQERVLGIIVDKKDNFLGVISD
SNIRKALIKGNLQSKIKDIYTKNPITIKENTSKNELLKLSAKTDIYDFPVLNDKKEV
ISIKSISLLNRQVNSNFVIIMAGGLGTRLKELTKDTPKPMKLVGKKPILESIVQRLK

```

EQNFENFIFCVNYKKQIIEDYFKKGKDFGIKISYIKERKKLGTAGALSLIKQDFKESF  
 IVMNADILTELDNFNELLKAHKDSKALMSVCVREFEQQIPFGVIEQNKGFITNITEKPV  
 QKFLVSAGIYVCEPEILELLNKNEYLDMPELIKLAMQKGRVNTYLIDHYWIDIGRLDE  
 FVKANEEFK"

gene 116890..117795  
 /locus\_tag="DMACINML\_00385"

CDS 116890..117795  
 /locus\_tag="DMACINML\_00385"  
 /inference="ab initio prediction:Prodigal:2.6"  
 /inference="similar to AA sequence:RefSeq:CAL35443.1"  
 /note="hypothetical protein Cj1330"  
 /codon\_start=1  
 /transl\_table=11  
 /product="hypothetical protein"  
 /protein\_id="Prokka:DMACINML\_00385"  
 /translation="MKVLIIGFGSIGKKHFLALNELGFLVDVLSKSYEFSHFEGKNFR  
 LFKDLEELNLQDYDLFIANITTSFKTLEFLDQNVKEKIIIVEKPLFQKDMEFIPSN  
 NNQIYIAYLLRFHPMIQDLKQLIDEKEVYFAKFCNSYLPNWRKLDYRQNYSAKKELG  
 GGVMLDLSHEIDLAFYFFKELSLKFSQNLKISELEITSDDFTFLALSANTSIIHIELD  
 YFSKLTQRKILFHTKENSFEADLVHNKLNIIYDKTNNFKSKTYENDTFKTLQNMKYKAIL  
 EKDQNLCTLEEARRVRLCDEARNG"

gene 117788..118495  
 /gene="ptmB"

CDS 117788..118495  
 /gene="ptmB"  
 /locus\_tag="DMACINML\_00386"  
 /EC\_number="2.7.7.43"  
 /inference="ab initio prediction:Prodigal:2.6"  
 /inference="similar to AA sequence:RefSeq:CAL35444.1"  
 /codon\_start=1  
 /transl\_table=11  
 /product="acylneuraminate cytidyltransferase (flagellin  
 modification)"  
 /protein\_id="Prokka:DMACINML\_00386"  
 /translation="MGEILCTICARGGSKGVKNKIRKINDLEMIAYSIIQAKNSKLF  
 KHIVISTDSEEIAKIALKYGGEVFFKREHLASDTAAKIPVMRDALLRSEEFKQCFD  
 ALIDLASAPLRSSSDIIKAFETFCQNQNDNLITAVPARRNPYFNLIIEVQDGKVVVSK  
 SGNFTTRQSAPKCYDMNASIYIFKRDFLLQNSVFGENTGLFIMDESTAFDVSDELDF  
 KIVEFLIKEKNLQAKDF"

gene 118495..119265  
 /gene="ptmA"

CDS 118495..119265  
 /gene="ptmA"  
 /locus\_tag="DMACINML\_00387"  
 /inference="ab initio prediction:Prodigal:2.6"  
 /inference="similar to AA sequence:RefSeq:CAL35445.1"  
 /codon\_start=1  
 /transl\_table=11  
 /product="putative oxidoreductase (flagellin  
 modification)"  
 /protein\_id="Prokka:DMACINML\_00387"  
 /translation="MLENKIIFVAGACGRIGKALCKKILQNKGIAILADINENHLSIL

KTELENEFKKELLSRLDITSKESLNYAIDQAFKKYSKIDGFVNSSYPVKGDWGKIAY  
 YEASYEQICESLNLHLGGFILASQEFVKFFKKQSYGNIINLSSIMGVFAPKFENYENT  
 AMQSSLEYSVIKAGINHLGAWLAKELFNTNIRVNTLASGGILDNQANIFLEKYRKKCA  
 SKGMLDAEDICGLTVFLLSDESKFITGQTLVVADGWGL"

gene 119265..121118  
 /gene="maf-2"  
 /locus\_tag="DMACINML\_00388"

CDS 119265..121118  
 /gene="maf-2"  
 /locus\_tag="DMACINML\_00388"  
 /inference="ab initio prediction:Prodigal:2.6"  
 /inference="similar to AA sequence:RefSeq:SQE24803.1"  
 /codon\_start=1  
 /transl\_table=11  
 /product="maf-2"  
 /protein\_id="Prokka:DMACINML\_00388"  
 /translation="MNNELFLKNTQALFEVDQILAYELRRIKHCNFALQGDNLENLN  
 IIHLSSKESIYKNPYEELSNNLTFKQEQYSKYPTLFFYGLGSGAFYKALLTNQNHKQL  
 IVFESELELFYLAFHLDFDSKDIRNERLILFYTPNLNTTQLNALLNHKKIKFSIKTYD  
 FHIHSEFYLSHYKDIIQNLNQSLIEIKFIVLAYGNDPKDISHIGIEHTLKNLNTLVYG  
 SVFQHFLLKYNRAKSKNAIIVSTGPSLTKQLSLLKEYASKATIFCADSSYPILARAGIK  
 PDYVLSLERRVAATSEFFNDFKEFDKDILFLITSVTHENTLKYLEKNHRNYMLVLRPL  
 LFSSHLKLDDFGYLGVM SVANMAYELAVALRHENIILIGDLAYDDLGHSHPKDHIY  
 GEQGDKFQDKLSVRAYGGKGLVKTQLSWQLFRQSF EKDIPLVKEKQLITTYNCTEGGA  
 RIEGSIKPFKELCESILDTNLEKPFKNDFKLEPKEAQKILEKTKKHLNQQVKISKNL  
 IEEIQNKLKTLPNILNEKDINLDFKLLKLELDFQSLATKMKSYGLMSELLQALVFHQ  
 ECDLLKLVQPCNKQEEEQKQILLCLKYHHEKFSELILYMQIQNELIEKYI"

gene 121130..123085  
 /locus\_tag="DMACINML\_00389"

CDS 121130..123085  
 /locus\_tag="DMACINML\_00389"  
 /inference="ab initio prediction:Prodigal:2.6"  
 /inference="similar to AA sequence:RefSeq:ATM02447.1"  
 /codon\_start=1  
 /transl\_table=11  
 /product="PseD protein"  
 /protein\_id="Prokka:DMACINML\_00389"  
 /translation="MTFTEEQKNRYKKNFNALSDNLILKKDLAKLSKSKKFKILQGQD  
 PLDINLLNTFTHKKIYNKPLEELNALLASYNEKYILYPVLYFYGLGNGILYKALCQNP  
 KLQHIIIFENDIELIFTSLHLIDLSQEIKEGKIHLSSKKNKEQFLSIFNVQPFLNFL  
 RYVFLELHSNYYESEHDEIILNLDIHHAIKEAVCVRGNNPKDALQGIEQFIFNLPNM  
 LTHPNAKELINTRKGLDKNAIIVSTGPSLTKQLSLLKEYASKATIFCADSSYPILARA  
 GIKPDYVMMLERTDMTAEFFNHDFGDFDKGIIFCIAALVHPKAIEYLEKQNRTYILIE  
 KSLHFESYMKLHSFGYLNLVSSVAHMAYELAMALKFENIIFIGQDLAYAKDGCSPKD  
 YQNSPTYETNMYEHLSTKAYGGKGEVKTHFVWNMFRTILEKHIINTPKTIKVVNCTEG  
 GARIEGSIKPFKELCENLLTNDLNKPFPSLNLPSQDKQNERMLKAFYKIQKSIQNC  
 KLELFVLEKQQSILEKINQEEFKNLSYDDKELAQGIIEDIDTLKNEIEKIHTFYEDLG  
 EILQPLYCQFEFNLAKIYVLNPLTKEDWVNKTLWIKHEHLDWIAYILIHKAQKQALQ  
 SSILPLENELLQRNFKHLLDKIKRKT"

gene 123082..124992  
 /locus\_tag="DMACINML\_00390"

CDS 123082..124992  
 /locus\_tag="DMACINML\_00390"  
 /inference="ab initio prediction:Prodigal:2.6"



```

/inference="similar to AA sequence:RefSeq:AIW10510.1"
/codon_start=1
/transl_table=11
/product="PseE protein"
/protein_id="Prokka:DMACINML_00390"
/translation="MKTDDIFEKNLLSLSGKEYENLIKLLKKIKESKKSPLFDAKDP
LNLNIIENSTKEKIYQNPLKELESKIDLIQKKYLKYPVLFYIGINGFLYKALLQNP
FKRIIIFEKEIELIFLALNLADFTQELKKGRLIIISSEMNDTKANSLFSLPEIKLLF
KSYFLDLHSDFYEKYSKDIIKINNINKNMIIFFSLRQGNPKDALQGVDQFVRHIPHM
ITHPSLSELIKKRYKKAKNAIIVATGPSLQKQIPLKKYHKKASIFCLDASYSILHEN
DIKPDYVLSLERVVATSEFFNDFKEFDKIDILFILLTLTHPQTIKYLEANKRSYILTP
RDLPFQSISIKHLKEFSSLNMGMSVAHMALVLAYHLGHENVILIGQDLAFGKDGSSHSG
YGRGEELAKKETQALPQTKVKAYGGKGLVKTITWELFIKVFENITTIINAQKNCTIY
NATEGGARIGGTIEKPFKELCENLLDKELKKPLTKVNKLSRKEQNLLLLKSYKQIKTF
IKRSEKIAKELRKTGKQIRNLQEIQKQYKLEQISKNIIDEIKTKLASSNYAYLAEVLG
PSVYHAESSLGELYLQNISNESDKQNKLIAWIYAHEAWIDEVHNLIIQLNSVLKNAI
PLRDMVEKRKLV"
gene complement(125014..126738)
/gene="flaB"
CDS /locus_tag="DMACINML_00391"
complement(125014..126738)
/gene="flaB"
/locus_tag="DMACINML_00391"
/inference="ab initio prediction:Prodigal:2.6"
/inference="similar to AA sequence:RefSeq:ADC28911.1"
/codon_start=1
/transl_table=11
/product="flagellin"
/protein_id="Prokka:DMACINML_00391"
/translation="MGFRINTNVAALNAKANSDLNSKALDQSLARLSSGLRINSAADD
ASGMAIADSLRTQASTLGQAINNGNDAASILQTADKAMDEQLKILDITIKTKATQAAQD
GQSLKTRTMLQADINRLMEELDNIAINTTSFNGKQLLSGSFINQEFQIGAQSNTIKAS
IGATQSSKIGVTRFETGTQISDSGTAQITIKNYNGIEDFKFQSVVISTSVGTGLGALA
EEINKYADKTGVRASFNVQTVGAMAITKGNTTDDFTINGVKIGKIEFEAGDKNGSLVA
SINAVKDTTGVEASLSDGRLVLTSTREGRGKIVSGFTPSMGILAEQAENYGRSLVK
DGRDIAISGTGLSAAGFEGEQMVSQSSVSLRETKGQISAQIADAMGFNNYEGGRFLA
DYSSISSYMSAAGSGMSAGSGFSVSGSKNMSVMLSANVGFVGNQSMLSNFYNVSEGS
GFSAGSGQSQAQMKATALGSTDKTAGVTTLKGAMAVMDIAETATINLDQIRADIGSV
QNQLQVTINNITVTQVNVKSAESTIRDVDFAAESANFSKYNILAQSGSYAMSQANAVQ
QNVLKLLQ"
gene complement(126834..128681)
/locus_tag="DMACINML_00392"
CDS complement(126834..128681)
/locus_tag="DMACINML_00392"
/inference="ab initio prediction:Prodigal:2.6"
/inference="similar to AA sequence:RefSeq:APU79916.1"
/codon_start=1
/transl_table=11
/product="motility accessory factor"
/protein_id="Prokka:DMACINML_00392"
/translation="MSILEKNIQALLSGVNEPLGNKLLNFIQTKTCSRFSMDGNLNIY
DKNNDIFMYENLEELNYFYQNILEKTLRYPFICIYGIGNALLIKNLAKHYRHLVFE
EIELFILALSALDLSEELCSGKIYLVVCEPKMELQLSILFDQRDIFEWLNLYEMFIN
CNFYKLYYQDTISKTDKCIDNIFLVIRNFDPNQDITTCYKQFLQNIHLLQNIPIFQ

```

```

RLLSERKAKFDTAVVVSAGPSLHKQLSLLRQYQENVVIFCADGALNMLENEGIVADYV
LNLDIKDLTVKFFNCSKPLDYSKTIAVLAANTHPNVVVKHVQTKLPCCVALRDKYLYEQ
FHLDDFGYIDTGTHTVSHFSYTLALALGFKNIVMIGQDLAFDEKGNSSHKDFVFGKEKF
HTLNMPTLKVLAYEGKGEVLTHIAWNDYRIKLEYLIARNNDKAVFYNATEGGAYINFA
KNISFKECCEKFFTQKKPSLNIPKFTYNRSLKFLSKIFLHLKNDFQSAQDILRDAHL
LNNALINVLNVKKTLPDLFLQNIYQSITDFDFILDNNTFIQDDVLKGTFGYRGNFLSE
VIKKRFEDETHYFLSLIHAYQKWLEKFIKLEMKSFIIRDAMLEYEKLI"
gene      complement(128691..129935)
          /locus_tag="DMACINML_00393"
CDS      complement(128691..129935)
          /locus_tag="DMACINML_00393"
          /inference="ab initio prediction:Prodigal:2.6"
          /inference="similar to AA sequence:RefSeq:ALJ18007.1"
          /codon_start=1
          /transl_table=11
          /product="carbonic anyhydrase"
          /protein_id="Prokka:DMACINML_00393"
          /translation="MIVNKTYEIDSCDDVELGIKRESKLEFKLCFDDKEMKALVFIV
PGLGGDANENYREHLAEFVANEFVAVVSVNYHCIGNRPQTGSTFYLDIDDKLILQTS
CETLGIKINPKLNSLEDLNF TLKKVD TLEERKTQRKIVSNFKLSIHL SLQPAKNEY
QNFQVMQAQDL LNAALYLKAHAPFNTMGGGMPVIMIGSSHGGYLAHLAAKFAPWLVDG
VIDNSSYAKFLWRLIGFGKEIDFTKYCYFGTAIFFKHIHIYCSDKTFWTSNSSNNFF
SIPRRMIRYILEPNHIENQANYPKPYTSYHSFYDKEIAPPDEKLELYKYLKQDFDFA
ELHMIKNDQIDGKFIKNDLHGMGMSIKTLISKELPCMLEKILSNSRKEWKNKSISYP
CDGLIYHFSEKDNKINLDITKT"
gene      complement(129922..130449)
          /locus_tag="DMACINML_00394"
CDS      complement(129922..130449)
          /locus_tag="DMACINML_00394"
          /inference="ab initio prediction:Prodigal:2.6"
          /inference="similar to AA sequence:RefSeq:CAL35455.1"
          /codon_start=1
          /transl_table=11
          /product="putative periplasmic protein"
          /protein_id="Prokka:DMACINML_00394"
          /translation="MKRAFTILELVFVIVILGILAAIALPKFSSSRDEAEVSKSLNLL
KTLINDISIYALKNSDLSTMNFMNSVSGVENVDLKNFTGIKEVNFVGEDKECIKLIF
IDKNDFVLMGISSNEASKNAIINIANNPKQEFQNLDF TSSSKNKACVALSKNENFKNL
ASQTYILIGGFDDSK"
gene      complement(130452..131459)
          /locus_tag="DMACINML_00395"
CDS      complement(130452..131459)
          /locus_tag="DMACINML_00395"
          /inference="ab initio prediction:Prodigal:2.6"
          /inference="similar to AA sequence:RefSeq:CAL35456.1"
          /codon_start=1
          /transl_table=11
          /product="putative glycoprotease"
          /protein_id="Prokka:DMACINML_00395"
          /translation="MKNLILAIESSCDDSSIAVMDKDTLECKFHKKISQEMEHNVYGG
VPELAARLHSEALPRILEQCKGYFDKLCIAVVTNEPGLSVSLLSGISMAKTLALSLN
LPLMAINHLKGHIYSLFLEESICLDMGILLVSGGHTMVLYLGKDGKIEILARTNDDSF
GESFDKVAKMMNLGYPGGVLIENLAQKAKLKNIHFNIP LKHSKELAYSFSGLKNAVRL
EILKHENLDEDIKAETIAYGFENAACEHIMDKLEKIFNLYKFKTFGVVGGASANLNLRS

```

```

RLQNLCEKYQSKLKLAPLKYCSDNALMIARAGVDITYKRKEFVELEEEIILSPKNKNFLR
I"
gene      complement(131456..132850)
          /locus_tag="DMACINML_00396"
CDS      complement(131456..132850)
          /locus_tag="DMACINML_00396"
          /inference="ab initio prediction:Prodigal:2.6"
          /inference="similar to AA sequence:RefSeq:CAL35457.1"
          /codon_start=1
          /transl_table=11
          /product="putative periplasmic protein"
          /protein_id="Prokka:DMACINML_00396"
          /translation="MKFFISIIFFISGLFALDLEFSVGENGKSLDDNNTVLIFGGIQG
DEPGGFHAASLLLSDYNITKGKIIIVAPNLAFDSIIKRSRGNNGDLNRKFASLSPKDPD
YQTVQRIKELILLPEVSMVINLHDGWGFYKPTYIDAMQNPKRWGNSSVIDTSEINASK
YPNLEGIATQTVNSVNASLADPKHAYHLKNTKTQELGDTEMLKALTYFVISNHKAFA
NEASKNLPVNL RAYYHLLAIENYLKTAGIEFTRTFELTPQGVDKAINQELVKKLFDK
ILLSLKNPRQVINYPFPINKELNYNTSNELTAVIAENNSFYIQYGNRFQTRLYPEYL
EFSNPFDKVTLQVDGNETIVNFGTKLQVKENFIVPRIKGV RVNIIGFDHGRDESMLV
SKKNMQKPYSLDMAGKIYRVEFYELRGANLQQFLEDSVESKLIKNAKILDSTLKTAR
SKDKFIGSILVEFE"
gene      complement(132847..133923)
          /locus_tag="DMACINML_00397"
CDS      complement(132847..133923)
          /locus_tag="DMACINML_00397"
          /EC_number="1.1.1.267"
          /inference="ab initio prediction:Prodigal:2.6"
          /inference="similar to AA sequence:RefSeq:CAL35458.1"
          /codon_start=1
          /transl_table=11
          /product="1-deoxy-D-xylulose 5-phosphate reductoisomerase"
          /protein_id="Prokka:DMACINML_00397"
          /translation="MIVFGSTGSIGLNALKLATLKNIKISALACGENISLLNEQIEQF
KPEFVAIKNSKDKHLVKHDKVFGQEGLEEILSLCEDDLLLNAIIVGFAGLKSTLKAKE
LGKKIALANKESLVVAGKFLKGAKFLPVDSEHSALKFLLLEGKKDIAKLYITASGGAFY
KHKIKDLSHVSVKDALKHPNWNMGSKITIDSATMANKLFEIIEAYHLYDFKNIDALIE
PKSLVHAMCEFKN GASTAYFSRADMKLSISEAIFSKHDSKILEPVDFVKLSSLKFYKI
STKKYPIFKLKNELLNPNDLGVIINAANEIGVQNF LDNKIQFLDIAHVIFKALDHFGV
PKISSIDEVFEYDYKTREYLRGMK"
gene      complement(133920..134648)
          /gene="cdsA"
          /locus_tag="DMACINML_00398"
CDS      complement(133920..134648)
          /gene="cdsA"
          /locus_tag="DMACINML_00398"
          /EC_number="2.7.7.41"
          /inference="ab initio prediction:Prodigal:2.6"
          /inference="similar to AA sequence:RefSeq:CAL35459.1"
          /codon_start=1
          /transl_table=11
          /product="phosphatidate cytidyltransferase"
          /protein_id="Prokka:DMACINML_00398"
          /translation="MFNAARIIWGVVMAIAVILIALIDQFIINFIVFAFILYLAFNEA
KKLFNLEDVSIIPLVLAFILGTISEIPLAFGALAALLVLGYLVYKKAPSLKAVWIYLY

```

PSLPVLALWQVYLDDGMFALFWLIAIVAICDSAAYFIGKLLGKTPFSQTSPNKTLEGV  
 IGGLVCASILGTLIGIFVYSFWLSLLCSFFVAFFAVIGDLLESYFKREAGVKDSGLI  
 PGHGGILDRIDAVIIAAFVMVALL"

gene complement(134657..134995)  
 /locus\_tag="DMACINML\_00399"

CDS complement(134657..134995)  
 /locus\_tag="DMACINML\_00399"  
 /inference="ab initio prediction:Prodigal:2.6"  
 /inference="similar to AA sequence:RefSeq:CAL35460.1"  
 /codon\_start=1  
 /transl\_table=11  
 /product="putative coiled-coil protein"  
 /protein\_id="Prokka:DMACINML\_00399"  
 /translation="MPVSPIGNMNFVNQNMAYPATQASNELAKEGFAASLNMAAFNEK  
 EKALNKLEKVNQEQEIKKEIKEKAEQEEKKKKQKQEAKKDDKDENLEEQTTEASFKNA  
 QSIHHIDISI"

gene complement(134998..136305)  
 /locus\_tag="DMACINML\_00400"

CDS complement(134998..136305)  
 /locus\_tag="DMACINML\_00400"  
 /inference="ab initio prediction:Prodigal:2.6"  
 /inference="similar to AA sequence:RefSeq:CAL35461.1"  
 /codon\_start=1  
 /transl\_table=11  
 /product="putative fibronectin/fibrinogen-binding protein"  
 /protein\_id="Prokka:DMACINML\_00400"  
 /translation="MKYTELMQLQKFFSQFKKIDFIKRVNDNILELSFDKQRFIFDLT  
 RGMSAIYTAKLMSKNYNAPDFMLKKYFNNAFIKEVKLLQGNRILCFSVRVDKAYKSY  
 ESKIYFEFTGKNTNVIITDEKDLIEALRHIDKSYRVVKNVLEALKPKYMDEKFE  
 IKNFNDYFTQKFEILHANKIKQIQTLKLAQIDKKIENLEELYLALDKEELLLDQALNL  
 RKQADILFANLSILKEYEREFELDDFEGKKVKFKLDLSPKESANLFYKNAKKLEQKAR  
 NLNLQRENLEKLDFAKGLKEMLSKAKNEFELEILLPKKSTKKNQENKQDSGIANFYF  
 NEFKICVGKNEKGNENLLKSAKKDDLWLHVRDIPSSHVLIISNKQKISEEVIEFSARL  
 CVNFSGLKKGSYWDYTLKNFVKVQKAFVKYTNFKSINITKD"

gene 136368..136943  
 /gene="mobA"

CDS 136368..136943  
 /gene="mobA"  
 /locus\_tag="DMACINML\_00401"  
 /inference="ab initio prediction:Prodigal:2.6"  
 /inference="similar to AA sequence:RefSeq:CAL35462.1"  
 /codon\_start=1  
 /transl\_table=11  
 /product="putative molybdopterin-guanine dinucleotide  
 biosynthesis protein"  
 /protein\_id="Prokka:DMACINML\_00401"  
 /translation="MKLENLNCVILCGGKSSRMGEDKSKLIFKNQTLTQFQVEKFSKI  
 FKNVYVSAKEDKFGAKFKLIKDCPEFEIYSPMLALYSILSNFKDEFVILSVDSPNLS  
 DKELLKMLAFLEQDYQIIIAKTPSHKHPLCGFYHSSVAYLCKELLEKNEQKIALLSK  
 AKTHFVEFEDETPFLNLFYQEYEQFKSEYE"

gene 136940..137935  
 /gene="pldA"

/locus\_tag="DMACINML\_00402"

CDS 136940..137935  
 /gene="pldA"  
 /locus\_tag="DMACINML\_00402"  
 /EC\_number="3.1.1.32"  
 /inference="ab initio prediction:Prodigal:2.6"  
 /inference="similar to AA sequence:RefSeq:A0H52353.1"  
 /codon\_start=1  
 /transl\_table=11  
 /product="phospholipase A1"  
 /protein\_id="Prokka:DMACINML\_00402"  
 /translation="MKKILFLIFFYSLVFCDDFEQALEFEKKGQYEKAMQIYKKLALQ  
 NSSKQEFQENNASLNSNTKHEMQATQKAASKEDFSRIALENYLGEDSSFNPLGISSY  
 KMNYFLPFAYSFGSLGGENRKTEMKFQLSIKKRLFEDLLGLGEKYYVGYTQTSWWQNY  
 KHSSPFRETNYQPEFFVDIPLHFEEYKFLNLRVVGILHESNGKGDENLESRSWNRIYA  
 SSVFLYQRFLFVPRIWYRIPENSEDDDNPEITHYMGNFDINMGYLGNDYFNLMLRNN  
 LDFHDNKAHVQVDIGYDIFDNGIYWYLQYFNGYGESLIDYNKRLQRLSTGFLISY"

gene 138068..139036  
 /gene="ceuB"

CDS 138068..139036  
 /gene="ceuB"  
 /locus\_tag="DMACINML\_00403"  
 /inference="ab initio prediction:Prodigal:2.6"  
 /inference="similar to AA sequence:RefSeq:CAL35464.1"  
 /codon\_start=1  
 /transl\_table=11  
 /product="enterochelin uptake permease"  
 /protein\_id="Prokka:DMACINML\_00403"  
 /translation="MLFKHLFSLNILLILLVIFGILSLFIGVIRINLDDIFLSLQTL  
 EIILLTRIPRLIAILLTGMSLSICGLIMQQLTQNKVSPPTAGTMDCAKFGILISLIF  
 FAGASFFTQALIASIFALLGSFIFIQILRKIKLKDVIVPLIGLMFGGIINAITFFFA  
 YALNYIQNIQGWLQGSANVMQGNLYELLYISLPLFILAYFLAHKITIAGMGEDLALNL  
 GVSYNTILFLGLIIVSIITSVIVSVGVIPFLGLIIPNLVAIYRGDNLKKNLIIYIALC  
 GALFLLICDIISRLVIFPFEMPLSITAGVLGSLIFIFLLLKRKTYA"

gene 139029..139967  
 /gene="ceuC"

CDS 139029..139967  
 /gene="ceuC"  
 /locus\_tag="DMACINML\_00404"  
 /inference="ab initio prediction:Prodigal:2.6"  
 /inference="similar to AA sequence:RefSeq:CAL35465.1"  
 /codon\_start=1  
 /transl\_table=11  
 /product="enterochelin uptake permease"  
 /protein\_id="Prokka:DMACINML\_00404"  
 /translation="MRKKILILSFITLIMALVFIFAGLKDFEYALKNRSLQIAAIVI  
 VAICIAVSTIIFQTLCKNKILTPAIIGLDSLYMLLQSALVFSLSANLSVYKNDINFL  
 ITLACMVVFSGLYKILFSSDKSIYLMILLGLIFGTLFSTLSSFFEILIDPDEFMVIQ  
 GRMFASFDNVAFDVLALAYIVTLLSFVWIFRYMKFLDPLSLGKDLINLGINYQKISK  
 HLMIIIAILTSISTALVGPITFLGLLVNITYELFKTSKHSILLLACVLISILALLGG  
 VFFVSRVFDYNTTISVIINFLGGIYFIYLVLKGKGL"

gene 139964..140719  
 /gene="ceuD"

CDS /locus\_tag="DMACINML\_00405"  
 139964..140719  
 /gene="ceuD"  
 /locus\_tag="DMACINML\_00405"  
 /inference="ab initio prediction:Prodigal:2.6"  
 /inference="similar to AA sequence:RefSeq:CAL35466.1"  
 /codon\_start=1  
 /transl\_table=11  
 /product="enterochelin uptake ATP-binding protein"  
 /protein\_id="Prokka:DMACINML\_00405"  
 /translation="MIRLQNITKCYDKKAIISDLSIDFHKGKITSIIIGANGAGKSTLL  
 ALASRLIKPDSGRIYIDGMDLTLYKEQDLAQKISILKQQNHINLRLKVEELVAFGRFP  
 HSQGRNLNANDKIKIDEALEYMGLNSLRNEFLDSLGGQKQRAFIAMIIAQDTEFIMFD  
 EPLNNLDMKHSVQIMQLMKNLVKDFNKSIAVVLHDINFASIYSDEIIALKNGKLLKQG  
 LKDEIIHEDVLRQIYDMDIPVSQIDGKKICIFY"

gene 140734..141723  
 /locus\_tag="DMACINML\_00406"

CDS 140734..141723  
 /locus\_tag="DMACINML\_00406"  
 /inference="ab initio prediction:Prodigal:2.6"  
 /inference="similar to AA sequence:RefSeq:APA81643.1"  
 /codon\_start=1  
 /transl\_table=11  
 /product="Enterochelin uptake periplasmic binding protein"  
 /protein\_id="Prokka:DMACINML\_00406"  
 /translation="MKKSLVFAFFAFFLSLILTACDSKSNENNASAAKTSTTVKVIP  
 ISMSDEGDSFLVKDSLGENKIPKNPSKVVILDGILDTFHALRLNDKVAGVPAKNLPK  
 YLQQFKDKPSVGGVQQVDFEAINALKPDLIIISGRQSKFYEKLEIAPTMTFVGLDNAN  
 FLSSFENNVLSVAKLYGLEKEASEKIADIKNEIEQAKSMVDEDKRALIVLTNSNKISA  
 FGPQSRFGIIHDVLDGINAVDENVKVGTGKINSSEFILEKNPDYLFVVDNRNIIVGNKE  
 RAQGILDNALVAKTNAATNKKIYLDPEYWYLASGNGLKMTMILEVTNAIK"

sig\_peptide 140734..140796  
 /locus\_tag="DMACINML\_00406"  
 /inference="ab initio prediction:SignalP:4.1"  
 /note="predicted cleavage at residue 21"

gene 141888..142442  
 /locus\_tag="DMACINML\_00407"

CDS 141888..142442  
 /locus\_tag="DMACINML\_00407"  
 /inference="ab initio prediction:Prodigal:2.6"  
 /inference="similar to AA sequence:RefSeq:SQE24824.1"  
 /codon\_start=1  
 /transl\_table=11  
 /product="integral membrane protein"  
 /protein\_id="Prokka:DMACINML\_00407"  
 /translation="MINKNKLFRQIHIYVSLFFLPCAVLFALTGIVYIFGADQDTGLK  
 VENYKLVKNIEVGKEKDALIQYLQENNLKIPSNTEVIESKDKGITIGGAHYSANIALV  
 AQNEYAITLKTRSLLDGMIMLHKDKGAWYFSVLSIGFGIALFLLYISGLIITLFASKK  
 DRQKQLATLGAGVVITIFLAYLSL"

gene 142510..142600  
 /locus\_tag="DMACINML\_00408"

tRNA 142510..142600  
 /locus\_tag="DMACINML\_00408"  
 /product="tRNA-Ser"

```

/inference="COORDINATES: profile:Aragorn:1.2"
/note="tRNA-Ser(gct)"
gene complement(143077..144909)
/gene="nrfA"
/locus_tag="DMACINML_00409"
CDS complement(143077..144909)
/gene="nrfA"
/locus_tag="DMACINML_00409"
/EC_number="1.7.2.2"
/inference="ab initio prediction:Prodigal:2.6"
/inference="similar to AA sequence:RefSeq:CAL35469.1"
/codon_start=1
/transl_table=11
/product="putative periplasmic cytochrome C"
/protein_id="Prokka:DMACINML_00409"
/translation="MKKNFLRLAIVVLVLLIVGVLWLNNDINQKKEDEANKNAIAANA
DFSLLSDDNPNFERWGWKVFPEQLKMYLTVEEEEPKATEFGGNLSYSKLRFPQLTILW
AGYPFSLDFNEERGHFWVQVDQMKTARNNKDFLNAHGLKAFKQGPAACMNCHSGWTPW
LINNIAGKDFVAFNSTNYWTMIKNVPAVDGIVENSPEHAGPHGGKRMGVTCADCHNPN
DMSLRLTRPAAINALVARGYEKDPVQGVKATREEMRTLVCSSQCHVEYYFKPTGEKVKV
MGETIVDDSSKKWWDGTQKNYDEYEFWRDGNPKPEIEANGIMLTFPWSEWKKGQPFRI
EMLDDYIEKVRNVFGADFTKLTGAPIIKIQHPESELYSGGVHAANGVSCADCHMPYV
REGAKKISQHNITSPLRDINSACKTCHKQSELYLRAQVRDIQNSVAHDQRTAEYAIVS
LIMDTKKLRDELGNMEKFQTDGKADASKISEELKEVLELHRKSQMRADVFNAENSTGF
HNPRESRMLLQAVDMAKTGQIKLIEIANANGINDFKTSNLGFEDIQKFNPGELYYKV
DVNGHKAGERYYGDEIEVNGNPPKELLEHDKNLAPYNYQVIDKK"
gene complement(144925..145416)
/gene="nrfH"
/locus_tag="DMACINML_00410"
CDS complement(144925..145416)
/gene="nrfH"
/locus_tag="DMACINML_00410"
/inference="ab initio prediction:Prodigal:2.6"
/inference="similar to AA sequence:RefSeq:CAL35470.1"
/codon_start=1
/transl_table=11
/product="putative periplasmic cytochrome C"
/protein_id="Prokka:DMACINML_00410"
/translation="MKKSLNLFGIFLVLLFVFFAVGFFYTFYNAKGTSYLSNASESCNN
CHIMNEVYNEYMAGPHAQVKVGEARATCVDCHLPHGFLLAKWIAKAESGLNHAYAFTEK
LDELPTNLSATEKSRKMIQDNCVRCHADFAQTAINATTNPHADKSLKASCHQDVGHK
HGI"
gene 145600..147684
/gene="ppk"
/locus_tag="DMACINML_00411"
CDS 145600..147684
/gene="ppk"
/locus_tag="DMACINML_00411"
/EC_number="2.7.4.1"
/inference="ab initio prediction:Prodigal:2.6"
/inference="similar to AA sequence:RefSeq:CAL35471.1"
/codon_start=1
/transl_table=11
/product="polyphosphate kinase"

```

```

/protein_id="Prokka:DMACINML_00411"
/translation="MQTNPNMFLNRELSWLRFNRSRVLDDQCSRPLPLLERLKFVAIYCT
NLDEFYMRVAGLKQLFSAGVNISSDEMSPLQQLKAIRKYLHKEKDLEHYFNEIIS
DLEKENLFIKSYENLDNNLKQKCDEYFFSTIFPVIVPIAVDATHPFPHLNNLSFSLAV
KICDKTHPELIKFGMIRIPRVLPRFYEVSANVYVPIESIVEKHTEEIFPGYKLLASAA
FRVTRNADMVIEEEEADDFMMILEQGLKLRKGAFVRLQIQKGADEQIVEFLNTHMKI
FHKDVYEYSILLNLPWLQIAGNKTFTHLLSPLYAPKTLPPFDENLSIFDAIDKEDIL
IIQPFESFDPVYKFIKEASKDPEVISIRMTLYRVEKNSNIVQALIDAASDGIQVTVMV
ELKARFDEENLHWAKALENAGAHVIYGITGFKVHAKVSQVIRKKGDCLKFYMHLSTG
NYNASSAKIYTDVSYFTSKVEFARDTTSFFHILSGFSKNRRLQTLSPNQIKEKILE
MIALEASKGSEGVIIAKMNSLVSDIICALYGASIKGTQIDLIVRGICCLKPNEEFSK
NIRVRSIIGKYLEHARVYFKHSEPNYFISSADWMPRNLERRLELMTPIYDERSKAKL
AQFLRLQLSDNLLAYELQNDGEYTKVASNEKVIDSQQILEEYVSKIYKTLKKDADQSR
ATYLASKLKFEN"
gene      complement(147817..148704)
          /locus_tag="DMACINML_00412"
CDS      complement(147817..148704)
          /locus_tag="DMACINML_00412"
          /inference="ab initio prediction:Prodigal:2.6"
          /inference="similar to AA sequence:RefSeq:CDH62331.1"
          /codon_start=1
          /transl_table=11
          /product="FIG00470172: hypothetical protein"
          /protein_id="Prokka:DMACINML_00412"
          /translation="MALPSMGHTAPATENVKLLQSVYETIIKIGATETPILNKIGTSK
VTNPLTHSWLTDTFEEPKNANLELSQFVGETKNTAQKTTNATQIFITEVMVSKALLK
ANQYGGNEMEYQIGKKTKEHKMDMEYALFGLGRDNDVKKSVFKDYIQAQEATSGEMAG
IFHYVAKGNSRFADGKRGVLAFLDEAGDWSGTATELTEDKLNQILQNIWNAGVTPKDV
FLGADLKGAINKFATRILGNETKLVGQVVSLEDFGTVNFHMRLLSPKYGLGDVLIA
GDFQYMKHGLYIPTTFNRS"
gene      complement(148783..149442)
          /locus_tag="DMACINML_00413"
CDS      complement(148783..149442)
          /locus_tag="DMACINML_00413"
          /inference="ab initio prediction:Prodigal:2.6"
          /codon_start=1
          /transl_table=11
          /product="hypothetical protein"
          /protein_id="Prokka:DMACINML_00413"
          /translation="MQCFLIDELNITESEYDRFLDKHDRESSNNYNYGAIKIFSDNNT
IDGDKLQEYFFGTEKKYDVFISHFSQEKDKAIQLKKFLEEECKVNAFVDSYVWGNRYK
ILSYIKEELKADNEEYLLANLHIMLQSSLRNIIESARYFIFINSKEHCNNTIYSPWV
YYELQEANRHSNETNLNENLCEFDISIKRDVYSFLKKTIVDDMLYFKRHINKFF
I"
gene      149529..149996
          /locus_tag="DMACINML_00414"
CDS      149529..149996
          /locus_tag="DMACINML_00414"
          /inference="ab initio prediction:Prodigal:2.6"
          /codon_start=1
          /transl_table=11
          /product="hypothetical protein"
          /protein_id="Prokka:DMACINML_00414"
          /translation="MEKEKILIEELKMIQDIKRMADNSFKLKKWCLTVVVVTMLFQE

```



GVNNFIPFIISLFGFWFLDSYLYIEREFRNLYNTKARQFNANNANLKQSMQSHFIFEID  
 GKFTLKKLFIVGFSKILYFYGVILILILLVKYKKNVFNVDNLIISIGAINT"

gene complement(150195..150710)  
 /locus\_tag="DMACINML\_00415"

CDS complement(150195..150710)  
 /locus\_tag="DMACINML\_00415"  
 /inference="ab initio prediction:Prodigal:2.6"  
 /inference="similar to AA sequence:RefSeq:ABS44288.1"  
 /note="conserved hypothetical protein"  
 /codon\_start=1  
 /transl\_table=11  
 /product="hypothetical protein"  
 /protein\_id="Prokka:DMACINML\_00415"  
 /translation="MNLNLTVEYNLTRQMIINAKESTDKGIKKDIPSALRGKIEQELNI  
 QPLKEFGENYTEYYHDGKQALQKLLIEKQGVAGAFHRKDLGDIDLWGEVIDKVKHK  
 GYGLSHIIDEHPELDLNIPEIIEKGEIAQRKNREKSFNIVFKDYILGLNKGFNKNGE  
 NQWIVTAFEKK"

gene complement(151298..151656)  
 /gene="ssrA"

tmRNA complement(151298..151656)  
 /gene="ssrA"  
 /locus\_tag="DMACINML\_00416"  
 /product="transfer-messenger RNA, SsrA"  
 /inference="COORDINATES: profile:Aragorn:1.2"

gene complement(151657..152067)  
 /locus\_tag="DMACINML\_00417"

CDS complement(151657..152067)  
 /locus\_tag="DMACINML\_00417"  
 /inference="ab initio prediction:Prodigal:2.6"  
 /inference="similar to AA sequence:RefSeq:CAL35473.1"  
 /note="hypothetical protein Cj1361c"  
 /codon\_start=1  
 /transl\_table=11  
 /product="hypothetical protein"  
 /protein\_id="Prokka:DMACINML\_00417"  
 /translation="MGILTKLELDYEIDDIEKFLQFFRTMCDRFEPLIIQLGSDSVRY  
 KEAIKELETLAHTAWAARRLNLEEVTDFCVFCCEEMMAQANRFNGPASDEFTDWMLLM  
 SDQFEKYCRSYENDDSVLAVFNPLIVNVPNIISK"

gene 152158..153168  
 /gene="ruvB"

CDS 152158..153168  
 /gene="ruvB"  
 /locus\_tag="DMACINML\_00418"  
 /EC\_number="3.6.1.-"  
 /inference="ab initio prediction:Prodigal:2.6"  
 /inference="similar to AA sequence:RefSeq:CAL35474.1"  
 /codon\_start=1  
 /transl\_table=11  
 /product="holliday junction DNA helicase"  
 /protein\_id="Prokka:DMACINML\_00418"  
 /translation="MDRIVEIEKYSFDETYETSLRPSNFDGYIGQENIKKLNLFISA  
 AKKRNECLDHILFSGPAGLGKTTLANIISYEMGANIKTTAAPMIEKSGDLAAILTNLS

```

EGDVLFIIDEIHRLSPAIEEVLYPAMEDYRLDIIIGSGPAAQTIKIDLPKFTLIGATTR
AGMLSNPLRDRFGMQFRLEFYKDEELAIILQKAALKLNKTCENEAALEIAKRSRSTPR
IALRLLKRVRFADVND EETITKERAKEALNSLGVNELGFDAMDRLYLELLTEAKRKP
IGLSSIAAALSEDENTIEDVIEPYLLANGYIERTAKGRIASTKSFSVLKLNQEQLFD
EN"
gene      153178..154221
          /gene="amaA"
          /locus_tag="DMACINML_00419"
CDS      153178..154221
          /gene="amaA"
          /locus_tag="DMACINML_00419"
          /inference="ab initio prediction:Prodigal:2.6"
          /inference="similar to AA sequence:RefSeq:CAL35475.1"
          /codon_start=1
          /transl_table=11
          /product="acid membrane antigen A"
          /protein_id="Prokka:DMACINML_00419"
          /translation="MQTGKIFLICFTLVVLSLLLYLFKDFLLVIIIASLMVATSNAN
AKFLSLTNGRKFLASMLTTACMVLLFFAPFVYAMIELAKALKNFDINLVQTLYVKN
YQFTLPESLSFLEPKIKEFLASIDLNSISKQILNYASSFTKSGAKFLIDMVLCIFYF
FANLYGTELVIYIKSVIPIDKQELDDILSEVGNVMAVVLYSMIIIAILQGALFSIIAM
FYGYDAILMGVIFAVSSLIPALGGALVYIPIISLYEFASSGLGSALVIFIYSVVVISFI
ADTLVKPLIIKWINEKLVKPTKINELLIFLAMIAGISTFGFWGIILGPAILTFFIST
IRLYIILKDKNLI"
gene      complement(154268..155659)
          /gene="fumC"
          /locus_tag="DMACINML_00420"
CDS      complement(154268..155659)
          /gene="fumC"
          /locus_tag="DMACINML_00420"
          /EC_number="4.2.1.2"
          /inference="ab initio prediction:Prodigal:2.6"
          /inference="similar to AA sequence:RefSeq:CAL35476.1"
          /codon_start=1
          /transl_table=11
          /product="fumarate hydratase"
          /protein_id="Prokka:DMACINML_00420"
          /translation="MEYRIEHDTMGEIKVPNDKYWGAQTERSFENFKIGCEKMPKVL
YAFANLKKSLALVNNKLGKLD DAKKSAIVQACDEIIAGKFDDNFPLAIWQTGSGTQSN
MNMNEVIANRATEIMGGDFRKEKLVHPNDHVNMSQSSNDTFPTAMSIVAVEQVEKLI
PALDELIATFEKKVKEFEGIIKIGRTHLQDATPLTLAQEFSGYLSMLLHSKEQIITSL
PTLRELAIGGTAVGTGLNAHPELSEKVSEELSKLIGTKFVSSPNKFHALTSHDAINF
TGAMKGLAANLTKIANDIRWLASGPRCGLGELNIPENEPGSSIMPQKVNPTQCEAITM
VAVQVMGNDAAIGFAASQGNFELNVFKPVIIYNFLQSLDLLADSMHSFNIHCAVGIPE
NREKIEYNLHNSLMLVTALNPHIGYENAAKVAKNAHKKGISLKESAMELGLVSEEDFA
KFVDPKMIKPKA"
gene      complement(155794..157590)
          /gene="glmS"
          /locus_tag="DMACINML_00421"
CDS      complement(155794..157590)
          /gene="glmS"
          /locus_tag="DMACINML_00421"
          /EC_number="2.6.1.16"
          /inference="ab initio prediction:Prodigal:2.6"

```

```

/inference="similar to AA sequence:RefSeq:CAL35478.1"
/codon_start=1
/transl_table=11
/product="glucosamine--fructose-6-phosphate
aminotransferase (isomerizing)"
/protein_id="Prokka:DMACINML_00421"
/translation="MCGIVGYIGKNEKKHTILSGLKELEYRGYDSAGLAVMKNGELDF
FKAVGKLENLANKCANFTSEEFGFAIGHTRWATHGKPTEINAHPHLGQYSCVIHNGII
ENYKEIKNKLESQGVSFLSQTDTEVIVQLFEFYAEKMEVFEAWKKTIEELRGAFATLL
VSKKDPTRVFFAKNAAPLIVGKSKNREFYFASADTPLIGLCDEVIYLEDLSLGYASEN
ELVIYENNQLKQNSFTKLSGDKAYAKKDGFRFFMEKEIYEQSRVMSEVLMGRINGDEV
VFDELENENLSTVDEITLCACGTSYHAAMASAYL FERLAKVKAKVEIASEFRYREAIV
KPNSLFIVISQSGETADTLEALKIAKEQGAKTFAICNVDNSNIVRLAHL SLLTRAGIE
KGVASTKAFATQVLT LWMLAIFIAQKKKIDMSAEIKALLHTPNCVAVSTKLHEKIHRL
SKRYLDGHGFFFIGRDVFYPLALEGALKLKELSYLHAEGYPAGEMKHGPIALADSKLY
TIALMPKTLLEYKTKSNVEELIARDSTVLCVSPLDFDLSDDFIKTNEQDHYMCEFFEM
MVTITQLLAMEISIRLGNDVDMPRNLAKSVTVE"
gene complement(157594..159942)
/locus_tag="DMACINML_00422"
CDS complement(157594..159942)
/locus_tag="DMACINML_00422"
/inference="ab initio prediction:Prodigal:2.6"
/inference="similar to AA sequence:RefSeq:CAL35479.1"
/codon_start=1
/transl_table=11
/product="putative nucleotidyltransferase"
/protein_id="Prokka:DMACINML_00422"
/translation="MLNKELELFKKNLNTYAQNRYKFFLKQGSFSLYHSKNMDNFLKQ
TYDIVLKECFENFLPASDNIPFCVLASKGYAKNNLCANESISLIFVYKDIKAYHLKPM
IKAFIEILNDVHLQIDYVLELNGLYNASNELKTTIIGARFICGSKILFKSVKEKFD
ILRANKNEFAQILLANFKDFNLPFIKQEFNIKKDFGGLDHLRALESLLILFKNSPKNY
ALNFIDEKNLSELRLAADFLLSLKSAINLQSNKDQDEF LFSNIHEIAELMYRKGKKNL
DAEKILVQKALQSMHTIGFYTHFLAYKIQNELQNL TQKQYQFKNLAEALTFLLDLEDQ
DIVFDLDFV FALKNLSYGKKDLEKALALFEKIFFKRHSFCILKLLLD SGILKELCKPF
GMVRFSLDDEGDYSFDEQAFLLLKEFEKYEDELESKLNNADEKMILKLVILLSAINN
ENEISLASIYRAYCVKFNKNDIFELGLRIFKNHNALKELA EKEDVYNPIIICALLSK
VENLKTLELLHTLTWLKAKALNRNPFYKVIDRILENAKQGFDDENLLDETARRVKKE
LTLKRTKFLDQNAI LQDKITHIKSNLFIKNTFEDIVEIARFAKENDFKFWSNSTN
LSLQIVAFKDFKIEIVLTALANLNLVFMNLFELFDDKIYLRFEYDNIITDEQKIKLCE
LLNSNL SGFSSKIKKPIIKKDELKLDL NYSKIYAKLSLNTK DQOGLMAYMMNIFNEL
GLVLSAAKIQTIRQRTRNTFIFQKNDNLEKNEEKLLNSLISE"
gene 160085..161149
/locus_tag="DMACINML_00423"
CDS 160085..161149
/locus_tag="DMACINML_00423"
/inference="ab initio prediction:Prodigal:2.6"
/inference="similar to AA sequence:RefSeq:CAL35480.1"
/codon_start=1
/transl_table=11
/product="putative radical SAM domain protein"
/protein_id="Prokka:DMACINML_00423"
/translation="MKNLLEKLENEERLNENEANALWDLDFLTLAKFAHKKRTKLHGK
KVYFNINRHINPTNICADTCKFCFAFSAHRKNPNPYLMSHEEIMKIVDDTITRGTKEVH
IVSAHNKDTSWQWYLEIFKMIKEKYPQMHIKAMTAAEIDFLHRRFKMSYEEVIEKMLE

```

YGVDSMPGGGAEIFDEEIRKKICHGKVSSENWLKIHKLWHDKGRQSNATMLFGHIEER  
 HHRIDHMLRLRALQDESGGFNAFIPLVWQRDNSYIQTDKIMDSEEILKTIASRLVLD  
 NIKNIKAYWATMTLNLAMVAQEFGANLDGTIEKESIQSAGGAKSAKGTNLKTFIEMI  
 KTANLTPVERDSLYNELQTY"

gene 161160..162479  
 /locus\_tag="DMACINML\_00424"

CDS 161160..162479  
 /locus\_tag="DMACINML\_00424"  
 /inference="ab initio prediction:Prodigal:2.6"  
 /inference="similar to AA sequence:RefSeq:CAL35481.1"  
 /codon\_start=1  
 /transl\_table=11  
 /product="putative permease"  
 /protein\_id="Prokka:DMACINML\_00424"  
 /translation="MDFFKLKENGTVRTEVVAGLTTFLAMVYIIPVNSSIVGNTGMP  
 IEALITATALITIVATTFNAFFANTPVAMSVGMGLNAYFTFAVCLGQKIPWQSALGAV  
 FISSVIFLILSFTSFRLWVIRNIPKDLRLAICAGIGCFIAFLGLSQMGISSNKDTLV  
 SIGNFKNPHVLFGIFTLILIIFFWAIKLRGAFILGVLISSIIAWIFGIDNASFPEQIF  
 SLPNFSNENGLGAIFFLELDIKSALNIAMIPIILTFITQLFDSIGTITGIGERGKIFD  
 DAKNGEKKLGKTLMADATGSALGALGGTSTVTAFFVESTTGVESGGRTGFTALVVAICF  
 AFTLFLPLFKAI PANAIYPVLVMVGILMFMEVKNIDFKDSIAIVASFFTIIMPPFTY  
 SITTGFAGFGLSYLLVRIFKREWDKINLGIIVLSLISLGNFLLIALQ"

gene 162497..162940  
 /locus\_tag="DMACINML\_00425"

CDS 162497..162940  
 /locus\_tag="DMACINML\_00425"  
 /inference="ab initio prediction:Prodigal:2.6"  
 /inference="similar to AA sequence:RefSeq:CAL35482.1"  
 /codon\_start=1  
 /transl\_table=11  
 /product="putative nucleotide phosphoribosyltransferase"  
 /protein\_id="Prokka:DMACINML\_00425"  
 /translation="MIFYSYEEFKEDVKILAKEIKEDFNPDALLAIARGGMSLGHSLA  
 VALQTRNLFALNSIHYYDDTKKLDTIEIFNIPDLSKHKILLIDDIVDSGESLAEIKKV  
 LLEKFPHIELKIATIFYKKTALLEPDFKIKEAKEWVEFYWDIHID"

gene 162982..163680  
 /locus\_tag="DMACINML\_00426"

CDS 162982..163680  
 /locus\_tag="DMACINML\_00426"  
 /inference="ab initio prediction:Prodigal:2.6"  
 /inference="similar to AA sequence:RefSeq:ABS44654.1"  
 /codon\_start=1  
 /transl\_table=11  
 /product="lipoprotein, VacJ family"  
 /protein\_id="Prokka:DMACINML\_00426"  
 /translation="MRLKLISCILLFSTIFAFANELDLNDFEEYQSYKVNDPLSGYN  
 KAMTSFNVTLYDYGFRPILKGYNAITPEFIRTGVRNFFDNLFSPLRFVGNVLQFKFEE  
 AGEEFKRFSANTIMGFGGIMDPASKMGLKHPADLGTVLAHWGVGSGFHIVLPVLGPS  
 NLRDALTLPATWYASPTAYIDPTWASIAISAYGFGNELSFRLEIDEIYYNTPNLYPF  
 IRDAYEQRRNELSK"

sig\_peptide 162982..163041  
 /locus\_tag="DMACINML\_00426"  
 /inference="ab initio prediction:SignalP:4.1"  
 /note="predicted cleavage at residue 20"

gene 163690..164259  
/locus\_tag="DMACINML\_00427"

CDS 163690..164259  
/locus\_tag="DMACINML\_00427"  
/inference="ab initio prediction:Prodigal:2.6"  
/inference="similar to AA sequence:RefSeq:CAL35484.1"  
/codon\_start=1  
/transl\_table=11  
/product="putative periplasmic protein"  
/protein\_id="Prokka:DMACINML\_00427"  
/translation="MKKIFLILTLNIFALQLDEISGTMQKNINKSLQLLQNNKEDK  
KQAADGIFLIFDHIIDYKLMAQLSLSKDYSKLNPKQEKFASAFEASLKKSFDTKLN  
YKDQVLMVKNKNGELKNAKRYFLTSSMIVDGEKNIIFKFYNNNDWLIYDIDVLGVSIV  
QTYRSQFGDILANQDFDTLLQKLENITIE"

gene 164259..166721  
/locus\_tag="DMACINML\_00428"

CDS 164259..166721  
/locus\_tag="DMACINML\_00428"  
/inference="ab initio prediction:Prodigal:2.6"  
/inference="similar to AA sequence:RefSeq:CAL35485.1"  
/codon\_start=1  
/transl\_table=11  
/product="putative ntegral membrane protein"  
/protein\_id="Prokka:DMACINML\_00428"  
/translation="MFAKFLKIFIYHPKSTFFTTLFICLFLSFFASKLSVDASAESLL  
LEDDKDLKIFRELSKHYKSDNLLLAFKPEDENPFSNKNLNKELHQELEQVSLVER  
VFSIINAPLLQSENTDLKELLKNIPNIESKDINLTKAQNEILNSPFYKNNIISKDGK  
TTGLIYKPDITYNELIEKRDLDSTDDNEKEQIRLAIKKHQEQKQVITKQGLDTIKNI  
IKKYEKDEDRFYLGGVSMIADDMITYIKSDLMLYGISLVFLACALYCFFRSWRFVFL  
PLFICFISLSAASGVFALLNFQITVISSNYVALVLIITLSVVIHLITHFIEISKLYPK  
AKIQRLVLQTLKANPSFYAIITTMIGFFSLMLSNIPIIKLGIMMSIGIGLALIFS  
YFLASALVLLKPKKYYKKEFKFNFLAFCAKTSLDPKKRPPIIYILSIVTIIALVGIS  
KLRVENSFVNYFKDGSEIKKGLLVIDKILGGTLPDIIIRFPNNENNSLNDVDFSFE  
SEFDALATKDTYWFNSQKTRIAKKVHEFLENKEFIGSVLSLNSLLSLGKNINDGKDL  
DFTLAFLENLPLELKQELLSPFVNIENELRFSIRIIDSPPKLRNEFLTNLKQGLE  
TLLKNDGVEIQITGIMLLYNMLQSLFSSQFDTLIFVILVIFVLFIIIFRSLKFSIIA  
LLVNIIPLSMVFALMGILGIPLDMSITIAAIAIGIGVDDTIHYIYRFKEEIKTKSVE  
EAILASHLSIGSALYTTIGIVLGFVMMSSNFIPITTYFGVLTVMILLLSGSLFLL  
PSLLITIYTKKTKALNPYKVHK"

gene complement(166755..167363)  
/locus\_tag="DMACINML\_00429"

CDS complement(166755..167363)  
/locus\_tag="DMACINML\_00429"  
/inference="ab initio prediction:Prodigal:2.6"  
/inference="similar to AA sequence:RefSeq:CAL35486.1"  
/note="conserved hypothetical protein Cj1374c"  
/codon\_start=1  
/transl\_table=11  
/product="hypothetical protein"  
/protein\_id="Prokka:DMACINML\_00429"  
/translation="MKILLATSNKHKVIKELKELKEFEIYAFDEILTAFEIEENGNSF  
KENALIKARAVFKALSDKQKNDFIVLSDSGICVDVLGGKPGIYSARFSGKGGDKSNR  
DELVKQMGALGFKTSKAHYVAIALVSLGGEWTTGSMHGDVIDIERGENGFYDSL  
IPKGFDKTLAELSNNEKNQLSHRFKALELARIILKVLNKGKE"

gene complement(167335..167790)  
 /locus\_tag="DMACINML\_00430"  
 CDS complement(167335..167790)  
 /locus\_tag="DMACINML\_00430"  
 /inference="ab initio prediction:Prodigal:2.6"  
 /inference="similar to AA sequence:RefSeq:ADN90629.1"  
 /codon\_start=1  
 /transl\_table=11  
 /product="Integral membrane protein"  
 /protein\_id="Prokka:DMACINML\_00430"  
 /translation="MNRFQTFSLMTEGKVNSELLMDYKDKLETLSDEAMFYFCSLELK  
 NPIIGLILGVTPAFILSGLTFDRFYKGMGLGFVKMAMWAFIFIGLLIAGFFDSSSML  
 VWFIFNIIALFIWNILDFFLVWQGIKNDNLAKIIQFLEQDNENFISNKQ"

gene 167933..169228  
 /locus\_tag="DMACINML\_00431"  
 CDS 167933..169228  
 /locus\_tag="DMACINML\_00431"  
 /inference="ab initio prediction:Prodigal:2.6"  
 /inference="similar to AA sequence:RefSeq:AAW36002.1"  
 /codon\_start=1  
 /transl\_table=11  
 /product="multidrug resistance efflux transporter,  
 putative"  
 /protein\_id="Prokka:DMACINML\_00431"  
 /translation="MLNNVPLPSFIVGTRFFGLFIVLPVLSFYALELQGANEFVGLL  
 VGVYALTQMALQMPFGILSDKIGRKKTMLIGLIIFIIIGSLICSWTDNIYTMLVGRMLQ  
 GAGAIGAVATAMISDFITEENRGKAMAIMGSFIGLSFAASMVISPLMSAKWGLSSFLD  
 LSAALLLCIILLYTVVPKENKITHENTKTPFLHLIKQKNLALMNFTNFMQKMLMSIA  
 FLSIPIILVKHLGFDEHKLWIVYTASMIAGFIAMGFSGLGEKRGSLAKQILLGLIAFF  
 ILSYIFFVFSNSITFFIVAVVIFFIGFNLHEPIMQSCASKFCKVHEKGAALGLFNAFG  
 YGGSFIGGVIGGIFLHLNKLELLAILVALSIVWFIALLYLKNPSEFKNIYLPLETTL  
 NFSEFNKNLGVVDIYKNSKNLVIKFDSKLTNKEELESKI"

gene complement(169230..169757)  
 /locus\_tag="DMACINML\_00432"  
 CDS complement(169230..169757)  
 /locus\_tag="DMACINML\_00432"  
 /inference="ab initio prediction:Prodigal:2.6"  
 /inference="similar to AA sequence:RefSeq:EAQ72915.1"  
 /codon\_start=1  
 /transl\_table=11  
 /product="lipoprotein, putative"  
 /protein\_id="Prokka:DMACINML\_00432"  
 /translation="MRKIHLISALFLALFLSACAKSAFVQSSIQTSNEGIFLKAKQGQ  
 SFSITLQNPSKIQSALKDELALRLKNLGLKEVSLNADYEILINLVDFKKHSYAQRITS  
 SGRFFYDFDPFENSGEWYIENYYTMQVNIQISSKNTPQKTSLFARTAYLSDKKRCQLS  
 LENKIINQISSFFYF"

sig\_peptide complement(169695..169757)  
 /locus\_tag="DMACINML\_00432"  
 /inference="ab initio prediction:SignalP:4.1"  
 /note="predicted cleavage at residue 21"

gene complement(169757..170467)  
 /locus\_tag="DMACINML\_00433"  
 CDS complement(169757..170467)  
 /locus\_tag="DMACINML\_00433"

```

/inference="ab initio prediction:Prodigal:2.6"
/inference="similar to AA sequence:RefSeq:CAL35492.1"
/codon_start=1
/transl_table=11
/product="putative periplasmic protein"
/protein_id="Prokka:DMACINML_00433"
/translation="MKKISLILACSMFLFAASNSEISDFYKSIKAQFPNATVVSIGNR
QKVGNTGFESVIVTITILEGQKQEQILFTKDNLIVPDIIDLTKTQSYAQEYEMKKFQEA
RANFTKNVKPVVQEETMLIALGDKSKPAIYVFSDEPCPYCRDHQAQIKDELKQYQVNY
ILTPVHGKSAFEKSALIYKESKKAQSDDEKIAILNKYYDANIKSYPKVSDSELKEVFS
LYEKYRSLGLSATPTIIK"
sig_peptide complement(170417..170467)
/locus_tag="DMACINML_00433"
/inference="ab initio prediction:SignalP:4.1"
/note="predicted cleavage at residue 17"
gene complement(170516..172315)
/locus_tag="DMACINML_00434"
CDS complement(170516..172315)
/locus_tag="DMACINML_00434"
/inference="ab initio prediction:Prodigal:2.6"
/inference="similar to AA sequence:RefSeq:CAL35491.1"
/codon_start=1
/transl_table=11
/product="putative selenocysteine-specific elongation
factor"
/protein_id="Prokka:DMACINML_00434"
/translation="MNSLLIGTAGHIDHGKTSLIKAINGFEGDSLKEEKERQITINLS
FSNLNYKQKHLFSIDVPGHKDLVKTMISSGAFGFSACL FVVDINEGLKEQSIHLEVLE
LLGVKDIIILVLSKCDLCENPKEQEQKILNSLEFTPMKVFHTSIKDQESIERLKNYLLN
LECKNANENLVFRYYIDRVFSLKGIGTIVTGSLENGKISLNEKIICLDNQKELVVKNI
QNHESNFDEISAFNRVALSLNCDYKELKKGVLVSKKGFKGFKECDVLKAKRLKNEK
MLFCVGTKSIECKISILKELENNEFFAHLEFEKNLFLCFNEKFILLQNNRVVGGGEVL
NPVSEPLKKEQKNKFLMLLKNKELKKAFFLKNTHKYGFLLSSYQRFKLSHEEALNL
AKELSGVFIDEKNLNIYNLLALDELKFFISFILEKNPYAMLSATSLALRLPWASAFC
EFGLQNLNLLFEKGVYFKKGIDYEKLRERNDELYNILKKGQIKPQAPYNLYEFLE
LDRKSGDEILKCLKQNRVIRLSHNLFVEKNALDKLMQECLEILKSQSLDIQSMKERF
NLSRKYAIAYLEYLDKDERVQKKDEKRFLKTNI"
gene complement(172312..173634)
/locus_tag="DMACINML_00435"
CDS complement(172312..173634)
/locus_tag="DMACINML_00435"
/EC_number="2.9.1.1"
/inference="ab initio prediction:Prodigal:2.6"
/inference="similar to AA sequence:RefSeq:CAL35490.1"
/codon_start=1
/transl_table=11
/product="L-seryl-tRNA(SeC) selenium transferase"
/protein_id="Prokka:DMACINML_00435"
/translation="MNKFRTPQIGSLIDDESLEKEYPFYLRSHFCKSVVAKLKANITE
NSWDKNTILEKIQQEIQKHLKDLQSVINATGVVIHTNLGRSVIDESIFEKSKDVLNCN

```

YANIEFDLENGKRGSRVALVLEKLMKLFECEDALVNNNAAVFLVLHSLCFDKELIT  
SRGELVEIGGSFRVSEVIKAAGVKLCEVGTSNKTHLKDYEKAINENTKMLLKTHKSNF  
ALIGFHSEVGIKDLGNLAKEKGLLSYYDLGSGWCENLNPKLIKNEPKVKDVIKHCIDL  
SFGDKLFGSVQAGIILGKKEIDKIKENQLLRMLRVDKITLAFLNESLKAYLEKDYE  
KITSKLLNDEITYIKEKALRVQNEIQVKSELKMSKSLVGGGSMPPDKTLETCILAFDG  
NALKLQEKFREKNIIGRIENEFVLDVRTIREKDLSKLIQIINTMENL"

gene 173704..175365  
/locus\_tag="DMACINML\_00436"

CDS 173704..175365  
/locus\_tag="DMACINML\_00436"  
/inference="ab initio prediction:Prodigal:2.6"  
/inference="similar to AA sequence:RefSeq:AAW36003.1"  
/codon\_start=1  
/transl\_table=11  
/product="iron-sulfur cluster-binding domain protein"  
/protein\_id="Prokka:DMACINML\_00436"  
/translation="MKDFVFIQENLIPLPDEINIWGKCKDEEVLISNEKAQKAQIYA  
PEINFYLNKSQDEILERSKNILKLYEARANVYDLGLDLEQNKEVKNRILVDSDDAMA  
DFFKKQNFKIISLKNEEILAVFGSIGELCAVILNQGEVEIDFDILLFNTNSNEIRKD  
FTRQSGCYNISNFKDQESLLEFLQDKSPKYTYKTYITYDSSVCQYHERRSEHCAKCAE  
ICPTVAILKDESKHLEFSQVDCLGCGGCISVCPGSLDYAMPRESFFELCFEYKEK  
KILIIPKMSLENLNILPKDVLPMIEGKWLSSMHFLTLQSSGANLVFYTDFISR  
GSAEIDLNTFFERKFQKEAIFTAKDEKELQNALEKQEFIENLSFDFHNNTLTTREN  
FAKRMQNLIQNDDFGVKESGEWLRYGKIEINANTCTLCLSCVACNVGALADTKENA  
LKFNASLCTTCGYCEVSCAEKDTLKLTRSGMEFNPSYFEYQTMAKDELFCIECGKEF  
ATKKAVEKIANLMKPKFGNDESKIKTLYCCADCKAKVMILAMQKR"

gene complement(175528..176019)  
/gene="fldA"

CDS complement(175528..176019)  
/gene="fldA"  
/locus\_tag="DMACINML\_00437"  
/inference="ab initio prediction:Prodigal:2.6"  
/inference="similar to AA sequence:RefSeq:CAL35494.1"  
/codon\_start=1  
/transl\_table=11  
/product="flavodoxin"  
/protein\_id="Prokka:DMACINML\_00437"  
/translation="MSVAVIYGSAMGNTEGAANTIASKLGISDVLNVADIDAAKINSY  
DKLICGTSTWGSGLQDDWDGDFDGLSLGGKTVAVFGMGDSESYSDTFCGGMGKLAE  
NLKNAGANLVGEVSTDGYTFESSDAVVDGKFVGLALDNDNQEDQTEARIDAWVEQIKA  
HFA"

gene complement(176019..176714)  
/locus\_tag="DMACINML\_00438"

CDS complement(176019..176714)  
/locus\_tag="DMACINML\_00438"  
/inference="ab initio prediction:Prodigal:2.6"  
/inference="similar to AA sequence:RefSeq:CAL35495.1"  
/note="hypothetical protein Cj1383c"  
/codon\_start=1  
/transl\_table=11  
/product="hypothetical protein"  
/protein\_id="Prokka:DMACINML\_00438"  
/translation="MLFGFEDKREFIPKVYSSLCKQELVKTFLIQYNASVDSVLRIP



SYARSAKNLKKPFQNFQLQDAIHMPFGKIKNIDKNLTLNISYFQKRKGLIFKTKIFQNV  
 DILRLLRAYFRGICFDSQVLDFYVYDKISHQNQRSIVQNDNLIIDNKIAVLPLCK  
 EVDLQNLNIDSEIQKISKFIYQNFQEQICIVCPRNKNFTHFVQIKHFLCDLNKTMLKL  
 VPYSITNKLIRRK"

gene complement(176714..177031)  
 /locus\_tag="DMACINML\_00439"

CDS complement(176714..177031)  
 /locus\_tag="DMACINML\_00439"  
 /inference="ab initio prediction:Prodigal:2.6"  
 /inference="similar to AA sequence:RefSeq:CAL35496.1"  
 /note="hypothetical protein Cj1384c"  
 /codon\_start=1  
 /transl\_table=11  
 /product="hypothetical protein"  
 /protein\_id="Prokka:DMACINML\_00439"  
 /translation="MSVLVIGADEITPIKAVLYDLGAKKIEHWDARNENRVNRKPIPC  
 DTECIVMLTSFLNHNTMKKIKNEAKKRKIPLVCAKRSVSCVYCEYCKIFNLDKEFSCS  
 KAE"

gene 177222..178646  
 /gene="katA"

CDS 177222..178646  
 /gene="katA"  
 /locus\_tag="DMACINML\_00440"  
 /EC\_number="1.11.1.6"  
 /inference="ab initio prediction:Prodigal:2.6"  
 /inference="similar to AA sequence:RefSeq:CAL35497.1"  
 /codon\_start=1  
 /transl\_table=11  
 /product="catalase"  
 /protein\_id="Prokka:DMACINML\_00440"  
 /translation="MKKL TNDFGNIIADNQNSLSAGAKGPLL MQDYLLLEKLAHQNRE  
 RIPERTVHAKGSAAYGEIKITADLSAYTKAKIFQKGEVTPLFLRFSTVAGEAGAADAE  
 RDVRGFAIKFYTKEGNWDLVGNNTPTFFIRDAYKFPDFIHTQKRDPRTLRSNNAAWD  
 FWSLCPESLHQVTILMSDRGIPASYRHMHGFGSHTYSFINDKNERFWVKFHKTLQGI  
 KNLSNKEAAELIAKDRESHQRDL YNAIENKDFPKWKVQVQILA EKDADKLGFPFDLT  
 KIWPHSIVPLMDIGEMILNQNPQNYFNEVEQA AFSPSNIVPGIGFSPDKMLQARIFSY  
 PDAQRYRIGTNYHLLPVNRARSEVNTYNVAGAMNFD SYKNGAAYYEPNSYEE SPKEDK  
 SYLEPDLVLEGNAQRYAPLDNDFYTQPRALFNIMNQNKQEQLFENIAASMEGVEEKII  
 ARALGHFEKISPDYAQGIKKALGK"

gene 178704..179171  
 /locus\_tag="DMACINML\_00441"

CDS 178704..179171  
 /locus\_tag="DMACINML\_00441"  
 /inference="ab initio prediction:Prodigal:2.6"  
 /inference="similar to AA sequence:RefSeq:CAL35498.1"  
 /codon\_start=1  
 /transl\_table=11  
 /product="ankyrin-repeat containing protein"  
 /protein\_id="Prokka:DMACINML\_00441"  
 /translation="MITLSLEEEKRFAELCKMAFN FARNNEYENLKIMIEAGLNVNLK  
 THKGD TLLMLAAYNNSYECAMLLLEK GALVDEKNDRGQTPLAGVCFKGYLPMCELLVK  
 HGANIDENGLGMPYSFAIMFGRKDVAEFL LKSSKKSLSKRLSLGILKLFKK"

gene complement(179175..179843)

CDS /locus\_tag="DMACINML\_00442"  
 complement(179175..179843)  
 /locus\_tag="DMACINML\_00442"  
 /inference="ab initio prediction:Prodigal:2.6"  
 /inference="similar to AA sequence:RefSeq:CAL35499.1"  
 /codon\_start=1  
 /transl\_table=11  
 /product="helix-turn-helix containing protein"  
 /protein\_id="Prokka:DMACINML\_00442"  
 /translation="MDEKQIEQFVKLTNFLGQVLGKQYEVVHVLSKEGAYIAAIANS  
 HVSGRTLESPLSAFASSELVQNKAYLKEDFLCDYKALIGKSKLVRGSTFFIKNSDELVG  
 ILCINHDTSMRDLVCKIIDIEKLLDDMGEFLNQNKENNTSVDSLGNIIETLSHSIEEIL  
 AQSIDMNYLNSDYQLSIAQKEEITKTLYQKGFNIKGSVPIVARLLKISEPSVYRYLK  
 NFKS"

gene 180017..180379  
 CDS /locus\_tag="DMACINML\_00443"  
 180017..180379  
 /locus\_tag="DMACINML\_00443"  
 /inference="ab initio prediction:Prodigal:2.6"  
 /inference="similar to AA sequence:RefSeq:CAL35500.1"  
 /codon\_start=1  
 /transl\_table=11  
 /product="putative endoribonuclease L-PSP"  
 /protein\_id="Prokka:DMACINML\_00443"  
 /translation="MSNYPKAIGPYSAYREANGFLFISGQIPINPASGEIESSDIKEQ  
 TKQSLKNIGAIIEENGISYDQVIKTTCLLADISDFAAFNEVYAQFFKSPYPARSAFAV  
 KDIPKGAKVEIEVIAKKG"

gene 180383..181909  
 CDS /locus\_tag="DMACINML\_00444"  
 180383..181909  
 /locus\_tag="DMACINML\_00444"  
 /inference="ab initio prediction:Prodigal:2.6"  
 /inference="similar to AA sequence:RefSeq:EAQ72574.1"  
 /codon\_start=1  
 /transl\_table=11  
 /product="cryptic C4-dicarboxylate transporter DcuD,  
 authentic frameshift"  
 /protein\_id="Prokka:DMACINML\_00444"  
 /translation="MLGLAFSLFSVFLLVFMLYKKINAHMALLSGLLLSITSLANF  
 LIHTFPENYVLLNYPNIYAFNLALDFYQLKHAILEKDSLNLGFFDIFQVFNQTMNTL  
 AGLGLTLMAIAGFSAYMDHVGASYALFKVFEKPLKMKVSPYILLVAYFIVQFLVLF I  
 PSHAGLGLLLMVTMYPILVRSVSKLSALSVIGICQYIDHGPVSGNVIMASEKAEIDP  
 AIYFVHYQLPTTLPIIVAVGIAIYFCNKFFDKKDNFVFNQAQVEKELSENKDKENELK  
 KPPKIYAILPVIPLVLILGFSSVLDLILVLMGISNEEEVKAASSAIKMNPVAMVIS  
 TFVAIAFEMIRYKSVETLNSIMIFFKGMGHLFVITVSLIVCGQVFASGLLSVGFVDT  
 LIDFCKNAGFGVLAIIIVSILLAVCAFLMGSGNAFFSFAPLIPDIAKRFGIETITM  
 IAPIQIMTGFGRCSVPIAPAILAISAIKVSFVAVKRTAIPMLVAAIVNIIMTYIYL  
 "

gene 181921..183084  
 /gene="metC"  
 CDS /locus\_tag="DMACINML\_00445"  
 181921..183084  
 /gene="metC"  
 /locus\_tag="DMACINML\_00445"

```

/EC_number="4.4.1.8"
/inference="ab initio prediction:Prodigal:2.6"
/inference="similar to AA sequence:RefSeq:AAW36015.1"
/codon_start=1
/transl_table=11
/product="cystathionine beta-lyase"
/protein_id="Prokka:DMACINML_00445"
/translation="MNSKTKLIHCGRGDQNVSVNPTLMRASTILFKDHATWQKYR
ELRKTRVLSYGARGTTTNFELEKLICTLEGGYRAQLFPTGLAALAMVLLNYASKDAH
FLITDAIYGPVRTICELFLEKMGVEIDFLKADASDVEEKIKPNTKLILCESPGSILYE
IIDLPKLCKIAHSHNIPVAIDNTYSSGYFLNPLELGVDISVIAATKYLSGHSVDVTMGV
VVINEKEWKNFDKLPEALGFTTSPDDAYLVLGRMRTLDMRKAHEKSADEIVEFLQTR
KEIKTIFYPKPKLTHPNHEIFMRDHKGANGMVTIEFAEGYSKEDAIFVDELEYFSIGA
SWGGYESLATVTTTPRTATDWSKRGPFVRFHIGLEDTKDLIADLTAKAFDSIKK"
gene 183094..184461
/locus_tag="DMACINML_00446"
CDS 183094..184461
/locus_tag="DMACINML_00446"
/inference="ab initio prediction:Prodigal:2.6"
/inference="similar to AA sequence:RefSeq:CAL35504.1"
/codon_start=1
/transl_table=11
/product="putative fumarate lyase"
/protein_id="Prokka:DMACINML_00446"
/translation="MTGISVFDHKL LADSWS TQDMRAVFCEENRIQKWL DVEAALAKA
QAKLNIIPQEADEIAKKAYYKFMDMDFIFNEFKKTKHPLVPTVRGLEKACDNNLGEY
VHFGVTTQDIIDTGLVLQFKEAMTLVKSELKAIKALAKLAKTHKNTAMMGRTLALQA
LPITFGHKVAIWLSELD RHFERILELEKRLYVGSIVGAVGTKASLSDECNEVEKLTLE
NLGLEVPNISWQPARDRFIELGFVLGNINATFNKIAHQLLILSHNEIDEVAEPFGKGQ
VGSSTMPHKRNPVSEN AVTVSNAFKANLAILSDIERHEHERDQVWKMEWKLLPEMF
LMLSVLANMKFALS DLEVKKDKMLKNLDTLKGFLAERVMFALS DHYGKQHAHEIVY
ENAMLGIEQQKTFKEVLLADTRVSQVLKEKDINALLDATSYVGYAPKLVDEFLEKIQN
HAILQ"
gene 184470..185810
/locus_tag="DMACINML_00447"
CDS 184470..185810
/locus_tag="DMACINML_00447"
/inference="ab initio prediction:Prodigal:2.6"
/inference="similar to AA sequence:RefSeq:AAW36017.1"
/codon_start=1
/transl_table=11
/product="MmgE/PrpD family protein"
/protein_id="Prokka:DMACINML_00447"
/translation="MLYSEILADFIFNLQYENIPDAVVQRAKELMLDSLGTAI AASKE
ECVLNAFKAFENLST EKNTPVWVNDKLDPIYAAMLNGIASHALDFDDTHTTEAILHAS
AILTPLCLNYGFHISKNAKKI IKAFIGWEVAARVGIASKGTFHKRGFHTT AIAGIFG
SASASAVLLDLNKQQIINALGLAGSFASGINEFLSNGSNSKVLHIANAIKNGILVANF
AKNNMSGPLSIFEGRDNI FKCFIGIEQECDKTELDKGLGEI WQSMQVSIKPYPSCHFAH
GLIDCAIALKNDGLKADEIKSIRCFVDEVPISFICDPLEAKYTPNSAYEAKFSMPFLM
ALGFFDGKITLKS YQNLKRKEVLEFAQKITYEKRSQGF PKYFPGHMEAILQDGKVIC
KDFVINKGNFDNPLSFEELKDKFINNAKENLTMDKIHDILEQIKHLEKQTDLSL"
gene complement(185980..186144)
/locus_tag="DMACINML_00448"
CDS complement(185980..186144)

```

```

/locus_tag="DMACINML_00448"
/inference="ab initio prediction:Prodigal:2.6"
/inference="similar to AA sequence:RefSeq:ALW35763.1"
/codon_start=1
/transl_table=11
/product="mobilization protein"
/protein_id="Prokka:DMACINML_00448"
/translation="MPKIATAHCNPKKQPALNHNDRTNDNAKTITKELTHLNEYSCTS
DEVRKNLKII"
gene complement(186110..186382)
/locus_tag="DMACINML_00449"
CDS complement(186110..186382)
/locus_tag="DMACINML_00449"
/inference="ab initio prediction:Prodigal:2.6"
/codon_start=1
/transl_table=11
/product="hypothetical protein"
/protein_id="Prokka:DMACINML_00449"
/translation="MQKQYPEVYSLEESLAILKKYKDDVSKKDYEEIKSTICGHAIED
MFANEEDIIMLVKMSAYNLSSEIIEAIEYKEKGFVEYAKNCHRSLQS"
gene complement(186559..187149)
/locus_tag="DMACINML_00450"
CDS complement(186559..187149)
/locus_tag="DMACINML_00450"
/inference="ab initio prediction:Prodigal:2.6"
/inference="similar to AA sequence:RefSeq:APB40452.1"
/codon_start=1
/transl_table=11
/product="replication initiation protein"
/protein_id="Prokka:DMACINML_00450"
/translation="MSLNGKYTKTLYRLKQFRTTGKARFEWEDFCRIMDIPQDYRQS
EIDKWILKPAIKELSKERDLFDQIRVPFKNLAYEKEKAKGRGRGGKVSIGITFTFKPEN
IQMQKLENESQKIMSDEQKYLKILNNMKNLQVRFVYNDKLLWQFNDFDNFNKIIAVAL
IRDEYENLNFNGHMHFNKNQEQFFKMIDTFRNGIR"
gene 187802..187894
/locus_tag="DMACINML_00451"
CDS 187802..187894
/locus_tag="DMACINML_00451"
/inference="ab initio prediction:Prodigal:2.6"
/codon_start=1
/transl_table=11
/product="hypothetical protein"
/protein_id="Prokka:DMACINML_00451"
/translation="MKKIILGLAVIASLSSLALAKITVSQQPIV"
gene 188003..188209
/locus_tag="DMACINML_00452"
CDS 188003..188209
/locus_tag="DMACINML_00452"
/inference="ab initio prediction:Prodigal:2.6"
/inference="similar to AA sequence:RefSeq:ASI88145.1"
/codon_start=1
/transl_table=11
/product="Hypothetical protein"
/protein_id="Prokka:DMACINML_00452"

```

```

/translation="MILVTPCGVIDTTNFGKSEVNRQTIDFSLKFQEKKKEKVEAEAKK
EEQSNSTNTDKADNKKDQLLDISV"
gene      complement(188587..188859)
CDS       /locus_tag="DMACINML_00453"
          complement(188587..188859)
          /locus_tag="DMACINML_00453"
          /inference="ab initio prediction:Prodigal:2.6"
          /codon_start=1
          /transl_table=11
          /product="hypothetical protein"
          /protein_id="Prokka:DMACINML_00453"
          /translation="MQKQYPEVHSLEESLAILKKYKDDVNKEDYEGIKSVISNHAIES
IYMNELDIIAMIKQSALKLSADEIIAEYKEKGFVEYAKNCHRSLQS"
gene      complement(189007..189129)
CDS       /locus_tag="DMACINML_00454"
          complement(189007..189129)
          /locus_tag="DMACINML_00454"
          /inference="ab initio prediction:Prodigal:2.6"
          /inference="similar to AA sequence:RefSeq:ASI88145.1"
          /codon_start=1
          /transl_table=11
          /product="Hypothetical protein"
          /protein_id="Prokka:DMACINML_00454"
          /translation="MILVTPCGVMDIVNFAKSKINKQIFRYICLILKICYNVIF"
gene      189394..189618
CDS       /locus_tag="DMACINML_00455"
          189394..189618
          /locus_tag="DMACINML_00455"
          /inference="ab initio prediction:Prodigal:2.6"
          /inference="similar to AA sequence:RefSeq:CAL35506.1"
          /codon_start=1
          /transl_table=11
          /product="putative ferrous iron transport protein"
          /protein_id="Prokka:DMACINML_00455"
          /translation="MTLNELKDGQSAIIEIKAYKELHSRLLSFGFMKNKTLKKVHSS
LKNATIMVEFESTCVILRSNEAETIQVEPL"
gene      189615..191456
CDS       /locus_tag="DMACINML_00456"
          189615..191456
          /locus_tag="DMACINML_00456"
          /inference="ab initio prediction:Prodigal:2.6"
          /inference="similar to AA sequence:RefSeq:ALW62441.1"
          /codon_start=1
          /transl_table=11
          /product="iron transporter FeoB"
          /protein_id="Prokka:DMACINML_00456"
          /translation="MKKITIALAGQPNVGKSLINTLCKANMKVGNFSGVTVEKAVAK
TRYKGYELEFIDLPGTYSLDGYSEEEKIARHFLESKNYDIIIVNVLDATNLERNLILSA
ELLSLNKKMLLALNMCDEAKKEGIELDTSILSKEFQINVVEISAKTKQNLLELLLEKII
ILFENKFTPksRFSTPLCEKSLEKEDILTLVNELSRKVITYKKEERNLTKKIDALLIH
KFFGLPIFLFMWLLFQLTFTLGQIPMDYIESGFNALGEVWKNNIHNTFIASALADGA
IAGVGAVVFLPNIIILFLGIALLETTGYMSRVAFLLDGILHKFGLHGKSFIPPLITGF
GCSVPAFMATRLLKNKRDRLLTLFVINFMSCGARLPVYVLFIGAFFPSEEAGNYLFGI
YLLGAILGLIAAKILRTTAFRGIDEPFVMEPMKYRMPNWHLVWFMVFNKAKMYLKKAG

```

TFILVASLLIWFASNFPNNESNLDDFSAQERAVEQSYLGQFGKTIIEPIFSPLELDWKL  
 SVSLVSGLAAKEVMISTMGVLYSLGKEVDETSSDLKGIIAKNIPLPSAVAYILFVMIY  
 NPCFAATIVFSKESGKIKYFFLFLFTFCISAYIVAFI GLNITKFVIN"  
 gene complement(191453..192955)  
 /gene="hydA2"  
 /locus\_tag="DMACINML\_00457"  
 CDS complement(191453..192955)  
 /gene="hydA2"  
 /locus\_tag="DMACINML\_00457"  
 /inference="ab initio prediction:Prodigal:2.6"  
 /inference="similar to AA sequence:RefSeq:CAL35508.1"  
 /codon\_start=1  
 /transl\_table=11  
 /product="putative Ni/Fe-hydrogenase small subunit"  
 /protein\_id="Prokka:DMACINML\_00457"  
 /translation="MAKLSNEELKDILIKRIEKIENS DLV DKK TINEESVKALAKHLS  
 LGNEIPALAQKFFELAPKTKVWLHLCECTGCSESLLRADLPSFDELVDFDFSLEYHE  
 TLMAANGTKAEELLEHV LKEDFVLAVEGGVAAIDTFFLTIGAEGESGYEILEKLAARA  
 KAIFAVGTCSSYGGIQAAYPNPSKTCGISEVLTQKVVNIPGCPPSDVNIIVTLTYFAL  
 FGILPELDEQNRPVWAYGKCLHDL CERKAKFESGIFA EHF DDEKAKSGACLFKIGCKG  
 PYTYNNCPKVKFNAKTSWPVAAGHGCIACSEKNFWDEF GNYEKPMANPFSYAKLINQE  
 FSTEFAL EEQIQLSLMDFEFESNLKLILQNI AKNKL GALLVENYKTSFEKNFIFIEQ  
 NFDENPMPSSDIWKYFEINFILAKGEFLQDKNDFL KAAQNY SFKHASPYDFKLT LNEQ  
 KSKLDVSKSFRMPLIYL CGGLDFEALAYSVLKAF EKNIKSVIDFNKQKAG"  
 gene complement(192958..193782)  
 /gene="fabI"  
 /locus\_tag="DMACINML\_00458"  
 CDS complement(192958..193782)  
 /gene="fabI"  
 /locus\_tag="DMACINML\_00458"  
 /EC\_number="1.3.1.9"  
 /inference="ab initio prediction:Prodigal:2.6"  
 /inference="similar to AA sequence:RefSeq:CAL35509.1"  
 /codon\_start=1  
 /transl\_table=11  
 /product="enoyl-[acyl-carrier-protein] reductase [NADH]"  
 /protein\_id="Prokka:DMACINML\_00458"  
 /translation="MIMKGKKGLIVGVANNKSIAYGIAKSCYEQ GASLAFTFLNDALK  
 KRVEPIAE EFGSNFVYELDVNNNEHLDSIAEKIKDLGEIDFIVHAVAYAPKEALENS  
 FLETSKEAFDIAMGTSVYSLLSL TRAVLPVLKENGAIL TSYLGGVKYVPHYNVMGVA  
 KAALESSVRYLARDLG IKGIRVNAISAGPIKTLAASGIGDFRMILKYNEINAPLKRNV  
 SIEDVGN SAMYLLS DLARGVTGEVHYVDAGYNIMMGDVTKDENGNTVLCWDNQKG"  
 gene complement(193786..194457)  
 /gene="tpiA"  
 /locus\_tag="DMACINML\_00459"  
 CDS complement(193786..194457)  
 /gene="tpiA"  
 /locus\_tag="DMACINML\_00459"  
 /EC\_number="5.3.1.1"  
 /inference="ab initio prediction:Prodigal:2.6"  
 /inference="similar to AA sequence:RefSeq:CAL35510.1"  
 /codon\_start=1  
 /transl\_table=11  
 /product="putative triosephosphate isomerase"

```

/protein_id="Prokka:DMACINML_00459"
/translation="MIFAANLKC�HTRSSFKLYANILNQYLEAKNDDIIVFPPSIAFL
ENELNFIQGAQNFYPCINGAFTGELGKEHLDEFGIKCVLIGHSERRALGDENLIKAKF
NFAKEHAYKIIFCIGEDLELKNSNQTLDLFLKKQLEVIDLDYKNLIIAYEPIYSIGSGV
SAKKEDIKVLFLSSLTQAPLLYGGSVNEDNIKDILNIKHCSGVLIGSAALKAENFI
KLIKG"
gene complement(194454..195656)
/ gene="pgk"
CDS /locus_tag="DMACINML_00460"
complement(194454..195656)
/ gene="pgk"
/locus_tag="DMACINML_00460"
/EC_number="2.7.2.3"
/inference="ab initio prediction:Prodigal:2.6"
/inference="similar to AA sequence:RefSeq:CAL35511.1"
/codon_start=1
/transl_table=11
/product="phosphoglycerate kinase"
/protein_id="Prokka:DMACINML_00460"
/translation="MSDIISIKDIDLSKKKVFIRCDFNVPQDDFLNITDDRRIRSAIP
TIRYCLDNGCSVILASHLGRPKEISSKYSLEPVAKRLARLLDKEVIMAKDVIGEDAKS
KAANLKASEILMLENLRFEKGETKNDENLAKELASMAEVYINDAFGVCHRAHASVEAI
TKFFDENHKGAGFLLQKEIEFAENLIKRPARPFVAVVGGSKVSGKLQALTNLLPKVDK
LIIGGGMAFTFLKAQGFDIGNSLLEELLEEANKILTKGKNLGVKIYLPVDVVAAPAC
SQESPMKFVPSQEIPSGWMLDIGPASVRLFKEVISDAQTIWNGPMGVFEIDKFSKG
SIKMSHAISDGHATTVVGGGDTADVVARAGDADEMTFISTGGGASLELIEGKELPGVK
VLRSGGAQ"
gene complement(195659..196657)
/ gene="gapA"
CDS /locus_tag="DMACINML_00461"
complement(195659..196657)
/ gene="gapA"
/locus_tag="DMACINML_00461"
/inference="ab initio prediction:Prodigal:2.6"
/inference="similar to AA sequence:RefSeq:CAL35512.1"
/codon_start=1
/transl_table=11
/product="glyceraldehyde 3-phosphate dehydrogenase"
/protein_id="Prokka:DMACINML_00461"
/translation="MAVKVAINGFGRIGRCVARIISKRDDIELVAINDTTDIELTKYL
FKYDTVHGEFEGSVENEGDDLIINGKKIKVFKSRDIKELDFAKYGAQIVLECTGAHLT
IEKCQGF LDMGVQKVIMSAPAKDNTPTYVLGVNSQNYKGENIISNASCTTNCLGPVCR
VLQDNFGIEKGLMTTIIHAYTNGQSIIDAKTKDKRRSRAAAQNIIPTSTGAAKAMKLV
PELNGKLGQSMRVPVIDVSSVDLTAQLSKKVSKEELNEAFRKAATNLKGILMVDDD
ERVSSDFITCSYGAVVSDLTQVIADDFVKVVAWYDNEWGYSSRLVDMAVYIANKA"
gene 196719..197264
/ gene="nadD"
CDS /locus_tag="DMACINML_00462"
196719..197264
/ gene="nadD"
/locus_tag="DMACINML_00462"
/EC_number="2.7.7.18"
/inference="ab initio prediction:Prodigal:2.6"
/inference="similar to AA sequence:RefSeq:CAL35513.1"

```

```

/codon_start=1
/transl_table=11
/product="putative nicotinate-nucleotide
adenylyltransferase"
/protein_id="Prokka:DMACINML_00462"
/translation="MKIALFGGSFDPHPKHGDAIVKEALAKLDIDKLIIMPTFINPFK
KGFFADEKQRFWVWKLWGKLEKVEICDFETKQKRPVPSIESVEYLYKIYHPSKFYLL
IGADHLEKLHLWHDFKLNLSLVEFIIANRNDIEIPKNFKDLKTDIKIASSFIRSLDT
HEVCDEIKDEVKNYYEKLQKN"
gene 197293..197619
      /locus_tag="DMACINML_00463"
CDS 197293..197619
     /locus_tag="DMACINML_00463"
     /inference="ab initio prediction:Prodigal:2.6"
     /inference="similar to AA sequence:RefSeq:CAL35514.1"
     /note="conserved hypothetical protein Cj1405"
     /codon_start=1
     /transl_table=11
     /product="hypothetical protein"
     /protein_id="Prokka:DMACINML_00463"
     /translation="MQERVDLIVKILDEKKAEDIKTFDMSEQDYFVKYVIAATLGEK
HALSLIDELKTKLKAKGEEFLNIESSEWSVIDLGDILIHLLTPEHRGIYNIEELLES
LKKIKV"
gene complement(198257..199621)
      /locus_tag="DMACINML_00464"
CDS complement(198257..199621)
     /locus_tag="DMACINML_00464"
     /EC_number="5.4.2.-"
     /inference="ab initio prediction:Prodigal:2.6"
     /inference="similar to AA sequence:RefSeq:CAL35516.1"
     /codon_start=1
     /transl_table=11
     /product="putative phospho-sugar mutase"
     /protein_id="Prokka:DMACINML_00464"
     /translation="MLDVIFREYDIRGLYGKELNEKSVKAIGFCLGQTMLAKGCKNVS
VGYDARYSADELYKYLVSGLNKAGIQVYNIQGLVPTPLGYFSLYEGMKFDANIMITGSH
NPKDYNGFKITIGKESFFGAELKEFSKEVYKHLDDIEENLEAQKYDILSLVNFMCCE
QFSFLKDFNYKFAIDCSNGAAGVIEPLVKALNLKAHVMFSNPDGQFPNHEPDPTTEK
NLHAIKKFLNENQEYLLAFAFDGDADRMVALSKTHIFCGDEL CYLFAKNIPNPRILGE
VKCSKNLFDEVAKFGTIFMGKTGHSNIKKMMKEKDIDLAAEVSGHIFFKHRYFGYDDG
IYAFLRALELVYKGFDELSMISALPKLYTTPPEIKIPVSEEEKFKLVDEFKKAIERGAL
EGVKSLEIDGARIDFGYGWALLRASNTSPYLITRFEASSLEQAKELETQVFKLFNDI
KESV"
gene 199734..200270
      /gene="fliL_1"
      /locus_tag="DMACINML_00465"
CDS 199734..200270
     /gene="fliL_1"
     /locus_tag="DMACINML_00465"
     /inference="ab initio prediction:Prodigal:2.6"
     /inference="similar to AA sequence:RefSeq:CAL35517.1"
     /codon_start=1
     /transl_table=11
     /product="putative flagellar protein"

```



```

/protein_id="Prokka:DMACINML_00465"
/translation="MDEELENNEEKKKKGGSLVIIIVILLFVLLLSIMGVIAWLISSS
SSDESEVKAAPKEEVKVDKAKVTAPTQRGSDFANIGPMYPLDPFTLNLLSDSGSRYVK
CTIELEQNTPELLKPELDKKVAVIRDIIHALTAKTFEEVSTQKGKERLKDELVGKINE
ILTDGFIKNVYFTDFVVS"
gene 200270..200617
      /gene="acpS"
CDS   /locus_tag="DMACINML_00466"
      200270..200617
      /gene="acpS"
      /locus_tag="DMACINML_00466"
      /EC_number="2.7.8.7"
      /inference="ab initio prediction:Prodigal:2.6"
      /inference="similar to AA sequence:RefSeq:CAL35518.1"
      /codon_start=1
      /transl_table=11
      /product="holo-[acyl-carrier protein] synthase"
      /protein_id="Prokka:DMACINML_00466"
      /translation="MRIGCDIVAISRIDIYQKHGNAFLDKFLNQNEQKLIKSSSTLA
      GFWAAKEAASKALGVGISKECGFLDIEILKDSKNAPHLKLASHVLEKFKITSTSLISIS
      HDNGFAIAVVALD"
gene  complement(200620..201042)
      /locus_tag="DMACINML_00467"
CDS   complement(200620..201042)
      /locus_tag="DMACINML_00467"
      /inference="ab initio prediction:Prodigal:2.6"
      /inference="similar to AA sequence:RefSeq:CAL35519.1"
      /codon_start=1
      /transl_table=11
      /product="putative membrane protein"
      /protein_id="Prokka:DMACINML_00467"
      /translation="MKRVKARIRANFRNRIRKRLKGSLEKLAGTILLCAIVPLAICG
      YLFIVIVGTFNTARARQGVRLDHFVNASLFNGYAWESVSSHAWRERNRKKWAKVVI
      KITDFFQKDHCKRANKREQPVVDFILSRNLDKQTIGKR"
gene  complement(201039..202409)
      /locus_tag="DMACINML_00468"
CDS   complement(201039..202409)
      /locus_tag="DMACINML_00468"
      /inference="ab initio prediction:Prodigal:2.6"
      /inference="similar to AA sequence:RefSeq:CAL35520.1"
      /codon_start=1
      /transl_table=11
      /product="putative cytochrome P450"
      /protein_id="Prokka:DMACINML_00468"
      /translation="MSQCPFFPKPYKNKASTLLTFLLRKRSWLDGLYERSYKMQTGYV
      KMPNFDLYVINDTKEVKRMMVDEVKEFPKSAFLHELLSPLLGESIFTTNGEVWKKQRE
      LLRPSFEMTRISKVFNLMSEAVSDMMKRFEKYPNASIIIEVDEAMTFVTADVIFRTIMS
      SKLDEEQGKKILDAFVTFQEQSVHTAMRRMFRFPKWLSYVLGDRKRAKAGDVIRQALS
      DIIKPRYDAVSSGKVEDFEDILGSLLLVVDAQTNQRFSFEEILDQVAMFLAGHETTA
      SSLTWTLYLLSLYPDEQEKAYKEIIQVLQGEDIQISHLKQFKYL TNIFKESRLYPPV
      GFFAREAKKDKVRDKMIKKGSGVVIAPWLIHRHEGFWTNPHEFKPSRFEGEYKKDAY
      LPFGVGERICIGQGFAMQEAILILANILKKYKLELEEGFVPDVGRLTIRSANGMRIK
      FSKRES"
gene  complement(202406..203527)

```

CDS /locus\_tag="DMACINML\_00469"  
complement(202406..203527)  
/locus\_tag="DMACINML\_00469"  
/inference="ab initio prediction:Prodigal:2.6"  
/inference="similar to AA sequence:RefSeq:CAL35521.1"  
/codon\_start=1  
/transl\_table=11  
/product="putative integral membrane protein"  
/protein\_id="Prokka:DMACINML\_00469"  
/translation="MDREVFYIAGYDPKSYRFYYDLFKKLNLDYSHRFDLKAKMGGIE  
KNGNFPFFKINCENTQTRYHFLTWNDIVKKNWSQSYKDALMDCYSFFRIYTITGLFLK  
FGKESIYQLVTGYPPFFYVIFSLLSLGLALGSFVFLQDYIPSFLAIVIGIVLGFLLN  
RFLFKLGRKLAVFWIARICAFCATWKEKRLGAMEQRIKLFADAILKFLKQENKQDYE  
LILVAHSVGTIVCIEVLEHILKQNLDDKVLKILTLGECIPLTSYQKNSDGFRRKL  
EFVSAFDLKWYDYTSIIDGACFPQVDFRTSGVKANFTPPFLSAKFHTLYEKNEYKKI  
KRDKNAHFLYLYSPHIKGSYDFFAFIVAPKFLEEKVKI"

gene complement(203594..204778)  
/locus\_tag="DMACINML\_00470"

CDS complement(203594..204778)  
/locus\_tag="DMACINML\_00470"  
/inference="ab initio prediction:Prodigal:2.6"  
/inference="similar to AA sequence:RefSeq:ABS43455.1"  
/codon\_start=1  
/transl\_table=11  
/product="capsule polysaccharide export protein KpsS"  
/protein\_id="Prokka:DMACINML\_00470"  
/translation="MKFRDKIKKEFSGKNVLLLQGPVGTFFHRLAIKMKKNKTKVFKL  
NFNGGDFLFYPSGKRCKCDEKDLNFYENFFKEKKIDAIVMYNDCRLIHAKAIKVAKE  
LGIGIWIIFEEGYLRPYCITFEKDVNANSSLPDKNFYLSNISTKESIKEIPGGKFF  
MAFSAFLYWLFSFLLAPFFNKNLHRTLYPFEFLFWFSSLYRKYLYKFTTEKLNQKIY  
SLEKKYFLAILQVYNDTQIKHYYKKNIEEFIEETILSFANHARAKSYLVFKHHPMDRG  
YRNYSKLINELSQKYHVEGRILYVHDTYLPDLLKRALGCITINSTVGLSAILGECPTK  
VCGNAFYDFEGLAYPKKLQFFWREAHAYKPNPNLVLNFKNYLLNTNQFNGNFYKNSFL  
SR"

gene complement(204775..206802)  
/locus\_tag="DMACINML\_00471"

CDS complement(204775..206802)  
/locus\_tag="DMACINML\_00471"  
/inference="ab initio prediction:Prodigal:2.6"  
/inference="similar to AA sequence:RefSeq:ABS43950.1"  
/codon\_start=1  
/transl\_table=11  
/product="capsule polysaccharide export protein KpsC"  
/protein\_id="Prokka:DMACINML\_00471"  
/translation="MKFHSTSKLIKVKDFYKIVLYKAYKSIDKEDVFGWGRKNSG  
LKAIALAKKHHAKFMLEDGFLRSLNLGIENSPSFSIVKDDVGIYYDASTPSRLENIL  
NTYEFSPKELAWAKKAIELIKKEKLSKYNNNLCIPQELFSANEERVLITQVANDASL  
RFGLASDFSTQDIINDALKENPNAKIYIKIHPDVLGKQSDFSMQDLPSCVILKEN  
YNPIELLSHFKKVYTKTSGMGFEALMLGCEVCYGMFPYAGWGLTQDKLECKRRVKKR  
SLEEVFCAAYILYSEYFNPYLNQKSDIFDITFTLARYKKIEQVNSHTLYFLGFTLWKR  
WFMKPPFKAKNNKIIFLNSLNELYKANLNSDKIFIWGKKYDKALLTKDFKNEIFLVE  
DGFLRSVFLGSDLTRPFLIVDSKGLYVDPNHPDLEEVLQNHFDLTLRQRAKLLII  
TITQNKFSKYNGLKHEKLDFTNKKIILIPAQVEDDASMI LGGAGFDLKLQSVRAA  
NKDAFIVFKPHPDVLSGNRKGLKDKDIILKYCDEIENVSIDSAINACDEVHTITSTS"

GFDALLRGKKVVYVGKPFYAGWGLTQDLHHISRRTVLSLEELVAGVLILYPRYIHPK  
 SKNLCEVELALDIMLALQKDYFSKRWLRILIDFRILMLRKIRIRICEVFIKR"

gene complement(206838..208529)  
 /locus\_tag="DMACINML\_00472"

CDS complement(206838..208529)  
 /locus\_tag="DMACINML\_00472"  
 /inference="ab initio prediction:Prodigal:2.6"  
 /inference="similar to AA sequence:RefSeq:EAQ72594.1"  
 /codon\_start=1  
 /transl\_table=11  
 /product="galactosyltransferase"  
 /protein\_id="Prokka:DMACINML\_00472"  
 /translation="MKTVGVIPIYVVEKYLRECLDSVINQSYTNLEIILVNDGSTDE  
 NSLNIAKEYTLKDKRITLFDKKNGGQSTARNVGIEYFSGEYKLNKNTQSIKENSLEIF  
 NIEGNPVEIYTVYKSYKAFNDEKDLTKFTYPIIDYIIFLSDDDYWELNCIEECVPRM  
 DGVEVWVFDYKFLYNEFKPDPMPYKSMFEYAYISKECIINSSEWKDIILNSQAGLFWFG  
 WHGMIRFPYLKEIKLKFINGIIHEDHHFGIVLFALSKLIYIYRKYVYIYRVRSNSTCN  
 HSGSNEPCIPSYLSVLLNLCNLNKEQIFKYNKYYSYCLIKELDLFFNMYKDDIFFEIL  
 RKRFLPIYKAVCLNIFDLYCDPLNIFPKLPDFFITFLKKNKKEIENLNAIQEKKNM  
 NEQIQIQIQLNLIKNKEEVIQIQIQLNLIKNKEEVIQIQNNQIIFQAKYGMAS  
 RIQNQLSYKLGQAMIINSKSLGYLIMPMILLNIIISHKQAQKAYKLIKKNPNLALP  
 PLESYPDYKEALKEKECLTYKLGEALIKASNNWYGGGYIKLLLEIRKLLKEFKKK"

gene complement(208559..208993)  
 /gene="lacA"

CDS complement(208559..208993)  
 /gene="lacA"  
 /locus\_tag="DMACINML\_00473"  
 /EC\_number="2.3.1.18"  
 /inference="ab initio prediction:Prodigal:2.6"  
 /inference="similar to AA sequence:RefSeq:SQE24952.1"  
 /codon\_start=1  
 /transl\_table=11  
 /product="putative sugar transferase"  
 /protein\_id="Prokka:DMACINML\_00473"  
 /translation="MSDKCKIVIGDNCFFNGGNISLLCGEMNTHIDIGNDCLFASDIT  
 LATSDNHSIFNKETKRLNYAGNIVIGKHCWICDDVKILNHSYIGDECVIATKALVVS  
 FPKKLFSSFYQPPNCCIIGGIPARILKKNIVWHREIKEFLE"

gene complement(209083..209277)  
 /locus\_tag="DMACINML\_00474"

CDS complement(209083..209277)  
 /locus\_tag="DMACINML\_00474"  
 /inference="ab initio prediction:Prodigal:2.6"  
 /codon\_start=1  
 /transl\_table=11  
 /product="hypothetical protein"  
 /protein\_id="Prokka:DMACINML\_00474"  
 /translation="MVIKNNDERLQNIKICGVNNEIYGIDYVPSICNLNISIFGNMKN  
 VYIPKDLKINKNKGGGYLLI"

gene complement(209349..210830)  
 /gene="mshA"

CDS complement(209349..210830)  
 /gene="mshA"

```

/locus_tag="DMACINML_00475"
/EC_number="2.4.1.250"
/inference="ab initio prediction:Prodigal:2.6"
/inference="protein motif:HAMAP:MF_01695"
/codon_start=1
/transl_table=11
/product="D-inositol-3-phosphate glycosyltransferase"
/protein_id="Prokka:DMACINML_00475"
/translation="MLKHVIHCHQAFDLKKGGSVGYISSLCEAFRRYNDNFLDKKTK
CSFLFPDIPTDQYIPNDILEIIVEQRFKYTQNYHIKTVSKNLLQKRQDWFREIIPFSE
YVKIDPKNIASIIHIGAYNFLPIYNSLIRLGVDSRVVKILTTTHNPYQPTMEDMYLTCR
NMKWRNDDKEMFYFNERDKWAFKLADCLFFPTEESLEGYKLPWFASLIKPKPIY
FCPTGTAINKPADDKFLKESLNIPKDAKIFLYLGRFIDVRGYDILIDAAKQIISKND
KIYFIVVGEKHVVPINSKQWIQIPFTDKPQEYINIADACLCPNRGSLFDLSMIEFLAF
GKPIICSYVGGYRWLENKTSGLVYSSVEDIDKFADNILLFSQFSREKINKMQNDNLNL
YKKCLSLNSFQENYCNIDNIYRDFGISKKMYSISYCDKASVFSNLADNKKEFFTKGE
PVIKSLEIAKKVESKQEIFNRKFKKLMRNPYVFFKDFLIKRLG"
gene complement(210834..211562)
CDS /locus_tag="DMACINML_00476"
complement(210834..211562)
/locus_tag="DMACINML_00476"
/inference="ab initio prediction:Prodigal:2.6"
/codon_start=1
/transl_table=11
/product="hypothetical protein"
/protein_id="Prokka:DMACINML_00476"
/translation="MLNHYIILPSEDLHYIKLKDQLVKKKNINVKVIYTDYVVFHSL
PIGIQFYDKEIIDISSIVDLKKGDALPISLKLMLIDFKNTSSIHILIGNKQLFFLLQ
ILEILHATSIKIFWTRLGDFQVKRINNQQSEISIIIEENFLNLNEIKIKNYIMQICKEE
IKIPLKTIKYNFSSNATLSQHNGNYEVVFSVQDKILLRSFISFQKQIVNTVDNINPI
KRKIKKLIKPKRFFKDFIICKIR"
gene complement(211556..213550)
CDS /locus_tag="DMACINML_00477"
complement(211556..213550)
/locus_tag="DMACINML_00477"
/inference="ab initio prediction:Prodigal:2.6"
/inference="similar to AA sequence:RefSeq:CAL35547.1"
/codon_start=1
/transl_table=11
/product="putative sugar transferase"
/protein_id="Prokka:DMACINML_00477"
/translation="MNQIGVSIIVPCYNVADYVVGKCLQSLCKQTL EEIEIIIINDGST
DGTHLVIEDFIKKNKISSIQYCKENGGYGSVNLGIYHAKGEYIAICEPDDYVDEMY
YEILYKIAKDENDVLYNGYIENRPFYGHLAITTYTSVKLNCVLSTEELKNRFLSCG
TAIYAAIYRKIFLLDNQITLPETCKVYQDVPFVAKVFSICKKIRYVMGAKYYYYLRGRA
EQSVANPSRFVDIIPAIDKLVFLISNENKLLLDKAYVLGFAVAHLIGRYQISIAENA
LDTAEKIKNYIETVLCDDVILQLYSKNFLKNNGFNVDKVLIREVDLNPVNYSLPTIQ
NFSLQASYNEIISYMLKLLFAQNENFSFNILKTLWELSYFINIPMADPGEQIKEVC
LKLNSYNANILINKFPKLVAYISVLLNNSIEELTIPVPRREDGAQILDWFYNRSIAI
KANLNTQTDLCKEIKDYFNQSEERFLSYIENKTCVVGNSPCELNKNKGCVIDNYDIV
IRFNKYKTNFGEKDYGSKTNVWAVSPALETITTKDLSQDFMISNDSSFYTSPFERSS
IYKIMLLDLPPFQIQTLFIKRTQLRTL SHGIVMLCYLLKHRERLKDFAYYGFSLEEQ
SQGISHYNGDPSSGKILPFHNWNKEAKILQQINKELKQC"
gene complement(213554..214831)

```

CDS /locus\_tag="DMACINML\_00478"  
 complement(213554..214831)  
 /locus\_tag="DMACINML\_00478"  
 /inference="ab initio prediction:Prodigal:2.6"  
 /inference="similar to AA sequence:RefSeq:AJK71602.1"  
 /codon\_start=1  
 /transl\_table=11  
 /product="glycosyl transferase family 2"  
 /protein\_id="Prokka:DMACINML\_00478"  
 /translation="MKNFKISIIIIPSLNSITYICECVDSVLNQLKDIEIICVDAGST  
 DGTLEVLREYEKNDERLKVIVSDKKS YGYQMNLGIKEAKGEYLGIVESDDYIKENMYE  
 NLYNIAIEKKCDIVKGDMLNFWDK EERVY EYRLLNWTEVLYNKILNFKTKRILTESN  
 IINPSGIYKLDFIKKYNILCNETPGSAFQDTSFWFQLQVLASSIFLVKEAYYYRQDN  
 INSSCNLDKIYCICEEYDFIEQFVLKNKFYDILRIVHYLR YRGYRWNL YRIHSSYRL  
 EFLYKFQKDFKRLKTISENSFSLFKKWEIEQLQEIMSNPKKFYNEVARYKKGAI EFME  
 NTPEYKIGKQAIICKSRKDFVELFRLINTNTTKPNGNLEKKYCDY YEGQSYKEHLSYK  
 IGKILLGLKNNYFLALTIPFQIVFCYIKFKLKG"

gene complement(214839..215930)  
 CDS /locus\_tag="DMACINML\_00479"  
 complement(214839..215930)  
 /locus\_tag="DMACINML\_00479"  
 /inference="ab initio prediction:Prodigal:2.6"  
 /inference="similar to AA sequence:RefSeq:AJK71603.1"  
 /codon\_start=1  
 /transl\_table=11  
 /product="UDP-galactopyranose mutase"  
 /protein\_id="Prokka:DMACINML\_00479"  
 /translation="MYDYLVVGTGLFGSIFAYEASKKGYKCLVLEKRSHIGGNCYTEN  
 IENINVHKEYGAHIFRTSDENIWKYMQQFCRFNHVNSPIANFKGEIYNL PFMNTFSK  
 LWGIFSPKEAREIITKQSQEIQGI PRNLEE HVIK FVGRDIYEK FVKGYTEKQWGRDCK  
 DLPASII RRIPVRYIYDNNYFNDPYQGIPIGGYTAIF EKMLENCEVLLNIDFLKHKKE  
 FQNKAKKIIFTGTIDSFYNYEYGP LEYRSLRFEHKILNTDNYQGVAVVNYTDKETPYT  
 RTIEHKHF EFGKQEKTVVSE EYPLEWTKDIEPYYPINDDKNQKLYEKYLELAKKETNV  
 YFGGRLGEYKYDMQDSVKSAL EFSKKE"

gene complement(215976..217364)  
 CDS /locus\_tag="DMACINML\_00480"  
 complement(215976..217364)  
 /locus\_tag="DMACINML\_00480"  
 /inference="ab initio prediction:Prodigal:2.6"  
 /inference="similar to AA sequence:RefSeq:CAL35255.1"  
 /codon\_start=1  
 /transl\_table=11  
 /product="putative glycosyltransferase"  
 /protein\_id="Prokka:DMACINML\_00480"  
 /translation="MQTKTVGVVPIIYNVEKYLRECLDSVINQSYTNLEIILVNDGST  
 DENSLNIAKEYTLKDKRITLFDKKNGGQSTARNVGI EYFSGEYKLNKTKS I KENSLI  
 EFNIEGNNPYE IYTVYSYKAFNDEKDLTKFTYPIIDYIIFLSDDDY WELNCIEECVP  
 RMDGVEVVWFDYRAVYDKV KRKHL SQMTHFDYKNEVIITSKEWLDRAKERRLFYFWFA  
 WQGMVNFTFLKNIKLKF IKGIFAEDCHFGVLLFALS KNIIYIFPKQIYIYRLRESSSMN  
 FTRKKWAIHPD SHLKKIDIFENSNETR LYETT SWMQIALEFIKF IHSKHLSDEIKQ  
 HF LPPVCNKAL TLQFKDPLYLK KYAKNLKIYIQNQPLGAVSRVKEYLSYKIAKEIS  
 RKKSIMKLT LAFSVVKVSVQH QKEVRRYK KDIKRDV LNKRLPLEFYR DYQKAIKLNK  
 FKKFLIQSIFYK"

gene complement(217354..219000)

CDS /locus\_tag="DMACINML\_00481"  
complement(217354..219000)  
/locus\_tag="DMACINML\_00481"  
/inference="ab initio prediction:Prodigal:2.6"  
/inference="similar to AA sequence:RefSeq:CAL35551.1"  
/codon\_start=1  
/transl\_table=11  
/product="putative sugar transferase"  
/protein\_id="Prokka:DMACINML\_00481"  
/translation="MPLLSVIIPFGLSKERSYIQERVYEKAQYFKTDEKIEFIFVEGY  
SSQEHNLKTYILKNNHIYLNKDESQKEYFSQGKCRNFGASYANASVLLFLDLDFISFD  
SLEKILKLIKIKNILNPNALLVLPVVYLTQEASEILKEYPMDLWDVLIQEDLISGKN  
FLVKFFAPSSTSLIINRHKFLIIGNNENFIGHGIEDFDL FARVLNSCLKFEKVPLN  
LNYDSRNWNFYFSGFRSWFSLLGYELCFYGIYMYHLWHIEPNQNGYMDKKHKNHKL  
YKHLKKIKDYSIDPLQISSVKNTKILVIANKKYNFRALS VYLGKFVYKSLDELAYQNK  
KEIEIYLQEEKFDKILLDKNIYNEDLHEIFKNYLCVYFELGILPDSWLFYKDTNELYD  
RRYWDIDLKLIKEMQAYITSLKFEKKKILTFIQKLGFSKDDDLKIVFYLNKELY  
SFAKNDGFYQIIFDKKMLMLGNVDKEYYSLKSFVYKPYLYEIKRVRFFSKILEFLGL  
NFLLSLISQTKFYRLARKLFFNPRDFKDSKFYKRHNAN"

gene complement(219006..219953)  
/gene="kpsF"

CDS /locus\_tag="DMACINML\_00482"  
complement(219006..219953)  
/gene="kpsF"  
/locus\_tag="DMACINML\_00482"  
/inference="ab initio prediction:Prodigal:2.6"  
/inference="similar to AA sequence:RefSeq:CAL35552.1"  
/codon\_start=1  
/transl\_table=11  
/product="D-arabinose 5-phosphate isomerase"  
/protein\_id="Prokka:DMACINML\_00482"  
/translation="MDALKTAKEVFATEAKAIEDLALNLDENFSKAIELMLHTKGRCI  
VSGMGKSGHIGAKIAATLASTGTPSFFIHPGEALHGDLGMLTPDDVLI AISNSGETEE  
ILKIIPAIAIKRRIPLIAMCGKKNSTLVKQGDIFLNISVKEEACPLQLAPMSSTATLV  
MGDALAAALMKARNFRPDDFALFHPGSLGRKLLTRVSDLMVSKNLPVHPDTEFNDL  
VDVMTSGKLGCLVLENEKLVGIITDGLRRALKANDKPRDFKAKEIMSINPKVVDA  
DAMASEAEEIMLKYKIKEIVSKEDKVVGGIIQLYAIGNV"

gene complement(219963..221594)  
/gene="kpsD"

CDS /locus\_tag="DMACINML\_00483"  
complement(219963..221594)  
/gene="kpsD"  
/locus\_tag="DMACINML\_00483"  
/inference="ab initio prediction:Prodigal:2.6"  
/inference="similar to AA sequence:RefSeq:CAL35553.1"  
/codon\_start=1  
/transl\_table=11  
/product="capsule polysaccharide export system periplasmic  
protein"  
/protein\_id="Prokka:DMACINML\_00483"  
/translation="MKKILILFLSCIFCGAIDVSQISAGGNSSTSSSQNIENNISK  
SAPTQIPVFGAELFNGNFKNYTRVYNPDYKIAVGDQISLKIWGAVEFEQILVDSQG  
NIFIPKVGAVNLLGVKNSALVSVIKAQVNIYKNNVVFYADMNAYQNVSVFVTGSVNA  
PGLYQGLSSDSVIQYLDKAGGINLEYGSFRDIQILRNNAVIKKIDLYDFLLKGQMDLF"

PFRSGDVVLVGNVQSYVFNVDVQRPFRFELANDIKTLFDLARVAGAKPIVTNAILRS  
 YGNHKLKLEVSAYNKMVQSKVLLKTGDEVQFNPEYISQNISITVNGEHSGLKTLVVRKG  
 TTLEDVSRILIVANGQSDMNALQVFRKSVAKTQKDLINAQLKELETALTSPSVTSQGA  
 AIKAEQAKLILEFIQRARELEPKGQIVIDKPKSYGEVILEEGDTINVPSKNNLIIVQG  
 EVTLPGAFVYNKGEDLKYYINLAGGYGERADTSKVLVIRNNGKAQRYSGSVDMMPGDS  
 VLVLPKVESENQIFSMILTQILYQIAVATNVVLLNI"

sig\_peptide complement(221517..221594)  
 /gene="kpsD"  
 /locus\_tag="DMACINML\_00483"  
 /inference="ab initio prediction:SignalP:4.1"  
 /note="predicted cleavage at residue 26"

gene complement(221596..222711)  
 /gene="kpsE"  
 /locus\_tag="DMACINML\_00484"

CDS complement(221596..222711)  
 /gene="kpsE"  
 /locus\_tag="DMACINML\_00484"  
 /inference="ab initio prediction:Prodigal:2.6"  
 /inference="similar to AA sequence:RefSeq:CAL35554.1"  
 /codon\_start=1  
 /transl\_table=11  
 /product="capsule polysaccharide export system inner  
 membrane protein"  
 /protein\_id="Prokka:DMACINML\_00484"  
 /translation="MTKINTFFNKIKDLSIFDSFKIVWILMIFVIIYYILIAADRYVS  
 TITMSVKSTTGSTQASGVLSTLTSNTSEDIKFLQGYIESLDMKILDEKIHKKLY  
 NEQYIDLFFSLSSSSSIESYLKYYQSRVKVHVDDKTGLLNVEVEGFTPESAHLIAKTI  
 MQESEKFINEISHKAAREQMSFAEEELVKYKERYQKAQNDLIAFQNKYGVFDPKQAE  
 AKAGLVTQLESDIAQREAKLLTMQSYMNDHAPEIVTLKAEIAALKKQLVKERSKISAD  
 NSSQKLNDLAAKFQDLTIEAGFAQSAYEAALKAYESARIEALRKIKQLVIVQTPDVPQ  
 SAKYPEKIYNILTAFIVLSLIFGVIKFVKMIIIEEHKY"

gene complement(222711..223373)  
 /gene="kpsT"  
 /locus\_tag="DMACINML\_00485"

CDS complement(222711..223373)  
 /gene="kpsT"  
 /locus\_tag="DMACINML\_00485"  
 /inference="ab initio prediction:Prodigal:2.6"  
 /inference="similar to AA sequence:RefSeq:CAL35555.1"  
 /codon\_start=1  
 /transl\_table=11  
 /product="capsule polysaccharide export ATP-binding  
 protein"  
 /protein\_id="Prokka:DMACINML\_00485"  
 /translation="MIKVLNLTKSYPLFNGGRHYVFKDFTFEPENCISIGLMGRNGAG  
 KSTLMKLLSGSEL PDRGKIITNKKFSWPLGLSGAFQGS LTARDNAKFVARVYGYK GEE  
 LHEKVKFVEDFAELGKFFDEPMNTYSSGMSARIAFGLSMAFDYDLIDEAGAVGDPK  
 FREKSHKLYKERLSQSKVIMVSHNVAEIKEWCDKIIIFMENGKATVYDDVDEGIAVYQG  
 KK"

gene complement(223370..224152)  
 /gene="kpsM"  
 /locus\_tag="DMACINML\_00486"

CDS complement(223370..224152)  
 /gene="kpsM"

```

/locus_tag="DMACINML_00486"
/inference="ab initio prediction:Prodigal:2.6"
/inference="similar to AA sequence:RefSeq:ABS44297.1"
/codon_start=1
/transl_table=11
/product="capsular polysaccharide ABC transporter,
permease protein"
/protein_id="Prokka:DMACINML_00486"
/translation="MLNVIHALFFRELKTRFGKNKYLGFWVIGEPMSVILMLTIIVT
IIREYHHQLMPEGISIFMFLISGIVPYFMFRSIVTQLMNGIAANLPLFAYKPKPIHV
FIARTLLEFCIYFVIFVAVLFIVGWFFRLEVIPRHFLSVMICIFLLMCSGFALGMVFA
IIGYFLEPLKTLNLYFSIVFYWGSVIFPTWLMPKPILDIFYYNPLLHVMELLRFNFF
ENYPLQDDYTYTYPVFCIICTSFVGLFLYYYNRQALTAVRRT"
gene complement(224211..224627)
CDS /locus_tag="DMACINML_00487"
complement(224211..224627)
/locus_tag="DMACINML_00487"
/inference="ab initio prediction:Prodigal:2.6"
/inference="similar to AA sequence:RefSeq:CAL35557.1"
/note="hypothetical protein Cj1449c"
/codon_start=1
/transl_table=11
/product="hypothetical protein"
/protein_id="Prokka:DMACINML_00487"
/translation="MDERILEFIKNEQLLSWAMSDEKGVYIANAFYAFDEKNLAFIIA
SHEDTKHIKLAENPSIALNIAKESKIAFLKGIQAKAKFKSASKEQIKIYFSKFPFAK
LDKSAKIYALELDWLKFTNNALGLGKKLEFYKDKIL"
gene 224704..225267
CDS /locus_tag="DMACINML_00488"
224704..225267
/locus_tag="DMACINML_00488"
/inference="ab initio prediction:Prodigal:2.6"
/inference="similar to AA sequence:RefSeq:AMK28270.1"
/codon_start=1
/transl_table=11
/product="ATP-binding protein"
/protein_id="Prokka:DMACINML_00488"
/translation="MQIDASKNQSFSDYTTKSGKHLALSMYDNQSLSYSNDEEGKSL
NLKRQYGFSTFEGSKLTQADLDEIKNAMKEVEPMIKDFLANSKVGELKPKKEIIESAM
QMANVLPNDENHQNAIMNFTNKFSDLLKQNSNDKIDINASMLEDSKLLDEVLEQ
MKKQLEKQEKAKENQNAEKGLNLYA"
gene 225307..225996
/locus_tag="DMACINML_00489"
CDS 225307..225996
/locus_tag="DMACINML_00489"
/EC_number="3.6.1.23"
/inference="ab initio prediction:Prodigal:2.6"
/inference="similar to AA sequence:RefSeq:CAL35559.1"
/codon_start=1
/transl_table=11
/product="dUTPase"
/protein_id="Prokka:DMACINML_00489"

```



```

/translation="MKNVEILENMLKLQQLNDETNGLNWEEGYTKEGKLISWRRCIY
MECAELIDSFawkHWKNISSPTNWENVRMEIVDIWHFILLSLLEEYTNKKDKNFQATA
NEIISVSVFQDFCKEEGNPSENDLYSILNDIELIIHKCSGFGFSLGELLSNYFILAIK
CGLNLEILYKTYIGKNILNIFRQNNGYKQGTYYKKDWNGKEDNEVLAEILEQELDFDTI
YKKLEEYYKKV"
gene      225998..226708
          /locus_tag="DMACINML_00490"
CDS      225998..226708
          /locus_tag="DMACINML_00490"
          /inference="ab initio prediction:Prodigal:2.6"
          /inference="similar to AA sequence:RefSeq:CAL35560.1"
          /codon_start=1
          /transl_table=11
          /product="putative integral membrane protein"
          /protein_id="Prokka:DMACINML_00490"
          /translation="MKILRLAIKDFFTLQFLKFALIPLTFSFILMIFLAIKFGSFLLD
YFNSLFSVGEDSFWAWFYALHFVQILITLISVLFSGFVIIIFASVFLALFITSFLTPLI
VKQINNKYHHHEVQNISNMYIIFEIFKIFLKFIFLCTLALFLPFINLFFVYLAIFY
YLFHKLMLDITSSVLDKENFKIFNAQASTFEFKFSTLCFYLLSSIPLLGIQVFFV
IFLTHLAYQRILKLEVKG"
gene      complement(226691..227656)
          /gene="tilS"
CDS      complement(226691..227656)
          /gene="tilS"
          /locus_tag="DMACINML_00491"
          /EC_number="6.3.4.-"
          /inference="ab initio prediction:Prodigal:2.6"
          /inference="similar to AA sequence:RefSeq:CAL35561.1"
          /codon_start=1
          /transl_table=11
          /product="putative tRNA(Ile)-lysidine synthase"
          /protein_id="Prokka:DMACINML_00491"
          /translation="MQIKDEILSLLKKGRNLLAFSYGSDSSALFHFLVQKKIDFDLVM
INYKTRKNSDLEEQAkakELALEFHKKIFIKIAPVIKGNFEKEARDFRYDFFEKICLEQ
NYDKLILAHHLNDQLEWFLMQLSRGAGLAEILGMQECEKRQNYTLLRPLLFTSKDEIL
SYLKENDIFYFQDESNENEKYFRNYIRKNFSNAFVSKFHQGLKRSFFYLDEDRKKLYD
LESIKEIQGLMICPKNESLIAKVVKMGLLLSAAQRKEFLKGDVCLGGKIGIVYKDEK
AIVFKYEICQKLPKEFKEACRIAKIPRLLRAYLYNHKIDISALNF"
gene      complement(227646..228965)
          /gene="yliG"
CDS      complement(227646..228965)
          /gene="yliG"
          /locus_tag="DMACINML_00492"
          /inference="ab initio prediction:Prodigal:2.6"
          /inference="similar to AA sequence:RefSeq:ABS43656.1"
          /codon_start=1
          /transl_table=11
          /product="MiaB-like tRNA modifying enzyme YliG_"
          /protein_id="Prokka:DMACINML_00492"
          /translation="MSKLYLMSLGCNKNLVDSEIMLGRLSAYELCDEPSKADVLIIVNT
CGFIDSAKKESINAILDLHEQRKKDSSLVVTGCLMQRYREELMKELPEVDLFTGVGDY
ERIDEMILKKTNLFSNSTYLQGENSKRIITGSNSHAFIKIAEGCNQKCSFCAIPSPFKG

```

```

KLKSREISSIIAELKDLVARGYKDFSFIAQDTSSYLFDKGEKDGLIRLIDEVEKIEGI
KAARILYLYPTSASEALIKRIIASKIFVNYFDMPLQHISDNMLKIMKRGANSTRKEM
LNLMSAPDSFLRTGFIVGHPGESDADFEELCEFIKDFGFDREVSVFAYSKEEDTAAFD
MEQVPFKVINKRLKIIIEKIVDEVIEKSFEKEVGKKRLVVCTGESSEGEFFIAAKDLRW
DREIDGEILINESECGNLEMGQIYECEIIQNVDKCLI AKALRKIDAN"
gene      229039..230136
          /locus_tag="DMACINML_00493"
CDS       229039..230136
          /locus_tag="DMACINML_00493"
          /inference="ab initio prediction:Prodigal:2.6"
          /inference="similar to AA sequence:RefSeq:AGQ94588.1"
          /codon_start=1
          /transl_table=11
          /product="peptide chain release factor 2"
          /protein_id="Prokka:DMACINML_00493"
          /translation="MDNYEFSELLKTLKNKVGNIASIIKPENIQTRLKKIEELENLSPS
FWNDVKQAGIIGKEKTKITNLLKNYENAFNALNDASELFDLANSENDETLEALFNDA
PKLEDTITSLEISMLLSGENDGKNAIVSIHPGAGGTESNDWASILYRMYLRFRCEREGF
KVETLDFQEGEEAGLKDVSFLVKGENAYGYLKAENGIHRLVRTSPFDSAGRRHTSFSS
VMVSPELDDIEIEIEEKDIRIDYRASGAGGQHVNKTESAVRITHFPTGIVVQCQND
RSQHKNKATAFKMLKSRLYELELMKQQDSANAGEKSEIGWGHQIRSYVLPFYQQVKDN
RSGEAFSQVDNILDGDIKKMIEGVLIALKSE"
gene      complement(230219..230611)
          /locus_tag="DMACINML_00494"
CDS       complement(230219..230611)
          /locus_tag="DMACINML_00494"
          /inference="ab initio prediction:Prodigal:2.6"
          /inference="similar to AA sequence:RefSeq:ADC29315.1"
          /codon_start=1
          /transl_table=11
          /product="putative lipoprotein"
          /protein_id="Prokka:DMACINML_00494"
          /translation="MKKILTSALALGVMTLIIGCGDGLVELKNNGNDQAMFDLGNQE
IMKEYPNYKLYDYTSVRAISDFKDPEGKIKEMKRDLEIDKYPYSNYVFLNPNDDKDY
KVVVYCYCSDLKKRIYCPVVDAYRIYAR"
gene      complement(230732..231850)
          /gene="truD"
          /locus_tag="DMACINML_00495"
CDS       complement(230732..231850)
          /gene="truD"
          /locus_tag="DMACINML_00495"
          /EC_number="5.4.99.-"
          /inference="ab initio prediction:Prodigal:2.6"
          /inference="similar to AA sequence:RefSeq:CAL35565.1"
          /codon_start=1
          /transl_table=11
          /product="tRNA pseudouridine synthase D"
          /protein_id="Prokka:DMACINML_00495"
          /translation="MNLA EENTIFKPLYSLKHSPINAYFSKNSDDFVVRERPLYEFSG
KGEHLILHINKKDLSTNEALRILSELGSKMRDFGYAGLKDKQGSTFYLSMPKFFES
FLANFHPKLIKILETFIHENKLRIGHLKGNSFFIRLKKVLPDALKLEQALINLDKQG
FANYFGYQRFKFGDNYKEGLEILRGKMKNVKMKEFLISAFQSELFNRYLSKRVLS
HFANDFTEKELAQIYSISKEEAKELKKQEQQFKLLKGEVLGHYPFGKCFLEDLSAEL
ERFKARDISAMGLLIGAKAYEASQGLALNLENEIFKDALEFKAKMQGSRRFMWSYLED

```

VKWRYDEQKAHFCMEFFLQKGSYATVVLEEILHKNLFE"  
 gene complement(231819..232640)  
 /gene="thiL"  
 /locus\_tag="DMACINML\_00496"  
 CDS complement(231819..232640)  
 /gene="thiL"  
 /locus\_tag="DMACINML\_00496"  
 /EC\_number="2.7.4.16"  
 /inference="ab initio prediction:Prodigal:2.6"  
 /inference="similar to AA sequence:RefSeq:CAL35566.1"  
 /codon\_start=1  
 /transl\_table=11  
 /product="putative thiamin-monophosphate kinase"  
 /protein\_id="Prokka:DMACINML\_00496"  
 /translation="MNKEDFIIKAFLNKNGDDGAIIVDKWCLSKDLFFENVHFKREWL  
 TLEQIATKAMLVNISDAIVMNAKPKYALLGLALPNSLGEDEIKALQKGF LKTAKKFNI  
 KIIIGDTISNDKIDISITIIISKVRNKAI FRKGLKKGHLLAYTGVLGKSLRGL EILQNG  
 GTLNSNHVFIKPKLRPDDFFYEIAPFISCAMDISDGLSKDLSRLLAQNKCGISWFKTLD  
 DYTLYSGEEYEILFAFDEKEYPKIEKIAKKHGKINIFGKAVKGKYEFSGREHFF"  
 gene 232722..233795  
 /locus\_tag="DMACINML\_00497"  
 CDS 232722..233795  
 /locus\_tag="DMACINML\_00497"  
 /inference="ab initio prediction:Prodigal:2.6"  
 /inference="similar to AA sequence:RefSeq:CAL35567.1"  
 /note="hypothetical protein Cj1459"  
 /codon\_start=1  
 /transl\_table=11  
 /product="hypothetical protein"  
 /protein\_id="Prokka:DMACINML\_00497"  
 /translation="MKNLELRIFRFDKQKDYEA YYPVVDNYENFATLYDLLLQVQD  
 DDIYFD FEKNDKSYIVNKEFLPLDTALDILVKKYDFNLTIEPLSTKRSVKDLIINKD  
 DFLEKFKYLAPFANEEDKKLYEKYDYL YSSEILDFLPEYMGDAVFYLASKMIEKYPN  
 KKIKILKTICDTQKGI FYHLPSKNEDLENI IKNLQKEIIDLKLIN EAALFDLPKINA  
 FDNEIKELGEVKYDFDNFNIACYGFKIKDDIKSKIKAHFISYENS DNNGFSLLHLNP  
 ELSYKMAANIILDAYDSGADFIVVNQAKDFYMFDTCSK KLMQSSGREFKDFVLSYFE  
 FLSLIQGIKNPSLQNHDLKVSLI"  
 gene 233792..234175  
 /locus\_tag="DMACINML\_00498"  
 CDS 233792..234175  
 /locus\_tag="DMACINML\_00498"  
 /inference="ab initio prediction:Prodigal:2.6"  
 /inference="similar to AA sequence:RefSeq:CAL35568.1"  
 /note="hypothetical protein Cj1460"  
 /codon\_start=1  
 /transl\_table=11  
 /product="hypothetical protein"  
 /protein\_id="Prokka:DMACINML\_00498"  
 /translation="MKISLECKDLII EKALELFLKEHLMVKKDCDFIISDEKISTQKP  
 LFIIAKNSPFLSVPFSKETLINS LNEFDSALKATAQK LADERRRVLEARIDEIANEFK  
 KDYQSKIDLAISELKDKLVKALMYE"  
 gene 234168..234857  
 /locus\_tag="DMACINML\_00499"  
 CDS 234168..234857

```

/locus_tag="DMACINML_00499"
/EC_number="2.1.1.171"
/inference="ab initio prediction:Prodigal:2.6"
/inference="similar to AA sequence:RefSeq:ANS24505.1"
/codon_start=1
/transl_table=11
/product="methyltransferase, putative"
/protein_id="Prokka:DMACINML_00499"
/translation="MNNEFVSVKDFLQGKKNIHFNSTQPNKKEKTKKTLPKLYTSIE
SGIYKGGKLLLPSLQTTTRSTKSIVKKCVFNVLRDLRNLKIFIEAFGGALMAAEALS
YALKAYAIELDLNAYKIALENAKNIDTNLKVIHANTFEMLPKLIKDSKEDIILYLDPP
FDIREGFSGIYEKIYNFLEKLLDALFCIILEHNSKIKTPDNIANFTKTKKFKGSTS
LSFYQKNILEE"
gene 234920..235966
/locus_tag="DMACINML_00500"
CDS 234920..235966
/locus_tag="DMACINML_00500"
/inference="ab initio prediction:Prodigal:2.6"
/inference="similar to AA sequence:RefSeq:CAL35570.1"
/codon_start=1
/transl_table=11
/product="flagellar P-ring protein"
/protein_id="Prokka:DMACINML_00500"
/translation="MRVLTFLLMLTSVFATQIKDIANTVGVRDNLIGYGLVVGLNG
SGDGTSSKFTLQSIENLLQGMNIKVDPNDIKSKNTAAVMVTAKLPAFAKSGDKLDITV
SSMGDAKSLQGGTLLLTALRGIDGEIYAIQAQGSISTGGLTARPGGTGSHSTAATVMGG
ANVEREIPQNFQIDDLTSLKLVADFKTASDIERILNTIFDEEVARAIDSRTVKKLKP
EDLSNVDFMARVLEQDIAYTPQSKVIIDERTGTVIAGVDIEVEPVLITHKDITIKIDP
NNNAAAQNEIDMKDGGFVDPNSNLRINNAKSTVANIARMLNKLKATPNDIIAIMEN
LKRAgainADLEII"
sig_peptide 234920..234970
/locus_tag="DMACINML_00500"
/inference="ab initio prediction:SignalP:4.1"
/locus_tag="DMACINML_00501"
gene 235966..236307
/locus_tag="DMACINML_00501"
CDS 235966..236307
/inference="ab initio prediction:Prodigal:2.6"
/inference="similar to AA sequence:RefSeq:CAL35571.1"
/locus_tag="DMACINML_00502"
gene 236371..236568
/locus_tag="DMACINML_00502"
CDS 236371..236568

```

```

/locus_tag="DMACINML_00502"
/inference="ab initio prediction:Prodigal:2.6"
/inference="similar to AA sequence:RefSeq:CAL35572.1"
/note="hypothetical protein Cj1464"
/codon_start=1
/transl_table=11
/product="hypothetical protein"
/protein_id="Prokka:DMACINML_00502"
/translation="MINPIQQSYVGNATLNTTKTDKETKTNDTQKTENDKAARIAEQI
KNGSYKIDTKATAQAIAESLI"
gene 236607..237041
/locus_tag="DMACINML_00503"
CDS 236607..237041
/locus_tag="DMACINML_00503"
/inference="ab initio prediction:Prodigal:2.6"
/inference="similar to AA sequence:RefSeq:CAL35573.1"
/note="hypothetical protein Cj1465"
/codon_start=1
/transl_table=11
/product="hypothetical protein"
/protein_id="Prokka:DMACINML_00503"
/translation="MLKQRLDEVNAILTKLIELTQEDIENIKIAKHDTVASSVEEKNK
LIAEFSAAKKRLDSALVELNNSSTKGLSELLDEEDKQKLDLLKKNLQTLHTTNKEYAK
FVLIVKDFLDGLVNKMFDMNDGTNNAYGDKKTTPEIFKINV"
gene 237051..238877
/locus_tag="DMACINML_00504"
CDS 237051..238877
/locus_tag="DMACINML_00504"
/inference="ab initio prediction:Prodigal:2.6"
/inference="similar to AA sequence:RefSeq:CAL35574.1"
/codon_start=1
/transl_table=11
/product="putative flagellar hook-associated protein"
/protein_id="Prokka:DMACINML_00504"
/translation="MGIFGTLTYGTGTLKASEVQIATTSNNISNANATFYTRQRVVQT
TNGFVTTGGVQVGTGTAIESIVRLHDEYSYKLGASNQLEYTKYMASTLEEIAQRFP
DLQSTGILQDLENYNKAWNDFASNPENATKIALVKASQTLTESVNNTFATLDKIQKK
VNDDIKNTVDEINRIGEEIATINKQIYQGEALPTDHANELRDRRDELELTLSKLVNAV
ASKNEINQDNRLDTTIIDPGHQYNLSIEGFSIVDGVNFHPLKLDYDDKNKAYSIIYET
PDEKVRDLTAKINGGQLGAQLDLRGRNYSKSEKYSYDGIQGYMDSLNTFAKTMINET
NNLYASSAKSSATSDYLPGLTEDIPLVNYDRTIQPGSFDIVYDDKGDKCLTKTITVD
VNTTMEDIMRQITANTDDNGNNANDDVDDHINASFSYDAKTGDSLQINAKSGFKVA
IEDKGTNFAGAFSIGGFFSGTNASDIKVKDSILNDPSTVRASLNGVDSGNDMANKIIQ
LQYSKVNFYNEGTIDNL TMEEYRKL TGKIGSDGENNNVNASNQLTLYNSVYSEYQS
KSGVNTNEELAALIQQWSSYGAAKIVTTVDQMLDITLLGLKS"
gene 238894..239658
/locus_tag="DMACINML_00505"
CDS 238894..239658
/locus_tag="DMACINML_00505"
/inference="ab initio prediction:Prodigal:2.6"
/inference="similar to AA sequence:RefSeq:CAL35575.1"
/note="hypothetical protein Cj1467"

```

```

/codon_start=1
/transl_table=11
/product="hypothetical protein"
/protein_id="Prokka:DMACINML_00505"
/translation="MKNFIQLKTKLDSLVEKNTNKALFESPDPLQIAKFHNDEFIAL
LCALFAYGNAKNIVNFKKLDLDFSLDLQKQIQKELQNLKYRFQNERDIQEIFLTFSR
LKNEISLHELFFSTAYEKRENTDAILAFLQKIKTLNSYSSYGYDFFFYKGIWQNTPTSP
LKRYNMYLRWVRKDELDLGLFTKIHTKDLLIPLDTHHKISLTLGLLKRKIYDYKSV
LELTRNLKLDANDPIKYDFALYRLGQNKALSCLK"
gene 239662..240426
      /locus_tag="DMACINML_00506"
CDS 239662..240426
     /locus_tag="DMACINML_00506"
     /inference="ab initio prediction:Prodigal:2.6"
     /inference="similar to AA sequence:RefSeq:CAL35576.1"
     /codon_start=1
     /transl_table=11
     /product="putative integral membrane protein"
     /protein_id="Prokka:DMACINML_00506"
     /translation="MGFEHLDTIYFVLFVVALFAGFIDSIVGGGLITLPALIAACGI
PAHLSLATNKLQSVFGSFTATLTYFKSTTLPHLAYGIFFTALGAAIGSYSVLFVKDEH
LKLIIILIFLTLFLYALRPSLGKHESEAKIKNIKFFHLICGLTLGFYDGLPGTGS
FWIFACVMLLGFNMKKASINTKILNFTSNVVALFIFLWQYELLWIVGLLMGVGQILGA
YLGSKLVKTNKFIKTLFLIVGATIIKVAWDYFS"
gene complement(240423..241601)
      /gene="ctsF"
CDS complement(240423..241601)
     /gene="ctsF"
     /locus_tag="DMACINML_00507"
     /inference="ab initio prediction:Prodigal:2.6"
     /inference="similar to AA sequence:RefSeq:AAW36076.1"
     /codon_start=1
     /transl_table=11
     /product="general secretory pathway protein F"
     /protein_id="Prokka:DMACINML_00507"
     /translation="MKLYELEILKDKTKQKKHLRARNLNEAQAKAIKKWEILNIKEM
QKAGFKRLDNEKFILFFQELSLCEVGISIKDALNELNKIYSHKMIAKLCDNLNLGQN
LSLAFENANFGLTHAELALIKTSQNTGKLSSEIFMQISRLRQNNVENEQRVKKALRYPL
IVFLSVCAAFVLLMLFVVPNFKDLFEDLNLTLFPITELIIYIYNFLDKYILLVLCII
VVLFLALFLYRKYYFFSYFCDSLLVKIPLLSKFIIYQQNYSFFMIFSLLLKSGISLLD
AFRLATLALNKKILLCYQEVKTFMDSGLEISYAFKKVDLFDPLVFSMLSVMKSSKL
EFLSEEIAKYKKNKSENMDKFLSFLEPIMTLWVAILVFLALGIFLPIWELSSGVNF
"
gene complement(241588..243150)
      /gene="ctsE"
CDS complement(241588..243150)
     /gene="ctsE"
     /locus_tag="DMACINML_00508"
     /inference="ab initio prediction:Prodigal:2.6"
     /inference="similar to AA sequence:RefSeq:CAL35578.1"
     /codon_start=1
     /transl_table=11

```

```

/product="putative type II protein secretion system E
protein"
/protein_id="Prokka:DMACINML_00508"
/translation="MIERFLFQDYINDKITLEQIYHEHKIDSESLKSLASDENISYS
TLEELDLSLGEKFPSCFLLKFKILPILSKENTLYIASSKPCSLELLDEIRIFYEAKDI
EVLIANEFKIMKFLYKLVKEKLQNLNLSANLRLEWKENKYQNEQSYISQIFDFILDEIL
EFNPSDIHIEARENDALIRFRVDGILREFACLEKDIYEALVFHIKFLSQLNVAESRKA
QDGNFELKIKENRYDFRISLPLQNGESIVIRILKHNEEILDLENLNLGEKNLTILKK
ALYNPYGMILLTGPTGSGKSTSLYACLNELKSIKKIISVEDPIEYKMPVLVQQILLNP
KAGLEFNALRAILRQDPDIIMIGEIRDEESLDIAIKASLTGHLSTLHTNNAISTI
DRLIDMNAKPYLIASALRIIIAQRLVRKLCPKCKQKSTKIYEIKGDFFEAKGCEHCHH
SGYQGRELISECLYIDEEIAQVIREGGYKNKILELAKAKGFQSMFEQGLQKAKEGITS
IDELVRVLNEAL"
gene complement(243143..243739)
/locus_tag="DMACINML_00509"
CDS complement(243143..243739)
/locus_tag="DMACINML_00509"
/inference="ab initio prediction:Prodigal:2.6"
/inference="similar to AA sequence:RefSeq:CAL35579.1"
/codon_start=1
/transl_table=11
/product="putative membrane protein"
/protein_id="Prokka:DMACINML_00509"
/translation="MNIEERVRELEDKYKRYLLKKYFKFLFIFAALVCMVISFFVIQ
NFYKQKALALEAYKKTLNHQIAQAQIANEKNKILQERLSKDENKDELKEELKTQID
IYSKLLNISDLKRNFYQNPSYEKAMNLAARYYENKDYEKSIFWLSLKANDIDRKNSSSW
ILFSKAKQALGKDEEAKQALDITYSYYGLIEFDKEIDD"
gene complement(243736..244332)
/gene="ctsP"
/locus_tag="DMACINML_00510"
CDS complement(243736..244332)
/gene="ctsP"
/locus_tag="DMACINML_00510"
/inference="ab initio prediction:Prodigal:2.6"
/inference="similar to AA sequence:RefSeq:CAL35580.1"
/codon_start=1
/transl_table=11
/product="putative ATP/GTP-binding protein"
/protein_id="Prokka:DMACINML_00510"
/translation="MNNIIAFRQECFNQINALLKNKALILLWGKSGSGKSVLLQRLAL
HHNEDFTNQIFTDEKDFHKFIQDKKRKIIILDEVGMYSPIELIRIYSQMSFVLSS
HKKINLFEKEYFKSRFSAMFWLQKPNINELSSYIKMKFDQELSQKSLKFLMKIYQGNL
RYLDKILQSFCELNAYLNNKNQDYILRLSALEQGFLLK"
gene complement(244325..245743)
/gene="ctsD"
/locus_tag="DMACINML_00511"
CDS complement(244325..245743)
/gene="ctsD"
/locus_tag="DMACINML_00511"
/inference="ab initio prediction:Prodigal:2.6"
/inference="similar to AA sequence:RefSeq:CAL35581.1"
/codon_start=1
/transl_table=11
/product="putative type II protein secretion system D

```

```

protein"
/protein_id="Prokka:DMACINML_00511"
/translation="MIRLIFIKFLFFTNLIIYAIECQKRLFDISINEDLSIEESLRELA
SYCSFSVVKDTIAKEKLVQSSINIHQMSLDEIFKLFIEEQDLAYKFDGKVLKISA
LQTKIFKINYITSVREGQSITKASVDSKPRQSEYYSAFEDNEDNMIKSMEKFDWQNI
EKEIMILLSSSHENYDIKAPIVNPAGLVIVTGTHSQLQRVKAYLQKLESRLKKQVII
DVSILAVNLNKNHSSGINWQNFNIGLNSQTSNTNSFMQIQNGQGFVKNLGLRANLNF
DSIVNFLSQSGKTSVLSNPKLMALNNQQAIIISIGDTVNYQVKESKGTENGTTVSESY
SNYSIFIGILLNILPEISDDGKI MLRINPSLSDFKYPEDNKRQKEPRTIAPDTIQKLL
SSVQVENNQTLILGGLISHNRSQNNNSVNFSLKIPILGSLFRSEDENSNITEIVFII
TPSIVDNTHIPSLRELGFKYNE"
gene      complement(245721..246017)
          /locus_tag="DMACINML_00512"
CDS      complement(245721..246017)
          /locus_tag="DMACINML_00512"
          /inference="ab initio prediction:Prodigal:2.6"
          /inference="similar to AA sequence:RefSeq:CAL35582.1"
          /note="hypothetical protein Cj1475c"
          /codon_start=1
          /transl_table=11
          /product="hypothetical protein"
          /protein_id="Prokka:DMACINML_00512"
          /translation="MLSYEDFEEYFKILNTKQSVELGNFQNPFFNPTFEKIKEIKITA
IMLDRAKINNKWYKKGDKIGEAVITDITTKEIILRYDTLDFKIAFKNNDKINIY"
gene      complement(246056..249616)
          /locus_tag="DMACINML_00513"
CDS      complement(246056..249616)
          /locus_tag="DMACINML_00513"
          /inference="ab initio prediction:Prodigal:2.6"
          /inference="similar to AA sequence:RefSeq:CAL35583.1"
          /codon_start=1
          /transl_table=11
          /product="pyruvate-flavodoxin oxidoreductase"
          /protein_id="Prokka:DMACINML_00513"
          /translation="MGKIMKTMGDNEAAAYAAYAFTEVAGIYPITPSSPMADYTMWA
AAGKKNLFGVPVKIVEMQSEAGAAGTVHGSLQTGALTTTYTASQGLLLKIPNMYKIAG
QLLPCVIHVAARSLAAQALSIFGDHQDIYAARQIGFAMLCSSHSVQETMDLAGVAHLCA
IKGRVPFLHFDFGFRSHEIQKVEVMDYAHFDRLLDRKALLEFRNSALNPENPKTRGT
AQNDDIYFQTREVS NRFDALPDVVNEYMQEISKITGREYKPFYTYGHKEPERIVIAM
GSVTQTLEEVVDHLNSKGEKVGIVKVYL RPFSLKYFFDVMPSVKKIAVLDRTKEPG
SLGEPLYLDIKSAFYGKENAPVIVGGRYGLSSKDVDP AQMIAVFENLKLDPKDGFTV
GIIDDVTHTSLQTGEKISLGDESAIECLFYGLGADGTVGANKNSIKIIGDKTDFYAQA
YFAYDSKKS GGYTRSHLRFSKKPIRSTYL VSTPHFIACSVAAAYLEIYDVLAGIRKGGT
FLLNSIWNAEETIRQLPDAVKKTLAEKEVNFYIINATKLARDIGLGNRTNTIMQSAFF
KLAKIIPYEDAQKYMKELAYKSYSKKGDAIVEMNYKAIDVGADGLVKVEVDPSWKNLE
IKEKEQTNAYKGFTEFVEKIVKPMNAAKGDEL PVSTFLGYEDGSFEHGTT EYEKRGVGV
MVPRIEANC IQCNQCASVCPHAVIRPFLINDEEMAKAPRGVKDHAL EAKGTKGEKLS
FKIQVSPLDCTGCELCVHECPTKEKSLVMVPLQEEMDFGEQENADYLFKEITYKDDIL
NKESTKGAQFAQPLFEFHGACPGCGETPYITLITR LFGERMIIANATGCSSIYGG SAP
STPYRKS VKNGHGP AWGNSLFEDNAEFGLGMKIATENTRYRIENIMNENMQKVPNALA
ALFKEWIANKDKGAESVEIKDKMIPILEQNTDIKAVQDILNLKHF LSKKSHWIFGGDG
WAYDIGYGGLDHVLASGENVNILVLDTEVYSNTGGQSSKSSRTGAVAQFAAAGKPIQK
KDLGQIAMTYGYIFVAQVNSTANYSHLIKAIMAAEAYDGP SLIICYSPCIAHGKGG L
GYSGEQGELATKCGYWPLYTFDPRL EEQGNPLTMVGKEPDWDLYESFLMNEVRYNSL

```



KKSNEHAKELFERNKKDAQRRYRQLKRIAMADFSNEVES"  
 gene complement(249719..250357)  
 /locus\_tag="DMACINML\_00514"  
 CDS complement(249719..250357)  
 /locus\_tag="DMACINML\_00514"  
 /inference="ab initio prediction:Prodigal:2.6"  
 /inference="similar to AA sequence:RefSeq:CAL35584.1"  
 /codon\_start=1  
 /transl\_table=11  
 /product="putative hydrolase"  
 /protein\_id="Prokka:DMACINML\_00514"  
 /translation="MKKTILFDLDGTLIDSTDAILNSFQGAFKILGLTPKNNEEIKNL  
 IGHPLEHMFKFLYQDKANLSQEFVLAYREIYSQIYLEQTLLPKAKEALELAFEIGDL  
 GIVTTKGGKFTPLLEHLGVKKFFKTLITLEDVTNPKPHAEPILLALEKMQKTKENAY  
 MIGDTILDIQAAKAANITPLALSCGYGDEDELKRYSKVFSSAYKSVLYIKNN"  
 gene complement(250357..251355)  
 /locus\_tag="DMACINML\_00515"  
 CDS complement(250357..251355)  
 /locus\_tag="DMACINML\_00515"  
 /inference="ab initio prediction:Prodigal:2.6"  
 /inference="similar to AA sequence:RefSeq:AGQ94609.1"  
 /codon\_start=1  
 /transl\_table=11  
 /product="outer membrane fibronectin-binding protein"  
 /protein\_id="Prokka:DMACINML\_00515"  
 /translation="MRKLLLCLGLASVLFADNNVKFEITPTLNYYFEGNLDMDNRY  
 APGIRLGYHFDDFWLDQLELGLHYSDVKYTNSTLTDDITRITYLSAIKGIDLGEKFYF  
 YGLAGGGYEDFSHGAFDNKSGGFHYGAGLKFRLSDSLALRLETRDQISFHDADHSWV  
 STLGVSFQFQAKQEKVVVEQTKVSKPQVTPAPAPVVSQSKCPAEPREGALLDENG  
 CEKTIYLEGHFDFDKVINPAFEEKIKEIAKILDENVRYDTILEGHTDNTGSRSYNQK  
 LSERRAESVAKELEKFGVDKSRIQTVGYGQDKPRSSNDTKEGRADNRRVEAKFILN"  
 gene complement(251477..251866)  
 /gene="rpsI"  
 /locus\_tag="DMACINML\_00516"  
 CDS complement(251477..251866)  
 /gene="rpsI"  
 /locus\_tag="DMACINML\_00516"  
 /inference="ab initio prediction:Prodigal:2.6"  
 /inference="similar to AA sequence:RefSeq:CAL35586.1"  
 /codon\_start=1  
 /transl\_table=11  
 /product="30S ribosomal protein S9"  
 /protein\_id="Prokka:DMACINML\_00516"  
 /translation="MATTYATGKRKTAIAKVWVKPGSGKISVNGIDLNTWLGHEAIK  
 LKVQPLLVTQKQETSMDIKATTLGGGYSAQAEALRHGISRALAAMDADFRALLKPKGL  
 LTRDSRTVERKKYGRRKARRSPQFSKR"  
 gene complement(251869..252294)  
 /gene="rplM"  
 /locus\_tag="DMACINML\_00517"  
 CDS complement(251869..252294)  
 /gene="rplM"  
 /locus\_tag="DMACINML\_00517"  
 /inference="ab initio prediction:Prodigal:2.6"  
 /inference="similar to AA sequence:RefSeq:EAQ72516.2"

```

/codon_start=1
/transl_table=11
/product="ribosomal protein L13"
/protein_id="Prokka:DMACINML_00517"
/translation="MTKITKPNEVKREWIVLDAEGKRFGRLLTEVATILRGKNKPCFT
PNVDCGDYVIIINASKAVFTGANKAEDKLYHRHSGYFGSVKSEKFGDLLEKNPAKLYK
LAVRGMLPKTNLGRAMLKKLKIYAGSEHPHTAQIAKEGK"
gene complement(252587..252850)
/locus_tag="DMACINML_00518"
CDS complement(252587..252850)
/locus_tag="DMACINML_00518"
/inference="ab initio prediction:Prodigal:2.6"
/codon_start=1
/transl_table=11
/product="hypothetical protein"
/protein_id="Prokka:DMACINML_00518"
/translation="MQKTGQIFTQYGLKTEEFITYGVFDDLLFTFEHYLEEDNDCISF
SVSFRVKSMSKDEILCKIIGLDQPNLDFKILNQYGVRSFPFSL"
gene complement(252963..253094)
/locus_tag="DMACINML_00519"
CDS complement(252963..253094)
/locus_tag="DMACINML_00519"
/inference="ab initio prediction:Prodigal:2.6"
/inference="similar to AA sequence:RefSeq:CKG87616.1"
/note="Domain of uncharacterised function (DUF1910)"
/codon_start=1
/transl_table=11
/product="hypothetical protein"
/protein_id="Prokka:DMACINML_00519"
/translation="MKKHTRLRDPLDWDLEGAIVKLMNLDKEEFKSYKYFPYDLI"

```

ORIGIN

```

1 aggaatgata aaaataccca cgctacacac aaaccaagca atttgccac ttgatatt
61 gtctattcct ttgctttcta gttttgcttt gagtttagaa taaataggaa tttgcaaatt
121 tactccttag tttaaaaggt aatatatatt aagtatcact caatgttttt tatctttttg
181 cttttattta acccatatac aaacccttgc tagatgatag tgactagttt acttgcaaaa
241 tagcatcaca tccattctaa aacttgggca agctctttgg ctacaaagca tttaaagtct
301 acatcttcta aaggtttaga tggaatgata gcatttttaa atttttgcat tttggcttct
361 tttaaacgag tatcaagact aaaaacttct cttatttctc catttaaact caattcccct
421 ataaaaacac aatccttact caaaggacga tttttaaaac tagaaataat agccgcaacc
481 acagccaat cagccgcagt ttcattcact ctactccac cgctaatatt tataaagaca
541 tcataatgcc caagtggaat ttctaatttt ctttcaagta aagctaaaag catgtcaagg
601 cgattttttt catagcctgt ggcactgcgt ttaggataag aactctcgca aactaaagct
661 tgcacttcta aaaccaaaagc acgagaacc tccattacaa cacctaaagc actgcctgaa
721 gtagccttac ctgcgtaaa aaaacgattg gctaaatctt ttgactgat caaaccttta
781 ggagtcattt caaaaattcc cacctcactt gtgccgcaa agcgattttt aaaaccctt
841 aaaagtctaa tttcttttagt tgcattccc tcaaaaataa gcaccacatc aaccatatgt
901 tctaaaactc tagggcctgc tatggctcct tctttggtaa tatgccctat tataaaagtg
961 ctgatattat aagttttgct tactcgcata agttcaaaaag tgatctcacg cacttgagtg
1021 atacttccag ccgctgaagc aattttggtt gaataataag tttgtatgga atcaataatc
1081 agaatttcat aatctttctt atgcaattct tccaaaatat tttcaagaca aagttctgta
1141 agtaaaaata aattaggagt attagcctca agtcgatccg ctcttaattt gatttgcgct
1201 ttgctttctt ctccgcttac ataaagaact tttttatatt ttttagccaa attagaagca
1261 atcttttagc aaagtgtaga tttacctact ccaggactac cacctatgag caccaaagaa
1321 ccctcaaaa gccctccgcc taaaacaaa tccagctcat catcatcagt actacatctt

```

1381 gaaaaatgct caagttctac atcttctata cagatagcct cgcttgccct tgtgcttgct  
1441 tgtgcgatth cttttaaaac ttttaattgt tcagatthta attctataaa actatcccaa  
1501 gaaccacact caggacatth tccaagccat ttgctthtgct gattthccgca agctthggcat  
1561 tcaaaaagaa ttttaththt agccatgata cttctthtaa gaataththt tgcaataath  
1621 tttcacatta taaccaaath taaatthaaa ttttaacaaaa agtcaaataa aattaagtht  
1681 tatatgatta taatthaaata aaataaaaaa ggctagagca tgcaaaaath actaaaagtc  
1741 gccctaathc aaththgctcc aaaatctthc gagththcaa acaatctcga taaagcctta  
1801 aagctthgccc atctthgcat ggagcaaggt gctaagctga tagththtacc tgaactthac  
1861 gatagtgctt attgtgtaga agatcaagat gaaaaattht gctthaaath acatcaagca  
1921 catcctaathc ttgatgcat acaaaaatth gctaaaaact atcaagctta tatcgtagca  
1981 tgctctatag aaaaagatac ccaacttht gatagtgctt acatcattag tcacaaaggt  
2041 cththtaggtg thtatagaaa aaththtctt tggggtaath aaaaagaaag atthtgcaaga  
2101 ggagacaaath atcctaththt tgaactagaa thtgaaaath thaaactcaa attaggthtg  
2161 caaaththgtt atgaaathg cththtagcaa ggatctagat ththtagcact tcaaggagct  
2221 gaaathcttht gththctthc agctththgg aaggcaagga cththgthtg ggaththtagca  
2281 agtagggcta gagctthtaga aathggthgt ththgctthg ctgctaaccg atctggaagt  
2341 gaaaththcta agataaataa tgaaacttht acctthgctg gaaathcaaa aaththtcaat  
2401 cthaaaggag aathththaa agaaatccta gaagaagaag gththtcat agctgaaact  
2461 gatctthgag aagthcaath tcaaagaaaa aaththacct atctthaaaga ththaaatctc  
2521 aaththaaathc aagaathath aacaathctc atctthaaata caaggagta aaththggcaa  
2581 aagaathctt agthgcttht ggctggata thgatgctgg agcaggatgg ctaggaagct  
2641 atggaggtga ggathctcct gatgatath caagaggtct ththgctggg gaagthggta  
2701 thcttaggct ththaaathc ththaaaaat athaththc tgcaactthg ththgctccag  
2761 gacathctcath agaaathctt cthgaacaaa tgaaathgat agthggatgca ggacathgaaa  
2821 taggtgcca thgatathca cathgaaathc ctaththgcaat gagthgctaaa caagaagaag  
2881 atgththtact thaaagthata gaactthtag aaaaaathcag cggaaaaaaa ccaagthggat  
2941 atgthgacc thggthggaa ththcaatha thcaathg gctctthgct aaacacggca  
3001 thaaathcga cathcttht atgcathatg actthcacacc thaththgth cgtgthggag  
3061 acaathggac thaaathgath thtagthaaag atgcaaaaga atggathgag cththggthc  
3121 gcggacaaga aacagaththg athgaaathc thgcaaththg thaththtagac gatctthctc  
3181 ctathgathgt thataaaaaa thctcaatha gctthggtht thththccca agagathatag  
3241 thcaaththg thathgathcag ththgathggg ththathgaga aathggathth gctathththc  
3301 ctathgactath acathctgath gthathgctha gactthcagth ththactcath cathgaaagaa  
3361 thaththgaca ththcaacaaa cthgaggtg thaaathggg aaththaaac gaththggcg  
3421 atgathththc aathcathctt ccaagaaaaa aathaaathc caaggcttht agcctthgthg  
3481 athcaaaagg athaaathgt gathththath thggcaathg athagthctt thgathggag  
3541 cgagththaa ththaaagaag aaaaacacga actthgthg gthgagaac aaaaagaaag  
3601 aththaaata aggctthaaa aathcaaaath ththaaathgaa athththgath ththathgath  
3661 aathctthaa gaathggcaaa athcaaaata cathathagc aathaaaaag thctcgathat  
3721 thctgththath gaththaggc aththathgath thaaathgath gagctthgaaa aathathcath  
3781 cgathgththg athgaaathc thctthcath ththaaagath aathathggct aathathccc  
3841 thcathgthgt thaccgththt ththgagathg gaaaaacac cthththaaa gaathaththaa  
3901 gcaathcaac cthgathgath athgctththg thathcaacga actagthgag gththctthg  
3961 athcathaaath thatacaaaath gathththath aggaacaaac ththaththth aathgathgth  
4021 thgctthgctg caathaaaaga gaathththg aathgaaath thaaathgath cthgacathth  
4081 thgaaaacaa gggthaaaaga cthcaagath ththaththgaa aathctagthc ththgaaathc  
4141 ctgacathct cathththcath ththcaagcth atgthththt agcthaacath ththgaththg  
4201 ccaathathth caththgathgath gathgctththg aagthctthaa thcaththcaaa aathgagaag  
4261 cthgcaathca agthathagc ththgaththt thathctthc aathaaagath cththathcca  
4321 athcccaathc cththagthgaa aagathaaac cththaththc caathathcaaa athcathagca  
4381 aagaaththt thaththcath athgctththc gccathcaaa aathcaaaaa gaaththaaa  
4441 athathgaaath aathagthcath aagathgath thagthctthath aathctthath ththgathag  
4501 ctathaaathg gaathaththt agcaththggc ththgathgct ththgathgaa cagthgathca  
4561 aaththcthaag agthaaagga cththathcaaa cagaathathc thathcthaac aathathathg

4621 gagtaggaca tctgatttat catcctacgc atactaaaat ttcgagccta aaccatcctt  
4681 cgcagttagt atttatagca aaaaatttaa aattagacaa gattaaagaa tccttagaaa  
4741 attttttaaa actcgagcaa ttaaattaat caaaaacacc ctctaagagt gtgtctaaga  
4801 aattttgtgc attaaattct atcaaatctt gcattttttc acccaccctt atatacaaaa  
4861 taggaagttc taattcacgc gctatactaa aaagtgtcc accctttgct gtgccatcaa  
4921 gtttagtaat aataactcca tcaagctgaa caagctcatt aaaagcttta gcttgtaaaa  
4981 tgccggcatt accttgagtg ccatcaagta ctaaaatfff tctatgtggg gcattaggca  
5041 tagcttttagc tgaaattcta acgatttttt ctagtctgtt ggctaaatff ttttgatttt  
5101 gcaaacgacc cgctgtgtca atgataacc tatcaaaatc cttagctcta gccttgctaa  
5161 tagtatcaaa agcgactgcc gaagggtcgt gaccttgttg agttaaaact atatccacc  
5221 ctactttttc agaccaaaagc ctttaattgtt ctatcgcccc tgccctaaaa gtatcacaag  
5281 cacctaaaat cactttttga ccttggcttt tgtataaatt agcaagctta gctatgcttg  
5341 tggttttgcc tgcaccattt actcctaaaa taagttctac aaagggtttt tcatctagga  
5401 attctttatt ttcataaaga aaataagaac ccattacacg ctttaaactt tctttcttaa  
5461 cctcatcact aggtggcaaa taataaataa tttcttctac aatctcatat gctacatctg  
5521 cttcaagtaa aatctctctt agtaaactctt tggtaatfff tttatfffca ctttaacac  
5581 ccactatact ttcaagtgtt tttgcaagtc cttttttaaa aaaattaaac attaaagtat  
5641 cgccttttgt atatcaatff ccaacatttc ttctggaatc aatcctagat attgggttgac  
5701 aagctgggaa tttttatcat ataaaaacat agtaggaatt ccatttacc cgcctaaaat  
5761 tttagccaaa agataattat tttcaccatt ggctatffta tataaaatff gattttcttc  
5821 aacaaaagcc ttaagctcct catcactctt atcttcaagt aaaacgccta ctatattaaa  
5881 ctgctcttca tatttttctt gaagcttgtt aagatgagga atffctgcaa tgcaaggaga  
5941 gcaccaagtg gtaaaaaaca caaataaagt cgccttatct ccacggcaa aatffaaatt  
6001 ttcattgtct ttttttaca aaactgaatt tccgtctatt aaattgagat taaatctcaa  
6061 gctatcactt tggcttaagc ttgattgaac gcttgcattc atatcactff gatctttttc  
6121 tttatcatta ctacatgcaa caaaaaact caagagtata gctagtgtaa atactttttt  
6181 aatfftcatt ctatattff cttgtatctt tgtaaaaaat gttaaaatta tatcatagtt  
6241 aagataataa tttttaaaaa ggcacacgat gcaaaaaaca tctfftagga ctctgcaaaa  
6301 aaaccgctc gcacaacaca aaaaacttaa atffaaacaa gattffatag tatttaagga  
6361 atgtfftaac ttgattaaaa aaacaaaagc aaaaaatatt cttatffttt tctcttggg  
6421 gtatgagcca aatffactca aatfftagaca tattfftagt aaaaatcata aactffttgt  
6481 cccatffatg caagataaaa gtttaaaaaat tgtaaaaatta agattacctt ttgttaaaaa  
6541 aaggffttggg gtattagaac ccatggactc cttfftgaaa actaaaattg atatagctat  
6601 cattccggtt ataggagtag atagagagtt aaaaagaata ggacatgggc aaggtffttt  
6661 tgatagattt tttgaaaatt taaactataa acctcttgta atffttactc aaagtatcaa  
6721 tgctataagt gaaaaaaaat taaccacaaga gcatgatatt gcgggtgaat tttatatcaa  
6781 cccttataaa aatattaca agaaagacaa caaatatgat agaactactt atcgcactta  
6841 taaccgctat agtcggtctt ggaataggat atfftagttgc aaaaaaatc aatgatgcca  
6901 aatatgaaat ttttgtcgag caagcaaaag cgaaggcaaa agccatagaa tatgaagctg  
6961 aatgattff aaaagatgcc aaaaattcaa tccttaatgc cgaactcgaa gtgaaaaaaa  
7021 aatatgagga taaaactcac aaaattcaaa aagaattcaa tcaaaaattc gatgaattat  
7081 ccaaaaaaga acaaaaactt caacttcaag aagaaagctt aaaagagaat caagaagaat  
7141 tactacgctc caaaaaacaa atgcttgatt tacaatcaga tgctgacaaa ctcaaaaatc  
7201 aataccaagc aaaactcaat gatgtfftaa atatfftaga acattcagca gggctcactc  
7261 aagatgaagc aaaaaatatt attcttgaaa aagtagaaga aaactcacgc aatgaaattg  
7321 cccatattgt taggagatac gaggaggaag ctagaaatga ggctaaaaga agggcaaat  
7381 atatcatagc acaagcaacc tctcgtfftt caggagaatt cgctgctgaa agacttatta  
7441 atgttgtcaa tatcaaaaac gatgagttaa aaggcgcat tataggcaaa gaaggacgca  
7501 atgttaaac tttagaaatg gttfftaggag tagatattat cattgatgat acacctggag  
7561 ctattatagt aagttgfftt aatctffatc gccgtgctat tgctactaaa gtgattgaac  
7621 ttttggtaga agatggaaga attcaacctg cgcgcataga agaaattcat gaaaaagtat  
7681 gtaaagaatt tgataatgct atfffftagaag aaggtgaaac tatactgatg gacctaggac  
7741 tttctaaggt ccaccagaa atcactaaac ttataggaag gcttaaatat cgcgcaagct  
7801 atggacaaaa tgctfftagca cactctffag aagtagctca tfftagcagga atcatcgctg

7861 ctgagtgtgg aggggatgaa aatntagcac gacgcgcggg aattttacac gatataggca  
7921 aggctttaac acatgatttt gaaggctctc atgtggattt gggagcagag ctttgcaaac  
7981 gctataaaga gcatcctgtg gttatcaatg ctatztatgc tcaccatgga cacgaagaag  
8041 ctacaagtat agaatcagca gctgtttgcg cagccgatac gctcagcgct gcaagaccgg  
8101 gtgctagacg cgaagtttta gaagctttct taaaaagagt aagcgaactt gaagaaattg  
8161 ccaaaagcaa agagggtatt aaaaacgctt atgcgattaa tgcaggaaga gaaattcgtg  
8221 tcattgcaaa tgcaaaactt gtaaattgat atgaaagcgt gcttttagcc aaagaaatag  
8281 ccgctgaaat tcaagaaaaa atgcaatatc ctggagaaat caaggtaa at gtcatacgcg  
8341 aactaagagc catagaatac gctaaataag ggatcagtat gcaagatatg atagatacct  
8401 tattaanaata tggttatata gttttatfff tctattcttt aggtgggtgga atggtaggta  
8461 ttttggctgc tggagtttta agttctcaag gaaaaatgga cttacttta tgtataagca  
8521 tagcttttgt agccaatacc ctaggatcca cttactttt tatacttgga aaatactata  
8581 aaaaagatat tatgccttat tttaaaaatc atcgccgaaa acttgccctt gctatgatga  
8641 aaaccaaaaa acatggagtc gttttgctta taactcaaaa atttgtctat ggcttaaaaa  
8701 cttttatccc catagctgca ggtatagcaa aatatcaatt tattaatfff tcatcatca  
8761 atactcttgc tagcttgctt tgggcagtac ttttaggata tagcgttat gcttttggtt  
8821 ttgttataga agcaatffff aacaaattaa gctcttatcc ttatatcgca cttttatfff  
8881 taatcgtatt ggttggaaat atttggtttt atttggctaa attttctaag aaataatgtc  
8941 tttttggaat tctttatatt taaaccttaa agaattccgc tattttattc tatttggcct  
9001 tatcgttttt atttttaata ttttttaga atacaatcat tttttaacc tcaagaaaa  
9061 gaaacattat ctagtagaaa atgccttgct tttacattat tatccaaaat acaataaaaa  
9121 taataaaaaa tactggggtt taaaacttaa aacaaaggat tttatccttt atagtacaag  
9181 ttttaaggat ttaaatttga gtaaaaaatca gcttttaaat ttaaaaaataa ttacaaacaa  
9241 tttttctttt agggattatc ttagaaaaag cttttatgct cctagctacg gttttgaagc  
9301 atcaggatat tttaaaaata atgttatcat ttcttatttt ttaaaccaac atacaaatga  
9361 aaaaatacaa gaatffffat gagctttatt ttttgctttg cccatctctt cggagcttag  
9421 aaaagatggt aattattatg gtgttgctca tttaatagca atcagtggtt atcatatagg  
9481 tttgcttttt gctttgggtg tttttatact cacgcccttg tatagtttct ttcaaaaaag  
9541 atatttcctt tatagaagct tacgctttga tttaaagtgt tttatffffa tcttgctttt  
9601 tgcctatgct tatcttatag gttttgtgcc ttcttatatt cgctctttaa tcatggctct  
9661 ttgggggttt tatctacttt gtaaaaaat aaaaattcta agctttttta cctctttat  
9721 aagcatatat ctttgatag ctctttatcc taggctttta ttgagcgtgg gatttttatt  
9781 ttctgttttg ggagtttttt atatfffftt gtatftacac ctttttcaa aattctttca  
9841 taatttctta aatattgttt tactgaacat atggacattt ttttgatga ttatccctgt  
9901 gctttatfff tttcctctta ttagctatca acaattctta gctattattt tgagcggaa  
9961 ttttatagtc ttttatcctt tggttttatg tttgcatttt atagcacatg ggaatctttt  
10021 agatacggta ttgattgatt tttttaatat taaatfffft gctatagata ttaaaattcc  
10081 aacttggaat ttaatatctt atcttacact ctcttttata gctatgcgtt ataaaatttt  
10141 agcccttctt tgtgtttttg cgaatfffft cccctttatc atgattatga tttaaaaaat  
10201 aataaatttt aatcccaaaa agataaacia tccaagaaat ataaatcaa ataaagaaaa  
10261 aaagtatagt agaaaaagaa ccataaacac tggcataggt tttattataa actatataat  
10321 acacaaataa atcttttctt atataccaaa tagctcccgc tgcaaggaa actagtatca  
10381 aactcttaag agtaccttta tgaatagaac ttgaataaga tataaaaaac aaaccccaaa  
10441 taatcacaaa aggcaaaatt tcaaaaaaat taaaacctat tttataatca tctaaagctt  
10501 gctgaatcaa acccgatata taaaaactaa gtcctaagcc tagtgggaca agagttaaaa  
10561 gcgctccagta agaactgatg ctttgccaaa gtccttttgg ctcatftttt gtaatgcgat  
10621 tgattacaaa atcgtagcct gaaaaaaaag ctaaagaagt aaaagtcatc gctataaggc  
10681 ccactatacc caaatttaca ctattgttta aaaatgtgtc aagataagca gcaactatat  
10741 cttgttgtgc aggtatnaaa aaagcaaaaa tgatttgttt ggctttttca taataaacct  
10801 taaagcttga aatttgcgta aaaacagaaa aacacacaaa caaatcggt attaaagata  
10861 aatagatata aaaactaagt gctgcggcat aatftaaaa tttttatcc cgcaaattag  
10921 acaaaatagc aaaaattctc ttcaatcttt tcctttttaa agtcccattt taaaaggatt  
10981 aagaatatta tttggatcaa aggcfttttt aatatttctc atcaaatca tttcagcatc  
11041 agaaaaagct aatttcataa aaggagcctt agaaagccct attccatggt caccacttaa

11101 ggttcctcca agctccacag taagtttaaa tactttcttct actgcctcat aacctttttt  
11161 cacctgttct tcatcatttt tatcaggaac cataacatta gtatgcacat ttccatcgcc  
11221 agtatgacca aaacaagga ttttaaaacc atatttttta gaaatttcat ctatgccttc  
11281 aagcaaagca ggaagttttg atcgcggcac agtaatatcc tcatttaatt ttaaagtccc  
11341 atacatagct atacctttgag agcaatttct tctagcaaac caaatatctg ctgcctcttg  
11401 ttcattcttta gctattttta attgacttgc tcctgcttct aaaaaatgct ctccataaat  
11461 ttttaaatct tcatcaatag cttctttttac attgccatct acatcagcaa tcaaaatagc  
11521 ccctgcatcc acaggcaaac ctttgttaaa tttactttct accgctctaa tgctaagatt  
11581 atctaaaaat tccatagata caggattaac cccacttgca agactcttat aaactgcatt  
11641 catagcactt tttacacttg gaaaaattcc aaaagctgtt ttcttaaat taggcaaagc  
11701 gataagtttt aaagtaagct cacttaaac cgctaaagaa ccctcactcg cgattaaaat  
11761 acctgcaaga ttataccctg caacatcttt gatggtacgc ttaccgcac gaataatttc  
11821 tccattgggt aaaacagccc ttaaagccat aacataatct ttagtaatgc catactttgc  
11881 agctctcata cctccagcat tttcgtttac attgccccct aagctagaat actccatact  
11941 agcaggatca ggcggataaa aaagcccatg tttggccact tctctttgta aatgtatatt  
12001 aatcacacct ggttgacta ctgcgactaa attttcaaga tcgatttcta aaattttatt  
12061 catatgcttt tcaaaactta aatcaatcc cccattgaca gccaaagcac ccctgtaaa  
12121 acccgaacct gctccgcgag gaatgatgat aatattattt tcattgcaaa attttaatat  
12181 ttgagaaata tcctcttctg ttcttgaaa aagtactcca tcgggcaaat aatgcttttt  
12241 tgtagcatca taactataag cacgcttatg aatatcatca aataggcat tttcactgcc  
12301 tagaagtttt ataaaatatt gttcaaattc ttttttctt gatctacctt agaatattaa  
12361 ttaaagcatc ataatatcta taataattac ccacttcttg agaattaaaa tcaaaaaaat  
12421 tacttttata gccacctata cgagaataaa aaggaacttg tatactactt ggcttaggta  
12481 tagctaattc ataaagctca ctaaaatctt gacaatcaac tatctttgcc ttatcctcta  
12541 aagcaaaaat caaaattccc acagcattgt ctgcgcaaaa ttttctaaaa tctactagct  
12601 ttggagcaag agatgaagag cggatgagtt gtgctcctaa gatatacaata tgggtaaaat  
12661 aaatctctgg aaagctagat acaagttcat tataagtttg ttcattctgga gcgatcacca  
12721 agcctctatc ataaagaaaa tttaaaacca cctcatcacc cttttgcggc acaacattgg  
12781 gtaatggtaa ggcattctgt tcaagatcgg caaaaacact gaattttaat tttgccaac  
12841 ctttttcttt agctataaca cttagctcttg ctataatgct ttttgaagtt tgaaaacgct  
12901 gtataacaac tccgcttgag ttttaattta tatcaggact atcttcaata taaccataaa  
12961 tgtcttcaac cttcaaaagt tccattttta caggctttta atttaaatct actgcaaaaa  
13021 gactgatgct taagcttaaa ataaatgcta gaaatttaag caaactaact ctttaaaaaa  
13081 tcaatttaat gtattataat cttttttgt taagcaattg taagaattat aaagtaaaat  
13141 atagcttttg aaaatthaa aatcctcgaa aaaataaggt ctttatatga aaaaactctt  
13201 actcttattt acatthgta ttcaaagttt tgctgctgctt agtggtgagg agcttacttg  
13261 ggataatggc gatactttac ttaaattctt acaaagaaat tctatcccta tatctcttta  
13321 ttatgggctt gatagagaag atcaagaact tgcttctgat atagcctata aagtaaaata  
13381 ccaagtttta aaagatgaaa ataacaatat agaacaagtt ttgattcaa tcagtgatga  
13441 tttacaaatt catatttata aagataaaaa caatcaatac acccttacct ttactcctgt  
13501 ttcttatcag aaagaagata gaatthtaca tttacaatc gaaagttcag cctatcaaga  
13561 tgthtatgaa gaaagtggta gtagtacttt agctcgtgct atggtgcgct cttttcgagg  
13621 aagtgttaac tttcgcaata tcaaaaagg cgatgaagtt accctttatt acgagcaaaa  
13681 aagacgcatg ggaagacttt ggggagatat cgctgtaaga atggctacgg tagaaattaa  
13741 taaaaatgct caagaagtat ttgcttttaa tgatattttt tacgatcgtg acggaaaaga  
13801 agtggaggct tttttattaa ctaagcctgt aaattacaca agaatatcat caacttttag  
13861 caccgcaaga tatcatccta tactcaaacg ctaccgtgcg caccttggtg tagactatgc  
13921 agcacctact ggaacacctg taaaaagtgc aggcaaagga acgatcacct ttgtaggaac  
13981 taaaggagga tatggaaatg tcatacaagt aaagcatgat tcaggctata tgactttata  
14041 tgctcattta agtcgttttg caaaaattaa aaaaggtcaa aaagtaaatc aaggtcaact  
14101 cattggctat gtaggatcaa cgggtatgag tacaggtcct cttttgcatt ttggtgttta  
14161 tctaaacaac aaagccatca atcctgcttc agtggttaaa attgctaaat cagagctaag  
14221 tggtaaagcc aaggaagaat ttaaaaacac catagtaaaa tataaaggaa ttgtaaacga  
14281 agcttttagct gctaataagc caaatcctcc taaagaagaa gattttgaaa attatataga

14341 attttaagga ttgctaagca aagccttatac ttttagcttca atcaaggaat taagaagaat  
14401 tataagccct tctcttttccat tgcttttccat ctcttttaaat tcagcattaa caagctgatt  
14461 tactaaagct tcattaagta aatccgcatac cccaaactct ctagcttttt gaatgatttt  
14521 taatactctt aaatcctttt tttcatacat tcttaaccct ttaaataaac aacgctcaca  
14581 aagcgttttg aagtcttatc acgacgataa gaataaaacg ttttatcatc aaaactacaa  
14641 atattactat ctacgatatt ttttaatacct aaattttgag cctgaaattht tactaaagct  
14701 ttttaaatcaa gtcttctttc atataaaaaa tcttttaatt ctacttttgc aaattctaaa  
14761 atttctccgt ctatttcata gtttttagca caaatactag gcaggataaa aagatgaaat  
14821 ttttgcatat ctaaatttgg attttttgta taaattttat ccacacactc ttttaaaata  
14881 ttttcaaac tcccttttct tcctgaatga agcgctgcta taacgccact tcatgccat  
14941 aaaatcaaag gcaagcaatc cgcacttaaa acacaaagtg cggatthttt ctctatgctt  
15001 atcaaaccat cacaacttaa attttctaaa ctttcatcat aaatthcaac tttactggaa  
15061 tgaatthgat ccataaaaac acatthtttca atatacctaa aacctagatg agaaaataaa  
15121 ttttctttat gaactthtagc tctaaggata ttatagtctt tatcataagc gcaaaaaaca  
15181 ctgactthttt gattatctag taaagataag taattctctc cacttcttcc catgataatc  
15241 ctttattthtt atctthgcat tgtgcataaa tataacgagc aagcaaatcg ctttctatat  
15301 tgattthctcg gcctattthta tactctthta aaagtthttc cttaaaagta ataggataaa  
15361 tggthaatct aacgccatth tctacaatth cattaatagt aagactaact ccatctatac  
15421 ctatactgcc ttttctthgcc ataaatthca ttgcttctth aggthaagctt atataaaaat  
15481 caatthcatt thcatctthtt tcaatctthtt caagctthcc gataaaatcg atatgtcctt  
15541 gcatcaaatg tccatctatt ctatctccat accthaaagc aggtthctata tgcactthtat  
15601 cttthaaatt thgtactgct atgtgctthac gactctcgtg tgaaagthcg agthcaaac  
15661 catcgctatg aagthtagtc acgctcaaac aagctccatt aacagctaca ctatcgccca  
15721 aatthaggcg ataatthgcc tthaaatthca aaacattatt thgataagat thaaccttag  
15781 caatctctct tataagtccg thaaacatta thhaacctta aaaaatthta thcaataatt  
15841 tattgatacc ctcatccact ttttctcctg cttthtgaac tccatctthgg gctthtatcg  
15901 ctacaatatt thhaatagaa thtactacac taccgctthc aagththaact tggggctthtt  
15961 gtgthgtthcc thgtatattg cttthaaaat tggctctatc tatcthaata thaaaaggca  
16021 aatthcaagct tccgctthta gaatthcagca tactthgaaga aataaggaca thaaacgat  
16081 ccgctthgat atthhaatca agctthgatat thtctthgtt aataagthgct thtagcattgg  
16141 cagtatgaaa aacatcagta gtgatatctt thhaagthaat aagcthaaga gctgcagthga  
16201 tagcattagg thhaagctha ccctctthca tatctgcat aacctctctc thgctgctha  
16261 thagattata cthhaactthc aaatthgcct thgctthgata tatatctata aatcaagthc  
16321 cactthccaa agthgcthaaa thtaccctc ctaactthtg atthhaaata thattthttca  
16381 aagthgctatc aagthtttctc thaaataaat thttactcaa thgagthaaa thhaagthtt  
16441 tatcaagcc gatatthtca thhaagctthg cttthccctt gagctthtca thgagthaga  
16501 aaccaactt thhaaaatca gcaatatcca aagcataatt cgaatthaaa atcattthtat  
16561 thaatgthcaa thttctthta aaattactha gattagccaa agaagaatth aacagccct  
16621 caaatcagc aacattgtht thhaaatccg cthhaacatt thagthgthaa thtgthattgt  
16681 thgggaatth thtatccatt aactgactha aaactgcagc atthhaaata cccttagcat  
16741 ctatattthac ctthgccatta agattgthaa aatthtatc atcthaaacg cttthtgcat  
16801 thactatccc actthgcataa thtggcatac ccacaatagt aaaaacctha gaaagatcaa  
16861 gctthgtthtat atcthaagtct agthttthttc catthaaatt thgctthgatt aaaccacctg  
16921 ctatattthgc atcagcgtth aaattctgaa ctthgagcacc tataatthgc gctthtgcat  
16981 thagthctgct ctthgctthgt aaatthtgcc ctgctatagc atthhaattga gacaaatcat  
17041 caataaaagc atthhaatct gtgthhaatt ctgcatthtt aagattgthag gthccatthaa  
17101 gthttthtgat atthgagcaa thggagccta agagcgcatt atagatata thgcatthtt  
17161 tagcctthggc thtagcatca agacthaagc thgthattthg aagthcaagt thggctattht  
17221 ththaatctc agcactatth aatthtgcat tattgattth tacatctgca thhaaatthg  
17281 caagthccaa tccctcgctc acaagatthg catthaaatt cccagaaacg ataccacct  
17341 aacctataag agctagthatt thttcthaaac thggcattact thgcatthaga thhaattgat  
17401 thgtthttthaa atthgcctth actthctccgc caagccctat aacattagca thhaacttag  
17461 ataaagcatt atthagccaca ctgcgcatcg cttthactthc caaagatcca thtagctthg  
17521 thttggthaac thttthcaagc thtgcaagat taggaaccga tagatcaaaa thctgattth

17581 gggatattttg aataagatta taaagagttt tttgagtttg taaagttaaa taactattat  
17641 aaattttact cactgtatag actgtatcat ctttgatatt tgctaaaatt tcagctttaa  
17701 gattagaatt ctcaggtaaa tctatattaa attctttttt gatttctgca taattttatat  
17761 aagtattatc aagtttaatg atagcatttc catcaggttt taaatcttta gcagaaattt  
17821 tacttgctat atctatggtt ccttttagcca aatttcctcg tccaaaaagt gctagtaatt  
17881 cagagatttg aagatcgta gcgcttaaat ttaaagcgat aggagaatat tcataaatc  
17941 tagcatccaa aagtacatta gagccaaaca aatatccctt gccattgatc ataaaatcgc  
18001 tcgattttcc attaatcttc cctgaaaaag ccaaattttg attcaaattt aaacctaaat  
18061 ttttagcata atttttatct aaattgatga tataatcaag atcaaaaccg agcttaaaaa  
18121 gactcaaatt tccttctagt tttaaatcag ccatattagc caaatttgcc tcaatatcaa  
18181 gacttgaaaa acgcagagta aactgagtga tattggcatc aagacctgta ctttgcttga  
18241 ttttatcttg gataaaatth gcgactatat tattaccaa gctagtaaaa agcagagtat  
18301 aaaatgctat caaaagcact acaataaaaag ccactattcc ataaagaatt ttcttcattt  
18361 aacatcctt tagttttttt aattaattat ctttagtctt attaactaaa gttttataaa  
18421 tatttttact caaagtattg acaaaattca ttttttatag tatgatatta tcaactcaaaa  
18481 ttaaagagtg ctaaaaatca atatttttaa ggatggacaa aatgaatttt caacctttag  
18541 gaaagcgtgt ttttagtaaaa cgcgtagaag aaaccaaaac aacagcttca ggtataatta  
18601 taccagataa tgctaaagaa aaaccactca cagggtgaagt tgttgcagta agcaaagaaa  
18661 ttactgatat tgcaaatgga gataaaatcg tatttgctaa atacggtgga acagaaatca  
18721 aacttgataa tagcgaatat ttagttttaa atttgatga ttttttagga attttaaaat  
18781 aatttcaaaa aaaggataaa caaatggcaa aagaaattat ttttccagat gaagcaagaa  
18841 acaaacttta cgaagggtgtt aaaaaattaa acgatgcagt aaaagttact atgggaccaa  
18901 gaggacgtaa tgttttaatc caaaaaagct ttggtgcacc tactattact aaagatgggtg  
18961 taagcgtagc caaagaagta gaacttaaag acagtcttga aaatatgggt gcttccacttg  
19021 ttagagaagt agcaagcaaa acagcagatc aagcagggtga tggtaacaac actgcaactg  
19081 ttttagcaca cgctatcttt aaagaagggt taagaaatat cacagctggg gcaaatccta  
19141 tcgaagttaa acgcggtatg gacaaagctt gcgaagcaat cgtagccgaa cttaaaaaac  
19201 tttctcgtga agtaaaagat aaaaaagaaa ttgctcaagt tgctacaatt tcagcaaatt  
19261 cagatgaaaa aatcggaat ttaatagcag atgctatgga aaaagtaggc aaagatgggtg  
19321 ttatcactgt tgaagaagca aatcaatca atgatgaatt aatgtagtt gagggatgct  
19381 aatttgacag aggttatcta agtccttatt ttataacca tgcagaaaaa atgactgtag  
19441 aactttcaaa tccttatatc ttgctttttg ataaaaaaat tgcaaattta aaagatttat  
19501 taccggtttt agaacaaatt caaaaaacag gaaaaccact tttaatcatt gctgaagata  
19561 tcgaagggtga agcacttgca acttttagttg taaacaaact acgcggtgta ttaaatatct  
19621 ctgctgtaaa agctccaggc tttggagata gaagaaaagc tatgcttgaa gatatagcga  
19681 ttttaacagg cggatgaagta atctctgaag aacttgaag aactcttgaa agtgctacag  
19741 tacaagatct tggacaagct tcaagtgtaa tcatcgataa agataataca actatcgtaa  
19801 atggcgcagg cgaaaaagca aatattgacg caagagtaaa tcaaatcaaa gctcaaatag  
19861 ctgaaacaag ctctgattat gatagagaaa aattacaaga aagacttgct aaattaagcg  
19921 gtgggtgttc agttatthaa gtaggtgacg caactgaaac tgaaatgaaa gagaaaaag  
19981 atcgcttga tgatgcttta agtgcaacta aagcagcagt tgaagaagg atagtaatat  
20041 gcggtggcgc agctttaatc aaagctaaag ctaaaatcaa tcttgattta aaaggcagtg  
20101 aagctatcgg cgcggctata gttgaaagag ctttaagagc acctttaaaga caaatcgctg  
20161 aaaatgcagg atttgatgca ggtgtagttg taacagcgt tgaaaatgct aaggatgaaa  
20221 atacaggctt tgatgctgca aaaggcgaat atgtaaatat gcttgaaagt ggaattatcg  
20281 atccggttaa agtagaaaga gtagctttac ttaatgcagt ttctgtagct agcatgcttt  
20341 taacaacaga agcaacaatc agcgaatca aagaagataa acctgcaatg cctgatatga  
20401 gtggcatggg cggaatgggt ggcatgggcg gaatgatgta agccctacta ccaataatca  
20461 gcaaattttt gctgattatt tctttttaaa ctgccaat ttgtaagata caaaaaataa  
20521 aaaaaataat acgcattaaa aatctgcaa gatacaataa aaaacaatat catgatcacg  
20581 ccataaaaaat ttgcaaagcg agtcatttat cagaaagtct tcacatttat caaaatataa  
20641 tctaaacata aaaacgaat taaaatgcaa agattgctta aatcatcttg ggtcaatgat  
20701 ctgcgaagaa atgatcttcc tgtgtatggt taccatacc aagccttatt aagtagcaac  
20761 aggcacagct atcctctttg ctctttggca tatttacgaa cagcttacat aactgtataa



20821 gataaatcag cttttttaat aaatthtatt tatagaaaa taaatthtta ttgataataa  
20881 ctataaaata agaaagtgtt tatagagctt caagcaagtg aatacaaaaa ttttattatc  
20941 ctttttcaaa tcttctttgt atcccaactt aacttaaaaa cactgccttc attttccact  
21001 gattcgcaaa tgattthta atcattatca tgcgaaattt tttttacca agaaagccct  
21061 atgccaagc ctccttgatc agtattaaat ctcgcatacc tatcaaaaaat gtgcttaaga  
21121 tttgtctttg aaattccaca acctgtgtct gcaatgctta aaaaacctgt ttttagctcc  
21181 accaaaatct ctccaccttt tttgttgat ttgattgcat tacttaaaag attgtctatg  
21241 agtttgaaa tttggttttt agaagcgaaa atacttgctt gatgtaaatt aagctttaga  
21301 ctgattttct tttgctcaaa aaatatttta aaatattcta gtctttcttc aatcaatgcc  
21361 ttttaagtcaa gttcttgttt attaagctct aaggtattag gaaaattata aaaaacaaga  
21421 tctgaataca cttgagacaa accttttgca gctaatttta tccttgtaaa tttggtatta  
21481 tgctctagtt tttgattttc aagttgttct atactcatca aaatcacgct taaaggagtg  
21541 ttaagctcat ggggtgaatc tttgataaat cgattaagag tgatgatctt atcttcta  
21601 ggttttagag caatthttac taaaatataa gctatcaagc ccaatacaca aaaagccatg  
21661 atggcaaaag aaaaaacttt tactctaate caaacaagat cttthttaac gtcctcgcct  
21721 tggattaaaa ttttcaatcc gctttcagta tgtatattat cttcatttgc atgctthtaa  
21781 aaataattat ccgtattcat acgatcaaga aaaaatactt taccatcata aattccccta  
21841 cccttaagct caacccttgc ttttctaaaa tcaaaatcca gattatcaaa aatagcctgt  
21901 tttttatcaa aaatagcaaa ttttaagtcca gtgctttggg cgatattgct agcactttca  
21961 ttcattgggaa caaacgaga atttaggata tttataatga ttttctatg attttccctt  
22021 aaagaagtac cttttacaac tactaattct tcatataatt tttgatacca taaagtaaaa  
22081 aagatcgcta aaaaaatacc tgtggtagtc aaataaatca ataaaattg cctaattgact  
22141 ttttttagcca tagcaatate ctctgccctt ttgattgata atttttctt ttctaatat  
22201 tttacgcaaa tttthtaatat acgctcttaa actaagttca ctaggctctt catcatactc  
22261 ccaaagttct tcaaaaattc tttcagtgc taaaaaatta tttttatttt ttaaaagtaa  
22321 agataataat ttaatctctt tacttggcaa agttaaagct ttatcaaaat ggtaaagaat  
22381 ttgagaggta aagctaaatt taaaccatt tcctaaatct tcataatctt catttttatg  
22441 agaaaaagcc ctctthtaaca aagcttgaat gcgaattgaa agttctgcaa gctcaaaggg  
22501 cttgcgtata taatcatcac aaccggcatt ataaccctt tthaaatctt ctgttgatt  
22561 taaagaagtc ataaaaatag caggagtttg ttttcacaa tctcttaatt cttthataa  
22621 agaaaatcca tgccccaag gaaccttaac atctaatac catacatcaa aatgtttttc  
22681 ataagcgagc tctaaagcct ctttagcatt ggtacataaa taaacttcat agccctcatc  
22741 gattaaaaat tcttctataa tctcacttaa actthaaatca tcttctaaga gcagaattct  
22801 agctgccaca agataccttt ctttgatatt tcttgaaatt gtatcaaaaa atattgaaaa  
22861 aatggthtaa tacaattaa tttatatttt acttattttt atgttataat cttthaatgca  
22921 aataaatttt tcaaggagtc aaaatgcttc caaatggga cagcagtttt agtgtgcaca  
22981 atgcaaaaat tgatgatcag cataaaaaac tttttgagct tgcagcaaag gttgaaattg  
23041 tttctgatag atcagtaagc aaaaatgaag taaaagagct ttttagctgaa tttttcaact  
23101 acatgaaaga tcattthta atgaagaga aatatatgca actcattgct tatccagcat  
23161 ttgagaaca taaaaaatt cataaagaaa ttatacaaac catgattaat cttthaaag  
23221 atatcaaatc acaaatgat cthaaagaaa agctthtat tatagcaaaa aatggctct  
23281 tagagcacat actctatgaa gacatgaaag tagaaaaatg gagaagctct tctthtagcaa  
23341 cagacgaagg taaagatgtc agctthtgaag cagcggatga tagcgacgat gacaagccgc  
23401 aatthtatct ttataaatgc aattgcccag gtaaagtaca tgatgtccct tatggcatcc  
23461 atcaaaaaat tgaattcaa ggacacaaat tcacttgcaa aacctgtaag caagcaatta  
23521 cattthttca aaaacattcc tagaaagggt aagtthaatga aacaagaaac tagaaattat  
23581 tcccttagaa tgcctthtaga actthaaagaa cgcttagata atthtagtaa aaatctttcc  
23641 aagcctaaat caagtatagt tagagaggcc ttgaagctt atctthaatga aattgaaat  
23701 tttctttttg cagtcaatgc tttagaagaa tthaaagac gagattattc aaaagcgagt  
23761 aagaagatag ataagttgt agaaaatctt caaaaggaat cagatgattt aggtgatttt  
23821 gattthtcta tcgaagcctt agaagaacta aaagacggag attattcaaa agcgagtaag  
23881 aagatagata aaatcgthaa aaatctcaaa aaaccagaat aacattata aatacttht  
23941 cacattgtga taaagthtat taagthtat caatthaaaa atatgatttt atacagagtt  
24001 agaagtggtc ccggatgtag gattcgaacc tacgaccaat cggthaacag ccgactactc

24061 taccgctgag ctaatccgga atatcttaaa aagtaaaatg taattatatt tgatttttaa  
24121 aactttgtca agtatttttt caaaaaaatg caaaaaatth cattctttta caataatact  
24181 ttttaaattt ctaaaataaa acaaattcac accctcttca taatcataat caagcttcat  
24241 tccatgagat tctaaaatgg tattaactat ataaagtcca agtccaaagc ttgatttttg  
24301 ctttgagcct ccttgagtaa aagcttgagt gtaatactct aaagtattat ttaattcagg  
24361 acctctatth ttaaaacaaa tataatcatc cattatatca atttgtataa agccattttc  
24421 agaatgctta ataccattat caatcatatt tttaatcgca gtggtaaaaa gcttgaaatc  
24481 tacattcaca aaaaagctct catccataaa aatgcgtatg ttattatcat ctgcatagc  
24541 gatttcttta gcctcatcta aaacatctaa aatattatat tttttgctgg tgataaatgc  
24601 tgctccggaa gtaatttggt ctatggctgc aaattcgttg ataagaattt caagacgatt  
24661 aatatgctt cctaactttt ctttgtatth gttatcctct aacatttcaa gagtgataag  
24721 tcctttagta atcggggttt taagctctgt cataatattt cttagaataa attgacgcga  
24781 ttgattgagc ttacgaatth gaacgattgc ttgataaaaa gcttcactta cttgagaaat  
24841 ttcattccact cccgtgctta catcttctat atcattaagt tttccttgag caaatthtct  
24901 aatttgctc tttaaagctt ttagaggttt taatttttta aatatataaa tataaagcaa  
24961 tacaagtata caaataacag ctacggctat ggctttaatg ataaaatct tataagtttg  
25021 ataactttga tctttataaa gatttacctt gccatcaaaa ataatathta aatacacttg  
25081 tctatcataa gagatgattt caatcaagcc attattgacc tcgactctag ctaacacttc  
25141 tccgcaaat agaattctac gaatttgctt aacctctaca acagactcca tttgttata  
25201 gttttttgtt tgctcttcaa attctttttc gctaattatc cctgcaaaat ttaaaagcct  
25261 tgctgttagc attaaagaat acttggtggt taattctcta gtgtaattth gctgatcata  
25321 ttctatgagc cataaaaagc caagaataac actaacgcca gcaaaaataa aaataaaagt  
25381 tatggtataa aaaatagatg aacgattcat tgagtaagct tatagcctat acctctgata  
25441 gaatggatat attttgaggt ttttgatca tcaacctttt tttgacgaat gctgcttaata  
25501 attacatcga tacttttatt gctcgaatct tcaactgatt aagaacaatt ataaacaagc  
25561 tcttcgagc tgacaacacc gccttctttt ttgatcaaat agcttaaaat gtcaaattht  
25621 gcattggta aagtaagctt ttgaccctt atttgtgataa tgtgcttgta ttgatcgtaa  
25681 acaagatctt taacacttht tgctatggca ctttttgtat ttgaaatgct tcttaagtga  
25741 ctcttgatgc gtgcttgaag ttcttttagga ttgtaaggct ttggcaata atcatccgct  
25801 cccaattcta aagcattaac cttatctgta atatcatgct tagcacttga gataataata  
25861 ggcgtatcat actttttacg aatttcttca cacacttcaa gccatcaag tcttggtaaa  
25921 gaaagatcta aaattataag ttgatattct ttttaaggct gctttgaaag acctatataa  
25981 ggctcatgtg cgatatcaac tttcatatca aatttttcta aatattcagc cgtaatttca  
26041 gcaagttcta aatcatctt tatcataagg atatttgtca ttgcattcct tttactatat  
26101 ttaatctcgg ttttaaaatt ttaaactaaa atatataatg aaagggaaac ctttctgtaa  
26161 aaactatthta agtatcaaca aagttgcaaa accattgctga taaaccctaa ttttagtaaa  
26221 ttcttttttc tttacttgct ttaaagcttg ttctaaatct tttaaattht taatttcatt  
26281 ttgtcctaca cctatgatga tatcacctt ttgaaatcct gaatccttag cctactctt  
26341 atcttthaca ctttctaca aaacccatt tacatcttht ggaatttgca aacgctctt  
26401 aatcttgga tccaaattc ttaaagtcac acctcaatc aatcattht gaacagcctt  
26461 aggatttht ttttctcct tgagggtaaa atcaactctt ttattthtcc catctcttct  
26521 ataactaagt ataatttht gacctatct taaagtacct atatagtht taagatcact  
26581 tggactthta attacttht cattcacctt agtcacctaa tctccgctg taagtcctgc  
26641 ttcattcggca cttgagcctt tttgcacatc agtaattaaa gcaccatctt gattthtata  
26701 agctthtthta gtatcacctt gtaaagcaga aatagttaca ccaaaaatc ctctatcaat  
26761 cctaccttht tcaatgagct ttttagctat atctthtacc atatttgaag gtattgcaaa  
26821 tccaatacca ttattthcac cccacgaga gagaatggct gaatttatcc ctactaaaa  
26881 tccacgacta tccactaagg caccgcctga atttccagga ttaattgaag catctgtttg  
26941 aataaagtht tcatattggt ttaaacctat attgtcttht tttaaagcag aaattatccc  
27001 acttgtaaca ctaaatccaa caccaaaagg atthtctaaa gcaaaaacaa catctcctt  
27061 cattaaatca tctgaatttg tgaagtaat agcccaaga ttatttgct ctattthta  
27121 caccgctaaa tctgtcttht gatccttgcc tataagctth gctthtatt ctgtatcact  
27181 gcctggtaaa cttacgctaa tggatctgct atcatctact acatggttht ttgtaacaat  
27241 ataacctct tgcaaaataa tcacgcctga acccaagaa ctgactact ctttactatt

27301 ccctcctctt ctttgtggaa aatcaaaatc aaaaaattgt ttaaaataag gatcatta  
27361 aaaatcatcc aaaggacttg gacgattgac ctttgtgata gtttttgaag tagagatatt  
27421 tacaacagat ttttttagcat cttttatcga atcatgataa gaaagaattg tatctccagc  
27481 cgcaggatta acacgattgg ttgttatgct tgtttcatta aaattgatat ttgcagcaaa  
27541 taaagcactt gctaaactca atgataaaat aagctttttc attttgcttc cttttttggt  
27601 tatattattc ttaaaaaaca tatgatttgt aaaatatttt acgcatttca taagtataaa  
27661 accgaaaatt tacaaaattg taaatgaaag cttgagtgat aaaaatttat aaaacttgat  
27721 tgacttaggc taaagttttt gatataattt ctacttaaat aaaacaatta tatatttttt  
27781 aaggaataac atgaatagct tatatgaaac acttggagtg tctaaaaatg ctagtgcaga  
27841 tgagataaaa aaagcctatc gtcgttttagc aagacaatat catcctgata tcaataaaga  
27901 aaaaggtgcc gaagaaaaat ttaaagaaat caatgctgct tatgaaattt taagcgatga  
27961 aaaaaaacgc gcacaatatg atcaatacgg agactccatg tttggagggc aaagtttcca  
28021 tgacttctca agaaatgcag gtggagtcaa ttttagatgat atcttaaaag atctctttgg  
28081 cggagggtttt ggtggaggct cttctaaagg aagtcgtttt aatggttttt catcaaaagg  
28141 ctttaatgct ggatttggag gttttggtgg atttgaagaa gaagatttgg attctactat  
28201 agaacttagc attccttttg aaaaagcagt aacaggtgga gaatatagct ttagccttca  
28261 aggagaaacc atcaaattta aaattccaca cggaatcaaa caaggagaaa agcttagaat  
28321 tcgcaacaaa ggcaaaaagg ggcgtaacgg aacacgctgg gatttaattg ttgtagtcaa  
28381 attaggagaa agtgaaatat atcaaagaga agatgatgac ttatatcaaa aagttgacat  
28441 ctctttaaaa acggctctat ttggtggaaa agttaccgtt aataccctta aagaaagtaa  
28501 aaaagaagcc accataacca tacctgcaaa ttctaaaaat ggacaaaaaa ttcgtcttaa  
28561 aggctatgga gtacaaaatc gcaaaagtga tatctatgga gatatgtact tggattataa  
28621 tgttgtttta ccaaactg aaaccctaga tgagaaatta atcgaaatgt taaaagaaaa  
28681 actatcataa aaaaggagta aagtcatgga acaccattat gatgaaccg tatatcta  
28741 aagcgtcgta gcaaaagtgt taagtataca tccacaaacc ctaagacaat acgaaagaga  
28801 aggcttgata gagcctagta gaactgatgg aaaaaataaga ctctattctc aaagagatat  
28861 cgatcgata aaacttatct tgcgtttaac gcgtgatatg ggggtaaatc tagcaggagt  
28921 agatgtaatc ttaaagctta aaaatcaact ccacgaattt gaaaatttaa ttgatgaatt  
28981 acgcttagag cttagcaagc aacaaaatcc aaacgcaagc tcgaaagcgg ttgtaaaaca  
29041 taaaaatagc tttgatntaa ttttttatga aaaaaaatag atgggtaatt ttttagaaat  
29101 ttttttaatt acagctgcca tagctatcgt tcttaatggt atttttaaga aatttgaaat  
29161 tcctactatt atcggctaca ttgccgcagg agagattatt tctgaaattt atcatctaag  
29221 cggcaagggt gagattgcac atattgctga atttggtata gtatttttaa tgtttaccat  
29281 agggcttgaa tttctttta agcatttaat ggctatgaaa caggaagtat ttttaaatgg  
29341 ttccttgcaa atgcttacct gtggctttgt ttttatgttg ctagctatag gaattttagg  
29401 acttggtgac aaaagtgcaa ccatagtagg ttttgctcta gctctttctt caaccgctgt  
29461 ggtgcttaaa attttaaatg ataatggcga tatcaatgag caatatggaa gaaaagcttt  
29521 aggaatttta ctttttcaag atatagctgt gattccttta ttattgcttg tagatttctt  
29581 ctcttcaaac aatcaaaaca taggacaatt attactcaca acccttcttt cagcggccat  
29641 ttttaattgct ctgcttttct ttataggtaa atacttagtc gataggatat ttaggctcat  
29701 catacgcc tcctcacaag aaatttttat cagcactata ctttttatgg tgattggagc  
29761 aagctttttg gcgcattatt ttggtttttc ttattcttta ggagcgttta ttgcaggagc  
29821 cttgatagca gaaactaaat acaaacacaa aatcgaagca gatttaatcc cttttagaga  
29881 cttgctttta ggtttatttt ttataaccgt aggaatgcaa attcaacctt gcatcgtagc  
29941 gcaaaattgg tttattatct gtgttttaac tctgctcata atgggtttaa aattcggcat  
30001 agtgtgtgggt tttttatttt tatataccaa aaaaagagtg gcattaaaaa ctgccttttc  
30061 cattgcccaa gttggagaat ttgccttagc gatcttttca ctcttgcaag caaaaagcat  
30121 gttgatggt gaaactgctc aaattttgat tgcgttttct attataacta tgattatcac  
30181 tccttttgta ttaacaata taagaaaaat agccaatgta gtagaagata tgactttaaa  
30241 taccaatgct gttcagcaaa gcactcacag cactctaaaa aatcatcttg taatctttgg  
30301 atatggacgc ttagggcaag agatagtgca aaaaatcaaa aatactggtg ttccttattt  
30361 ggttttagaa agtgatttaa atttggtaga gcttgggtata agtcggggcg aaaatgctgt  
30421 ttttgctaag gctgctcaag aagaaacact caaaatagcc aacataacag aatgtgcagt  
30481 agcaatcgta accataacca acgaagctaa actcgaatg atttgtcaag tcttagcttc

30541 ttatccaaag cctattgaca caattatcca tgtcaatggt agtcttgaaa aaatgctttt  
30601 ttcaagcatt gatgagaata ttcgcattgt aagatctgaa aaagtcatcg caagaaatth  
30661 ggtccaagaa gctctagaat gcagaattca taaaaaact taaaggataa tattggcaaa  
30721 aattgatgaa aaaactctaa gagttaata ttttaagagct ttagaaaaat ttgcaaatgc  
30781 agctatttca gctttaaaaa aagaaaatth tgataaagaa aaatttcaag aaagaatgga  
30841 aaaaaataaa aaaatagttg aaaaatgcga ggcagtaaat ttaaattcaa gctataataa  
30901 aaccttagaa aatthttaa ataattgcct tgacttctca aaacaaaaag aagagcttct  
30961 aagccttgca aatgctthtg ataaactcaa aaaaggcgaa aaaaaagaaa aacataaac  
31021 ttatttgaag gattattatg attaatgtat ttttgatat ggacggcacc ttaatcgaca  
31081 gcgcaaagc tatactttgt gctgttaatg agataagaaa tgaactaac ttaagccac  
31141 tttctaggga aaaaattatg caaacatca ataccctaaa tgtagactgg gcgaaagagc  
31201 tttatagtat cgataatthc catcattcta gctthaaaga tggthttgag aatattthca  
31261 tcaaacacta tgagcaaagc gtagthttat ttgaaggat taaagatata ttggaattht  
31321 taaaagaaca aaatgthttt ttagctatcg ctactaatgc accctaaagc tcactthcta  
31381 gtatacttaa aaaacatgaa atcattcctt atthtgataa aatthtaggc gtaagtcttg  
31441 gtatagaacc aaaacccat cctatgatgc ttgatcttht aaagtctgaa gcacccata  
31501 aaacaagtat thttataggc gatagtcaa aagatagaga atgtgcaaaa aatgcgaata  
31561 tgcctthttt tcacgctaaa tggatcaa aggatthgca agaaaatgaa tttagcaatg  
31621 caagcgaact taaaaactth ttagagagat atthataagt thtttaatga aaatgagct  
31681 aaaaataaat aaatthttaa aagagtaata tatgagttaa ttattaatag aaatcggaac  
31741 agaagagcta cctgctattc thttactaaa agaattagcc aatatagaaa aaaaatggaa  
31801 agatgthttt gaagattatc gcttggtgag tgatthttaa thttactata ctctcgctc  
31861 thtagtgatt thtcatgaaa atthcgcaag caacaagaa gatagctthg ctgaattht  
31921 aggtgcgcct aaaaatgtcg ctataaaga ggggcaatta tcagccgcag ggcaaagctt  
31981 thtcaaaaa gcaggtatta gcgaaagtga gctthcttht aaagagatca agggcaagga  
32041 agtcttatat catcaaaaag ccattaagg thtgcaaagt caagaagtht taggagagat  
32101 gattcatcaa thcttaaaaa gccttaactt tggcaaaagt atgcgctggg gtgctaattc  
32161 thttgaatth atccgtgcaa tccgctctat agthtgtatt ctatagata atthtagtga  
32221 atthgaaagc tatggcgtht agagtgctaa aaagacttht gtacatagaa gtgtaagcta  
32281 tgacttgcaa gaatthtaata acgcaaaaaga gtatthtagc thtttagaga aaaatcatat  
32341 catcttagat ccgctcaaaa gaaaagaaag aatactcaag caatthtaac tcttagaaag  
32401 ccaaaacaat atccaaatag gcgaagatga agagctthtg gctgaagtht ttgctatcac  
32461 agaatatcct aatgcactth taggaagtht tgaagaagaa tatctthcaa thcttagcga  
32521 agttatcatt acttccatga gagaaaatca acgctattht gcagtcttht atgaaaaagg  
32581 tctaagtaat catthtatcg tggtaagtaa cgcggtgtgc gaggactact caaaaatcat  
32641 tcatggcaat gaaaggtht tacgcgcaag acttagtgat gcaatgtht tctatcaaaa  
32701 cgacttgcaa agcggcttht atcctgaaaa acttgctaaa atgacttatc thgaaggctt  
32761 aggaacaatg caagataaaa gcctaagaga gataaaaatc gctgaagtht tatgcaaat  
32821 gctaaacaat gataaaatcg caaacataag tactgcgac aaatacgcaa aagctgactt  
32881 agcaacgcaa atggtthtat aatthacaga thtgcaaggg atthtgggaa gctattatgc  
32941 acaaaaaatg ggcttagatt atgaaattht tcttgctata aaggagcaat acctgcaaaa  
33001 thccgaacaa gctccacttc ctatagactga atthtcaagc atagctgccc thgcaacaa  
33061 gcttgatact ctataggac thtttagtat aggcaaaat ccaagtggca caaagatcc  
33121 thacgcctta aggcgcgctg ctaatgggat aatcaaaat gccctaaat taaacaaaga  
33181 atthgacatt caagcactac tagaaaaact agcaagccac tataaaaact thgatatgca  
33241 aatthtaaaa gaththttht thgaaagact thatacttht tatagcgtta acgctthtth  
33301 tatcaaagcg gththtaagth ctaaaaatc agatcttatc cacatcaatc aaagcgtaaa  
33361 agcccttata gaatthagca aaaaagctaa thttcaagaa aatthcacta cthtaaaaag  
33421 actggccaat atcgctaata aaacttcaca caaagctgat gaaaacctc thattgaaga  
33481 agcagaaaat aaactthtata aagcctthta ggaaaaat caagcact cthtaacaaga  
33541 aaaaactgaa aatctcttht cgctthaaac thttatagat gaatthtctg ataaagtaat  
33601 gatcaatgct gaagatgaaa aactthaaaa taatcgcaa gcacttatc atgaaattht  
33661 cgaagaatc taaaaaatcg ctgatcttht agagthtaagc ctatgaaagc thtttgctt  
33721 thtctaagcc thgctctthg gctthttgga gctcaaaat tcgagcttat caaaggacaa

33781 gctttat tttt tggaactgga taaaaaagat tttat ttttctt taaaaaatga ggataaaatt  
33841 ttagccacct ttcctcatcc taaaaatcaa gaaaaaat ttt tagctatatt ttcactgcct  
33901 tataaaaatc cacctcaaaa tacaaaactg attgctcttt ataaaaacaa aaaagaagaa  
33961 atttttataa aaacttttaga aggcaattat aaaagtgaaa aattaagcgt agaaaaataa  
34021 aaaat ttttc cacctaaagc cgttaaagaa cgcattgcta aagaatttaa agaagcta  
34081 gcaatttata gctcttacac tccaaaagct ttatttgatg gctcttttaa tactccttta  
34141 gattctttta tcacaagtga ttttggcaaa gcaagaacct ttaatgaaaa agttgcaagc  
34201 tatcacagcg gaacagactt tagagctgct gtgggaactc ctatctatgc ggctaattca  
34261 ggcatagtaa aaatagcaaa agatcgttat tttgcaggaa aatccgtagt cattgatcat  
34321 gg ttttggaa tttactcgca gtattatcat ctttctaaaa tcgaagtcaa ggtaggacaa  
34381 aggattaaaa aaggtgattt tttaggactg agtggagcta caggaagggt tagtggacca  
34441 cacttgcatt ttggtat ttt agctggaggc aagcaggtag atcctttgga ttttatctct  
34501 aattcaata cactttttca atgaaattca gtgaat tttt tcatacttgg ctgcatgaaa  
34561 gttattataa aaacgctggt agtataggta aaaatggaga tttttttacc gcagtaagcg  
34621 tgggaaatct ttttggcact ctttttagcaa agcatt tttt agatcttata gataaaaaag  
34681 tcttaaaatt tcccttagaa cttgtagaaa taggagccaa tgagggctat ttaagcaggg  
34741 attttttagc tgctttactt gaatttaggc ctgaaat tttt ttccaagctt tcttatttta  
34801 tcatagaacc tcatgaaaa ttaagaaatt tacagaaaa aacttttagaa ggcgtggaat  
34861 ttacacataa gagaagctta aaagaatgtc attttgaaaa tgcctttttc ttttgcaatg  
34921 agctttttga tagttttgct tgtgaattaa tagatgatga taaaatggcc tttgtgcaag  
34981 attttaact tgtttttgaa cccatgaagg ctaaattaaa agaaaaatgc gaaat tttta  
35041 atttaaaaaa aggcaatta agcctagaat tggaagaatt ttttaaagat ttggataaag  
35101 cttctaaaaa atttatcttt gcaag tttt attatggcgt gtttaatccc gaacaattta  
35161 gcattagaat ttatcaaaaa catgaagttt ttaatccttt tgaaatcact ttaaaagatt  
35221 tttttggtaa aagcgattta acctataatg ttaattttac tcaaattcaa cagcttataa  
35281 aagaacatga ttttaactc ttagctctaa aaaaacaaaa ccaagccttg attgattttg  
35341 gttttgaaga attattaaaa tacaccaag ataaaaatct taagacttat gaaaat tttc  
35401 tttcacaaag taaaat tttt ttttttaatt ttgatgaaaa atttcacttc tttgaatttg  
35461 caaaattcta gcattaacac ttctcataaa ataaagcgtt gaaagtttat ctttataatt  
35521 ttttacataa aaacaagaat gattaaaaaat ttaaatcagc catacaaagc ccctctctta  
35581 aaccctcatc aatcactata agcttttctc tctcaaaaat gctaaaaagt aaaaaacatc  
35641 ccgcgaccaa ataatt tttta cgcgtat tttc ccacccaaaa acttgctctt ttttcatcca  
35701 tatgccaaag tctttgccca aaatttaaaa aatcattgac atttaatctt gagccattga  
35761 ttttcttcgc attatatttt tcataattta atcctttttt taaagccgct agagccgtag  
35821 gaacgcctga atttaaaacg atatttttca tcttactttg ttttaagcatt ttttttaatt  
35881 cattgctttg tttaaaagcc tcaaaagcca tgg ttttttaa aaaattatca tggattaaaa  
35941 aatggatttt tagtttttta tctttaaatt tataaggaaa atcaggatat ttttgaagta  
36001 tttttttaa agaaaaagaa ttttacgctt tttttatctt gcatttttca taaaaactga  
36061 taataccaaa atcaaaactt tgaaaattct ctctaaaaga aaattcacia gatgcacctc  
36121 ctaaatacaca atatccaaa tccaaattta agcctaaatt taaaagcccc attttcatac  
36181 ccaaaacact gatttttagct tcacttttgg catctataac cttaaaatca atttgaaatt  
36241 cttgctttta acgagtaaaa atttcacttg tattgcttgc ctttctaaaa gctgcagttg  
36301 cggctgcttt tgcttggctt agatcgtatt ttttagctat ttcttgaagt gcgttgcgaa  
36361 gtttttctat ggcttcatcg cttatctttc ccg tttttatc taaat tttta gccgagccta  
36421 tgataaattc atattcatct aacttttcaa atttttcatt tataaaaacc gctcttaaag  
36481 tatttgagcc aagatctata cctaacatcg ctttcttat ttaaatttat agtataatag  
36541 caaaaaagtt ctaaaggaaa aatatgcttt taggtgtaaa tatcgatcac attgcagtat  
36601 taagacaagc tagaatggta aatgatcctg atcttttaga agctgctttt atagcagcca  
36661 aatttgggga tcaaatcact ttacatgtaa gagaagatcg ccgtcatgct caagattttg  
36721 acttagaaaa tatcatacgc ttttgtaaaa gtcctattaa tttagaatgt gctttaaatg  
36781 atgagattct aaacttagcg cttaaattaa aacctcatcg catcacctta gtgcctgaaa  
36841 aaagagaaga gcttaccaca gaaggtggac taaacttaaa tcatgataaa attaaagaaa  
36901 gtatagaaaa acttcaaaat gcagaaattg aggtttcgct ttttatcaat cctagcttag  
36961 aagacataca aaaatcatat gagttaaaaag ctgattttat agaacttcac acagggcatt

37021 atgcaaattt acataacgca ctttttagca atatctctca caccaccttt gccttaaagg  
37081 aatttgattt aagtaaaaaa atattgcaa atcaatttga agaagaatta agcaatatag  
37141 aaatttgtgc taaaaaagga gtagagcttg gattaaagt cgctgctggg catggactaa  
37201 actataaaaa tgtaagccaa atagtaata tcaaagaaat ttgcgagctt aataticggcc  
37261 aaagtattgt agcaagatcg gttttttag ggctacaaaa tgcgatttta gaaatgaaag  
37321 cgctgcttca aagatgaaaa aattagccgt cagtataggc gatattaatg gcatagggct  
37381 tgaaattcta gcacgctcac atgaaaaatt aagccaaatt tgcactcctt attattttat  
37441 ccatgaaagc ttgctccaaa aagcttttaa acttttaaat ttagagcttt taaatgcaaa  
37501 aatcgtagct ttttaaggat ctaaaaatta tgaatttaca ctacttaaaa agcataattc  
37561 tcttgaaatt tattcttttg gcttgccttt aaatttaaaa gtggatgaaa actttgacat  
37621 taaagcagga gagatagatg caaaaagtgg actttatagc tttttaagct ttaaggcggc  
37681 gagctatttt gtttataaaa atcacgcaca cgccctactt actctaccta tacataaaaa  
37741 agcttgggag aatgcggggc ttgaatttaa aggacatact gacgcactaa gattcttttt  
37801 taaaaaaaaat gccatcatga tgtaggatg caaagaactt tttgtaggac ttttagcga  
37861 gcatattccc ttagcaaaaag taagcaaaaa aatcactttt caaaatttaa gtattttttt  
37921 aaaagacttt tatcaagaaa ctgcctttaa aaaaatcgga cttttgggtt ttaaccgcga  
37981 tgcaggagat tatggggtaa taggtggcaa agaagaagaa cttatgcaaa aagctatcgc  
38041 tttcgttaat gcttttttaa attctaaaaa agatgaaaaa ttctttaaaa aagctctaaa  
38101 agatgagaat ttacaaaaag aattgctttt aaattttaat acaaaagggtg tttatttggc  
38161 ctacccttta gtcgcagata cagctttcac aaaagcaaat ttaaaagcat gcaatcgctt  
38221 gatagctatg tatcacgatc ttggcttagc acctttaaag gctttgtatt ttgaaaaaag  
38281 tatcaatgtg agtttaaatt taccattat acgcgtaagt gttgatcatg gcaccgcatt  
38341 tgataaggcc tataaaaaatg ctaaaatcag tactaaaagc tttttgaag cagctaaatt  
38401 tgctctagaa ttgccctcta aagcttcaat ttagcgttat catcgatcaa gccctcttgg  
38461 gctagattat ctataaaaat ttccaaatct ataggatctt gaatgctcat ttggattaaa  
38521 ttttcatacc tatctacttg attattaaaa atttgcttta atctttcttt gctttgagta  
38581 tcttttttag ctttttgc at aagctctaaa aacgctctag cataagtttt ttctatacaa  
38641 tcagtcttat aaacaaaagg cgattgagga tcttgacttg cttggatata atcatttgat  
38701 gtggcttttag tgcaattttt tctttctcta aacatttttt taacaaccaa tttaaaatct  
38761 tcttttata tttcatttgc atttttttaa agctcttgat ataaacttat aaagatatta  
38821 tccatcaaag caagtttttt attttcaaat tcattaatag cacctatttt attgcatata  
38881 attaatcat catcattttt gccattatct ttaaccttaa agcaatcaaa gcttggtttg  
38941 acttcatttt tatatataag ctcatcaaaa ctcaagcccc ataagctaag aaaacttaaa  
39001 attgtcaata aaattatctt cattgcctct cttgttttt tgttttattg taacaaaaat  
39061 atttttaatt ttttataaaa aatcaaaaat acaaaatttt taaccatcac aatacggatt  
39121 ttttttaaga aaaattaaca aagccataaa aactcttttt atcttaattt ttgataagtt  
39181 attcaaaatt tgcaaaaaaa tcttttaaaa attctaaatt ggaataaaaa ttgcttatct  
39241 aattttaa at caacaacaaa ggaggagaaa atggtggtaa aagatatcca aacaacttca  
39301 agctctatgt ttagtgctac aaccaaaagt aaggaaaaaa gcacttcagc agatgaattt  
39361 caagctactc taaatgaagt taaaaacaaa gaagataagg aagataaaaa gacaagttca  
39421 agcgaattta ctaatgaaga tcttgatctt agtgctgtta aagaagattt taaatcttac  
39481 gcttggcaaa aatgagaga agatcaatac aagaaaaatg aagaagattt actcaataaa  
39541 ctttttgcaa ccatcgatgc gggaaatact gctaaaatat aaatttaaac ttaaaatttc  
39601 attgcgagaa tttttcaatt ctctgataat tttataaaat accaaaataa gacaatcata  
39661 aatctttcac acaataaaac acatttattt ttatcaattt ctgttataat tttatcaaaa  
39721 aaacaaagga aaactatgat ttttatcgac gcttgcttta aaaaaccac accttataca  
39781 cccatttggga tgatgcgtca agcaggaaga tatttgcttg aatataatgaa agttagacaa  
39841 gaggcgggag attttttatc tttatgtaaa gactacaaaa gagcttcgga ggtttcttta  
39901 caacctgtg atattttagg gtttgatgca gcgattatct tttcagacat tttagtagtc  
39961 cctcttga aa tggggatgaa tttacgcttt gaaaaaggcg aaggaccggt atttcaaca  
40021 cctatttcaa ccctagaaga tcttaacaag ctgatgatc aaaatgcttc taaaaacta  
40081 aactatgttt atgattcttt aaaactaaca cgcaaaaaat tgcctcttga taaagctttg  
40141 ataggatttt gtggcagccc ttggaccata gcaacttata tgatagaagg aagtgggagt  
40201 aaaaattatg caaaatgcaa aaaaatgctt tatcaaaatc cagaactttt gcatgaaatt

40261 ttaaataaac tcaccaagt tttaaaatct tacctagaag aacaaatcaa agcaggtgcg  
40321 aatgcagtgc aaatTTTTga cagctgggCG agtgctttag aatgtgataa atTTTTtgat  
40381 ttttcattta aatacatgct tgaatTTTct gattttatca aaaataaata ccctcacata  
40441 cctgtaattt tatttcctaa aggtattagt ggttatttgg ataaaatcga tggaaatttt  
40501 gatgtTTTTg gggttgattg gagcactcct cttgatctag cacgCGataa attatcccac  
40561 caatacacc tacaaggcaa tatggaacct tgcagacttt atgataaaaa agctatcaaa  
40621 caaggcgtag aaaatattct tgaattatg caaaataaag cccatatttt caatctagga  
40681 catggaatct tacctgatat tcctgttgaa aatgcaaaat actttatcca actcgtgcaa  
40741 gaaagttag ccaaatgaaa atttcttttg gtcccatcaa ttcaagacgc tttggaagat  
40801 ctttaggcat tgacctaatg cctagtaaga aacaatgcaa ttttgattgc gtatattgCG  
40861 aacttgaagc tcaaaaacct caagcaagc aagatgagat tgtaagcGta gaagaaatta  
40921 ttttagaagt tcaaatgct cttgaaaaaa atatcttatt tgactttctt accttaacag  
40981 ccaatggaga accaagcctt tatccgcatt tagataaatt aatctcatcc ttacgcaaga  
41041 tcgccaaga taaaaaattg ctcatTTTaa gcaatggcac tgcagtttta gatcaagata  
41101 aattcaatac cttgttaaag cttagatgtg ttaaattcag cctagatagt gctatttcta  
41161 aaactTTTta ccgtatcgat agagctTTTaa aaaatatcga tttggaaaaa atgataaaaa  
41221 aatggcaga attttaaacc caatttaaag gcgatcttgt aatggaaatc cttgtcGtaa  
41281 aagatcttaa tgacaacgaa gaagaattta tcgctTTTaaa tcaagctTTTta gctaaaatag  
41341 cgcccttaag agttgattta agcactatcg atagacctc agcttatgCG gttaaaaaaa  
41401 taagcgaaga aagactTTTta gaactTTTcta aactcataac ttccactcct gtgctTTTtac  
41461 ctaaaaggca ttatgaggGC gaaaagtTaa atTTTggtga agaagaatta ttaaaaatgc  
41521 ttcactctag ctCGcaaagt gagatagata tagaaaataa attagataaa gcttccaag  
41581 ttctTTTtaga taagcttata aaagaagaaa aagtgaagat tcttaatcta gcaggagTTa  
41641 aattctataa agcctaattt ttaggcaaat atTTTctaat caaagctata agatcatttc  
41701 tactgatatc attttaaact tcacttacac aatcaaaatc cctcactctt tctttagaaa  
41761 aaaatataat atgactTTTga ggggtgttGct ttttataagc gctaagaata gaacgcatct  
41821 gctcaagatc aaatttaatc aattcataat caagcaatac taaacgataa gcttcctTTTt  
41881 ttagtctctt ttttaattcg ctaaaagaat ttacacgcat atTTTgagag cattgtTTTt  
41941 ctatgatatt gaaaaacaaa gttgcatcaa actcattTTg tttaaaaagc aaaacattat  
42001 tttgataagg agtttgaaat tttaaaacac aaatTTTatc aagttttctt tgcaaaatag  
42061 tttcaagctc ttttttttca aaaggcaagc ttaaaaaata ctcataatat aagtttttac  
42121 tacgcccaa cacgataaaa tcatcgGCct ttttagaact ttgctctaaa atTTTatcct  
42181 taatgaaaac cacatgaaaa tcattaatat caaaactcaa gctctTaaa atagtatttt  
42241 ctataccaaa ataagacaat aaattggcta gcaaaaatga ctcaagctca tcatcgctta  
42301 ctattgcagc acttgcttca aattgcaaaa cattaccctg tgctactcct atgctTTTtat  
42361 ggtattctaa ggcttgatta agtccaagtc taatttgTtc tttttgatgt tttaatgcat  
42421 ttaaaacgag tgatttgatt tctctacttg ctctctcctc atctaaacat cttacaacac  
42481 cctcgatatt gccaatTTGta tataaactat ctctagcaa ttttgCGtaa gtttctTTTt  
42541 catgagaaat cttgaacaag tcttgattta aatgtgctat tttttccgga atcaaatcca  
42601 aactcgtttc gatatctatc tctttagaat gtataaattc atTTTtaatt aataaaattt  
42661 tttgatcttt cttagccaaa gctcGctttt gccaaaaaag gaaaaatatt aaagttaaag  
42721 ataaaataaa aatactagca aaaaaagcaa gtttaatttg ctcaaaactt tcatgaattc  
42781 ttgcaaagtc tatactTaaa aaagccaaaa taatattaaa aataaaaata atccaaacca  
42841 ataacaaatc aatcttctt tttttttgC gctgattttt ttctactaa ttggcGcaat  
42901 tcttcaaaat ttgcctcata aatagcttca aaacttccat aatacgcaa aagtttttGt  
42961 ataattcccg aactaagccc taattttgca agcttagagc ttgataaatc ttgttttttc  
43021 ttagtatttt gatgaaaact tatggcaaaa cgatgtgctt catctctTaa tttctgtaag  
43081 aattgtaatt ttttatcgTt aatacttagg gcaaatctc cttttaagga atgaattttg  
43141 tctttagccc ctcttttagc acgatgagct ttagcatcga tttttcttt tgagattgct  
43201 aaaatatcaa catttgcccc gctactTaa atgatttctt tagctaaatc aagcaaagcc  
43261 tttccccctg ctataagcca caaatcagga gcaggcattt tatcaaaatc taatgcctta  
43321 cgCGtTaaa cttcGcgcat ttgctcatag tcatttttat atTTTaaatg aaattttcta  
43381 taatttgact tatcccaagc acccattTTa taagctacca tagctcctac attcGccaca  
43441 cttgcatat gagaattatc aaaaacctct atataatttg gcaaatTTTc aagctcaaaa

43501 taathttttaa gttctttttg tatattaaaa tcactathttt tttgctcttt ttgtatattt  
43561 aaacacgcat tttgaaatgc caaatcgcaa attcttcttt tttctcctat tttaggaacc  
43621 ttaatactga tttttttatc aaatctttgg cttaaaattt cttctaaaag ctccctatct  
43681 tcaaattctt cataaacata aatagtattt gtaaccaagg gaatgtctat gctaaaattt  
43741 tctaaaataa gttgtttata aatctcattt ttatcaaaat ctgtattatt ttttaagtggg  
43801 gtgatttttag aattggcact gatgattttt ccathtttgca cgacaaaacg caaagttgaa  
43861 agcatagagc tttcacaagc taaagcaaaa athtcaaagt cttctaattt agcgatatca  
43921 atctcaactt taathttcaa atcccttatc gtagcaatct gatctcttat ttttgccgct  
43981 tcttcataat tctcattttg agctaaatga aacattttgtt tttccaaatt tttcactaaa  
44041 atactagggc ttaaaagggc attaatggct ttatctaaaa tcaaacgata ttcttcttga  
44101 gtgatttttt tatcacaagg tgcaagacag cgagaaattt ggtaaaaaat acaaggggat  
44161 ttacaacttg ctttttgttt taatggataa tacaataaa gtgcatctaa aagctctcta  
44221 gctcctttaa aaaagggacc aaaatattta athtttactct tttttactaa ttttctagtg  
44281 athtcaaaac gcgggaattc ttcattaaaa tctacataaa tataaggata agtcttatca  
44341 tctcttagta aaatattgta ttttgatga agttgcttga taaaagaatt ttccaaaatc  
44401 aaagcatcag cttctgaatt tgtcgtata aattccaaat gcaactgctt ttctatcatt  
44461 ttttgaattc ttaagaatt ttttgggtta gcatgcaaat tcggagtaaa agcaaaaata  
44521 gatcttacgc ggtttttaag athttttagcc ttgcctacat ataaaagttt tccttcggcg  
44581 ttaaaatact gatagactcc agcatttgaa ggtagagttt gaagctctt tttgagagtg  
44641 tttttaagca aaathtcagt cattttttat catttgcctt athtcttcaa athtctttgc  
44701 taaaathtta ttttcaattt tgttttcaaa ttttccaagg ctttaattcta tgtagggtt  
44761 ttttagccgtg aaathttcat tattttttat tgtattgtta tatttttggt taaaaathtt  
44821 taaatcthtt atatctgaaa atccactcaa aggatacatt tttccgtatt tttttatgag  
44881 aacthtaatg taaathttgct tattatcgtg athttaattct tggtaagcgg ctgaathtaa  
44941 agtcaactata tttaaaatat gattttttat ataaaattcta gcgattaaac gctgthttggc  
45001 aggcggaaaa gaathttaaaa aatcthttaca aaaaaataag gtttttaagg gtcgataatg  
45061 agacttactc atcaagctat taagaatggc gctagtattt ttaattatct ttggactttg  
45121 aaathtttcc ataagatgat ttttagcattt tttttcttaa tttttttgtg tgcttgtggc  
45181 tataagggtta acccacaata cactagctac gaacaaaacg gttcagtaaa aaacattaaa  
45241 aaatacgaac aathtaatag gtggtagaat gaaaaaagca gatatttttag ttttgattt  
45301 tggatcgcaa tatactcagc ttatagcaag aagattgaga gagcaaggcg tttatgctga  
45361 gattttgcct tttaatgtaa gtttagcaga tataaaagca aaagaaccta agggattat  
45421 ttttaagttg ggccctgcaa gtgthttatgc aacagatgcg tacttttggt ataaagaagt  
45481 ttttaactta ggcttaccga tacttggaat ttgctatggt atgcagctta tggctcatca  
45541 ctataaagcc aatgthtgcct cagctggaca caaagaatac ggcaaagcaa gtatagaaat  
45601 tcaaaaagat agtgattttg ttaaaaatct acctaaaaaa caaatcgtht ggatgagtca  
45661 ttctgataag gttgaaaatt taccacaagg ttttgaagtt ttagcaacga gtgaaaatag  
45721 cccgtattgt gtttttgcaa atgaagagaa aaaattcttt gcthttacaat tccaccctga  
45781 agtgcagcac agcgaatttg gtaaaagtat cttgaaaaat tttgcaaaat atgcttgcaa  
45841 ttgcgaaagt athtggaata tgggatcttt tgcaaaaact caagctgaaa aaathtcgca  
45901 agaagttggc aatgataaag ttctttgtgc tgtaagtgga ggggtagata gcagtgctgt  
45961 agcagccttg ctagcaaatg cgatcaaaga tcaagttata gtagthtttg tagataatgg  
46021 acthttaaga agtggtgaaa aagaacaagt tgaathtatg tttaaaaata ctttaggaat  
46081 taatcttata agtattgatg cgagcaagat tttcttagat cgcttagcag gagtaactga  
46141 ccctgagcaa aaacgcaaaa tcataggcaa taccttcata gaagthtttg aagaagaggc  
46201 taaaaagcat aaagatgtga aathttttagc ccaaggcacg ctttatactg atatcataga  
46261 aagctcggtt ataggtgcaa gtaaaactat caaaagtcac cacaatgtgg gcgattgccc  
46321 tgaaaagatg aatcttaagc ttgttgaacc athtaaaagaa athttttaag atgaagtgcg  
46381 tgccttaggt atcgagcttg gattaagcaa agaaatagtt tatcgccatc ctttccagg  
46441 ccctggtctt gctatacgca tcatgggaga agtcaatcgc ccaagccttg aattattacg  
46501 taaagcggat gttatcttgc ttgaagaatt aagaagtaca ggttggtatg ataaaacttg  
46561 gcaagcthtt tgtgtattgt taaatgtaaa aagtgttggc gttatgggag ataaccgaac  
46621 ttatgataat actgthttgcg ttcgcgttgt tgatgcaagc gatggaatga cagcgactht  
46681 ttcacatata ctttatgaaa ttttagaaaa tatctcgcgt cgtattatca atgaggttga



46741 aggcattaac cgcgtagttt atgatatctc aagtaaacca cctgcaacca tagaatggga  
46801 ataaagtaaa aaatctgaaa acctgataat gatacacagg ttttcaagaa tttaaatctt  
46861 ctttagcgaa tttttaatac ttaaaaaagt caacatgcaa agcatgaaaa aaggctatat  
46921 caagcgtatt ggttttattt tataaaaaaa atcaaaaaat gttataagtt ttgagggata  
46981 tacagatgga aaatagtata aaagattcgt acaataaaat ttgtaaaaag tggagtgatt  
47041 ttcgaaaaag cacttcaacc aataaatgca ttattgattt tgcgaatgat ttgaagtcaa  
47101 attcaagagt gctagatatt ggttgtggaa caggatatcc tattgcttcg tatttatcaa  
47161 aacaaggttt tcaagttact gggatagata tttcagaaga aatgataaaa caagcacaaa  
47221 aacttaactt acataatgct acttttttag tagagaatat tttaaatttc aaaacagata  
47281 aaaaatatga tgcaatcatc gcatttgatt ctatttggca tattagtac gataagcaag  
47341 aatgtatcta tcaaatcatt tcttctttgt tgacacctgg tggattgttt ttatttacc  
47401 atggaaaaaa tgatggcgaa attatcagca caatgtgggg agaatcattt taccatagcg  
47461 ctctagattt agaaaaagta cataaattat taaagcaaaa cggatttgat atcttatctt  
47521 ccatagaaga ttatatagaa gaaactacgg gtgatcgaga attgctcatt attgctaaaa  
47581 agaaagaatt atgatatagc tttacttaaa agaagtaatc tagagcaatt accaagctta  
47641 gcccaaattt taaaaaatcc aaatgcaatg tatgcgttct aggataatct catatcataa  
47701 agcgttaaat ttttttttag caaaaaatgg gtgtaaaatt ttttcttac aataatacac  
47761 cacagcaggt gggaaatttt gccaaacaac tcttgaaatt cttacctctg aaaaaaaga  
47821 aaatatcttt tgacggaatt ttaaacttga aaaagtaggc aatacataag caaaagtact  
47881 aaaataacca ttgggtttta agcttttatg aatgattttt aaaagctttt cttgctcatg  
47941 atctttaagc aaactccacg gaattccact aacaatcaca tctgcattag ctatacttct  
48001 ttgccttaaa aaataaggta aattttcagc acttcttatt tctatatcca aatttgaat  
48061 ttttctttta agtttctctg ccatattttt attgatttct atagcaaaaa attgctcttt  
48121 tttgttttta ttttttaaaa tttttccgt aaaaacacct gtgccaggtc caatttctac  
48181 gatatagtct gcttgacgta aattaatatt ttgagtcata acaaaacctt gtttttggga  
48241 gctagagcaa aaggcaccga tttgttttgg atttttgaga tattcataaa aaaacattca  
48301 atttttccta tagtaaaaaa tataactaaa aaaattttta aatcaaaaa tgcgatttta  
48361 tccttttgct tataaaattt ttataaaaaa aaagctaaaa ttatctttta aaaactttca  
48421 aggatgaaat atgcatggaa aaatagctat atatatggat tccacagggc gtggaactgt  
48481 aacaaattcg gcaataactt tttttgactt tagtcgtcaa atttggaatg ataagaaaag  
48541 tatgcccagt gttgggatgc ttgttgaatt tcgcacgctc tctagtgata aaaaagccga  
48601 aaatggcgct cctgcacctg taagcaaaac tatcacaggg ataaaaacct ccaatttca  
48661 agaatttaaa gagggtgatt ttatcactga acatgatttt tggaaaaccg atagcgatga  
48721 tgagcttgaa gatttataaa attctcgaag aagtgcataat attacagaac tttatagaag  
48781 cattgatttt gattctatag aaaaaattcc attatctttt accattcctc aagctataca  
48841 aaaatatttt gcccatgaaa ttttatctgt tgaagctttg caagctaatt tacaagatga  
48901 aaaagatatt ccttgtattt tggattatct tatccttaaa agatttttat ttaaagctta  
48961 tgatacttta atttttatgg ataatagcat agatcaaacc caatttagcg ctttaaaaag  
49021 cattatgatg cacttagaaa attcttataa acaaatgata gcagataaaa aaccaatat  
49081 cactaaaata tttaatgaaa ctttcttatac ttacaatgt cattaccaag ctttaatagc  
49141 taccatagat acaagaaaaa accgccttgc ttcacttgag gcacaaatga aagctttaca  
49201 atctgaaatt caactcaaaa gcaatgcggc caatacagat cctgaaaaac tcaaagcaag  
49261 acaagaaaaa ttagcaaaac ttcaaaaaga agcggagtat tatagaacaa cccttaaaag  
49321 actgggtgct atacaagagg atttttataa gaaaaattat aatatttttg aaaatgcttt  
49381 caaactttca cgcgaaaaac tcttttaaaa aataattaca ggtcttaatt tatgtgctac  
49441 gataatggat gttaaaattt ggcatttatc cttaaaatca tcaggggtta aaaattcata  
49501 ttttacaatg agcaatatag aaaattcctt ttgttctctt tcatttgcag aacattatct  
49561 aagtcgttta aacaaagcag cactcaatcc ttttgatcaa aaacttttag tttatatcca  
49621 aaaaattacc aaagaacaaa gaaaaaatt tttagtctgta acttcggatt tggatttgc  
49681 ttgcaaatta aaaatagaaa cctttgcaca aaatccctat ttcatagtaa aatacgtcc  
49741 taaaaaagtc aattatcaat ccttaatgcg tgataatagt tttgatatag tttttattga  
49801 tgaaaagcat gtatgggaaa gtgtagcgga tattatttta gaaggaaaac attttgataa  
49861 aatagggaaa accaaattta aactgattta aacatagaat ttttaagctaa ataaagctat  
49921 aatttacttg cctaaacagt tcgtgatatt taaagtgatc caacatattt ttattaactg

49981 tgattgtgcg atttaccgtg ttctgtggcg tcgtttgagt ttcgaaagaa gcgagaagtt  
50041 gcagccttta aaaattgcct agcggttttc tttgactttt tgggggtcaat ctttattaag  
50101 cggctgtttg ggtttgatac aaggagaata aatgaaaata atgatttttg gtagcggcgc  
50161 tcgtgaatat tctatcgctt tagctctaaa gcgtgtggat gaaaatttag aattttattt  
50221 tgctcctggg aatggtgcta ccgaaagtct tggaaaccaat cttacttta aagatcctgt  
50281 agtttttagct acttatgcaa aagagaaaga ttttgatcta tgcatagtag gtagtgaaag  
50341 ttttttagct gaaggcattg tagatatatt taaacaacac aatattccta tttttggccc  
50401 tacaaaagct gcggctatgc ttgaaacttc taagtctttt atgaaaagtt ttttaaaaaa  
50461 ataccgtatc aaaacggcaa aatttttaaa taaaaacgat atagaaaaag caaaaaactt  
50521 tatattaagc ttaacgcctc ctattgtcgt taaagccgat gggctttgtg ctggcaaagg  
50581 ggtaatcatt gcaaaaacc atgaagaagc tatagaagaa gcatctaaaa tgcttagtgg  
50641 agaaagtttt ggtgaagcag gcaagcttat tgtgatagaa gaatttttag atggttttga  
50701 gcttagtatt tttgcagtat gcgatggtaa tgactttgtg cttttacctg ctgcacaaga  
50761 tcataaaaaa ctttttagat gagacgaagg accaaatata ggtggtatgg gggcatacgc  
50821 tccaagctcc ttagcaaatg aaagcttgct tagaaaaata caaaaagata tcattatccc  
50881 aactcttgca ggtatgaaaa aagaagatag tgaattttgc ggggtattgt ttataggat  
50941 tatggttgta ggtaacaac cttatgtttt ggaatttaat gtgcgttttg gagatcctga  
51001 atgcgaagtt ttaatgcctt tgattgaaaa tcctctagag cttatttttag ccactacgca  
51061 aaaacgatta agacacacta aaataaaaaat caaaaaagac tatgcagtag gtgtagtatg  
51121 tgcgagcgag aattaccctt acaaaagctc tccaaaaagt gaaatttcta taacaaatat  
51181 tcctgaaaaat acacatatatt cttatgctgg agtaagctta gaagatggca aacttatggc  
51241 agatgggtggg cgtgtattag tttgcgttgg tacaggttca agcatagaag aagcacagaa  
51301 aaaagcttac gagccttgcg agaatgttca ttttaagga aaacaattta gaaaagatat  
51361 tgctcatcag gttattcaat gaaagaagat ttgcttacgc gtcttgagcg agaaaaatctt  
51421 accattgcta gctttaacaa aaggatattg gcgtacttta ttgataatct tgtactttcg  
51481 ctgattgtat ttgttatatt ttacgacaaa ttgcttaatg ctaaagattt gtttgataca  
51541 gctcaaattt taggtgattt ttacttagga tttttattgc ttcataattac ctaccaaaaa  
51601 atttttactt atttatatgg agcaagttta ggaaaaatgg tatgcaaaat cattatttta  
51661 gatgaagatt tattagacaa gcccaattta aaccaaagct gcatacgtc aatcgtaaga  
51721 caaataagcg atatggcatt tatgttaggc tttgcttggg ctttgagcaa tgatttacgc  
51781 aaaacttggg aagattatct agcaaggaca atagtagtta atgtggcgta aaattttatt  
51841 ttttaagcgt agccttacct tactcgatgc cgcccaagtg gatatttatg cacttgatgc  
51901 taaaaaacia ggagatatac tctactgcaa tgaagatgta gttatttttt cagactttta  
51961 ttttatcact gccataaag ctatttacia tgaaaaaacc ggagatttag aactttttgg  
52021 tgatgtaa atattaagag gtcaaaatga acgctctcat tctaactacg ctaaaatcaa  
52081 tttaaattca aacaaggcca attttaacia tttcttctt tctaataata atctagaagt  
52141 atggtttcaa agcaaaacia gctatttaga tgaaaatatt ttcaaaagcg aaatttcagc  
52201 tgtttcaagt tgcaatgttg aagatcctga ttgggaaatt cgcttttctg aaggatggct  
52261 caatagggaa aataattttg tccatttata taatgccaaag ctatatgtta aagattttcc  
52321 tgtattttat ttgccttatt ttggctttag tgcggatact catcgccaaa gtggactttt  
52381 aatcccaaag atagtcttaa aaaacagcga gggtttatat tatgagcagc ctatttatat  
52441 agcgccttat gaaaattggg atctagaatt aaatcctcaa atcagaacca atcgtggcctt  
52501 tggactttac tccaccttaa gatttgttga ttctccttat tccatgggag aggtaaattt  
52561 aggagccttt agggaaaatt catcctatta tcatgatgaa aatttaaaaa atcaaagtca  
52621 ttatgggtgca gaattaaaat atgctagaaa tgatttaatt aaaactttac tgggtgataa  
52681 ttttcaagaa ggcttatggg tagatgctac ctatcttaat gatatagatt atcttaattt  
52741 tggcagtagg gattatcgtg attttaaattc attggttact tcaaaaatca attattttct  
52801 agcagatgaa aataattatt atggggctta tgcaaagtat tatatcgata cttctgcatt  
52861 aaataacgat aataccctac aagaatacc aagctttcaa tatcatcgct ttttaataa  
52921 cttttttgat gaacgcttgc gttattcttt tgatgcatct tttcataatt tttatcgctc  
52981 cgtaggccct tatgcaaatc aactgaattt aaatttgctt atttcttacc ataagtcttt  
53041 ttttgatgat ttcttacatt ttacttttac tgaacgcttt tatgcttcat ttttaatta  
53101 tagtcattat cctgaaaaag agcatgaaca ttattttaga aatacacatg attttaattt  
53161 ttatactgat ttatctaaag catatgataa tttttttcac actcttaatt ttggttttag

53221 gtatattcctt ccaggagcca aatcaggaag tatttcggag gattatcttg aagaatccaa  
53281 caaagaagaa gaacactttg gcctttatac tactcaatac ttttacaata atgaaggcca  
53341 aaaaaaaatc aaacatagac ttaatatgga ttattttaaac aagcaaggca gttttgatga  
53401 aataagcaat ttattaagtt attattataa taacaacatc agttttaata gtgagattgt  
53461 ttactctgat cttcaagatc gttttacaaa tatcatcagt caaatggaaa tcaaacctaa  
53521 ttctaaattht aattggagct tttcgcacgc ctatcaaaat gatgagtatg gaaaatatag  
53581 ctttataggt actcgtgcga attaccttgc tagtgcaaat tatcatttat ttggaggaat  
53641 ttggtttgat acccaaagag cacatgctaa tatgtgggaa cttggatata cttttcaacg  
53701 caaatgttgg aattattcctt taatgtatag agaaagaatt gatccgcaac ttacaagtgc  
53761 gggattact gctaaaaatc aaagcggat ttattttatt ttttaacttct atcctttagg  
53821 tggagttaaa tacgattttt ctttagcaga aacggagagt aaaatthaaa attaaaggaat  
53881 gagatttgct aatattttt aaaagtttga caaatthatt atatggaaaa aaaggacaaa  
53941 ttatgcaata cagtatagaa ataatggta atthagaagt atthgatata gaaaaagtag  
54001 ctaacaagc tgcaggtgct gtacttatgc gacaaggaaa aagtgtcgtt ttagctacag  
54061 ttgcaagaga agaaaagcct gttgaagaag actttttacc tctaactgtt cagtatatag  
54121 aaaaagcgtg tgcagcagga aaaatcccag gtggttatgt taaaagagaa actaaaccaa  
54181 gcgatgcaga aaccttaact gcacgcata tagacagaag cttgcgtccg ctttttcaa  
54241 aaggatatgc ttaccaact caaatgtcgt taatggttct ttctgctgat ccacaagttg  
54301 atctacaagt tatgagtcta aatgcagcaa gcgtagcact ttatcttagc gatattccta  
54361 tgaaagctcc tgtttgtgga gttcgcatag gacgcataga agaaaaattht gtcctaaatc  
54421 caacaatga agagctthaa aatagcacc ttgatcttht tgtagcaggg gthaaagatg  
54481 aactthtaat gatagaaatg cgtgctthac ctaatcaaaa agaagatgaa atctthtctg  
54541 aagcacctta tgcagatgtht ttaactcaaa caacttcaca aagcatgaaat gaacttagcg  
54601 aagatgaaat thtagaagca ctaagcctag ctcaaaaagc tatatthaaat ggctctaatg  
54661 cttacgaaga agctthtttg aacataaaa aatcaagcga thtaaatthc aaagatgaaa  
54721 tagaaaattht cgaactthct gctthttatag aaaataattht tcacgatcaa atcgcacaag  
54781 ctatcaatca aatggcaaaa agtgaaagag cgagcgaatt aataaaaattht gctgaaaaaa  
54841 tathaaattht tgaaagcgc acaaaatggg atgaagaaag caththaaattht gctthtagcaa  
54901 aagtcaaca thaaatcgtt cgtagccaaa ththaaatc aaaaaaaaga gcggatggta  
54961 gaaatthaaa tgaagtgcgt cctatcaca tagaaacaaa ththttacct aatgcacatg  
55021 gctcttgctt thttacacgc ggacaaacc aagctthtagt tgtagcgact thaggcagtg  
55081 aaaatgatgc gcaaatggtht gatgtgthta ccgaaaaaaa tcctatcaat gaacgcttht  
55141 tggthtaatta thattthtcca ggctthttcag taggcgaagc aagtcctatc aaagcacctg  
55201 gaagaagaga attaggacat ggaaatthtag ccaaagagc cthttatcca agcatagatg  
55261 aaaatthtcc thtatgthtct cgtthtgthta gtgaaattht agaaagcaat ggctctagct  
55321 ctatggcaac ggtthtgthgt ggatctthtag cthtaagagc agcaggagtg cctagctthaa  
55381 aacttgtagc aggggtagct atggggctta thtttgaaagg cgatcaatat gctaththttaa  
55441 ctgatatcat gggctthtaga gatcatgatg gggatathgga ththtaaagta gcaggtagta  
55501 aagacggtat cacagcttht caaatggata tcaaatggg cggtathgat caaaaaatc  
55561 tcaagaagc cttatatcaa gccaaagaag gtagaatcca tatctthaaac atcatggaag  
55621 aagcactthaa agaaatgtht gthaatgaag aggtgthtacc aaaactcgag cthttcaatg  
55681 ttgatccttc aaaaatagtc gatatcatag gccaaagctgg aaaaactatc aaagaaatta  
55741 ttgaaaaattht tggthgtthtct atagatthtag atcgtgaaaa gggthgaagta aaaatthcgg  
55801 gcaatgaaaa cgaacaaatc aaagctgcaa aagattatat tatcaatatc acaagctctc  
55861 aaaaaaataa caaaagaggc ththaaagaaa aagatctatc agactthgaa ataggcgaag  
55921 aatthgaaagg aaaagtcaaa aaaatcacga atthttggagc cthttatagaa cthtaaaatg  
55981 gaatthgatg cttgctthcat aatthtcaaaa gthaaaaatct caatthtaagc gaaaatcaaa  
56041 ththtaaaagt aaaagthagt gagatthaaa atggthaaaat ctctgtggat thtatgagat  
56101 gagthgatht thtaactcatc cththtaaac cththttgat aaggatthcta aaatthttgat  
56161 thtaggatct thtctthcag thtaaatcaag agaagatgga thttactatc agcatccaag  
56221 aatcgtthtt tggcctatat tagaaacact thttgatata agatthgaaa atatacaaaa  
56281 acaacaagcg thththaaag aaaaaaatat cgccctthgg gatgtgcttc aaagctgtaa  
56341 gaththaaat thcagatgata aaaccataag thacgcaaag gctaatgatt thaaatthaat  
56401 cthttctcaa gcacagatcc aagctathtt taccacagga aaaagthctt accaathttt

56461 cactaaatth catcctcatt taaaagccat agccctaccc tcaagctctc ctgcaaatth  
56521 aaatthttct tttgaacaac ttttgcaaag ctataaaata attaaaaatt ttataaaata  
56581 atthtttgatt acgtatgtaa aaaataccca aaagcatata taaaaataaa attatthtcac  
56641 aaaaaagtaa tacatataaa aacacacctt cgcatataaa aacataaatt caaaaaaga  
56701 caaataaaaa taaagctaaa gttcctaaaa acaatthtaga aagatctthta gcacaaaaaa  
56761 tcatataaatt tataaaaaaa tcaaacatth taagatthtat gatattcttht gcaaagtcta  
56821 tthtttgctag cttctattaa taatthcattt ttactagcac aagthtttatc tccaactcct  
56881 ggtgcattthg ctataccaag tcccattcca aacatccaag caaaaggtac acctctthct  
56941 tgtthtttgct ccaaataatc gcaaaaaaag cattagcact accatacaac aacatcgthc  
57001 caaaaaaac atgcaataat thttatacata taagcctctt thtaaggaat gthttgtatc  
57061 aaattataat cttgtaatat taattatcaa aataatthtt ataaaaaatg agctthttcta  
57121 ataagctthgt attaatgtht tctatthtaa atgattaaaa aatataaagg agthtttaaat  
57181 gcctthttgta aatatacgca ttactaaaga aaacggcgag cctacaaacg acaaaaaaca  
57241 agaacttatc gcaggagtaa cggatthtact cgctagggtt thaaataaaa acaaagcctc  
57301 aaccgtagta atcattgatg aaatcgatac agacaattac ggcttaggtg gaaaaagtat  
57361 cacccaagta agaaaagaaa aaagctagtht tatacttagc thttgagtat tgtctthtaa  
57421 thcaaactct acctthtttg ctccaaaacc thtggtata gctthctaaag tatctctagc  
57481 gctthttgta atthttactth ctaaathttct aataagatth aatgacaatt cthtaacctc  
57541 thctthtagct tctcttatga gctthtttht gctatthttca ctaaagctaa gtcctgtgct  
57601 attaatagaa tcaggcgca aaaaaggcaa aaatthtagca thttthtcat cataaaatth  
57661 catatctata atgctgtgct tgtatthtaca thcaggcata atgatcttht aatgatcatt  
57721 atctaaaact acaatthtga aatthttatc thtthaaatcg tacaaaaatg taatctcaa  
57781 thcaaaaatc aaagcaatct gctthttcgct thaaagacaa ccaaaaatac thttccaaat  
57841 tccgtthaaa gcactatctt thtttagtaac aatthctthta cthaaatactt gaaaaacact  
57901 gagthtctct atggatthta gctgggtaat atcattgcta atatgaatat cthtctcttc  
57961 tgtthttagaa ctatthttta actgcttht atgatgacaaat acaagcaaaa thacaatcaa  
58021 actaagtaaa atgagthtcca thaaatcac thtcthaatt athaacctg attagaaaa  
58081 atataatthc thtcaaatat caaaaaaatt atagcattta aataaaaaat acagcaata  
58141 aaagcaaaaa caagthtctac acthaaatgc gctgttatca atctctctc ahaagcaccg  
58201 caaaaatthc thaaaaactg acaagthtga thhaaacca atacaaggct thaatthttta  
58261 gactaacac cthttthtaag caaagcattc acacaaggca aaagcctc aagcctatt  
58321 cctataagca atctthacaa aataagtgca thaacatthg tagcthaagga thgtaaata  
58381 ahaaaatthc cahaaatat caaagcacca ahaataatct tactagggcc gattthtatct  
58441 gctatthttc caagthtggg cgcaagaaa agattactaa thccgctthg agccacaacc  
58501 acaccgccc aaagagctaa atthccacct tgataaattt gthtctacata aagactthaa  
58561 ataggcatta ccaaaaagt thcaaactga athaataaag thgtgatgaa aataataaca  
58621 athagthttt thttthcctt aatthctthg atattcttht thgtctctth thgaatthtt  
58681 ctctcacgaa thaaaagaaa aatthgtcaca ahaagaacaag caagcaaaaa ggctaccaag  
58741 thcaaaaacag cacthaatct ahaaathttc gccacaactc cgcahaataa aggaccaat  
58801 aactcccac tgatagatgc agtagaaagc gtaccthaagg chtaagctac thttctthtg  
58861 ggtgctatta cagcaataaa aacaacagct gctgcggtaa atctgatac aatgcctgth  
58921 aaacctcgta thaaaaccac thcatagca thcatgggcaa aacthaagca cagcgthtaa  
58981 gctgacattc caagctthgc thgaagtagc atatthttat agcctgattt tgcacccaaa  
59041 tatgcccaca agggcgaaaa aatagccatt ccaagcggth taatthcaaa agcthaatct  
59101 gagthaaaatg cgatthtcgct agtatthtga tgtcctaatt cthtgatata thaaaggcaag  
59161 atthggagcga thttggcthaag thccatactt gtagthaaata cgcahaacca acataccat  
59221 aaagthctat thgaatthttc catahaatta thgtatgata thttthataa thttcaatta  
59281 aatthcaagg atghaaatga ahaagatagth thttgtatgt cthtgaaata thttgtcgttc  
59341 cccatggct gaatthgtta thgaagatct cathaahaag gcaactthg ahaagaatth  
59401 thttgthaac agthgcaggaa cctcaggaga gcatgatgga ghaaatatgc actatggcac  
59461 thcahaataaa ctcahaagct thgatataaa atathcaaat ththacaagca ahaactcac  
59521 thcaagthctt thgtgatgaaa gthgatthttt aatthactatg gataatthca atthcaagaa  
59581 thgtthcaaaa aatthataaaa atathcaaaa thaaactthta ahaatcactg atthtgcttc  
59641 thcatthtaga thatgatgaag thctctgatcc atggthtagth gggaatthttg atghaaactta

59701 tcaaatcatt tcttttagcgt gtaaaaatct tttaaatcat ctacaaaaat aaattattta  
59761 tctttgcagt atttaaatat atatctttct aacatagagg aatttccaga aattcctcct  
59821 tgatggatat aaagcaaggg atttttccat tctcttttta aggctatact caatcctagc  
59881 atatcataaa gtaaatcaaa ttctactaga cattcttggt ttaaactctt ataaagctga  
59941 taaaattcta aataaggttt accaaaatga tattttttat cacttttttag aatttctaaa  
60001 ttcgaaaaat cataattttt aataagattt aaaatttgag ttttaaggta gtactcatct  
60061 ccaacgcaag cacaagtaaa aactttaaat ttggaatttt tagctaaaaa tgcagccgaa  
60121 gttcccgtgc ctgagggtag aaaaatatca aaatctaaac ctaaagtttt actttgactt  
60181 tctatttcct tggccagttg aatataacct aattcggcat ttaaattagc aactccttgc  
60241 tctataaaaa tatcatcttt ttcacacaaa gaaagcgcaa atgtttttta gtctttattg  
60301 ctgtgatttt cgataaaata aacattgttt tctaaggcta atttataatt tccacaagga  
60361 ctatttctta gataggtagg aatcttttca caagcataaa caagaatcaa atttctttta  
60421 gtcgcaaaata tactaagtgc taccaaagca ttaccttgaa tgccaccata acttataaag  
60481 cgttgacctt gatcatagtt ttgagaaaga taaaaagcaa gttttctagc tttgtttcca  
60541 ttgatttctc cttagcaaat atcacgcttg atataaaatt caaatccttg aaattgaatt  
60601 ttttctatgg gagaaactaa cattttaaact tcttaacgaa attcaaaaaa cttttcaaca  
60661 tcttttaaaag cattgtcatt ttttaatactg aatttaactt ctatgctggc gcttttatct  
60721 ttatcctcta cccattaac aagaacagga tcagaaaacg atctaccact tgccatcaaa  
60781 agtttttgca acctgtatc cttataaaaa gtatagataa aattcattac ctcataagcg  
60841 cgtttttgag ataaatcaag attataaata taagatccat cactatctgt atgtccttcg  
60901 atgatgatat tttctatggt agataaaatc tttggatcat tgatgatagc attaaaatac  
60961 tcacttaaaa tttttcttaa actcgccttg gcttcatttt taagcgtgta agaactttta  
61021 tcaaataata cctcagaagg tagagaaatg gatcctgttt tttgatctat ggtaatatg  
61081 ctatcaagtt tagcttgcaa ttctttgctt aaattctcgc gaatcaaaact taaattttga  
61141 accttttctt ttgccttgtc aaagctttct tgtaaatttc taatttcttc atctttcttt  
61201 tctagctgac ctaacaaaat caaaatttgc ttatctttac tatcgataga tgaattaagc  
61261 tctttactta attgttcata attagtata tttgcttcaa gttctgcttt ttgagaattt  
61321 ataagattta aagcacttga agcattatth aaatcagagc ttaattttaaa aacaatagct  
61381 tctttatthc taagctcttc tttactttct tctaagcgtg cttcttgttt gtttaagatta  
61441 tctttgattt ctcttagatc actttgagtt aaaacgtatt taactacaat agcacctatt  
61501 aacaggataa aaacaaaaag tagcccagcc atcaagtcag cataggctat ccaaaaatta  
61561 ccttcttctt gctcattttt catttatctt cttttcttc tttattaaaa tttttattag  
61621 aatctaaagt atcgctatcg ttttgatatt ctttagtttg ttctgtattt tcagttatct  
61681 tttcgcttga aagaatttca ttttctatat tatcttgctc ttcttgagta agactaggag  
61741 ttttacctat cttagccatc acttcatttg tttcttcatt taaattcttg atttcttgct  
61801 ttaatttatc catcattttg attttcgcat cgatactttt ttcttcctca taaacttctt  
61861 taaatttatg cataccctcg aaaagacttg tcttaaagcc ttcaaaaacc ttttcttgac  
61921 tttctaaaat agctttttca tataattcaa aatttttacc aaaacgatcc accttttcat  
61981 caaaagcaag caaagtctta tcaaaatgct gaattttttc attgctgata tcaagaagac  
62041 ggttatattg ctgagacatt cgcattttga tttcttttaa attttgatta agcattccta  
62101 taccatttag catttcacca tacatttttc caagatctct ttgatctctt tgtgccctgc  
62161 ttaactcgcc catagtttgc ttaatatgct cccactcaa tcttatagct ttttcttcta  
62221 cattgagcat atcttgaaaa attccaaatt ttctatctat agtatgatca agttctgcaa  
62281 aaaaatcttg attgcttact tgttttaaaa tagcaccgat tttttcaaaa tgttgcaagc  
62341 tttcactcaa atatctttga tcaagttctt cttttgtcca aaaaaatccg cttgtagaat  
62401 ttttttggcg atttaacaaa cgctcgatct tactctttcc aaatttttca aaaaacatcc  
62461 accaaagagc tagaaaaata ccataaattg aaacataaaa agcagtcctt acaccactta  
62521 gtaaaagagc gatctcttgc tctaaagccg ctgtatcact agagctaaaa ttaggcatag  
62581 ataatgctat actgataaag gttcctaaaa ttccatcat aggaaaaata gccgcaccaa  
62641 tactagcaaa attttcatc cttgaaccct taacataagc ataagcaaaa tcatcaaaac  
62701 tcgcattgga ttttgatctt ttacctatgg taagaaaaatg tttcataata tgtcttttta  
62761 aagcttgtht aaattcatct ttttgthttht caaaaatact atatgcatac tcagaactat  
62821 gccttgcaaa cacaagggct gtgaaaaaaa taaagcctat cataacaaca gtatgcaatt  
62881 cgactttgaa atttataata ttataataac ccaataaaat aaaaacataa agtaaagcag

62941 gtataaaaat aatTTTTTaa taaactaaat atcTTTTTTT ctctttactt tctggcagaa  
63001 tgagttctga aatTTTcatcc gatcttatat ccataacact aataccatcc tagctaaatt  
63061 ctatTTTTaa gattattatc aagaaattca aaaaatcttt aaaataaaat ttaggaagat  
63121 taagccaaag gcttaatttc ttcctataca atTTaaatct tcaaaagcaa gctctaaacg  
63181 ttttatcata ctttcctcac cgcttcttag ccaaacacgc ggatcgtagt atTTTTtatt  
63241 aggcttatca tgccttctg gattaccaat ttgaccttgt aaatatgcac gattctttgc  
63301 ttcatactca cgaactccat cccaaaatgc ccattgagta tctgtatcga tattcatttt  
63361 taccacacca taactcactg catctttgat atcttttagt tcacttccgc ttccaccatg  
63421 aaaaacaaa ttgatcggct tatcagcttc taggccaat ttttctttta caaatTTTTg  
63481 tgaatTTTTa agaatttcag gctgtaagct tacgttgctt ggTTTTataaa ctccatgcac  
63541 atttccaaag ctggctgcta ttgaaaattt atcgttgatt tttccaagtc tttcatatgc  
63601 aagtgtaca tcttcaggct gggTataaag tttagaatta tcaatacctg tattatccac  
63661 tccatcttct tctccaccgc tgcagccaag ttcaagttcg agtgaaattc ccaaagaatc  
63721 aagctTTTTa agatatgttt cgcaagtgc tagattgtct tctaaatcct cttcgctaag  
63781 atcaagcata tgagagctaa ataaagcctg tccatgggtt tttttatatt cagcatttgc  
63841 ttctataagc ccatctatcc aaggcaaaag ttttctagca gcatgatctg tatgcaaaat  
63901 cactgggata ccataagcct tagcaagcaa atgcacatgc ttagctccac taatcgtcc  
63961 taatacatca cttgtggac aatTTTTtcc tgcataaaat ttcgccctc cattagaaaa  
64021 ttggatgata acaggagaat ttactTTTTt agcagcttct aaaacagcat tgatcgaatc  
64081 agtccact acattaacag cagggatagc aaaaccctgt gttttagcgt attcataaac  
64141 tttattaagc tcatctccgc taacaacccc tgcttttacg atgtctaaca agcccattat  
64201 ttgtattcca ctttagcatt gtttaacaaa tcttgacctt tttgattgat cactTTTTta  
64261 aattcttcaa atttcaaacc attttcaatg cttTTTTta catcatcaa tttgatttgt  
64321 tcttttgac gagaattttc ttttaagatt acatggtaac caaaatttgt ttttacagga  
64381 gtagttgtaa tagtaccatt ttttaagtgc aatgctgcgt cagtaaaagg ttttaccatt  
64441 gttgattgat caaccaacc caatttcca cttgatttt ttgaacctgg atcgattgat  
64501 ttttcttag caagttgact gaatttatca tctaaagctt tgcctTTTTa acctttgagt  
64561 tctttaataa tatctttagc ctcttcctcg ctagatacta aaatgtgctt agcttgaact  
64621 gcagcagggt tgatatattt ttctttattt tgttcataaa atgctttaac tttagaagaa  
64681 tcaatTTTTa tagaattaag aatTTTTtct tgataaacat taataagtat gctatctttt  
64741 gcgcgttcta attctTTTTt ataaagagga tctTTTTcca aatTTTgttt tttagcatct  
64801 tgtagtatca aatcttgcat gatgtattgt tgtaaaagag cttTTTTttg atgatcaggc  
64861 aagctTTTTa aatcctctcc tctaagcatc ggtgcaaaaa attcactcac ttcagtatcg  
64921 cttatatttt taccatttac agtagctata gtagctgcat ttaaatttaa agctacacct  
64981 gcaattaaag ctgcggcaat taaagaaact tttctcattt tagacttctt tttttaataa  
65041 aatagattaa aatcaattat atctcaactt ggtttaaagc taattaatta aaataaaaaa  
65101 atgaaaagaa attcagaaat caaagaactt tttttaaac attttgacaa gcccaccaca  
65161 gaattaaagt tttcaaatct ttatgaactt ttagtctgtg tgatgctttc tgcgcaatgc  
65221 actgacaaa gggTTaatct tatcaccctt gagctTTTTa aagcttatcc tgatatcaca  
65281 agtcttgcaa atgcaaatat atcgagcctt aaaacttata tacaagctg ttctTTTTac  
65341 aataacaaag ctcaaatct catcaaatg gctcaatcag tctgtgaaaa tttcaatgcc  
65401 caaattccat tagaggaaga aaaattaaaa tccttagctg gagtaggaca aaaaacagcc  
65461 catgtgggtt tgattgaatg gtgcggtgca aactgcatgg cagtagatac tcatgttttt  
65521 cgtgtttctc atcgcttagg acttagcaag gccaaaactc ccgaagctac cgaagaggat  
65581 ttaacgcgca tatttaaaga taatcttaac tatctccatc aagctatggt gctTTTTggg  
65641 cgctatgttt gcaaggctaa aaaacccta tgcaaagaat gttttctaaa ccatctttgc  
65701 aaaagtaaag acaaggagct tgaatgaaat ttattatctt tttactagca tttacacttc  
65761 atgtTTTTgc tttagaggcc tataaacccg ataaagattt tgcactttat tttaatcctc  
65821 taaattgctc cgttgttttg gataaatTTt tttatatcaa ttgttatgat tataaactca  
65881 aaggcaccaa agccgtagct tataaggtag aagcgtctaa tctgaaagaa aaacagatca  
65941 aaaaacgagc tcgctttgaa gatgatacaa atatccctaa aaaataccgt agcacttgga  
66001 gtgattataa aaatagtggc tatacccgag ggcacatagc ttcaaatgct tcttttcgct  
66061 tcagtaaagc agcacaaca tcggtTTTTt taatgagcaa tatcactcca caaatgcac  
66121 aagttaacgc aacggtttgg aatgaaatcg aacaaagaga aagaagtctt gctTTTTaat

66181 ttcaaagtgt tgaagtgcta aatctaatac tttatggtaa aaatcctaaa ttcattaata  
66241 atggatcgc tataccgagt tcttatatta agatcatcaa aactcctcga tttaaagaat  
66301 gctatgaggt gccaaataac gatatccaaa gtgaagaaat caatgattat aaaatttctt  
66361 gcaataaatt ctaagggcta tcaatggaaa ttagtgcttt aactataact ataccttata  
66421 ttataggaat ttcagcagag ggcatgacag gtgctttggc tgcaggcaga cataaaatgg  
66481 atctttttgg agtaattttc atagcttttag taactgccat aggaggcgga agcatacgcg  
66541 atgtgctttt aggtcattat ccgcttactt gggttaaaca ccctgaatat attgttttaa  
66601 tttgcctttg tgctcttggt gctactaaaa ttccacgcat tgtagtaga ttagaaagtt  
66661 tatttttaac acttgatgcc atagggcttg tagtctttag catacttggg gcacaaattg  
66721 caatagaaca aaacctggc tttatcatcg caatctctgc agcagtgatc acaggtgttt  
66781 ttggtggaat tttaaagat attttatgta tgagaattcc tttagttttc caaaaagaaa  
66841 tttatgcagg aattgcaatc atagcagggg cgatttatta cgctttaatg gtttatcttc  
66901 aactgcatgc ttttaattgc acgcttgtaa cgctatttgt aggagttaca gcaagacttt  
66961 tagcaatcaa atatcaatgg tctttgccta ttttttcta taataggaa aaataatgaa  
67021 ttgtatttat aaaaatttgc taagataaaa agaagcgtga taaaagtta attatgcttt  
67081 ttaaggaaat actatgaata aagcaatact acttaccctt attggttttat tttttacagc  
67141 ttgtgaacaa accaaaagt tagaatatta caaagctcat cctgaagaag ccaaaaaag  
67201 aagtgatgaa tgtcgcttga aatctatcat cagtcaagat tgtgtaaatg ctcatagcgt  
67261 tgctatccca aaagaagatt gggatgaagg ccatgatata caacaagat aatttttatt  
67321 taaaggctat aaaggtttca aaattaacc acttaaaaac actttctatt tttcaaatc  
67381 ctgcattttt aagcatatct aaattttctt tttactata agggataaga acattttcca  
67441 aagcctccct tttggctgca atttcgattt tagaataacc ttgtctttct ttataatctg  
67501 cataaagttc tatcatattt ttagacaaaa aagcatcttc ataaagaatt ttttactca  
67561 tgataaaaaat accaccttg tttaaattct tataaatttc attaacaagt tcttgtcttt  
67621 taggcggacg aatgaattgc aaagtataat tagccacaaa tacatcactt tgaaaaaata  
67681 caaatcaca caattcgc tcaaaaaatt cgatatttaa gccataagct tgtgcttttg  
67741 atttggcgat ttcaagcata gaaggtgcat tatccacacc aaaaagctta agatcttttc  
67801 ttaagctggc taaaaaatt aaaaaattcg cactagaaca acccaaatca caaaccttta  
67861 ctccctcttt agtcaatttt tttatcaaat ttgcacaaag ttctaaattt tctttataaa  
67921 aaggcacaga gcggttaatc atatcatcaa aaacacttgc aacactctta tcaattcaa  
67981 attgtttggg taatttttct ttaaaaagtt catctttcat tctctatcct aaacacgctt  
68041 tagcttgatt tatatctttt gaaatttggt ctttaagttg ggcaagatcg ttaattttt  
68101 gattttctct tagaaattct acaaattcaa gctctaaaac ttcccctata gccaaagctt  
68161 catcaaattt ttctataata tgactttcta tggcaaattg catatcgcta gaacgcacgc  
68221 ctacaaaact tacgctctta tagcgtttat catgaaaact cacaatgcta gcataaactc  
68281 catttttagg taaaaaatat tcctcgcatt ctaaatttaa agttgcaaaa agctcttttg  
68341 agccaagtcc ttgacccttt ataagcttac ctttgattgc ataatttctg ccaaaaaagc  
68401 aatttgctt tttaatatca cccgtgtca aatactcttt aatcaagctt gcatgaacac  
68461 cactccacc taatctaaat tcatctataa tcgttgtttt aatcccgcta agtgcttcta  
68521 tatcttttgc tttatagctt ctattttttc caaaagaaaa atcaaacct acaactatac  
68581 gctccaaatt tacaatttc tcttttaaag cttgtaaaaa atccttacca tctaaggcct  
68641 tgatgctttc aaaatcaagt tctataatct ctttttgagc taggaatgct ttgtcttgat  
68701 tgggtgcaaag ctttttacc ttaaatttat cgataatcaa aagagcccc gaatcatcta  
68761 ggcaactctat aagcttttta tgccctaaat gaactccatc aaaacatcct atggctaagg  
68821 ttttaatat attttttagt gtagtagtaa aaatattcaa cattaccctc ttttctttg  
68881 attttagact cttcacaca ttgcaagatc caacctaac gcgcacaagc attttcaaat  
68941 tctctcatag ctttaaacac agccttttca tcttttaaaa caccctttt gtctctttt  
69001 gcttgcttac caacttcaa ttgggtttta aaaagcaaaa ctatatcctt taaagctaaa  
69061 ttatcaatat acgaaagcaa atgagttaaa gaaataaaac tgacatcaca agtgataaaa  
69121 tcaaattttt gttcgctttt aaaagttctt aaatccgtat tttcaataat ttcaatcctt  
69181 ttatcatcgc gtaaacatag atggagtga ttatcgcca catctaaagc gcttactttc  
69241 aaagccttgt gttctaataa aatttgcaca aaaccgccc tgcttgaacc tatatcaaga  
69301 caagttttat ttgctatatt gatattatga ttttctaaaa aatatttaag cttaaaagct  
69361 gcacgagaaa cataaagctc acccaaaagc tctaaattta attctttgga atttaaaagt

69421 tcttcttgat ctgctatctt gtttttaagc agattttgca catcaaaaga agctttataa  
69481 ggcttgagat taagcaaaat ttcttcattt tctatcaatt ctaaagcttt atttctgcta  
69541 agatttaaac gctttgctac aaaaatatca tatctcattg aagactttca ttttaaggatt  
69601 tttgtaattc ttctttatct ttagaaaacc accaaattcc tatttcgaag gcatttttat  
69661 ccaaaagttc ttgcaactgt ttttaagttt taactagtct atctttatca ttttgaagca  
69721 tacttaaatt ttgctctttt aaaaaagaaa gattattcat catcaaaaca agctcttttt  
69781 gataagcttt tggattttgg tttttatcct ctacgataaa aaatgaagct agagctacaa  
69841 aaaatgaaaa gacaaaaaca taagttttct tttttgcctt aaaagcaaaa ttataaagat  
69901 aggccacaaa ggagcaaaaa ataaaaaat taataaaatc aaaaataaaa tttaaaacc  
69961 taaacaaaaa aagaccaaa gaataaaaa aatactcttt taaagcattt ataagtgtta  
70021 aaatttgaga aattaaatca aaaacaaaaa actttgagtt tttataatga ataatacttt  
70081 gattaaaatc ttcaagatta aaactttgta taggatttac cactccatta aaaatcgcat  
70141 ataacaaagc taaaatcaaa cttgataaaa tgattattct aaaatcatta taggcattat  
70201 ctaaaaactg caactgaagt ttttgcttga aaaaaataa aaataaaggc aagagtataa  
70261 acaaaaaaaaa tccatcttgt ttttcaaac tgatcaaatt taaaaacaaa gaagcaagcg  
70321 caacaaagc cataaaaaaa ctcaagctat agatataaaa atctcccgca ctcacacgat  
70381 aatcaaaact atttttaatc atcgttgctt cttttatgat attttttcta agccttaaaa  
70441 aataaaaaaa ttcaaaaaa aatgctaaaa aaatagggat taaaaaaagc gaaaccaag  
70501 caattttttg ccaaaaaaat aaaaatgcaa aaatactaaa taaaacaaat agctgaatat  
70561 tatttttcaa taagctcatt aaattcgttc tcatcaatac attttacacc cagctcttga  
70621 gccttgctga gtttagaacc tgcttcttga ccaaaaagca cataatcagt ctttttagaa  
70681 accgatccgc taaccttgcc tccaaggctt tctattagat ttttaaactc ttctctaggg  
70741 cgcgaaagcg tgcctgtgat cacaaaagtc ttgccaaaaa taacactatc ttcttgaatt  
70801 tgtacttttt gctcttttaa atttaaaagc ttataaaaact catcaattct tgcgctattt  
70861 acacgagaaa actcacacaa agaaagagcc atttgctcac caaagccttc taaatttgca  
70921 taagcttcca aactttgctt gtgccattct ttacaaaaac ttaaagctag ctttttagca  
70981 gctacttctc caatatgctc gatcccaaaa gcagtataa aacgaaaaag ctcaaatcc  
71041 cttgcttgct caatagcatt taaaatatta ttgatctttt tttctttaa accttctagg  
71101 cttcaaaaat cgctaaatth aagatgaaaa atgctctcga gagggtttat tttttctct  
71161 ttaaataaaa gttcaactat actttctcca agtccgtcaa ttttaacaa ttttttagaa  
71221 acaaaatgaa tgatagaatt tacaagccta tcttcacaat caatattttg acatttgatc  
71281 aaagttccct catctaaaag ttcgcttttg caagtaggac aaaactgagg tctagctata  
71341 tcaagttcta agccatctct acgctcttta aaaactttag ttatttttgg tatcacatca  
71401 ccacttctta tcacgcttac aaaatcattg atttttgcat caagtcttgc aatttcatca  
71461 aaattatgaa gtgtggcaga ttttacaata actccatcta aatttacagg ctctaaaacc  
71521 gccacaggag tgataacccc gcttcttcca acctgcaaat ttaccctat taaacgcgta  
71581 gttttttcca aggctggaaa tttaaaagct gccataaatt ttggaaatth cacagtatga  
71641 cctaactctt tacagagtgc aagatcatct actcttacca ccattccatc catcatcata  
71701 ggctttttat ctcttaggct taaaagctca ttataagctt ttaaaacctc atctaaatth  
71761 acacaaagct ttacaaagtc atcttttaa aagccaagct ctcttataaa actcataatc  
71821 tcgctgtgth tactaaatth aagtgagtht tgccctacc ccaaggata gaatttcaaa  
71881 tttctttctc ttgtgatgct tgtgtcaagt tgtcttaaac tcccacttgc ggcattgctg  
71941 ggattggcaa acaagcttht gtttaaaccg gctctttttt cattgattth ttcaaaatca  
72001 tcttttaaaa tcaccactth gccgcaatth tctatcttht ctttatagth tatagthttt  
72061 gggatattgt cgattthcaag cacattaagt gtgatctct cacctatthc cccatctct  
72121 cttgtcgcac cgcttattag tctaccatta tcaataagca aatttaagct tgctccatca  
72181 aatttaggct ctataaaaaa attctcttca catcttgca gctttgcca tgctctaagc  
72241 tcaactctcat caaaaacatc ttccatcgac cacatacgac ttaaatgaga aagthtttth  
72301 aattcgctth gtatagtagg ggctatthtt tgcgtaggag aatcaggaga aatttcttht  
72361 tcattthtgc cttcaaaagc tcttaattct ctaataaag tatcatatth tgcactctth  
72421 gctaaaggct catctthttc ataatacgcc ctcatccaag aagcagccaa ggcaacttht  
72481 tctaagtact ctttttttgt cattthaaact cctatgctth gcatcgcat thgccattgca  
72541 aaaagctgth tatgctcata taaatcatgc actcttataa tacttgcgcc atthttcaaaa  
72601 gcctthaaat gcaaatataa agtccccgct aagcgtctth taacttctact ttcataatac



72661 gcattgatca cgctttttacg acttgctcct acaagcaagg gcttttttaa ttgcaagaaa  
72721 tgttctaaat gcttgattaa aatcatatta tgttctgcac ttttaccaaa gccaatccc  
72781 acatctaaaa tactttcttt cactcctaaa gcatctaaaa tttcaagttt ttctttaaaa  
72841 aaactactca tttcatcaag caaatcatca tatcttggat catcttgcac ggtaaaggg  
72901 tcattttgca tatgcataag gcagtatfff gcattgtatt tacttgcaag tttagctaaa  
72961 ttaagatttc ttaagctact gatatcattg ataaatftaa agcccttatt taaagcgtat  
73021 tctaagcaat attcatcaaa actatccaaa ctaaaaatgg cttttttata ataattttta  
73081 tcataaatta aatccagcac atttttcagt cttctaaact cttcttcctt gccacaatac  
73141 acgctttttg gcctagagct taccgctcct atatcaatat actcaggatt taaagctaaa  
73201 atttcattta atctttcttc aaaatcttta taactcacc tagaatcagc attaaaacta  
73261 tcttcattga catttataac tgccataagc tctgcttgct ttggttttga aaaatcattt  
73321 tctaaaaatc tagctaaatt ttttaagcca aaatcttgaa gcttttcttt gtttataagt  
73381 ttgtgaattt gttcttttgt agccattaaa agcgcattag aatgtgtgat tttagcagtg  
73441 ataacttcct tgtgtgttat aagctcagct cccactctta aggcattctt ttttaaaata  
73501 tttgccgcag gagtagttat atctttaatc aaaataaaat aaatttgagt ttttctactc  
73561 ataatttttt gccccatttt atgaggattt ataaaagagc aaagtaaact aaaatcagtg  
73621 tttggattga ttttaaaaaa tttcattttt cattctttgt ataataattt aataaaagcg  
73681 tagccagtat caaagagctt ttagaattta actttgcaag ctcatagctt tcataaaaaa  
73741 attcaagctc atcggcatta aaatctftaa atftaacact ttcttctgca atcagtgcca  
73801 ttttttccat taattctgct ttatctaaat tttcattttc ttgtaaaaac tcaaacaaag  
73861 tctttaaatc cattttatta agttctaaat ttaaagtatt tttagccttt attttgttgc  
73921 gtttttcaca aataagacgc gattttatgg taggtaaaag taaattttta gaaggaacta  
73981 cgataagaaa tttaatattt tttggcggct cttcaagaag cttgagtaaa aaattttgag  
74041 cctctatcct aaaagaattt gccattaaaa caatgatttt ttcacttgtt tctgcgatat  
74101 agctttcctt ttcaaccgct ttagcatcat cgattaaaaa ctcacttgca acttctttag  
74161 gtataaaacg caaagaattg ggatgaaatt gctftaaaag ttcagcccta ataccatcaa  
74221 aatcatcggg gatgataatt ttacttacia acactaaaga ctcactttgg aaaataaaat  
74281 cgcacccaaa ctcgtatcaa aaagtttata aagagtgatg agtttgacat ctaaactctt  
74341 atctttggaa ttcaaataaa aactatcttg caattgctca tcaaaaagcc ataaaagact  
74401 atcgtcgcgt gatttagcga ttaatgattt cttatcgctt gcactcccta tataaaaata  
74461 aataaagcca ttaggaaacg aaatatcaag taaatcatta agcaaggcta tatcttcgat  
74521 attttgtatc ttttttttac ataaagattt taaagataca aaaggagca tgggacgagt  
74581 agttttggaa tttatatttg ccaaaaagta ttcttcatac caagcccttt gttcatcaca  
74641 catcaaaaca aaggttcgcc cctctaaaag gtattftaat cttgcagcca ttaaaggagc  
74701 ccattctaaa cgacgagact ccatccaagc cataaatgft cgcctattgc ggatattttc  
74761 aagtgtaaaa cttaaaaaat cgctcattta tttatcaagt ccatagcact catgcaaggc  
74821 tcttaccgca agctcgccat atttttcatg cacaatcatt gaaattftaa tctcgcttgt  
74881 agaaatcatg cctatattaa taccctcatc tgctaaagct ttaaaggctt tgcttgctac  
74941 acctgaatgt gatttcatac ctacgccac tatagaaact ttaaccacag cactatcgct  
75001 ttctatggft gtcttagaac ctaaaatftt ttgcatagca ttttttgcca aatcaagctc  
75061 attttgaggc acagtaaact ctaaatttgt agctccatct actccaacat tttgtataat  
75121 catatctaca ttgatatttt catctgctaa aacagaaaaa atttcagccg cgattcctgg  
75181 tttatcttct atatttctta aagttactct tgcttgattt ttatctaaag caataccact  
75241 aactaaagct tgttccattc catcttcttt tgttatcatt gtaccctcat tatcattaaa  
75301 actacttcta gtaactaatt ttacattfta tttttttgca agttcaaccg agcgattttg  
75361 caaaacctta gctcccaaac tagcaagctc aagcatttct tcataagaaa ttttatcaag  
75421 tttttttgcc tttggttcaa tccttggatc tgmtagtata actccatcca catcggtata  
75481 aatttcacac aaatccgctt taagagctcc tgcaacagca accgactca aatcacttcc  
75541 gccacgccct aaagttgtaa catcaccctc tttatcaact cttgaaagc ccgctacaac  
75601 gactattttt cttcattfta aagccttggg aatttcttga gtgtcaatat aagaaattct  
75661 agccttttga gaaacgctat ctgtaacaat tcttgctttt ctccctgaaa aagcaagaga  
75721 aggatattcct ctttcattga gtgcgataga aagcaaagca ctcgttacgc gctctccact  
75781 actftaaaagc atatccatat ctttgccatt aggatttttg ctaaagtatt ctgcttgctc  
75841 tattaaagta tttgtaactc cactcatcgc tgaactaca accacaagct gatgtccctc

75901 ttttgcactt tttataacac gctctgctac cgcatacaatg cgttctaaag tgccaacgct  
75961 tgttccgcca ttttttgaa ctataagcat taaatataac ctttctcttc aaaatattta  
76021 ataactttaa cataaatatt tctcttgaaa tgatttatgg tttcaaacac ttgttttact  
76081 ccgacaaatt gataagcatc aaattcagga tgttttgtat taatattaat tttagcaccg  
76141 tgttttaatc gcactaaaaa atatttttgg ctttgccat cataaggata cattttttta  
76201 gcaatctttt ctggaaagtc ataactcaac cattcaggat gctcagctat gatttccact  
76261 tcattcgtgc caatctcttc cttagctct cttatacag cacttttagg gtcttctccc  
76321 tcatcgatac caccttggg aaactgcaa atattatcca tctcgttct tttggctata  
76381 aaaagcttac actcaaaagg ataagcactt gataaaaca tagcagcgac attgggtcta  
76441 tactttttt cttttccac tttttcctt caattttaag cttataattt taacctaaat  
76501 gaaatcaaaa tttcattaaa ataagaaaat aacattataa aatttaaggt ttttatgcat  
76561 ttatatattc atatcccttt ttgcgaaagc aaatgccatt attgtgcttt tacaagccta  
76621 aaaaaacatg attatgaaaa caagtatttt gaggctttat ataaagatat ttcctttcat  
76681 ttgcaaaaat taaatattaa aaaaaatagt attaaaacc tctttatagg aggaggtacc  
76741 ccaagtgctg ttagtgcaaa aaattttgaa atgatcttaa cacttataga acctttttta  
76801 agtaaaaaata tagaattttc aagcgaggct aatccaatt cagccgatag agactggctt  
76861 aaaacaatga aaaatttagg ctttaatcgt atctcttttg gagcgcaaag ctttcatcct  
76921 aaaaaactag aatttttagg aagaattcat gatcaaaaaa tgatttttaa agcattggaa  
76981 aatgcaataa aactgggatt taaaaagatt aatttagatc ttatttatga taaaaatta  
77041 gatgataaaa aaatgcttca atttgaactt gaacaattaa aacaattaa aaatttaatc  
77101 actcatctaa gcgcttataa tcttaccata gagccactga gtacttttgc aaaaaaggat  
77161 cattttaaaa aaaacgccc ctatttgatg aaatttttca tccaagaact tcaaaagctt  
77221 ggatttttac aatacgaat cagtaatttt gccaaaaata aagcccaaat ttgcaaacac  
77281 aatttagcct actggaaagg tttggattat ctaggctgtg gtttgagcgc ggtgagttgt  
77341 tataaaaacg agcgttttta tacggctaaa aatttaaaag attatcttca aaatcctgtc  
77401 tttagggatg ttgaaaaact aagtcaagaa gatttaaatt tagaacatct attttttagga  
77461 ctaagaagta tagtgggtat tgaagaatgc aaattaagcg aaattcaaaa agaaaaagcc  
77521 aatttacttg taagagaaaa aaagcttaaa tttgagaaag ggcgttacta taatcttaac  
77581 tttttaatta gcgatgagct tgccttatat ctctcatctt aaattcaact tttttaagta  
77641 aaatatttct tttataaaat ttcaaatatt ttaagagtat tgtttatgag ttttggtgaa  
77701 attattgtaa ttttaatagt agcaatttta gttttagggc ctgataaact tcctgaagcc  
77761 atagtgcaaa tagcaaaaat tttaaaggct ttaaaacgca atatcgatga tgcaaaatca  
77821 agcatagaaa aagaaattcg tatcaatgat ttaaaggaag aagctaaaaa atacaaagat  
77881 gaattttcaa gtgcaaatga aaacatccgt aaaaaactta gttttgaaga atttgatgat  
77941 ttaaaaagag atattttgga taaaactaaa gtggatttga cttttgatag cagagaaaat  
78001 tccacccta acccaacga acaaaatcca aatgaaaatc aaaaaccaa actcaatcca  
78061 tttgaaaatc aagaaaaagt agaaaaataa atgtttgaag aattaagacc ccatttaata  
78121 gaacttagaa agcgtctttt tattagcgtt gcttgtgtga ttgtaatggt tatagtatgt  
78181 tttgcttttc gtagctatat cttagatgtg ttaaaagcac ctcttattca ggctttacct  
78241 gaagtagcta aacatgtcaa tgttatcgaa gttcaagagg ctttatttac agctatgaag  
78301 gtaagttttt ttgctgcttt tatcttttct ttgcctgtta ttttttggca attttggaaa  
78361 ttcgtagccc caggccttta cgataatgaa aaacgccttg tggtagcttt tgtaagcttt  
78421 gcaagcatta tgtttgctct aggggcttgt ttttgctatt ttattgtagt accttttagct  
78481 tttaaatttt taatcaatth tggtttaagt gaagatttta atcctgtaat caccatagga  
78541 acttatgtgg acttttttac aaaagtagtt gttgcttttg gcttggcttt tgaaatgcct  
78601 gttatagcat ttttctttgc taaaattgga cttattgatg atagtttctt aaaacgccat  
78661 tttcgcatag ctgttttagc tatctttgta ttttcagcct ttatgactcc acctgatgtc  
78721 ttatctcaat ttttaatggc tgggccactt tgcggacttt atggactttc tattttaatc  
78781 gttcaaaagg taaatcctgc tccaaaagat gaagaaaaag aagaaagcga taaatgaaag  
78841 atttacttct ttcaagctat gattatacct tacccaacga acttatagct acttatcctg  
78901 tgtatcctaa agaagatgcc aaactcttag tttttgagcg aaaaaataat caaatttctc  
78961 atactacttt taaaaattta caagatttct taccgattg caccctcttt tttaatgata  
79021 ctaaagtcac taaagcaaga atttatggga ataaatcaag cgggtgaaaa atagaacttt  
79081 ttctacatca acctgtttta ggtttgcaag attcactttt ttttagcaca attaaagggc

79141 gcgttaaaaa agatgaaatt ttatcttttg aacaaaattht aaaagctcaa gttgtagaac  
79201 ttttagatga tggcttacgc aaagtacaat tttttcaaaa taatgaaatt ttaaatactt  
79261 tcaaacttta tgaactcctt gatgtaatag gacatgtacc cttacctcct tacatcaaaa  
79321 gaagtgatga aaaaagtgat ttagaagatt atcaaagtat ttttgctaaa aatttaggag  
79381 cagtagcggc tcctacggct agtttacatt ttagcgaaaa tatgcttgag aatttaaaaa  
79441 agaggcatga aatttatcat ttgactttgc acgttggcgc aggcactttt aaaagtgtag  
79501 aatgtgaaaa tttagaaaat cataaaatgc acagtgaatt ttttgatatt ctaaaaaaag  
79561 catgtgaagt gattgattct caaaaaaaga ttttaggtat aggcactaca gtaacaagga  
79621 ctatagaata ctacgcaaga actaaacaaa gccaaaggctt ttgtgatctt tttttacatc  
79681 ctacaacc acccctaaga caagactatc ttttaactaa ttttcatcta ccaaaatcaa  
79741 ctctgattat gttagtttca gcatttatag gaaggcaaaa ttgccttaaa ctttatgata  
79801 ttgccataaa agaaaaatat cgtttttact cttatggcga tgctatgctt attttataaa  
79861 tttattcttt aaatttcata gcaatthttg cttgaagttt aagccaatct ttttgaggca  
79921 ttataggaaa acctccataa actctgccac cttcaagatt tttactcaca ccaccacgag  
79981 ccgcaatggg actaaaatcc cctattctta aatgtccact cgttgcactt tgtccgcca  
80041 taaccacatt gcgtccaagc tcacttgagc ctgaaattcc agtttgtgca acgatgatac  
80101 aattttgccc tatatcgcaa ttgtgtccta tttggacaag attatctact tttgttctg  
80161 ctttgatgat agtgctatca aacactgctc tatctattgt tgtgcaagct cctatttcaa  
80221 caaatcttc taaaataaca ttaccattgt gatagatttt ataatgctct cctattttat  
80281 tgtgtgcata accaaaccca tcacttccta ttacgcaatt tgcaagcagg tggcattttt  
80341 tgccaatttt actatcatta taaatcacca cattaggatg gataatactc tcttcgccta  
80401 tgctgacatt atctcctata taagctcctg ccataataac aacattttcg cctatattga  
80461 cattattgcc tatataaaca tttggcatga tttttgcact ttttgctata ttttgaactt  
80521 tttcttttgc attgctaaat aaaggcttag caaaaattht actcaaaaaa gcaaagcata  
80581 aatgcggact ttgggtaata agagcctttg tatctttagg cactaaattht tcatattctt  
80641 tagcgaccaa aatcgctgct gctcctgtgt tgggtatatac tttgatattt ctttcgcat  
80701 cacaataagt aagctcagta aaatttgctc ttaataaaga atthaaagcc gttatttcaa  
80761 tatcttcgcc ttcgtattct aaacttaaaa attccgctat tctttttaat ctcatthaa  
80821 ctccattaaa accgatccac tgcgaacaat atcgctagga ttgtattttt taattgtttt  
80881 tagaaaattht tctatgcggg ttgtatcatc agctacaagt aagaaaagaa aattttcatt  
80941 actatttgca atagtacat tataagcttht caaaacggca tcaagcccac ccaaattht  
81001 actgagtggg aatttttcaa gtgccatttc tttttctata aattcatctc tttctattac  
81061 tttataagta ggtataagtt tatgcaactg ctttactatt tgctcaaaaa cacgctcatc  
81121 tccaaaagtt actatattga tacgagaaaa ttctccacct ggtaaaggag cgacggttaa  
81181 gctatcgata ttatatcccc tacctgaaaa aagtcctaca atacgagaaa gcacaccatg  
81241 ttcattthaa actataaccg ataaaacacg tctcattgct tatcctthaa ttttggtaaa  
81301 atcatattat aaatagcccc gcccgtggc accataggaa gtacatcttc aaaacgatct  
81361 ataaatacat taagcaagct tgttttattg gactctaagg cttgctthaa tgcgtgtgga  
81421 aattcatctt ttgtttttat attatatcct tcacatcaa aaccttcagc tatttttaca  
81481 aatctgctt gcaagcttaa atctgtagcc gaaaaatgct cttcataaaa catactttgc  
81541 cactggcgaa ccattcctaa gaatgaattg tthaaaataa tatttatggg tthaaatcaa  
81601 ttttcataag ctgtcattaa ttcttgaata ttcattthaa cagaaccatc gcccaaaaa  
81661 tttataacaa cttcttctcc tactgcaagc tttgcgcca aagcagcagg taaagaatat  
81721 cccattgttc cttgcccacc actggttgca agctgtcttg gataattthaa aggataaaat  
81781 tgcgcaacc acatttgatg ctgtcccaca tcagtaatta tccttgcatc tggagcaagt  
81841 tttgcgcact cttgtattac ccattgaggt tthaaaacct catcactatc ttcataagct  
81901 aaaggataaa gctcatcata gcgtthaaaga gtttgtctcc actcatggat atttgactta  
81961 aattgatttt ttttcaattc ttccaaaagc tctthaaaca cttctttgat atctccaact  
82021 ataggaaaat gcgcattgat aatcttagaa atagaacttg gatctatatac aatatgcaact  
82081 attttagaat gcttagcaaa ttcacttggt ttacctgtaa tcctatcatc aaaacgcgag  
82141 cctattgcta ctaataaatc acattcactt aaagccatat tagccgtata gcttccatgc  
82201 attcctgcca ttttaagatt tagctcatca tcgcttctta aggttccaag agccattagg  
82261 gtttcaacgg ctggaatttg agtaatctta acaagctccc tgatctcatc agccgcattht  
82321 gacgctatac atccaccccc aagataaaaa agaggacgct tggcttcttc taaattttca

82381 gccaatcttct taatctgttt tgaatcttct ttataaatag gcttataagt tttcattgaa  
82441 atctcttttg gataatccca aatgccaaagt gctgctgctta catcttttgg tacatcaatg  
82501 tgcacaggac cttttcttcc actttttgct atgtaaaaag cttcttttag tattcttgga  
82561 aattcttcta tacaagtaac taaataatta tgttttacac agggacgaga aattcctaca  
82621 gcatcaatct cttgaaaagc atcgggtgcct attaatgaat ttgcaacttg acctgaaatc  
82681 aaaaccaaag gtatagaatc actataagct gtcgcaagtc ctgtgatagt attggtaaaa  
82741 ccaggaccac ttgtaacaac agctacaccc acttcaccgc tcattctcgc ataagcatca  
82801 gctgcatgca cagcagcttg ctcatgacgc accaaaatat gcttaaaata cttttgtaaa  
82861 taaatctcat cataaatatt taaggctgct ccaccaggat aacccaaaac tatcttaaca  
82921 ttctcttctt ttaaagcttc gcaaatcatt gccgaaccgc ttatctttct cataaggcct  
82981 ctttgaaaa tcaattata acaataattc aatcttttat ttagataaaa tataaaaaag  
83041 tttgaaaatt ttaatttaa agctctctaa gtgttacatt taatctttt ccatccactc  
83101 tggctccaaa ttagccttt gcttccttca ttaccaaac ttgatctttt aaagaactaa  
83161 cccctaaatt tgcaatcaac tcttttaagg ctgtttgtaa ttctcatcg cttattgtt  
83221 gaggtaaata actttcaaaa agtgctatct cttttgttc tttttgcgcc aaatcttctc  
83281 ttccaccttt ggaataaagc tctatagcat ctttgcgctt tttaatctca cttgtgataa  
83341 tttttaaaat tctttcatca tctaattcta ttctttcatc tacttcaacc tgtttaaacg  
83401 cagcatttag cgttcttaa gtatcgctt taaaatcatc tttttgcttc attgcttctt  
83461 taatatcatt taatatctgt tcttttaaag tcattgtata tccttttatt ttagttaaaa  
83521 ttacaaatct taagatttaa tccaaaacct ttttaagccta tataatcctt atcgaactt  
83581 tgcgacataa gcttaatctc ttctatacca aaatacctta gaatttgcgc acctatgcca  
83641 taatctttta attgagttgc gcttgatctt tcaccctgca taaaaactat cactcctcca  
83701 ttttcactta aaaaacaaat ttgatctaat aatttagaaa atttatcaga agttaaaagc  
83761 tcaaaatcac ttccactaat atgaaatcta acatcttcac atttttgaat ttctttgaat  
83821 gcaaatgcta tatgttgagc attattatga tctgtaaaaa taaatctttg cgctttaaaa  
83881 cctgctaaaa tagcatcact tttttcttgt aatttaataa ggctttcatt ctttaaacga  
83941 tattctataa tatcagaaac ggctatcata tttagattat gcttggcgca aaattcctcc  
84001 aatcacttc ttcttgccat atctccatca tctttaacaa tctcacaat cacacaagct  
84061 tgtttaagcc ctgctaattg acaaagatca accgttcctt ctgtgtgacc tgtgcttct  
84121 aaaacaccac cttttttagc tatcaaagga tttatatgtc cagggcatac aaaatcactt  
84181 gcttttgcat tatcatctgc aaaaatcttt atcgtcatat ctctttcata ggcactcaca  
84241 cctgtgggtg catcttttgc atccactgtg atcgtaaaaag ctgtttcatg atttgaagta  
84301 tttttgggta ccattaaagg aagttcaaat tttcttgcaa gctcttctgc gaggtgctaca  
84361 catacaactc ctctagcttc ttttatcata aaatttacct tttctttagt gctaaattga  
84421 gctggaaaaa tcaaatctcc ttcatcttct ctatcttctg catctacat tacaagcatt  
84481 tttccttctt gtaaatcctt aatcgcttgt tcaatgctta caaacttcat taataatcct  
84541 taaatattat tttttttaa attataactt tatttgcttg acaataaat taaaattgat  
84601 tataatctcg tttttacttt ttgaaaatta aatcattggg gtatcgcaa gcggtaaaggc  
84661 aacaggtttt ggtcctgtca ttcaggggtt cgaatccctt taccatcc acaaatcaaa  
84721 cttcaaacac aaattcagtt gtcgcaagat agagcagtggt ttagctctgc gggctcataa  
84781 cccgaaggct gggagttcaa atctcccctt cgcaaccaa atctatctac aactttaaat  
84841 cctaaatata caaaaattat ttatcttaat tttttagaat gtatctttta atcaaaaaag  
84901 tcgcattata aaataataaa aaataaatta tagctaacat gttaagatat aatatgagat  
84961 aaatcttttag ataaaattta aatgaataac ttaggaagaa attaaagtca tttttaataa  
85021 aaaataaaaat gatggtgggt agaggcagaa tcgaactgcc gacacgcaga ttttcagtct  
85081 gctgctctac cgactgagct atccaaccaa atcatcttta aaaaataaag tgaattata  
85141 cttttttttc ttttaattta gtttaaatat aaaaataaaa ttttatttgc cttaaagttt  
85201 taatccgata gaatagtcga tttaaaatca aacaaccaa gaggattttt tgaacaatt  
85261 tggcttagac agacgaactt ttaaaatctt gctagcagga tatattgtga ttgctttact  
85321 tgggtctatt cttttgcatt caagctgggc tcatacaagt cctattagtt ttatcgatgc  
85381 tttttttact agtacttcag ccgttagtat gactggactt attgttaaaa atacagcagt  
85441 tgatcttacc ttggcaggac aaattattat ttttaattta gttcaaatg gtggcttagg  
85501 ttatatgagt atagggtctt ttgtttactt aatcatcgc aaaaaagtag gtttaattgg  
85561 tagaaatctg cttaaagaat ctttatttta tccttcaatg gagggacttt ttaattctt

85621 taaaaaagtt ttactattta ttttcacaat agaacttata ggcaccatac ttcttactat  
85681 gcgttttgca cttgaaatga attttggcaa ggccttatgg tttggatttt ttcactcaat  
85741 cagcgctttt aataatcag gctttactat ttttgaaaat ggacttcttg cttacaaaca  
85801 cgatgtagct attaacttta tctttacttc tcttattatc attgggtgggc ttgggtattt  
85861 tgtcttagtt gaattgtatt tttttcaaag aaaaagactg caaaatttaa gcttgcatac  
85921 taaagttgtt attatggcga ccctttttct tattgtttct tcaactctta ttatttttct  
85981 tttagaatat gctaatacaa aatccatagg tagcttttct ctttttgata aaattttaag  
86041 ttcttatttt attgcatca attaccgcac agcagggttt aatacactcg atatgagtgg  
86101 tttgcatgat gcgagtttgt tttttggctc tttgtttatg gtgattggag gagcaccggg  
86161 tgggacggca ggcggaatga aatcacaac tgtttagtg cttttgtttt atgcttactg  
86221 gagcattcgc aatggaagag taagaatttt caaccacgaa attccacaag agattatttc  
86281 aagagcattt attatagcag tgggttcggc tgtttatata gttatagcgg ttattttctt  
86341 ttctttgcta gaatcagaat ttaattttat tcatctgctt tttgaaacct catcagcatt  
86401 tgcaacagta ggaatttcag taggagatgg aggagatctt tcgctttgtg ctttatttag  
86461 caatccaagc aaaattatta ttattattat gatgttaagc ggaaggattg gtgtttttgc  
86521 atttttactt tctgtctttc aacaagataa agcaatgcat atcaaatttc ctaaaggaaa  
86581 aatctattta taaaggttaa atataatgaa aaagcttagt tacgggggta taggacttgg  
86641 aaaatttggga tccgtagtcg cagatgagct tattgctgga gggcatactg taatcatagc  
86701 cgataaagat gaagaagctt taaaaagcat acaaaattca ccaagctatg cttatatctt  
86761 agattctact aatatttcag cacttaaaga agcaggtttt catgatgtag aagtcgtgat  
86821 tgtaagcata ggcgaaaatg ttgaaaaatc catacttacc ctaatggctc ttaaggacat  
86881 aggggttaat aatattatcg caaaagctac ttctaataat catgggcaaa ttctatccaa  
86941 actaggagct acaaaaagtaa tttatcccga aaaagaaagt gctaaaaaac ttgtaaaaga  
87001 ctttttaact aaagatgcag attatgaagt ttttgatcta tcgggctaata ccatccgcgc  
87061 tattaaaatc accatagatg ataaattagc gggaaattca ttaaaacaca ttgcaaaaa  
87121 tatgaaagtt atcagctata aaaagctcaa tacagactgg gaaatactgc ctgatttaga  
87181 aacaactact gtttatgggt gagatgttgt aatcttactt ggaacagtta aagaacttag  
87241 agaatttgaa cattaatcaa gtaggattta aagccttgca agcttttata aaacgcttta  
87301 aggctgcttt ttctttgggt gaaattttat aatatataat ttcatctaga taatatctca  
87361 tatcttttat atccaaatth ctcgttgcg cataattht g aagtataata taaggaatth  
87421 taatctttgt ttttggaat ttttttaaga tttgtttata taaagctttt ttttgcacac  
87481 aagaaaatct agcaaaaaca aaaggtaatc ctgttttttc atgccatttt gcacacaaat  
87541 caataactt agaaggatct tgcagataaa gctttaaagc cttatcacct ataatcacc  
87601 tcccctcttg ttttaaaacc ttagctaaag cattagaagt tgccgagctt ggatctttag  
87661 cattgagcgt atttctttcc actaaaacac tcaaaactct tttattggca caaatgccca  
87721 aatctaaatt tttatatttt tttctagcac tttctatgct tgaacaata gcagcatcaa  
87781 ctcttctata aaacaaatcc ttatttagct tacttggcac accttttttg tattccatgc  
87841 ttgctttata accattgggt agtgatact ttttaagata aatatgcaaa ggtaaaagat  
87901 taatataatc aatthttcca aaaatcattt taatccaagg tattaaaaac cctatctccc  
87961 gcaccccaa gtcttggaa tatataacct ttttcattta agctttcatc aattgaggct  
88021 acataaagtt caacatcgct gtgaattttt gcaaaatttt caagaccttg aggggctgcg  
88081 agtatagaaa tgaatttaat cttttttacc cttgatctt ttaaaaaatt gcaagcatct  
88141 atggctgtac cacctgttgc gaacataggg tctataacaa tagcagtacg ttcttttgca  
88201 tctttaggaa gtttttgaaa ataaaaatcc gccttgagcg ttttttcatt tctaacaaaa  
88261 cccaaaaatc ctacactagc atcaggaata agtctaaaaa tactatcaag catacccaaa  
88321 gccgccctta aaatagggca tatcataatc ttttcatcta atctttttac cttggcatta  
88381 gcaacagggg tttgaatttg tgcttctttt aaacataaat ctttagtcgc ttcaaaaagc  
88441 aagaaagtag aaatctcatc aatgagcatt ctaaaatgaa agggtttgggt ttctttatcg  
88501 cgcaaaaatc ctaatttatg ctctatcaaa ggatggcata tatgatgaat atttttcatt  
88561 ttaactctc aaaatagct ttttcatcaa atcttttaag caaagctacc ccatctttta  
88621 cagctgcagc agccactgca gtacttaca cagccttaac tctctcatca aaaggttttg  
88681 ggataacata atcttttcca aattctaagt ggcttatatt gtaagcattt ttcaccgcat  
88741 cgcttacagg tagctttgct aaatccgcca aagctcttgc tgcagctact ttcatatttt  
88801 cagtattttt tgtcgcacgc acatctaaag ctccacggaa aataaaaagga aagcctaaaa

88861 cattattgat ttgattagga taatcactcc ttctgttcc tacaatagca tcttttctaa  
88921 gtcttgctac atcttcaggc atcacctctg gaataggatt tgccaaagca aaaataacag  
88981 gatcttttgc catagacaaa atcatttcat catctagtat ctttggcgca ctcagtccca  
89041 aaaatacatc cgcacctttc atagcctctt ttaaagtatc tgcttgtgta tcacttacaa  
89101 attcaagttt gtattgattt aaatccgttc tttttttatt gaccacacc ttgctatcta  
89161 caagaatgat atttttaaca cctaaatttc tatacattct agcactagca ataccgcgag  
89221 ctctgctcc gcttacaaca actttaatgt cttcaaattt tttaccgctt atctccatag  
89281 cattcataag ccctgcggtt gagataatag cagttccatg ctgatcatcg tgcattacag  
89341 gaattcctaa attttgcaaa gccgcttca tttcaaaaaca ttttaggcgct gaaatatctt  
89401 ctaaattgat tccacaaaa gtcggtgcta tggctttgca aaaagcaaca atttcttcaa  
89461 tactgtgtgc ttcgatttct aaatcatacg catttacatc agcaaatfff ttaaacaagc  
89521 aagccttacc ttccataaca ggtttagaag cttgvcgacc gatatttcca agacctaaaa  
89581 ccgcagaacc atcactaacg atagctacta aattcgcttt gtttgtataa gtataagcaa  
89641 gctcattggt agaagcaatt tcaatgcaag gttctgcaac acctgggcta taagccaaag  
89701 ataaatcatg gcttgaattc ataggttttg atggttttat atctatctta cccctaagt  
89761 ggtatcttaa agcctcttct tttaaattca ttattttcct ttaaaatcta aaaatftttc  
89821 tattcttttt ttacattcat tgaccctaa aaactctaaa acttcaaaaa tgctaggact  
89881 aaccgcactt cctgttagag ctatgcgat aggttgagcc aaatctttta attttacctc  
89941 atttttttgt aagaattcat tagtaaattc ttcaaatct tttgcacttt tctcttcatt  
90001 taactcattt gcatagtttt gaagcagtaa aagattatftt tcatttataa atttatfttat  
90061 agcattttca tcataatftt gtggcgcttc aatgatactt ttagctccgc taataatftt  
90121 aagtaaagtt tttgcgctt ctcttaataa atccagcaaa aatcctgctt ttgcataagc  
90181 gcttaaatca aagcctagat cttttaattg gcgattgatt tcttcaaaaag gtaaagtctt  
90241 gatataatga gcattgagcc attcaagttt tttaaaatta taacaagaag cacttttgtt  
90301 aatatgattt ggatcaaaaa gctttttaag atcttctaaa gaaaaaacct catcatcacc  
90361 gtgactcaa cccaagcgca ctaaaaagtt taataaggct tgaggtaaaa ttcccatagc  
90421 ctgtattcc atcacatcgg ttgctccatg tcgttttgat agctttttgc catcttctcc  
90481 atgtatcata gctacatggt aaaatfttagg aatftcaaat cctaaagcct cataaagcac  
90541 gatttgctta ggagtatttg aaagggtgac atctcctcta atcacatcac ttactcccat  
90601 taaagcatca tcaattacaa ctgtaaaatt ataagtaggg cttccatcgc ttcttgctat  
90661 gataaaatca tctaaaatat cttctactftt aaatftcacc tctcctftta caccatctac  
90721 aaaacaaatt tcaccctctt gaggagctftt tatacgcact acaggttcta tatttgctgg  
90781 aggagtgcct gtaaaatctc tataatctgcc atcatatctt ggacgttctt tagctgcttc  
90841 ttgttttagca cggagctcat caagttcttc tttactcata taacaataat aagccttgcc  
90901 ctcatctaaa agtttttgta tatatftttt ataaagatca aagcgttcag attggtaagt  
90961 tacctcgcca tcataatcca aaccgcacca tttaaaggct tctatgatag cttgcgtagc  
91021 ttcttttagaa tttctfttca aatccgtatc ttcaatacga agtaaaaaat tacccttgtt  
91081 tttcttgca tacaatagc tataaagagc agttctftaa ccgcctatat gtaaataatc  
91141 ttagggctt ggagcgaac gagtcgtgag tttcctgtc atftttttgcc tttctftaa  
91201 tfttaattga tataatgcga tftttacact taaataaagg tttgaaatga agaaaatftt  
91261 actaagtttt atatftttta taagctaac tcatgcaaat actataaatg ctattgacct  
91321 agtggtagat aaagagccta ttacaaccta tgatatagag caaacatga aagctfttaa  
91381 tatacctaaa aatcaagctt tgggaatftt gattaatgaa aaaatggaac tttcacaat  
91441 aaaacaatftt ggaatfttaca caagcgaact tgagcttgat aatgctattg ataaaatgftt  
91501 aatgcaaaaat aaaatfttcgc ttgaagactt taaaaaagat ttgcaagtca aggggcaaaa  
91561 ttacgaacaa tttcgtagta atfttftaaaa agatfttcgaa aaaagaaaa tctatgaaaa  
91621 aattgccagc accgctaaaa ccgattfttag cgatgaagga gctaaaaatt ttttgaaca  
91681 aaataaaaaac aaatfttcat tftttaccga aatftaatgta aatatctatc gttctataa  
91741 cgctcaagat ctagaaaaata taagagctgc tataaaaact ccactftaaag cagaaaaagc  
91801 tatcctaact ctaacaatftt cagatccaag actcctagga cttfttatcac ctatccctftt  
91861 aggaggctftt tctccggtftt taaatftcaca aaagggttat gaaatfttatc aagtaaatga  
91921 taaatctaaa gggcaactc cagaatatta tcaaatftaa aatgaagtgc tcaatgccta  
91981 tgtaagcgag caaagacaaa atttatataca agatftfttt gataaattac gctcaaaaat  
92041 caatatagaa tfttftaagat aaaatcaaga tggaaaaaat ccatcttgat caatgtctag

92101 caagatagtt agtatcgtaa ttattattaa taaaatcagg attatccatc attgcaagat  
92161 gaaaatcttt agtgggtttta atcccaccta taatcagctc atctaaagct actttcattt  
92221 ttgaaatagc tttgttgcca tcttctgccc aaaccacaag tttccctatc atagagtcac  
92281 aatacgggtgg cacgctatag tcttgatagc aatggctttc cattctgaca ttgctgcctg  
92341 caggtggaac atacctgata attttacctg gacttggcaa gaaagtctta ggatcttcag  
92401 ctgtgattct acactctata gaatgtcctt ttaatcttac attttcttga gatggtaaag  
92461 catagccttc agctactttg atcatttggt caataatata aatcccactt accatttcac  
92521 tcacacaatg ctcaacttgc aaacgcgtat tcatctctat aaaataaaaa tccaaatttt  
92581 tatccactaa aaattcaaaa gttcctgcac cctcatagct tatagcttta gcagctttta  
92641 ctgctgtttc atgaagtctt gcacgggttt tttcatcgag taaaattgct ggagattctt  
92701 ctataagttt ttgggtggcgt ctttgcatag agcaatctct ctgcckaata tggatcacat  
92761 ttccaaaact atctccgatg atttgaactt ctatatggcg tggattttgt atatatTTTT  
92821 ccatatacat agtcccatca ccaaaagctg tcatcgcttc actttcagct gaccaatatg  
92881 ctttttcaag atctttttca tgctctacta cacgcattcc acgacctccg cctccagctg  
92941 ctgcttttaa aatcacagga taaccgatct ctttggcaag ttttttagct gcttcagcgc  
93001 ctgctaaagc cccatcactt cctgggtataa caggaactcc tgctctttgc atcacttgct  
93061 tggcttttga tttatcgctc atcaaattca tagcttcaac cgaaggctct ataaatttga  
93121 tattgtgttt agcacaatt tcaacaaaag tttgattttc acttaaaaaat ccataacctg  
93181 gaaaaatcgc atccgcttct gcaatttcag ctgctgaaat aatagcaggt atattgagat  
93241 agctttcaga acttcttgct tttcctatac aaatacttgc atctgcatat tttaaatata  
93301 aagcatcttt atctgcttca gaataaacgc aaattgcttt ttttccatt tctttaattg  
93361 ttcttaaagc tcgaagtgc atttctccac gattagcaat taaaatgctt ttaatttcca  
93421 ttttataatt tctccaccgt aaataaaggc ataccaaatt ctacaggctg accatctgca  
93481 actaaaattt ctactattct acaatcaaat tcagcttcga tctcattcat gattttcatc  
93541 gcttcgataa tagcaatagt atcgcctttt ttaactgaac taccacttt taaaaagga  
93601 gctgcacctg ggcttggagc ctgatagaaa gtaccacca tagggctatt tatacttggg  
93661 ttgtttgact ttgcacttga aggctgtgct tcattaacta cattaacatt tataggttgt  
93721 ggagctggaa cgggtggaca agccaaagga gctggaacat cacaacacat atctctttca  
93781 agttcgattt caaatccatc ttgctctttg atttttattt tgctgatatt agcttcagca  
93841 aataaattta ctaattcttt aatctcttct tttgtcatat tttcatctcc tgattttaag  
93901 aacttaactt agtattatat taaaaaactt gaaatttaac tttaaaaaat aaaatttcac  
93961 gcttaaaagt ttcataaaat ataaaaata agctataatc caaaaaaatt atgtttaaaa  
94021 aataaaggta tattaaatgg gtttaaaagc agacaattgg ataagaaaaa tggcactcga  
94081 gcatcaaatg atagagcctt tttgcaagc aaatataggc aagggcgttg taagctacgg  
94141 actttcaagc tatggttatg atatacgcgt ggggcgcgaa ttttaagattt ttaccaatgt  
94201 aaattctacc gtagtggatc caaaaaattt tttagaagaa aatgtggtag attttgaagg  
94261 tgatgtatgt atagtcctg ctaattcttt tgcacttgct agaactatag agtattttaa  
94321 aatgcctgat gatgttttag ctatttgtct tggaaaaagc acttatgcaa gatgtggcat  
94381 aatcgtaaatt gtaactcctt ttgaaccagg ctttgaaggg catataacca tagaaatttc  
94441 aaactactacc cccttgctg caaaaattta tgccaacgag ggcatgac aggtattggt  
94501 tttacaaggt gatgaaaaat gcgatacaac atacaaagat aaaaaaggca aatatcaagc  
94561 tcaaacaggc ataaccctgc caagaatttt aaaataggaa cgcttattgc ttttaagttt  
94621 ttaagtgata atttggcaaa ggaaggcaaa atgtttaatg gaaaaaatat ctttaattact  
94681 ggtggtacag gctcttttgg aaaaacctat actaaggttt tattagaaaa ttataagcct  
94741 aataaaatca tcatatttc tcgcatgag cttaaacaat ttgaaatgtc aagcattttt  
94801 aatgctaatt gcatgcgtta ttttataggc gatgtaagag ataaagaacg cttaaatggt  
94861 gctatgcgag atgtagattt tgttatacat gctgctgcga tgaacatgt tcctgttgcc  
94921 gaatataatc ccatggaatg tatcaaaacc aatatccatg gcgctcaaaa tgtaatcgat  
94981 gcttgttttg aaaatggagt aaaaaaatgc attgctctaa gcacagataa agcttgcaat  
95041 cctgtaaat tatatgggtgc taccaaactt gcaagcgata aactttttgt tgctgcaaac  
95101 aatatagcag gcaataaaca aacacgattt agcgttaca gatatggaaa tgtagtaggc  
95161 tcaagaggct cggtagtgc tttcttttaa aagcttatcg cgcaaggctc taaagaactt  
95221 cctatcacag atactagaat gacacgcttt tggatttctc ttgaagatgg ggtaaaattt  
95281 gtattgagta attttgaag aatgcacgga ggagaaattt ttatccctaa aattccttcg

95341 atgaaaatta cagatctagc ccacgcttta gctccaaatt taagccataa aatcataggc  
95401 ataagagcgg gagaaaaact tcatgaaatc atgatttcaa gtgatgatag ccatttaacc  
95461 tatgaatttg aaaactacta tgccataagt cctagtatca agctttaga tcaagagagt  
95521 gatttttagca tcaatgcctt aggtgaaaaa ggacaaaaag taaaagatgg attttcttat  
95581 agttcagata acaatccaca atgggcgagc gaaaaagagc ttttagatat catcaatcat  
95641 actgaggggtt tttaaatgat tacttattct catcaaaata tcgatcaaag cgatatagaa  
95701 gcggttttaa acgccttaaa ggatgaaatt ttaaccggtg gcaaaaaagt cgatgaattt  
95761 gaagaagcac tttgcgaata cataggaatt aagcatgctt gtgtcttaaa ttcagccact  
95821 tccgctcttc atcttgccata tacagcttta aatgtcaagg ataaaaaat cttaccact  
95881 ctttaactt ttgcggctac agctaatagca gctttaatgg caggagctaa agtagaattt  
95941 atcgatatta aaaatgatgg caatatagat gagaaaaagc tcgaagcaag gcttgtaaaa  
96001 aatagcaccg atataggagc tattagcgtg gtggattttg gaggcaatag cgttgaaatg  
96061 gatgagattt caaatcttgc taaaaaatac aatatccctt taatcgatga tgcaagccat  
96121 gctttaggta gcgagtataa gggtaaaaaa gtgggttcta tggcggattt aagtattttt  
96181 tcttttcacc ctgttaagcc tattaccact tttgagggtg gcgctgtagt aagcaataat  
96241 gaagaattaa tctccaaaat aaaactttta agaagccatg gtatcgtaa aaaaagactt  
96301 tgggatagcg atatgatgga acttggctat aattatcgct tgagtgatgt tgcttgtgct  
96361 ttagggataa atcaacttaa aaaactagat cacaatcttg aaaaacgcga agaaattgca  
96421 agtttttatg ataaagaatt tgacaaaaat cttattttt cactataaaa aatcaaagat  
96481 tataaaaaaa gttcaagaca tttgtatcct attttactct ttccagaatt ttattgccc  
96541 aaagaagaaa ttttgaaaa tttactcaa gctggacttg gagtacaggt gcattataaa  
96601 ccaacttatg agtttagttt ttataaaaag ctcttaggag aaataagact tgaaaatgcg  
96661 gataattttt acaaagccga acttagcata ccttgtcatc aagaaatgag cttaaaagat  
96721 gcaaaatttg taagagatac tttattttagc acacttgaaa aagttaaaaa ggactattgt  
96781 ggataagcta gacttttagac acaaagactt tgaacaaacg ggaaaggcta tgtatgaact  
96841 tgccaaggag ctttttccta tccctcgaag tatcacagga caaggtttta gagctagctt  
96901 agaaatttta aataaaactc tgggagaaaa tatactcaa tttcactcta tcaaaagtgg  
96961 cacaaggggtt tttgactgga tagtccctga tgaatggaac gctaaagaag cctatatcat  
97021 cacaccagaa ggaaagaaaa tttgtgattt taaaaagcac aatctacatc ttttaacta  
97081 cagcgaagcc atagataaag aatagaact tgaagaactt gagaagcatc tttactccat  
97141 agaagaatg cctgatgcca tcccttatgt gacaagtat tataaaaggc gttggggatt  
97201 ttgcatcacg cataatgaaa gaaaaaattt aaaaaagga ctatacaaag tctttatcga  
97261 tgcaaaacac gacgaaaatg gagtttttaa ttatgctgat tttataatc ctagcactca  
97321 aattcaaaa gatgaaattt tactctcaag ctatctttgt catccttcta tggcaataa  
97381 cgaacttagt ggccctatag tagccatttt cttagccaaa tggcttttag gtttaaaaga  
97441 aagaaaatac aattaccgct ttgttatcat tcctgaaacc ataggctcta taatttatct  
97501 taataagcat ttagatcact taaaaaaca tgttaaagca ggttttgtgc tttcttgctt  
97561 aggagatgat aatgcttact cgcttataca tactcctaaa gaaaatactt taagcgataa  
97621 agttgccatg cacacactca aaaataagga aaatttttaa gaatttagct tcttgagcg  
97681 tgggagcgat gaaaggcaat acaatgctcc gcttgtgaat ttaaakatag taggaatag  
97741 ccgcacaaaa tatggtgaat ataaagaata ccatacatca aaagatgact taaatttcat  
97801 ttcagtcaag gtttaatgg gcggacttaa ggctatgcaa gaaataatct taaatctaga  
97861 aatcaatgcc atatacgaga acaccacaat atgcgaacc aatcttggca aaagaggact  
97921 ttatcatacg ataaataacg gaatcaaca aaaacctatc agtgttgatt tcctcgcta  
97981 ctgcatggt caaaatgata tcattgatat agctaacatc ttaaataac aagcttatga  
98041 gttaaaagag cttttagaaa aaattttaga atataaacta gtgagaaaga tatgaaaaa  
98101 ctttttcaat ataataaaa aatatacact caaaaagatc ttgttaatac tttaaaaat  
98161 ataggtatta aaaatggtga tataatttgt gtccatacag aatctttca tttcaaact  
98221 ccgctactct ctaaaaatga atttttaaat tcatttttag aagctctttt taaagccata  
98281 ggaaaagaag gaacccttat catgccaaact tttacttata gcttttgcaa aaatgaagtt  
98341 tatgataaac ttaattccaa gtgtacagta ggaatattaa atgaattttt tagaaagcaa  
98401 gaaggtgtaa aaagaacgaa tgaccctata ttttccttg ctgtaaaagg tgccaaagaa  
98461 gatttgtttc tatataaaga acaaaaatcg tgttttgatg aaggttgtat ttataatata  
98521 cttaagaata ataatggtaa aattgtcctt ttagggacgc aacttttag ctacactttt



98581 actcatttta tagaagagca agcacgagtt ctttatagat attttaagcc atttaaggt  
98641 gatattatct atgaaaatag taataaaaaa acatataaaa tcaattacta tgttcgagac  
98701 cttcacaaaa aatcggaagt aagtatttta aaacaaattg ctcttttaaa aaatagcaat  
98761 aattttaagt tggaaaaaat aggcaatgcg gaaatcgtat ctatagactg tcaagcttat  
98821 tttgatgaaa ctatgaaagc tttaaaacaa gatccatatt gtttattaaa ggattaaaat  
98881 gacaactcat atctacaact ttttagaaaa aagccttgct aacttttagcg acaaaactgc  
98941 tttttagtag ctttttgcca aagaaagaaa agaaatcact tataaaaatt ttgatctttt  
99001 ttccaaaaaa gtagccagtg aaatttttaa aaaatttagga aatgacaatc ctactcaaag  
99061 ccctattttg ataatactgc ctaaaggaat tgattgtttg atttcatttt ttggagtggc  
99121 actcagtgga aatttttata cactttttaga tgaaaaaagt cctaaagaaa gagtagaaaa  
99181 agtcatagaa attttaaagc ctaagctttt tatcacttca aaagaattaa aatttgattt  
99241 agctttacct acgctttaca cagaagattt taaaagcttt gatcacagatg aaaacttgat  
99301 ccaagttgcc aaagaaaaac atatcgatac taattttact tatgttcttt ttacaagtgg  
99361 aagtacagga attccaaaag gagtaagcat agcacataaa agtgtgattg attatacttt  
99421 ttgggtgtgt gaaactttta aattcgatga aaatgagatt ttagccaatc aagcaccatt  
99481 ttattttgac aatagtattt tagatatttt ttcaagtgta aaagcagggg caactttaca  
99541 ctttttacc aatcatcttt ttgcttttcc aaataaaaatt ttagaatgcc tagaaaaaga  
99601 aaaggttagc gctacatttt ggggtaccttc agtactgatt tactttgcaa ataccgaggc  
99661 tttagataat ttttaattta taaattttaa aaaaattctc tttgctgggg aaatcatgcc  
99721 taataaacia ttaaacattt ggcgcaaaac tttacctgat acactttttg caaatcttta  
99781 tggacctact gaaatcactg ttgattgttc tttttatata gtagatcgtg aatttaaga  
99841 tgaagaactt ttaccatag gcaaagcttg taaaaatata gagcttttag tatttgatga  
99901 aagtatgaat ttgataagtt ctaaacaagt gggcgtaaaa ggtgaacttt atgtgagagg  
99961 aacttcttta tcttttaggt attataacga caaagaaaag acacaaaaag cttttatata  
100021 aaatcctttg cacgataact acttagatct tttatataaa acaggagata tagtggctta  
100081 taatgaacga ggcgagcttt tatgctatgg acgcgcgat aatcagatca aatacatggg  
100141 acaccgcatt gaacttggag aaatagaaaag cgtgatcaac tctcatcaa aagtcaaaaa  
100201 tagtgcttgt atttttaag acaaaattat ttgtttttat gaaagtgatg aagagcttga  
100261 tctaaaaact ttttgcaaag aaaggttagt ttcttatatg atacctata aacttatcaa  
100321 attagataaa tttcaattca atcaaaatgg taaaattgat aggaaagttt taaatgaatt  
100381 tatttgaaga atttgaaaa aactatttta aaggatttaa actaagtaat tggaaatgaaa  
100441 gtatatcaat attgaaagaa aaatttcata aaaaaaatt atctctcgaa agttatgatt  
100501 caaatttctt tttttatgaa aataattctc atcttttata ttacttcatc aacgacacaa  
100561 ataaaaaaaa taaattgaaa cctagtttta ttaaaatttc aataaaacat gaaaagtact  
100621 tagatgacca tttaaatttt atacatctac attcttttaa tgtggaattg gaatgtcaag  
100681 aaatgtgttt aaaaaataaa aatattattt tgcattgatt tccttttatt actcaagcta  
100741 atattcaaga ctatgagcaa atatataatt ttttttgaa gcatttttca aaagatttct  
100801 tattttattt ttcaaaaaac gatataaaaa ataaaaataa tcagattctt atctataaag  
100861 aaaacggcat aattcggggt gcgttaattt ataccctaac aattaagtcc gctttcttgg  
100921 attttattgc agttgataaa aacttacatt ataaaaatgt agcctttgct cttcttaata  
100981 cttattttta gaaaaatttc aacaccatt tatttaact ctttgtcagt gtccataatt  
101041 taaaagcttt aaaattttat cagcgagcag gatttacttt aaatacagct aaaatattgt  
101101 attataaaaa cttttaacaa atttaaaatc acaaaggaat aaaatgcaaa acacattaga  
101161 attaattaag cagtttttta tcaatataga tagatctgat atagatgaaa atatggaaaa  
101221 tcttttaagc gaagatatta tcgatagtat ggatataatg tcttttagttg ccgagataga  
101281 aaaatattat aaaaaacctt taaaagctga atttatttaa gcggaaaatt ttgaaagttt  
101341 tcaaactatc aaaaatatgt tagaacaagc gatgaaataa tatgaatttc attaataaga  
101401 aaaatcaaaa taatattaca acaatctata tactaagatt tcctttattt gaaaaataa  
101461 aaaatatcca tgcacatatt tatgggtgta tagaatatat ttcctatact tttaaaattt  
101521 ttagctttta attctatact acaaaaaaaaa ctttgaatt atccgatcct gaatttttat  
101581 caaaaaattt agaaaatttg ctcaatcaat caaatcaaaa gcaatggaat caaagttttt  
101641 atatgcaaga tattataggt aagtatttag tagaaaaata taccatgaa aaaatcctta  
101701 agctctgcaa aaatttggat aacgaaagta aagccttaat ttttagaatt ctaacaagac  
101761 taaaaaattt tcaaacgaat ccaaattatc aaatcaata cacaaaaaga gaaaaacaag

101821 acctagaaaa acttcaaaat gaattttttt caaatatcct accgatctct aaaggaattt  
101881 ttggatggaa tggatatttt ttacctatca aacaatttga aatttctgtt ttttggcaca  
101941 aacatgctat gcataccttt agcaaccaa ccctagaaaa gataaaaaat aaaaatatta  
102001 ttgatgtggg cggttttata ggtgatagtg ccattatctt tgagaaagaa tttaccaacc  
102061 aaaaagtgtg tagttttgaa gcagttagta aaaattacga tttaatgcta aaaacactag  
102121 agcttaataa tagcaaaaga atcattccag tcaaaaatgc cttaggttct aaagaagaaa  
102181 aattgcaaat cagtatttca ggctatagct cgagcttgaa acacggtgaa tcaaattcta  
102241 attacgaaga agtggagggt ataactctag attccttatat cgagaaaaat ccaatggaga  
102301 taggcctttat aaaggttgat atagaaggat ttgaacaaga atttttaaaa ggtgctatta  
102361 atacaataaa agctcaaaaa cctgcaatgc ttattagtat ttatcacaat cctaattgatt  
102421 tttttgatat taaaccttta atagagtctt ggaacttggg atataaattt aaaatttata  
102481 ggccataga tttttatggt agtttagaaa ctgctttgta ttgtgaaatt tagcaatgca  
102541 aggcaaaact cattttatca tccttaaagg taaaaatttt atctccacaa ggataagaga  
102601 tagaattttc ttgcattaaa gattttcttc cttgtaattt ttcaagcatt aaaggaagct  
102661 cttttttaaa caaagcttta tcggttattc tcataccatg ttttaaactt ttaataaacc  
102721 taccatctat ttgactttca tcttttatca aatacaaagt cgaatcataa cctaacgctt  
102781 tataactttc aaacagcgtt tctttatctt tagatgtgtc aaattcatct tttgcgctat  
102841 gatatcctat gaaaataata ttattatttt ttttagcctg aatttgcaaa tggaaagaat  
102901 tgagtaaagc gcggatcatg taattttcat tggcaaaaaa ataaggtgaa ttttcgtctt  
102961 ctcttgcca ataagtttta acaaacattt ctacgaatgt attaggatta ttaaaaacaa  
103021 attcagatct attgagattt cttcctatta tataatttag aagaggcaaa accgagcctg  
103081 aattatcaat caccatcc acataccaag gagctatttt agctataagt aaagaaagat  
103141 atcctccata tgaccctccc ccataaattt ttggaagatt tttaaaattt ggaaattttt  
103201 tcacaagatc ttttaaaaca ttgatatgat caatagctgc cataatgcca aaattttgat  
103261 aatctccatt aggtggaata aaagttgaag taagtctagc ttgataattt tgcgctaatt  
103321 tcccttgatg ttttaagct gtaataact gattaagtaa ttcataacat tgatgtgcat  
103381 tttcaagact aacactcata ttaatacca taccaataa agcctgagct aatttaggta  
103441 gatcttcttt tgtaaatatt gtcaatgcat tatattcttc atcaatactt cttctagcac  
103501 aaaaacaatg ataaaaaaca tgcaccacta caacatcaaa attttttagca atatactctc  
103561 tatcaaaatc taaaaaagaa atattagcat tagcgccaat cctcctatg ataaaaacta  
103621 tagctctcat ttctttttca tcgtcataac ttatacgata ttcaagtttt gaagttcttt  
103681 taatacccaa ttctacatca tcacaagagt ctattttaaa ggtttgattt ataagcatta  
103741 ttttctatc tgtattcttt tatgtgtatt taaagacaat tatacttgat ttttgataaa  
103801 ataattccca aagaattaag gaaaaaatg aaaaatcttt gcataatacc tgctcgcggg  
103861 ggttcaaaga gaattcctaa aaaaaatattc attgattttt taggaaaacc tttgatcgtc  
103921 tatagtatag aaagtgcctt aaattcgggt atttttgatg aagttgttat ttcaagtgat  
103981 gatgaggaaa ttataaaaat agcttgctca tttggcgcta aagctccttt tgtccgtgat  
104041 gaaaaattaa gcgatgatta tagttctagc acagcagtga ttcaaaatgc gattgaaatt  
104101 tttagctaaa aagggcaagt ttatgacaat gtttgtgctc tttatgccac tgctccttta  
104161 attagcggtg aaattttaaa aaaagcttat gaaaaatttc tagaaaatga aggtaagttt  
104221 ttattttcag ctaccgaatt tgactatcct atacaaaggg ctttttatct aaatgaaaaa  
104281 aatcaagttc atatgtttga tgaaagtttt tacaactctc gctcacagga ttttaacaaa  
104341 gcttatcatg acgcaggagc tttttacttt ggcaaaagca aggcttggct agaaaatgat  
104401 tttttattta aaccctattc tagtgtgtat ttactaccac gaaatttagt ttgcgatatc  
104461 gatactttag aagattttaga atttgcaaaa atactttata aggtaaatta tgaaagttct  
104521 ctttagaagt gatagttcta gtcaaatagg ctttggctcat atcaaacgcg atcttgtctt  
104581 agctaaacaa tacagcgatg taagttttgc ctgcttggca ttagaaggct ctttgatcga  
104641 tgaaattcct taccctgttt atgagcttga aagttcaagc atttatgaac tcatcgatct  
104701 tatcaaagag caaaaattca aacttttaat cattgatcat tatgatatca gttgtgatga  
104761 tgaaaagctt ataaaacttg aaacaggagt taaaatctta agttttgatg atgagataaa  
104821 agctcatcat tgcgatattt tgctcaatgt caatgcctac tcaaaagcaa gtgattataa  
104881 aggtttggtg cttttcgtt gcgagttaag atgtgggttt tcttatgctt taattagaga  
104941 tgaattttat aaagagagca agataaaaag agagaaaatt tgggattatt tcatttgcatt  
105001 aggtggcaca gatatcaaaa atctttctat gcaaatggc tctgatttac ccaaaaacaa

105061 aaaaattgca atcgctacaa gctcgtccaa taaaaatctc aaaaaacttg aaaaattcac  
105121 tcaagatcat gaaaatgtaa agctctttat agatgaagaa atttcaaaat taatgaatga  
105181 aagcaciaaag cttatcatca gtgctagttc tttagtcaat gaggccttgc ttttaaaggc  
105241 taatttttaa gccatttgtg tgcctaaaaa tcaagaaaaa ctagccaatt ggctagtcca  
105301 aaaaggctat gaagtggagt ataggctttg atatatataa aagattttgc tcatttagat  
105361 aaacaagaaa ttttactcgt atggcagtgg cgtaatgatg aaaaaataag ccagtttatg  
105421 aagataaaat atatcgattt tcaagagcat ttaaatttca ttactagcct gaaaaaagat  
105481 caaagtaaaa aatatttttt gggttttaag gataatgaag ctattggcgt aattgatttt  
105541 atcaatcgc cgaaagattc ttgtgaattt gggctttatg caaacctga tttaaaaggt  
105601 atggggcaaa ttttaatgca agaaatcaaa aaatacacct ttgaaaaatt aaaaataaaa  
105661 aatttaaaag cttgtgtttt taagcaaaac aaaagagcct tggatttata tttaaaaaat  
105721 agtttttgta ttaaaaatga ggatgaaaat atgttttatg tagaatttat gggggggggg  
105781 aatagttaaa tttcaaccta aatttcttat tatacaaagg ctagcgggtat gaaaatagcc  
105841 atactcacct cgcctaatac atggttttat cttatgcta aagaacttaa ccaacaata  
105901 gaaaattcca agctttttta taatcataca gagattttta attttgatat agtatttata  
105961 ctttcttatc ataagataat agataaaaaat tttctaaaac acaataaaca caatatcgtc  
106021 atccatgctt caaatttggc ccaaggaaaa ggctgggctc cactttttca tcaagtcata  
106081 gagggcaaaa atgaaatcac cttttcgtt tttgaagcag atgataaagc tgataatggt  
106141 gacatttatc tgcaaaaaaa ctttaaatta aatggcttag aattgtatga agaactaaga  
106201 gaaaagcaag ctcggtttac tctaaatatg tgtttagaat ttttaaaact atatcccaat  
106261 atacaagcaa aaaaacaagt aggtaaagaa agtttttatc ctaaaagaag tccaaaagat  
106321 agtgaacttg atataaataa aagtttaaac gaacaattta atctcttacg catagctagc  
106381 aatgaagatt ttccagcttt tttttacaaa gatggtaaaa aatttatact caaaatttat  
106441 ctagattcta cagggggggg gtaaagcctt aattttaaat cttgaaaact ttaaacctt  
106501 aaataaaaca aaaaaagaga aaattagact ttttagaaat cacccaaata ctaaaaaata  
106561 tctatataat cagtatttta tctccaaaag agaacatttt aattttattc aaaaattaaa  
106621 aaagaattct aaaaaaactt acttttgttt gagtttaaat catataattt taggaagtat  
106681 caatcttgac aaattaaaca aaactacagc aagctttggt ttttactcca atcctttttc  
106741 acatcttagt ggcttaggaa gaattttaga gcaaagctct atatatatag cttgtaattt  
106801 tctaaaaata aaagtcctta aattagaaat ttttcaagaa aacttacagg ttatcaattt  
106861 gcacaaaaaa tttggttttg ccattaccaa agaacaatc aaacatgata aaaaaatttt  
106921 tataatgcaa ttagtttttt aaaaaaagtc gatataatgc aaaacaagaa caaaaaagg  
106981 caaatcatg caaataggaa attttaatac cgatgaaaaa gtttttatca tagcagagct  
107041 atccgcaaat cactcaggaa gtcttgaaat ggcgcttaaa agcataaaaag cagccaaaga  
107101 agcaggagca gatgcgataa aaattcaaac ctacactcca gatagtctta cgctagattg  
107161 tgataaagat gattttatca tcaaaggggg gctttgggat cagcgcaaat tttatgaact  
107221 ttacgaaagt gccaaaacc cttatgagtg gcattctcaa atttttgaag ctgcacagga  
107281 tgcaggcata ctttgttttt caagcccttt tgcaaaagag gatgtagagt ttttaaacg  
107341 cttgatccc atcgcttata aaattgcctc ctttgaagca aatgatgaaa atttcgtgcg  
107401 tatgattgcc aaagaaaaca agcctacat tgtttcaact ggtattgcaa gcgaagaaga  
107461 gctttttaaa atatgcaaaa ttttcaaaga agaaaaaaat cctaactctga tttttttaa  
107521 atgcacctca gcttatccag cacaaatttc tgatatgaat ttaaaaggca ttataagttt  
107581 aaaagaaaaa tttggcgttg aggtagggct tagcgatcat agctttggac acttagctcc  
107641 tgttatggca gttgcacttg gagctagagt gatagaaaaa ctttttatgc ttgataaaaa  
107701 tataaaaagc gaagatagca aattcagcct tgattttgat gaatttaaag ccatggtaga  
107761 agcagtaaga gaggctgaaa gcgctttggg cgatggctct ttagccttag atgaaaaaag  
107821 tcttaaaaac cgcgtttttg ctagaagttt atatgcaagc aaagatatca aaaaaggtga  
107881 aatttttagc gaagaaaatg taaaatcagt gcgtccttct tttggacttc atcctaaatt  
107941 ttacaaagag cttttaggaa aaactgccac taaagatata gaatttggca cagctttaa  
108001 acaaggagat tttcaatgaa aatcctagta acaggtgcag atggttttat aggctctcat  
108061 ctttgtgaga gtttggttca aaaaggctat aaagtaagag ctttaagtca atataattct  
108121 ttttaatttt ggggacattt ggaaaaaagt ccgtatttaa aggatatgga agttgtaagt  
108181 ggggatttaa gagatagctt tttttgtgaa aaaatcactc aaggaatgga tgccattttt  
108241 catcttggag ctttaattgc cattccttat tcttacgagg caccgcaag ttatgtagat

108301 actaatgtaa aaggcacttt aaatatgcta gaagctgcga aaaaaaatga aatttctcat  
108361 tttatacaca cttctacaag cgaagtttat ggcactgcaa gatatgtgcc tatcgatgaa  
108421 aagcaccctt tacaacctca aagcccctat tctgctagta aaatcgcagc ggatatgatg  
108481 gcgcttagtt attataatgc ttttaattta aatgtaaata ttgctcgtcc tttcaatacc  
108541 tatggaccaa gacaaagtgc aagagccatt atacccacta tcataacaca aattttaagt  
108601 ggggtaaaag aattaaaact tggggatttg agtccgacaa gggattttaa ctttgtcctt  
108661 gatacttgcg aaggctttat ctcgcttttg aaattaaatc attttggaga agtgtataac  
108721 ataggctctg ggactgaata ctccatgcaa gaagtgcctg atcttataca aaaaattcta  
108781 aatcaaaatg taaaaatcat ccaagatgaa aaaagattac gcccaaaaaa tagtgagggt  
108841 tttagactaa aatgcgattc aagcaagctt caaaatgcaa cccattggca aagcaaaata  
108901 agtcttgaag aaggcttaaa actaagcata gaatatttta aagaaaattt agcaagttat  
108961 aaaagtghaa tttacaatgt ttgaaaatga aatcactttt atcaaaaaac ttttcaataa  
109021 agaaaaaatc gctttacatg aaccttgctt tatcggaat gaaaaaaaat atctcttaga  
109081 atgcattgat agcggttttg tttcaagcgt ggggtgagtt gtaacgcggt ttgaagaagc  
109141 tttaaaacaa agaacaaaag ctcgatttgt catcgctaca aatacaggca ccgccgact  
109201 tcatatcgct ttacttgcaa atggatttga tgaatttgt gaggtgatta cccaaagcat  
109261 tagctttggt gcaacggcaa atgccattgc ttacacagga gctagggcta tttttttaga  
109321 tattgatgaa aatactttga gtttaagtcc taaagcttta caaaattttt tagaaaatca  
109381 cagctaccaa aaagatggct ttacttacia taaaatcaca cataagcgca tcaagcttg  
109441 cgttgtaatg catacttttg gtcttagtgc taacatagaa aagctttgcg aaatttghta  
109501 aaattataat atttttttta tcgaagatgc cgccgaagct ttaggaagca cttataaaaa  
109561 caaggcttta ggtacttttg gaaaatgtgg aattttaagt tttaatggaa acaaaatcat  
109621 cacaggtggg agtgggtggag cgattttatg cgatgatgaa aatttggcaa atcttgcaaa  
109681 gcatttaagt actactgcta aaatacctca tccttatgaa tacgatcatg atatcatagg  
109741 ctataattat agactgtgca atataaatgc cgcaatttta cttgctgggac ttgaaaagct  
109801 agatttcttc ctagaaaaca aaagagaatt ggcacaaatt tataaggaat tttttgcaca  
109861 tcataaagct tgtaaattta tagatgaaag aaaaaattca aaaagtaatt tttggctcaa  
109921 tgctttatgt tttaaagatg aaaatttaag aaatatattt ttacaagaat gtttaaaaaa  
109981 caatatcttt gcgctgcctg tatggaaaag cttgcctagc cttaaacctt ttcaaacttg  
110041 gcaaaaagat gagcttttaa atactcaaaa attagaaaaa tgtttggtta atttacctag  
110101 cagtgtaaga ttagataagg aaaaataatg aaaaaattta taaataatga agaaatttcg  
110161 aacaatattg ggactaatga agaaatttgg gaaaatattt tttccaataa agaatgggga  
110221 aaatatccta gtgaaaactt gataagattt atagctagaa atttttataa tgtaaaaaat  
110281 agaaatghaa ttcgtattct agaattagga cttggtacgg gagcaaatth atggttttgt  
110341 gcaagagaag gtttttagagt aagtggattt gaatggagta aaacaggagt agaaagattt  
110401 caaaagcgtt taagtgatga aaatttaagt tctcaaatag atgagataaa aattggagat  
110461 tatgagcaaa aattggatga atttaaagat gagagctttg atgcatggat agatagctat  
110521 tctttggctt ataattgattt taaaaaaaca aagactatta tagaaaaagc catctcaaaa  
110581 ctaaaaagtg gagggaaatt tttttccata actcctagtt ttaataacga aggccttgaa  
110641 aaaaatghaa atttgggtta tcatgaatgc aaaccaactc ttggaagtga cgcatttaca  
110701 ggcgttataa gatattgtga tgaagaagat ttaaaagaac tctataatgg caaaaattat  
110761 caaattaccg atattaaaat tgctcgtttt gctagcctag aaaaaaatct taacgagctt  
110821 tatattattg aaggacaaaa attataaatt atgcaaaaca tactttttaa acaattttta  
110881 gaagaaagaa agaaaaagta taaaaatgga atttatcatt atactcaagt taatttttcg  
110941 tataattcaa accatatcga aggaagcaca ttaagcgagg aacaacaag atatatttat  
111001 gatagaaact ctttttttagc caatgaaaat caaattatca atactaatga tatttttaga  
111061 actaaaaatc attttttagc ctttgatttt atcttggata gtgtttttga tgaattaat  
111121 gaagcatata ttaaaaagct tcatagtatt gttaagaata attgttctga tattgaaatt  
111181 attggagaat ttaacaaag gcaaaattac gtgggcgatt taaaaacttc tgctccgcat  
111241 cttgtaaagg agcaccttga aaaactattt cagggttata aagtacacaa tatagaggat  
111301 attatagatt ttcattttca ttttgaaaaa atacatcctt ttgaagatgg caatggcaga  
111361 gtgggaagac ttttaattgtt taaagaatgt ttaaaaaata atactactcc ctttattgtc  
111421 gatgaagaac acaagttggt ttattatagg gggcttaaaa attatghaaa ccaaaaaggt  
111481 tttttaatcg atacttactt atcttgtcag gataaatata aagaaatctt aaattatttt

111541 caaatcgtct gctaaaaaag caagtgaaaa atcaaatttt aaaaaacaag gaggaggtaa  
111601 aataaaatat gaataatgct gcgttttggg aaaatatttt ttccaataaa gaatggggaa  
111661 aatatictag tgaaaacttg ataagattta tagctagaaa tttttataat gtaaaaaata  
111721 gaaatgaaat tcgtattcta gaattaggac ttggtacggg agcaaattta tggttttgtg  
111781 caagagaagg ttttagagta agtgggtattg aatggagtaa aacaggagta gaaagatttc  
111841 gaaagcgttt aaatgatgaa aatttaagtt ctcaaataga tgagataaaa attggagatt  
111901 atgagcaaaa attggatgaa tttaaagatg agagctttga ctgcataatc gatagttgct  
111961 cgctttgttg caataacttt gaaaaaacta aacacatttt tgataaagcg attttaaaat  
112021 taaagccaaa tggaaaattc ttttcaagta ccatagcaaa aggtattgta ggatatgata  
112081 agaacaaaga agattttcaa cttccaaatg atggaattta cactcatgtg ggaatgatac  
112141 gcttttcaaa caaggaagat attcaaaagc tttataaaaa tgataacttt aaacaaacca  
112201 gtcttaaagt tcaaagcatt gaagataatg gcgccttaat cgataaactt ttcacatag  
112261 aaggagaaaa aaatataatg ggggggggga actctaaaaa actcctacaa ggagtggaaa  
112321 atgagtagaa tttttttaga agatttttta aaaaatcaca aaaactactc ttatctttta  
112381 gatgatattt atttaataaa aaaatatgca agtctttatg gagaagtatt tgaattttct  
112441 taccaaaaag aagtaaaatt atttaaaatg attgctatta aggaaaaaat tccaaataca  
112501 aaatttttac atttgcaaag cccttatgga tatgggtggga tttattgcaa tgttaatgat  
112561 aaaaatttta taaaagaagc tcttgaaaat ttaaaactta aagctgtgga gcaaaatatt  
112621 atagcttttt ttatccgttt tcatcttttt gatgaaaatt taaaaaacta tcattatctt  
112681 ttgccttttt ttactaaaaa taaagaaact attatcgtaa atacaaatga aaatatagaa  
112741 aatattcgta caaattatag ccctaggata agatcctata ttaaaaaagc aagaaaagaa  
112801 ataaatatag aatttgccca aaaggaagat tataaagact ttttcaaact ctatacacac  
112861 actatgcaaa gaaataatgc ggataaattt tattttttca atgaaagata ttttgaaaaa  
112921 ttattcaatt tcaaagaaag cataatttta aaagccagtt tagataataa aatttttagct  
112981 tttgcttcat tttttctttg tggagatttt tcttattatc acctaagcgc caattcgtta  
113041 aaatctaacg ccaatgcagc tttgcttgat tttttctttg aatatgccaa ccaaaatgct  
113101 tgcaaatfff gttttttggg cggaggagtg caaaatgaag atacactttt taaatttaag  
113161 gaaaaatfff ccacactaag ggcaaatfff tatgtgggtg gcatgatttt taataaagaa  
113221 gaattcgatt ttttaataaa aaacttcaca aataaatact ttttaaaata ccgctttgac  
113281 gattaaacat catgtttatac agctagttgt tatccttaat ttttactaaa ctataaagta  
113341 tatttaattt ttgttatata ttaacaaaaa ttaataataa aataaattta taagtaaaat  
113401 atcagagata aaaaacctga agcaaaaacg atccctagaa acagagttgt aaataatcta  
113461 aacataagta aacttatcta taacaaaaa aacaaaactt tcaacaaaaat agatattcat  
113521 ctttataaat caaacctttt tactgcacaa ggaaatacaa tttttatgca aaacatcaaa  
113581 aaaatattat tatttaaaat aaaacagaat actttttgct atctttgtta taatgacaag  
113641 taaaaaatac tatgtttcgt aataaaaaata gtatttttta cctccatata aaaggcaaaa  
113701 aatgaaaaaa agctttaatc atagcagaag caggggttaa tcacaatggt gatttaaatt  
113761 tggccaaaaa gctgatcgaa gttgctgcca aaagtggagc tgattttgtt aaatttcaaa  
113821 gtttcaaagc cgaactttgc gtgagtaaaa atgctaaaaa agcaacttat cagttaaaaa  
113881 ccacagccaa agatgaaagt caattagaaa tgattaaaaa actagagctt gactttaacg  
113941 cacaccagct tttaatctct catgctaaac aatgcggtat tgcttttctt tcaacgcctt  
114001 ttgattttaga aagcattgaa ctttttagatg atttaggact tgaagttttt aaaattccaa  
114061 gtgggggaaat cacaaattta ctttatctaa aaaaaattgc aaaattaaat aaaaaaatca  
114121 tactctccac aggaatgtca aatttaggcg agatagaagc ggcttttagaa gtactttgca  
114181 aagaaggcac ccaaagagca aatatcacc cacttctactg cactaccgaa taccgccac  
114241 cttttgatga ggttaattta aaagctatgc aaaccttaaa aatgctttt aatcttgatg  
114301 taggctattc agatcacacc aaaggtatac atatttcttt ggccgctatc gccttagggg  
114361 caagcgtgat agaaaagcat tttaccttag ataaaaatat gtcaggacct gatcataaag  
114421 cctcttttaga acccgatgaa ctccaagaac tttgcactaa aatcagagaa atcgaaagtg  
114481 ctttaggcga tggcataaaa caagcaagca aaagtgaaag gaaaaatatc gaaattgcaa  
114541 gaaaaagcct agtagctaaa aagaaaatta aaaaaggaga aatttttagc gaagaaaacc  
114601 ttaccacaaa acgcccgtct agtgggtataa gcgcgatgcg ttatgatgaa tacttgggca  
114661 aaaaagccag taaagattat gaagaagatg agctaatacca tgagtaaaag aaaaatttgc  
114721 atagtcatgt caacaagagc tgagtgggat cttttaaaaa atttatgcct tgaatacaaa

114781 aatgatgaag acttagaact tcaaattatc gccacaggag cacatttaag ccccgaaattt  
114841 ggactaacct ataaagaaat agaaaaagaa tttaaaatcg ctaaaaaaat tcctatttta  
114901 ctcgcaagtg atgataaaat aagcctttgt aaagctatgg ctttggcaaa tattggcttt  
114961 agcgaagcat ttgaaagcctt aaaacctgat atcgtagtaa ttttaggcga tcgttatgaa  
115021 atgttaagcg tggctagtgt gtgcttgatg atgaatcttc ctatagccca tctttgcggt  
115081 ggagagctta ccttaggagc cattgatgat agcataagac atagcatttc taaaatggca  
115141 catttgcatt ttgtaagcac ccaaacttat aaaaatcgtc ttttgcaact tggagaagaa  
115201 gaaaatcgtg tatttaatgt cggatctttg gcaagtccta ttataaaaaa tatcaatttt  
115261 ttggataaaa atgagcttgc aaaagtcttg gaatttgact tagagcaaaa tatttattta  
115321 attacttatc atcctgtaac tttaaattta caaaattcta aaaaagaaat cgatatttta  
115381 ttaaaaactt tagataaact taacaatgca agtttgattt ttaccaaagc caatgcagat  
115441 gaaaatgggc ttttaatcaa tgaaatttta aaagattact gcgaaaaaaa tcctaaaaaa  
115501 gctaaacttt ttgacaatct tggctcacia aaatatctta gcattatgaa aatagccaaa  
115561 gccatgatag gaaatagctc aagcgggata agcgaaagtc ctttctttaa aacccttgt  
115621 atcaatatag gatcaagaca aaaagggcgt ttaagaactc aaaatatcat tgattgtgaa  
115681 tttgaaaatt tagatcaagc ttttgaaaaa ctagaaagca aagattttta acaagcattg  
115741 tatcatttta aaaaccctta cgaaaatgac aaaaatccaa atataatcat aaaaacttgc  
115801 ctaaaaaacg cgaatttggg tacaatttta caaaaaaat tcattgattt aaggtaaaac  
115861 cttggatata aataaactca aactcacacc tgattctagc attgaagaag ctttaaaagt  
115921 agtaggacaa gaacgcgttc gccttggat cattgttgat aaaaaggata atttcttagg  
115981 tgtgatcagt gattcaaaca tcagaaaagc tttgataaag ggtaaaaatt tacaagcaa  
116041 aatcaaagac atctatacta aaaatcctat taccatcaaa gaaaatacaa gcaaaaatga  
116101 acttttaaaa ctaagcgaag agactgatat ttatgatttt cctgtgctaa atgacaaaaa  
116161 agaagtcatt tctataaaat ccatttcttc cttaactaac cgccaagtaa attcaattt  
116221 tgtcatcata atggcaggtg gacttgggaa ccgtttaaaa gaactgacta aagatactcc  
116281 aaaacctatg ctaaaggttg gaaaaaagcc tatttttagaa agtatagtgc aaagattaaa  
116341 agagcaaaat tttgaaaatt tcatcttttg tgtaaattat aaaaagcaaa ttatcgagga  
116401 ttattttaaa aaaggtaaag attttggat aaaaatttct tatatcaaag agcgcaaaaa  
116461 actaggtaca gcaggggctt taagtcttat caagcaagat tttaaagaaa gctttatcgt  
116521 aatgaatgca gatattttta ccgagctcga ttttaacgag cttttaaaag cgcataaaga  
116581 ttctaaagct ttaatgagcg tatgctgaag agaatttgag cagcaaattc cttttggagt  
116641 gatagaacaa aataaaggct ttatcacaaa tatcacagaa aagccgggtgc aaaaattttt  
116701 agtgagtgca ggaatttatg tatgtgagcc tgaaatttta gaacttttaa ataaaaacga  
116761 ataccttgat atgccagagc ttattaaact agctatgcaa aaaggcaggg taaatactta  
116821 tttaatccat gattattgga tcgatatagg aagacttgat gagtttgtca aggcaaatga  
116881 ggaattttaaa tgaaagtttt aatcataggc tttggaagca taggaaaaaa acatttttta  
116941 gccctaaatg aacttggatt tttagtagat gtgctttcaa aaagctatga attttcgcat  
117001 tttgaaggta aaaactttag acttttttaa gatttagaag aattaaattt acaagattat  
117061 gacttattta tcatcgcaaa tatcactaca agtcatttta aaactcttga atttttgat  
117121 caaatgtaa aagaaaaaat catacttgtg gaaaaacctt tatttcaaaa ggatatggag  
117181 tttattccta gcaacaataa tcaaatttat attgcttatc ttttaagatt tcatcctatg  
117241 attcaagatt taaaacaact cattgatgaa aaagaagttt attttgctaa atttatttgc  
117301 aattcttatt tgcctaattg gcgaaaactt gattataggc aaaattatag cgcaaaaaaa  
117361 gagctaggtg gaggggtaat gcttgattta tcccatgaga ttgatttggc tttttatttt  
117421 tttaaagaac tttcttttaa attttctcaa aatttaaaaa tttcagagct tgaataaca  
117481 agtgatgatt ttactttttt ggcattgagt gcgaaaaata cttcaattca tatcgagctt  
117541 gattattttt caaaattaac tcaaagaaaa attctttttc ataccaaga aaatagcttt  
117601 gaagccgatt tagttcataa taaatataat atttatgata aaactaacia ttttaaaagt  
117661 aaaacttatg aaaatgatac ttttaaaacc ttgcaaaata tgtataaagc gatcctagaa  
117721 aaggatcaaa atttatgcac tttagaagaa gcaaggaggg ttttaagatt gtgtgatgag  
117781 gcaagaaatg ggtgaaattt tatgcacaat ttgtgcaaga ggtggaagca aaggcgtaa  
117841 aaataaaaaac atacgcaaga ttaacgatct tgagatgata gcttatagca ttatccaagc  
117901 taaaaattca aagctttttt aacatatcgt tataagcaca gatagcgagg aaatagccaa  
117961 aatagcgcta aaatatggcg gcgaagtttt tttcaaaaga gaagctcatc tagcaagcga

118021 tacagctgct aaaattcctg taatgctgta tgctttatta agaagtgaag agtattttta  
118081 atgccaatth gacgccctaa tcgatcttga cgcttcagca cgccttagat caagtagtga  
118141 tatcataaaa gcttttgaaa cttttgtca aaatcaaaat gataatctaa tcaccgctgt  
118201 tcctgctaga cgcaatcctt attttaatct aatcgaagtg caagatggaa aagttgtaaa  
118261 atccaaatca ggaaatthta ccacacgcca aagcgcacct aaatgttatg atatgaatgc  
118321 aagtatttat atattthaaa gagatthttt actgcaaaat gacagcgttt ttggtgaaaa  
118381 tacagggcct ttcatcatgg atgaaagcac tgcttttgat gtagatagcg aacttgattt  
118441 taaaatagta gaatthttga tcaaagaaaa aaacttacia gcaaaggatt tttaatgcta  
118501 gaaaataaaa ttatctttgt agcaggagct tgtggacgca taggcaaagc actttgtaaa  
118561 aagatattgc aaaacaaagg catagccatt ttagccgata tcaatgaaaa tcatthtacc  
118621 atattthaaa cagaacttga aaatgagttt aaaaaagagc ttttaagcct taggcttgac  
118681 attacttcta aggaaagttt aaattatgct atcgatcaag cttthaaaaa atactctaaa  
118741 atcgatggct ttgtgaattc tagctatcct gtaggaaaag attggggcaa gatagcttat  
118801 tatgaagcct catatgagca aatthgcaa agttthaaatt tacacttggg gggatttatc  
118861 ttagcttgc aagaatthgt gaaatthttt aaaaaacaaa gctatggcaa tatcatcaat  
118921 cttagctcta ttatgggggt ttttgccccc aaatthgaaa attatgaaaa taccgccatg  
118981 caaagttctt tagaatacag cgtgatcaaa gcagggatta atcatcttgg tgcttggctc  
119041 gcaaaagagc tttthatac aaacattcgt gtaaatacct tagcaagtgg tggaaatthta  
119101 gacaatcaag ccaatthttt tttagaaaa taccgcaaat gctgcaag caagggtatg  
119161 ttagatgcag aagatthttg cggaaccttg gtatthttac tcagtgatga gagtaattht  
119221 atcacgggac aaaccttagt ttagccgat ggatggggac tttaatgaat aatgaactth  
119281 tctthaaaaa tactcaagca cttthtgaag tggatcaaat tttagcttat gagttaagaa  
119341 gaattaagca ttgtthtaat ttcgcattac aaggcgataa tctagaaaat cttaatataa  
119401 tccatctatc tagcaaagaa agtattthata aaaatcctta tgaagaatta agcaacaatt  
119461 taactthttt caagcaagaa tactcctaat atcctactth atthttttat ggtttgggta  
119521 gcggtgctgt ttataaagcc ttactcacia accaaaatca caaacaactc atcgtthttg  
119581 aaagcgagct tgagctthtt tacttggctt tcatctatt tgattthtagc aaagatatta  
119641 gaaatgaaag attgatttht tttatacac ccaactthaa taccaccag cttaatgctt  
119701 tgctaaatca thaaaaaatt aaattcagca thaaaactta tgattthcat atthcatagcg  
119761 aatthttatc thctcattat aaagacatca thcaaatct taatcaaagt cttattgaaa  
119821 tcatcaaatt tatagtccta gcttatggta atgaccta agattcgc atagggcattg  
119881 aacatactth aaaaaaccta aatacttag tttatgggag tgtthttcaa cactthttta  
119941 aatataaccg tgcaaatcc aaaaatgcca tcatcgtthc aaccggcccc tcaacthcaa  
120001 acaactctc tctthtaaaa gaatagcct caaagcaac gatctthttgt gctgattctt  
120061 cttatcctat acttgcaaga gcgggtataa agcctgatta tgtcttaagt cttgaaaggg  
120121 tagcggcaac aagtgagtht tthtaaatg atththaaaga atthgataaa gatattthtat  
120181 thctaatcac atcagtaacc catgaaaata cctthaaata tcttgagaaa atcatagaa  
120241 attatagct tgtattaaga cttthgctth tttcthca tthaaatta gatgatttht  
120301 gttatcttgg tgtaggaatg agcgttgcca atatggctta tgaattggct gttgctthta  
120361 gacatgaaaa tatcatthta atcggacaag atthtagctta tgatgattta ggacattctc  
120421 acccaaaaga tcatattht ggagaacaag gtgataaatt tcaagataaa cttagtgta  
120481 gagcctatgg gggcaaagga cttgtthaaa ctcaactthc ttggcaactt thcagacaaa  
120541 gttthgaaaa agatatacct cttgtthaaag aaaagctaca aattactaca tataattgca  
120601 ccgaagggtg agcaaggata gaaggaagta tagaaaaacc tththaaagaa ctttgthgaa  
120661 gtatacttga taciaatthta gaaaaactth ttaagaatga tththagtha gaaccxaaag  
120721 aagcgcaaaa aatthtagaa aaaacaaaaa aacactthct aatcaagta aaaataagta  
120781 aaaatthaat agaagaaatt caaaataaac tcaagactth gccaaatatt thaaacgaaa  
120841 aagatatcaa tttggattth aaaaaactta agaaattaga gcttgattth caaagcttgg  
120901 ctacthaaat gaaaagctat ggccttatga gcgagcttht acaagctthta gttthctac  
120961 aagagtgtga tctththaaa ctthaaagta agccttgcaa aaaccaagaa gaagaacaaa  
121021 acaaatthtt gctthgttht aatatcatc atgaaaaatt cagtgaattg atthtatata  
121081 tgcaaatca aaacgaactc atagaaaaat acatcthaag gagagaaata tgactthttac  
121141 agaagagcaa aaaaatcgtt ataaaaaaa cthcaacgcc ctatctgata acctthctc  
121201 thaaaaagat cttgcaaac tthcthaaag thaaaaatth aaatctctac aagggaaga

121261 tccacttgat ataaatcttt taaacacctt tactcacaaa aaaatttaca acaaaccctt  
121321 agaagagcta aatgctttgc ttgcaagcta taatgaaaaa tacatttctat accctgtgct  
121381 ttatTTTTat ggTTTTaggca atggcatact ttataaggct ctttTgtcaaa accctaaatt  
121441 acaacacatc atcattTTTTg aaaatgatag agagcttatc tttacaagct tgcattctat  
121501 tgacttatct caagaaatca aagaaggaaa aatccacatt ctctcttcta aaaagaacaa  
121561 agagcaatTT ctttctatTT ttaatgtcca gcctTTTTta aattTTTTta gggTgtatTT  
121621 tttagaactt catagcaatt attatgaaag tgaacatgat gaaatcatca agctcaatca  
121681 agacatacat cacgccatca aagaagcagt atgCGTgCGc ggaaataatc caaaggatgc  
121741 cttgcaaggc atagaacaat ttatTTTTta cttgcctaac atgcttacc atcctaacgc  
121801 taaagaatta atcaatacaa gaaaaggcct tgataaaaaat gccatcatcg tttcaaccgg  
121861 cccctcactt acaaaacaac tctctctttt aaaagaatat gcctcaaaaag caacgatctt  
121921 ttgtgctgat tcttcctatc ctatactTgc aagagcgggt ataaagcctg attatgtgat  
121981 gatgcttgaa agaacagata tgacagctga atTTTTtaat cacgattttg gtgactttga  
122041 taagggcatc atctTTTTgta ttgctgcttt ggtacatcct aaggctattg agtatttaga  
122101 aaagcaaaat cgaacctata ttttaattga aaaatcactt cttttgaaa gctatatgaa  
122161 gctacattct tttggttatt taaacttagt ttcaagtTgT gcacatatgg cttatgaact  
122221 agctatggct ttaaaatttg aaaatatcat ttttatagga caggatctag cctatgcaaa  
122281 agatggTtgc tctcatccaa aagactatca aaactcacct acttatgaaa caaatatgta  
122341 tgaacatctc tcaaccaagg cttatggTgG aaagggcgag gtaaaaactc attttTgatg  
122401 gaatatgttt cgcaccattt tagaaaagca tatcatcaac actcAAAAa ctatcaaggT  
122461 ttataattgc accgaaggTg gagcaaggat agaaggaagt atagaaaaac cttttaaaga  
122521 actttTgTgaa aatttattga ctaatgattt aaataaacct tttccaagTc ttaatcttcc  
122581 aagtcaagat aagcaaaatg aaagaatgtt aaaggccttt tacaaaattc aaaaaagcat  
122641 tcaaaattgc gataaattag aactTTTTgt ctagaaaaa caacaaagca ttctagaaaa  
122701 aatcaaccaa gaagaattta aaaacctaag ctatgatgat aaagaattag ctcaaggTat  
122761 cattgaagat atcgatactt taaaaaatga aatagaaaaa atccacactt tttatgaaga  
122821 tctgggtgaa attttacaac ccctatactg tcaatttgag ttttaatttg caaaaattta  
122881 tgTTTTaaat ccactgacaa aagaagattg ggtaaataaa actttattgt ggattaaaga  
122941 gcatttgatg tggattgctt atattTTtaat acatcttaaa gctcaaaaac aggctttaca  
123001 aagcagtatt ttgcctttag aaaatgaact tttacaaaga aattTTtaagc acttacttga  
123061 taaaatcaaa aggaaaacaa aatgaaaaca acagatatat ttgaaaaaaa tcttctttct  
123121 ctttcaggaa aagaatacga gaatttgatt aaaaaactta aaaaaatcaa agaaagtaaa  
123181 aaattttctc ccctTTTTga tgctaaagat ccgcttaatt taaacatcat agaaaactcc  
123241 actaaagaaa aaatttatca aaatcctttg aaagaattag aaagcaaaat cgatctcatt  
123301 caaaaaaaat accttaaaata tcccgtttta tttttttatg gcataggcaa tggctTTTTa  
123361 tataaagcct tattacaaaa ccacattttt aaacgcatta tcatttttga aaaagaaatt  
123421 gaactcatat ttcttgcttt aaatttagcc gattttacc aagagcttaa aaaggaaga  
123481 ttgattatca ttttaagcag tgaatgaat gatactaagg cgaattctt atttctttg  
123541 cctgaaataa aattattgtt taaatcctat tttttggatt tgcattcaga tttttatgaa  
123601 aaatactcaa aagatattat caaatcaac aatatcaata aaaatatgat tatcttctc  
123661 tctctaagac aaggcaatga tcctaaagat gccttgcaag gtgtggatca atttgtaagg  
123721 catatacctc atatgatcac tcatccaagt cttagtgagc tgattaaaaa aagatataaa  
123781 aaggctaaaa atgccatcat tgtagctact ggtccaagcc ttcaaaaaca aattccactt  
123841 ttaaaaaaat accacaaaaa agctagcatt ttttTgtctg atgcttctta ctcgatcttg  
123901 catgaaaatg atatcaaacc tgattatgtt ttaagccttg aaagagtggT ggcaacaagt  
123961 gagTTTTTTa acaatgactt taaagaattt gataaagata tattgtttat ctttttaacg  
124021 cttaccatc cacaaacct caaatatcta gaagctaata aaagatctta tatacttaca  
124081 ccaagagact tgcctTTTTc acaaagcatt aaacatttaa aagaattctc atcgcttaat  
124141 ggaatgagTg tggcacatat ggcttttagt ttagcttatc atttagggca tgaaaatgtg  
124201 attttaatcg gacaagatct agcctttgga aaagatggat cctcacactc aaaaggctat  
124261 ggcaagagTg aagagctagc taaaaaagaa acacaggctc tacctcaaac taaagtaaag  
124321 gcttatgggg gtaaaggTtt agttaaaaca acgacgattt gggagctttt tattaaggTt  
124381 tttgaaaaca taactactat catcaatgca caaaaaaatt gcactattta taatgtcaca  
124441 gaagggggTg caagaatagg tggaaaccata gaaaaacctt ttaaagaact ttgtgaaaat



124501 ttactggata aagagcttaa aaaacctctc acaaaggtca ataaattaag tagaaaagag  
124561 caaaatcttt tacttttaaa atcctataaa caaatcaaaa ctttcatcaa aagaagtгаа  
124621 aaaatcgcaa aagaacttag aaaaactgga aagcagatta gaaatttaac ccaagagatc  
124681 aagcaaaaat acaaattaga gcaaatcagt aaaaatatag atgagattaa aacaaaactt  
124741 gcaagtagca attatgctta tttggctgaa gttttaggac caagtgttta tcatgcagaa  
124801 agctctttgg gtgagcttta tttgcaaaat attagcaatg aaagcgataa acaaaaacaaa  
124861 ctcatgtctt ggattttatgc acatgaagct tggattgatg aagtgcataa tttaatcatc  
124921 ttgcaaaaata gcgttttaaa aaatgccatt atacctttaa gagatatggt agaaaaaaga  
124981 aagcttgtgt aatcgctcta aaaagagcga tttttattgt aaaagtttta aaacattttg  
125041 ttgtacagca ttggcctgac tcatgcgata agatccactt tgagctagga tattgtattt  
125101 agaaaaattt gcactctctg cagcaaagtc tacatctctg atggttgatt cagctgattt  
125161 aacattttact tgagttacag taatgtttgt gatagtaact tgaagttgat tttgcaccga  
125221 gcctatatct gctcttattt ggtcaagatt gattgtagca gtttcagcta tatccatcac  
125281 agccatagca ctttttagag ttgtaacccc tgcagtttta tccgttgaac ctagcgcagt  
125341 agctttcatt tgagcaaatt gagattgtcc tgatccagca gaaaaaccac tgccttcaga  
125401 tacattataa aaattactta gcatagattg agcatttcca acaaaaaccaa cattagcact  
125461 tagcattaca gacatatttt taccactacc tacagaaaaa ccagaaccag cactcatacc  
125521 agaaccagct gcactcatat atgaactgat agaagaataa tccgctaaga atcttccgcc  
125581 accttcatag ttgttaaatt ccatagcatc agcaatttga gctgaaattt gtcccttagt  
125641 ttctcttaaa gatactgaag attgagaaac catttgacc tctccaaaac ctgctgctga  
125701 aagtccagtt cctgaaatcg ctatatctct accatcgttt ttaacaagag aaagacggcc  
125761 ataattttct gcttgttctg ctaaaatacc catacttggg gtaaaaccac tgactttaat  
125821 acctctacc tctcttgaag taagaaccaa tcttccatca tcaactcaaag aagcctcaac  
125881 cccagtagta tcttttacag cattgataga agctactaaa gatccatttt tatcacctgc  
125941 ttcaaattct attttaccga ttttcaactc attgattgta aatcatctg tagtgtttcc  
126001 ttttghtaag gccattgcac caacagtttg cacattaaaa ctagctctaa cgcctgtttt  
126061 atcagcatat ttattgatct cttcagccaa agctccaagt cctgttccta ctgaagtaga  
126121 aataacaacg ctttgaatt taaagtcttc tataccatta tagtttttaa tagtaatttg  
126181 cgcagtagca ctgtctgaaa tctgtgttcc cgtttcaaat cttgttacac cgattttaga  
126241 agactgagtc gctccgattg aagctttgat ggtttgattt gactgtgcac cgatttggaa  
126301 ttcttgattg ataaaactac cacttaaaag ttgtttaccg ttaaataag ttgtatttgc  
126361 gatattgtca agttcttcca tcaaacgatt gatattctgt tgaagcatag ttcttgtttt  
126421 taaactttgt ccatcttgag ctgcttgagt cgctttagtc ttgatagtat ctaagatttt  
126481 aagttgctca tccatagcct tatctgcagt ttgcaagata cttgctgcat cgttaccatt  
126541 gtttatagct tgacctaaag tagaagcttg agttcttaag ctatctgcta tcccatccc  
126601 tgaagcatca tctgctgcag agttaattct aagacctgaa ctaagtcttg caagcgattg  
126661 atccaatgct ttgctattta gatctgagtt tgcttttagca tttaatgctg caacgtttgt  
126721 gttaatacga aatcccattt taaatccttt taaatgaatt caaactcatc catgagcttg  
126781 ttactcacta tatcgtttag aaaaaaaaaat actttatagt tttttgtaaa aatttatatc  
126841 aatttctcat attctaacat tgcattccctt ataataaagg atttcatctc taatttctcg  
126901 ataaactttt caagccattt ttgataagca tgaatcaaac ttaaaaaata atgtgtttca  
126961 tcctcaaatc ttttttttat aacttcagat aaaaaattcc cacgatagcc aatgttccct  
127021 tttaaaacat catcttgtat aaaagtgtta ttatctaaaa taaaatcaaa atcagtaatg  
127081 ctttgataaa tattttgtaa aaaatctaaa ggtaaagttt ttttcacatt taatacattt  
127141 atcaaagcat tatttaacaa atgagcatct cgtaaaatat cttgagcact ttgaaaatcg  
127201 ttttttaaat gtaaaaaaat cttagacaaa aacttaagcg atcgattata ggtaaagggt  
127261 ttgggtatat taagagaagg ttttttctgg gtaaaaaatt tttcacagca ttctttaaaa  
127321 cttatatttt ttgcaaaatt aatataagca ccccttctg tagcattata aaatactgct  
127381 ttatcattat ttcttgcaat aagatattca agctttatgc ggtaatcatt ccaagcaata  
127441 tgagttaaaa cctcaccttt tccttcataa gctagaactt ttagggttgg catatttaga  
127501 gtatgatcaa acttttctcc aaaaacaaaa tcttttgaat gtgaatttcc ttttcatca  
127561 aaggctaaat cttgtcctat cataacgata tttttaaaac ctagagctag agccaaagta  
127621 taagaaaaat gacttacatg ggttcctgta tctatatagc caaatcatc caaatgaaac  
127681 tgttcataca aatattttat tcttaatgca acgcagcaag gtagttttgt ttgcacgtgt

127741 tttacaacat taggatgtgt atttgctgct aaaaccgcta tggtttttaga ataatctaaa  
127801 ggttttgaac aattaaaaaa tttcactgtc aaatctttta tatccaaatt caatacatag  
127861 tctgcaacaa taccctcatt ttcaagcata tttaaagcac catctgcaca aaaaataact  
127921 acattttctt gatattgtct taacaaagaa agttgtttat gaagactagg accagctgaa  
127981 actacaacgg ctgtatcaaa tttggctttg cgttcgctta aaagtctttg aaagggtata  
128041 ttttgtaata aatgggggat attttgcaaa aattgcttgt aacaaatagt tggtagttga  
128101 tcattgggat caaaatttct aataactaaa aaaatattat ctatacactt tttatcagtt  
128161 tttgatatag tatcttgata atacaattta taaaaattac aatttataaa catctcataa  
128221 agatttaacc attcaaatat atctctttga tcaaataata tactaagctg aagctccatt  
128281 tttggctcac aaacatccac aagataaatt ttcccactac aaagctcttc actcaaactt  
128341 agtgcgctta aagctaagat aaaaagttct atctcacttt caaatacaaa aagatgtcta  
128401 taatgcttag ctaagttttt gataagcaag gcattgccta taccatagat acatataaaa  
128461 ggatatctta aagttttttt taaaatgttt tgataaaaaat aatttaattc ttctaagttt  
128521 tcatacatga aaatatcatt gtttttatca tagatattta aatttccatc catactaaaa  
128581 cgagagcaag tcttagtttg tataaaattt aaaagtttat ttccctaaggg ttcattgact  
128641 ccgcttaata aagcttgat gtttttttct aggatactca tggaaatttcc ttaagttttt  
128701 gtgatatcta gattgatttt attgtctttt tcgctaaaat gatatatcaa accatcacia  
128761 gggtagctta tgcttttggt tttccattct tttctagaat tagataaaat tttttcaagc  
128821 atacaaggaa gttctttaga aatcaaagtt tttatagaca ttcccatacc atgatctaag  
128881 tttttgataa atttaccatc aatttgatct ggatttttta tcatatgaag ctcgcatca  
128941 aatcaaat gctttaaata tttataaagt tctaatttct catcgggctg agctatttct  
129001 ttatcataaa aagaatgata gcttgataaa tagggttttg gataatttgc ttgattttct  
129061 atatgatttg gctctagat gtatcttatc attcttcttg gtatagaaaa aaagttattt  
129121 gagcttgaat tacttgtcca aaaagtttta tccgaacaat aaatatggat atgtttaaaa  
129181 aaaatagccg ttccaaaaca atagtatttt gtaaaatcaa tttccttacc aaaacctata  
129241 agacgcaaaa gaaacttagc ataactagaa ttatctatca cgccatctac aagccaaggt  
129301 gcaaatttag ctgctaaatg tgctaaatat cctccatgag aactacctat catgataacg  
129361 ggcatacccc ccccatagt gttaaaaggt gcatgagcct taagataaag agctgcattt  
129421 aataaatctt gcgcttgcat tactccaaaa ttttgatact ctttttagc aggctgcaaa  
129481 cttaaataaa tgcttagttt aaaatttgaa acaatttttc tttgagtttt acgctcttct  
129541 aggattgtgt ctactttttt aagtgtaaaa tttaaatctt ctaaagaatt taacttatct  
129601 ggattgattt ttatgcctaa agtttcacia ctgtttgca aaatcaactt atctatatca  
129661 tctaaataaa aagtagaacc cgtttgggga cgatttccta tacaatgata atttacgcta  
129721 acaacagcta cactaaattc atttgctaca aattcagcta aatgctcagc ataattttca  
129781 tttgcatccc cgccaagtcc agggactata aagaccaaag ctttcatttc tttttcatca  
129841 tcaaaacaaa gtttaaatc aagctttgat tctcttttta taccaagttc tacatcatca  
129901 caagaatcaa tttcataagt tttatttact atcatcaaat ccccctatca aaatataagt  
129961 ttgactcgct aaattcctaa aattctcatt tttacttaag gccacgcaag ctttattttt  
130021 tgagctgctt gtaaagtcta agttttgaaa ttcttgtttt gggttattgg ctatgttgat  
130081 tatggcattt ttacttgctt cattgctaga aattcccac aatacaaaat catttttatc  
130141 aatgaaaatc agctttatac actccttatc ctctcctacc ctaaaattta cttcttttat  
130201 acctgtaaaa tttttaagat caacattttc cactccactt acattgctca taaaattcat  
130261 agtgcttaaa tcactatfff ttaaggcata gatacttata tcgttgatta aagttttaag  
130321 attgtttaag gatttactca cctcagcttc atctctacta gaactgaatt ttggcaaagc  
130381 gattgctgct aaaattccta aaatcacgat acaaaaaaca agttccaata tagtaaaagc  
130441 tcttttctt tttatatcct taaaaaattt ttattttttg gacttaaaat ctctcttca  
130501 agttccacia attcttttct tttataagta tcaacccag ctcttgcaat cattaagca  
130561 ttatcagagc agtattttta aggagctagt ttttaattgc tttgatactt ttcacataaa  
130621 ttttgcaaac gagaacgcaa atttaaattc gcacttgctc ctctacaac accaaaggtt  
130681 ttaaacttgt aaagatataa aatcttttct aatttatcca tgatatgttc acatgctgca  
130741 ttttcaaatc cataagcaat ttctgctttt atatcttcat ctaaattttc atgttttaaa  
130801 atttccaaac gcaccgcat ttttaagccct gaaaaactat aagcaagctc cttggagtgt  
130861 tttaaaggga tattaagtg gatatttttt aatttggctt tttgggctaa attttctata  
130921 agtactccgc caggatagcc caaattcatc atcttagcta cttatcaaa actttcgcca

130981 aagctatcat cgttagttct tgctaaaatt tctatTTTTc catctttccc aagataaaga  
131041 accatggtat gcccgccact tacaagcaaa attcccatat caagacaaat tgactcctct  
131101 aaaaaaagac tataaatatg gcctttaaga tgattgatag ccattaaagg caaattaaga  
131161 ctaagcgcta aagtctttgc catacttatg ccactaagca aagaaacact aagtccaggt  
131221 tcatttgtca cagctatggc acagagttta tcaaaatacc cttgcatg ctcaagtatc  
131281 cttggcaagg cttcactatg aagtcttgct gcaagctcgg gcactactcc gccataaaca  
131341 ttgtgctcca tttcttgaga aatTTTTta tgaaatttac actctaaagt atctttatcc  
131401 atcactgcta tagagctatc atcacaagaa ctttctatgg ctaaataaag atttttcatt  
131461 caaattccac taaaatagaa ccgataaatt tatctttaga tcttgcggtt tttagagtag  
131521 aaagatcaag aatTTtagca tttttgataa gtttgctttc gacactatct tctaaaaatt  
131581 gttgcaatt agcccctctt aattcataaa attctacacg ataaattttt cctgccatat  
131641 ctaaagaata aggcttttgc atatTTTTt tagaaactaa catattgctt tcatctctgc  
131701 catgatcaaa acctatgata tttacacgca cacctttaat cttggcaca ataaaatttt  
131761 ctttaacttg aagttttggt ccaaaattaa ctatagtttc attgccatct acttgtaaag  
131821 ttactttatc aaaagggtg ctaaattcaa gatattcagg ataaagtctt gtttgaaatc  
131881 gggtgccata ttggatataa aaagaattat tttcagctat aactgcagta agctcattgc  
131941 tagtgttata atttaattct ttgttgatag gaaaaggtag ataattgata acttgcttg  
132001 gattttttaa agaaagtaaa attttatcat caaaaagctt gacttcaagc tcttgattga  
132061 tagctttatc aacaccttgt ggggtaagct caaaagtctt agtaaattca attcctgctg  
132121 tttttagata gttttcgatg gctaaaagat ggtaataagc ctttaaattt acaggcaaat  
132181 ttttacttgc ttcattcgca aaagcggctt tgtgattgga tataacaaaa tatgttaaag  
132241 cttttagcat ttcagtatcg ccaagctctt gagttttggt atttttaaga tgataagcat  
132301 gttttggatc ggctaaggaa gcattgacac tatttacagt ttgagtggct ataccttcaa  
132361 gattagggta tttactagca ttgatttcac ttgtatcaat cacgcttgaa tttcccaac  
132421 gcttaggggt ttgcatagca tcaatatatg tgggcttata aaaaccccaa ccatcgtgaa  
132481 gattgatcac catactaact tcaggaagca agataagctc tttaatgcgt tgaactgttt  
132541 gataatcagg atcttttggg cttagacttg cgaatttgcg gtttaaattt ccattatttc  
132601 cacgcgagcg cttgataatg ctatcaaaag ccaagttagg agcaactatg attttacctt  
132661 tagtgatatt ataactactc aaaagcaaac ttgctgcgtg aaatccacca ggctcatcac  
132721 cttgaattcc ccaaaaaatc aaaactgtat tattatcatc taagcttttt ccattttctc  
132781 ctactactaa ttccaaatcc aaagcaaaaa gtccacttat aaaaaaata atcgatataa  
132841 aaaatttcat ttcattcccc ttaaatactc tcttgTTTTa taatcactact caaaaacttc  
132901 atcaatactt gaaattttag gcacgcaaaa atgatccaat gctttaaaaa taacatgagc  
132961 aatatctaaa aattgtattt tattatctaa aaaattttgt acccctattt cattagcagc  
133021 attgataatc acgcctaaat caggattggt taaaagctcg tttttgagtt taaaaatagg  
133081 atatTTTTt gtgctgattt tataaaattt taaactagaa agtttaacaa agtcaacagg  
133141 ctctaaaatt ttactatcat gcttagaaaa aatagcctct gatatggata atttcatatc  
133201 tgctcttgaa aaatacgccg tgcttgccgc atttttaaac tcgcacatag catgaactaa  
133261 agattttggt tcgattaaag catcgatatt tttaaaatca tacaatgat aagcttcgat  
133321 gatttcaaaa agcttatttg ccattgtcgc actatctatc gtgatctttg aacctatatt  
133381 ccaatttggg tgcttttagag catctttaac actcacatgg cttaaatctt taatTTtatg  
133441 cttataaaaa gctccaccgc ttgcagtaat ataaagcttt gctatatctt ttttacctc  
133501 aagcaaaaat ttcaaagccg aatgctcact atctacgggt aaaaacttcg ccccttttag  
133561 aaattttcca gcaactacca agctttcttt attagctaaa gctatTTTTt taccaagctc  
133621 ctttgctttt aaggtgcttt tcaatcctgc aaaaccaca atagcattca gtagcaaatc  
133681 atcttcgcac aaacttaaaa tttcttctaa gccctcttgt cctacaaaaa ctttatcgtg  
133741 ttttactaga tgcttatctt tagagTTTTt aatcgctaca aattcgggtt taaattgttc  
133801 tatttgctca tttaaaagac ttatattttc cccgcaagca agagcagaaa tcttgatatt  
133861 ttttaaagtg gcaagtttta gagcattaag ccctatactt cctgtacttc caaaaactat  
133921 cataaaagag caaccatcac aaaagcagcg ataatcaccg catcaattct atctaaaatt  
133981 ccacatgtc ctggtataag atctccgcta tcttttacgc cgccttctct tttaaaataa  
134041 ctctcaagca aatcaccaat aactgcaaaa aatgctacaa aaaacgagca aagcaagaa  
134101 agccaaaaac tataaacaaa aattcctatc aaggtacca aaatactcgc acaaacaggt  
134161 ccacctatca cgccttctaa ggttttatta ggactggttt gtgaaaaggg agtttttccc

134221 aaaagcttgc ctataaaata ggctgcgcta tcgcaaattg caacaatagc aatcaaccaa  
134281 aacaaagcaa acattccatc atctaaatac acctgccaaa gcgctaatac aggcaagctc  
134341 ggataaagat aaatccaaac agcttttaag ctaggagctt ttttatacac aagataaccc  
134401 aacaccaaaa gtgctgctaa agcaccaaaa gctaaaggaa tttcactaat ggttccaagt  
134461 ataaaggcta aaaccaaagg gataatgctt acatcttcta aattaaataa ttttttggct  
134521 tcattaaaag ctagatacaa tataaacgca aaaacaataa aattgataat aaactgatcg  
134581 attaaagcaa tgagtatcac tgctatagcc atcactacgc cccaaataat tcttgctgca  
134641 ttaaacattt ttttccttat atgctgatat ctatatgatg aatactttgt gcatttttaa  
134701 agcttgcttc ttctgtttgc tcttctaagt tttcatcctt atcatctttt tttgcttctt  
134761 gtttttgttt tttctttttt tcctcttggt cggctttttc tttaatctct tctttgattt  
134821 cttgagtttc attgactttt tcaagcttgt ttaaggcttt ttctttttca ttaaaagctg  
134881 ccatatttaa tgaagctgca aaaccttcct ttgcaagctc attacttgct tgagtagcag  
134941 gataagccat attttgatta acaaaattca tatttcctat tgggctaact ggcattttta  
135001 atcctttgtg atattgatac ttttaaaatt tgtatatttt acaaacgcct tttgctgaac  
135061 cttaacaaaa ttctttaaag tataatcgac ccaatatgaa cttttcttta atcctgaaaa  
135121 attcacgcaa agcctcgcac taaattctat cacttcttcg ctgatttttt gcttgtttga  
135181 aataatcaaa acatgagagc ttggaatata ccttacatgc aaccacaaat catctttttt  
135241 tgcactcttt agcaaatttt cattgccttt ttcattttta cctacacaaa ttttaaacctc  
135301 attaaaataa aaattagcta tgccactatc ttgcttgttt tcttgatttt tcttagtgct  
135361 ttttttaggc aataaaattt caagctcaaa ttcattttta gctttactta gcatttcttt  
135421 taaaccctta gcaaagtcta gtttttcttt taaattttct ctttgtaaatt taaattttct  
135481 agccttttgt tctaattttt tagcattttt ataaaataaa ttagcacttt cttttggact  
135541 taaatcaagt ttaaatttta ctttttttcc ttcaaaatca tcaagttcaa attctctttc  
135601 atattctttt aaaatgctta aattagcaaa taaaatatcc gcttgctttc ttaaatttaa  
135661 agcctgatcc aacaaaagct cttctttatc caaagcaaga taaagctctt ctaaattttc  
135721 tattttttta tcaatttgag cgagtttaag tgtttgaatt tgtttgattt tatttgcatg  
135781 taaaatttca aatttttgag taaaataatc attaaaattt tttatttctt caaatttttc  
135841 atccatttta taaggcttta aagcctctaa aaccacatta ggcttaacaa cgcggtaact  
135901 tttatcaata tgccttaaag cctctataat caaatctttt tcatctgtga taattacatt  
135961 agtattttta cccgtaaatt caaaataaat cttactttca tagctcttat aagccttatc  
136021 aaccctaaca ctaaaacata aaatacgatt gccttgaagc aatttcactt ctttgataaa  
136081 agcattgtta agtattttt ttagcatgaa atcaaaagga gcgttataat ttttactcat  
136141 caattttgca gtataaatag cactcattcc acgagttaaa tcaaaaataa atctttgttt  
136201 atcaaagctt agctctaaaa tattatcatt aacacgcttg ataaaatcga tttttttaa  
136261 ctgggaaaaa aatttttgta attgcataag ttctgtgtat ttcataaaag agattataag  
136321 atatttttga tgaatttatg atagaattga aataaaaaag gaaatttttg aaacttgaaa  
136381 atttaaattg tgtgatttta tgtgggggta aatcaagtcg catgggagag gataaaagca  
136441 aattgatttt taaaaatcaa accttaacc aatttcaagt agaaaaattt tcaaaaatat  
136501 ttaaaaatgt ttatgtgagt gctaaagagg acaaatttgg agcaaaattt aaactcataa  
136561 aagattgtcc tgaatttgaa atttactccc ccatgcttgc gctttattct atactttcaa  
136621 attttaaga tgaatttggt tttattttaa gcgtagatag tcctaacta agcgataaag  
136681 aacttttaa aatgctagcc tttttagagc aagattatca aatcatcatt gccaaaacc  
136741 cctcacacia acatccttta tgcggatttt atcacagctc tgtagcttat ctttgtaaag  
136801 aattattaga aaaaaatgaa caaaaaatcg ctttattggt ttctaaagcg aaaaccact  
136861 ttgtggaatt tgaggatgaa actcctttct taaatcttaa tttttatcaa gaatatgagc  
136921 aatttaaaag cgagtacgag tgaaaaaaat tcttttttg atatttttt atagtttagt  
136981 attttgatg gattttgaac aagctttaga atttgagaaa aaagggcaat atgaaaaagc  
137041 tatgcaaat tataaaaaac tagccttgca gaattcttct aaacaagaat tccaagaaaa  
137101 taatgcttct ttaaattcaa acacaaagca cgaaatgcaa gctaccaaa aagcagctag  
137161 cacaaaagag gatttttcgc gtatcgcttt ggaaaattat ttaggagagg attcaagctt  
137221 taatccccctt ggaatcagct catataagat gaattatttt ctaccctttg cttatagctt  
137281 tggctcatta ggcggggaaa atagaaaaac tgaaatgaaa tttcaactca gtattaaaa  
137341 aagattgttt gaagatttgt taggattggg tgaaaaatat tatgtaggct atactcaaac  
137401 atcttggtgg caaaattata aacattcctc accctttaga gaaacaaatt atcagcctga

137461 attttttgta gatattcctt tgcattttga agagtataaa tttcttaaca atctaagagt  
137521 ggggaattttg catgagagca atggcaaagg agatgagaat ttagaatcac gctcttggaa  
137581 tagaatttat gcttcaagcg tttttttata tcagcgtttt ttatttgttc ctagaatttg  
137641 gtatagaatt cctgaaaaca gcgaagatga tgataatcct gaaatcacac attatatggg  
137701 aaattttgat atcaatatgg gatatttagg aaatgattat tttatcaatc ttatgctaag  
137761 aaataatcct gattttcatg ataataaagc tgcggtgcaa gtagatatag gatatgatat  
137821 ttttgataat ggaatttatt ggtatttaca atacctcaat ggctatggag agagcctcat  
137881 agactacaac aagcgcttac aaagactttc tacgggattt ttaatttcat attaaattta  
137941 attttctttt ttataaatta aattaaaaca attgattgag attttacaaa tttttatagt  
138001 tttttaaatt attttatttt aaaatacgat tttatttttg ataattatta ttactataag  
138061 gaaaaaattg ctttttaaac acttgtttag tttaaatatt cttttaatct tacttgtcat  
138121 ttttggataa ttaagcttat ttataggggt tattcgtatc aatttagacg atattttttc  
138181 actcagcgt acccagcttg aaatcatttt gcttacaaga attccacgac ttatcgcaat  
138241 tttactcaca ggtatgagtc ttagtatatg tgggctcatc atgcaacaac tcacacaaaa  
138301 taaatttggt tccccacaa ctgcaggac tatggattgt gctaaatttg gtatattgat  
138361 ttctttaata ttttttgcag gagcctcttt ttttaccba gccctcatcg catctatttt  
138421 cgcactttta ggctctttta tttttatcca aattttaaga aaaatcaaac tcaagatgt  
138481 gattttcgtg cttttgatag gcttaatggt tggcgggatt ataaatgcta taaccacttt  
138541 ttttgcctat gctttaaatt atatacaaaa tatccaaggt tggctacaag gcagcatggc  
138601 aaatgttatg cagggaaatt atgaattgct ttatatcttct ttaccgcttt ttatacttgc  
138661 ttattttcta gctcataaaa tcactatagc aggtatggga gaagatcttg ctttaaatct  
138721 tggggtttct tataatacaa tcttattttt aggtttaata atagtttcta ttatcactag  
138781 tgtggtgatt gtaagtgttg gagttatacc ttttttaggt cttattatcc ctaatcttgt  
138841 tgctatttat cgcggggata atcttaagaa aaatctcatc tatatagcat tatgtggggc  
138901 tttgtttttg cttatttgcg atattatctc aaggcttgtg atttttcctt ttgaaatgcc  
138961 attaagcata actgcgggtg ttttaggac tttgatcttt atttttcttt tactcaaaag  
139021 gaaaacttat gcgtaaaaaa atcttaaatct tgagttttat aactcttata atggcacttg  
139081 tttttatatt tgcgggttta aaagattttg atgaatacgc attaaaaaat cgctctttgc  
139141 aaatcgcagc tattgttata gtggctattt gtatagctgt atcaactata atttttcaaa  
139201 ctctttgcaa taacaaaatt ttaaccctg ctatcatagg cttagattct ttatatatgc  
139261 ttcttcaaag cgcccttgtc ttttctttgg gttctgcaa tttgagcgta tataaaaaatg  
139321 atattaatth tttaatcact cttagcttga tggttgtatt ttctttaggg ctttataaaa  
139381 ttcttttttag tagcgacaaa agcatttatc ttatcatgct tttaggcttg atttttggaa  
139441 cgcttttttag caccttaagc tctttttttg aaattcttat cgatcctgat gaatttatgg  
139501 ttatccaagg aagaatgttt gcaagctttg ataatgtagc ctttgatggt tttagctcttg  
139561 cttatatcgt tactttactt agttttgttt ggatttttcg ttatatgaaa ttcttagatc  
139621 ctttaagcct aggcaaggat ttatctatca atctagggat aaactatcaa aaaatttcaa  
139681 aacaccttat gataataatt gctattttta cctctattag cacagcgtt gtgggccccta  
139741 tcaccttttt aggactttta gtagtaaaaa tcacttacga acttttcaaa acctctaaac  
139801 atagtattht actacttgc tgcgtgctca ttagcatttt agccttgcct gggggagtgt  
139861 tttttgtctc tagggttttt gattacaata caactataag cgttattatc aattttctag  
139921 gtggaatata ttttatctat cttgtattaa agggcaataa attatgataa gattacaaaa  
139981 tatcactaaa tgctacgata aaaaagctat tatttcagat cttagcatcg attttcacaa  
140041 aggaaaaatc acttctatta taggagcaaa tggagcagga aaatctactc ttttagccct  
140101 tgcaagccgt ttaatcaaac ctgatagcgg gcgaatctat atcgatggta tggatttaac  
140161 actatataaa gaacaagatc ttgcgcaaaa aatttccatt cttaaacaac aaaaccatat  
140221 caatttaaga ttaaaagtgt aagaattagt cgcatttggga cgctttccac actctcaagg  
140281 aaggctcaat gcaaacgata aaataaaaaat cgatgaagcg cttgagtata tgggacttaa  
140341 ttctctaaga aatgaatttt tagacagctt aagcgggggg caaaaacaaa gagcttttat  
140401 agcgatgatt atcgctcaag ataactgaatt tatcatgttt gatgaacctc ttaacaatct  
140461 tgatatgaaa cacagtgtgc aaatcatgca acttatgaaa aatttagtaa aagactttta  
140521 taaaagcata gctgttgtgc ttcacgatat caattttgct tcgatttatt cagatgaaat  
140581 tatagcccta aaaaatggaa aactttttaa acaggggtta aaagatgaaa ttatccacga  
140641 agatgtttta agacaaatth atgatatgga tatccctgta agtcagattg atgggaaaaa

140701 aatttgtatt tatttctaaa taaaggagaa tatatgaaaa aatcttttagt ttttgcattt  
140761 tttgcatttt ttttaagtct aattttaacg gcttgcgatt caaaatctaa tgaaaataac  
140821 gcaagcgccg caacaaaaac tagcactacg gtaaaagtta tacctattag catgagtgat  
140881 gagggcgata gctttttggg aaaagatagt ctaggtgaaa acaaaattcc taaaaatcca  
140941 tctaaggttg tgattttaga tcttggaaatt ttagatactt ttcattgctct aagacttaac  
141001 gataaggttg caggagttcc agctaaaaac ttgccaaaat acttacaaca attttaaagat  
141061 aaacctagcg taggtggggg tcagcaagtt gattttgaag ctattaacgc tttaaaacct  
141121 gatcttatta tcatttctgg acgccaaaagc aaattctatg aaaaattaaa agaaatcgct  
141181 ccaactatgt ttgtagggct tgacaatgcg aatttcttaa gctcttttga aaataatggt  
141241 ttaagcgttg caaaacttta tggcttagaa aaagaagctt ctgaaaaaat tgcagatatt  
141301 aaaaatgaga tagaacaagc aaaaagcatg gtagatgaag acaaaagagc tcttattggt  
141361 ctaacaaatt ctaacaaaat ttctgctttt ggacctcaat ctcgctttgg aatcattcac  
141421 gatgttttag gtatcaatgc tgtggatgaa aatgtaaaag tgggtacaca tggaaaaagc  
141481 attaattctg aatttatact agaaaaaaat cctgattatc tttttgtagt cgatagaat  
141541 atcatcgtag gcaacaaaga acgcgacaa ggtatacttg ataatgcact tgtagctaaa  
141601 actaacgctg ctacaaataa taaaatcatt tatcttgatc ctgaatactg gtatctagca  
141661 agtggcaatg gattagaatc actaaaaacc atgattttag aagtaacaaa cgccattaaa  
141721 taaactatth gtaagaggat aaacttctct tacaccctaa ctaaatacaa ccaacaataa  
141781 caaatattaa aataaattta agtttatatc tactataaaa aattcacttt cgcttcacat  
141841 tcttttgtca aaataccata caaattgata atcaaaaagg agagaaaatg attaacaaaa  
141901 acaaattatt tagacaaatt cacatttatg tgagtttatt tttcttacc tgtgctgtac  
141961 tttttgcact tacagggatt gtttatatct ttggagccga tcaagataca ggcttaaagg  
142021 tagaaaatta taaacttgta aaaaatatag aagttggtaa agaaaaagat gcactcatcc  
142081 aatacctaca agaaaacaat ttaaaaattc catctaatac tgaagttatt gaaagcaaag  
142141 ataaggggat aaccataggg ggagcacatt atagtgcaaa tatagctctt gttgctcaaa  
142201 acgagtatgc aataactctt aaaactagat ctttactagg cgatatgatc atgcttcata  
142261 aagataaagg tgcttggtat ttttctgtgc ttagcatagg ttttggtatt gctttattht  
142321 tgctctatat ttcaggctctt ataattactt tttttgctag caaaaaagat agacaaaaac  
142381 agctcgcaac gcttggagct ggggttggtta tcactatatt ttttagcttat cttagctctt  
142441 aattttttta tctagctttt ttaagctagg tattatctaa ttttttatat aatcacactt  
142501 taattttattg gacagatggg tgagcggctg aaaccacacc cctgctaagg gtgcagatct  
142561 taatcgggtc tcgagggttc aaatccctct ctgtccgcca ctgactttca aaaatttata  
142621 atcccatgat ttaaacacag tttcaaatca atgatcttaa ttttttaagc gatattttta  
142681 atctttaata ttactttaca taaaaatata caaaaaatta aattttatcc ctactttaat  
142741 cagttaaaca atatagcatt ttaaaattat aaaaactctt tttttgagcg tatttaattt  
142801 tatattttac aagattaagc tttttattt tgattttaaa atgctaaaaa atacattaaa  
142861 aatataagct taaattatct attttacata ctcttatctt ttttataaag cttatacatg  
142921 ataatgcttt ataactctaa gccaaattgt agattaaaat tttactttta taaatctgc  
142981 atcacttaaa cacagcgcac aaaaaaatat aaaaataaaa aatatagaat ttatttgaag  
143041 gatataaaaa gccctaaaat atagggcttt taagaattat tttttatcaa taacttgata  
143101 attatacgga gcaaggtttt tatcgtgttc taaaagttct tttggaggat tgccatttac  
143161 ttctatttca tcaccataat aacgctccc tgctttatgt ccattaacat ctactttata  
143221 ataaagctct ccaggattga atttttgtat atcttcaaaa cctaaatttg aagttttaaa  
143281 atcattaatg ccattagcat tagcaatttc tataagctta atttgtcctg ttttagccat  
143341 atctacagct tgtaaaagca ttcttgaagc ctcacgagga ttgtggaac ctgttgaatt  
143401 ttcagcatta acaaaatcag ctctcatttg agatttgcgg tgaagctcta aaacttctt  
143461 aagttcttca ctgatcttgc ttgcatcagc tttaccatcg gtttggaaatt tctccatatt  
143521 tcctagctca tcgctgaatt ttttagtatc catgattaag ctaacgatag catattcagc  
143581 tgttctttga tcgtgtgcta cgctattht tatatcacga acttgagctc ttaataatc  
143641 ctcgctttgt ttatggcaag ttttacaagc agaattaata tctcttaatg gagaagtgat  
143701 attgtgttga gaaattttct tagcaccttc tctaataaa ggcatatgac aatcagcaca  
143761 acttactcca ttagcagcat gtacaccacc actataaagc tcactttcag ggtgttgaat  
143821 tttaatgatt ggagcacctg ttaatttatg agtgaaatct gcacaaata cattgcgaac  
143881 tttttcataa taatcatcta gcatttcaat tctaaaaggc tgacctttt tccattcact

143941 ccatgggaat gttagcatga taccattagc ttcaatttct tttggcttgt tgccatctct  
144001 ccaaaattca tattcatcat aattcttttg agtaccatcc caccattttt tagaactatc  
144061 atcaacaatg gtttcacca ttacttttac tttttctcct gttggtttaa aataatactc  
144121 aacatggcat tgtgaacaaa ctaaagttct catctcttct cttgtagctt ttacaccttg  
144181 tactggatct ttttcatagc ctctagcaac taaagcatta attgcagcag gacgagtaag  
144241 tcttaaactc atatcatttg ggttatgaca atctgcacaa gtaacacca ttcttttacc  
144301 accatgcggt cctgcatgct ctggagaatt ttctactata ccatcaacag ctggaacatt  
144361 tttaatcata gtccaataat ttgtagagtt aaatgcgaca aaatctcct ttgcaatatt  
144421 attaataagc catggagtcc atccactatg acaattcata caagctgctg gctgaccctt  
144481 aaatgcttta agtccgtgag cattaagaaa atctttatta tttcttgagg ttttcatttg  
144541 atctacttga acccaaaaat gccctctttc ttcgttaaaa tcaagactga aaggatatcc  
144601 ggcccaaagt atagttaatt gaggaaaacg aataagtttt gaataagata aattaccccc  
144661 aaattcagta gccttagggt cttcttcttc aactgttaaa tacattttta gttgttctgg  
144721 aaaaactttc ccccatcttt caaaatttgg attatcatcg ctaagtaaag aaaaatccgc  
144781 atttgcagca atggcatttt tatttgcctc gtcttctttt ttttgattta tatcattatt  
144841 gagccataaa actcccacta taagcaaaac taaaacaacg atagctaagc gtaaaaaatt  
144901 ttttttcatt caatttctcc ttaattaaat tccatgtttg tgaccacat cttgatgaca  
144961 agaagcacat tttaaagatt tgtctgcgtg tggatttgtt gtagcattga tggctgtttg  
145021 agcaaatca gcatgacagc gaacacaatt atcttgtatc atttttctgc ttttctcagt  
145081 cgcgctcaaa tttgtaggaa gctcatcgag tttaaaagta aaagcataag catgatttaa  
145141 accactctct gctttagcta tccacttagc caaaaaacca tggggcaagt gacaatcaac  
145201 acaagttgcc cttagcctctc cttttacctt ttgtgcatgc ggtcctgcca tatattcatt  
145261 ataaacctca ttcataatat ggcaattatt acaagattca cttgcattac ttaagtaaga  
145321 tgtacctttt gcattataaa aggtgtaaaa tcctaccgca aagaacacaa aaagcaaac  
145381 aagaaaaata ccaaaaagat tcaaagattt tttcaaaatt ttcctcctta aactttcaga  
145441 ataaatgaaa ttgtgatttt aacatatagc tttttaagat aaatttaaag atatatttac  
145501 tcttaattaa ccagaataaa aattttgaat tttatttcta taaaaactc attattttca  
145561 aaaataaatg ttaaaataac accaaaaaaa ggagttttta tgcaaacaaa tccgaatatg  
145621 tttttaaata gagaactttc ttggctacgc ttttaactcac gggtactaga tcaatgttcg  
145681 cgtccattgc ctttattaga acgccttaaa tttgtagcta tatattgtac taatttggat  
145741 gaattttata tgatacgcgt tgcaggatta aaacaacttt tctcagctgg agttaatata  
145801 agcagcagtg atgagatgtc tcctttacaa caattaaaag ctatacгаа atactttcac  
145861 aaagaaaaag atctgttaga gcattatttt aatgaaatta taagtgatct tgaaaaagaa  
145921 aatcttttta ttaaaagcta tgaaaatcta gacaacaacc taaaacaaaa atgtgatgaa  
145981 ttttttttct ctactatctt tcctgttatc gttccaatcg ctgtagatgc aactcatcct  
146041 tttccgcatt taacaatct ttcattttct ttagcggtta aaatttgcga taaaaccat  
146101 cctgagctta tcaaatttgg aatgattcga attccaagag ttttacctcg tttttatgaa  
146161 gtgagtgcaa atgtttatgt tccaattgaa agcatagtgg aaaaacacac agaagaaatt  
146221 tttcctggct ataaactcct tgcttcagct gcttttagag taactagaaa tgcggatatg  
146281 gtgatagaag aggaagaagc tgatgatttt atgatgatac tagagcaagg cttaaaactt  
146341 cgtagaaagg gtgcttttgt aagattgcaa attcaaaagg gcgcagatga acaaatcgta  
146401 gaatttctta atacccatat gaaaattttc cacaaggatg tttatgagta ttctatctta  
146461 ctaaactctc cttagcctttg gcaaattgct ggcaataaaa cttttactca tcttttaagc  
146521 ccgctttatg cacccaaaac cttgccacct tttgatgaaa atttatccat ctttgatgag  
146581 atagataaag aagatatact catcattcaa cttttgaaa gctttgatcc tgtttataaa  
146641 ttcatcaaag aagcaagcaa ggatcctgaa gttatttcca taagaatgac tctttataga  
146701 gtagagaaaa actctaatat agtccaagct ttaatcgacg cagcgagcga tgggatacaa  
146761 gttacagtta tggtagaact taaagcccgc tttgatgagg aaaacaatct tcaactgggca  
146821 aaagctttag aaaatgctgg agctcatgtg atttatggaa tcaactggctt taaagttcat  
146881 gccaaagttt ctcaagttat acgcaaaaaa ggcgataagc ttaaatttta tatgcattta  
146941 agcacgggaa attataatgc aagcagtgtc aaaatctaca ccgatgtaag ttattttacg  
147001 agcaaagttg aatttgcaag ggatacaaca agcttttttc acatactttc aggatttagt  
147061 aaaaatcgtc gccttcaaac cctctctatg agtccaaatc aaatcaagga aaaaattcta  
147121 gaaatgatag ctttagaggc aagtaagggg agcgaaggag ttatcattgc aaaaatgaa

147181 tctctttag atagcgatat cataaaagct ctttatggag cttagcataaa aggaactcaa  
147241 atcgatctta tcgttcgtgg aatttgctgt ttgaaaccta atgaagaatt cagcaaaaac  
147301 atacgcgta gaagtattat aggaaaatat ttagaacatg cttagagtgtt ttattttaaa  
147361 cacagcgagc caaattatntt tatatcaagt gcggattgga tgccaagaaa ttttagagcgt  
147421 cgtttagaac ttatgactcc tatatatgat gaaagaagca aggcaaaatt agcacaattc  
147481 ttacgcttgc aactcagcga taatttactt gcttacgagc ttcaaaatga tggagaatat  
147541 acaaaagtgg ctagcaatga aaaagtgatt gactcacaac aaattttaga agaatatgtc  
147601 agtaaaatct ataaaactct taaaaaagat gctgatcaaa gtcgcaaac ttatctagcc  
147661 tctaagcttt ttaaagaaaa ctgataaaat ggtggaagcg aggggaattg aaccctgtc  
147721 caaaaataac cccacaaaga cttctacatg tttagcaaag gtgaaaactt catctagcta  
147781 aaccacactt ccaaaatttc aggctagact aagactttaa cttcgattaa aagtagtagg  
147841 aatataaagt ccgtgtttca tatattgaaa atcacctgct attaaaacat cgcccagacc  
147901 atatttagga ctttaaatc tatgcatgtg aaaatttacc gtcccaaat ctgtctcaag  
147961 acttactact tgacctacta attttgttc attacctaaa attctttagt caaatttatt  
148021 aatagctcct tttagatctg ctctaaaaa tacatctta ggcgtaactc ctgcattcca  
148081 aatattttgt aagatttgat tgagtttatc ttctgtaagt tcagttgcag ttccgctcca  
148141 gtctcccgct tcatcaaaag ctagtacatt tccacgcttt ccatctgcaa atctactatt  
148201 ccctttggct acatagttaa aatccctgc catttctcca cttgttgctt cttgtgcttg  
148261 aatataatct ttaaaaaccg atttttttac atcattatct ctgcccacac caaataaagc  
148321 atattccata tccattttat gctctttggg ttttttgccg atttgatatt ccatctcatt  
148381 gccgccatac tgattggcctt tttagtaaggc ttttgacacc ataacttctg tgataaaaat  
148441 ttgagtagca ttggtggttt tttgagcagt gttttttgtt tcccctacaa attggctcaa  
148501 ttctaaattt gcgttctttt ttggttcttc aaaagtgtct gtaagccaac tatgggttaa  
148561 aggatttgta acttttgaag tgcctatttt atttaaaatt ggtgtttcag tagctccaat  
148621 ttttaataatc gtttcatata ctgattgttt taatttaaca ttttccgttg cgggtgctgt  
148681 atgtcccatt gaaggtaaag ccatttttga attctcctta gtttattttt aaggattttt  
148741 ccaaaaatgg ctatttcaaa aatagtgtgt tttgaaatga ttttaataaa aaaatttatt  
148801 tatatgacgt ttaaaataga gcatatcatc aactattgta aattttttta gaaaagagta  
148861 aacatctctc tttatagata tatcaaagct ttcacagagg ttttccatat ttaattttgt  
148921 ttcattgcta tgttttctat ttgcttcttg tagctcataa taaacccatg gagaatatat  
148981 ggtattgtta ttgcaatgtt ctttgctatt aataaatata aaatacctag cagattctat  
149041 aatatttctt agcgaggatt gtaacatgat atgtaaatga gcaagtaaat attcttcatt  
149101 atcggcttta agttcttctt taatatagct taatattttc ctataattac ccaaacata  
149161 agaacttaca aaagcattaa ctttgcattc ttcctccaaa aatttcttaa gttgtattgc  
149221 cttgtctttt tcttgactaa aatgtgatat aaaaacatca tttttttttt ctgttccaaa  
149281 aaaatattct ttagtattat cgccatcaat agtgttatta tcgctaaata tttttattgc  
149341 tccatagtta taattatttg aactttcgcg gtcgtgttta tctaaaaatc gatcgtattc  
149401 agattctgta atgttttagtt catcaatcaa aaaacattgc atattttact cttattttta  
149461 atgcctgatt atattataat actaattaat attaaagtaa atataaaaaa tattacaagg  
149521 atagatttat ggaaaaagaa aaaatactta ttgaagagct aaaaatgata caagatatca  
149581 ttaaaagaat ggctgataat tcttttaagc ttaaaaaatg gtgcttaacg gtagtagtag  
149641 ttactatgct ttttcaagaa ggggttaata attttatacc tataatctca ctttttggtt  
149701 tttggtttct agattcatat tttttatata tagagagaga atttagaac ttgtataata  
149761 caaaagcaag acaatttaac aataatgcca atttgaaaca atctatgcag agtcatttta  
149821 tttttgagat tgatggaaag tttacattga aaaaattatt tattgttggga ttttctaaga  
149881 ctatattata tttttatgga gtgattttta ttttgatatt acttgtttaag tataaaaaaa  
149941 atgtttttta ttttgttgat aatttaatca tttccattgg tgctattaac acttaagtg  
150001 tcagcattaa acatagtttc agtgcgtatc agctgagcta ggggcgataa tattaataaa  
150061 aattaatcac ctacctttta tcatgcttaa ttaaaatatt acatggattt atgctgcaat  
150121 taataaaata gttaaaaggg agacaatcat cccttttttg taaaatcacc agcgtatgct  
150181 gtcttagtga ttttctattt cttttcaaaa gcagttacta tccactgatt tccccattt  
150241 ttattaaatc ctttattaag ccctaaaata taatctttga aaactatatt gaaagatttt  
150301 tctctatttt ttcgttgtgc tatctctccc ttctcaataa tctcaggtat tatatttaaa  
150361 tccaattcag gatgctcatc gataaatgaa gataaacat aacctttatg ttttacctta



150421 tctattactt ctccccaac caaatcaata tctcctaaat ctttcctatg aaaggcacct  
150481 gctacctgtc cttgtttttc aataagtaat ttttgtaaag caccttttcc atcatgataa  
150541 tactctgtat aattttcacc aaattctttt aaaggctgta tattaattc ttgttcgatt  
150601 ttacctctta aagcacttgg aatatctttt tttatccctt tatcggtgct ttctttagca  
150661 ttgattatca tctgtctagt taggttgat tcaacagtat ttaaattcat cttatctaga  
150721 aaatcaagct tgttattttt attttctttt agaaaatcat catatctttt tagaatatct  
150781 tcactagctt ttttatcatc ttgtattttt tcatcaagtt tttgctttat actttttgca  
150841 ttttaaattg gccttgttca ttaaaaagta tcttctttga tcaaactttt aacttttagaa  
150901 cttttctaac ttcaactccc tgttttattt tatctattaa attgatttta aattttgctt  
150961 gaatggaatt ttaaagaata atatttgctc tatctttgaa gatatactaac tataagactt  
151021 tatttgatgc tatttgattt atttgcgaaat tggatttttc tatacctaataa aaattatgat  
151081 tttttatcct tataaaagta gtttatatca tttttaatct ttatttatat taaatcactt  
151141 tttttgattt ttatttcata tttcaattta aaccattggt acttatttgt aaaataggaa  
151201 atttaataata ttaaaatcac caccaattga tatcttatag ccatttatgt cttcgccaaa  
151261 aattaaataa tatcaaaaaa attaaaaagc aatgtaatgg tggagcgag ggaattgaa  
151321 cccctgtcca aaaataaacc cacaaagact tctacatggt tagcaaaggt gaaaacttca  
151381 tctagctaaa ctcaccttc aaaatttcag gctagactaa gactttaact tcgattaaaa  
151441 gttgtcaatt ttcaatctac actatcaaag atgacaaaaa ttcaagctag atagtatcac  
151501 ttgagtttcg ggctcaactg aacttacgca gctttagcgt aagcaggagc aaatttaacg  
151561 ttatttgcgt ttaattttaa tttggacttt ttacgctttg tccaaagcga catgccatct  
151621 aagcagactt actcctgtcg aagccaagtc gctcccttat ttagaaataa tatttggaaac  
151681 attaacaatt aaaggattaa aaacggctaa aacagaatca tcattttcat acgaacggca  
151741 atatttttca aactgatcgc tcatcaaaaag catccagtct gtaaattcat cgctagctgg  
151801 cccattaaaa cgatttgctt gagccatcat ctcttcaaa aatacacaaa aatcagttac  
151861 ttcttcaaga tttaaacgcc ttgctgcca agcagtatta tgcgcaaaag tttcgagttc  
151921 ttttatagct tctttataac gcacgctatc gcttccaagc tgtatgatta aaggttcaaa  
151981 tctatcgcac attgttctaa aaaattgtaa aaatttttct atgtcgtcga tttcgtaatc  
152041 taattctaata tttgttaaaa ttcccatttt taaaccgtat tgctaaagtt taatgcaaat  
152101 tgtagcaaat tttagctaaa atcttatttt aattttccaa agtgtaagaa tgaaaatag  
152161 gacagaatag tagaaataga aaaatattct tttgatgaaa cttatgaaac ttctttgcgt  
152221 ctttcaaat tcgatggcta catagggcaa gaaaatatta aaaagaattt aaatgtttt  
152281 attagcgtcg caaaaaaag aatgaatgt ttagatcata tactttttag tgggcctgcg  
152341 ggacttggca aaaccacatt ggctaataat atttcttatg aaatgggtgc aaatatcaaa  
152401 acaaccgccg cacctatgat agaaaaagc ggagatttgg ctgcaatttt aaccaattta  
152461 agcgaaggag atgtgctttt tatcgatgaa attcacgct taagccctgc tattgaagaa  
152521 gtactttacc ctgcaatgga agattatagg ctagatatca tcatcggtag tggccctgcg  
152581 gcacaaacta taaaaatcga tttgcctaaa tttacactta ttggtgctac aacgcgtgca  
152641 ggaatgctta gtaatccttt aagagatcgt tttggaatgc aatttagact tgaattttat  
152701 aaagatgaag agcttgctat catacttcaa aaagctgcac taaagctcaa taaaacctgc  
152761 gaaaatgaag ctgctgctga aattgctaaa agaagctgct ctaccctag aatcgactt  
152821 agacttttaa aaagagttag ggattttgca gatgttaatg acgaagaaac gatcaccaaa  
152881 gaaagagcca aagaagctct aaattcctta ggtgtaaag agcttggtt tgatgcaatg  
152941 gatttaaggt atttagaact tctaacagaa gctaaaagaa aacctatagg gctttctagc  
153001 atagcagcag ctttgagcga agatgaaaat actattgaag atgtaataga gccttatttg  
153061 cttgcaaatg gctacataga acgactgcc aaaggtcgt tagcaagcac aaaaagcttt  
153121 agcgtgctca aacttaatta tgaacaaact ttatttgatg aaaattgaag gaaaaaatg  
153181 caaactggaa aaatttttct catctgtttt acttttagtag ttttatctct tttgctttat  
153241 ctttttaaag atttcttact cgtcattatt atcgcaagct tgatggcagt tgctacctca  
153301 aatgcaaacg ctaaattctt aagtctgaca aatggacgca aatttttagc atctatgcta  
153361 acaactgcat gtatggtttt gcttttcttc gctccctttg tctatgcaat gatcgacta  
153421 gctaaggctt taaaaaactt tgatatcaat ctgctcacac aaacgctcaa ttatgttaaa  
153481 aattatcaat ttaccctacc tgaaagtctt agcttttttag aacctaaaat aaaagaattt  
153541 ctacttcta tagacttaaa tagtatctct aagcaaattt taaattatgc ttcaagtttt  
153601 acaaaatcag gagctaaatt tcttatagat atggtgctaa tctgtatatt ttattttttt

153661 gccaatctat atggaacaga actggtaatc tatataaaat ctgtcattcc tattgacaaa  
153721 caagagcttg atgatatttt aagcgaagtg ggtaatgtta tggctgtggt gctttattct  
153781 atgatcatta tcgccatact tcaaggagca ctttttagta tcattgctat gttttacgga  
153841 tacgatgcta tcttaatggg tgtaattttt gccgtaagct ctctcatacc agctctaggt  
153901 ggagctttgg tatatatccc tataagtctt tatgaatttg cttcaagtgg tcttggttca  
153961 gcacttggtta tttttattta ttctgttggt gttatctctt ttatcgctga tactctagtt  
154021 aaacctttaa tcattaatg gattaatgaa aaactcgtaa aaacaccgac taaaatcaat  
154081 gagcttttga ttttcttagc gatgatagct ggaatttcaa cttttggttt ttggggattt  
154141 attttagggc ctgcaatttt aactttttt atttcaacaa taagacttta tataatttta  
154201 aaagataaga atttaattta aaataaaaaa tgtttctctc acacaagaga gaaacatcaa  
154261 gctagactta agcttttggg cctatcattt tagcaggatc aacaaattta gcaaagtctt  
154321 cttcactaac caaacctaac tccatagcac tttctttcaa agaaatacct tttttatgtg  
154381 ctttttagc taccttagca gcattttcgt atccaatag tggatttaat gcagtaacta  
154441 acattaaaga attatgtaga ttgtattcta tttttcacg atttggttct atgcctacag  
154501 cacaatgaat attgaatgaa tgcatagaat cagcaagcaa atcaagactt tgtaagaagt  
154561 tatagataat cacgggctta aatacattga gctcgaatt tccttgactt gcagcaaaac  
154621 ctatagcagc atcatttccc ataacttgaa ccgctaccat agtaatagct tcacattgtg  
154681 taggattaac cttacctggc atgatggagc ttcttggttc attttcaggg atattaagct  
154741 caccaagtcc gcatctaggg cctgaagcta accatctgat atcatttgct attttcatta  
154801 aatttgcggc caagcccttc atcgctccat gggtaaaatt gatagcgtca tggcttggtta  
154861 aagcgtggaa tttgtttggg cttgaaacaa attttgtacc tataagcttg ctaagctcct  
154921 cactcacttt ttcgctaagc tctggatgtg cattcagtcc tgttcctacc gctgttccgc  
154981 ctattgcaa ttctcttaa gttggtaaag aagtgataat ttgctctttt gaggtaaaaa  
155041 gcatagaaa atagccactg aattcctgtg ctaaagtaag cgggtgtagc tcttgtaaat  
155101 gtgtgctcc tattttgata attccttcaa atctttttac ctttttttca aaagtagcga  
155161 taagttcatc aagcgcagga ataagctttt tctctacttg ctctactgca actatactca  
155221 tagcagttgg gaaagtatcg ttagaacttt gagacatatt tacatgatcg tttggatgta  
155281 caagttttt tttacgaaaa tctccacca taatttcagt tgcacgattt gcaatcactt  
155341 cattcatatt catattgctt tgtgtacctg atcctgtttg ccaaattgcg agtgggaagt  
155401 tatcatcaaa tttacctgcg ataatttcat cgcaagcttg aactatagca ctttttttag  
155461 catcatctag cttgccaagc ttgttattta ccaaagccaa agatttttta agatttgcaa  
155521 aagcatagat tagcaccttt ggcatctttt cgcaaccaat tttgaaattt tcaaaacttc  
155581 tctctgtttg agcaccccaa tatttgtcat ttggaacttt aatttcgccc atagtatcat  
155641 gttctattct gtattccatt aggtttcctt tctagaaaat tgttatgcaa ttatttaaac  
155701 aaaaataagc ataaaattag cttataattt aaaatttatt tattttttta gaatttatga  
155761 gagtttatgt gcagttttat aactgcacgg ggtttattca acggttacac ttttggctaa  
155821 atttcttggc atatctacat cattgccaag tcttatagaa atttccattg ctagaagttg  
155881 agtgattacc atcatttcaa aaaattcaca catataatga tcttgctcat tggtttttat  
155941 aaaatcatcg cttaaatcaa aatccaaagg agaaacacaa agaacagtag aatctctagc  
156001 tatcaactct tcaacatttg atttggtttt ttcataaagc agggtttttag gcattaaagc  
156061 tatggtataa agtttagaat cagccaaagc tataggtccg tgcttcattt ctctgcagg  
156121 ataaccctca gcatgcaaat aagaaagttc ttttaatttt aaagctcctt ctaaagccaa  
156181 aggatagaaa acatctctac ctataaagaa aaatccatgg ccatctaaat aacgcttaga  
156241 taaacgatga attttttcat gcaatttagt acttactgca acacaattag gagggtgcaa  
156301 aagagctttg atttcggcac tcatatcgat tttttcttt tgagcaataa aaattgcaa  
156361 catccaaagt gttaaaacct gagttgcaa agccttggtt gaagctacac ctttttcaat  
156421 gcctgcacgc gttaaaaggc ttaaatgtgc caaacggact atattagaat tatccacatt  
156481 gcagatggca aatgttttag ctcttgctc ttttgcaatt tttaaagctt ctaaagtatc  
156541 tgcagtttcc ccgctttgag aaattacgat aaataaagaa ttaggcttta caatcgcttc  
156601 tcggtagcga aattcactag caatttctac cttagcttta accttagcta aacgctcaaa  
156661 caaatacgcg cttgcatag cagcatgata gctagttcca caagcacaaa gcgtgatttc  
156721 atcaactgta ctcaaattct cttttcaag ctcatcaaaa accacttcat cgccattaat  
156781 gcgtcccatc aaaacctcgc tcattacgcg gctttgttca taaatttctt tttcataaa  
156841 aaatcgaaag ccatcttttt ttgcataagc tttatcgctt gaaagcttgg taaaggaatt

156901 ttgtttttagt tgattgtttt cataaataac aagttcattt tccactagcat aacccaaact  
156961 taaatcctca agataaatca cctcatcaca aagtcctatc aagggtgtat cagcgcttgc  
157021 aaaataaaat tcacgatttt tagatttttc tacgattaaa ggagcggcat ttttagcaaa  
157081 aaatacacga gtaggatcct ttttactcac taaaagtgtg gcaaaagcac ctctaagctc  
157141 ttctatcggt tttttccaag cttcaaaaac ttccattttt tctgcataaa attcaaaaag  
157201 ttgaactata acttctgtat ctgtttgact tagaaaactc actccttgac tttcaagcct  
157261 atttttaatc tctttataat tttctataat accattatga atcacacaag aatactgacc  
157321 taaatgagga tgagcattga tttcagtagg ttttccatgg gtcgcccagc gtgtatgccc  
157381 tatagcaaaa ccaaattcct cacttgtaaa atttgcacat ttattggcca aattttcaag  
157441 cttacctacg gctttgaaaa aatcaagctc tccatttttc atcaccgcta aaccgcact  
157501 atcataaccg cgatattcaa gttctttaag cccacttaaa atagtatggt ttttttcatt  
157561 ttttctata taacctaca ttccgcacat tgtttactca cttattaag aatttaatag  
157621 tttttcttca tttttctcta aattgtcatt tttttgaaaa ataaaggat tacgcgttct  
157681 ttggcgtatg gtttgaatth ttgctgcaga taaaaccaa cccaactcgt taaaaatatt  
157741 catcatatat gccattaaac cttgttgatc ttttgtattc aagctaagtt ttgcatagat  
157801 tttagaataa tttaaatcca attttaactc atctttttta atgattggct ttttgatcct  
157861 ttttgaagaa aaaccgctta aatthgaatt taaaagttcg caaagtttga ttttttgctc  
157921 gtctgtaatg atattatcat actcaaactc taaataaatt ttatcatcaa ataactcaaa  
157981 taaattcata aaaaccaat ttaaatttgc taaagcagtt aaaacaatth ctatthtaaa  
158041 atccttaaaa gcaacgattt gaaggcttaa atthgtacta ttgctaaacc aaaatthaaa  
158101 atcattthcc tttgcaaact gtgcaatthc aacaatatct tcaaaagtat tthtaatgat  
158161 aaaaagattg gattthtatat gaggattht atcctgtaaa atggcattth gatctaagaa  
158221 aagctthgtt ctcttaagtg ttaattctth ttttacgcgc cttgcagtht catcgagtaa  
158281 atthtcatca tcaaaactt gttthgcat tcttaaaatt ctatctatca cttataaaa  
158341 aaatggatta cgattthaaag cttthgctth taaccaagta agagtatgca agagctctaa  
158401 ggtthtthaaa tthtcaacct tagaaagcaa agcacatata atgataggat tataaacatc  
158461 ttctthtca gcaagctctt ttaaggcatt gtgatttht aatthctaa gcccaagthc  
158521 aaaaatatca tthtthaaat taaatthaac acaataagct ctatatatac tgcctaaaga  
158581 aatthcattt tcattatthaa tagcactthaa aagtataact aactthtaaa tcatthtctc  
158641 atctgcattt aaatthtca aactctcaag ctctctctc tathtthcaa atthtthtaa  
158701 aagcaaaaat gcttgctcat caaaactata atccccctc tcatcgctta aaaaacgcac  
158761 catacaaaa ggcttacata atthtthtaa aatthcacta tcaagcaaaa gthtthaaat  
158821 gcaaaaacta tgtctthttaa aaaatathth tcaaaaagg gctaaagctt tctctaaatc  
158881 cthtthtcca taactthaaat tthtaagagc aaaaaccaa tctaaatcaa aaacaatath  
158941 ttgatcttct aatccaaca aaaaagtcaa tgcctctgct aatthtthaa atthgtatthg  
159001 tthtthgcgta agatthtthgca atthcattthg aatthtthtaa gctaaaaaat gagtataaaa  
159061 acctatagta tgcatactth gcaaggctth ttgcactaag atthtthcag catctagatt  
159121 tthctthgcc tthctatata tcaattctgc aatctctgta atattgctaa ataaaaatthc  
159181 atctthgatct ttattgctth gcaaattth atcagattht aaggacaata aaaaatcagc  
159241 cgctaaagcgc aactcgctta aatthttht atctataaaa tthaaagcat aatthtthtagg  
159301 ggaatthtth aaaaagaatca acaactthc caaggctcgt aagtgatcta agcctcaaaa  
159361 atctthttht atgtthaaat cthgctthgat aaaaggaagg tthaaatctt taaaatthgc  
159421 aagthaaaat tgagcaaat cgthtthtatt tgcacgaagt atgctatcaa atthtthcctt  
159481 gactgattth aataaaatth tagatccgca tataaatcga gcacctatta tggthtthtth  
159541 aagthcatta ctggcattat aaagccatt tagctctaaa accacataat caatthgcaa  
159601 atgcacatca tthtaatath ctataaaagc tthaatcata ggtthtthaaat gataagcttht  
159661 gatatctth taacaaaaa tthaaagaaat gctthcatt gcacaaagat tathtthtthgc  
159721 atatcttht cthgcaaaa cacaaaaagg tatattatcg cthgcaaggca aaaaatthtthc  
159781 aaaacattct tthtaacta tatcataagt thgctthtaa aatthtthca tathtthtthcga  
159841 atgataaaga ctaaatgat cthgthtthaa aaaaattht ctatagthtth gtgcataggt  
159901 atthgattth tctthtaaaa gthctaatth tthattthaac aatctthtthc tctctthtthaa  
159961 aatthtath ataagattth acaaaaaata tctthtath tggctthtthc ataaactctt  
160021 tthcagtaag caaaattht aatgthttht taaaatthct aatthttht agaatgthaaa  
160081 atcaatgaaa aatctactth aaaaactaga aatgthaaag agatthaaacg aaaaatgaggc

160141 aaatgctcta tgggatttag atctttttac cttagctaaa tttgctcaca aaaaacgcac  
160201 taagcttcat ggaaaaaagg tgtattttta tataaatcgt catataaatc ctacaaatat  
160261 ttgtgcggat acatgcaaat tttgcgctt ttcggcacac cgaaaaaatc caaatcctta  
160321 tcttatgagt catgaagaaa ttatgaaaat agttgatgat actatcactc gtggcactaa  
160381 agaagtgcatt attgtttcag cacacaataa agacacaagt tggcagtggt atttagaat  
160441 ttttaaaatg attaaagaaa aatacccca aatgcatata aaagccatga cagcagcaga  
160501 aattgacttt ttacatcgcc gttttaaaat gagctatgaa gaagtgatag aaaaaatgct  
160561 tgaatatggc gtggattcta tgcctggagg tggagcagaa atttttgatg aagaaatagc  
160621 caaaaaaatc tgcctatggaa aagtaagcag tgaaaattgg ctcaaaattc acaaaccttg  
160681 gcatgataaa ggcagacaaa gcaatgctac tatgcttttt ggacatatcg aagaaaggca  
160741 ccataggatc gatcatatgt taagacttcg tgcttttaca gatgaaagtg gaggttttaa  
160801 cgcattttatt cttttggttt ggcaagaga taatagctat atacaaacag ataagattat  
160861 ggacagtgaa gaaattttta aaacatagc tatttcccgt ttggtgcttg ataatatcaa  
160921 aatatataaa gcttactggg cgaccatgac tttaaattta gctatggttg cacaagaatt  
160981 tggcgcaaac gatctagatg gcaccataga aaaagaaagt atacaaagcg caggaggagc  
161041 aaaatctgct aagggtacta acctaaaaac ctttatcgaa atgataaaaa cagcaaat  
161101 aactcctgta gaacgcgata gtttatataa tgaactaca acctactaag gattaaaaaa  
161161 tggatttttt taaactcaaa gaaaatggca ctaatgttcg aactgaagt gtagcggggc  
161221 taacaacctt tttagctatg gtttatatca ttcctgtaaa ttcaagtata gtaggtaata  
161281 caggcatgcc tatagaagct ttaattaccg caactgcttt aatcaccatt gtcgcgacta  
161341 ctttaaatgc cttttttgct aatactccag tagccatgag tgttggaaat ggtttaaatg  
161401 cttattttac ttttgagttt tgcttgggac aaaaaatacc atggcaaagc gccttaggag  
161461 cagtatttat ctcaagtgtt atttttctaa ttctttcttt tacatccttt cgtctttggg  
161521 ttatacgcaa tatacctaaa gatttacgct tagccatttg cgcagggatt ggatgtttta  
161581 tcgctttttt aggtttaagc caaatgggca ttataagctc taataaagat actttagtca  
161641 gtataggaaa ttttaaaaat ccccatgtac tttttggaat ttttactcta attttaatta  
161701 tttttttttg ggctataaaa ctaagaggag cttttatfff aggtgtttta ataagctcta  
161761 ttatagcttg gatttttggg attgataatg caagctttcc tgagcaaatc ttttccttgc  
161821 ctaatttttag taatgaaaat ggccataggag ctatftttttt agaacttgat atcaaaagtg  
161881 ctttaaatat cgctatgata cctattatcc ttactfttttt tactactcaa ctttttgata  
161941 gcataggcac tattacaggc ataggcgaag gaggtaaaat ttttgatgat gcaaaaaatg  
162001 gagagaaaaa attaggcaaa actctcatgg cagatgctac aggatcagcc ctaggtgcct  
162061 taggcggaac ttcaactgtg actgcttttg tagaaagcac aacaggggtt gaaagtggag  
162121 gtagaacagg atttactgct ttagttgtag ctatfttgctt tgcttttaca ctttttttgc  
162181 ttccactttt taaagccatt cctgcaaatg ccatataacc tgtgcttgta atggtgggaa  
162241 ttttaatggt tatggaagt taaaaatatg attttaaga cagtgtctatt gcagtagcta  
162301 gtttttttac catcattatg atgcctttta cttattcgat taccacgggt tttgcttttg  
162361 gttttctttc ttattttattg gttagaattt ttaagagaga atgggataag attaatcttg  
162421 gcattatagt ttttaagctta atttccttag gaaatttctt actcattgct ttacaataaa  
162481 aaaaaggggg acaaaaatga ttttttattc ttatgaagaa tttaaagaag atgttaaaat  
162541 ttttagctaaa gaaatcaag aagattttta tcctgatgca ctttttagcca tagcaagagg  
162601 agggatgagc ttgggacatt ctttagcagt tgctcttcaa acacgcaatc tttttgctct  
162661 aaattccatc cactatgatg atacaaaaaa acttgatact attgagattt ttaacattcc  
162721 tgatcttagc aaacataaaa aaattctact cattgatgat attgtggata gcggggaaag  
162781 ttttagctgaa attaaaaaag ttttgcttga aaaatttcca catatcgaac ttaaaattgc  
162841 tacgattttt tataaaaaaa ccgctctttt agagcctgat ttttaagatta aagaggctaa  
162901 agaatgggtt gaattttact gggatattca tattgattaa aatctgctat aatagcggct  
162961 ttttaattttt gggagtttta tttgagatta aaattaatat cttgtatttt actcttttagc  
163021 acgatctttg cttttgcaaa tgagcttgat ttaaatgatt ttgaagaaga atatcaaagc  
163081 tataaagtaa atgaccgct ttctggctat aataaagcaa tgacaagctt taatgtaacc  
163141 ttgtatgatt atggcttttcg ccctattctt aaaggctaca atgccaatc tctgaattt  
163201 attcgcacgg gcgtaagaaa tttttttgat aattttttt caccctacg ctttgtaggc  
163261 aatgtcttgc aatttaaat tgaagaagca ggagaagaat ttaaaagatt tagtgcta  
163321 accattatgg gctttggtgg gattatggat cctgcaagca aatgggact taaaaacat

163381 cctgctgatt taggaactgt tttggcacat tggggagtag gaagtggttt tcatatcggt  
163441 ttaccctgtac ttggacctag caatctaaga gatgcattga ccttacctgc aacttgggtat  
163501 gcaagcccaa cagcttatat cगतcctact tgggcaagca tagctataag cgcctatggt  
163561 tttggaaacg aacttagttt taggcttgat gagattgacg aaatttatta taatactcct  
163621 aatttataatc catttatacg cगतgcttac gagcaaagac gcaatgaact tagcaataa  
163681 aggaaaaaaa tgaaaaaaat atttttaatt ttaactttat ctttaaataat ttttgcctta  
163741 caattagatg aaatttcagg cactatgcaa aaaaatatca ataaaagctt gcaacttcta  
163801 caaaacaata aagaagataa aaaacaagct gctgatggaa tttttctaata ttttgatcat  
163861 ataattgatt ataaactcat ggctcaactg agtctttcta aggattattc taaattaaat  
163921 cctaaagaac aagaaaaatt tgctagtgtt tttgaagcaa gccttaaaaa aagctttact  
163981 gataaactca atctttataa agatcaagtt ttaatggtaa aaaatggaga attaaaaaat  
164041 gcaaaacgat attttttaac ctcttcgatg atagtagatg gagaggaaaa aatatcatc  
164101 tttaaatfff ataacaacia taatgactgg cttatttatg atatcgatgt tttgggtgtg  
164161 agtatagttc aaacctatag atctcaatff ggagatattt tagcaaacca agattttgat  
164221 accctgcttc aaaaacttga gaatataact atagaataat gtttgcgaaa ttcttaaaaa  
164281 tttttatffa tcatccaaaa agtactffff ttaccactct ttttatatgc ttgtttttaa  
164341 gcttttttgc ttctaaatta agcgtagatg caagtgtga gagcttgctt ttggaggatg  
164401 ataaggattt aaaaatffff agagaactff ctaaacatta caaaagtgat aatfffftac  
164461 ttttagctff taaacccgaa gatgaaaatc cttttcaaa taaaaatffa aacaaattaa  
164521 aagagcttca tcaagaatta gaacaagttt cattagttga gcgtgtffff agcatcatta  
164581 atgctcctff gctccaaagc tctgaaaata cggacttaaa agaactffta aaaaatatcc  
164641 ccaatataga aagcaaggat atcaacctca ccaaagccca aatgaaatt ttaaacagtc  
164701 cttttataa aaacaatc atttcaaagg atggtaaac aacagggctt atcatctatc  
164761 ttaaaccgta tacaatctat aacgaactca tagaaaaacg cगतcttagc acagatgata  
164821 atgaaaaaga acaaatcgc ctagcgatta aaaaacatca agaacaacia aaagtcatta  
164881 caaaacaagg ctagatacg atcaaaaata tcatcaaaaa atacgaaaaa gatgaggata  
164941 gattctatct tgggtgggta agtatgatcg ctgatgatat gataacttat ataaaatccg  
165001 atctcatgct ctatggaatt tctcttgtgt ttttattggc ttgtgcactt tattgtffff  
165061 ttcgctcatg gcgttttgtc tttttacctc tctttatttg ttttataagc ttaagtgcag  
165121 caagcgggtg ttttgctcct ttaaattttc aaatcactgt ttttcttca aactatgtcg  
165181 ccttagtcct aatcatcact ctaagcgtag ttatccacct catcacacat tttatagaaa  
165241 ttagcaagct ttatccaaaa gctaaaattc aacgccttgt acttcaaacc ctacttgcaa  
165301 aagcaaatcc tagtttttat gccattatta ccacatgat aggctttttc tctctcatgc  
165361 tttcaaatat agaacctatt ataaaacttg gtattatgat gagtataggc atagggcttg  
165421 cacttattff tagctatttg tttttagcaa gtgctttggg acttcttaaa caaaaaaat  
165481 actataaaaa agaatttaaa ttttaattct tagctttttg tgccaagaca agtctagatc  
165541 ctaaaaaacg ccctattata tacatactct ctattgttac cattatctta gctctagtgg  
165601 gtatttctaa actaagggtt gaaaattcct ttgtaaatta ttttaaagat gggagtgaga  
165661 tcaaaaaagg cttattgggt attgataaaa ttttaggcgg aaccttgcct ttagatatca  
165721 ttattcgtff tccaacaat gaaaacaact ctaatttaaa tgatgtattt gatagctttg  
165781 aaagcgaatt tgatgctcta gcgacaaagg atacttattg gtttaattct caaaaaacgc  
165841 gtattgcaaa aaaagtacat gaatffffgg aaaataaaga atttataggc tcggttctaa  
165901 gtcttaatag cttttaagc ttaggaaaaa acatcaatga tggcaaagat ttagatgatt  
165961 ttactcttgc gtttttaac gaaaatttac ccctagaact caaacaagaa cttctttcac  
166021 cttttgttaa tatagaagaa aatgagttaa gatttagcat acgtattata gattctgatc  
166081 caaaactaag gcgtaatgag tttttaacia atctcaagca agggctcgaa acacttttaa  
166141 aaaatgatgg ttagaaaatt caaatcacag gcattatgct actttataac aatatgcttc  
166201 aaagcctfff ttcatcacia tttgatagc ttatffffgt tatcttgggt atctttgtat  
166261 tgtttatcat ttttttaga agtttgaat tttcaattat cgcctactg gttaatatca  
166321 ttcccttaag tatggctfff gctcttatgg gaatffffagg cataccttta gatatgatga  
166381 gtattaccat agctgctata gctataggca taggagtgga tgataccata cattatatct  
166441 atcgttttaa agaagagatt aaaacaaaa gcgtagaaga agcgatttta gcctcacatc  
166501 ttagcatagg atcggcactt tattatacaa ccattgggtat agttttaggc tttagcgtaa  
166561 tgatgagtag caatffffat cctacgattt attttggagt ttttaactgta tttgtaatga

166621 ttttgctttt aagcggaagt ttgtttttac tccaagtct ttttaattaca atttatacta  
166681 agaaaaccaa agcttttaac ccgtataaag tacataaata aagacaacta ctaaaatata  
166741 tctgatgaaa tttctcactc ttttccttta tttaaaactt ttaaaataat ccttgcaagt  
166801 tccaaagcct taaagcgatg tgagagttga ttttttcat tattgctaag ttctgccaag  
166861 gttttatcaa agccttttagg gataaaaagg ctatcatagc caaaaccatt ttcaccctt  
166921 tctatatcga tcacatctcc atgcatactg ccatgtgttg tccattcgcc acctaagctt  
166981 accaaagcaa tggcagccac ataatgggcc ttgcttgttt taaaaccaa agccccatc  
167041 tgttttacia gctcatcacg attgctctta tcatctcctt tgccactaaa acgagcagaa  
167101 taaattcctg gcttaccacc caaaacatca acacaaattc cactatcatc acttaaaaca  
167161 atgaaatcat ttttttgttt atcactcaaa gccttaaaaa cagccctcgc ttttataaga  
167221 gcattttcct taaaactatt gccattttct tctatttcaa aggcgggttaa aatttcatca  
167281 aaggcataaa tttcaaattc ttttaaaagt tcttttaatt ctataacctt gtgtttattg  
167341 cttgttgcta ataaaatfff cattatcttg ctccaaaaat tgaattatft tctgctaaatt  
167401 atcattttta atcccttgcc aaactaagaa aaaatcaagt atattccata taaaagagc  
167461 gatgatatta aaaatccata ctacaagcat agaagatgaa tcgaaaaaac ctgagataag  
167521 caaacctata aaaataaaag cccacattgc catttttaca aaaccaagcc ccatatcccc  
167581 tttataaaaa cgatcaaaag taagccccga taaaataaaa gcagggtgta cgcctaaat  
167641 aagtcctata atgggatttt tcaattccaa agaacaaaaa taaaacattg cctcatcgct  
167701 taaggtttcc aatttatcct tataatccat caataactcc gaatttactt taccttctgt  
167761 cattaagaa aaagtttgaa aacgattcat aaatctatcc ttttaaaaaa ttaaatcctt  
167821 acttttttaa gcctttttaa aagataaaat aaaaaactta acaatcctta atataattca  
167881 tagtaaaatt atcttttttt gtaaaatfta agatfttttag gaaacaaaaa taatgttaaa  
167941 taatgtctta cccctatcct ttatcgttg gacaagattt tttggacttt ttatagtttt  
168001 gcctgtgctt agctttttac ctcttgaact ccaaggcgca aatgaatttt tagtaggact  
168061 tctagtaggt gtttatgctc taaccctaat ggcttttcaa atgccttttg gaatactaa  
168121 cgataaaatt gggcgtaaaa aaactatgct tatagggtctg attatcttta ttatagggtc  
168181 tttaatctgc tcttggactg ataataftta tacaatgcta gtaggtagaa tgcttcaagg  
168241 tgcaggtgct attggcgcag tagctacggc aatgattagc gattttatca ccgaagaaaa  
168301 tgcggtgtaa gctatggcga taatgggatc ttttatagga ctatcttttg cagcttctat  
168361 ggtaatctcg cttttaatga gtgctaaatg ggggctttct agtctttttg atcttagtgc  
168421 tgctctatcg cttttatgta tcatcttgct ttatactgtc gttccaaaag aaaataaaat  
168481 cactcatgaa aataccaaaa ctcttttttt acatcttatc aaacaaaaaa atttagccct  
168541 aatgaatttt accaatttca tgcaaaaaat gcttatgagt atagcatttt taagtattcc  
168601 tatcatttta gtaaaacatt taggctttga tgagcataag ctttggattg tctatacagc  
168661 atctatgata gcaggtttta tcccatggg attttcggga agcttgggagc aaaaaagagg  
168721 cttagcaaag caaattttac ttttagggat agcttttttt atcctttctt atatcttttt  
168781 tgttttttct aattccatta ctttttttat cgttgcagtt gtgatatttt ttatagggtt  
168841 taacttgcac gaaccatta tgcaaagctg tgcttctaaa ttctgtaaag tacatgaaaa  
168901 aggtgctgct ttaggacttt ttaatgcttt tggatatggt ggaagtttta taggaggtgt  
168961 aataggaggt atatttttac atcttaacaa attagaattg ctggctatta ttttagtagc  
169021 tttgtctatt gtttggttta tagccctact atatttaaaa aatccttctg aatttaaaaa  
169081 tttttatttg ctttagaaa caactfttaa ttttagcgaa ttttaataaaa attttaggtgt  
169141 tgtagatatt tataaaaact caaaaaacct agtcattaaa tttgatagca agctgacaaa  
169201 caaagaagaa ttagaaagta aaattftaat caaaaataaa aaaagcttga aatttgattt  
169261 ataattttat tttctaagga aagctgacaa cgctttttat cactaagata agccgtgcgg  
169321 gcaaataagc ttgttttttg tggggatttt ttagagctaa tttgtatatt tacttgcata  
169381 gtatagtaat tttcaatata ccattcccca ctattttcaa aaggatcaaa atcataaaaa  
169441 aatcttcccg aacttghtaat tctttgggca taagaatgct ttttaaaatc tacaagattg  
169501 atcaaaattt cataatcagc attcaagat acttctttta atcctaaatt ttttaagcctt  
169561 aaagctaatt catcttttag agcactttga attttacttg gattttgcaa agtgatacta  
169621 aaactttgcc cttgtttggc ctttaaaaaa atgccttcat tgcttgtttg tatagagctt  
169681 tgaacaaagg cagactttgc acaagcactc aaaaagagt gtagaaataa agctgaaatt  
169741 agatgaattt ttctcattat ttgatgatgg ttggagtagc actaaggcct aaagaacgat  
169801 atttttcata aagagaaat acttctttta actcgtatc gctcaccttt ggataagatt

169861 tgatatttgc gtcataatat ttatttataaa tagctatfff ctcacatca ctcttagcct  
169921 ttttactctc tttgtaaadc aatgctgatt tttcaaaagc tgattttacca tgcactggag  
169981 ttaagatata attgacttga taatttttaa gctcatcttt aatctgtgct aaatgatctc  
170041 tacaataagg acattctgga tctgaaaata cataaatagc aggtttgctt ttatcgccta  
170101 aagctataag cattgtttct tcttgaacta cgggtttaac atttttagtg aaatttgccc  
170161 tagcctcttg gaattttttc atttcatatt cttgagcata agaagtttta gtttttaaat  
170221 caataatadc aggaacgata agattatctt ttgtaaaaag aatttgctct tgcttttgct  
170281 cttcaagcgt tadcgtaaca atcacgcttt caaagcctgt atttccaacc ttttggcgat  
170341 tacctatact cactgttgca tttggaaatt gtgctttaat gcttttagaa taaaaatcac  
170401 tgatttcaga attgctagca gcaaataaag acattgagca agcaaggatt aagcttattt  
170461 ttttcattta ttttccttaa aatcaaatat taatgtttta ttttataatg atattctaaa  
170521 tttttgtttt taaaaatctt ttttcgtcct ttttttgcac tctctcatct ttatcaagggt  
170581 attctaaata agctatggca tttttcttg aaagattaaa acgctctttc atactctgta  
170641 tatcaaggct ttgactcttt aaaatttcta ggcattcttg cataagttta tctaaggcat  
170701 ttttttctac aaaaagattg tgagaaagtc ttataacacg attttgcttg gtaagttttt  
170761 ttaaaatttc atctccactt tttctgtcta gttctaaaaa ttcataataa ttataagggg  
170821 cttgaggttt tatgccttgt tttttaagta tattgtatag ctcacatttg tttctttctc  
170881 taagcttttc ataatcaatt ctttttttaa aatacacccc cttttcaaat tcaagtaaat  
170941 ttgatagatt ttgaagtcca aactcgcaaa attccgcact ggccaagga agtcttaggg  
171001 ccaaagaagt tgctgaaagc atggcataag gatttttttc aagtataaaa gaaatgaatt  
171061 ttttaagctc atctaaggct aagagattat aaatattaag atttttttca tctataaaaa  
171121 ccccacttaa ttctttggct aaatttaaag cttcttcgtg acttaactta aatctttgggt  
171181 aacttgagag caagccaaag ccatatttat gcgtgttttt tagaaattca aaagcctttt  
171241 ttaattcttt atttttcaaa agcattaaaa atttattttt ttgttccttt ttcaaaggct  
171301 cgctcacagg atttaaaacc tctcctccgc ccacaacacg attattttgc aataaaataa  
171361 atttttcatt aaaacataaa aaaagatttt tttcaaattc aagatgagca aaaaattcat  
171421 tttttccaa ctcttttaaa atacttatct tacactctat gctttttgta cccacacaaa  
171481 aaagcatttt ttcatttttt aatcttttag ctttaatcaa aacatcacat tctttaaagc  
171541 ctttaaaaaa accttttttg cttaaaacat aacctttttt taattcttta taatcacaat  
171601 ttaagctcaa agccacacgg ttaaaagctg aaatttcatc aaaattactt tctgtatttt  
171661 gtatattttt aactacaagt tctttttgat tgtcaagaca aatgattttt tcatrttaggg  
171721 aaattttacc ttcattgagg cttccagtaa ctatggttcc tatgcctttt aaagaaaaaa  
171781 ccctatcgat ataataacga aaaacaagat tttcattagc attcttgcac tctaaattta  
171841 aaagataatt ttttaagcgc tcaatgcttt cttgatcttt tatcgaagta tgaaacactt  
171901 tcataggtgt aaactcaagt gagtttagaa ttttttgctc ttgctccttg ggattttcac  
171961 ataaatcgca tttactaagc actaagataa tatctttcac acctaaaagt tcaagtactt  
172021 ctaaagtgtc tatgctttgc tcttttaaac cctcattaat atcgactaca aataaacaag  
172081 cactaaaacc aaaagctcca cttatcatcg ttttaaccaa gtctttatgg cctggccat  
172141 cgataaaaga aaggtgtttt tgcttataat ttaaattaga aaaacttaaa ttaatcgtga  
172201 tttgtctttc tttttctct tttaaactat ccccttcaaa accatttata gccttaatca  
172261 aagaagtttt tccatgatca atatgccctg cagtaccaat tagtagtgaa ttcataaatt  
172321 ttccatagta ttgataattt gaattaattt tgataaatct ttttctctaa ttgtcctaaa  
172381 atctagcaca aaagcttcat tttctatacg ccctatgata tttttttctc taaatttttc  
172441 ttgcaatttt aaagcattgc catcaaaagc taaaatacaa gtttctaaag ttttatcagg  
172501 catagaacca ccccctacca aacttttact cattttcaat tcacttttaa cctgaatttc  
172561 attttgcacc cttaaagctt tttctttaat ataagtgatt tctgcattta aaagctttta  
172621 acttgtgatt ttttcgtagt ctttttcaag ataagcctta agactttcat ttaaaaaagc  
172681 aagtgatgatt ttatccactc ttaacattct tagcagttga ttttctttaa ttttatcaat  
172741 caattctttt ttaccaagta taattccagc ttgcacactg ccaaaaagct tatccccact  
172801 aaagctcaaa atatcacaat gctttatcac atctttgact ttaggctcgt tttttatcag  
172861 ttttggattt aaattctcac accaaccgga acctaaatca taataactca aaagctcttt  
172921 ttcttttgcc aaatttccta aatccttgat gccaacctca ctatgaaaac caatcaaagc  
172981 gaaattagat ttatgggttt ttaaaagcat tttagatatt tcatttatag ctttttcata  
173041 atcttttaaa tgtgttttat tgctcgtgcc tacttcaaa agctttactc ctgcagcttt

173101 aatcacttca ctcacgcgaa aacttccgcc aatttcaaca agctcgcctc ttgaagtgat  
173161 gagttcttta tcaaaaacaaa gagaatgaag caccaaaaaa actgctgcag cattgttght  
173221 tacaaccaa gcatcttcgc attcaaaaag cattttaagc ttttcaagca ctaaagcata  
173281 gcgactccct cttttaccgt ttttctaatic aaattcaata ttagcataat tgcaaagcac  
173341 atctttggac ttttcaaaaa tactctcatc aataaactg cgcctaataa ttgtatgaat  
173401 aaccacacc gtagcattaa tgacactttg taaatctttg agtaaatggt tttgaatttc  
173461 ttgctgtatt ttttctaaaa tagtattttt atcccatgaa ttttcagtta tattcgcctt  
173521 gagtttagca acaaaccttt tgcaaaaatg agatcttaaa taaaaaggat attcctttta  
173581 actctcatca tcaatcaagc ttccaatttg cggaaaagtt ctaaatttgt tcatcttaag  
173641 ccttaagaaa atatttgggt attttaccat agaatttgac aaattgacaa tcaaggaaaa  
173701 tcaatgaaag actttgtttt catacaaaat gaaaatctta ttcccttgcc tgatgagata  
173761 aatatttggg gaaaatgcaa ggatgaagaa gttttaattt ctaatgaaaa agcacaacaaa  
173821 gcacaaattt atgctccaga aattaatttt tatcttaaaa attcacaaga tgaattttta  
173881 gaaagaagta aaaacatatt aaaactttat gaagctaggg caaatgtcta tgatttagga  
173941 cttgatttag aacaaaacaa agaagtaaaa aaccgcatta ttttggtaga ttctgatgat  
174001 gctatggctg atttttttta aaaacaaaat tttaaaatca taagcttaaa aatgaagaa  
174061 attctagcgg tatttggcag tataggcgag ctttgcgctg tgatttttaa tcaaggagaa  
174121 gaagtagaaa ttgattttga tattttactt ttaatacaa attctaacga aattcgaag  
174181 gattttacaa gacaaagtgg ttgttataat attagcaatt ttaaagatca agaaagtta  
174241 cttgaatttt tacaagataa aagtccaaaa tacacatata aaacctatat cacctatgat  
174301 tctagtgtgt gccaatacca cgaaagacgc agtgagcatt gcgcaaaatg tgctgaaatt  
174361 tgtcctacgg tagccatttt aaaagatgat gaaagcaagc atttagaatt ttctcaagta  
174421 gattgtctag gctgtggagg ctgtatcagc gtatgtccta gtggctcgtc tgattatgca  
174481 cccatgccta gggaaagttt ttttgaactt tgtgaatttt ataaagaaaa aaagatttta  
174541 atcataccta aaaaaatgct tttagaaaa ttaaacataa aactaccaa agatgttcta  
174601 cttttatga tagagggtga aaaatggctt tcttccatgc attttctaac tcttttgcaa  
174661 agcagtgggt caaatttgggt tttttatagc gattttattt cgcgaggaag tgctgaagcg  
174721 atagatcttt taaacacttt ttttgaagaa aaatttcaaa aagaagctat ttttacagcc  
174781 aaagatgaaa aagaattgca aaacgcttta gaaaagcaag aatttataga aaatttaagt  
174841 tttgattttc acaataacac tcttaccact agagaaaatt ttgcaaaaag aatgcaaaat  
174901 ttaatccaaa atgatgattt tggcgtaaaa gaaagtgggt aatggttaag atatgaaaa  
174961 atagaaatca atgcaaacac ctgtactctc tgtctttctt gtgtaggagc ctgtaatgta  
175021 ggagctttga ttgccgatac taaagaaaaat gcactcaaat ttaatgcttc attatgcacc  
175081 acctgtggat actgcgaagt aagttgtgcc gaaaaagata ctctaaaact tacgcgtagt  
175141 ggaatggaat ttaatccaag ttattttgaa taccaacca tggcaaaaaga tgaacttttt  
175201 gcttgtatag aatgcggaag agaatttgct accaaaaaag cggtagaaaa aattgcaaat  
175261 ttaatgaaac ctaaatttgg taatgacgag agcaagataa aaactcttta ttgctgtgca  
175321 gattgtaaag caaaggtgat gatacttgcc atgcaaaaaa gataaaatcg atttttgagt  
175381 gcgaatttaa tattttaatg gtgtataaat ttcaaaccct ttctatataa aaagcagtct  
175441 tttatctttc taagcgggtt ttgaaaaaaa gtagaataat taaaaatata ctgaaatata  
175501 ggcaaggaa gccgatattt ttaaaaatta agcaaaatga gctttgattt gctctacca  
175561 agcgtcaatt cttgcttcag tttgatcttc ttgattgtca ttatcaagtg caagacctac  
175621 aaattttcca tcaacaactg catcgttga ttcaaatgta taacctacag ttgaaacttc  
175681 acctactaaa tttgcgcctg cattttttta attttctgca agttttcca taccgccgca  
175741 gaaagtgtct gaatagcttt cgctatcacc cattccaaat acagctacag tttttccacc  
175801 aaggctaaga cctgaaaaat caaaaccatc ccaatcatct tgtaaatcgc cacttccca  
175861 agtagaagtt ccacaaatta atttatcata agaattaatt ttagctgcat caatatctgc  
175921 aacatttaaa acatcactaa ttcttaattt tgaagcaatt gtatttctg ctccttctgt  
175981 atttccata gcacttccat aaattactgc tactgacatt attttctcct tataagttta  
176041 tttgttattg aatacgggac taattttaac atagttttat ttaaatcgca taaaaaatgt  
176101 tttatttgaa caaaatgtgt gaagtttttg ttacgcggac aaactatgca aatttgttca  
176161 aattgatttt gatataataa ttttagatatt ttttgaattt cactatcgat atttaaattt  
176221 tgaagatcta cttctttgca aagaggcaaa accgcaattt tattatctat gataatcaaa  
176281 ttatcatttt gaacaatgct tcgattttga ttttgatgag aaattttatc atatacataa



176341 aaatcaaata aaacttgtga atcaaaacaa atacctctaa aataagccct taaaagtctt  
176401 aaaatatcga cattttgaaa tatttttagtc ttgaaaatca aaccctttct tttttgaaaa  
176461 taagaaatgt tcaaagtaag gtttttgtcg atatttttta ttttaccaa aggcatatgt  
176521 atcgcatctt gcaagaagtt ttgaaaaggc ttttttaaat tttttgcaact tcttgcatat  
176581 gaaagcggga ttcttaaaac actatcaaca ctagcattgt attgaaatcaa aaaagttttg  
176641 acaagctctt gcttacataa agaactataa actttaggga taaattctct tttatcttca  
176701 aatccaaata gcattattct gccttagagc aagaaaattc tttatctaaa ttaaataatct  
176761 tacaatactc acaatacaca caacttacac ttctttttgc acaaactaat ggaatttttc  
176821 gtttttttagc ctcatTTTTA atttttttca tagtattgtg atttaaaaaa cttgtaagca  
176881 tcactataca ttctgtatca caaggaatgg gtttgcgatt gactctattt tcattgcgcg  
176941 catcccaatg ctctattttc tttgcaccta aatcatacaa aacagcctta atagggtgta  
177001 tttcatctgc accaataacc aaaactgaca taagctctcc tttgtgattt ttatttttaa  
177061 ttattttgat aattattatt ataataaat caaactaaat ttattttgaa atttattatc  
177121 atttatatta tttatcgatt tattgagttt aattcagtta actttaattt ttaatagata  
177181 taatttctca attaataaaa attattattt aggagaaaat gatgaaaaa ttaactaacg  
177241 acttcgaaa tattatagcc gataatcaaa actctttaag tgcaggtgca aaaggccctt  
177301 tacttatgca agattatctt ttacttgaaa aacttgctca tcaaaataga gaaagaattc  
177361 cagaaagaac agtgcacgca aaaggaatg cggcttatgg cgaaataaaa attacagcgg  
177421 atttaagtgc ttataccaaa gctaaaattt ttcaaaaagg tgaagtact ccattgtttt  
177481 tacgcttttc aacagtagca ggtgaagcag gtgcagcaga tgccgaacgc gatgttagag  
177541 gttttgctat taaattttac accaaagaag gaaactggga cttagtagga aataacactc  
177601 cgactttctt cattcgtgat gcttataaat tccctgattt tatccatact caaaaaagag  
177661 atccaagaac acatttaaga agtaataatg ctgcttgga tttttggagc ttatgtcctg  
177721 aaagcttaca ccaagtaacc attcttatga gcgatagagg aattccagca agttatcgtc  
177781 atatgcacgg ttttggaaag catacttata gctttatcaa tgacaaaaat gaaagatttt  
177841 gggtaaaatt tcatttttaa accctacaag gcattaaaaa tcttagcaat aaagaagccg  
177901 ctgaacttat cgctaaagat agagaaagtc accaaagaga tctttacaat gctatagaaa  
177961 ataaagattt cccaaaatgg aaagttcaag ttcaaattct tgctgaaaaa gatgctgata  
178021 aactaggctt taatcctttt gatttaacta aaatttggcc gcatagcata gtgcctttaa  
178081 tggatatagg tgaatgatc ttaaatacaaa atccacaaaa ttattttaat gaagtagaac  
178141 aagcagcttt tagcccaagc aatatagtac ctggtatagg ttttagtcct gataaaatgc  
178201 tacaagctag aattttctca tctctgatg cacaaagata tagaatagga actaattatc  
178261 accttttacc tgtaaactgt gctagaatg aagtaaatac ttacaatgtt gcaggtgcta  
178321 tgaattttga tagctataaa aatggtgctg cgtattatga gccaaatagc tatgaagaaa  
178381 gcccaaaaga agataaaagc tatcttgaac ctgatttagt tttagaaggc aatgcacaaa  
178441 gatacgacc tttagataat gatttttaca ctcaaccaag agcgttgttt aacatcatga  
178501 atcaaaatca aaaagaacaa ctttttgaaa atatagcagc ttctatggaa ggtgtagaag  
178561 aaaaaatcat tgctagagct ttaggacatt ttgaaaaaat ttcacctgat tatgcacaag  
178621 gtatcaaaaa agcttttagga aaataatttt tacttgccac tttttaaggt ggcaactaa  
178681 agattataaa taaaggaaaa atgatgataa cacttagctt agaagaagaa aaaagatttg  
178741 ccgaactttg caaatggct ttttaattttg ctgaaacaa tgaatatgaa aatcttaaaa  
178801 tcatgataga agcaggattg aatgtgaatt taaaaacaca taaaggagat accctgctta  
178861 tgcttgagc ttataataat tcttacgaat gtgcaaaaat gcttttagaa aagggtgcac  
178921 ttgttgatga aaaaaatgat cgtgggcaaa cacctttggc aggggtttgt ttttaaggct  
178981 atttgcctat gtgcgagctt ttggtaaaac acggagcaaa tatagatgaa aataacggcc  
179041 taggtatgac gccttatagc tttgctatca tgtttggccg taaagatgtg gctgagtttt  
179101 tactcaaaag ctctaaaaaa agcttaagta aacgccttc ttttaggaatt ttaaaattat  
179161 ttaaaaaata aattctatga tttaaaattc tttaaatacc tataaacact aggctctgaa  
179221 atttttaaga gtctagccac tataggcaca gaacccttga tattaaaaaat acccttttga  
179281 tataaagttt ttgtaatctc ttctttttgc gctatactga gttgatagtc tgaatttaaa  
179341 taattcatat caatactttg ggctaaaatt tcttctatag aatgacttag ggtttctata  
179401 tttcctaaac tatccacact ggtattattt tctttatttt gatttaaaaaa ttcaccata  
179461 tcgtctaatt tttctatctc tataatctta caaaccaat ctctcatcat actagtatcg  
179521 tgattgatac ataaaattcc cactaattca tcagaatttt ttataaaaaa tgttgaacct

179581 ctaacaagtt ttgattttcc gattaaagcc ttataatcac acaaaaaatc ttctttttaa  
179641 taagctttat tttgcacaag ctactcgca aaagcactca aaggagactc aagagttcgg  
179701 ccacttacat ggctgtttgc aatagctgct atataagcac cctctttaga aagcacatga  
179761 aaaactactt catactgctt gcctaaaact tgcctaaaaa aattcgtaag ctttacaat  
179821 tgctcaatth gtttttcgct catgaaaata ttcctaaaaa ataaatthag aatccaaagg  
179881 ttaaatttta actttaatth tttaaaaaca ttcttaaaaa taatatttta ttattgtgat  
179941 aataaaatat tgacaaatta ttattatcgt gataaaatac atttgtttta tttacattaa  
180001 caaaaaagga gaaaaaatgt caaattatcc aaaggctatc ggcccttatt cagcttatag  
180061 agaagcaaat ggctttcttt ttatctcggg acaaatccct atcaatccag catcaggaga  
180121 gatagaaagc tctgatatca aagagcaaac caaacaatct ctaaaaaata taggagctat  
180181 attagaagaa aatggaatth cttacgatca agttatcaag acaacttgcc ttttagcaga  
180241 ttttcagat tttgctgcct ttaatgaagt gtacgcacaa tttttcaaat ctccatatcc  
180301 tgcaagaagt gcatttgtag taaaagatat accaaaagga gctaaagtag aaatagaagt  
180361 tattgctaaa aaaggataaa acatgttagg ttttagcttt tctttattta gcgtttttt  
180421 gcttgatth atgctttata aaaaaatcaa tgcccatatg gctttgcttt taagtggact  
180481 tttactactc agtataacaa gcttggctaa ttttttaata catacttcc ctgaaaacta  
180541 tgtattgtta aattatccta atatttacgc ttttttaaat gcttttagatt tttaccaatt  
180601 aaagcatgca attcttgaaa aagattcttt aaatttaggt ttttttgata tctttcaagt  
180661 cttaaccaa accatgtcaa atactctagc aggttttagga ctaacactaa tggctatagc  
180721 aggtttttct gcttatatgg atcatgttgg ggcttcttac gcactcttta aagtttttga  
180781 aaaaccttta aaaatggtaa aatcccctta tttttactt ttagttgcat attttatcgt  
180841 gcaatttttg gttcttttta tcccttctca tgcaggttta gggcttttgc ttatggttac  
180901 tatgtatcct atattgggtc gctctggagt ttcaaaactt tcagccctaa gcgtaattgg  
180961 tatatgtcaa tatatcgatc atggctctgg aagcggcaat gtaatcatgg cctcagaaaa  
181021 agctgaaatt gatcctgcta tttatthtgt tcattatcaa ctccctacaa ccctacctat  
181081 cattgtagct gtaggtattg ctatatatth ttgcaataaa ttctttgata aaaaagataa  
181141 ttttgthttt aatgctcaag aagtagaaaa agaactcagt gaaaataaag ataaagaaaa  
181201 tgaacttaaa aaacctcaa aaatthtgc tatcttgcct gttatacctt tagtattaat  
181261 acttgatth agctctgtgc tcgatagcat tttggthttta atgggaatta gtaacgaaga  
181321 agaagtaaaa gctgcagcta gttcagctat taagatgaat gttcctgtgg ctatgggtgat  
181381 ttcaacttht gttgcgattg cthttgaaat gatacgtat aaaagcgtag tagaaact  
181441 taattctatt atgattthct ttaaaggaat gggacattta tttgtcatca ctgtthcttt  
181501 gatagtgtgc ggtcaagtgt ttgcaagtgg gctthtatct gttggctttg tagatacttt  
181561 aatagattht tgtaaaaatg caggatttgg agtacttgc atcatcatcg ctgtthcaat  
181621 tttactcgca gthttgtcct tcttaatggg ttcaggaaat gcagcattth ttagctthtgc  
181681 cccacttatc ccagatatag caaaacgctt tggatttgaa actattacca tgatagcgcc  
181741 tattcaaatc atgacaggtt ttggaagatg tgttagccct atagcacctg ctatthtagc  
181801 tatctcagct attgcaaaag taagtcttht tgctgtgggt aaaagaacag ctatthctat  
181861 gcttgtagcg gctattgtaa atattattat gacttatatt tatctthtaa aggagaaaaa  
181921 atgaactcaa aaactaaact tattcattgc ggtagaggcg atcaaatgt tgaagtaaga  
181981 tcagttaatc ctacgcttat cgtgcatca accatactth ttaaagatca tgccacttgg  
182041 caaaaatata gagaattaag aaaaacagat cgtgtattaa gctatggcgc tagaggaacg  
182101 acaaccaact tcgaactcga aaaacttatc tgcactthtag aaggtggcta cagagctcag  
182161 cthttcccaa caggacttgc agcacttgc atggtgctth taaactatgc tagcaaagac  
182221 gcacathttt taattactga tgcaathttat gggctgtgga gaacaathtt cgaathttt  
182281 ttagaaaaaa tgggtgttga gattgathtt ttaaaagccg atgcaagcga tgtagaagaa  
182341 aaaatcaagc ctaatactaa gctcattcta tgcgaaagcc ctggttctat actthtatgaa  
182401 atcatagatt taccaaagct ttgcaaaatt gcacactctc ataathttcc tgtagctatt  
182461 gataatactt attcaagcgg atacttctta aatccactt agctaggcgt agathtttgc  
182521 gttatagctg cgacaaaata tcttagcggg cactctgatg ttactatggg tgtagtagtt  
182581 atcaatgaaa aagaatggaa aaatthtgac aaacttctg aagctthtag cthtacaaca  
182641 agtctgatg atgctthttt ggttcttctg ggtatgagaa cthtagatgt aagaatgaaa  
182701 gctcatgaaa aaagtgcaga tgaatcgtg gaathtttac aaacaagaaa ggaaathtaa  
182761 actathttct atccaaaact caaaacctat ccaacctatg aaathtttat gcgcatcat

182821 aaagtgcta atggtatggt tactatcgaa tttgcagagg gttatagtaa agaagatgct  
182881 attaaatg tagatgagtt agaatatg tccataggtg cttagctggg tggctatgaa  
182941 agtttagcaa ctgtaactac tccaccaaga actgcaacag attggagcaa aagaggtcca  
183001 tttgtaagat ttcatatagg acttgaagat actaaagact tgattgctga tttactaag  
183061 gcttttgata gcattaaaaa ataaggaaat aaaatgactg gaattagtgt atttgatcat  
183121 aaattattag cagattcatg gagcacgcaa gatatgctg ctgtttttg tgaagaaaat  
183181 cgcatacaaa aatggctcga tgttgaagca gcattagcaa aagcacaagc aaaacttaat  
183241 atcatccctc aagaagcagc agatgaaatc gcaaaaaaag cttattataa atttatggat  
183301 atggatttta tctttaatga atttaaaaaa accaaacatc ctttagttcc tactgttagg  
183361 ggcttagaaa aagcttgca taataatg ggtgaatatg tacattttgg ggtaaccact  
183421 caagatatca ttgacacagg acttgttttg caatttaaag aagctatgac tcttgtaaaa  
183481 agtgaattaa aagccattgc aaaagcttta gcaaaaactg ctaaaacaca caaaaatact  
183541 gctatgatgg gaagaactct tgctttacaa gctttaccta tcacctttgg gcataaggta  
183601 gccatctggc ttagcgagct tgatcgcat tttgaaagaa tacttgaact tgaaaaaaga  
183661 ctttatgtag gcagcatagt aggagctggt ggaactaaag caagtttaag cgatgaatgc  
183721 aatgaagtag aaaagctaac tttggaaaat ttaggacttg aagtaccta tatctcttgg  
183781 caacctgcac gcgatcgttt tatagagctt ggttttgtgc taggcaatat caatgcaact  
183841 tttacaacaa tcgctcatca attactcata ctctcacaca atgaaatcga tgaagtagca  
183901 gaaccttttg gcaagggca agtaggatct agcactatgc cacacaaaag aaatcctgcg  
183961 gtaagtgaat atgctgttac tgtaagcaat gcctttaaag caaatttagc gatcttaagc  
184021 gacatagaaa gacacgagca tgaagagat gggcaagttt ggaaaatgga atggaagctt  
184081 ttacctgaaa tgtttttaat gctttctgtg gttttagcaa atatgaaatt tgcccttagt  
184141 gatctagaag ttaaaaaaga taaaatgctt aaaaatcttg acacccttaa aggctttgta  
184201 ttagcagaac gcgttatggt tgcgctaagt gatcattacg gcaacaaca cgccatgaa  
184261 attgtttatg aaaatgctat gctaggtatt gagcaacaaa aaactttcaa agaagtattg  
184321 cttgcagata caagagtatc tcaagtctta aaagaaaaag atatcaacgc tttacttgat  
184381 gcaacaagct atgtaggata tgcgcctaaa ctggtagatg aatttttaga aaaaattcaa  
184441 aatcatgcta tttacaata ggaaaaacga tgttatatag cgaaattttg gcggatttta  
184501 ttttcaatct tcagtatgaa aatatccctg atgcagtcgt tcaaagggct aaagagctta  
184561 tgcttgatag ctttgaacg gccatagcag caagtaagga agaatgctgt ttaaacgcct  
184621 ttaaagcttt tgaaaattta agcacagaaa aaaatacccc tgtatgggta aatgataaaa  
184681 aactagatcc ttttatgcg gccatgctaa atggcattgc ttctcagca cttgattttg  
184741 acgatacgca tacagaagcg attttcatg caagtgcgat ttttaactcct ctttgtttaa  
184801 attatggttt tcatatcagt aaaaatgcta aaaaattat aaaagctttt attgttggct  
184861 gggaaagtgc tgctagagtg ggcatgcaa gcaagggac tttccacaag cgtggttttc  
184921 ataccacagc tatcgctgga atttttggaa gcgagagtc gagtgcggtt ttacttgatt  
184981 taaacaagca acaaatcatc aatgctttag gacttgctgg aagttttgca agcggatta  
185041 atgagttctt atctaattggt tctaattcaa aagtcttgca tatagcaaat gctattaaaa  
185101 atggaatgctt agtcgctaac tttgctaaaa ataactgag tggaccttta agcatttttg  
185161 aaggcagggg taatatcttt aaatgttttg gcatagaaca agaatgcatg aaaacagaac  
185221 ttgataaagg cttgggtgaa atttggcaa gtatgcaagt ttctataaag ctttatccaa  
185281 gttgtcattt tgctcatggt cttattgatt gtgccatagc tttaaaaaat gatggcttga  
185341 aagcagatga aatcaaaagc attcgttggt ttgtagatga agttcctatt tcttttattt  
185401 gcgatccttt agaagcaaaa tatactcaa atagtctta tgaagctaaa ttttccatgc  
185461 cttttttgat ggcttttagt ttttttgatg gtaagattac tcttaaatcc tatcagaatt  
185521 taaaacgaaa agaagtactt gaatttgcac aaaaaatcac ttatgaaaaa agaaaatctc  
185581 aaggttttcc aaaatatttt cctggacata tggaaagctat tttgcaagat ggaaaagtga  
185641 tttgcaaga tgtttttatc aataaaggta attttgacaa tcctttaagc tttgagaat  
185701 taaaagataa attcatcaac aacgcaaaag aaaactcac catggataaa attcacgata  
185761 ttttagaaca aataaagcat ttagaaaagc aaactgatct ttcattgtaa gtcctaaaaa  
185821 gacttacaat aactccttac ctatttcttt tagctaagtt ttaatctatc gtttctctc  
185881 ttgctttcat ttgtgataat taaaaagca ttcttaagtt agcccataat cttgctttga  
185941 cattgtgttt ttcaaagctt agaatgtttt ttcataggct tagatgattt tcaaattctt  
186001 acgcacttca tcaactagtc aagagtattc atttaaatgc gtaagttctt tagttagggt

186061 tttagcatta tcgttggttc tatcattgtg atttaatgca ggttgttttt taggattgca  
186121 atgagcggtg gcaatTTTTG gcatattcta caaatccctt ttctttgtat tctgctatta  
186181 tctcatcact acttagatta tatgcactca tttttactag cataataata tcttcttcat  
186241 ttgcaaacat atcttcaata gcgtgtccgc aaatggtaga ttttaatttct tcatagtctt  
186301 ttttgcttac atcatcttta ttttttttaa gtattgcaag gctttcttct aagctataca  
186361 cttcgggata ttgtttttgc atttttaaat tttttccttt tttttgggtg tttaaaagct  
186421 aataaaatca aaaaatcatt tattgatttt agttgatttt attagcgggg ttaaggggtt  
186481 gcacccctta caagctcgac acttggcaca agtggcagat agcttgtatc cttcaataag  
186541 ataattatag caaatTTTT acctaattccc attcctaaaa gtatcaatca ttttaaaaaa  
186601 ctgctcttgg ttttttagcat taaagtgcac atgatttcca aagtttaaat tctcatactc  
186661 atctcttata agctctactg caataatttt aaattcatta aaatcaaaat cgttaaattg  
186721 ccaaagctta tcattataaa caaagcggac ttgattaagt ttcattattgt ttaaaatttt  
186781 taaatatttt tgctcatcgc tcattatttt ttggctttca ttttctagct tttgcatttg  
186841 gatattttca ggtttgaaag taaaggtaat gcctgaaacc ttgccaccac gccccctccc  
186901 ttttgctttt tctttttcat aggcaagatt tttaaaaggc actctaattt gatcgaagag  
186961 atcgcgttct ttagaaagct cttttatggc aggtttttaa atccatttat cgatttctact  
187021 ttgcctataa tcttgcggtg tatccataat cctgcaaaaa tcttcccact caaatcgtgc  
187081 tttgcctgtg gttctaaatt gctttaaaag tctataaaga gtttttagtat atttaccatt  
187141 aaggctcaca aactcgctaa gttcaaaggc tgtaaaatta gcgcttagtt gatttaaaat  
187201 gtattcaaat tgcggattaa cttgtatttt tgtactctct aaatcttttg agcttgcata  
187261 aacataaatt gcaaatctg taaaaagggt tattgttctg tgtgttggtta cttctttttc  
187321 tcctctagtt gttttttcga ttattgtaaa atcagcttta aaaaactttt ctcttaaggg  
187381 taatgaaaat tctaataaac tctcattgggt ataactcatt ttaagaatgc ttcttaaatc  
187441 actaggataa aatgttactt ttttttctt ctttaagttt taccattaaa ccacataata  
187501 aatcctgttc tatctcatta aagctagata taggtattgt caatattatt caccctctta  
187561 atagtttaga ttccccgctt tttttaatag catctctatc ccctataata taagcgtttg  
187621 aaagttccct aaaaatataa aaaataaaaa atcgcgtacg cgcgagagaa aacaaaaaag  
187681 ttgagtaatt tttttcaatg ttttaagcaa tttttgtttt tttctgttat ttgatattaa  
187741 attagttttt tactttttata attttttata tatcagaatt ttaatcatag aaaggattaa  
187801 aatgaaaaaa attatcttag gtttagcagt tattgcttca ttatctagcc ttgccttagc  
187861 aaaaattact gtatcacaac agcctatagt ttaaccacat tatgaagggt gtatttttagt  
187921 ttatcaatgg gagagattat agcaaatgca ataactaaga taatattaat tatgaacttt  
187981 gcaactaag aggagagtat aaatgatact tgtaacacc tgtgggtggt tagacaccac  
188041 taattttggc aaaagtgaag taaataggca aactatagat tttcttttaa aatttcaaga  
188101 aaaaaaagag aaagtagaag ctgaagctaa aaaagaagaa caaagtaatt ctacaataac  
188161 agataaagca gacaataaaa aagatcagct tttagatata tccgtttaat tcttagcatt  
188221 agggtgagag cttgtcgttc gctcgtttta aacgagcttc gtgcccctga ctctacttat  
188281 aacaaatcat agcacctatt taggtgcaat ttgctaaagc taattaaata gtgttattct  
188341 taaaaaaggg taaaatatcg attttagggc tttttttata ataaatcatc ttcttatatt  
188401 tttcattata ggttattttt gctaaagtta gttttattac aatagaatta cctaaattta  
188461 tctataatga cttggagtag taaggcagga attgctatac aaatgcaaag ttttatcgtc  
188521 aaagctctaa aataaggacg ctaaaaaata acttgcaaac aagaaaatat ttatgcaggt  
188581 tgcttttttag gattgcaatg agcgggtggca atttttggca tattctacaa atcccttttc  
188641 tttatattcg gcaatgattt catcagcact taacttttaa gcactttgtt ttatcatggc  
188701 gataatatct aattcattca tgtaaatact ctctatcgca tgattactta taacagattt  
188761 tataccttca taatcttctt tttttacatc atctttatat tttttaagta ttgcaaggct  
188821 ttcttctaag ctatgcactt ctggatattg tttttgcatt tttgaatttt tccttttttg  
188881 gtgtttcaaa agctaataaa atcaaaaaat catttattga ttttagttga tttttattag  
188941 cggggttaag gttgcaccc cttacaagct cgatacttgg cacaagtggc ggataacttg  
189001 tatcctttta aaaataacat tgtagcatat ttttaagatt aagcagatat atctaaaaat  
189061 ttgtttattt attttacttt tagcaaaatt tacgatgtcc ataacaccac aaggcgttac  
189121 aagtatcatt tatactctcc tattgataaa ctaaaacaca accttcgtaa catagttgaa  
189181 ttatagtaag tttcatattg ttttaaaaaag gcggtaaaaa gttttaacaa gatataaatt  
189241 cttcaagctc aaaaactgtg aaattaacac caaatagata aaacaagggt ttcttttata

189301 tagtatat ttttagtgat  
189361 attttataca attgcatcaa aggaaatata tcaatgactc tcaatgaatt aaaagatgga  
189421 caaagtgcga ttataaaaaga aattaaagct tataaagaac ttcattctag gcttttaagt  
189481 tttggtttta tgaaaaataa aacattaanaa aaagtacact cttctttaa aaatgcaacc  
189541 attatggtgg aatttgaaag cacttgctgt attttaagat caaatgaagc tgaactata  
189601 caagtggaac cttatgaaa aaaattacta ttgactagc aggacaacc aatggtggca  
189661 aaagcctact tatcaatacg ctttgcaagg ctaatatgaa agtaggaaat ttagcggag  
189721 ttaccgtaga aaaagccgta gcgaaaacac gctataaagg ttatgaactt gaatttatag  
189781 acttgccctgg gacttattct ttagatgggt atagcgaaga agaaaaaatc gctcgtcatt  
189841 ttctagaaag taaaaattac gatatacatag tcaatgtttt agatgctaca aatttagaac  
189901 gcaatcttat tcttagtgca gaacttttaa gtcttaataa aaaaatgctt cttgctctaa  
189961 atatgtgcga tgaggctaaa aaagaaggca tagagcttga tacttcaatt ttaagcaag  
190021 aatttcaaat caatgttgtt gaaatctcag ctaaaaacaaa acaaaattta gaactcttac  
190081 ttgaaaaaat cattattttg ttcgaaaata aatttacacc caaatcaaga ttttccactc  
190141 cgctttgcga aaaaagctta gaaaaagaag atatactaac ctagtgaat gagctttcaa  
190201 gaaaagttat tacttataaa aaagaagaaa gaaatcttac taaaaaatt gatgcattac  
190261 tcattcataa gttttttggc ttacctatat ttttattttt aatgtggctt ttatttcagc  
190321 tcacttttac cttaggacaa attcctatgg attacataga atcaggcttt aatgccttag  
190381 gtgagtgggt taaaaacaat atccataaca cttcatcgc gtcagcttta gctgatggag  
190441 ctattgcagg tgttgagct gtatgcttt ttttgctaa tatcattatt ttatttttag  
190501 gcattgctct ttagaaaact acaggctata tgtcaagagt ggctttctta ttagatggaa  
190561 ttttgcataa atttggttta catggaaaaa gcttcattcc gctcatcact ggttttggct  
190621 gctctgtgcc tgcttttatg gctacacgca cgcttaaaaa taaaagagat agacttttaa  
190681 cactttttgt catcaacttt atgagttgtg gggcaagact tcctgtttat gtattattta  
190741 ttgggtgcatt tttccaagc gaagaagcgg gaaattatct ttttggatt tatcttctag  
190801 gtgctat tttt aggacttatt gcagccaaa tcttaagaac aactgcattt cgtggcattg  
190861 atgaacctt tgtaatggaa atgccaaaat accgtatgcc aaattggcat ttagtatggt  
190921 ttatggtatt taataaagct aaaatgtatc ttaaaaaagc agggacctt atactttag  
190981 cttccttgct tatatggttt gcgagcaatt ttcaaaca tgaaagcaat ttagatgatt  
191041 ttagtgctca agaaagagct gttgagcaaa gttatctagg gcaatttggc aaaacaattg  
191101 agcctat tttt ttctccgctt gagcttgatt ggaaattaag cgtatcctta gtcagtgggt  
191161 tggccgcaaa agaagtaatg atttctacca tgggggtgct ttattctctt ggaaaagaag  
191221 tggatgaaac aagcagtgat ttaaaaggca ttatcgctaa gaatatccct ttgcctagt  
191281 cggtggctta tttttat gtaatgattt acaatccttg ctttgctgca accatagtct  
191341 tttcaaaaaga aagcgaaaa ataaaatata ctttttctt ttttctttt acttgtatca  
191401 gcgcttatat agtagctttt atagggttaa atattacaaa atttgtaatc aattaaccg  
191461 cttttgtttt attaaagtct attacacttt tgatattttt ctcaaaagcc ttcaaacac  
191521 tataagcaag ggcttcaaaa tcaagccctc cgcatagata aatcaaaggc atacgaaaag  
191581 atttactcac atcaagtttt gatttttgct cattaagagt aagtttaaaa tcataaggac  
191641 ttgcatgctt aaagctgtaa ttttgcccg ctttaaaaaa gtcgttttta tcttgtaaaa  
191701 attcaccctt tgccaaaata aaattgatct caaaatactt ccaaatatca ctagaaggca  
191761 taggattttc atcaaaat tgcctataa aaataaagtt tttttcaaaa gatgtttat  
191821 agttttctac aagcaaagcg cctaatttat ttttagcgat attttgcaag ataagcttta  
191881 aattgctttc aaattcaaaa tccatcaaag acaagatttg gatttgctct tctagagcaa  
191941 attctgtgct aaattcctga tttataagct tagcataaga aaaaggattt gccatagggt  
192001 tttcataatt tccaaattca tcccaaaaat tcttttcgct acaagctata cagccatgct  
192061 ctgcagctac aggccaagaa gtttttagcgt taaattttac tttagggcaa ttattataag  
192121 tataaggacc tttacagcct attttaata aacaagctcc acttttggct ttttcatcat  
192181 caaatgttc tgcaaaaatt ccgctctcaa atttagcctt tctttcacac aaatcatgca  
192241 aacacttacc ataagcccaa acgggacgat tttgctcatc aagctcaggc aaaattccaa  
192301 ataaagcgaa ataagtcaaa gttacgatga tatttaccatc acttgaggga caacctggga  
192361 tattaactac tttttgggtt aaaacttctg aaataccaca agttttactt gggtttggat  
192421 aagcagcttg aattcccca taagaagaac aggttccac agcaaaaata gccttagctc  
192481 tagctgctaa tttttccaaa atttcataac cactctcacc ctctgcacct atggtaagaa

192541 aaaatgtatc aatagcagca acaccgcctt caaccgcaa aacaaaatct tctttcaaaa  
192601 catgctctaa aagttcttca gcttttgtcc cattggctgc cattaagtt tcatggtatt  
192661 ctaaagaaaa aaagtcaaaa accaactcat caaaacttgg caaatctgca cgcaataagc  
192721 tctcactaca acctgtacac tcacaaagat gtagccaaac aaccttggtc ttaggagcaa  
192781 gttcgaaaaa cttttgcgca agagctggaa tttcatttcc caagataaaa tgtttagcaa  
192841 gagcttttac gctttcttca ttgatagttt ttttatctac caagtctgaa ttttcgattt  
192901 tttcaatgcg ttttataagt atatctttta actcttcatt gctgagtttt gccattatta  
192961 tcctttttga ttatcccaac aaagcacagt atttccattt tcgtcttttg tgacatctcc  
193021 cattcccatg atattatctc ctgcatcaac ataatgcacc tcgcccgtaa caccacgagc  
193081 taaatcactg agtaagtaca tcgctgaatt tcccacatct tcaatgctta cattgctgtt  
193141 taacggagca ttgatttcat tgtattttta tatcattcta aaatcaccta ttccacttgc  
193201 tgctaaagtt ttaataggcc ctgccgaaat cgcatttaca cgaattcctt tgatacctaa  
193261 atctcttgcc aaataacgca cagagctttc aagagctgct tttgctacac ccataacatt  
193321 ataatgaggc acatatttta ccccgccaag ataacttaaa gttaaaattg caccattttc  
193381 ttttaataca ggtaatactg cacgcgttaa agaaagcaaa gaatacacag aagttcccat  
193441 agctatatca aaagcctctt ttgaagtctc taagaatgaa ttttctaaag cttcttttgg  
193501 tgcataagca acagcatgca ctataaaatc aatctctcct agatcttttt taattttttc  
193561 ggcaatagaa tctaaatggt cgttggttatt tacatcaagc tcataaacia agtttgatcc  
193621 aaattcttct gctataggct caacgcgctt ttttaatgca tcatttaaaa aagtaaaagc  
193681 taaacttgct cttgttcat agcaagactt tgctatacca taagctatag atttattatt  
193741 ggctacgcct actataaggc cttttttgcc tttcattatc atcatttatt ctttaattag  
193801 ttttataaaa ttttcagctt ttaacgcagc agatcctatt aaaacaccgc tgcaatgttt  
193861 tatattttaa atatctttga tattatcctc atttacactt ccgccataaa gcaaaggagc  
193921 ttgcgtaagc gaagaaagaa attcaagcac tttagcaata tcttcttttt ttgcacttac  
193981 gccacttctc atagagtaaa taggctcata agcaataatg agatttttat aatctaagtc  
194041 aataacttca agttgttttt ttaaaaaatc taaggtttga tttgaatttt taagctccaa  
194101 atcctcgcct atacaaaaaa tgattttata agcatgctct ttagcaaaat taaatttagc  
194161 tttgattaga ttttcatctc cttaaagctct tctttcagaa tgtcctatca aaacacattt  
194221 gattccaaat tcatccaaat gctcttttcc aagctcccct gtaaaagcac cattgatata  
194281 aggataaaaa ttttgtgccc cttgtataaa atttaattca ttttctaaaa aagctatact  
194341 aggcggaaaa acgatgatat catcgttttt tgcttctaaa tactgattta aaatatttgc  
194401 ataaagttta aaacttgatc ttgtgtgatt gcatttttaa tttgcagcaa atatcattgt  
194461 gctccccac ttcttaaaac ttttacacct ggcaattctt taccttcgat aagctcaagc  
194521 gaagcacctc cgcctgtaga aataaaagtc atttcatctg catctccagc acgcgcgaca  
194581 acatcagccg tatcgcacc ccctacaaca gtagtagcat gtccatcgct gatagcatgg  
194641 ctcatTTTTA tgctgccttt tgaaaattta tcgatctcaa aaacacccat aggccattc  
194701 caccaaatag tctgtgcatc agaaataacc tctttaaaaa gtctcacact tgcaggacct  
194761 atatctaagc ccatccagcc acttggaaat tcttgcgaag gtacaaattt cattggtgat  
194821 tcttgagagc aagcaggagc agcaactaca tccacaggta agtaaaattt aacgcctaaa  
194881 ttctttcctt tggtaagaat tttattggct tcttctaaaa gctcttcttc taaaagttaa  
194941 tttcctatat caaaccttg agccttttaa aaggtaaag ccataccgcc accgatgata  
195001 agtttatcaa cttttggaag taaatttgta agagcttgaa gctttccgct tacttttgat  
195061 ccaccacaaa cagcaacaaa aggacgcgca ggacgcttga taagattttc agcaaattca  
195121 atctcttttt gcagtaaaaa tcccgcacc ttatgatttt catcaaaaaa tttagtaata  
195181 gcctctacgc tagcatgcgc tctatgacat acccaaaaag catcattgat ataaacctcg  
195241 gccatagaag caagttcttt agctaaattt tcatcatttt tagtttcacc cttttcaaaa  
195301 cgcaaatTTT caagcattaa aatttcactt gcttttaaat ttgctgcttt gctttttgca  
195361 tcttcaccta taacatcttt agccataatc acttctttat ctaaaagcct tgctaaacgc  
195421 ttagctacag gctctaaaga atatttagaa ctaatctctt ttgggcgacc taaatgcgaa  
195481 gctaaaatca cactgcagcc attatctaaa caatatctta tcgtagggat agccgatctt  
195541 atgcttctat catcagtaat gtttaaaaaa tcatcttgag ggacattaaa atcacatctt  
195601 ataaaaactt ttttttggct tagatcaata tcttttatag aaataatatc actcattttt  
195661 aagccttatt tgcaatatat actgccatat ctactaggcg gcttgagtat cccactcat  
195721 tgtcatacca agcaacaact ttaacaaaaa catctgctat aacttgagtc aaatcactta

195781 ctacaactgc cccataagaa caagtgataa aatcgctcga tactctttca tcatcatcaa  
195841 ccattaaaat gccttttaaa tttgtagctg cagcttttct aaaggcttca ttaagctctt  
195901 ctttacttac ttttttacta agctgagcgg ttaaattccac acttgaaaca tcaataacag  
195961 gcacacgcat actttgtcca tgaagtttac cattaagttc aggcattaca agcttcatcg  
196021 cttttgctgc acctgtagaa gttggaatga tttttgagc agcagcacgc gagcggcgtt  
196081 tatctttagt ctttgcatca ataatgcttt gtccatttgt ataagcatgt atggttgtca  
196141 taagtccttt ttctatacca aaattatcct gtaaaacacg acaaacagga cctaagcagt  
196201 tagtcgtaca acttgcatta gagatgatat tttcaccttt ataattttgt gaatttacac  
196261 ctaaaacata agtaggagta ttatcttttg caggagcact catgatcact ttttgcactc  
196321 ccatatctaa aaacccttgg catttttcta ttgttaaag agctcctgta cactctagaa  
196381 caatttgtgc accatatttt gcaaaatcaa gctcttttat atcacgactt ttaaatacctt  
196441 tgattttttt accattgata attaaatcat ctcttcatt ttccacactg ctttcaaatt  
196501 ctccatgcac tgtgtcatat ttaaaaagat attttgtaag ttcaatatct gtagtatcat  
196561 ttatcgctac aagttcgata tcatctcgtt ttgaaataat tcttgctaca caccttccta  
196621 tgcgaccaa accatttata gcaactttta cagccatttt gtttcctttt gcgaagtttt  
196681 ttatgctaata attttactaa aaaaaggtta aaattttaat gaaaattgca ctttttggtg  
196741 gcagttttga cccaccgcat aaaggacatg acgctattgt caaagaagct ttagcaaaac  
196801 ttgatatcga taaactcatt attatgccta cttttatcaa tccttttaag aaaggatttt  
196861 ttgctgatga aaaacaaaga tttgcttggg taaataaact ttgggggaaa ctagaaaaag  
196921 tagaaatttg cgactttgaa accaagcaaa aacgccctgt accaagcatt gaaagtgtag  
196981 aatatcttta taaaatttac catcctagca aattttatct tctaactcggg gcagatcatt  
197041 tagaaaaact tcatctttgg catgatttta aaaaacttaa ttccttagta gaatttatca  
197101 tcgcaaactg caatgatata gaaattccaa aaaattttaa agatttaaaa accgatataa  
197161 aaatcgcttc atcttttata aggagtacc tagatacaca tgaagtttgc gatgaaatta  
197221 aagatgaagt gaaaaattac tatgaaaaat tacaacaaaa ctgatacaat ttcaaaaatt  
197281 taaaggaaaa aatgcaaga aagagtagat ttaatcgtta aaattttaga tgagaaaaaa  
197341 gctgaagaca taaaaacctt tgatatgagc gaacaagatt attttgtaaa atacgttatc  
197401 atcgagccta cttggggtga aaaacatgct ttatctttga tcgatgagct taagaccaa  
197461 ctcaaagcta aggggtgaaga atttttaaat atagaaagca gtgaagaatg gagtgtgatc  
197521 gatctaggtg atatacttat ccatctttta acacctgaac accgaggaat ttataatata  
197581 gaagaattat tagaaagtct taaaaaaatc aaggtataag tttaaaatgc aaaaaatgca  
197641 ctaaaaattt caaaaaataa ataaatttta tgatttttt gagctttcta atgagctttt  
197701 tgtcccccatt ataaagcaaa atatcgttta aatttcatag caaacttaat ggataattta  
197761 ttccgcccat gttttgagcg gtcatctctt cttttttggt ttaattatct tatttggttt  
197821 attttgggaa ttttttaaat ttttccttca aataggaatg attttaatcc cacttagagt  
197881 agtctttatc atccttgtgc ctttcatctt agaaaatttt tttaggcaaa actttttatt  
197941 ttttagaaaa tttttttgt ttggcatttg caattttact aatcgttgca attattatgc  
198001 catttttaga acgaatttcc aaaatatttt tctaaatct ctatgcgttt ttcaaggctt  
198061 ggatgtgtgg caaaaatacc atcaaaggct ttcaagaaaa acaagtacat gcaattttgt  
198121 ttaagttttt tatcataaaa gtggatcttt ggtgtatatt tttgctacac tcgcacaaac  
198181 aatgcgttat ataaatgaga aaaagctctt gttttcgtgc ttttctctaa atttacaaat  
198241 aaacctaaaa tacttattaa actgactctt taatatcgtt aaaaagtta aatactttag  
198301 tttcaagctc ttttgcttgc tctaaagagc ttgcttcaaa acgcgtgata agataaggac  
198361 tggatttggga tgcacgaagt aaagcccatc cgtaaccaa atcaatccta gccccatcga  
198421 tttcacaaag actcttcacc ctttctagcg caccctttc tatcgtttt ttaaattcat  
198481 ctacaagctt gaatttttct tcttcgctca ctggaatttt aatctcaggt gtagtataaa  
198541 gttttggtaa ggcgctaata atactctcta aatcaaagcc cttataaaca agctctaaag  
198601 ctcttaaaaa ggcataaatt ccatcgtcat atccaaaata tctgtgctta aagaaaatat  
198661 ggccgctcac ttcagctgct aaatcaatat ctttttctt catcatcttt ttgatatttg  
198721 aatgccctgt ttttccata aaaatagtac caaattttgc cacctcatca aaaagatttt  
198781 tagagcattt tacctcacct aaaattctag gattaggaat atttttcgca acaaaataac  
198841 aaagctcatc tccacaaaaa atatgagttt tacttaaagc caccattcta tctgcatcac  
198901 catcaaaagc aaatgctaaa agatattctt gattttcatt taaaaatttc tttatagcgt  
198961 gtaaattttt ttcttctgtg ggatcgggtt catggtttgg aaattgtcca tcaggatttg

199021 aaaacataac atgagctttt aaattttaaag cttttaccaa aggctctatc acaaccccag  
199081 cagctccatt ggagcagtcg attgcaaatt tataattaaa atccttttaa aaactaaatt  
199141 gctcacacat aaaattcaca taaagactta aaatatcgta tttttgagct tctaaatfff  
199201 cttcaatctc atcgtctaaa tgcttataaa cttcttttga aaattcttta agttcagccc  
199261 caaaaaaact ttctttacct atagtgattt taaaaccatt gtaatccttt ggattatgcg  
199321 aacctgtgat cataatattt gcatcaaatt tcataccctc ataaagacta aaatatccaa  
199381 gtggagtggg gacaagtcct atgttataaa cttgtatacc tgctttatta agcccgctga  
199441 ctagatattt ataaagctca tcagcactat atcttgcac ataaccaca cttacatttt  
199501 tacaaccttt tgcaagcatg gtttgcctca acaaaaaacc tatagcttta acactttttt  
199561 cgттаagttc cttaccataa agtccgcgta tatcatactc ctaaaaaatc acatctagca  
199621 tattttttcc ttaagtcttt ttaataaatt tcttttttat aatacaaaat ttggatagaa  
199681 aagaaaattt tgctacaatt ttacattaat ttcactaaat aaaggaaaaa ttaatggatg  
199741 aagaattaga aaataacgaa gaaaaaaaga aaaaaggcgg ctcgcttggt atcattatag  
199801 taattttact ttttgtctta cttcttagca tcatgggtgt aattgcatgg cttatctcaa  
199861 gtagctcaag cgatgaaagc gaagtcaaag cagctccaaa agaagaggta aaagtcgata  
199921 aagctaaagt tacagcaccg acacaacgcg ggagtgattt tgcaaatata gggcctatgt  
199981 atcctcttga tccttttact ttaaatttac ttagtgatag tggctcaaga tatgtaaaat  
200041 gcactataga actagagcaa aatacagagc ttttaaaacc cgaacttgat aaaaaagtag  
200101 cagtaattcg cgatatcatt atccatgctc taactgcaaa aacctttgag gaagttagca  
200161 caaaaaagg caaagaaaga ctcaaagatg aacttgttgg aaaaatcaat gaaattctca  
200221 ccgatggctt catcaaaaat gtttatttta ctgattttgt agtctcttaa tgcgtatagg  
200281 ttgcatataa gttgccattt ctaggataga tacaatctat caaaaacatg gcaacgcctt  
200341 tcttgataaa tttctaaacc aaaatgagca aaaattgata aaatctagct caactttagc  
200401 aggtttttgg gctgcaaaag aagcagcaag caaagctttg ggtgtaggaa tttcaaaaga  
200461 atgtggcttt ttggatatag aaattttaaa agatagcaaa aatgccctc atttaaaact  
200521 cgcttctcat gtattggaaa aatttaagat cacttccact tcccttagta tctcatatga  
200581 taatggtttt gctattgctg tagttgcttt ggattgattt tatcttttgc ctatagtttg  
200641 cttatctaaa tttcttgaaa gtataaaatc aacaacaggt tgctctcttt tattggctct  
200701 tttgcaatga tctttttgaa agaaatctgt gattttaatc actacttttg cccatttttt  
200761 tctatttctt tcgcgccacg catgcgaaga tacgctttcc caagcatagc cattaaacia  
200821 acttgcattht acaaaatgat ccaaggctct aacaccttgt cttgctctag ctgtattaaa  
200881 aaaagttcct actatcacta tgaacaaata tccacaaatt gctaaaggca ctatggcaca  
200941 aagcaagatt gtccctgcta atttttcttt taaactgcct tttaaattac gcttaatgcg  
201001 gttgcaaaaa ttggcacgaa ttcttgcttt gactcttttc atgactctct tttgctaaat  
201061 ttgatcctca ttccatttgc agagcgtatg gttaaagcgc ctacaacatc tggaaacgaaa  
201121 ccttcttcaa gttctaaatt atattttttc aaaatattag ccaaaattaa aatagcctct  
201181 tgcatcgcaa aaccttgacc tatgcaaatt ctttccccta ccccaaaagg taaataagca  
201241 tcctttttat actcaccttc aaaacgagag ggtttaaatt cgtgtggatt agtccaaaat  
201301 cttcatgtc tatgtatcag ccaaggtgct ataacaactc ctgaaccttt tttaatcatc  
201361 ttatctctta ctttagtatc tttttttgct tctcttgcaa aaaagcctac aggcggataa  
201421 agtcttaaag actctttaa aatattgggt aaatatttaa attgttttaa atgtgaaatt  
201481 tgtatatctt caccttgtaa aacttgaata atttctttat aagctttttc ttgttcatca  
201541 ggataaagac tgagtagata aagcgtccat gttaaagaac ttgctgtcgt tcatggcct  
201601 gctaagaaaa gcatagctac ttgatctaga atttcttcaa aagaaaaacg ctgattagtc  
201661 tgcgcatcca ccacaaaag caaagaacc aaaatatctt caaaatctc tacttttcca  
201721 ctacttaccg catcatatct tggctttata atactactta aagcttgcct gatcacatca  
201781 cctgctttag cacgcttacg gtcacccaac acataagaaa gccatttagg gaaacgaaac  
201841 atacgacgca tagctgtatg tacactttgc tcttgaaaag tcacaaaagc atctaggatt  
201901 ttttttctt gctcttcatc taatttagaa gacatgatgg tgcgaaaaat aacatcagca  
201961 gtaacaaaag tcatagcctc atccacttcg ataatagaag cattaggata tttttcaaaa  
202021 cgcttcatca tatcgcttac tgcttcttc atgagattga aaaccttga aatacagctc  
202081 atttcaaaac ttgggcgtaa aagttcgcgt tgctttttcc aaacttcacc atttgttgta  
202141 aatatgctct ctccaaaag agggctttaa agttcgtgca aaaatgcact ttttgaaat  
202201 tctttaacct catcaacct cattcttttg acttcttttag tatcgttgat cacataaaga



202261 tcaaaatttg gcatttttac ataacctggt tgcattttat agctacgctc ataaagacca  
202321 tcaagccatg atctgcgttt tagtaaaaag gttaaaagtg ttgaagcttt atttttataa  
202381 ggtttgggaa aaaacggaca ttgactcata tttttacctt ttcttctaaa aatttaggtg  
202441 ctacaataaa agcaaaaaaa tcataacttc ctttaatatg aggactataa agatataaaa  
202501 aatgtgcttt atttttatct cttttaattht ttttatattc atttttttca tacaaggat  
202561 gaaatttagc acttaaaaat ggcgaggtaa agtttagcttt taccocgctt gtacggaaaa  
202621 aatccacttg tggaaaacac gctccatcga ttattgaagt ataatacaca cattttaaat  
202681 caaatgcaga aacaaattca agtttttttc taaaaccatc cgaatttttt tgatagcttg  
202741 ttaaaggaat gcattctcct aatgtaagaa tttttaattht atccaatact tttttatcta  
202801 aattttgtht taaaatatgc tctaaaactt ctatacaaac tatagttcca acactatgag  
202861 cgacccaaat gagttcgtaa tcttgcttgt tttcattttg ctttaaaaaat tttaaaaattht  
202921 catctgcaaa aagctthtatt ctttgctcca tagcacccaa tcttttttct tttcaagtag  
202981 cacaaaaagc acatatcctt gctatccaaa atacggccaa ttttctacct agcttgaata  
203041 aaaaacgatt gagtaaaaat cctagaacta tacctataac aatagccaaa aaagaaggga  
203101 tataatcttg caaaaaaaca aaacttccca aagctaagcc taaagacaat aacaaagaaa  
203161 aaataacata aaaaaaagga taataaccg taacaagctg ataaatcgat tctttacca  
203221 atttaagaaa aaggcctgtg atggataaaa ttctaaaaaa actataacaa tccatcaaag  
203281 catctttgta gctttgagac cagttttttt taactatact attccaagtt aaaaaatgat  
203341 agcgcgtttg agtgttttcg caatttatct taaaaaatgg aaagttcca tttttttcaa  
203401 taccacccat ctttgcttta agatcaaatc tatgagagta atctttttaa ttcttcttaa  
203461 ataaatcata ataaaatcta tagctcttag gatcatagcc cgctatataa aatacttctc  
203521 tatccataaa aatacatttt ctttttttca aggattataa cattttgtht taaaagctgt  
203581 cttaatcgga gttttatcga cttaaaaaag aatttttgta aaaattgcca ttgaattgat  
203641 ttgtatttaa aagatagtht ttgaaattha aaaccaagtt aggattgggt ttgtaagcat  
203701 gagcttcgag caaaaaaat tggagcttht taggataagc taagccttca aaatcataaa  
203761 aagcattgcc acaaacctta gtaggacagc cctccaaaat agcgccttaa cccacagtgg  
203821 aattaatcgt gatacaacct aaagcccttht ttaaaagagt aggcaagtaa gtatcatgca  
203881 catataaaat tcttccttct acatgggtatt tttgacttag ctcatthata agtttagaat  
203941 aatttctata tcccctatcc ataggatgat gtttaaaaac aagataagac tttgctcttg  
204001 cgtgatttgc aaaagaaagg atggtttctt ctataaattc ttctatgtht tttttataat  
204061 ggtgcttaat ttgcgtatca ttataaactt gtaaaaatagc caaaaaatac tttttttcaa  
204121 ggctataaat tttttgattg agtttttttt ctgtgaattht ataaaggat tttctgtata  
204181 aagaactaaa ccaaaataaa aattcaaaag gatataaggt gcatgatga agcttgttgt  
204241 taaaaaagg agctagcaga aaagaaaaaa gccaatataa aaaagcacta aaggccataa  
204301 atttaaaacc acctggaatt tcttttatgc tttcttttgt agaaatattg caagaaagat  
204361 agaaatttht atcgcgaggc aaggaggagt ttgcattgac cccatcttht tcaaaagtga  
204421 tacaataagg ctttaaacac cctcttcaa aaatccaaat accaatgcca agctccttag  
204481 ctactttgat agcttttgca tggatcaaac ggcaatcatt atacatcaca atagcatcta  
204541 tctttttttc tttaaaaaag ttctcataaa aattttcaag atccttttcg tcgcacttgc  
204601 acctttttcc acttggatag aaaagaaaat cccctcgtt aaaatthaagc ttaaaaactt  
204661 tggthttatt tttttcatc tttatagcaa ggcggtgaaa aaaagtacc acaggtcctt  
204721 gtaaaagcaa gacattthta ccgctaaatt cttttthtatt ctatctcta aatttcatct  
204781 ttttataaaa acttcacata ttcttcttat ctttctaagc attaaaattc taaaatcaat  
204841 taaaattctt agccatcttht ttgaaaaata atctttttgc aaagctaaca ttatatcaa  
204901 agcaagctca acttcacata aatttttact ctttgatga atatatcttg gataaaggat  
204961 caaaactcct gccacaagct cttctaaact aagcactctt gtgcgtcttg agatatgatg  
205021 taaatcttga gtcaaaccac agcccgcata aaaaggcttht ccataaacca ctactttctt  
205081 acctcgtaaa agtgcataca aaccgctagt agaagtgatg gtatgtactt catcgcatgc  
205141 atttatggcg ctgtctatgc tgacatttht tatgatctcg tcgcagtatt ttaaaatgat  
205201 atccttatct tttaaacctt tgcgatttcc acttaaaaca tcaggatgag gcttaaaaac  
205261 gataaaggcg tctttatttg cagctcttac gctttgtaaa agcttthaagg tgtcaaaacc  
205321 tgctccacct aagatcatcg aagcatcatc ttctacttga gcggggatga gaatgatttht  
205381 tttatttgta ttaaagtcaa gtttttcatg ctttaggccg ttgtacttht aaaatttght  
205441 ttgtgttata gtgatgatga gctttttggc tctttgtctt aaagtatcat caaattcatg

205501 attttgcaaa acctcttcta aatcgctagg gtgattagga tctacataca aacccttgct  
205561 atctactatc aaagaaaaag ggcgtgtaag gtctgaacct aaaaaaacg agcgcaaaaa  
205621 gccatcttct actaaaaaaa tttcattttt aaaatcttta gtcagcaaaag ctttatcata  
205681 ctttttacc ccaatgaaga ttttatcttc ggaatttaaa ttcgctttgt aaagttcatt  
205741 aagtgagttt aaaaaataa ttttattggt tttggccttg aaaaatggct tcataaacca  
205801 acgcttccat aaagtaaagc ctaaaaaata taaagtatga gaatttactt gctctatctt  
205861 tttatatctt gctagggtaa aaatggtatc aaaaatatca cttttttgat tcaaataagg  
205921 attaaaatac tcgctgtata ggatataagc agcacaaaaa acctcttcta aagatctttt  
205981 ttttaaccctt cttttacact cttagcttctc ttgagttagc ccccatcctg cataaaaagg  
206041 catacataa catacacatt cacatcctag catcaaagct tcaaaacca tgcccgaagt  
206101 cttagtataa acttttttaa aatggcttaa taattctatg ggattataat tttcttttaa  
206161 aatcacgcat ctactgggta aatcttgcac gctaaaatca ctttgttttt taccacttag  
206221 cacatcagga tggattttga tatatatatt agcatttgga ttttctttta gggcgctcatt  
206281 tatgatctct tgggtcgaaa aatcacttgc taaaccaaact cgaagtgaag cgtcatttgc  
206341 cacttgagtg ataattaaaa cgcgctcttc gttggcgctg aaaagctctt ggggtatgca  
206401 aagattgtta ttatacttgc tgagtttttc ttttttgata agctctatgg ctttttttgc  
206461 ccaagctagc tctttggggc taaactcata ggtattttaa atattttcaa gccttgaagg  
206521 agtgctcgca tcataataaa tccccacatc atctttaact atagaaaaac tcggactatt  
206581 ttctatgcct aaatttaatg agcgtaaaaa accatcttct aaaagcataa atttagcatg  
206641 atgttttttg gctagagcta tagctttcaa gcctgaattt ttcctgcccc agcctacaaa  
206701 aacatcttct ttatctatgc ttttataggc cttatacaag actatcttgt aaaaatcttt  
206761 aacatttttt ataagttttt ttgaagtggg gtgaaatttc ataaatctct ctttaaatta  
206821 aaaagagatt atatcattta tttcttttta aattccttct ttagcttctt aatctcaagc  
206881 aataatttga tatacccccc cccataccaa ttattacttg cttttataag ggcctctctt  
206941 agcttatagg tcaaacactc ttttctttt aaagcttctt tataatcagg gtaagattct  
207001 aaaggggta aagctaaatt tggatttttc tttattttta atttataagc tttttgggct  
207061 tgtttgtgcg aaattattat atttaataat atcatgggca ttattaataa acctagtaaa  
207121 gattttgaat ttattatcat ggcttgacct agtttataag agagttgggt ttgaatgcgg  
207181 gatttggcca ttccatattt agcttggaaa ataatttgat tttttgaat ttggataact  
207241 tcttctttat tttttattat ttgattttaga ttttgaattt gaatttggat aacttcttct  
207301 ttatttttta ttatttgatt tagattttga atttgaattt gaatttgttc attcatttta  
207361 ttttttctt gaatgatggc gtttagattt tctatcttct tttcattttt ctttagaaat  
207421 gtaataaaaa aatcagaagg tagcttagga aaaatattta aaggatcaca atataaatca  
207481 aaaatattta aacacaccgc tttatatata ggcaaaaatc ttttcttaa aatttcaaaa  
207541 aaaatatctt ttttatacat attaaaaaac aagtcgagtt ctttataaat gagacaataa  
207601 ctataatatt tattatattt aaaaatttgt tctttattta aattgcaatt taataaaaca  
207661 ctcaagtaac taggaataca cggttcattt gaaccggaat gattacaagt actattactg  
207721 cgcactctat atatataaac tttcctataa tatatatata ttagctttga caaagcaaat  
207781 aagacaatgc caaaatggtg atcttctgtg ataattccat tgataaattt taattttatt  
207841 tcctttagat atggaaatct tatcatacca tgccaaccaa accaaaacaa tcctgcttga  
207901 gaatttaaaa taatatcttt ccactcactt gagttaatta tacattcttt actaatatat  
207961 gcatattcaa acatagattt atatggcata tctggcttaa actcattata taaaattta  
208021 taatcaaac aaaccacctc taccatcc attctaggta cacattcttc tatgcagttt  
208081 aattcccagt aatcatcaga atctaaaaag ataataaat caataatagg ataagtaaat  
208141 tttgttaaact ctttttcatc attaaaagct ttatagcttt tatatacagt gtatatttca  
208201 taaggattat taccttctat gttaaattct attaaagaat tttctttgat gctttgggtt  
208261 ttatttttga gtttgattc tccactaaag tattctatgc ccacatttct agctgtactt  
208321 tgaccacat tttttttatc aaaaagagta attcttttat cttttaaagt atattctttt  
208381 gctatgttta atgagttttc atctgtgcta ccatcattta caagtatgat ttctaagttt  
208441 gtataacttt gattgataac actatctaag catttcttta aatattttt tacattatag  
208501 ataggatta ctacaccgac ggttttcata tattacctt aggtttattt cttaaaattc  
208561 attctaaaaa ttcttttatt tctctatgcc aaacaatatt tttttttaat attctagcag  
208621 gaattcctcc tataatacaa ttatttgggg gcttttggt aaaaaatgaa aataatttct  
208681 taggaaaaga aacaactaga gccttagtag ctattacaca ttcctcgcct atataagaat

208741 gatttaatat ttttacatca tcacatatcc aacaatgttt acctataact atatttccag  
208801 cgtaatttaa tctttttttt gtttctttgt taaaaaact atgattgtct gaagttgcaa  
208861 gtgttatatc tgatgcaaac aagcaatcat tgccaatc ataatgctgta ttcatttctc  
208921 cacacaataa cgaaatattt ccaccattaa aaaaacaatt atcacctata actattttac  
208981 atttatctga caaagctcca ataccacctt tgaatattat acaattgagt gttcgattta  
209041 catatacatt ttttccaatt ttaatttcat tattatttcc atttatatta ataaatacc  
209101 cccccctta tttttattta tttttaagtc ttttgaata taaactttat tattgtttcc  
209161 aaaaatagag atatttaaat tgcatattga tggtagatag tctatgccat atatttcatt  
209221 attgacacca caaattttaa tttttgcaa tctttcgtca ttatttttta tcaccataat  
209281 caacttcctt attagaaaaa tttttagaat aagcaatatt ttattaaata attttataat  
209341 ttcaattatt atcctaactt ctttattaaa aaatctttaa aaaatacata tggatttctc  
209401 attagctttt tgaactttcg attgaaaatc tcttgcttac tctcaacttt tttagcaatt  
209461 tccaaagatt ttatcacagg ctctcctttt gtgaaaaatt cttttttatt atcagcattt  
209521 aacgaaaata cagatgcttt atcacagtag ctaatgctat acattttttt acttatgccca  
209581 aaatctctat atatatattc tatagtattg cagtaattct cctgaaaact atttaaagag  
209641 agacattttt tatataaatt aagattatca ttttgcaatt tttttatttt ctctctcgaa  
209701 aactgagaaa acaataaaat attatcagca aatttatcaa tatcttcaac agaggaataa  
209761 agcactccac tagttttatt ctccaaccaa cgatatccac ctacataaga gcatattatt  
209821 ggttttccaa atgctaaaaa ttcaatcata cttaaataca ataaactacc tctatttgga  
209881 cataaacaag catcggctat attgatatat tcttgtgggt tatcagtaaa tggatattgt  
209941 atccattggt ttgaattaat tggcacaaca tgcttctcgc caacaactat aaagtaaatt  
210001 ttatcatttt tgctaataat ttgttttgca gcatcaatta aaatatcata acctcttaca  
210061 tctataaacc ttccaaggta aagaaatc ttagcatctt ttggaatatt taaactttct  
210121 tttaaaaatt tcttatcatc tgcgggtttg tttatagctg tacctgtagg acaaaaaata  
210181 ataggtttat tttttatcaa agaagcaaac tctggccata atttataata tccttctaaa  
210241 ctttcctcgg taggaaaaaa caagcaatct gcaagcttaa aagcccattt atctctttcg  
210301 ttaaaataat aataaaacat ttctttatca tcatctcgc atttcatatt tctgcaagtg  
210361 agatacatat cttccatagt tggctgatat ggattatgtg ttgtaagaat ttttactact  
210421 cttgaatcca cgcctaactt aattaaagaa ttatatattg gcaaaaaatt ataagctcca  
210481 tggatatgta tagaagctat attttttggga tctattttga catattctga aaatgggatg  
210541 atttctctaa accaatcttg tctttttgtt aataaatttt ttgaaacagt tttaatatga  
210601 tagttttgtg tatacttaaa tctttgctca actatgattt ccaatatatc atttgggata  
210661 tattggtcag taggaatc aggaaacaga aaagaacatt ttgtcttttt gtctgtcaaa  
210721 aaagaatcat tatatcttct aaatgcttca cataaggaag atatatatcc aacacttccg  
210781 ctttttttta aatcaaatgc ttgatggcaa tgaatgtagt gctttaacat gttttacctt  
210841 atttttttta taataaaatc tttaaagaac ctttttggat ttttaatgag ttttttaatt  
210901 tttcttttta taggatttat attatccacg gtatttacia tttgcttctg aaaactaata  
210961 aatgaacgca ataataattt atcttgcaca gaaaaaaca cttcataatt accattgtgc  
211021 tgacttaatg ttgcattgga actgaagtta tttttttta ttgtttttta aggtatttta  
211081 atttcttctt tacaatttg cattatatag ttttttatt taatctcatt taaatttaaa  
211141 aaattttctt ctataatact gatttcagat tgttgattat ttatcctttt aacctgaaaa  
211201 tcaccaagtc tagtccaaaa tatttttaata gaagtggcat gtaaaatttc taaaatctgc  
211261 aataaaaaaa acagttgctt attattgcct attaaatgta ttgatgatgt atttttaaaa  
211321 tcaattaaca ttaactgttt taaagaata ggtaaagcat cgcctttttt caaatcaact  
211381 atactagaaa tatctataat ttctttatca taaaattgaa ttcctatggg acttaagag  
211441 tggaaaacat aatcttgcgt ataaataacc ttaacattta ttttttttt taaaacttgt  
211501 agatctttta acttaatata atgcaattca tccgatggaa gtataatata atgatttaac  
211561 attgttttaa ttccttatta atttgttgaa gtatttttgc tcttttattc cagttgtgaa  
211621 atggtaatat ttttccactg cttggatctc cattataata atgagaaatt ccttgagatt  
211681 gttcttctaa agaaaatcca tagtaagcaa aatcttttaa tctttctctg tgctttaaaa  
211741 gataacaaag catcacataa ccatgagata aagttcttag ttgcgttctc ttaataaatt  
211801 ctaatgtctg tatttgaaaa aaaggtaaat ccaaaagcat tatcttataa atactacttc  
211861 tttcaaattg agaagtataa aaacttgaat cattggatat cataaaatca aattgggata  
211921 aatcttttgt tgttattggt tcaagagccg gagataaccg ccatacattg gttttggaac

211981 cataatcttt ttcaaaacca tttgtttttat aattatttaa acgtataaca atatcataat  
212041 tatctataac gcaaccctta tttttattta actcacaagg agagtttcca acaacacaaa  
212101 tagttttatt ctctatgtaa ctcaaaaatc tttcttcaga ttgattaaaa taatctttaa  
212161 tttctttaca taaatccggt tgagatttta aattagcttt gattgcactt ctattataaa  
212221 accaatcaag aatttgagca ccatcttctc ttaatcgtgg aactgggatt gttatttctt  
212281 caatactggt gtttaacaat actgaaatat atgctactaa cttaggaaat ttattaatca  
212341 aatatattgc attataacta tttaatagct tcaaacatac ttctttgatt tgttctcctg  
212401 ggtctgcat aggaatattt ataaaataac ttaattcca ttctaaagtc tttaaaatat  
212461 taaaagaaaa attctcattt tgagcaata ataattttaa gcccatatat gaaataattt  
212521 cattataact tgcttggagt gaaaaattct gtattgtagg tagtgaataa taattaactg  
212581 gatttaaact tacttcacga atcaatactt tatcaacatt aaaaccatta ttttttaaaa  
212641 aatttttcga ataaagttgc aatatcacat catcacataa aacagtctct atataatttt  
212701 taattttttc agcggtatct aaagcattac aagcaataga aatttgatac ctacctatta  
212761 gatgagcaac agcaaaacct aaaacatatg ctttatcaag taaaagtttg ttttcattag  
212821 aaattaaaaa ttctacaaga tcttttatag caggtataat atcaacaaat ctacttggat  
212881 tagctactga ttgctctgct cttcctctta aataataata ctttgctccc ataacataac  
212941 gaattttttt acatatagaa aaaacctttg ctacaaaagg aacatcttga taaactttac  
213001 aagtttctgg taaagtaatt tggttatcca ataaaaaat ttttctataa atagctgcat  
213061 aatagcagt tccacaactt aaaaagcgat tttttaattc ctcggtactt aaaacacaat  
213121 ttaattttac actagtatat gtagttattg ctaaatgacc aaaataaggg cgattttcga  
213181 tatatccatt gtataagaca acatccatat tctcatcttt tgcaatttta tataaaattt  
213241 cataatacat ttcatctaca taatcatcag gttcgcataat agctatataat tctcctttag  
213301 catgataaat tcctaaattt acagcactac catatccacc attttccttg caatagtact  
213361 gaatgctact gattttattt ttttttataa aatcttctat tacaagatgc gtaccatctg  
213421 tagaaccatc attaataata atgatctcta tctcttctaa tgtttgtttg cataaagact  
213481 gcaaacactt gccacataa tctgctacat tataacaagg aactataatc gaaacgccta  
213541 tttgattcat attcctaact tttagtttaa atttaatata acaaaacact atttggaatg  
213601 gtatagttaa tgctaaaaaa taattatttt tcaatccaa taaaattttt ccgattttat  
213661 agcttaaag ttctttgtac gattgacctt cataatagtc gcaatatttt ttttcagat  
213721 tgccatttgg tttagtggta ttagtattga tcaatctaaa taattctaca aaatccttac  
213781 ggctcttgca aataatagcc tgtttaccta ttttatattc tgggtgattt tccataaact  
213841 caatagcacc ttttttatat ctagctactt cattataaaa ttttttagga ttagacataa  
213901 tctcttgaag ttgttctatc tcccattttt taaataaaga gaaactattt tcaactaatg  
213961 tttttaatct tttaaaatct ttctgaaatt tatacaaaaa ttccaaccta taactcgagt  
214021 gaattcgata aagattccaa cgatatccac gatattctta ataatgaact atacgcaaaa  
214081 tatcataaaa tttatttttc aatacaaaat gttctataaa atcgatttct tcgcaaatatc  
214141 aatatatttt atctagacta ttacaagaag aattgatatt atcttgtcta taataataat  
214201 atgcttcttt cactaaaaaa atactgctag ctaaaacttg caattgaaac caaaagctag  
214261 tatcttgaaa agcagaacct ggagtttcat tgcacaatat attgtatttt tttataaaa  
214321 ccaatttata aattccacta ggatttataa tgtttgactc agttaaaatt ctcttatctg  
214381 ttttaaaatt taatatttta ttatatagaa cttctgtcca atttaacaac ctatattcat  
214441 aaactctttc ttctttgtcc caaaaattta acatatctc ttttaactata tcgcattttt  
214501 tttctatagc tatattatat aaattttcat acatattttc ttttatataa tcatcacttt  
214561 caactatgcc taaatactca ctttttgctt ctttgatgcc caaattcatc tgataaccat  
214621 agcttttttt atccgaaact atgactttta gtctttcatc gtttttctca tactctctaa  
214681 gcacttcaag agtaccatca gtggatccag catcaacgca aattatttcg atatctttta  
214741 aggtttgatt taatacacta tcaacacact cacaaatata tgttatagaa tttaaagatg  
214801 gtataattat agatatttta aaatttttca tatctaagtc ataattcttt tttagaaaat  
214861 tctaagcggg atttaacact atcctgcata tcatagtatt tatactcacc tagtcttcca  
214921 ccaaaataca cattggtttc ttttttggct agttctaaat atttttcata taatttttga  
214981 tttttatcat cattgatagg ataatacggg tctatatctt tagtccactc tagtggatat  
215041 tcttcactta ctactgtttt ttcttgcttt ccaaatcaa aatgtttatg ctcaatcgtt  
215101 cttgtatatg gagtttcttt atctgtgtaa tttaccacag ctacaccttg ataattatct  
215161 gtatttaaaa tcttatgctc aaatcttaag cttctatatt ctaaaggacc atactcataa

215221 ttataaaaag aatcaatagt tccagtaaaa atgatttttt ttgcttttatt ctgaaattct  
215281 tttttatgtt ttaaaaaatc aatattcaag agcacttcac aattttctaa cattttctca  
215341 aaaatagccg tgtatcccc tataggata cttgatatg ggtcattaaa ataattatta  
215401 tcataaatat atcttactgg gattcttcta ataatcgatg caggtaaatc cttacaatcc  
215461 cttccccact gcttttcagt atagccttta acaaatTTTT catatatatc tcttccaaca  
215521 aattttataa catgctcttc aagattccta gggatacctt gtatttcttg gctttgtttt  
215581 gttataatth ctctagcttc ctttggactg aaaatcccc ataatttact aaaggatttc  
215641 atattaaaag gtaaattata aatctctcct ttaaaattag ctatgggcga atttacaaaa  
215701 tgattaaatc tgcaaaattg ttgcatatat ttccatatat tttcatcaga tgttctgaaa  
215761 atatgcgcac cgtattttat aacattaata ttttcgatat tttcagtgtg gcagtttcca  
215821 cctatatgag atcttttttc taacactaga catttatagc ctttcttgct tgcttcataa  
215881 gcaaaaatac taccaaaaa tccggttcca actactaaat aatcatacat acaaaaagcc  
215941 tttttaatth ttaaaattaa aagtatagca aataattatt tataaaatat actttgaatt  
216001 aaaaatthtt taaaaaaatt ttttaatthtt attgcctthtt gataatctct ataaaattcc  
216061 aaaggcaatc ttttattthaa aacatctctt ttaatatctt ttttatactt tctcacttct  
216121 ttttgatgth gtacagatac ctttaacaaca ctaaaagcta atgttaatth cattatactt  
216181 ttttttctag aaatthctth tgcaatthta taagaaagat attctthcac tctgctaact  
216241 gcacctaagg gttgatthtt tatatatatt tttaaatthtt tggcatatth ttttagatac  
216301 aatggatctt tatcaaatth ttgtaaagth aaagctthtt tgcaaaactc tggtaaaaaa  
216361 tgctgtthaa tttcatcgtt taaatgatgc ttagaatgga taaatthttat aaattctagt  
216421 gcgatttgca tccagctthgt agtctcataa tacaatcttg tctcattcga atthttcaaaa  
216481 atatcaatct ttttcaaatg cgaatcagga tgtatcgccc atthttttacg ggtaaaattc  
216541 atagagcttg attctcgtaa acgataaatg tatatttgct ttggaaatat ataaatattt  
216601 ttactcaaag caaacaataa caccctcaaa tgacaatctt ccgcaaatat ccccttgata  
216661 aatthtagth ttatgthttt aagaaaagth aaatthacca taccttgcca agcaaaccaa  
216721 aaataaaaaa gtctthctth ctttagctcga tcaagccatt cthttgagth gataatcact  
216781 tcattthttat aatcaaatg agtcatthgg ctaagatgth ttctthttgac tttatcatac  
216841 accgctctat aatcaaacca aaccacctct accccatcca ttctaggtac acattcttct  
216901 atgcagthta attcccagth atcatcagaa tctaaaaaga taatataatc aataatagga  
216961 taagtaaatth ttgttaaatc tttttcatca ttaaaagctt tatagctthtt atatacagtg  
217021 tatatthcat aaggattatt accttctatg ttaaatthcta ttaaagaatth ttctthgatg  
217081 cthttgggthtt taththttgag thttgtatthct ccactaaagth attctatgcc cacattthcta  
217141 gctgtactth gaccaccatt thththttatca aaaagagthaa thctthttatc ththaaagth  
217201 tathctthttg ctatgththaa tgagththtca tctgtgctac catcattthac aagtatgatt  
217261 tctaagthttg tataactthtt attgataaca ctatctaagc attctctthaa ataththttct  
217321 acattgthaga tggggattac tacaccgacg gthtttagthtt gcattgthttat gtctthttata  
217381 aaatthtagaa tctthtaaaaa aatccctagg atthaaaaat aatthttcttg ctaaacgata  
217441 aaatthtagtc tgcgaaatca aacttaataa gaaatthtaa ccaaaaaatt ctaaaatthtt  
217501 ggaaaaaaat ctcaccctth ttatctcata caaataaggc ttataaaca aagattthtaa  
217561 agaataatac tctthgtcat aatthcccaa cataagcatt ththttcttat caaaaaataat  
217621 ttgataaaaa ccatcattth tagcaaaact ataaagctca thththtaaat aaaaaacaat  
217681 thttatacaaa tcatcatctt tactaaatcc taatthctgg ataaaaagthaa gaatthttctt  
217741 ththttcttca aatthcaaaag aagtgatgth agctthgcatt tctthtaatth gtaatthtatc  
217801 taaatcaata tccaatacc thctatcata aagctcattg gtatctthttat aaaacaacca  
217861 agaatcaggt aaaattccaa gctcaaaata cacacaaaga tagthththta aaatthctgtg  
217921 caaatcttg ttgtatatat ththtatctag taaatththta tcgaatthttt cthctthgtaa  
217981 ataaatthtca atthctththtt ththttgata agcaagctca tctaagcttht tataaacgaa  
218041 cthgccthaaa taaacgctca aagctcthaaa attataththtt thattthgcaa taacthaaat  
218101 thttagthattth thttacacttg aaatthgcaa aggatctata gaataatctt thattththtt  
218161 caagthgtthg taaaataact tatgaththtt atgctththta tccatataac cattthtgatt  
218221 tggctctata tgccaaagat ggtacatata aatthcataa aaacatagct cataaccaag  
218281 taaagaaaaac caagaacgaa aacctthhaa gctataaaaa thccaatthc tagaatcata  
218341 atthhaattht aaaggcacct tctcaaattht taaacaagag ththhaaactc tagcaaaaag  
218401 atcaaaatct tcatagccat gacctataaa atthttcatta thttccgcaa thttcaaaaa

218461 tttatgtcga ttgataatca aactcgaagt cgaacttgga gcaaaaaact taacaagaaa  
218521 attttttcca ctgatcaaat cttcttgaat taatacatcc cataaatcca ttgggtattc  
218581 ttttaaaatt tcactagcct cttgctgtaa atatactacg ggcaatacta aaagagcatt  
218641 gggattgttt aagatatttt tgatttttat aagttttaaa attttttcaa gactatcaaa  
218701 agaaataaaa caatcaagat ctaaaaaata aagtacacta gcattagcat aactagcacc  
218761 aaaatttcga catttgcctt gagaaaaata ctctttttga ctctcatctt tgagataaat  
218821 gtgattgttt tttagaatat atgtcttaag gttatgctct tgcaagaat aaccctcgac  
218881 aaatataaat tctatctttt catcggtttt aaaatactgt gccttttcat aaactctttc  
218941 ctgtatataa gagcgttctt tactcaaacc aaaagggtatt atcacagata ataagggcat  
219001 aaatactaca cattccctat cgcataaagc tegtatgata ctactacttt atcttcttta  
219061 gaaacgacaa tttctttgat tttatacttt agcatgatct cttctgcctc acttgccata  
219121 gcatcagcat cgactacttt aggatttata ctcatgatct ctttagcttt aaaatcaaat  
219181 cttggtttat cattagcctt taaagcgcgg cgcaaatccc catcggttat aatgcctact  
219241 aacttttcat tttcaagcac caaacaaggt cctaatttcc cacttgtcat cacatcaaca  
219301 agatcattaa attcagtatc aggatgaact ataggaagat ttttagatac catcagatca  
219361 cttaccctag ttaaaagctt tctacccaaa cttccacctg gatgaaaaag agcaaaatca  
219421 tcaggctctaa aatttctagc cttcatcaaa gcagctgcta aagcatcgcc cattaccaaa  
219481 gtagcagttg tcgaagacat cggagcaagt tgcaaagggc atgcttcttc ttttacagat  
219541 atatttaaaa aaatatcccc ttgttttaca agagtagagt ttttctttcc acacatggct  
219601 ataagagggga ttttacgttt tttaatcgca gggatgattt ttaaaatctc ttctgtttca  
219661 cctgaatttg aaatagctat caaaacatca tcaggagtaa gcatccaag atccccatgc  
219721 aaagcctctc caggatggat aaaaaagctt ggagttcctg tgcttgctaa agtcgcagct  
219781 atcttagctc ctatatggcc tgattttacc atgccactga ctatacaacg cccctttgta  
219841 tggagcataa gttctatggc ttttagaaaa ttttcatcca aattttaaagc caaatcctct  
219901 atagccttag cctctgtcgc aaaaacttct ttagctgtct ttaaagcatc cataatcaca  
219961 ccttagatat ttaatactac attcgttgca acggcaattt gatataaaat ttgcgttagc  
220021 atagaaaaaa tttgtaaatt ctcactttcg acctaggca aaactaagac agaatcacct  
220081 ggcatcatat caacacttcc actatatctt tgagccttgc cattgtttgcg tataacaagt  
220141 actttggagg tatctgctct ttctccataa ctcctgcaa gattgatata gtattttaaa  
220201 tcttcaccct tattataaac aaaagctcct ggtaaagtaa cctcaccttg gactatgata  
220261 agattgtttt tactagggac attgatagta tcaccctctt ctaatataac ctctccataa  
220321 gattttgggt tatcgataac aatttgcccc ttaggctcta attctcttgc tctttggata  
220381 aactcaagta tcaattttgc ttgttctgct ttgatagctg caccctgaga agtcaactgaa  
220441 ggactagtta aagcaagggt ttcaagctct ttaagctgag cattgataag atctttttga  
220501 gttttagcaa cactttttct aaaaacttgc aaggcattca tgtccgattg cccatttggc  
220561 acgatcagtc ttgaaacatc ctctaacgtc gttccttttc gaaccaccaa agttttaagc  
220621 ccgctatgct cgccattgac tgttatactg atattttgcg aaatgtattc gggattaaac  
220681 tgcacctcat caccgtttt taataaaact ttagaaaatt gcattttatt ataagcattt  
220741 acttcaagct tatgatcatt tccataactt cttagtatcg cattagttac tataggtttt  
220801 gcacctgcta cgcgggctaa atcaataaaa gttttaatat catttgcaag ctcaaagcga  
220861 aacggtcttt gcacatctcc atttacaaaa acataacttt ggacattgcc caccaaaacc  
220921 acatcgccac ttctaaaagg aaaaagatcc atttgaccct taagtaaaaa atcatacaaa  
220981 tctatctttt taatcacagc attattgcgt aaaatttgaa tatctctaaa acttccgtat  
221041 tctaaattta tcccacctgc cttatcaaga tactggatca cagaatccga gctaagacct  
221101 tgataaagcc ctggagcatt aacctgcct gtgacaaaaa cgctaacatt ttgataagca  
221161 ttcatatccg cataaaciaa aacattattt ttataaattt tttttacctg agctttaatc  
221221 aacttaciaa gagcactatt ttttaccct agcaaattta cgcctcctac cttagggata  
221281 aaaatatttc cttgagaatc cacaactaaa atttgttcaa attcaaccgc accccaaatt  
221341 ttaagactga tttgatcgcc cactgcgatt ttatagtcag gattataaac cttttgagtg  
221401 taatttttga aatttccatt aaataattct gcgccaata caggaatttg agtaggggca  
221461 ctcttgctga tattgttttc tatattttga gaagagctag ttgtgctaga attcccgcct  
221521 gcgctaactc gtgaaacatc tatagctcca aaacaaaaaa tacaacttaa aaataaaatt  
221581 aatatttttt tcatttttaat acttgtgctc ctctataatc attttaacaa atttaatcac  
221641 cccaaaaatc aaagataata caataaatgc tgttaagata ttataaattt tttcagggta

221701 ttttgcactt tggggtacat caggggtttg aacgataact agttgtttta tctttcttaa  
221761 agcttctatc cttgcacttt cataagcttt caaagccgcc tcataagcac tttgagcaaa  
221821 gcctgcttct atggttagat cttgaaatth agcagctaga tcattgagtt tttgagaaga  
221881 attatcggct gaaatthtag atctttcttt aactaattgt ttttttaaag cagcgatttc  
221941 agcctthtag gttacaatth caggtgcgtg atcattcata tagctttgca tggttaaaag  
222001 cttagcttct ctttgagcga tatctgattc aagttgagtt actaagccgg ctttagcttc  
222061 tgcttgthtt agaggatcaa aaactccgta tttatthtga aaggcaatca aatcattthg  
222121 cgctthttga tagcgttctt tatatthttac caattcttct tccgcaaagc tcattthgctc  
222181 tcttgctgcc ttgtgtgaaa tttcattgat aaatthttca ctttcttgca taatggthtt  
222241 ggcgattaaa tgcgcagatt ctggagtaaa tccttcaacc tcgacattta aaagtcctgt  
222301 tttatcatcc acatgcactt taacgaggct ttgataatat tttaaataac tttctataga  
222361 gctagaactt gataagctaa aaaataaatc gatataattgc tcattgtaaa gthttthtag  
222421 atgaatthtt tcatctagaa tctthtaacat atcaagcgat tctatatagc cttgtaaaaa  
222481 cttgatattc tcgctagtat tagaagttgc ggttaaaagc gataaaacc cgcttgcttg  
222541 agtgcttcca gtagttgatt ttacactcat ggtgatagta cttacataac gatcagcggc  
222601 aatthaaata taataaatga tcacaaaaat catcaagatc catactatct tgaagaatc  
222661 aaaaataact agatctthta ttttattaaa aaatgtattt atthttgtca tthttthtt  
222721 cttgataga cggctatgcc ctcatctaca tcatcataaa cagtagcttt tccattthtc  
222781 ataaagataa ttttatcaca ccattctthta atthcagcca cattgtgtga aaccatgatc  
222841 actthtagatt ggctcaatct ttctthtatat aatthtatggc tthttctct aaatthtagga  
222901 tctctacag ctctgcctc atcgattaga taataatcaa aatcaaaagc catgctaagc  
222961 ccaaaagcta tcctagcact catacccgaa gaataagtat tcataggctc atcaaaaaat  
223021 ttgccaagct ctgcaaaatc ttctacaaat ttgactthtt catgaagctc ttcaccctta  
223081 tagccataaa ccctagctac aaatthtagca ttatctctag ctgttaagga tcttgaaaa  
223141 gctccactta gtccaaggg ccaagaaaat tthttattgg tgatgattth tctctatcg  
223201 ggaagctcag agccactthaa aagcttcatt aaagttgatt ttcctgcacc atthctacc  
223261 atthaaccta tactacaatt ttcaggaaat tcaaaagtaa aatctthtaa aacataatgc  
223321 cttccgcat taacaaagg ataagattthg gthaaatthta aaactthttat catgttcttc  
223381 tctctgctgt taaagctthgt ctattgtaat aatataaaaa aagtcaccaca aaagaagtg  
223441 atatgatgca aaatacagga taagtataag tataatcatc ttgcaaagga taatthtcaa  
223501 aaaaatthaa tctthaaaagc tccataacat gaagcaaggg gttgtaataa aatatacaa  
223561 gaatagthtt tggcataagc caagtaggaa agataacacc tgaaccccaa taaaatacta  
223621 tactaaaata atthaaagcaa gtctthtaagg gctctaaaaa atatccaatg atagcaaaaa  
223681 ccatacccaa agcaaaacc gaacacataa gtaaaaatat acaaatcatc acgctthaaa  
223741 aatgcctagg gataacttct aatctaaaaa accaacctac tataaacagt actgctacaa  
223801 atatacaaaa ataaatacaa aactcaagca aagtcctagc gataaaaaaca tgtatgggtt  
223861 ttacaggctt gtaggcaaac aagggcaaat ttgctgctat gccattcata agctgagtg  
223921 ctatacttct aaacataaaa taaggaacta tgcctgaaat taaaaacata aaaatagaaa  
223981 tcccttcagg catgagctgg tgatgatatt ctctaataat agtaactata atggtaagca  
224041 ttaagattac actcataggc tcgccaataa ccaaaaaata acccagatat tthttthttac  
224101 caaatctagt cthtaattct ctaaaaaca aagcgtgaaat tacattthaac atthttthttat  
224161 atacctaatt tttgcataag ctataatcat aactcattth tthaaacaaa tcataaaatt  
224221 ttatctthtt aaaattcaag cthtttgcca agtcctaaag cattgthttgt aaatthcagc  
224281 caatcaagct ctaaggcata aatthttgca ctcttatcca atthttgcaa aggaaatthtt  
224341 gaaaaataaa tthttatthtg ctcttgctt gcgctthttaa atthttgctt agcttgata  
224401 cthttthaaa aagctatctt gctthctthtg gctatathta gtgctatact aggathttcg  
224461 ctagctaatt ttatatgctt cgtatcttca tgtgaggcga tgataaaagc taaatthttt  
224521 tcatcaaaag cataaaaagc attggctata taaacacctt tttcatcact catagcccaa  
224581 gataaaagct gctcattthtt tataaattct aaaattctth catccattgg gtaaaattat  
224641 actaaatthtt tthaaaaaat aaccgatttht tcattthtaag catatcaaca caaggggagc  
224701 aaaatgcaaa ttgatgagc caaaaatcaa agthttthcaa tggactatac acaaaaaagt  
224761 ggcaaacacc tagcctthgtc tatgtatgat aatcaagct taagttatag caatgatgaa  
224821 gaaggtaaaa gtctthaatct taaacgcaa tatggthttta gcttctcttt tgaggctct  
224881 aaactcacc aagctgatct tgatgagata aaaaatgcaa tgaagaaggt cgaacctatg

224941 ataaaagact ttttggcaaa ttctaaagta ggagaattaa aacccaaaaga aatcatagaa  
225001 tcggcaatgc aaatggcaaa tgtattgcc aacgccaatg atgaaaacca tcaaaatgct  
225061 atcatgaata attttataaa taaathtagt gatttactca aacaaaatca aagcaatgat  
225121 aaagatatca atgcatccat gcttgaagat agcaaaaaac tactagatga agttttagag  
225181 caaatgaaaa agcagcttga aaaacagcaa gaaaaagcta aagaaaatca aaataatgca  
225241 gaaaaagggt taaatcttta cgcttaaat ttataataaa tcataaaaaa ttaaaaaagg  
225301 cacaagatga aaaatgttga aattttagaa aatatgctca agctccaaca aaaactcaat  
225361 gatgaaacta atggtttaaa ttgggaagaa ggttatacca aggaaggaaa gctcatcagc  
225421 tggagacggt gtatttatat ggaatgtgcc gaacttatag attcttttgc ttggaaacat  
225481 tggaaaaaca tttcaagccc tacaattgg gaaaatgttc gtatggaaat cgtagatatt  
225541 tggcatttta tcctcagtct tttacttgaa gaatatacaa ataaaaagga taaaaatttc  
225601 caagccatag cgaatgaaat catctcagtt agcgtttttc aagatttttg taaagaagag  
225661 ggcaatccta gcgaaaatga tctttatagc attttaaagc acatagagct tatcattcat  
225721 aaatgcagtg gctttggatt tagccttggga gagctacttt ctaattattd tctcctagcg  
225781 attaaatgtg gacttaatct tgaattctt tataaaacct acataggaaa aaatatttta  
225841 aatattttta gacaaaacaa tggctacaag caaggtactt ataagaaaga ttggaacgga  
225901 aaagaagata atgaagtatt ggctgaaatt ttagagcaag agcttgattt tgatactatt  
225961 tataaaaaat tagaagaata ttataaaaag gtgtaatttg aaaattttta gacttgctat  
226021 taaggatttt ttcacacttc aatttttgaa atttgcctta attccactta cttttagttt  
226081 tttttgatg atatttttgg caatttttgg tttttctttt ttgcttgatt attttaattc  
226141 tttatttagt gttggagaag actcgttttg ggcattggtt tacgctcttc attttgttca  
226201 aattttaatt acgcttataa gtgttttatt ttcaggcttt gttataattt ttgcttcagt  
226261 tttcctagcc ctttttatca cttcttttct tactccctc atcgtaaaac aaatcaataa  
226321 caaatactat catcacgaag tacaacat ctcaaatatg tatataattt ttgaaatttt  
226381 caaaatattt ttaaaattta taggaatttt tttactttgc accttggtt tgtttttgct  
226441 ttttatcaat ctttttgtgt attatcttgc tttttattat ctttttcata agcttttaat  
226501 gcttgatata acaagttcgg ttttagataa agaaaatttt aaaattttta acgctcaagc  
226561 atctaccttt gaatthaaat tcagcacttt atgtttttac ttgctctcat ctatcccgtc  
226621 ttttaggaatt tttttgcaag tttttttgt gattttttta acacatttag cttatcaaag  
226681 aattttaaaa ttagaagtta agggctgaaa tatcgatttt gtgattgtat aaataagctc  
226741 ttaaaagtct tggattttta gcgattctgc aagcttcttt aaattctttt ggcaattttt  
226801 gacaaatttc atatttataa acgatagcct tttcatcctt atacacgatg cctatttttc  
226861 cacctaaaac acaatcgccc ttcaaaaact cttttctttg tgctgcactt aaaagcaaac  
226921 ctttcatttt tacaacctta gcaatcaaac tttcattttt aggacaaatc ataagacctt  
226981 gaatttcttt tatagactcc aaatcataga gtttttttct atcttcatca agataaaaaa  
227041 aacttctttt taagccttga tgaattttac tcacaaaggc attggaaaaa ttttttctta  
227101 tataatttct aaaatatttt tcattctcat tgctctcatc ttgaaaataa aaaatatcat  
227161 tctcttttaa ataacttaaa atttcatcct tactcgtaaa aagcaaaggg cgtaaaaggg  
227221 tgtaattttg gcgcttttca cactcttgca tccctaaaat ttcggccaaa cccgctccgc  
227281 gagaaagctg cattaanaac cactccaatt gatcattgag atgatgggct aagataagct  
227341 tgtcataatt ttgctcaaga catatttttt caaaaaaatc ataacgaaaa tccctagctt  
227401 ctttttcaaa attccccttt atcacaggag cgatttttat aaaaattttt ttatgaaatt  
227461 ccaaggcaag ctcttggct ttttgctctt ctaaactgct attttttctc gttttataat  
227521 taatcatcac aagatcaaaa tcaatctttt tttgactaa aaaatgaaaa agcgcactag  
227581 aatcacttcc ataagaaaaa gcgagtaaat ttctaccctt ttttaacaag gataaaattt  
227641 catctttaat ttgcatctat ttttcttaaa gccttggcta tgagcttttt atcaacattt  
227701 tgaatgattt cgcattcata aatgttccc atttccaaat tcccacattc gctttcattg  
227761 ataagaattt ctccatcaat ctctctatcc catcttaaat ctttagctgc gataaaaaac  
227821 tcaccctcgc tactctcacc tgtacaacaa actaagcgt tttttccac ttctttttca  
227881 aaactttttt ctatgacttc atctacaatt ttttctatga ttttaagtct tttattgatc  
227941 actttaaaag gcacttgctc catatcaaaa gcagctgtat cttcttcttt agaatacgc  
228001 aaaacactca ctctatcaaa accaaaatct ttgataaatt cacaaagctc ctcaaatcc  
228061 gcatcgcttt cacctgggtg ccctacgata aaaccgtgc gcaaaaagct atcaggtgca  
228121 cttttcatca aatthaaat ttctttcaat cttgtgctat ttgctccacg cttcataatc



228181 ttaagcatat tgtcgccta gttgttgcaaa ggcataatcaa aataattttac aaaaatttta  
228241 gaagctataa tgcgcttgat caaagcctca ctgcacttg taggataaag atataaaatt  
228301 ctactgctt taataccctc gatcttttct acttcatcaa tcaagcgtat aagcccatct  
228361 ttttcacctt tatcaaacaa ataagaactc gtatcttggt cgataaaaga aaaatcctta  
228421 taacccttag ccaccaaatc ttttaagctcg gctataatgc tagaaatttc acgcgatttt  
228481 aacttacctt taaaacttgg gatcgcacaa aaagaacatt tttgattgca accttcagcg  
228541 atttttataa aagcatgtga attagatcct gtgatgatgc gtttgaggtt ttcaccctgc  
228601 aaataagtcg aatttgaaaa taaattgggt tttttaagta tcatttcacg gattctttca  
228661 taatcaccca caccagtaaa aagatcaact tcaggaagtt ctttcataag ctcttcacgg  
228721 taacgctgca tcaaacacc cgtcacaacc aaaagcgaat ctttttttct ttgctcatgc  
228781 aatctaaaa tcgcatgat actttctttt tttgactat ctataaagcc acaggtattt  
228841 acgattaaaa catcagcctt acttggctca tcgcaaagct cataagcgt aagacgcctt  
228901 agcataatct cactatcgac taaattttta ttacagccta aagacataag ataaagtttt  
228961 gacatctttt tcctatatta aagttttatt ttgatataat ctttgatttt aaaaatataa  
229021 ttatagcaaa gaaattttat ggataattac gaatttagcg aacttttaaa aacttttaaa  
229081 aacaaagtcg gcaacatagc ctctatcatc aagcctgaaa acatccaaac aaggcttaaa  
229141 aagatcgaag agcttgaaaa ttctcttct ttttggatg atgtcaagca agcaggaatc  
229201 ataggcaaag aaaaaacca gattaccaat ctactaaaaa actacgaaaa tgctttcaat  
229261 gctctaaatg acgcaagcga acttttcgat ctagccaaca gcgaaaacga tacagaaacg  
229321 cttgaagctt tatttaatga tgcgccaaaa cttgaagata ccatcacaaag tcttgaaatt  
229381 tccatgcttt taagcggaga aatgatggc aaaaatgcta ttgtttctat tcatcctggt  
229441 gcaggtggaa cagagagcaa tgactgggca agcatacttt atagaatgta ttttaagattt  
229501 tgcgaaagag agggtttcaa agtcgaaact ttagactttc aagagggcga ggaagcagga  
229561 ctttaaggatg tgagcttttt ggtaaaggc gaaaatgctt atgggtattt aaaagctgaa  
229621 aatggaattc accgcttggg aagaacctct ctttttgata gcgcaggacg ccgtcacaca  
229681 agcttttcaa gcgttatggt aagccctgaa cttgatgatg atatagaaat agaaatcgaa  
229741 gaaaaagata taagaataga ttattataga gcaagtggag cgggtggaca acatgtcaac  
229801 aaaacagaat cagccgtaag aatcacacat tttccaaccg gtatagtcgt acaatgtcaa  
229861 aatgatagaa gccaacacaa aaacaaagcc accgctttta aaatgctaaa atctcgcctt  
229921 tatgagcttg aactcatgaa acaacaagat agtgctaag caggtgaaaa aagttagata  
229981 ggctgggggc atcaaatccg ctcttatgtg cttttccctt atcaacaagt caaagacaat  
230041 cgaagtggcg aggccttctc tcaagtagat aatctcttg atggagatat taaaaaatg  
230101 atagagggtg ttttaatcgc tttaaaatca gagtaacagg cttaaaaata agtaatctc  
230161 gcagaatgct ggtataaaaa agaattagaa agatagcggg attttcccgc ttgttttatt  
230221 atcttgcata aattctataa gcatcaacca caggacaata aattcttttt ttaagatcac  
230281 tatcgcaata aacataaaca actttatagt cttttttatc gtttgatttt aataagaaaa  
230341 catagtttga gtatggatat ttatctatct ctaaatacag cttcatttct ttgattttac  
230401 ctcttgatc tttaaaatca ctaattgctc tgactgaagt ataatacaca agcttataat  
230461 ttggatattc tttcataatc tcttgattac ctaaatacaa catagcttga tcgttgccat  
230521 tgttttttaa ctgactaaa tcgccatcgc cacaaacctat aatcaaagtc ataactccca  
230581 aagccaaagc acttgtaaa atttttttca tttttgctc ttttttaaaa attaaattaa  
230641 tataattgta ctaaattta aaaattttaa tatcattttt gtaataaatt tttaaagtaa  
230701 aatcacatt aaaatttaac tcgcaatcat ttcattcaaa caaattttta tgtaaaatct  
230761 cttctaaaac cacggtagca taagagcctt tttgcaagaa aaactccatg caaaaatgag  
230821 ctttttgctc atcataacgc catttaacat cttctaaata cgaccacata aagcgtcttg  
230881 agccttgcat tttggcttta aattccaaag cgtcttttaa aatttcattt tccaaattta  
230941 aagccagtcc ttgacttgct tcgtaggctt tagcaccgat taaaagtccc atagcactga  
231001 tatctcttgc tttaaagcgt tcaagttcgg cacttaaatc ctacataaaa aaacatcttc  
231061 caaaaggata atgccccaaa acctcgcctt ttaaaagttt aaaaaactgc tcttgctttt  
231121 taagttcttt agcttcttct ttggaaatac tataaatttg tgctaattct ttttcagtaa  
231181 aatcatttgc aaaatgcgat aattccactc ttttactcaa ataacgatta aaaagctcgc  
231241 tttgaaaagc agagattaaa aactccttca ttttgacatt tttcatcttt ttaccagta  
231301 aaatttcaag cccttctttg taattgtccc caaatcttc aaagcgttga taacccaaat  
231361 aatttgcaaa acctgtttta tccaaattga ttaaggcctg ctctaatttt aaagcatcgc

231421 taggcaaac tttttttaag cgtataaaaa aagaatttcc ttttaaatgg cctattctta  
231481 atttattttc atgaataaaa gtttctaaaa ttttaagctt aggatgagaa aaattagcca  
231541 aaaaactctc gaatttttta ggcatagaaa gatattgaaa agtagagcct tgcttgtctt  
231601 taagcccagc atagccaaaa tcacgcatct taaccacct taattcgctt aaaattctta  
231661 aagcttcatt agtgcttaaa tcttttttat tgatatgcaa gataagatgt tgcgccttgc  
231721 cactaaattc atacaaaggc ctttcacgca ccacaaaatc atcactatct ttactaaaat  
231781 acgcattaat aggactgtgt ttttaagctat ataaaggctt aaaaatggtg ttctcttccg  
231841 ctaaattcat actttccttt cactgctttt ccaaaaatat ttatttttac gccatgtttt  
231901 tttgcaattt tttctatctt tggatactct ttttcatcaa atgcaaataa aatttcatat  
231961 tcttcccac tataaagcgt ataatcatca agtgttttaa accaagaaat accgcattta  
232021 tttgtgcta aaagtcttga taaatcttta ctcaaaccat ctgaaatatac catagcgcaa  
232081 gatataaaaag gtgcgatttc ataaaaaaaa tcaggcctta attttggtt tataaagaca  
232141 tgatttgaat ttaaagtgcc gccattttgc aaaatttcaa gccctcttaa acttttacc  
232201 aaaaccctg tataagcaag caaatgtcct ttttttagtc cttttctaaa aatagcctta  
232261 tttctactt tagaaatgat agtaatgcta atatcaatct tatcattact aatcgatca  
232321 ccgcctataa ttttgatatt aaatttttta gccgttttta aaaaacctt ttgcaaggcc  
232381 ttaatctcat cttcacctag actatttggc aaggcaagcc ctaaaagtgc gtattttggc  
232441 ttagcattca tcacaatagc gtctgaaata tttaccagca ttgcctttgt agcaatttgc  
232501 tctaaagtca gccattctct tttaaaatgc acattttcaa aaaacaaatc cttactcaag  
232561 caccatttat cgacgatagc accatcatcg ccgttttttt catttaaaaa agctttgatt  
232621 ataaaatctt cttattcat gaaaagattt tataaaattt ctttttaaat tctagtgaat  
232681 tttaaaaaaaa ttttatataa tacttatcaa aaggaaaaag catgaaaaat ttagaactta  
232741 gaatttttag atttgataaa caaaaagatt atgaggccta ttataaacc tatgtttatg  
232801 ataattatga aaattttggc actctttatg acttgctttt gcaagtgcaa gatgatgata  
232861 tttattttga ttttgaaaaa aatgataaaa gctatatcgt agtcaataaa gaatttttac  
232921 cattagacac agctttggat atattagtca aaaagtatga ttttaacctt accatagagc  
232981 cactaagcac taaaagatca gtaaaagatc ttatcatcaa taaagatgat tttttagaaa  
233041 aatttaataa ctttgctcca tttgcaaatg aagaagataa aaagctttat gaaaaatag  
233101 attatttgta ttattcaagt gaaattttag actttttacc tgaatatatg ggcgatgcag  
233161 tgttttatct ggcttcaaaa atgatagaaa aatatcctaa caaaaaata aaaatttta  
233221 agacaatttg tgacacgcaa aaaggatct tttatcatct gccaaagtaa aatgaagatt  
233281 tggaaaatat catcaaaaat ttacaaaaag aaatcataga tttaaaactt atcaatgagg  
233341 ctgctttaga atttgattta ccaaaaatca atgcttttga taatgaaatc aaagagcttg  
233401 gtgaagtaaa atatgatttt gataatttta atatcgcttg ttatggtttt aagatcaaag  
233461 atgatataaa atcaaaaatc aaagccatt ttatctctta tgaaaatagc gataaaaaca  
233521 atggattttc attacttcat ctaaactctg aacttagcta taaaatggca gcaaatatta  
233581 tccttgatgc ttacgatagc ggtgctgatt ttatagtggg aaatcaagca aaagattttt  
233641 atatgtttga cacttgctcg aaaaaactta tgcaaagtag cggaagagaa ttttaaggatt  
233701 tttatgtttt gagctatttt gaattccttt ctttaatcca agggattaaa aatccttctt  
233761 tgcaaatca tgacttgaaa gtaagtttga tatgaaaatt tctctagaat gtaaagattt  
233821 gatcatcgaa aaagccttag agcttttttt aaaagagcat ttagtgatga aaaaagattg  
233881 tgattttatt ataagtgatg aaaaaatctc tactcaaaag cttttattta ttatcgccaa  
233941 aaactcacc tttttaagtg tgccttttag caaagaaact ctcataaatt ctttaaatga  
234001 attcgatagc gctctaaaag caacggctca aaagctggct gatgaaagaa gaagggtact  
234061 agaagcaagg atagatgaaa tcgcaaatga atttaaaaaa gactatcaaa gcaagataga  
234121 tcttgctatc agtgagctta aagataaatt agttaaagct ttaatgtatg aataatgaat  
234181 ttgtaagtgt taaggatttt ttacagggtta aaaaaatat ccattttaat gactctacc  
234241 agcccacaa aaaagaaaa accaaaaaaa ctttgcctaa attatataca agcatagaaa  
234301 gtggcatata taaaggcaaa aaactgcttt tacctagtct tcaaaccaca agaagcacta  
234361 aaagtattgt aaaaaaatgt gtttttaatg tcttaagatt ggatttaaga aataaaat  
234421 ttatcgaagc ttttggagga agtgctttta tggctgctga agctttgagt aattacgctc  
234481 ttaaggctta tgccatagag cttgatttaa acgcttataa aattgcttta gaaaatgcta  
234541 aaaatataga tacaatttta aaagtaattc atgctaatac ttttgaaatg ttaccaaac  
234601 ttataaaaga ttctaaagaa gatattattt tatactttga tccgcctttt gatataagag

234661 aaggTTTTtag tGgaattttat gaaaaaatttt ataatttctt agaaaaatta aaattagatg  
234721 ctttatttttg tatcattttta gagcataatt ccaaaataaa aactcctgat aatatagcga  
234781 attttaccAA aacaaaagaa aaaaaattcg gatcaactag tcttagtttt tatcaaaaaa  
234841 atattctaga agaataaatt ttaatcttgg aacacttatt gcttctttta ttctaactat  
234901 cagattaaag gaagaatcga tgagggtttt aacatttttt ttacttttga tgacgagtgt  
234961 ttttgcaaca caaataaaag atatagctaa taccgtaggc gtaagagata atcaacttat  
235021 aggctatggg cttgtttagg ggctaaatgg tagcggagat ggaacaagct cgaaatttac  
235081 actacaatcc atatccaatc ttttgCaggg tatgaatc aaagtagatc ctaacgatat  
235141 caaatcaaaa aatacagcag cggttatggg aacagccaaa cttccagcct ttgcaaaaag  
235201 tggagataaa cttgatatca cagtttcatc tatgggcgat gcaaaatctt tacaaggtgg  
235261 aacactcttg cttaccgcac ttcgtgggat cgatggggaa atttatgcta tcgcacaagg  
235321 ttctatctca acaggaggat taactgctag accaggagga acaggctctc actctactgc  
235381 tgctactgtg atgggtgggg ctaatgtaga aagagaaatt ccacaaaatt ttagccaaat  
235441 tgatgattta accctaagct taaaagtagc ggattttaaa acagcaagtG atatagaaag  
235501 aattttaaat accatatttg atgaagaagt agctagagct attgattctc gcacagtaaa  
235561 acttaaaaaa cctgaagatc tttctaattg tgattttatg gcaagagttt tagagcaaga  
235621 tattgcttat actcctcaa gtaaggtaat tatcgatgaa agaacaggaa cagtgattgc  
235681 gggagtggat attgaggttg agcctgtttt aatcacccat aaagacatta ccataaaaat  
235741 tgatccaaac aataatgcag cagcggctca aaatgaaatc gatatgaaag atgggtggctt  
235801 tgtagatcct aattcaaaca ccctaagaat caacaatgcc aaaagtacag ttgcaaacat  
235861 tgctagaatg ctaaacaaac ttggagcaac gccaaatgat atcatcGcta ttatggaaaa  
235921 tttaaaaaga gcgggcgcta tcaatgcaga tttggagatc atctaataGaa agtagataat  
235981 tttttaagca cttatagtat gaataatgcc ctgcttgaac gtgcagctaa agcaagaaat  
236041 ttagaatctg attttaaaat caataacaat gagataataa caaaaacca agaagatgaa  
236101 gccttaaaag agcaaactga tgcttttgaa gcttttttc taaagcaagt tttagatgta  
236161 tctttaaaaa ctcaaaatc actttttggg aaagatgcaa gtgatgaaat ttattcatct  
236221 atgtataatg ataccatgag taaggcctta agtggcggta tgggattttc aaaattatta  
236281 tacgattttt taaaagaaag gggttaaagt ttttaatttt tggccgatat agtttGtaga  
236341 ggatttatat aaagatcaaa ggaggcagaa atgatcaatc ctatacaaca aagttatgtg  
236401 gggaatgcca ctttaaatc aacaaaaaca gataaagaaa ctaaaacaaa cgatactcaa  
236461 aaaacagaga atgataaagc tgcgagaatt gcagagcaaa tcaaaaatgg tagctataaa  
236521 atagacacaa aagctacagc tcaagcaata gcggaatctt taatttgatt tcattctcct  
236581 ttttttgagt taaaaaggag aatgaaatgc ttaaacaag attagatgaa gtcaatgcta  
236641 tcttaacaaa actcatagaa ttaacacaag aagatataga aaatataaaa attgcaaagc  
236701 atgatacggg tgcttcaagt gttgaagaaa aaaacaagct tattgctgaa tttagcGctg  
236761 ctaaaaagcg acttgattct gctttagttg aacttaataa tagctctaca aaaggactaa  
236821 gcgaattgct tgatgaggaa gataagcaaa aattagatct acttaaaaaa aatttacaaa  
236881 cccttcatac cacaaataaa gaatatgcga aattcgttct tattgtcaa gattttcttg  
236941 atggccttagt aaataaaatg tttgatatga atgatggaac aaataatgct tatggagata  
237001 aaaagactac tccagagtca atttttaaa tcaatgttta aggattaaag atgggtattt  
237061 ttggaacttt atatacagga gttaccggtt taaaagcaag cgaggtgcaa attgcaacta  
237121 caagtaataa catctccaat gcaaatgcaa ctttttatac tcgtcaaaga gtagtacaaa  
237181 ctacaaatgg ctttgttaca acagggtggag tacaagtggg aacaggaaca gccatagaaa  
237241 gcatagtccg cttgcatgat gagtattcat attataagct taaaggtgct tcaaatcagt  
237301 tagaatatac aaaatatatg gcctcaactc tagaagaaat tgccaacgc ttccctgatt  
237361 tgcaaagtac tggaattttta caggacttag aaaattataa taaagcatgg aatgactttg  
237421 cttcaaatcc aatgaaaat gctactaaaa tagcccttgt aaaagcttct caaacctaa  
237481 cagaaagtgt aaataacacc tttgccacct tagataaaaat ccaaaaaaaa gtaaatgatg  
237541 atatcaaaaa cactgtggat gaaatcaata gaatcggtga agaaatcgct actatcaata  
237601 aacaaattta tggTcaagaa gctctaccaa cagatcatgc aatgaactt agggatagaa  
237661 gagatgagct tgagcttact ctttcaaaat tggTcaacgc agtagcaagc aaaaatgaaa  
237721 tcaatcaaga caatagactt gatactacaa tcatcgatcc aggacatcaa tacaatctca  
237781 gcatagaagg ttttagcata gtagatgggtg tgaattttca tcctttaaaa cttgattatg  
237841 atgataaaaa taaagcctat agtattttat atgaaactcc agatgaaaaa gttcgcgatc

237901 tgactgcaaa aatcaatggc ggacaactag gagctcaact tgacttacgc ggaagaaatt  
237961 atagcaagag tgaaggaaaa tatagcgatg gaatcatcca aggctatatg gactctttaa  
238021 atacctttgc aaaaaccatg atcaatgaaa ccaataatct ttatgcaagc tchgcaaaaa  
238081 gctcggcaac ttctgattat cttccaggac ttacagagga ttttctttg gtaaattatg  
238141 acagaactat acaaccagga agctttgata tagttattta cgatgataag ggtgataaaa  
238201 aacttcaaaa aactattacc gttgatgtaa ataccacat ggaagatatac atgctgcaaa  
238261 tcaatgcaag ttttagctat gatgcaaaaa caggagacag tttatttcaa atcaatgcaa  
238321 tcaatgcaag ttttagctat gatgcaaaaa caggagacag tttatttcaa atcaatgcaa  
238381 aatcaggctt taaagtagcc atagaagata agggaaaccaa ttttgctggt gcatttagca  
238441 taggaggatt ttttagcgga actaatgcta gcgatataca agtaaaagat tctatcttaa  
238501 atgatccaag cacggtaaga gctagcttaa atgggtgttg tagtggaat gatatggcaa  
238561 ataaaatcat acaacttcaa tacagtaaag tgaattttta caatgaagat ggaacaattg  
238621 ataactttac tatggaagag tattaccgca aacttacggg taaaataggt tctgatgggtg  
238681 agaataacaa tgcctgtaaat gcaagcaatc aaacgcttta taactccggt tatagcgaat  
238741 atcaatctaa aagtggagtc aatacaaacg aagaattagc cgctctcata caatggcaat  
238801 caagctatgg cgctgcagca aaaatcgtaa ccacagtaga tcaaatgcta gataccttgt  
238861 tagggcttaa atcctaagct ctagcgggat caagtgaaaa attttatcca gcttaaaacc  
238921 aaactcgatt ctttagtcaa agaaaaaat accaacaagg ctctttttga aagtcctgac  
238981 ctttgcgaga tcgctaaatt tcataatgat gaattttattg ctttactttg tgctttattt  
239041 gcttatggaa atgctaaaaa tatagtcaat tttttaaaaa agcttgattt ttctttgctt  
239101 gatttaagcc aaaaacaaat tcaaaaagaa cttcaaaatt taaaataccg ctttcaaaat  
239161 gaaagagata tacaagaaat ttttctcacc ttttcaagac ttaaaaatga aatttcactt  
239221 catgagcttt ttagcacagc ctatgaaaaa agagaaaata ccaccgatgc gatcttagct  
239281 tttttgcaaa aatcaagac tttaaattcg tattcaagtt atggttatga tttttcttt  
239341 ggtaaaattt ggcaaaatac tcctacttca cctcttaagc gttataatat gtatctaaga  
239401 tggatggtta gaaaagatga acttgatctt ggccttttta ccaaaattca cacaaaagat  
239461 cttttaatcc cacttgatac acatacacat aaaatttcct tgactttagg tcttctaag  
239521 cgtaaaatat acgactataa aagcgtttta gaactcacac gtaattttaa aaaattggat  
239581 gcaaatgata ctataaaata tgattttgca ctttatcgtt tggggcaaaa taaagcactt  
239641 agtaaatata aggagtaaaa aatgggcttt gaacatctag atacgattta ttattttgta  
239701 ttgttttttg tggccctttt tgcaggattt attgattcta tcgtgggtgg aggtggactt  
239761 atcacacttc ctgctcttat agcttgcgga attcctgcac atctttcttt agcaaccaat  
239821 aaactccaaa gtgtctttgg ctcttttaca gcgactttaa cttattttta atcaaccacc  
239881 ctacctcatc ttgcttatgg tatttttttc acagccttag gcgcagccat aggaagttac  
239941 agcgtgcttt ttgtaaaaga tgagcattta aaacttatca ttttgatttt cttacttta  
240001 acttttttat atactgcttt gcgtcctagc ttgggcaaac acgagagtga agcaaaaata  
240061 aaaaatatca aattttttca ttttaattgt ggattaactt tgggttttta tgatggcttt  
240121 ttggggcctg ggacaggttc attttgatt tttgcttggt taatgctact aggttttaac  
240181 atgaaaaaag caagtatcaa tacaaaaatt ctaaatttca ctagcaatgt cgttgccctt  
240241 ttcatctttt tgtggcaata tgaactttta tggatagtgg gtttacttat ggggttagga  
240301 caaatttttag gagcctatct tggatcaaaa ttagtactta aaaccaatgg taaatttata  
240361 aaaaccctat ttttaatcgt agtgggtgct actatcatca aagttgcttg ggattatfff  
240421 tcttaaaaat ttactcctga gctaagttcc catatcggca aaaaaattcc aagcgtataa  
240481 aacaatacta aaatcgcaac ccacaaggtc attataggct ctaaaagct taaaaactta  
240541 tccattaaat tttcactttt atttttgtaa tactttgcaa tctcctcact taaaaactca  
240601 agcttagaac tcttcatagc tacactcaac atagaaaaaa ccaaaggatc aaaaagatct  
240661 acttttttaa aagcataact tatttcaagg ccagaatcca taaatgtttt aacttcttga  
240721 taacataata atatcttttt attattttaga gccaaagtgg ctagcctaaa agcatctaaa  
240781 agagaaattc cgctttttta aagcaaggaa aaaatcataa aaaaagaata attttgctga  
240841 taaatgataa atttagacaa taaaggaatt tttacaagta agctatcgca aaaatagaa  
240901 aagaaataat attttctata taaaaataaa gcaagaaata aaacaactat gattaaacaa  
240961 agcacaagca aaatatattt gtctaaaaaa ttataaatat aaattataag cttagttata  
241021 aaaggtaggg ttaaatttaa atcctcaaat aaatctttaa aattaggcac acaaaaaagc  
241081 attaacaaaa caaaagctgc gcatacgtct aaaaaacaa tcaaaggata tcttaaagct

241141 tttttgactc tttgttcatt ttctacatta ttttgcctta gtcttgaaat ttgcataaaa  
241201 atttcactta attttcctgt gttttgggaa gttttaataa gggctaattc cgcatagagta  
241261 agcccaaaat ttgcatthttc aaaggcaagg cttaaatttt gtcctaaatt taaattatca  
241321 caaagccttag caatcatttt gtgagaatat attttattaa gctcatttaa agcatctttt  
241381 atgctgattc ctacttcgca aagcagggat aattcttgaa agaaaaggat aaatttctca  
241441 ttatccaatc tcttaaaacc cgctttttgc atctctttga tatttaaaat ttcccatttt  
241501 ttagcgatag cttttgcttg agcttcattt aaatttctag ctcttaaatg ctttttctgt  
241561 tttgttttgt ctttaagaat ttcaagctca taaagcttca ttaagcacc cttacaagctc  
241621 atctatgcta gttatgccct cttttgcttt ttgcaaacc tgctcaaaca tactttgaaa  
241681 accctttgct ttggcaagct ctaaaatttt atttttataa ccaccctctc taataacttg  
241741 agctatttcc tcatcgatat ataaacactc gctaataagc tccctacctt gatattccact  
241801 atgatgacaa tgctcacaac ctttagcctc aaagaaatca ctttttattt cataaatctt  
241861 agtgcttttt tgcttgctt taggacaaag tttgctgact aaacgctggg caataatgat  
241921 tcttaaagca gaagcgatca aataaggctt tgcattcata tcaatgagtc tatctatggt  
241981 agaaatggca ttatttgtat gcaaggtact taaaagcaag tgtcctgtta aggaagcctt  
242041 aatcgctata tcaagactct cctcatctct gatttctct atcatgataa tatcaggatc  
242101 ttgtcttaaa atagctctta gggcattatt aaattcaagc cctgcttttg gatttagcaa  
242161 aatttgctga actagaggca ttttatattc tatgggatct tccacagaaa ttattttctt  
242221 ttctatactt tttagctcat ttaacaagc atacaaactt gtactttttc cacttctgt  
242281 aggacctgtt agtaaaatca ttccataagg gttgtatagg gcttttttta aaattgtaag  
242341 attttttctg cccaaattta aattttctaa atccaaaatt tcttcgttgt gttttaaaat  
242401 tcttatcaca atgctttcgc cttttgcaa aggcaaagat gaaatcctaa aatcatatct  
242461 attttctttg attttaagct caaaatttcc atcttgtgcc tttcttgatt ctgcaacatt  
242521 aagctgtgat aaaaatttaa tatgaaaaac caaagcctca taaatatctt tttcaagaca  
242581 agcaaattcg cgtaaaattc catccactct aaatcttatc aaagcatcat tttctcttgc  
242641 ttctatgtgt atatcactgg gattaaattc aagaatttca tccagtataa aatcaaaaat  
242701 ttgactgata taactttgct cttttggta tttattttct ttccattcta acctaagatt  
242761 ggcacttaaa ttttgaagct tttccttaac ttgaagttta tataaaaatt tcataatctt  
242821 aaattcattt gcgatcaaaa cttctatatc tttagcttcg taaaaaattc taatttcac  
242881 taaaagctct aaggaacagg gtttagaact tgctatataa agtgtatttt cttactcaa  
242941 aatgggtaga attttaaaat tcaaaagaaa actacatgga aatttttcac ccaaactaag  
243001 atcaagttct tctaaagtag aataagaaat attttcatcg ctagctaaag attttaaaaa  
243061 actttcacta tcgattttat gctcgtgata aatttgctca aggggtgattt tatcattgat  
243121 ataactttga aataaaaatc gttcaatcat ctatttcctt atcaaaattca atcaaacat  
243181 aataactcac ataagtatcc aaggcttgct tagcctcctc atcttttctt aaagcttggt  
243241 tggccttggga aaataaaatc catgaagatg aatttttct atcgatatca ttagccttta  
243301 aagacaaaaa aatagacttt tcataatctt tttttcata atatcgagca gctaaattca  
243361 tagccttttc ataacttggga ttttggtaaa aatttctttt taaatcactt atatttaaaa  
243421 gtttagaata aatcctgatt tgagttttta actcctcttt taactcatct ttgttttcat  
243481 cttgggataa tctttcttgc aaaattttat tttttcatt tgcaatttgt gcttgtgcca  
243541 tttgatgatt gagtgttttt ttatattcta aagcctccaa agctaaggcc ttttgcttgt  
243601 aaaaattttg tatcacaaaa aagcttataa ccatacacac caccaaagca gcaaagataa  
243661 ataaaaattt gaaatatttt ttcaataaat atcttttgta tttatcctca agctcacgca  
243721 ctgctcttc tatattcatt ttaaaaacc ctgctctaac gcgcttagtc tcaaaatata  
243781 atcttgattt ttgttgttgt ttaaataagc gtttaactcg caaaaacttt gaagtatttt  
243841 gtctaaatat cttaaattgc cttgataaat tttcataaga aattttaaaag acttttgaga  
243901 aagctcttga tcaaatctca ttttaataa actgcttaat tcatttata taggcttttg  
243961 aagccaaaac atagcactaa aacgactttt aaaatactcc ttttcaaaaa gattgatttt  
244021 tttatgtgag ctaagtacaa aactcatttg atcactataa atccgaatta attcctaata  
244081 atcagggcta tacatcccca cttcatctag tatgataatt tttcgttttt tatcttgtat  
244141 aaatttatga aaatcttttt catctgtaaa aatttgatta gtaaaatcct cattatgatg  
244201 caacgcaagt ctttgcaata aaacactttt cccactaccg cttttacccc aaagtaaaat  
244261 caaagctttg ttctttaata aggcattgat ttgattaaaa cattcttgtc taaaagcaat  
244321 tatattattc attgtattta aatcctaact ccctaagact aggtatatgt gtattgtcta

244381 ctataacttgg ggtgatgata aaaacaatth ctgtgatatt ggaatthttca tcttcacttc  
244441 taaataaaga acccaaaaata ggaatthttag ataaaaaatt cacagaatta ttatthttgtg  
244501 agcgattatg agagatgagt ccgccccaaa ttaaagtttg attatthttct acttgcacca  
244561 cacttgaaag cthtttttga attgtatcag gtgcatagt gcggggttct ttctgtcttt  
244621 tattgtcctc tggatactta aatcactca aacttggatt gattctaagc atgattthtc  
244681 catcatcaga aatthcgggc aaaatattaa gcaaaattcc tatgaaaata gaataattac  
244741 tataactthc acttactgtt gtaccattht cagtgcctth agagctthct tthacttgat  
244801 aattcacagt atcgcctatg gaaataatgg cttgttgatt gthtaagcc attaatthtag  
244861 gattagacaa aacttggtt thtccactth gggataaaaa attaacaata gaatcaaat  
244921 tcaaattcgc tcttaacc aaatthttaa caaaccttg accatthtgt atthgcataa  
244981 aagaatthgt attatcactt gthtgagaat ttagtcctat attgaaatth tgccaattga  
245041 tcccactaga atgattthta ttaagattta cagcaagtat gctcacatct ataataactt  
245101 gthtcttaag acggctthca agctthtgca aataagctth tacgcgttga agctgagaat  
245161 gcgttccagt aacgataaca agtccagcat taggattgac tatgggtgct tthtatgtcgt  
245221 agthttcatg cgaagagcta agtaaatca taatthctth ttctatatt thccaaaagt  
245281 caaatthtc catactctta atcatattat cthcattat thcaaaagca ctataatact  
245341 cactthgcct tggthtagaa tccactgaag cthtagttat gctthgtcct tctcttactg  
245401 aagtgatata gthgattthta aaaatthtag thtgtaaggc agaatthttt aacaccttg  
245461 catcaaatth ataagctaaa tctgttctth ctataaaaag thtaaaaatt tcatctaac  
245521 tcatttggtg gatattgata ctgctthgaa cagththttaa thttctthta gcaatcgtat  
245581 cthtaaccac cacactaaa gaacaataac tagcaagctc cthtaagctc tctctatac  
245641 tcaaatctth atthtatgctt atatcaata agcgcctthg gcattctatg gcataaatga  
245701 gatttgtaaa aatagaaat ttaataaata ttaatctth cattgthttt aaatgctatt  
245761 thaaaatcca agtatcgtat tctthaaata atthctthtg tagtaatat agtaatcacg  
245821 gcctccccta tcttatcacc cthtttatac catttattat tgatctthgc tctatcaagc  
245881 ataatagcag taatthttat thctthgatt thttcaaaag taggattgaa gaatggattt  
245941 tgaaaatthc caagttctac actctgctth gtatthtaaa tcttgaaata thctthcaaaa  
246001 tcctcatatg ataacaaagt gcaaaagcac aatgttatac thtaaaaata thttatcagc  
246061 tctcaacctc attgctaaaa tcagccatag caatthctth aagttgtcta tagcgacgt  
246121 gtgcatctth thtattgctg tcaataatth cthttgcatg ctctggattt gattthttca  
246181 aagaattata gcgcacctca thcattaaaa agctctcata aagatcccaa tcaggctctt  
246241 thcttaccat agthaaagga thtttaccct gctcttctaa tcttggatca aaagtataaa  
246301 gaggccaata accacattht gtagcaagtt cgccttgctc gcctgaatat ccaagtccgc  
246361 cthtaatgcc atgagcgata caaggagaat agcatataat caaagaagga ccatcataag  
246421 cthcagctgc cataatagcc thaatthaaat ggctataat thcagtagaa thaatctgctg  
246481 ctacaaaaat ataaccataa gtcatagcaa tctgaccaa atctthttt tgtataggct  
246541 thctgctgc tgcaattgt gcaactgcac ctgtcttga agatthtgaa cthtgaccc  
246601 ctgtatttga atacacttct gtatcaagta ctaaaatatt tacatthtca cgccttgcta  
246661 aacatgatc aagtccgcca taacctatat cataagccca gccatcgcca caaaaatcc  
246721 agtgagattt thtacttaga aatgtthtth aatthaaat atctgaaca gctthaatat  
246781 cagtgtthtg thcthaaata ggtatcatct tatctthgat thctactgat tctgctctt  
246841 tgtctthatt agcaatccat tctthaaaca atgctgctaa agcgttaggt actthttgca  
246901 tathttcatt cataatattt tcaatacgat atcttgtatt thcagttgca atthttcatac  
246961 ccaagccaaa thcagcatta tctthaaaca atgaatthcc ccaagcagga ccgtgtccat  
247021 thttcacgct thttctataa ggagtagaag gagccgaacc thcataaatc gaactacatc  
247081 ccgtagcatt agcgataatc atthctthcgc cgaataatct tgtaattaaa gtgatataag  
247141 gagthtacc acaactgga catgctccat ggaattcaaa taaaggctga gcaactgcg  
247201 cccctthagt gctthctthta thtaagatat catctthgta agtaatthct thaaataaat  
247261 aatctgcatt thcttgcctca ccaaatcca thtctcttg aagaggaacc ataaccaag  
247321 atthttctth agtaggacac tcatgcacac aaagctcaca gcctgtacaa tcaagcggag  
247381 aacctgaat thtgaaactt aatthttcac cthtagtgcc cthtagctct aaagcgtgat  
247441 cthttactcc cthtgagct thtagccatth cthcatcatt gatcaaaaat ggtctataaa  
247501 ccgcatgtgg acatacagaa gcacattgat tacattggat acaattagcc tctatccatc  
247561 thggccatc tacccaacg ccgctthttt catattcagt cgttccatgc tcaagcttc

247621 catcttcata acccaagaaa gtagatacag gtaattcatc ccctttggct gcattcatag  
247681 gtttaacgat cttttcaaca aattcgggtac ctttgtaagc attggtttgt tctttttcct  
247741 tgatttctaa atttttccag cttggatcaa cttctacttt tacaagtcca tctgctccta  
247801 catcaatagc tttgtaattc atctctacaa tagcatcgcc ttttttgcta taagacttat  
247861 aagctagctc tttcatatat ttttgagcat cttcataagg aatgattttt gctagtttga  
247921 aaaaggcaga ttgcatgata gtatttgtac gatttccaag tcctatatca cgagcaagtt  
247981 ttgtagcatt gatgatataa aaattcactt ctttttcagc caaagtcttc ttaactgcat  
248041 ctggaagttg tcttatggtt tcttctgcat tccaaatact atttaaaagg aaagtcctc  
248101 cttttcgaat tcctgctaaa acatcataaa tttcaagata agctgctacc gaacaagcga  
248161 tgaatgtgg agttgaaaca agataggttg agcggatcgg ctttttagaa aatcttaaat  
248221 ggcttcttgt atagccccct gattttttag aatcataagc aaaatacgct tgtgcataaa  
248281 aatctgtttt atctccgatg attttaatag aatttttatt agcaccaca gtaccgtctg  
248341 cacctagtcc ataaaataaa cattctatag cactttcatc ccctaatgaa atcttttcgc  
248401 ctgtttgcaa agaagtgtga gtaacatcat cgataatcc aactgtaaag ccatcttttg  
248461 gattatcaag cttaagattt tcaaaccacg ctatcatttg cgcaggatca acatccttag  
248521 aagaaagtcc atatcttctt cctacgataa caggagcatt ttctttgcca tagaaagctg  
248581 atttgatatc aagatataaa ggctctccaa gacttcttgg ctctttagtt ctatctaaaa  
248641 cagctatttt tttcacagat tttggcataa catcaaagaa gtatttttaa ctgaatggac  
248701 gatataaata aacttttaca atccctactt tttcgccctt agaattaaga tgatcaacaa  
248761 cctcttcaag agtttgagtc acagaacca tagctataac aattctttca ggctctttgt  
248821 gtccataata agtaaatggt ttatattctc tacctgtgat ttttgaatt tcttgcatat  
248881 attcatttac aacatctggt aaagcatcat aaaaacggtt gcttacctct cttgtttgaa  
248941 aataaatatc atcattttga gccgttccgc gtgttttagg attttcagga tttagagcac  
249001 tatttctaaa ttcaagtaaa gctttacgat ctaataatct atcaaaatgt gcataatcca  
249061 ttacttcaac tttttgaatt tcatgtgaag ttctaaaacc atcaaaagag tgcaaaaacg  
249121 gcactcttcc tttaatcgca cataagtgtg ccactccggc taagtccata gtctcttgta  
249181 cagaatgtga acaaagcata gcaaaaccaa tctgtcttgc agcataaata tcttgatgat  
249241 caccaaata agataaagct tgcgctgcta aagaacgcgc tgctacatgg atcacacagg  
249301 gaagtagttg acctgcgatt ttgtacatat ttggaatttt tagtaataaa ccttgagaag  
249361 ctgtataagt tgtggttaaa gctcctgttt gtagtgatcc gtgcactgta cctgctgcac  
249421 ctgcctcact ttgcatttca acgattttta ctggaacacc aaaaagattt tttttaccg  
249481 cagctgcca catatcagtg taatcgcca tgggagagct ggggtgtaata ggataaatac  
249541 cggctacttc agtaaaggcg tatgcagcat atgcagcggc ctcatttcca tccatagttt  
249601 tcataatttt acccatagaa accttccttt attattaatt gataattttt ataatttttc  
249661 ggccaccaat ttactataaa ttctcttaaa aggcgtttaa caaaaacttg aagttagttt  
249721 aattattttt tataataaaa actgatttat aggcacttga aaatacctta gaatagcgtt  
249781 ttaactcatc ttcatctcca taaccacaac tcaaagccaa aggggtaata tttgccgcct  
249841 ttgctgcttg gatatctaag atcgtatcgc ctatcatata ggcattttct ttagtttttt  
249901 gcattttttc caaggctaaa agtatgggtt ctgcatgagg ttttggattt gttacatctt  
249961 caagtgttat taaagtttta aagaattttt tcaactcctaa atgctcctaac aacaatggag  
250021 taaattttcc acccttagtt gtaactatac ccaaatctcc gatctcaaaa gctaattcta  
250081 aagcttcttt tgcttttaggt aaaagagtgg tttgttctaa ataaatctgt gaataaattt  
250141 cacgataagc tagaacaat tcttgactta aattcgcctt atcttgataa aggaatttaa  
250201 acatagctc taaaggatga cctataagat ttttaatctc ttcgttattt tttggagtta  
250261 gtccaaggat tttaaaagct ctttgaaaag aatttaagat ggcatcagta gaatcaatca  
250321 aagtgccatc taagtcaaat aaaatagttt ttttcattag tttaaaataa atttagcctc  
250381 tactcttcta ttatccgctc taccttcttt ggtatcatta cttgagcgag gtttatcttg  
250441 accatagcca accgtttggga tacgactttt atctacgcca aatttttcaa gctcttttgc  
250501 aacactttcg gcgcttcttt ctgaaagttt ttgattgtat gatcttgaac ctgtattatc  
250561 agtatgacc tctaaaatag tatcatatct tacattttca tctaaaattt tagcaatttc  
250621 tttgattttc tcttcaaagg ctggattgat atttacttta tcaaaatcaa aatgcccttc  
250681 caaataaatt gttttttcgc aaccattttc atctaacaaa gcaccctctc ttggttctgc  
250741 aggacatttt gattgtgaaa ctacaggagc tggagcggga gttacaactt gaggtttgct  
250801 aaccacttct tttgtttgct ccactacaac tttttcttgc tttagcaccia aacaaaaact

250861 aacacccaaa gttgaaaccc aactatgatc cgcacatgg aaagaaatth gatctcttgt  
 250921 ttcaagtctt aaagctaaag aatcactaag gcgaaattht aaacctgcmc cataatgacc  
 250981 aaatcctcca cttttattat caaaggcacc atgagaaaaa tcctcgtatc cccaccagc  
 251041 taaaccataa aaataaaatt tctcacctaa atcaatgcct ttaatagcac tcaataaagt  
 251101 tctagtaata tctggtgtaa gagtagaatt tgtatathtt acatccgagt aatgthtcaa  
 251161 acctagthct aattgatcaa gccaaaaatc atcaaaatga tathcctaath taathcctgg  
 251221 tgcathgcca ttathcathat ctaaathacc thcaaaataa thgtaathca aagthaggagt  
 251281 aaththcaath ththaththgt thththgacc aaataaaacg ththgccaath cthaaathag  
 251341 thaaathctth ththathcaaa gcctththata gataaathca ththaaagthg gcgaaththca  
 251401 aththaththath aaaaataaaa aaaaataaath agthaaathaga gataaathath aaaaagcggg  
 251461 aaaaccccgcc tgaagathaa cgththgaga aththgggct thththctgct ththgcgcgct  
 251521 cgtathththth acgctcaaca gththgctath thththgaga aagthcctthth gthththata  
 251581 aagthctaaa athcagcathc athagccgcta aagthctthga aaththcgtgth ththaaagcct  
 251641 cagctthgagc athataacca ccaththaaag thcgthgctth aathathcath gaagththctth  
 251701 gththagththac aagthaaaggc tgaathactth thagththgath thgctthcath ccaccaagcc  
 251761 aagthaththaa athcgathaca ththaaagctga thththaccgct athctggthth acccathactth  
 251821 thgctathagc agthththctth ththathgthg cathathgthg thgctathgath athththctth  
 251881 ththagcaath thgcgcagthgth gthgggthgctc aththaccgca thaaathththth aththththaa  
 251941 cathcgctcta ccaathththg thththaggaag cathathctcta athgcthaath thgthataathth  
 252001 thcgaggaathth thththcaagtha aathctccgaa thththcgctth ththathgctth caaaathathc  
 252061 tgaathgctgth thgataaagct ththctthctgth ththaththgca cctgthaaata cagctththga  
 252121 agcaththgath athathcathath aathcaccaca athcaathata ggagthaaagc aagthththgth  
 252181 ththathctthth aaaaaththgthg ththctthcagth thaaagacga ccaathagcgtth thgctthctgth  
 252241 gthcthaaaaca athcaththctc gththaaactth gththggctthth gththathctthth thcathaththct  
 252301 ththathththgth caaaathththth aaaaathgthgath thgthataaaaa athathaththaa thththaththth  
 252361 aththaaagthth aaaaathaaaga athathththth ththththata thththaaaaa thththaththata  
 252421 thgathgathth thgathctataa aththththata athcaaththaa ththththathca ccaathcaag  
 252481 gcgathaththaa ggaathaaathth thththaththth caathathctthth athththgagth aththththaaath  
 252541 thththththththg aathththacca ththathctath ththaththca aagctthththth aaagaaathg  
 252601 gaaathagathct aagcathathath thgathththaaa ththththaaath caaththaggc thgathcaagthc  
 252661 ctaththathctth athathaaathth thcathathctth thcathagathth thathctthaaaa gaaathaththaa  
 252721 aaththathgca athcaththathct thctthcthaath aathgththcaaa agthaaaaagth aagthcgtcaaa  
 252781 aathcathcata agthgathaaath thctthctgthth ththaaathcata thgthgthgaaa aththgthccag  
 252841 thththththgcaaa aaththththgaaa caathathcath thaaagaththct thgthcgtathth thgaaaaththc  
 252901 ththgthagaath ththththathct ththththathctth thgthththaaathth gaaathththaa aathcaththaa  
 252961 gaththaaathth aathcathaaagg aaaaathaththth thagctthththaa aththctthctthth athcthaaththc  
 253021 aththagctthth caaththgctgth acctthcaaga thccaagthath ththagagathc thctthathctth  
 253081 gthathgthththth thcathathththg athgthaaaaac thcaathathct thagthagctath aaththctthth  
 253141 athaaagctcgth gththctthth

//

LOCUS DMACINML\_3 185032 bp DNA linear 16-DEC-2020  
 DEFINITION *Campylobacter* species strain strain.  
 ACCESSION  
 VERSION  
 KEYWORDS .  
 SOURCE *Campylobacter* species  
 ORGANISM *Campylobacter* species  
 Unclassified.  
 COMMENT Annotated using prokka 1.13 from  
<https://github.com/tseemann/prokka>.  
 FEATURES Location/Qualifiers  
 source 1..185032  
 /organism="*Campylobacter* species"  
 /mol\_type="genomic DNA"



```

gene      /strain="strain"
          complement(234..1229)
          /gene="ansA"
          /locus_tag="DMACINML_00520"
CDS      complement(234..1229)
          /gene="ansA"
          /locus_tag="DMACINML_00520"
          /EC_number="3.5.1.1"
          /inference="ab initio prediction:Prodigal:2.6"
          /inference="similar to AA sequence:RefSeq:EAQ71964.1"
          /codon_start=1
          /transl_table=11
          /product="L-asparaginase"
          /protein_id="Prokka:DMACINML_00520"
          /translation="MAEAKPKIAILATGGTIAGSIDSAVATTGYTAGVVGVDVLKAV
PQIQDLANISGEQIANIDSSNMRDEIWLKLAKKINKLFDEGVDGCVITHGTDTMEETA
YFLNLTVKSDKPVVLVGAMRPSTAISADGPKNLYNAVALAADKEAKNKGVMVAMNDKI
LSARGVVKTHSLNVDAFSSPNFGDVGIVDGKVFYNNISKAHTKNSPFDVSKLTSLP
KVDILYTYSDGSAIAAKALFDNGTKGIVVAGSGAGSIHEDQKNALKELIKQLDQVWV
SSRVAAGRVAVSDTDKGLGFI SAEDLNPQKARVLLMLALTKTSDPKKIQEYFLKY"
gene      complement(1367..2938)
          /gene="recJ"
          /locus_tag="DMACINML_00521"
CDS      complement(1367..2938)
          /gene="recJ"
          /locus_tag="DMACINML_00521"
          /EC_number="3.1.-.-"
          /inference="ab initio prediction:Prodigal:2.6"
          /inference="similar to AA sequence:RefSeq:CAL34209.1"
          /codon_start=1
          /transl_table=11
          /product="putative single-stranded-DNA-specific
exonuclease"
          /protein_id="Prokka:DMACINML_00521"
          /translation="MKTINKSEIKKILASRFEKDLHTKLCDLPLPCCCLKDAYKAANRI
KEAIDKNEKIAIVGDYDVGDIISCVIMAEFFDDIGFDYTVRIPNRFKDGYNLAEIIN
ELDVNLIITVDNGIAAFEAAKLCKEKNIDLITDHHMPQDILPDAFAIINPKQKDCDF
PDIEICGAQVAWYLIAALKEVCKLKYDMGKFLELLAIAIVADMMELRDLNRLVRRGI
ECINKSKRVAFKAIKQYYQKDKFALDNIGFLIAPLINSAGRMDASISYEFLHTKDL
KASAYLEQIISFNESRKDEEKQLFEDSLSQIDENDSCIVVSGLNWHEGVLGIVASRLA
KHFNKPAFVFSQNDQRLKGSARSVGKIDILALISKANSILSNYGGHKGAAGLSLDLDS
FEKFKTIKKECEISQSEFLDTDEILGILDPNEIDFEMLEILESFEFPGHKNRPF
ILENLYVKNKKFLGKDEKHLKILTKDNKTIEALFFNFDKEPQLCENINLLGSISKNE
FRGLATPQFIIKEIL"
gene      complement(2925..4559)
          /gene="pyrG"
          /locus_tag="DMACINML_00522"
CDS      complement(2925..4559)
          /gene="pyrG"
          /locus_tag="DMACINML_00522"
          /EC_number="6.3.4.2"
          /inference="ab initio prediction:Prodigal:2.6"
          /inference="similar to AA sequence:RefSeq:CAL34208.1"
          /codon_start=1

```

```

/transl_table=11
/product="CTP synthase"
/protein_id="Prokka:DMACINML_00522"
/translation="MSKQTKYIFVTGGVLSLGGKIAAASIATLLKNSGLKVSILKAD
PYINVDPGTMSPFEHGEVFTDDGAETDLDLGHYERFLDESLSQDNNFTTGRVYQSVI
EKERRGEYLGKTIQVIPHIVGEIKERIKKAGEGKDILLIVEIGGTVGDIEGLPFLEAIR
ALRLEVGKNNAMNIHLTLVPFIKAAGELKTKPTQHSVGLRRIGISPDMIIICRSEKAL
DRDLKDKIAISCGVEKNCVIESVDAASIYQIPLNFKQDILNPIASILDKLNKPNME
NWDILVKRVIAPSNEVKIAFVGKYVDLKEYSKSLTEAIIHAGAALDTRVELQWVDEK
LENLESAEAFKNVSGILVAGGFGYRGVEGKIKAIHYARENKIPFLGICLGMQLALVEF
ARHVLKIEDANSSEFDDKCSNPVIVYLIDEFMDASGKKQIRTAKTPLGGTMRMLGSYECK
VKPNSLLAKVYNNAKNIKERHRHRYEANPKYRKEFESKGLIVSGESEGLIEAVELNNH
PFFLAVQFHPEFTSRLERVNPVICGFIKAAISYEDN"
gene 4672..5295
      /gene="thyX"
CDS   /locus_tag="DMACINML_00523"
      4672..5295
      /gene="thyX"
      /locus_tag="DMACINML_00523"
      /EC_number="2.1.1.148"
      /inference="ab initio prediction:Prodigal:2.6"
      /inference="similar to AA sequence:RefSeq:CAL34207.1"
      /codon_start=1
      /transl_table=11
      /product="thymidylate synthase"
      /protein_id="Prokka:DMACINML_00523"
      /translation="MQITLLFHTPLSVCSHATRTCWQSFDKGDCGGEKDKELIDRVGN
KFKHASTLEHLNYTFYIQGISRAQLQEVARHRHTSPSVKSTRYTLKELRNESEFKIGD
FENASRYLVLCGNEEVDNASIQALENLRILQKSISLDIAKYCLPESYKTELTLTINA
RSLQNFISLRSSKSALWEIRNLANALFEALPQDHQFIFEHLHKDIH"
gene 5414..6799
      /locus_tag="DMACINML_00524"
CDS   5414..6799
      /locus_tag="DMACINML_00524"
      /inference="ab initio prediction:Prodigal:2.6"
      /inference="similar to AA sequence:RefSeq:CAL34206.1"
      /codon_start=1
      /transl_table=11
      /product="putative sodium:dicarboxylate family
transmembrane symporter"
      /protein_id="Prokka:DMACINML_00524"
      /translation="MDKQFFQMFLMFSQIQTVAIIVLFIYILKKMRDKKVNFSLR
MLFALFIGLGLGFALQYLAQFPDSKEASTIIWYNEAKHWFGFVSSVFVAFIKMLVIPL
VGICIIKVIIIEIDKNIKISSLLGISLFWILFSTAIASAASLGIILLAYNFQLGDNFTAYEG
ARQIREIQTFSIIILGLIPSNIISVMNKENIIAIVIFAFFVGICAKKVKKEEYEQAF
QTFENFVLVFNIMMNTATVIRFMPYAVVCMANVLLSNGFEAIKTAGLFIIILTYIA
MFIMFGVHFLLLASQGLNPIKYAKKAFPVWLFASFSSSLGTLPMTTSTLQNKFGVNP
AVANFVASIGTTTGLNGCAGYFPAMAAVFVAFATHTPIDFTFALMIVLVAVIGSLGIA
GVPGSATMAASIMLAGIGFDNFVMLSILAIIDPIIDMARTASNVSGAMTSALCTAKN
LKAIIDKEIYNS"
gene complement(6831..9200)
      /gene="nrdA"
CDS   /locus_tag="DMACINML_00525"
      complement(6831..9200)

```

```

/gene="nrdA"
/locus_tag="DMACINML_00525"
/EC_number="1.17.4.1"
/inference="ab initio prediction:Prodigal:2.6"
/inference="similar to AA sequence:RefSeq:CAL34205.1"
/codon_start=1
/transl_table=11
/product="ribonucleoside-diphosphate reductase alpha
chain"
/protein_id="Prokka:DMACINML_00525"
/translation="MKVIKRNGRTEELDVSKIKKCTFDAIKDLEGVNLSELELDAKIQ
FRDGISTEEIQKTLIKTAVDKIDIDCPNWFVAARLFLFDLYKKVNGMNRYNHLREYF
EKGEKEGRILLGLKEKYDLDDLNDYIMPERDMQFTYLGIKTLYDRYLIKDSKGMPIEL
PQQMFMAIAMFLAQNEFNPQEWAKKFYDLISKFELMLATPTLSNARTTRHQLSSCYIG
STPDNIEGIFDSYQEMALLSKFGGGIGWDWSKVRAMGGSIDGHKNAAGGIIPFLKITN
DIAVAVDQLGTRKGAIYVYIEPWMDVSDFDIDLRKNSGEERRRAHELFPALWINDLFM
KRVRANDKWTLPADTQDLCDLYGEAFEKRYEYEEKDESIVKEIVEAKELWKKILLN
YFETGLPFLCFKDNANKANPNHAVGIIRSSNLCTEIFQNTPEPNYYKIKVIFENGDEKH
FDEEERVVIDGGYEKPAKKISTLDSFNGNKVYIVEKYKSDGKTAVCNLASINLSKVYT
KEDIERVVPTAIRMLDNVIDLNFYPHRKVKDTNLKSRAIGLVMGEAQMLAEARIHWG
SDEHLNKIDEIMEKISYEAINASSNLAIEKGSYPDFEGSNWSKGFIPIDVASEKAKAL
TLREGLFNQSECDWDKLRKVKADGMRNGYLMIAIPTSSISILVGTQTIEPVYKRKW
FEQNLSGMIPVVVPNLSLETWQYYTPAYELDQRILVKAAAVRGKWIDQGQSLNIFLSL
DKASGGYLNDIYQLAWELGVKSTYYLRSESPDSEKINVADRSIECEGCQ"
gene complement(9215..10543)
/gene="purB"
CDS /locus_tag="DMACINML_00526"
complement(9215..10543)
/gene="purB"
/locus_tag="DMACINML_00526"
/EC_number="4.3.2.2"
/inference="ab initio prediction:Prodigal:2.6"
/inference="similar to AA sequence:RefSeq:CAL34204.1"
/codon_start=1
/transl_table=11
/product="adenylosuccinate lyase"
/protein_id="Prokka:DMACINML_00526"
/translation="MVERYSRREIMAKKWDMQAKYDAWLKVELAAVKAWNKLGLINDTD
CEKILKNAKFDIARIDEIEKTTKHDVIAFLTSVSESLGEESRFVHYAMTSSDCIDTAV
ALQIKESLDLILEDVSLLEVIKKRALEHKNTLMVGRSHGIHGEPITFGLVLAIWYDE
ILHAKELLEHAREVISYKISGAMGNFAHAPLKFEEVCKNLDLKPAPVSNQVIQRDR
YAQVISAIAILASSCEQIAVAIRHFQRTEVYEAEEYFSAGQKGSAMPKRNVPVSEN
ITGLCRVLRFSVTPALENVALWHERDISHSSVERFILPDAFVTADFMLMRLTNLIDKL
LVYPENMMKNLNLTGGLVFSQRVLELFPFKGISREEAYKIVQRNAMKVVADLQNGKAA
INENNESLFLALLADEDLRKSLEEDIRKCFDYNYYTKNVDAIFARTFK"
gene 10584..11519
CDS /locus_tag="DMACINML_00527"
10584..11519
/locus_tag="DMACINML_00527"
/inference="ab initio prediction:Prodigal:2.6"
/inference="similar to AA sequence:RefSeq:ADT65449.1"
/codon_start=1
/transl_table=11
/product="RNA pseudouridylate synthase family protein"

```

```

/protein_id="Prokka:DMACINML_00527"
/translation="MEFYLKFRERLSLAYTKIKLSNNGKKAQVFLIDNLKININEAQ
KLIDKKRLFCNGILVEEKNKILQGNVELIVYENNPKGVEIAFENEDFAVLEKESGILS
HPNGRHCKYLSDEIWHLWGKEACVAHRLDKETSGLILVAKHKKAQIELKGLFEKKQI
QKEYLALASGEIKANFVDQAMDLT KDYDDVKTRMQICENGGKKAITEFEVLSFYPKIN
ATLLLCKPLTGRQHQRVHLFYKNHKILGDPLYGLEKKDIEKILDEKMDIEERIKLSG
AKRLCLHSYRLKFNYDGENFDIFSCKGIEKILTAF"
gene 11647..12513
/locus_tag="DMACINML_00528"
CDS 11647..12513
/locus_tag="DMACINML_00528"
/inference="ab initio prediction:Prodigal:2.6"
/inference="similar to AA sequence:RefSeq:ADT65448.1"
/codon_start=1
/transl_table=11
/product="fumarylacetoacetate hydrolase family protein"
/protein_id="Prokka:DMACINML_00528"
/translation="MKFVNFKLNQKATLGVLNSSGKVINLADLDINVRDMNELIINF
NFKHKFKDLDSKTAYEIPKEDYLAPIIEPRQDIICLGINFLDHAKESAQFKGEKFEER
EYPVYFGKRCNQATAPFGSISLHADVTSQLDYECELAFILSKDAYKIKAEADAKDYIFG
YTIINEISARDLQKRHKQFYRAKSLEGSTIMGPYITSVDEIAYPPELNLQSYVNKELR
QNSNTKFFIFDIGYVLEELSSGMLLKAGTIISMGTSPSGVMGLNPPVFLKKGDEVRCV
IENLGEICNVIT"
gene 12571..12738
/locus_tag="DMACINML_00529"
CDS 12571..12738
/locus_tag="DMACINML_00529"
/inference="ab initio prediction:Prodigal:2.6"
/inference="similar to AA sequence:RefSeq:CAL34199.1"
/codon_start=1
/transl_table=11
/product="disulfide bond formation protein"
/protein_id="Prokka:DMACINML_00529"
/translation="MEFLELLLVLIALLIILIKKPEKENLAFGLVIVAWLLMVFFYIGH
KTGALLTIMNL"
gene 12753..14270
/locus_tag="DMACINML_00530"
CDS 12753..14270
/locus_tag="DMACINML_00530"
/inference="ab initio prediction:Prodigal:2.6"
/inference="similar to AA sequence:RefSeq:CAL34198.1"
/codon_start=1
/transl_table=11
/product="disulfide bond formation protein"
/protein_id="Prokka:DMACINML_00530"
/translation="MNEINKTKNFYTLMLAGFLIILLPVGIANFVFGYMWGDSPCTL
CWGQREAMIFIGVMALFIVRYGMKGKYLAALLIMTAVGLYQSFAHYGNHAHRDLQGF
GLAVFGIHTYFVAEVFWAVVLLLGVMFAFAPKFGSFDKELNGEKFRKFTKFSFAAVL
ISTLIVASNVFQAFVSTGIPPYVGGDPVRFSLNPKYIIWSTGGWNLWQNISFLGKR
DVKAPDYAFAPASEKLGKIFDNDTNSPFAEIDDELKIIDEQTFINFDKAINTLDYIND

```

```

EFVASSKWDVAFLDNNFSTKEGFELDPYFSATIDPIIGIIPYKENKFLLMGSNKSFLR
FAKNPNADEALQYADFVKGNDQFEGQGKDLGRGRLDTRAKFNHVASMTTDDHYLYLA
TVPNNKDSKTFVISKISLKDVLVSAEFTPKAELKEGKTLGDLYITSMFKDDEIYALS
KNHNVIAIINPTKEEVKTIAPSSITNARSIFFKDGGKIHILSYQDGANKLYTLK"
gene      complement(14290..14721)
          /gene="yjaB"
          /locus_tag="DMACINML_00531"
CDS       complement(14290..14721)
          /gene="yjaB"
          /locus_tag="DMACINML_00531"
          /EC_number="2.3.1.-"
          /inference="ab initio prediction:Prodigal:2.6"
          /inference="similar to AA sequence:UniProtKB:P09163"
          /codon_start=1
          /transl_table=11
          /product="putative N-acetyltransferase YjaB"
          /protein_id="Prokka:DMACINML_00531"
          /translation="MIKHYEKLNQEQAQGLLEIWEQSVKATHNFLDEKNFRTIKEYLQ
NADFKDLNFLFAYKNDEFVGFGLGADKECIQMLFVKPEYFRKKIGSKLLQKALDDFKIK
KVEVNLNPNALKFYQKFGFEKVGGEYKDDDFGFILIKMEIKS"
gene      complement(14724..15410)
          /locus_tag="DMACINML_00532"
CDS       complement(14724..15410)
          /locus_tag="DMACINML_00532"
          /inference="ab initio prediction:Prodigal:2.6"
          /inference="similar to AA sequence:RefSeq:CAL34197.1"
          /codon_start=1
          /transl_table=11
          /product="putative transcriptional regulatory protein"
          /protein_id="Prokka:DMACINML_00532"
          /translation="MSKKALCIISGGMDSTLCAYLAKKEGYEIIALHFDYQRTQEKE
KECFKQICKALNVEKSYIFDVFSFIANIGGNALTDQSIHIPKNELSDTPPITYVVPFR
NGIFLSIAGSLAEKENCESIFIGVVEEDGSGYPDCTEKFIQKAQEFINEGTSKHFITS
LKTPLVNLNKTQIVELALKENVPLELTWSCYESEDEACGECDSCLLRLRGFERAGFKD
KIEYKKYKGL"
gene      15810..17036
          /locus_tag="DMACINML_00533"
CDS       15810..17036
          /locus_tag="DMACINML_00533"
          /inference="ab initio prediction:Prodigal:2.6"
          /inference="similar to AA sequence:RefSeq:CAL34196.1"
          /note="hypothetical protein Cj0015c"
          /codon_start=1
          /transl_table=11
          /product="hypothetical protein"
          /protein_id="Prokka:DMACINML_00533"
          /translation="MINIKLIEHIFKAASISRWNDYPRMANLVELDKQAHKFIIAYFI
AKMEKDVDMKIIIEGGIFELSRVVVTDIRPDVYHEIVRQKKAEVNAWVLSKIEPMIE
DIEDGEFLKRFEAYLNGNTYAKERLILKAASYFATRWEFNIVYQTS AFLNDIDEIKNK
VDEELEDYYELIGARKIALNQKIAKIIDLSGRLRFQKRWAQTPRIPETA VLGHMLVVA
ILGYFYSLKIKACDKRLENNFYCALFHDLPESLTRDIISPVKYGIDGLHTIINDYEMK
LINDRILPFVPENLRAEFSYILGIREGRSNEANFVKNEFENRTYKNAKIELCSGSLSS
FNQNEFGAIDGKALKYCDKIAAFIEAGLSISYGVKSKELESGFEDMFKFFNESPTIDG
VNFLEICREFRDYFKI"

```

gene complement(17082..18758)  
/gene="ilvD"

CDS complement(17082..18758)  
/gene="ilvD"  
/locus\_tag="DMACINML\_00534"  
/EC\_number="4.2.1.9"  
/inference="ab initio prediction:Prodigal:2.6"  
/inference="similar to AA sequence:RefSeq:CAL34194.1"  
/codon\_start=1  
/transl\_table=11  
/product="dihydroxy-acid dehydratase"  
/protein\_id="Prokka:DMACINML\_00534"  
/translation="MRSDAIKKGHLKAPNRSLLRACGLKDEDFDKPFIGVANSYIDII  
PGHYFLNEYAKIIEKDEIRKNGCIPFEFNTIGVDDGIAMGHEGMLYSLPSREIIANSVE  
SVMNAHQLDALICIPNCDKITPGMLMGALRVNVPTIFVSGGPMRSGVTKKGEKISLSS  
VFEAVGAYEANKISEEEFKDIECSACPSGGSCSGMFTANSMNTLCEAMGIALEGNGTI  
LALSKEREELLRKAARRICEIALDERFKIKNIITQKAIRNAMVVDMMAMGGSTNTILHM  
LAISREAGVALDIKDLNFISSKVAHIAKIAPSLNTVYMDDIHKAGGVSAMAEISSRE  
GHILELDALTITGENLQERLKNKIKDETIIRKVDNAYSQVGLAVLFGNLAEQGCVV  
KTAGITGERKFKGKAVCFNSQDEAIKGIKGVQKGDVVCVIRYEGPKGGPGMQEMLSP  
TSLIMGMGLGADVALITDGRFSGATRGLSIGHVSPEAAEGGLIGLLKDGDEIEIDVDA  
YTINANLSDEEIAKRKNEFVMPQKEVKSRLRMYQKLVTNASKGAVLDME"

gene 18909..19556  
/locus\_tag="DMACINML\_00535"

CDS 18909..19556  
/locus\_tag="DMACINML\_00535"  
/inference="ab initio prediction:Prodigal:2.6"  
/inference="similar to AA sequence:RefSeq:AMP62754.1"  
/codon\_start=1  
/transl\_table=11  
/product="rubrerythrin family protein"  
/protein\_id="Prokka:DMACINML\_00535"  
/translation="MRQYESYKCPKCGNEVEVQNVGGKLSCCGVEMECITQDLTAVN  
LMKAFAGESMARNKYDLFADVAEEEGWHAVARHFRFAAENEKWHARAEFKAYHEIVDG  
KPLEVTTKNLVAAAEGENYEHTTMYPNFAKIAEDEGKKAIRLFTAIGKVEIEHEREY  
LALKKMLEEEFFNSEVEELWVCEVCGHIHRGKKAPACPLCKAPKEYFKREFLG"

gene 19561..20169  
/gene="rnhB"

CDS 19561..20169  
/gene="rnhB"  
/locus\_tag="DMACINML\_00536"  
/EC\_number="3.1.26.4"  
/inference="ab initio prediction:Prodigal:2.6"  
/inference="similar to AA sequence:RefSeq:CAL34191.1"  
/codon\_start=1  
/transl\_table=11  
/product="ribonuclease HII"  
/protein\_id="Prokka:DMACINML\_00536"  
/translation="MGDFSPFLRENKTLFEENELLTPFDIDLVGIDEAGR GALAGPM  
MMAACKLHKDLEGLCDSKLSSEKRREELYEIIILLHSDYLILAFSSEKIDEIGLSACKL  
MGLTLIKKHFKTENNFLYDGNTNLGISGIKTQIKADANIKQVSAASILAKVSKDRVMN  
FLAKDFPCYEFKKNKAYGTKAHKELIAKFGICKLHRKSFKLL"

gene complement(20164..21615)  
 /gene="gltD"

CDS complement(20164..21615)  
 /gene="gltD"  
 /locus\_tag="DMACINML\_00537"  
 /EC\_number="1.4.1.13"  
 /inference="ab initio prediction:Prodigal:2.6"  
 /inference="similar to AA sequence:RefSeq:CAL34190.1"  
 /codon\_start=1  
 /transl\_table=11  
 /product="glutamate synthase (NADPH) small subunit"  
 /protein\_id="Prokka:DMACINML\_00537"  
 /translation="MGNARGFLDFKRVDFKVKVAPKERVLFNFKEFTLLDKKEQEIQGG  
 RCMDCGVAFCHTGVMSEGGKDVGCPLNNLIPEWNDLIYRSLWKEAYERLDLTPFPEFT  
 GRVCPAPCEDSCVCAINGKSVSIKNNELAIENAFKENLVSPNPKPKQYNGKKIATIGS  
 GPAGLACANTLNSLGKVSFERSDKVGGLLMYGIPDMKLDKSIIVRRVDLLKESGIE  
 FKVNIENIDSKDKVSKLLKEFDALVLCTGASKPIDLDIEGRKLGVEFALDFLTQNTKT  
 LLKTGKGADTAKGKNVLVIGSGDTSVDCIAVATRQGAKSIVRFERSPKRPLQRSQNNP  
 WPLKADIFTTDYGLEEAIYVEKDPREYQKMTKKFLGKDKVESVEACDLKREFKEGKA  
 INVLPNSNQYKADLVLLAMGFSGSEDAIASNFGVSLDEKNNVKTKKFQTTHEKIFA  
 CGDARKGQSLVWVAIKDGIIECALSIHENLAKQS"

gene complement(21625..26115)  
 /gene="gltB"

CDS complement(21625..26115)  
 /gene="gltB"  
 /locus\_tag="DMACINML\_00538"  
 /EC\_number="1.4.1.13"  
 /inference="ab initio prediction:Prodigal:2.6"  
 /inference="similar to AA sequence:RefSeq:CAL34188.1"  
 /codon\_start=1  
 /transl\_table=11  
 /product="glutamate synthase (NADPH) large subunit"  
 /protein\_id="Prokka:DMACINML\_00538"  
 /translation="MDLENIENQSVGLYHPKNEHDACGIAAVANIRGIASQYKVICD  
 ALEILMNLEHRGGAGAEENSGDGAGILIQIPHDFMTQELGFLPQKGDYAVAQMFSL  
 PNADAKEEAKEIFLQGLKDKNLEFLGFREVPFNPSDIGASALKAMPYFLQAFVKKPST  
 VNAGLEFERVLACRRLEIKRALHVPKFFYSSFSRTIVYKGMLLSTQLSDFYLDKFD  
 VNMKSAIALVHSRFSNTFPSWERAHPNRYMVHNGEINTIRGNVDSIRAREGLMESEY  
 FENLDEIFPIIAKPSDSAMFDNTLEFLALNGRTLEEAFMMVPEPWHKNNMGSKKR  
 AFYEYHSLMEPWDGPAIIVFTDGVIMGASLDRNGFRPSRYLTKDDMLILSSETGAL  
 KLDENNIKAKKRLEPGKLLLVDTARGRVIADNEIKEHYANAKPYKQWLKNLVELEKQH  
 SGVYKHKFLKEDEVLLKQAFGWSYDELKMSVASMAQNGKEALAAMGVDTPLAISLKT  
 YQPLYNFKQLFAQVTNPPLDAIREEIVTSTRIYLGSEGNLLKPDENNAKRVKISLPI  
 ISNEELFEVKALNNFQVKEFSILYEYSKVTLEQALDNLCVKIEEIEIKKGVSIILSDK  
 GVDDKNAYIPALLAVSGVHNYLVKRNLRHTSIIIESGEPREIHHFACLLGYGATVIN  
 PYLVYESIQKLIENKDLNVSYDKAVENFIKASSSGIVKIASKMGVSTLQSYNGSALFE  
 CLGLSSKVIDKYFTSTTSRIEGMDLEDFEKELIALHKHAFNDTHKALDSKGIHSFRSA  
 KEEHLIDPLVIFNLQQACRNKDYKSFKKYSALVDEKQVNLRLMEFDFSEAISIDKVE  
 SAESIVKRFRTGAMSYGSIKEAHECLAEMNKIGGKSNSGEGGEDEERYEIKDGVNK  
 NSAIKQVASGRFGVDLNYLTHAKELQIKVAQGAKPGEQQLMGFKVYPWIAKARHSTA  
 GVTLISPPPHDIYSIEDLAQLIYDLKNANKDAKISVKLVSENGIGTVAAGVAKAGAN  
 LILVSGYDGGTGASPRTSIPHAGIPWELGLAETHQTLILNKLDRVRLETGDKLMNGR"

DLAIAALLGAEFGFATAPLIVMGCTMMRVCHLNTCPFGIATQDKELRDRFKGKVDDV  
VNFMYFIAEELREYMARLGFERLDDMIGRVDKLRQKPMQGGKAGKVNLDKILKSLPTYN  
RTAVHFKDYKDNKLEKTIDYRILLPLCKNAVEKKEPIKLSLEVGNQSRFTATMSSEI  
LKTYGKDALSSEDSIQIKAIGNAGNSFGAFLLKGIKLEIVGDSNDYLGKGLSGGKIIAK  
ISNEATFSPEENIIAGNACLYGATEGEVYLDGIAGERFCVRNSGAKAVVLGTGVHGCE  
YMTGGLVVVLGDVGANFAAGMSGGVVYIFGRHNEAHVNTLVDIKDLSAKDEKELKTM  
IENHIAYTNSKKAKDILEKFDKDFFKVMPRDYEMLEIELCKDEEDPSLA AFLKIT  
QK"

gene complement(26249..27550)  
/locus\_tag="DMACINML\_00539"

CDS complement(26249..27550)  
/locus\_tag="DMACINML\_00539"  
/inference="ab initio prediction:Prodigal:2.6"  
/inference="similar to AA sequence:RefSeq:CAL34187.1"  
/codon\_start=1  
/transl\_table=11  
/product="putative Na<sup>+</sup>/H<sup>+</sup> antiporter family protein"  
/protein\_id="Prokka:DMACINML\_00539"  
/translation="MTLLTNPIIISVVLMTLLCLFRFNVLLSLLISALVAGIFSHIEI  
MKTMSILIDGMKGNLKTALSYILLGAIAAAISRNTLTAYLIKVVS RFISHKKYLLLLS  
IALISCFSQLPIIHVAFIPLLIPLLSLFNKLIKIDRRVACALTFGLTTPYMLVPIG  
FGLNFQDLLRENLEKNGVNVSLVDVTNAMYAAICMVLGLFLALFVYRKP REYQEIE  
IQKIDFDNIKMRKEWGLVGLILTLVLQIFTMNLPLSGLLGFISMVILGGVEYKSVN  
DIFDDGLKLMGFIAFVMLVAAGYGEVLKQSGAVNELVNSVVPWQMENKFLAVFLMLLI  
GLIITMGIGTSFGTIPIIATLFCPLCLELGFSAALIIIFILGVAGALGDAGSPASET  
TMTGTSVGLSVDKQHDHIKDTCIPTFIFYNGPLLILGSIIAMFL"

gene 27793..28152  
/locus\_tag="DMACINML\_00540"

CDS 27793..28152  
/locus\_tag="DMACINML\_00540"  
/inference="ab initio prediction:Prodigal:2.6"  
/inference="similar to AA sequence:RefSeq:ABS43397.1"  
/codon\_start=1  
/transl\_table=11  
/product="hypothetical protein"  
/protein\_id="Prokka:DMACINML\_00540"  
/translation="MNLNAEQKNAVLRFKKFVSRNKISLNL SLIVLICYYIFVLGIG  
LMPEILGYKLGPSITLGMVIGLILLCCIISTGIYTFIANYFLDKEQE EVIKNELE  
GLLDALKDGKINYKELV"

gene 28149..29795  
/locus\_tag="DMACINML\_00541"

CDS 28149..29795  
/locus\_tag="DMACINML\_00541"  
/inference="ab initio prediction:Prodigal:2.6"  
/inference="similar to AA sequence:RefSeq:ABS44294.1"  
/codon\_start=1  
/transl\_table=11  
/product="cation/acetate symporter ActP"  
/protein\_id="Prokka:DMACINML\_00541"  
/translation="MKVFIFLSLIFNLALSAGFDLGEVHQKPINITAVSMFLVFLAT  
LFITYYSNKKSKSGFYTAGGNITGMQNGVAIAGDYMSAASFLGITALVFTNGFDGL  
IYSIGFLVGWPIILFLIAEKFRNLGKFTFADITAYRLEAKPIRVIS AISALSVIIFYL  
IAQMVGAGQLIQLLFGLPYTFAVVLVGILMICYVTFGGMHATTWVQIIKAILLLAGAT  
FMAVMILYLTKFDLKYFFDLAISHHPKGENIMKPGTFLPDTISALS LGLALMFGTAGL



```

PHILMRFFTVKDAKEARKSVFYATGFIGYFYILTFIIGFGAIALLLGNPQFTNADGSF
NGASNMIAVTLADVLGGDVFLGFISAVAFATILAVVAGLAISGAGAI SHDLYVNVVIKK
GDVKHEDEMVRTKIATIAIGIFAILLIGIVFEKQNVAVTVGLAFAIAASVNFPIILLCI
YWKNLTTKGAFWGLLIGLIVLALVILSPSIWVKSFGFSEAI FYPYDHPALFSMPLSFI
LIYIISKLDNSKRAKDKKEGFEAQDFRAQSGVGVSEAVAH"
gene      complement(29917..30351)
          /gene="petJ"
          /locus_tag="DMACINML_00542"
CDS       complement(29917..30351)
          /gene="petJ"
          /locus_tag="DMACINML_00542"
          /inference="ab initio prediction:Prodigal:2.6"
          /inference="protein motif:HAMAP:MF_00594"
          /codon_start=1
          /transl_table=11
          /product="Cytochrome c6"
          /protein_id="Prokka:DMACINML_00542"
          /translation="MKKIALFFVLVCLLNLDKDKEWLPKGESISVY EYIPNNPRSP
AAFSSVDAKKNANQRKGGQVYSKWCIA CHGQGMPTNALSALYKDQGIPALLEDRTD
LSPDLVMIFVRYGKHSMPFFRKTEINDKELQYLGEYLGRNYK"
gene      complement(30348..32018)
          /gene="glcD_2"
          /locus_tag="DMACINML_00543"
CDS       complement(30348..32018)
          /gene="glcD_2"
          /locus_tag="DMACINML_00543"
          /inference="ab initio prediction:Prodigal:2.6"
          /inference="similar to AA sequence:RefSeq:CAL35328.1"
          /codon_start=1
          /transl_table=11
          /product="putative glycolate oxidase subunit D"
          /protein_id="Prokka:DMACINML_00543"
          /translation="MILPKNVSQSDFTA AVAKFEKALGKEWVFKTQEDLDLYRDAYSP
QWDDDDDEPIPSLALAPKNVEEVQAI VKIANEFKIPLFP ISTGKNLGYGSSAPQQRGQV
VVDLKR MNKIEVDDKRNFCIVEPGVSYFDLYEYVEKNNLNVFLDIPDPGWGSPLGNA
LDHGWGYSYGM YRDHFGSHCGMEVVLANGEILRTGMGALPKAKTFAENKYGYGPPYVDG
LFSQSNFGIVTKMGFWMPKPEHYMLLSIKMKKREDLIPAVEILNYLEDSFIVGW PQY
FSPLNPPYGKPMNAELKGYLTSKNGLPMDKIQNYALKNKIPYWNIDVSVYGCKEVCY
ANLEYIKQRFKII EGVDISIVQEFSLPLNLEQKKQLKHKVTLGIPNMEIFWLSTRGEA
LEPSDGHVWFSP IIPRDGKELLKQCQEVY MELFREFG EESPITPF SHPRSWMYRAFCFM
LAFNNSRTDKAHNLKVRKMYRQMVQTAAEHGWGDYRAAPT FQDDVMGAYSYNHILRR
FNEQLKDCIDPNGILAPGRGGIWPKNLRDERFVNNKRDALRMKEGKEK"
gene      complement(32015..32392)
          /locus_tag="DMACINML_00544"
CDS       complement(32015..32392)
          /locus_tag="DMACINML_00544"
          /inference="ab initio prediction:Prodigal:2.6"
          /codon_start=1
          /transl_table=11
          /product="hypothetical protein"
          /protein_id="Prokka:DMACINML_00544"
          /translation="MLEVSR RNFLKATALS AVCL SGLNASFL EFSQAKQVKYFIK DSE
IPYQENFINADEILLVEKDISNIY SKLKEAFENKALIGSVSSGTTFFVIRT MASDYGM
RVAYEKKQGFYTWILAPKGVKL"

```

gene complement(32564..34876)  
/gene="gyrB"  
/locus\_tag="DMACINML\_00545"

CDS complement(32564..34876)  
/gene="gyrB"  
/locus\_tag="DMACINML\_00545"  
/EC\_number="5.99.1.3"  
/inference="ab initio prediction:Prodigal:2.6"  
/inference="similar to AA sequence:RefSeq:CAL34184.1"  
/codon\_start=1  
/transl\_table=11  
/product="DNA gyrase subunit B"  
/protein\_id="Prokka:DMACINML\_00545"  
/translation="MQENYGASNIKVLKGLEAVRKRPGMYIGDTNIGGLHHMIYEVVD  
NSIDEAMAGHCDTIDIEITTEGSCIVSDNGRIPVDMHPTENMPTLTVVLTVLHAGGK  
FDKDTYKVSGLHGVGSVSNALS KKL VAVTVERNGEIYRQEFSEGVISEFGVIGKSK  
KTGTTIEFWPDDTIFEVTEFDYDILAKRFRELAYLNPKITINFKDNRVGKSESFHFEG  
GISQFVSDLNKKEALTKPIFFGVDEEDVNVEVALLYNDTYSENLLSFVNNIKTPDGGT  
HEAGFRMGLTRVISNYIEANASAREKDSKITGDDVREGLIAIVSVKVPPEQFEGQTKG  
KLGSSYVRPIVSKASFEYLSKYFEENPIEAKAIMNKALMAARGREAACKARELTRKKE  
SLSVGTLPKGLADCQSKDPSESEIYLVEGDSAGGSAKQGRERSFQAILPLRGKILNVE  
KARLDKILKSEIQNMITAFGCGIGEDFDLSKLRYHKIIMTDADVDGSHIQTLLLTFF  
FRFMNELVANGHIYLAQPPLYRYKKGQKKEIYKDEKALNDYLIETGIESSNYEGIG  
LNDLKDFLKIVAAYRSVLNELKKRFNVISVIRYLIENPDFIKENNEELFKIVKAFLEK  
EGHNILNHYINENEIRIYVQTENGLEELIINDDLFSHPLYEEANYIFNKIKDRDLSFE  
KDILDILDEVEKNAKKGAYIQRYKGLGEMNPEQLWETTMDPSVRRLLKITIEDAQSAN  
DTFNLFMGDEVEPRRDYIQTHAKDVKHLDV"

gene complement(34914..35981)  
/locus\_tag="DMACINML\_00546"

CDS complement(34914..35981)  
/locus\_tag="DMACINML\_00546"  
/inference="ab initio prediction:Prodigal:2.6"  
/inference="similar to AA sequence:RefSeq:ADT65433.1"  
/codon\_start=1  
/transl\_table=11  
/product="DNA polymerase III subunit beta"  
/protein\_id="Prokka:DMACINML\_00546"  
/translation="MKLSINKNTLESAVLLCNAYVEKKDSSITSHLLFEADEDKLI  
RASDFEIGINYKIRKIRVESGGFATANAKSIADVIKSLNNEEVVLETIDNFLFIRQKS  
TKYKLPFMNHEDFPNFPKTEGKNQFDIDSSDLRSRLKILPSIDTNNPKYSLNGAFLD  
IKTDRINFGVGTDRRLAVYTLEKANNQEFHISIPKKAIMEMQKLFYEKIEIYYDENML  
IAKNDNFEEFTKLINDKFPDYEKVIPKTFKQELKFSTEDFIDSLKKISVVTTEKMKLHF  
NKDKIIFEGISLDNMEAKTELEIETGVSEEFNLNIKIKYLLDFLTSIEEEQFTLSVNE  
PNLAFVVNSQGLSMVIMPIL"

gene complement(36146..37468)  
/gene="dnaA"

CDS complement(36146..37468)  
/gene="dnaA"  
/locus\_tag="DMACINML\_00547"  
/inference="ab initio prediction:Prodigal:2.6"  
/inference="similar to AA sequence:RefSeq:CAL34182.1"  
/codon\_start=1  
/transl\_table=11

```

/product="chromosomal replication initiator protein"
/protein_id="Prokka:DMACINML_00547"
/translation="MNPNQILENLKKELNENEYENYIAILKFNEKQSKADFLVFNAPN
ELLAKFIQTKYGKKISHFYEVQSGNKASVLIQAQSQKHSKSTKIDIAHIKAQSTILN
PSFTFESFVVGDSNKYAYGACKAISQKDKLGKLYNPIFIYGPSTGLGKTHLLQAVGNAS
LEMGKKVIYATSENFINDFTSNLKNGLDKFHEKYRNCVLLIDDVQFLGKTDKIQEE
FFFIFNEIKNNDGQIIMTSDNPPNMLKGITERLKSRAHGIIADITPPQLDTKIAIIR
KKCEFNDINLSNDIINYIATSLGDNIREIEGIIISLNAYANILGQEITLELAKSVMKD
HIKEKKENISIEDILSLICKEFNKPSDVKSSKKTQNVVTARRIAIYLARELTSLTFS
QLANFFVMKDHTAISHSVKIKELMEDDEQIKTKIEELKNKILTQSQS"
gene 37570..38046
      /gene="ruvC"
      /locus_tag="DMACINML_00548"
CDS 37570..38046
     /gene="ruvC"
     /locus_tag="DMACINML_00548"
     /inference="ab initio prediction:Prodigal:2.6"
     /inference="similar to AA sequence:RefSeq:ADN91856.1"
     /codon_start=1
     /transl_table=11
     /product="Holliday junction resolvase"
     /protein_id="Prokka:DMACINML_00548"
     /translation="MKILGIDPGSRNCGYAIIESNKGKNTLIEAGLIKIQPSTLQYQI
TELCEGLDLIFKNHSFDEVAIEDIFFAYNPKTVLKLAQFRGALSILKILQIHGDFAEYT
PLQVKKAVTGKAKATKEQVAFMVKRLGLSKDIKPLDITDAIAVALTHAANLRVRV"
gene 38240..40801
      /locus_tag="DMACINML_00549"
CDS 38240..40801
     /locus_tag="DMACINML_00549"
     /inference="ab initio prediction:Prodigal:2.6"
     /inference="similar to AA sequence:RefSeq:AJK83707.1"
     /codon_start=1
     /transl_table=11
     /product="flagellar hook protein FlgE"
     /protein_id="Prokka:DMACINML_00549"
     /translation="MMRSLWSGVSLQAHQVAMDVEGNNISNVNTNGFKYSRADFGTM
FSQTVKIATPTDGRGGQNPLQIGLGVSVSSTTRIHSQGSVQTTNSNTDVAINGDGGF
MVSDDGGLTNYLTRDGAFKLDAYGNFVNNSGFIVQGWNIWDDQTTIDSSRSPQNIFFID
PGMHIPAAKSTEVAIKANLNSGLNIGTSSRNLYALDSVHGYNNKTQRAEDENDTGTQTQ
FYTTSKNSVEVTEKGVDAAGSLFNASGTGLNLRDGGQIIVSYADAKYSTNKVGFASAFDA
NLQANQTAAFWGSADQVRVLDITLNGVKIQNAEIQNIDDAIAYINTFTAPTDRDGTG
VRAVKSADGSGIEFVNDNSDGTDDNMKNINLIVSDANTAGELWNATWNAGTSSFTFDQ
NNINKNNTSLWTADTMAPNPPNGNVTLTGTDREVITAHKYIYSSNPVDIGPMTNPDG
GPAFQPGANETTRPTDPASAAYWDAMNGGLLNTNARTFRTTEDLRELLQRDARYGVDY
DGSGSFAAADVNQAVKVVVTANGNFAISNAKEDSSVPPNAINGVADATTTTTPKAMSFN
ITAYSNKAGTVSTNDAFTAIFKAWDGPLTVGGSIKESQLKLSAFSAGLEIFDSLGSK
HTLEVQFVKQNTTQDGGNEWQMIIRVPEPAEINTTGEGPNNIIVGTARFNNDGSLASY
TPRTINFSPNNGAAPNQKIKLSFGTSGSNDGLVSSNSASTLTGQATDGYASGNLKPDA
IRVDEKGNLLGEFTNGKTFAVAKIAMASVANNSGLEEIGGNLFKVTANSNIVVGEAG
TGGRGEMKTSALEMSNVDLSRALTELIIRGYQANSKTIISTSDQMLQTLIQLKQ"
gene 41227..42498
      /gene="metB"
      /locus_tag="DMACINML_00550"
CDS 41227..42498

```

```

/gene="metB"
/locus_tag="DMACINML_00550"
/EC_number="2.5.1.49"
/inference="ab initio prediction:Prodigal:2.6"
/inference="similar to AA sequence:RefSeq:CAL35821.1"
/codon_start=1
/transl_table=11
/product="putative O-acetylhomoserine (thiol)-lyase"
/protein_id="Prokka:DMACINML_00550"
/translation="MNFTKETLALHGAYNFDTQRSISVPIYQNTAYNFENLDQAAARF
NLQELGNIYSRIGNPSTDVLGQRLANVEGGAFGIPVSSGMAACFYALVNASSGDNVA
YSNKIYGGTQTLISHTLKNFGIEAREFDIDDLDSLEKVIDQNTKAIFFESLSNPQIAI
ADIEKITQIAKKHKIATICDNTVATPFLLPFKYGVDIIVHSLSKYVSGQSALGGAL
IERKDLNDLLKNNDRYKAFNTPDPSYHGLNLTLDLPFISIRIITWLRDLGASLAPQ
NAWLLLQGLETLAVRIEKHSQNAEKVANFLNSHPDIKGVNYPTLTSNAYHNLFKKYFD
KNFASGLLSFEARDYEHARRICDKTQLFLLAANLGDSKSLIIHPASTTHSQLSEELQ
KAGIKKTTVRLSIGLENSDDLIADLKQAIES"
gene 42510..43544
/locus_tag="DMACINML_00551"
CDS 42510..43544
/locus_tag="DMACINML_00551"
/inference="ab initio prediction:Prodigal:2.6"
/inference="similar to AA sequence:RefSeq:ABS44543.1"
/codon_start=1
/transl_table=11
/product="inner membrane protein YeeE"
/protein_id="Prokka:DMACINML_00551"
/translation="MLSGIIVGLLLGFVLQRGRFCVVGAYRDVFLSKKFTIFIALFIV
VALQSIGVWALHSLGYISIKPQEFYWLSTIIGGIIFGFGMVIAGGCATGTWYRAGEGL
IGSIAALLFYAFSASAVKYGVLLPLQDNLNTFKISDGTIFYQSLGISPWILVVLVLSLVV
GFFVIKELRKPRLLKVARLKPRKQGISHILFEKSWHPFVTAVLVALIATLAWPLSSLSG
RNYGLGITTPSANLVQYLSTGDIQFVDWGVFLVLGIALGSFLGAKLSGEFRFRLLPDKK
TLAYASIGGILMGVGASLAGGCTIGNGLVETSLFSYKGWVATVFFLIGAYIATFYTII
LPTRKATQKI"
gene 43554..43775
/locus_tag="DMACINML_00552"
CDS 43554..43775
/locus_tag="DMACINML_00552"
/inference="ab initio prediction:Prodigal:2.6"
/inference="similar to AA sequence:RefSeq:ABS43826.1"
/note="conserved domain protein"
/codon_start=1
/transl_table=11
/product="hypothetical protein"
/protein_id="Prokka:DMACINML_00552"
/translation="MVTLDTRGKVCPPFLVEAKNLVQTLKSGEELIILFDCTQATETI
PQWAAEEGHEIVDFELLGDAEWRIKLIKK"
gene 43786..44667
/gene="metaA"
/locus_tag="DMACINML_00553"
CDS 43786..44667
/gene="metaA"
/locus_tag="DMACINML_00553"
/inference="ab initio prediction:Prodigal:2.6"

```

```

/inference="similar to AA sequence:RefSeq:AVL46551.1"
/codon_start=1
/transl_table=11
/product="homoserine O-succinyltransferase"
/protein_id="Prokka:DMACINML_00553"
/translation="MPLIIPENIPAYELLKEHAFIMGSRRRAKHQDIRPQEILIIINLMP
KKIETENQILSLLANSPLQVNITLLATTSYVGKNTPFTHLEKFYKGLEEVKKRKFDDGA
IVTGAPVEQMDFEKVAYWEELLEIFDFLQQNVTSYICWGAMAALKHFYGVDKIALD
KKIFGIYKHDKVSPDLLLTLNDEKVLMPHSRHSSMDEEQISALQKQGLKVLRLNKKI
GSALLRDEKNIFILGHLEYFKDTLHQEYVRDNFIQKAKNYYDKKGNIKYNWRSNANTI
FANWLNVDVYQSTPFVL"
gene complement(44672..45271)
/locus_tag="DMACINML_00554"
CDS complement(44672..45271)
/locus_tag="DMACINML_00554"
/inference="ab initio prediction:Prodigal:2.6"
/inference="similar to AA sequence:RefSeq:CAL35819.1"
/codon_start=1
/transl_table=11
/product="putative periplasmic protein"
/protein_id="Prokka:DMACINML_00554"
/translation="MKKSIVIIGGSVAGLSAALFFASAKNDELDFDITIFDDDKADLK
AAAIYNVPFFPKGAKADEIYTHIKAQIASMLEVKYIDSKVVSISGEKGDFTVSDEQGL
GIKADYIIVATGATKSEIKGLEDFVIPHELMPPKPNKFCFKHHGRQMIKEGIYAAGLAS
GVTTMVACAMGSANEAACAILSDIKGVVSVYHDTPTTRN"
sig_peptide complement(45089..45271)
/locus_tag="DMACINML_00554"
/inference="ab initio prediction:SignalP:4.1"
/note="predicted cleavage at residue 61"
gene 45430..45813
/locus_tag="DMACINML_00555"
CDS 45430..45813
/locus_tag="DMACINML_00555"
/EC_number="3.5.4.16"
/inference="ab initio prediction:Prodigal:2.6"
/inference="similar to AA sequence:RefSeq:CAL35818.1"
/codon_start=1
/transl_table=11
/product="putative GTP cyclohydrolase I"
/protein_id="Prokka:DMACINML_00555"
/translation="MRYGEKEIKEFDVENMEIWPNDKNDYIIKITLPEFMCCPRSG
YPDFATIYLEYIPDQFVVELKAIKLYINTFMHRNVSHEASINEIYNTLKDCLKPKWIK
VVGDFNPRGNVHTVIECRSDMVVPE"
gene 45810..46607
/gene="hindIIIM"
/locus_tag="DMACINML_00556"
CDS 45810..46607
/gene="hindIIIM"
/locus_tag="DMACINML_00556"
/EC_number="2.1.1.72"
/inference="ab initio prediction:Prodigal:2.6"
/inference="similar to AA sequence:RefSeq:CKH09182.1"
/codon_start=1
/transl_table=11

```

```

/product="Modification methylase HindIII"
/protein_id="Prokka:DMACINML_00556"
/translation="MKFNLDLNNWKS CDINTDSLWLISSRDKSGKHRNIYHG NFI PQ
IPNQLIRRYTKKDDLIIDPFLGSGTTLYECEKLNRCIGLDINESILEFVLDFNGINF
DNKRYFLGNC DNTDAKKVDEFLENALNKLESKKAQFIFLHPPYMDIVKFSEKKEDLSQ
ISDLKKFKDKFLFTCQNMLKYLEKSR YFALVIADLYRNSEIVPLGFELMNLIKQNFKV
KLGIIIVKNI EGNRGKLGINAIWRYRALRS DYYIFKHEYIFVFKKEF"
gene 46608..47687
      /locus_tag="DMACINML_00557"
CDS 46608..47687
     /locus_tag="DMACINML_00557"
     /inference="ab initio prediction:Prodigal:2.6"
     /inference="similar to AA sequence:RefSeq:ATM02703.1"
     /note="DUF262 domain-containing protein"
     /codon_start=1
     /transl_table=11
     /product="hypothetical protein"
     /protein_id="Prokka:DMACINML_00557"
     /translation="MDLEIQMEDKRNLLRADRLDMSFGEIISNYEEDNLI IQPSYQRS
FRWNDYQKTRFIESVLLGIPPIFVAEDKDN GKWELIDGLQRVSTILSFFGLLKENG
KIDDRLNKFKLLEGEILTELKDKNIDSFPLK LQLTIKRFVCRVEILRWDTNSEIKYQL
FSRLNTGGEALKEQEIRNCIYRGDLNDL INNLAENKDFKDVIGATERQEKEYLSELV
LRFMAFYRHN DLIFKTSGSIQGF LSDFMRSNMEKNQDDFYQVKQVFLNVISYLNENK
LSDLFRDNRARQFNANHYDTIMYILAKNLNRFQDSQEF RQIIQNL LKNKEYIDKSGSS
TYATKRMQE KIKFAEEFIKNEFTRN"
gene 47668..48303
      /locus_tag="DMACINML_00558"
CDS 47668..48303
     /locus_tag="DMACINML_00558"
     /inference="ab initio prediction:Prodigal:2.6"
     /codon_start=1
     /transl_table=11
     /product="hypothetical protein"
     /protein_id="Prokka:DMACINML_00558"
     /translation="MSLQEINEELLQEFRWRCDEMILLRDIVDSCEKDEYQKFILKMS
IPIIYAHLEGFIVSACKIVLQYLNTLKLSSNDCSEKFIMMAFDKDIKSLSDSQHLEKK
IKHFCRIQEKL LKQKFETKVNKSNLTFEVLENLCLKFDISSVKLKDYKDILDQLVN
IRNAIAHGENSYNFQNF GDIEKYIDLFEALCLDFYQVLFNILEDEKYKKEK"
gene 48306..48980
      /locus_tag="DMACINML_00559"
CDS 48306..48980
     /locus_tag="DMACINML_00559"
     /inference="ab initio prediction:Prodigal:2.6"
     /inference="similar to AA sequence:RefSeq:CKH09127.1"
     /codon_start=1
     /transl_table=11
     /product="hypothetical protein"
     /protein_id="Prokka:DMACINML_00559"
     /translation="MDIPFKEGTANY YDFTIMSDLQWHCTKCELKAAQAKTWQTRHQ
GIQLDTDEKGNFYKMLCCKCNMNTVHRKLSLEILEDTKTRSGISVSLARRIKNCLR
NEEAIYLREMPNELEIDHKFPQIRWKTDES KNDGSMSEEEIKNKFILLTRSNLLKS
RYCEKCFKNGTRGYFPGIKFWYKGNEKWQGEDDNDEKCEGCFWYDPYKWREELNRIS
QIQINL"
gene 48977..49984

```

/gene="fokIM\_2"  
 /locus\_tag="DMACINML\_00560"  
 CDS 48977..49984  
 /gene="fokIM\_2"  
 /locus\_tag="DMACINML\_00560"  
 /EC\_number="2.1.1.72"  
 /inference="ab initio prediction:Prodigal:2.6"  
 /inference="similar to AA sequence:RefSeq:CKH09081.1"  
 /codon\_start=1  
 /transl\_table=11  
 /product="D12-class N6-adenine-specific DNA  
 methyltransferase"  
 /protein\_id="Prokka:DMACINML\_00560"  
 /translation="MNYIGSKFKLSSFLFKSIDETLKAKNKALEDICFCDIFAGTSAV  
 GKLFKTKVKQVIANDKEFYFILAKNYIQNSLLTRANELIDILNYQIPLIKNKIYKY  
 YAIGGGENRQYFSDLNAMKIDSIRVQIEIWKEQNFINKEEYFLLASLLESADKVANT  
 ASVYGAF LKHLKKSQAQKMMVLFPAEFQQSHNKHQVFNKNANELIREIKGDILYLDPPY  
 NNREYGANYHVLNTIAIYDDFIPQGKTGLRAYEKSAWCKKNLVFNALEDLIKNNANFKF  
 IFLSYNDEGLLSLEQIKQIFKQYKGYDLKNQIYKRFKADSSRICKQDQTIIEYLHILEK  
 K"  
 gene 50063..50707  
 /locus\_tag="DMACINML\_00561"  
 CDS 50063..50707  
 /locus\_tag="DMACINML\_00561"  
 /inference="ab initio prediction:Prodigal:2.6"  
 /inference="similar to AA sequence:RefSeq:CAL35815.1"  
 /codon\_start=1  
 /transl\_table=11  
 /product="putative outer membrane protein"  
 /protein\_id="Prokka:DMACINML\_00561"  
 /translation="MNKLLSIIAGVALFSSSALAAEESGFFIGADAAYVQTKVKGDL  
 KHNKTGAVFNGDLSSSIPILGLRMGYRFNDLHRLYAAYNYSDEFSDIIRTPNLRIEGD  
 FNTHKFLGDFTPEIFKRVRAVAGGYLGYAKTSLDLKTSLLSLSQDFDGFVYGAKIG  
 AIFELGTSNELEVGFKAQIEYNTRNYQETIGSNFYDPRQNTNYGLYLGITYKF"  
 sig\_peptide 50063..50128  
 /locus\_tag="DMACINML\_00561"  
 /inference="ab initio prediction:SignalP:4.1"  
 /note="predicted cleavage at residue 22"  
 gene complement(50731..51360)  
 /locus\_tag="DMACINML\_00562"  
 CDS complement(50731..51360)  
 /locus\_tag="DMACINML\_00562"  
 /inference="ab initio prediction:Prodigal:2.6"  
 /inference="similar to AA sequence:RefSeq:CAL35814.1"  
 /note="hypothetical protein Cj1720"  
 /codon\_start=1  
 /transl\_table=11  
 /product="hypothetical protein"  
 /protein\_id="Prokka:DMACINML\_00562"  
 /translation="MLKELLEIKKEMEPVIHEANVKLNVLAREVIVRRKEYEYIGPMV  
 DRVYLDNAIYVKVMSSGRDVKTDNVPIKTFYMFVVAPEKESTKDIKNKLVAYEGLD  
 NTFIATLIRSCQRFKEIISKQATLSKASKMNVLIKTNLGEASSAIKFNITIEYTKEN  
 QKLTRDNSKSAGSFRDTRTYINLVVDKNTDSQICEKLLDDVERYFIGGG"  
 gene 51697..53232

CDS /locus\_tag="DMACINML\_00563"  
 51697..53232  
 /locus\_tag="DMACINML\_00563"  
 /inference="ab initio prediction:Prodigal:2.6"  
 /inference="similar to AA sequence:RefSeq:APA51564.1"  
 /codon\_start=1  
 /transl\_table=11  
 /product="2-isopropylmalate synthase"  
 /protein\_id="Prokka:DMACINML\_00563"  
 /translation="MKNNKIIIFDTTLRDGEQALGSSLNINQKLQIALALENLGVDVI  
 EAGFPVSSQGDFAVKNIASKVKNSTICALSRALDKDIDTAYEALKVADSFRIHTFIA  
 TSTLHIQDKLKKDFDEILAMAQRAIARARNYTDDVEFSCEDAGRTPIDNLCFMVENAI  
 KAGARTINIPDTVGYTLPSEFANIILFNKVPNIDKAVISVHCHNDLGMATGNSLSA  
 ILQGARQIECTMNGLGERAGNCALEEVMAIKTRSDYLKGFYTDIKCENISKTSKLV  
 AITNESIPSHKAIVGSNAFSSGSIHQDGV LKNRQTYEIISSPSSIGLHENRMLMTARS  
 GRAMIKTCLDNLGYDEKTYNLDEVYESFLRLADKKGQVYDYDLEALMFLSYENDEENE  
 LVLEKLSVISGTIPTACVCVRIKEELKTEACTGNGPIEAVFNCISRITGLNPVLKAYS  
 INAKSSGVDAQGQVDVDFEFKGRKFHGKGLSTDVIEASAQAFISAYNAIYRSLKVEER  
 KAV"

gene 53229..54305  
 /gene="leuB"

CDS 53229..54305  
 /gene="leuB"  
 /locus\_tag="DMACINML\_00564"  
 /EC\_number="1.1.1.85"  
 /inference="ab initio prediction:Prodigal:2.6"  
 /inference="similar to AA sequence:RefSeq:CAL35812.1"  
 /codon\_start=1  
 /transl\_table=11  
 /product="3-isopropylmalate dehydrogenase"  
 /protein\_id="Prokka:DMACINML\_00564"  
 /translation="MNTYKIAVLPGDGIGPSVMKEALKILNFVAQKHGFKLETKEAKI  
 GGASIDAYGVALSDETLKLCEQSDAILFGSVGGPKWDNLPIDQRPERASLLPLRKHFN  
 LFANLRPCKIYESLRHASPLKDEIIQKGV DILCVRELTGGIYFGKQELGKESAYDTEI  
 YTKAEIERITRLAFESARIRNKKVHLIDKANVLASSILWRDVGQIAKEYEDIKLEYM  
 YVDNAAMQIIKNPSTFDVMLCSNLFGDILSDELA AISGSLGLLCSASLNDKGFGLYEP  
 AGGSAPDIAHLNIANPIAQILSAALMLKYSFKEEKA AQDIENAI AIALERGMKTKDLN  
 ANSYLSTDEMGDCIVEILKENNNG"

gene 54298..55704  
 /gene="leuC"

CDS 54298..55704  
 /gene="leuC"  
 /locus\_tag="DMACINML\_00565"  
 /EC\_number="4.2.1.33"  
 /inference="ab initio prediction:Prodigal:2.6"  
 /inference="similar to AA sequence:RefSeq:CAL35811.1"  
 /codon\_start=1  
 /transl\_table=11  
 /product="3-isopropylmalate dehydratase large subunit"  
 /protein\_id="Prokka:DMACINML\_00565"  
 /translation="MAKTLYEKVFD SHVVYQKENELPILYIDRHLIHEVTSPQAFSGL  
 KMANRKMARSDLTLATIDHDVSTKSTDL DACSGMAKEQITTLMQNTKEFGVRLGLGD



KNQGIVHIVSPELGFTLPGVTLVCGDSHTATHGAFGALAFGIGTSEVEHVMATQTLKQ  
 AKLKTMKIECKGFQKGVYAKDLILYLI AKYGTAKGTGYAIEFCGELIESLSMEARMT  
 LCNMAIEFGAKVGMIAPEITFEYIKGKEFAPKGEEFEKHCEYWRSLKSDEGAQYDES  
 IVLDVSQIQPQISYGTNPSQVIAINERIPKVSDFSNPSDQKSLLDALDYVNLEQDQSL  
 EGVKIDIVFIGSCTNGRLEDLKIAADILKGRKIHKDVKALIVPGSMQVRKEAENLGLD  
 KIFIEAGCEWRYAGCSMCLGMNDDKASAGQRVASTSNRN FVGRQGKGSITHLMSPASA  
 AACAIIEGFICDNRKYLGV"

gene 55706..56308  
 /gene="leuD"  
 /locus\_tag="DMACINML\_00566"

CDS 55706..56308  
 /gene="leuD"  
 /locus\_tag="DMACINML\_00566"  
 /EC\_number="4.2.1.33"  
 /inference="ab initio prediction:Prodigal:2.6"  
 /inference="similar to AA sequence:RefSeq:CAL35810.1"  
 /codon\_start=1  
 /transl\_table=11  
 /product="3-isopropylmalate dehydratase small subunit"  
 /protein\_id="Prokka:DMACINML\_00566"  
 /translation="MQKFTTHKGIACPLEYANIDTDQIIPKQFL LAVSKQGF GKHLFH  
 DLRYLDDKESVLNMFNFKKEYQNASILVSFENFGSGSSREHAPWALVDYGIRAIIA  
 PSFADIFKNNALGNLLTIELAKDEVVSIKQLKESEDKNIEISLFEKKVFFKDQVFS  
 FDLDEFRRTCLEGLDNIALTLKYEEQIKAYEKNSKSFV"

gene complement(56288..56818)  
 /locus\_tag="DMACINML\_00567"

CDS complement(56288..56818)  
 /locus\_tag="DMACINML\_00567"  
 /inference="ab initio prediction:Prodigal:2.6"  
 /inference="similar to AA sequence:RefSeq:ADN91846.1"  
 /codon\_start=1  
 /transl\_table=11  
 /product="Acetyltransferase, GNAT family"  
 /protein\_id="Prokka:DMACINML\_00567"  
 /translation="MQDFVIEKATQKDLKSILNIAKDALNSMKAMNFNQWDENYPNEE  
 IFKEDIKTQELYLCKEKDEILGFICINEKFEPEFYEQINFKKSVDNQA FYLHRLAVKE  
 NAKGKGVAQKLLNFCETYAKNEGKYS LRADTHSKNIPMNSLFKKNLF EFCGAFHIPCY  
 EDEF LAYEKILNQKAF"

gene complement(57045..57120)  
 /locus\_tag="DMACINML\_00568"

tRNA complement(57045..57120)  
 /locus\_tag="DMACINML\_00568"  
 /product="tRNA-Val"  
 /inference="COORDINATES: profile:Aragorn:1.2"  
 /note="tRNA-Val(gac)"

gene complement(57122..57197)  
 /locus\_tag="DMACINML\_00569"

tRNA complement(57122..57197)  
 /locus\_tag="DMACINML\_00569"  
 /product="tRNA-Ala"  
 /inference="COORDINATES: profile:Aragorn:1.2"  
 /note="tRNA-Ala(ggc)"

gene complement(57331..58296)  
 /locus\_tag="DMACINML\_00570"

CDS complement(57331..58296)  
 /locus\_tag="DMACINML\_00570"  
 /inference="ab initio prediction:Prodigal:2.6"  
 /inference="similar to AA sequence:RefSeq:ADT73490.1"  
 /codon\_start=1  
 /transl\_table=11  
 /product="lipopolysaccharide core biosynthesis protein LpsA"  
 /protein\_id="Prokka:DMACINML\_00570"  
 /translation="MLQSRLFMNLKGIGISFISRYFFQTNLHKIFNKILKYNVKELEE  
 IQTRVKYYNQINDFFTLTEKEKIGKFPFKNTSYAFDAYEISKYFNNDFLWNKKFGDIK  
 YTFKEPTICKSRPLENNANNILLKLDKNRHFCFLKDNINYENKRNIAIFRGAVYQKHR  
 KEFFHSYFNKPFCDLGDTSKQLSQWKKNFLSKKEEQMKYKFIISLEGNDVASNLKWAMN  
 SNSLVLAPKITCETWFMEGTLKPNYHFALIDNDLATVIEYFNNHPKDALEIINNAHQ  
 YIKKFVDKKKEFYIGILVLTIFYFYSGQLDLNKDECEREILELIK"

gene complement(58407..58494)  
 /locus\_tag="DMACINML\_00571"

tRNA complement(58407..58494)  
 /locus\_tag="DMACINML\_00571"  
 /product="tRNA-Ser"  
 /inference="COORDINATES: profile:Aragorn:1.2"  
 /note="tRNA-Ser(gga)"

gene 58599..58675  
 /locus\_tag="DMACINML\_00572"

tRNA 58599..58675  
 /locus\_tag="DMACINML\_00572"  
 /product="tRNA-Met"  
 /inference="COORDINATES: profile:Aragorn:1.2"  
 /note="tRNA-Met(cat)"

gene complement(59116..59220)  
 /locus\_tag="DMACINML\_00573"

CDS complement(59116..59220)  
 /locus\_tag="DMACINML\_00573"  
 /inference="ab initio prediction:Prodigal:2.6"  
 /inference="similar to AA sequence:RefSeq:SQE25200.1"  
 /codon\_start=1  
 /transl\_table=11  
 /product="small hydrophobic protein"  
 /protein\_id="Prokka:DMACINML\_00573"  
 /translation="MTALDIFQIIFIFVVLIGFVGMIVISKDKSNR"

gene complement(59217..60287)  
 /locus\_tag="DMACINML\_00574"

CDS complement(59217..60287)  
 /locus\_tag="DMACINML\_00574"  
 /inference="ab initio prediction:Prodigal:2.6"  
 /inference="similar to AA sequence:RefSeq:CAL35807.1"  
 /codon\_start=1  
 /transl\_table=11  
 /product="putative radical SAM domain protein"  
 /protein\_id="Prokka:DMACINML\_00574"  
 /translation="MKELINILDFLPEELEEKIKPMFRVKQIYQWIYQKYANNFSDMS  
 SLPKDLRLELAQTYHFAPLKCVKNEQSKDGSIKYLFELIDGLRIESVLLPMKEEQFDD  
 EGKRISHTRYTICVSSQVGCKSGCSFCLTAKGGLKRNL SAGEIVGQILWIKKQNNIPY  
 ERRVNIIVYMGMEPLDNLKNVSKAVKILSQNDGLAISPRRQTISTSGLAKQIKELGEM"

```

NLGVLLAISLHAVNDELRTTELMPIKAYNIAAIMDAVRAFPIDQRKRVMEFYLLIDGI
NDKLEHAKELVKLLNGIKAKVNLILFNPHEGSIYHRPKLENAIKFQDLLSAKGVTCTI
RESKGLDISAACGQLKERAKEL"
gene      complement(60307..60843)
          /locus_tag="DMACINML_00575"
CDS      complement(60307..60843)
          /locus_tag="DMACINML_00575"
          /inference="ab initio prediction:Prodigal:2.6"
          /inference="similar to AA sequence:RefSeq:CAL35806.1"
          /note="hypothetical protein Cj1712"
          /codon_start=1
          /transl_table=11
          /product="hypothetical protein"
          /protein_id="Prokka:DMACINML_00575"
          /translation="MIVCAGGNENFSFAKAIGIGLIESTFHLTQLCLKEKPSKLVFIG
TCGLYDKGEILGIYKSSHACNIEFSYISDQFYTPANIEIKLNNQNVSRITIKVNSSNY
ICQNSQAAKEFAKLGFFAENMEAFSVLSVAKNLDIDAECILCATNFCNENAHEDFIKN
HQAKEKLEEYLKINHYI"
gene      60929..61723
          /gene="ksgA"
          /locus_tag="DMACINML_00576"
CDS      60929..61723
          /gene="ksgA"
          /locus_tag="DMACINML_00576"
          /EC_number="2.1.1.-"
          /inference="ab initio prediction:Prodigal:2.6"
          /inference="similar to AA sequence:RefSeq:CAL35805.1"
          /codon_start=1
          /transl_table=11
          /product="putative dimethyladenosine transferase (16S rRNA
dimethylase)"
          /protein_id="Prokka:DMACINML_00576"
          /translation="MMKAKKHYGQNFLNDKSILSKIIQAIPKDTENIVEIGPGLGDLT
QELLKVSHVKAYEIDDDLIPILRKKFQKELECGKLNLLHQDASKLAYFDEKKYFLVAN
LPYYVASHLILQALEDKNCSGLIVMVQKEMALKFCAHSGESDFSALGVLSAMICEREI
LFDVEPECFNPPPKVVSAMKMIKFRAYQDICEIHAFKAFKDCFKAPRKQLLGNLKN
YKAELAEVFQELKLNLRPHEL CVDSYLKIYEKVKEEYERKQQRK"
gene      61698..63728
          /locus_tag="DMACINML_00577"
CDS      61698..63728
          /locus_tag="DMACINML_00577"
          /inference="ab initio prediction:Prodigal:2.6"
          /inference="similar to AA sequence:RefSeq:CAL35804.1"
          /codon_start=1
          /transl_table=11
          /product="putative metallo-beta-lactamase family protein"
          /protein_id="Prokka:DMACINML_00577"
          /translation="MNENKGNSENTNIPNSNSKNNKRYKYRNRKRLADSIENSQN
STHEFSNNEKINTKKNSTNTQPLESENIEKPKSEKKKRNRLPSKLTGNEDWQIALAE
CIEANRVSHENRLHPLKYNNSSEHKIRITPLGGLGEIGGNISVFETNNDAIIDIGMS
FPDGMTMGVDIIIPDFDYVRKIKDKIRGIVITHAHEDHIGAVPYFFKEFQFPIYATPL
ALGMISNKFEEHGLKAERKWRPVEKRKVEIGEFDIEWIHITHSIIDASALAIKTKA
GTIIHTGDFKIDQTPIDGYPTDLGRLAHYGEGLVCLLSDSTNSYKEGYTKSESSVGP
TFDQIFARTKGRVIMSTFSSNIHRVYQAITYGLKYGRKVCVIGRSMERNLYTTMELGY

```

IKLDRKIFIDAEVSKYKDNEVLIVTTGSQGETMSALYRMATDEHKFIKIKPSDQIII  
SAKAIPGNEASVAVLDYLLKAGAKVAYQEFSEIHVSGHASIEEQKMLTLVKPKFFL  
PVHGEYNHINKHKETAIKCGIPEKNIYLMSDGDQVELCQKYIKRVKTVKTGKVFVDNQ  
INKQIADDVVIDRQKLADSGIVVIAQLDKASKTLINKPRVFSYGLVADKQDHAFSKE  
MAEVLGQFFVNVKDEVLNDPRFLENQIRQVLRKHIFRKIKKYPTIVPTIFVM"

gene 63770..64531  
/locus\_tag="DMACINML\_00578"

CDS 63770..64531  
/locus\_tag="DMACINML\_00578"  
/EC\_number="4.2.1.70"  
/inference="ab initio prediction:Prodigal:2.6"  
/inference="similar to AA sequence:RefSeq:CAL35803.1"  
/codon\_start=1  
/transl\_table=11  
/product="putative ribosomal pseudouridine synthase"  
/protein\_id="Prokka:DMACINML\_00578"  
/translation="MRINKFISHNSPYSRREADELIKQGLVKINNKIALLSDEVKTND  
KVFVKGKALRKKTKQFSVYIYHKQKGEIVSKRDDRGRKTIYDTLPKQFNTWLSVGRLLDF  
ASEGLLLTDSPIAHALMNSDLEREYLLKLVINKQVIEAMQNGLEIKNEKKGGAHA  
KTKITSMSFAPFLDFEIFGTSGGYTKLRVIINEGKNRELRRFFGHFDLEVMDLKRVAF  
GALDLGMLKAGKHRYLENGEYEKLRDFLKVNNIYY"

gene 64786..65097  
/gene="rpsJ"

CDS 64786..65097  
/gene="rpsJ"  
/locus\_tag="DMACINML\_00579"  
/inference="ab initio prediction:Prodigal:2.6"  
/inference="similar to AA sequence:RefSeq:CAL35802.1"  
/codon\_start=1  
/transl\_table=11  
/product="30S ribosomal protein S10"  
/protein\_id="Prokka:DMACINML\_00579"  
/translation="MERIRLKLKAYDHRVLDRTVA AIVEAVKRTGADIRGPIPMPTKI  
KRYTVLKSPHINKDSREQFEIRIHARMLDIVAATPDTVDSLTKLDLAPEVSVEVRAMG  
K"

gene 65107..65682  
/gene="rplC"

CDS 65107..65682  
/gene="rplC"  
/locus\_tag="DMACINML\_00580"  
/inference="ab initio prediction:Prodigal:2.6"  
/inference="similar to AA sequence:RefSeq:CAL35801.1"  
/codon\_start=1  
/transl\_table=11  
/product="50S ribosomal protein L3"  
/protein\_id="Prokka:DMACINML\_00580"  
/translation="MEYIVEKIGMSRTIANPSIAVTLLRVVNAKVCEVDNGKAIWAYS  
KGKVNKCVAGQKKYNLSAEFNR FATLEVANTEAGDLDETPLNEAKVLKVSFNTKGR  
GYSVGMKRHNFAAGGPASHGSRFHRRHGSIGNREWPGRVQPGMKMAGHYGNTKVTVKNE  
VVSYDAENKILVVKGAVPGYNGAMGKIRIAK"

gene 65679..66293  
/gene="rplD"

CDS /locus\_tag="DMACINML\_00581"  
 65679..66293  
 /gene="rplD"  
 /locus\_tag="DMACINML\_00581"  
 /inference="ab initio prediction:Prodigal:2.6"  
 /inference="similar to AA sequence:RefSeq:CAL35800.1"  
 /codon\_start=1  
 /transl\_table=11  
 /product="50S ribosomal protein L4"  
 /protein\_id="Prokka:DMACINML\_00581"  
 /translation="MSKVVLNDKLEKAGELELPAKYAEVNPVPHNLYLVKSYLASLRA  
 NTAHTKGRSDVSGGKPKWRQKGRGGARAGSTRTNVWVGAVAFGPTNERNYQKVNK  
 KQKRLALERALADKAAKALFTADSLAIESGKTKDANAVIKKLGVKDALIVKDLLDEK  
 TLLAYRNLANCYVVDISEVNAYLISVFNAVIIIEKSALESITKEG"

gene 66296..66577  
 /gene="rplW"  
 /locus\_tag="DMACINML\_00582"

CDS 66296..66577  
 /gene="rplW"  
 /locus\_tag="DMACINML\_00582"  
 /inference="ab initio prediction:Prodigal:2.6"  
 /inference="similar to AA sequence:RefSeq:CAL35799.1"  
 /codon\_start=1  
 /transl\_table=11  
 /product="50S ribosomal protein L23"  
 /protein\_id="Prokka:DMACINML\_00582"  
 /translation="MADITDIKTILYTEKSLNLQEQGVVVIQTSPKMTKTGLKAVLKE  
 YFGVTPQSINSLRMDGKVKRFRGRLGQRNDYKKFYVKLPEGVSLESMEA"

gene 66579..67409  
 /gene="rplB"  
 /locus\_tag="DMACINML\_00583"

CDS 66579..67409  
 /gene="rplB"  
 /locus\_tag="DMACINML\_00583"  
 /inference="ab initio prediction:Prodigal:2.6"  
 /inference="similar to AA sequence:RefSeq:CAL35798.1"  
 /codon\_start=1  
 /transl\_table=11  
 /product="50S ribosomal protein L2"  
 /protein\_id="Prokka:DMACINML\_00583"  
 /translation="MAIKTYKPYTPSRRYITGLSSEDITAKPSVRSLLVKLPAHAGRN  
 SYGRITSRHKEAGAKLYRIIDFKRRKFGIEGKVEAIEYDPYRNCRIALISYKDGEKR  
 YILQPRGLSVGDIVAAEAESGLDIKPGNAMKLNIPVGTIVHNVELKPGKGGQMIRSAG  
 AYAQLMGKEEKYVILRLASGEMRQVLAECMASIGEVGNEEWANVTIGKAGRNRHRGIR  
 PQTRGSAMNPVDHPHGGGEGKNSGRHPVTPWGKPTKGAKTRRKKASDKLIISRRKGGK  
 "

gene 67411..67692  
 /gene="rpsS"  
 /locus\_tag="DMACINML\_00584"

CDS 67411..67692  
 /gene="rpsS"  
 /locus\_tag="DMACINML\_00584"  
 /inference="ab initio prediction:Prodigal:2.6"  
 /inference="similar to AA sequence:RefSeq:CAL35797.1"

```

/codon_start=1
/transl_table=11
/product="30S ribosomal protein S19"
/protein_id="Prokka:DMACINML_00584"
/translation="MARSLKKGPFVDDHVMKKVIAAKKANDNKPIKTWSRRSTIIPDM
IGLTFNVHNGKSFIPVYITENHIGYKLGEFAPTRTFKGHKGSVQKKIGK"
gene 67703..68110
/gene="rplV"
CDS  /locus_tag="DMACINML_00585"
67703..68110
/gene="rplV"
/locus_tag="DMACINML_00585"
/inference="ab initio prediction:Prodigal:2.6"
/inference="similar to AA sequence:RefSeq:EAQ72756.1"
/codon_start=1
/transl_table=11
/product="ribosomal protein L22"
/protein_id="Prokka:DMACINML_00585"
/translation="MSKALIKFIRLSPTKARLIAREVQGMNAELAMASLKFMPNKGAK
YIANAISSAVANGGFEANEVVKSCRVDAGAVLKRFRPRARGSASRIRKPTSHILVEV
AKMEVKTEAKKAVAKTPVKKTSTKKVTAEKES"
gene 68110..68811
/gene="rpsC"
CDS  /locus_tag="DMACINML_00586"
68110..68811
/gene="rpsC"
/locus_tag="DMACINML_00586"
/inference="ab initio prediction:Prodigal:2.6"
/inference="similar to AA sequence:RefSeq:CAL35795.1"
/codon_start=1
/transl_table=11
/product="30S ribosomal protein S3"
/protein_id="Prokka:DMACINML_00586"
/translation="MGQKVNPIGLRLGINRNWESRWFPTKANLVENIGEDYKIRAFK
RKLYYAGISQILVERTAKKLRVTVVAARPGIIIGKKGSDVDNLRKELQDLIGKDVNIN
IKEERKAGASAQLAESVATQLEKRIAFRRAMKKVIQGAQKAGAKGKIVSVSGLGGA
EMARTEWYLEGRVPLHLTLRAKIDYGF AEARTTYGNIGVWVIFKGEVLQKGLQAEKTE
ESAPAKKQRRTRRSK"
gene 68814..69239
/gene="rplP"
CDS  /locus_tag="DMACINML_00587"
68814..69239
/gene="rplP"
/locus_tag="DMACINML_00587"
/inference="ab initio prediction:Prodigal:2.6"
/inference="similar to AA sequence:RefSeq:CAL35794.1"
/codon_start=1
/transl_table=11
/product="50S ribosomal protein L16"
/protein_id="Prokka:DMACINML_00587"
/translation="MLMPKRTKYRKMMKGRNRGYANRGTEFTFGFALKATEAGRINS
RQIEAARIALTRFVKRQGTWIRVFPDKPLTKKPLETRMGKGGKGAVEEWMNIKPGRI
IYEMAGVSEEMAREALTLAMHKLPFKTKFVTRESQNEIY"
gene 69226..69411

```

/gene="rpmC"  
 /locus\_tag="DMACINML\_00588"  
 CDS 69226..69411  
 /gene="rpmC"  
 /locus\_tag="DMACINML\_00588"  
 /inference="ab initio prediction:Prodigal:2.6"  
 /inference="similar to AA sequence:RefSeq:ADN91829.1"  
 /codon\_start=1  
 /transl\_table=11  
 /product="50S ribosomal protein L29"  
 /protein\_id="Prokka:DMACINML\_00588"  
 /translation="MKYTEIKDKTAAELATMLKEKKVLLFTLKQKLKTMQLTNPKEIS  
 EVRKDIARINTAINALK"  
 gene 69421..69672  
 /gene="rpsQ"  
 /locus\_tag="DMACINML\_00589"  
 CDS 69421..69672  
 /gene="rpsQ"  
 /locus\_tag="DMACINML\_00589"  
 /inference="ab initio prediction:Prodigal:2.6"  
 /inference="similar to AA sequence:RefSeq:CAL35792.1"  
 /codon\_start=1  
 /transl\_table=11  
 /product="30S ribosomal protein S17"  
 /protein\_id="Prokka:DMACINML\_00589"  
 /translation="MAFKREIQGVVVKIAGEKTASILVERKVVHPRYRKIVKRFKKYL  
 IHDERNEVKVGDVVAVECRPLSKRKSFRLLKSVLATGVE"  
 gene 69672..70040  
 /gene="rplN"  
 /locus\_tag="DMACINML\_00590"  
 CDS 69672..70040  
 /gene="rplN"  
 /locus\_tag="DMACINML\_00590"  
 /inference="ab initio prediction:Prodigal:2.6"  
 /inference="similar to AA sequence:RefSeq:CAL35791.1"  
 /codon\_start=1  
 /transl\_table=11  
 /product="50S ribosomal protein L14"  
 /protein\_id="Prokka:DMACINML\_00590"  
 /translation="MIQSFTRLAVADNSGAKELMCIKVLGGSKRRYATVGDVIVASIK  
 KALPNGKVKKGQVVKAVIVRTKKEIHRDNGSLIRFDENAAILDNKREPIGTRIFGPV  
 GREVRYGGFMKIVSLAPEVL"  
 gene 70040..70273  
 /gene="rplX"  
 /locus\_tag="DMACINML\_00591"  
 CDS 70040..70273  
 /gene="rplX"  
 /locus\_tag="DMACINML\_00591"  
 /inference="ab initio prediction:Prodigal:2.6"  
 /inference="similar to AA sequence:RefSeq:CAL35790.1"  
 /codon\_start=1  
 /transl\_table=11  
 /product="50S ribosomal protein L24"  
 /protein\_id="Prokka:DMACINML\_00591"

```

/translation="MAVKLKIKKGDsvkvITGDDKGTGKVLAVYPKTLKVVVEGCKI
AKKAIKPSEKNPNNGGFINKEMPMDISNVAKVQE"
gene 70280..70822
      /gene="rplE"
      /locus_tag="DMACINML_00592"
CDS 70280..70822
      /gene="rplE"
      /locus_tag="DMACINML_00592"
      /inference="ab initio prediction:Prodigal:2.6"
      /inference="similar to AA sequence:RefSeq:CAL35789.1"
      /codon_start=1
      /transl_table=11
      /product="50S ribosomal protein L5"
      /protein_id="Prokka:DMACINML_00592"
      /translation="MRLKEKYDQSIKPALVKEFDIKNPMLIPAIEKIVISVGAGELAK
DQKVLQNVADTISLIAGQKAVITKAKKSVAGFKVREGFPVGMVTLRKENMFAFLDKL
ISIALPRVKDFRGLSRDGFDRGNYNFGLDEQLMFPEVEYDKILRTHGMNISIVTTAQ
NDKEAQKLELIGVPFTKKGK"
gene 70824..71009
      /gene="rpsZ"
      /locus_tag="DMACINML_00593"
CDS 70824..71009
      /gene="rpsZ"
      /locus_tag="DMACINML_00593"
      /inference="ab initio prediction:Prodigal:2.6"
      /inference="similar to AA sequence:RefSeq:ADN91824.1"
      /codon_start=1
      /transl_table=11
      /product="30S ribosomal protein S14 type Z"
      /protein_id="Prokka:DMACINML_00593"
      /translation="MAKKSMIAKAARKPKFKVGRGYTRCQICGRPHSVYRDFGICRVCL
RKMGNELIPGLKKASW"
gene 71019..71414
      /gene="rpsH"
      /locus_tag="DMACINML_00594"
CDS 71019..71414
      /gene="rpsH"
      /locus_tag="DMACINML_00594"
      /inference="ab initio prediction:Prodigal:2.6"
      /inference="similar to AA sequence:RefSeq:CAL35787.1"
      /codon_start=1
      /transl_table=11
      /product="30S ribosomal protein S8"
      /protein_id="Prokka:DMACINML_00594"
      /translation="MINDIISDSLTRIRNAGMRKLETTKLLHSKVVEALVGIFQAKGY
IESFNVIEEDKKKFINVVLKYDEKGSVINELKRVSKPGRRVYKKGKEIKRFKNGYGT
IVVSTSRGVLANDEAYKAGVGGEILCTIW"
gene 71492..72028
      /gene="rplF"
      /locus_tag="DMACINML_00595"
CDS 71492..72028
      /gene="rplF"
      /locus_tag="DMACINML_00595"
      /inference="ab initio prediction:Prodigal:2.6"

```



```

/inference="similar to AA sequence:RefSeq:CAL35786.1"
/codon_start=1
/transl_table=11
/product="50S ribosomal protein L6"
/protein_id="Prokka:DMACINML_00595"
/translation="MSRIGKQPIAIPSGVEVKLEGNLLKFKKGNLAKELDTKANVNVE
IKDNNILFSPKGEDRQSRAYWGTYRALAYNIVVGLTQGFSKTLEINGVGYKAALKGKV
LELSLGFSPINIDIPEGIEITVDKNNVIIKGSQVVGQVAAQIREFRPPEPYKGGK
VKYSDERIIRKAGKTSKK"
gene 72038..72394
      /gene="rplR"
      /locus_tag="DMACINML_00596"
CDS 72038..72394
     /gene="rplR"
     /locus_tag="DMACINML_00596"
     /inference="ab initio prediction:Prodigal:2.6"
     /inference="similar to AA sequence:RefSeq:CAL35785.1"
     /codon_start=1
     /transl_table=11
     /product="50S ribosomal protein L18"
     /protein_id="Prokka:DMACINML_00596"
     /translation="MRANVLKRKLILRIKRRIRAKISGCESFPRISVFKSNRTLYI
QAIDDKAVTLAAVDGRKLGVKANKEGAKKIAAEFAKVLKAKQIEQAVFDRNGVYVYH
VIAALAESLRENGIRL"
gene 72406..72849
      /gene="rpsE"
      /locus_tag="DMACINML_00597"
CDS 72406..72849
     /gene="rpsE"
     /locus_tag="DMACINML_00597"
     /inference="ab initio prediction:Prodigal:2.6"
     /inference="similar to AA sequence:RefSeq:CAL35784.1"
     /codon_start=1
     /transl_table=11
     /product="30S ribosomal protein S5"
     /protein_id="Prokka:DMACINML_00597"
     /translation="MEKYNREEFEEVIVDIGRVTKVVKGRRFRFTALVIVGNRKGVL
GVGYGKAKEVPDAIRKAVDDAFKNIVEVKTKGSTIAHDVEVKYNASRILLKPASEGTG
VIAGGSTRPIVELAGIKDILTKSLGNSNANVVRATIKALTMLKG"
gene 72854..73246
      /gene="rp10"
      /locus_tag="DMACINML_00598"
CDS 72854..73246
     /gene="rp10"
     /locus_tag="DMACINML_00598"
     /inference="ab initio prediction:Prodigal:2.6"
     /inference="similar to AA sequence:RefSeq:CAL35783.1"
     /codon_start=1
     /transl_table=11
     /product="50S ribosomal protein L15"
     /protein_id="Prokka:DMACINML_00598"
     /translation="MNLTKAAGSTHKTKRIGRGQSGMGKTATKGGKQTARKGYNEK
RGFEGGQQPLQRRLLPKVGFTSKIAPYVINVEKITAVKELNEITIESIKSVHKISKSV
TKIKLIGASAKDLASKIKDENISVTGSK"

```

gene 73246..74511  
/gene="secY"

CDS 73246..74511  
/gene="secY"  
/locus\_tag="DMACINML\_00599"  
/inference="ab initio prediction:Prodigal:2.6"  
/inference="similar to AA sequence:RefSeq:CAL35782.1"  
/codon\_start=1  
/transl\_table=11  
/product="preprotein translocase subunit"  
/protein\_id="Prokka:DMACINML\_00599"  
/translation="MNRALTNKILITLAFLFAYRVLAYVVPVPGVNADVIAEFFNDNQN  
NALGLFNVFSGGAAERFSIISLGIMPYITASIIMELLAATFPNIGKMKKERDGMQKYM  
QIIRYATIVITLVQSIGVAIGLQSLHGRGGAGAIMIENLNMFIALCAISMLAGTMLLM  
WIGEQTQRGIGNGISLIIFAGIVSGIPRAISGTVGQINSGEMNFLTAFVILVLILIT  
IGVIIYVELGERRIPISYSRKVVMQNQNKRIMNYIPIKINLSGVIPPIFASAILMFPT  
TILQTSTNPYLQAINDFLNPNGYLFHVLTFLFVIFFAFYFASIVFNAKDIAENLKKQG  
GFIPGIRPGEGTANYLNEVASRLTSGSIYLGVLVATLPWVLVKFMGVPFNFGGTSVLI  
VVQVALDTRKIEAQIYMNKYQTLNAIGL"

gene complement(74568..75827)  
/locus\_tag="DMACINML\_00600"

CDS complement(74568..75827)  
/locus\_tag="DMACINML\_00600"  
/inference="ab initio prediction:Prodigal:2.6"  
/inference="similar to AA sequence:RefSeq:CAL35781.1"  
/codon\_start=1  
/transl\_table=11  
/product="putative efflux protein"  
/protein\_id="Prokka:DMACINML\_00600"  
/translation="MKKKSYPKHPNDTKLDDKMEITEKSGFKIAVFSMAAMTMLGSV  
LISSALPAINRH FEDILIQSGASVETNFTLAHLDILVRLVLTLP AIFVWILSPFAGIL  
MDKLGKLFVFPAMVWVTLAGVSGFFLNNIYAILTSRAIFGMATAFIMTGASALLGDY  
YSRGGFNRRENALS LQGFFCAVGG AIFIS IAGFVSSYSWRYPFLVYGLGILITLVAMI  
YLFEPKFKFYNHTKIEEKTYWKFPIYFIGFFIMVVYISPTQLPYYIEEHLGLDP  
KFIGISMSISALCYGIFLSYKYIMRFLSIKTIYVATLFIVGCSFLILFLIDDFIAVL  
FALALLMGGGIMLVNNTAYLFSICPENARARAYGILASCIFLGQFLSPIISQPIVRQ  
LGLVDAFLIWA I LNFVVCIVFLFLKQR"

gene 76070..78172  
/gene="topA"

CDS 76070..78172  
/gene="topA"  
/locus\_tag="DMACINML\_00601"  
/EC\_number="5.99.1.2"  
/inference="ab initio prediction:Prodigal:2.6"  
/inference="similar to AA sequence:RefSeq:CAL35780.1"  
/codon\_start=1  
/transl\_table=11  
/product="DNA topoisomerase I"  
/protein\_id="Prokka:DMACINML\_00601"  
/translation="MKKNLIIVESPAKAKTIGNFLGKEYEVIASKGHIRDLPKSSFGI  
KIENDEFIPEYRITSDHSALVKELKEKAKGAKEIYLATDEDREGEAIAYHIAKAIGKD  
ENVLPRIVFHEITKNAIENALKNPRKLDMNSVNAQQTRRLLDRIVGYKLSPLLQKIQ

```

RGLSAGRVQSAALKIIVDREKEIRAFVPLEYFSIDMTFQKDLDAELVEFDKAKIEKLT
LTNKDRAKLVFEACKNENYAINDIESKERKIAPPPFMTSTLQQSASNRLGFNPCKTM
MIAQKLYEGVNTHEGVMGVITYMRTDSLNLAKEAVENARKFIQTNFGKDYLPSCANAY
TTKAKGAQEAHEAIRPTNLNFTPEIAAKFLDKDELKLYTLIYNRFLACQMNPAISQSQ
NVFVKNDRAVFKISGRKILFDGYKVKYGDMDKDKILPNLKIGENLKVQNLNEMNSHFE
PPSRYSEAGLVKKLESLGIGRPSTYAPTISILTSRDYVKIDKKQLIPSEVAFSVTEVL
EKNFSDIVDSKFTSNLENTLDEIAEDKANWQETLKEFYYPFMRKVEEGTKIASQKTV
TKLGENCPDCGGELAIRKGRGFGEFVACLNFPKCKYSRNLKNESKNEAEVSASKAKAG
IGITCPSCKEGERLSKRGKFGCSAYPKCNFISKYKPSDEKCEECGENLVIKELK
KGFLECLKCKIKKEIKD"
gene      78175..79011
          /gene="bioB"
          /locus_tag="DMACINML_00602"
CDS       78175..79011
          /gene="bioB"
          /locus_tag="DMACINML_00602"
          /EC_number="2.8.1.6"
          /inference="ab initio prediction:Prodigal:2.6"
          /inference="similar to AA sequence:RefSeq:CAL35779.1"
          /codon_start=1
          /transl_table=11
          /product="putative biotin synthase"
          /protein_id="Prokka:DMACINML_00602"
          /translation="MKVMLCAISNIASGNCSSECKYCTQSAYVKTNIQKYRQKEISQI
VLEAKIAKKNEALGFCLVTAGLGLDDEKLEYVCKAAHAVQKEVPNLLLIACNGMASVE
QLKELKKAGIFSYNHNLEASKEFFPQICTTHTWESRFQTNLNAKEAGLMLCCGGIYGM
GESEEDRISLRKSLQELQPFSTPINFFIANENLKLQVPKLSADEALKIISDTKEALPD
TVVMVAGGREVVLQERQYEIFKAGAGAIIVIGDYLTTKGEEPSRDIVKLKEMGFTFASE
CH"
gene      78992..80167
          /locus_tag="DMACINML_00603"
CDS       78992..80167
          /locus_tag="DMACINML_00603"
          /inference="ab initio prediction:Prodigal:2.6"
          /inference="similar to AA sequence:RefSeq:CAL35778.1"
          /codon_start=1
          /transl_table=11
          /product="putative transmembrane transport protein"
          /protein_id="Prokka:DMACINML_00603"
          /translation="MHPSVIDSQGLIDLQILIVIALCLLFSPHIAKILRLPISATEII
LGALIAYFGFIGKSENFTILANVGFYLMFIAGMEVNLRAFFNMDKEVAKKSFFYIIL
LYSFSSAIVWIFELSFVFLIIPVMSVGLLSLLYKDFGKECYWLNTAMIVATLAEVVS
IVLLTIAGAFLLREGTNIIDVVQSILYLNIFLGLCLLSFKILGVLFWWYPQLKVVLMPW
EDKNEKDIRFCMAIFILIIIVAMIITKLEIVLGSFIAGSFIATFFDHKKDLEHKLSSF
HGFLIPIFFIHIGTTFDLKMILEYEVLDAILLMFVMVGLRILCASVFWKKIGFQNM
IFGLSHSMPLTLIATATLGYSGKVISEELYALILTALFEAIVMSAIKFISNIKK"
gene      80297..81565
          /locus_tag="DMACINML_00604"
CDS       80297..81565
          /locus_tag="DMACINML_00604"
          /inference="ab initio prediction:Prodigal:2.6"
          /inference="similar to AA sequence:RefSeq:ADN91805.1"
          /codon_start=1
          /transl_table=11

```

```

/product="Citrate synthase"
/protein_id="Prokka:DMACINML_00604"
/translation="MSNSVTVTDNRNGKSYEFPIYDGTTPGSVVDMGSFYKQTGMFSY
DEGLTSTATCKSKITYIDGEEGVLHMRGYPIEWLAENKFLDQVHLLLYKELPSSERL
EAFRYELKKRSYIHEGMHRLFDSFPDHAHPMAVLQGAUSSLSAFYDPHLNMMNVREEYM
EMAARVVAKIPTIVAAARYKNGFPMAYPNLDRGFTENFLYMLRTPYDQVHVELKPIEV
KALDQVFMHLDHEQNASTSTVRAVGSTHAHPYACISAGIGALWGHAGGANEGVIRM
LEEIATVDRVDEFIKRAKDKNDPFRLMGFGHRVYKNFDPRAKVLKCLRDLIDELGID
TNLIKVATRIEEIALQDDYFVQRNLYPNVDFHSLILKALGIPNEMFATLQVIGRTPG
WIAQWIEQKEQETLKIVRPRQLYLGETSKI"
gene      81639..82418
          /gene="cysQ"
          /locus_tag="DMACINML_00605"
CDS       81639..82418
          /gene="cysQ"
          /locus_tag="DMACINML_00605"
          /inference="ab initio prediction:Prodigal:2.6"
          /inference="similar to AA sequence:RefSeq:ADN91804.1"
          /codon_start=1
          /transl_table=11
          /product="CysQ protein"
          /protein_id="Prokka:DMACINML_00605"
          /translation="MFKLDNLLKTAIDASNEASKAILKERKNLQIWKQDKTPLTSAD
LASNEILNDILGKTDIKILSEGLLNQEESKNLQSYWLIDPLDGTSGFLKGSDEFCEIM
ISLIYEARPVLALIKNPSKGDIFYAHQNTRVYKNDKILDTNEQDFINNQSKALLSVNH
LSKEDENFAKKYHLEPINIGSGLKFCAILGKAGIYKRFEKLNQSWDISAGDFLVNQNG
GFMGTFSKEMILYSPLNYKCEPFICVSQKSFLLNIYIHKNSI"
gene      82443..83204
          /locus_tag="DMACINML_00606"
CDS       82443..83204
          /locus_tag="DMACINML_00606"
          /inference="ab initio prediction:Prodigal:2.6"
          /inference="similar to AA sequence:RefSeq:CAL35775.1"
          /codon_start=1
          /transl_table=11
          /product="putative periplasmic protein"
          /protein_id="Prokka:DMACINML_00606"
          /translation="MKIFCILLIGILLNSSLFANNFSQKKIILEQVESFEIIDLQQN
VAKQNLQKQKGFIDSSSLVGKESIRKDNQVDFAIQVMSFRQNFQYTLQDGFQINAKQFS
TLFSKNLVDNLKLNFNVAANGVYQDSRTLARFSPKSKLLNVSPFLKKEKDKSQIYA
KFTDYLVINLDDFYVNITNYFVAITKNAVANINFQVSTSNQKILTSKNVRLNLFALH
AQDPRINYQELVNQMPNMLAEVINKELGKLNLIQV"
sig_peptide 82443..82502
          /locus_tag="DMACINML_00606"
          /inference="ab initio prediction:SignalP:4.1"
          /note="predicted cleavage at residue 20"
gene      complement(83211..83384)
          /locus_tag="DMACINML_00607"
CDS       complement(83211..83384)
          /locus_tag="DMACINML_00607"
          /inference="ab initio prediction:Prodigal:2.6"
          /codon_start=1
          /transl_table=11
          /product="hypothetical protein"

```

```

/protein_id="Prokka:DMACINML_00607"
/translation="MQININLEEMTKWQITYELKRILSSLDPITAHEIAKELRQEFLS
IEELQDRIRQIND"
gene      complement(83498..84274)
          /gene="murB"
          /locus_tag="DMACINML_00608"
CDS       complement(83498..84274)
          /gene="murB"
          /locus_tag="DMACINML_00608"
          /EC_number="1.3.1.98"
          /inference="ab initio prediction:Prodigal:2.6"
          /inference="similar to AA sequence:RefSeq:CAL35772.1"
          /codon_start=1
          /transl_table=11
          /product="UDP-N-acetylenolpyruvoylglucosamine reductase"
          /protein_id="Prokka:DMACINML_00608"
          /translation="MIIDFKKYSSVKIGGEFEVEVLDQIREFDGFLIGGANLLVSPK
PKNIGILSDNFNFIIEIQNKDFLHLRIGCKTKASQMYRFSKENNLYGFEYLSKIPGT
LGGLLKMNAGLKDECISQNLVKIATSKGEILRENIDFSYRFCPLNMPFFWAEFKLGFG
FDKIKDENLKNARNNQPASGASFGSIFKNPKGDFAGRLIEAVGLKGFSGKGMALSDKHA
NFLINKKNASFEDAIFLIELAKKKVFEFNGINLEEEVIV"
gene      complement(84271..84540)
          /gene="fliQ"
          /locus_tag="DMACINML_00609"
CDS       complement(84271..84540)
          /gene="fliQ"
          /locus_tag="DMACINML_00609"
          /inference="ab initio prediction:Prodigal:2.6"
          /inference="similar to AA sequence:RefSeq:CAL35771.1"
          /codon_start=1
          /transl_table=11
          /product="flagellar biosynthetic protein"
          /protein_id="Prokka:DMACINML_00609"
          /translation="MDESTLVALGVQTFKITLLSLPMLLAGLIAGLIISIFQATTQI
NEMTSLFVPKIILVVIVIIIFLMPWMTTMMIDFTENILNQIPTFIK"
gene      complement(84552..85415)
          /locus_tag="DMACINML_00610"
CDS       complement(84552..85415)
          /locus_tag="DMACINML_00610"
          /inference="ab initio prediction:Prodigal:2.6"
          /inference="similar to AA sequence:RefSeq:CAL35770.1"
          /note="conserved hypothetical protein Cj1674"
          /codon_start=1
          /transl_table=11
          /product="hypothetical protein"
          /protein_id="Prokka:DMACINML_00610"
          /translation="MKKTITIAHSPDADDIFMYMAIKLGWIGNDFDYKNTALDIQTLN
DLALRNEFDATAISFGLYPLIAQEYALLRTAVSFGEGYGPKLIKKQNTHLKRNFKIAL
SGANTTNALIFRMKYPEARIIYKNFLEIENAVLSGEVDAGVLIHESILEFDSSLCVEA
EIWDIWLELAQENLPLPLGGMALRRSLPLSDAIKIERDLTNAVKIADSNRRILAPMLM
ERNLIRVDEKKLDTYLNLYANKNSICMNEMQFKAVDVLFKLGVDYKFDYKIIHAKDYL
IPSEYEEFRNS"
gene      85525..86556
          /gene="recA"

```

CDS /locus\_tag="DMACINML\_00611"  
 85525..86556  
 /gene="recA"  
 /locus\_tag="DMACINML\_00611"  
 /inference="ab initio prediction:Prodigal:2.6"  
 /inference="similar to AA sequence:RefSeq:CAL35769.1"  
 /codon\_start=1  
 /transl\_table=11  
 /product="recA protein"  
 /protein\_id="Prokka:DMACINML\_00611"  
 /translation="MDDNKKKSLDAALKSLDKAFGKGTILRLGDKEVEQIDSIGTGSV  
 GLDLALGIGGIPKGRIIEIYGPESGKTTLLHIIAECQKAGGVCAFIDAHALDVKY  
 AKNLGVDTDNLYISQPDFGEQALEIVETIARSGAIDLIVVDSVAALTPKAEIEGDMGD  
 QHVGLQARLMSQALRKL TGIVHKMNTTVIFINQIRMKIGAMGYGTPETTTGGNALKFY  
 ASVRLDVRKVATLKQNEEPIGNRVKVKVKNVAPPFRQAEFDVMFGEGLSREGELID  
 YGVKLDIVDKSGAWFSYKDKKLGQGRENSKAFLENPEIADEITKEIQNSMGIEGMIS  
 GSEDEEGEE"

gene 86556..87800  
 /gene="eno"

CDS 86556..87800  
 /gene="eno"  
 /locus\_tag="DMACINML\_00612"  
 /EC\_number="4.2.1.11"  
 /inference="ab initio prediction:Prodigal:2.6"  
 /inference="similar to AA sequence:RefSeq:CAL35768.1"  
 /codon\_start=1  
 /transl\_table=11  
 /product="enolase"  
 /protein\_id="Prokka:DMACINML\_00612"  
 /translation="MLVIEDVRAYEVLDSRGNPTVKAEVVLSDGSMGAAIVPSGASTG  
 SKEALELRDNDERFGGKGVLKAVSNVNETIADEILGLDALNQAQLDDTLRELDGTNNY  
 SKLGANATLGVSMATARAANALGVPLYRYLGGANASILPVPMCNIINGGAHASNNID  
 FQEFMIMPFGFTSFKEALRSVCEIYAILKKELVNLGHSAAALGDEGGFAPNLANNTPEI  
 DLLMTCIKKAGYENRVKIALDVASTEFFKEGKYHMEGKAFSSEDIERYVELCAKYPI  
 CSIEDGLAENDFEGWIKLTEKLGNKIQLVGDDL FVTNEDILREGI IKKMANAVLIKPN  
 QIGTITQTMRTVRLAQRNNYKCVMSHRSGESED AFIA DFAVALNTGQIKTGALARGER  
 TAKYNRLLEIELESDEFLGEKL"

gene 87866..88069  
 /locus\_tag="DMACINML\_00613"

CDS 87866..88069  
 /locus\_tag="DMACINML\_00613"  
 /inference="ab initio prediction:Prodigal:2.6"  
 /inference="similar to AA sequence:RefSeq:ADN91797.1"  
 /codon\_start=1  
 /transl\_table=11  
 /product="hypothetical protein"  
 /protein\_id="Prokka:DMACINML\_00613"  
 /translation="MVFWAFLVIVGAIYFGNMLFGQYSLDTLLSLEATKEELNKKISF  
 LKEQNAKAQKDYFELQGLYPNEN"

gene 88059..88721  
 /gene="cgpA"

CDS 88059..88721  
 /locus\_tag="DMACINML\_00614"

```

/gene="cgpA"
/locus_tag="DMACINML_00614"
/inference="ab initio prediction:Prodigal:2.6"
/inference="similar to AA sequence:RefSeq:CAL35766.1"
/codon_start=1
/transl_table=11
/product="putative periplasmic protein"
/protein_id="Prokka:DMACINML_00614"
/translation="MGTKILGIFLIFISLLNAEENPFKSEQNMSMIVPPDFQKEDIKF
NSNARVLKSVSFNYINLDGSEEVLNIDINKSIDWHDTYTLVRSKSPDPKVFVDSVTI
PERNDSKKESNNTASIEIPLQVDKIYDFISYAVYKNKIKLNTNDELISDFSIGNPSKI
VDFKSDLVNPTKNIRISNSLFKRIDFGSHKGYRRLVIYLDGNYNYNIQKDATGYMIN
LL"
gene      88721..89560
/locus_tag="DMACINML_00615"
CDS      88721..89560
/locus_tag="DMACINML_00615"
/EC_number="6.5.1.1"
/inference="ab initio prediction:Prodigal:2.6"
/inference="similar to AA sequence:RefSeq:CAL35765.1"
/codon_start=1
/transl_table=11
/product="putative ATP-dependent DNA ligase"
/protein_id="Prokka:DMACINML_00615"
/translation="MRIFIFLWCACFAFASDILLLSKISEQEIQNKNFNGYLMSEKLD
GIRGIWEAGKFKTRQDNPIHTPSYFTYNFPSFKLDGELWIARDKFDEVSALIRSDNLD
SSLWRSVTYNVFDVPNACEEFKLTSC TLSNR LKVLEQYLQQNPNPYIKI IKQIPIK DQ
EHLKEFYKD IILNKGEGVIRKDLAPYEKGRSKNAFKLPYEDA ECKVIGYTEGKGKF
QGKIGALLCQMPNDRVIRIGSGLKDKDRENPPKIGSIVTYKFNGLTKNSLPRFPVFLH
IRD"
gene      89607..89684
/locus_tag="DMACINML_00616"
tRNA     89607..89684
/locus_tag="DMACINML_00616"
/product="tRNA-Pro"
/inference="COORDINATES: profile:Aragorn:1.2"
/note="tRNA-Pro(tgg)"
gene      89709..89785
/locus_tag="DMACINML_00617"
tRNA     89709..89785
/locus_tag="DMACINML_00617"
/product="tRNA-His"
/inference="COORDINATES: profile:Aragorn:1.2"
/note="tRNA-His(gtg)"
gene      89790..89866
/locus_tag="DMACINML_00618"
tRNA     89790..89866
/locus_tag="DMACINML_00618"
/product="tRNA-Arg"
/inference="COORDINATES: profile:Aragorn:1.2"
/note="tRNA-Arg(tcg)"
gene      89881..89957
/locus_tag="DMACINML_00619"
tRNA     89881..89957

```

/locus\_tag="DMACINML\_00619"  
 /product="tRNA-Arg"  
 /inference="COORDINATES: profile:Aragorn:1.2"  
 /note="tRNA-Arg(tct)"  
 gene 89963..90047  
 /locus\_tag="DMACINML\_00620"  
 tRNA 89963..90047  
 /locus\_tag="DMACINML\_00620"  
 /product="tRNA-Leu"  
 /inference="COORDINATES: profile:Aragorn:1.2"  
 /note="tRNA-Leu(tag)"  
 gene 90248..91003  
 /gene="proB"  
 /locus\_tag="DMACINML\_00621"  
 CDS 90248..91003  
 /gene="proB"  
 /locus\_tag="DMACINML\_00621"  
 /EC\_number="2.7.2.11"  
 /inference="ab initio prediction:Prodigal:2.6"  
 /inference="similar to AA sequence:RefSeq:EAQ71967.2"  
 /codon\_start=1  
 /transl\_table=11  
 /product="glutamate 5-kinase"  
 /protein\_id="Prokka:DMACINML\_00621"  
 /translation="MQRIVKVGSHVISDENLLNLKRFENLVAFLAKLMQKYEVILVT  
 SAAISAGCTKLHIDRKNLINKQVLAIGQPFLISVYNEFLAKFGKMGQILLTGKDFD  
 SRKATKHAKNAIDAMIDLGILPIINENDATAIEEIVFGDNDSLAYSATHFFEADLLVI  
 LSDIDGFYDKNPSEFSDAKRLEKVEFIKEEWLNVSVKTGSEHGTGGIVTKLKAACKFL  
 ENDKKMFLASGFDLSVAKAFLLNKQIGGTLFE"  
 gene 91083..91286  
 /locus\_tag="DMACINML\_00622"  
 CDS 91083..91286  
 /locus\_tag="DMACINML\_00622"  
 /inference="ab initio prediction:Prodigal:2.6"  
 /codon\_start=1  
 /transl\_table=11  
 /product="hypothetical protein"  
 /protein\_id="Prokka:DMACINML\_00622"  
 /translation="MKKLARIFLLVAFALSAFAYDPYACSLQNLINLGSCNPNLVPN  
 DEYACWALPNVRVNGELVCAEYY"  
 sig\_peptide 91083..91145  
 /locus\_tag="DMACINML\_00622"  
 /inference="ab initio prediction:SignalP:4.1"  
 /note="predicted cleavage at residue 21"  
 gene 91286..92323  
 /locus\_tag="DMACINML\_00623"  
 CDS 91286..92323  
 /locus\_tag="DMACINML\_00623"  
 /inference="ab initio prediction:Prodigal:2.6"  
 /inference="similar to AA sequence:RefSeq:EAQ72322.1"  
 /note="conserved hypothetical protein"  
 /codon\_start=1  
 /transl\_table=11  
 /product="hypothetical protein"



```

/protein_id="Prokka:DMACINML_00623"
/translation="MSILVNAVDTFYSTKNEAVFSASKSENIKRNVAADFNTDNNTKNS
VYFFSDDKEISLNSNESMELLTNHFSANDFLKLSNGNIGLSGKAAAFVEGWYKDIMI
NRNFLNADRDKNGRIENNEYLSLKNSVEDVAKNQDLSKNFGAVVLRMAQSTTGVENT
ISDKSLSIEALMDESISDRNFDGIITRLEYSKGGTDMQGYTNWAIDALNDILDDSD
KAKKIHLVVDPTSEIWHSYAGKTLNEVKAYYDNPFRATSGTSASGFLNIVIEEPRILP
GNDLENEKEQLLEFPFRALIQNPNITKEKLLKLNQQRITHNYQDHQKQDLQKEF
TQNFFKTDLKA"
gene 92455..93375
      /gene="fmt"
CDS  /locus_tag="DMACINML_00624"
     92455..93375
      /gene="fmt"
      /locus_tag="DMACINML_00624"
      /EC_number="2.1.2.9"
      /inference="ab initio prediction:Prodigal:2.6"
      /inference="similar to AA sequence:RefSeq:CAL34269.1"
      /codon_start=1
      /transl_table=11
      /product="methionyl-tRNA formyltransferase"
      /protein_id="Prokka:DMACINML_00624"
      /translation="MMKKIIFMGTPSYATCILKALLEDENFELLALFTQPKAVGRKQ
ILTPSDTKAFLLQKAPQVPIFTPNSLKDESVEIEQIRALKPDFIVVAAYGKILPKAILD
IAPCINLHASLLPKYRGASPIQSAILNADEKSGVCTMLMEEGLDTGAVLESVECDIRD
KNVNEVFEILASLAAKLILSTLLNYEKLLPKKQDESLATHCKKIKKEDGLVSLDNARE
IYQKYLAFTPWPGIFLENGLKFIELELVDELKQNAKMGEILELEKESFLLACKQGILR
IKKLQESGKKALDGRTYLNGKRLKSADSLC"
gene 93338..93991
      /gene="birA"
CDS  /locus_tag="DMACINML_00625"
     93338..93991
      /gene="birA"
      /locus_tag="DMACINML_00625"
      /EC_number="6.3.4.15"
      /inference="ab initio prediction:Prodigal:2.6"
      /inference="similar to AA sequence:RefSeq:CAL34270.1"
      /codon_start=1
      /transl_table=11
      /product="putative biotin--[acetyl-CoA-carboxylase]
synthetase"
      /protein_id="Prokka:DMACINML_00625"
      /translation="MEKGLKVQIACVESIDSTHLFLCEQIRSGKINENFALYALNQT
GVGSRENWQSSGNLHLSFCIKESDLPSDLPLASVSIYFAYLLKEILQEKGSRWLK
WPNDLYLDDKKGVIISTKISDFIVGGMGLNLKFAPHDAALCDVEISLEDLIEKFLQR
LEKKFLWKHIFSKYMLEFEKSRQFSVHYEGKVFSLNAFLYEDGSILLGDKRVYSLR"
gene 93988..94773
      /locus_tag="DMACINML_00626"
CDS  /locus_tag="DMACINML_00626"
     93988..94773
      /locus_tag="DMACINML_00626"
      /inference="ab initio prediction:Prodigal:2.6"
      /inference="similar to AA sequence:RefSeq:CAL34271.1"
      /codon_start=1
      /transl_table=11
      /product="parA family protein"

```

```

/protein_id="Prokka:DMACINML_00626"
/translation="MSEIITIANQKGGVGGKTTTAVNLAASLAVAEEKVLLIDVDPQAN
ATTGLGFNRNNYEYNIYHVFIGRKKLSDIILKTELPQLHLAPSNIGLVIEQELAKGE
NNEKKMILKNQIQEVLDEYDFIIDSPPALGSITINAFVASDSVIIPIQCEFYALEGV
AMVLNTIKIIKKTINPKLKVRGFLPTMYSSQNNLSKDVEDLKQNFKKQLFTINGNED
DFIVIPRNVKLAESPSFGKPIILYDIKSPGSLAYQNLAYSILG"
gene 94778..95614
/locus_tag="DMACINML_00627"
CDS 94778..95614
/locus_tag="DMACINML_00627"
/inference="ab initio prediction:Prodigal:2.6"
/inference="similar to AA sequence:RefSeq:CAL34272.1"
/codon_start=1
/transl_table=11
/product="parB family protein"
/protein_id="Prokka:DMACINML_00627"
/translation="MGLNKNRGLSTLMGDVGEVYSRELGLDKNQVSLIEISKITPNPF
QPRKTFDEVALNELANSIKEHGLIQPIIVLKKNDSFILVAGERRLRATQILGEENILA
FVSDSDESKLRELALIENIQRENLPNIELANSYKDLIEVYNITQENLAELIHKSRQI
TNTLRLNLDSTQELIASGKISQGHAKVLVGLDKEDKVLVDSILGQKLSVRDTERL
VQVKVKNKIEDEEFENSMQNLKQILNKIGFMCKNNKELIIRLDNIDKIKKLTEILN
KI"
gene 95673..96098
/locus_tag="DMACINML_00628"
CDS 95673..96098
/locus_tag="DMACINML_00628"
/EC_number="3.6.3.14"
/inference="ab initio prediction:Prodigal:2.6"
/inference="similar to AA sequence:RefSeq:CAL34273.1"
/codon_start=1
/transl_table=11
/product="ATP synthase F0 sector B' subunit"
/protein_id="Prokka:DMACINML_00628"
/translation="MFEDMHPSIMLATMAIFLAMIVILNTMLYKPLLKFMDERNDSIK
NDENKVKENSQEMLGANDEVEAIVSTREEIHKIKQNAINAAKEEAQQAIAKAKKEELE
RKMANFYTELISQKKELDHLSAHLPLDKALQNNIKQH"
gene 96110..96622
/locus_tag="DMACINML_00629"
CDS 96110..96622
/locus_tag="DMACINML_00629"
/EC_number="3.6.3.14"
/inference="ab initio prediction:Prodigal:2.6"
/inference="similar to AA sequence:RefSeq:CAL34274.1"
/codon_start=1
/transl_table=11
/product="ATP synthase F0 sector B subunit"
/protein_id="Prokka:DMACINML_00629"
/translation="MKKLFYFIFLLPLCAFGASNGSGEYDIVPRTINFLIFIAILYYF
VANPFKAFYKNRILRISLKLDEIQKLLLESKAKKLDTMKKLEEAKANAAAALVVAKKE
AEVLAQKIKEETQNELALLEKHFEQKSYEFRKMEKEVVSLLTKEIFEDSNIALKQNE

```

IIDIMMKVS"  
 gene 96622..97143  
       /gene="atpH"  
       /locus\_tag="DMACINML\_00630"  
 CDS 96622..97143  
       /gene="atpH"  
       /locus\_tag="DMACINML\_00630"  
       /EC\_number="3.6.3.14"  
       /inference="ab initio prediction:Prodigal:2.6"  
       /inference="similar to AA sequence:RefSeq:CAL34275.1"  
       /codon\_start=1  
       /transl\_table=11  
       /product="ATP synthase F1 sector delta subunit"  
       /protein\_id="Prokka:DMACINML\_00630"  
       /translation="MNDLIAKRYAKAITLRADISEFYDNLSSILSSAFALPKFKNIIES  
       NQIQKEKKLEFVISLIEKASPSFNNFLKLLAENSRLSCIPQIAKELERQKSFKENIFL  
       GTVYSKEVLSEDSIKELESRLGAKFGVKIKLQNKAGLNEGVKISLEELGYEISFSMKA  
       LQNMSEYILKII"  
 gene 97156..98661  
       /gene="atpA"  
       /locus\_tag="DMACINML\_00631"  
 CDS 97156..98661  
       /gene="atpA"  
       /locus\_tag="DMACINML\_00631"  
       /EC\_number="3.6.3.14"  
       /inference="ab initio prediction:Prodigal:2.6"  
       /inference="similar to AA sequence:RefSeq:CAL34276.1"  
       /codon\_start=1  
       /transl\_table=11  
       /product="ATP synthase F1 sector alpha subunit"  
       /protein\_id="Prokka:DMACINML\_00631"  
       /translation="MKFKADEISSIIKERIENFDLNLIEEETGKIISVADGVAKVYGL  
       KNIMAGEMVEFDNGDKGMALNLEESSVGIVILGKGEGLKEGTSVKRLKLLKVPVGEA  
       LIGRVNALGEPIDAKGVINSNEFRFVEEKAKGIMARKSVHEPLHTGIKAI DALVPIG  
       RGQRELIIGDRQTGKTTVAVDTIISQKQGVVCIYVAIGQKQSTVAQVVKRLEE HGM  
       DYTIVVNAGASDPAALQYLAPYTGVTMGEFFRDNAKHALIVYDDL SKHAVAYREMSLI  
       LRRPPGREAYPGDV FYLHSRLLERASKLNDELGAGSLTALPIIETQAGDVSAYIPTNV  
       ISITDGQIFLETDLFNSGIRPAINVGLSVSRVGGAAQIKATKQVSGTLRLDLAQYREL  
       QAF AQFASDLDEASRKQLERGERMV ELLKQPPYSPLSVEKQVVLIFAGTKGYLDDVAV  
       SKIREFEDGIYPFIEAKYPDLFEQIRSKKALDAELEEK LAKAINEFKANHL"  
 gene 98671..99555  
       /gene="atpG"  
       /locus\_tag="DMACINML\_00632"  
 CDS 98671..99555  
       /gene="atpG"  
       /locus\_tag="DMACINML\_00632"  
       /EC\_number="3.6.3.14"  
       /inference="ab initio prediction:Prodigal:2.6"  
       /inference="similar to AA sequence:RefSeq:CAL34277.1"  
       /codon\_start=1  
       /transl\_table=11  
       /product="ATP synthase F1 sector gamma subunit"  
       /protein\_id="Prokka:DMACINML\_00632"  
       /translation="MSNLKEIKRKIKSVHNTQKTTNAMKLVSTAKLKKAE EAAKRSRI

YAQKIDEILSEISFQVNVKIVHNEEDSRFVL FHKKNQIKNVDLIFITADKGLCGGFNIK  
 TLKAVSELLKEYEKNINVRLRAIGKTGIEYFNFQKIELLEKYLGSSSPDYDKACSV  
 IQAAVDDYLNIGITDEVVLVHNGYKNMITQELKISHLIPVEPKQIEGNSNSLLELEPED  
 TDLLGDLMKTYFEYNNMYALIDSLAAEHSARMQAMDNATNNAKARVKQLNLAYNKARQ  
 ESITTELIEIISGVESMK"

gene 99581..100978  
 /gene="atpD"  
 /locus\_tag="DMACINML\_00633"

CDS 99581..100978  
 /gene="atpD"  
 /locus\_tag="DMACINML\_00633"  
 /EC\_number="3.6.3.14"  
 /inference="ab initio prediction:Prodigal:2.6"  
 /inference="similar to AA sequence:RefSeq:ABS43225.1"  
 /codon\_start=1  
 /transl\_table=11  
 /product="ATP synthase F1, beta subunit"  
 /protein\_id="Prokka:DMACINML\_00633"  
 /translation="MQGFISQVLGPVVDVDFNDYLPQINEAIVVNFSEGGKQKLVLE  
 VAAHLGDNVRRTIAMDMTDGLVRGLKAEALGAPISVPVGEKVLGRIFNVTGDLIDEGE  
 EVAFDKKWAIHRDPPAFEDQSTKSEIFETGIKVVDLLAPYAKGGKVLFGGAGVGKTV  
 IIMELIHNVAFKHSGYSVFAGVGERTREGNDLYNEMKESNVLDKVALCYQMNEPPGA  
 RNRIALTGLTMAEYFRDEMGLDVLMFIDNIFRFSQSGSEMSALLGRIPSAVGYQPTLA  
 SEMGKFQERITSTKKSITSVQAVYVPADDLTDPPATVFAHLDTTLNRSIAEKGI  
 YPAVDPLDSTSRMLDPNIIIGEEHYKVARGVQSVLQKYKDLQDIIAILGMDELSEEDKL  
 IVERARKIEKFLSQPFVFAEVFTGSPGKYISLEETIAGFKGILEGKYDHLPENAFYMW  
 GNIDEAIAKADKLGK"

gene 100982..101371  
 /gene="atpC"  
 /locus\_tag="DMACINML\_00634"

CDS 100982..101371  
 /gene="atpC"  
 /locus\_tag="DMACINML\_00634"  
 /EC\_number="3.6.3.14"  
 /inference="ab initio prediction:Prodigal:2.6"  
 /inference="similar to AA sequence:RefSeq:CAL34279.1"  
 /codon\_start=1  
 /transl\_table=11  
 /product="ATP synthase F1 sector epsilon subunit"  
 /protein\_id="Prokka:DMACINML\_00634"  
 /translation="MDNLISFEIVTPMGVIYQGEVKSVTLPGSEGEFGVLKGHAALVS  
 SLKSGVIDIEKADLNHELIAIDAGHAKVDEDKISVLAKGAVWISGSSESEIEKNLESA  
 KELIKSMSSDNTALAATFSKLDNAKVR"

gene 101372..101926  
 /gene="exbB3"  
 /locus\_tag="DMACINML\_00635"

CDS 101372..101926  
 /gene="exbB3"  
 /locus\_tag="DMACINML\_00635"  
 /inference="ab initio prediction:Prodigal:2.6"  
 /inference="similar to AA sequence:RefSeq:CAL34280.1"  
 /codon\_start=1  
 /transl\_table=11  
 /product="putative MotA/TolQ/ExbB proton channel family

```

protein"
/protein_id="Prokka:DMACINML_00635"
/translation="MNFEAIFQFFGSSSIITYIVLAWLSLYFILSFFILFSRMTYLAA
WKNKEKESLESLLLGEKDLRTRSRILRKCTDTSLSHLEIYKNLASRRASNGLTWLSIV
ASTSPFIGLFGTVISILETFGGLGTQNSLSIIAPKISEALVATGCGILVAIPAYTFHL
IIKRKAFELLSIIDSEIKVISSNK"
gene
101937..102326
/gene="exbD3"
CDS
101937..102326
/gene="exbD3"
/locus_tag="DMACINML_00636"
/inference="ab initio prediction:Prodigal:2.6"
/inference="similar to AA sequence:RefSeq:CAL34281.1"
/codon_start=1
/transl_table=11
/product="putative exbD/tolR family transport protein"
/protein_id="Prokka:DMACINML_00636"
/translation="MPFDDEKPELNITPLVDIMLVLLAILMVTAPSITYEEKINLPQG
SQKSTSAPSVKSLIVSINAKKEIFLNQEKYSFVSFADNLAQKKAQFNTDEPVFIRADK
SLKYDDVIFVLRISIKNLGFSKVALQTE"
gene
102331..103107
/locus_tag="DMACINML_00637"
CDS
102331..103107
/locus_tag="DMACINML_00637"
/inference="ab initio prediction:Prodigal:2.6"
/inference="similar to AA sequence:RefSeq:CAL34282.1"
/codon_start=1
/transl_table=11
/product="putative periplasmic protein"
/protein_id="Prokka:DMACINML_00637"
/translation="MKEYGLGKINSFLLAVAVYIFIIILIFFRLVTHMEPAIQYTDIQ
DSFIDIELMEPSKKVVNEQSTPKDIQKPTQELDIEKLFAQTTNKAVKTEDVDQKASNF
NELFGSIKEIQEEKTTKIQSSAKSETRSSKTQASELVKQLNDSLLEESINQGESIK
NQKTGIYDEFLGKVRTITQRWRQYHPNSENISVKVKIFIDENGNFGYTSVEKSGNSL
YDAKVAEFLNQKGFIAYPQNKISISITMNLKDEAQIQK"
gene
103121..104332
/gene="tolB"
CDS
103121..104332
/gene="tolB"
/locus_tag="DMACINML_00638"
/inference="ab initio prediction:Prodigal:2.6"
/inference="similar to AA sequence:RefSeq:CAL34283.1"
/codon_start=1
/transl_table=11
/product="putative TolB precursor protein"
/protein_id="Prokka:DMACINML_00638"
/translation="MKKIVTVFLIFLIGILWAEDPVIDVVNSGVVLPKIIVKDNSLSD
INLKRSFYNIIVNDLVSSNFVSDASSEASNYTFEYDLSKNGNALNLHVKIKAGGL
EKSSQTYALNGVEQYPFLAHSVKASVNALGLAPVEWMDHKILIARNSSSKKSQIIMA
DYTLTYQKVIIDGGLNLPKWGNKEQSIFYTAYDHRPTLYRYDLRTNKASKILSSG
GMVVASDVS LDGSKLLVTMAPKDQPDIIYLDLKSNTQLTNYSGIDVNGNFIGVDDS
KFVFSVSDRLGYPNIFIQNVNNGSAEQAVFHGKNNSAVSTYKDFLVYSSREPQVGVFN

```

IYLMINSTGIRQFTANGKNLFPRFSSDGGSSIVFIKYLGAQSALGVIRVNANKTFYFP  
 LKVGKIQSIDW"  
 gene 104409..104906  
 /gene="pal"  
 /locus\_tag="DMACINML\_00639"  
 CDS 104409..104906  
 /gene="pal"  
 /locus\_tag="DMACINML\_00639"  
 /inference="ab initio prediction:Prodigal:2.6"  
 /inference="similar to AA sequence:RefSeq:CAL34284.1"  
 /codon\_start=1  
 /transl\_table=11  
 /product="peptidoglycan associated lipoprotein (omp18)"  
 /protein\_id="Prokka:DMACINML\_00639"  
 /translation="MKKILFSSIAAFALVISGCSTKSTSVSGDTSVDSNRGTGGSDGW  
 DIDSKISQLNDTLGKVYFDKFNIRPDMQNVVNTNANIFNNEVSGVSITVEGNCDEW  
 GTDEYNQALGLKRAKAVKEALIAQGVNSDRIAVKSYGETNPVCTEKTACDAQNRRAE  
 FKLSR"  
 sig\_peptide 104409..104477  
 /gene="pal"  
 /locus\_tag="DMACINML\_00639"  
 /inference="ab initio prediction:SignalP:4.1"  
 /note="predicted cleavage at residue 23"  
 gene 104910..105863  
 /locus\_tag="DMACINML\_00640"  
 CDS 104910..105863  
 /locus\_tag="DMACINML\_00640"  
 /inference="ab initio prediction:Prodigal:2.6"  
 /inference="similar to AA sequence:RefSeq:CAL34285.1"  
 /codon\_start=1  
 /transl\_table=11  
 /product="putative periplasmic protein"  
 /protein\_id="Prokka:DMACINML\_00640"  
 /translation="MKKIFSVLIGATLLYAESSAFGAGDLTSNSPYGLTSSEKLLKE  
 KLDLTSNNAQANSRINEIEQRVEGLQSTLEGINSQYAKSNSRLTQLETNFEAIENNL  
 STELQNLKAYVEESRKIQDANNKQIKKILTELSSLVDSINANYVSKDDLSTNLSIKN  
 TVVPLSTDDKNITSSNENNISVASTQEKEVKQIDDSWKKKKNEILDLAIKDLNNS  
 YENSKIKLNYLIQKQYKPARANFWLGEIEYKQKKYNNNAIVYYKKSSALSTKGDYFPKL  
 LYHTAISLDKIGDPKTANGFYKALKTNYPNSPEAKASPNRK"  
 sig\_peptide 104910..104981  
 /locus\_tag="DMACINML\_00640"  
 /inference="ab initio prediction:SignalP:4.1"  
 /note="predicted cleavage at residue 24"  
 gene 105879..106445  
 /gene="slyD"  
 /locus\_tag="DMACINML\_00641"  
 CDS 105879..106445  
 /gene="slyD"  
 /locus\_tag="DMACINML\_00641"  
 /EC\_number="5.2.1.8"  
 /inference="ab initio prediction:Prodigal:2.6"  
 /inference="similar to AA sequence:RefSeq:EAQ73020.1"  
 /codon\_start=1  
 /transl\_table=11

```

/product="FKBP-type peptidyl-prolyl cis-trans isomerase
SlyD"
/protein_id="Prokka:DMACINML_00641"
/translation="MAIEKNSVSMFYELKDANTNEVLESNLYAQPISFILGKGQILE
ALEEEVMKLDPCSNADVVKKEKGLGEYDENAVQVLPKEQFAGIDLKIGMELFGEGEN
GETVRVTVKEIGDNDVTIDYNHPYAGRDLFSLNIVDARVASEDELLTGIIAGSHSCG
CGSGHGHDDHHGGGGCCGGGGGGCGCH"
gene 106402..107367
      /gene="fabD"
CDS   106402..107367
      /gene="fabD"
      /locus_tag="DMACINML_00642"
      /inference="ab initio prediction:Prodigal:2.6"
      /inference="similar to AA sequence:RefSeq:AVS36599.1"
      /codon_start=1
      /transl_table=11
      /product="[acyl-carrier-protein] S-malonyltransferase"
      /protein_id="Prokka:DMACINML_00642"
      /translation="MDAAVAVAADVATKMNAVFIFPGQGSQSLGMGKDFYENSKTAK
ELLENASDFCKIDFKNLLFNENEDLNKSEFTQPAILLNSLMAYSALSELKPDIAKAFS
LGHSLGEFSALAINGAFSFL EATMLVHKRGLFMQEDCAKVEAGMMVILGLDDKKVEEL
CRKARDEDKKIFAANYNCDGQIVVAGLKPDLASYESVFK EAGAKRAMLLNMSVASHCP
LLENASNKLCIELERILEPNFKAVISNATAKAYTSKQEAL ELLKTQLVAPVLYKQSIK
ACENEADYFIEFGASVLKGLNKKITSKETYALTNMNDIEEFLKVI"
gene 107368..108054
      /gene="pfs"
CDS   107368..108054
      /gene="pfs"
      /locus_tag="DMACINML_00643"
      /EC_number="3.2.2.16"
      /inference="ab initio prediction:Prodigal:2.6"
      /inference="similar to AA sequence:RefSeq:CAL34288.1"
      /codon_start=1
      /transl_table=11
      /product="5'-methylthioadenosine/S-adenosylhomocysteine
nucleosidase"
      /protein_id="Prokka:DMACINML_00643"
      /translation="MKIAILGAMSEEITPLLEILKDYTKLEYANNTYYFANYKNHELI
LAYSIGKVNSTLSASVMIEKFGAQVLLFTGVAGAFNPELEIGDLLYATKLAQYDLDI
TAFGHPLGFVPGNEIFIKTDDKLNLALEVAKELNIKLRAGI IATGDEFICDEAKKAK
IREIFNADACEMEGASVALVCDALKVPCFILRAMSDKAGEKA EFDDEFVINSAKISA
NFVLKMCEKL"
gene 108051..108806
      /locus_tag="DMACINML_00644"
CDS   108051..108806
      /locus_tag="DMACINML_00644"
      /inference="ab initio prediction:Prodigal:2.6"
      /inference="similar to AA sequence:RefSeq:ABS43221.1"
      /codon_start=1
      /transl_table=11
      /product="PP-loop family protein"
      /protein_id="Prokka:DMACINML_00644"

```

```

/translation="MINLSKKLIRQVAQANAKFGLIKDGRVLLGLSGGKDSLALAHL
LKRMQAHAPFKFELEAATLSYGMGEDYSGLHAHCEEHGKHSVIDSNIYEVSGDTIRK
NSSFCSYFSRMRGALYTYALEKGFNKLAIHHLDDAAESFFMNFHNGALRTLAPIY
QSKRGITVIRPLIFVRERQLRDNATQNELQVIGNEFCPGMKLSEKNVKFPHAREEAKQ
LLANLEKEHPKLFTSLKTAFSNLHTESFWLEKA"
gene      108811..109332
          /locus_tag="DMACINML_00645"
CDS       108811..109332
          /locus_tag="DMACINML_00645"
          /inference="ab initio prediction:Prodigal:2.6"
          /inference="similar to AA sequence:RefSeq:CAL34290.1"
          /codon_start=1
          /transl_table=11
          /product="putative hydrolase"
          /protein_id="Prokka:DMACINML_00645"
          /translation="MKKAFVLVDYQNDFIDGSLGFEEKALKIKENILNTLNQIDFNTTH
LLLTYDTHDEDYLRKEGLNLPHEHCIKDSLWQMPKEFTFPLQKAHKVFKNTFGSL
EFANFIAKSEYEEIHFAGLVSHICVFCNIILAFSAKPNRSLILHQNLSASFENLEKS
AFDLLRAYGIEIL"
gene      109332..109946
          /locus_tag="DMACINML_00646"
CDS       109332..109946
          /locus_tag="DMACINML_00646"
          /inference="ab initio prediction:Prodigal:2.6"
          /inference="similar to AA sequence:RefSeq:CAL34291.1"
          /note="hypothetical protein Cj0120"
          /codon_start=1
          /transl_table=11
          /product="hypothetical protein"
          /protein_id="Prokka:DMACINML_00646"
          /translation="MQGFILHTQVKDEDLIVYILSPKELVKAYRFYGLRHSSILNGY
KIDFALDENPSFLPRLKDVHLHGFVWIMDREKMLIWQEFIRLLYHHLKDAQVLESFYF
ELLDECVKRFEKQNPKRVIVDAYLKILEFEGRLHQEFRCFACDESIENPITLIRAFPL
SHHTCALGYAFEKQKLNKFYESKNCAIFGDEEIGNLYQLIKEGL"
gene      109943..110350
          /locus_tag="DMACINML_00647"
CDS       109943..110350
          /locus_tag="DMACINML_00647"
          /inference="ab initio prediction:Prodigal:2.6"
          /inference="similar to AA sequence:RefSeq:CDH61952.1"
          /codon_start=1
          /transl_table=11
          /product="Metal-dependent hydrolase YbeY, involved in rRNA
and/or ribosome maturation and assembly"
          /protein_id="Prokka:DMACINML_00647"
          /translation="MILSDEKCEFLEPIASFSSKDVLFVVEKEMQEINLEQRKQD
KTTDVLSFPLENIDESLPLGSVINIDLAKQKAKELGHSFEEVSLFFIHAMLHLLGF
DHEVDNGEMREKEKELIEHFNLPKSLIIRTLED"
gene      110482..111684
          /locus_tag="DMACINML_00648"
CDS       110482..111684
          /locus_tag="DMACINML_00648"
          /inference="ab initio prediction:Prodigal:2.6"
          /inference="similar to AA sequence:RefSeq:CDH61953.1"

```



```

/codon_start=1
/transl_table=11
/product="FIG00470444: hypothetical protein"
/protein_id="Prokka:DMACINML_00648"
/translation="MINGINSYSSYNYTNTFSNNTSNTKSSNVTNDNSNFVSDKSRV
DKILGYGVDEYGFSTDFNEAAGLPKDYKIFAEGLNMFVNSFLKRQPFYSQIDIAETI
GNTYNSFSSFKDNGLGENLKEQDLQNLQKDGINYWQELQSGNAFIWKLVDENVADL
GSNKYQIQNGEISKGGALVAFFTNNLSFVEGKTTLLGKLAGLNSNTDNDKIKEFLSFM
NANPLKYSYEQEGWGNPMGDSLIIWNYMNRANKLGNDKLTKTIE NLGKEYNQLINADM
SLEEFKTKYLDFKQRHDEFVKSLEEA EKAKGIDYNNPTKSTNNKETSEEDKEKPFKPI
QAESKSETYKDDNKMNELLKLLLETKFGTSDELEILFGMKFSDDNAGEFNKILSLNSA
PKIIDIKA"
gene      111720..111956
          /locus_tag="DMACINML_00649"
CDS      111720..111956
          /locus_tag="DMACINML_00649"
          /inference="ab initio prediction:Prodigal:2.6"
          /inference="similar to AA sequence:RefSeq:CKG68105.1"
          /codon_start=1
          /transl_table=11
          /product="FIG00470444: hypothetical protein"
          /protein_id="Prokka:DMACINML_00649"
          /translation="MIGINSTFNNSFVNLNIKNNNNSSLNSNTNVKNLQDTQDTTKTS
NKVLGYEVDKDGFFTSDFNKAAGLPILHNFHPLK"
gene      112352..112999
          /locus_tag="DMACINML_00650"
CDS      112352..112999
          /locus_tag="DMACINML_00650"
          /inference="ab initio prediction:Prodigal:2.6"
          /inference="similar to AA sequence:RefSeq:EAQ72008.1"
          /note="conserved hypothetical protein"
          /codon_start=1
          /transl_table=11
          /product="hypothetical protein"
          /protein_id="Prokka:DMACINML_00650"
          /translation="MLKKISSALILGSLLVSSAFARDFLAKVSNLSDNSQGVKTLN
FDEMKQVKGGYRVSFKLVANDELLAFKATTPSEIGYYTDNNGDTYYWNSQGLRQFGGM
CGIEVTNCMVNNKHTYANQKRLWETMSIVGDDPYHYLLGYTVKRNIGVSNLQGRFVYF
SYGVAVINEQLGSWYRVNSSAVLNNYQVIKEISSKYKNDMEMALSGNYSRYRNKL"
sig_peptide 112352..112417
          /locus_tag="DMACINML_00650"
          /inference="ab initio prediction:SignalP:4.1"
          /note="predicted cleavage at residue 22"
gene      112996..113784
          /locus_tag="DMACINML_00651"
CDS      112996..113784
          /locus_tag="DMACINML_00651"
          /inference="ab initio prediction:Prodigal:2.6"
          /inference="similar to AA sequence:RefSeq:CAL34229.1"
          /note="conserved hypothetical protein Cj0055c"
          /codon_start=1
          /transl_table=11
          /product="hypothetical protein"
          /protein_id="Prokka:DMACINML_00651"

```

```

/translation="MINSINSLNYNYNTSNFKQDKNIDFKINKHGVAVVTGEGALPY
RGKKFEYNPKIFGLDENISKKDMQEFNNFMKSNALKDPNKIEKSSLKNLGKDDNWDIK
DEDIKLMNFSSYSQMFNLGSDIAIKASNFRNEFNKLLQEDLTLEEFKTKYLDFKQRHD
EFVKEFETAMGDKMLLANNDISMQEDKEKPFKPIQAESKNKETYKDDSKMNELLLKL
LEGKFSTSKELELLFGMKFSDDDAGEFNKILSLNSTPKSIDIKA"
gene 113820..114809
/locus_tag="DMACINML_00652"
CDS 113820..114809
/locus_tag="DMACINML_00652"
/inference="ab initio prediction:Prodigal:2.6"
/inference="similar to AA sequence:RefSeq:CDH61953.1"
/codon_start=1
/transl_table=11
/product="FIG00470444: hypothetical protein"
/protein_id="Prokka:DMACINML_00652"
/translation="MIGINSTFNNSFVNLNIKNNNNSSLNSNTSNNSVKNLQDTQDTT
KTNNKVLGYVDKDGFFTSDFNEKAGIPKDIKHSSTMESLVKISTNEKNPFRAFESI
DIAKTVGNAYKILSQVVGEDVLNSKDSFSLLEEIANFPQGYEFNRQTMQVTKIYNSATD
YLNADIDFDYENTTDTKINKLFFNTTENLMKGSATDIFNNGGEENINTGVFFDTP
SKYTNKDGTITKGLLVAIINENIYTREGEATRQKTEGFDKSMGEEVKKAWNDRNY
NLKLNPNIVQGAGIVDTNENIEFTPLIEIMQKEQKELIKYLQRKQKIDITI"
gene 114829..115425
/locus_tag="DMACINML_00653"
CDS 114829..115425
/locus_tag="DMACINML_00653"
/inference="ab initio prediction:Prodigal:2.6"
/inference="similar to AA sequence:RefSeq:CKG56548.1"
/codon_start=1
/transl_table=11
/product="bacteriocin-type signal sequence
domain-containing protein"
/protein_id="Prokka:DMACINML_00653"
/translation="MLKKISSALILGSLLVSSAFAGDFLAKVSNGLSDNSQGVKALN
LDEMKGQVKGGLVGFKFFKDRPNLISEVYAIADFSEYELSNLNLKGLCGAGDEKCSNPS
RDRLISWLQASANSPAEYRPVYKVKRQIKYSNLGQPYVLFYTGVGVYVNVKNGQIYQYN
SSPMLNNTIMREIAYKYQNSIQDAMGGWNPYFNKIS"
sig_peptide 114829..114894
/locus_tag="DMACINML_00653"
/inference="ab initio prediction:SignalP:4.1"
/note="predicted cleavage at residue 22"
gene 115442..116137
/locus_tag="DMACINML_00654"
CDS 115442..116137
/locus_tag="DMACINML_00654"
/inference="ab initio prediction:Prodigal:2.6"
/inference="similar to AA sequence:RefSeq:CKG56531.1"
/codon_start=1
/transl_table=11
/product="FIG00470444: hypothetical protein"
/protein_id="Prokka:DMACINML_00654"
/translation="MVNFDTQYTNINYLSNNTNKKSVLKNDDDYFNSVIKKFNFSEK
TKEEQGYNGSPDVKEVENS LYKRYMEDKLSKDEIKILNKFQTDYLTGVLDLSALHKRK
VDLLKTLTSMNEFEKIWGAERAQREKQFFNELGKPLTQEDIDKFLANKNNQKEDKEKP
FKPIQAESKNKETYKDDNKMNELLLKLLLEGKFSTSKELELLFGMKFSDDDTGEFNKIL

```

gene SQNTSAKIIDIKA"  
 116173..117399  
 /locus\_tag="DMACINML\_00655"  
 CDS 116173..117399  
 /locus\_tag="DMACINML\_00655"  
 /inference="ab initio prediction:Prodigal:2.6"  
 /inference="similar to AA sequence:RefSeq:CDH61953.1"  
 /codon\_start=1  
 /transl\_table=11  
 /product="FIG00470444: hypothetical protein"  
 /protein\_id="Prokka:DMACINML\_00655"  
 /translation="MIGINSTFNNSFVNLNIKNNNNSSLNSNTSNNSVKNLQDTQDTT  
 KTNNKVLGYEVDKDGFFTSDFNEAAGIPKDYKIYAKGAENFVNYITNLNFKSFTNIDI  
 AKSLGNAYKVFSQLIDEPSGNFTTEDLSKIPLGFSYDKKSFQVENIYQTQKEFDSALS  
 ANNNLQIYQSPKQLALSFPWNENSPNDYTKKNSDIFAPSSHIDIGASFYKNDNGTIS  
 KGGVLMFAFFAGMSGQNPLIEGETTIAGKLNQYDKNISQSQVEDLNEFIKQNPICYGIT  
 GDIGTDFINVLKLNKNSIDIDEFKKQWLEMKAKSDEMGEVYKAKQKEVISSQETSEED  
 KEKPFKPIQAESKSETYKDDNKMNELLKLLLETKFGTSDELEILFGMKFSDDNAGEFN  
 KILSLNSTPKSIDIKA"  
 gene complement(117420..118346)  
 /locus\_tag="DMACINML\_00656"  
 CDS complement(117420..118346)  
 /locus\_tag="DMACINML\_00656"  
 /inference="ab initio prediction:Prodigal:2.6"  
 /inference="similar to AA sequence:RefSeq:CAL34294.1"  
 /codon\_start=1  
 /transl\_table=11  
 /product="putative tRNA-dihydrouridine synthase"  
 /protein\_id="Prokka:DMACINML\_00656"  
 /translation="MIDFSKKPLFLAPMAGFSDLPFRNVVKKFGADITISEMISSNAL  
 VYESSKTLHMLERALENPYIVQIAGGDKEVLKAVQMLNEMDFVDGIDFNCGCPVVK  
 VKQCAGSALLELELFKSLVGVIKENKSLTSVKFRLGFNEKYPEKMAKICESLGV  
 DFVSIHGRTRKQLYSGKADYDSIASAKASVKIPVIANGDINAQNAKEVYEITKCDGLM  
 IGRASVGNPWIFYEIKSGKNVDEKLKKEIILTHFDEMIKHYKDQGVSIKHLHEYSK  
 GHKDAFRDVSNRIDNVEEMRKKIEEFFSLT"  
 gene complement(118343..119329)  
 /locus\_tag="DMACINML\_00657"  
 CDS complement(118343..119329)  
 /locus\_tag="DMACINML\_00657"  
 /inference="ab initio prediction:Prodigal:2.6"  
 /inference="similar to AA sequence:RefSeq:CAL34295.1"  
 /codon\_start=1  
 /transl\_table=11  
 /product="putative membrane protein"  
 /protein\_id="Prokka:DMACINML\_00657"  
 /translation="MRIRLFFIASFIYIALIFALAWYLELGNLNTNFNTYSFELPIMI  
 WLILPLIPLVFFAIHMGFYFLLTLKFKHFFKDSTKFENFTRDLLLEKESNISFQTK  
 EFRQVAQLAKTLKTHEKIPNANKINEILDIDGKKEEYFNLNKFKLENNNIFLENE  
 KNHIKNDINYASKIKNLSQTQDEFQDLAFESLIKKGTYEQIKNIKITKPKCHILTLI  
 KRFKEGNLELNTAEYEVLLSHNILGEKDYLIDIAKLSTKLLNPDALIGIFNKIKNEKGE  
 ALRAYLYLLAEFGLLDELREQIHNDKKFNDFKAFLTLREKNIKIDLNQLIQ"  
 gene complement(119326..119679)  
 /locus\_tag="DMACINML\_00658"  
 CDS complement(119326..119679)

```

/locus_tag="DMACINML_00658"
/inference="ab initio prediction:Prodigal:2.6"
/inference="similar to AA sequence:RefSeq:CAL34296.1"
/note="hypothetical protein Cj0125c"
/codon_start=1
/transl_table=11
/product="hypothetical protein"
/protein_id="Prokka:DMACINML_00658"
/translation="MKKNEIQVFKTILENRKKTILENLQSNSKEIEALHNSVPSDSVD
FSVIETGSQIDFAISANLKQELEEIEDSLEKIKDGTYGICESCDEEIAIERLKIKPHA
KYCIVCRENLEKGEL"
gene complement(119691..120140)
CDS /locus_tag="DMACINML_00659"
complement(119691..120140)
/locus_tag="DMACINML_00659"
/inference="ab initio prediction:Prodigal:2.6"
/inference="similar to AA sequence:RefSeq:CAL34297.1"
/note="conserved hypothetical protein Cj0126c"
/codon_start=1
/transl_table=11
/product="hypothetical protein"
/protein_id="Prokka:DMACINML_00659"
/translation="MQVNIFHIQKNDEFKIEWGEKYAKLISKFADLKEHNLFNKKIAAA
QNLNAQAAKLSYEEAFAPYTKGFCIVLDERGKELTSVEFSKLIADKNNLNFFIGGAYG
LRDEFSQSLDFRLSLSKLTLAHQFVKILLLEQIYRAFCINSNHPYHK"
gene complement(120142..120984)
/locus_tag="DMACINML_00660"
/EC_number="6.4.1.2"
/translation="MNFAIFSKIRRQQPSTKEAPNHVWKCQSCHALMYEIESCFN
VCPKCSYHMRISPMDRIKLLSDENTFVEYDANLEAIDPLKFVDSKSYKKRLSEGESKT
GRKSAVISGECLIDGLKTQLVVFDFSMGGSLGSVEGEKIVRAIQRAITDKTPVVIIVS
ASGGARMQESTYSLMQMSKTSAAKLLSKEKLPYISVLTDPMTGGVSASFAWLGLDII
AEPGALVGFAGARVIKQTIGADLPEGFQKAEFLLEHGLIDAIVERSDMKKYLSDTLKF
FCGK"
CDS /locus_tag="DMACINML_00660"
/EC_number="6.4.1.2"
/inference="ab initio prediction:Prodigal:2.6"
/inference="similar to AA sequence:RefSeq:CAL34298.1"
/codon_start=1
/transl_table=11
/product="acetyl-coenzyme A carboxylase carboxyl
transferase subunit beta"
/protein_id="Prokka:DMACINML_00660"
/translation="MNFAIFSKIRRQQPSTKEAPNHVWKCQSCHALMYEIESCFN
VCPKCSYHMRISPMDRIKLLSDENTFVEYDANLEAIDPLKFVDSKSYKKRLSEGESKT
GRKSAVISGECLIDGLKTQLVVFDFSMGGSLGSVEGEKIVRAIQRAITDKTPVVIIVS
ASGGARMQESTYSLMQMSKTSAAKLLSKEKLPYISVLTDPMTGGVSASFAWLGLDII
AEPGALVGFAGARVIKQTIGADLPEGFQKAEFLLEHGLIDAIVERSDMKKYLSDTLKF
FCGK"
gene complement(120999..121715)
CDS /locus_tag="DMACINML_00661"
complement(120999..121715)
/locus_tag="DMACINML_00661"
/inference="ab initio prediction:Prodigal:2.6"
/inference="similar to AA sequence:RefSeq:CAL34299.1"
/codon_start=1
/transl_table=11
/product="putative inositol monophosphatase family

```

```

protein"
/protein_id="Prokka:DMACINML_00661"
/translation="MKQFLDACLKANLQISKYLNNICESDLFSPDLGFDNNQSYKLD
LKCEKIFTEYLSDLGQIFSEESGLIGENSPYKIIILDPLDGSSNFVSKIPFYGTSAALF
KDEEAQSAFICNLANNEILIFDDNKNLKS NFLPNYSPFLPNRFSQIGIVEKITLCPN
LINYLAKNKLKFRSLGATALSIAYAPYFSFVLVLGKTRVFDTAGALMLCKNLYIENNE
NFLISKDKKIFDIILEFLK"
gene      complement(121715..123931)
          /locus_tag="DMACINML_00662"
CDS       complement(121715..123931)
          /locus_tag="DMACINML_00662"
          /inference="ab initio prediction:Prodigal:2.6"
          /inference="similar to AA sequence:RefSeq:AON66352.1"
          /codon_start=1
          /transl_table=11
          /product="outer membrane protein assembly complex, YaeT
          protein"
          /protein_id="Prokka:DMACINML_00662"
          /translation="MKKIISICALVALSNAAVIKEIKFSGLNHLSNASALNLTGLKIG
          ETINLDKINTAILNLYKQNYFENIAVEEDNGVLNIIIVTEKPSIAKISITGIASNDRKQ
          VESILGIKRGTLFDEASAKEASERIKAYYEAKSYFDTIVEYRKKLTLENTEGLELEFIV
          NRGENI IINNVL SGA EKFSYSDIEPAIVNKEKEFMGMMWGRNDGK LKIFELSND SAR
          ISDEYMKKGYLDVQVSSPYLKTYTDYQANLTYFIKEGKPYKIQSISIENPLFSEEN
          KQNL ENLRSTQGKLINIEDIRKDVKT IETQSADLGYAFAEVYPDIQKNDQTQEATVVF
          KVIPHDKVYIRNVIISGNSRTVDRVVRRELYITEGNLYNRTDLSESTNLRRTSYFDD
          VEIKEEKVDDTHIDLIVNVKEASTGAISGGIGYGSSDGLLLNASLSDTNIFGSGIKSS
          VSVDKSDDTLSGRISLINPRILDSQYSLGGTLYSNDYEWDNYSEKNYGF DITLGRQFA
          RYYNVSLTYNLEQSDIYHLSPTLLRTGYELGKTIKSSVTPAITFNNTDDYYLPRKGII
          ASTSLEYAGLGGDQEF LSSSTKFNFYQGLEDYIGYDLIYRYKASFYKVVWDEGYLPINQ
          RIYLG GIRSLRGFESRTVSPKNEWGDEVGGTIAFANSVELSFPLIDRIKLRGSVFFDY
          GMIGNKNLDEIQRMSTGLGIEWITPIGPLQLVFAKPLNDKKGDDTNTFEFNLGTRF"
gene      124007..124834
          /gene="tyrA"
          /locus_tag="DMACINML_00663"
CDS       124007..124834
          /gene="tyrA"
          /locus_tag="DMACINML_00663"
          /EC_number="1.3.1.12"
          /inference="ab initio prediction:Prodigal:2.6"
          /inference="similar to AA sequence:RefSeq:CAL34301.1"
          /codon_start=1
          /transl_table=11
          /product="putative prephenate dehydrogenase"
          /protein_id="Prokka:DMACINML_00663"
          /translation="MKVAIIIGLGLIGGSLGLCLKENKLISCVYGLDSNKENEQDALKL
          GLVHELIEFENLHLC DMIF IATPVNAIIIEILQKLVDLPSNITIIELGSTKRKIIIEKLP
          AKLTKQTLFAHPMAGTENS GPKAAFKELYKDAVCVLC DSEVADDLHQKRAVEIFSHLG
          MRIVFMDSTAHDHHAII SHLPHVISFSLANFVMKEEDKRNIVHLAGGSFKGMSRIAK
          SSPIMWGSIFEQNKDNVLS SIEFFQKELEFCKKMIEEDKNEELKSWMQANTLREIL"
gene      124931..126304
          /locus_tag="DMACINML_00664"
CDS       124931..126304
          /locus_tag="DMACINML_00664"
          /inference="ab initio prediction:Prodigal:2.6"

```

```

/inference="similar to AA sequence:RefSeq:CAL34302.1"
/codon_start=1
/transl_table=11
/product="putative peptidase M23 family protein"
/protein_id="Prokka:DMACINML_00664"
/translation="MARKKGFYLYLLILVLIGALAFFASKMNGFETTPPKILMPDII
YSDLKKPISVHVKDDDEGFIESVQIFLQKEGNGTGMLIVDEKIQNSNDITLQVALPKLA
YKEKVKSFIMEIKARDNSFWNFNGNEASKKVLVMIDDSAPKVNILSNSYQIEQGGAA
SVVFSASDANLDKVYIETNTGKIFKATPYLKEGYAALIARDARDEEFRAYIIATDKA
GNITKERIRYFVNRKYRVSINLDRFLDGGKIEDLAQEYAPKDNFTRFEKFKFVNE
TLRDNNEILIHKITSEVPESKIDNFKIDLFLPLRNGMKVADFADHRYYSYNGQFVSDS
YHMGIDLASVAEAPIISNPGKVFAEENGIYGLNLIVYHGFVYSLYGHCSSKNVEI
DEILSKKSVIGRTGVSGLALGDHLHFGVLVQGVETRPEQWQDKKWIENNIYNVLNEGK
KIILGKN"
gene 126304..127188
      /gene="lpxC"
      /locus_tag="DMACINML_00665"
CDS 126304..127188
      /gene="lpxC"
      /locus_tag="DMACINML_00665"
      /EC_number="3.5.1.-"
      /inference="ab initio prediction:Prodigal:2.6"
      /inference="similar to AA sequence:RefSeq:CAL34303.1"
      /codon_start=1
      /transl_table=11
      /product="UDP-3-O-[3-hydroxymyristoyl] n-acetylglucosamine
deacetylase"
      /protein_id="Prokka:DMACINML_00665"
      /translation="MKQLTLAKAVKGVGIGLHKGEPIEITLEPLEANSIVFFRSDLN
ATYKASPENVINTQMATVLGDERGFISTIEHLMSAINAYGIDNVRIVLNANEAPVMDG
SSISFCMMLDEAGVKELDAPKKIMVIKKPIEVRDGDYVRLTPTKEPRINYTIKFDNA
VIGEQSYNFESKKNYIENIARARTFGFLKDVQALRDMNLALGGSLNENTIVVDDNRIL
NPEGLRFKDEFVRHKILDAIGDLTLGVRVFGDYISYAGSHHLNHLTKVEVLKDKDAY
EIVTLEKANEKAYEKVFA"
gene 127227..127628
      /locus_tag="DMACINML_00666"
CDS 127227..127628
      /locus_tag="DMACINML_00666"
      /inference="ab initio prediction:Prodigal:2.6"
      /inference="similar to AA sequence:RefSeq:ADN90360.1"
      /codon_start=1
      /transl_table=11
      /product="hypothetical protein"
      /protein_id="Prokka:DMACINML_00666"
      /translation="MIGVYQDDKLVKSIIESEEKASEFVFPKILKILLKEFSFDELIYAN
GPGSYMGIKISYVSLSTLSIVKNIPLFAISAFELNSNQPIAAHKNMCFVKKEDDEIILE
ENTAGEFFLPPNLSKLNKKDDNLPFYFLSAI"
gene 127646..128524
      /gene="thrB"
      /locus_tag="DMACINML_00667"
CDS 127646..128524
      /gene="thrB"
      /locus_tag="DMACINML_00667"
      /EC_number="2.7.1.39"

```

```

/inference="ab initio prediction:Prodigal:2.6"
/inference="similar to AA sequence:RefSeq:CAL34305.1"
/codon_start=1
/transl_table=11
/product="putative homoserine kinase"
/protein_id="Prokka:DMACINML_00667"
/translation="MKILVPATSANLPGFDCLGLSLALFNHTIIEKSNFFSISVNGE
GSENLKNNIFVSIFNEIYQRLSGRKDHFIFDNTIPLSRGLGSSSAVIIGAIAS
AYEMAGFKADKEKILNEALKYENHPDNIAPAALGGFVSVVENEKVFSSIKKDLDENLN
AVVIVPNVAMSTEQSRNALPSNLSLKDSVFNLCSSFLTACFLEKKYDLLALASKDLL
HQTRRMQNLPELFEVQKFALENKALMSTLSGSGSSFFSLAYKDDAKHLAQKMEQKFGH
FKVLCLEFDNKGFKIC"
gene      128518..128811
          /locus_tag="DMACINML_00668"
CDS       128518..128811
          /locus_tag="DMACINML_00668"
          /inference="ab initio prediction:Prodigal:2.6"
          /inference="similar to AA sequence:RefSeq:CAL34306.1"
          /note="conserved hypothetical protein Cj0135"
          /codon_start=1
          /transl_table=11
          /product="hypothetical protein"
          /protein_id="Prokka:DMACINML_00668"
          /translation="MLKKEKKRYNFTKDKHEPIRMCIVCKNRYLQKSMHRFKHFQGEL
YKDFDFGRSVYLCETCILSEGKVLQKAFFRSCKNLNTKITQQLKEIVLNGKN"
gene      128798..131368
          /locus_tag="DMACINML_00669"
CDS       128798..131368
          /locus_tag="DMACINML_00669"
          /inference="ab initio prediction:Prodigal:2.6"
          /inference="similar to AA sequence:RefSeq:AJK82078.1"
          /codon_start=1
          /transl_table=11
          /product="translation initiation factor IF-2"
          /protein_id="Prokka:DMACINML_00669"
          /translation="MAKIRIHEIAKELGYDSKEIIEKANELGLNIKTASNAVEPEVAA
GIYEYIQTKIPEAFKKNLQDPIDKAKAAPKEEKKEEKPSKEVEVKAPAKVVEEAKP
EPKSPEGPKENIQESLASATLAKRRGLVIVKKKKDEEEAAKKEPKATTPSNEERLSL
KTMFSNADENLKKKKKEKPFVATKKESAEMDFLEGHDFADISLEDEDVVVLPDFSV
KEQEKPNQNTMCKPPNLRQSVGNANLGLLEGGIQRSSRKKPKKVEKKENEAVSSVEI
SKEIRVYEFADKIGKSVSEVSKLFMLGMMTTKNDFLDEDAIEILAAEFGIEINIINE
ADEFDYVKDYEEVEDEKDLVSRAPVITIMGHVDHGKTSLLDYIRKSRVASGEAGGITQ
HVGAYMVEKNGRKITFIDTPGHEAFTAMRARGASITDIVIIVVAADDGVPQTKEAIN
HAKAAGVPPIIIAINKMDKEANPDMVKTQLAEMEIMPVEWGGSYEFVGVSAKTGMGIE
DLLEIVLLQADILELKANPKSFAKASVIESSIQKGRGAVATIIIVQNGTLKVGSTIVAG
EAYGKVRAMSDDQGKALKEIKPGECGVIVGLSEVADAGEILIAVKSDEAREYANKRH
EYNRQKELSKSTKVSIDELGAKIKEGNLKPVILKADVQGSLEALKASLEKLRNDEI
KVNIHSGVGGITQSDIELASASENSIVLGFNIRPTGEIKERAKDKGVEIKTYNVIYN
LLDDVKALLGMMSPHISEEQLGQAEIRQVINVPKIGQIAGCMVTEGVINRGAKIRLI
RDGVVYEGNVSSLKRFKDDAKEVAKGYECGVGIEGCDDMRVGDYIESYKEVEEQASL
"
gene      131365..131724
          /gene="rbfA"
          /locus_tag="DMACINML_00670"

```

CDS 131365..131724  
 /gene="rbfA"  
 /locus\_tag="DMACINML\_00670"  
 /inference="ab initio prediction:Prodigal:2.6"  
 /inference="similar to AA sequence:RefSeq:CAL34308.1"  
 /codon\_start=1  
 /transl\_table=11  
 /product="putative ribosome-binding factor A"  
 /protein\_id="Prokka:DMACINML\_00670"  
 /translation="MNPSEIKKLRTESILKELIPEALANLDDENLKNLCVVDVECKKG  
 RYDAFVYLDKMFNTHEQEKILNSLKKASRALQNYCMSEQGWYRCPNFHFKFDDRLEY  
 QNHMDALFEKIKKDKNE"

gene 131717..132604  
 /gene="ctkA"  
 /locus\_tag="DMACINML\_00671"

CDS 131717..132604  
 /gene="ctkA"  
 /locus\_tag="DMACINML\_00671"  
 /EC\_number="2.7.11.1"  
 /inference="ab initio prediction:Prodigal:2.6"  
 /inference="similar to AA sequence:UniProtKB:Q9ZKJ5"  
 /codon\_start=1  
 /transl\_table=11  
 /product="Serine/threonine-protein kinase CtkA"  
 /protein\_id="Prokka:DMACINML\_00671"  
 /translation="MNNFYEILQFNSKQFIEPLGTKEKFWIQDKKYLFKIGRENTLEN  
 CSEKIACEIAKLINLPCA EYELAVYKNGNISYGVASRNFLNSTSNLVLGNELLSETLQ  
 EYDKNAKYKLLKTYLDNVLSLHVFLDNPSILENMIGCLVDFVFIGNQDRHHENWGIVF  
 DEKTRINLAPSFDAAGIASKISEEA KIKLQTKDKNQV LAYCLKSNSAFCDSEGR  
 RLK NLDVLKNILNKREQNISTFAKQWIDKIVSVDQSACSNIIDKIPNEFIGEFQELFI  
 LEMLNINKKLICDLVRENI"

gene 132601..133314  
 /locus\_tag="DMACINML\_00672"

CDS 132601..133314  
 /locus\_tag="DMACINML\_00672"  
 /inference="ab initio prediction:Prodigal:2.6"  
 /codon\_start=1  
 /transl\_table=11  
 /product="hypothetical protein"  
 /protein\_id="Prokka:DMACINML\_00672"  
 /translation="MILKVCWRSSKAKKWFFIGELSYENNRKYFVYDENIYEAQEQGF  
 ELFTNLSDVKLNYSYELFPVFANRLLSKSRSEYKQEWLDLKDDKNPLEELSKNNG  
 FRVVDFIALYLIPKVQKQYVVEFFLHNVCIF EYQKCLNQIKQGDNLYLAKDIQNKFD  
 KNAILVRTKDPMSILGYIPRIYNEDIASILAYDENATLSIKKINKDAPVQFQILCRFE  
 AKWPKNFIAFDTRKDKNES"

gene 133304..133747  
 /locus\_tag="DMACINML\_00673"

CDS 133304..133747  
 /locus\_tag="DMACINML\_00673"  
 /inference="ab initio prediction:Prodigal:2.6"  
 /inference="similar to AA sequence:RefSeq:AGV48750.1"  
 /codon\_start=1  
 /transl\_table=11  
 /product="ribosome maturation protein RimP"



```

/protein_id="Prokka:DMACINML_00673"
/translation="MNLEALCKEVNLELYDSELTSENGKKIYRVVYMKPLDEKGERKG
VNLDDCARLSEILSPIFDVEPPVSGEYFLEVSSAGLERKLSKIEHFAKSINELVKITT
NEKEKIEAKIISVEDENITLENLENQEKTTLKFSDIKKARTFVEW"
gene complement(133757..134743)
/locus_tag="DMACINML_00674"
CDS complement(133757..134743)
/locus_tag="DMACINML_00674"
/inference="ab initio prediction:Prodigal:2.6"
/codon_start=1
/transl_table=11
/product="hypothetical protein"
/protein_id="Prokka:DMACINML_00674"
/translation="MLIHDKKFDINLKFYFFMKYLVKINFSDTQITNILYHISKNETS
LYKCLKQHINLNTKNGISQWNYLEQIIYEVRNNIDFNVFIFALKIYSIKNFLLELAKIR
QRNNIIRLSKIDPLSLEYDKITIYNPYSTRVNGALLALTFNHIDNNQFFHDNIDKEY
FASICQLSQELKKGLEPNQIFMLIFNESINQSIISNSGSNYESRILEKLESIGINQE
AIIKKHDENDSSTEFDFFFNLNGKSYGIGAKRTL RERYKQFIKTVQMSTIDVMIEITL
GLDLGEEKAKAIRNHGVYLIVSDEIYEQNKFLQNIIDGVFGSSQFTLELLENL"
gene complement(134730..135695)
/locus_tag="DMACINML_00675"
CDS complement(134730..135695)
/locus_tag="DMACINML_00675"
/inference="ab initio prediction:Prodigal:2.6"
/inference="similar to AA sequence:RefSeq:ASE91810.1"
/codon_start=1
/transl_table=11
/product="DNA (cytosine-5-)-methyltransferase"
/protein_id="Prokka:DMACINML_00675"
/translation="MINNTDKLKAIDL FAGIGGIRIGFKNIFQEKLEFVFSSEIDKFA
CQTYFCNFNELPHGDITQINENDIPKHNILLAGFPCQAFSIAGHRKGFNDIRGTLFFD
VARIAKKHKPEIIFLENVKGFKNHDKGKFTVVKNTLEDMGYDVFSEVLNARNFGIPQ
NRERIYIVAF LKNKFNISFSFNELKNIKIKSKLGDILEKNIDEKYTISDKLWAGHQ
RKLEHAKKGNFGYSLFNHDSEYTSTISARYYKDGSEILIEQKNKNPRKLTPREAARL
QGFPNSFKITTSDNQSYKQFGNSVAIPVIENIAKLIHKELYNANT"
gene 135914..136225
/locus_tag="DMACINML_00676"
CDS 135914..136225
/locus_tag="DMACINML_00676"
/inference="ab initio prediction:Prodigal:2.6"
/inference="similar to AA sequence:RefSeq:APA48481.1"
/codon_start=1
/transl_table=11
/product="restriction endonuclease"
/protein_id="Prokka:DMACINML_00676"
/translation="MLKPDLYIENKMILDAKWKIPDSNEDKKHGIAQSDLYQMFAYAC
KFKIHDIKLIYPLCERTMNLQNTIKELFNANEHLAFLNDNSLLKTNIKVQVIFAPLP
F"
gene complement(136214..137020)
/locus_tag="DMACINML_00677"
CDS complement(136214..137020)
/locus_tag="DMACINML_00677"
/inference="ab initio prediction:Prodigal:2.6"
/inference="similar to AA sequence:RefSeq:CAL34312.1"

```

```

/codon_start=1
/transl_table=11
/product="putative ABC transporter integral membrane
protein"
/protein_id="Prokka:DMACINML_00677"
/translation="MFEILNFTFFQNALLAAILVSIACGVVGLTVMINRLFISIAGGIT
HGAFGGIGIAFYFSLPILISTGIFTLFLAFLVAFLSKRYEHRSDSIVAVIWAFGMAFG
IILIDLSPGYSTDLMAYLFGNILAVGMQDLWLMAIVDGVVIVLMLLFYRQFEALSFDV
EFAKVRGINTSFFHYLLIALMAFCIVISIRLVGIILIMALLSIPSFIAENFTKKLGLI
MILASVLSMIFCVLGLIISYFFNLSSGACIIAVACFGFLIHLLAKFLLKR"
gene complement(137013..137867)
/locus_tag="DMACINML_00678"
CDS complement(137013..137867)
/locus_tag="DMACINML_00678"
/inference="ab initio prediction:Prodigal:2.6"
/inference="similar to AA sequence:RefSeq:CAL34313.1"
/codon_start=1
/transl_table=11
/product="putative ABC transporter ATP-binding protein"
/protein_id="Prokka:DMACINML_00678"
/translation="MLFFEISNLNYAYNNETILKNINLSYDSKDFLSIIGPNGAGKST
LVKLILGLLKTKKTINFHGLKKEIGYVQPHTLANPNFCPRVIEIVLMGLVNKKIFGF
YSKKDKNKALEALASVGMQDFWDRKINELSGGQKQRFVIARALVDECKMLILDEPTAS
VDSKSAIQIFELLSSLHEKGIGILLICH DINLVLA YSDK IAYLNKELFLHTNTKEKDK
SVFLKHL YENHSHFC DVEMSLN SCFCDEENCEKKKICEQEFARRNLKKS NFKKENFCL
KFSKESHV"
gene complement(137881..138735)
/locus_tag="DMACINML_00679"
CDS complement(137881..138735)
/locus_tag="DMACINML_00679"
/inference="ab initio prediction:Prodigal:2.6"
/inference="similar to AA sequence:RefSeq:CAL34314.1"
/codon_start=1
/transl_table=11
/product="putative periplasmic solute binding protein for
ABC transport system"
/protein_id="Prokka:DMACINML_00679"
/translation="MKKIFLFFIFLGLFKSFLYAKTLQPSENPNLPLISVSIAPQAFF
VKKIADDTLNINILSTNTHKPKSKSNPMKKLEKSELYFTIGLEFEKNLTDK LKQKFPK
LEIIDMQKDIPLAKTSSSNSKEILD PFTWLDPILVQNIALNTYNALVQKYPQNKSLYK
RNLDKFLTEL DVLN LQISSKLQKVKNKEFITYHPAWSYFAKRYNLVQNHVEFLGK LK
NEDLKNL GALIKDKNIKVIFVQTHFPENTAKTLEKEYNVKIKIDYLSYDWENELLKT
ANAFYENL"
gene complement(138906..139844)
/locus_tag="DMACINML_00680"
/locus_tag="DMACINML_00680"
/EC_number="1.8.1.9"
CDS complement(138906..139844)
/locus_tag="DMACINML_00680"
/EC_number="1.8.1.9"
/inference="ab initio prediction:Prodigal:2.6"
/inference="similar to AA sequence:RefSeq:CAL34317.1"
/codon_start=1
/transl_table=11

```

```

/product="thioredoxin reductase"
/protein_id="Prokka:DMACINML_00680"
/translation="MLDVAIIGGGPAGLSAGLYTTRGGLKNVVMFEKGMPPGGQITSSS
EIENYPGVAQVMDGISFMAPWSEQCMRFGLKHEMVGVEQISKNEGDSFTIKLEGGKTE
LAKAVIVCTGSAPKRAGFKGEDEFFGKGVSTCATCDGFFYKNKEVAVLGGGDTALEEA
LYLANICKSVYLIHRRDEFRAAPSTVEKVKKNEKIELITSASIDEVYGDKMVGTGVKV
KLKDGSIKDLNVPGIFTFVGLNVRNEILKQDDGKFLCDMEEGGQVSVNLKMQTSVPG
FAAGDLRKDAPKQVICAAGDGAVAALSAMAYIESLH"
gene complement(139979..140293)
/locus_tag="DMACINML_00681"
CDS complement(139979..140293)
/locus_tag="DMACINML_00681"
/inference="ab initio prediction:Prodigal:2.6"
/inference="similar to AA sequence:RefSeq:CAL34318.1"
/codon_start=1
/transl_table=11
/product="thioredoxin"
/protein_id="Prokka:DMACINML_00681"
/translation="MGKYIELTSDNFAQAKEGVALVDFWAPWCGPCRMLAPVIDELAN
DFDGKAKICKVNTDEQGLAAEFGVRSIPTLIFFKNGEVVDQLVGAQSKQAISDKLNS
LL"
gene complement(140348..140686)
/locus_tag="DMACINML_00682"
CDS complement(140348..140686)
/locus_tag="DMACINML_00682"
/inference="ab initio prediction:Prodigal:2.6"
/inference="similar to AA sequence:RefSeq:CAL34319.1"
/note="conserved hypothetical protein Cj0148c"
/codon_start=1
/transl_table=11
/product="hypothetical protein"
/protein_id="Prokka:DMACINML_00682"
/translation="MGFASYLSGILGEDKACEFLKKQKFEILKRNFRSKFGEIDIIAR
KDGILHFIEVKFTQNNYEVSERLNIKKYERILKTIEFYELKHGILNDFQIDLICISDD
MIQFFENISF"
gene complement(140686..141936)
/locus_tag="DMACINML_00683"
CDS complement(140686..141936)
/locus_tag="DMACINML_00683"
/EC_number="1.1.1.3"
/inference="ab initio prediction:Prodigal:2.6"
/inference="similar to AA sequence:RefSeq:CAL34320.1"
/codon_start=1
/transl_table=11
/product="homoserine dehydrogenase"
/protein_id="Prokka:DMACINML_00683"
/translation="MKVAILGYGVGSAVARVLIQNKEIIRARCGQDIIPVIALAKSQ
KENPLIPIVTNVDEILQRDDIDVFVELMGGVETPFKIISEILKKNKPVVTANKAMLAY
HRYELEELAKNTTFGYEASVAGGIPIIKALKEGLSANNILSIEGILNGTSNYILSAMN
SKGLNFDDVLKKAQELGYAEADPTFDIEGQDAAHKLLILASIAYGLRAKPEDILIEGI

```

SKISAEDMYFAKEFDFTIKLLGIAKAQNSTVELRVHPTMINKDKMIAKVDGVMNAISI  
 VSDILGESLYYGAGAGGDATASAVIADLMDIARNEPKGPMMGFENLNFKLLNKDEIY  
 TKYYLRKLVEDKTGVLSKITQLMSENNISIDSFLQPKQGEIYSTLFFTTHTFEKSI  
 QNLLSILEKQDFIKAKPFMMRIEE"

gene complement(141938..143143)  
 /locus\_tag="DMACINML\_00684"

CDS complement(141938..143143)  
 /locus\_tag="DMACINML\_00684"  
 /EC\_number="2.6.1.1"  
 /inference="ab initio prediction:Prodigal:2.6"  
 /inference="similar to AA sequence:RefSeq:CAL34321.1"  
 /codon\_start=1  
 /transl\_table=11  
 /product="aminotransferase"  
 /protein\_id="Prokka:DMACINML\_00684"  
 /translation="MFDEIRFNTIERLPNYVFAEVNAIKMAARRAGKDIIDFSMGNDP  
 GKTPQHIIDKLCEANKDKTSGYSTSMGIYKRLAICNWKYKYGVNLDPENEVATM  
 GSKEGFVNLARAIINPGDVAIVPAPAYPIHTQAFIIAGGNVAKMPLKYNEKFELDENK  
 FFEDLDKTLHESIPRPKYVVVNFPHNPTTVTCEKSFYERLVATAKKERFYIISDIAYA  
 DLTYDDYKTPSILEVEGAKDVAVETYTLSSYNMAGWRVGFVGNKRLVAALKKIKSW  
 FDYGMYPPIQVAATVALDGDQSCVDEIRATYDKRMHILLEAFENAGWKLHKPRASMFV  
 WAKLPESKMHLKSLEFSKQLLQHAEVAVSPGIGFGEAGDEYVRIALIENENRIRQAAR  
 NIKKYLKEE"

gene complement(143156..143962)  
 /locus\_tag="DMACINML\_00685"

CDS complement(143156..143962)  
 /locus\_tag="DMACINML\_00685"  
 /inference="ab initio prediction:Prodigal:2.6"  
 /inference="similar to AA sequence:RefSeq:CAL34322.1"  
 /codon\_start=1  
 /transl\_table=11  
 /product="putative periplasmic protein"  
 /protein\_id="Prokka:DMACINML\_00685"  
 /translation="MVKKIFIFLFLANSVFAVSSLELAKNLVANPSKDSQLRLLFPDS  
 SYIDNKGNDIAKISRILKTNLNLTLSDPQTLRLNFKAKADSVVFFKILTDALTNL  
 GYIYFIPTDMILRDGNIDYTIQVESQYILDPGALYSLLKDNSVYIDNIKRIGTYDYEY  
 DLNFENAQLNTNIDLKLNSTQTLERPLKDYVFTLQGASNLIIAHDADFVFPKVLFLD  
 KNLNLKAIKSQAQNNHFSELIPSGAVYAIVSDMYNLDNIRRGLKITLKK"

sig\_peptide complement(143888..143962)  
 /locus\_tag="DMACINML\_00685"  
 /inference="ab initio prediction:SignalP:4.1"  
 /note="predicted cleavage at residue 25"

gene complement(143956..144900)  
 /locus\_tag="DMACINML\_00686"

CDS complement(143956..144900)  
 /locus\_tag="DMACINML\_00686"  
 /inference="ab initio prediction:Prodigal:2.6"  
 /inference="similar to AA sequence:RefSeq:CAL34323.1"  
 /codon\_start=1  
 /transl\_table=11  
 /product="putative membrane protein"  
 /protein\_id="Prokka:DMACINML\_00686"  
 /translation="MLNWKKIEDLNLKEVAARTKIELDFLEALVKKDFVTLNRFNVRG  
 FVKILSREYELDFTFNEEFETYLNENNLNDTAKPKIITPKLDAYTQKSTGFVSFIVI"

VIIILALVGFGIYYFDYIKSFFQNDQNNSSAAVVDIIGQAQSNLKALENNVVVIDNQAE  
ENETEANLTQIQNTELNNTKEEIKQISTTQNNTNAKEENLSTNDSLATTNQEVELTK  
APNKEAHFKASGKIWIWGLIDLSNYRKTGLVKENDFNLSLEVNRLVLTGAAALSVDEN  
GKEQKFPAGNSKRFLIKDGKITSISAAEFMKNLKGKEW"

gene complement(144893..145576)  
/locus\_tag="DMACINML\_00687"

CDS complement(144893..145576)  
/locus\_tag="DMACINML\_00687"  
/inference="ab initio prediction:Prodigal:2.6"  
/inference="similar to AA sequence:RefSeq:CAL34324.1"  
/codon\_start=1  
/transl\_table=11  
/product="putative rRNA methylase"  
/protein\_id="Prokka:DMACINML\_00687"  
/translation="MIVYGKQIFFYILERHKELINELYLAKECDKETFKKIANSFGKI  
KKLDFKTAQAYAKGGNHQGFLLDIKEYEFKDLHTLKKGFIAILYGISDVGNGAIVR  
TAYALGVDGLIFIGERLAMEGVIRTSSGAALDLEIALNNDIFTVLNELKQVGFKLFAS  
ASGGKQIHHYKVDKGGKALILGSEGLGLSAKIIKKCECVGIEMKNNFDSLNVSAFA  
ILCDRMINA"

gene complement(145589..146413)  
/locus\_tag="DMACINML\_00688"

CDS complement(145589..146413)  
/locus\_tag="DMACINML\_00688"  
/inference="ab initio prediction:Prodigal:2.6"  
/inference="similar to AA sequence:RefSeq:ALF91223.1"  
/codon\_start=1  
/transl\_table=11  
/product="tetrapyrrole methylase family protein"  
/protein\_id="Prokka:DMACINML\_00688"  
/translation="MLYFIPTPIGNLSDISFRALELLKTCNVFFCEDTRVSKSLLSLL  
SSKFEIDFGDKQFISFHTHNEKKVLENLDLEFFDQDIAFLSDAGMPGISDPGQFLIDF  
ALKNDIQFEVLPGANAALVALVSSALCEKEFIFMGFLANKGKERQRDIQKILNHTYPS  
IIYESPKRILSLIEQIAILDSQREIFAIKEISKKFETKFKAKAIDLFDILKQTNLKG  
WVVVLAKNDKDSIGNSLCENDILELEIPLKTKSKLLAKMNGKNPKEIYQKLLLSQS"

gene complement(146416..146616)  
/gene="rpmE"

CDS complement(146416..146616)  
/gene="rpmE"  
/locus\_tag="DMACINML\_00689"  
/inference="ab initio prediction:Prodigal:2.6"  
/inference="similar to AA sequence:RefSeq:CAL34326.1"  
/codon\_start=1  
/transl\_table=11  
/product="50S ribosomal protein L31"  
/protein\_id="Prokka:DMACINML\_00689"  
/translation="MKKEIHPEYVECKVSCACGNTFVTKSNKSELRVVICSSCHPFFT  
GSEKIVDAAGRVEKFKKKYAMQ"

gene complement(146695..147348)  
/locus\_tag="DMACINML\_00690"

CDS complement(146695..147348)  
/locus\_tag="DMACINML\_00690"  
/inference="ab initio prediction:Prodigal:2.6"  
/inference="similar to AA sequence:RefSeq:CAL34327.1"

```

/note="conserved hypothetical protein Cj0156c"
/codon_start=1
/transl_table=11
/product="hypothetical protein"
/protein_id="Prokka:DMACINML_00690"
/translation="MQFLYHKQAGEEILKLGEEFAHLKARRIKENEILSLRNLEDDF
IYDYKISNLDRNSCLLYFLNKHFKPHSQSELNLALAVIDTKILEKTLPLFLNELGVANL
HLVFTEFSQRNFKLDFERLEKIISSCEQCGRSRKMQIQSYKNIQEFKSFDAVLVD
FEGEIKEFDKTRLYFIGPEGGFSPKEKQMFKEKICLKVPNILRSQSAVVAVAAKILL"
gene complement(147349..147756)
/locus_tag="DMACINML_00691"
CDS complement(147349..147756)
/locus_tag="DMACINML_00691"
/inference="ab initio prediction:Prodigal:2.6"
/inference="similar to AA sequence:RefSeq:CAL34328.1"
/codon_start=1
/transl_table=11
/product="putative integral membrane protein"
/protein_id="Prokka:DMACINML_00691"
/translation="MDKSYEFFLALHLYSLYASGFLMLFYLVLTQGNFKTEFIFIRRI
RLFLPIIYVFLALMLFTGFLLLAIKQFQMHLNLWLMIFSWIFIFALAIHFHTQFKKAR
RLRRYITFRRISFMILFCELVLLILPFLTGKYL"
gene complement(147760..148179)
/locus_tag="DMACINML_00692"
CDS complement(147760..148179)
/locus_tag="DMACINML_00692"
/inference="ab initio prediction:Prodigal:2.6"
/inference="similar to AA sequence:RefSeq:CAL34329.1"
/codon_start=1
/transl_table=11
/product="putative heme-binding lipoprotein"
/protein_id="Prokka:DMACINML_00692"
/translation="MGKNLSILISLFLVILFLNACSNDKEFNHKNQDTTEEIVQIEQND
EKTEFSDTNLPLPVDDEANIGEEYDINPSVINSLYKQKATCHGEKGEIKTKKGLIAIK
NLSSEKFIQRLQNLKDEAHNFLTQEQRNLAKYIGKE"
sig_peptide complement(148120..148179)
/locus_tag="DMACINML_00692"
/inference="ab initio prediction:SignalP:4.1"
/note="predicted cleavage at residue 20"
gene complement(148179..148760)
/locus_tag="DMACINML_00693"
CDS complement(148179..148760)
/locus_tag="DMACINML_00693"
/EC_number="4.2.3.12"
/inference="ab initio prediction:Prodigal:2.6"
/inference="similar to AA sequence:RefSeq:CAL34330.1"
/codon_start=1
/transl_table=11
/product="putative 6-pyruvoyl tetrahydropterin synthase"
/protein_id="Prokka:DMACINML_00693"
/translation="MIIRKLFEFENAHIVRFCSSSRCKSSIHGHSYKVEVLLESKYLD
NAGMVYDFGLLKTHMRQIIDSFDHAITL FNQDDESYLNEMKKYSQRWVSLPVNVSAEN
FCRVFFILIDALLKQTKMINGEQGVNLQSIIVHETRTGYAQQGFKEDAYSPTMPKIALE
NIEFSPAIAEWSDIEFYDKLKNLHIFTNPKEV"

```

gene complement(148757..149500)  
/locus\_tag="DMACINML\_00694"

CDS complement(148757..149500)  
/locus\_tag="DMACINML\_00694"  
/inference="ab initio prediction:Prodigal:2.6"  
/inference="similar to AA sequence:RefSeq:CAL34331.1"  
/codon\_start=1  
/transl\_table=11  
/product="putative radical SAM domain protein"  
/protein\_id="Prokka:DMACINML\_00694"  
/translation="MQLVESFLSIQEGEGKYSGLAIFMRFAGCNFNCLGFGVKLIKNG  
KTLKGC DTIRAVFTKEFN EYENLNANELFKRVLDLKKDFDPIVVITGG EPLIHHENP  
EFIHF IQTLLENNFKVHFESNGSIELDFEKYPFYKECIFALS VKLQNSGISKEKRLNF  
NALKGF KHYAKDSFYKFVLNSSQLESSALEILEILEKAPNEIFCMPMGENEQNLKQNA  
LKIAEFCIKNGYNSDRIHIRLWNDKEGV"

gene complement(149503..150465)  
/gene="moaA"

CDS complement(149503..150465)  
/gene="moaA"  
/locus\_tag="DMACINML\_00695"  
/inference="ab initio prediction:Prodigal:2.6"  
/inference="similar to AA sequence:RefSeq:CAL34332.1"  
/codon\_start=1  
/transl\_table=11  
/product="putative molybdenum cofactor biosynthesis  
protein A"  
/protein\_id="Prokka:DMACINML\_00695"  
/translation="MLIDQFGRKINYLRISVTQRCNFRCLYCM PKIPFNHQPKENLLS  
FEELFLFVKVAIDEGIEKIRITGG EPLLRKDL SIFIKMINDYK KDLDLAITTNGFLK  
DFAKDLKDAGL KRLNISLDTLESKKAKT LAQKDVLD SVLAGIDEALNVGLKVKLNTVV  
LKGLNDELISLLEFAKSKNIQIRFIEFMENIHAYGKLQGLKRDEIIQILSQYQIKL  
IKKA EKAPVSIYSADDYEFGIIDPHSHEFC DSCNRIRLSAEGLLIPCLYFDEALS IKE  
AVRKG DINA AAKILQEVL RNKPEKNRWSVVDNETSSRAF YQTGG"

gene complement(150481..150999)  
/locus\_tag="DMACINML\_00696"

CDS complement(150481..150999)  
/locus\_tag="DMACINML\_00696"  
/inference="ab initio prediction:Prodigal:2.6"  
/inference="similar to AA sequence:RefSeq:CAL34333.1"  
/codon\_start=1  
/transl\_table=11  
/product="putative periplasmic protein"  
/protein\_id="Prokka:DMACINML\_00696"  
/translation="MSNDVLYLVFMIVLLVAILAYMNIKDKESSAKINKLQGVVEDIT  
KELHYLRKELGVKDEGDQEEEDYKITLLKEEIQITL EKQISAKITPVLRTLKTMEHII  
EDFQNEQQNRILNLEQKAQSMTKLPNYDTEEQKIVDLFKEGKSIEQIAKDLRMGTGN  
VELVLKFKQLIK"

gene complement(150992..151492)  
/locus\_tag="DMACINML\_00697"

CDS complement(150992..151492)  
/locus\_tag="DMACINML\_00697"  
/inference="ab initio prediction:Prodigal:2.6"  
/inference="similar to AA sequence:RefSeq:CAL34334.1"

```

/note="hypothetical protein Cj0163c"
/codon_start=1
/transl_table=11
/product="hypothetical protein"
/protein_id="Prokka:DMACINML_00697"
/translation="MGISLFKAGFEASLECCDIENNHFLQEYLKLGAISSLKWKKLA
LRVDFDEGEKIIFDLLLLSLKEDILRLEDSLKNDLLTLKQKGVVESLNFEYLNFLDE
ILEEGKEYYIRFDLNNQKMAIFARAQNKLAQIIKIKPEDRIAFDAFVVQLQRDMIRN
KKDKNE"
gene complement(151483..152367)
/gene="ubiA"
CDS /locus_tag="DMACINML_00698"
complement(151483..152367)
/gene="ubiA"
/locus_tag="DMACINML_00698"
/EC_number="2.5.1.-"
/inference="ab initio prediction:Prodigal:2.6"
/inference="similar to AA sequence:RefSeq:CAL34335.1"
/codon_start=1
/transl_table=11
/product="putative 4-hydroxybenzoate
octaprenyltransferase"
/protein_id="Prokka:DMACINML_00698"
/translation="MNIIWNKFKDILELVVFKHSIFALPFLFSSMIVASKLVNDSAWF
GFKALILGIICAVSARNFAMATNRLMEDIDKDNPRCANRPNVSGKIGRKSVMIFIIL
NAIIFIVCSYFINTLAFYLSFPVLFVLAIIYSAFKRFSSLAHLVLGFLGLAPIAGSVI
VMGEIHIYSVILCLGVTFWTAGFDLLYSLQDMEYDKKVLHSIPAKFGSKATLFIISAF
CHVLAVLFWLLFVWQVWGVALGNIALLGVIISGIIAFAHEKIVHKNFAHIDKAFFTLN
GYLSIIFFIFIWVLDLLWG"
gene 152438..153307
/gene="miaA"
CDS /locus_tag="DMACINML_00699"
152438..153307
/gene="miaA"
/locus_tag="DMACINML_00699"
/EC_number="2.5.1.75"
/inference="ab initio prediction:Prodigal:2.6"
/inference="similar to AA sequence:RefSeq:CAL34336.1"
/codon_start=1
/transl_table=11
/product="tRNA delta(2)-isopentenylpyrophosphate
transferase"
/protein_id="Prokka:DMACINML_00699"
/translation="MFFQIALIGTTASGKTYIANALAKEFNAVVLSLDSLVCVYKEINI
ANAKPSKDELMNLNYFGVNLLSVDEHFNVELFIREYQKAKEFALMNDLPLIIVGGTGF
YLKTMIDGLSQKIQDTSILSNDEIYTLNLLKIDPAYKIEKNDTYRLRKWLSIYENTKE
IPSDFLKRTQKDGVLKDIEIYELVWDREILRKRIEARTKEMIDSGLIEEARMFLSNFD
NNLKALNSIGLKECKEYLENKISLKELENLITIHTSQLAKRQRTFNKKFQSTPLEFSK
ALTLLRNKFLAKK"
gene complement(153293..153856)
/locus_tag="DMACINML_00700"
CDS complement(153293..153856)
/locus_tag="DMACINML_00700"
/inference="ab initio prediction:Prodigal:2.6"

```



```

/inference="similar to AA sequence:RefSeq:AHW91179.1"
/codon_start=1
/transl_table=11
/product="integral membrane protein"
/protein_id="Prokka:DMACINML_00700"
/translation="MDLYSLILLSCALAMDAFAVSLCKGFSVKKLNLRHYVITGAYFG
GFQALMPAIGYVIGITFASFIASIDHWIAFILLSLIGLKMIKESFENENCDTNSNQFG
FKIMFALAVATSVDALAIGVSFAFLDVNLFALFLIGSITFILCAIALEIGNKFGTRF
KNKAEFLGGAVLIILGIKILIEHLFFS"
gene 154029..154103
/locus_tag="DMACINML_00701"
tRNA 154029..154103
/locus_tag="DMACINML_00701"
/product="tRNA-Glu"
/inference="COORDINATES: profile:Aragorn:1.2"
/note="tRNA-Glu(ttc)"
gene 154265..154672
/locus_tag="DMACINML_00702"
CDS 154265..154672
/locus_tag="DMACINML_00702"
/inference="ab initio prediction:Prodigal:2.6"
/inference="similar to AA sequence:RefSeq:AHY39679.1"
/codon_start=1
/transl_table=11
/product="integral membrane protein"
/protein_id="Prokka:DMACINML_00702"
/translation="MSYDTNFFLLYFKDKVPKDSLIFLKESLEKASEEQKEKLLFTKL
KNPLYGLLFAFLPGLDRIYNGNIILGILKIISVILVSMGLVIAEDKNDSTMLIFIN
LFFILSVWILDYFLVWKDQCNNLKKIFEVLQ"
gene 154669..155097
/locus_tag="DMACINML_00703"
CDS 154669..155097
/locus_tag="DMACINML_00703"
/inference="ab initio prediction:Prodigal:2.6"
/inference="similar to AA sequence:RefSeq:AHY39679.1"
/codon_start=1
/transl_table=11
/product="integral membrane protein"
/protein_id="Prokka:DMACINML_00703"
/translation="MKQDKTILLIFKDKIPQERLFILGEELKKSQKDL SALY AISLKN
PLVGLVLSITVGLFGVDRFYKGDILLACIKLAFFIIPLFATFAAFIALLNKSHSIFID
YFAIFALMFVVASIWKLVDIYLVFVGIKKDNFYKILNFLS"
gene 155205..155843
/gene="sodB"
/locus_tag="DMACINML_00704"
CDS 155205..155843
/gene="sodB"
/locus_tag="DMACINML_00704"
/EC_number="1.15.1.1"
/inference="ab initio prediction:Prodigal:2.6"
/inference="similar to AA sequence:RefSeq:CAL34339.1"
/codon_start=1
/transl_table=11
/product="superoxide dismutase (Fe)"

```

```

/protein_id="Prokka:DMACINML_00704"
/translation="MFELRKLPHYDTNAFGDFLSAETFSYHHGKHHNTYVTNLNLIKD
TEFATKDLVSIKSSSGGVFNNAQVYNHDFYFDCITPNACEVKGDIKAALKEFGSL
ENFKAEFIKGATGVFSGWFWLVYNTKNQKLEFVGTSNAATPITEDKVP LLVVDVWEH
AYYVDHRNARPAYLEKFYAHINWEFVAKAYEWALKEGMSVSYFANELHPVK"
gene complement(155871..157076)
/locus_tag="DMACINML_00705"
CDS complement(155871..157076)
/locus_tag="DMACINML_00705"
/EC_number="1.5.1.7"
/inference="ab initio prediction:Prodigal:2.6"
/inference="similar to AA sequence:RefSeq:CAL34341.1"
/codon_start=1
/transl_table=11
/product="putative saccharopine dehydrogenase"
/protein_id="Prokka:DMACINML_00705"
/translation="MKNLLIIGAGVSRVATVKCAMNSDTFSKITLASRTKSKCDEIA
SFIKERLGVEIQTAQIDADDSDAVVELIKKTGAQILLNVALPYQDLSLMDACIKAGID
YVDTANYEHPDLAKFEYKEQWARNDKFKEAGILGLLGSFGDPGVTNVFCAYAQQNLFD
EISYIDILDCNAGDHGYAFATNFNPEINLREVSAGRYWEKGEWIETEPMEIKMEWDY
PEVGVKDSYLLYHEELESLVKNIKGLKRIRFFMTFGQSYLTHMKCLENVGMLGIKPV
HOGKEIPIEFKTL LPDPASLGPRTKGYTNIGCVIRGVKDGKDRQVYIYNVCNHEEC
YKETGAQAVSYTTGVPAMIGTKLIAKGIWQGGKGVFNMEEFDAKPFMDELNSQGLPWKI
IEMTPSLGE"
gene complement(157112..158017)
/gene="cfbpC"
CDS complement(157112..158017)
/gene="cfbpC"
/locus_tag="DMACINML_00706"
/inference="ab initio prediction:Prodigal:2.6"
/inference="similar to AA sequence:RefSeq:CAL34342.1"
/codon_start=1
/transl_table=11
/product="putative iron-uptake ABC transport system
ATP-binding protein"
/protein_id="Prokka:DMACINML_00706"
/translation="MLEIKNLSKNFGKIQALKNINLHVKEGEFLSILGGSGSGKSTLL
RIIAQLEQASSYEF LKCKGEVAMMFQNYALFPHLNVEKNILFALYDKKDKKQILEDLL
KTFEIEENLRYKKIDEISGGQAQRVAFARAVARGCKLLLLLDEPFSNLDQNLKQDLRREL
KKLIQKQKITAIMVTHDIEDAYCMSDKIAFLDKGEILAHADPKELYFKPNHKSARILP
DLNIIIEELDLEDEFFQWIASKNYTFGYAELKIGNRFEATILQKEFLGAFYRLKVRYK
NIEFFMLSSNYPLKEKINFDIINF"
gene complement(158004..159620)
/gene="cfbpB"
CDS complement(158004..159620)
/gene="cfbpB"
/locus_tag="DMACINML_00707"
/inference="ab initio prediction:Prodigal:2.6"
/inference="similar to AA sequence:RefSeq:CAL34343.1"
/codon_start=1
/transl_table=11
/product="putative iron-uptake ABC transport system

```

```

permease protein"
/protein_id="Prokka:DMACINML_00707"
/translation="MLKTLKYYKIGAILLALFLTLPIFGIFAELFYILFQNFNSTDLA
EISSIKENLSHFFDYLFKFKIKDTLIVSIGVLLSLILGVSSAYLMANYNFYFCRILE
KLLILPLAIPAYILAFVYVGMDFQGFHEIFGFRIDFFNHYGIVFLGISLYPIYL
FAKTAFKSEAIEAYEVAKIMGYSEFRIFSRVMLLSARPAIFSGALLVLMETLSDYGAS
AYLGVDTFSAGIFKLWYDLNDSYSSSILSGILMIFVFLIMYIDYYYKKNKHYSFNQNL
TLFIKKRKLSHIKQILACFYCFIALLGFILPFIWLVYWGKDFKLFETEFYIISFQT
IILAFITALITLLAYFLMFSSRIIKNFFSLCILKSSLGYSIPAAALGISMIVLFV
FLDKIFHLNLLGTSLIILVFAYIIRFLASAIYSLEGGYNKIHLNTDEASLNLRPSYLI
LFFKIHTPLMKHFLFLAFIIVFIDTIKELPLSRILAPFGFETLSVKAFWFASDERIYD
AALPSLLIVLLSLIVVIWMDKITRKDDVRN"
gene      complement(159620..160624)
          /gene="futA1"
          /locus_tag="DMACINML_00708"
CDS       complement(159620..160624)
          /gene="futA1"
          /locus_tag="DMACINML_00708"
          /inference="ab initio prediction:Prodigal:2.6"
          /inference="similar to AA sequence:RefSeq:SQE23619.1"
          /codon_start=1
          /transl_table=11
          /product="iron ABC transporter periplasmic iron-binding
protein"
          /protein_id="Prokka:DMACINML_00708"
          /translation="MKKIFSLCLLGFSLLGAAELNIYSARHYDADFQIIKKFEEKTGI
KVNHTQAKASELIKRLSLEGSNSPADIFITADISNLTEAKNSGLLSPVSKYLEDTIP
AHLRDKDGEWFAITKRARIAYNKNANTDISKMKNYEDLAKPEFKGQIVMRSATAPYS
KTLASIIANDGDENAKAWAKGVLNLDLTKPKGGDRDQARQVFAGEAKFAVMNTYYIG
LLKNSKNPKDVEVGNLGIIFPNQDNRGTHINISGIAMTKSSKNQEAAKKFMEFMLTP
EIQKILTDSNYEFPINRNDVELSQTVKDFGTFKEDQIPVSQIAEKVKEAVKIYDQVGF
"
sig_peptide complement(160571..160624)
           /gene="futA1"
           /locus_tag="DMACINML_00708"
           /inference="ab initio prediction:SignalP:4.1"
           /note="predicted cleavage at residue 18"
gene      complement(160625..160747)
          /locus_tag="DMACINML_00709"
CDS       complement(160625..160747)
          /locus_tag="DMACINML_00709"
          /inference="ab initio prediction:Prodigal:2.6"
          /inference="similar to AA sequence:RefSeq:CAL34345.1"
          /codon_start=1
          /transl_table=11
          /product="putative lipoprotein"
          /protein_id="Prokka:DMACINML_00709"
          /translation="MKKLVLFLFCLGFAFACSEHSNADFKDHDKTKYNSQYKDK"
sig_peptide complement(160676..160747)
           /locus_tag="DMACINML_00709"
           /inference="ab initio prediction:SignalP:4.1"
           /note="predicted cleavage at residue 24"
gene      160989..161840
          /locus_tag="DMACINML_00710"

```

CDS 160989..161840  
 /locus\_tag="DMACINML\_00710"  
 /inference="ab initio prediction:Prodigal:2.6"  
 /inference="similar to AA sequence:RefSeq:CAL34346.1"  
 /codon\_start=1  
 /transl\_table=11  
 /product="putative iron transport protein"  
 /protein\_id="Prokka:DMACINML\_00710"  
 /translation="MKFYTMLSTLFISFMLSACAVLQKPSPLQENKDFYILNTHTQEK  
 ISFEDMILELLKADVILLGEKHDEAKHKISQVMIFNALEGNLSSQNISFDVALEMLAS  
 TEQNHLDKAFKKNKNIKVNELANALNWDKGWKKDYDQFVNAVYFSRAKILGANLSRS  
 EITSIYNGVQPLKGYVSTTNEVKKQIFDIISLSHKLNPQENKELLDKLVETIQQFKDRR  
 MADVLVHHTNKVLLLAGNYHTSKKIGVPLHIQDFKSDKKIVVVNLNYGKVDLKDSDYI  
 FIYKGGE"

sig\_peptide 160989..161051  
 /locus\_tag="DMACINML\_00710"  
 /inference="ab initio prediction:SignalP:4.1"  
 /note="predicted cleavage at residue 21"

gene 161837..164113  
 /locus\_tag="DMACINML\_00711"

CDS 161837..164113  
 /locus\_tag="DMACINML\_00711"  
 /inference="ab initio prediction:Prodigal:2.6"  
 /inference="similar to AA sequence:RefSeq:AON66399.1"  
 /codon\_start=1  
 /transl\_table=11  
 /product="Putative outer membrane siderophore receptor"  
 /protein\_id="Prokka:DMACINML\_00711"  
 /translation="MKKLSLICVMGLCFANFAFSEEFDSLEISGSRIKNDEKPFVT  
 PGATSTRDNLNSSTQSIDSIVRSVPGAYTQVDQAQGGVSVNIRGMTGLGRVNTQIDGV  
 TQTFFGSASDDSFHGQIGTSSFTAPIDKNFLVALDVNRGTFSGANGANALMGSAFRT  
 IGVDDIVQEGRVFGLLGKYSYGSNAIGPDFMGAIAGKTMLNNTSLGVLFAYSQGNVS  
 QNYKIGGGGYIGDQKPPIDTDDDGI PDDNLAAPINPNLNQPRSQLFKVEYKSDISE  
 AILNYRAYKNNLAGRKITNDTYQIDYRLNPDSNLLDLKFLFAYNDGKQKYNQGSTWGY  
 HDMSGVKTKNRAVTFDLNNTMNEKFSQDSNLYFTYGVNILLNHYSNDFPQDRVLLPYI  
 LTSFYKPKGQDIKTLYLDTSFTQGIFTLNSNVNWTNAQLSGYKGCISMANPYCQPKNA  
 TNLEKDYNFNYSMLMSADIHPLFNPFISYSKSHRIPNVQEYFFTHDASFEHNMNTFL  
 KAESADTYQIGFNSFTHEILNDSDTLGFKMLYYDTKVKNYIYNRRYWKADDAVFLMQ  
 LNDDEKAKFHGVELEFKYDTGFFYSILSYTYQKSKHKFSDTESLEFGGAQSGQSQFAQ  
 LPEHYANLDMGVRLFEEKLTLGALAKYTGKAKRIVPVGSLDDDDPSNPDAMAPLKTDE  
 LPKIPTIVDLYANYKILKNFTIKAEVQNLFDKNYMDALYSYNTGENQNAGGLFDPIYI  
 YNNSARGRTFIVSFYKY"

sig\_peptide 161837..161899  
 /locus\_tag="DMACINML\_00711"  
 /inference="ab initio prediction:SignalP:4.1"  
 /note="predicted cleavage at residue 21"

gene 164126..164887  
 /gene="exbB1"

CDS 164126..164887  
 /gene="exbB1"  
 /locus\_tag="DMACINML\_00712"  
 /inference="ab initio prediction:Prodigal:2.6"  
 /inference="similar to AA sequence:RefSeq:CAL34348.1"

```

/codon_start=1
/transl_table=11
/product="biopolymer transport protein"
/protein_id="Prokka:DMACINML_00712"
/translation="MLKKIFLFCFLLLNLNAEVNVTDTNLSFDSPKIEAEVPKIELSL
SSLYQNADEVVKGVIYILVLFVSLAWAVFISKLMQFYFMKKNLDFSIHKIKELKNLNE
LDQTKGFAGVLSLEIQDELEKSEYKNDHIKERIELRLQNTISKQITASKNGLSLLASI
GASAPFIGLFGTVWVGIMNAFIGIANLGNASLAVVAPGIAEALFATAFGLVAAIPAVLF
YNYLTRKNLKLMMHHLDELANFVYILFHRSYFNDKN"
sig_peptide 164126..164185
/gene="exbB1"
/locus_tag="DMACINML_00712"
/inference="ab initio prediction:SignalP:4.1"
/note="predicted cleavage at residue 20"
gene 164874..165284
/gene="exbD1"
/locus_tag="DMACINML_00713"
CDS 164874..165284
/gene="exbD1"
/locus_tag="DMACINML_00713"
/inference="ab initio prediction:Prodigal:2.6"
/inference="similar to AA sequence:RefSeq:CAL34349.1"
/codon_start=1
/transl_table=11
/product="biopolymer transport protein"
/protein_id="Prokka:DMACINML_00713"
/translation="MIKTEIAHKEEELSEINITPFIDIMLVLLIVFMAVTPPLITSSIK
IELPKSSQQAEDKLNPIILYLNLDNTLAINDDKLSLENLSSALDIKTKGNKEEIIYF
HIDKSVKYEDIMQVMQKLKENGYGKIALSSKKVD"
gene 165286..166077
/gene="tonB1"
/locus_tag="DMACINML_00714"
CDS 165286..166077
/gene="tonB1"
/locus_tag="DMACINML_00714"
/inference="ab initio prediction:Prodigal:2.6"
/inference="similar to AA sequence:RefSeq:CAL34350.1"
/codon_start=1
/transl_table=11
/product="TonB transport protein"
/protein_id="Prokka:DMACINML_00714"
/translation="MKSSVIFGFVSSLVLHALVLMFFLFSFYTQEKSSGVDFKQGVF
TSIMMVSELPIGELKEVSIDQKKSNSQDKNKKQDEKMSLNSQDKNKKQDEKMSLNSQD
KNAVLKAQKKIEKQDENQAQKEIANASENSKFKNETLSAPLQSNEDKTQTIVSGNAKE
QIKSYQALLMAHLAKFKYPQEAIMQKQEGVVRIRVSIDESGNVLSKELKKSCPYAVL
NDEVLSLFRASPLPKPPKEMLDGEEKISFVMPIDYNIKDYLGKK"
gene 166133..167353
/locus_tag="DMACINML_00715"
CDS 166133..167353
/locus_tag="DMACINML_00715"
/inference="ab initio prediction:Prodigal:2.6"
/inference="similar to AA sequence:RefSeq:CAL34351.1"
/codon_start=1
/transl_table=11

```

```

/product="putative transmembrane transport protein"
/protein_id="Prokka:DMACINML_00715"
/translation="MFSSFFASKKWALWAYLGLFLLLFFLYMQTSLNVAINSWYSDFY
NVLQPKIELLDSNSTQKAQENFENNASLIQEANQKAQENFQKANFINKGALYYYYQSL
LEYFFNSRAMIEKESYSASDFYALILVFLAIAIPYVLIATINIYFASVYAFKWREAMT
FSYLKFWKNKDDNIEGSSQRIQEDTYNFSKIVESLGLSFIRALMTLVAFIPILWTLSD
VVKALFANLSENSSFYFLKNIDGLLVYVALLISLGLLIVSWFVGIKLPGLEYNQKA
EAAFRKELVYAEDNRKEYAKNETMIELFTGLKFNYKRLFLHYGYFNIWLILFEQMIVI
VPFLIMAPGLFAGAIGLIVMQINNAFDQVRSSFSVFITNWTITQLRSIYKRLKEFE
KNIEYAKNKNKNHL"
gene complement(167344..168477)
/gene="ynfM"
/locus_tag="DMACINML_00716"
CDS complement(167344..168477)
/gene="ynfM"
/locus_tag="DMACINML_00716"
/inference="ab initio prediction:Prodigal:2.6"
/inference="similar to AA sequence:UniProtKB:P43531"
/codon_start=1
/transl_table=11
/product="Inner membrane transport protein YnfM"
/protein_id="Prokka:DMACINML_00716"
/translation="MKMLKILIIFCATLTLISIVYAPQPIAPLLSNYFHVNLHQISWII
SVTLIPLAIAPLVGYLLEIFSLKKILVSLFLCSIFGIIGNLNDNFYFFLFLRFLQA
LCIPAILTALLTLLSRLESDNIQKNIAIYVGATTFGGFVGRVFGSFLSDFSWHFALN
FFSILMMVCAFLFLFFKEHPISLNTQTSLRDFLPIKELRFMVILFCVFTIFFSFQSI
VSFLPFHLKESIKDITQTQIGLVYLGFLTGVISSLLIGKTIEILGSKIRTAIFGLVF
ITGCFMIVGNFYFAFFAMFVFCSGMFISHCIFSGILNSIADKKGLANGIYLTFFYSG
GALGSVLPsfyYESFGWEFLCIFTAFLLIIFGKFRHFYK"
gene 168589..169950
/locus_tag="DMACINML_00717"
CDS 168589..169950
/locus_tag="DMACINML_00717"
/inference="ab initio prediction:Prodigal:2.6"
/inference="similar to AA sequence:RefSeq:CAL34352.1"
/codon_start=1
/transl_table=11
/product="putative integral membrane protein with
hemolysin domain protein"
/protein_id="Prokka:DMACINML_00717"
/translation="MDPSQVLDLNQTLPTASFDAGYSILMVVIALALVLLNGFFVLSE
FSIVKVRRSKLEEMVKEKKVGAKKALEVTSRLDYLTSACQLGITLSSALGWIGEPAI
AKMLEIPLANLGFNGVIIHTIAFIIAFSIIITLLHVVLGELVPKSIATAIADKAVLWVA
RPLHFWILFLPCIKIFDFLAAMTLKLFGIKPAKESELTHSEEEIKIIASESQKGGVL
DEFETEIIIRNAVDFSDTVAKEVMTPRKDMICLNKQKTYAENMQIICDHKHTRFPYIDG
SKDTILGMIHIRDIVQNELSDKSENLDTFVKPLILVPENISISKVLVMMNKERSHTAL
VIDEYGGTAGILTMEDIMEEIIIGEIKSENEEDSYKLAENIYEFQGRCDIETVEEMLL
ISYDEDLEQVTIGGYVFNLLGRLPVVGDRIEDELCCYEVKMDGNSIERVKVVKTKN
DEE"
gene complement(169963..171147)
/locus_tag="DMACINML_00718"
CDS complement(169963..171147)
/locus_tag="DMACINML_00718"
/inference="ab initio prediction:Prodigal:2.6"

```

```

/inference="similar to AA sequence:RefSeq:AAW34772.1"
/codon_start=1
/transl_table=11
/product="Ser/Thr protein phosphatase family protein"
/protein_id="Prokka:DMACINML_00718"
/translation="MRILLILRGNYAGQEEFIKENRLKDYTLDLNSLRLLSGSVSKI
VSKYKNLNLKNDEELYKILLQFLEMROMQGEFCIINAYNETLKVYKELAKQYRYNVYV
IDFKSSLEECLEKNEQKAKERGYIVSQSLKKTHHLLERIPKKYTILNPNDWKKCLYQ
MPNLSKYRKIIHHIGDIQGCFSVLKEYLQELKDDECYIFLGDYIDRGIENGKVLKFLK
ICERENVYLLEGNHERHLIKWANGELSSSKEFNENTLKDFRKEKLTTPRDARKFYPLYK
ECLYYKFHEKQVFCSHGGVNFVPSKAYQISFMSSYDFIYGVGNVEESQKVASQFCEFT
KDNVYQIFGHRNRTKLPVQIEKRVFLCEGKVDDGGHLRIVTLDKKGFECIELKNKVYR
KK"
gene      complement(171156..171365)
          /locus_tag="DMACINML_00719"
CDS      complement(171156..171365)
          /locus_tag="DMACINML_00719"
          /inference="ab initio prediction:Prodigal:2.6"
          /inference="similar to AA sequence:RefSeq:CAL34354.1"
          /codon_start=1
          /transl_table=11
          /product="putative phnA domain protein"
          /protein_id="Prokka:DMACINML_00719"
          /translation="MPKDANGTELNAGDSVSVIKDLKVKGASTTLKRGTTIKNIKLT
KEGEIEAKVDKFGVIVLKTEFLKKI"
gene      complement(171415..172155)
          /locus_tag="DMACINML_00720"
CDS      complement(171415..172155)
          /locus_tag="DMACINML_00720"
          /inference="ab initio prediction:Prodigal:2.6"
          /inference="similar to AA sequence:RefSeq:ABS44192.1"
          /codon_start=1
          /transl_table=11
          /product="integral membrane protein, TerC family"
          /protein_id="Prokka:DMACINML_00720"
          /translation="MFEWFSAEMWIALATLIGLEIVLGIDNIIFFIAILVGRLPKEKR
QRARIFGLSLAMITRLLLLLSLFWIMKLTTPLFSVFSQEISGRDIIILGGLFLIAKS
TLEIHHIDIDNAGEKSDEEVLKEGAKRGFFSILIQIAVLDIVFSLDSVITAVGMVNIE
IMMIAVIVAVFVMMMLASKSISNFVDDNPTIKILALAFILVGVTLVAEGLDFHISKTY
VVFAMAFSLGVESINIYIKKKRLAQEKS"
gene      172263..173249
          /locus_tag="DMACINML_00721"
CDS      172263..173249
          /locus_tag="DMACINML_00721"
          /inference="ab initio prediction:Prodigal:2.6"
          /inference="similar to AA sequence:RefSeq:AOH52015.1"
          /codon_start=1
          /transl_table=11
          /product="ankyrin domain protein"
          /protein_id="Prokka:DMACINML_00721"
          /translation="MKKLEDIKAMNYKQKDELEDLVLEAIRDNLAKVKEILKDYPVK
ISCYELHFKNDEEYPLFDPYYLIMRAAYACEENNDFSI LDYLFDEYGLSLKDPKYN
FCFTDMKYIKEANDKYILIKKAKESNIICRNALIYYYILNADNPNSHI IKYLVNRGAK
FEVHDEGSFGWTPMHFWARRNNYELLELAIKGGANVMQTLDPSEYNETLLFEAVK

```

EAETYRVTQLLIELGANVNFATPRTPLDDAKGSRNKLLKDAGAMTSNEIRKKFNLPA  
 YDSSHCEIDGKTFDILLGKYRDECSKLLNDAIKKAKENGEIKNIDAKIINKL"  
 gene 173287..174039  
 /locus\_tag="DMACINML\_00722"  
 CDS 173287..174039  
 /locus\_tag="DMACINML\_00722"  
 /inference="ab initio prediction:Prodigal:2.6"  
 /codon\_start=1  
 /transl\_table=11  
 /product="hypothetical protein"  
 /protein\_id="Prokka:DMACINML\_00722"  
 /translation="MGNKDFGYFLNALENNDIKALEILLFDEELSNMQDENGNTLLHH  
 AARLGSAGGVAMLIDCNPFIRNNDGKTAFNIAVDNDDVYIAKMIDNVKDRWQRKHGRY  
 EEKLDSEMDIPFYLTDKESILKQFKEENITTESLLDTSYGDGMVVLQSVLNAWNLS  
 FINEKMPPVVEILIDQANGDVEALIDGFDEHMEQWENEVWDEPAVYAGKTEDGEDDYR  
 YETDPDEWIREIIPFDKWDELKKQMRLYAVKK"  
 gene 174254..174469  
 /locus\_tag="DMACINML\_00723"  
 CDS 174254..174469  
 /locus\_tag="DMACINML\_00723"  
 /inference="ab initio prediction:Prodigal:2.6"  
 /codon\_start=1  
 /transl\_table=11  
 /product="hypothetical protein"  
 /protein\_id="Prokka:DMACINML\_00723"  
 /translation="MYKFSKYLIHFRCRGEMLKYSQFIFYNLNKDLKQIHMNFTLNK  
 NNYKLITEKLAITWAKLNFLHPFKERQ"  
 gene 174679..175611  
 /locus\_tag="DMACINML\_00724"  
 CDS 174679..175611  
 /locus\_tag="DMACINML\_00724"  
 /inference="ab initio prediction:Prodigal:2.6"  
 /inference="similar to AA sequence:RefSeq:A0H52011.1"  
 /codon\_start=1  
 /transl\_table=11  
 /product="ankyrin domain protein"  
 /protein\_id="Prokka:DMACINML\_00724"  
 /translation="MKTLEDIKKLNFKIKMEIQQLFDFISNNDLENVKNLLKDYPVK  
 ESFYEAHFTYHHNNEDYELSLFDPAASLLKAAFTCGNYNDFSILDYLFDEYGLSLKD  
 SKYNFAFPDMKHIKEANDKYILMKKVEDDPCIYQKALIYAYILGAKNPNSQIIKYLVN  
 RGAKFEVHDEGYSGRTPMHFWARRNNYELLELAIKGGANVDMQTRLIQESEYNETLLF  
 EAVKEAETYRVTQLLIELGANVNFATPSTPLDIAKGSRNKLLKDAGAMTSEQIRKKF  
 NIYWDDKECKDKNYIEKHSKLLNDAIKKAKESE"  
 gene 175657..176130  
 /locus\_tag="DMACINML\_00725"  
 CDS 175657..176130  
 /locus\_tag="DMACINML\_00725"  
 /inference="ab initio prediction:Prodigal:2.6"  
 /inference="similar to AA sequence:RefSeq:CKG87488.1"  
 /codon\_start=1  
 /transl\_table=11  
 /product="hypothetical protein"  
 /protein\_id="Prokka:DMACINML\_00725"  
 /translation="MKNKNLLDKDTQEVFKYYLKNDSYLGKALDGLKKYERRAFISSI



```

LSYEYKNLVENGLKVDKEYKAILPPNLIATILEYDKSEFNGANLRNFINDLEFELEHI
EMELYDDPADFEGGDYINEDSECEDEDYTVEDWVEDQVSDIRDFLYALKDFKSKYR"
gene      complement(176182..176757)
          /gene="purN"
          /locus_tag="DMACINML_00726"
CDS      complement(176182..176757)
          /gene="purN"
          /locus_tag="DMACINML_00726"
          /EC_number="2.1.2.2"
          /inference="ab initio prediction:Prodigal:2.6"
          /inference="similar to AA sequence:RefSeq:CAL34356.1"
          /codon_start=1
          /transl_table=11
          /product="phosphoribosylglycinamide formyltransferase"
          /protein_id="Prokka:DMACINML_00726"
          /translation="MLVKLAVLFSGNGSNLQNIKLEKLHKKITIGKNTYEVVLCCLCNKKD
AYGIQRAKNFDLESVIEHKDYKNREEFDEILVKKIKESGADLTILAGFMRIKSPVFT
KNIKAINLHPSLLPLFKGAHAIKESYESDMKVAGVSVHVVNEELDGGKIIAQKAFKQ
NLTFEEFEAKIHALEHEILPLSVVEIFENCH"
gene      complement(176748..178118)
          /locus_tag="DMACINML_00727"
CDS      complement(176748..178118)
          /locus_tag="DMACINML_00727"
          /inference="ab initio prediction:Prodigal:2.6"
          /inference="similar to AA sequence:RefSeq:CAL34357.1"
          /codon_start=1
          /transl_table=11
          /product="putative kinase"
          /protein_id="Prokka:DMACINML_00727"
          /translation="MKTITDDIKTLEQNAINKGLDELILMENAGLNLAKLKKEAKKI
RKQYKIKKVKILFLLGGGNAADGLVALRNLKHAKAYKLGFKENEIFKKQEQLKNFG
FKFAKKEPKFKFHIVDCILGTGTNREADEKTKEILEKINQSKALKIACDIPTNLGF
TPCFKADITQCMGALKEILLEDFAKEFVGKIKLANLGVNAKFSLDSKAFLLKEDLK
TIERNSSNKGNGFHIYIIASASAGTLAGLGALNFGSGLVSLVAKKFSPLMLKEKI
ENNASAIALGMLENLDILKDEILQNIPLVDANCFLSEAVLWYLSRKDVVITPHPK
FIRLYKMCDFEDLSIEDLQRNRFYAKKFAQNYDCVLVLKGANPIIIQKEKIFVNLG
NEALAKGGSGDVLSGMIAALLGVKFSALEAAKNACLAHALVAKKYKFNKNSFDAIKLI
KGLKCL"
gene      complement(178102..178800)
          /locus_tag="DMACINML_00728"
CDS      complement(178102..178800)
          /locus_tag="DMACINML_00728"
          /inference="ab initio prediction:Prodigal:2.6"
          /inference="similar to AA sequence:RefSeq:CAL34358.1"
          /note="conserved hypothetical protein Cj0189c"
          /codon_start=1
          /transl_table=11
          /product="hypothetical protein"
          /protein_id="Prokka:DMACINML_00728"
          /translation="MENKSIAIFIDAENIPAKYAKSIFDIASDYGEIIIKRIYGDWTQ
KNIQAWKEQIAEYSLIAMQQFNFAANKNSSDMLITEIMSIFYEKDIDIFVIVSSDSD
YTSLIQKLRNKKQVIGMGLEKSIKSYVNAFSEFFYLDQDENKKEDILSKDYLRALIN
ITEQLIDEKGRAEYAIQIRTNMNRKYSDFNPNQNYGFKNFRALIQQKFLPKMKKFEEREK
NIYFLVKKDYENYY"

```

gene complement(178802..180307)  
 /locus\_tag="DMACINML\_00729"  
 CDS complement(178802..180307)  
 /locus\_tag="DMACINML\_00729"  
 /inference="ab initio prediction:Prodigal:2.6"  
 /inference="similar to AA sequence:RefSeq:CAL34359.1"  
 /note="conserved hypothetical protein Cj0190c"  
 /codon\_start=1  
 /transl\_table=11  
 /product="hypothetical protein"  
 /protein\_id="Prokka:DMACINML\_00729"  
 /translation="MKKLCVFSFDENLDIIDVESTFTRGLPNLSIVGLANIAIKESIE  
 RIKATLLTCNFSFPAKKITINLSPSGIPKKGSHFDLVIATLILLQNEFDFFVVGEL  
 GLDGSIKSTNELFSLLLFLSTKVKSAAKVVVVKNIALKASMIPLNIYGLEHLNEVIEF  
 FKEKNYEKFKFTQSHPLFANPLIENEIFIKNHFFELDFKDIKQEKAKRACLIAALG  
 MHNILFEGSPGSGKSMCAKRLVEIMPPQSLNEVLMQNAYMSLNSKDCEFTQKRALRHP  
 HHTSTRASIFGGGAKNAKIGEIALANGGVLFDEFPHFNKQIIESLREPLEDHKIHIS  
 RVNSKTTYETKFSVAAQNPCPCGNLFSKNLSCVCSENEIKRYKNHISAPIMDRIDL  
 VAMDEISKDDKSSNSKEMSERILKAFIFGKKGQKEFNGKLSDELQKFCILEKDAK  
 DTLDLAISRYNLSQRALNKILKVSRSIADFEKELLNKNHILEALSFRIRS"  
 gene complement(180304..180831)  
 /gene="def"  
 /locus\_tag="DMACINML\_00730"  
 CDS complement(180304..180831)  
 /gene="def"  
 /locus\_tag="DMACINML\_00730"  
 /EC\_number="3.5.1.88"  
 /inference="ab initio prediction:Prodigal:2.6"  
 /inference="similar to AA sequence:RefSeq:CAL34360.1"  
 /codon\_start=1  
 /transl\_table=11  
 /product="polypeptide deformylase"  
 /protein\_id="Prokka:DMACINML\_00730"  
 /translation="MVRKIITYPNSRFLNSEPVKQFDQELHTLLDDMYDTMIASQGV  
 GLAAIQVDIPLRALIVNILDENEEQKKEDLLEIINPQIIPLDEEKITCTEGCLSVPDF  
 FEEVERYNHILLKYQDRFGNFKELEAQGF LAVAIQHENDHLNGHLFIEKISFLKRQKF  
 DKEFKKKLKNQKSK"  
 gene complement(180859..181443)  
 /locus\_tag="DMACINML\_00731"  
 CDS complement(180859..181443)  
 /locus\_tag="DMACINML\_00731"  
 /inference="ab initio prediction:Prodigal:2.6"  
 /inference="similar to AA sequence:RefSeq:AIW09470.1"  
 /codon\_start=1  
 /transl\_table=11  
 /product="ATP-dependent Clp protease proteolytic subunit"  
 /protein\_id="Prokka:DMACINML\_00731"  
 /translation="MYIPYVIEKTSRGERSDIYSRLLKDRIIMLSGEIHDELAASIV  
 AQLLFLEAEDPQKDIYLYINSPGGVITSGFSIYDTMNYIKPDVCTICIGQAASMGAF  
 LSCGTEGKRFALPNSRIMIHQPLGGARGQATDIEIQAKEILRLKAILNDILAKNTKQK  
 VTKIVKDTERDFMSEAQEAKEYGLIDKVLEKSFK"  
 gene complement(181443..182768)  
 /gene="tig"  
 /locus\_tag="DMACINML\_00732"

CDS complement(181443..182768)  
 /gene="tig"  
 /locus\_tag="DMACINML\_00732"  
 /EC\_number="5.2.1.8"  
 /inference="ab initio prediction:Prodigal:2.6"  
 /inference="similar to AA sequence:RefSeq:ANS23308.1"  
 /codon\_start=1  
 /transl\_table=11  
 /product="trigger factor (peptidyl-prolyl cis /trans isomerase, chaperone)"  
 /protein\_id="Prokka:DMACINML\_00732"  
 /translation="MEVKAKQLDSVNATASVKIPSGMIKSEVENLAKKASKNVKMDGFRPGKVPVA AVLKRYQKELTQDAEQNLFKSAVDSALKELKKEVKELVGEPEYFEKFDQRDGEIVAELALSFKPEFKLDGYEELIPEYQTPKVTKKEIDEKKEELLKRFATPEAIKTKRALKEGDFAKFDFEGFVDEKAFDGGKAENYVLEIGSKQFIPGFEEGMVGMKS GEEKDIKVTFPKEYGAAHLAGKDAVFKVVLHEIQELKLPDELDEETLKKLLPNEEKPTVELLDEKLKEQIKNEKLFKLVNDELKAKFADALIEKYNFDLPRGIVEQETDMQFRNAFNTFSEKEIEELKTSKEKYQEKRDSFKEEAQSVKLTFFIIDELAKLRKIEVNDQELIQAIYFEAYRYGMNPKEHLENYKKQ GALPAVKMALIEEKLFSDIFMPKADKASKKEKEDK"

gene 182889..183461  
 /locus\_tag="DMACINML\_00733"

CDS 182889..183461  
 /locus\_tag="DMACINML\_00733"  
 /EC\_number="3.5.4.16"  
 /inference="ab initio prediction:Prodigal:2.6"  
 /inference="similar to AA sequence:RefSeq:CDH62018.1"  
 /codon\_start=1  
 /transl\_table=11  
 /product="GTP cyclohydrolase I type 1"  
 /protein\_id="Prokka:DMACINML\_00733"  
 /translation="MQEKFENCVKTMLEIIGENPTREGLVKTPNRVFKAYEFLTSGYKKNVKEILNNALFESSNEMVLVRDIEFYSLCEHLLPFFGRVHVAYIPDQKVVGLSKI PRLVEVYARRLQIQEQLTEQIAEALMENVGAKGVGVVIEARHMCVEMRGVQKANSTTTTSALRGLFLKNEKTREEFFSLINSPKQVRF"

gene 183461..184846  
 /gene="fliI"

CDS 183461..184846  
 /gene="fliI"  
 /locus\_tag="DMACINML\_00734"  
 /EC\_number="3.6.3.14"  
 /inference="ab initio prediction:Prodigal:2.6"  
 /inference="similar to AA sequence:RefSeq:CAL34364.1"  
 /codon\_start=1  
 /transl\_table=11  
 /product="flagellum-specific ATP synthase"  
 /protein\_id="Prokka:DMACINML\_00734"  
 /translation="MNLEKLRSKLGKENLSAVFGEITKISATSIEIRGLKTGVGDIILVSNENENLNTLAMVVEIKEQFSYLSPFSEIEGFKIGDRAFISDAGMQIGVSDPELLGRVVDPFMRPKDGKGAIEATKYMPIMRAPIDAMKRGLIEEVFPVGKTKIDALLTCGVGQKLGIFAGSGVGKSTLMGMIVKNSKAPIKVVALLIGERGREIPEFIQKNLGGKLDLDTVIIVATSDDSALMRKYGAFCA MSVAEYFKEQGDVLFIMDSVTRFAMAQREIGLALGEPPTTKGYPPSVLSLLPQLMERTGKEEGKGTITAFFTVLVDGDDMSDPIADQSR SILDGHIVLSRELDFGIYPPINI QNSASRVMGDIISPEHKLWARKFKRLNSLLKENEVLLRIGAYQ"

KGSDKELDEAIKKEFMQKFLGQNPEESFEFEETIRLLSQIDANVAPSAVQQNINMG  
SSATLPNPNLK"

ORIGIN

1 aaacaagggt ttacaaaatc ttcatttagc tttataaact ttagtttata atttaaagat  
61 tttaaagtcc ttttttgaaa aaggaaatga aagtataact aattaagctt aaaggaggat  
121 taaataaggc tagaaattta gccttatttt cgagatgggt gaaatttgag agtttaaaca  
181 aactaattta gagaagataa aaaccttccc taagctttaa aaattcctaa atttcagtat  
241 tttaaaaagt attccttgat ttttttagga tcgcttgttt ttgtaagagc taacataagc  
301 aaaactcttg ctttttgagg attttaaactc tcagcactaa taaaacccaa ttttttatct  
361 gtatcactca ccgcaacgcg tcctgctgca acccttgagc ttacaacaac atcaagcctt  
421 tgtttgatga gttcttttaa agcatttttt tgatcttcat gtatgcttcc tgcaccactc  
481 cctgctacaa caatgccttt agttccatta tcaataaag cttttgcagc aatggcacta  
541 ccatcatttg aataagtata gagtatatct acctttggca aacttgtgag cttacttaca  
601 tcaaaaggac tattttttgt gtgcgcttta cttatgttat tatagaaaaa aacttttcca  
661 tctactatat aacctacatc tccaaaatta ggagaagaaa aagcatcaac attttaaacta  
721 tgagttttta ccacgcccct agcactttaa attttatcgt tcatagcgac cataacgctt  
781 ttatttttgg cttctttatc agcagccaat gctacagcat tgtaaagatt ttttgggcca  
841 tctgcgctta tagcagttga tggacgcata gcgccaacta aaactacagg cttatcgctt  
901 ttaaccgtaa aatttagaaa ataagcggtt tcttccatgg tatcagtacc gtgagtaatg  
961 actacaccat ctactccctc atcaaaaagt ttattgattt ttttagcaag ctttaacca  
1021 atttcatcac gcatattaga gctatcgata tttgctattt gctctccgct aatattagcc  
1081 aactcttgaa tttgtggaac tgctttgatt aaaacatcta cggccacaac ccttgctgta  
1141 taaccggttg tggccacagc actatcgata gaacctgcta tagttccacc cgttgctaaa  
1201 atagcaattt ttggtttggc ttctgccata catactccta tagataaaaa taccatacag  
1261 cacaatagta actttttcac aaagccccct tatttattaa atttaagttt cgtaatgaaa  
1321 catatatata atattaataa ataataaata aaaattttat aaatatttac aaaatttctt  
1381 taataataaa ttgcgggggt gctaactctc taaattcatt cttagaaatg cttccaagta  
1441 aattaatatt ttcgcacaat tgcggttctt tgtcaaaatt aaaaaacaaa gcttctatag  
1501 ttttattatc ttttgtgagt ataagcttta gatgtttttc atcttttctt aagaattttt  
1561 tatttttaac ataaagattt tctaggataa aaaaaggagc cggattttta tgtccaaaag  
1621 gctcaaaaga ttctaaaatt tcaagcattt caaaatcgat ttcattagga tctaaaatac  
1681 ctaaaatttc atctgtatct aaaaattcac tttgagaaat ttccatacat tcttttttta  
1741 ttatggtttt aaatttttca aaagaatcaa gatctaagct aaggcctgca gcacccttgt  
1801 gtccaccata attgcttaat atagaatttg ctttagaaat caaagctaaa atatcgattt  
1861 tcccaacact tcttgcaact ctttttaagc gttgatcggt ttgtgaaaat acaaaagcag  
1921 gtttattaaa atgttttgct aaacgacttg ctactatccc taaaactccc tcatgccaat  
1981 ttaaaccgga tacaacaata caagaatcat tttcatcgat ttgactcaag ctatcttcaa  
2041 aaagctgttt ttcttcatct ttacgacttt cattaaaact gatgatttgc tctaagtaag  
2101 ctgaagcttt atccaagtcc tttgtatgca aaaattcata agaaatgctt gcatcatcca  
2161 ttcttccagc actattgata agaggagcga ttaaaaatcc tatattatca agtgcaaatt  
2221 tatctttttg ataatttgc ttaatcgcct taaaagcaac tcttttagat ttgttaatac  
2281 actctatccc tcgcctaact aatgccctat ttaaactctt taactccatc atatctgcaa  
2341 caatggcaat ggctagaagt tctaaaaatt tgcccatatc gtattttaat ttacaaacct  
2401 cttttaaagc agctattaaa taccaagcta cttgcgctcc acaaatttcg atatctggaa  
2461 aatcacaatc tttttgctta ggattaataa tcgcaaaagc atcaggcaaa atatcttggg  
2521 gcatatgatg atcagttata attaaatcaa tatttttttc cttacaaagc ttagctgctt  
2581 caaaggctgc tataaccatta tccactgtaa taatcaaatt tacatcaagc tcatgataa  
2641 tttcagcatt taaaccatat ccatctttga agcgattagg aattcttact gtataatcaa  
2701 aacctatc atcaaaaaat tctgccataa tgacacaaga gataatcca tcaacatcat  
2761 aatcgccac tatagcaatt ttttcatttt tatctatagc ttctttaatg cgatttgctg  
2821 ctttataagc atctttttaa caacaaggca aaggtaaact gcaaagcttg gtatgtaaat  
2881 ctttttcaa acgcgaagct agaatttttt taatttctact cttattaatt gtcttcatag  
2941 cttatagccg ctttgataaa accacaaatc acaggattaa cgcgctctaa tcttgaagtg  
3001 aattcagggt gaaattggac agctaaaaag aaaggatgat tgttttagctc gacagcctct

3061 ataagtcctt cgctctctcc acttactatt aatcctttgc tttcaaattc tttgcatat  
3121 tttggattag cctcgtagcg gtggcggtgg cgttctttaa tttttttgc attattataa  
3181 accttagcca aaagggagtt aggcttgact ttacactcat aagatcccaa acgcatagtt  
3241 ccgccc aaag gtgttttagc agtacgaatt tgttttttac cgctcgcata cataaattca  
3301 tcgatgagat aaacgatagg attagaacat ttatcatcaa attcacttga atttgcatct  
3361 tcgattttta acacatgtct agcaaattct accaatgcaa gctgcatacc caaacaatt  
3421 cccaaaaatg gaattttggt ttctcttgcg taatgaatag cttttatttt accctctact  
3481 ccgcgataac caaagcccc tgcaaccaa attccactca cttttttaa cgcttcagcg  
3541 ctttctaaat tttcaagctt ttcgctatct acccattgaa gttctactct agtatcaagc  
3601 gctgcacctg catgaatgat ggcttctgta agactcttat aactttcttt tagatccaca  
3661 tttttacca caaaagcgat tttgacttca ttgctcggag ctataactct ttttactaga  
3721 atatcccaat tttccatatt tggtttttaa ttttttaaat ccaaaataga agcgatagga  
3781 tttaaaatat cttgttttta gaaattcagt ggaatttgat aaatacttgc tgcataca  
3841 ctttctataa cgcaattttt ttcaacacca caagaaatag caattttatc ttttaaatct  
3901 ctatccagcg ctttttctact acgacaaata atcatatcag gactaatacc tatgctctt  
3961 agttcgccta cgctgtgttg ggtagggttg gtttttagct cccctgcagc cttgataaaa  
4021 ggcactaggg ttaaattggat attcatagca ttgtttttac ccacttccaa acgcaaagca  
4081 cgaatagctt ctaaaaaagg caaaccttcg atatctccga ctgttccacc tatctctacg  
4141 attaagatat cttgcccctc tcctgctttt ttaatacgtc ctttaatctc tcctacgata  
4201 tgtgggataa cttgaatagt tttaccaaga tattctccac gtctttcttt ttcgatcacg  
4261 ctttgataaa cacgccctgt ggtgaaatta ttatcttgtg ataaactctc atctaaaaaa  
4321 cgctcataat gccctaaatc aagatcagtt tccgctccat catctgtaac aaaaacttct  
4381 ccgtgttcaa atggactcat agtaccagga tcaacattga tataaggatc tgctttttaa  
4441 atgcttactt taagtcctga atttttcaat aaagtcgcga tacttgcagc tgctattccc  
4501 ttgccc aagg agcttaaaac tcctcctgta acaaaaatat atttagtttg tttactcatt  
4561 atcgataagc ctttaatttt tgtctaatta taacgcgata aaacttttta tttcattaga  
4621 attttaagta aaaaatgtaa gaattatgaa aaaatttatc aaggaaaatt tatgcaaact  
4681 actttacttt ttcatacccc tctttctgta tgctcacatg caacaagaac ttgctggcaa  
4741 agttttgata aaggtgattg tggcggagaa aaagataaag aactcatcga tcgcgtagga  
4801 aataaattta aacatgcctc tacttttagaa catttaaatt atacttttta tattcaagga  
4861 atttcaaggg cttgcttaca agaagttgct agacatcgtc atacaagccc tagtgttaaa  
4921 agcacgcgct atactctaaa agaacttcgc aatgaaagtg aatttaagat aggagatttt  
4981 gaaaacgcaa gccgatatct tgttctttgc ggtaacgaag aagttgataa tgctagcatt  
5041 caagctttag aaaacttacg cttattttta caaaaagca taagcttggga tatagccaaa  
5101 tactgcttgc ctgagagtta taaaaccgaa cttactttta caatcaatgc tagaagtttg  
5161 caaaatttta tttctttgcg tagctcaaaa tctgctcttt gggagattcg aaatttggcc  
5221 aatgctttat ttgaagcctt accacaagat catcaattta ttttcgagca ttgtttgcat  
5281 aaagatattc attaaatcat acttatttta tcttatttat aatattttta tggattatc  
5341 cataagatca aggttttatg gatatacttt aaatatattt catacttgat atagtttctt  
5401 acaaggactt tttatggata aacaattttt tcaaatgttt ttaatgttct cgcaaataca  
5461 aactgtagct attattgctg tgctttttgt aattttttac attcttaaaa aaatgcgaga  
5521 taaaaaggta aatttctccc ttcgatgct ttttgccctt tttatagggt taggtttagg  
5581 ttttgcttta caatatctag ctcaatttcc agatagtaaa gaagcaagta ctatcatttg  
5641 gtacaatgaa gcaaaacatt ggtttgggtt tgtaagctca gttttttag cttttataaa  
5701 aatgttagtt attccgcttg tgggtatttg tatcattaaa gtgattatag aaattgataa  
5761 aaatataaaa atttcttctt tgcttgggtat aagcctcttt tggatacttt ttagtactgc  
5821 tatagctgct tctttaggta tattgctagc ttataatttt caattgggtg ataattttac  
5881 tgcttatgaa ggagcaagac aaattcgtga aattcaaact ttttcgagta ttattttagg  
5941 ttttaattcct agcaatatca tttctgttat gaataaagaa aatatcatag ccattgtaat  
6001 ttttgctttt tttgtaggaa tttgtgcaaa aaaagtcca aaaaaagaag aatatacaca  
6061 agcttttcaa acttttgaaa attttgcctt agttttttat aatattatga tgaatatgac  
6121 agctacggtg attcgattta tgccttatgc tgtagtttgc atgatggcaa atgttttatt  
6181 aagcaatggg tttgaagcaa tcaaaactgc aggacttttt atcattctta cctatatagc  
6241 tatgtttata atgtttggag tgcatttttt acttcttgct tctcaaggat taaaccctat

6301 aaaatacgcg aaaaaagcctt ttcctgtatg gttgtttgca ttcagttcaa gatcttcttt  
6361 agggactttg cctatgacga cttcaacttt gcaaaaacaaa tttggagtaa atcctgccgt  
6421 ggctaatttt gttgcctcta taggaacaac aacgggactt aatggttgtg cgggttattt  
6481 tccggctatg gcagcagttt ttgtggcatt tgctacgcac acgcctatag attttacttt  
6541 tgctttgatg atagtattag tagctgttat cggatcttta ggtattgctg gagttcctgg  
6601 aagtgcgact atggcagcctt ctattatgct cgcagggatt ggatttgggg ataattttgt  
6661 tatgcttagc cttatttttag ccattgatcc tatcattgat atggcaagaa ctgctagcaa  
6721 tgtttcagga gctatgactt cagcgctttg tactgcaaaa aatttaaaag ccatagataa  
6781 agaaatttac aattcttaaa aagatttaaa cctaataatag gtttaaatcc tcattggcaa  
6841 cttcacatt ctatgctacg atcagcaaca tttatctttt cgctatcagg actttcgctt  
6901 cttagatagt aagttgattt tactcctagc tccaagcta gttgatatat atcatttaag  
6961 tagcctccac ttgctttatc aagtataaa aagatattta agctttgtcc ttgatcaatc  
7021 cttttccac gcactgctgc agctttaaca agaattcttt gatcaagttc gtaagctggg  
7081 gtataaact gcccaagtttc aagacttaaa ttaggcacta caacaggtat catgccgctt  
7141 aaattttgct caaaccactt acgcttatag acaggttcga tagtttgtgt tgttcctacc  
7201 aaaatagaaa ttgaagaagt aggagcaata gccatcaaat aaccatttct catgccatct  
7261 gcttttactt tttctctaag tttatcccaa tcgcattcgc tttgattaaa caatccttct  
7321 cttagagtta aagctttggc tttttcactt gctacatcaa taggaaaaat ccccttactc  
7381 caatttgatc cttcaaaatc aggataagaa ctttttcta tcgctaaatt tgagcttgcg  
7441 ttaatagcct catagctaatt tttctccata atttcatcga ttttgtttaa atgctcatca  
7501 ctgccccaat gaattcctgc ttcagcaagc atttgtgcct cgcccataac gcccaagtcct  
7561 atggctcgag attttaaatt tgtatccttt acttttctat gagggtaaaa atttaaatca  
7621 ataacattat caagcatagc aatagcagtt ggcaccacgc gctctatatc ttctttggta  
7681 tataccttgc taagatttat gcttgctaga ttacaaactg cggtttttcc atcgtttta  
7741 tatttttcta cgatatagac tttgtttcca ttaaagctat caagagttga aattttctta  
7801 gcaggctttt catatcccc atcgataaca acgcgttctt cttcatcaaa atgtttttca  
7861 tcaccatttt caaatataac ttttaatttt taataatttg gctctgtatt ttgaaaaatt  
7921 tctgtacata aatttgaact tctgatgatc cctacatgtg catttggatt ggctttattt  
7981 gcattatctt taaaacataa aaaaggcaaa cctgtttcaa aataattaag caaaatcttt  
8041 ttccaaagct ctttagcttc tactatttct ttaactatac tttcatcttt ttcgtactct  
8101 tcataacgct tttcaaaagc ttccccgtat aaatcacaca aatcttgtgt atccgcagga  
8161 tcaaaaagag tccatttatc atttgctcta actcttttca taaaaagatc gttaatccac  
8221 aaagcagggg aaagctcatg tgcgcggcgt ctttcttcgc ctgaattttt acgcaaatcg  
8281 ataaaatcac ttacatccat atgccaaagt tcgatataaa cagcgatcgc accctttctt  
8341 gtgccaagct gatccacagc cacagctata tcattagtaa tttttaaaaa aggaataata  
8401 ccccctgcag cgtttttatg cccatctata cttccacca ttgcacgaac tttagaccaa  
8461 tcccagccta tacctccgcc aaatttagac aataatgcca tttcttgata agaatacaaaa  
8521 attccctcga tattatcagg agttgagcct atgtaacaag agctaagctg gtggcgtggt  
8581 gttcttgcgt ttgataaagt aggagttgca agcatgagtt caaattaga gataagatca  
8641 taaaattttt ttgccattc ttgaggattg aattcattct gtgctaaaaa catagcaata  
8701 gccataaaca tttgctgagg aagttctata ggcataccct tgctatcttt aatcaaatat  
8761 ctatcgata gagttttaat gccaaagatag gtaaatgca tatcgcgctt aggcataata  
8821 taatcattta aatcatctaa atcgtatttt tctttaagcc cgagtaaaat tctaccttc  
8881 ttttcgccct tttcaaaata ctgcgtaaa tgattataac gattcattcc attcatttt  
8941 ttatacaagt caaacaacaaa aagtctagcc gcaacaaaag tccagtttgg acaatcaata  
9001 tcgattttat ccacagcagt tttaatcaat gttttttgaa tttcttcagt tgaattcca  
9061 tctcgaaatt gaatttttagc atcaagctcg agctcgttga gattaacacc ttctaaatct  
9121 tttatagcat caaaagtgca ttttttgatc ttagaaacgt ctaattcttc tgtgcgacca  
9181 tttcttttaa taactttcat tgtattcctt gtccttattt aaaagttctt gcaagattg  
9241 catcaacatt ttttgtgtaa taattataat caaagcactt tcttatatct tcttcattca  
9301 agctttttct caaatcctca tcagctaaaa gcgcaagtaa aaataagctt tcattgtttt  
9361 cattgatagc agctttacca ttttgtaaat cagcccaaac tttcatcgca tttctttgga  
9421 ctattttata agcttcttca cggctaattgc ctttaaatgg aagctccaat aaaacgcggt  
9481 gtgaaaatac aagtccgcct gtaagattta gatttttcat catattttca ggataaacca

9541 aaagcttatc aatcaaattt gtaagacgca tgagcataaa atcagctgta acaaaagcat  
9601 caggcaagat aaatctttca acacttgaat gcgatataatc tctttcgtgc cataaagcta  
9661 cttttccaa agcaggagtt acaaaagatc taagcacacg acaaagtcct gtgatatttt  
9721 cacttagaac tggatttctt ttatgtggca tagccgagct tcctttttgt cctgcactaa  
9781 aatactcttc agcctcatac acttctgttc tttgaaaatg tcttatcgca acagcaattt  
9841 gctcgcacga tgaagccaaa atcgcaatag ctgaaatcac ttgcgcataa cgatctcttt  
9901 ggataacttg atttgaaaca ggcgcgggtt taagatctaa atttttacat acttcttctt  
9961 caaattttta aggagcatgg gcaaaatttc ccattgcacc gctaattttt ccatagctta  
10021 tcacttctct tgcatgctct aaaagctctt ttgcatgcaa aatttcatca taccaaatcg  
10081 caagtaccaa accaaaagt ataggctctc catgaattcc atggcttcta cctaccatta  
10141 aagtattttt atgttccaaa gcgctttttt taatcacttc taaaagcaaa gaaacatctt  
10201 ctaaaatcaa atccaagctt tcttttatct gtaaagctac agcagtgctg atacaatcag  
10261 aacttgatc tgacataatgt acaaaacgac tttcctctcc taaactttca cttacacttg  
10321 taagaaaagc gatcacatca tgcttagtgg ttttttctat ctcatcaatt ctagctatat  
10381 caaatttagc atttttaaga atttttcac aatctgtatc atttataagg cctagtttat  
10441 tccaagcttt tacagcagct agctctactt ttagccatgc atcatatttt gcttgcatat  
10501 cccatttttt ggccatgatt tctctgctat atctttcaac catctttgaa acctttttag  
10561 ctataatttt aaaaataatg aaaatggaat tttatctaaa aaaattttaga gaaaggttaa  
10621 gtttggctta cacaaaaata aaactgtcaa ataatggaaa aaaggcgttt caagtgccta  
10681 tagataattt gaaaatcaat ataaatgaag ccaaaaaact catagataaa aaaaggcttt  
10741 tttgcaatgg aatttttagta gaagaaaaga ataaaatctt acaaggtaat gtagaattaa  
10801 tagtctatga aaacaacccc aaaggagtag aaatcgcttt tgaaaatgaa gattttgcag  
10861 tacttgaaaa agaaagtgga attttaagcc accctaattg tagacactgc aaatacagcc  
10921 ttagtgatga aatttggcac ctttggggta aggaagcgtg tgtagctcat aggcttgata  
10981 aagaaacaag cggactcata ctctgtagcca aacacaaaaa agcacaatt gagcttaag  
11041 gcctgtttga aaaaaaaca attcaaaaag aatatcttgc ctttgcaagt ggggaaatca  
11101 aagcaaattt catagtcgat caagcgatgg atttgacaaa ggattatgat gacgttaaaa  
11161 ccagaatgca aatttgcgag aatggaaaaa aagcgatcac agaatttgaa gttttgagct  
11221 tttatcctaa aatcaatgct acgcttttgc tttgcaaacc actcacaggc agacaacatc  
11281 aatcagagt acattttatt tataaaaaatc acaaaatcct aggcgatcca ctctatggtc  
11341 ttgaaaaaaa agatatagaa aaaattttag atgaaaaaat ggacatagaa gaacgcataa  
11401 agctaagcgg tgccaaacgc ttgtgtttgc actcttatcg tttaaaattt aactatgatg  
11461 gagaaaattt tgatattttt tcaaaaaagg gtatagaaaa aattttaaca gcattttaaa  
11521 acaaaactga tattttattt catatctaac aagctatcat tttttataaa aaaattttaa  
11581 aataagaatt tactttttgt taaaaattta gtataatcac aaaataaaaa tactaggatt  
11641 ttataaatga aatttgttaa ttttaaactc aatcaaaaag ccactctagg ggtgcttaac  
11701 tctagtggaa aagttataaa ttttagccgat cttgatataca atgttcgcga tatgaatgaa  
11761 ttgattataa attttgataa ttttaaactc aaattttaaag attttagattc taaaacagct  
11821 tatgaaattc caaaagaaga ttatctagcc cctatcatag aaccgcgtca agatattata  
11881 tgtcttggga ttaatttttt agatcatgcc aaagaatctg cacaatttaa aggcgaaaaa  
11941 ttcgaagaaa gagaatatcc tgtgtatttt ggaaaacgct gcaatcaagc cacagctcct  
12001 tttggcagca tatctttgca tgctgatgtc acttctcaac tagactatga atgcgagctt  
12061 gctttcattt taagtaaaga tgcttataaa atcaaagcag aagatgcgaa agactatatt  
12121 tttggctata ccattatcaa tgaatttca gcacgagatc tccaaaaacg ccacaagcaa  
12181 ttttaccgcg caaaaagcct tgagggaagc actataatgg gaccttatat tacaagtgtt  
12241 gatgagattg cttatccgcc cgagcttaat ttacaaagtt atgtcaataa agaattgcga  
12301 caaaattcca atacaaaatt ttttattttt gacatcggat atgtcttaga agaactaagc  
12361 tcaggaatgc ttttaaaggc tgggtactatc atatcaatgg gaactccaag tggcgtagga  
12421 atgggcttaa atccaccctg ttttcttaaa aaaggatgat aagtagctg tgtgatagaa  
12481 aatttaggag aaatttgcaa tgaataaca taaaatctca ttaaaaatca tagaaatggt  
12541 ttttacgaaa ttttaataaaa aggagatatc atggagtttt tagagctttt attagtttta  
12601 atcgccttaa tactaatcat caaaaagcca gaaaaagaaa atttggcttt tggcttagtg  
12661 atagtagctt ggcttttaat ggtttttttc tatatcggcc acaaaacagg tgcgctttta  
12721 acgataatga atctatgaag aaaggctgaa gaatgaacga aataaataaa acaaaaaatt

12781 tctacactct tatgtgtttg gcaggctttt tgattattct tttgcctgtg gggattgcaa  
12841 attttgtatt tggttatatg tggggtgata gcccatgcac tctttgttgg ggacaaagag  
12901 aagcgatgat ttttatcggg gttatggcac tttttatcgt gcgttatggg atgaaaggca  
12961 aataccttgc cgctcttttg atcatgactg cagtaggtct ttatcaatct tttgcacatt  
13021 atggcaatca cgctcatagg gatttagatc aaggttttgg tttggcggtt tttggtatcc  
13081 atacttattt ttgggctgaa gtagtctttt gggctgtagt cttgctttta ggtgtgatgt  
13141 ttgcttttgc tcctaaattt ggatcttttg acaaagaatt aaacggcgaa aaatthagaa  
13201 aatttactaa attttagcttc gcagcagttt taatcagcac cttatcgtt gcatcaaag  
13261 tctttcaagc ttttgtaagc acaggaattc ctccttatgt ggggcaaggt gatcctgtaa  
13321 gatttagtct taatccaaaa tataatcattt ggagcacagg gggttggaat ggtttatggc  
13381 aaaacatttc tttcttagga aaacgcgatg taaaggctcc tgattatgct tttgcacctg  
13441 caagtgaaaa attaggtata aaatgtgata atgatacaaa taattctcca tttgcagaaa  
13501 tcgacgatga gcttaaaatt atcgatgaac aaaccataaa ttttgacaaa gcgatcaata  
13561 ctcttgatta tattaatgat gaatgttag caagttctaa atgggatgta gcgtttttgg  
13621 ataacaattt tagcacaata gaaggttttg agcttgatcc ttatttttca gctactatcg  
13681 atcctattat aggtatcatt cttataaag aaaataaatt tcttctcatg ggatccaata  
13741 aatctttcct aagatgtgca aaaaatccaa atgcagatga agctttacaa tatgcagatt  
13801 ttgttaaagg aatgaccaa tttgaaggtc aaggaaaaga tttgggtcgt ggaagacttg  
13861 atactgttag agcaaaattc aaccatgtag caagtatgac aacagatgat cattatcttt  
13921 atcttgcaac cgtgcctaac aacaaagatt ctaaaacctt tgtaatttct aaaatcttct  
13981 taaaagatct tgttctttca gcagaattta ctccaaaagc agaacttaaa gagggtaaaa  
14041 ctttgggcga tctttatatc acttctatgg cttttaaaga tgatgaaatt tatgactca  
14101 gtaaaaaatca caatgtaatt gccataatca atccaaccaa agaagaagtg gtaaaaacca  
14161 tagcttttcc aagctctatc acaaatgcaa gaagtatttt ctttaaagat ggaaaaattc  
14221 acatcctttc ttatcaagat ggagcaata agctttatac tttaaaataa atttgaagtc  
14281 ctagtgattc taggacttaa tttccatttt gattaaaata aaaccaaata catctttata  
14341 ttctcccact ttttcaaatc caaatTTTTg ataaaatttt aaagcatttg gattatcaag  
14401 attaacttct actttcttga tcttaaaatc atctaaagct ttttgtaaaa gcttggagcc  
14461 aatTTTTtta cgaaaatatt ctggTTTTac aaaaagcatt tgaatacatt ctttatcagc  
14521 tcctaaaaat ccacaaaatt catcattttt gtaggcaaat aaaaaattta aatctttaa  
14581 atcagcattt tgtaaatatt ctttaatagt tcgaaaattt ttttcatcta aaaaattatg  
14641 cgttgcctta acgctttgct cccaaatttc taaaagtcct ttagcttgtt cttgattcaa  
14701 tttttcataa tgttttatca ttttcacaat cttttatatt ttttatattc gattttatct  
14761 ttaaactctg ccctttcaaa acctcttaa cgaagcaaac aactatcaca ttctccaca  
14821 gcttcatctt cgctttcata acaagaccaa gtaagctcta aaggcacatt ttcttttaa  
14881 gcaagctcta caatgtgagt tttgttaaga tttacgagag gggTTTTta agaagttata  
14941 aaatgcttac ttgtgccttc attgataaat tcttgagctt tttgtataaa tttttcagta  
15001 caatcaggat aaccgctacc atcttcttct actacaccta taaaaatact ttcacaattt  
15061 tccttttccg ctaaagatcc tgctatgctt aaaaaattc cattgcgaaa aggacataa  
15121 gtaataggcg gagtatcgct tatgctcagc tcatttttag ggatattgat actttgatct  
15181 gttagagcat tacctcctat atttgctata aaactcacat caaaaatata agatTTTTct  
15241 acatttaaag cttgcaaat ttgcttaaaa cactctttt cttttcttg tgtgcgttgt  
15301 tgataatcaa aatgcaaggc aataatctca tatcttctt ttttgccaa ataagcacac  
15361 aaagtgctat ccattccacc gctaatgata caaagtgctt ttttactcat ttttatatcc  
15421 ttaaatttgc tgtttttgca attctagcaa atatTTTTa aaatttacac ttagtgtaaa  
15481 gtccattttt aacactatgt aataatggct aacaatctat gtttcatctc atttgactta  
15541 aattcaaat agtgatatga taatggtatt taaaaagggc tggggagcac caaatcatta  
15601 attctatttt tatggatgat tttaggattt gcgaagtatt ttaaaaaaat actaatctta  
15661 aaatttcatc cataaaagca gattctacaa atcacaaaa actacactca atcattcaaa  
15721 tttcatatcg attcaatctc ttcttcaatt tatttattat tttaaaaaat aaaatgataa  
15781 aatttgaaaa aaattaaaag gcgatttaaa tgataaatat aaaacttata gaacatattt  
15841 tcaaagcagc ttccatcagt cgttggaaatg attatccaag aatggcaaat ttagtcgagc  
15901 ttgataaaca agcgcataaa tttatcatag cttatttcat tgcaaaaatg gaaaaagatg  
15961 tggatatgaa aattatcata gaggggtgaa ttttgaatt ttttaagccgc gttgtagtta



16021 ctgatatacg ccctgatgta tatcatgaaa tcgtacgtca aaaaaaagcc gaagttaatg  
16081 cttgggtttt aagtaaaatc gaacccatga tagaagatat agaagatgga gagtttttaa  
16141 agcgttttga agcgtatcta aatggcaata cctatgcaa agaaaggctt atcttaaaag  
16201 ctgcatcgta ttttgctaca agatgggaat ttaacatagt ctatcaaacc tcagcttttt  
16261 taaatgatat cgatgagatt aaaaacaaag tcgatgaaga attggaagat tattatgaac  
16321 tcataggagc tagaaaaatc gctcttaatc aaaaaattgc aaaaatcatc gatttaagcg  
16381 gaagacttcg ttttcaaaag cgttgggctc aaaccccacg catacctgaa actgctgttt  
16441 taggacatat gcttgtagt gcgattttgg gatattttta ttcacttaaa atcaaagctt  
16501 gcgataaaaag gcttgaaaac aatttttatt gtgctttatt tcatgattta cctgaatcct  
16561 taacacgcga tatcatcagc cctgtaaaat atggcataga tggacttcac actattatca  
16621 atgattatga aatgaaactg atcaatgaca gaattttacc cttcgtgcct gaaaatftaa  
16681 gggctgaatt ttcttatatc ttaggcatta gagagggcag aagcaatgaa gcaaatfttg  
16741 tcaaaaatga atttgaaaat cgcacctata aaaatgcaa aatcgagctt tghtagtgga  
16801 gcttaagctc ttttaaatcaa aatgaatftg gagcgattga tggttaaggct ttaaaatact  
16861 gcgacaaaat cgctgctttt atcgaagcag gacttagtat aagctatggg gtaaaatcta  
16921 aagaacttga aagcggtttt gaagatatgt ttaaattttt taacgaaagc cctacgattg  
16981 atggggtaaa tttccttgaa atttgtagag aatfttaggga ttattfttaaa atftaatcct  
17041 atfttgatta taaactcaa gagcggaatg aaagaactct ttcattccat atctaaaact  
17101 gcacccttac tagcattftgt tacaagfttt tgatacattc taagccatct ggattftgact  
17161 tctftttgag gcattacaaa ttcattftttg cgtftttgcaa tttcctcatc gcttaaatfta  
17221 gcattgatag tataagcatc tacatcgatt tctatctcat ctccatctft taaaagccct  
17281 ataagcccgc cctcagcagc ttcaggagaa acatgaccta tgcttaaac ccttgttgca  
17341 ccgctaaatc ttccatcggg aatcaaagcc acatccgcac caagcccat acccatgata  
17401 agtgaagftg gacttaacat ctcttgcata cctggaccac cftttggccc ttcataacgg  
17461 atcacgcaa catcgcctft ttgtactfta cftftaatga tacctftaat agcctcatct  
17521 tgagaatfta aacaaacagc tftgcccftg aatfttctct ctcctgtaat acctgcagft  
17581 tftacaacac agcctftgct agccaaatft ccaaataaaa ccgcaagccc ccctactfta  
17641 gaataagcat tatctacctt acgaatgatg gfttcatctt tgattfttggc atftftftaa  
17701 cgctcttgta aatfttctcc tgtgatggft aaagcatcaa gfttcaaat atgccctftc  
17761 ctgcttgaaa tftcagccat tacagcactt acaccccctg cftftatggat atcatccata  
17821 taaacagtat taagtgatgg agcgatfttt gcaatatgcg caacctftgct tgaataaaaa  
17881 tftaaatcct tgatatcaag cgcaactcct gcttctcttg aaatagctag catatgtaag  
17941 attgtatftg tgcttccacc cattgccata tctactacca tagcattftct tatagcfttt  
18001 tgagtgataa tftftftaat tftaaatcct tcatctaaag cgatttcaca aatfttctcft  
18061 gcagccfttc ttaaaagctc tftctfttct tftgctaagcg ctaaaatcgt accatfttccc  
18121 tccaaagcta taccatagc tftcacataaa gtattcatag aatfttgcagft aaacataccc  
18181 gagcaagatc ctccgctftg acaagcagaa cattctatat cftftaaatc tfttctgctg  
18241 atfttattgg cctcatatgc tcctacagcc tcaaaaactg aactaagact tftftftftca  
18301 ccftftfttag tcacaccga acgcatagga ccaccgctta caaaaatagt cggtagatft  
18361 accftftaaag caccatttag catacctggg gtgattftat cgcaatfttgg aatacaaat  
18421 aaagcatcta gctgatgtgc attcataacg cftftcaaccg aatfttgcgat gatttcacgg  
18481 ctcggtaaag aataaagcat accctcatga cccatagcta taccatcatc cacacctata  
18541 gtattaaatft caaaaggaat gcaaccatft tftcgaatft catctftftat aatftfttgc  
18601 tattcatfta aaaaataatg ccctggaata atatcaatat agctatfttgc cagcctatg  
18661 aaaggtftat caaaatcctc atctftftaa ccacatgctc taagtaaaga gcggtfttgg  
18721 gctftftaaat gccctftftt aatcgcatca cfttctacta aaaactcctt aatftftftt  
18781 taatattata acttaatftt cataaaatft acttgcaaga aacaagctft ctatacatat  
18841 tfttcatcaa ttgacaaaaa tftftftfta taatacaatg cftftftgatt atcaaaaagg  
18901 agtgcaaat gagacaatat gaatcctata aatgtcaaaa atgcggtaac gaagtagaag  
18961 tftcaaatgt aggcggftgga aaacttagct gfttgtgftgft tgagatggag tgtatcactc  
19021 aagatftaac tgcgftaaat ttgatgaaag cftftgctgg agaatcaatg gctagaata  
19081 aatacgaftt atfttgcagat gtagctgaag aagaaggatg gcacgcgftt gcaagacatt  
19141 ttagagaagc agcagaaaat gaaaaatggc atgcaagagc tgaatfttaaa gcttatcacg  
19201 aatcgtftga tggcaaacct ttagaagfta caactaaaa cfttagfttgc gcggtgagg

19261 gtgaaaacta cgaacatacc accatgtatc caaattttgc taaaatcgct gaagatgaag  
19321 gtaaaaaagc tatagcaaga ttattttactg cgattggaaa agtagaaata gaacacgaaa  
19381 gagaatacct agcccttaaa aaaatgcttg aagaggaaga attctttaat agcgaagtag  
19441 aagaactatg ggtttgtgaa gtttgtggac atatccatcg tggcaaaaaa gtcctgcag  
19501 cctgtccttt atgtaaagca cctaaagaat actttaagcg tgaattttta ggctaaatcc  
19561 ttgggcgatt tttcgccctt tcttagagaa aatttgaaaa ctttatttga agaaaaacgaa  
19621 cttttaactc catttgatat tgatttagtt ggcattgatg aagcaggacg aggtgcctta  
19681 gcaggtccta tgatgatggc agcttgtaaa ctacacaaag atcttgaagg gctttgtgat  
19741 tctaaaaaat tgagcgaaaa aagacgcgaa gaactttatg aaatcatctt gcttcattca  
19801 gattatctca tccttgcttt ttcttcagaa aaaattgatg aaatagggct tagcgcttgt  
19861 ttaaaaatgg gtttaacgct cataaaaaaa cactttaaaa cagaaaataa tttcttatac  
19921 gatggcaata caaatttagg cattagcggg ataaaaactc aaatcaaagc cgatgccaat  
19981 atcaacaag taagtgcagc aagtatactt gcaaaggtga gtaaagatag ggtgatgaat  
20041 tttttagcta aagattttcc ttgctatgag tttgaaaaaa acaaggctta tgggacaaaa  
20101 gcccataagg aattgatagc aaaatttggg atttgcaagc ttcacgcaa aagttttaa  
20161 cttttatgat tgctttgcta aattctcatg tatgcttaa gcacactcta taccatcttt  
20221 tatagcccaa acgactaaag attgtccttt tctagcatct ccacaagcaa agattttttc  
20281 atgtgtgggt tggaatttct ttgttttgac attgtttttc tcatccaaac ttactccaaa  
20341 attactagcg atagcatctt cacttccgct aaaaccata gccaaaagca ctaaaccgct  
20401 tttatagttt tgattagaat ttggaagttc gacatttata gccttgcctt ctttgaattc  
20461 gcgtttttaa tcacatgctt ctacgctttc tactttatct ttacctaaga atttttttgt  
20521 cattttttga tattctctag gatctttttc atatacagca atggcttctt ctaaaccata  
20581 atctgtcgtg aagatatcag cttttaaagg ccaaggattg ttttggcttc tttgtaaagg  
20641 tctttttgga cttctttcaa aacgcactat ggacttagct cttgtctttg tagctacagc  
20701 gatacaatca acgcttgat ccccacttcc tataaccaag acattttttac cttttgctgt  
20761 gtcagcacc ttgcctgttt ttagcaaggt ttttgtattt tgcgttaaga aatcaagagc  
20821 aaattcaaca ccctttagtt ttctaccctc tatatcaaga tcgatagggt tgctcgtcc  
20881 tgtgcaaagc actaaagcat caaattcttt taaaagttta gaaaccttat ctttgctgtc  
20941 tatattttca tttaccttaa attctatacc actttctttg agtaaataca cgcgtctatc  
21001 gactatactt ttatcaagct tcatatcagg aattccatac attaaaagcc cgcccacttt  
21061 atcgcttctt tcaaaaacac ttaccttgta gccaaagtga tttagggtat tagcacaagc  
21121 aagtccagca ggcccacttc ctatgatggc gattttttta ccattgtatt gtttaggttt  
21181 gtttggactt actaaatfff ctttaaaagc attttctatg atggctagct cgttatffff  
21241 gatacttacg ctttttccat taatcgca caacacaagaa tcctcacaag gagccggaca  
21301 aacacggccg gtaaatcag gaaaaggatt ggtaagatca agtctttcat aagcttcttt  
21361 ccataaagaa cgataaataa gatcattcca ttcagggatg agattgttta aaggacagcc  
21421 tacatccttg ctttactca tcacaccggt atggcaaaat gctaccccac aatccataca  
21481 tcgtccgcc tgaatttctt gttctttctt gtctaaaagc gttgtaaatt ctttgaat  
21541 taaaactctt tctttaggag caactttttt aaaatctacc cttttaaaat ctaaaaaacc  
21601 tcttgcatth cccattttta ctcttattt ttgtgtgatt ttcaaaaatg ctgcaaaact  
21661 tggatcttct tcatctttgc aaagctcgat catctctaac attttttcat aatctcttgg  
21721 cataacttta aaaaagtctt ttttgtcaaa tttttcgagt atatccttag cttttttaga  
21781 attagtataa gcgatatgat tttctatcat cgttttttaa tctttttcat ctttagcgct  
21841 aagatcttta atatccaca gctcggatatt tacatgagct tcattgtgtc ttccaaagat  
21901 ataaaccaca cccccgctca tacctgcagc aaagttcgca cccacatcgc caagcactac  
21961 gacaagcccc cctgtcatat actcacaacc atgcacaccg gttcctaaaa ctaccgcttt  
22021 agctcctgaa tttcttacac aaaatctttc tctgtctata ccatctaaat acacttcacc  
22081 ctcggttgct ccatacaaac aagcatttcc tgcgatgata ttttcttcag gtgagaaagt  
22141 agcttcattt gaaattttag cgatgatctt acctccgctt aaacccttac ctagataatc  
22201 attgctatca cctacgatct caagcttaat accctttaac aaaaatgctc caaagctatt  
22261 acctgcattt cctatggctt tgatttgtat gctatcttca cttaaagcgt ctttgccata  
22321 agtttttaga atttcacttg aaagcatagt agcaaaagta cgactttgat ttctacttc  
22381 taaagagagt ttgataggct cttttttctc cacagcattt ttacaaagtg ggagtaaaat  
22441 tctataatca atcgtttttt caagtttatt gtctttatag tctttaaaat gcacagcggg

22501 tctgttatag gtaggtaagg attttaaaat tttatccaaa ttcacttttac ctgctttacc  
22561 ttgcataggt ttttgacgga gtttatcgac tcttcctatc atatcatcaa ggcgttcaaa  
22621 accaagtctt gccatatatt ctctaagctc ttcagctata aaatacatga aattaaccac  
22681 atcatctact ttgccttttaa aacgatctct aagttcttta tcttgagtgg caataccaaa  
22741 aggacaagta ttaagatgac aaactctcat catcgtacag ccataacaa tcaaaggcgc  
22801 agtagcaaag ccaaatctt cagctcctaa aagtgacgct atagctaaat cgcgtccatt  
22861 catcagcttt ccatcggttt ctaatcttac tctatctcta agcttgttta agatcaaagt  
22921 ttgatgcggt tcagctaagc ctaactcca aggaattccc gcatgtggta tagaagttct  
22981 agggcttgct cctgttctc catcataacc tgaacaagg attaaattcg ctctgcttt  
23041 tgccacacct gcagcaactg ttcctatacc gttttcactt acaagtttta ctgaaatttt  
23101 ggcgtctttg ttcgcatttt ttaaatacata aatgagttga gccaaatcct caatagaata  
23161 aatatcatga tgaggtggtg gagaaatcag cgtcacacc gctgtagaat gtctagcctt  
23221 agctatccaa ggataaacct taaagcccat taattgtccg ccctcacctg gttttgcacc  
23281 ttgagcgact ttgatttgta attcttttgc gtgggttaaa taatttaaat ccaccccaaa  
23341 acgcccactt gctacttggt tgatagcgga atttttattg actccatctt tgatttcata  
23401 gcgttcctca tcttcaccgc cctcgcctga atttgatttt cgcctatctt tattcatcgc  
23461 ttctgctaag cactcatgag cttctttaga aatagaacca taactcatag cacctgttct  
23521 aaaacgctta actatacttt cagcactttc gaccttgta atactgatag cctcactaaa  
23581 atcaaattcc attaaagaac gcaaattcac ttgtttttca tcaactaagg cagagtattt  
23641 tttaaagctt ttatagtctt tattgcgaca agcttgctga agattaaaaa tcacaagtggt  
23701 atcgattaag tgttcttctt tagcacttct aaagctgtga attccttttag aatctaaagc  
23761 cttatgtgta tcattaaaag cgtgtttatg taaagcgata agttcttttt caaaatcttc  
23821 taaatccata ccctcaatgc gtgaagttgt agaagtaaag ttttatcaa tcactttaga  
23881 acttaagccc aaacactcaa aaagagcaga gccattataa ctttgtaaag tagaaactcc  
23941 ctttttagaa gcaattttta ctataccact tgaacttgct ttgatgaaat tttctaccgc  
24001 tttatcataa cttacattta agtctttatt ttctataagt ttttgatgct tttcataaac  
24061 caaataagga tttataactg ttgcaccata gcctaaaaga caagcaaat gatgaatttc  
24121 tcttggtcctca ccactttcta tgataatgct tgtgtgagtt cttaaattct ttcttaccaa  
24181 ataattatgc acgcccgaac cgcgaagtaa agcagggata taagcatttt tatcatccac  
24241 ccctttatcg cttaagatga tgatagaaac acctttttta atctcttctt ctatttttac  
24301 acaaagatta tctaaagctt gttctaaagt aacttttagaa tactcataaa gtatagaaaa  
24361 ttcttttaact tggaaattgt ttaaagcctt aacctcgaaa agctcttcat tgcttataat  
24421 aggcaaagaa attttaacac gctttgcatt attttcatcc ggtttttagca aattcccttc  
24481 acttcctaaa tataccttg tagaagtaac aatctcttct cttatcgcac taaagggtgg  
24541 attagtcact tgagcaaaaa gttgttttaa ataattatac aaaggctgat aagtcttaga  
24601 aagaatagcc aaaggagtat ccacacccat agccgctaaa gcttctttgc cattttgtgc  
24661 catgcttgct acactcattt taagctcatc atagctccat ccaaaagctt tttgaagttt  
24721 taaaacctca tcttctttta aaaatttatg tttataaacc ccgctgtggt gtttttcaag  
24781 ctctactaaa tttttaagcc attgtttata aggcttcgca ttagcataat gctctttgat  
24841 ttcattatcg gctattacc tacctcttgc agtatctaca agtaaaagt ttccagggtc  
24901 taagcgtttt ttagctttga tattgttttc atcaagtttt aaagctcctg tttcgcttga  
24961 aagtatgagc atatcatctt ttgtaagata atatcttgaa ggacgaaaac catttctatc  
25021 taaactcgcc ccatgataa ccccatcagt aaaaactata gcagcaggtc catccaagg  
25081 ctccatcaat aaagaatgat actcataaaa agcacgcttt ttacttcca tattttcatt  
25141 tttatgcat ggttctggca ccatcatcat aaaagcttct tctaaagtgc gtccatttaa  
25201 agctaaaaat tctaaagtat tatcaaacat agcagaatcg ctacttggtt ttgctatgat  
25261 aggaaaaatt tcatctaaat tttcaaaata ttcgctctcc atcaaacctt ctctagctct  
25321 tatgctatcg acatttcctc gtatggtggt aatctctcca ttgtgtacca tatagcgatt  
25381 tggatgagct ctttcccagc ttgggaaggt attagtcgaa aagcgagaat gcaccaaagc  
25441 aatggcggat ttcatattga catctttaaa atcaagataa aaatcgctca attgagtaga  
25501 aagaagcatt cttttataaa ctatagtgcg tgaagaaaag cttgaaaaat aaaatttagg  
25561 cacatgcaa gctctttttt ctataagacg acgacaagca taaagcactc tttcaaattc  
25621 aagtcctgca ttaaccgtgc ttggtttttt taaaaagct tgtaaaaaat aaggcatagc  
25681 ctttaaagca cttgctccta tctacttagg attaaaaggc acctctctaa aacctagaaa

25741 ttctaaatTT ttatctTTta aaccttgtaa aaatatttct tttgcttctt ctttggcatc  
25801 tgcattaggt gataaaaaca tttgCGctac agcataatcg cttttttgag gaagctcaaa  
25861 accaagctct tgagtcataa aaaaatcatg aggaatctga atcaaaattc ccgctccatc  
25921 gcctgaatTT tcttcagctc ccgcaccgcc tctgtgttca agattcatca aaatTTctaa  
25981 agcgtcacia ataaccttat aagaagcaat accgcgtata ttggcaactg cggcaatacc  
26041 acaggcatcg tgttcatttt tagggTgata taaacctacg ctttgattgt tttctaagat  
26101 atTTTccaaa tccattttat tctccttata agattgattt taaatTTgat agcttgTtaa  
26161 ggattataac atatattttt ttaatatcga gatatttttt atcttaaaaa taaataaatt  
26221 aaaaaatatt tcaatggatt tataaaaatt ataaaaacat cgctatgata cttcctaaaa  
26281 tcagcaaagg cccattataa aaaataaaaag tagggataca agtatctttt atatgatcgt  
26341 gttgcttatc tacacttaat cccacactcg ttcccatcgt cgtttcactt gctggacttc  
26401 ctgcatctcc taaagctcct gcaacccta agataaatat gataagagct gcgctaaaaac  
26461 caagctctaa gcaaagagga caaaaaagtg tagctatgat aggaatagtc caaaaagaag  
26521 tacctatacc catagtaata ataagacctt ttaaaagcat taaaaatata gccaaaaatt  
26581 tattttcttg catccaaggg actacggaat ttacaagctc atttacagca ccactttgTt  
26641 ttaaaacctc tccataacct gccgctacia gcataacaaa agcgataaaa cccattagTt  
26701 tgagtccatc atcaaaaata tcattgacac ttttatattc aactccacc aaaatcacca  
26761 tagaaataaa acccaaaagc cctgataaag gcaaatcatt cgtaaaaaatt tGtaaaacta  
26821 aggtcaaaat aagccctact aaaacacccc attctttacg tcccattttg atattgtcaa  
26881 aatcaatTTt ttgaatTTct atttcttgat attctcttgG ttttctataa aatacaaaaa  
26941 gtgctaaaaa aagccccaat accatacaaa tagcagcata atacatcgca tttgttacat  
27001 ctactaagct gacattaacc ccatttttct ctaaattttc tcttaaaaga tcttggaat  
27061 taagtccaaa acctatgggt aaaacctat aaggtgtTgt aagtccaaag gTtaatgcac  
27121 aagcaacagc cctacgatcg atttttaatt tattaaaaag acttaaaagt ggtgggatta  
27181 acaaaggaat aaacgccaca tggataggaa tcaaattctg cgaaaaacaa gaaatcaaag  
27241 ctatagataa aagcaaaaga tattttttgt gagagataaa acgactgact accttaatca  
27301 aataagctgt taaatTTgtc cttgaaatcg cagcagcaat agcacctaaa agtatataac  
27361 ttaaagcggT ttttaattt cccttcattc catcgattaa aatactcata gttttcataa  
27421 tctcaatatg agaaaaaatt ccagcaacta aagcagaaat caaaagactc aaaagtacat  
27481 taaaacgaaa taaacaaagt aaagtcatca aaactacact gatgatgata ggatttGtaa  
27541 gcagggtcaa aatttttctc tgtgaattta tatgtgaatt tataaaagct taattctaaa  
27601 gaaaattttt ttaaaatgag ataaaaatta tcaatgaatt aatatgtaaa ttttagtaac  
27661 attaataaat atatgttact ttttttcata ttttaagataa aaattctatt attacacaaa  
27721 tttttaaaat aaaaagccta aattttattga aatttttGtt atattgaaTc ataaacattg  
27781 aaaggagtac ccatgaatTT aaatgcggag caaaaaaatg ctgttttgag atttaaaaaa  
27841 tttgttctt ttagaaacaa aatatctctt aacctatctt tgatagtGct tatttGttac  
27901 tatactttg ttctaggtat aggacttatg cctgaaattt tagggTataa actgggtcct  
27961 agttccatca cgcttggtat tatggtaggc attggcctga ttttattgtg tattatttcc  
28021 acaggaatTT acacttttat cgcaaattat tttcttgata aagagcaaga agaagtgatt  
28081 aaaaacttag aaaatgaggg attacttgat gcgttaaaag atggaaaaat caattataag  
28141 gagctagtat gaaagtcttt atatttttaa gtttaattct caatttagct ttaagcgcg  
28201 gttttgattt aggagaagt catcaaaaac ctataaatat aactgctgtt agtatgtttt  
28261 tagtctttgt tttagctact ttgtttatca cctattattc taacaaaaaa tccaaatcca  
28321 aaagtggatt ttataccgcc ggaggaaata tcacaggaat gcaaaatggt gtagctatag  
28381 cgggagatta tatgagtGca gcaagctttc ttggaatcac cgctttagtt tttactaatg  
28441 gctttgatgg acttattttat tctataggat ttttagtagg ttggcctatt attttatttt  
28501 taattgcaga aaaatTTaga aatcttgGca aatttacctt tgcagatatt accgcttatc  
28561 gtttagaagc taagcctata cgcgttatat cggctatttc tgctttaagt gttattatct  
28621 tttatcttat tgctcaaatg gtaggagcag ggcaactcat acaattgctt tttggtttgc  
28681 cttatacctt tgctgttGtt ttggttggaa ttttaatgat ttgttatgta acttttggag  
28741 gaatgcatgc aaccacttgg gtgcaaatca tcaaagccat tttacttcta gcaggggcta  
28801 cttttatggc tGttatgatt ttatatctta cgaaatttga tttaaaatat tattttgatt  
28861 tagccatttc tcatcatcca aaaggtgaaa atataatgaa accagggact tttttacctg  
28921 ataccatata agctctttct ttaggtttgG ctcttatgtt tggaaactgca ggtttacctc

28981 atatacttat gcgatTTTTT actgtaaaag atgctaaaga agctagaaaag tcagtatttt  
29041 atgcaacagg atttataggg ttttttata tacttacttt cattataggg tttggtgcca  
29101 tagcactctt acttggcaat cctcaattta ccaatgccga tggaaagtttt aatggggcta  
29161 gcaatatgat agcagtgacc ttagctgatg ttttgggtgg agatgtcttt ttaggattta  
29221 tttcagcagt ggcttttgct actatTTTTg cagtagttgc aggacttgcg atttcaggtg  
29281 caggagctat aagtcatgat ttatatgtca atgttatcaa aaaggggatg gtcaaacatg  
29341 aagatgaaat gagagttaca aaaattgcaa ctatagctat aggaattttt gctattttgc  
29401 taggcattgt ctttgaaaaa caaaatggtg cttttaccgt aggacttgct tttgctattg  
29461 ctgcgagtgt aaatTTTcct atactTTTtac tctgtattta ttggaaaaat cttaccacta  
29521 aaggtgcttt ttggggaggg ctaataggac ttatagtcgt tcttgctctt gtgattttaa  
29581 gccctagtat atgggtaaaa agttttgggt ttagtgaggc ttttttctt tatgatcatc  
29641 ctgctttatt ttcaatgcct ttaagtttta tactcattta tatcatttca aaattagata  
29701 attctaaaag agctaaaaaa gataaagaag gttttgaagc gcaagatttt agagctcaaa  
29761 gcggtgtggg agtgagtgaa gctgtggcgc attaaacaaa aaaagcttct gtgcaattta  
29821 gcaaagaagc ttttttaaat ttaaaccagt aaatattctc atttttaaa gtattttagg  
29881 actttactta acataaagtc ctttagagtt catcttttat ttataatttc tacctaaata  
29941 ctcacctaaa tactgcaatt ctttatcatt gatttcagtt ttgcgaaaa atggcatcga  
30001 atgtttacca taacgcacaa aaatcattac caaatcaggg ctcaaatccg ttctatcttc  
30061 taaaagtgca ggaattcctt gatctttata aagagctgaa agtgcatttg tcccaggcat  
30121 tccttgacca tgacatgcta tacaccactt actataaact tgctgtcctt ttctttgatt  
30181 tgcatttaat tttttagcat caacgcttga aaacgctgca ggggatcttg gattgtttgg  
30241 aatatattca taaacactta tagattcacc ctttgcaac cattctttat ccttagcatc  
30301 taaattcagc aagcaacaa ataaaaaaa aaataaagcg attttttca ttttcttta  
30361 cttcttttca ttcttaatgc gtcgcgtttg ttattgacaa aacgctcatc tcttaaattt  
30421 ttaggcaaaa tgctccacg accaggtgct aaaattccat ttggatcgat acaatcttta  
30481 agctgctcgt taaagcggcg taaaatatga ttgttataag aataagcacc cattacatca  
30541 tcttgaaaag tcggagccgc acgataatct ccccatccat gttctgcagc agtttgaacc  
30601 atttgacgat acatTTTtac cactTTTtaga ttgtgagctt tatccgttct tgagttatta  
30661 aaggctaaca taaagcaaaa tgcacgatac atccaacttc taggatgtga aaaaggtggt  
30721 ataggagatt cttcccaaaa ttctctaaat aattccatat acacttcttg gcattttaaa  
30781 agctctttac catcgcgcg aataataggt gagaaccata catgcccatac acttggtctt  
30841 aaagcctcac ctcttgctgct aagccagaaa atttccatat ttggaattcc aagagtaacc  
30901 ttatgtttta gctgctTTTT ttgctccaaa ttcaaaggta agctaaattc ttgaacgata  
30961 gaaatatcta caccctcaat gatcttaaat cttgttttga tatattctaa attcgcatag  
31021 cacacttctt tacagccata aactgaaaca tcgatattcc aataagggat tttatttttt  
31081 aaagcataat tttgaatttt atccatatca ggtaagccat ttttacttgt aagatagcct  
31141 tttactccg cattcatcgg ttttccataa ggtggattta atggactaaa atactgcggc  
31201 catcccacaa taaaactatc ctcaagataa tttaaaattt caaccgctgg gatcaaatcc  
31261 tcgctTTTTt tcattttttat agataaaagc atataatggt ctggTTTTgg catcatccaa  
31321 aagcccattt ttgtaacgat accgaagtta gattgtgaaa aaagtccatc tacataagga  
31381 ccatagccgt atttattttc tgcaaaagtc ttagctTTTT gtaaagcacc catacccggtg  
31441 cgtaaaattt ctccattagc taaaacaact tccattccac aatgtgagcc aaagtgatca  
31501 cgatacattc catagctgta tccccacca tgatctaaag cgtttccaag tggagaacc  
31561 caacctggat caggaatata taaaaaaca ttgagattat tttttctac atactcataa  
31621 agatcaaaat aactcactcc aggttcaacg atacagaaat ttcttttatc atctacttgc  
31681 atgattttat tcattctttt taaatctaca acaacctgcc ctctttgctg tggtcagaa  
31741 gaacatagc ctaaattctt acctgtggaa ataggaaaaa gaggaatttt aaattcattt  
31801 gctattttta ctatagcttg aacttcttct acatTTTtag gtgcaagtgc taaagaaggg  
31861 ataggttcgt catcatcatc ccattgcggg ctatacgcat ctctataaag atctaaatcc  
31921 tcttgggttt taaatacca ttctttacc aaagctTTTT caaattttgc tactgcagct  
31981 gtaaaatcac tttgcgaaac attttttggg aaaatcataa tttactcct tttggtgcta  
32041 aaatccaagt ataaaaatca cttgtTTTT tttcatacgc aacgcgcata ccataatccg  
32101 acgccatagt gcgaatcaca aaaaaagttg tcccactact cacacttcca ataagtgctt  
32161 tattttcaaa agcttcttta agttttgagt aaatattgct gatattcttt tcaacaagta

32221 aaatttcac tgcgttaata aaatthttctt gataaggaat ttcactatcc ttgataaaat  
32281 atttcacttg tttagcttga gaaaattcca aaaaagaagc attcaaacca gaaagacaaa  
32341 cagcacttaa agccgtagct tttaaaaaat ttctacgca aacttctaac atacatcaat  
32401 ccttttaagt attttagtatt acaaattata aatctaataa cttaaaaaat atttaaaaaa  
32461 taatttgagt aaaaataaaa tatgaattat tgtaataaag tgtgaaatth ttaaacaaaa  
32521 agatagaatt tagtgtcaaa tttaaatctg acactaaaaa atthttacaca tctaaatgth  
32581 ttacatctth agcatgtgth tggatataat cgcgtcttg ttcaacctca tgcacctga  
32641 agagattaaa ggtatcatta gcactthtg catcttcgat agtgatthtt aaaagtcttc  
32701 ttacgcttg atccatagth gtttcccaa gttgttcagg atthatttca cccaaacctt  
32761 tatagcgttg gatataagca cthtttttag catthttttc tacttcatct aagatatcta  
32821 agatatctth ttcaaagctc aaatcacgat cthttattht atthaaagata taatthgctt  
32881 cttcataaag aggggtgtaa aataaatcat cattgatgat aagthctthc aaaccttht  
32941 cagthtgac ataaatgcga atthctgtht cattgatata atgattthaa atattatgcc  
33001 cthctthttc caaaaaagct ttaacgatht taaaaagthc thcattatth tctthtgata  
33061 agtcaggath ttcgatcaag tatctgatca cagaaatcac atthgaaagc thtttaagct  
33121 catttaatac cgagcgataa gcggcaacga thtttagaaa atctthttaa tcatthtaagc  
33181 caatthcttc ataattgaa cthtcaatth ctgthtcgat tagataatca thtaagctt  
33241 thtcatctth gagataaath tctthcttht gactthttt atagcggtaa agcggthgth  
33301 gggcaagata aatgtgtcca ttagccaaa gthcattcat aaaacggaag aagaaagth  
33361 aaagtagag thgtatgtga gaacctcta catcgcatc tgtcatgata atgatttht  
33421 gatathctag thttgaaaga tcaaatctc cacctatacc acaacaaaa gcagthaatca  
33481 thttthgat thgttcggat thtaaaatth tatcaagthc tgctthttca acatthtagaa  
33541 thttaccag caaaggcaa atcgctthga aagatctthc thtctctgth thtgagaaac  
33601 cgcccgca atccccttc acaagataaa thtactctc actthgatct thactthgac  
33661 aatcagctaa thtcccaggc aaagthccta cactcaagct thctthttta cgcgthaat  
33721 ctctthgct thttgctgct tctctctc tagctgcat thaaagctth taataatag  
33781 cthttgctc gataggath tctthcaaat atthactaag atattcaaaa cthgctthtg  
33841 aaactatagg acgcacataa gaagagcaa gthttcttht agthttgctc thcaattgag  
33901 gthcaggcac thttacactc actatagcga thagthctc acgcacatca thacctgth  
33961 thtttagagc thtttctcta gcactagcat thgctthct atagthgcta atcactctg  
34021 thaaacctc thtaaatcca gthctatgc thccgcatc aggggthttg atattgtht  
34081 caaaagaaag thagthttcg ctataagth cattataaag thaaagcact thtacatth  
34141 catctcttc atctacgca aaaaatatag gthtagthaa agctthctth thattthaat  
34201 cgtaacaaa thgtgaaath ccactthca aatgaaaact thcacttht cctacagat  
34261 thctthttaa atthtatagth atthttggat thaaatagc aagthcacga aatctthtag  
34321 ccaaatatc ataatcaath tctgthactc caaaatthg atcatcaggc caaathct  
34381 thgtagthc thgtthtttg ctctthctta thaaccaaaa thcactgat actthacct  
34441 ctgaaaatc thggcgataa atthctcat thctthcaac cthagctaca agthttthtag  
34501 aaagthcatt tacgactgaa acgcccacac catgcaaacc cctgaaact thataagth  
34561 cthtatcgaa thttcccct gcathgaaga cagthaaaac aacagthtaag gthggcatat  
34621 thtcagthg thgcatatc acaggaatc cacgacctc atcactaacg atacagctc  
34681 cthcgthag thattctata tctatagth cacaatgthc tgccatthg thcatcagat  
34741 aattatctac tacttcaaa atcatatgat gaagthcgc thattthgth thctctat  
34801 acatactg gcgthttct acagctthc agctthttaa aactthtaata thactcgcac  
34861 cataatthc thgcataath thctthtgth thttgthta agatthttaa thttataaa  
34921 atcataggc thgataacct agataagcct thgaaatth thcagaatth ccacaaaggc thagthtagg  
34981 thatttacac thaaagthga thgtthctct thgathgaag thaaagaaatc aagthtagg  
35041 thtatctthg thattaagath aaatthctca thtactctg thtcgathc aagthcagth  
35101 thtgctthca thattgthta gctthatact thaaagatga thttatctth gthgaaatga  
35161 agthtcatt thtcagthac aactgath thtttaagac thattataaa atctthcagth  
35221 gaaaatthaa gthctthgth gaaagthtt gggataact thtcataatc agggaaatth  
35281 thcathgata gthttgthaa gaatthcaaaa thtatctth thagcgaag catatthtca  
35341 thcataataa thtcgathth ctcaataaaa agthttthgca thtccatgat agctthttta  
35401 ggaatgctga thgtgaaatc thgathatth gctthttca gathataaac thgaaggct

35461 cttgtatcgg ttccaacgaa atttattcta tctgttttta tgtctaaaaa tgcaccattt  
35521 agagaatatt tagggttggt agtatcaatg cttggtagaa tttttttaag agatctactt  
35581 aatcacttg aatcaatc aaattgattt ttgccttctg ttttagggaa atttggaaaa  
35641 tcttcatgat taacatagg aagtttgat tttgtacttt tttgtcttat aaataaaaaa  
35701 ttatctatgg tttctaatac cacttcttca ttgtttaaac tttttatcac atcggctatg  
35761 cttttcgcatt ttgcagtagc aaaacctccg ctttctacac gaatTTTTtct tattttatag  
35821 tttatcccta tttcaaaatc actcgcctcg atgataagtt tatcttcatc agcttcaaaa  
35881 agtaaagtgt aagtgatagt gctagaatct tttttttcta cataggcatt acataaaagt  
35941 accgctgatt caagggtatt tttattgata cttagtttca ttttttctcc ttggctttat  
36001 tataataat ttaaattcat tgtaataata agactattga aattgtgaaa tcttttagca  
36061 aaaaattatt aaatttgtat tttaccatat tttgcttaat tatatttttt cacattttgc  
36121 ttttcttttt ttcacatttt ttcacttaac tttgactttt tgtaagaatt ttgtttttta  
36181 attcttcgat ttttgTTTTt atttgttctg catcttccat gagttctttt atttttttca  
36241 cactatgtga aatagctgtg tgatctttca ttacaaagaa attagcaagt tgtgaaaaag  
36301 taaggcttgt aagctccctt gctaggtaga ttgctatgcg tcttgcagta acgacatttt  
36361 gagttttttt gctagatttc acatcgcttg gcttgatgtt aaattcttta cagatcaaag  
36421 ataaaatc ttctatgctt atattttctt tcttttcttt gatatgatct tcatcacgc  
36481 tttttgcaag ttcaagagtg atttcttgtc cgagtatgtt agcataggca ttttagctta  
36541 tgatgatacc ttctatttct cttatattat cccctaaaga agtggcgata taattgatga  
36601 tatcattaga aagattgata tcgttaaatt cacatttttt gcgtatgata gctatttttg  
36661 tatcgagttg aggcgaggag atatctgcta tgataccatg agcaaaacga ctttttaagc  
36721 gttcggtgat accttttagc atattgggtg gattatcgct tgtcatgatg atttgccgt  
36781 cattgttttt aatctcatta aatataaaga aaaattcttc ttgaattttg tctgtttttc  
36841 ctaaaaattg cacatcatct atgagtaaaa catcacaatt tctatatttt tctgtgaaatt  
36901 tatctaaaga gccatttttt aaatttgaag taaaatcatt gataaaattt tcaactcgtag  
36961 cataaatcac tttttttccc atttccaac ttgcatttcc cacagcttga agcaaatgtg  
37021 ttttgccaag tcctgtaggc ccatagataa agataggatt gtaaagtttt ccaagtttgt  
37081 ctttttgtga gatagcttta caagctccat aagcgtattt gttagaatcc cccactacaa  
37141 aactttcaaa agtaaaagaa ggatttaaaa tctgtctttg tgctttgata tgagcgatat  
37201 cgatttttagt gcttttgcca ctatgctttt ggctttgtgc ttgtatcaag acgcttgctt  
37261 tatttccact ttgcacttca taaaaatgtg aaatTTTTt accatatttt gtttgtatga  
37321 atttggctaa aagctcatta ggagcgttaa agactagaaa atctgctttg ctttgttttt  
37381 cgttaaattt taagatagcg atataatttt cgtattcgtt ttcattgagt tcttttttta  
37441 aattttcaag tatttgattt ggattcataa tctctcttta gtctttgtaa gcttataaat  
37501 tttatcttaa attttataaa aaaaggttaa aatttatttt ttgcatttca ttaaatacaa  
37561 aggaaaaatt tgaaaatttt aggtatagat cctggttcaa gaaattgtgg ttatgctatc  
37621 atagagtcaa ataagggtaa aaatacttta atcgaagcag gacttataaa gatacagcct  
37681 agcactttac aataccaaat cacagagctt tgcgagggtt tggatttgat ttttaaaaac  
37741 cattcttttg atgaggtagc catagaggat atcttttttg cttataatcc aaaaaccgtt  
37801 ttaaaactcg ccaatttctg tggagcccta tccttaaaaa ttcttcaaat tcacggagat  
37861 tttgcagaat acaccccctt acaagtaaaa aaagccgtta caggcaaggc aaaagcgact  
37921 aaagaacaag tagcctttat ggtaaaaaga cttttaggac tgagtaaaga tatcaagcct  
37981 ttagatatca ctgatgcat agcagttgct ttaacgcacg cagcaaattt aagagttagg  
38041 gtatgatttt attacacaaa agcccaaac tccataaatt ctcaaaatac ctttaaat  
38101 tttctatatt tttaaaaaat ttcataaaaa atttctaaag ttggaacaga acttgcttat  
38161 aaactctaca taaacgcaaa aagttttctg aaacttcaag cgtcatttta aaaaagcaat  
38221 attttataaa ggatttataaa tgatgagatc actttggtct ggcgtaagcg gacttcaagc  
38281 acaccaagtt gcaatggatg ttgagggtaa taacatttca aatgttaata ctaacggttt  
38341 taaatattct cgtgcagatt ttggaacaat gttttctcaa accgttaaaa tgcgtactac  
38401 tccaactgat ggaagaggag ggcaaaacc acttcaaatc ggacttggag tttcgggtgag  
38461 ttctacaaca agaattcatt ctcaaggttc ggttcaaac accaatagta atactgatgt  
38521 agcgatcaat ggcgatggct tttttatgggt aagtgatgat ggcggactta caaattatct  
38581 tactcgcgat ggagctttca aactcgatgc ttatggtaac tttgtaata actcaggctt  
38641 tatcgttcaa ggttgaata tcaattggga tgatcaaacc atagacagct caagaagccc

38701 acaaaatatc tttatcgatc caggtatgca tatccctgca gcaaaatcca ctgaagtagc  
38761 tatcaaagca aatttaaata gtggtttaa tataggaact tcaagtagaa atctttatgc  
38821 attggattca gttcatggtt acaataata aactcaaaga gctgaagatg aaaacgatac  
38881 aggaacaact caattttata ccacttctaa aaattctggt gaagttacag aaaaagggtg  
38941 ggatgcaggc tcacttttca atgcaagcgg aacagggctt aatctaagag atggacaagg  
39001 aatttggggt tcttatgcgg atgcaagta ttcgaccaat aaagtaggtg ctagtgtctt  
39061 tgatgcaa atacaagcaa atcaactgc agctttttgg ggaagtgcag atcaaagagt  
39121 aaatttagat ataacttta atgggtgtaa aattcaaat gctgaaattc aaaacataga  
39181 tgatgctatc gcttatatca atacctcac cgctccaacc gacacaagag atggaacagg  
39241 tgtaagagca gttaaaagt cagatggctc gggatagaa tttgtcaatg ataattcaga  
39301 tggcactaca gataatatga aaaatattaa tcttatagtt tcagatgcaa atacagcagg  
39361 ggagctttgg aatgctactt ggaatgcagg tacaagcagt tttacatttg atcaaaataa  
39421 tattaataaa aataataact ctttgtggac agctgataca atggcaccta atccaccaa  
39481 tggcaatgta acattaacag gaacagatag ggtagaagt atcactgctc ataaatatat  
39541 ttatagttca aatcctgtag atataggccc tatgacaaat cctgatggag gccagcatt  
39601 tcaacctggg gctaatgaaa ctacaagacc aaccgatcct gcttcagcag cttattggga  
39661 tgctatgaat ggcggacttt taaataccaa tgcaagaacc tttagaacca cagaggattt  
39721 aagagaactt ttacaaagag atgctagata tgggggtggat tatgatggaa gtggatcttt  
39781 tgcagcagca gatgtcaatc aagctgtaa ggttgtcgt acagctaag gaaattttgc  
39841 ttttctaac gctaaagaag attcatcagt accgcaaat gctataaatg gtgtagctga  
39901 tgctactaca acaactccaa aagcaatgag ttttaatatc actgcttatt ctaataaagc  
39961 tggcacagta agtactaacg atgcttttac agctatcttt aaagcttggg atggctcttt  
40021 aacagtgggt ggttcgatca aagaaagtga gcaacttaag ctttctgctt tttcagcagg  
40081 acttgaaatt tttgactctt taggctctaa acatactta gaagtgcaat ttgtcaagca  
40141 aaataccact caagatgggg gtaatgaatg gcaaatgatc atccgcgttc cagagcctgc  
40201 agagatcaac accacaggcg aaggcccaa taatatcadc gtaggaacag caagatttaa  
40261 caatgatggg tctttggcaa gctatacacc aagaacgatt aatttctcgc caaataacgg  
40321 tgctgcgcca aatcaacaaa tcaagctttc ttttggaa caagtggaagta atgacgggct  
40381 tgtaagctca aattcagctt caactctaac aggacaagca actgatgggt atgcttcagg  
40441 aaacttaaag cctgatgcta tacgcgtaga tgaaaaagga aatcttttag gtgaatttac  
40501 caatggtaaa acctttgcag tagctaaaat cgcaatggct tcagtagcca ataactcagg  
40561 tcttgaagaa ataggtggaa atcttttcaa agttactgca aatagtggtg atatagtagt  
40621 aggcgaagca ggaacagggg gtcgtgggtg gatgaaaacc tcagcgcttg aaatgtcaaa  
40681 tgtggattta agtcgtgctt taacagagct tatcattata caaagagggt atcaagcaaa  
40741 ctcaaaaacc atttcaacaa gcatcaaat gcttcaaac ttaatccagc ttaagcaata  
40801 attatcttaa gctttttaga ttctttataa aatttccgc cttgtgcggg atacaacctt  
40861 gctttacaag cctatcttgg tagccttgta atactagggt gggcttgaac tgccttcaat  
40921 ttattgctaa ctgcctcttt ttaagagtga gttgcaataa aattttaagc aatgtgatat  
40981 aaatttttta aaatttaatt ttatttttat tttttaaaga taaaataatc aataattttt  
41041 tagaaaggag aaaaaatgtc ttatattagt ttttaattaa tgctttcttc tttctgtatg  
41101 cgtgcttggc acgcttaatc tactcgtata tactcatatt ctataaattt acatttccaa  
41161 acaatctagt ttaaagccga taaaaggctt tttagtattt ttttaattaa caaaaaagga  
41221 taaaaaatga attttactaa agaaacttta gcattacacg gagcttataa ttttgacact  
41281 caaagaagta ttagtgtgcc tatatatcaa aacactgcat ataattttga aaatttagat  
41341 caagctgcag cgagatttaa tcttcaagaa cttggcaata tttactcaag gataggtaat  
41401 cctacaagcg atgttttagg acaaagactt gctaatgtcg aggggtggggc ttttgggaatt  
41461 cctgtttcta gtggatggc agcttgtttt tacgcacttg tgaatttggc aagttcgggg  
41521 gataatgtcg cgtattcaaa caaaatttat ggtggaactc aaaccttgat ttctcataca  
41581 cttaaaaatt tcggtataga agctagggaa tttgatatag atgatttggga tagcttagaa  
41641 aaagttatag atcaaaacac aaaagcgatt ttttctgaaa gtctttcaaa tctcaaat  
41701 gccatagctg atatagaaaa aataaccaa atagcaaaaa aacataaaat cgctaccatt  
41761 tgtgataata ccgttgctac tcctttttta ctccaacctt ttaaataatgg ttagatata  
41821 atcgtgcata gtttaagtaa atatgtaagc ggtcaaggca gtgctttagg tggcgcactc  
41881 atagaaagaa aagatttaa tgacttgcct aaaaataacg atagatataa agcttttaac



41941 actcctgatc caagttatca tggactgaat ttaaatacac ttgatttgcc aatTTTTtagc  
42001 attagaatca tcatcacttg gcttagagat ttaggagcta gcttagcgcc tcaaaatgct  
42061 tggttgcttt tacaaggact tgaacttta gcagtgcgta tagaaaaaca cagccaaat  
42121 gctgaaaaag ttgcgaatTT tttaaattct catcctgata tcaagggtgt aaattatcct  
42181 actttaacaa gcaatgctta tcataattta tttaaaaaat atTTtgataa aaattttgct  
42241 agtggacttt taagctttga agctagagat tatgagcatg ctagaagaat ttgtgataaa  
42301 actcaacttt tcttacttgc tgcaaattta ggtgatagta aatctttgat catccatcct  
42361 gcttctacta ctcattcgca actaagcgaa gaagaacttc aaaaagcagg cattaagaaa  
42421 accactgtgc gtttaagcat aggacttgaa aatagcgatg atTTgatagc ggatttaaaa  
42481 caagctatag aaagttaaag agtgtatTTa tgttaagtgg aattatagtt ggtttgTTat  
42541 taggctttgt tttgcaaagg ggacgatttt gcgTTgtagg agcttataga gatgtatTTt  
42601 taagtaaaaa atTTacaatt tttatagcac tttttatcgt cgttgcatg caaagcattg  
42661 gtgTTTgggc tcttatttct ttaggatata tttcgattaa gcctcaagaa ttttattggc  
42721 tttcaacgat tattggtggg attatTTTTg gttttggtat ggtaattgca ggtggctgtg  
42781 ccacaggaac ttggtataga gcaggagagg gcttgatcgg ttctatcgcg gctttattgt  
42841 tttatgcttt tagtgcaagt gctgtaaaat atggagtTct tttgcctttg caggataatt  
42901 taaatacttt taaaatttct gatggaactt tttatcaaag cttgggaatt tctccttggg  
42961 ttttggtgct tgtattgagt ttggttgcg gctTTTTgt gattaaagaa ttacgcaaac  
43021 cgcgcttaa agtcgcaaga ttaaagccta gaaagcaagg aatttcacat atattgTTTg  
43081 aaaaatcgtg gcaccctttt gttacggctg ttttggttgc attgatcgc cttttagctt  
43141 ggctctttc aagcttaagt ggaagaaatt atggTTtagg gattacaact cttcggcaa  
43201 atcttgTaca ataccttagc acaggtgata ttcagTTTgt tgattgggga gtttttttag  
43261 ttcttggaat cgcaactggg tctTTTTtag gtgctaaatt atcaggagaa tttagatttc  
43321 gtcttctga taaaaaac cttagcttatg cgagcatagg aggaattTTa atgggggttg  
43381 gagcttctct tgctggaggc tgtaccatag gtaatggatt agtagaaaca tcactTTTTt  
43441 cgtataaagg ttgggttgc acggtatTTt tcttaatagg tgcttatata gctactTTTTt  
43501 atacaattat attgcctacg cgtaaggcaa cacaaaagat ataaggataa gatatggtaa  
43561 ctttagatac tagaggaaag gtttgtccct ttccactcgt tgaagcaaag aatttggttc  
43621 aaactttaa aagcggTgaa gaattagaaa tctTTTTga ttgtacacaa gctactgaaa  
43681 caatcccaca atgggctgct gaagaagggc atgagatcgt tgattttgaa cttttaggcg  
43741 atgcagaatg gagaataaag cttattaaaa aataaaggag aaaaaatgcc acttattatt  
43801 ccagaaaata taccgctta tgagctTTta aaagagcatg cttttatcat gggatcaagg  
43861 agggcaaaac atcaagatat ccgtccgcag gagattTTta tcatcaatct tatgccaaaa  
43921 aaaattgaaa cagaaaatca aattTTaagc ttacttgcaa attctccttt gcaagtaaat  
43981 atcacacttt tagctactac tagctatgtg ggtaaaaaaca ctccttttac tcatTTggaa  
44041 aaattttaca aaggcttTga agaggTTaaa aaacgcaaat ttgatggtgc tattgtaaca  
44101 ggagctcctg tggaacaaat ggattttgaa aaggTTgctt actgggaaga attgctagaa  
44161 atTTttgatt ttttacagca aaatgtaaca agttctatgt atattgTTg gggTgctatg  
44221 gctgctTTaa aacattTTta tggcgtatag aaaatcgctt tagataagaa aatTTttgga  
44281 atttataagc atgataaagt ttaccggat ttactTTta cgaattTtaga cgaaaaagtt  
44341 ttaatgcctc attcaagaca ttctagtatg gatgaagagc aaatttcagc actacaaaaa  
44401 caaggaaaat tgaaagTTTT gcttagaaat aaaaaattg gttcggcttt gttaaagat  
44461 gaaaagaata tttttatTTt aggccattTg gagtattTTa aagatacttt acaccaagaa  
44521 tatgtaagag ataatttcat acaaaaagct aaaaattatt atgataaaaa aggcaatata  
44581 aaatacaatt ggcgtTcaa tgcaaatact atTTttgcaa attggctcaa ttatgatgtg  
44641 tatcaaagca cacTTTTgt gctttgatga attaatTTct tgtagtaggg gtatcatgat  
44701 atacgcttac tacgcTTTg atatcgctca aaatcgcgca agctgcttca ttggcacttc  
44761 ccatagcgca agctaccatg gtggtaacac ctgaagcaag ccctgctgca taaattcctt  
44821 cttgatcat ttgtcttcca tgatgTTTga aacaaaattt gtttggtttt ggcataagtt  
44881 catgaggtat gacaaagtct tcaagccctt tgatttact tttagttgct cctgTTgcta  
44941 cgatgatata atctgctTTt atacccaaac cttgctcatc actaacgta aaatcgctt  
45001 tttctccact aatgcttact actTTtgaat cgatatatt tacctcaagc atagaagcaa  
45061 tttgtgcttt tatgtgagtg taaatttcat ctgctTTTgc acctTTTgga aaaaaaggaa  
45121 cattataaat tgctgctgct tttaaatccg ctttatcatc atcaaaaaa gtgatatcaa

45181 aatcaagctc atcattttta gctgaagcaa aaaataaagc tgcgctaagt cctgctacac  
45241 tgccacctat aattacaatt gattttttca tttttttcct ttttttaaga tttgtcttat  
45301 tctagtataa aaagctttat ttaatcta atctatattt tttatgtaat ttgctaaaaa  
45361 tttttttttt tcaattgctc taaaagtaat tttttatata atttttaaaa tttttaataa  
45421 ggaaaattca tgcgttatgg tgaaaaagaa attaaagaat ttgatgtaga aaatatggaa  
45481 atttggccta atgatgcgaa gaatgattat attataaaaa tcactttgcc tgaatttatg  
45541 tgttgttgtc cgcgttcggg ttaccctgac tttgcaacga tttatcttga gtatatacct  
45601 gatcaatttg tggttgaact taaagcaata aaactttata tcaatacttt tatgcataga  
45661 aatgtttcac atgaagcaag tatcaatgaa atttacaata ctttaaaaga caaactcaag  
45721 ccaaaatgga ttaaggttgt aggggatttt aatccacgcg gaaatgtaca cacagtgata  
45781 gaatgtcgtg gcgatatggt ggtgccagag tgaatttaa tgatcttgat ttgaacaact  
45841 ggaaaagtgt tgatataaat acagattctt tatggcttat ttctagtcgt gataaaagtg  
45901 gaaagcatag aaatattttat catggtaatt ttataccaca aattccta atcagctcatcc  
45961 gtcgttatac aaaaaaagat gatttaatta tagatccttt tttgggaagt ggaacaacgc  
46021 tctatgaatg tgaaaaatta aatagaaaat gtatagggtt agatattaat gagagtattt  
46081 tggaaatttg attagataat ttcggaataa attttgataa taagcgttat ttttaggaa  
46141 attgtgataa tactgatgcc aaaaaagtgt atgagttttt agaaaatgct ttgaataagc  
46201 ttgaaagtaa aaaagctcag ttttatattt tacatccgcc ttatatggat atagttaaat  
46261 ttagtgagaa aaaagaagac ttaagtcaaa tttcggattt aaaaaattt aaagataaat  
46321 ttttatttac ttgtcaaaat atgttaaaat acttagaaaa aagtcgttat tttgctttag  
46381 tgatagcaga tttatataga aatagcgaat ttgtcccttt gggttttgag cttatgaatt  
46441 tgataaaaca aaattttaaa gttaactaa aaggaattat tgttaaaaa atagaaggaa  
46501 atcgtggaaa attaggtatt aatgccatat ggagatatag agcattaagg agtgattatt  
46561 atatttttaa gcatgagtat atttttgtat ttaaaaagga gtttttagatg gatttagaaa  
46621 tccaaatgga agataaaaga aatttattaa gggcagatag gctcgatatg tcttttggag  
46681 aaattattag caactatgaa gaggataatt taattattca accttcttat caaagatctt  
46741 ttaggtggaa tgattatcaa aaaacaagat ttatcgaatc agttttactc ggtattccca  
46801 ttctcctat tttgttgca gaggataaag ataatggtaa atgggaactt atagatgggc  
46861 ttcagcgtgt ttctactatt ttatcatttt ttggcttttt aaaagaaaat ggaaaaattg  
46921 acgatagatt aaataaattt aaattacttg aaggagaaat tttaacagaa ttaaaagata  
46981 aaaatattga ttctttccct ttaaagttgc agcttactat taaaagattt gttttagag  
47041 ttgaaatttt gcgatgggat acaaattctg agataaaata tcaacttttt agccgtttaa  
47101 atacaggagg ggaagcatta aaagagcaag aaattcgcaa ttgtatttat agaggagacc  
47161 taaatgattt aattaataat ttagcagaaa ataaagattt taaagatgta attggtgcta  
47221 cagaaagaca agaaaaagaa atgtatctta gtgagcttgt tttacgcttt atggcttttt  
47281 attatagaca taatgattta atttttaaaa ctagtggaag tatacaaggt ttcttatcgg  
47341 atttcatgcg ttctaataatg gaaaaaacc aagatgattt ttatcaagtc aagcaagttt  
47401 ttttaaattg aataagttat ttgaatgaaa ataagctttc tgatttattt agagataata  
47461 gggctagaca gtttaatgct aatcattatg atacaataat gtatattttg gcaaaaaatc  
47521 taaatagatt ccaagattca caagaatttc gacaaataat acaaaattta ttaaaaaata  
47581 aggaatatat tgataaatcc ggttcaagta cttatgccac aaaaagaatg caagaaaaaa  
47641 tcaaatttgc agaagaattt ataaaaaatg agtttacaag aaattaatga agaactcttg  
47701 caagagtttc ggtggcgttg cgatgaaatg atattgctga gggatatagt agactcatgt  
47761 gaaaaagatg aatatcagaa atttattttt aagatgagca ttccaataat ctatgcgcat  
47821 ttggaaggat ttattgtttc tgcttgtaaa attgtattgc aatattttaa tactttgaag  
47881 ctttctagta atgattgttc tgaaaaaattt atcatgatgg catttgacaa agatataaaa  
47941 tcactttcag actctcaaca tctagagaaa aagattaaac atttttgtcg tattcaagag  
48001 aagttattat gtcaattnaa atttgagaca aaggttaatg taaagtcaaa ttttaacattt  
48061 gaagttttgg aaaatctttg tttaaaattt gatattagta gtgtaaaatt gaaagactat  
48121 aaagatatac ttgatcaact tgtaaatatt aggaatgcta ttgcacatgg tgaaaattct  
48181 tataatttcc aaaattttgg cgatattgag aagtatatgt atttgtttga ggctttatgt  
48241 ttagattttt atcaagtttt atttaatata cttgaagatg aaaaatataa aaaggagaag  
48301 taaatattga tatacccttt aaagaaggaa cagcaaatta ttatgatttt accataatga  
48361 gtgatttgc atggcattgc acaaaatgtg aattaaaagc agcacaagct aaaacttggc

48421 aaacttggag acatcaaggt attcagctag atactgatga aaaaggggaat ttttacaaaa  
48481 tgcaattatg ctgtaaagt aatatgaata ccgttcatag aaaactaaaa agcttagaaa  
48541 ttttggaga tactaagaca agaagcggta tctctgttag ttttagctaga agaattaaga  
48601 attgtcttag aatgaagaa gctatztatc taagagaaat gtctcctaata gaattggaaa  
48661 ttgatcataa atttccacag attagatgga aaacagatga gagtaaaaaat gatggttcta  
48721 tgagtgaaga agaaataaaa aataaattta tattattaac tagaagtaat aatttattaa  
48781 aatcgcgtta ttgcgaaaaa tgttttaaaa atggcactag aggatatttt cctgggatta  
48841 aattttggta taaaggtaat gaaaaatggc aaggtgaaga tgataacgat gaaaaagggt  
48901 gcgaaggctg tttttggat gatccatata aatggagaga agaattaaat agaatttcgc  
48961 aaatacaaat aatctatga attatattgg gtcaaaattc aagctttcat cttttttatt  
49021 taaaagtatt gatgagactt taaaagcaaa aaataaagca ctagaagact gtatattttg  
49081 tgatattttt gcaggaacat cagcagtagg aaagcttttt aagacaaaag taaaacaagt  
49141 cattgctaata gataaggaat tttatagttt tattttggcg aaaaactata taaaaaactc  
49201 aaatttatta acgcgtgcta atgaacttat agatatttta aactatcaaa tccctttaat  
49261 aaagaataaaa atttacaaat attatgcaat aggtggtgga gaaaataggc agtatttttag  
49321 tgatcttaata gcaatgaaaa ttgatagcat aagagtacaa attgaaattt ggaaagaaca  
49381 aaattttata aataaagaag aatattattt tttgttgga agcttacttg aaagtgcaga  
49441 taaagtggca aatactgctt ctgtttatgg ggctttttta aaacatctta aaaaatcagc  
49501 acaaaaaaaaa atgggtgttat ttcctgcaga atttcagcaa tcacataata aacatcaagt  
49561 ttttaataaaa aatgcaaatg aattgataag agagattaaa ggtgatatac tttatcttga  
49621 tccaccgat aataacagag aatatggtgc aaactatcat gtattaaata ctattgcaat  
49681 atatgatgat tttattcctc aaggcaagac agggcttaga gcttatgaaa aatctgcttg  
49741 gtgtaagaaa aatttggttt ttaatgcttt ggaagatttg attaaaaatg ccaattttaa  
49801 gtttattttt ttaagttata atgacgaagg gttgctttct ttagaacaaa tcaaacaaat  
49861 ctttaaaaaa tatggaaaat atgatttaaa aaaccaaatt tataagcgtt tcaaggctga  
49921 ttcttctcga atttgcaaac aagatcaaac catagaatac ttacatatct tagaaaaaaa  
49981 atgaaaaagt acaaaaaata atactatatt aattatcaat ataataat gcgttttgca  
50041 aatccaattt aaaggaaaga ttatgaataa aaagctttta agtataattg cgggtgttgc  
50101 gttattttca agttcagctt tagctgcgga agaactcaggt ttttttatag gtgcggatgc  
50161 agcttatggt caaactaaag ttaaaggaga tttaaaacat aataaaaccg gtgctgtttt  
50221 taatggtgat ttatctagta gcattcctat tttaggttta agaatgggtt atcgttttaa  
50281 tgatttacat agattgtatg ctgcttataa ttactctgat gaattcagtg atattataag  
50341 aactcctaata cttagaatag aggggtgattt taacacacat aaattcttat taggttatga  
50401 ttttactcca gaaattttta aaagagtaag agctgttgcg ggtggatatt taggctatgc  
50461 aaaaacgagt ctgattttaa aaacatcttt attgtcttta tctcaagatt ttgatggttt  
50521 tgtttacgga gcaaaaatag gtgctatatt tgaattaggt acttctaata agctcgaagt  
50581 aggttttaaa gcagaacaaa tcgaatacaa tactagaaat tattaccaag agaccatagg  
50641 atcgaatttt tatgatccaa gacaaacaaa ttatggctta ttttaggtt atacttaca  
50701 attttaatga agtattttat cggttaggac tcaacccca ccgataaaa atctttctac  
50761 atcatctaac aatttttcac aaatttgaga atcggtattt ttatccacta caaggttgat  
50821 ataagttcta gtatctctaa aacttcctgc tgattttgaa ttgtcgcgtg ttaattttg  
50881 attttcttta gtgtattcta tgggtgatgtt aaatttaata gctgaacttg cttctcctag  
50941 attggttttt attaaaacat tcattttcga agcttttagag agagtagctt gggttttaga  
51001 tatgatttct ttaaactctt gacaagagcg gatgagtgtc gcaatgaatg tattatcaag  
51061 tccttcataa gctactttta gtttattttt gatgtctttt gtactttctt tttcaggagc  
51121 acaaaaaacc atgtaaaaac ctgttttgat tggaaacatta tccgttttta catcacgcc  
51181 acttgacata actttaacat aaattgcatt atcaagatag acacgatcca ccataggacc  
51241 gtaaatttcg tactcttttc tacgaactat tacttcacga gctaatacat ttaattttac  
51301 attagcttca tggataacag gctccatttc tttttgatc tctaaaagct cttttaacat  
51361 caacatcctt tttgttactt aaaattacaa ttataacaat aaatttctta atttgtaaat  
51421 ttttattttg tgtattaact aaaaatatgc taaattcaaa actatataat tttatgaagg  
51481 aggcgacaat gacacaggtt tttaaaaatt caattcaagt caaagagcaa aaaaataaag  
51541 aaaatcactt taacctgatg ctgcaactct cactcaccct aaactaaaa ttttattttt  
51601 aatcattttc taaaattttt attttactat tgtttttaag tttttgaatt ttttaataaaa

51661 ttcattcagt ttatttcatt ttttaaggat taaaatatga agaataataa aattatcatc  
51721 tttgatacaa ctttacgca tggatgaaca gccttaggca gttctttaa tataaatcaa  
51781 aaattacaaa ttgccttagc gcttgaaaat ttaggtgttg atgtgataga agcaggtttt  
51841 cctgtatctt cacaaggaga ttttgaagca gtaaaaaaca tagcctcaaa agtaaaaaat  
51901 tcaaccattt gtgcgctttc tagagcttta gataaagata tagatacagc ttatgaggct  
51961 ttaaaagtgg cggattcttt tagaattcat acttttatag ccacttcgac tttgcatata  
52021 caagataaat taaaaaaga ttttgatgaa attttgcta tggcacaag agcgatcgca  
52081 agagctagaa actatactga tgatgtgaa ttttcgtgc aggatgcagg aagaactcct  
52141 attgataatc tttgttttat ggtagaaaat gctatcaaag caggggctag aactatcaat  
52201 atacctgata ctgtgggtta taccttacct agtgaatttg ctaatatcat caaaatttta  
52261 ttttaacaaag tgccaaatat agacaaagct gtcatttctg tgcattgtca caatgactta  
52321 ggtatggcaa caggcaatag ctttaagtgc attttacaag gcgcaagaca aatagaatgt  
52381 accatgaatg gacttggcga aagggtgga aattgtgctt tagaagaagt tgtaatggcg  
52441 ataaaaaca gaagcgatta tttaaaaggt ttttatacag atatcaagt cgaaaatatt  
52501 tctaaaactt caaaattagt ttcagccatc actaatgaaa gtatacctt gcataaagcc  
52561 atagtaggaa gtaacgcttt ttctcatagt tctggaattc atcaagatgg agtgcttaaa  
52621 aatagacaaa cttatgaaat tataagccct agcagtatag gacttcatga aaatcgtatg  
52681 cttatgactg caagaagcgg tagggctatg attaaaactt gtcttgataa tttaggatat  
52741 gatgaaaaaa cttataatth agacgaagtt tatgagagtt ttttacgcct tgcggataaa  
52801 aaaggacagg tttatgatta tgacttagag gctttaatgt ttttaagtta tgaaatgat  
52861 gaagagaatg aattagtact tgaaaaatta agtghtaatca gtggcactat cccaacagct  
52921 tgtgtttgtg tgcgtataaa agaagagttt aaaactgaag cttgtaccgg aaatgggcct  
52981 atagaagcgg tgtttaattg catctctaga atcacaggct taaaccctgt tttaaaagca  
53041 tatagcatta atgcaaaaag ttcaggtgtg gatgcacaag ggcaagtgga tgtggattta  
53101 gaatttaaag ggagaaaatt ccatggtaaa gggctttcaa cagatgttat agaagcatca  
53161 gcacaagcct ttatcagtc ttacaatgca atttatcgat ctttaaaagt tgaagaaagg  
53221 aaagcagtat gaatacttat aaaatagcag ttttgccagg agatggcata gggccttcag  
53281 tgatgaaaga ggctttaaaa attttaaat ttgttgcca aaaacacggc tttaaattag  
53341 aaacaaaaga agcaaagata ggtggggcaa gtatagatgc atatggggta gcattaagcg  
53401 atgagacttt aaagctttgt gagcaaagt atgctattht gtttggttca gtaggagggc  
53461 ctaagtggga taatthacc atagatcaaa gacctgaaag agcttcgctt ttacctttaa  
53521 gaaagcattt taatthattt gcaaatttgc gtccttgtaa aatthattgaa agcttaagac  
53581 atgcttcgcc cttaaaagat gaaattatcc aaaaaggtgt agatatctta tgtgttagag  
53641 agcttacagg tgggatttat tttggtaac aagaattagg caaagaaagt gcttatgata  
53701 ctgaaattta cactaaagca gagatagaaa ggatcacacg ccttgctttt gaaagtgcaa  
53761 gaataagaaa taaaaaagt catctaactg acaaagcaaa tgttttagca agttctattt  
53821 tatggcgtga ttagtagga caaattgcaa aagaatacga agatatcaag ctagaataca  
53881 tgtatgtaga taatgcagct atgcaaatta ttaaaaatcc tagcactttt gatgtaatgc  
53941 tttgttctaa tctttttggc gatattthaa gtgatgaatt agcagctata agcggatctt  
54001 tgggcttgct ttgttctgcg agtttaaat ataaaggtht tgggctttat gagccagcag  
54061 gtggttcagc tcctgatata gctcattthaa atatagccaa tcctatagcc caaattthaa  
54121 gtgctgcttt gatgtthaaa tatagththt aagaagaaa agctgcacaa gatatagaaa  
54181 atgcatagc catagcttht gagcgtggaa aatgactaa ggattthaat gcgaattctt  
54241 atttaagcac cgatgaaat ggggattgta tagtagaaat tthaaaggag aataacaatg  
54301 gctaaaactt tatatgaaa agtatttgat tctcatgtgg tttatcaaaa ggaaaatgaa  
54361 ctccctatac tttatatcga tagacattth atccacgaag taacaagccc tcaagctttt  
54421 tcaggtctta aatggcaaa tcgtaaaatg gcaagatcgg attthacttt agcgactatt  
54481 gatcatgat tatcgactaa aagcacagat ttggatgctt gttcaggat ggcaaaagag  
54541 cagattacga ctttgatgca aaatactaaa gaatttgag tcaggctttt aggcttaggc  
54601 gataaaaatc aaggtatagt gcatatagta agtcctgagc ttggttttac cttaccaggt  
54661 gtaactttgg tttgtgggga ttctcacact gcaacacatg gggcttttgg agctttggct  
54721 tttggtatag gtacaagtga ggtcgagcat gtaatggcta cgcaacttt aaaacaagca  
54781 aagctcaaaa ccatgaaaat agaatgcaag ggtcagtht aaaagggtgt ttatgctaag  
54841 gatttgattt tatactttat agcaaaaat ggcaccgcaa aaggcacagg ctatgccata

54901 gaatthttgtg gagagttgat agaaagcttg agtatggaag ctagaatgac gctthtgcaat  
54961 atggctatag aatthtggcgc aaaagtcggg atgatagctc ctgatgagat tactthttgaa  
55021 tatataaaaag ggaaagaatt tgctccaaag ggagaagaat ttgaaaagca ttgtgagtat  
55081 tggagaagtt taaaaagcga tgagggcgcg caatatgatg aaagcatagt ccttgatgta  
55141 agccaaattc aaccacaaat cagctatgga actaatcctt ctcaagttat tgctataaat  
55201 gaaagaattc caaaagtcag tgatthttagc aatccaagcg atcaaaaatc cttactcgat  
55261 gccttagatt atgtgaattt agagcaagat caaagcttag aaggggtaaa aatcgatatt  
55321 gthttcatag gttcttgtag aaatgggcgt ttagaagatc ttaagatagc tgcggatatt  
55381 ttaaaagggc gtaaaattca taaggatgth aaagctthta tcgtacctgg thctatgcaa  
55441 gtgagaaaag aagctgaaaa thtaggactt gataaaattt tcattgaagc aggggtgcgag  
55501 tggagatatg caggatgthc aatgtgtctt ggtatgaatg atgataaagc aagcgcggga  
55561 caaagagtcg thtcaacttc aatcgtaat thtgtaggca gacagggtaa gggthtctatc  
55621 acccacttaa tgagtcctgc aagcgcagca gcctgtgcca tagaaggctt tathttgtgat  
55681 aatagaaaat thttaggagt thaaaatgca aaaatthact actcataaag gtatagcttg  
55741 tcctthtagaa tatgccaata tcgacacaga tcaaatcatc cctaagcaat thttacttgc  
55801 tgthtcaaag cagggctthg gtaagcattt gthtcatgat ttgcgthatt tagacgataa  
55861 agaaagcgtt thaaatatgg aththtaatc caataaaaa gaataccaaa acgcttctat  
55921 thtagtaagt thtgaaaatt thggaagcgg thcttcaagg gagcacgcac cthgggctth  
55981 ggtggattat ggtataagag ctattatcgc gccttcttht gcagatattt thaaaaataa  
56041 tgctthtagga aatggthtgc thactataga gcttgctaaa gatgaggttg taagcattat  
56101 aaagcaactg aaagaatctg aagataaaaa tatagaaatt thctthattg agaaaaaggt  
56161 gthththtaaa gatcaagtht thtctthtga thtgatgaa thtctgtagaa cctgthtgc  
56221 agaagggctt gataatatag cthtaactth aaaatatgaa gaacaaatca aggcttatga  
56281 gaaaaactca aaaagcttht tggtthtagga thththcata agctaaaaac thcatcttcat  
56341 agcaagggat atgaaaagcc ccgcaaaact caaaatthta cthththaaag agcgaattca  
56401 tagggatatt thtactatga gtatccgctc thtaagctata ththcttca ththtagcat  
56461 aagthtcaaa aaaatthtaa agctthtgtg ctacgcctth gcctthtagca ththctthta  
56521 cagccaaacg gtgcagataa aaagcttgat tatcgttagga ththththaaag thgatttgct  
56581 cgtaaaattc gggthtcaat ththctattga tgcaaaataa acctagaatt thcatcttht  
56641 cthtacaag ataaagctct tgtgthtthga thctthctth aaaaatthct thcattaggat  
56701 aatthtcatc ccattgatta aaatthcatag cthtcatgga atthtagagcg thctthtgcta  
56761 tgthtaagtat tgatththaa thctthtthtg tagctththc tataacgaaa thctthcataa  
56821 aaaatcttht ththataaat gtaaaattag thgthtgatt thaatatctth ggthaagthtth  
56881 aaagaatcct atthggthtth aaaaatccca aaaagaacc thaatthatta aaaatcatta  
56941 taacacaaaa gcaacaaatt gaaatcaaaa atctthtagt thgthtthgat atagcgcctth  
57001 taaggtatth thtgaaagct gaagaaattc aaagaaataa aaaatggthg thccgattgg  
57061 actthgaacca acgaccacta ccatgtcaag gtagtgctct accaactgag thacggaacc  
57121 atggthggagc atagcgggth cgaaccgctg accccaacgc thccagcgtt gthctctccc  
57181 agctgagcta atgcccctta gagthtthgtt aaaatthctag cgcaatatta cththththtg  
57241 gctgaaaacc aaagththaa thcacgattta gaagcaaaga actataagaa ththtaagacat  
57301 gaagataaga atcggtthaa agaaththaa ctatthgatt aatthctaaa ththctctthc  
57361 gcattcatct thgtthaaagt cgagthtggcc agaathgtaa aathatthtag thcaaaactaa  
57421 aatccctata thaaatthct ththctthatc thacgaatthc thgatathatt gatgagcatt  
57481 atthataaatt thtagcgcath cththtggatg gthgtthaaa ththctgatta ccgtagctag  
57541 gthtatcgth thcaaththaa caaatgata atthtggthtth aaagthctct ccatgaaacca  
57601 agthtthcga gththththtth gggcthaagc thaaagaattg gaathctattg cccathththaa  
57661 atthgctthgct acatcgthtgc cthcthaaaga gaththataat ththaththca ththgtthctc  
57721 thtactthaaa aagthththth thcattgact caathtgcct gaagthtctc thhaagthcga  
57781 aathggtth thaaataag aathgaaaaa thctththct thgtththgat athacagcgc  
57841 ththaaaaatt gctatgthtth ththaththc athaaththata thgtctthth aaaaacaaaa  
57901 atgcctatth thtatcaagth ththataaath atthgtthgca ththctctca gaggtctthga  
57961 ththacaaatg gthtggctct thaaaagtata thththataca ccaaththth ththctcataa  
58021 aaaatcattg ththaaagtatt thgcthaatthc athaagcathca aaagcathaag aggtaththth  
58081 aaaaggaath ththctatth ththctththc thgtthaatgta aaaaathcat thththgatt

58141 gtaataactta acccgagttt gtatttcttc taattctttg acattgtatt ttaaaatfff  
58201 attgaaaatt ttatgtaaat ttgtttgaaa aaaatatctt gatataaaaag atattccaat  
58261 gccttttaaa ttcataaata atcttgattg taacattatg agatccataa ataaagaatt  
58321 tataatattt taccaaaaat attaagtatt attaagcagt taagaaatff taataaaaata  
58381 ataataatff atattaaatt taataatggc agacaggaag ggattcgaac cctcgaaagc  
58441 ttgcacttta cacgcgttcc aggcgtgctc cttcaaccgc tcggacacct gtctaattaa  
58501 aaattaaatt atatctaaaa aagctttaaa taaaatffta gtaaaaaaga gtataattac  
58561 atfftcattt tgtaaaatga tctttaaaga tttattatgt cagggtagct cagctggffa  
58621 gagcgtgggt ctcataagcc ggaggtcggg agttcaagtc tcccccttga caccatttcc  
58681 aaaacttctt ttagaaaaat cctcaaaaat tataaatfff agctcaatgg tfftaaatct  
58741 atgaatttgt tttagaatff aatctctatt ctaaattffa gcatttaaat ttgtgtatct  
58801 tttatatggc ttgaaaaata aaatttgttc gaagagatgg tfftttgaga taaggtatat  
58861 tttataaaaag ataggaatff gattattgta tfftaaatga taatgfftaa aaatffatct  
58921 cgaaataatc aaaaaataa tcaaattffa agacacaagg ggaatffgtt attagaaaat  
58981 taacttaaaa tagactfftg ataagagtat agtatcataa aattataatt tgattgatat  
59041 ttaaatffat caaagcgcac atcgtffttat ttataaatff aaatatctta aaatffcaat  
59101 aagagattta ttcaattagc gattgctfff atctfftaga atcacccaa tcataccac  
59161 aaaacctatc aaaacaacga caaatataa aatgatttga aaaatatcta aagctgtcat  
59221 aattctfftg ccctffctff gagttgtcca caagctgctg aaatatcaag tcccttgctt  
59281 tctcttatgg tgcaagttac tcctfftagc cttataaat cttgaaatff gattgcattt  
59341 tcaagtttag gacgatgata aatgctacc tcgtgaggat tgaaaagtat caaatffact  
59401 ttggctffta taccatffta aagcttgaca agttctfftg catgttcaag tffgtcgttg  
59461 atgccatcga tgagtaaata ttcaaactt actctffttc tffgatctat agggaaagcg  
59521 cgcacagcat ccataatcgc agctatatta taagctffat ttataggcat gaggffcggff  
59581 cggagttcgt cattgactgc gtgaagggag atagcaagta aaacgccaa atffcatffcg  
59641 cctagttctt tgatttgtff tgctaagccg ctagtactta tggffttgtct gcgaggactg  
59701 atagcaagtc catcatfftg agagagaatt ttaaccgcct tggaaactt tffaagattg  
59761 tcaagaggff ctcccatacc catatagact atattgacac gacgctcata ggggatatta  
59821 tfftgffttt tgatccataa aatffgtccg actatctct cgcgctcaa atffctfftt  
59881 aagcctcctt tggcggtaag acaaaaacta cagccactff tacagcctac ttgagaggaa  
59941 acgcaaatgg tatatcttgt atgtgaaatt cffttactt catcgtcaaa tffttcttct  
60001 ttcataggca aaagtactt ttctatcctt aagccatcga taagttcaaa aagatatttg  
60061 atacttccat cfftgctffg ttcatffffa acgcatffta gaggagcga atggtaaagt  
60121 tgcgcaagtt ctaaacgcaa atctffttgg agacttgaca tatcggaaaa atffatttgca  
60181 tffttffgat atatccattg ataaatffgt ttcacgcgaa acataggctt gattffttct  
60241 tccaatffct caggtaaaa gtctaagata ttaatgagff cffcaagat tgcctffctt  
60301 tgattgctaa atataatgat taatffttta atattcttct agffttffctt tfgcctfftg  
60361 atgattfftt ataaaactt catgagcatt ttcattgcaa aaattagtcg cacataaaat  
60421 acattctgca tctatatcta aatfftttag cagctffaa actgaaaaag cffccatgff  
60481 ttcagcaaaa aaacctagff ttgcaaattc tfftgctgct tgtgaaatff gacaaatata  
60541 attagaagaa ttgactffga ttgtffcac agaaactff tgattgttga gffttgattc  
60601 aatgfftgca ggaggttaga atffgatcaga aatataagaa aatffcaat tfgcaagcatg  
60661 agagctffta taaatffcta gaatffctc tffatcgtaa agtccacatg tffctataaa  
60721 tacaagfftt gaaggtfftt cffttaaaca aagctgtgff aatgaaagg tffgattctat  
60781 caagcctata cctatggctt tggcaaaaaga aaaatfftca tffccacctg cgcaactat  
60841 catffacaat atcctaaaa taatfftagca agaatfftag ctaaaaaggc ttaaaatffa  
60901 gaatfftttag ctaaaataa aaactattat gatgaaagca aaaaaactt acggacaaaa  
60961 tfftttaaac gataaaagta tffttatcaa aatcatccaa gccatacca aagatactga  
61021 aatatagta gagattgggc ctggcttagg tgatttgacg caagagctff taaaagfftc  
61081 tcatgtaaag gcttatgaga tagatgatga tcttatacct atffttgcgta agaaatffca  
61141 aaaagaactt gaatgtggaa aatffaaatff gcttcatcaa gatgcaagta aactffcata  
61201 tfftgatgaa aagaagtatt tfftggtcgc taatffgcct tactatgffg caagccatff  
61261 gattfftgca gccttagaag acaaaaatff ctcggtfftg atffgtaatgg tffcaaaaaga  
61321 aatggcattg aaatffctgt ctcatagcgg agaaagtgat tfftcagctc taggagfftt

61381 aagcgctatg atttgtgagc gagaaatact atttgatgta gaacctgaat gttttaatcc  
61441 gccgcaaaa gtagtatcag cagtaatgaa aatgattaaa ttcagagctt atcaggatat  
61501 ctgtgaaatt catgctttta aagctttttt aaaagattgt tttaaagcac caagaaagca  
61561 actattaggg aatttaaaaa attataaagc tgaattagcg gaggtttttc aagagttaaa  
61621 actcaattta aatttacgcc cacatgaact ttgcgtcgat tcatacctta aaatttacga  
61681 aaaagtaaag gaagaatatg aacgaaaaca acaaaggaaa tagtgaaaac acaaacattc  
61741 ctaactcaaa ttcaaaaaac aacaagcgct ataaatacag aaatcgtaga aaaaaattag  
61801 ccgattctat cagtgaaaat tctcaaaatt caactcatga attttctaac aacgaaaaga  
61861 taaataccaa gaaaaattct acaaataccc aacctttaga gagtgaaaat atagaaaaac  
61921 caagcgaaaa aaagaaaaaa agaaatcgca atctcccttc taagctcact ggaaatgaag  
61981 attggcaaat cgcgcttgca gagtgtatag aagcaaaccg tgtttcacat gaaaatcgct  
62041 tacatccttt aaaatacaat aattctagcg agcataaaat tcgcatcact ccactaggcg  
62101 gcttagggga aatcgggtgga aatatcagtg tttttgaaac caataatgat gcgattatca  
62161 tcgatatcgg tatgagcttt ccagatggaa ctatgcacgg ggtggatatac atcatccctg  
62221 attttgatta tgtaagaaag attaaagata agattcgtgg tatagttatc actcatgcac  
62281 atgaagatca tatcgggtcg gtgccttact tctttaaaga atttcaattc cctatttatg  
62341 ctacgccttt agctttggga atgatttcaa ataaatttga agagcatggc ttaaaagctg  
62401 aacgaaaatg gtttcgtcct gtagaaaaac gcaaagttaa tgagatcggg gaatttgata  
62461 tagagtggat acacatcaca cactccatca tcgatgcttc tgctttagct atcaaaacta  
62521 aagcagggac tatcatccat acaggagatt ttaagatcga tcaaactcca atcgatgggtt  
62581 atccaacaga tttggggcgt ttagcgcatt atggcgaaga aggagttttg tgtcttttaa  
62641 gcgatagtac taattcatal aaagaaggct atacgaaaag cgaaagtctt gtaggaccga  
62701 cttttgatca aatttttgca cgcactaagg gtaggggtgat catgagtact tttagctcaa  
62761 acatccaccg tgtttatcaa gctattactt atggtttaa atacggcaga aaagtttggtg  
62821 ttattggctg ttctatggag agaaatcttt ataccactat ggaattaggt tatattaaac  
62881 tcgatagaaa aattttcatt gatgcagatg aggttagtaa gtataaagac aatgaagtgc  
62941 ttatcgtaac cacaggaagt caaggtgaaa ctatgagtgc gctttataga atggcaaccg  
63001 atgagcataa atttataaaa ataaaaccaa gcgatcaaat catcatttca gctaaagcta  
63061 tcccaggcaa tgaagcgagt gtttcagcgg tgcttgatta tcttctaaaa gcgggtgcta  
63121 aagtagcgta tcaagaatth agcgaatth atgtaagcgg gcatgcaagt atagaagagc  
63181 aaaaattaat gcttactcta gttaaagccta aattcttctt gccagtacat ggagaatata  
63241 atcatatcaa taaacacaaa gaaacagcta taaaatgcgg aattcctgaa aaaaatattt  
63301 atcttatgag cgatggcgat caagtagagc tttgtcaaaa atatatcaaa cgcgtgaaaa  
63361 cagttaaaac aggcaagggt tttgtggata atcaaatcaa taaacaaatc gctgatgatg  
63421 tggttaattga tcgtcaaaaa cttgcagata gtggtatagt tgtcattatc gcacagcttg  
63481 ataaagcaag taaaacattg attaataagc caagagtatt tagctatgga cttgtagcag  
63541 ataagcaaga tcatgctttt tctaaagaaa tggcagaggt tttaggacaa tttttgtca  
63601 atgttaaaga tgaagtactt aatgatcaa gatttttgga aaatcaaatt cgccaagtat  
63661 tgagaaaaca tatttttaga aagattaaaa aatatccaac catagttcca actattttg  
63721 taatgtaaaa tggggcgttt ttcgccctta aattttcaaa ggaaatcaaa tgagaatcaa  
63781 taaattcata tcgcataata gcccttattc acgcccgaa gctgatgagc ttattaagca  
63841 aggtttggta aaaataaaca acaaaatagc ctttttaagc gatgaagtaa agacaaatga  
63901 taaagtcttt gttaagggtgta aggctttgcg taaaaaacg caatttagcg tgattattta  
63961 tcacaagcaa aagggtgaaa ttgtagcaa aagagatgat cgcggaagaa aaactatcta  
64021 tgataccctg ccaaagcagt ttaatacttg gctaagtgtg ggaaggcttg actttgctag  
64081 tgaaggtttg cttttgctta cagattctcc tgtgatcgct catgctttga tgaatagtga  
64141 tttagaaaga gaatattatc tcaaaactcaa aggtgtgatc aataagcaag ttatagaagc  
64201 gatgcaaaat ggactagaaa ttaaaaatga aaaaaaggc gcacacgcaa aaacaaagat  
64261 tacttctatg agttttgctc cttttttgga ttttgaaatt tttggaacaa gtggcggata  
64321 tacaagacta agagtgatta taaatgaggg taaaaataga gagcttagac gtttttttg  
64381 gcattttgac ttagaagtaa tggatcttaa acgcgttgct tttggcgct tagatcttgg  
64441 aatgctaaaa gcaggaaaac atcgctatct tgaaaatggc gaatatgaaa aattaagaga  
64501 ttttttaaaa gtcaataata tatattatta attatacttt tatgtatgat tttatttaaa  
64561 tacattatta aaaattatag ggttgaaatt caaatataaa taccaactag tagtttttaa

64621 atttaatttc catttcataa tcaaaatata attatcatcc ttttaaaaag gaaaataatt  
64681 atatTTTTTTT aaaatttcct tgacatttaa aagccgaatt tactatactc acatttctat  
64741 ttttggtttag ttttaacta acgagttctt ttaaaaggaa aatttatgga aagaatcagg  
64801 cttaagctaa aagcttatga ccatcgagta ctagacagaa cagttgcagc aattgtagaa  
64861 gctgtcaaaa gaacaggtgc ggatatcaga ggtccgatac caatgcctac taaaatcaaa  
64921 cgctatacag ttttaaaatc tccacatatt aacaaagatt ctctgtgagca gtttgagata  
64981 agaattcacg cgcgtatgct agatatagta gcagcgactc cagatacagt tgattcttta  
65041 actaagcttg attttagcgc agaagttagc gttgaagtaa gagctatggg taaataagga  
65101 taaaatatgg aatatattgt agaaaaata ggaaatgagta gaacaattgc taatccaagt  
65161 atcgctgtca ctttactaag agttgtgaat gcaaaaagtat gtgaagttga taatggtaaa  
65221 gctatcgttg catactcaaa aggaaaagta aacaataaat gtgttgcagg acaacaaaaa  
65281 aatatataatc tttctgcaga atttaacaga tttgcgactt tagaagtagc aaacactgaa  
65341 gcaggagatt tagatgaaac tccattaaat gaagcaaaag ttttaaaagt aagcttcaat  
65401 accaaaggta gaggttatag cgggtttatg aaaagacata acttcgcagg ggggtccagca  
65461 agccacgggt caagatttca tagacgccat ggatctatcg gtaatagaga atggccagggt  
65521 cgcgttcaac caggtatgaa aatggcagga cattatggaa atactaaagt aactgttaaa  
65581 aacgaagttg tatcttatga tgctgaaaac aaaatttttag tagttaaggg tgcagttcca  
65641 gggtataacg gtgctatggg taaaataagg attgcaaaat gagtaaagta gttgttttaa  
65701 atgataaatt agaaaaagca ggcaacttg aattacctgc aaaatatgca gaagtaaactc  
65761 cacacaatct ttatttatat gtaaaatctt atctcgcaag ccttagagca aatacagctc  
65821 aactaaagg tagaagtgat gtaagcggtg gtggtaaaaa acctgggaga caaaaaggctc  
65881 gtggtggcgc tagagcgggt tctactagaa cgaatgtttg ggtaggcgggt gcggttgctt  
65941 ttggccaac aaatgaaaga aattattatc aaaaagtaaa taaaagcaa aaaagattag  
66001 cgcttgaaag agcttttagct gataaagcag ctaagggtgc actttttaca gcagattctt  
66061 tagctattga aagcggtaaa accaaagatg caaatgcagt gattaaaaaa cttgggtgta  
66121 aagatgcttt gattgttaaa gatttactag atgaaaaaac acttctagct tatagaaatt  
66181 tagcaaactg ttatgtagtt gatataagcg aagttaatgc ttatttgata tccgtattta  
66241 atgctgtaat cattgaaaaa tcagcgttag aatctattac aaaagaggga taattatggc  
66301 agatattact gatattaaaa caatacttta tactgaaaaa agtttaaatt tacaagaaca  
66361 aggtgtcgta gttatccaaa cttcaccaa aatgactaaa acaggcttaa aagcagtttt  
66421 aaaagaatat tttgggtgtaa ctccacaaag catcaattct ttaagaatgg atggaaaagt  
66481 aaaacgcttt agaggtcgtt tgggacaaaag aaatgactat aaaaaattct atgttaagct  
66541 accagaaggt gttagcttag aaagtatgga ggcttaagat ggcaattaaa acttataaac  
66601 catatactcc aagtagaaga tatattacag gtttaagttc tgaagatatt acagcaaaac  
66661 caagtgtacg ctctttactt gtgaaacttc cagcacacgc aggacgtaat agctacggaa  
66721 gaattacaag ccgtcataaa gaagcaggag ctaaaaaact ttacagaatt atcgatttta  
66781 aacgccgcaa atttggcata gaaggaaaag tagaagcgat cgaatacgat ccatatagaa  
66841 attgtagaat tgctttgatt tcttacaaaag atggtgaaaa aagatatatt cttcaaccac  
66901 gcggactaag tgttgggtgat attgttgacg ctgctgaaag cggacttgat ataaaaccag  
66961 gtaatgcaat gaaacttaaa aacattcctg tgggtactat tgttcataat gttgagttaa  
67021 agccaggcaa aggtggtcaa atgatccgct cagcaggagc ttatgcgcaa cttatgggta  
67081 aagaagaaaa atatgttatc ttaagacttg caagcgggtga aatgagacaa gttctagctg  
67141 aatgtatggc aagtataggt gaagttaggt acgaagaatg ggcaaatgtg actatcggtg  
67201 aagcaggtag aaatcgccac agaggtattc gcccaaaac tcgtggttct gcaatgaacc  
67261 cagtagatca cccgcacggg ggggggtgaag gtaagaaaaa ctcaggccgt catccagtaa  
67321 ctccatgggg taaaccaacc aaaggtgcga aaacgcgtcg taaaaaagct agcgataagc  
67381 taataatttc aagaagaaaa ggaaagtaag atggctagat cactaaaaaa aggtcctttt  
67441 gttgatgac atgtaatgaa aaaagtcacg gctgctaaaa aggctaataa taataaacct  
67501 attaaaactt ggtctagaag aagtactatc attcctgata tgataggttt aactttcaat  
67561 gttcacaatg gcaaaaagttt tattcccggt tatatcactg aaaatcatat cggttataaa  
67621 cttggagaat ttgctccaac acgcacattt aaaggccata aaggttctgt gcaaaaagaaa  
67681 attggtaagt aagggataag atatgagtaa agcattaatt aaattcataa gattatctcc  
67741 aactaaagca agattgattg ctagagaagt tcaggggatg aatgcagaat tagctatggc  
67801 tagtttaaaa tttatgccaa acaagggtgc taaatatata gctaagtcaa tttcaagtcg



67861 agtagcaaat ggcggttttg aagcaaatga agtagtggtta aaaagttgcc gtgtagatgc  
67921 tgggtgctgta ttaaaaagat ttagaccgcg tgctagagga agtgcaagcc gtatcagaaa  
67981 acctacttca cacatcttag tagaagtagc aaaaatggaa gttaaaactg aagcaaaaaa  
68041 agcagtagct aaaaaaactc ctgttaaaaa aacaagtact aaaaaagtaa cggcagaaaa  
68101 ggaaagctaa tgggacaaaa agtaaatcca atcgggtctaa gactaggaat taatagaaac  
68161 tgggaatcaa gatggtttcc aactaaagca aattttagtgg aaaatatcgg tgaagattac  
68221 aaaatcagag ctttcttaaa aagaaaactt tattatgcgg gaatcagcca aattttagta  
68281 gaaagaactg ctaaaaagct tcgcgtaact gttgtagctg caagaccagg tattatcatt  
68341 ggtaaaaaag gtagtgatgt tgataattha agaaaagaac tacaagattt aatcggcaaa  
68401 gatgtaaata tcaacatcaa agaagaaaga aaagcgggtg cttcagctca acttgctgct  
68461 gaaagcgttg caactcaact tgaaaaaaga atcgcctttta gaagagcaat gaaaaaagta  
68521 attcaaggtg cgcaaaaagc aggtgctaag gggattaaag tttcagtttc tggctgttta  
68581 ggcgggtgctg aaatggcaag aactgaatgg tatcttgaag gtcgtgtgcc acttcatact  
68641 ttaagagcaa aaatcgatta cggttttgca gaggctagaa ctacttatgg aaacataggt  
68701 gttaaagttt ggatcttcaa aggtgaagta ttgcaaaaag gcttacaagc tgaaaaaaca  
68761 gaagaaagtg ctccagctaa aaagcaaaga cgcacaagaa ggagtaaata atcatgttaa  
68821 tgccaaaaag aactaaatat cgcaaaatga tgaaagggcg taacagaggt tatgctaatac  
68881 gtggaactga atttactttt ggtgaatthg cattaanaagc aactgaagca ggacgcatta  
68941 attcacgcca aattgaagca gctcgtatcg cattaactcg ttttgttaaa agacaaggta  
69001 aaacttgat tagagttttt ccagataaac ctttaactaa aaaaccttta gaaactcgta  
69061 tgggtaaagg taaaggtgca gttgaggaat gggtaatgaa tatcaagcca ggtcgtatta  
69121 tttatgaaat ggcaggtgtg agcgaagaaa tggctagaga agcattgact ttggctatgc  
69181 ataaactacc atttaaaact aagtttgtha caagagagag ccaaaatgaa atatactgag  
69241 attaaagaca aaacagcagc tgagcttgca acaatgctaa aagaaaaaaa ggtgctttta  
69301 ttcactttta acaaaaagct aaaaacaatg caacttacta atccaaaaga gattagcgaa  
69361 gttagaaaag acattgctag aatcaatata gcaattaacg ctttaaaaata aggataaaaa  
69421 atggcattta aaagagaaat acaaggcgtt gttgtgaaaa tcgcaggtga gaaaacagcg  
69481 agtattttgg ttgaaagaaa agtggttcat ccaagatata gaaaaattgt taaacgcttt  
69541 aaaaaatatac taattcatga tgagagaaat gaagttaaag tgggagatac cgttgtggcg  
69601 gttgaatgca gaccactttc taaaagaaaa tcatttcgct taaaatctgt attagctaca  
69661 ggagttgagt aatgattcaa agttttataa gacttgcagt tgctgataat agcggtgcaa  
69721 aagaattaat gtgtatthaa gttttaggthg gtagthaaaag aagatatgct actgtaggchg  
69781 atgtaattgt tgcatctata aaaaaagctt taccaaatgg taaggthaaa aaaggthcaag  
69841 tagthaaaagc agttattgtht agaactaaaa aagaaattca tagagataat ggttctthta  
69901 ttcgthttgta tgaaaatgct gcggttattc ttgataacaa aagagagcct atcggaaactc  
69961 gtatctthgg gccagthgggt agagaagthta gatathggthg ctttatgaaa atthgtthcac  
70021 tagcaccgga ggtattataa tggcgthtaa atthaaagatt aaaaaagthg atagcgthta  
70081 ggttatcaca ggtgatgaca aaggcaagac aggtthaaagtht tttagcagtht atccaaaaac  
70141 actthaaagthg gthgtthgagth gatgthaaagth tgcthaaaaa gctatahaaac ctagthgaaaa  
70201 aatccaaat gthgthtttht tcaatahaaga aatgccaatg gataththctat atthgthcaaa  
70261 agthtcaggag thagcgacga tgagathgaa aghaaaatac gatcahaagca tcaaacctgc  
70321 tthgthtaaaa gaaththgata thhaaatcc tatgctthtct cctgchgatag ahaaatcgt  
70381 tattagcgha gthgthggthg aactthgctha agathcahaaa gthattgcaha atthgtthcaga  
70441 tactaththct thgatagcag gachhaaagc thgtgathcacc aagcthaaaa aatcagththc  
70501 aggaththaaa gthgchthgag gththctctgt aggtthgathg gthactththaa ghaaaghaaaa  
70561 tatgththgct thtctthgata aaththattc thttgctthta ccaagagthgaa aagactthtag  
70621 agthththaaagth agagathgtht thgatthgagth agghaaththc aaththcggac thgatgagca  
70681 gthgatgthc ccagagththg agthathgataa aathththaaagth actcathgtht thgaaactthc  
70741 thathgthtaca acagchcahaa acgatahaaga ggcachhaaag thathgaghaac ththcggthgth  
70801 gccaththaca aaagghaaagth aagathgghctha ahaaatcaat gaththgcahaa gcgghcagchca  
70861 aacthhaaath thaaagthaaagth ggctathaca gatgchhaaath thgtgggchgt ccgchattcgg  
70921 ththathagaha thththggaath thgthagathth gccthaaghaa aatgggchhaat gaagghctthgaa  
70981 thccagthct thhaaaaagchha agctgthgthaa ghaathhaaath gathhaathgat athaththcag  
71041 attcathhaac aagaththcgha aatgchggghaa thgaghaagct thgaaachaacc aagctththgch

71101 attctaaagt tgttgaagct ttagttggaa tttttcaagc taaaggatat attgaaagtt  
71161 tcaatgttat cgaagaagat aaaaagaaat ttatcaatgt agtttttaaaa tatgacgaaa  
71221 aaggtaaaag cgttatcaat gaacttaaaa gagtttctaa accaggctcgt cgtgtttata  
71281 agggtaaaaga agaaatataa agatttaaaa acggttatgg tactatcgta gttagtacaa  
71341 gtcgtggcgt ttagcaaac gatgaagcct ataaagcggg tgttggcggc gaaatttat  
71401 gtaccatttg gtaaaaatct gctttttatg gcattgggta tccattcttt taaaaagta  
71461 gaaataticc agacaaataa aaaggaaaaa tatgtctcgt ataggtaaac aaccaatcgc  
71521 tatccctagt ggagtagagg ttaaattaga aggaaatttg cttaaattta aaaaaggaaa  
71581 ttagcaaaa gagcttgata caaaagcгаа tgtaaagtgt gagattaaag ataataacat  
71641 tcttttttct ctaaagggtg aagacagaca aagtagagca tattggggaa cttatagagc  
71701 ttagcttac aatattgttg taggcttaac tcaaggtttt tcaaaaactc ttgaaatcaa  
71761 cggagtgggt tataaagctg ctttaaaagg taaagtttta gaattaagcc tcggtttttc  
71821 acatcctatc aactatgata ttccagaagg aattgaaatc actgtagata aaaacaatgt  
71881 tatcattaaa ggaagtgata agcaagtagt aggacaagtt gctgctcaaa ttcgtgaatt  
71941 tagaccacct gagccatata aaggaaaagg cgtaaagtat tctgatgaac gcattatccg  
72001 caaagctggg aagacatcta aaaagtaagg ataggcaatg agagcaaatg tactaaaaag  
72061 aaaactaatt ttaagaatta aaagaaaaa aagaattaga gcaaaaattt caggatgtga  
72121 aagcttccca agaatttctg tttttaaatc aaatagaact ctttatatcc aagcgattga  
72181 tgatgttaaa gctgtaactt tagcagcagt agatggacgc aaacttggcg ttaaagcaaa  
72241 caaagaaggt gctaaaaaaa tcgctgctga atttgctaaa gtgttaaaag ctaaacaaat  
72301 agaacaagct gtgtttgata gaaatgggta tgtatatcac ggagtaattg cagcattagc  
72361 tgaatcttta agagaaaatg gtattaggct ataaggggta aatcgatgga aaaatataat  
72421 agagaagaat ttgaagaagt aatcgtcgat atcggcagag ttactaaggt tgttaaaggt  
72481 ggtagaagat ttagatttac tgctttagtt attgttggaa accgcaaagg tttagtaggt  
72541 gttggttatg gcaaggctaa agaggttcct gatgctattc gcaaagcagt tgatgatgca  
72601 tttaaaaata tcgttgaagt gaaaactaaa ggatcaacta ttgctcatga tgttgaagta  
72661 aaatacaacg caagtagaat tttacttaaa ccagctagcg aaggtagcagg agttatcgcg  
72721 ggcggttcta ctctcctat cgtagagcct gcgggtatta aagatatctt aactaagtct  
72781 ttaggttcaa ataactcagc taacgtgggt cgtgctacaa tcaaagcttt aacaatgcta  
72841 aaaggataag aagatgaatt tgacaaaagc agcgggatca acgcataaaa caaaagaat  
72901 aggccgtggc caaggaagtg gaatgggtaa aaccgccact aaagggggca aaggtcaaac  
72961 cgctagaaag ggttataatg aaaaaagagg ttttgaagga ggtcagcaac ctcttcaaag  
73021 aagattacca aaagttgggt ttacttctaa aattgcaaaa cttatgtga ttaatgttga  
73081 aaaaatcaca gccgtaaaag aacttaatga aattacaatc gaaagcatca aaagcgttca  
73141 taaaatttca aagtctgtta ctaaaattaa attaattgggt gcaagcгаа aagacttagc  
73201 atcaaaaatt aaagacgaga atatcagcgt caccggatca aaataatgaa tagggcattg  
73261 acgaataaga ttttaatcac cttagctttc ttgtttgctt atagggttct ggcttatgtg  
73321 ccagttcctg gcgtcaatgc tgatgtgatt gcagaatttt ttaacgataa tcaaaacaat  
73381 gctttgggtt tatttaatgt ttttagtggg ggggcagcag aacgcttttc tatcatctct  
73441 ttaggtatta tgccttatat tactgcttcg attatcatgg agcttttagc agctactttc  
73501 ccaaatatcg gtaaaatgaa aaaagaacgc gatggtatgc aaaaatatat gcaaatatc  
73561 cgttatgcaa ctatagtaat cactttagtt caaagtatcg gtgtggctat agggcttcaa  
73621 agcttacacg gaagaggtgg agcaggcgcct ataatgatag aaaatttaaa tatgtttatt  
73681 gcgctttgtg caatctctat gcttgcagga actatgcttt tgatgtggat aggggaacaa  
73741 atcacacaaa gaggtatagg aaatggattt tctttgatta tttttgcagg tattgtttca  
73801 ggaattccaa gagctatctc gggcacagta gggcagatta attcaggcгаа aatgaatttc  
73861 ttaaccgctt ttgttatcct tgttttgatt ttaatcacta tcgggtgtgat tatatatgta  
73921 gagcttggag aaagaagaat tcctatttct tactcgcgta aagtagtaat gcaaaatcaa  
73981 aataagcgta ttatgaatta tattccaatt aaaatcaatt taagtggagt tattccgcca  
74041 atttttgcaa gtgcaatttt aatgtttcct acgactatct tgcaacaag tacaatccg  
74101 tttttgcaag ctatcaatga ctttttgaat ccaaatgggt atctatctca tgttttgact  
74161 ttcttgtttg tgattttctt tgcgtatctt tatgcttcta tagtatttaa tgctaaggat  
74221 atagcggaaa atcttaaaaa acaaggaggt tttatccctg gaattcgtcc aggcgaaggg  
74281 acagcaaatt atcttaatga agtagcttct cgtcttactt tatcgggttc tatttattta

74341 ggacttgtag caaccttgcc ttgggttttg gttaagttta tgggtgtgcc ttttaatttt  
74401 ggaggtactt cagtattgat tgtagttcaa gttgcattgg acacaatgag aaaaattgaa  
74461 gctcaaattt atatgaacaa ataccaaacc ttaaagtcaa taggtttgta aatctttaac  
74521 acaaggagat agctccttgt gttttactct tactataaaa acatttttta tctttgtttt  
74581 aaaaataaaa atacgataca aactacaaaa tttaaaatag cccatatcaa aaaagcatca  
74641 acaagtccta attgtcctac tataggctga gagataatcg gactcaaaaa ttgccctaaa  
74701 aatatacagc tagctaaaat tccataagct cttagctcgtg ctttttcagg acagattgaa  
74761 aaaagataag cagtgttatt tacaagcatg atgcctccac ccattccaag caaggctaag  
74821 gcaaataaaa cagcgataaa atcatcaatc aaaaagagta ttaaaaaaga acaaccacg  
74881 ataaataaag tagcaacata aatcgtttta atgcttaaaa aacgcatgat atatttataa  
74941 cttagagaaa aaataccata acaaagcgca gagatcgaca ttgaaattcc tataaatttg  
75001 ggatctaagc ctagatgctc ttctatataa taaggaagtt gtgtaggaga aatataataa  
75061 accaccatga taaaaaatcc tataaaaataa ataggaaaaa atttccagta attagttttt  
75121 tcttctatct ttgtatgatt ataaaattta aattttcttg gctcaaaaag ataaatcatc  
75181 gctactaggg tgattaaaat tccaagccca taaacaaaa aaggatagcg ccaagaataa  
75241 ctcgaaacaa aaccgcctat agagataaat attgcaccac ctaccgcaca aaaaaagcct  
75301 tgaagactta aggcattttc tctacggtta aagccaccac gactgtaata atccccagc  
75361 aaagccgatg cacctgtcat tataaaagcc gttgccattc caaaaatagc tcttgaagta  
75421 agtatggcat agatattatt taagaaaaaa ccacttactc cagcaagtgt ccaacaacc  
75481 attgcaggaa aaacaaatth taatttacc aatttatcca ttaaaattcc cgcaaaagga  
75541 gataaaatca caacgaaaat agcaggtagg gttaatacta aacgcactaa aatatcaaga  
75601 tgtgccaagg taaaatttgt ttctacgcta gcacctgatt ggattaaaat atcttcaaaa  
75661 tgtctattga ttgcaggtaa tgctgatgag attaacacac ttcctagcat agtcattgcg  
75721 gccattgaaa ataccgcgat tttaaagcct gatttttccg tgatctcaac cttttttta  
75781 tctaattttg tatcattggg gtgaaattta taagattttt tcttcatatg tggacctttt  
75841 ttggttttat tatactccaa aaattttctt ttgtatttaa agttacttct atttgtaatt  
75901 tataccttcc atttttcatc tgtatgggta aaatatcttt cactataagt agaatttcaa  
75961 aaatttttag ctaaattcag cttttaattt tttataggaa ttatttatct ttaattattg  
76021 atagtatttt tagataacaa gaagatgaaa tttataaagg tagtgataaa tgaaaaaaaa  
76081 tttgattata gtcgaatctc ctgcaaaagc aaaaactata ggcaattttc taggtaaaga  
76141 atatgaggtc atagcttcta aaggacatat aagggatttg cctaaatcaa gttttgggat  
76201 aaaaatagaa aacgatgaat ttatccccga gtatagaatt acaagtgatc atagcgcttt  
76261 ggttaaagag ctttaaggaaa aagcaaaggg agcaaaagag atttatttag caaccgatga  
76321 ggatagagag ggtgaggcta tagcttatca tatcgcaaaa gctataggta aagatgaaaa  
76381 tgttttaccg cgtattgttt ttcattgagat tactaaaaat gctatcgaaa atgctttaaa  
76441 aaatcctaga aaactggata tgaattctgt caatgctcag caaactaggc gtttgttaga  
76501 tcgtattgta gggtataaat taagtccttt actaggacaa aaaattcaaa gaggcttaag  
76561 cgcgggtcgt gttcaaagtg cagctttaa gattatcgtt gatcgtgaga aagaaattcg  
76621 tgcttttggt cttttagaat attttagtat agatatgact tttcaaaaag atttagatgc  
76681 agagcttgtc gaatttgata aagcaaagat agaaaagctt actcttaca ataaagatcg  
76741 tgcaaagcct gtttttgaag cgtgtaaaaa tgaaaattat gctataaatg atatagaaag  
76801 caaagaaaga aaaatcgctc cacctccacc ttttatgact tcaaccctac aacaaagcgc  
76861 aagcaatcgt ttgggattta accctaaaa aactatgatg atagctcaaa agctttatga  
76921 gggagtaa at acccatgagg gtgtgatggg ggttattacc tatatgagaa cagatagttt  
76981 gaatttagcc aaagaggcag ttgaaaatgc aagaaaattc atacagacaa attttgcaa  
77041 agactatctt ccaagcaaag caaatgctta tactacaaaa gctaaaggcg cacaagaagc  
77101 tcacgaagct atacgcccta ctaattttaa ttttactcca gaaatcgcag ctaaattttt  
77161 agataaagac gaattaaagc tctatacgct tatctataat cgtttttttag cttgtcagat  
77221 gaatcctgct atctctcaaa ctcaaaatgt ttttgtaaaa aatgacagag cagtgtttaa  
77281 gataagcggg aggaaaattc tttttgatgg gtattataaa gtttatggcg atatggataa  
77341 ggataaaatt ttgccaaatc ttaaaatcgg tgaaaattta aaagtgcaaa atttagaat  
77401 gaattcacat tttacagaac ctcttcaag atattctgaa gctggacttg tgaaaaaact  
77461 tgaaagctta ggtataggtc gtccttcaac ctatgcaccg actatttcta tacttacaag  
77521 tcgtgattat gtaaaaatcg ataaaaaaca actcattcct agtgaagttg cttttagcgt

77581 aactgaagtg cttgaaaaaa attttagcga tatagtagat agcaaattta cttcaaatct  
77641 tgaataact ttagatgaga tcgcagaaga taaagccaat tggcaagaga ctttaaaaga  
77701 attttactat cttttatga gaaagggtga agaaggaaaa acaaaaattg caagccaaaa  
77761 aacgggtgact aaattgggtg aaaattgcc tgattgtggc ggtgagcttg cgattagaaa  
77821 agggcgtttt ggagaatttg tagcttgttt aaattttcca aatgcaagt attcaagaaa  
77881 tttaaaaaat gaaagcaaga atgaagctga agtaagtgt agcaaggcta aagcaaaggg  
77941 tataggcatt acttgtccaa gttgtaaaga gggtagata gtagagcgc tttcaaaacg  
78001 cggtaaatth tatggttgta gcgcttatcc aaaatgtaat tttataagca aatataaacc  
78061 aagcgatgaa aaatgtgaag agtgtggaga gaatttggt ataaaagagt taaaaaggg  
78121 tacattctta gaatgtttaa aatgtaaaat taaaaagaa ataaaggatt gattatgaaa  
78181 gttatgcttt gtgctatthc aaatatagca agtggaaatt gttctgaaga ttgtaaatac  
78241 tgcacccaaa gtgcttatgt aaaaacaaat atacaaaaat atcgtcaaaa agaaatttca  
78301 caaattgtht tagaggctaa gatagctaag aaaaatgaag ctttgggttt ttgtttggtt  
78361 acagcagggc ttggcttga tgatgaaaaa ctcgaatatg tttgcaaagc agcacatgca  
78421 gtgcaaaaag aagtacccaa tttgcttct atagcctgta atggtaggc aagtgtggag  
78481 caattaaaag agcttaaaaa agcaggaatt ttctttata atcacaatct tgaagcttca  
78541 aaagaattht ttccacaaat ttgcaccact catacttggg aaagtagatt tcaaccaat  
78601 ttaaagccta aagaagcagg gcttatgctt gtgtgtggtg gaatttatgg tatgggggaa  
78661 agcgaagagg ataggataag cttgagaaaa tcattgcaag aattgcaacc ttttcaacg  
78721 cctattaatt tttcattgc aaatgaaaat taaaattgc aagtccaaa attaatgtct  
78781 gatgaggctt taaaaattat aagcgatact aaagaagctt tacctgatac ttagttatg  
78841 gtagcaggag gtcgtgaggt ggtattgcaa gaaagacaat atgaaattht taaagcaggc  
78901 gcgggtgcta ttgtaatagg agattatctt actacaaaag gcgaagagcc aagtctgat  
78961 atagtaaaac ttaaagagat gggatttact tttgcatccg agtgtcattg attcacaggg  
79021 tttaatcgat ttacaaattc ttattgttat agctttatgt ttactattht ctccacatat  
79081 agctaaaatt ttgcgcttgc cgatttcagc tactgaaatt atthtagggg cacttatagc  
79141 gtatthtggg ttcataggca agagtgaaaa tthtactatt ttagctaag tgggtthtta  
79201 ttatcttatg tttatagcgg gtatggaagt caatthacgc gctthttht atattggacaa  
79261 agaagttgcc aaaaaagct tthtthtata cattthgctt tathcttht catctgctat  
79321 agtatggatt tttgaactth ctttcgtgtt gtthtthgatt atthccggtta tgagtgtggg  
79381 gctthtatcc ttgctthtata aagactthtg taaagagtgt tactggctta atacagctat  
79441 gatagtagca acattagctg aggtthgtthc catagtgctt ttaactatag ctggagctth  
79501 tttacgcgag ggaacgaata ttattgatgt agtacaaagc atthtataatc ttaatatatt  
79561 tttgggtctt gtthtthctta gthtthaaat tttgggcgta cthtthtggg ggtatccca  
79621 acttaaagtc gtactgatgc cttgggaaga caaaaatgaa aaagatataa gattthgtat  
79681 ggcaatthtth atthtthgatta ttgtggctat gattattaca aaactthgaaa ttgtthttagg  
79741 thctthtatc gcaggctcat ttatcgcaac cthtthtthgat cataaaaagg atthtagagca  
79801 taaactthct agthtthggac acggctthtth aatcccaatt tthtthcatc atataggaac  
79861 tactthtthgat ctthaaatga tthtthgaaata cgaaatcgta cttgatgcaa tthtacttht  
79921 gthtthgtaatg gtgggtthtga gaatthttht tgctagtgt tthtthgaaaa aaattggtht  
79981 tcaaaatath atthtthtthg gactaagtca thctatgcct ttaactctc thattgctac  
80041 agctacgcta ggatactcag gaaaagtht cagtgaagaa cthtthtthcgg cactaathtth  
80101 aacggcttht tttgaagcta ttgtthgtgat gagtgcgatt aaatthttht caaatathaa  
80161 aaagtaatct aaatatcaca ggtthacttht thactcaaaa aggtthaatga atthtthaaat  
80221 thctthgataac gaaaaagtht aaaatcgctt tthtthtagcta gaattagthaa agthaaagat  
80281 taaaaaagga gcaaaaatgt caaattctgt tactgthact gacaatagaa atggthaaag  
80341 ctatgaatth cctatathatg atggthactac tggthcaagt gthtthggata tgggtagtht  
80401 thataaacia acaggaatgt thctthtatga tgaggthtth actthctacag ctactthgthaa  
80461 atcaaaaatt actthattthg atggthgaaaga ggtthgtthtth atgcaccgtg gthtatctat  
80521 agagtggctt gctgaaaata aactthtthtth agatthtagthc catctthtthac thtataaaga  
80581 actthcaagt agcgaaagac thgaagctth tagathatgag ctthaaaaaac gctthtatath  
80641 acatgagggg atgcatcgtc thtthtgatthc thtthctthgat aatgctcatc ctatggcagth  
80701 thtthacaaggc gctgthtthcat cactthtagthc thtthtthctt gatcaththaa atathgaatgt  
80761 tagagaagaa tacatggthaa tggcagctag agthtthtggca aaaatthctta ccatagthggc

80821 tgctgcttat cgttataaaa atggttttcc tatggccttac ccaaatttgg atcgtggatt  
80881 tactgagaac tttttatata tgtaagaac ttatccttat gatcatgttg aacttaaacc  
80941 tatagaagta aaagcactcg atactgtatt tatgcttcat gctgatcatg agcaaaatgc  
81001 ctctacttct actgttcgtg ctgtaggttc tactcatgcg catccttatg catgtatttc  
81061 agcaggtatt ggagcgcctt ggggacatgc tcacggaggc gcaaatgaag gtgttattag  
81121 aatgcttgaa gaaatagcta ctggtgatag agtagatgaa tttattaaaa gagcaaaaga  
81181 taaaaacgat ccattccgct tgatgggctt tggacatagg gtttataaaa attttgcacc  
81241 acgcgcaaaa gtgcttaaaa agcttcgtga tcaactaatt gatgaattgg gtattgatac  
81301 gaatttgatt aaggtggcaa ctcgtataga agagattgct ttgcaagatg attattttgt  
81361 acaaagaaat ctttatccaa atgtagattt tcatagcggc ttaattttaa aagctctagg  
81421 aattccaaat gaaatgtttg caacgctttt cgtgatcggg cgtacaccag gctggatagc  
81481 acaatggata gagcaaaaag aacaagaaac actaaaaatt gttcgcccaa gacagcttta  
81541 tcttggagaa acaagtaaaa tttaaatgat tgtgtgaaat taactttttc acacaaactt  
81601 cttatataat ttcaaaagaa tttttgaaa gtcttacaat gtttaaactc gataatttac  
81661 taaaaaccgc catagatgct agtaacgaag cttctaaggc ttttttaaaa gaaagaaaaa  
81721 acctacaaat ttggcaaaag caagataaaa ccccttaac atcagccgat cttgcttcaa  
81781 atgaaatfff aaatgatata ttgggaaaaa cggatattaa aatfffatct gaagaaggat  
81841 tgtaaatca agaagaaagt aaaaatttgc aaagtactg gcttattgat ccgctcgatg  
81901 gtacaagtgg attttttaaaa ggtagtgatg aatfffgtat tatgatcagt ttgatttatg  
81961 aagctcgtcc tgttttagct cttataaaaa atccttcaaa aggcgatatt ttttacgctc  
82021 atcaaaatac tagagtttat aaaaatgata aaatfffaga tacaatgag caagatttta  
82081 taaacaatca atccaaagct cttttaagcg tcaatcatct tagcaaagaa gatgaaaatt  
82141 ttgccaaaaa atatcactta gaaccataa acataggatc agggcttaaa ttttgcgcta  
82201 ttttagaagg taaagcggga atttataagc gttttgaaaa gttaaatagt tgggatattt  
82261 cagctggaga ttttttagtt aatcaaaatg gtggttttat gggaaactttt tctaaggaaa  
82321 tgattttata ttctccctta aattataagt gcgaaccttt tatttgcgctt tctcaaaaaa  
82381 gttttttaaa tatatatata cataaaaaa gcatataatt ttaaaattat taaaggataa  
82441 aatgaaaat tttttgtatt ttgcttatag gtatfffatt aaattctagt ctttttgcaa  
82501 ataatfffcc gcaaaaaaaa attatcaaac tagaacagca agaaagtttt gaaatcatag  
82561 atcttcaaca aaatgttgca aaacaaaatt tagatcagca aaaaggaatt tttgatagct  
82621 ctagcttggt gggtaaaaaa gaaagtattc gtaaagataa tgatgttgat tttgctatag  
82681 ttatgagttt tagacaaaat tttggctata ctttggatgg ttttagtata aatgctaaag  
82741 agttttctac tcttttttct aagaatttag tagataattt aaaattaaat tttgtaaatt  
82801 cagccgcaaa tgggttttat caagattcaa gaaccttagc ccgcttttagc cctaaagact  
82861 ctaaattact taatgtatct ctttttttaa aaaaagaaaa ggataaaagt caaatttatg  
82921 ccaaatttac agactatctt gtggtgataa atttagatga tttttatgta aatatcacia  
82981 attatfffgt cgcaataacc aaaaatgcag tagctaatat taacttcaaa gttgtttcta  
83041 caagcaatgg caaaatactt acatcaaaaa atgtaagatt aaatfffcca cttcatgcac  
83101 aagatcctag gataaattat caagaacttg tgaatcaaat gccaaatatg cttgctgaag  
83161 ttataaacia agagtttagga aaattaaatt taatagtgca ataaaaaagc ttaatcgttg  
83221 atttgcctaa tgcgatcttg tagttcttct atgcttaaaa attcttgtct taattctttt  
83281 gcgatttcat gcgcggttat aggatcaaga cttgacaaaa ttcttttaag ctcgtaagtg  
83341 atttgccatt tagtcatttc ttctaggttg atatfffatt gcatgaatta tccttttatc  
83401 gtaagaaaaa attgtttgat tgtagcgtga atttgattaa aaaatgctat tttttctaaa  
83461 atcatacata attaaaaaag aagtataaat tgagttttta aacgataatc acttcttctt  
83521 ctaaatttat accaaattct tcaaaaacct ttttttagc aagctcgata agaaaaatag  
83581 catcttcaaa actcgcattt tttttattga ttaaaaaatt cgcgatgctta tcgcttaaca  
83641 tcgcacctcc tttactaaag cccttaagtc ctacagcttc aatgagtctt cctgcaaaat  
83701 ctcttttgg atttttaaag atagagccaa agcttgctcc gctaggttga ttgtttcttg  
83761 cattttttaa attctcatct tttatcttat caaaacaaa accgagttta aattcagccc  
83821 aaaaaaaagg catatftaaa ggacaaaagc ggtagctaaa atcaatattt tcgcgcaaaa  
83881 tttcaccttt tgaagtggca attttgacta aattctgact gatgcactca tctttaagtc  
83941 ctgcattcat ttttaaaagt ccgccaagtg taccaggaat tttgctaagg tattcaaac  
84001 cataaagatt attttcttta gaaaaacgat acatftgact tgcttttgtt ttacaaccta

84061 tgcgaagatg taaaaagtct ttgttttgct ctaaaatttc aataaaatta aaattatcgc  
84121 ttaaaattcc tatatTTTTA ggcttaggac ttacaaggag attgtttgca ccgcctatta  
84181 aaaagccatc aaattcacga atttgatcca aaacttcaac ctcaaattcg cctccaatct  
84241 ttacagatga atatTTTTTA aaatcgataa tcatttgata aaagttggaa tttgatttaa  
84301 aatatTTTTca gtaaaatcaa tcattgtcgt agtcatccaa ggcattaataa agatgatgac  
84361 tattaccacc aagataatTT taggtacaaa agaaagcgtc atttcattaa tctgtgttgt  
84421 agcctgaaaa atactgataa taagccccgc gataagccct gctaaaagca tgggcaaaga  
84481 aagcaaaagt gtgattTTTaa aggtttgcac tccaagagca accaaggtgc tttcatccat  
84541 tttaatcctt ttttaagaatt tctaaattct tcatactcgc tcgggataag ataatcctta  
84601 gcatgtatga ttttatcata aaatttataa tcatatccca gtttaaaaag cacatctact  
84661 gctttaaatt gcatttcgTT catacagatg gagtttttat tggcatataa attcaataa  
84721 gtatcaagct ttttctcatc aacgcggatt aaatttcttt ccatcagcat aggggctaaa  
84781 atgcggcgat tagagtctgc tatTTTTTaca gcatttGTaa gatctctttc tatcttgata  
84841 gcatcactaa gcggcaaaga acgacgcaa gccattccgc ccaaaggtag gggtaaattt  
84901 tcttgcgcaa gttctagcca tataTCCCAa atttcagctt ctacgcaaag actactgtca  
84961 aattctaaaa tgctttcatg gattaaaacc cctgcatcta cttgccact taaaaccgca  
85021 ttttcaatct ctaagaaatt tttataaatg attctagctt ctggatattt catacgaaaa  
85081 attagagcat tagtagtatt tgcaccactt aatgcaattt taaaatttct ttttaaatgt  
85141 gtatTTTgtt ttttgataag ttttggTcca taaccctcac caaaacttac tgcagtgcgt  
85201 aaaagagcgt attcTTgagc aatcaaagga taaagtccaa acgagattgc cgtagcatca  
85261 aattcatttc ttaaagccaa atcattTaaa gtttGTatgt ctaaagctgt atTTTTatag  
85321 tcaaaatcat tccctatcca tcctagtTTA attgccatat acataaaaaat atcatcagca  
85381 tcgggcgaat gtgcgattgt aattgtTTTT ttcataactt tcctaatttt taatgaaata  
85441 atTTTTattc tatcaaaata aactattatt taattttatt ttgtTaaaat tctagctaaa  
85501 aatttgcaat ttttaaggaa aataatggac gataataaga aaaaatcgct tgatgctgcc  
85561 ttaaaatcgc tcgataaagc ttttggcaag ggcactattt taaggcttgg agataaggaa  
85621 gtagagcaga ttgatagcat aggaacgggt tctgtaggac ttgatcttgc gcttggTata  
85681 ggcggaattc caaaaggaag aattattgaa atttatggac ctgaaagctc gggTaaaaca  
85741 acgctaactt tacatattat agcagagtgt caaaaagcgg gtggggTTTg tgcTTTTatc  
85801 gatgctgagc atgctTTTgga tGtaaaatat gctaaaattt tgggcgTaga tacggataat  
85861 ctttatattt ctcaacctga ttttggTgaa caagctTTtag agatcgtTga aaccatagca  
85921 cgaagtgggg ctatagattt gatagTTgta gatagtgtTg cagcacttac tccaaaagct  
85981 gaaatcgaag gcgatatggg agatcagcat gtagggcttc aagcaaggct tatgtctcaa  
86041 gcattaagaa agcttacagg aattgtccat aaaatgaata caaccgtgat ttttatcaac  
86101 caaattcgta tgaaaattgg tgctatgggt tatggaactc ctgaaacaac aacaggagga  
86161 aatgcgctta aattctacgc ttcagtgcgt ttagatgtta gaaaagtggc gactttgaaa  
86221 caaaatgaag agcctattgg taaccgtgtt aaagtTaaag tagTaaaaaa taaagtagca  
86281 cctccattta gacaagccga atttgatgta atgtttggag aaggtTaaag ccgcgagggt  
86341 gaattgatcg attatggTgt aaaacttgat atagtagata aaagcggTgc ttggTTTTct  
86401 tacaagata aaaaattggg tcaaggTaga gaaaattcaa aagctttctt aaaagaaaat  
86461 ccagaaatag ccgatgaaat taccaaagaa attcaaaatt ctatgggtat agagggtatg  
86521 attagcggta gtgaagatga agaaggagaa gaataatgtt agtaattgaa gatgttagag  
86581 catatgaagt gcttgatagt agaggaaatc caaccgTaaa agcagaagtT gtacttagtg  
86641 atggaagcat gggTgcagct attgttccaa gtggTgcaag tacaggTtct aaggaggctt  
86701 tagaacttcg tgataacgat gaaagattTg gtggaaaagg tgtttTaaa gcagtttctta  
86761 atgTaaatga aactatagct gatgaaattt taggactaga tgctTtaaat caagctcagc  
86821 ttgatgatac tttacgcgag cttgatggta caaacaatta ctcaaaatta ggtgcaaatg  
86881 cgactttggg agtatctatg gcaacagcgc gtgcagcagc aaatgctTta ggagtgcctt  
86941 tatatcgTta tttaggggtt gcaaatgcaa gtatTTTgcc tgtaccaatg tgcaatatca  
87001 tcaatggTgg tgctcatgca agcaataata tagactTtca agaatttatg atcatgcctt  
87061 ttggTTTcac aagctTtaaa gaagctTTTgc gttcagTTTg tGaaatttat gcgatctTga  
87121 aaaaagagct tgTaaattta ggacattctg cagctTTtagg tgatgaagga ggtTTTgctc  
87181 caaatttagc taacaataca gagcctattg atctTTtaat gactTgtatt aaaaagcag  
87241 gttatgaaaa tcgtgtTaaa atcgctctTg atgtagcaag cactgaattt tttaaagaag

87301 gcaaatacca catggagggc aaagcttttt caagtgaaga tttgattgaa cgttatgtag  
87361 agctttgtgc aaaatatcca atttgcagca ttgaagatgg tttggctgaa aatgattttg  
87421 agggctggat caacttact gaaaaattag gcaataaaat tcagcttgta ggcgatgatt  
87481 tttttgtaac aaatgaagat atcttaagag aaggtatcat taaaaaaatg gcaaatgctg  
87541 tgcttatcaa gccaaatcaa attggaacta ttactcaaac tatgagaact gttcgtttag  
87601 cacaaagaaa caattataaa tgtgtgatga gtcacagaag cggtgagagt gaagatgctt  
87661 ttatagcaga ttttgctgta gctttaaaca cagggcaaat caaaacagga gctttagcaa  
87721 gaggtgaaag aactgcaaaa tataaccgct tgcttgaaat cgagcttgaa agtgacgaat  
87781 ttttaggaga aaaactctga gtgatttact caaagaatat gacgaaagca ccaagaaaaa  
87841 gagcttttat gcccatctta taaagatggg tttttgggct tttctcgtca ttgtaggagc  
87901 tttttatfff ggaaatatgc tttttgggca gtattcttta gatacccttc tttcgcttga  
87961 agcaacccaa gaagaattaa ataaaaaat atcttttctc aaagagcaaa acgccaaagc  
88021 acaaaaagat ttttttgaat tacaaggatt ataccccaat gaaaactaaa attttaggaa  
88081 tttttttgat tttttttct ttattaaatg ctgaggaaaa tcctttcaaa tcagagcaaa  
88141 acatgagtat gattgtgccg cctgattttc aaaaagagga tattaatfff aattctaag  
88201 caagagtttt aaaaagcgta agttttaatt atatcaatct tgatggaagc gaagaggtct  
88261 taaatattga cattaacaaa agcatagatt ggcatagata ttataccctt gtgcgttcta  
88321 aaagtccaga tccttcaaag gtttttgatg tttcagtaac catacctgag cgtaatgatt  
88381 ccaaaaaaga atccaacaat acagcaagta tagaaatacc attacagggt gataaaatct  
88441 atgattttat atcctatgcg gtgtataaaa ataaaattaa actcaatacc aatgatgagc  
88501 ttattagcga tttttccata ggtaatccta gtaaaattgt ggtagatfff aaatcagatc  
88561 tagtaaatcc tactaaaaat atacgcatta gcaattccct ttttaagcgc atagatfff  
88621 gctctcataa gggatattat aggcttgtga tatatttggga tggaaattat aattacaata  
88681 tccaaaaaga tgccacagga tatatgatca atctattgtg atgagaattt tttttttct  
88741 ttgggtgtgcc tgctttgctt ttgctagtga tttttgctt ttaagcaaga taagcgaaca  
88801 agaaattcaa aataagaatt ttaatgggta tttgatgagt gaaaagcttg atggaatcag  
88861 aggaatttgg gaagcaggaa aatftaaaac tcgtcaagat aatccaatcc atactccttc  
88921 ttatttcact tataatfff ctagctftaa acttgatgga gagctttgga tagctagggga  
88981 taaatftgat gaggtgtcag ctttaattcg tagcgataac ttagactcaa gtctttggag  
89041 aagtgtcaca tataatgfff ttgatgtgcc caatgcttgt gaagaattta aacttacttc  
89101 ttgcacttta agcaaccgct ttaaggfttt agagcagtat ttgcaacaaa atcccaatcc  
89161 ttatataaaa atcataaagc aaattcctat aaaagatcaa gagcatttga aagaatftta  
89221 taaagatatt atcttaaata aggggtgaagg tgtagtcata cgcaaggatc ttgctcctta  
89281 tgaaaaaggt agaagtaaaa atgctftftaa gftaaaacc tatgaagatg ctgaaatgtaa  
89341 agtcataggt tataccgaag gcaagggcaa attccaaggt aaaattgggt ccttgctttg  
89401 tcaaatgcca aatgataggg taattagaat aggtagtggg ttaaaagata aagatagaga  
89461 aaatccacct aaaaataggct ctattgtcac ttataaattc aatggactga ctaaaaattc  
89521 tttaccgctg tttccagfff ttttacatat aagagattaa aattcttgac tttgftttct  
89581 ttttctgata taatacctac ttttttcggg gtgtagcgcg gtctggtttag cgcacttggg  
89641 ttgggacca ggggccgaag gttcgaatcc tttcaccg accatftttt ataaatftat  
89701 acaaaatggg gagtgtagct cagtcgggta gagcatcaga ttgtggctct gagggctcgtg  
89761 ggttcaattc ccatcactca cccactaag cgttcgtagc tcaactggat agagcaacag  
89821 acttcggatc ttaggttat gggttcaatt cctatcgggc gcaccaccaa atfttttatat  
89881 gcgttcatag ctcagctgga tagagcaacg gccttctaag ccgtaggtca gaggttcgaa  
89941 tcctcttgag cgtaccatac tagcggatgt ggtgaaattg gcagacacgc cagacttagg  
90001 atctggtgca gcaatgctg aaggttcaag tcctttcatc cgcaccacaa tftaaaatta  
90061 tatctccctt aaattagtgc aatcgtcttt ttctttacaa aataaaaatt tcatftttat  
90121 ttaaatftta tttcgatfff tggaaaatta atcatftftta ttaaaaatt tgataaaatt  
90181 tfttaagfff ataaaatgaa tftttgatft aaaaatttca ataccatata aaattaaaga  
90241 gaaaagtatg caaagaatag tcgtaaaagt aggctctcat gtgatcagcg atgagaatct  
90301 tftaaatfta aagcgtfttg agaatftggg ggctftfttg gccaaatfta tgcaaaaata  
90361 tgaagftatt ttagftactt cagctgctat ttcagctgga tgtaccaagc ttcatataga  
90421 tagaaaaaat ttaatttaata aacaagfttt agctgcgata gggcaacctt tfttaatcag  
90481 tgtfttaaat gaatftfttag ccaaatftgg caaaatgggt gggcaaatft tgcttacagg

90541 aaaagat tttt gattcaagaa aggcgactaa gcatgctaaa aatgctattg atgcatgat  
90601 tgatttagga attttgccta ttatcaatga aaatgatgcc acggctattg aagagattgt  
90661 ttttggggat aacgatagct taagtgccta tgcgacgcat ttttttgaag ctgatttgct  
90721 tgtgattttg agtgatattg atggttttta tgacaaaaat cctagtgaat ttagtgatgc  
90781 aaagcgtttg gaaaaagtgt aatttatcaa agaagaatgg cttaatgtaa gtgttaaaac  
90841 aggaagcгаа cacggaacag gcggtatagt tactaagcta aaagcagcta aat tttttatt  
90901 ggaaaatgat aaaaaaatgt ttttagcaag tggttttgat ttaagcgtgg ctaaggcatt  
90961 tttgctagaa aataaaciaa taggcggaac tttatttgag tgattataaa tttttatttt  
91021 tccttaagtt ttgaagagta aaataaatta tgtgcataat tcataatact aaggagaaat  
91081 caatgaaaaa attagcaaga atttttcttt tagttgttgc ttttgcgctc agtgcttttg  
91141 catacgatcc ttatgcttgc tctttgcaaa atttaattaa tctaggtagt tgcaatccta  
91201 atttagtgcc taatgatgag tatgcttgtt gggctttacc taatgttaga gtaaattggcg  
91261 agcttgtttg tgcggagtat tattaatgtc tatttttagta aatgctgtag atacttttta  
91321 ttcgacaaa aatgaagctg tattttcagc ttctaaaagc gaaaatataa aaagaaatgt  
91381 cgcggatttt aatactgata ataatacaaa aaattcctgt tattttttta gtgatgataa  
91441 agaaatttct ttgaatttaa gcaatgaaag catggaactt ttgacaaatc attttagcgc  
91501 aatgat tttt ttaaaacttt ctaatggaaa tataggctta agcggaaaag cagccgcttt  
91561 tgtagaaggc tggataaaag atattatgat aaatagaaat tttttaaatg ccgatagggg  
91621 taaaaatggc agaatagaaa ataacgagta tttatcttta aaaaattcag tagaagatgt  
91681 tgcaaaaaat caagatttaa gtaagaat tttt tggggcagtt gttttaagaa tggctcaaag  
91741 tacaacaggc tatgttgaaa atacaattag cgataaaaagc ttaagtatag aagcacttat  
91801 ggatgaaagt ataaaaagt atagaaat tttt tgatgggatt attacgaggc ttgagtattc  
91861 tgctaaaggc ggtacagata tgcaaggcta tacgaattgg gctatagatg ctttaaatga  
91921 tatttttagat gatagcgata aagccaaaaa aattcattta gttgtcgcgc ctacaagcga  
91981 aatttggcat tcgatgcag gcaaaacatt aaatgagggt aaggcttatt atgataatcc  
92041 ttttagagcg acgagtggaa cttctgcttc tggtttttta aatatagtga ttgaagaacc  
92101 aagaatttta ccaggcaatg atttagaaaa tgaaaaagag caattgctta atgaatttcc  
92161 tgaatttaga gctttgatac aaaacaatcc caatattaca aaagaaaaac ttttaaaact  
92221 taagaatcag caaagaatca cacacaatta ccaagatcat caaaaacaag atttgcaaaa  
92281 agaatttaca caaaatttct ttaaaacaga tcttaaggcc taaattcctc taaaaaattc  
92341 ggcaatttcc aaaccttaca aat tttttata aagatgctcc attttagact ggattgagtt  
92401 agcttttaaat tcaaat tttgc tataatcaaa accttgaatt ttacacaaag cgaaatgatg  
92461 aaaaaatta tttttatggg cacaccaagc tatgcaactt gtatttttaa agctctttta  
92521 gaagatgaaa attttgagct ttttagcgtt tttactcagc ctgataaagc tgtgggtaga  
92581 aagcagattt taacaccaag cgatactaaa gcatttttgc ttcaaaaagc tccacaagtt  
92641 cctattttta cgccaaattc tttaaaagat gagagtgtta tagagcaaat tcgtgcttta  
92701 aagcccgatt ttatagtggg tgctgcttat ggaaaaat tttt tacctaaggc tatttttagat  
92761 atagctcctt gtatcaatct acacgcttcg cttttgccta aataccgagg cgctagtcg  
92821 atccaaagtg cgatttttaa tgccgatgaa aaaagcggag tttgcacaat gcttatggaa  
92881 gaagggttgg atacaggagc tgtgcttgag agtgtggagt gcgatataag agataaaaat  
92941 gtaaattgaag tttttgaaat ttttagcaagc ttagcagcaa aacttatcct ttcgactcct  
93001 ttaaattacg aaaaactcct tccaaaaaaa caagatgaaa gcttggctac acattgtaaa  
93061 aaaattaaaa aagaagatgg gcttgtgagt ttagataatg caagagaaat ttatcaaaaa  
93121 tacctagctt ttacacctg gcctggaatt tttttagaaa atggtttgaa atttatagaa  
93181 cttgagcttg tagatgagtt gaagcaaaat gctaaaatgg gtgaaat tttt agaactcgaa  
93241 aaagaaagt ttttgcttgc ttgcaaaacia ggaattttac gcattaaaaa gcttcaagaa  
93301 agcggaaaaa aggctcttga tggtaggact tatttaaatg gaaaaaggct taaaagtgca  
93361 gatagcttgt gttgaaagta ttgattctac ccatcttttt ttatgcgaac aaattcgaag  
93421 tggtaaaatc aatgaaaatt ttgcccttta tgccttaaat caaacaaaag gtgtaggcag  
93481 tagagaaaaa ttatggcaaa gctctagtgg aaatttgcatt ctttcttttt gcatcaaaga  
93541 aagcgattta cctagcgatt tgcctttggc ttctgtgagt atttattttg cttatttgtt  
93601 aaaggaaatt ttacaagaaa aaggttctag aatttggctt aaatggcca atgatttata  
93661 cttagatgat aaaaaagtag gagggataat aagcacaana atttcagatt ttatagtagg  
93721 tggatgggtt ttaaatttaa aatttgcctc tcatgatgct gctttgtgcg atgttgaat



93781 ttcacttgaa gatttgatag agaagttttt gcaaagacta gagaaaaaat ttttatggaa  
93841 gcatatTTTT agcaagtata tgttagaatt tgaaaaatca agacaattta gtgtccatta  
93901 tgaaggtaag gtatTTTcac ttgaaaatgc tttttatat gaggatggat caatTTTact  
93961 aggcgataaa aggggtgata gtttaagatg agtgagatta ttactatagc aaatcaaaaa  
94021 ggtggagtag gtaaaaccac aacagctgtg aatttggcag catctttagc agtggccgaa  
94081 aaaaaagttc ttttaattga tgtggatcca caagcaaagct ctacaacagg tttgggtttt  
94141 aatcgtaaca attatgaata caatattttac catgttttta taggtagaaa aaaactttcc  
94201 gatattatTTT taaaaacaga attgcctcaa cttcattttag ctccttcaaa tataggtcct  
94261 gtaggtatcg aacaagaact tgccaagggt gaaaacaacg aaaaaaaaaat gatacttaaa  
94321 aaccaaatc aagaagtgtc tgatgagtat gattttatca tcatcgattc tccgcctgca  
94381 cttggaagta tcaactatcaa tgcttttgtt gctagcgata gtgttatcat acctatacaa  
94441 tgtgagtttt atgCGcttga aggtgtggcg atggttttta atacgattaa aattattaaa  
94501 aaaactatca atcctaaatt aaaagtgcga ggatttttgc cgactatgta tagctcgcaa  
94561 aataatcttt ctaaagatgt tgtggaggat ttaaagcaga attttaaaaa gcagcttttt  
94621 actattaatg gcaatgaaga tgattttatc gttatacctc gcaatgtaaa attagctgaa  
94681 agcccaagct ttggaaagcc tatcactactt tatgatataa aatctcctgg tcttttggct  
94741 tatcaaaatt tagcatatc gatttttagga taaaacaatg ggtcttaata aaaatagagg  
94801 cttaagcacc ttaatgggag atgtaggaga ggtttatagt agagaattag gtcttgataa  
94861 aatcaagtg agtcttatag aaatttcaaa aatcactcca aatccttttc aaccaagaaa  
94921 aacttttgac gaagtggctt taaatgaact tgcaaattct ataaaagagc acggattaat  
94981 acaaccata attgtgctta aaaaaaacga tagttttatc ttggtagctg gcgaaagaag  
95041 gcttagagct actcaaattt taggagagga aaatatacta gcctttgtat cggatagtga  
95101 tgagagtaag cttagggaaat tagcactcat agaaaatc caaagggaaa atttaaatcc  
95161 tatcgaactt gcaaattcct ataaggattt aatagaagtt tataatatta ctcaagaaaa  
95221 ttttagccgaa ctcatcata aaagcagaac gcaaatcaca aatactttaa ggcttttaaa  
95281 ttttagattct aaaacacaag agcttatagc aagcggtaag atttcacaag gtcatgctaa  
95341 ggtttttagta ggtttagata aagaagatga aaaagtgcct gtagatagca ttttgggaca  
95401 aaaacttagc gtaagagata cagaaagact tgttcaaaaa gttaaaaata aagaaaatat  
95461 agaagatgaa gaatttgaaa attctatgca aaatttaaaa caaattttaa ataaaatcgg  
95521 ttttatgtgc aaaaaataata aaaaagaact cattattcgt ttagataata ttgataaaat  
95581 taaaaaactg actgaaattc ttaacaaaat ttaacaaagt cttagttttt atttgttaca  
95641 ataaaagact tataatatcc caaaggagat ctatgtttga agatattgat ccttcataa  
95701 tgcttgctac tatggctatt tttttagcta tgatagtgat tttaaacact atgctatata  
95761 agcccctttt gaaatttatg gatgaaagaa atgattctat aaaaaatgac gaaaataaag  
95821 tcaaagaaaa ttcacaagaa atgctaggag ccaacgatga ggttgaagca attcattgta  
95881 gtacaagaga agaaatccat aaaatcaaac aaaatgccat caatgcagct aaagaggaag  
95941 ctcaacaagc tataaaagct aaaaaggaag aactagagcg taaaatggct aacttctata  
96001 ccgaattaat atctcaaaaa aaagaacttc aagaccattt gtcagcacat ttgcctgacc  
96061 ttaaacaagc tttgcaaaat aatattaaac agcactaata aggagaaaga tgaaaaagct  
96121 attttacttt atttttttac tgcctttatg tgcctttggt gcatcfaatg gtagtggaga  
96181 gtatgatatt gttccaagaa caataaattt cttaattttt atagccatat tgtattatTTT  
96241 tgtagcaaat ctttttaag ctttttataa aaatcgaatt ttaagaattt ctttaaaatt  
96301 agatgaaatt caaaagaagc ttttggaaaag taaagcaaaa aaacttgaca caatgaaaaa  
96361 gcttgaagaa gctaaagcaa atgcagcagc agcttttagtt gtagcaaaaa aagaagcaga  
96421 ggtgcttgct caaaaaatta aagaagaac tcaaaatgag ctgcctttac ttgaaaaaca  
96481 ttttgaagaa caaaaaagct atgaatttag aaaaatggaa aaagaagttg tgtctttaac  
96541 tcttaaagag atttttgaag attcaaatat tgcttttaaaa cagaatgaaa tcattgatat  
96601 tatgatgaag aaggtgtcct aatgaatgat ttaatagcca aaagatacgc aaaagctata  
96661 actttaagag cagatatttc agaattttat gataatttgt ctattttaag ctcagctttt  
96721 gccctaccta aatttaaaaa tatcatagaa tcaaatcaaa ttcaaaaaga aaaaaatta  
96781 gaatttgTTT tttctttaat agaaaaagct agtcctagtt ttaataattt tttaaaatta  
96841 ttagcagaaa attcaagact ctcttgcat cctcaaattg ctaaagagct cgaaagacag  
96901 aaatctTTT aagaaaaat ttttttagga accgtttatt ctaaagaagt attaagcgaa  
96961 gatagtatca aagagcttga aagtagactt ggtgctaagt ttggtgtcaa aattaaattg

97021 caaaataaag caggtttaaa tgaaggtgtg aaaatthcac tagaagaatt aggttatgaa  
97081 atthctthtt caatgaaagc tcttcaaaac aagatgagcg aatatatact caaaattatt  
97141 taaggagaat gtgtaatgaa atthaaagct gatgaaatca gttctatcat aaaagaaaga  
97201 atcgaaaact ttgattthaa tttagagatc gaagaaacag gaaaaattat ttcagtagct  
97261 gatggtgtag ctaaggttht tggctthtaa aatattatgg ccggtgaaat ggtagaatth  
97321 gacaatggcg ataaaggtat ggcattaaac cttgaagaaa gtagcgtggg tatagttata  
97381 cttggaaaag gagagggtt aaaagaaggt acttctgtaa aacgccttaa aaaacttctt  
97441 aaagttccag taggagaagc tcttattggt cgcgtggtga atgcgcttgg tgaaccaatt  
97501 gatgccaaag gggttatcaa tagcaatgaa tttagatttg tagaagaaaa agctaaaggt  
97561 attatggcta gaaaaagtgt gcatgaacct ttacatacag ggattaaagc tatagatgca  
97621 cttgtgccga ttggtcgcgg tcaaagagag cttatcatag gtgatagaca aacaggtaaa  
97681 accactgtag ctgtagatac tattatthct caaaaaggac aagggttagt ttgtattht  
97741 gtagctatag gacaaaaaca aagtacagt gctcaagttg taaaaagact tgaagagcat  
97801 ggagctatgg attatactat agttgtaa at gcgggcgctt cagatccagc agcacttcaa  
97861 tacctagcac cttacacagg tgtaactatg ggtgagthtt ttagagataa tgcaaaacac  
97921 gctthtaattg thttatgatga thttgagtaag catgctgtgg cttatcgtga aatgtctthg  
97981 atthttacgcc gtctctccagg tcgcgaggct tatctgtgtg atgtthttcta tcttactca  
98041 agactthttag aaagagctag taaatthaat gatgagttag gtgcaggttc thtaacagct  
98101 ttgccaatta tcgaaactca agcaggagat gthtcagctt atatthcaac taatgttatt  
98161 tcgattaccg atggacaaat thtcttagaa actgatttht ttaactcagg aatthctcca  
98221 gctatcaatg tgggtctatc tgthtctcgt gtgggtggtg cggctcaaat taaagcaact  
98281 aaacaagtht caggaactth aagacttgat cttgcacaat atagagaact tcaagcttht  
98341 gctcaatthg caagtgattt agatgaagca agtagaaaa aactagagcg cggacaaaga  
98401 atggttgaat tgthaaaaca acctcttht tctccactta gtgttgaaaa acaagtagtt  
98461 thaatthttg caggaacaaa gggthattth gatgatgttg ctgthtcaaa aatcagagaa  
98521 thtgaagatg gaatthtacc atthtatagaa gcaaaatath cagatcttht tgaacaaatt  
98581 cgthcgaaaa aagctthtaga tgcaagacta gaagagaaat tagctaaagc aataaacgag  
98641 thtaagcaa atcattthata aggtthcttht atgtctaat taaaagaaat taaaagaaaa  
98701 ataaaaagcg tccacaatac gcaaaaaaca accaatgcaa tgaagcttgt thtctactgcc  
98761 aaatthaaaa aggcagaaga agcagcaaaa agatctagga thtatgcgca aaaaattgat  
98821 gagatththt gtgaaatthc atthcaagtc aataagattg thcataatga agaggattca  
98881 agatthgtth ththtctaaa gaaaaatcaa atcaaaaatg tggatctaat cthcataaca  
98941 gcagataaag ggctthgtgg tggtththt atcaagacc taaaggctgt aagtgactt  
99001 thaaaggaat atgaagaaaa aatatcaat gthctththt gagctattgg aaaaacagga  
99061 attgagtatt thaatthtca aaaaatagag cththtgaaa aatatcttgg cthtaagctca  
99121 agthctgatt atgataaagc thgtctgtth atthcaagctg ctgtagatga thththaaat  
99181 ggaataacag atgaagttgt thtagtgc attgatata aaaaatgat cacgcaagag  
99241 thaaaaatth ctcatctaat cccagtagag ccaaaacaaa tcgaaggaaa ctcaaattca  
99301 cththtagaac thgaacctga agatacagat cththgggag atthgatgaa aacatathth  
99361 gaatacaata tgtattatgc atthattgat thcttggctg cagaacatag tgcaagaatg  
99421 caggctatgg acaatgccac caataacgca aaagctagag thaaacaact taatthtagct  
99481 tacaataaag caagacaaga atctatcact actgaactta tcgaaattat cagtggtgtt  
99541 gagtcaatga aatagthaat ththtaaggag agtataaata atgcaaggat thththcaca  
99601 agtattaggt ccagttgttg atgtagatth taacgactat thgcctcaa thaatgaagc  
99661 cattgttgta aatthtgaaa gtgaaggcaa aaaacaaaa cthgtththt agtagcagc  
99721 acacttgggc gataatagag thtagaactat tgctatggat atgacagatg gcttagtaag  
99781 aggactthaa gcagaagctt taggcgctc thattagtgt cctgtgggtg aaaaagthth  
99841 aggaagaatt ththaatgtht cgggagatth gatcgacgaa ggcaagaag thgtththga  
99901 thaaaaatgg gcaattcata gagatccacc tgcattthgaa gatcaaagca caaaaagcga  
99961 aatththgaa acaggtatta aggtthgtgga thgtctgtc cthtatgcaa aaggtggtaa  
100021 agtaggactt thtggtggtg ctggcgttgg thaaacggtt atthattatgg agctthattca  
100081 caatgttgcg ththaaacata gcggttathc ggtatthgc ggtgttggtg agagaactcg  
100141 tgaggggaat gatctthata atgagatgaa agaaagtht gththtgata aagttgcctt  
100201 atgttatgga caaatgaatg aaccaccagg ggcaagaaac cgtattgctt taacaggtct

100261 tactatggct gagtatttta gagatgaaat gggctttgat gttttgatgt ttatcgataa  
100321 tatctttaga ttttcacaat caggctctga aatgtctgcg cttttaggaa gaattccttc  
100381 agctgtgggt tatcaaccga ctttggcaag tgaatgggt aaattccaag aaagaattac  
100441 ttcaactaaa aaaggttcaa ttacttcagt tcaagcgggt tatgttccag cagatgactt  
100501 aacagaccca gtcctgcaa ctgtttttgc tcaacttagat gcaacaacgg ttttaaatag  
100561 atctattgct gaaaagggtt tttatcctgc agttgatcca cttgattcaa cttcaagaat  
100621 gcttgatcca aatatcatcg gtgaagagca ctataaagtt gcacgcgggt ttcaatctgt  
100681 acttcaaaaa tataaagatt tgcaagatat cattgcaatt ttaggtatgg atgaattaag  
100741 tgaagaagat aaattgatcg ttgaaagagc aagaaaaata gagaaattct tatcacaacc  
100801 attcttcggt gcagaagtat ttacaggtag ccctggaaaa tatattttctc ttgaggaaac  
100861 tattgccggc ttttaaggga ttttagaagg taaatacgat cacttgccag aaaatgcttt  
100921 ctatatgggtg ggtaatatcg acgaagctat tgcaaaagca gataaactga aaggttaatt  
100981 tatggacaat ttaatcagtt ttgaaatagt tacacctatg ggtgtaattt atcaagggga  
101041 ggtaaaatca gttaccttgc caggaagcga aggagaattt ggagtactta aaggacatgc  
101101 tgctttgggt tcatctttaa aatctgggtg aattgatata gaaaaagctg atttaaatca  
101161 tgagttaatc gcaattgatg caggctatgc taaggtagat gaagataaga tcagcgtttt  
101221 ggctaagggc gcggtttgga tttcgggttc tagtgaaagt gaaatagaga aaaatcttga  
101281 aagcgctaaa gaattaatca aatctatgag ttcagataat acagcttttag ctgctacctt  
101341 ttcaaagctt gacaatgcaa aggttaggta gatgaatttt gaagcgatat ttcagttttt  
101401 tggaaagctca agcataatca cttatatagt cttagcttgg ctttccttat actttatact  
101461 ttcttttttt atacctttttt caagaatgac ttatttagcg gcttggaaaa ataaagaaaa  
101521 agaaagtcta gaatctctac tcttgggcga aaaagatttg agtagaacgc gctctatttt  
101581 aagaaagtgt acagatacta gcttatcaca tcttgagatt tataaaaatt tagcaagtcg  
101641 tcgtgcatct aatgggctta cttggctcag tatagtagct tcaacctctc catttatagg  
101701 actttttgga acagttatct ctatacttga gacttttggg ggtttaggga cacaaaattc  
101761 ttttaagcatt atcgcaccta agatcagtgat agcttttgggt gctacaggct gtggtatttt  
101821 agttgctatt cctgcttata cttttcatct tattattaaa agaaaggctt ttgaactttt  
101881 aagtattatt gatagtgaga ttaaagttat tagttctaata aataggatt taagatatgc  
101941 catttgatga tgagaaacca gagcttaata taactccttt ggttgatata atgcttgttt  
102001 tattggctat tttaatggta acagctcaa gcattactta tgaagaaaaa atcaatcttc  
102061 ctcaaggaag tcaaaaatcc acaagtgtc ctagtgttaa aagcttgatt gtcagtatca  
102121 atgccaaaaa agaaatattt ttaaatacaag aaaaatatag ttttgtaagt tttgcgata  
102181 atcttgcaca aaagaaagca caatttaata ccgatgagcc agtgtttatt agagccgata  
102241 agagtttaaa gtatgatgat gttatttttg tcctaagaag tattaanaat ttaggcttta  
102301 gtaaagtgcg cttacaaca gaataagctc atgaaagaat atggtttagg caagataaat  
102361 tcatttttgc ttgctgttgc ggtttatatt tttattataa ttcttatttt ttttagactt  
102421 gtaactcaca tggaacctgc aatccaatac actgatatcc aagatagttt tatcgatata  
102481 gagcttatgg agccttcaa gaaagtcgta aacgaacaaa gtaccctaa ggatattcaa  
102541 aaacctactc aagagcttga tattgaaaaa ctttttgcac aaactacaaa taaagcagta  
102601 aaaactgaag atgtggatca aaaagctagt aattttaatg agctttttgg tagtatcaaa  
102661 gagatacaag aggaaaaaac taccaaaata caatcaagcg ccaaatcgga aacaagaagc  
102721 agtcaaaaaa ctcaagcctc agaacttgta aagcaattaa acgatagttt acttgaagaa  
102781 gaaagtatca atcaaggtga aagtattaaa aatcaaaaga caggaattta tgatgagttt  
102841 ttaggaaagg tagtgcgcac cattacacaa agatggaggc aatatcatcc taatagttaa  
102901 aatattttcag ttaaggtaaa aatttttatt gatgaaaatg gaaattttgg ttatacttcg  
102961 gtcgaaaaaa gtggaaattc tttatatgat gcaaaggtag ctgaattttt ggaaaaccaa  
103021 aaaggtaaat ttatagctta tccacctcaa aataaaagca taagtattac tatgaattta  
103081 aaagatgagg cacaaattca aaaataattt aggagtaaaa atgaaaaaaa ttgtaacagt  
103141 atttttaatt tttttaggaa tactttgggc agaagatcct gtgattgatg ttgtaaatc  
103201 gggtgtagtc ttacaaaaa tcattgttaa agacaattcg aatttaagt atattaattt  
103261 aaagcgcagt ttttataata tcattgtaaa tgacttgaag gtaagttcaa attttgaagt  
103321 tgtaagtgat gcaagttcag aagcttcaa ttatactttt gagtatgatt taagtaaaaa  
103381 tggtaatgct ttaaatttgc atgtcaagat taaagcaggg ggcttggaaa aatcaagcca  
103441 aacctatgct ttaaattggtg tagaacagta tcctttttta gctcacaaaa gcgtaaaaggc

103501 ttctgtaa at gcattaggac ttgctgctgt tgaatggatg gatcataaaa ttttgattgc  
103561 tagaaattca agctctaaaa aaagtcaaat tatcatggca gattatactt taacatatca  
103621 aaaagtaatc attgatggag gattgaatth atttcctaaa tggggaaata aagagcaag  
103681 ctttttttat tataccgcat atgatcatga tagaccaacg ctttatcggt atgacttaag  
103741 aaccaataaa gcaagtaaaa ttttatcaag tggaggtatg gttgtagcaa gtgatgtgag  
103801 cttagatggc agtaaattac ttgtgactat ggctccaaaa gatcagcctg atatttattt  
103861 atatgattta aagtctaaaa atttaactca acttacaaat ttttcgggta tagatgtaaa  
103921 tgggaattht ataggcgtag atgatagtaa atttgttht gtttagcgatc gcttaggta  
103981 tcctaataat tttatacaaa atgtcaataa tggatctgct gagcaagcgg tttttcatgg  
104041 taaaaataat tccgcagtht caactataa agatthttht gtatactcta gtcgtgagcc  
104101 aatcaagta ggtgthttht atatttattt aatgtcaatt aatagcacag gtattcgtca  
104161 gtttaccgca aatggaaaaa atttatttcc tagatthtca agtgatggtg ggagtatagt  
104221 ctttattaaa tatcttggag cacagagtgc tttaggtgtt atctgtgta atgcgaacaa  
104281 gactttctat tttccattaa aagttgggaa aattcagtht attgattggt aaaaatttgt  
104341 aatthtgggt taaattht taatthttaga tataatgcta acaattht aactthgaaa  
104401 ggtcataaat gaaaaaatt cttthttagtt ctattgcagc atthtgcattg gttatcagtg  
104461 gttgtagcac aaaaagcact agcgtaatg gtgatacaag ttagattcag aatcgtggaa  
104521 caggtggtag tgatggctgg gatattgatt caaaaattc tcaacttaat gatactthttag  
104581 gaaaagtgta ttttgattth gataattht atatccgcc agatatgcaa aatgthttht  
104641 atacaaatgc taatatctt aacaatgaag taagcggtht aagtatcact gttgaaggta  
104701 actgcgatga gtggggaaca gatgagtata atcaagctth aggtthtaaa agagcaaaag  
104761 cagthtaaga agctctaata gctcaaggtg taaatctga cagaatcgct gthtaaaagct  
104821 atggcgaaac aatccagta tgtacagaaa aaacaaaagc ttgcgatgct caaatcgctc  
104881 gtgcagaatt taaactatca agataattht tgaaaaaat attctcagta gctcttatcg  
104941 gagctactth actthttagca gaaagctctg cttthtggthc aggagattth accagtaatt  
105001 ccccctatgg thtaacatca agtgaaaaat tactcaagga aaaattagat actthtaagca  
105061 ataataacgc acaagcaaat tctagaatta atgagattga acaagagtht gaaggattgc  
105121 aaagtaccth agaaggtata aattcgcagth atgctaaatc caattctaga ctaacacaac  
105181 ttgaaactaa tthtgaagct atagaaaata atthtaagcac agaactthca aatthtaaaag  
105241 cttatgthtga agaaagtaga aaaattcaag atgctaaaca taagcaaat aagaaaattt  
105301 taaccgaatt aagthcttht gtcgattcta thaacgcaa thtatgtatct aaagatgact  
105361 taaatagtht aaatthtaagth atcaaaaata cagthtgcgth gcctctatcg actgatgata  
105421 aaaacataac thctagcaat gaaaataaca tcagthtthc thcaacgcaa gaaaaagaag  
105481 thaaacaaat agatgattct tggaaaaaga aaaaaataa tgaaatthta gactthgtht  
105541 tcaagattth aaataataat thctatgaga atagthaaat taagthaaat thctcatac  
105601 aaaaacaata caaacccgca agagcaaat thtggthtagg agaaattgag tataagcaaa  
105661 aaaagtataa taatgctatt gthtattata aaaaagctc thctthttagc actaaagggg  
105721 atthtthtcc aaagctctth thcacacag cgatthctct tgataagata ggagatthca  
105781 aaacagctaa tggatthttht aaggctthta agacaaatta thctactca ccggaagcaa  
105841 aagctthccc aatagaaaa thaatcaag gagaaaaat ggctatagaa aaaaatagcg  
105901 tagthtthcaat gthtthttagaa thaaaagatg caaatacaaa tgaaatthta gaatcaaat  
105961 thtatgthtca acctatthct thtattthttag gcaaggtca aatthttagaa gctthttagaag  
106021 aagaagthtga gaaactthgat thccctagth atgctgattht thtagthtaag aaagaaaaag  
106081 gthttaggthca atacgatgaa aatgcggtgth aagthtthacc aaaagaacaa thtgcagtht  
106141 thgatthtaaa aatagthttag gagctthttht thgagggthca aatggtgaa accgthctcg  
106201 thactgthtaa agaaattgthc gataatgatht thgactattht thtataatcat cthtatgthcag  
106261 gthcgtgattth gctthtthtct thaaatatht thgatgcttag agthagcaagc gaagatgagc  
106321 thctthacagth cattatcgca ggaagctata gthtthtggtht thggaagthgga cacgthcagc  
106381 atcatcagthc acatgthcggth gthtggatgct gcgthtggthc thgthcggthgga thtthtggthc  
106441 actaagatgth acgctgtht thtthtthcca gthtcaagthc thcaagthct thgcatgtht  
106501 aaagatthtth atgaaaactc caaacctgca aaagaactth tagaaaaagc cagcagthtth  
106561 thgthaaatth atthtaaaaa thtattattht aatgaaaatg aagatthtaaa caaaagthgaa  
106621 thtacacaac thgthcact thtaaatthct thaatgthcgt atagthcttht gagcgaatta  
106681 aaactgthta thtaagthta atthtcttht thgthcttht thgthtgaatt thcagcttht

106741 gcgatcaatg gtgcttttag ctttttagaa gcaactatgc ttgtgcataa aagagggcctt  
106801 tttatgcaag aggattgtgc aaaggttgaa gcaggtatga tggtaatttt agggccttgat  
106861 gataagaaag tggaagaact ttgtcgaaaa gctagagatg aagataaaaa gatttttgc  
106921 gctaattata actgcatgag gcaaatcggt gttgcaggtt taaaacctga tttagcaagt  
106981 tatgaaagtg tatttaagga agcaggtgct aaaagggcta tgcttttaaa tatgagtgt  
107041 gcaagccatt gtccgctttt agaaaacgcg tctaataagc tttgcataga gcttgaaaga  
107101 atactagagc ctaattttta agccgtgatt tccaatgcta cagctaaagc ttatacgagc  
107161 aaacaagaag ctcttgagct tttaaaaacc caactttagt ctcctgtgct ttataaaca  
107221 agcattaaag cttgtgaaaa tgaagcagat tattttatag aatttggcgc tagcgtgctt  
107281 aaaggtttta ataaaaaat cacttcaaaa gaaacctatg ctttaacaaa tatgaatgat  
107341 atagaagaat ttttaaggt aatataaatg aaaatagcaa ttttaggtgc aatgagtga  
107401 gaaatcactc ctttgcttga aatattaaaa gattatacaa aattagaata tgcaataat  
107461 acttattatt ttgcaacta taaaaacat gaacttattc ttgcttattc taagataggc  
107521 aaggtaaatt ctaccctaag tgctagtgtg atgatagaaa aatttggagc gcaagttttg  
107581 ctttttacag gtgttgagg agcgtttaat cctgagcttg agattggcga cttgctttat  
107641 gcgactaaat tagcacaata tgatcttgat atcactgctt ttgggcatcc attgggtttt  
107701 gttccaggaa atgaaatttt tataaaaaa gatgataagt taaacaatct tgccttagaa  
107761 gtcgcaaaag aattaaatat caaacttctg gcaggtatta ttgcaacggg tgatgaattt  
107821 atctgcatg aggcaagaa agcaaaaatc agagagattt ttaatgccga tgcttgcgaa  
107881 atggaaggag caagtgtggc tttagtgtgt gatgctttta aagtgccttg ttttatctta  
107941 agggcagatg gtgataaagc cggcgaaaag gcagaatttg attttgatga atttgtgatc  
108001 aattcagcta aaatttcggc taattttgtg cttaaaatgt gtgaaaaatt atgataaatc  
108061 tttagcaaaa attaatacgc caagttgcac aagctaagc taaattcggg ctcattaaag  
108121 atggagatag ggttctttta gggcttagcg gcggaaaaga ttcttttagc ttagcacatc  
108181 ttttaaaaag aatgcaagct cacgcacctt ttaaattcga gcttgaagca gcaacttta  
108241 gctatggtat ggggtgaggat tactcagggc ttcatgcgca ttgagaggag cacgggatta  
108301 aacacagcgt gattgattca aatatctacg aggtttcagg cgatacaata agaaaaaatt  
108361 caagcttttg tagttatttc tcaagaatgc gtcgaggtgc tttgtatact tatgctcttg  
108421 agaaaggttt taacaaatta gctatcgcgc accatttaga tgatgcagct gagagctttt  
108481 ttatgaattt tatccataat ggagctttta gaactttagc gcctattttat caaagcaaac  
108541 gaggtattac ggttatacgc cttttgattt ttgtgcgcga aagacaactt agagataatg  
108601 ctacgcaaaa tgaacttcag gttataggaa atgaaatttg ccctggtagt aaactaagcg  
108661 aaaaaaatgt aaaatttcca catgcaagag aagaagcaaa gcaactttta gctaatttag  
108721 aaaaagaaca tcctaagctt tttacgagtt taaaaactgc tttttcgaat ttgacacag  
108781 aaagtttttg gctagaaaag gcataatttg atgaaaaaag cttttgtttt ggtagattat  
108841 caaatgatt ttatcagatg aagtttgggc tttgaaaaag ctttaaaaat caaagaaaat  
108901 atccttaata ctctcaatca aatcgatttt aacaccacac atttgcttct tacttatgat  
108961 actcatgatg aggattattt aaggagtaa gaagggttaa atttgcctat tgagcattgt  
109021 ataaaagaca gtttgggttg gcaaatgcct aaagaattta caccctttt gcaaaaagct  
109081 cataaggttt ttcataaaaa tacttttgga agtttagaat ttgcaaat tttatgcaaaa  
109141 agtgaatacg aagaaattca ttttgagga cttgtttccc atatttgcgt cttttgtaat  
109201 atcatttttag cttttagcgc gaagccaaat tcaagactta tactcatca aaatttaagt  
109261 gcaagttttg atgaaaattt agaaaaatcc gcttttgatc tacttagagc ttatggcatt  
109321 gaaatacttt aatgcaaggc tttatacttc atacacaaaa agtaaaagat gaggatttga  
109381 ttgtttatat ttttaagccct aaagagcttg ttaaggcgta tcgtttttat gggcttagac  
109441 attctagtat tttaaatggt tataaaattg attttgcttt agatgaaaat cctagttttt  
109501 tgccaagact taaggatggt ttgcatttgg gttttgtatg gattatggat cgtgaaaaa  
109561 tgctgatttg gcaggaattt atccgtcttt tgtatcatca tttaaaagat gctcaagtgc  
109621 ttgaaagttt ttattttgag cttttagatg aatgtgtaaa acgttttgaa aagcaaatc  
109681 ccaaacgcgt aattgtagat gcttatctta aaattttaga atttgaggga aggctccatc  
109741 aagaatttag atgttttgct tgtgatgaaa gcatagaaaa tccatcact ttaatccgtg  
109801 cttttttacc ttcgcatcac acttgtgctt taggttatgc atttgaaaag cagaaattaa  
109861 aaaattttta tgaaagtaaa aattgtgcga tttttggtga tgaagaaata gggaatttgt  
109921 atcaattgat caaggagggt ttatgatatt aagtgatgaa aatgccaat ttttagagcc

109981 tatagcaagt tttttaagct ctaaggatgt ggaacttggt tttgtagaaa gtaaggaaat  
110041 gcaagagatt aacttagagc aaagaaagca agataaaacc accgatgtgc tttcttttcc  
110101 acttgaaaat atcgatgaga gcttgccttt gggttctggt gtgattaata tagatttggc  
110161 aaaacagaaa gctaaagagt taggacatag ttttgaagag gaagtaagct tgctttttat  
110221 ccatgccatg cttcatttgc ttggatttga tcatgaggta gataatggag aaatgagaga  
110281 aaaagaaaaa gagccttatag aacactttta tctgcccata agtttgatta taaggacttt  
110341 ggaagattaa gtaagatfff tttctttaga cactagaaga cttgtgcttt atattttaaa  
110401 tatatgagta aaaatactta agaaaaaatc atttttaccg atttactttg taaatgaaat  
110461 tttattttaca aggtggcaaa gatgattaat ggtataaatt cttattcaag ctacaattac  
110521 acaaatactt ttagcaataa tacttcaaat acaaaatcat ctaatgttac aaatgataac  
110581 tcaaactttg taagcgataa atcacgagca gttgataaaa ttttaggcta tggcgtagat  
110641 gaatatggct tcttcacgag tgattttaac gaagctgcag gattgccaaa agattataag  
110701 atttttgcag agggtttaaa taattttgta aatagctttc ttaaaagaca acctttttac  
110761 tcgcaaatag acattgccga aactatagga aatacttata attctttttc atctttcgta  
110821 aaagataatg gattaggaga aaatcttaaa gaacaagatt tacaaaattt accacaaaaa  
110881 gatggaataa attattggca agagctacaa agtggtaatg ctttcatttg gaaacttggt  
110941 gatgaaaatg tagctgactt aggttcaaac aaatatcaaa tacaaaatgg agaaatatcc  
111001 aaagtggtg ccttagttgc tttttttaca aataatctta gctttgttga aggaaaaact  
111061 actttattag gtaaattagc tggacttaat agcaatacag acaatgataa aataaaagaa  
111121 tttttatcct ttatgaatgc aaatccttta aaatactctt atgaacaaga aggttggggc  
111181 aatcctatgg gagatagttt atctatatgg aattatatga atagagccaa gaatttagga  
111241 aatgataaac tcactaaaac tattgaaaat ttaggaaaag aatataatca attaataat  
111301 gctgatatga gtttagaaga atttaaaact aaatatcttg atttcaaca aagacacgat  
111361 gagtttgtaa aatcactaga agaagcagaa aaggcaaaag gtatagatta taataatcct  
111421 acaaaaagca caaataacaa agaaacttca gaagaagaca aagaaaagcc attcaagcct  
111481 atacaagcag aaagtaaaag cgaaacttac aaagatgata ataaaatgaa tgagctttta  
111541 aaaaagctac tagaaactaa atttggcaca agtgatgagc tagaaattct ttttggatg  
111601 aaatttagtg atgataatgc aggggaatff aataaaatfc tttctttaaa ttctgcacca  
111661 aaaattatag atattaaggc ttaaaaatat aaaaatftaa attataaaaa ggattaaaaa  
111721 tgataggtat caactcaact ttcaataact cttttgtcaa tcttaatat aaaaacaata  
111781 acaactcttc cttaaattca aataactaat taaaaaattt acaagatacc caagacacta  
111841 ctaaaacaag caataaagtc ttaggttatg aagtagataa agatggcttt tttacaagcg  
111901 attttaataa agctgcaggc ttaccaatct tgcataactt ccacccctg aaataagcat  
111961 gtcaaacfta ggtgttaggg cgtaaatgaa agtttgagtt aaaaacactt gctttgtatc  
112021 attccaaatt gtaggatctc cgcctattgt tatattaggt taaagagaat acgaatttgt  
112081 atttcttgtg ctaagtaaaag aaaagcttgt aatacttctt aagcctatft gctttttaaa  
112141 caaactgtct atattttagtt catcactagc aaaaaacaca actgactaaa accataaatg  
112201 ttaaataaat cttttttatt attgcctttc taaatatttt taaaaatftt tattcaaaat  
112261 agtaaatatt tcaaaataaa aatccgattt taatatataa tttatgatat tattcaaaata  
112321 aagagtaaaa tagttaagaa aaggagaagt tatgctaaag aaaatatcaa gcgctttgat  
112381 tttaggttct ttattggtaa gttctgcttt tgctagggat ttttttagcta aggttagtaa  
112441 tgggtcctfta agtgataaatt ctcaaggggt taagactctt aatftttgatg agatgaaaca  
112501 agttaagggt gggatatagag ttagtftftaa gctagtftgca aatgatgagc tftftagctftt  
112561 tgccaaaact acaccgagtg aaataggata ctatacagat aacaatggcg atacatatta  
112621 ttggaatagt cagggattaa ggcaatfttg tggaatgtgt ggtatagaag tcacaaattg  
112681 tatggtaaat aataaacata catatgctaa caaaaaaaga cftttgggaaa ctatgagcat  
112741 agtaggcgat gatccatacc actattatct tggttataca gtaaaaagaa atataggtgt  
112801 atcaaatfta ggacaaagat ttgtatattt ttcctatggc gtagctgtta ttaatgagca  
112861 attaggttct tggtataggg tgaattcaag tgctgtftta aataattatc aagttattaa  
112921 agaaattagt tccaaatata aaaatgatat ggaaatggct cttagtggta attattcgag  
112981 atatagaaat aagctatgat aaatagtata aatftcaaat taaactataa ctataatact  
113041 tcaaatftta agcaagataa aaatattgac tfttaaaataa acaagcatgg agtagctgtt  
113101 gtaacaggag aaggtgctftt gccttatcgt ggaaaaaaat ttgagtataa tcttaaaata  
113161 ttcggactftg atgaaaatat tagcaaaaaa gatatgcaag aatfttaataa cftttatgaag

113221 tcaaagtctt taaaagatcc aaataaaata gaaaagtctt cacttaaaaa tcttggtaaa  
113281 gatgataatt gggatataaa agatgaagat attaaattga tgaacttttc gtcttactct  
113341 caaatgttta atcttggatc tgatattgct ataaaagcat ctaatttttag gaatgaatth  
113401 aataaacttt tacaagaaga tttaaccta gaagaattta aaactaaata tcttgacttc  
113461 aagcaaagac acgatgagtt tgtcaaagaa tttgaaacag ctatgggtga taaaatgcta  
113521 cttgctaata ataatgatat tagtatgcaa gaagacaaag aaaagccatt taaacctata  
113581 caagcagaaa gtaaaaacaa agaaacttac aaagatgata gtaaaatgaa tgaactttta  
113641 aaaaaactat tagaaggtaa atttagcact agtaaagaat tagaacttct ttttggtatg  
113701 aaatttagcg atgatgatgc aggagaatth aataaaattc tttcttttaa ttctacacca  
113761 aaaagtatag atattaaggc ttaaaaatat aaaaatttaa attataaaaa ggattaaaaa  
113821 tgataggtat caactcaact ttcaataact cttttgtcaa tcttaatat aaaaacaata  
113881 acaactcttc cttaaattca aatacttcaa ataatagtgt aaaaaatcta caagataccc  
113941 aagacactac taaaacaaat aataaagttt taggctatgg cgtagataaa gatggctttt  
114001 ttacaagtga ttttaacgag aaagcaggca ttccaaaaga tataaaaatt cattctagca  
114061 ctatggaaag cttagtataa atatctacaa atgaaaaaaa tccattttaga gcttttgaga  
114121 gtatagacat tgctaaaacc gtaggaaatg cctataaaat ttttaagtcaa gttgtaggcg  
114181 aagatgtgct aaattctaaa gatagcttta gcttagaaga gatagccaac ttcccacaag  
114241 gctatgaatt taatcgccaa actatgcaag taacgaaaat ttataattct gctacggatt  
114301 atttaaatgc tgatatagat tttgattatg aaaatacaac tgatacaaaa ataaacaaat  
114361 tgttttttaa tactactgaa aatcttatga aaggaaattc tgccacagat atttttaata  
114421 ataatggcgg tgaagaaaat attaatacag gcgtattttt tgatacgaca ccaagcaaat  
114481 aactaataa agatggcact attactaaag gtgggctttt agtagctatt ataaatgaga  
114541 atatctatac tagagaagga gaggctacgc gtcaagaaa aaccgaaggc tttgataagt  
114601 ctatgagtg tgaagaagtc aaaaaagctt ggaatgatag aaactataat ttaaagttaa  
114661 atccaaataa tatagttcaa ggtgctggta ttgtcgatac aaataatgaa aatatagaat  
114721 ttacaccttt aattgaaata atgcaaaaag agcaaaaaga attaataaaa tacttacaga  
114781 gaaaacaaaa aattgatata acaattttaa tcacattaag gagaaagtat gctaaagaaa  
114841 atatcaagcg ctttgatttt aggttcttta ttggttaagt ctgcttttgc tggggatttt  
114901 ttagctaaag ttagcaatgg tgctttaagt gataattctc aaggggttaa agctcttaat  
114961 ttagatgaga tgaacaagt taagggtggg tatttagtgc gtttttaatt ttttaagat  
115021 cgtccaaatt taatttcaga agtttatgca attgcagatt tttcagaata cgaacttagc  
115081 aatcttaaca agggctctat tgggtcagga gatgaaaaat gctcaaacc tagtagagat  
115141 agattaatth cttggttgca agcgagtgct aattcccctg ctgaatatcg tcctgtatat  
115201 aaggtaaaaa gacaaataaa atactcaaat ttaggacagc cttatgtttt atttacttat  
115261 ggagtcggtg tttataatgt aaagaatgga caaatatatc aatataattc tagtcctatg  
115321 ttaaataata atacaatcat gagagaaatt gcttataaat atcaaaattc tatacaagat  
115381 gctatgggtg gttggaatcc aagatatttt aataaaatat cataaaaaaa aggggttttc  
115441 tatggtaaat tttgatactc aatatacaaa tattaattat ctaagcaata acacgaacaa  
115501 taaaaaatct gtgcttaaaa acgatgatga ttattttaat tccgtgataa aaaaatttaa  
115561 tttctctgaa aaaaccaag aagaacaagg atataatgga tctcctgatg taaaagaagt  
115621 agaaaactct ttatataaaa gatatatgga agataaacta agcaaggatg aaataaaaat  
115681 acttaataaa tttggcacag actatcttac agaaggcgta gatttgtccg cacttcataa  
115741 acgaaaagtt gatcttttaa aaactcttac aagtatgaat gaatttgaga aaatatgggg  
115801 tgctgaaagg gcgcaaagag aaaaacaatt ttttaatgaa cttggttaagc cgcttactca  
115861 agaagatata gataagttct tagctaataa aaacaatcaa aaagaagaca aagaaaagcc  
115921 atttaagcct atacaagcag aaagtaaaaa caaagaaact tacaagatg ataataaaat  
115981 gaatgaactt ttaaaaaaac tattagaagg taaatttagc actagtaaag aattagaact  
116041 tctttttggt atgaaattta gcgatgatga tacaggggaa ttttaataaaa ttctttctca  
116101 aaacacttcg gcaaaaatta tagatattaa ggcttaaaaa tataaaaatt taaattataa  
116161 aaaggattaa aatgatagg tatcaactca actttcaata actcctttgt caatcttaat  
116221 attaaaaaca ataacaactc ttccttaaat tcaaacactt caaataatag tgtaaaaaat  
116281 ctacaagata cccaagacac tactaaaaca aacaataaag ttttaggta tgaagtagat  
116341 aaagatggct tttttacaag cgattttaac gaagcagcgg gaattccaaa agattataag  
116401 atttatgcta aaggtgctga aaattttgth aattatatca ctaaccttaa ttttaaatct

116461 tttaccaata tagatattgc caaaagttta ggtaatgctt ataaggtttt ttcacagctt  
116521 attgatgaac cgagtggaaa ttttactact gaagatttaa gcaaaatccc tttaggattt  
116581 tcttatgata aaaaaagctt tcaggtagaa aatatctatc aaacccaaaa agagtttgat  
116641 agtgctttaa gtgcaacaa taatttacia atttatcaaa gtcctaaaca attggcgtta  
116701 agttttccaa gttggaatga aaattctcct aacgattaca ctaaaaagaa tagcgatata  
116761 tttgctccaa gttcccacat agatattgga gcatcatttt ataaaaatga taatggcact  
116821 ataagcaaag gtggtgtttt aatggcattt tttgcaggta tgtcaggaca aaatcctctt  
116881 atagaagggt aaacaacat agcaggaaaa cttaatggct atgataaaaa tataagccaa  
116941 agtcaagtag aagatttaa tgaatttata aaacaaaatc ctatcaata cggcataaca  
117001 ggagatatag gaacagattt tataaatggt ttaaaactta aaaacaatat tagcgatata  
117061 gatgaattta aaaaacaatg gctagaaatg aaagccaaaa gtgatgaaat gggagaagta  
117121 tataaagcaa agcaaaaaga agttatttca tgcgaagaaa cttcagaaga agacaaagaa  
117181 aagcctttta aacctataca agcagaaagt aaaagcgaac cctacaaaga tgataataaa  
117241 atgaatgagc ttttaaaaa gctactagaa actaaatttg gcacaagcga tgagctagaa  
117301 attctttttg gtatgaaatt tagtgatgat aatgcagggg aatttaataa aattctttct  
117361 ttaaattcta caccaaaaag catagatatt aaggcttaag attttttaa ttataaaaat  
117421 caagttaaac taaaaaattc ttctattttt tttcgcattt cttcgacatt gtcgatcgga  
117481 ttaacactat ctctaaaggc tgaagcatct ttatggcctt tggaatactc gtgtaaattg  
117541 ttacgaaata tactcacacc ttgatcttta tagtgtttta tcatttcgtc aaaatgagtg  
117601 agtatgattt cttttttgag tttttcatct acatttttac cacttttgat ttcataaaat  
117661 atccaaggat ttcccacgct tgcacgccct atcataagtc catcacattt tgtgatctca  
117721 taaacctctt tagcattttg agcattgata tcaccatttg cgatcacagg aattttcacg  
117781 cttgctttag cactagcaat agagtataa tccgcttttc cactataaag ctgctttctt  
117841 gtggtccgt gaatgcttac aaagtccacg cccaaacttt cgcaaatttt agccattttt  
117901 tccgggatatt tttcattaaa gcctaagcga aatttaacac ttgtaaggct tttttattg  
117961 tttcttttaa tcaactccac aaggctttta aaaagctcta aattttctag cagagcactt  
118021 cctgcacatt gtttgacgac tttatttaca ggacaaccac aattaaagtc aatgccatct  
118081 acaaaatcca tttcattaag catttgaact gcttttttaa gcacttcttt atcaccctct  
118141 gcaatttgga ctatataagg gttttcaagt tccgctcttt ctagcatatg taaggttttg  
118201 gagctttcat aaaccaaagc attggagctt atcatttcac ttatcgtgat atctgcacca  
118261 aattttttta ccacattgcg aaaaggcagg tccgaaaaac ccgcatagg agctaaaaat  
118321 aaaggctttt tgctaaaatc tatcattgta taagctgatt taaatcgatt ttgatatttt  
118381 tttcacgcag ggttaaaaag gctttaaaat cattgaattt tttgtcatca ttatgaattt  
118441 gctctctgag ttcatctaaa agtccaaatt cagccaaaag atataaatac gctcttaag  
118501 cttcaccttt ttcatttttg attttgttaa aaattcctat aagtgcata ggatttaaaa  
118561 gcttagtact tagttttgct atatacaagat agtctttttc gccaaaggata ttgtgagaaa  
118621 gtaaaacttc atattcggca gtattaagct ctaaatttcc ttctttaaaa cgcttgatga  
118681 gtgtaaggat atgacaagg ttttttgatga ttttgatatt ttaatttgc tcataagttc  
118741 ctttttttat caaactttca aaagccagat cttggaattc gtcttgagtt tgactaagggt  
118801 ttttgatttt ggaataagca taatttatat catttttgat atgatttttt tcattttcta  
118861 gaaataagat attattattt tcgagtttaa atttgttaag attgaagtat tcttcttttt  
118921 taatgccgtc tataagatct aaaatttcat tgattttggt tgcattaggg attttttcat  
118981 gtgtttttag ggttttagct agctgtgcta cttgtctaaa ttcctttggt tgaaagctga  
119041 tatttgattc tttttccaaa agaaggctgc gggtaaaatt ttcaaatttg gtagaatctt  
119101 tgaaaaaatg cttaaatttt aaagttagta aaaaataata aaaaccata tgaatgatgg  
119161 caaaaaacac taaaggatc aaaggtaaaa taagccatat cattataggt agctcgaagc  
119221 tatatgtatt gaaatttaa gtataatttc ctaattctaa ataccaagca agagcaata  
119281 taagagctat ataaataaag cttgctataa aaaataatct aatttctata actctctttt  
119341 ttctaaattt tcgcgacata cgatgcagta ttttgatga ggtttgattt taagtctttc  
119401 tatggcgatt tcttcatcgc aagattcgc taattcctaa gtgcatctt tgattttttc  
119461 taaagaatct tctatttctt ctaattcttg ttttaatta gcactgatag caaaatcaat  
119521 ttgcatcct gtttcaata cagaaaaatc cacactatca cttgggacgc tattatgtaa  
119581 ggcttcaatt tctttagaat tgctttgcaa attttccaat atagtttttt ttctattttc  
119641 taagatagtt ttaaaaactt gtatttctt ctttttctt gtttaacctt ttattttgta



119701 taaggatgat ttgagttgat acaaaaagca cgataaattt gttctaaaag taaaattttt  
119761 acaaattgat gtgctaaggt gagtttgctt aatgaaagtc taaaatctaa actctggctg  
119821 aattcatccc ttaggccata agcaccacct atgaaaaaat ttaaattatt tttatctgct  
119881 atgagttttg aaaattctac gcttgtaagc tccttgctc tttcatcaag aactatgcaa  
119941 aagccttttg tataaggagc aaatgcctct tcatagctta atttagcagc ttgtgcattt  
120001 aaattttgcg cagcagctat ttttttatta aagagattgt gttctttaag atctgcaaat  
120061 ttggagataa gttttgctga cttctcacc caaattttaa attcacggt tttttgtatg  
120121 tgaaaaatat taacttgcaa gttattttcc acaaaaagaat ttaagagtat cgctaaggta  
120181 ttttttcata tctgaacgct ctactatcgc atctatgagt ccatgttcga gtagaaattc  
120241 agctttttgg aagccttcgg gtaaactctgc acctatgggt tgtttaatta ctcttgctcc  
120301 tgcaaaacc accaaagcgc ctggttcagc gatgattaaa tccccagcc aagcgaaga  
120361 agcgctcacg ccaccatag taggatcggg taatacacta atataaggga gtttttctt  
120421 gcttaaaagt tttaaagcag cacttgtttt actcatttgc attaaagaat aagtactttc  
120481 ttgcattcta gctccaccgc ttgcactcac aataacaaca ggagttttat ctgtgatggc  
120541 tctttggatt gccctaacga ttttttcgcc ttctacagag cctaaagatc ctccatgaa  
120601 agaaaaatca aataactaca gttgagtttt aaggccatct ataaggcatt ctccactaat  
120661 gaccgcagat tttctaccgg ttttgctttc gccctcgctc aagcgttttt tataggactt  
120721 gctgtcaaca aatttgagcg gatctatggc ttctaaattt gcatcatatt caacaaaggt  
120781 attttcatca cttaggagtt ttatcctatc cataggagaa atttcatat gataagaaca  
120841 tttaggcat acattaaaac aagattctat ttctttataa tacattaaag catgacaact  
120901 ctggcatttt acccaatgat ttggagcttc tttgggtgctg ggttgttgc ttctgatttt  
120961 tgaaaaaata tctgcaaat tcataataat tcacctaatt attttaaaaa ttccaagatt  
121021 atatcaaaaa ttttcttctt tttactttat agaaggaaat tttcattggt ttctatatat  
121081 aaatttttac acaacattaa agctcctgca gtatcaaaga ctcgagtttt tcttaaaact  
121141 aaaacaaaac taaaatacgg agcataagca atgcttaaag ctgtagcacc caaagagcga  
121201 aatttaagct tatttttcgc gaggtaattg ataagatttg ggcaaagtgt tattttttct  
121261 acgatcccaa tttgagaaaa acgattaggc aaaaaaggag aataattagg attgaaaaga  
121321 tttgatttta aatttttatt atcatcaaaa attaaaattt cattattggc tagattgcaa  
121381 ataaaagcac tttgagcttc ttcatcttta aaaagtgctg cagatgtccc ataaaagggt  
121441 attttagaga caaagtttga acttccatct aagggatcaa gaatgatttt ataaggacta  
121501 ttttctccga tcaatccact ttcttcggaa aaaatttggc ctaaatcact aagatattct  
121561 gtaaagattt tttcacattt tagatcaagc ttatagcttt gattattatc aaagccaaga  
121621 tcaggagaaa actcaagatc gctttcacia atattattaa gatacttgct aatttgtaaa  
121681 tttgctttta ggcaagcatc tagaaattgt ttcattaaaa gcgtgttctc aggttaaatt  
121741 caaaagtatt ggtatcatcg ctttttttat cattgagcgg tttagcaaat acaagttgta  
121801 atggccaat aggagtgatc cattctatac ctaaacctgt actcattctt tgaatttcat  
121861 ctgatttttt attgcctatc ataccataat caaaaaatac actaccgca agtttaattc  
121921 tatcgattaa agggaagcta agttctacgg aatttgcaa agctatgggt ccaccactt  
121981 catctcccca ctcattttta ggacttacag ttctactttc aaaaccgca agagagcga  
122041 taccacctag ataaattctt tgattgattg gaagatagcc ctcatcccaa actttataaa  
122101 aacttgcttt ataacgataa ataagatcat agcctatata gtcttctaaa cttgataaa  
122161 agttaaattt tgtacttgat gaaaggaatt cttgatctc tccaagtcct gcatattcta  
122221 gacttgttga agcgataata ctttttcttg ggagataata atcatcagtg ttgttaaaag  
122281 taatagcagg agttacagag ctttttatag ttttgccaag ctcataacct gttcttaaaa  
122341 gtgttgggct tagatgatag atatcacttt gctcaagatt gtaagttaa cttacattat  
122401 aatatcttgc aaactggcgt cctagggtga tatcaaaacc ataatttttt tcaagataat  
122461 tatcccattc ataactatta gaataaagcg ttccgcctaa gctgtattga ctatcaagaa  
122521 tgcgtgggtt tataagactg attcttctcg ataaggatc atcactttta tctacgctaa  
122581 cagagctttt aatacctgaa ccaaaaatat tggatctga taatgatgca ttgagcaata  
122641 agccatcgct tgaaccatag ccaatacctc ctgaaatagc acccgtagaa gcttctttaa  
122701 cattgacaat taagtctata tgtgtatcat ctactttttc ttctttgatt tctacatcat  
122761 caaaaataaga cgttcttctt aaagcatttg tagattcgt taaatcggtg cgattgtata  
122821 aatttcctt agtgatataa agttcgcggc gaactactct gtcaactgtg cgagaatttc  
122881 ccgaaatgat aacatttctt atatagactt tatcatgagg aatgacttta aacacaacgg

122941 tagcttcttg ggtttgatca tttttttgaa tadcaggata aacttctgca aaagcatagc  
123001 ctaaactcagc acttttggtt tctatggttt ttacatcttt acgaatatct tctatattaa  
123061 tgagtttgcc ttgggttgag cgtagatttt ctaaattttg cttattttcc tcttcgctaa  
123121 ataaaggatt ttctatactt atgctttgaa ttttataagg cttaccttct ttgataaaat  
123181 aagttagatt agcttgataa gtatcagtat aggttttaag atagggcgag gatacttgca  
123241 catcaagata tccttttttc atatatcat cactgattct tgcactatca ttgcttagtt  
123301 caaaaatttt aagttttcca tcatttcttc cccacatcca gcccataaat tctttttctt  
123361 tattgactat agcaggttca atatctgaat acgaaaattt ctctgctccg cttaaattga  
123421 cattattaat gataatattt tctccgcgat tgactataaa ttcaagctct aatccctcgg  
123481 tttttctag agtttttttt ctgtattcta ctatgggatc aaaatagctt ttagcttcgt  
123541 aataagcttt gatgcgttcg cttgcttctt tggcacttgc ttcacaaac aaggttcctc  
123601 tttttatacc caaaatactt tctacttgct ttctatcatt agatgcaatt cctgtaatgc  
123661 ttatttttagc tatgcttgggt ttttctgtga cgatgatatt taaaacacca ttatcttctt  
123721 ctacggcaat attttcgaaa taattttggt tataaagggt aagtatggcg gtatttattt  
123781 tatcaagatt tattgtttcg ccgattttca atcctgtgag atttaaagca cttgcatttg  
123841 aaagatgatt taatccgcta aatttaattt ctttaattac tgccgcatta ctcagtgcaa  
123901 ccaaggcaca aatgctgatg atttttttca tttattttta cctaaagctt tattaanaat  
123961 ttgtataata gcagaaaaaa ttttaacaaag ggattgagat aatattatga aagtagcgat  
124021 tatagggtct ggattaatag ggggttcttt aggactttgc ttaaaagaaa ataaattaat  
124081 ttcttgtgtg tatggtttag actcaaataa agaaaatgag caagatgctt taaaattagg  
124141 actcgttcat gagcttatag aatttgaaaa tttgcattta tgtgatatga tttttattgc  
124201 aacacctgta aatgccatta tagagatttt acaaaaatta gtggatctac cttcaaatat  
124261 aactattata gagcttggaa gtacaaaaag aaaaatcata gaaaaattac ccgcaaaact  
124321 taccaaaaaa actccttttg cccatcctat ggcaggaact gaaaatagtg gtccaaaagc  
124381 agcttttaaa gagctttata aggatgctgt ttgtgtgttg tgcgatagtg aagtggtcga  
124441 tgatttgcac caaaaaagag cagtggaaat tttttcgcac ttgggtatga ggattgtttt  
124501 tatggatagc acggcacatg atcatcatgc tgctattatt tcacatttac cgcattgtgat  
124561 tagtttttct ttagcaaatt ttgtgatgaa agaggaggat aaaagaaata tcgttcattt  
124621 agcggcggtt tcttttaagg gtatgagtag gattgctaaa tcatctccta tcatgtgggg  
124681 gagtattttt gaacaaaaca aagataatgt ttttaagctc attgaatttt ttcaaaaaga  
124741 attagaattt tgtaaaaaga tgattgaaga ggataaaaat gaagaattaa agtcttggat  
124801 gcaaaaagcc aatactttta gagaaatttt gtgaaatttg cttgatattt actgaaatta  
124861 taataaaatt tttttaagtt ttttaagaaa aaataaattt tgttaaaata aaaatatatt  
124921 aggaaaaaat atggcaagaa aaaagggaaa attttatcta tatcttttaa ttttggtttt  
124981 aattgggtgct ttagcgtttt ttgcttcaaa aatgaatggt tttgaaacga cacctcctaa  
125041 aatccttatg ccagatatca tttatagtga tcttaaaaaa cctatttcgg ttcatgtaaa  
125101 agatgatgaa ggttttattg aaagtgttca aatcttcttg caaaaagaag gcaatggaac  
125161 aggtatgctt atagtagatg aaaaaattca aaattcaaat gatattacct tacaagttgc  
125221 tctaccaaaa cttgcttata aagaaaaagt aaaatctttt attatggaga ttaaagctag  
125281 ggataatagt ttttggattt ttttcaatgg taatgaagcc agtaaaaaag tccttgttat  
125341 gatcgatgat agtgctccaa aggtaaatat attgagcaat tcttatcaga ttgagcaagg  
125401 ggggtccgct agcgttgtat tctcggctag tgatgcgaat ttggataagg tttatataga  
125461 aacaaataca ggaaaaatct ttaaggctac tccttattta aaagaaggat attacgcagc  
125521 tcttatagct tgggatgcaa gagatgaaga atttcgtgct tatattattg ccacagacaa  
125581 ggctggcaat atcactaaag agcgtataag gtattatttt gtcaatcgca aataccgctg  
125641 ttcaaatatc aatcttacag atagattttt agatggcaag atagaagatt tagcacaaga  
125701 gtatgcacca aaagataata attttacgcg ttttgagaaa tttaaatttg tgaatgaaac  
125761 cttaagagac aataatgaaa ttttgataca taagatcact tcagaagtcc ctgaaagtaa  
125821 aatcgataat tttaaaatcg atttattttt accacttcga aatggtatga aggtagcaga  
125881 ttttgcgtgat cataggtatt attcttaca tggacaattt gtaagcgatt cttatcatat  
125941 ggggattgat ttagcaagtg tagcagaagc tcctattata agcaataatc caggtaaagt  
126001 cgtatttgca gaagaaaatg gaatttatgg acttaattta atcgtctatc atggttttgg  
126061 agtttatagt ctttatgggc attgttcttc taaaaatggt gaaattgatg agattttaag  
126121 caaaaaaagt gtaataggta gaacaggtgt aagtggattg gctttggggag atcatttgc

126181 ctttgggtgtt ttggttcaag gtgttgaaac acgccctgag caatggcaag ataaaaaatg  
126241 gatagaaaat aatatttaca atgtttttaa cgaaggtaaa aaaataatth taggaaaaaa  
126301 ttaatgaaac aattaacttt agcaaaagct gtaaaaggcg tgggtatagg gcttcataaa  
126361 ggagagccta tcgagattac cctagagcct ttagaagcaa atagtgggat agtttttttt  
126421 agaagcgatt taaatgctac ttataaggca agtcctgaaa atgttatcaa taccCAAatg  
126481 gcaacggttt tgggcgatga aagagggttt atttccacca tagagcattt aatgagcgca  
126541 atcaatgctt atgggatcga taatgttcgt atcgttttaa atgccaatga agctccagtg  
126601 atggatgggt caagtattag tttttgtatg atgcttgatg aagcaggggt taaagagctt  
126661 gatgcaccta aaaaaattat ggtgattaaa aagcctatag aggtaagaga tgggtataaa  
126721 tatgtgcggt taactccgac taaagaaccg cgtattaatt atactatcaa gtttgataat  
126781 gctgttatag gagaacaag ttataattht gaattcagta agaaaaacta tatagaaaat  
126841 atagcaagag ctaggacttht tggthttttht aaagatgttc aagctcttag agatatgaat  
126901 ttagcattgg gcggaagctt ggaaaatact atagtgttag atgataatcg taththttaa  
126961 cctgaagggt tgcgctthta ggatgaattht gtaagacata aaaththttaga cgcgattggg  
127021 gattthactt tgcttgggta ccgtgtththt ggagattata thtcatatgc tggaaagccat  
127081 cattthaaatc atthtactcac taaggaagtg thaaaagata aagatgcttht tgagatagta  
127141 actcttgaaa aagcaaatga aaaagcttht gaaaaggtht ttgcataaaa aathcattat  
127201 tgctthaatgc thtatctaaa cthttgatga tccggtgtht tcaagatgat aaacttgtaa  
127261 aaagtataga gagcgaagaa aaggcaagtg agthttgtcc aaaaaththt aagaththtgc  
127321 taaaagaatt tagctthttag gagthtaththt atgctaattg tccaggctct tatatgggga  
127381 thaaaaththt thtatgtaagt cthtagcacgc tgagtatagt gaaaaatath cctctththt  
127441 ctatcagtgct ththtgagctt aacagcaatc aaccctthtgc cgctcataaa aatathtggt  
127501 thtgtaaaaa agaagatgag atcatctthg aggaaaatac agctggagag ththththtac  
127561 ctccaaaththt aagcaagctt aataaaaaag atgataatct acctththtac thththtctg  
127621 caaththaaag aaththtagaa aaaaaththt aaththtagta cctgctacaa gtgcgaaththt  
127681 aggcctggg thtgattgtht tgggattgag thtagcactt ththaatcata ctaththtgcga  
127741 gaagtcaaat thththtagca tcaagtgtcaa tggcgaagga agtgagaath taagtcttht  
127801 aaaaaataat atththtgha gtathththt thgaaaththt caaagaththt gcggtaggaa  
127861 agatcaththt agathththt thgataatac cathcttht thctcgcggac thtgtagctc  
127921 thcggcagtg atthtctggcg ctaththtgcgag tgctthttag atggcgggtt thaaagcaga  
127981 thaaagagaaa atththttht aagcgttht atacgagaat catctgaca atathtctc  
128041 tgcagcgctt ggcggttht tagtatctgt ggtagaaaat gaaaaagtht thcagcataaa  
128101 aaaagaththt gatgaaaath taaatgctgt cgtggttht cctaatgtag cgatgagtht  
128161 agaacaagat cgtaatgcct tgcctthtcaa thtgagtht aaagatagth thththtatht  
128221 thgctattct thththtcttht cagctthttht ththggaaaa aagthttagtht thctthtctc  
128281 tgctagcaag gaththtattgc accaaacgcg thgaaatgcaa aaththtaccg agctththtga  
128341 ggtgcaaaaa ththtctctg thaaataaggc thththttagtht acgctthttag gthcaggctc  
128401 aagctththt agththtagcat acaaaagatga thgcaaagcat thtagctcaa aaththtggca  
128461 gaaaththtga cathththttht thctthttht ggaaththtgac aataaaaggct thththttht  
128521 ctaaaaaaag aaaaaaaag atataaththt acaaaagata aacatgagcc ththtgaatg  
128581 tgtatagtht thgaaaaatcg ataththtgha aaaagthtgc atcgaththt acaththtcaa  
128641 ggcgagcttht athaaagactt thgaththtgha cgcagthttht atthtgtgtht gactthtgcatt  
128701 thgagthtgaag gcaaaagctt gcaaaaagca thththttagat cthgcaaaaa thththttht  
128761 aathtactct agcagaaththt aaaggagata gthththttht gcaaaaatht gaaththtcatga  
128821 aaththtgcgaaa gaaththttagct atgaththtgha agaaaththt gagaaagcaa atgaththttagg  
128881 atththttht aagaccgcat ctaththtctgt agaaaccgaa gththtgcagcag gaaththttaga  
128941 gtatatacaa actththttht thctthttaggct thththttht aathththttht aagaththtctat  
129001 aaaaaaaagct aaagctgtht ctthaaagaaga aaaaaaaagaa gaaaaaacct ctthaaagaagtht  
129061 agaagththt gctccagcttht aagththttaga agaaagcaag cthgaaaccaa aagthtctgtht  
129121 agggcttht gaaaacatht aagagagctt agcagthtgcg actthttagcttht aaagaagagg  
129181 gctthtgtatc gthththttht aaaaagaththt agaaagacc gcgaaaaaag aagagcttht  
129241 ggctactact cththttht aagaacgct thgthththt actaththttht caaththtgcgga  
129301 thgaaaththt aagaaaaaga aaaaagagaa aagctththt thctcgcgacth aaaaagaaag  
129361 tgctgaaaaa atggacttht thgaaagtht thgaththtct thgaththtct thgaththtct thgaththtct

129421 agatgtggtg gttttacctg attttagcgt aaaagaacaa gaaaaaccac aaaataccat  
129481 gaaaaaacca cctaactttt tgcgtcaatc agttggaaat tcagcaaatc ttggacttga  
129541 gggcggaatt caaagaagaa gtcgtaaaaa accacctaaa aaagttgaga aaaaagaaaa  
129601 tgaagcgggt tcgagcgtag aaatttcaaa agaaattcgt gtttatgaat ttgcagataa  
129661 gataggcaaa agcgtaatg aagtgatctc aaaacttttc atgctgggta tgatgacaac  
129721 taaaaatgat tttttggatg aagatgcatg tgaattttta gctgctgaat ttggcataga  
129781 gatcaatc atcaacgaag cagatgagtt tgattatgta aaagactatg aagaagaagt  
129841 tgatgagaaa gatttggtta gtagagcacc ggtgattact atcatggggc acgttgatca  
129901 tggtaaaact tctttgcttg attatatcag aaaatctcgc gttgctagcg gcgaagcagg  
129961 ggggattact caacatgtgg gcgcttatat ggtggaaaaa aatgggcgta aaatcacttt  
130021 tatagatact ccaggtcacg aagcttttac tgctatgcat gcaagagggt caagcataac  
130081 agatacgtt atcatcgtt tagcagcaga tgatggggta aaaccacaaa ctaaagaagc  
130141 gattaatcac gctaaagcag cagggtgtgc tatcatcata gcgattaaca aaatggataa  
130201 agaagctgca aatcctgaca tggtaaaaa tcaacttgcc gaaatggaaa tcatgccagt  
130261 agaatggggc ggatcatatg aatttgtagg agtttctgct aaaacaggaa tgggtattga  
130321 agatttgctt gaaatcgtgc ttttacaagc tgatatttta gagctcaaag ccaatccaaa  
130381 aagctttgca aaagcaagt ttatagagag ttctatccaa aaaggacgcg gtgcggtagc  
130441 tactatcatc gtgcaaaatg gaacgcttaa agtaggaagt actatcgttg cgggcgaagc  
130501 ttatggaaaa gtgcgcgcaa tgagcagatg tcaaggcaaa gctttaaaag agatcaaacc  
130561 ggggtgaatgc ggtgttatcg tagggcttag cgaagtagct gatgcaggcg aaattttaat  
130621 cgcagtgaag agcgataaag aagcaagaga gtatgctaac aagcgccacg aatacaatcg  
130681 ccaaaaagaa ctcagcaaat cgactaaagt aagtatagat gagcttgag cgaagatcaa  
130741 agaaggaac ttaaaagccc ttcctgtgat tttaaaagct gatgtgcaag gatcgttaga  
130801 agccttaaaa gcaagcttag aaaagcttag aaatgatgaa attaaagtca atatcataca  
130861 cagcggagta ggggggatca cgcaaagtga tatagagctt gcaagtgcaa gtgaaaactc  
130921 tatcgtacta ggctttaaca tacgcccaac cggagagatc aaagagcgtg ctaaagataa  
130981 aggcgtggaa ataaaaactt ataagtcat ttataatcta cttgatgatg taaaagcctt  
131041 gctaggtggt atgatgagtc ctatcatctc tgaagaacaa cttggacaag cagagattag  
131101 acaagtgatc aatgtaccaa aaatcgggtc aattgcaggt tgtatggtaa ctgaaggcgt  
131161 gattaaccgc ggggctaaaa ttcgccttat ccgtgatgga gttgtggttt atgaaggaaa  
131221 tgtaagctca cttaaagcgt ttaaagatga tgctaaagaa gtggcaaaaag gctatgaatg  
131281 tggcgttagc atagaagggt gtgatgatag gagagtgggt gattatatag aaagctataa  
131341 agaagtagag gaacaagcaa gtctatgaat ccaagtgaga ttaaaaaact tcgcaccgaa  
131401 agtatcttaa aagaacttat ccctgaagct ttggcaaat tagatgatga gaatttgaaa  
131461 aatctttgcg tgggtggatg agagtgtaaa aaaggcagat acgatgcctt tgtatatctt  
131521 gataaaatgt tttttaatac tcacgagcaa gagaagattt taaattctt aaaaaagcg  
131581 agcagagctt tgcagaatta ttgtatgagc gaacaaggct ggtatagatg tccaaatctt  
131641 cactttaaat ttgatgatag acttgagtat caaaaccata tggacgcact ttttgaagag  
131701 ataaaaaag ataaaaatga ataattttta tgaatatata caatttaact caaaacaatt  
131761 tattgagcca ttggggacaa aggaaaaatt ttggattcaa gataaaaaat atctatttaa  
131821 aattggtcga gaaaatactt tagaaaattg tagcgaagag attgcatgtg agatcgcaaa  
131881 acttataaat ttacctgtg ctgaatatga attagctgtt tataaaaatg gaaatatttc  
131941 atatggagtg gctagtagaa attttctaaa ttctacttct aatttggtct taggcaatga  
132001 gcttttaagt gaaacattac aagaatatga caaaaatgca aaatataaat taaaaaata  
132061 taccttagac aatgttttgt ctttacctgt ttttcttgat aatccatcca ttttagaaaa  
132121 tatgataggg tgtttggtat ttgatgtttt tatcggtaat caagacagac atcatgaaaa  
132181 ttgggggatt gtttttgatg agaaaacaag agagattaat ttagcccaa gttttgatca  
132241 tgcggcaggt atagcttcaa aaataagtga ggaagcagct aaaataaaac ttcaaaccaa  
132301 ggataaaaa caacaagttt tagcgtattg tcttaaatca aatagtgctt tttgtgatga  
132361 gaggggcagg cgtttaaaaa atttagatgt attgaaaaat atcttaata aaagagaaca  
132421 aaatataagt acttttgcaa aacaatggat tgacaaaatt gtttcagttg atcaaagtgc  
132481 ttgtagtaat ataattgata aaatcccaa tgagtttata ggggaatttc aagaattatt  
132541 tattttagaa atgctcaata taaataaaaa acttattttgt gatttagtaa gggaaaatat  
132601 atgattttaa aagtgtgttg gagatcatca aaagctaaaa aatggttttt tataggagag

132661 ctttcttatg aaaacaatcg gtataagttc gtttatgatg aaaatatcta tgaagcacia  
132721 gaacaaggat ttgaattatt tacaaattha agtgatgtaa agttaaatta ttatagttat  
132781 gaattatthc cagtatthgc caatagattg ctttcaaaat caagatcgga atataaaaaa  
132841 tatcaagaat ggtagattt aaaagatgat aaaaatccat tagaagaatt atctaaaaac  
132901 aatggthtta gagttgttga ttttatagct ttgtatthga tacccaaagt acaaaaaaaa  
132961 tatgtagtag agthththth acataacgth gattgcattt ttgaatatca aaaatgctta  
133021 aatcaaataa aacaaggcga taatcttht ttggctaagg atattcaaaa taaattcgat  
133081 aaaaatgcta tattggtacg aactaaagat cctatgagta ththtaggcta tataccaaga  
133141 atthtataatg aagatatagc atcgattthta gcatacgatg aaaatgcbac thtaagtatc  
133201 aagaaaatca ataaagatgc accagthcag thtcaaattt tgtgtcgatt tgaagcaaaa  
133261 tggcctaaaa atthttatagc atthtgataca cgaaaggata aaaatgaatc ttgaagctth  
133321 atgcaaagaa gtgaatthtag agctthtatga tagcgaatta actagcgaaa atggtaagaa  
133381 aatthaccgc gthttatgtga tgaagccctt agatgaaaag ggtgaaagaa aagggtgtaaa  
133441 tctggatgat tgtgcaaggc thtagtgaat thtatcacc atththcgatg tggagccacc  
133501 tgtaagcggg gagtaththt tagaagtatc thcagcagga cthgagagaa aacttagcaa  
133561 gatagagcat thtgcaaaaa gtatcaacga gcttgtaaaa atcacaacca atgaaaaaga  
133621 aaaaatcgaa gcaaaaatca tcagcgtaga ggatgaaaat atcactthtag aaaatthtaga  
133681 aatcaagaa aaaactactt taaaatthtag cgatatcaaa aaagctagaa cththgtaga  
133741 atggtaaaagt taaaaattat aaatthtcta gcaattctaa tgtaaattgc gatgaaccaa  
133801 ataccatc tatgththgt agaaatthgt thththcata thththcatc gatacaatta  
133861 aatatactcc gtgattgcga atagctthth cthththctc gcctaaatcc aatcctaaag  
133921 thththcaat cataacatct atthgtactca ththgaaccg thththataat thththtatc  
133981 ththctthaa gththctthth gthctctatc cataggatth thcattcaaa thaaaaaaga  
134041 aatcaaattc tgtagaacta thgththcat catgththth gattatthgt thctthgthta  
134101 thccaataga thctaathth thctaathth tactthcata gthgctacca thgthgctta  
134161 taatagattg atthaacth thcattgaaaa taagcataaa aatthgattg gththctaaagc  
134221 catgththth taactctthga gaaagthggc aaatactthgc aaaatathct thtatctat  
134281 tgcatagaaa gaattgatta thgtctatath gathaaaaaa thththaatgct aataaagctc  
134341 cattaaccct agthgaaat ggattatata tagththct thcatactct aaagatagcg  
134401 gatctathth tgacaatcta atgaththt thctththgt thctththgt aatthtaata  
134461 aaaaatthth aatthgagtaa atthththaa caaatataaa thcaththaa thctatathth  
134521 thctaacth gtaaaatath ththctaaat aatthcattg gctthatacca thththtagth  
134581 thaaatthaat atgthththth agthththata aggaagththc atththththg atathgathata  
134641 aatgththth thththgcgta ththgaaaaa thaatththaac thaataththc ataaaaaagt  
134701 aaaaatthcaa atthgathca aatthththth catgthththg cathththata thctctththga  
134761 atthaatthtag caataththth aatthacggga atggctacac thththccaaa thththththtag  
134821 cththgathth cgctthgthth thththththaa ctaththggaa agctththgaa thctagcagct  
134881 thctctthggg thgathththct aggathththth thththththgth caaththgath thctggagcca  
134941 thththththaat atctagcgc ataththgctg gthththctg aatcathgath aaththgagaa  
135001 tagccaaatc caththctth ththggcgtg thctagththc thcgtgthgth thcagccat  
135061 aatththctg aaththgath thththctct atathththth thththththct caaaaatath thctththth  
135121 gathththth thgaththth ththctcath aaactaaatg atathththth aathththth  
135181 ththaaaaaag ththththth ctacaththata ththctththct thththththgc gthththcaaa gththctagca  
135241 thththththct ththththth atcaththggc atgthctthct aagthththth thththththth thththththth  
135301 aaagthctthc ththththctg atththththth cththththth thththththth aathththctct  
135361 gththththgth thctththctg gcgthgcaaca thththththth atgththctct aathththctct  
135421 aagctththc ththththctg aaththththth gctthgathth gaaathctgth thththththth  
135481 thththththth gaaththct thctththth thththththth thctcaththgth thththctgth  
135541 aaththgcaaa aaththgthth acaagcaaat ththctthct thththththth thththththth  
135601 agctththct gaaaththth ththththth atgctgthth thththththth thththththth  
135661 ththththctg ththththth ththththth atcaththth cththththth thththththth  
135721 aaththggth ththththth ththththth agaaaaaath ththththth thththththth  
135781 ththctththc ththththth actthththth gathththth thctcaththct thththththth  
135841 aaththctgct aathththth aathththth agthththth thththththth thththththth

135901 tgaaaaatgc tttatgttaa agcctgattt gtatatagaa aataaaatga ttttagatgc  
135961 taagtggaaa attccagata gcaatgaaga taaaaagcat ggcatagcac aaagtgattt  
136021 gtatcaaatg tttgcttatg cttgcaaat taaattcac gatattaac tgatctatcc  
136081 tttatgtgaa agaacgatga atttgcaaaa tacgataaaa gaattagaat tcaatgcaaa  
136141 tgagcatttg gcatttttaa atgataatag ctttttgaaa acaaatataa aagtgcgaagt  
136201 gatttttgca cttttacctt tttagtaaaa actttgctag caagtgtatc aaaaagccaa  
136261 agcaagctac agctatgata caagcaccgc ttgagagatt aaaataatag cttattataa  
136321 gccctaaaac gcaaaaaatc atactcaata cacttgctaa aatcattatc aaacctagct  
136381 tttttgtaaa attttcagct ataaaactag gtatgctaag caaagccatg atcaaaaata  
136441 tccctacaag gcgtatagaa atcactatgc aaaatgccat aagtgcgatt aaaagatagt  
136501 gaaaaaagct tgtatttatc cctcgcactt ttgcaaattc aacatcaaag cttaaagctt  
136561 caaattgtct ataaaaataa agcattaaaa caatcacaac cccatctact atcgccatca  
136621 gccatagatc ttgcattcct actgctaaaa tatttcctaaa aagataagcc atcaaatccg  
136681 tgctataacc cggacttaaa tctataagta tgatcccaaa agccatcca aaagcccaaa  
136741 tcacagcgac tatactatcg cttctgtgct cataacgctt cgataaaaat gctaccaaaa  
136801 aggctaaaa gagcgtgaaa atacctgtgc tgatcaatat aggcaaagaa aaataaaacg  
136861 ctataccaat gccccaaaa gctccatgtg taatgcctcc tgctatggaa aagagtcggt  
136921 ttatcatcac aagtgtacct acgactccac aagcaatgct gactaaaatc gcagccaata  
136981 aagcattttg aaaaaaggtg aaatttaaaa tttcaaacat ggctttcctt tgaaaatttc  
137041 aaacaaaaat tttctttttt gaaatttgat ttttttaaat ttcttcttgc aaattcttgt  
137101 tcgcaaattt tttctttttc gcaattttct tcatcgcaaa agcaagaatt taaactcatt  
137161 tctacatcgc aaaaatgcga atggttttca taaagggtgt ttaaaaatac gcttttgtct  
137221 tttcttttgg tattggtatg caaaaagagt tctttgttta aatagcgat tttatcacta  
137281 taagcaagca cgagattgat atcgtggcaa atgagtaaaa ttcctatacc cttttcatgt  
137341 aaagagctta ggagttcaaa aatttgaatt gcggatttgc tatcaacgct tgctgtaggc  
137401 tcatctaaga tcagcatttt gcattcatca accaaagctc tagcgataaa aacgcgttgt  
137461 ttttgacctc cgcttaattc attgattttt ctatcccaaa aatcctgcat gcctacactt  
137521 gctagagctt ctaaggcttt gtttttatct tttttgctat aaaaaccaa aattttttta  
137581 ttgacaagcc ccattaaaac aatttctata acccttgggc aaaagttagg atttgctaaa  
137641 gtgtgttgag ggacatagcc gatttcattt tttttaagcc catgaaaatt gatagttttt  
137701 ttagtcttta aaagtcctag gatgagtttt acaagtgtgg attttccagc accattaggg  
137761 ccgatgatgg aaagaaaatc tttactatca tagcttaagt tgatattttt taagattggt  
137821 tcgttattgt aagcgttaatt aagatttgat atttcaaaaa aaagcattaa aaaaacctaa  
137881 ctataaattt tcataaaaag cgtttgctgt tttcaaaagt tcattttccc aatcataaga  
137941 taataaatct atcttataaa tttttacatt atattctttt tctaaagttt ttgctgtatt  
138001 ttcaggaaaa tgagtctgta caaaaataac tttaatattt ttatctttaa tcaacgcacc  
138061 caaatttttt aaatcttcat tttttagttt ttttcctaaa aattctacat ggttttgcac  
138121 aagattataa cgcttagcaa agtatgacca agcgggatga tatgttataa attcctttatt  
138181 ttttactttt tgtaattttg aagagatttg taaatttaag acatctaact ctgttaaaaa  
138241 tttatctaaa ttacgcttgt ataagctttt gttttgaggg tatttttgaa ctagagcatt  
138301 gtaggtattt aaggctatgt tttgaaacta aataggatca agccaagtaa aaggatctaa  
138361 aatttctttg gagttgctag agctagtttt agctagagga atatcttttt gcatgtctat  
138421 gatttcaagt tttggaaatt tttgttttag tttgtctgtc aaattctttt caaattctaa  
138481 gcctatggta aagtaaagct cacttttttc aagctttttc atagggtttg atttggattt  
138541 tggcttgtgt gtattttag ataaaaatgt gatattttaga gtatcatccg ctattttttt  
138601 aacaaaaaaa gcttgtgggg ctatgcttac gctgattaaa ggtagatttg gattttcact  
138661 tggttgtaaa gtttttagcat aaagaaagga tttaaaaagt cccaaaaata taaaaaaag  
138721 gaatattttt ttcatattt tataccctaa agagaatgaa atttaaaaaat tataacaata  
138781 ttaagtttat aaatagaatt tctagttttt atatctatgt taaaaaaagt attttagatt  
138841 gttttttatg gaaattttga tattttatct aaaatcaaga ctaaaatcta ggataaaatc  
138901 ctagattaat gcaagctttc tatataagcc atagcgctaa gtgctgtctac agctccatcg  
138961 cccgctgcac aaataacttg ttttgagca tcttttctaa gatcacctgc tgcaaaaagc  
139021 ccaggaacgc tagtttgcatt ttttaagattg acacttactt gccaccttc ttccatctcg  
139081 cataggaatt ttccatcatc ttgcttttaa atttcatttc ttacattcag ccccaaaag

139141 gtaaaaattc ctggcacatt taaatctcta atgctacat cttttaattt tactttttacg  
139201 cctgtaacac ccattttatc accatatact tcatctatgc ttgcactagt gataagttct  
139261 attttttcat ttttctttac tttttctacc gtagaagggtg cagctctaaa ttcattctctg  
139321 cggtgaatta gataaacttt agaacaata tttgctagat ataatgcttc ctctaaagca  
139381 gtatcaccac cgcctaaaac cgctacttct ttatttttat agaaaaaacc atcgcaggtt  
139441 gcacaagtgc tcacaccttt gccaaaaaat tcatcctcac ctttaaaacc tgctcttttt  
139501 ggggcagaac cagtacaac tatcaccgct tttgcaagct ctgttttgcc accttctagt  
139561 ttaatagtaa aacttccatc ttcatttttt gaaatttggt ctacacctac catttcatgc  
139621 ttttaagcaa aacgcataca ctgttcgctc caaggtgcc aaaaagaaat tccatccata  
139681 acttgtgcaa caccgggata gttttcaatt tcagaactag aagtaatttg ccctcctggc  
139741 atcccctttt caaacattac tacattttta agaccacctc tagttgtgta aagtccagcg  
139801 ctaagtcctg caggtcctcc acctataatt gctacatcta acattatttt tcctttgtat  
139861 ttgaatttta ttgataataa tatacaaatt attcttaata gtagttaata aaaattatta  
139921 tttagtataa atttgaaatt tttggatgaa aggctagtaa aactagcctt gaagattttt  
139981 atagtaaaga atttaattta tcgctgattg cttgttttga ttgagcacca actaattgat  
140041 ctactacttc accattttta aagaagataa gagtagggat agagcgaaca ccaaattcag  
140101 ctgccaaatc accttgctcg tctgtattta ctttacaat ttttgcttta ccatcaaaat  
140161 catttgcaag ttcatcaatt actggagcaa gcattctgca aggtccacac catggagccc  
140221 aaaaatcaac taaagcaaca ccttcttttg cttgtgcaaa attatcactt gtttaattcaa  
140281 tatattttcc cataattttt cctttcacta atttctgtaa ttgtatttta tttttttaa  
140341 tattagctta aaaactgata ttttcaaaaa attgtatcat atcatcacta atgcagataa  
140401 gatcgatttg aaaatcattc aaaatcccgt gttttaattc ataaaattct atggttttta  
140461 aaattctttc atatttttta atatttaaac gtcagaaac ttcataattg ttttgagtaa  
140521 atttaacttc gataaaatgt aaaattccat cttttctcgc aataatatca atctcgccga  
140581 atttagaacg aaaattacgc tttaaaattt caaatttttg cttttttaaa aattcgcaag  
140641 ctttatcttc gcctaaaatt ccactaagat atgatgcaaa tcccattatt cttctatacg  
140701 catcataaaa ggcttagcct tgataaaatc ttgtttttcc aagatagaaa gtaaattttg  
140761 aatacttttt tcaaaggat gatgagtatg aaaaaataaa gtgctataaa tttcacctg  
140821 ttttggtttt tgcaaaaagc tgtctatcga aatattattt tcaactataa gttgagtaat  
140881 tttagataaa acccctgttt tatcttctac ttttaattct aaataatatt ttgtataaat  
140941 ttcatccttg tttaaaagtt taaaatttaa attattttca aagcccatca taggacctt  
141001 gggttcattt cttgctatat ccataagatc agcgataaca gcacttgctg tagcatctcc  
141061 tcctgcacc gctccataat aaagactttc accaagtata tcaactgacta tgctgatagc  
141121 attcattact ccatcgactt ttgctatcat tttatcttta ttgatcatag taggatgcac  
141181 tcttaattct actgtggaat tttgagcttt ggctatacct aaaagcttga tagtaaaatc  
141241 aaattctttt gcaaaaatac tatcttcagc agaaattttg ctgatacctt cgattaaaat  
141301 atcttcaggt ttggcacgca aaccataagc aatacttgct aaaatcaaaa gtttatgtgc  
141361 agcatcttgt ctttctatat caaaggttgg atctgcttct gcataaccaa gctcttgtgc  
141421 ttttttttagc acatcatcaa aatttaaac ctactattc atagcgctta aatataatt  
141481 gctcgtgcca ttgagtatgc cttcgatact taagatattg ttcgactaa gcccttcttt  
141541 taaggctttg ataatgggaa ttccaccgc aacacttgct tcataaccaa aagttgtatt  
141601 tttagccaac tcttcaagct catagcgatg ataagcaagc atagctttat ttgcagtaac  
141661 tacaggtttg ttttttttaa gaatttcgct gatgatttta aaaggtgttt caaccacc  
141721 cattaactcc acaaaaacat ctatatcatc tcgttgcaaa atttcatcta catttgtaac  
141781 gatagggatt aggggatttt ctttttgct tttggcaaga gcaataacag gaatgatatc  
141841 ttgtccacat cttgcacgaa tgatttcttt gttttgaatt aaaacacgag caacagcact  
141901 ccctacaacc ccatatccta aaatagcaac tttcatttta ttcttctttc aagtattttt  
141961 taatattgcg cgcagcctga cgaatgcggt tttcattttc tattaagca attcttacat  
142021 attcatctcc tgcttcacca aagccgatcc ccggactcac tgctacttca gcgtgctgta  
142081 aaagttgttt tgaaaattct aagcttttta gatgcatttt gctttcagga agttttgcc  
142141 aaacaaacat gctagctctt ggtttatgaa gtttccaacc cgcattttca aatgcttcta  
142201 gcaagatatg cattctttta tcgtaagtag cacgaatttc atctacacaa ctttgatccc  
142261 catctaaagc tacggttagca gctacttgta taggagtata catgccataa tcaaaccatg  
142321 attttatctt ttttaagagca gctactaagc gcttattttc tactgtaaat cctacagcc

142381 agcctgccat attgtaagat tttgaaagag tgtaggtttc tacggcaaca tcttttgcac  
142441 cctctacttc taaaatagaa ggggttttat aatcatcata ggttaaacc gcataagcaa  
142501 tatcagaaat gatataaaat cgctcttttt tcgcagttgc aactaatctt tcataaaagc  
142561 ttttttcgca agttaccggt gttggattgt gtggaaaatt taccactaca tattttgggc  
142621 gcgggatact ttcatgcagg gttttatcta aatcttcaaa gaatttattt tcatcaagtt  
142681 caaatttttc attatatttg agaggcattt tagccacatt tcctcctgct atgataaaag  
142741 cttgagtatg gataggataa gctggagctg gtactatggc aacatctcct ggattgataa  
142801 tcgctcttgc taaattcaca aaaccctctt tagaacccat agtcgctact acttcatttt  
142861 caggatctaa atttactccg tattttcttt tataccaatt gcaaatagct aggcgaagct  
142921 tataaatccc catagaagta gaataacctg aagttttgtc tttattggcg ctttcgcaaa  
142981 gtttatcaat gatatgttga ggagttttac catcgggatt tcccatagaa aaatcgatga  
143041 tatcctttcc agcacgtctt gctgccattt tgatcgcatt tacttctgca aaaacataat  
143101 ttggaagcct ttctatggta ttgaaacgaa tttcatcaaa cttttttctt cttttttatt  
143161 tttttagggt gatttttaaa cctcttcgga tattgtctaa attatacata tcgcttacia  
143221 ttgcataaac tgcaccgctt gggataagct ctgaaaaatg attattttga gcttgactct  
143281 tgattgcttt aatgagattt aaatttttat ctaaaaatag tacttttagga aaccaaaaat  
143341 cagcatcgtg cgcatcaata atcaaatcag aagccccttg gagagtgaac acataatctt  
143401 taagcggctt ttctaaagtt tgtgtagaat taagttttaa atcgatattg gtattaagct  
143461 gagcattttc aaaatttaaa tcatactcat aatcataagt acctatgctc ttaatattgt  
143521 ctatataaac tgaattatct tttaaaagac tatataaagc acctggatct aaaatgtatt  
143581 gagattctac ttgtatgggt tagtctatat ttccatcgcg taaaatcata tcagtaggga  
143641 taaaatatat atatccaaga tttgtaagtg cgtcagttaa gatcttaaaa aatacaacag  
143701 aatccgcttt ggctttgaaa ttgagcctta aagtttgagg gtctgatagg gttagggtga  
143761 ttaaggaatt ggtttttaaa attcttgaaa ttttagctat gtctggattg cttttattgt  
143821 caatatagct agaatcagga aataaaaagac gcaattgaga atctttagaa ggattagcaa  
143881 ctaaattttt agctaattct aaactagaaa cagcaaaaac agaattagct aaaaataaaa  
143941 aaataaagat tttttttacc attctttacc tttgtttaac ttcataaatt cagctgccga  
144001 aatacttgta atttttccat ctttaataca aaagcgcttt gaatttcccg caggaaatft  
144061 ttgttctttg ccattttcat caaaaacact taaagccgca gctcctgtta aaaccaaacg  
144121 atttacttct aaagaaagat taaaatcatt ttcttttaca agaccagttt ttctataatt  
144181 tgataaatca atcaagccta tccaaatftt acccgaagct ttaaaatgtg cctctttatt  
144241 gggagctttt gtaagttctg tgacttcttg atttgtcgtt gctaaagaat catttgtgct  
144301 taaattttct tctttggcat ttgtattgtt ttgctgggta gaaatttgtt ttatttcttc  
144361 ttttgtattg ttaagttctg tttttgtat ttgagttaaa ttggcttctg tttcgttttc  
144421 ttcagcttga ttatcaatca caacgacatt attttctaaa gcttttaaat tagattgtgc  
144481 ttgtccgata atatctacia cggccgcact tgagttattt tggctatttt ggaaaaaaga  
144541 ttaataataa tcaaaataat aaattccaaa acccacaagt gctaaaatta taactataac  
144601 tataaaaagat acgaaacctg ttgacttttg agtataagca tctaatttag gggttattat  
144661 cttaggtttg gctgtatcgt taagattgtt ttcattgaga taggtttcaa attcttcatt  
144721 aaaatctgta aaatcaagtt cgtattcacg acttaaaatt tttacgaaac cgcggacatt  
144781 aaaacgattt aaagtaacaa aatctttttt aactaaagct tctaaaaaat ctaattcgat  
144841 ttttgttcta gcagcaactt cttttaaatt taaatcttca attttttcc aattaagcat  
144901 ttatcatcct atcacacagt attgcaaaaag ctacactaac attaaggcta tcgaaattat  
144961 ttttcatttc tatgcctaca cattcatcgc atttttttat tatttttagca cttaatcca  
145021 aaccttcaact tcctaaaatt aaagcttttt tgcctttatc gactttataa tgatgaatft  
145081 gtttgcctcc gctcgcactt gcaaaaagtt taaatctac ttgcttaagc tcatftaaaa  
145141 cggtaaaaat atcattattt aaggcgattt caagatctag tgccgctccg ctacttgtgc  
145201 ggataacgcc ttccatcgcg agtctttctc cgataaaaaat aagcccatcc actcctaaag  
145261 cataagctgt tcttacgata gctcctatat ttccaacatc actaatacca taaagaatag  
145321 ctataaattc acccttttta agagtgtgta aatctftaaa ttcatactct ttaatatcta  
145381 gcaaaaagcc ttgatggttt ccacctttag cataagcttg ggctgtftta aaatcaagtt  
145441 ttttgatctt aaagcctgaa ttagcaatct tftftaaaagt tctfttgtcg cactctftag  
145501 ctaaaataaag ctcatfttata agctctfttat gctgfttctaa aatataaaaa aatattctgtt  
145561 ttccataaac tatcattcta aattfttacct aactfttgact taaaagcagt tftftgataaa



145621 tttcttttgg attttttcca ttcatttttg ccaaagttt gctttttggt tttaaaggta  
145681 tttcaagctc taaaatatcg ttttcacata aagaattacc aatgctatct ttatcgtttt  
145741 tagctagcac gacaaccac tcccccttta aatttgtctg ttttaataata tcaaaaagat  
145801 ctatagcttt ggctttaaat ttggtttcaa attttttaga aatttcttta atggcaaaaa  
145861 tttctctttg actatctaaa atagctattt gctcgattaa agacaagatg cgtttagggg  
145921 attcatagat aatgctagga taggtatgat tgagtatctt ttggatatct ctttggcggt  
145981 ctttgccttt attggctaaa aaaccataa aaataaattc tttttcgcat aaagccgagc  
146041 ttacaagtgc caccaaggct gcattagcac caggtaaac ttcaaattgg atatcatttt  
146101 ttaaagcaaa atcaattaaa aattgcccag gatcactaat tcctggcata cccgcatcac  
146161 ttaaaaaagc aatatcttga tcaaaaaatt ccaaactaa attttctaaa actttttttt  
146221 cattatgagt atgaaaggat atgaattggt tatcgccaaa atcgatttca aatttagatg  
146281 aaagtaaaga aagtaaagac ttgctcacc ttgtatcttc gcaaaaaaaa acattgcaag  
146341 tctttaaaag ctctaaagca cgaagaaa tatcgcttaa atttcctatg ggcgtaggaa  
146401 taaaataaag cataattatt gcattgcgta ttttttctta aatttctcta cacgacctgc  
146461 tgcactacg attttttcac tacctgtgaa gaaaggatgg cagcttgaac aaatatctac  
146521 tcttaactca cttttgtttg atttggtaac aaaagtattg ccacaagcgc agctaacttt  
146581 gcattctaca tattctggat gaatttcttt tttcatagct ttttcttaa aaataaaaca  
146641 ataagcggtg attatattaa atttaataata aaaaaacat taatttaagt aaaattaaag  
146701 caatattttt gcagccactg caacgacagc actttggctt cttaaatat taggcacttt  
146761 aaggcaatt ttttcttaa acatttgttt ttctttgggg cttaatccac cctctggccc  
146821 tataaaataa agccgagttt tatcaaattc ctttatttca cttcaaaat caaccaaaac  
146881 agcatcagga aaagatttgc taaattcttg tatattttta tagctttgaa tttgcatttt  
146941 tcgacttctt ccgcatgttt cacaagatga aatgataatt ttttctaate tttcaaaatc  
147001 aagtttaaaa tttctttgag aaaattcagt aaaaacaagg tgtaaatttg caactccaag  
147061 ttcattttaa aaagggagt ttttttctaa aatttttgta tcgataactg ccaaagctaa  
147121 attagctcg ctttgtgaat ggggctttaa atgtttattt aaaaaataaa gcaacaaga  
147181 attacggtcc aaatttgaaa ttttataatc ataaataaaa tcatcttcta aatttcttaa  
147241 ggataaaatt tcattttctt taattcttct tgctttttaa tgggcaaat cttcgccctt  
147301 aagttttaa atttcctctc ctgcttgttt gtggtataaa aattgcattt ataaatattt  
147361 gcctgttaa aaaggtaaaa ttaaaaggac aagttcgcaa aataaaatca taaaactaat  
147421 gcgtctaaaa gttatatagc gtcttaatct acgagctttt ttaaatttg tgaaatgaaa  
147481 aatagctaaa gcaaaaaata aaatccaaga aaaaatcatc aaccaaaggt ttaaatgcat  
147541 ttgaaattgt ttaatggcta aaagcaaaaa gcccgtaaag agcatcaagg ctaaaaaaac  
147601 atagtatata ggtaaaaaca aacgaattct acggataaag ataaattcgg ttttaaaatt  
147661 tccttgagtt aagacaagat aaaaaagcat taaaaatcca ctagcgtaa gactataaag  
147721 gtgtagggct aaaaaaatt cataactttt gtccatttat tactccttgc cgatatattt  
147781 tgctaaattt tccctttggt cttgggttaa aaaattatga gtttcatctt ttaaattttg  
147841 aagcttttga ataaattttt cactgcttaa atttttaatt gctatgcctt ttttggtttt  
147901 aatttctcct ttttctccat ggcaagtggc acatttttgc ttgtataaag aattaataac  
147961 acttggattt atgtcgtatt cttcaccaat attagcctca tcatcaactg gtaagggtaa  
148021 attagtatcg ctaaattctg ttttttcatc attttgttca atttgcacta tctcttcagt  
148081 agtatcttgg tttttatgat tgaattcttt atcattacta caagcgttta aaaataaaat  
148141 tacaataaag cttatataaa tacttaagtt tttaccatt aaacctcctt aggatttgtg  
148201 aaaatgtgca aattttttta tttatcgtaa aattctatat cgctccattc tgcttttata  
148261 gcaggtgaaa attctatatt ttcaagtgcg atttttggca tggtaggact ataagcatct  
148321 tctttaaatc cttgtgcata gcctgttctt gtttcatgta ctataatgct ttgcaaat  
148381 acacttgtt cgccatttat catcttagtt tgctttaata aagcatcgat gagtataaaa  
148441 aatactcggc aaaaattttc agcactgaca ttaacaggca aactcacca gcgttgtgag  
148501 tattttttca tttcgtttta ataagattca tcatcttgat taaaaagcgt aatagcatga  
148561 tcaaagctat cgataatttg gcgcatatgg gttttttaa gcccagtc ataaaccata  
148621 cccgcattat ctaaatactt gctttcaagc aaaacttcca cttgtaaga atgccatga  
148681 aatactattt tacaacggct tgaagagcaa aatctaaca tatgagcatt ttcaaattca  
148741 aataattttc ttataatcat acaccctctt tatcattcca aagacgaata tggattctat  
148801 cagaataatt ataaccattt ttaatacaaa actcggctat ttttaaagca ttttgtttta

148861 aatthttgctc atthttctccc atgggcatac aaaaaatthtc attaggcgct thttctaaaa  
148921 thttctaaaa ctctaatgcc gaactthtcta attgactaga atthtaaaaca aatthtataaa  
148981 aactatcttht ggcataatgc thaaagcctt taagagcgtht aaaaatthaat cthttthtctt  
149041 tactthtccc actatthttga agcttgacac thagagcaaa aatacattct thataaaaaag  
149101 gataththttc aaaaatcaagt tctatacttc cattgcttht aaaaatgcact thgaaattat  
149161 thttctaacia agthttggata aaatggataa atthctggatt thcatgatgg atthaaaggtht  
149221 cgcctccagt aatcaccaca ataggatcaa aatctthttt thaatcaagc acgctgthta  
149281 aaagctcatt agcattthaa thttcatact cthctgthtaa thctthtagta aaaaactgctc  
149341 thatggthtc gcaaccttht agagththtt cattththaat aagththtacc ccaaagccta  
149401 aacaathtaa attacacct gcaaaaagca thaaaaatagc thaatthccc cthgtatthtg  
149461 cthctccttg thtgctthaa aactthtcaa caagthgcaa atthtaacct cggthttgata  
149521 aaaggcacga gatgaggtht cattatctac thagctccat cthgtthttt caggthttatt  
149581 gcgcaatact thcttgthaaa thttthgcagc ggcathtaata thcaccttht thcactgcttc  
149641 ththaatgctt aaagctthcat caaaaataag acaaggtata agthaagcctt cagcgtthta  
149701 acgaatacgg thacaagaat cacaaaatth atggctgtgt ggatctataa thccaaatthc  
149761 ataathcatct gcaactataa thactthacagg agctththtca gctthththta thgagththtath  
149821 thgataththt thgactthagaa ththgtatgat thcatctctt ththaagcctt gthaaththtc  
149881 ataagcgtgt athaththtcaa thaaathctath aaagcgaath thgaaththth thagaththtg  
149941 aaththcaaaa agagathatca athcatctac atthtaaacct ththagcaaaa cagthattthg  
150001 ththgacttht aagctthcat thaaaggctc atcaathcct gthaagacac ththctaaaa  
150061 athctththgt gcgagagtht thgctththth gctththctagg gththcaagag agathaththaa  
150121 acgctthcagt ccagcathctt thagathctth agcaaaaatct ththaataaaa aacctthggth  
150181 thgathattgct aathcaagath cththththata athcaththtath atthththataa athathctthaa  
150241 gctththacgc aataaaggct thctctccagth gathacgaath thththcaath cththcatcaath  
150301 agccacttht acaaaaacaaa aaagthctthc aaagctcaath aathththctt thagththgatg  
150361 aththaaagga athththggca thacaataaag acaacgaaaa ththathctth thgagththctga  
150421 ththcthaaga thaththaatct thctgccaath ththathcaata agcaththata cctctagthga  
150481 thaththgata agththththaa atthththaaac aagctcgaca ththccagthgc ccaathacgcaa  
150541 athctththgca aththgctctath thgctthththc thctththaaac aaththcaaaa ththththgthc  
150601 thcggtathca thaththggthg thathththgt cathctththgt gctthththgth ththaaathcaa  
150661 aathacgathth thgthththcat ththgaaaath thctthataath thgctccathg ththththaaagth  
150721 thctthaaaca ggggthathth ththgcaathg thththththca agthththgathth gathththctthc  
150781 thththathaga gthgathththath aathctctthc thctththgathca cctctathctt ththacgctthaa  
150841 thctththgctg aathaththgaa gctctththgt aathathctthca actathctctt ggagthththgt  
150901 ththththgca ththctththctt thathctththgath atthcatthata gthaathaththg caacthaaaag  
150961 thagathcata aaaaacthaath aaagcathctc gththctthcath ththgthcttht thaththctthaa  
151021 thcathctctct ththgcaaththg accacaathaa ccaathaaagc ththctthgthct thcggtthththaa  
151081 thththgathaat ththgagcthaa ththththththth gagctctagc aaaaathagcc atththththgath  
151141 thaththagathc aathctththg thathathctth thctthctthc thaaathththca thcthaaaaaath  
151201 ththaaathactc aaaaaththaa gaththcaacth cgcctthththg thththgagthgt aaaaagathctt  
151261 thththththctc caaagathctc thcaagthctth aathathctthc thththaaagctc aaaaagthaaath  
151321 caaaaathgath ththctcgccc thathcaaaaath ctathacgcaa ggcgagththt thctcathththg  
151381 aaagththgaga aathggcathct aathththaaagth atthctthgthaa aaagthggthth thththcaathath  
151441 cacathactc thaaagathgct thcaathctctg cththaaathaa gctththctctc athagcaathctc  
151501 aacccaathaa aaaaathaaaa athaththathct thaaaththctca thththaaagthaa aaaaagcttht  
151561 athcgathgthga gcaaaaaththt thathgthcaath ththathgththca aaagccaathaa thathaccgctc  
151621 gathathctacc ccaagthathg cthathaththctc aagthgctathct cccaathactc gccaathcaaaa  
151681 aagthagccaa acaathactg thathathathg acaaaaagcc gathathaaath atgthctgcttht  
151741 agagccaath ththagcaggha thgaththgag cccathcttht thathathactc ccaathathctthg  
151801 thaaagathaa agcaagthcaa athctcagcctg ccaaaaagthc acccthaaac athaaathctc  
151861 gcthaathaaagth thgathththcac ccaathactath cacathctctc gcaathagghg caagthctthaa  
151921 acaaaaathctc aaaaaccaagth gcgcthaaaga acthaagcctg ththaaagcag agthaaaththg  
151981 thathathaaaa agcathagghaa aagathgathaa aaaaagccaath gthaththgathaa aathaaagaca  
152041 tacthaaaaa athaththgath thagghathgath aaaaathctca acgctthththg gthctaththt

152101 tccactgaca ttagggcgat ttgcacagcg aggattgtct ttatcgatat cttcatccat  
152161 taaacgattt gttgccatag caaaatttct tgcacttaca gcacaaataa tacctaaat  
152221 caaagcctta aaaccaaac aagcgctatc attaacgagt tttgatgcca ctatcataga  
152281 tgaaaataaa aagggcaagg caaaaataga atgcttaaat accacaagtt ctaaaatatt  
152341 tttaaattta ttccaaatta tattcatggt tccactttaa aatatttttt gctatgattt  
152401 tactaaaatt ttcataaatt ttaggataaa ttatcacatg ttttttcaaa tcgcacttat  
152461 aggaaccaca gccagcggaa agacttatat agcaaagcc ttagctaaag aattcaatgc  
152521 agtggtttta agccttgata gtctttgtgt ttataaagaa atcaatatag ctaatgctaa  
152581 gccatctaaa gatgagctta tgaattttaa ttactttgga gtaaatttat taagcgttga  
152641 tgagcatttt aatgtagaat tgtttataag agaataccea aaagcaaaag aatttgctct  
152701 tatgaatgat ctacccttga ttatagtggg tggaaacaggc ttttatctaa aaacgatgat  
152761 agatggttta agtcaaaaaa ttcaagatac aactagcatt ctaagtaatg atgaaattta  
152821 cactcttttg ttaaaaattg atccggctta taaaatagaa aaaaatgata cttatcgtct  
152881 tagaaaatgg ctaagcattt atgaaaatac aaaggaaatt ctagtgattt ttttaaaaag  
152941 aacacaaaag gatggagtgc ttaaggatat tgaattttac gagcttgatg gggatagggg  
153001 aattctaaga aagcgcatag aagcaagaac aaaagaaatg attgatagtg ggcttataga  
153061 agaagcaaga atgctttttt caaattttga taacaatctt aaagcattaa attctatagg  
153121 gcttaaggaa tgtaaagagt atttagaaaa taaaatttct ttaaaagaac ttgaaaattt  
153181 aatcaccata catacatcac agcttgctaa gcgtcaaaga acttttaata aaaaattcca  
153241 aagcactcct ttggaatttt ctaaagcttt aacactactt agaaataaat ttttagctaa  
153301 aaaataaatg ctcaattaaa atttttatcc ccaagattat caaaacagct cccctaaaa  
153361 attcagcttt atttttaaag cgagtgccaa atttattgcc tttttctaaa gcaatagcac  
153421 ataagataaa agtaatagaa cctattaaaa atagtgctaa aaataaatta acatctaaaa  
153481 aagcaaaact aactcctata gctaaggcat caacgcttgt agctacagct aaagcaaaac  
153541 taatttttaa gccgaattga tttgaaatag tgtcgcaatt ttcattctca aaagattctt  
153601 taatcatttt tagaccgatt aaagagagta aaataaaggc tatccaatga tcaataactg  
153661 cgataaagga tgcaaaagtt atgcctataa catatccaat ggctggcatt aaagcttgaa  
153721 aaccgcaaaa ataagcccct gtaataacat agtgtcttaa atttagtttt ttcacactaa  
153781 atcctttaca caaagataca gcaaaagcat ccatggctaa tgcacaggat aaaagaataa  
153841 gactgtaaag atccatgatg actcctatga aagatgtaaa agttgagaat tataataaaa  
153901 atttcttaat taattttttt gatgaaacta tgattaaaaa tttatagcag cggattgtat  
153961 ttaattaaac ttttaagaata aaaaatataa aattcaactt cttttttatt tttactcctt  
154021 ttaaaagtgg cccattcgtc tagcggttag gacatcgccc tttcacggcg gtaacacgag  
154081 ttcgagtctc gtatgggtca ccacttaaat ctttttttat taatatttcc aaactttatt  
154141 tacagatagt ttttaattc tatttaatgt ttattatcgc ttttgtaaaa aatagattta  
154201 taaatttgta agaattttgt ttgtagaatt ttattttatt aaaatgatga ggattgataa  
154261 ataaatgagt tatgatacaa attttttctt attatatttt aaagataagg ttccaaagga  
154321 ttccttgatt tttcttaagg aaagtttaga aaaagcaagt gaagaacaaa aagaaaaact  
154381 tttatttact aaactgaaaa atcccctata tggactttta tttgcttttt tgtttcctgg  
154441 tttggataga atttataatg gcaatataat tttaggataa cttaaaatca tatcagtaat  
154501 acttgtttcc atgggtttgg taatagcaga agataaaaac gatgaaagca ctatgctgat  
154561 ttttataaat ttatttttca tactaagtgt ttgggtgatt ttggattatt ttttggtatg  
154621 gaaagatatt tgtcaaaata atcttaaaaa aatttttgaa gttttacaat gaagcaagat  
154681 aaaacgatat tgctcatatt taaagataag attcctcaag aaaggctatt tatcttaggg  
154741 gaagaattaa aaaaaagcca aaaagatcta agtgctcttt atgctatctc tcttaaaaat  
154801 cttttggttg gccttgattt aagtataact gtgggattat ttggggttga tagattttat  
154861 aagggcgata tcttgtttagc ttgtattaaa ttggcttttt ttataatacc tttatttgct  
154921 acttttgctg cttttatagc attgttaaat aagagccatt cgatttttat agattatttt  
154981 gctatttttg ctttaatggt tgttggtgct agcatttgga agcttggtga tatttatctt  
155041 gtttttggtg gtattaaaaa agataatttt tataaaattc ttaactttct ttcttaaaaa  
155101 atatcttgaa aatttaaaga agtagttaa gactttctta gtctttttat ataattttta  
155161 tgctacaata ttttgtaaaa cttactaaat taaaggagaa aattatgttt gaattaagaa  
155221 aattaccta tgataccaat gcttttggtg attttttaag cgctgaaact tttagctatc  
155281 atcatggaaa acatcacaat acctatgtaa caaatcttaa taatcttatc aaagataactg

155341 aatttgcaac caaagatcctt gtaagtatta tcaaaagtcc aagtgggtgga gtatttaaca  
155401 atgctgctca agttttataat catgattttt attttgattg cattacgcca aatgcctgtg  
155461 aggtaaaagg cgatattaaa gcagcttttag aaaaagaatt tggctcttta gagaatttca  
155521 aagctgaatt tatcaaagga gcaacaggag tttttggttc gggttggttc tggttagttt  
155581 ataatactaa aaatcaaaaa ttagaatttg tgggtacttc aaatgcagct acacctatca  
155641 ctgaagataa agttccttta cttgttgtgg atgtttggga gcatgcttat tatgtagatc  
155701 atcgcaatgc gcgtcctgcg tttttgaaa aattctatgc tcatattaac tgggaatttg  
155761 tagcaaaagc ttatgaatgg gctttaaaag aaggatggg atcagtttagc ttttatgcaa  
155821 acgaacttca ccctgtaaaa taatacaagg catcttaaaa gatgcctttt ttactctcct  
155881 aaacttggag tcatttcgat aatcttccat ggaagtcctt gagaattaag ctcatccata  
155941 aaaggttttg cgtcaaattc ttccatatta aatacacctt ttccttgcca aattccttta  
156001 gcgattagtt ttgtacctat catcgcagga actcctgtag tgtagcttac tgcttgcgcg  
156061 ccggtttcct tghtaacattc ttcgtgattg caaacattat aaatataaac ttgtctgtct  
156121 ttaccatcct ttacgccacg gattacacaa cctatattgg tataacctt tgtgagagga  
156181 cctaggcttg caggatcagg aagtagggtt tttaaaaatt ctataggaat gatttctttg  
156241 ccttgggtgca taacagggtt tatacctagc attccaacat tttcaaggca tttcatatga  
156301 gttaaataac tttgccaaa agtcataaag aagcgaattc ttttcaaac tttgatattt  
156361 tttactaagc tttcaagctc ttcgtgataa agcaaataac tatcttttac gcctacttca  
156421 ggataatccc attccatttt ttttccata ggttcggtt ctatccactc gcctttttcc  
156481 cagtagcgtc ccttagcaga aacttctcta agattgattt caggattaaa attagttgca  
156541 aaagcatagc catgatcgcc cgcgttacia tctaaaatat ctatgtaaga aatttcatca  
156601 aataaatttt gctgcgcata agcacaacaa acatttgtaa caccaggatc aaaccactt  
156661 cctaaaagtc ctaaaattcc tgcttcttta aatttatcat ttcttgcca ttgttcttta  
156721 tactcaaatt tagctagatc tggatgctca tagtttgctg tatcaacata atcaattcct  
156781 gcttttatac aagcatccat caagcttaa tcctgataag gcaaagccac attagtaaa  
156841 atttgcgccc ctgttttttt aataagctct acaaccgcat cgctatcatc tgcatcgatt  
156901 tgcgcagttt gaatttctac tcctagacgc tctttgataa agctagcaat ttcatcgcat  
156961 ttacttttgg ttctacttgc tagagtgatt ttactaaagg tatctgaatt cattgcgcat  
157021 tttacggtag ctacgcgact tactccgcct gcgcctatga ttaaagatt tttcattgat  
157081 tgtgtcctta aagaaatttc aggaatttta gctaaaaatt gataatatca aaatttattt  
157141 tttcttttag cgggtaattt gagctgagca acataaaaaa ctctatattt ttatatctta  
157201 ctttgagtct ataaaaagct cctaaaaatt ctttttgtaa gattgtagct tcaaacgat  
157261 ttcctatttt aagttctgca tagccaaaag tataattttt tgaagcgatc cactgaaaaa  
157321 attcatcttc taaatcaagt tcttcttcta tgatatttaa atcaggtaaa attctagcac  
157381 ttttatgatt aggcttaaaa taaagctcct taggatctgc atgagctaga atttctcctt  
157441 tatcaagaaa ggcgatttta tcagacatgc aataagcatc ctcgatatcg tgagttacca  
157501 taatggctgt aattttttgt ttttgatga gtttttttag ctctcttctt aagtcttgtt  
157561 ttaaattctg atccaaatta gaaaaagggt catctaaaag taaaagctta cagcctcttg  
157621 ctactgccct agcaaaggct actctttgag cttgtccgcc tgaaatttca tcaatttttt  
157681 tatacttaa attctcaatt tcaaagggtt ttaacaaatc ctctaaaatt tgttttttat  
157741 cttttttatc atagagtgca aaaagtatat tttttcaac atttaaatga ggaaataaag  
157801 cataattttg aaacatcatc gccacttcac ctttgcattt taaaaattca taagagcttg  
157861 cttgttctag ttgggcaatg attcttaaaa gtgtactttt accacttcca ctccctccta  
157921 aaatgcttaa aaattctcct tctttaacat gaagattgat attttttaa gcttgtattt  
157981 tgccaaaatt ttttgataag tttttaattt ctaacatcat ctttcttgtt gattttatcc  
158041 atccaaataa cgactattaa agaaagtaaa acaatgagta gtgaaggtaa agcagcatca  
158101 taaattctct catcacttgc aaacaaaaa gcttttacac ttagagtttc aaaacaaaa  
158161 ggagctaaaa ttctactcaa aggaagttct tttatagtat cgataaaaaa aatgataaaa  
158221 gccaaaaata aaaaatgttt cattaaggga gtatgaattt taaaaataa gatcaaatag  
158281 ctaggtctta aatttaaact cgcttcatct gtatttagat gaattttatt ataaccctt  
158341 tccaaagaat aaatcgcact cgctagaaaa cgaataatat aagcaaaaaa taaaatgatc  
158401 aatgaagtgc ctaataaatt aagatgaaaa attttatcta aaaacacaaa aaggacaatc  
158461 atgctaattc ctaaggcagc tgcgggtata gaataacca aagaacttag cttagaata  
158521 cataggctga aaaagttatt ttttatgatt cttgagctaa acattaaaaa ataagccagt

158581 aaagtcgtaa tcaaagctgt gatgaaagcc aatataatgg tttgaaaact aatgatataa  
158641 aattctgttt caaaaagttt aaaatctttt aacccccaat aaacaagcca tataaaaggc  
158701 aagataaatc ctaataaagc gatgataaaa caataaaaac aggctaaaat ttgctttata  
158761 tgacttaatt ttcttttttt gataaaaaga gttaaatttt gattaaaact ataatgatgc  
158821 ttgtttttat aataataatc tatatacatg attaaaaaaa caaaaatcat caaaattcct  
158881 gataaaatac tcgatgaata agaatcattt aaatcatacc atagttttaa aatccctgcc  
158941 gaaaaggat ctactcccaa ataagccgaa gctccatagt cgcttaaagt ttccatcaat  
159001 acaagcaaag ctccagaaaa aatagcaggc cttgcgctta aaagcatgac gcgtgaaaaa  
159061 attctaaatt cagaataccc catgatttta gccacttcat aagcttctat ggcttcactt  
159121 ttaaaagcgg ttttagcaaa taagtaaata taaggatata aagaaattcc taagacaaaa  
159181 ataaccatc aatggttgaa aaaatctatc ctaaaaccaa aaatttcatg aaaaaagcct  
159241 tgaaaatcca taatcccaac atatacaaaa gctaaaatat aagcaggat tgccaagggt  
159301 aaaataagta atttttctaa aatcctgcaa aagtaaaaat tataatttgc catcaataa  
159361 gcgctactta cacctaaaat caagcttagc aatagcactc ctatgctaac tatcaaagta  
159421 tctttgatga attttaaaaa caaataatca aaaaaatgac tcaaattttc tttaatagat  
159481 gaaatttcag ccaaatcgct tgtattgaaa ttttgaaaaa gaatataaaa aagctcagca  
159541 aagataccaa aaataggcag ggtaagaaaa agggcaagta aaattgcccc tatcttgtaa  
159601 tactttaggg ttttaagcat tatctaaaaac cgacttgatc ataaatttta accgcttctt  
159661 taaccttttc tgctatttga ctcacaggta tttgatcttc tttaaaagtt caaaatcct  
159721 ttactgtttg gcttaattct acatcatttc ttataggaaa ttcataattg ctatcagtga  
159781 gaattttttg tatttctgga gttagcataa attccataaa cttcttagct gcttcttgat  
159841 ttttgcttga ttttgtcata gcaataccgc tgatatttat atgagttcct ctattgtctt  
159901 gatttgaaa aataatacct aaagaatttc caacttctac atcttttgga tttttagaat  
159961 tttttaaag tcctatataa taagtattca taacagcaaa tttagcctca cctgcaaaaa  
160021 cttgtctagc ttgatcccta tctccaccct ttggtttggg tgcaagattg tcaagcacac  
160081 cttagccca tgcttttagca ttttcatctc catcattagc tataatagaa gctaaaagag  
160141 ttttgctata aggagctgta gcacttctca taacgatttg ccctttaa atcaggcttag  
160201 ccaaactctc atagtttttc attttgctaa tegtcaagtgt tgcattttta ttgtaagcaa  
160261 taattcttgc tctttttgta atcgcaaac attccccatc tttatctctt aaatgagcag  
160321 gtatagtatc ttctaaatat tttgatttaa cagggcttaa aagtccagaa ttttttgctt  
160381 ctgtaagatt ggaaatatct gctgtgatga aaatatcagc aggcgaattg cttccttcaa  
160441 gcgaaagtct tttgatgagt tctgaagctt tagcttgagt atgattaact ttaatgcctg  
160501 ttttctcttc aaattttttt ataatctgaa aatcagcatc ataatgtctt gccgagtaaa  
160561 tgtaagttc tgcagcacct agtaaagaaa aacctaataa acataaagaa aagatttttt  
160621 tcatttattt gtccttatat tgagaattat atttagtttt atcatgatct ttaaaatcag  
160681 cattagagtg ttcagagcac gcaaatgcaa aacctaagca aaataaaaat aaaactaatt  
160741 ttttcattat ttctcccctt ttttgtgatt aaaattagac taatttttga taagggatat  
160801 taatattaaa aagtaaatat aaagtaattt aatgattttt ctaatgataa gtattttcat  
160861 tttattataa ttaattttga tattaattat aaataattaa atttaataa aatatttaag  
160921 agtattttta tatataaaat attaatattc aatatcaaaa ataaaccaca aagaaagtag  
160981 aaataataat gaaattttat accatgttaa gcacattatt tataagcttt atgttaagcg  
161041 cttgtgctgt tttgcaaaaa ccatctccac ttcaagaaaa caaagatttt tacatactta  
161101 ataccacac tcaagaaaaa atttcttttg aagatatgat tttagaatta ttaaaagcag  
161161 atgtgatact gcttggcgaa aaacacgatg aagcaaagca caagataagc caagttatga  
161221 tttttaatgc cttagaggga aatttaagtt ctcaaaatat aagttttgat gtagctttag  
161281 aatgctagc aagcacagag caaaatcact tagataaagc tttcaaaaat aagaaaaaca  
161341 ttaaggttaa tgaacttgcc aatgcactaa attgggataa gggttgaaa tggaaagatt  
161401 atgatcaatt tgtaaatgca gttttttatt caagagcaaaa aatattaggt gcaaatcttt  
161461 cacgctcgga aattacaagt atttataatg gagttcagcc tttaaaaggt tatgtttcaa  
161521 ccacaaatga agtaaaaaaa caaatttttg acattatatt cttagccat aagttaaac  
161581 ctcaagaaaa taaagaattg ctagataaat tagtagaaat tcaacaattc aaagacaggc  
161641 gtatggcaga tgtattagt catcatacaa ataaagtttt attgctagct ggaaattatc  
161701 aactagcaa gaagatagga gttcctttgc atatacaaga ctttaagagt gataaaaaa  
161761 tagtcgtggt gaatttaaat tatgggaagg tagattttaa agatagtgat tatattttta

161821 tttataaggg aggagaatga aaaaattaag ttttaatttgt gttatggggtt tatgttttgc  
161881 taatttttgct ttttctgaag aattagaatt tgatagcctt gaaatttcag gctcaagaat  
161941 caaaaacgat gaaaagcctt ttgtaactcc tggagcaaca agcacaaggg ataatttaaa  
162001 ttcaagtacc caaagtatag attctatagt gcgtagtggt cctgggtgcat acactcaagt  
162061 agatcaagca caaggtggag tttcggtaaa tattcgcggt atgacaggac ttggaagagt  
162121 aatatcccaa attgatgggt taactcagac tttttttggc tctgcaagcg atgatagcct  
162181 ccatggacaa attggaactt caagttttac agccccaata gataaaaatt ttttagtcgc  
162241 ttttagatgtc aatcgtggaa ctttttagtgg ggcaaatgga gctaagtctt taatgggttc  
162301 agctaatttt agaactatag gtgtagatga tatagtgcaa gaaggaagag tttttggcct  
162361 ttttaggaaa tactcttatg gtagcaatgc tataggacct gattttatgg gcgctatagc  
162421 aggaaaaact atgttagaaa ataatactag cttgggcggt ttatttgcct atagtgggca  
162481 aatgtttct caaaattata aaattggagg cggaggttat ataggcgatc aaaaacctc  
162541 tatcgacacc gatgatgatg gcattccaga cgataattta gcagcaccta taaatccaaa  
162601 taatctttat aatcagccta gaagtcaact ctttaaagtg gaatacaaat ccgatattag  
162661 cgaggcaatt ttaaattata gagcttacia gaacaatctt gcgggtagaa agattacaaa  
162721 tgatacctat caaattgatt atcgtttaaa tcctgattct aatcttttag atctaaagtt  
162781 tttattttgct tacaatgatg gaaaacaaaa atataatcaa ggcagcactt ggggttatca  
162841 cgatatgagt ggagttaaga ctaaaaatcg agcggtaact tttgatctta gtaataccat  
162901 gaataaagaa tttcacaag attcaaattt atattttact tatgggggta atattttaaa  
162961 caatcattat agtaatgatt ttccacaaga tagagtgctt ttgccttata ttttaaccag  
163021 tttttatcct aaaggaaaac aagatatcaa aaccctttat ttggatacga gttttacaca  
163081 aggaattttt actttaaatt ctaatgtcaa ttggactaat gcgcaattaa gtggatataa  
163141 aggaattttg agcatggcta atccttattg ccagccaaaa aatgcgacaa atttagaaaa  
163201 agattataat aatttttaatt attctttgat gctttcagca gatatccatc cgctttttaa  
163261 tccttttatt tcttattcta aaagccatag aattccaaat gtccaagagt attttttcac  
163321 ccatgatgca agttttgagc ataatatgaa tacattttta aaggctgaaa gtgcagatac  
163381 ttatcaaatc gtttttaatt cttttacaca tgaaatttta aatgatagcg atactttagg  
163441 ttttaaaatg ctttattatg atactaaggt aaaaaattat atttacaata gaagatattg  
163501 gcaaaaagct gacgatgctg tttttcttat gcagttaaat gatgatgaaa aagctaaatt  
163561 tcacgggggtt gaacttgaat ttaaataatga tacgggattt ttttattcta tactatctta  
163621 tacttatcaa aaatccaagc ataaattttc agatacagaa tctttagaat ttggagggtgc  
163681 gcaatcaggc caaagccaat ttgcccaact tccagagcat tatgctaadc ttgatatggg  
163741 tgtaagatta tttgaagaaa agctaactct aggagctctt gctaaataca caggaaaagc  
163801 aaaaagaata gttcctgtag gtagctttaga tgatgatcca agcaatcctg atgctatggc  
163861 tccgcttaaa actacagatg aattgccgaa aataccaact attgttgatc tttatgcaaa  
163921 ttataaaatt ttgaaaaact ttacaatcaa agcagaagta caaaatttat ttgacaaaaa  
163981 ctatatggat gcactttact cttacaacac aggggaaaac caaatgctg gaggattatt  
164041 tgatcctatt tatatttata ataactctgc tcgcggtcgc acctttatag taagttttga  
164101 atataaatat taaggaaata cataaatgct aaaaaaata tttttatttt gttttttatt  
164161 gttaaattta aatgctgaag tgaatgtaac agatacaaat ttatcttttg attctcctaa  
164221 aatagaagcc gaagtaccaa agatagagct ttccctttct agtctttatc aaaatgctga  
164281 tgaggtggta aaaggcgta tttacatatt ggttttattt tctgttttag cgtgggcagt  
164341 ttttatttct aagcttatgc aattttattt tatgaagaaa aatttagact tctctataca  
164401 caagataaaa gaattaaaa atctcaatga attagatcag acaaaagggt ttgcagggtg  
164461 tttatcttta gaaattcaag atgagcttga aaaaagtgaa tataaaaatg atcatataaa  
164521 agagcgtata gaattgcgct tgcaaaaata catctcaaaa caaatcacag caagcaaaaa  
164581 tggcttgagc ttgcttgca gtataggtgc tagtgcacct tttatagggc tttttggaac  
164641 agtttggggg attatgaatg cttttatagg tatagcaaat cttggcaatg cttcttttagc  
164701 agttgttgca cctggtatag ctgaagcctt gtttgctaca gcttttggtc tggtagctgc  
164761 tattcctgcg gtgctttttt ataattatct tacaagaaaa aatttaaac ttatgcacca  
164821 ttttagatgag cttgcgaatt ttgtctatat actttttcat aggagttatt ttaatgataa  
164881 aaactgaaat agctcacaaa gaagaggagt taagtgagat taatataact ctttttatag  
164941 atattatgct tgtattattg atcgttttta tggctgttac tcctcttatc acaagttcta  
165001 tcaagataga actacctaag agttcacagc aagcagagga taagcttaaa aatcccatca

165061 tactttatTTT aaataccgat aatactttTgG ccattaatga tgataaatta agcctagaaa  
165121 atctttcaag tgctttggat ataaaaacca aaggtaataa agaagaaatt atttatTTTtC  
165181 atatcgataa aagtgtaaag tatgaagata ttatgcaggt aatgcaaaaa ttaaaagaga  
165241 atggctatgg aaaaatagct ctttcaagca aaaaggtgga ttaatatgaa gtctagtgtg  
165301 atTTTTgggt ttgtgtcgag tttggTattg catgctttgg tattaatgTt ttttctTTTT  
165361 tctTTTTata ctcaagaaaa atcaagcgga gttgatttTa aacaaggagt ggaatttact  
165421 tccattatga tggTatcaga gcttctatt ggagaattaa aagaagtTtC aatcgatcaa  
165481 aaaaagagca attctcaaga taaaaacaaa aaacaagatg aaaaaatgag tcttaactcc  
165541 caagataaaa acaaaaaaca agatgaaaa atgagtctta actcccaaga taaaaatgct  
165601 gtattaaaag ctcaaaaaaa gatagaaaag caagatgaaa atcaagccca aaaagaaata  
165661 gctaattgcaa gtgaaaattc aaaattTtaa aatgaaacac ttagtgcTtC actacaaaagc  
165721 aatgaagata aaacacaaac tatagtaagt ggcaatgcta aagaacaaat taaaagTtat  
165781 caagcctTgc ttatggctca tttggctaaa tttaaaaaat atcctcaaga agcgataatg  
165841 caaaagcaag aaggtgtTgt aagaattcgc gtgagtatcg atgaaagtgg aaatgtccta  
165901 agtaaggagc ttaaaaaatc ttgcccctat gcagtgttTa atgatgaagt ttttaagTtTa  
165961 tttaaaagag cttctccatt gccaaaacca ctaaagaaa tgttgaaaga tggcgaaaaa  
166021 attagTTTTg ttatgcctat tgattacaat attaaagact atttaggtaa aaaataaact  
166081 cttgattaaa taaaattgat tagaattTtC gttttgagat taaggcggtg gtatgtTtTc  
166141 ttcgTTTTtTt gcaagtaaaa aatgggcttTt atgggcttat ttggggcttTt ttttgctatt  
166201 gTTTTctTg tatatgcaaa caagTtTtaa tgttgcgatc aattcatggt atagtgattt  
166261 ttataatgTt ttacaaaaac caaaaataga actTTtagat tctaattcaa cacaaaaagc  
166321 acaagaaaat ttcgaaaata atgcaagTtTt gatccaagag gccaatcaaa aagcacaaga  
166381 aaatttcaa aaagctaatt ttatcaataa aggcgcactt tattattatc aaagTtTtatt  
166441 ggaatattTt ttttaattcta gggctatgat tgaaaaagaa agctattctg cgagtgattt  
166501 ttatgctTtTg atTTtagtat tTTtagctat tgctattcct tatgtTtTtaa tcgcaacgat  
166561 taatatttat tttgctagtg tttacgcctt taagtggcgt gaagctatga cTTTTctTa  
166621 tttgaaattt tggaaaaata aggatgataa catagaagga agttcgcaaa gaattcaaga  
166681 agatacttat aattTtTtcta aaattgtaga aagcttagga cttagTtTtTa taagagcttTt  
166741 aatgactctt gtagctTtTta taccgattTt atggactTtTa agcgatgtTg taagcaaggc  
166801 tttattTtgca aattTtaagtG agaattctag cTTTTattTt ttaaaaaaca tcgatggTtTt  
166861 gcttgTtTtat gttgcgcTtTt tgatttctTt aggaggatta atcgtatcgt ggtTtTgtagg  
166921 aattaaactt ccaggactTg aatacaaaa tcaaaaagcc gaagcagctt ttagaaaaga  
166981 gcttgTtTtat gctgaagata accgcaaga atacgctaaa aatgaaacca tgatagagct  
167041 ttttacggga cttaaattca attataaaag actTTTTtTg cactatggat actTtaatat  
167101 ttggTtgatt ttattTgagc aaatgatagt tatcgttcca tTTTtaatca tggctccagg  
167161 actTTTTgCG ggagctatag gactTggtat tgtaatgcaa attaataatg cTTTTgatca  
167221 agtaagaagt tctTTtagtg tTTTtatcac aaattggaca actatcacc aacttagaag  
167281 tatatataag cgtTtTaaag aattTgaaaa aaatatcgaa tacgcgaaaa ataaaaacaa  
167341 aaatcattTa taaaaatgTc taaattTgcc aaaaattatc aaagcgatga aaagtaaaaa  
167401 ggctgtgaaa atacataaaa attcccagcc aaaactTtCa taataaaaaac ttggcaatac  
167461 agaaccCaaa gcgccccac tataataaaa tGtTaaataa attccattgg ctaagcctTt  
167521 tttatccgCG atcgaattTa aaatccctga aaatatgcaa tgacttataa acattccgct  
167581 acaaaataca aacatagcaa aaaaggcaaa ataaaaattc cTactatca taaaaaaaca  
167641 accgTtata aaaactaaaa atccaaatat agctgtgcga atTTTTgagc ctaaaattTc  
167701 tatggTtTtTa cctataagTa gtgagcttTa tactccggtt aaaaatcca aataaacaag  
167761 tccaattTgt gTttgagtGa tatctTtTat actTtctTtTa agatgaaaag gTaaaaaact  
167821 tactatgctt tgaaaagaga aaaagatagt aaaaacacaa aataatatca ccataaatct  
167881 aagTtctTtG ataaaaggTa aaaaatccct caaggaagtT tgagtgtTtTa agcttatagg  
167941 atgctctTtTa aaaaacaaaa ataaaaaagc acaaacctc attaaaatac taaaaaaatt  
168001 taaggcaaaa tgccaagaaa aaagatcgct caaaaaactt ccaaaaacc tccaacaaa  
168061 accaccaaaa gTtgtagcac ctacataaat ggctatgtTt tTttgtatat tgtcgctTtC  
168121 taaacgacta agcaaggTaa gaagtgcTgt cagtatagca ggtatacaaa gagcttgTaa  
168181 aaatctaaga aatagaaaaa aataaaaaatt atcgTtTtaag tttccaataa taccaaaaat  
168241 agaacataaa aacaaagaaa caacaagaat tttctTtTaa gaaaaaattt caagtaata

168301 accataaacc aaaggtgcga ttgctaaggg aataagcgta acactgatta tccaagaat  
168361 ttggtgcaaa tttacatgaa aataattaga caataagggt gctatagggt gtggagcata  
168421 gacaatagat agggttaatg tagcacaaaa aataatcaga attttaagca ttttcatgct  
168481 ttaaattaaa ctccaatgca aattaatfff agcttaaaaa taatffffaa gctaaaatff  
168541 tacttttaat tgtgtataat taagtatfff atttataagg agcttttatt ggaccccagt  
168601 caggttttag atttaacca aactttacct acagcgtcct ttgatgcagg atattctata  
168661 cttatgggtg tcattgcact agcttttagt cttttaaatg gctttttcgt tttatctgaa  
168721 tttagtattg ttaaagtgcg tcgttcaaaa cttgaagaaa tggttaagga aaaaaagta  
168781 ggtgctaaaa aagcactaga agttacttca agacttgata cctatcttag tgcttgtcag  
168841 ctaggaatta ctttaagttc tctagccctt ggttgatag gtgagcctgc tatagcaaaa  
168901 atgttggaat ttcctcttgc aatccttggg tttaatggag ttattatcca tactatagct  
168961 tttattatcg cttttagtat tatcactcct ttgcatgtgg ttttaggcga gcttgttcca  
169021 aaaagcattg caattgctat tgcagataaa gctgtgcttt gggtagcaag acctcttcat  
169081 tggttttgga tacttttctt gccttgtatt aaaatfffct attttcttgc ggctatgact  
169141 ttgaagcttt ttggtatcaa gcctgcaaaa gaaagcgagt taactcatag tgaagaagag  
169201 attaaaaatca tagcaagcga aagcaaaaaa ggcgggtgtt tagatgaatt tgaactgaa  
169261 attatccgca atgcbggttga tttttcagat actgttgcaa aagaagtgat gacacctcgt  
169321 aaagatatga tttgtctaaa taaacaaaaa acttatgctg aaaatatgca aatcatttgc  
169381 gatcataagc atacgcgttt tccatatata gatggttcta aagatactat tttaggtatg  
169441 atacatatac gcgatatagt acaaaatgag cttagtgata agagtgaaaa tttagatact  
169501 tttgttaagc ctttgatttt agttcctgaa aatattagca tttcaaaagt tcttgtgatg  
169561 atgaataaag agcgttctca cactgcactt gtgattgatg aatacgggtg aacagctgga  
169621 attttaacca tggaagatat catggaagaa attatcgggt agattaaaag tgaaaatgag  
169681 gaagacagct ataaaaaact tgctgaaaa atctatgaat tccaaggctg ttgcatata  
169741 gaaaccgttg aagaaatgct tttgataagc tatgatgagg atttagagca agtaacgata  
169801 ggtggttatg tgtttaatct tctaggacgc ttgccctgag tgggtgatcg cattgaagat  
169861 gagctttgtt actatgaagt taaaaaatg gatggtaatt ctatagagcg tgttaaggtg  
169921 gttaaaaaaa ccaacaaga tgaagaataa gccttttttg gcttatttct ttctataaac  
169981 tttatffffa agttctatac actcaaaacc tttttgtct aaagttacta tacgcaaatg  
170041 tccccatca tctactttac cttcgcacaa aaatactctt ttttctattt gcacaggcaa  
170101 ttttgtgcbg tttctatgtc caaagatttg ataaacattg tcttttgtaa attcacaana  
170161 ctgacttgct actttttgac tttcttcata atttcctac ccataaataa aatcataact  
170221 tgacataaag cttatttgat aagccttaga aggtaaaaaa tttaccctgc catgcbgaca  
170281 aaaaacttgt tttcatgaa atttataata cagacattct tttagtaag gatagaatff  
170341 tctagcatcc ctaggcgtga gtttttcttt tctaaaatct ttgagtgtat tttcgttaaa  
170401 ttctttagag cttgatagtt ctccattggc ccattttatc aaatgtcttt cgtgatttcc  
170461 ttcaagtaaa tatacattct ctctctcgca aatffffaagc aagaatffff agacctgccc  
170521 attttctatg cctctatcga tataatccc taaaaagata tagcattcat catctttgag  
170581 ctcttgtaga tattctttta agacgctaaa gcagccttga atatcaccta tgtgggtgaa  
170641 tttcctatac ttactaagat taggcatttg ataaaggcat tttttccaat cattaggatt  
170701 taaaatcgta tattfffftag gaattctttc aagcaggtga tgggtfffft ttaaaagtga  
170761 ttgtgagact atatagccac gctctttggc tttttgttca tttttttcaa gacattcttc  
170821 taaagagcct ttaaaatcta taacataaac attatagcga tattgttttag ctagctcttt  
170881 gtaaacctta agggtttcat tataagcatt aatgatgcaa aattcacctt tttgcatagc  
170941 ctttctaaa aattgaagta aaatffffata taattcttca tcatffffta gatttaaat  
171001 tttatattta cttacgattt tacttacact tctgaaagc aaacgcaaag aatttagatc  
171061 aagagtgtaa tcttttaagc gattttcttt gataaattct tcttgtcctg cgtagtaatt  
171121 cccccttaaa ataagtaaaa tacgcaagtt tttgcctaaa ttttctttaa aaattcagtc  
171181 ttttagcaca taacgcaaaa tttatctact ttagcttcaa tttcgccttc tttagaagta  
171241 agtttgatat ttttatcgt tgttccgcgt tttaaagtag tgctagcacc tttactttt  
171301 aatctffffa tcacacttac gctatctcca gcatttaatt ctgttccatt tgcactttta  
171361 ggcattffff tcctffffaa atfffftat cattgtatat tttatcatca ttttctaaga  
171421 ttttcttga gctaagcgt tctttttgat atagatatg atggattcta caccaaga  
171481 aaaagccata gcaaaatata cataagtttt tgaatatga aatccaaac cttcggcaac



171541 taaagttaca ccaactaaaa tcaaaaatgc tagagctaaa atcttaatcg ttggattatc  
171601 atcaacgaaa tttgagatac ttttgcttgc aagcatcatt acaaaaaacag ctacaatcac  
171661 tgcaatcatc ataatttcta tattattaac catacccaca gcagtaataa ccgaatcaag  
171721 agagaaaacg atgtctaaaa cagcaatttg tatcaatatg ctaaaaaatc ctcttttagc  
171781 tccctctttt aaaacctctt catcactttt ttctccagca ttatcaatat catgatgaat  
171841 ttcaagtgta gattttgcta tcaaaaataa tccacctaag atcaaaaataa tatctcttcc  
171901 tgaaatttct tgtgaaaata cgctaaaaag cggggttgta agtttcataa tccaaaataa  
171961 agaaaggagc aataacaaac gcgtaatcat cgccaagtc aaaccaaaaa ttcttgccct  
172021 ttgtcttttt tctttaggga gtcttcctac caaaatagcg ataaaaatga tattatctat  
172081 ccccaaaaca atctctaagc caatcaaagt tgctagagcg atccacattt cagcactaaa  
172141 aaccctctcg aacataactt tccttaaaat tttgaaattt tttaaagtgt aattttataa  
172201 cttcaaagca aatattaat attttgatat agtatataat taaattttta taaggaaaa  
172261 taatgaaaaa actagaagat atcaaagcta tgaattacaa acaaaaagat gagttagaag  
172321 atttagttct tgaggctata agagataata atttagctaa agtaaaagag attttaaaag  
172381 attatcctgt aaaaatttct tgttatgagc ttcattttta aaatgataac gaagaatc  
172441 ctttatttga tccttattat ttgataatga gagctgcata tgcttgtaa gaaaataata  
172501 atgatttttc tatttttagat tattttttg atgagtatgg cttagtcta aaagatccta  
172561 aatataatth ttgctttaca gatatgaaat atatcaaaga agctaagat aaatatatth  
172621 taataaaaaa agcaaaagaa agcaacatta tttgtcgaaa cgctttaatt tattattata  
172681 tactcaatgc tgataatcca aactctcata tcattaagta tctagtcaat cgtggggcta  
172741 aatttgaagt gcatgatgaa ggatcatttg gttggactcc tatgcatttt tgggctagac  
172801 gtaataatta tgaattatta gaactagcca ttaaaggagg agctaagta aatagcaaaa  
172861 ccctacttga tccagagagt gaatacaatg aaaccctttt atttgaagct gtaaaagaag  
172921 cagaaaccta tagggttaca cagcttttaa tcgaacttgg agccaatgta aattttgcta  
172981 ccccaagaac cccttttagat gatgcaaaag gatctagaaa taaaaaactt ttaaagatg  
173041 caggagcaat gacttcaaat gaaattagaa agaaatttaa tttaccagca tatgattcct  
173101 ctattgtgta aattgatgga aaaactgatt ttgacttatt gggtaaatat cgtgatgaat  
173161 gttccaaact tttaaacgac gctataaaaa aggccaagga gaatggagaa attaagaata  
173221 tagatgctaa aataataaag aatthataac aataaattta aataaaattt actthtaagg  
173281 aaaaacatgg gaaataaaga ctttggctat tttthaaatg ctttagaaaa caatgatata  
173341 aaagcacttg aaatthtact ctttgatgaa gagttatcaa atatgcaaga tgagaatggc  
173401 aatacactac tccaccatgc agcaagacta ggtagcgcag gaggtgtggc aatgctaatt  
173461 gattgcaatc cttttatccg taataatgat ggtaaaacag cttthaatat agcttacgat  
173521 aatgatgatg tctatatagc caaatgatt gataatgtta aagataggtg gcaaaagaag  
173581 catggtaggt atgaagaaaa attagatgaa agcgaaatgg atattccgtt ttatthtaact  
173641 gatgataaag aaagtatttt aaaacaattc aaggaagaaa atatcacaac tgaagttta  
173701 tttagactt cctatggaga tggaatggtt gtattgcaat ctgtthtaaa tgcattggaat  
173761 ttaagtttta ttaatgaaaa aatgcctcct gttgttgaaa tthtaataga tcaagccaat  
173821 ggggatggtg aagctthta atagtgattt gatgaacata tggagcaatg ggaaaatgag  
173881 gtttgggatg aacctgctgt atatgctgga aaaactgaag atggtgaaga tgattatcgc  
173941 tatgaaaccg atcctgatga atggataaga gaaattatac cttttgataa atgggatgaa  
174001 ttaaaaaaac aatgcgtht atatgcagtt aaaaaatgat tttgatagac taataacca  
174061 taataagctc gggttattag gtaaaactta gagataaaaa tgcgtaaaat aacgcaagtt  
174121 agatccttta aatthaaact gcaatthagt ttttgggatt ttgcacattt taaccatatt  
174181 caatacaaac aaatatatth tttgcaagat atththtaat ggaccggtta agatagaat  
174241 gatttaagct ttagtgtata aatthtagta atatcttatt ctttttgtc gtggcgtatga  
174301 aatgtthaaa tactctcaat ttatatthta taatthtaat aaagattthaa acaaatata  
174361 catgaattht actctaaata ataaaaataa ttataaattg attacagaaa aatthgcaat  
174421 cacttgggct aaactthatt ttttacatcc atthaaagaa agacaatgaa aaacacaaag  
174481 gatcaagaag tggthttatc taccacagac atgctcacag aagtataaaa acaatthta  
174541 aagaaatgta thttacatcat atcaaaggag tagcacctaa thaaatcatg atagaagat  
174601 thaaatthaaa thaatcctgct aatatagaag aagaatthaa caaaaacaaa caaatata  
174661 aaaacthaag gagcaacaat gaaaacatta gaagatatca aaaaatthaaa ththaaata  
174721 aaaaatggaaa thcaaaaaca atthattgatt thtattagta ataatgactt agaaaatgth

174781 aaaaatcttt taaaagatta tcctgtaaaa gaaagctttt atgaggcaca ttttacatat  
174841 catcataata atgaagatta tgagttatct ttatgtgatc cagcagcaag cttactaaaa  
174901 gctgcattta cttgtggaaa ttataataat gatttttcta ttttagatta tttatgtgat  
174961 gagtatgggt taagtttaaa agattctaaa tataattttg cttttcctga catgaaacat  
175021 atcaaagaag ctaatgataa atatatttta atgaaaaaag tagaagatga tccttgtatt  
175081 tatcaaaaag ctttaattta tgcttatata ttaggcgcta aaaatccaaa ctctcaaadc  
175141 attaagtatc tagtcaatcg tggggctaaa tttgaagtgc atgatgaagg atattccggt  
175201 aggactccta tgcatttttg ggctagacgc aataattatg aattattaga actagccatt  
175261 aaaggaggag ctaatgtaga tatgcaaacc cgacttattc aagagagtga atataatgaa  
175321 acccttttat ttgaagctgt aaaagaagca gaaacctata gggttacaca acttttaatt  
175381 gaacttggag ccaatgtaaa ttttgctacc ccaagcacc ctttagatat tgcaaaagga  
175441 tctagaaata aaaagctttt aaaagatgca ggagcaatga cttcagaaca aatcagaag  
175501 aagttaata tatattggga tgataaagag tgtaaaaaag ataaaaacta tatagaaaa  
175561 cactccaaac ttttaaacga tgctataaaa aaggctaaag aaagtgaatg agggaataga  
175621 aattaacttt gctaaaataa actataagga aagataatga aaaataaaaa tttattggat  
175681 aaagatacac aagaagtatt taagtactat cttaaaaatg atagttattt aaaaggtgct  
175741 ttagatgggt taaaaaata cgagcgaaga gcttttataa gtagcatctt aagctatgaa  
175801 tataaaaatc tagtggaaaa tggcaattta aaagtcgatg aaaaatataa agctatttta  
175861 ccacctaact taatcgccat tttagaatat gataaaagtg aatttaatgg tgcaaatctt  
175921 cgaaatttta taaatgattt ggaatttgaa ttagaacata tagaaatgga actctatgat  
175981 gatcctgctg actttgaagg gggagattat tataacgaag atagcgaatg tgatgaggat  
176041 tatacagtag aggattgggt agaagatcaa gtaagcgata ttagagattt tttatatgct  
176101 ttaaaagatt ttaaaagtaa ataccgataa aacactcaag taaatttaat tttctaaaat  
176161 ttagcgataa aatatcttaa cttaatgaca attttcaaaa atttctacta cacttaaggg  
176221 taaaatttca tgctctaggg cgtgaatttt tgcttcaaat tcttcaaggg ttaaattttg  
176281 tttttcaaaa gccttttgag cgatgatttt ccctccatct aattcttcat ttaccaatg  
176341 cacactcact ccagctactt tcatatcgct ttcgtagctt tctttgatag catgagctcc  
176401 tttaaaagg ggtagtaaag atggatgaag attaattgct ttgatatttt ttgtaaaaac  
176461 agggcttaaa attcgcataa atccagccaa gatagtaaga tctgctccgc tttctttgat  
176521 tttttttacc aaaatttcgt caaattcttc tctgttttta taatctttgt gttcgatgat  
176581 cacgctttca aggtcaaagt ttttagctct ttgtatcca taagcatctt ttttattgca  
176641 aagacaaagc acgacttcat aggtgttttt acctatagtt tttttatgaa gtttttctaa  
176701 gatattttgt aaattacttc catttccact aaaaagtacc gctaatttta caagcatttt  
176761 aatcctttta taagttttat cgcatcaaag ctgtttttgt taaatttata ttttttagcc  
176821 acaagagcgt gtgctaaaca agcattttta gccgcttcca aagcgctgaa ttttaccctt  
176881 aaaagcgcag ctatcatacc gcttaaaaca tcgccacttc cgccttttgc taaagcttca  
176941 tttccaagat ttacaacaaa gattttttct ttttgataa tgataggatt tgcacctttt  
177001 aaaacaagaa cacaatcata attttgtgca aatttttttag cataaaaaaa gcgatttctt  
177061 tgcaaatctt ctatacttaa atcctcatca aaacacattt tataaagtct tataaattct  
177121 tttggatgcg gggatgatgac tacatctttt ctgcttagat accaaagcac agcttccatt  
177181 aaaaagcaat ttgcatccaa aaccaagga atattttgca aaatctcatc ttttaaaata  
177241 tctaaatttt caagtcccat acctaaggca atggcacttg cattgttttc aatcttttct  
177301 ttttaacatta aaagaggtga aaaacttttt tttgcgacta aggatacaag cccactgcca  
177361 aaatttaaag ctccaagtcc tgctaggggt cctgcacttg cactagctat tatatagata  
177421 tgaccgaaat ttcctttatt ggagcttgta tttctttcta tggtttttaa atctttttct  
177481 tcaagtaaaa aagctttgga atcaagacta aatttttttag cattgacacc aaggtttgcg  
177541 agtttgattt tgcctacaaa ttcttttagca aaatcctcaa gtaaaatttc ttttaagct  
177601 cccatacact gcgtaatatc ggctttaaag caaggagtaa aaccxaaatt tgtaggtatg  
177661 tcacaagcga ttttaaaagc tttgctttga tttatttttt ctaaaatttc ttttgttttt  
177721 tcatctgctt cgcggtttgt tcctgtgcct aagatacaat caacaacaat atgaaatttt  
177781 ttaaatttag gctctttttt tgcaaattta aaacaaat tttttaaaat ttgctcttgt  
177841 tttttaaaaa tttcattttc tttaaagcct agtttataag cttttgcatg ctttaaat  
177901 cttaaagcta ctaggccatc agcagcgtta ttgcctccgc ccaataaaaa aagtattttt  
177961 actttcttta tcttgtattg tttgcgaatt ttttttgctt cttttttgat aagcttagct

178021 aaatttaatc ctgcgttttc cattaaaata agctcatcta agccttttatt tatagcattt  
178081 tgttctaaag ttttaatatc atcagtaata gttttcataa tcttttttca ccagaaaata  
178141 aatatttttt tctcgtctctt cttcaaattt tttcatttta ggtaaaaatt tctgaattaa  
178201 agcacgaaaa tttttaaaagc cataattttg cggattaaaa tcagaatatt tgcggttcat  
178261 attggtgcga atttgtgcgt attcggcgcg tcctttttca tcgatgagtt gttctgtgat  
178321 attgatcaaa gctcttaaat aatccttgct taaaatatct tcttttttgt tttcatcttg  
178381 atcaaggtaa aaaaactcac taaaagcgtt tacataagat tttatagact tttcaagacc  
178441 cattcctata acttgctttt tgttttctct tagcttttga atgagcgagg tataatcact  
178501 atcgctagaa acaatgacaa aaatatcaat atcttttctca taaaatatac tcataatttc  
178561 agtgattaa tacatatcac ttgaattttt atttgctgcg aaattaaact gctgcatagc  
178621 gattaaagaa tactcggcaa tttgctcttt ccaagcttga atattttttt gagtccaatc  
178681 tccataaata cgcttgataa ttatttcacc ataacttgaa gcgatatcaa aaatactttt  
178741 tgcgtatttt gcgggtatat tttccgcata aataaaaata gctatgcttt tattttccaa  
178801 ttttagctcct tatcctaaaa ctcaaagctt ctaaaatatg atttttatta agaagttcct  
178861 tttcttcaaa atcggcaata gatcttgaaa cttttaaaat tttattttaa gctctttgcg  
178921 aaagattata gcgcgaaata gctaaatcca aagtatcctt ggcatctttt tctaaaatac  
178981 aaaatttttg taattctaca tcgcttaatt tgccattgaa ttctttttgg ccgctttttt  
179041 tgccaaagat aaaagctttt aaaattcctt cgctcatttc tttcgaattt gtgcttgatt  
179101 tatcatcttt actgatctca tccatagcta cataaagatc aattctatcc ataatagggg  
179161 ctgaaatgtg atttttatat cttttaatct cattttcact gcaaacgcaa gacagatttt  
179221 tagaaaataa atttccacaa ggacaaggat tttgagcggc aacaaaactg aatttagttt  
179281 cataagtggt ttttgaattg actcttgaaa tatgaatttt atgatcttct agaggttctc  
179341 ttagactttc gataatttgt ttgttaaaat gaggaaattc atcaaaaaat aaaactccac  
179401 cattagctag agcgatttca cctatcttcg cattttttgc tccaccacca aaaatactag  
179461 ctctttagta ggtatgatga ggggtgtctta aggctctttt ttgcgtaaat tcgcaatctt  
179521 tagaatttaa agacatataa gcattttgca ttaaaacctc atttaaactt tgtggaggca  
179581 tgatttcaac aaggcgtttt gcacacatac ttttgccact tcctggactt cttcaaaaa  
179641 gtatattatg catgcctagt gctgctatca aacaagctct ttttagctttt tcttgtcctt  
179701 tgatatcttt aaaatcaagt tcaaaatgat gatttttaat aaaaatttca ttttctataa  
179761 tcaaaggatt tgcaaataaa ggatggcttt ggggtgaattt gaatttctca tagttttttt  
179821 ctttaaaaaa ttcaatcact tcattttaat gctcaagtcc gtaaatttct agattgggta  
179881 tcatagaagc ttttagagct atattttttg ggactacaac ttttgcactt tttaccttg  
179941 tggataaaaa taaaagcaaa gaaaaaagct cattgggtgct tttgatactt ccatcaagac  
180001 caagctcgcc taccacaaaa aaatcatcaa agtcttcatt ttgcaacaat ataagcgtag  
180061 cgataactaa atcaaaatga gaaccttttt ttggaattcc tgaagggcta agattgatgg  
180121 tgattttttt agcaggaaat gaaaaattgc aagttaaaag tgtggctttg atacgctcga  
180181 tactttcttt gattgcaata tttgcaagtc cgactatgct taaattaggc aagcctcttg  
180241 taaatgtaga ttctacatcg atgatatcta aattctcatc aaagcttaca cattttaatt  
180301 ttttcattta gatttttttt gatttttaag tttctttttg aattctttat caaatttttg  
180361 tctttttaa aaagaaatct tttctataaa taaatgacca ttaagatgat cattttcatg  
180421 ctggatggcc acagctaaaa atccttgagc ttctaattct ttaaaatttc caaagcgatc  
180481 ttgatatttg agtaagatat gattataacg ctccacttct tcaaagaagt caggcacact  
180541 taagcaacc tcggtgcagg tgattttttc ttcatctaaa ggaatgattt gcggatttat  
180601 aatttctagt aaatcttctt ttttctgctc ttcattttca tctaaaatat ttacgatcaa  
180661 tgcacgaagt gggatatcta cttgtatagc agccaaacc actccttgac tagcaatcat  
180721 agtatcatac atatcatcaa gtaaagtatg aagtcttga tcaaattgct ttacaggttc  
180781 agaatttaa aaaagtctag aattaggata agtgataatt tttctaacca taacaacct  
180841 ttattttaat gattttaatc attttaaact tttttctaaa accttatcga tcaaacata  
180901 ctcttttagct tcttgtgctg acatgaaaa atctctttct gtgtctttta ctattttagt  
180961 gactttttgc ttggtatttt ttgccaagat atcattaagt atagctttta atctttaa  
181021 ttcttttagct tgaatttcta tatccgtagc ctgtcctctt gcgccacct aaggctgatg  
181081 tatcatgatg cgtgaattag gcaaagcaaa acgcttgccc tctgttccgc aactcaataa  
181141 aaatgcgcc atagatgcag cttgacctat gcagatagta caaacatcag gcttgatata  
181201 attcatagta tcatagatac taaaaccgct tgtgatcag ccacctggag aattgatata

181261 aagatatata tctttttgtg gatcttcagc ttctaaaaaa agaagctgtg ctacgataga  
181321 agcggcaagt tcatcgtgaa tttcgcact tagcataata attctatctt ttaaaagacg  
181381 cgaataaata tcataacttc tttcaccgcg acttgTTTT tcgattacat aaggatgta  
181441 cattatttat cttctttctc ttttttactt gctttatcag cttttggcat aaaaatatcg  
181501 ctgaaaagtt tttcttcgat caaagccatt ttaactgcag gtaaagcccc ttgttttttg  
181561 taattttcta aatgttcttt tggattcatt ccatagcgat aagcttcaaa ataaattgct  
181621 tggatcaatt cttgatcatt tacttcaatt ttgcgaagtt ttgcaagctc atcaatgata  
181681 aaagtaagtt ttacactttt ttgtgcttct tctttgaaag aatcgcgctt ttcttgatat  
181741 ttttctttgc ttgttttaag ttcttcaatt tctttttcgc tgaatgtgtt aaatgcggtg  
181801 cggattgca tatcagtttc ttgctctact ataccgctg gtaagtcaaa attgtatttt  
181861 tcgattaaag catcagcaaa ttttagctttt agttcatcat ttacaagctt gaaaagcttt  
181921 tcgtttttga tttgttcttt aagtttttca tctagaagtt caactgttgg tttttcttca  
181981 tttggtaaaa gttttttgag tgtttcttca tcaagttcag gtaattttaa ctcttgaatt  
182041 tcgtgcaatt ttacttttaa tactgcatct tttcctgcta aatgtgctgc gccgtattct  
182101 ttaggaaagg ttacttttat atctttttct tccccacttt tcattcctac cataccttct  
182161 tcaaagcctg gtatgaattg ttttagagcct attttcaaaa cataattttc agctttacc  
182221 ccatcaaaag ctttctcatc taaaaacc tcaaaatcaa attttgcaaa atcaccctct  
182281 tttaaagctc ttttagtttt aatagcttca ggagtagcaa agcgttttaa taattcttct  
182341 tttttttcat caatttcttt ttttagttact tttggagttt gatactcagg aatcaattct  
182401 tcatagccat cgagttttaa ttcaggttta aaagaaagag ctaattcagc aacaatttct  
182461 ccatcttgac gatcaaatth ttcaaaatac ggttcaccta caagttcttt tacttctttt  
182521 ttttaattctt ttaaagcact atcaacggca gatttaaaaa gattttgttc tgcacttga  
182581 gtcaattctt tttgatattt ttttaagcag gcagcaacag gaacttttcc tggcttaaag  
182641 ccatccattt ttacattttt agaagctttt ttagctaaat ttttacttc gcttttaatc  
182701 atccctgaag gaatttttac actagcagtc gcattaacag agtctaattg ctttgctttt  
182761 acttcataa catttttctt tataaaataa aatttgcttc aatcatagca aatttttctt  
182821 tattagttgc ataaaatttt aaagcatttt atgttaaaat gagctaagaa aaaaatacgg  
182881 agaataattt gcaagaaaaa tttgaaaatt gcgtaaaaac tatgcttga atcatagggg  
182941 aaaatccaac tagagaagga cttgtaaaga cgcctaactg tgttttttaa gcttatgagt  
183001 ttttaacaag tggatataaa aaaaatgtca aagaaatatt aaataatgct ttatttgaaa  
183061 gctcaaataa cgaaatggtt ctagtgcgcg atatagagtt ttatagtctt tgtgagcatc  
183121 accttttacc tttttttggt cgcgtacatg tggcttataat ccctgatcaa aaagtgggtg  
183181 ggcttagcaa aataccgctt cttgtagaag tatatgcgag aagacttcaa attcaagaac  
183241 aacttaccga acaaatgctt gaagctttga tggaaaatgt tggcgcaaaa ggcgttgggtg  
183301 tggttataga agcaagacat atgtgtgttg aaatgcgtgg ggtgcaaaaa gcaaatctta  
183361 ctactaccac ttcggctctt cgcggacttt ttttaaaaaa tgaaaaaaca cgcgaagaat  
183421 ttttttactt cattaattct cctaagcaag ttcgtttttg atgaatttag aaaaacttctg  
183481 ttctaaactt ggcaaagaaa atttaagtgc tgtttttgga gagatcacta aaatttctgc  
183541 tacaagtata gaaattcgag gacttaaaac aggtgttggc gatattcatta aacttgtttc  
183601 aatgaaaat gaaaatttaa acaccttagc tatggttgtt gaaatcaaag agcaatttag  
183661 ctatctaagc ctttttctt tcatagaagg ttttaaaata ggcgaccgtg cttttataag  
183721 tgatgcagga atgcaaatag gcgttagtga tgagctttta ggaagggtag tggatccttt  
183781 tatgcgccct aaagatggca aggggtgctat agaagcaact aaatatatgc ctatcatgcg  
183841 tgcacctatt gatgcgatga aaagaggact tatagaagaa gtttttctg tgggagttaa  
183901 aaccatagat gcgcttttaa cttgtggtgt ggggcaaaaa ttaggcattt ttgcaggaag  
183961 tgggtgtagga aaatctacc ttatgggtat gatagttaa aattcaaaag ccctatcaa  
184021 ggtagtcgca cttataggtg aaagggggcg cgaaattcct gaatttatac aaaaaattt  
184081 aggtggaag cttgatgata cagtaattat cgttgcaaca agtgatgata gtgctttaat  
184141 gcgaaaatat ggagcatttt gtgctatgag cgtggctgaa tactttaaag aacaaggcaa  
184201 agatgtactt tttatcatgg atagcgtaac gcggtttgcc atggcaciaa gagagatagg  
184261 acttgccttt ggtgagcctc ctactacaaa aggttatcct ccaagtgttt taagcctctt  
184321 gcctcaactt atggaaagaa caggaaaaga agagggtaaa ggaactataa cggcattttt  
184381 tactgttttg gttgatggag atgatatgag tgatcctatt gccgatcaaa gccgttctat  
184441 cctagatggg catattgttt taagtcgtga gcttacggat tttggaattt atcctctat

184501 taatatacaa aattcagcct caagggtaat gggcgatatac ataagtcctg aacacaaact  
184561 ttgggctaga aaatttaaac gcttaaattc gcttttaaaa gaaaatgaag tattgcttcg  
184621 tatcgggtgct tatcaaaagg gtagtgataa ggagcttgat gaagccatag ctaaaaagga  
184681 atttatgcaa aaatTTTTtag gacaaaatcc tgaggaaagc tttgaatttg aagaaactat  
184741 aagactttta agtcaaattg atgctaattg tgcccctagt gcagtcgagc aaaatattaa  
184801 tatgggaagt tctagtgcaa cgctacctaa tcctaattctt aaataattctt attttgtatt  
184861 aaaataattt cataaatata gaaatgtaaa tttcatcaac aaattaaatc ttttagattga  
184921 tactcgcata tcaatctaaa ttttatatat cagtctctaa ttaaacctt ttctttttca  
184981 catcttcaag tatattatta gctatatcac ttacagtatt agaaataata gc

//

LOCUS DMACINML\_4 166796 bp DNA linear 16-DEC-2020

DEFINITION Campylobacter species strain strain.

ACCESSION

VERSION

KEYWORDS .

SOURCE Campylobacter species

ORGANISM Campylobacter species

Unclassified.

COMMENT Annotated using prokka 1.13 from  
<https://github.com/tseemann/prokka>.

FEATURES Location/Qualifiers

source

1..166796

/organism="Campylobacter species"

/mol\_type="genomic DNA"

/strain="strain"

gene

complement(641..3007)

/gene="pflA"

/locus\_tag="DMACINML\_00735"

CDS

complement(641..3007)

/gene="pflA"

/locus\_tag="DMACINML\_00735"

/inference="ab initio prediction:Prodigal:2.6"

/inference="similar to AA sequence:RefSeq:CAL35662.1"

/codon\_start=1

/transl\_table=11

/product="paralysed flagellum protein"

/protein\_id="Prokka:DMACINML\_00735"

/translation="MKIIFLVLLSICTLFSFELALNTGRENNQAFVLHASNDLDFTC

QKIIIEDKMHFECEIMGIVDNKLSQSFTAFDLKFIKEPKIKMIIIPKISARMFDL

QNIYADKELNSSSMHKSFSFTFIFTPELEHVVDYDGLDFNINFPHESLPYVGALDLS

DPVIIPQSADINTYLRIKNEYDKANYTQVITDAQNAINRYRGSIFMNEFELYKLRAS

QIYTQDPSMRDQQVLEKMIDEAKNWNRTFTSDKNFPEVLHIMLRITYALSQRADIEYI

MSILNNEQPNSYFTQLARLDYADYIYPLNEKERAIYIYEDYFNTKNLDAARAAMSL

IKDYLANNQIDKAVQYVNTILKANPEYFPKDMFRSLELAKLFNQHKQYDISASIYEDV

FLKMPKIDSRYEQVLKDLALTLAMTSRSSDAKKYLDLYMDNYLDGKYLDERKANDEV

FFALADNNATFLHQRYANLMKEYAQKDENIANKALDEDVALYYKEGNLSAVLAYKDQI

ENKKL TNSTKLL EQAATQLLNNDLKADNCINAVNIFTQFNSYEIGQKIENKKQMLACL

IRTSNMQQAMDYIDKNHNEDSIFYGLQKASILYDNKQYPLALNIAREIANSRILKSDE

ENFKAYYLQFLSYLKMDYDYMMAIKILQILESFPNFTMVEAYDNLIIYANDHNMQTTI

LNYAPKAIDYQNLKGINLFSPLNFIYLDLAKTNQNEESLAVLIDLKLLKLSDEDRA

RALYIQSMTYERMONTQAQKESLQCLELKTTSNWQNLCDKNQILAQ"

sig\_peptide

complement(2945..3007)

/gene="pflA"

/locus\_tag="DMACINML\_00735"

```

/inference="ab initio prediction:SignalP:4.1"
/locus_tag="DMACINML_00736"
/locus_tag="DMACINML_00736"
/EC_number="1.6.5.3"
/inference="ab initio prediction:Prodigal:2.6"
/inference="similar to AA sequence:RefSeq:CAL35663.1"
/codon_start=1
/transl_table=11
/product="NADH dehydrogenase I chain N"
/protein_id="Prokka:DMACINML_00736"
/translation="MLGNIDLSSLNIPLSYFPAFLIAVAIVLLLCSGFWKFHRTFYMA
TSSLIVSVFLILNNAQAQGLEAKGFLGTLNNDIVSLYASLVILCFSFLYLLMQKEE
NQGEFYSLFLFMVAGLLMVSSSNLILIFIGLESSSLALYTLIAMRGSNNAISSAIKY
FSVAAVGSGFFVMASALIYIRTGTLDLGLKALDKDPMLLGAGVMIFVLCAIKLSLAP
FHFWLKDVYSSAHVNLVAFISVVPKIAMFVVVIRLFSFLNHLGFENILNVLAVFSMLI
AALAALSQKDVKKMFAYSSIVHSSFVLAACIPLLNAADDVLNSIFVYVWVLFGFANYGV
FLILSTFKGSSFEFNALLLKKPLIALSLSFCVLSLAGIPPFAGFWGKVMVLKTLIVA
DYWYLALFMALASLLMLYAYLKLIIHALFIKTQAKVSEHLNFIQSFILALCTLISVFA
LFLLLKI"
gene complement(4383..5873)
/locus_tag="DMACINML_00737"
/locus_tag="DMACINML_00737"
/EC_number="1.6.5.3"
/inference="ab initio prediction:Prodigal:2.6"
/inference="similar to AA sequence:RefSeq:CAL35664.1"
/codon_start=1
/transl_table=11
/product="NADH dehydrogenase I chain M"
/protein_id="Prokka:DMACINML_00737"
/translation="MLNYLIFFPPIAAVFTLVLNRRGGIKVFSVIASLMVGLNIKIWQ
DYLNGINLEYQLPFKVVNFMSYHIGADSIALLMLLSSLMIFLSFLFLKIEQKAMVSC
IFFLEFAIMGLFSSLDGLLFYVWFESLLPLLYIMGVYKDYRAGIKFFVYAFAGSIL
MLLALIYQAYATYKLLNIFTFDIEIWKNNASAMSFNEQILLFGAFFVAFAIKAPLFPF
HTWAPKVYANSPILVSMMLVAFKMAPFGFLRFCLPLFPDASVYFMPLVVALCIVSIIY
NALIAYRASNLKELIAYSSISHLGMILGIFSFNALGLSGAVFYMFHAGIVTGALFLM
AELLYKKYGTLEISYHSLASKAPLFTIFFTLILLASISLPLTLISFIFLILLGVAK
LNLLYALLAGLVIIILGAIYMLYVFRKMFQKESQLETCSLHAREILSLIPIVVLIFY
LGIAPKIFLDPLNKDADFIVEKMKERAIDDQTIRFLNHLEGENNVR"
gene complement(5875..7665)
/locus_tag="DMACINML_00738"
/locus_tag="DMACINML_00738"
/EC_number="1.6.5.3"
/inference="ab initio prediction:Prodigal:2.6"

```

```

/inference="similar to AA sequence:RefSeq:CAL35665.1"
/codon_start=1
/transl_table=11
/product="NADH dehydrogenase I chain L"
/protein_id="Prokka:DMACINML_00738"
/translation="MQNLALISLSPFVAFVLFASCFALSERKIFVAYICSLDIGISAF
CSLYLLFNNQAFNVSLFEWFIGLSFGFNIDAISLTMMSSVGVVATCVHFYSIFYMAHD
KDFNKFFAYLGLFVFSMLFLVMSDNFLGLFVGWEGVGLCSWLLIGFWYKNNTYSFAAN
EAFIMNRIADLGMLLGIFWLYIQAGTLKYNEVFATAQNLHDNALVLIASCLFIGAMGK
SAQFPLHTWLADAMAGPTPVSALIHAATMVTAGVYLVIRAGEIYSLVPEVSYFIALLG
AFVAIFAASMAVARDLKRIIAYSTLSQLGYMFVAAGLGAYGIALFHLVTHAFFKSL
FLGAGNVMHAMDDQLDIKMGGLFKSLKITAI FMTIGSLALAGIYPLAGFFSKDLILG
YSFIAHYHGIFLILLISAF LTA FYSFRLMLVFFTPSRHDKHPHEASKIALLAMSPLV
LAI IAGLFEHSFFEYLSTQLIFIDAQNKLVMICASVA AVLGVVLAIIAYKASWFKDS
IEQNKIHKLLSNDYFIPKFYHEFIVSKYESLCAVLKHCDTYIFDAIVEKIAYYCNLIS
QKIIMTNSLNLMLRFLVAGFVILLILVWV"
gene complement(7668..7961)
/gene="nuoK"
CDS /locus_tag="DMACINML_00739"
complement(7668..7961)
/gene="nuoK"
/locus_tag="DMACINML_00739"
/EC_number="1.6.5.3"
/inference="ab initio prediction:Prodigal:2.6"
/inference="similar to AA sequence:RefSeq:CAL35666.1"
/codon_start=1
/transl_table=11
/product="NADH dehydrogenase I chain K"
/protein_id="Prokka:DMACINML_00739"
/translation="MVEKYFFIAIAMFIIIGLIGILKRQNLIMLFISSEILLNAANLAL
VAASKMHQDLNGQVFALFVMGVAACEVAVGVAFVCLWYRRKGTLELKSLEE"
gene complement(7961..8476)
/gene="nuoJ"
CDS /locus_tag="DMACINML_00740"
complement(7961..8476)
/gene="nuoJ"
/locus_tag="DMACINML_00740"
/EC_number="1.6.5.3"
/inference="ab initio prediction:Prodigal:2.6"
/inference="similar to AA sequence:RefSeq:CAL35667.1"
/codon_start=1
/transl_table=11
/product="NADH dehydrogenase I chain J"
/protein_id="Prokka:DMACINML_00740"
/translation="MIEILAFVFFSVVVLGFLLVAVLSKTMVLYSLSALAGGMVFLSGF
YFLLD AEF LGVIQIIVYSGAVLGLYSFAMMFFDNSKEFKEKLRKKSFFLLVILSAVL
LLFMLLGFKHQNIASDLALSDPNLFDYKQLAF AIFSKYLLAFEFIAILLI ALICAI
VLTHKELTKER"
gene complement(8473..9138)
/gene="nuoI"
CDS /locus_tag="DMACINML_00741"
complement(8473..9138)
/gene="nuoI"
/locus_tag="DMACINML_00741"

```

```

/EC_number="1.6.5.3"
/inference="ab initio prediction:Prodigal:2.6"
/inference="similar to AA sequence:RefSeq:CAL35668.1"
/codon_start=1
/transl_table=11
/product="NADH dehydrogenase I chain I"
/protein_id="Prokka:DMACINML_00741"
/translation="MKNYYLIDEKRKTPSTWQKISQALKRSVKLELFVGLWVVMREM
LKRNSATIKYPFEKVKLDNRYRAVHRLMRFIESENERCIGCGLCEKICISNCIRMET
SLDENARKKVGNYINLGRCIYCGFCAEVCPELAIVHGTEYENAAEQRSYFGYKQDFL
TPIDKLNQVEFEGAGSLRKDADLLVKKTPNYEVLQEREKNLCTDEECALPNLAPQG
EVK"
gene complement(9148..10146)
/gene="nuoH"
CDS /locus_tag="DMACINML_00742"
complement(9148..10146)
/gene="nuoH"
/locus_tag="DMACINML_00742"
/EC_number="1.6.5.3"
/inference="ab initio prediction:Prodigal:2.6"
/inference="similar to AA sequence:RefSeq:CAL35669.1"
/codon_start=1
/transl_table=11
/product="NADH dehydrogenase I chain H"
/protein_id="Prokka:DMACINML_00742"
/translation="MSDFAFFALEALIKCIIVIAIFATLAGLATYAERKVLAYFQRR
GPDMVGPFGLIQLVADMIKLFTKEDIIPSNSQKLIFAIAPLIAAICAFVSLAAIPMLP
EFTLFGRTIQPLIADINVALLFVIGTSGLCFYAIFLGGLASNKWSIIGAARGLVAII
SYESVGALALIAIVMLVGSFSLIDINNYQSDGFFSWLIFKQPLAFALFVIALFIETNR
TPLCLTENEADIVAGYGTEYSGLRWGMFFIGEYASMIAGAILITLLFLGGFNDFYFIP
GWIMMIVKSSFIFFWYFWARAAPQLRPDQVMRMCYLILIPLAVLNLLITAFVLI"
gene complement(10139..12601)
/gene="nuoG"
CDS /locus_tag="DMACINML_00743"
complement(10139..12601)
/gene="nuoG"
/locus_tag="DMACINML_00743"
/EC_number="1.6.5.3"
/inference="ab initio prediction:Prodigal:2.6"
/inference="similar to AA sequence:RefSeq:CAL35670.1"
/codon_start=1
/transl_table=11
/product="putative NADH dehydrogenase I chain G"
/protein_id="Prokka:DMACINML_00743"
/translation="MTIKINGIDCAFEEGEYILNIARRNDIFIPAICYLSGCSPTLAC
RMCMEADGKVKVYSCNTKAKEGMVVESDLQNLWDERNEIMQAYCINHPLECGVCDKSG
ECELQNFTHKSRVNIQRHWIKDTHKPHKHGMINYDPALCIVCERCITVCKDKIGESA
LKTVPRGDSVDNSFKESMGKDAYAIWTKFQKSLIGPANGDTLDCSFCGECTSVCPTG
ALIGSKFQYTSNIWELKRIPASNPSSDCELMYYDIKQSGISNQPKKIYRVSNDFSFA
SLNKAARFAFDQNEASKDEKAFKELIELFEKNEIKNIKFNFSITNEEALILQNFKKK
FGLNLINNEALKFKDFLEEFISNSGEFYNATTQDITKSDFLVAVGTLLRYDAPTL SYK
INNALVMNKGSGLYFHPIEDAGIAKYSKNFISHTHKSDEEQILYFLQKFSQDENIK
ANLAEFFINENKEIEESINEEIEQVVEKDEEGNEISKEVKKVVPKVKKKTIEVKRSV
FAKNLGIDEDKLEDLLLKANFTLIIGSDFYFHKNACKLAKLLALIQTTPFKVFLNP

```



THTNTLGVAMICDLDESMQEGKTLGYNERGDFSFYSYEEHANLASSSLNQQEGTFLNYD  
 KKVPTNAALEFDGYFLNDLANALGFDEEYTINYTKRLPINKGFSPLFDSLDNFYTN  
 GGECKRGYDLNLECKKSAKNEFVAPHLQNLTLQEDEILLYSANPSYQFGRFSNRASA  
 INEVIFLGVSQLAKEKNLQDKDLVCLKIKDKELSLSVRIDKDIKNGAFLPYFDEKID  
 TLSFFDERFIVANLEKLGASHE"

gene complement(12598..13290)  
 /locus\_tag="DMACINML\_00744"

CDS complement(12598..13290)  
 /locus\_tag="DMACINML\_00744"  
 /inference="ab initio prediction:Prodigal:2.6"  
 /inference="similar to AA sequence:RefSeq:CAL35671.1"  
 /note="hypothetical protein Cj1574c"  
 /codon\_start=1  
 /transl\_table=11  
 /product="hypothetical protein"  
 /protein\_id="Prokka:DMACINML\_00744"  
 /translation="MSYERALCFVDMLSLKNKILCEKIQGENIYISCLEDKNLNAKFY  
 KCEIASLSYVLALLCKMSEMDNFQDLDEGYLSAESCFCGEESEILDFLENAKYLIVD  
 ENINFYKDSENIKYFLNFLSQKYKLIKILDSSEKECDFKNTKLSTLQELDSYDGLVLF  
 ANLKDDNLHCSKQFLQIAKCKDKSEVEVLAKDFSKTTLCLDENLQGTIAFLNYDHQG  
 FDFTPIRIKEAK"

gene complement(13287..13514)  
 /locus\_tag="DMACINML\_00745"

CDS complement(13287..13514)  
 /locus\_tag="DMACINML\_00745"  
 /inference="ab initio prediction:Prodigal:2.6"  
 /inference="similar to AA sequence:RefSeq:CAL35672.1"  
 /note="hypothetical protein Cj1575c"  
 /codon\_start=1  
 /transl\_table=11  
 /product="hypothetical protein"  
 /protein\_id="Prokka:DMACINML\_00745"  
 /translation="MRRVDLRKSKELFEDLAQIIKEAQKGEVLVVLFEIGDFSPVEKS  
 FSFVKEQGCELLNSLKFQVDWTIVIKKESV"

gene complement(13511..14737)  
 /gene="nuoD"

CDS complement(13511..14737)  
 /gene="nuoD"  
 /locus\_tag="DMACINML\_00746"  
 /EC\_number="1.6.5.3"  
 /inference="ab initio prediction:Prodigal:2.6"  
 /inference="similar to AA sequence:RefSeq:CAL35673.1"  
 /codon\_start=1  
 /transl\_table=11  
 /product="NADH dehydrogenase I chain D"  
 /protein\_id="Prokka:DMACINML\_00746"  
 /translation="MQIPSKLKPYYENIAFEQEDSKMIINLGPQHPSAHGNLRLILEL  
 DGEQVVKARPTIGYMRGMEKMAENMIYQEFIPPTDRMDYIAASANNAYCAAVEKLC  
 GLEIPRAAVIRMILLELNRIASHLLWLATHALDIGAMSVFLYCFREREYVLDLIEKY  
 CGARLTHSSMRIGGVMLDLPEGFLNELLAFCDFPKDIADYEALLDDNRIWRLRTENV  
 GVSKEQAMNWGCTGVMLRSGSVRYDIRKEEPYLLYNEIDFGVPYATQGDSYARYKVV  
 MQEFRESLKILRQCAALYKDTPEILANHPEYVSSSKEQILTQNYSLMQHFVLITQGL  
 KPPKGEVYVPTESPKGELGFFIHS DGTGRPYRLKARTPSYWHCAFF EEMLVGTYLADV"

VAIMGNVNIIVLGEIDR"  
 gene complement(14739..15530)  
 /gene="nuoC"  
 /locus\_tag="DMACINML\_00747"  
 CDS complement(14739..15530)  
 /gene="nuoC"  
 /locus\_tag="DMACINML\_00747"  
 /EC\_number="1.6.5.3"  
 /inference="ab initio prediction:Prodigal:2.6"  
 /inference="similar to AA sequence:RefSeq:CAL35674.1"  
 /codon\_start=1  
 /transl\_table=11  
 /product="NADH dehydrogenase I chain C"  
 /protein\_id="Prokka:DMACINML\_00747"  
 /translation="MRKYSDKKNAQLQNYKDRFYHAPHTQKLDVNESVFKQDYEVLK  
 TEVDIVNSFIELDWFVIEIKKEDNVKTLQMLQTLGYLNFTEASAIIDFVADKNGFEVfy  
 QLLNLEKRLRVRVRFVGVKERLQSVAHIFKGANWSEREIYDMFGIFIIHPNLKRIL  
 MPDDWYGHPLLKTYPLKGDFAQWYEIDKIFGKEYREIVGAEQRDPGFADDKDTLNFA  
 RLYHEVPKGGSRKEVSFKQEYQEDGGVAFVKKVKRDEAKILDKRR"  
 gene complement(15530..16033)  
 /gene="nuoB"  
 /locus\_tag="DMACINML\_00748"  
 CDS complement(15530..16033)  
 /gene="nuoB"  
 /locus\_tag="DMACINML\_00748"  
 /EC\_number="1.6.5.3"  
 /inference="ab initio prediction:Prodigal:2.6"  
 /inference="similar to AA sequence:RefSeq:CAL35675.1"  
 /codon\_start=1  
 /transl\_table=11  
 /product="NADH dehydrogenase I chain B"  
 /protein\_id="Prokka:DMACINML\_00748"  
 /translation="MAEHQVNYASGLPVVLTSDKLVQWGRSNSLWALSYGLACCAIE  
 MMAAGGSRYDFDRFGTIFRASPRHSEVMIIAGTLCKKHAETFRRLYDQMPDPKQWVISM  
 GSCANTGGMFNTYSTVQGVDRIPVDIYVPGCAPRPESFQFALMILQKKIRKEKASRK  
 MAPKRLV"  
 gene complement(16015..16404)  
 /gene="nuoA"  
 /locus\_tag="DMACINML\_00749"  
 CDS complement(16015..16404)  
 /gene="nuoA"  
 /locus\_tag="DMACINML\_00749"  
 /EC\_number="1.6.5.3"  
 /inference="ab initio prediction:Prodigal:2.6"  
 /inference="similar to AA sequence:RefSeq:CAL35676.1"  
 /codon\_start=1  
 /transl\_table=11  
 /product="NADH dehydrogenase I chain A"  
 /protein\_id="Prokka:DMACINML\_00749"  
 /translation="MSHIDASHPYFGIFLMLVLASVIFLGLVFLASKIGNNFVAAKNRK  
 KLGLGIYECGPIPVKQANKINSQFFIVALIFILLDIEVVFLFPWALIFKDLGWFGLL  
 VFVFILLLLGVGFLYAYKKGAFWQSIK"  
 gene complement(16520..17185)  
 /locus\_tag="DMACINML\_00750"

CDS complement(16520..17185)  
/locus\_tag="DMACINML\_00750"  
/inference="ab initio prediction:Prodigal:2.6"  
/inference="similar to AA sequence:RefSeq:CAL35677.1"  
/codon\_start=1  
/transl\_table=11  
/product="putative peptide ABC-transport system  
ATP-binding protein"  
/protein\_id="Prokka:DMACINML\_00750"  
/translation="MLEVKNLGKIFYELKKHWYLLKKEKHLIFENVNFSKLENENLMILG  
QSGAGKSTLARILCFLENPSFGEVIYKLNLPKLDKTKQRLRKEIQYCFQDQKAALN  
PYKKIKNLIQDLENFNKKEQEKILKFFDCFNLKKQILEQKPYELSGGEAARVGLIR  
ALILEPRLILDEITSSLDIKNSKEILNFLHHYQQENLISYIFITHQDEFFVNFKCKK  
MKL"

gene complement(17178..17888)  
/locus\_tag="DMACINML\_00751"

CDS complement(17178..17888)  
/locus\_tag="DMACINML\_00751"  
/inference="ab initio prediction:Prodigal:2.6"  
/inference="similar to AA sequence:RefSeq:ADC29128.1"  
/codon\_start=1  
/transl\_table=11  
/product="putative peptide ABC-transport system  
ATP-binding protein"  
/protein\_id="Prokka:DMACINML\_00751"  
/translation="MKVRNLSLKLNQKKIFENISFDIKIAKSLMIVGESVGVKSLGK  
SLIRLLDPKFEINADEWSFNEVSVLNLNQNELRAFRSKVGLVLQDAELSLYPYLDIGN  
LFHLILKTHTKLNQKDYKRYAFDLEKLGFDIDLLWHSYANELSLGMARRVSLALAL  
LSKPQILICDEITASLDKENMQKIIQILKELKNTLGLVCITHDLNLVNSLADEVLFLE  
KNQAQLFKADEFRLIYHA"

gene complement(17885..18640)  
/locus\_tag="DMACINML\_00752"

CDS complement(17885..18640)  
/locus\_tag="DMACINML\_00752"  
/inference="ab initio prediction:Prodigal:2.6"  
/inference="similar to AA sequence:RefSeq:CAL35679.1"  
/codon\_start=1  
/transl\_table=11  
/product="putative peptide ABC-transport system permease  
protein"  
/protein\_id="Prokka:DMACINML\_00752"  
/translation="MFLILGALFAPLLAPFDVLESHLNHLHQAPNLTYYLGADFLGRD  
VFSRLLFALRISLFIGICSSFLSIFLALFYFLARCFFYTFWMRILDLFALPAFLLM  
MFFQSFVGVNIFLMIFLIALVHWPFIARIIESELKRLLENLDFYKASMALGRTKFRAFF  
KDLLPALKSLIFVLFVFNIIHAIATEATLSFFGLGLGFNIPTLGLTLLNESSKAIFIGA  
WWMILFPLLALMFLFLPLLWLGNYLQKIGGVRS"

gene complement(18666..19610)  
/locus\_tag="DMACINML\_00753"

CDS complement(18666..19610)  
/locus\_tag="DMACINML\_00753"  
/inference="ab initio prediction:Prodigal:2.6"  
/inference="similar to AA sequence:RefSeq:CAL35680.1"  
/codon\_start=1  
/transl\_table=11

```

/product="putative peptide ABC-transport system permease
protein"
/protein_id="Prokka:DMACINML_00753"
/translation="MLKRLVFSVFIAFFSTFLCFVLLYFSKGSVAYANKVNSQSKELV
QRIEANLGLDKPLLEQYQIWLFKALKGDLGVSFSLGSEVLKLIKERMANTLILSLSAL
VLLFLLSVFLALLGHYYKESFIDKLITFLAFNFFALPPFVLALFFVLIFGIFWQVLP
TGTSDIGFEDDFNRLEHLILPVLVLSHLALFLRIARNCINETFSQIFVQNLYARA
LREKDIYFLVLRYSLSPIIAYFGGSALSFMMGTYYVESVFAYEGLGSLLFESILFKDF
PMALALIFFSVLLAAFFTFSLSDVFAWILNPRKRLKFV"
gene complement(19610..21148)
/locus_tag="DMACINML_00754"
CDS complement(19610..21148)
/locus_tag="DMACINML_00754"
/inference="ab initio prediction:Prodigal:2.6"
/inference="similar to AA sequence:RefSeq:AHY40756.1"
/codon_start=1
/transl_table=11
/product="peptide ABC transporter, periplasmic
peptide-binding protein"
/protein_id="Prokka:DMACINML_00754"
/translation="MLRWFVLLFLLFFNLEAKIPKDTLIVAVENEISRINPAYSEDHD
AVINLVFSGLTRFDEHMSLKPDLATSWNVSKDGLSYDIFLREDVLWHDGVKFSADDVK
FSLEAFKNPKNNSSVYVNFEDIKSIEILNPYHLKITLSKPFPAFLDALSIGMLPKHLL
SDKDLNTASFNQNPIGTGPYKFKVWKKGEYVEFKANENFYLAQVKTPLRIIKHIFDPS
VASVELKNGKIDAALIDVSLNIFKKDENFKILRERSADYRALMFNLDNEFLKDIQIR
KALNYAVDKQSIVKNLLHDYGFVANHPLERSWADSKAFKTYEYNPKKAQDLILALGFK
KNDEGIFEKDGNI LEFEIWTMSNDPLRVSLAGILQSEFKKIGVIAKVVAKPAGSFDYS
KVDSFLVWGSPLDPDFHTFRVFESSQDSALNNEGWNFGHYHDKKVDIALQKARNTLN
LEERKKYYKEFIDALYENPPFIFLTYLDFALVYNAKLEGIKARNLGHHGVGFTWNIYE
WSKK"
gene complement(21259..24030)
/locus_tag="DMACINML_00755"
CDS complement(21259..24030)
/locus_tag="DMACINML_00755"
/inference="ab initio prediction:Prodigal:2.6"
/inference="similar to AA sequence:RefSeq:AHY40757.1"
/codon_start=1
/transl_table=11
/product="putative D-lactate dehydrogenase, Fe-S protein,
FAD/FMN-containing protein"
/protein_id="Prokka:DMACINML_00755"
/translation="MANFKAFYNEAKYIFKDRIFNDYARCYAYGIDASCYFYIPKIVI
IAKNEDEIKQVIQLAHTYKTPISFRAAGTSLSGQSSCDGVLVVIKFAFKKIKINKDAS
EITLGCVVGIHANESLAFLLKKIGPDPATINSALIGGIINNNSGCMCCGTDNSYKT
LRSIRVILANGSILDTSDALSVAQFKNENKKLINELREIKEEINANKELKDLIIKKFK
IKNTTGYSLNAFVDYDDEIDILAHLLVGSEGLGFVSEVKLAVLDDLEFKACALLFFD
NINNAANTIKEFAKVDFISSAEIMDYASLKAASSYDELRLDILADIKEGDTCVLIQSEH
SNELKLDENINKIKEISKLAYKSYFSKNKAEDLWVKIRKALLPIAASLRKAGSTVIT
EDVCFNIEDLADGIKSIQELFYKYGFSNNGIIFGHALAGNIHFIIITPDLNNKLEFDNF
SNLVKEMSNIVASYGGSIKAHEGTGRMVAPFVEVEWKGQAYL INKKIKSIFDKENLNF
PDV IISDDKDIYKKNIKQASLIDEKLNTECEGFCERFCPSNEYTITPRQRIAILREI
KRLESLNDDSKAKLKDIIKYYNHLVDSSCAACGVCSFSCPLGINFADFSLKRYRNNI
GFMSKILGNLAYKNHEKTLKIAKFSLSIANKFDNLSLDNKLEKASNFLSAIPRTRAYL
PKVNDYELKSRKRAYNVVYFTSCLNKSFKPNEMYDKRSLQEVFESLCEKANIGIYYA

```

```

PNDLCCGKAYENFQDIQDKNIQKINDFLSNIDSPIVLDSACS AKLISDHLKYEIYDL
SEYLLKFIAPKLRIDKINEDVGLYIMCAARKLGLNENI IKLAKLCTNGKVLIDNDTYC
CGFAGYKGFNPKNINATKGFKKFYAKTNIKRGFSTSSTCEIGLS DATGISWQHIA Y
LLDECSEAI"
gene      24194..24616
          /gene="cgb"
          /locus_tag="DMACINML_00756"
CDS      24194..24616
          /gene="cgb"
          /locus_tag="DMACINML_00756"
          /inference="ab initio prediction:Prodigal:2.6"
          /inference="similar to AA sequence:RefSeq:CAL35683.1"
          /codon_start=1
          /transl_table=11
          /product="single domain hemoglobin"
          /protein_id="Prokka:DMACINML_00756"
          /translation="MTQEIQI I KDCVPILQKNGEDLTKEFYKVMFNDYPEVKPMFNM
EKQASGEQPKALAMAILMAAKNIENLENMRSFVDKVAITHVNLGVKKEEHYPIVGACLL
KAIKNLLNPDEATLKAWEVAYGKIAEFYIDIEKKLYEK"
gene      complement(24637..26268)
          /locus_tag="DMACINML_00757"
CDS      complement(24637..26268)
          /locus_tag="DMACINML_00757"
          /inference="ab initio prediction:Prodigal:2.6"
          /inference="similar to AA sequence:RefSeq:CAL35684.1"
          /codon_start=1
          /transl_table=11
          /product="putative ABC transporter"
          /protein_id="Prokka:DMACINML_00757"
          /translation="MPFILELLKQNKFKFISFLLFSFISSAVGVLTLIFINDYLLKNT
QNIPILYFIALLIVFFLSSTIVELGLSVFGQNFIFKMQRVVKQILDTPLLKVAKV GK
ARILASLGS DVRNV SFGLLR LPDFLQSSILILCTSVYLCYLS PQIFTLCAIWIIVVFT
INNF LMMKVYSYFRKAREND DALQNNYQNI LDGHKELLINRYRAKLYEDEFENNARS
KKKNNTLGNLFNLLSNFTNVAL LALVGVEFYLALEFKWASVAEATTIALSILFLRTP
LVSMIGSFPTLLLAKIALDKIAKLELDYKEHF EKTNF IKDWRQISFKNTSFSYDDNF
HLNPVNLELKKGELIFLIGKNGSGKSTFCMLLTGLFKPSEGEIFVDDMKIDDDNLDIY
RSLVSAVFSDFHLFTKTLAKEKFADEEKIASWLEFLELKGKTRVEDHELVLTKLSTGQ
KKRLAMLIALLEERDILVLDEWAADQDPVFRFFYKLLPLLKEQGKTIFAITHDDAY
FDSADRIFLAEEGNISELKGENIKELARNLVEKFD"
gene      complement(26313..27620)
          /locus_tag="DMACINML_00758"
CDS      complement(26313..27620)
          /locus_tag="DMACINML_00758"
          /inference="ab initio prediction:Prodigal:2.6"
          /inference="similar to AA sequence:RefSeq:AHY40760.1"
          /codon_start=1
          /transl_table=11
          /product="L-Proline/Glycine betaine transporter ProP"
          /protein_id="Prokka:DMACINML_00758"
          /translation="MKKSKLGTKEFKILGLSSLGGTLEFYDFIIFVFFAEYIAKVFFP
KDMSEFWTLNNTYGAFAAGYLARPLGGIVMAHFGDKFGRKNMFMLSILLMVLPTFTLA
FIPGYETLGLAPFLILIRIFQGIAIGGELPGAWV FVREHCKESQKAFSL SCLNSAM
ALGILLGSMVFL LINAFFSTEEIAAYAWRIAFFVGGIFGIISIYLRRLQETPIFKQM
QKERSLSSFPLKDLFKEENIFKNTLASIFITWVLTGCVVVLILLMPKFMPSILGLSAI

```

EGSYLQVLGILGITLGGVFMGYLVDKLGLFKICIFFSLVFAFFSCLYFYALYDLKNLV  
 LTCILYTSVCFLGGINVFAPILMSEVFRAKIRFSGISFSYNIAYAIAGGVTPQLVLWL  
 NILATRSKNPFLYGMSMYMIFLALLAICAVFLVKDKINFDRS"  
 gene 27924..28142  
 /locus\_tag="DMACINML\_00759"  
 CDS 27924..28142  
 /locus\_tag="DMACINML\_00759"  
 /inference="ab initio prediction:Prodigal:2.6"  
 /codon\_start=1  
 /transl\_table=11  
 /product="hypothetical protein"  
 /protein\_id="Prokka:DMACINML\_00759"  
 /translation="MMIIVGILGLIISTAVLLACGVFWLFGIVFWGVILAFMLLDLS  
 GSYGVVALYILFIVLNLILIKITRRKK"  
 gene 28139..28573  
 /locus\_tag="DMACINML\_00760"  
 CDS 28139..28573  
 /locus\_tag="DMACINML\_00760"  
 /inference="ab initio prediction:Prodigal:2.6"  
 /codon\_start=1  
 /transl\_table=11  
 /product="hypothetical protein"  
 /protein\_id="Prokka:DMACINML\_00760"  
 /translation="MKKLALALGGIALGACGGKIYQGIKNTWDKLIFKDLITLRKVIK  
 QYEEIEQIYPSYLNLDLKFLEFRKTHKYDTETIYNIKDHLFSDLKKEKLIQIGTTMEAF  
 MEYSDKYLQDDITALKISWKFCAMKLFKFDGALLQLQDVNKMV"  
 gene 28583..28993  
 /locus\_tag="DMACINML\_00761"  
 CDS 28583..28993  
 /locus\_tag="DMACINML\_00761"  
 /inference="ab initio prediction:Prodigal:2.6"  
 /inference="similar to AA sequence:RefSeq:CKH05500.1"  
 /codon\_start=1  
 /transl\_table=11  
 /product="hypothetical protein"  
 /protein\_id="Prokka:DMACINML\_00761"  
 /translation="MQENLKEIYEEFEFLNTQFASYFNDEEFANFKKDFEAKNALNYR  
 DFEEFKLEETDKRRLKDIQECLLAYINFCCSKDIKEKRVEVISKTFMPMF LISRLYFA  
 LKEEKLDMQIRKILKEKDELEEEKSLWISKVLPF"  
 gene 29074..30198  
 /locus\_tag="DMACINML\_00762"  
 CDS 29074..30198  
 /locus\_tag="DMACINML\_00762"  
 /inference="ab initio prediction:Prodigal:2.6"  
 /inference="similar to AA sequence:RefSeq:AJK70711.1"  
 /codon\_start=1  
 /transl\_table=11  
 /product="GTP-binding protein"  
 /protein\_id="Prokka:DMACINML\_00762"  
 /translation="MENKSQENTVDLNAIMSELLQQGQEMYNSSKKQDKLDKLNILII  
 GGTGVGKSTLINTVFGKEVAKTGDGAPVTQAIQKCEKGLCIYDSKGLEKNDP SIVED  
 LKNLLDKQKQKEVSEQIHIAWLCICEATRRVEPLEKELYDLLKQYNFPTIVAITKAMQ  
 NINDKGEKFDEIVKNELKATEVIRIRAIETKLDDDEENILKPMGIKDLLNKSYNLLPE  
 AQQNALARKQIYDRDMKKIQCKKDATSKLNYSTTAGAVAATPIPFSDIALILPTQIA

MIVHISSIYNLDFDKESAKKVTLALVGVCAGFGIRLGVGAALKLIPGLGSLAGGAIN  
 ATVATTATKAMGELYIKYLDDHFDDIENNKSLSFNFEDYK"

gene 30235..30651  
 /locus\_tag="DMACINML\_00763"

CDS 30235..30651  
 /locus\_tag="DMACINML\_00763"  
 /inference="ab initio prediction:Prodigal:2.6"  
 /codon\_start=1  
 /transl\_table=11  
 /product="hypothetical protein"  
 /protein\_id="Prokka:DMACINML\_00763"  
 /translation="MQVKTEEELAKAVNNNENRIEIEGDLAEKVIKIKASGNVAWAVA  
 IGSIGVAVIAIISLKFKNSEKNSQSPKVAFFVASGIGATTAAGAVGVGLGLATTISAIKI  
 AVSGGGKDVLLKLRNYKMEKISDTKIVLKNELLSKG"

gene 30654..30893  
 /locus\_tag="DMACINML\_00764"

CDS 30654..30893  
 /locus\_tag="DMACINML\_00764"  
 /inference="ab initio prediction:Prodigal:2.6"  
 /inference="similar to AA sequence:RefSeq:AAW35817.1"  
 /note="conserved hypothetical protein"  
 /codon\_start=1  
 /transl\_table=11  
 /product="hypothetical protein"  
 /protein\_id="Prokka:DMACINML\_00764"  
 /translation="MFCKLLKAFISNPRSWFLFYRLRKLGFCEIKENFDKETKYSVCK  
 SLDELVKYKNKHPNDFDNFFKIFKEILNDYEKSKK"

gene 30905..31207  
 /locus\_tag="DMACINML\_00765"

CDS 30905..31207  
 /locus\_tag="DMACINML\_00765"  
 /inference="ab initio prediction:Prodigal:2.6"  
 /inference="similar to AA sequence:RefSeq:AAW35817.1"  
 /note="conserved hypothetical protein"  
 /codon\_start=1  
 /transl\_table=11  
 /product="hypothetical protein"  
 /protein\_id="Prokka:DMACINML\_00765"  
 /translation="MYYNKIFSALSLANSFKSTIFKRISPAQSARMIDFALEIKSIF  
 SHNSKDEIPIKILDKLVEYKNKYPNDFDEMFEILKEILDEYEKPNPSEVKKNLSELF"

gene 31209..32306  
 /locus\_tag="DMACINML\_00766"

CDS 31209..32306  
 /locus\_tag="DMACINML\_00766"  
 /inference="ab initio prediction:Prodigal:2.6"  
 /inference="similar to AA sequence:RefSeq:CAL34716.1"  
 /codon\_start=1  
 /transl\_table=11  
 /product="putative ATP/GTP binding protein"  
 /protein\_id="Prokka:DMACINML\_00766"  
 /translation="MQNLLILYNPYQQQDVIKLHLEILLDKGQVAFGKIKSKLKEPLS  
 YEMDENKISHNQKLEIYKNTSADNPLQLFLSDYANL FVAKVVKISKEVDENIIPKYY  
 QEKNLEVEDYFLITDLRELVRENFTLIRDKFLANFTTENNHTYAIYGNNYSYPLVVKQ  
 KEEINYFYDEINKYYLSVYKNQEYLMQENFIQFIFGKFFYMLHPDSINNLILAELE

LQQNLENPLYDFTSIIIVKYSKTIEYEVYDFAKKIFTKLINQNSHLSSINYSVQGKEFN  
 FKQFFINKPNIGTIKFLFKNKEIQELLDKDIKGFINYEFNRTLDEFQTIRNHAVHAKS  
 PTLEQTLKIRNLILGIENTSILKRVLEYKFK"

gene 32318..32488  
 /locus\_tag="DMACINML\_00767"

CDS 32318..32488  
 /locus\_tag="DMACINML\_00767"  
 /inference="ab initio prediction:Prodigal:2.6"  
 /inference="similar to AA sequence:RefSeq:CKG72518.1"  
 /codon\_start=1  
 /transl\_table=11  
 /product="hypothetical protein"  
 /protein\_id="Prokka:DMACINML\_00767"  
 /translation="MIKPKPFLKCKPKCGMFLCTPKSDCLNPSDFFCDKCSGKKDTN  
 LISKIISAIKKV"

gene 32490..33350  
 /locus\_tag="DMACINML\_00768"

CDS 32490..33350  
 /locus\_tag="DMACINML\_00768"  
 /inference="ab initio prediction:Prodigal:2.6"  
 /inference="similar to AA sequence:RefSeq:CAL34717.1"  
 /codon\_start=1  
 /transl\_table=11  
 /product="putative transcriptional regulator"  
 /protein\_id="Prokka:DMACINML\_00768"  
 /translation="MAHDKLAMRLAHILMRFNNGGRFSLEELASEFNVDIRTIQRDLN  
 QRLSFMPIQKENGKYFLESFALGKLSVKDIQNFAMLSGVQELYPKLEDEFITDLLNSK  
 VNSIFMIKNGFEKVDYENFEIISVAILKHNILNFNYKEKSREVKPYKLLNYQGIWYL  
 IADEKDKLKHFTFSKIKNIHKNNEIFTPKEEFLDQILHDKNIWLDDSKEAIVKLDKNA  
 KEYFFRKNILNNFELIDEDEQSYTLKVYFSYDDELLNVVKQWIPYIKIEKPFELKEKL  
 DSILKDYLEN"

gene 33416..33634  
 /gene="infA"

CDS 33416..33634  
 /gene="infA"  
 /locus\_tag="DMACINML\_00769"  
 /inference="ab initio prediction:Prodigal:2.6"  
 /inference="similar to AA sequence:RefSeq:CAL35687.1"  
 /codon\_start=1  
 /transl\_table=11  
 /product="translation initiation factor IF-1"  
 /protein\_id="Prokka:DMACINML\_00769"  
 /translation="MAKDDVIEIDGTVLEALPNANFKVELDNKHVILCHIAGKMRMHY  
 IRIMPGDKVKVELTPYSLDKGRITFRYK"

gene 33921..34286  
 /gene="rpsM"

CDS 33921..34286  
 /gene="rpsM"  
 /locus\_tag="DMACINML\_00770"  
 /inference="ab initio prediction:Prodigal:2.6"  
 /inference="similar to AA sequence:RefSeq:CAL35689.1"  
 /codon\_start=1



```

/transl_table=11
/product="30S ribosomal protein S13"
/protein_id="Prokka:DMACINML_00770"
/translation="MARIAGVDLPKKKRIEYGLTYIYGIGLFTSRKILDKTGISYDKR
VHELSEDEAAAIRKEIQENYMVEGDLRKQVAMDIKALMDLGSFRGLRHRKGLPVRGQK
TKTNARTRKGRKRTVGAKS"
gene 34296..34688
      /gene="rpsK"
CDS   /locus_tag="DMACINML_00771"
      34296..34688
      /gene="rpsK"
      /locus_tag="DMACINML_00771"
      /inference="ab initio prediction:Prodigal:2.6"
      /inference="similar to AA sequence:RefSeq:CAL35690.1"
      /codon_start=1
      /transl_table=11
      /product="30S ribosomal protein S11"
      /protein_id="Prokka:DMACINML_00771"
      /translation="MAKRKIVKKKVVKKNIKAGIVYISATFNNTMVTVTDEMGNAIAW
SSAGGLGFKGSKKSTPYAAQQAVEDALNKAKEHGIKEVGIKVQGGPGSGRETAVKSVG
MEGIKVTFLKDITPLAHNGCRPPKRRRV"
gene 34718..35344
      /gene="rpsD"
CDS   /locus_tag="DMACINML_00772"
      34718..35344
      /gene="rpsD"
      /locus_tag="DMACINML_00772"
      /inference="ab initio prediction:Prodigal:2.6"
      /inference="similar to AA sequence:RefSeq:CAL35691.1"
      /codon_start=1
      /transl_table=11
      /product="30S ribosomal protein S4"
      /protein_id="Prokka:DMACINML_00772"
      /translation="MARYRGPVEKLERRFGVSLALKGERRLAGKSALDKRPPYAPGQHG
ARKGKISEYGLQLREKQKAKFMYGVSEKQFRRLFAEAARRDNGTGVLLIQLLEQRLDN
VVYRMGFATRRFARQLVTHGHILVNGKRVDIPSRVEAGAKIEVIEKSKNNPQITRA
IELTAQTGIVAWVDVEKDKRFGIFTRKPEREEVIIPVEERFIVELYSK"
gene 35358..36371
      /gene="rpoA"
CDS   /locus_tag="DMACINML_00773"
      35358..36371
      /gene="rpoA"
      /locus_tag="DMACINML_00773"
      /EC_number="2.7.7.6"
      /inference="ab initio prediction:Prodigal:2.6"
      /inference="similar to AA sequence:RefSeq:CAL35692.1"
      /codon_start=1
      /transl_table=11
      /product="DNA-directed RNA polymerase alpha chain"
      /protein_id="Prokka:DMACINML_00773"
      /translation="MRNITTSAYTPTEFTIENISDTVAKISAWPFEIGYGITLAHPLR
RLLYTSTIGYAPTAIHIDGVAHEFDSMRGMLDVALFIINLKKLRFKLSKSDSNKEIVE
FSFKGPKEIYGKDLNNDQVEVVNTDAYLATINEDAELKFTLIIIEKGIGYVPSEEIKEL
INDPKFIALDAFFTPVREATYDIEKVLFDNPDYKVVLTVTDDGQITPNEAFQNALE

```

AMYKQLSVFDKITNVRSIKIQATSNELENTKLLQNITDLNLSARSYNCLEKAGIVYI  
 GELALMSVNELAGLKNLGGKSLDEIKSIMESIGFPVGTSKLSDNKDLLKKKIDELKAQ  
 NEG"

gene 36375..36728  
 /gene="rplQ"  
 /locus\_tag="DMACINML\_00774"

CDS 36375..36728  
 /gene="rplQ"  
 /locus\_tag="DMACINML\_00774"  
 /inference="ab initio prediction:Prodigal:2.6"  
 /inference="similar to AA sequence:RefSeq:CAL35693.1"  
 /codon\_start=1  
 /transl\_table=11  
 /product="50S ribosomal protein L17"  
 /protein\_id="Prokka:DMACINML\_00774"  
 /translation="MRHKHGYRKLGRSSHRAALLKNLTIALVNSGKIETTLPKAKEL  
 RGYVERLITRARLGDFAHRAVFAALQDKNATNKLVTETIAPNFKERNGGYTRIIKTRI  
 RRGDAAEMAFIEFVA"

gene 36948..37847  
 /gene="hisG"  
 /locus\_tag="DMACINML\_00775"

CDS 36948..37847  
 /gene="hisG"  
 /locus\_tag="DMACINML\_00775"  
 /EC\_number="2.4.2.17"  
 /inference="ab initio prediction:Prodigal:2.6"  
 /inference="similar to AA sequence:RefSeq:CAL35694.1"  
 /codon\_start=1  
 /transl\_table=11  
 /product="ATP phosphoribosyltransferase"  
 /protein\_id="Prokka:DMACINML\_00775"  
 /translation="MQENSRLRIAIQKSGRLSKESVELLNKCGIKMHIHEQSLIAFST  
 NLPIDILVRDDDDIPGLIFDGVVDLGIIGENVLEENELERKSLGEEANYKLLTKLDFG  
 YCRSLALPQEKKFDNLKDFENLRIATSYPQLLKRFMKENNIHYKNCMLTGSVEVAPR  
 ANLADAICDLVSSGATLQANNLKEVKVIYQSRACLIQKQNTLSSEKQALVDKIMLRVA  
 GVMQARESKYIMLHAPKEKLDKIQSLLPGVEKPTILPLAHDEKNVALHMVSKENLFEW  
 TMEALKEEGASSILVLPKIEKMLK"

gene 37855..39141  
 /gene="hisD"  
 /locus\_tag="DMACINML\_00776"

CDS 37855..39141  
 /gene="hisD"  
 /locus\_tag="DMACINML\_00776"  
 /EC\_number="1.1.1.23"  
 /inference="ab initio prediction:Prodigal:2.6"  
 /inference="similar to AA sequence:RefSeq:CAL35695.1"  
 /codon\_start=1  
 /transl\_table=11  
 /product="histidinol dehydrogenase"  
 /protein\_id="Prokka:DMACINML\_00776"  
 /translation="MQIINFNELDEKQKQEVLRPAIAAKDEISQIVSSIIKEVREKQ  
 DEALIEQALKFDKAQISSIKVSEEELENASSRLDKDLKEAILIAYENIKKFHEAQIPK  
 EVAIETTKGVKCEVLTRPIEKVGLYIPGGLAPLFSTVLMMLAIPAKIAQCEKIVLASPA  
 KINDATLFCAKLCGVDEIYQMGGAGAIALAYGTSVLLKVDKIFGPGNAFVTEAKRQV"

SSDINGAAIDMQAGPSEVLVIADEKANVKFVASDLLSQAHEGADSQVILVCLSKEFAQ  
SASDEVSRQLENLPRKELASKSIANSKIIIAKDLDEALLISNLYAPEHLIIQTQNPRE  
LLDKVKHAGSVFLGELSPESMGDYASGTNHVLPYGLTKTHSSLGLADFSKRMSVQEL  
SKEGFLNLGKSVEILAANEHLDAHKNAVTFRLESLEK"

gene 39138..40199  
/gene="hisB"  
/locus\_tag="DMACINML\_00777"

CDS 39138..40199  
/gene="hisB"  
/locus\_tag="DMACINML\_00777"  
/EC\_number="3.1.3.15"  
/inference="ab initio prediction:Prodigal:2.6"  
/inference="similar to AA sequence:RefSeq:CAL35696.1"  
/codon\_start=1  
/transl\_table=11  
/product="imidazoleglycerol-phosphate  
dehydratase/histidinol-phosphatase"  
/protein\_id="Prokka:DMACINML\_00777"  
/translation="MSEKILFIDRDGTIIIEPKSDFQIDSLEKLRFEKGAIPTLLKLLK  
NFGFKFVLVSNQDGLGTQSFPEKDFEIAHQKMLDILQSCGIEFKDIFICPHFENENCE  
CRKPKTALLDEYIKHNLNKEQSFVIGDRDMDILASNLGVRGLKYSENLTWKEIEEE  
ILNSFRTASISRITKETNIRVKVCLNGRKAIAINTGVPFFDHMLEQIAVHGGIGLEISC  
KGDLEIDEHHSVEDVALALGSAIKQALGDKIGITRYGFVLPMDDECLASCAIDFCNRPH  
LVYKAKFKKEKLGELSTEMIEHFFYSLSYSMGASLHLKVKGKNDHHAEGLFKAFKA  
LKMAVKIESENLASSKGI"

gene 40196..40783  
/gene="hisH"  
/locus\_tag="DMACINML\_00778"

CDS 40196..40783  
/gene="hisH"  
/locus\_tag="DMACINML\_00778"  
/EC\_number="2.4.2.-"  
/inference="ab initio prediction:Prodigal:2.6"  
/inference="similar to AA sequence:RefSeq:AHW92663.1"  
/codon\_start=1  
/transl\_table=11  
/product="imidazole glycerol phosphate synthase subunit  
HisH"  
/protein\_id="Prokka:DMACINML\_00778"  
/translation="MKLIIIDTACANLASLKFCLDRLGFNAKISRDLKDLESADKFLF  
PGVGTAAKAMSNLESFNLTNFIKNTKKPLLGLGICLGMQILGDFSEELDQETLGIMPFT  
QKFELPKEYSLPHMGWNEVASSHPLFKGLNGAYFYFVHSYHVVLNDYTIATSDYGVKF  
SASLAKDNFYGVQFHPERSGEAGEILISNFIKDIT"

gene 40780..41508  
/locus\_tag="DMACINML\_00779"

CDS 40780..41508  
/locus\_tag="DMACINML\_00779"  
/EC\_number="5.3.1.16"  
/inference="ab initio prediction:Prodigal:2.6"  
/inference="similar to AA sequence:RefSeq:ABS43305.1"  
/codon\_start=1  
/transl\_table=11  
/product="1-(5-phosphoribosyl)-5-[(5-  
phosphoribosylamino)methylideneamino]imidazole-4-

carboxamide isomerase"  
 /protein\_id="Prokka:DMACINML\_00779"  
 /translation="MIIPALDLIDGQVRLVKGDYEQKKVYKYPLEKRFREYENAGAT  
 WLHLVDLSGAKDPNKRQLTLEKLANEVSUNLVGGGIRTKEEIQALLDCGVKRVVIG  
 SLAITNPTLCVEILQHFGEAIVLALDITLKDYMIAINAWQDTSKRLLEVFYNI  
 KGLKHILCTDISRDGTMQGSNAELYELIHKNFPKIHTQASGGVASLEDLKKLKGICSG  
 VIVGKALLDGVFSVEEGIKLQNA"

gene 41490..42257  
 /gene="hisF"  
 /locus\_tag="DMACINML\_00780"

CDS 41490..42257  
 /gene="hisF"  
 /locus\_tag="DMACINML\_00780"  
 /EC\_number="4.1.3.-"  
 /inference="ab initio prediction:Prodigal:2.6"  
 /inference="similar to AA sequence:RefSeq:CAL35700.1"  
 /codon\_start=1  
 /transl\_table=11  
 /product="imidazole glycerol phosphate synthase subunit"  
 /protein\_id="Prokka:DMACINML\_00780"  
 /translation="MLTKRIIACLDVKDGRVVKGTQFKNHKDMGDIVELAKRYSQSGI  
 DELVFYDIAASARKERISREWSEVAKNINIPFCVAGGIKSEEDAAELLANGADKISI  
 NSPALNDPDLITRLAKSFGVQCVVVGIDSFKDENGNLKVFKYTGDETSKHSGKNTIE  
 WIKEVQDLGAGEIVLNMNQDGVKNGYDLEQLSLAKKECKVPLIASGGAGKMEHFLEA  
 FKIGVDGALAASVFHQIIDIKELKNYLKTQGVSI"

gene 42260..42883  
 /gene="hisI"  
 /locus\_tag="DMACINML\_00781"

CDS 42260..42883  
 /gene="hisI"  
 /locus\_tag="DMACINML\_00781"  
 /EC\_number="3.6.1.31"  
 /inference="ab initio prediction:Prodigal:2.6"  
 /inference="similar to AA sequence:RefSeq:CAL35701.1"  
 /codon\_start=1  
 /transl\_table=11  
 /product="phosphoribosyl-AMP cyclohydrolase/  
 phosphoribosyl-ATP pyrophosphohydrolase"  
 /protein\_id="Prokka:DMACINML\_00781"  
 /translation="MQNFQNLNEKINWQKVNGLIPVIIQDAKSCEVLMLGFMDEKALE  
 KSLESKKVFFSRTKNRLWMKGEESGNFLNIVDLSLDNDNTLLILVDPIGATCHIGN  
 ISCFENVSKSADFVFLARLEKLINSRKNADENTSYAKLFKKGTKRIAQKVGEEGVET  
 ALAATVKDKDELICEAADLMYHLSVLLADANLSFSDVIAKLKERHKE"

gene complement(43500..44663)  
 /gene="dapD"  
 /locus\_tag="DMACINML\_00782"

CDS complement(43500..44663)  
 /gene="dapD"  
 /locus\_tag="DMACINML\_00782"  
 /EC\_number="2.3.1.117"  
 /inference="ab initio prediction:Prodigal:2.6"  
 /inference="similar to AA sequence:RefSeq:CAL35702.1"  
 /codon\_start=1  
 /transl\_table=11

```

/product="putative
2,3,4,5-tetrahydropyridine-2-carboxylate
N-succinyltransferase"
/protein_id="Prokka:DMACINML_00782"
/translation="MIINTKEDFLLLIKQIEQKNGYRKPKAFGIARLDRGQLNKNKIL
QASFALVNYEQNFGSAAIMLEAFMQRGVEIDFEASEFVQILKLEDIDYALACFKPFLE
EEGHKNIDILKIIKDKFKDDEFVCLFEDKEPLSVESVYLKLYLLSTKKVPLRSLNL
NGAFGLLSNVAWSDDKPIELEYLRENEMRLKMSNQYPKIDFVDKFPFLAHIIPEDNT
RILESSKVRMGASLAAGTTIMPGASYVNFNAGTTGACMVEGRISSSAIVGEGSDVGGG
ASILGVLSGTSGNAISVGKACLLGANSVTGIPLGDNCIVDAGIAVLEGTKFLKLDREE
LAKLNPFDFSKIEYKGIELKGLNGLHFRQDSISGAMIVCLNKKAIKLNEALH"
gene complement(44681..45787)
/gene="mrp"
/locus_tag="DMACINML_00783"
CDS complement(44681..45787)
/gene="mrp"
/locus_tag="DMACINML_00783"
/inference="ab initio prediction:Prodigal:2.6"
/inference="similar to AA sequence:RefSeq:CAL35703.1"
/codon_start=1
/transl_table=11
/product="putative ATP/GTP-binding protein (Mrp protein)"
/protein_id="Prokka:DMACINML_00783"
/translation="MKEQILEKLKSVKYPGFDKDIVSFNFVKDIKIENENVNVELEIV
SSNPQVSEELRKNIDEALASLNLKQLIHIITPKIPEEKSNSRSGKNIAPQVKNFIMV
SSGKGGVGKSTTTVNLAISMAKMGKRVGILDADIYGPNIIPRMLGETKTQPEVVGQRLK
PILSHGVYMMSMGVLIEEGQGLMWRGAMIMKAIEQLLADVIWPELDVFLDMPPGTGD
AQITSAQSIPITAGVCVSTPQTVSLDDSKRALDMFNKLHIPIAGVIENMSGFLCPDNG
KEYDIFGKGTAEEMAKAYKSEVLAQIPIEMIVREGGDEGKPVSYHPESVSAKRYLMA
AEKIWFIEKINNEGGADNSAIQPMNGKSACSH"
gene 45907..47022
/gene="ispDF"
/locus_tag="DMACINML_00784"
CDS 45907..47022
/gene="ispDF"
/locus_tag="DMACINML_00784"
/EC_number="2.7.7.60"
/inference="ab initio prediction:Prodigal:2.6"
/inference="similar to AA sequence:RefSeq:CAL35704.1"
/codon_start=1
/transl_table=11
/product="2-C-methyl-D-erythritol 4-phosphate
cytidyltransferase/ 2-C-methyl-D-erythritol
2,4-cyclodiphosphate synthase"
/protein_id="Prokka:DMACINML_00784"
/translation="MANLSLIMLAAGNSTRFDMGVKKQFLRLGDDPLWLAYATRNLSF
YPFKIVTSSNTSYMKKFARNYEFVEGGATRAESLKKALEAIDSEFVMVSDVARVLV
SKSLFDRLIENLDKADCITPALKVADTTLFENEALQREKIKLIQTPQISRTHLLKQAL
NQNLDFDSTAIAMGGKIWFVEGEENTRKITFKEDLKKLDLPRPSNEIFCGNGFDV
HEFGEERPLLLGGVEIHPTMGLKAHSDGDLAHS�TDAILGAACLDIGELFPDTEK
FKNANSMNLLKEAYKRVKELGFELVNVDICVMAQTPKLKDFKEAIAQNIANTLNIDEF
RVNIKATTTEKLGFIGRKEGMAVLASANLKYFDWTKI"
gene 47019..47906
/locus_tag="DMACINML_00785"

```

CDS 47019..47906  
/locus\_tag="DMACINML\_00785"  
/inference="ab initio prediction:Prodigal:2.6"  
/inference="similar to AA sequence:RefSeq:CAL35705.1"  
/codon\_start=1  
/transl\_table=11  
/product="putative two-component regulator"  
/protein\_id="Prokka:DMACINML\_00785"  
/translation="MKVLIENEIYLAQSSISIKLSDVGYSCEIINSFDERNPEKYYDI  
ILLSTNTSNFLKAVTEFKHSIIILLISYISTDTVSNPLKLGACDYIQKPFMIEELIRK  
IKHYQDFKLSILNKAYKSYIKSRLETVKIPEYNYKKLKLPPVVLKSNKQSSADAFVFN  
YINEYDITLSYVDLSVNSVEKAMKLPTEENLLFLSNFQVLKPLEREKLLLEFIKNKSV  
ILHTNSNIEDLELPCINLNDNEKNIDSNQILTIDEYVKYIILNYQNVFPDLDLSSKLG  
ISRKSLWEKRKKYEISKKK"

gene 47884..49044  
/locus\_tag="DMACINML\_00786"

CDS 47884..49044  
/locus\_tag="DMACINML\_00786"  
/EC\_number="2.7.7.4"  
/inference="ab initio prediction:Prodigal:2.6"  
/inference="similar to AA sequence:RefSeq:CAL35706.1"  
/codon\_start=1  
/transl\_table=11  
/product="putative sulfate adenylyltransferase"  
/protein\_id="Prokka:DMACINML\_00786"  
/translation="MKSAKKNKSIVIDKNELGILSLIKEGLLGSCSTHLMDEHETKQIL  
KTGKSDKESFPYPLSFAPKISEEFIKDIRIGSKIDLILNDETGVNITLKSFKNDKNF  
SNIFSPHTCSLDNMGEICIGGEIEIYNSTIQKIKEEFHKTKENLNAHKITAIVSSFD  
LHRAHERMFRWTIDKADLVVFLVSEFDANGFDLQNYLKKFIQNYLPPDRIFIFP  
LKDINLFHAHLNPSLESILAKSLGCTKLVGQNHTGLGMFYDDNQPKTILDDFSKDYD  
IEVIVLPEFVFCACRMIVSTRSCPHGCHHHLHYNSQSLKELLRAGIIPPAVFMRKEV  
SSIILSSIFPNRFKNLQKIYNDLFATDGILEYKSDEEFYQKLETHQMSYVM"

gene 49054..49554  
/gene="pgpA"

CDS 49054..49554  
/gene="pgpA"  
/locus\_tag="DMACINML\_00787"  
/EC\_number="3.1.3.27"  
/inference="ab initio prediction:Prodigal:2.6"  
/inference="similar to AA sequence:RefSeq:CAL35707.1"  
/codon\_start=1  
/transl\_table=11  
/product="putative phosphatidylglycerophosphatase"  
/protein\_id="Prokka:DMACINML\_00787"  
/translation="MQKLFLTFYSGCAKKAPGTFGTLAALIPAFFILKYLGITTFL  
LSILIFIASIRVIDDYERKTGIHDDKHIVIDEVAGVFLACAI AASGANSLLNFFMAFV  
FFRIFDITKPSIIGKIDKKTGGGLGVMLDDMLAGL FAGLLSAVIYGFLLKLDLVFWDK  
DLINLF"

gene 49631..49894  
/gene="rpsT"

CDS 49631..49894  
/gene="rpsT"

```

/locus_tag="DMACINML_00788"
/inference="ab initio prediction:Prodigal:2.6"
/inference="similar to AA sequence:RefSeq:CAL35708.1"
/codon_start=1
/transl_table=11
/product="30S ribosomal protein S20"
/protein_id="Prokka:DMACINML_00788"
/translation="MANHKSAEKRRARQTIKKTERNRFYRTRLKNITKAVREAAKNDK
NAANEALKIANKSIHAMVSRGFLKKQTASRRVSRLLALLVNKIA"
gene 49911..50978
/gene="prfA"
CDS 49911..50978
/gene="prfA"
/locus_tag="DMACINML_00789"
/inference="ab initio prediction:Prodigal:2.6"
/inference="similar to AA sequence:RefSeq:CAL35709.1"
/codon_start=1
/transl_table=11
/product="peptide chain release factor 1"
/protein_id="Prokka:DMACINML_00789"
/translation="MLASKLDPFLKRFEELNSLLSSSDIISDISKMTALSKEQKNLEP
IVLKAKEYLKTLDSEENKTLNDAELGELAKEELKNLEELKPKLEELKILLLPKDP
NDERNIFLEIRAGTGGDEASLFGDLVKAYARYAENRGYKLEIVSSSEGSVGGFKEII
MLVKGAGAFSRLKYEGGTHRVRVQPTESQGRIHTSAITIAVMPEVDDIEIEINPNDL
KIDVMRSSGHGGQSVNTTDSAVRITHLPTGIVVVNQDGKSQHKNKESAMKVLKARLYE
MQESERLAQESEARKSQVSGDRSERIRTYNFPQNRISDHRINLTLYRLDAILQDGLF
DEVIEPLIAHYQAESLQEQNL"
gene complement(51009..51764)
/locus_tag="DMACINML_00790"
CDS complement(51009..51764)
/locus_tag="DMACINML_00790"
/inference="ab initio prediction:Prodigal:2.6"
/inference="similar to AA sequence:RefSeq:CAL35710.1"
/codon_start=1
/transl_table=11
/product="putative pyridoxamine 5'-phosphate oxidase"
/protein_id="Prokka:DMACINML_00790"
/translation="MSFESIISHMNDHHQSNLIDLCKKFGAVKDPKEVRLVGVDFEGL
DIAYNDNENLRIEFPKKANEETLKDAIIALCMSAKTKKDLSGVAKEAKEFMLSFNVS
LATLNADKEVVCSYAPFVNTSWGNYIYISEVSEHFNNIKENPNNIEIMFLEDESKAAS
VILRKRLRYRVKASFIERGEMFDKIYDEFEKQTGGEGGIKTIRNMLDFHLVKLEFQKG
RFVKGFGQAYDIENENVTHVGANSSPHKFPKH"
gene 51969..54074
/locus_tag="DMACINML_00791"
CDS 51969..54074
/locus_tag="DMACINML_00791"
/inference="ab initio prediction:Prodigal:2.6"
/inference="similar to AA sequence:RefSeq:AHY40787.1"
/codon_start=1
/transl_table=11
/product="TonB-dependent heme receptor"
/protein_id="Prokka:DMACINML_00791"
/translation="MNPSKRVLKLSELLVFLNLSINAQELNDNIQMVKVVVSATGFEQ

```

DADNNLRNVIVIDGKDLKRGFNTLEQALERISGISFVNFGLGRNIDMRGQGSKSANIA  
VKVMVNGNAINVLDNSHGVTPLSINLNNIERIEIIPGGGSVLYGNGTRGGVINIITK  
KEKSDAFALNLKGSSYDHGNLGGNLGVYGAKKINDYLTFFGFDIQGFNRDGYQEGYNQK  
GYFANTKAYLNTSDNSDLTLNRYNFESKNTSSGYLTKAQVQSDPTQKGNSDNITQINR  
PEIALDYHHYFSDLYEIQLGAFWQNKIRYLKDEIPMMGTIAYQTGSGFEDTLTGINL  
KNKINYKDDSYFIFGYEFANHDAKRTSIVHYNVPVIQMSHTMTTLMMDMKQSHSIFAL  
DSHQFNDFISISGGARYEYSLYDTHRNYTSKMIMGGRPLPSNPELFDTDDTSNNFALE  
ITPNFKYSDTGNIYAKYERGFISPTPAQLVNKDQANQKYTTANLDPEIFDTFELGIND  
FWWDFYGFNLFFYTLKDEISYLGPHATGGAFWKYYNIDQTRRLGAELNLSQFLFS  
DSLILKESLSYLDKISKGVNDGLRIPYVSKIKATAGVEYAWNKNFSSYIDLSYFSRA  
KGGVVDENTGKMSRNSWIKDYFLTDIGVNYNRNLQILAGIRNLFDKQYYTYQDSIN  
DEYLAGNGRNYYVEFKYAF"

sig\_peptide 51969..52040  
/locus\_tag="DMACINML\_00791"  
/inference="ab initio prediction:SignalP:4.1"  
/note="predicted cleavage at residue 24"

gene 54034..55035  
/gene="chuB\_1"  
/locus\_tag="DMACINML\_00792"

CDS 54034..55035  
/gene="chuB\_1"  
/locus\_tag="DMACINML\_00792"  
/inference="ab initio prediction:Prodigal:2.6"  
/inference="similar to AA sequence:RefSeq:ABV53113.1"  
/codon\_start=1  
/transl\_table=11  
/product="putative hemin transport system permease protein"  
/protein\_id="Prokka:DMACINML\_00792"  
/translation="MAEITMLNLMRSKNLVIIGLFLAYIITCIIALCLGDENLSPKE  
LLSYAFGENEILRQIIIDGRLPRIIMAILIGMLLASSGAVTQNVFSNPIADPYIIGIA  
SAATFGSVLAYLLKLPDYYYGILGFVCSAIFSLAIFKVSSKASIATLLIIGIAASSFL  
GAFTSFFTYLIGEDSFKIVAWLMGNIGSASWFRIGILILPLIFCLLYFYAHKNELNII  
LSGDDEARNLGVDAQKLKINLLIVSSLAVSFAVAFTGLIAFVGLIIPHTVRLLLRNYD  
NALVIPFCTAFGGLFLLICDTLARTLIAPVQIPIGVLTAFFGAPVFLYLALSARRFL"

gene 55032..55811  
/gene="chuC"  
/locus\_tag="DMACINML\_00793"

CDS 55032..55811  
/gene="chuC"  
/locus\_tag="DMACINML\_00793"  
/inference="ab initio prediction:Prodigal:2.6"  
/inference="similar to AA sequence:RefSeq:CAL35713.1"  
/codon\_start=1  
/transl\_table=11  
/product="putative hemin uptake system ATP-binding protein"  
/protein\_id="Prokka:DMACINML\_00793"  
/translation="MILKIQNLSFSYHKKELLKNINLELQNKAFIGILGPNNGSKSTL  
LKLILKNLNISKGEISLFTDIKNFSLKEFAQLCGFVPQNSGLNTPKVIDVLLMSKF  
TNLKHAFCDYSKEDILEVENFAKTLKLENFLERNILSLSGGEFQRVLLARALLKKPKI  
LFLDEPTSALDLNHAIELLSLCERLIKQNNIAVVAILHDLNLAASFCDKVLFLKEGEI  
KYFGSTKELFTKEILKEIYNLCEIVYKDLKPYILALKEKI"

gene 55808..56614



/gene="chuD"  
 /locus\_tag="DMACINML\_00794"  
 CDS 55808..56614  
 /gene="chuD"  
 /locus\_tag="DMACINML\_00794"  
 /inference="ab initio prediction:Prodigal:2.6"  
 /inference="similar to AA sequence:RefSeq:CAL35714.1"  
 /codon\_start=1  
 /transl\_table=11  
 /product="putative hemin uptake system periplasmic  
 hemin-binding protein"  
 /protein\_id="Prokka:DMACINML\_00794"  
 /translation="MKKILIIIMSLFLTLNAKERIVVLDPASIELTFMLNAQDQIVGI  
 ANLQHSNIYPEEKTSKITSVGTFSHPSELEKIVALKPSLVILSSYSLNLEEGLKNFGIK  
 SINLKAQRLDEIKNNIQLAELTNKEEQGKLLLEFEQGLQELQKNPLNKSIGIYLYSS  
 NPLMAFNDNSLIADILRLIGIKNLSQSEIARPIISA EYILKQNPDLILGINADGNI  
 LDTNALLKNTKAAQMGQIYHNKNTHILLRLSPKIIDRIKEFKTRLENQNF"  
 gene complement(56611..57468)  
 CDS /locus\_tag="DMACINML\_00795"  
 complement(56611..57468)  
 /locus\_tag="DMACINML\_00795"  
 /inference="ab initio prediction:Prodigal:2.6"  
 /inference="similar to AA sequence:RefSeq:CAL35715.1"  
 /codon\_start=1  
 /transl\_table=11  
 /product="putative radical SAM domain protein"  
 /protein\_id="Prokka:DMACINML\_00795"  
 /translation="MKFKKLYIELSDICGLKCDFCPSKKALRGVMSVENFSKLAKQIW  
 DKSEIFTFHLLGDPLLLNLEEYLQIAKNHQMKLEITTSGFYFSPKNSKLLLYDNIH  
 QINISLMAFLSQNKLSLEQYFKPILEFCKEHLEYKKPSFINLRLWNLDTDFKAPSEN  
 PIYEFLSKEFGVQILTHLAKNRLQRHILLHQNKLFKWPSLKDPLYTQGGKCHALKEQI  
 GILSDGTLVPCCLDTQGDIPLGNVFNAEFKSLLDKRIQEIKAFFENKRIEKLQCS  
 EFFKTRLS"  
 gene 57638..58900  
 /gene="kgtP\_1"  
 CDS /locus\_tag="DMACINML\_00796"  
 57638..58900  
 /gene="kgtP\_1"  
 /locus\_tag="DMACINML\_00796"  
 /inference="ab initio prediction:Prodigal:2.6"  
 /inference="similar to AA sequence:RefSeq:CAL35716.1"  
 /codon\_start=1  
 /transl\_table=11  
 /product="alpha-ketoglutarate permease"  
 /protein\_id="Prokka:DMACINML\_00796"  
 /translation="MQELTRAKKIRSIVAASSGNLVEWDFYIYAFTATYFAHTFSTS  
 DNPIVQQINAFGVFAAGFFMRPIGSWLFGLADKVGRRKSMVSVVLMALGSFMIAAL  
 PSKDVGDFAIILLLLARLIQGLSVGGEGIAATYLSLATEGKRGFYSSFYVTLIG  
 GQLLAVASISIMLFFSIDEMKDYAWRILFVVGILALGSLLVKVMNESATQIHKHD  
 DRGTLKALFTSSWKQFLMVLGITAGGSLAFYTTITTYTKTFMENSMDKTLVNNLFLGA  
 LFILMIIQPLFGYIGDKIGHKRSIIIFCILAFVGIYPIFNLISSNAQSNSSLVFILV  
 LLFIILSFYTSVAGIFKAKLFPEHVRALGTGLGYAISNAIFGGSAPWVALQFKNAGME  
 NGFFVYIAVLTLLMFIATLCLPKKSELN"  
 gene complement(58886..59905)

CDS /locus\_tag="DMACINML\_00797"  
 complement(58886..59905)  
 /locus\_tag="DMACINML\_00797"  
 /inference="ab initio prediction:Prodigal:2.6"  
 /inference="similar to AA sequence:RefSeq:AHW92684.1"  
 /codon\_start=1  
 /transl\_table=11  
 /product="A/G-specific adenine glycosylase"  
 /protein\_id="Prokka:DMACINML\_00797"  
 /translation="MQKQMIQDLQVKLLLWYDKNGRKNLPWRNLQSKDCDERLKDIDR  
 AYGVISEIMLQQTQVKSFLERFYFPFLQKFPTLQSLAKANEDLLKAWQGLGYYTRA  
 RNLKKSALCVDKFEGLPKKLDLKKLSGIGAYTAGAIACFAYDQKVSFVDGNIRRV  
 LSRLFALENPKMNERKAKELLNLEDAFNHNQALLDIGALICVSKNAKCGICPLYDF  
 CQGFNTELYPKAKKISYENASLNLFIWGWKFAIQKSQDKLYKGMYNFPFFKEEEG  
 EISKNMKFLGEFKHNYTKYKLNLIKVYHQILKEENKNYQFKSLKELESTALSILSLKAL  
 RLIKL"

gene 60230..60865  
 /locus\_tag="DMACINML\_00798"

CDS 60230..60865  
 /locus\_tag="DMACINML\_00798"  
 /inference="ab initio prediction:Prodigal:2.6"  
 /inference="similar to AA sequence:RefSeq:AII23819.1"  
 /codon\_start=1  
 /transl\_table=11  
 /product="hemerythrin family protein"  
 /protein\_id="Prokka:DMACINML\_00798"  
 /translation="MDHHKLIPLWDERYNINHQKIDTQHQLFELAAQVENAVFKFVK  
 RDELKEILTELFTYMKEHFHDEEEFMQEIRYPRLYEHKQMHKNIVHEMSQLIQNIKST  
 NDLKEKLYSIMSNWLSRHILSHDVMIIAWVNENLKKDENKTLELNDLPPKQILTQEEN  
 FEFYSCPKIDHRLSFKEHESIANEGKIMRCKKQELLFFIRSQEKTYKG"

gene 60869..61465  
 /locus\_tag="DMACINML\_00799"

CDS 60869..61465  
 /locus\_tag="DMACINML\_00799"  
 /inference="ab initio prediction:Prodigal:2.6"  
 /inference="similar to AA sequence:RefSeq:CAL35339.1"  
 /codon\_start=1  
 /transl\_table=11  
 /product="putative iron-binding protein"  
 /protein\_id="Prokka:DMACINML\_00799"  
 /translation="MLPKWDKIYSVHNGKIDNQHKKLFELAAKVEHIFDKPVHRDEIK  
 ALLTDFFNMYKHFDDEEKYMQFIRYPDFERHRQIHKEIIQSMIKI IQNIKTNDLKE  
 KLYIMVKKWLEHILYEDMRVEQWRIGLSSENGADITFEEIKDDEEEAVIYFYACEC  
 IGQIHDVPSGIHKKIQNEGAKFKCKKCKFPLEFFKKG"

gene 61518..62276  
 /locus\_tag="DMACINML\_00800"

CDS 61518..62276  
 /locus\_tag="DMACINML\_00800"  
 /inference="ab initio prediction:Prodigal:2.6"  
 /inference="similar to AA sequence:RefSeq:CAL35718.1"  
 /codon\_start=1  
 /transl\_table=11  
 /product="putative periplasmic protein"  
 /protein\_id="Prokka:DMACINML\_00800"

```

/translation="MLAFFKGLGIGFLCLVLFIAGVIFNVEFLNKNKTTQTLNFSRSI
ETSMEAKPDIFRANINFWANENLSTQTFLSNEDKIQISNTFNQILERSKKENFCSGGS
FSLEPNFSYKDGVTQPKGQRLHANLECEFKADKLEDFNKLNDLNSIIAKSEFIGIST
PALEPKFSKQTLKDNKEKLYSELLKKAYSYENIYSLDLNKTICILKNLNIESIPNFYPR
ALNSMKSADNMELSLPIIKDEEQSISGTALFICK"
gene      62335..62409
/locus_tag="DMACINML_00801"
tRNA     62335..62409
/locus_tag="DMACINML_00801"
/product="tRNA-Gly"
/inference="COORDINATES: profile:Aragorn:1.2"
/note="tRNA-Gly(gcc)"
gene     62420..62508
/locus_tag="DMACINML_00802"
tRNA     62420..62508
/locus_tag="DMACINML_00802"
/product="tRNA-Leu"
/inference="COORDINATES: profile:Aragorn:1.2"
/note="tRNA-Leu(taa)"
gene     62530..62603
/locus_tag="DMACINML_00803"
tRNA     62530..62603
/locus_tag="DMACINML_00803"
/product="tRNA-Cys"
/inference="COORDINATES: profile:Aragorn:1.2"
/note="tRNA-Cys(gca)"
gene     62635..62722
/locus_tag="DMACINML_00804"
tRNA     62635..62722
/locus_tag="DMACINML_00804"
/product="tRNA-Ser"
/inference="COORDINATES: profile:Aragorn:1.2"
/note="tRNA-Ser(tga)"
gene     62800..63129
/locus_tag="DMACINML_00805"
CDS      62800..63129
/locus_tag="DMACINML_00805"
/inference="ab initio prediction:Prodigal:2.6"
/codon_start=1
/transl_table=11
/product="hypothetical protein"
/protein_id="Prokka:DMACINML_00805"
/translation="MKKFILISSILSSFFVFTQASELPGDEIQPEVKAIKEHFCKDQVE
KVEFEAWAKGMGLNFSTQKYLNNQNYKKYAKTMAKLIRKTRGVKKGVEICYEGTPQKR
VHKCNKF"
sig_peptide 62800..62862
/locus_tag="DMACINML_00805"
/inference="ab initio prediction:SignalP:4.1"
/note="predicted cleavage at residue 21"
gene     63223..64311
/locus_tag="DMACINML_00806"
/locus_tag="DMACINML_00806"
/locus_tag="DMACINML_00806"
CDS      63223..64311
/locus_tag="DMACINML_00806"
/locus_tag="DMACINML_00806"
/locus_tag="DMACINML_00806"
/gene="trxB_2"

```

```

/locus_tag="DMACINML_00806"
/inference="ab initio prediction:Prodigal:2.6"
/inference="similar to AA sequence:RefSeq:CKG86610.1"
/codon_start=1
/transl_table=11
/product="thioredoxin reductase"
/protein_id="Prokka:DMACINML_00806"
/translation="MFKIVLLISIIIFGLNACKGEDMNNNEDTNKDIKTVYAPNAVGID
LNTKTNEFLFNQRKKPTGKYTKKEYTKALLEAVNIVDNSPYKKFYEPKYLDPEFHTGQK
STLIEFKEWQSIYKDPVKGSLAPWTKAEKAYNSLDGEGRYNYLVKRSGLVCTPIDL
KDSALIRPKRPKEKRFINAYKEGMKDYKEAKRLDYKGYDLFQKAIKNLSYAYEEGKDY
KAGLALAEELGYSKDYFRAIIGKLDQDENNEVLLDKLINEFLNANYRSIRIYEELIEKY
DLGDAYWGLYVYSRKIEDTVFDDRFYFAQLKDSSEELYKNAFEHGAYGAFGAKANTIY
SDLIAGEYQLCLGILGNKKAFFEASCIS"
gene 64289..64981
      /gene="trxB_3"
CDS   /locus_tag="DMACINML_00807"
      64289..64981
      /gene="trxB_3"
      /locus_tag="DMACINML_00807"
      /inference="ab initio prediction:Prodigal:2.6"
      /inference="similar to AA sequence:RefSeq:CKG86610.1"
      /codon_start=1
      /transl_table=11
      /product="thioredoxin reductase"
      /protein_id="Prokka:DMACINML_00807"
      /translation="MKQAVYLSDSLKSRFQALWLGVLGDEKCLEGLYHPLYGIHE
NPLKRQLMKDFAKNPPYDKYGMLPFLDELISTEWIIDPNEYNFYDINNRVVTAMLNG
IDKGKYKDPDVDSTPESRWEFDQEIDAYKEGSVRSYSYDLPNHWSEADVEIYLEELY
LHAKLAALTPPQGYPNAPRYYSERLEFIYEKHKLDAKLDPRIPAIYRANFPEELRAK
IRAFKEHGIEE"
gene 64983..65963
      /gene="ribD"
CDS   /locus_tag="DMACINML_00808"
      64983..65963
      /gene="ribD"
      /locus_tag="DMACINML_00808"
      /EC_number="3.5.4.-"
      /inference="ab initio prediction:Prodigal:2.6"
      /inference="similar to AA sequence:RefSeq:CAL35719.1"
      /codon_start=1
      /transl_table=11
      /product="riboflavin-specific deaminase/reductase"
      /protein_id="Prokka:DMACINML_00808"
      /translation="MKNFYMNLALNEAWKYQFLTYPNPAVGCVILDKNEKILAIKAHE
KAGCAHAELNAIAHAFTSLNPEISLPQEANAMHEFICKNHRGIFKDSIAFVTLEPCSH
QGKTPPCAFLFSELGFKKVFISVKDENEIASKGADFLKKQGVIEIEFGVLEDEGKLLK
PFLKWQKQFKLFLKLSMNGSPFGKIVSNELSRTYAHKIRSVIDLLVLGGETIRKDR
PILDARLCKGKAPNLCILSHHNLENFDKSIPLFNVPHRQIYTHIPNKAFLMYEGGEN
FLKNFKDEMDFLIFQSSSLNDEKNVTMSLNFKPLYRNFLGSDTYGIYEL"
gene 65944..66465
      /locus_tag="DMACINML_00809"
CDS   65944..66465
      /locus_tag="DMACINML_00809"

```

```

/inference="ab initio prediction:Prodigal:2.6"
/inference="similar to AA sequence:RefSeq:CAL35720.1"
/codon_start=1
/transl_table=11
/product="putative membrane protein"
/protein_id="Prokka:DMACINML_00809"
/translation="MAFMSFSGFFYARNDLRLFKIEKKNEIKSFFYKDYTLASFKDEL
NLNNEIFFYQSLKENLFKENDEILISNLGKKIILFRNFTQNSDNFAEAKLKQVLLLTFL
FLASVFFASLAINEFGAIDLVLMIICLLLLVMGIINLGLLFFKQIRILKSFSEEMK
EFLTQRMKKYTKK"
gene complement(66524..67888)
/gene="tdcG"
/locus_tag="DMACINML_00810"
CDS complement(66524..67888)
/gene="tdcG"
/locus_tag="DMACINML_00810"
/EC_number="4.3.1.17"
/inference="ab initio prediction:Prodigal:2.6"
/inference="similar to AA sequence:RefSeq:AJA55834.1"
/codon_start=1
/transl_table=11
/product="L-serine dehydratase TdcG"
/protein_id="Prokka:DMACINML_00810"
/translation="MSNLNIFKIGVGPSSSHTLGPMLAGNLFCKKIAKKLEKIEKIQI
ILYGSLSLTGKGHLSDKAVIWGLNALEAKNLSAAIQEEVNKNATDKGKINLCGEKELR
FDYEKDLIFSDFLPLHENGMQIQAFNASGEIVDQETYYSIGGGFVLTAEELEKRNKG
ISQGRKKLDIELNNAKQALELCEKRDWDLAELSYRYELQFHTKEEIRSYCLEIWEVM
QEVYYNGTHPNEDYLPGLHLKRRAKGLKERVMTADPMGIIDFISLYAIAIAEENAS
GAKVVTAPTNGACAVIPAVMLYLKNHTIGFNDEKAIIEFLVAMLIGSFYKKNASISGA
EAGCQAEIGSASSMAAGAMATVLGANAFKACNAAEMAMEHHLGLTCDPVGGLVQIPCI
ERNAFGAIKAIISAARMAMTRKSIPIVSLDEVIETMYETGKDMNYKYKETSLGGLATNL
KTVK"
gene complement(67899..69221)
/locus_tag="DMACINML_00811"
CDS complement(67899..69221)
/locus_tag="DMACINML_00811"
/inference="ab initio prediction:Prodigal:2.6"
/inference="similar to AA sequence:RefSeq:ABS43832.1"
/codon_start=1
/transl_table=11
/product="serine transporter"
/protein_id="Prokka:DMACINML_00811"
/translation="MNTPKWTRYDTRWVLSLFGTAVGAGILFLPIKAGVGGFWPVIAM
AVIIFPMVYLSHRALSFRVVSQANGNDKDITHAAEEYFGRGVSIFISVLYFFAIFPICL
AYCVGITNTFESFIYHQFLPLLNSEGVFADIIRAMYEVSAADKGGVVASLFPFYRLLL
AFILVSIFMLIMLFSEELITKVCEWLVPPLCAILFIFSLYLIPQWSFESFSAIPGVKE
FITIVWLTLPVLVFSFNHSPAISTFSLSVKRQYKEHAVEKADQILFRTSTMLLFFVMF
FVISCVLSLSPAELNEARAQNIPVLSYFANKLDNPFISYGGPLIAFLAISSSFFGHYF
GAREGAYGIVRKCKLAGSENPDLLKIAICSTLVMIIMLITAYINPSILVFIESLGG
PIIAAILFLMPIIAIYTVSKMKKFQNKALDAFVFTGVLTIITVIYTF"
gene complement(69491..69907)
/locus_tag="DMACINML_00812"
CDS complement(69491..69907)
/locus_tag="DMACINML_00812"

```

```

/inference="ab initio prediction:Prodigal:2.6"
/inference="similar to AA sequence:RefSeq:CAL35723.1"
/codon_start=1
/transl_table=11
/product="putative periplasmic protein"
/protein_id="Prokka:DMACINML_00812"
/translation="MKLKLGLAALLGATVLFARDIIVPASELPRNAQDFISKNFKTAQ
IALVKKDIDSYDVTLNDGTEIDFIITGEWKDVDGKYKALPNSILPNIMPKISASSNAQ
IIEVSKEINGYKFELSNQLKIYTDAQGNILGQKFDY"
sig_peptide complement(69851..69907)
/locus_tag="DMACINML_00812"
/inference="ab initio prediction:SignalP:4.1"
/note="predicted cleavage at residue 19"
gene complement(69976..70713)
/locus_tag="DMACINML_00813"
CDS complement(69976..70713)
/locus_tag="DMACINML_00813"
/inference="ab initio prediction:Prodigal:2.6"
/inference="similar to AA sequence:RefSeq:CAL35724.1"
/note="hypothetical protein Cj1627c"
/codon_start=1
/transl_table=11
/product="hypothetical protein"
/protein_id="Prokka:DMACINML_00813"
/translation="MQENHNFISFVLLDEAKFDLKLKILEDDFDIWIADENFTQDG
VIFSFKNMLITLNLIKNPIPNNEAEYYANFNFMWKDALEQTQKHKAHLLISVLSQSET
KLDQAKLFTQISSVCLQDKHALGFYTGGVLEPKFYIENAKMLEDNRLPVYVNWIIYVSV
YPGDNGNAYTYGLRNFDKLELEVCDANIEEKELFFTLYDIILHILTYDLTLKDNNTL
KFEDGRILSFKKSQGIGVENESLKIIF"
gene 70880..71305
/locus_tag="DMACINML_00814"
CDS 70880..71305
/locus_tag="DMACINML_00814"
/inference="ab initio prediction:Prodigal:2.6"
/inference="similar to AA sequence:RefSeq:EAQ72747.2"
/codon_start=1
/transl_table=11
/product="TonB system transport protein ExbB"
/protein_id="Prokka:DMACINML_00814"
/translation="MEFLKDYIDLIIIFIILGVMAFIAFWCVIERVLFRRKIDFKNYEN
QEQFDDAISENLTTIYIIYSNAPYIGLLGTVVGIMITFYEMGIAGNIDVKSIVVGLSL
ALKATALGLLVAIPALMAYNALLRKVSLLSNAYKVSUNA"
gene 71298..71687
/locus_tag="DMACINML_00815"
CDS 71298..71687
/locus_tag="DMACINML_00815"
/inference="ab initio prediction:Prodigal:2.6"
/inference="similar to AA sequence:RefSeq:AAW36224.1"
/codon_start=1
/transl_table=11

```

```

/product="biopolymer transport exbD protein"
/protein_id="Prokka:DMACINML_00815"
/translation="MLKLPKNEGLNIVPFIDIMLVLLAIILSISTFIAHGKIEINLPV
SENALSLNNDKLLSISIDENNIFYLDDKTTDLKGLSDAISLHKKTIVELKSDKNAK
FESFVQIIDLLKAKEHENFQIITEKNR"
gene 71684..72367
      /gene="tonB2"
CDS   71684..72367
      /gene="tonB2"
      /locus_tag="DMACINML_00816"
      /inference="ab initio prediction:Prodigal:2.6"
      /inference="similar to AA sequence:RefSeq:CAL35727.1"
      /codon_start=1
      /transl_table=11
      /product="putative TonB transport protein"
      /protein_id="Prokka:DMACINML_00816"
      /translation="MKNALSNHKSQAFYISFLFLLPLAFLLFNSANFFKIEFKSEDSF
TLAMKQFTQNQPTQTPIPTNSEPIQHHPKPKPIKQPIKKTCKAAENQVKPIQAINPIQ
KSTPFIAQTHHTHNQALKNSDAKPTQLTYGKDNHPALEKIQKAIMEQARKNYPRQARK
MRMQGVVEVEFLWKENKSLAELKIIQSSGHNLLDKSALESIRKASAFFPYYQSDLRIV
LPIVYNLKA"
gene  complement(72413..73297)
CDS   complement(72413..73297)
      /locus_tag="DMACINML_00817"
      /inference="ab initio prediction:Prodigal:2.6"
      /inference="similar to AA sequence:RefSeq:SQE25111.1"
      /codon_start=1
      /transl_table=11
      /product="hypothetical protein"
      /protein_id="Prokka:DMACINML_00817"
      /translation="MDKLTINDFNVSLPSSQNITNRKEILELKKEEQEKVKVNDISDN
QISGFKVVFENKQGELMALKISDENYKNLQSHFGSFTNYIARDDGTIRLNGEANEFIA
NWFEKISSEFFNPNSLNKEESNHINVKFHKNTLFESMQNLAFKGEDELSLSANLQTR
LNFAIEKDVNFDGNINEFDVKESLTDILRDIKNASGGSadATKITDPQKSDENDEVK
IKKKKDEKDVKDLLEIAKEKGLSALSADQAKLKASNPQIFEELQNKSLGNLEQNLKK
DLMVQIGNNEAIFVDKRV"
gene  complement(73337..73537)
CDS   complement(73337..73537)
      /locus_tag="DMACINML_00818"
      /inference="ab initio prediction:Prodigal:2.6"
      /inference="similar to AA sequence:RefSeq:CKH06754.1"
      /codon_start=1
      /transl_table=11
      /product="periplasmic protein"
      /protein_id="Prokka:DMACINML_00818"
      /translation="MRKLLFIALVACFVNSFAYGKTENNNKNSQVRNSCVDYEIRLKQ
CNSLPTQHKRQACRLGLFAACK"
sig_peptide complement(73481..73537)
           /locus_tag="DMACINML_00818"
           /inference="ab initio prediction:SignalP:4.1"
           /note="predicted cleavage at residue 19"

```

gene 73670..74653  
/locus\_tag="DMACINML\_00819"

CDS 73670..74653  
/locus\_tag="DMACINML\_00819"  
/inference="ab initio prediction:Prodigal:2.6"  
/inference="similar to AA sequence:RefSeq:ABS44159.1"  
/codon\_start=1  
/transl\_table=11  
/product="thiamine biosynthesis protein:ExsB"  
/protein\_id="Prokka:DMACINML\_00819"  
/translation="MKALALFSGGLDSMLAMKLITSQGIEVKALNINIGFGSTSDKSE  
IMKKRAAMVGADFEMIDVRNSYLQKVL FNPQYGYGKHFNPCIDCHAFMFKTALSMLKE  
ENASFIITGEVLGQRPM SQRGDAMAKVKKLALDEEDLILRPMC AKNLPLTKPEREGWV  
DREKLEGISGRSRKRQLELA AKFGLED FESPGGGCLLTLDSFAKKIRDFIEFDKDMQV  
NDAQLLKYGRHLRLPNGAKMIIGRNELE NELLRNLKTPKYEVIELGDLIGAYSLLSAN  
ADEKDLELALKIALTYTKHEANKSYELRFKNQNYKSIAFEDKKEINPFFIS"

gene complement(74656..76308)  
/gene="fhaC"

CDS complement(74656..76308)  
/gene="fhaC"  
/locus\_tag="DMACINML\_00820"  
/inference="ab initio prediction:Prodigal:2.6"  
/inference="similar to AA sequence:UniProtKB:P35077"  
/codon\_start=1  
/transl\_table=11  
/product="Filamentous hemagglutinin transporter protein  
FhaC"  
/protein\_id="Prokka:DMACINML\_00820"  
/translation="MRFLKIIIFLLMSFICLSQADDSAKTLNLLDKRQQQLHIQKEFDE  
LEKKQQQEKDVYLENQDSEDKIYIFKQIQFKKNDLTMQTNNILKKYINQPLSVSDIY  
NMIKELTNFIVSKGYSTSSVTIDGINQERDILFLDLKYGFVGEVYLN GDNNTTRLDFG  
MPLKKGDKFN IYDLDTGIENLNNGARDVKI AVKASENYGYSDFINLQSKPPDLILDF  
DNSGYKAKGEYKASAYLSLSNIFNLNDSIRFGFIKGLLKDMSQERENVVYANYTLPIQ  
SYQLSYSMQYSDNINMIEGYDNSFIKNTDTSLRHKIMLKKILHRTSKDKFSIYANLGI  
KDDVNEIDNFRLESSGRYSSIASGVEYSTLAFGGFLFLNLEYEKGIPFLGSKKDSKD  
SLYKIEFNKVNFNLSYQKSFYANDGLAFLYQNSSGASYSNESLLYADKFLIGDEYTVR  
GFKESSAALDYGAYSNN TIYLQFLNAPKYLRAL EPFVGLDMGYGRDYLLPNKDFLAGV  
AFGFRYLNHL SLNL TASKALHKSSNMPSETIPIYLRASVFF"

sig\_peptide complement(76249..76308)  
/gene="fhaC"  
/locus\_tag="DMACINML\_00820"  
/inference="ab initio prediction:SignalP:4.1"  
/note="predicted cleavage at residue 20"

gene complement(76309..81933)  
/gene="fhaB"

CDS complement(76309..81933)  
/gene="fhaB"  
/locus\_tag="DMACINML\_00821"  
/inference="ab initio prediction:Prodigal:2.6"  
/inference="similar to AA sequence:UniProtKB:P12255"  
/codon\_start=1  
/transl\_table=11



/product="Filamentous hemagglutinin"  
/protein\_id="Prokka:DMACINML\_00821"  
/translation="MEFNKKKIVRLSLNLTLLGALFPCVLF SADLRQRNGNVIVSRTA  
DLTQSSNKTDVINIKNPNQNGVSHNQFDEF SVQDGVIFNNSLKDGNSQIGGWVGNPN  
LKQNANTIINEISSKQASSINGAVEVFGKSANLIFANENGFSVNGAFLNTKGVTLST  
GKFNGDFTEVTSNGRVAIGEKGVMVDGDYFNVISRGRIDLAGSIAHYQSGKNLSDINFI  
AGLNKVDLSTPNAPKIVASKQKDEKIDYGDIDGKYLGS MYANTVTLISTEEGVGVRHSG  
VIRGIEDVIVKVKDKAEFQAIGVNSNGSVKIDAKDIKTSLINADNIDLKASGKVTNEG  
LYKGKQIQINANNFENAKQVNF SQETKIDIFDINEENSKIYADNLALNTLDKTSNFGFI  
NALNDIKVDTNSFDNQGEISANKDISLTLNDDAFVNNGKILSQKDIQIQANKDLTLNH  
GNLYAQNL LHIKSLNDLNINSKLENASSIDLDAKNIYVKNL VASGKELNLHADENLVN  
DAYLFSNGDFRAQATTLTNNSTFNSLNNLYLNAHTIHNALIFADKDLNIEANILNNN  
ANLTGNLEILTEYAQFGQVGYGDTAFKRWNMEVGVTGIVKYNNLLDSKQASIQAGKD  
ININTQSQDNARQINNSGKILAQGNIVSFGNIDNKSLSKEISVREVL EQIRVNGFFAE  
EYLGSWNTNSTYYFVDRESLLDALKYFSTTQAKDHQRESAWNALKDAAAKNSALNQYF  
SLLFGSDYASKRFVPDQKEWNLDAKIVFKAKSEAAIASNGKLDLNAKEYNQDLVSSLD  
KNFALVSDLK KATNSQDLILNSIPDLINSGLFTLENKTNNNITYEYTTNTSII DESE  
YFGFLNILNQFKNKNFDEFIVIGDPFFENQLINAMYANALQSNTKLEEEIKKLENG  
AKYANENGLNLGQGLAKNQAVDQDMILYVTIKQKGNIMAPMLYLSKETIANNEIKSN  
LTGKTGIDINTQSFNLSLGGITSEGQININAGNEINLQSSNLNAQNINLSANNVNIDT  
VLGIDEKGSYNSIQKGEIKANNVVNIDSVNDLNKNSDIST SANDSKIVLISQKGDVN  
IKNDYSKSSSEFQINTDSQKSNTTTSIDGVLSTNIKGANVGVSNQDVNIIASINAD  
SKIDINANNVNIKDAHEL SKTKTDGVYLPVEISYESANLETSKISSTLNSKGDINI  
NTNGNIAITGSTLQADKSANLNGENITIEGENKISSSSHSSTSSIAGYKQSSVNTDA  
SLVSSSQIQTDNLNLNAQKNVSIKGS ELNGGEIDIQADKVDFIAAQNKIHTESDSLAF  
GVFANANLELTGNGVAVNYSFVQDKANANTTSSNSITQGGVRSDDLGTAEVGLFESK  
TEKISDELSYVSNTIKGSNININANNALDIGGANFEASKDINLRAGEIASTKYEDTKT  
QSTTGFLYIKERIEATSPIASAINQSAQNAAKNENLGVNYGIVASQALANTANIFS  
NNLINTTSNQT LGFKFNQDKSQSSSENISKINAGGNLNL ESTKGSIVLNGVEAKANSI  
NIEAKDNVILNAAKSKNSSSSSSLEIAATNKQTAGYHAVDGGTVGEGIEGFVSASHSK  
TNETKFTNTNLNANNVNINTGKDFALNGANVKASNDAILNVGGNLEVNSLADSLNSQK  
YSALLNVSGTGGLSSNHLVTG SVAGTLGIGYAKTDKTSVTTQSGISAANEINGHVNGN  
LNLQGGILNSDSQKGNLLVDGKVTNSKVSVEKSDGATIRLSGGTNQSFGGVVDIDDH  
IDKTGGVNSAVNININNNKNHGI STDTQNTTDTQDHSWAGGTINLSSISKIKNGISK  
VTGSNSTSNQPSNQPSKSDGPYIN ESTQTTRL"

gene complement(82188..83276)

/gene="aroC"

CDS complement(82188..83276)

/gene="aroC"

/locus\_tag="DMACINML\_00822"

/EC\_number="4.2.3.5"

/inference="ab initio prediction:Prodigal:2.6"

/inference="similar to AA sequence:RefSeq:CAL35731.1"

/codon\_start=1

/transl\_table=11

/product="chorismate synthase"

/protein\_id="Prokka:DMACINML\_00822"

/translation="MNTFGTRLKFTSFGESHGAAVGCVIDGMPAGVKFDEDFLQSELD  
KRGKGSKFATPRKEGDKVQLSGVFE GYTTGHPIAMVVFNENAHSKDYDNLKDLFRPA  
HADFTYFHKYGIRDHRGGGRASARES VARVAAGAVAAMLLREFDICVQSGVFGVGRFV  
SNLKEEELDFEFAKQSEIFCLDPNLEDEFKNEILGARN SKDSV GASVYTRAKGMLVGL  
GEVLYDKLDSKLAHALMGINAVKAVEIGEGINASKMRGSQNN DALKGGEFLSNHSGGI  
LGGISNGQDLILKTYFKPTPSIFLKQSSMDKFGNDLEFELKGRHDPVGVGRSVVVA

gene MVRLVLADCLLLHASANLNNLKNAYGVK"  
 complement(83276..83950)  
 /gene="rnc"  
 /locus\_tag="DMACINML\_00823"  
 CDS complement(83276..83950)  
 /gene="rnc"  
 /locus\_tag="DMACINML\_00823"  
 /EC\_number="3.1.26.3"  
 /inference="ab initio prediction:Prodigal:2.6"  
 /inference="similar to AA sequence:RefSeq:EAQ72743.2"  
 /codon\_start=1  
 /transl\_table=11  
 /product="ribonuclease III"  
 /protein\_id="Prokka:DMACINML\_00823"  
 /translation="MKNIELLEQKLAYNFKDKDLLIHALTHKSFKKPYNNERLEFLGD  
 AVLDLVVGEYLFHKFAKDAEGDLSKLRALVNEKSFAKIANSNLGDFIFMSAAEENN  
 GGKEKPSILSDALEAIIIGAIHLEAGFDFAKNIALKLIENFPQIDAKILIKDYKTKLQ  
 EITQAKLGQTPQYETVRAFQPDHLKQFEIALILNGQELARAIAGNKKEAQQMAAKITL  
 EKL GAL"  
 gene complement(83937..84377)  
 /gene="rnhA"  
 /locus\_tag="DMACINML\_00824"  
 CDS complement(83937..84377)  
 /gene="rnhA"  
 /locus\_tag="DMACINML\_00824"  
 /EC\_number="3.1.26.-"  
 /inference="ab initio prediction:Prodigal:2.6"  
 /inference="similar to AA sequence:RefSeq:CAL35733.1"  
 /codon\_start=1  
 /transl\_table=11  
 /product="ribonuclease HI"  
 /protein\_id="Prokka:DMACINML\_00824"  
 /translation="MRHIEIYTDGSLKPNPGFGWAYILRYNQHQKEGFGAEANTTNN  
 RMELKAIIEALKALKEPCEISLFTDSNLMVQSINEWLEAWIKKDFKGGKNVDLWKEYI  
 NMAKPHKIKAYWVKAHNGHLENERCDTLAREAALKIARENDEKY"  
 gene complement(84364..85347)  
 /locus\_tag="DMACINML\_00825"  
 CDS complement(84364..85347)  
 /locus\_tag="DMACINML\_00825"  
 /inference="ab initio prediction:Prodigal:2.6"  
 /inference="similar to AA sequence:RefSeq:CAL35734.1"  
 /codon\_start=1  
 /transl\_table=11  
 /product="putative periplasmic protein"  
 /protein\_id="Prokka:DMACINML\_00825"  
 /translation="MDFFFVEYRDPLVGLIILTVLIFVAVANYIWKVFASKDEEQKL  
 EKFIKKFEMDNIHKDLLRNEGLSFGNLSFLAEIFTKSGFEKATQIYLI ALEKSKDKQ  
 EREFIFFALAKVYFKAGFLERAKEVLLQALKIRPRNIQTLLKLLKIVYLLKRKHENLE  
 LLGCLFELGENVKEEKEFLKALDFLASSLSDEEKKEHILKLQIDNNSMLGRLVFEKYH  
 IFLNQDFSSICDILLYKENKAFNLQNKEYFEFFYALGLIEDEKPKDIVFKNSFKMLKI  
 LKDNSFKARLEFSYRCTECKSVMPLFFYHCPVCYEFNTCQIIYEVKNNETY"  
 gene 85418..87244  
 /gene="dnaG"  
 /locus\_tag="DMACINML\_00826"

CDS 85418..87244  
 /gene="dnaG"  
 /locus\_tag="DMACINML\_00826"  
 /EC\_number="2.7.7.-"  
 /inference="ab initio prediction:Prodigal:2.6"  
 /inference="similar to AA sequence:RefSeq:EAQ72538.2"  
 /codon\_start=1  
 /transl\_table=11  
 /product="DNA primase"  
 /protein\_id="Prokka:DMACINML\_00826"  
 /translation="MITKESIENLSQRLNIVDIIENYIEVKKQGSSFVCVCPFHADKN  
 PSMHINPTKGFYHCFACKAGGDAFKFVMDYKLSFADAVEKVANLCNFTLSYTKKENE  
 NKKELRTILPSLNAYFKSNLKHHEALDYLYKRMLNDQDIKAFELGFAGSSEDSIRLF  
 HNEKIPLDAMSVGALKKDENEFFYASFIWRITFPFIYDHKDLLVGGFGRRTLNPVAAK  
 YVNSPQNILFDKSRIFYAFNIAKENIAKKKEMIVCEGYMDAIAFHKAGFNNNAVAVLGT  
 ALTENHLPLIRRYEAKVILCFDND EAGLNAATRS AFLLSTHKIDGKVALLEGKDPAE  
 LVANNQSAKLHTLLEKGM DLGEFYIRRI LSSFSLSALDKQKAL ENIQYTF SLEPLV  
 ASSYVSLVSKLLGVDEKLIVLSSNQKSNKTIDFNASFQQTQNHNPKSHITELELLNYL  
 KNNPNTHELFIKIGDIRCFKHRV LLEKILEHKSYESD SIREFESKNFSKDL SQIEFLW  
 GICKVNLAFLNHINITTPYLALKKQIFTLIEKNFTLLSKNLNDYELIGFLKENLFLK  
 NEKDEEKLEALFKNLHRFFSAKNLDIKILKNNSEIDYNEEPF"

gene 87342..87611  
 /locus\_tag="DMACINML\_00827"

CDS 87342..87611  
 /locus\_tag="DMACINML\_00827"  
 /inference="ab initio prediction:Prodigal:2.6"  
 /inference="similar to AA sequence:RefSeq:CAL35736.1"  
 /codon\_start=1  
 /transl\_table=11  
 /product="NifU protein"  
 /protein\_id="Prokka:DMACINML\_00827"  
 /translation="MPFSDEELINPVKASLDKSMPLERDGGGLEFLGIKNGVVVYVHL  
 IGACKGCASSGTTLKYGLERQLKIDIHPEITIVNLNGGAEDFAKL"

gene 87598..88155  
 /locus\_tag="DMACINML\_00828"

CDS 87598..88155  
 /locus\_tag="DMACINML\_00828"  
 /inference="ab initio prediction:Prodigal:2.6"  
 /inference="similar to AA sequence:RefSeq:APA51474.1"  
 /codon\_start=1  
 /transl\_table=11  
 /product="histidine kinase"  
 /protein\_id="Prokka:DMACINML\_00828"  
 /translation="MQNYKKLGIEHFLRKDFKTAKIYFSLAYEKRKNKRLFHFITLCD  
 LALKSPKEAFLLFEFYLEHYQIKNIDKDLEEILHTVELKNEKNADEAENEIQEAHALN  
 YKDFLKSEEQIGFKKSFENIIHSTKLVIDNRDDFLDFLEKLLDNGYKDITLNYIESVM  
 PHFWANERFIKLQEKLIGFKSEIKA"

gene 88139..89422  
 /gene="murE"

CDS 88139..89422  
 /gene="murE"  
 /locus\_tag="DMACINML\_00829"  
 /EC\_number="6.3.2.13"

```

/inference="ab initio prediction:Prodigal:2.6"
/inference="similar to AA sequence:RefSeq:CAL35738.1"
/codon_start=1
/transl_table=11
/product="UDP-N-acetylmuramoylalanyl-D-glutamate--2,
6-diaminopimelate ligase"
/protein_id="Prokka:DMACINML_00829"
/translation="MKLKLDSHFITDNTLECEKDCFFLKTAQNMNFSKALEKGAKII
DVEECKLLKIDENIKIIGITGTNGKTTTAAAIYSILLDLGFKCGLCGTRGAFINDEQ
IDEKSLTTSPIKLTLEYLQLATQKKCDFFIMEVSSHALVQNRIEGLNFAAKIFTNITQ
DHLDFHGNFENYKAAKELFFTDESLKFINKDALMIKFNVRNAFTYGIENPSLYQVKAY
SLEDGINAIVALKDQSFHIDSPLLGLFNLYNLLAASACVNELVKPDLKDLEKAISGFG
GVCGRVEQVANGVIVDFAHTPDGIEKVLDTLKNKKLIVVFGAGGDRDKTKRPLMGKIV
EHFAKIAIITSDNPRSEEPKDIMNEILSGFQNPDKALMIEDRKEAINKALKLKEKDDL
VVILGKG DENTQEIKGVKYPFSDKAIVNEILKNQG"
gene 89426..89731
/locus_tag="DMACINML_00830"
CDS 89426..89731
/locus_tag="DMACINML_00830"
/inference="ab initio prediction:Prodigal:2.6"
/inference="similar to AA sequence:RefSeq:CAL35739.1"
/note="conserved hypothetical protein Cj1642"
/codon_start=1
/transl_table=11
/product="hypothetical protein"
/protein_id="Prokka:DMACINML_00830"
/translation="MFENMDFSKMGELLNQVQEKAKNIELELANREFSAKSGAGLVKV
SANGKGEIIDVSIDDSLLEDKESLQILLISAINDVLAMVAQNRTSLASDVLGGFGKL"
gene 89728..90819
/locus_tag="DMACINML_00831"
CDS 89728..90819
/locus_tag="DMACINML_00831"
/inference="ab initio prediction:Prodigal:2.6"
/inference="similar to AA sequence:RefSeq:CAL35740.1"
/codon_start=1
/transl_table=11
/product="putative periplasmic protein"
/protein_id="Prokka:DMACINML_00831"
/translation="MKFLFFLVAFVLVLSAIERPKFEDFAAGYERNKASMLNYESGMPA
FALSENLLAVLKQPNAKLNKYVKYDPFLNLYLVRTDFSLIPTPMGDEEKLTRNDWIGI
WDPNRAYIGHIKYLAQNIDEKDQLDFSTKVGLLGTPCCEMMGIALNNSFFIGNRYLKH
FMKYNDVYWGDIGVDFAVRENKIYVNNVRKSGQFLINDEIISVDGTPFKDIRKLNKI
LFADRGSTLYFQVLRDNVDLNI STEVFADLSKFNLP SNKPKPKPTSFRSNIIGLSVNS
SLVVTRVDAGSKAALAGFMVGDKILRANNVILKDFKELQTL LGTGNDFNILIERKSDK
LPLSGLNNDLGGVHSGGDGKFQFFIRLVK"
gene 90816..91655
/gene="ispA"
/locus_tag="DMACINML_00832"
CDS 90816..91655
/gene="ispA"
/locus_tag="DMACINML_00832"
/EC_number="2.5.1.10"
/inference="ab initio prediction:Prodigal:2.6"
/inference="similar to AA sequence:RefSeq:CAL35741.1"

```

```

/codon_start=1
/transl_table=11
/product="geranyltranstransferase"
/protein_id="Prokka:DMACINML_00832"
/translation="MKELFIKHLENHLPKVQSFHPFFNEALAVMLRAGGKHFRAQLLL
GIVEAKMPSLIPNALNAALALEFIHTYSLIHDDLPAAMDNADFRRGTPTLHKTYDETTA
ILVGDALNTEAFLLLSNLNLKESIKINLIRTLAFNAGLNGMILGQAIDCYFEDKKLNL
EELEFLHIHKARLIAAALKMGCEICELDEKESEKIYQIGLKLGLIFQINDDIIDATM
SEESGKPTKHDEHKNSFVNLGLKNAIQSKEDLINECKNDLNDLDANLAKMIKSLMI
KYL"
gene 91665..93563
      /gene="tkt"
      /locus_tag="DMACINML_00833"
CDS 91665..93563
     /gene="tkt"
     /locus_tag="DMACINML_00833"
     /EC_number="2.2.1.1"
     /inference="ab initio prediction:Prodigal:2.6"
     /inference="similar to AA sequence:RefSeq:CAL35742.1"
     /codon_start=1
     /transl_table=11
     /product="transketolase"
     /protein_id="Prokka:DMACINML_00833"
     /translation="MDLSILQEANTLRFLSADMVQKANSQHPGAPLGMADILTALSY
HLSHNPKNPTWLNDRDLIFSGGHASALLYSLHLSGYDLSLEDLKNFRQLHSKTPGHP
EISTQGVIEIATGPLGQGIANAVGFAMAAKAQNLLGKELINHKVYCLCGDGLQEGIS
YEACSLAGLHKLDNLIIDYSNEISIEGDVSLAFNEDVKMRFESQGFVLSINGHDYE
EIDKALKQAKEANKPCLIIAKTTIAKGAGELEGSHKSHGAPLGEVVIKKAKEKAGFDP
NLSFHIPKAAKIRFESAVELGDLEEAKWKDKLEKSEKELLEKLLNPDFTKINYPDFK
GKDLATRDSNGEILNALAKDLEGLGGSADLAPSNKTELYGMGDFVEGKNIHFIREH
AMAAINNAFARYGIFLPFSATFFIFSEYLKPAARIAALMKIKHFFIFTHDSIGVGEDG
PTHQPIEQLSTFRAMPNFLTFRPADGVENVKAWQIALNADIPSAFVLSRQKLKALNEP
VFGDVKNAYLLKESKDAKFTLLASGSEVSLCLESANELEKQGFACNVISMPCFELFE
KQDKAYKDRLLQGEVIGVEAAHSNELYKFCDRVYGIESFGESGKDKDVKHFGFSTPQ
ILNFILDK"
gene 93566..94681
      /gene="iamB"
      /locus_tag="DMACINML_00834"
CDS 93566..94681
     /gene="iamB"
     /locus_tag="DMACINML_00834"
     /inference="ab initio prediction:Prodigal:2.6"
     /inference="similar to AA sequence:RefSeq:CAL35743.1"
     /codon_start=1
     /transl_table=11
     /product="putative ABC transport system permease"
     /protein_id="Prokka:DMACINML_00834"
     /translation="MEANFKFQKEENKVFIFGIWDKTSVSKIKIKDLLSQISQTNCIF
DFSQLEIDMAGVRRFFLALEHDLKKNLILRQGLNTRFKSLFELCEKNYQRIDEKQE
KKFNFTDFFISLGIISFDLLKILQKFISFTGAFFTSFLFCVKNPKNFRFISFLYHIEN
SAFKALPIVILTALLVGVVLAYQAAYQLAQFGANIFIVDLVGISATRELAPLIAAIVI
AGRSASSYTAQIGVMKITDEINAMNTMGFRSFEFIIIPRVMALVIAMPLIVALSDAIS
ILGGMVIAKINLDISFGFLRRRFREAVAMKHIIIGLVKAPIFGFLIGLIACFRGFVVK
NTTQSIGIYTTKSVVNAIFWVIAFDALFSVLTIMEV"

```

gene 94682..95404  
 /gene="iamA"  
 /locus\_tag="DMACINML\_00835"  
 CDS 94682..95404  
 /gene="iamA"  
 /locus\_tag="DMACINML\_00835"  
 /inference="ab initio prediction:Prodigal:2.6"  
 /inference="similar to AA sequence:RefSeq:CAL35744.1"  
 /codon\_start=1  
 /transl\_table=11  
 /product="putative ABC transport system ATP-binding protein"  
 /protein\_id="Prokka:DMACINML\_00835"  
 /translation="MIIKAQNIITRFGNKVVHDGVSFEINKNEIFGILGGSGSGKSVL  
 LKQMLMLEHFDEGEYEILGFKLKNISEEDALALRKKWGVVFQFSALFSFFSVYENIAI  
 PLKEYTNLDPIAIKELVLMKLMVGLNESVLKQLPSELSSGGMQKRVAIARALALDSKL  
 LFLDEPTSGLDPHSSREFDDLILELKQSFDLNIVLVTHDKESMKNLLERFIILEDKKV  
 AFCGNYEELKAQNERLFKRFME"  
 gene 95407..96300  
 /locus\_tag="DMACINML\_00836"  
 CDS 95407..96300  
 /locus\_tag="DMACINML\_00836"  
 /inference="ab initio prediction:Prodigal:2.6"  
 /inference="similar to AA sequence:RefSeq:CAL35745.1"  
 /codon\_start=1  
 /transl\_table=11  
 /product="putative ABC transport system periplasmic substrate-binding protein"  
 /protein\_id="Prokka:DMACINML\_00836"  
 /translation="MENKANYFFVGLFVFGVFFASIGFMLWLGGYSKEESFEYIEIHT  
 QESVAGLGIKAPVRLLGVEIGNVEDISIIYDKENLGVNLIKIKKGTPIKEDTFATLQL  
 QGITGLKFVQLQGGSKNSPKLQAKDKEEFPVIQFKESFFAAIDRQSEHIFSLIKRADD  
 KSKELFSDKNLKNLEILLNLAQLSATLNENSKTLNHNIANTSCLKGEMAENVLSAK  
 GFNASLKDIQEGALALSSFAKKANAKLDSYDDLRLSLDENLELLKKVLLLESNILLIQNL  
 QKSPSDLIFKETKPKLGPGEK"  
 gene 96300..96902  
 /locus\_tag="DMACINML\_00837"  
 CDS 96300..96902  
 /locus\_tag="DMACINML\_00837"  
 /inference="ab initio prediction:Prodigal:2.6"  
 /inference="similar to AA sequence:RefSeq:CAL35746.1"  
 /codon\_start=1  
 /transl\_table=11  
 /product="putative lipoprotein"  
 /protein\_id="Prokka:DMACINML\_00837"  
 /translation="MKKFILIAILALIFNACSIPTSTLDKTSFILKNDGIPLQANFI  
 KSDKILKIQNASLPLYLHSRSIIYIQKGVSGAYAYHYWADLPNNLYQSLLLKFEQSQ  
 IFKTLISQSSIGSDYILESRIDSFEQVINENENYISISISVNFIDAKESKIIAHRLF  
 SVKEELDKIDIFNVYQSFEKALNFIGNEIVLWINTTLDEK"  
 sig\_peptide 96300..96356  
 /locus\_tag="DMACINML\_00837"  
 /inference="ab initio prediction:SignalP:4.1"  
 /note="predicted cleavage at residue 19"  
 gene 96954..97454

CDS /locus\_tag="DMACINML\_00838"  
 96954..97454  
 /locus\_tag="DMACINML\_00838"  
 /inference="ab initio prediction:Prodigal:2.6"  
 /inference="similar to AA sequence:RefSeq:CAL35747.1"  
 /note="hypothetical protein Cj1650"  
 /codon\_start=1  
 /transl\_table=11  
 /product="hypothetical protein"  
 /protein\_id="Prokka:DMACINML\_00838"  
 /translation="MKNELDVFKKHLGEIQGVSEFKATQICSQINDANDFIGALQILD  
 LTLKKIEKSITERLDEQNDDLQKRTL DATSSQLIQNCSFMGTALFGNIFNVYVVGKLF  
 EFEISNPLLVLKAGYEGVLAYVQDKRDEIKDILCELSSAITMGIGMDNLNLSNSTTD  
 FKNLFR"

gene complement(97786..98544)  
 /gene="map"

CDS complement(97786..98544)  
 /gene="map"  
 /locus\_tag="DMACINML\_00839"  
 /EC\_number="3.4.11.18"  
 /inference="ab initio prediction:Prodigal:2.6"  
 /inference="similar to AA sequence:RefSeq:CAL35748.1"  
 /codon\_start=1  
 /transl\_table=11  
 /product="methionine aminopeptidase"  
 /protein\_id="Prokka:DMACINML\_00839"  
 /translation="MIELKKPAEIEKLRIANQIVAKTLDFFLENEIKAGMSLKQIDKMA  
 EDFILSLGAKPSFKGLYGFPGAICTSLNQVCIHGIPDEKIIKEGDILGLDVGSLIDGY  
 YGDAARTIAIGKISSTDEALISCAKDALYHAIDIIREGMRFKELSAALGEFIDSRGFV  
 PLRGYCGHGIGRKPHEPEILNYLEKGANAKSGPKIKNGMVFCIEPMICQKDGTPKHF  
 NGKWDAGSVDELNSAHYEHCVAIINGRAEILSTL"

gene complement(98554..99297)  
 /gene="murI"

CDS complement(98554..99297)  
 /gene="murI"  
 /locus\_tag="DMACINML\_00840"  
 /EC\_number="5.1.1.3"  
 /inference="ab initio prediction:Prodigal:2.6"  
 /inference="similar to AA sequence:RefSeq:CAL35749.1"  
 /codon\_start=1  
 /transl\_table=11  
 /product="glutamate racemase"  
 /protein\_id="Prokka:DMACINML\_00840"  
 /translation="MKIGVFD SGVGLSVLKSLEYEARLFDEIIYYGDTARVPYGVKDK  
 DTIVKFCLEALDFFSKFNIDMLIIACNTASAYALDALRSRADFPPIYGVIDAGVEATKK  
 ALLDKNKKILVIATKATIHSKEYQNRLQE QGFTNVDALATGLFVPMVEEGIFEGEFLQ  
 SAMRHYFKGIETPNALILACTHFPLLANSL SAYFGSKTKLIHSGDAIVEFLKQRQKLL  
 LKEKKAKLHFYASSDVKSLENTAKIWLNL"

gene complement(99299..99760)  
 /gene="nlpC"

CDS complement(99299..99760)  
 /locus\_tag="DMACINML\_00841"

```

/ gene="nlpC"
/ locus_tag="DMACINML_00841"
/ inference="ab initio prediction:Prodigal:2.6"
/ inference="similar to AA sequence:RefSeq:EAQ72731.1"
/ codon_start=1
/ transl_table=11
/ product="lipoprotein NlpC"
/ protein_id="Prokka:DMACINML_00841"
/ translation="MRFIFVIMVAFICIGCSLSQNTSHTKINYNVDKETRLRAIANE
WKKTPYVLGGSTKRGADCSGFAQSTLAQFNTHIPRTTTKQLRSGIKVSKSLKKTGDLV
FFKTGRGPNGMHVGIYMSKGFIFHLSTKGGVREVDLNSSYWKNNRYIGARRY"
sig_peptide complement(99692..99760)
/ gene="nlpC"
/ locus_tag="DMACINML_00841"
/ inference="ab initio prediction:SignalP:4.1"
/ note="predicted cleavage at residue 23"
gene complement(99769..100938)
/ gene="nhaA2"
CDS / locus_tag="DMACINML_00842"
complement(99769..100938)
/ gene="nhaA2"
/ locus_tag="DMACINML_00842"
/ inference="ab initio prediction:Prodigal:2.6"
/ inference="similar to AA sequence:RefSeq:CAL35751.1"
/ codon_start=1
/ transl_table=11
/ product="Na(+)/H(+) antiporter"
/ protein_id="Prokka:DMACINML_00842"
/ translation="MNKVLKLLKALVLEAFGGFLLIICTILALLVQNGSLSEHYREL
LNLKVGVSVEFELNKPFLWINDGLISIFFFAIGLELKKFLHGDFKNPKNIVLPPFM
GALGGILIPALIFAIVNIIGDAYTLKGWAIPTATDTAFALAILMCGKHIPSSKLFLL
SLAIFDDVGAILIIAIFYTTKLSIFAFIVAGIAIFMMLILNILGITRKSFYFICSIIL
WVSVLKSGVHATLAGIITAFFIPMQTKNGEDFLEGIYESLKFVIAFVILPLFAFANAG
VNLSNIDLNAIFSGVSIIGIFLGLFIGKQLGVFLFSYFAIKFKLASLPQANLKLQYGV
CILTIGFTMSLFIDGLAYEVSDIFNYADNLAILIASFCSGIWFYIYKFFTARS"
gene complement(100935..102083)
/ gene="nhaA1"
CDS / locus_tag="DMACINML_00843"
complement(100935..102083)
/ gene="nhaA1"
/ locus_tag="DMACINML_00843"
/ inference="ab initio prediction:Prodigal:2.6"
/ inference="similar to AA sequence:RefSeq:CAL35752.1"
/ codon_start=1
/ transl_table=11
/ product="Na(+)/H(+) antiporter"
/ protein_id="Prokka:DMACINML_00843"
/ translation="MQAVKKIILSETFPGILLIFFTLLALLFKNSSLSVIYTDFFHAN
FTIGFDHFQIAKSLDLWINDGLIAIFFLCIGLELKYEILRGQLKNIRSVSLPIFGALG
GMIVPALIFSAINYSHEFAMKGWAIPTATDIAFAVGILMMLGSKIPSSKLFLLSLAI
FDDLGAIIIIALFYTDQLSTLAIIVCLLCVFILFVLNYFHVTHLPLYVLVGVLLWIAM
LKSGVHATLAGVIAALFIPLDTKNKKPYLHEVHKDLNPWVVYFVILPLFAFANAGIDL
DMHFESIVSPVSMGIMLGLFLGKQLGVFGFCYLAIKLKLAKLPENIKYKFFYGCIL
TIGFTMSLFIDGLAYKNSNIFEHADKLAILIASFLSAIVGFYIYKIVK"

```



gene complement(102207..102389)  
 /locus\_tag="DMACINML\_00844"  
 CDS complement(102207..102389)  
 /locus\_tag="DMACINML\_00844"  
 /inference="ab initio prediction:Prodigal:2.6"  
 /inference="similar to AA sequence:RefSeq:CAL35753.1"  
 /note="hypothetical protein Cj1656c"  
 /codon\_start=1  
 /transl\_table=11  
 /product="hypothetical protein"  
 /protein\_id="Prokka:DMACINML\_00844"  
 /translation="MISDATMSNANLLTAVNTSVLKKSMdTNEVLMNELIKGMESASG  
 ASAPQASSSSGLDIYA"  
 gene 102562..104634  
 /locus\_tag="DMACINML\_00845"  
 CDS 102562..104634  
 /locus\_tag="DMACINML\_00845"  
 /inference="ab initio prediction:Prodigal:2.6"  
 /inference="similar to AA sequence:RefSeq:CAL35754.1"  
 /codon\_start=1  
 /transl\_table=11  
 /product="putative iron permease"  
 /protein\_id="Prokka:DMACINML\_00845"  
 /translation="MKFFKILFVLSMLFLANSAFARVDDYIAEANTIKNILEESIKSY  
 KKGDNLNAKKLESDAYFQHFENMEGSIGRNIGKKAITMERKFTNLRRLYKDKAPIEQI  
 DALIESLYYDLDEVAPILQNGYRLKAEASDTNYDKAAAEEKSSMQANAKREAEAEALIA  
 QMMGIDKNDLAKTNPSSFDTQNETIDDSVSSDLQAAAAMDARLQFILDNISTKFSQAA  
 NAFKNKDYQASKDFLNDALFNDYRNTKVEVLINKFTKAGNDQKIQQAIRTLIRQINNT  
 NIDEKNLRNDLDSIEEQLFDIFLQIPNSELSNLKIEGFNDETKGKDYTKVSDDIKLAL  
 DEILKNYEGFSASIVDDLQAIYLDIFEASGMENKIGAVDSALKLKIESLFSKSVALIK  
 ASADKKELEATFNDLEQLIASSVDKIQDSSPYSLFIWALGIILREGLEALIIVVAIVS  
 YLVQSGNKNRLNIAYSALFTGIILSFITAFGLSWLFKENAGQSRELIEGITMLIAVFL  
 LFYVGFWLLSNAQNKKWVSFIKQGAIDAISNNSAKTLWFTVFLAVYREGAETVLFYQA  
 LFFDAKTSTDLSAIFGGLGLGILVLIVLYFLLKAGAIRIPIKQFFYICSYIIFYMIFV  
 FTGKGIAELIEGKLIVPSLISMNFEPILWLGIYPYETLIPQFIVLILLIIGILLTKQ  
 ISKKGVKS"  
 sig\_peptide 102562..102627  
 /locus\_tag="DMACINML\_00845"  
 /inference="ab initio prediction:SignalP:4.1"  
 /note="predicted cleavage at residue 22"  
 gene 104631..105170  
 /gene="p19"  
 /locus\_tag="DMACINML\_00846"  
 CDS 104631..105170  
 /gene="p19"  
 /locus\_tag="DMACINML\_00846"  
 /inference="ab initio prediction:Prodigal:2.6"  
 /inference="similar to AA sequence:RefSeq:CAL35755.1"  
 /codon\_start=1  
 /transl\_table=11  
 /product="periplasmic protein p19"  
 /protein\_id="Prokka:DMACINML\_00846"  
 /translation="MIKKFLSVAAAAAISTNLFAGEVPIGDPKELNGMEIAAVYLQP  
 IEMEPRGIDLAASLADIHLEADIHALKNNPNNGFPEGFWMPYLTIAVELKNTDTGAIKR

GTLMPMVADDGPHYGANIAMEKDKKGGFGVGNyelTFYISNPEKQGFGRHVDEETGVG  
 KWFEPFKVDYKFKYTGTPK"

sig\_peptide 104631..104696  
 /gene="p19"  
 /locus\_tag="DMACINML\_00846"  
 /inference="ab initio prediction:SignalP:4.1"  
 /note="predicted cleavage at residue 22"

gene 105252..106655  
 /locus\_tag="DMACINML\_00847"

CDS 105252..106655  
 /locus\_tag="DMACINML\_00847"  
 /inference="ab initio prediction:Prodigal:2.6"  
 /inference="similar to AA sequence:RefSeq:CAL35756.1"  
 /codon\_start=1  
 /transl\_table=11  
 /product="putative integral membrane protein"  
 /protein\_id="Prokka:DMACINML\_00847"  
 /translation="MSIYFVHFLSSILPLSILMAFITPNKKYIFKSFLAVFLGFLFGY  
 FAFFIAAQFLKTENLIFNFIACLLLSFVLYFWQKIEILSFILLGILSFICIALHY  
 YNLTQDFPIFNGVLIDSEAISSLGFIALLICILIFFFLKWQKNINKKASVFLFLIL  
 IFIEGDKVLNILLTLMRNSFIETHFLVSVFGKSNYFGVFGIYVYVFFIIFLAFSL  
 QIRKKNIVKKQILDIAVRKNEAKNTLINRYFSSVFISCILSFICIILYFFMVSSKPLSI  
 DEPTPELLPKNGKIFDVALLRDNKLHRFAYISEQGKVIKIRFFLINKREDRDRSPVAVFD  
 ACAICGDMGYIKKEGELICISCNVRIPLPSVGKTGGCNPILPKYDYDGEKITIDVKDV  
 VAGSNYFSQIKDIQVQDPVSKDKIINTQAPFSYSYKGYIYFSNEKNYEEFKKDPMKY  
 VEDTEALFLIQRNNAS"

gene 106645..107940  
 /locus\_tag="DMACINML\_00848"

CDS 106645..107940  
 /locus\_tag="DMACINML\_00848"  
 /inference="ab initio prediction:Prodigal:2.6"  
 /inference="similar to AA sequence:RefSeq:CAL35757.1"  
 /codon\_start=1  
 /transl\_table=11  
 /product="putative ABC transport system permease"  
 /protein\_id="Prokka:DMACINML\_00848"  
 /translation="MLVKMITHSIFRNKIQKFLAFLTCFLATLLLCTMLNITLSIGDE  
 VTKQLKSYGSNILVLPKGSSLSIEIGNELYEPLKNKNYLEEKNLYMLKDIYWRNNITA  
 FAPFLEGKVEIKSNDSSKALLYGTYFQKAIEIKDDDDFITGIKSLYPYLVKQGEWAK  
 DDSNEIMLGEDFAKNNDLKINDTIKLIKENKISKEVKVVGILLHANPKMSNKIAPLN  
 LAQELLEKKGLYASAEVRAFTIPESALSEKVRMGEEKLDQIEYDKWYCSAYVGSIAS  
 QISDGLPGADAKALNAISDAQSLVVKKIQSLMAITCIICLIVASIAISSLMSEIHRR  
 KKEIGLLKVLGANTFQIYLLFAGENLIIALVSAVFGFIFGIGLSELISLGFYFIDI  
 AFIALPLSLVFAGLIAILGCLLPKNIANLSPAGVLYGR"

gene 107930..109048  
 /locus\_tag="DMACINML\_00849"

CDS 107930..109048  
 /locus\_tag="DMACINML\_00849"  
 /inference="ab initio prediction:Prodigal:2.6"  
 /inference="similar to AA sequence:RefSeq:CAL35758.1"  
 /codon\_start=1  
 /transl\_table=11  
 /product="putative integral membrane protein"  
 /protein\_id="Prokka:DMACINML\_00849"

```

/translation="MVDKFFLNELFKSIAFSYQRLFIIIVLSVFIGALTCSAFLNIYFD
IDTKLSKELKAYGANVIIIEPKNDKELILNQDYEEAKKNL KARALTPFLYTFNLGSTS
GVLGTD FRALKITKPFIEVKEGSFSLSDFDENSAFLGINLSKQLGLKAGNELQIYNP
ENGKTTKLTIKGILLSNDELDSIVLAPLSVVQNLSDTFGIQYANAVVYGNFDEINTKT
KNISNESINAKPISSVSLSEGLVLDKIKALMFLIILVLIIVTTSVNTTSSIIIFSRK
KEIALRLALGAKKSEIFKLFACEYFIISL FASIIIGAFCGIFLANIFGYLIFNASIDFR
FKAVFMALIISLFFAFLA AFFPIKKALKINVCENLKGE"
gene      109048..109695
          /locus_tag="DMACINML_00850"
CDS       109048..109695
          /locus_tag="DMACINML_00850"
          /inference="ab initio prediction:Prodigal:2.6"
          /inference="similar to AA sequence:RefSeq:CAL35759.1"
          /codon_start=1
          /transl_table=11
          /product="putative ABC transport system ATP-binding
protein"
          /protein_id="Prokka:DMACINML_00850"
          /translation="MKELIQIKNLSKEFGKVKALDNINLNIYKGEWLAIMGPSGSGKS
TLLNLSLMDNPSSGKYILDNEDLEQINEEQKITLRREKIGLIFQQFHLIPYLSALEN
VMLSQYYHSSVDEEDAKAVLEKVGLSHRSLHLSQLSGGEQQRVCIARALINNPEILL
ADEPTGNLDEANEKIVLETLQKLNKNEGKTIVLITHNPELAKFADRTLILQHGVLK"
gene      109692..110180
          /locus_tag="DMACINML_00851"
CDS       109692..110180
          /locus_tag="DMACINML_00851"
          /inference="ab initio prediction:Prodigal:2.6"
          /inference="similar to AA sequence:RefSeq:CAL35760.1"
          /codon_start=1
          /transl_table=11
          /product="putative periplasmic thioredoxin"
          /protein_id="Prokka:DMACINML_00851"
          /translation="MKKVFLFFISLFLNACSFDTNQNQGKIGQIGAEISAKDTSGKA
VKLADDKSDIKVLVFFQNGCPSCLQELPSLDKFMQEHPNKISVYAINSVDKAEVVQVL
AEQLNFKNIKVLTDDLKITNDRYAVFSTPTTIILKDGIKERILGEKPWQTFESKLIS
LL"
sig_peptide 109692..109748
          /locus_tag="DMACINML_00851"
          /inference="ab initio prediction:SignalP:4.1"
          /note="predicted cleavage at residue 19"
gene      110141..110644
          /locus_tag="DMACINML_00852"
CDS       110141..110644
          /locus_tag="DMACINML_00852"
          /inference="ab initio prediction:Prodigal:2.6"
          /inference="similar to AA sequence:RefSeq:APA81931.1"
          /codon_start=1
          /transl_table=11
          /product="putative lipoprotein thioredoxin"
          /protein_id="Prokka:DMACINML_00852"
          /translation="MANFRIQTYL FALITALFFIACDSGENFKALNSDKIYNFSYNGF
EKSLKLDEQTQNFALVFFTKDCGVCKEQIPIQLDLAKNYDFNIFVVLGDAKDAKDAKA
WADEKGLSHLALFYERKAAKYLSGAVGEIYGVVLSFFFKESKMDEKFIGLTPYNVLEN
EIKKLLKI"

```

gene complement(110746..111792)  
/locus\_tag="DMACINML\_00853"

CDS complement(110746..111792)  
/locus\_tag="DMACINML\_00853"  
/inference="ab initio prediction:Prodigal:2.6"  
/inference="similar to AA sequence:RefSeq:EAQ71968.1"  
/codon\_start=1  
/transl\_table=11  
/product="GTP-binding protein, GTP1/Obg family"  
/protein\_id="Prokka:DMACINML\_00853"  
/translation="MFIDSVKITLASGDGGKGAVSFRREKHVPLGGPDGGDGGNGGDI  
IFVCDNNTHTLVNFKGKRELRAQNGAGGMGRNKNKGGKGENLELIVPEGTQVIDAQTNE  
VLLDLTKEGQRELFKGGKGGGLGNTHFKHATNQRPDYAQPGIKGESRLVRLELKLADI  
VGLVGFNPVGKSTLISVVSNAKPEIANYEFTTLTPKLGVLVDVEYNSFVMADIPGII  
GASGGKGLGLAFLKHIERTSFLFVLDPMREMLKEQFIVLRNELEKFSNELFGREFG  
IMISKSDSVNLGEDFAEQITQNIANLEEYLSIDNPQSFLIKVSSLEKTGLKELKFM  
LEEIKKLREKPEKR"

gene complement(111894..112148)  
/gene="rpmA"

CDS complement(111894..112148)  
/gene="rpmA"  
/locus\_tag="DMACINML\_00854"  
/inference="ab initio prediction:Prodigal:2.6"  
/inference="similar to AA sequence:RefSeq:AJA54214.1"  
/codon\_start=1  
/transl\_table=11  
/product="50S ribosomal protein L27"  
/protein\_id="Prokka:DMACINML\_00854"  
/translation="MAHKKQGQSTQNNRDSIGRRLGVKKFGGEFVRAGNIIIRQRTA  
THAGNNVGIGKDHTIFALIDGFVKFERKDKDRKKVSVYPA"

gene complement(112159..112467)  
/gene="rplU"

CDS complement(112159..112467)  
/gene="rplU"  
/locus\_tag="DMACINML\_00855"  
/inference="ab initio prediction:Prodigal:2.6"  
/inference="similar to AA sequence:RefSeq:CAL34265.1"  
/codon\_start=1  
/transl\_table=11  
/product="50S ribosomal protein L21"  
/protein\_id="Prokka:DMACINML\_00855"  
/translation="MYAIIKHSGKQYKVSVDLKLDFEASKANIEVSEVLAINDK  
ELKVGAPFVAGAKVVLEVINHGKDKKVVIIYKRRRKRDSKLRGFRFTRVVVKDIKA  
"

gene complement(112625..113611)  
/locus\_tag="DMACINML\_00856"

CDS complement(112625..113611)  
/locus\_tag="DMACINML\_00856"  
/inference="ab initio prediction:Prodigal:2.6"  
/inference="similar to AA sequence:RefSeq:CAL34264.1"  
/codon\_start=1  
/transl\_table=11

```

/product="putative periplasmic protein"
/protein_id="Prokka:DMACINML_00856"
/translation="MKKIFLFLTILSFMWAQDDVIIYDYVPLEDVNLSSLDPVQSLKT
LPHQRNKFQKVQNGGTGESKEEALNNALIDALSQFKGVSSVNLRQEIQSVDLNFSHL
GQISQKSKSILQNVSKGRIDTYKVDKIDQNGTLWQVEISAFKSLYQNDNPKLAILND
KNKEETYLRALYDAFSQDENFTLLEREHDFKDENKIIKSEDSSESSESYKLGVLGAD
YILEFEILDITQAKQSKISYQNNTKASINIAYKLIFYPTRELVFSKTFNTTFTLSGDS
KKEQKNWENIALFMQREMEKSLFFDTLEEDNKQEGKENTYKLGHGGVNLGF"
gene      complement(113611..114234)
          /locus_tag="DMACINML_00857"
CDS      complement(113611..114234)
          /locus_tag="DMACINML_00857"
          /inference="ab initio prediction:Prodigal:2.6"
          /inference="similar to AA sequence:RefSeq:CAL34262.1"
          /codon_start=1
          /transl_table=11
/product="putative lipoprotein"
/protein_id="Prokka:DMACINML_00857"
/translation="MKKNIFIIFSAFFAVFFAACGAPVYTDGYASQKKQGDALTLGLD
REDFEKTAEIMIDSMLNDPAFANIQPGQRKVIAIGKIINDTPQRIDTDKLSKITIAL
RKSGKFVLTAVAAGGARDEMSEAVRELRDNEFNQNTISSKGTLPVDFPFSISGKIRQ
DNVKLKNQDIQAEYFFYLSVTDLNSGLAYWEDERTIDKTGSSKSVTW"
sig_peptide complement(114169..114234)
           /locus_tag="DMACINML_00857"
           /inference="ab initio prediction:SignalP:4.1"
           /note="predicted cleavage at residue 22"
gene      complement(114266..115618)
          /locus_tag="DMACINML_00858"
CDS      complement(114266..115618)
          /locus_tag="DMACINML_00858"
          /inference="ab initio prediction:Prodigal:2.6"
          /inference="similar to AA sequence:RefSeq:CAL34260.1"
          /codon_start=1
          /transl_table=11
/product="putative lipoprotein"
/protein_id="Prokka:DMACINML_00858"
/translation="MRYKTIVFSILAMVFSACSTHQEQNVFYQQNLFSTCNKQFFQE
QQEKINQNKDVIFIGLNTGYIARDCKDFNLSNSIFDKVEDSYKYDVDLQSLSKKSTRT
LASTLINEGVNDYQGAWYERTMLNVYKGLNFMSLGDFVNARVEFNRALMRQEAKKEYF
ASEIKKAYQEASKEEKLQRNIDNNIKIVSKQYENLKFDFNAQKEYTNPYVTYISSIFF
FMDYDYKKAADLLKEVYVLNLEEIEKEFKIFDQYSSSLNPKKLLKYYIFIIYENGLSP
ALDEFSLTLPFIFDDYITTVSIALPILTKRNASYDYLNIANNHQNFTTSNTFFDFDQIV
ASEFKANLTPIIKSLISSTLKTSLNMAVAKNDESGILSLATNIFSIVTTRSRLRFWN
FLPKNIQIMMIENDGLVQIYDNKNQKIYSSEVDIDKNVLIVRSFASQFPTRVYKIEN
"
sig_peptide complement(115559..115618)
           /locus_tag="DMACINML_00858"
           /inference="ab initio prediction:SignalP:4.1"
           /note="predicted cleavage at residue 20"
gene      complement(115687..117393)
          /locus_tag="DMACINML_00859"
CDS      complement(115687..117393)
          /locus_tag="DMACINML_00859"
          /inference="ab initio prediction:Prodigal:2.6"

```

```

/inference="similar to AA sequence:RefSeq:AHY39361.1"
/codon_start=1
/transl_table=11
/product="anaerobic C4-dicarboxylate transporter"
/protein_id="Prokka:DMACINML_00859"
/translation="MDTIMIILQIIVLLGAIFIGIRLGGIAIGYAGGLGVVVLGLVLG
MKPGNIPWDVILIIAAAIAAISAMQQAGGLDYMVRVTEKILRSKPRFINYLAPACGWL
LTILAGTGNVAVFSLMPVVVDVAKSQNIKPSAPLSLMVSSQIGITASPVSAVVYMSG
VLEPFGWSPALIGIWIWIGTTFIACMITAFIVSLITPMDLSKDPVYQERLKAGLVKDAG
AILHSEDKPGAKLSVAIFLITVLAVVFYATTISDVVRNPIVNYVNSKIYPAYDQIMET
KQDLLGNLGENNLSKSNMQFAIIEKTLVSDANTSVFTQAIGDSKKSILSTLNNDVLV
KELSQTGFNIQNFVKLEDFHFKLASLNSSRVQGVAF FEIVRSYIDPVKVS RDQAIMG
FLAAAALITWLCKVEPSKILDTSVFKSGMTACICVFGVAWLGNFVAGHEASIKEVA
GDWVKQSPAMLAVAFFASMLLYSQAATAKAIVPVIVTALGISATNPQDSYMLVACFA
AVSALFVLPTYPTLLGAVQMDDTGTTRIGKFI FNHSFFIPGVLAI AIAVALGFVVAPM
LM"
gene complement(117409..118815)
/gene="aspA"
CDS /locus_tag="DMACINML_00860"
complement(117409..118815)
/gene="aspA"
/locus_tag="DMACINML_00860"
/EC_number="4.3.1.1"
/inference="ab initio prediction:Prodigal:2.6"
/inference="similar to AA sequence:RefSeq:CAL34258.1"
/codon_start=1
/transl_table=11
/product="aspartate ammonia-lyase"
/protein_id="Prokka:DMACINML_00860"
/translation="MGTRKEHDFIGELEISDEVYGVQTFRAVENFNISHERLKDFPR
FVRALARVKKAAAMANYELGLLDKDIQDAI IKACDKILEGGYYDQFVVDMIQGGAGTS
TNMNEVIANIALELMGHKKGEYQYLHPNDHVNLSQSTNDAYPTALHLALHDYLSDL
AKAMEHLKAYERKAEFEKDVLMGRTQLQDAVPMTL GREFKTFVMMGEDIQRVLEA
RKLILEINLGGTAIGTGINSHPNYPKVVERKIREVTGFEYTV AEDLIEATQDTGAYVQ
ISGVLKRVATKLSKVCNDLRLSSGPKCGLNEINLPKMQPGSSIMPGKVNPIPEVNV
QVCYAVIGADVTVTFASEGGQLQLNVFEPVIAYSLFNSIVMLEKAMHTLADKCIDGIS
ANEKICSDFVYNSVGIVTALNPYIGYENSASIAKEAMSTGKKVADIALERGLLSKEQI
DEILTPANMLNPHMEAKK"
gene 119078..119773
/gene="ung"
CDS /locus_tag="DMACINML_00861"
119078..119773
/gene="ung"
/locus_tag="DMACINML_00861"
/EC_number="3.2.2.-"
/inference="ab initio prediction:Prodigal:2.6"
/inference="similar to AA sequence:RefSeq:CAL34257.1"
/codon_start=1
/transl_table=11
/product="uracil-DNA glycosylase"
/protein_id="Prokka:DMACINML_00861"
/translation="MKEITINIDDIKINNDWKEFLKEEFKSYFLEIKKHYYIQALNNK
AIIYPPSNLTFNAFNL TPLNELKIVLLGQDPYHQPNQAMGLSFSVPYGIKIPPSLLNI
YKELKADLDIEPSKSGDLSSWAKQGVLLLSILSVEAGKPASHSSWGWFSDAVISK

```

```

LSLEKSGLIFMLWGN YAKSKKALIDTKKHFILEAAHPSPLARTGFLGCKHFSKANEIL
KNLGKKPINWQLA"
gene      119874..120566
          /locus_tag="DMACINML_00862"
CDS      119874..120566
          /locus_tag="DMACINML_00862"
          /inference="ab initio prediction:Prodigal:2.6"
          /inference="similar to AA sequence:RefSeq:CAL34256.1"
          /codon_start=1
          /transl_table=11
          /product="putative amino acid recemase"
          /protein_id="Prokka:DMACINML_00862"
          /translation="MKTIGIIGGMSFESTITYYKTINEAINNQLGNLNSAKILLYSVN
FEEIANLQNGEWEKAAQILGECACKLELGGADFILIATNTMHKIFHQIQKNTKIPLV
HIAQSTAKILKQQNIHTIGLLGTQYTMEDFYKNVLKEENIKTITPNQNDMQELSDII
FNELCRGKIKENSKEYLKI IQLKDEGAQGIVLGCTEIGLLISQKDTSIPIFDTALI
HALDAVNLALKD"
gene      complement(120563..120763)
          /locus_tag="DMACINML_00863"
CDS      complement(120563..120763)
          /locus_tag="DMACINML_00863"
          /inference="ab initio prediction:Prodigal:2.6"
          /codon_start=1
          /transl_table=11
          /product="hypothetical protein"
          /protein_id="Prokka:DMACINML_00863"
          /translation="MGKLERTIRIILAMVIFSIGVYYASWWALIGFIPLLTGIFGVCP
IRVWTGKQACPLGVCPISKKKD"
gene      120894..121517
          /locus_tag="DMACINML_00864"
CDS      120894..121517
          /locus_tag="DMACINML_00864"
          /inference="ab initio prediction:Prodigal:2.6"
          /inference="similar to AA sequence:RefSeq:ADT65502.1"
          /codon_start=1
          /transl_table=11
          /product="transcriptional regulator, Crp/Fnr family
protein"
          /protein_id="Prokka:DMACINML_00864"
          /translation="MDKEKILKEYFKNYNLENKDFEAMVEKSYFKEFDKNTILDDCLG
FVIVLKGGFRAFILGQNAKEITVFKLKQNEECVICSHCIFETISYNLTLESFDDTQIL
VVPVKIYSQLKDKYPLIANYTLNLI AKRFNSLINILEQALFTPLHHRVKMFLKENAKE
GKITFTHEEIALHLGSTREVISRILKTMQKEGFIQQRKEITLLKAL"
gene      complement(121598..121702)
          /locus_tag="DMACINML_00865"
CDS      complement(121598..121702)
          /locus_tag="DMACINML_00865"
          /inference="ab initio prediction:Prodigal:2.6"
          /inference="similar to AA sequence:RefSeq:ADN90311.1"
          /codon_start=1
          /transl_table=11
          /product="hypothetical protein"
          /protein_id="Prokka:DMACINML_00865"
          /translation="MLHALFLLVWPLVIYVSYKFIMLNINQLEKDNKL"

```

gene complement(121716..122840)  
/gene="cydB"

CDS complement(121716..122840)  
/gene="cydB"  
/locus\_tag="DMACINML\_00866"  
/EC\_number="1.10.3.-"  
/inference="ab initio prediction:Prodigal:2.6"  
/inference="similar to AA sequence:RefSeq:CAL34255.1"  
/codon\_start=1  
/transl\_table=11  
/product="cytochrome bd oxidase subunit II"  
/protein\_id="Prokka:DMACINML\_00866"  
/translation="MFFGLELGGGLQIYWVILSLLGGLLVFMFFVQGGQTLIDELSSD  
ELEKTMLVNSLGRKWELGFTTLVLFGGAAFAAFPLFYSTSFGGAYWAWLCILFCFILQ  
AVAYEYRKKENNVYGSKTYEVFLKINGYLGVFLIGVAISSFFSGSHFVLNEHNFVSWQ  
NPLRGLELLFNPFNLLGIALVFLSRILGAAYFMNNIKDENIKAKAVKKLSINSILFL  
PFFLGFLAWIFIKEGFGVDEKGVSMANVYLYNFDNLIFAILFIIIGVVVLLGMIQ  
GSKGCSKTIFTLGFGSVLTVFALFLSIGLSSAFYPSLSDLQSSLTIIHNASSSYTSL  
VMAYVSLLPFVLAIVYVWNAMDRVKITREEMKDSEHLY"

gene complement(122840..124402)  
/gene="cydA"

CDS complement(122840..124402)  
/gene="cydA"  
/locus\_tag="DMACINML\_00867"  
/EC\_number="1.10.3.-"  
/inference="ab initio prediction:Prodigal:2.6"  
/inference="similar to AA sequence:RefSeq:CAL34254.1"  
/codon\_start=1  
/transl\_table=11  
/product="cytochrome bd oxidase subunit I"  
/protein\_id="Prokka:DMACINML\_00867"  
/translation="MSELSSVDWSRAQFALTALYHFLFVPLTLGLSFIIAIMETIYVK  
TGNERWKKITKFWLSLFAINFAIGVATGIIMEFEFGTNWANYSWFVGDIFGAPLAVEG  
IMAFFLEATFFAVMFFGWDKVSCKFHLVSTWCVAIGSNLSAFWILVANGWMQYPVGMQ  
FNPDTARNEMQSFFEVAFSPVAISKFLHTIGSGYVISALFVMGISAWFILKGRHIEA  
KKSLVVGASFGLVCSVFLFFSGDESAYRVTQTQPMKLAAMEGVYQGEHRAGLVPFGL  
NPKKTIDNNEVFLFDITIPYALSILGNRDPNSFVPGIEDLIHGNEDRGIEPMQERID  
KGKIAIQALKDYRLAKDNDTMAMAIHKSILEANFKDFGYGYLEKPTDAIPPVALTFY  
SFHIMVALGSLFFLLFIATLYLTMANDIEKFRKILWLCLLCIPLGYIAAEAGWIVA  
EVGRQPWAIQDLMPVHVAATELGKVVQISFWIFAVLFTALLIAEIKIMLTQIKKGFDAH  
AGHSTLMGKGEK"

gene complement(124402..124632)  
/locus\_tag="DMACINML\_00868"

CDS complement(124402..124632)  
/locus\_tag="DMACINML\_00868"  
/inference="ab initio prediction:Prodigal:2.6"  
/inference="similar to AA sequence:RefSeq:CAL34253.1"  
/codon\_start=1  
/transl\_table=11  
/product="putative membrane protein. Functional  
classification-Membranes, lipoproteins and porins"  
/protein\_id="Prokka:DMACINML\_00868"



```

/translation="MYLKCFYFFFMRIFNFYKEGFKNLTLGKTLWKIIFIKLFIMLVI
LKLFDVDFVNSIFKNDNEKSNFVIENLIKEK"
gene      125119..126786
          /gene="lctP"
          /locus_tag="DMACINML_00869"
CDS       125119..126786
          /gene="lctP"
          /locus_tag="DMACINML_00869"
          /inference="ab initio prediction:Prodigal:2.6"
          /inference="similar to AA sequence:RefSeq:AAW34667.1"
          /codon_start=1
          /transl_table=11
          /product="L-lactate permease"
          /protein_id="Prokka:DMACINML_00869"
          /translation="MWQQIYDPFNSIWLSALFAFLPILCFLACLVFFKLGKYQAGFLT
VVLASVIALFVYDMPWNLVGASFVQGFTNGMWPIAWIIIAIFLYKLSIKSGSFEIIK
KSVMSITPDHRIQVILIGFCFGSFLGAIGFGGPVAITAALLVGLGLRPLQAAGLCLI
ANTAPVAFGAVGIPIIAMANLVGVEAHSVSAMVGRMLVPLSLTIPFFIVFLMDGLKGV
KETFPAILVAALSFTATQFWSSNHLGAELPDIISAIIVSLAVTTIFLKFWKPKNIFRLD
GETHFTEDNTLNFQDVLKAWTPFILLIICIIWTQPWFKAIFDKDGFLSYTSITLQFS
NLTGGILSPSITGIGEAKPLSLGLGIDLINGKTVAQAGTAILLAFLTIAVLRIKAED
AAECFWATLKEMAIPCLTIGLVAFVAFISKNSGMSTTLGLAFAHTGDAFAFFSPIIGW
IGVFLTGSDTSANLLFGTLQQVSAQKLGVSEALFLAANSVGGVVGKMISPQSIATACA
AVGLVGKESDLFKFTLKYSIAFIILIGIWTTCIIAFFLPGIPEVVAK"
gene      126939..127676
          /locus_tag="DMACINML_00870"
CDS       126939..127676
          /locus_tag="DMACINML_00870"
          /inference="ab initio prediction:Prodigal:2.6"
          /inference="similar to AA sequence:RefSeq:CAL34248.1"
          /codon_start=1
          /transl_table=11
          /product="putative oxidoreductase iron-sulfur subunit"
          /protein_id="Prokka:DMACINML_00870"
          /translation="MKKVYFYATCLGTAAMQESVLNGIKLLRREGVEVIFKKNQTCCA
QPFSNSGYFNESREIALYNVDLFDKDYPIVPSGSCAGMMSHDYKELFKDRPEFSRVK
DFSSRVIELSQYLDEVLNVNYEDKGEPIKVTWHSNCHALRVQKSIQASKNLIRKLNK
ELVELQYEECCGFGGTFVKEPEISNAMVRNKIKDIQNTGVKYLISGDGGCLLNIDG
TMRRMGLDVKGIHLYEFLFKRLEGERL"
gene      127673..129112
          /locus_tag="DMACINML_00871"
CDS       127673..129112
          /locus_tag="DMACINML_00871"
          /inference="ab initio prediction:Prodigal:2.6"
          /inference="similar to AA sequence:RefSeq:CAL34247.1"
          /codon_start=1
          /transl_table=11
          /product="putative iron-sulfur protein"
          /protein_id="Prokka:DMACINML_00871"
          /translation="MSQKIPHEEIVHIKLNDIQMRENLMTAMHTLQKNRLGVIDARFQ
DWQGLRAKAKQAKNNALMSLKDRLLFEKFNATKNGIQVHWASSEDACEIVYEIMREK
NITKLLKGKSMASEEIGLNHYLEKKGLKAIETDLGELILQLNEEPLHIVVPAIHRNR
HEIGQIFKDKLGAKLENDEPESLNAIARDHLRKDFEGLKLGSGVNFAMSREGAFWLI
ENEGNRMCTTAPDIHIALCGVEKVMESFEDAATMVSLTTPSATGQFIPTYNNIITGP

```

RKNGLDGPKEVHVILFDHNRTKMLAHKDYREALRCIRCGACMNFPCVYDQIGGHAYQ  
TTYPGPIGEVISPNIFFIDHTGDILNFCSLCGRCEVCPVQIPLADLIRKLRCDKIGQ  
GENPPMGAKNIHNAMEAFKQFKKAATKGERWRFALSKAHYFNWFVQNLGALPVI  
KKWYAFKELPQIKKDLYKEIQAIIEGVIYE"

gene 129105..129761  
/locus\_tag="DMACINML\_00872"

CDS 129105..129761  
/locus\_tag="DMACINML\_00872"  
/inference="ab initio prediction:Prodigal:2.6"  
/inference="similar to AA sequence:RefSeq:CAL34246.1"  
/note="conserved hypothetical protein Cj0073c"  
/codon\_start=1  
/transl\_table=11  
/product="hypothetical protein"  
/protein\_id="Prokka:DMACINML\_00872"  
/translation="MSKINEISNKSKEKILSALNEAYEAKDFTYQASIDPVEHIQTKE  
DALAEMKQKMSDNKYIVENATKETLEEKINEIITKYNKYKMIYGTDLGLDLNKIQAE  
KICFDKEIENLRYEVFHSDFSIHARAGVSSHGVALIPSSKGQPRMLSLAPKLCIVLL  
KKEDIVKSLSEALNLVKTENEILPTNILFIAGPSRTADIELITVFGVHGPQIAHIVY  
"

gene 129948..130670  
/locus\_tag="DMACINML\_00873"

CDS 129948..130670  
/locus\_tag="DMACINML\_00873"  
/inference="ab initio prediction:Prodigal:2.6"  
/inference="similar to AA sequence:RefSeq:AI123819.1"  
/codon\_start=1  
/transl\_table=11  
/product="hemerythrin family protein"  
/protein\_id="Prokka:DMACINML\_00873"  
/translation="MQIIEIYLEKTLDKLIPAWDEKYSINDEKIDAQHQLFELA  
ENAVYKFVQRDELKEILTELFNYMKEHFSNEEDYMQEISYPYLNEHKIMHKNIHDM  
HLIQNIKTNDLKEKLYTIMSDWLEHILHHDVMIGNWLEQLLAKQEELEKLQVED  
LQQEEKQYENPNPIPQVKTEYDFIYSCPCRTNHFLSYIEHLDIICHKKQLRCKKCQ  
NLFYVRSEIKTEKRNDVSKVG"

gene 130651..131262  
/locus\_tag="DMACINML\_00874"

CDS 130651..131262  
/locus\_tag="DMACINML\_00874"  
/inference="ab initio prediction:Prodigal:2.6"  
/inference="similar to AA sequence:RefSeq:ADN90300.1"  
/codon\_start=1  
/transl\_table=11  
/product="Non-heme iron protein, hemerythrin family"  
/protein\_id="Prokka:DMACINML\_00874"  
/translation="MFPKWDDNYSVHNAKIDEQHKLFELAGKVEFMFDRPVYKDDIK  
ALLADFFNYMKDHFNDEEKYMKLIGYDLEEHKKIHKEIIQSMIDLKNIKSTNDLKE  
KLYTVSKWLEHILYEDMKVEQYRRSSLSSEDDSEVSFEVKEEKDDETALYFYTC  
CVGQIHDVPGIHKIQLKGAKFKCKCKMAIQFYKKSSESFE"

gene complement(131491..132522)  
/locus\_tag="DMACINML\_00875"

CDS complement(131491..132522)  
/locus\_tag="DMACINML\_00875"  
/inference="ab initio prediction:Prodigal:2.6"

```

/inference="similar to AA sequence:RefSeq:CAL34243.1"
/note="hypothetical protein Cj0069"
/codon_start=1
/transl_table=11
/product="hypothetical protein"
/protein_id="Prokka:DMACINML_00875"
/translation="MKKNIVFFEVRGGSDKGEDGYRKDTMPMVNALKAKGWNAEVIFF
EVGKKDEIYNYVKENFDGYVSRINPGNLKEENEYFDMLRKLCEGLVGMPPHDAMIGY
GAKDALTKLADTDLVPSDTYAYYDIKTFKENFPKSLAKGERVLKQNRGSTGEGIIWRVS
VEGEAKGEVLPDITIKCTEAKDNHVEHRELGEFMDFCQYIIGDNGMLVDMTFLPRI
KEGEIRLLMLYNTPVNVVHKKPAEDADAFSATLFSGAQYRYDKPEDWQNLVDMFLGEL
PKVRAKLGNYDLPLIWTADFILDNDEKGNKDYVLGEINCSCVGF TSHLELADEVAQNI
INIVSKAKN"
gene complement(132636..133532)
/gene="pspA"
/locus_tag="DMACINML_00876"
CDS complement(132636..133532)
/gene="pspA"
/locus_tag="DMACINML_00876"
/inference="ab initio prediction:Prodigal:2.6"
/inference="similar to AA sequence:RefSeq:CAL34242.1"
/codon_start=1
/transl_table=11
/product="protease"
/protein_id="Prokka:DMACINML_00876"
/translation="MQILKSFFKGLGSVIKFINTYFKTFVLLLIVVWLFTPSSNSNSS
YANLERIDLKGEILDSSEVLEKIINAKNNDNIKGVLFVIDSPGGAFAPSMELALAIKD
LKAKKPVIAYASGTMASGSYLAGVGANKILANPASFIGSIGVIMQGADLSELAKKIGI
KEQTIQAGEFKSAGTLTRAWSEKEREFLQNLINESYDLFSEFVAKERNLELDKRNDDWA
NARVFLAQNAKDLGLIDELSNYENAKKELQELAKVLNPIWKEEGRIDRFLNRLESQSS
NFLSKVMGDVILRLNANALELK"
gene complement(133520..134749)
/locus_tag="DMACINML_00877"
CDS complement(133520..134749)
/locus_tag="DMACINML_00877"
/inference="ab initio prediction:Prodigal:2.6"
/inference="similar to AA sequence:RefSeq:CAL34241.1"
/codon_start=1
/transl_table=11
/product="putative amidohydrolase family protein"
/protein_id="Prokka:DMACINML_00877"
/translation="MYIISAKYIFLCDEQFSILENKAFVFEDKILELGELEELKKRYP
KAKLIK TSPNCVILPAFINPHTHLEFSANSTTLHFGEFLTWLKSVIKSRSMLENAKE
ELILTNIQMQKSGIGTIGEISSFGSDLNPCVKASQNGMRVIFNEILGINEAQIQDK
KQEFLTRFENSLKFKDEFMPAISVHSAYSTHPELAKFATNLAKKQKLLISTHFLESK
AENAWLKEAKGGFKWFKNFTPNPKPLYKVSEFIQLFKGIRTLFTHCVYLKEMDLLDK
NLHSITHCAFSNRLLSQKTFDLKALKSGLNIHLGTDGLSSNISLSILDEMNRANLLVH
TNFDLLKLAPKLLQMATLYPAKALNLLNLSGEIKQKGIADFSVFELGECDEKQAPLQFIL
NAKEVQKLFIKGKECKF"
gene 134842..135330
/gene="aroQ"
/locus_tag="DMACINML_00878"
CDS 134842..135330
/gene="aroQ"

```

```

/locus_tag="DMACINML_00878"
/EC_number="4.2.1.10"
/inference="ab initio prediction:Prodigal:2.6"
/inference="similar to AA sequence:RefSeq:CAL34240.1"
/codon_start=1
/transl_table=11
/product="3-dehydroquininate dehydratase"
/protein_id="Prokka:DMACINML_00878"
/translation="MKIMVIQGPINMLGVREVGIIYIGAMKEDIHTQMKAASQNNVE
LDFEQSNFEGEIVDKIQECLGTVDGIIINAAGYTHTSVAIRDAISAVALPTIEVHISN
VYRREEFRQKSLIAPVCSGSIVGFGPFGYHLALMGVIQICEQVKNLRAAQAQMQAGA
QN"
gene      135333..135815
          /gene="folK"
          /locus_tag="DMACINML_00879"
CDS      135333..135815
          /gene="folK"
          /locus_tag="DMACINML_00879"
          /EC_number="2.7.6.3"
          /inference="ab initio prediction:Prodigal:2.6"
          /inference="similar to AA sequence:RefSeq:CAL34239.1"
          /codon_start=1
          /transl_table=11
          /product="putative
          2-amino-4-hydroxy-6-hydroxymethyl dihydropteridine
          pyrophosphokinase"
          /protein_id="Prokka:DMACINML_00879"
          /translation="MLKIKGARRLETSRFFPYFSQKKKGFYKYLALVGLGSNIEPEKTR
          FNKLFVRMMEDKRFKILATSPFLINEAFGFKAQKDFTNATMLMQTNLHARAFKLVLLF
          YELKFKRRTFKNAPRTLDDLDFYSQKVKRDEGCMVPHGTGANQRISVILPLGLTKGL
          "
gene      135816..137246
          /gene="flhF"
          /locus_tag="DMACINML_00880"
CDS      135816..137246
          /gene="flhF"
          /locus_tag="DMACINML_00880"
          /inference="ab initio prediction:Prodigal:2.6"
          /inference="similar to AA sequence:RefSeq:CAL34238.1"
          /codon_start=1
          /transl_table=11
          /product="flagellar biosynthesis protein"
          /protein_id="Prokka:DMACINML_00880"
          /translation="MGQLIHTFTVEDTEQIIPKVKEDYGDKALIITNKQIRPKTLNRA
          ALYEVMAIEESDYEEHLKMGKSLPPKKTIAKTLEKQNL EKVNASIPQNNEDEDVI
          LDFSNTRANLAKTKTNDTNYQSFQSKINPNPTMGFNDFKERLSEVSNEISKVTNTPL
          VDNYAPNPYNKKIENFEKQINKLNDKIDLLADMMWDEKAEARNNLIIPPEFATIYKK
          AKESGMLEKHLEAIMKATIENMPAAMKTNKDAVQRYFYSLLRNILPCRVSEIKKQKI
          MMLVGPTGVGKTTTLAKLAFRYAYGDKRYKTGIITLDYRIGAVEQLFQYAKMMKLPI
          IDSIIEPKDLDEAIKSLNCEVILVDTIGNSQYDQNKLAKTKEFLMHSNAEIDVSLVVS
          ANTKHEDLMEIYKNFSFLNIDTLIITKFDETKVFNGIFSLIYETNIPLSFFSTGQVEP
          DDIEVANSDFLVCILEGFNKGKDNE"
gene      137239..138105
          /locus_tag="DMACINML_00881"

```

CDS 137239..138105  
 /locus\_tag="DMACINML\_00881"  
 /inference="ab initio prediction:Prodigal:2.6"  
 /inference="similar to AA sequence:RefSeq:CAL34237.1"  
 /codon\_start=1  
 /transl\_table=11  
 /product="putative ATP-binding protein"  
 /protein\_id="Prokka:DMACINML\_00881"  
 /translation="MNNQANKLRSLMNQNGGKKSQNTHFIAITSGKGGVVKSTISANL  
 ANVLANNQYKVGLFDADIGLANLDVILNVRIQKLLHVLGRGCSLEDILIEVKPNLWL  
 IPGESGDEILKYNDKNIYERFLNQASILDELDFLIIDTGAGIGGNILNFLEMSDEVVV  
 VTVPDPAAITDAYATIKTTSKTKENLLMLFNVVKNENEALKVFENIKKVADANIKNHL  
 KLEFLGHSASKDVSIGSIKKRTLFTDENSASSDELKALASKLLYRLERKVLVDNVTSR  
 FSNFFRKIIERF"

gene 138125..138481  
 /locus\_tag="DMACINML\_00882"

CDS 138125..138481  
 /locus\_tag="DMACINML\_00882"  
 /inference="ab initio prediction:Prodigal:2.6"  
 /inference="similar to AA sequence:RefSeq:CAL34236.1"  
 /codon\_start=1  
 /transl\_table=11  
 /product="putative integral membrane protein"  
 /protein\_id="Prokka:DMACINML\_00882"  
 /translation="MRPENYVAFFTVCGFFIGLAFSVISIEEAFDILIFTFCFITFMFY  
 VFIHIAIMNFIDIKKISGRIFNKHDYEKTSNNIINDLVIREKKMDIILEKLNREEREL  
 KKNESKERRKNAKRAA"

gene 138462..139154  
 /gene="fliA"  
 /locus\_tag="DMACINML\_00883"

CDS 138462..139154  
 /gene="fliA"  
 /locus\_tag="DMACINML\_00883"  
 /inference="ab initio prediction:Prodigal:2.6"  
 /inference="similar to AA sequence:RefSeq:CAL34235.1"  
 /codon\_start=1  
 /transl\_table=11  
 /product="RNA polymerase sigma factor for flagellar operon"  
 /protein\_id="Prokka:DMACINML\_00883"  
 /translation="MQKEPPKAYAQMIDKDEQDLVLSYMPALRAMAFRLKERLPSSID  
 VNDLISIGVEEMIKLSRRYDKEQNDSFWGFARKRVNGAMLDLFLRSLDVMSRNNRKIIK  
 DIDILIDEYFREHEEPPDDEYLAQKLGLDIEKIKEVRTAHAISYTLSDDDQLELYNED  
 DTLEKLEKEQLLEKIHEVLEDLKERDQLIIQLYYYEELSKEISEILEISESRISQIH  
 KKLLKLRERLV"

gene 139154..140233  
 /gene="fliM"  
 /locus\_tag="DMACINML\_00884"

CDS 139154..140233  
 /gene="fliM"  
 /locus\_tag="DMACINML\_00884"  
 /inference="ab initio prediction:Prodigal:2.6"  
 /inference="similar to AA sequence:RefSeq:CAL34234.1"  
 /codon\_start=1

```

/transl_table=11
/product="flagellar motor switch protein"
/protein_id="Prokka:DMACINML_00884"
/translation="MAEILSQEEIDALLEVVDDNTDTPTASNSKDGKDERNIVVYDFK
RPNRVSKEQLRTIKGIHDKLARNLASQISSMMRSIVETKLHSVDQMTYGEFLMSLPSP
TSFNVFSIKPLDGNCVLEINPSIAFPMIDRLLGGQGDSYEASRELTDIENLLDSILR
IIMQRLKESWATVTEIYPSIEAKESSPNVQIVSQNEIVIMVVMEIIIGNSSGMVNIC
YPVVHLESILSRANRDIMMGETSAKKSRNKELKTLIGRAEVVYEAILGKTLINVHEF
LELKQGDILRLDREADDKAIVSIDKKDVFLAQIGLHRFRKSIKILELIRTDKDEIKEI
LERYEEERKAKASVYDEPEEEEEEEI"
gene 140230..141066
      /gene="fliY"
      /locus_tag="DMACINML_00885"
CDS 140230..141066
     /gene="fliY"
     /locus_tag="DMACINML_00885"
     /inference="ab initio prediction:Prodigal:2.6"
     /inference="similar to AA sequence:RefSeq:CAL34233.1"
     /codon_start=1
     /transl_table=11
     /product="putative flagellar motor switch protein"
     /protein_id="Prokka:DMACINML_00885"
     /translation="MINEFLKLFTECTSTIEGLTGKSAEFSEYKEFDVSSQDTLKPP
LVYAVFNIKEGGKIGILAGAVLMSAIGEWMMGEEEEISKNDQLGPDEMDDAAKEAIQNI
SAFSTTLGAQKDIPKMDFEISSCFVAENVDFKDFTKLYFFDVKIEDLEEQISLIVDQ
TLHNILSGKAADDGHAHSSNSSENKGFSEELKNINLIMDVRLPVRVRIGNKKMLLK
DVLTMDIGSVVELNQLANDPLEILIGDKRIAYGEVVIVDGNFGVQITEIGSKKERLEQ
LR"
gene 141134..142279
      /locus_tag="DMACINML_00886"
CDS 141134..142279
     /locus_tag="DMACINML_00886"
     /inference="ab initio prediction:Prodigal:2.6"
     /inference="similar to AA sequence:RefSeq:CDH61953.1"
     /codon_start=1
     /transl_table=11
     /product="FIG00470444: hypothetical protein"
     /protein_id="Prokka:DMACINML_00886"
     /translation="MINGINSYSSYNYTSTFNNTFNTKSSNIINDNSNLVSDKSGAVS
KILGYGVDKDGFFTSDFNEAAGLPKDYKIYAKDIENFVNIQTKSLSSYINIDIAKSI
GNAYKVFSQLLNDELNNKINFTEKEDLVKIPQGFQNTLEINKKYNLNDKEYKDFMS
NYQNYSPSTSHNIKIMTFFSLDDKSDIFKYSIDPTYPYNNDKTITKSGIFMTFFTGFQ
AKNYFIEGQTSILGKMQGFDKTMSQSEIDNLNKFISENSMNFKGNIFKLFDLLNSDMS
IDDFKQKILEQKENLNNPTKSTNNKETSEEDKKKPKPIQAQSSSEYTKDDSKMNEEL
KKLLETKFGTSDELEILFGMKFSDDDTGEFNKILSLNSAPKSIDIKA"
gene 142315..143385
      /locus_tag="DMACINML_00887"
CDS 142315..143385
     /locus_tag="DMACINML_00887"
     /inference="ab initio prediction:Prodigal:2.6"
     /inference="similar to AA sequence:RefSeq:CDH61953.1"
     /codon_start=1
     /transl_table=11
     /product="FIG00470444: hypothetical protein"

```

```

/protein_id="Prokka:DMACINML_00887"
/translation="MIGINSTFNNSFVNLNIKNNNNSSLNSNTNVKNLQDTKQYSKTS
NKVLDYEIDNEGYFTSDFNEKAGIPKDIKHSSTMENFIKAQNNGLSKSYANIDI AKT
VGNAYKIVSQLVEKTPQLKRKSSFSKEDLANYFPQNYLIDKNTLEVKQTFSEEMKDI
IAKGGFKNINENEKLSPSFFNFDNTDEKSELLPFNPDILHSAKNTALSWDTSADKYTN
NDGSITMGLLIGFLSNVNTGVTAQPLIAGETTVWGKLQGLDNSLSENEIKELENNKL
SNTYFSNLSDAFALLNGTSDIKEFENKLNLSLNQNNKTNSSNFLEWVQKITKEHQKSLF
EILKQPDNINKIYLLINIDIRA"
gene 143502..144107
/locus_tag="DMACINML_00888"
CDS 143502..144107
/locus_tag="DMACINML_00888"
/inference="ab initio prediction:Prodigal:2.6"
/inference="similar to AA sequence:RefSeq:ABS44176.1"
/codon_start=1
/transl_table=11
/product="lysine decarboxylase family protein"
/protein_id="Prokka:DMACINML_00888"
/translation="MDTKISQDLEKFANIPNLKNAITFFGSARLKEDSFYYQEAKKLA
NLCVENGFVSGGGGIMRAANAGAAKCKNDANFIKSVGFNILLPFEQKLNDFVEYN
ITFESLAIRKMALIEKSLAFVIFPGGFGLDELCEVLTCLKQLGFKNNVPIILFGSEFW
QGFDEFVRNSLLKLEVISKGDELKYEITDDLDIINTLKL"
gene 144107..145123
/locus_tag="DMACINML_00889"
CDS 144107..145123
/locus_tag="DMACINML_00889"
/EC_number="2.1.1.61"
/inference="ab initio prediction:Prodigal:2.6"
/inference="similar to AA sequence:RefSeq:CAL34227.1"
/codon_start=1
/transl_table=11
/product="tRNA
(5-methylaminomethyl-2-thiouridylate)-methyltransferase"
/protein_id="Prokka:DMACINML_00889"
/translation="MKILVAMSGGVDSTVTAYKLNAGHEVIGCYMKLHGKPNYHEEN
IKKVEKVANFLQIPYHVLDLQEDFKNKVMPFVDTYKEGKTPNPCALCNRFIKLGLL
EFAKSLGCEKLATGHYARLENNLIRTADESQSYFLASADKEALKYLIFPLGEMKK
EDVKKFASTIEVLKSFATQKESSEICFVEDTYVQVLDQFMDTKIPGEVLDSSGKVVGK
HEGYMHYTIGKRRGFVARGAHEPHFVLKINPKQNQIIVGTKEELKINEFKLNINLFI
DAKELDCEVKIRYRSKSTPCKVIIISDDKSASISLKESVYGLASGQMAVFYDDDKVIAS
GFIE"
gene complement(145158..146966)
/locus_tag="DMACINML_00890"
CDS complement(145158..146966)
/locus_tag="DMACINML_00890"
/inference="ab initio prediction:Prodigal:2.6"
/inference="similar to AA sequence:RefSeq:AJP34568.1"
/codon_start=1
/transl_table=11
/product="Putative malate transporter Yf1S"

```

```

/protein_id="Prokka:DMACINML_00890"
/translation="MEKKKIPMLILCILIALAFWIIPTPIGLEENSWHFLGLFIAVIM
AVILQVMPLGAVCMIAIAIVALSGITTTQSSVRATHIKTLEAIVLKDNSNIYKVAMDK
KSQASVLENLIKANVAKNLEPKVNEILKSNSNIEYQIDSLSKLYAKATSKVATQKLV
ESKIAALNSLALFMSQKDIDEKVNTAISLKSSTGKIDALSGFSNSLIWLIIVSII
ARGVIKTGLGERLAYFISIFGKKTGLIAYSIAFCETILAPVTPSNTARAGAIINPIV
QAIARFSTPEDGTQNKIGTYLSLVNFQANPISSAMFITATAPNPLVVDLVAQATNL
EVHLTWGQWALGMFLPGIAAMLMLPLVIYFLSPPEIKSTPNAKIFAKGKLEELGAMKG
SEKIMLGVFVLLLLLWAGALGFLFGISLDATSVALLGLSLVLVSGVLTTFGEVLAEKAA
WNTLVWFSALVMMATLLGKLGVTQFLAEALGEFASAMGLGEISIMIFLSLAFLYTHYF
FASTTAHISAMFFVFYSAGLALGAPLLYAFIMIASGNVMMALTHYATGTAPVIFGTG
YVSLKKWWSVGFVISVIDITVMILVGLVWVKFLGFY"
gene complement(147482..149119)
/locus_tag="DMACINML_00891"
CDS complement(147482..149119)
/locus_tag="DMACINML_00891"
/inference="ab initio prediction:Prodigal:2.6"
/inference="similar to AA sequence:RefSeq:CAL34223.1"
/codon_start=1
/transl_table=11
/product="flagellar hook protein"
/protein_id="Prokka:DMACINML_00891"
/translation="MMTSFYNGLSGVKTNSTFDIDVAANNIANVNTMGFKYSTTQFKDI
FYSTITSQSTNPTQGGYGTGAASSQIVFEQGSPPVASEGEFDVALQGGKFFGVLGADGE
AYYTRNGAFRRDAAGNLVDSYGNFVLGTMNPAFAGVSYSRDRVAGLMDYLNLTGTPVNS
GFTVNSNDVFNIGTTASQGVKVPVNMYPQVQTQNVKWSGSLNNTATTEVVKVDLDP
AKFNVQKTEDGKYIVSGSVSKEDVFSKAGDRILLNFIDNNGVKTSFEATLDENLNFT
SNELDLKGLDPNSIKLETAQISTEQKANKDILESSIYNADGSKSILRLTLERILPQE
GENIQYKAIQIFNSDGEAVGNPTEGSMVFDKNGALLQNNITSIANPDGGTINIDLGT
PYDANKPGSGYSGIYIKEGVAKNIVTQQDQVAEGFFDQYSISDDGSIVAQFSNGKAAI
VGKLLALYNFINEQGLAAMGDNIIFAATANSGDASFIMKDGQVINTAEFKGGFLEQSNVD
LSVQLSNLIATQKSFDASSKSITTSQMIQKAINMKR"
gene complement(149123..149998)
/locus_tag="DMACINML_00892"
CDS complement(149123..149998)
/locus_tag="DMACINML_00892"
/inference="ab initio prediction:Prodigal:2.6"
/inference="similar to AA sequence:RefSeq:CKG56285.1"
/codon_start=1
/transl_table=11
/product="flagellar basal body rod modification protein"
/protein_id="Prokka:DMACINML_00892"
/translation="MLTSSDWTMTNTNTNTNTATATTTSTNTTSDTSSTSSSGLAS
NPATLDKDAFLKLLLIQLHQDPTDPMDSKMLTQTSQLSALEMQQNTNTTMQKMVE
TMQLLSNSFSTSMSTSAIGAIGKMATVSDNKIKLTGSDEIIALKMYLPEDSDENGVTL
EVYDSNNKLVFSEKSGEQSVSQGLFTMEWPGRNNDGVYAGDGEYTKMVYNNKNGEKI
TANYGTYPYIEGIFKEGLAYAKMAGQEVFPDAITEITDYKLSSSSSTGSGSSGSDSSG
GSSGTTEDSESEERA"
gene complement(150055..152127)
/locus_tag="DMACINML_00893"

```



CDS complement(150055..152127)  
 /locus\_tag="DMACINML\_00893"  
 /inference="ab initio prediction:Prodigal:2.6"  
 /inference="similar to AA sequence:RefSeq:ALW54855.1"  
 /codon\_start=1  
 /transl\_table=11  
 /product="flagellar hook-length control protein"  
 /protein\_id="Prokka:DMACINML\_00893"  
 /translation="MSNLTPSNDILNLTPSKTNTTHSSSSKTKEQDLKKSNDTTQDDT  
 ESFLNSLLNSIEETNEFLPDHMKISQKEVVNEAMDKLQNGVFSSEDKISIFESASFMQ  
 ILSLLDKLKADTADIKLANLSTQLSQLVKTEANFNALKSASNLSELLNIAKDLGLNVK  
 NIKVDRLLDLKATFPNLDKANFFKGAVDNVFKEIINNKLAIHISKNLNQNVLNHTSH  
 ANLNQNSKNIKSKDDTSLLSQTLKNLDAIISSEKNEKKDKAEIKNDNVKIQTGETTEL  
 KNTSKNLNHSESLKELDQENLTNNDKKLPNQEVQNKEHTKELKNDKNTLLNEPLKDD  
 KELKNTNKANAQDLTPSKNNTTQDKLPMQEKVSTQEKTMPQEKVSTQEKTIQLDNKAS  
 VQEKPLNNKEGLNQETNNIKNTKDLNQLDKNNLSENPKQVKNENTNFKNTSNKEN  
 IRDSQNLNLNPKDLNLNKNKSSVKDNTLKDIKQNFTEQKVSFENLKTQFVSNKD  
 NTFNTHYTNKENYQEQGKIQSENTEKNPLDDLNSLVKDLNKISQNNTKNITPKETLQ  
 HFSQDLKAAMEQYKAPITKLSITLNPHNLGEVEVTLVQRGNLHINFNSNTNAMNLF I  
 QNQAEFKNSLVNMGFTGLEMNFSDQGKREQNQNGKNRSGYGFKDALEGKTENEKVN  
 ELVLAKYF"

gene complement(152141..152464)  
 /locus\_tag="DMACINML\_00894"

CDS complement(152141..152464)  
 /locus\_tag="DMACINML\_00894"  
 /inference="ab initio prediction:Prodigal:2.6"  
 /inference="similar to AA sequence:RefSeq:CAL34220.1"  
 /note="hypothetical protein Cj0040"  
 /codon\_start=1  
 /transl\_table=11  
 /product="hypothetical protein"  
 /protein\_id="Prokka:DMACINML\_00894"  
 /translation="MSKPLNTEFFIELDTQLINRKSEVLLQVLDLLETLSNQNEKMA  
 RISSELTELENEENLEKITNAQNLEELLDILVALNEDKMIKVYENAYLKEKFPHLAS  
 SQFLK"

gene 152593..154401  
 /gene="typA"  
 /locus\_tag="DMACINML\_00895"

CDS 152593..154401  
 /gene="typA"  
 /locus\_tag="DMACINML\_00895"  
 /inference="ab initio prediction:Prodigal:2.6"  
 /inference="similar to AA sequence:RefSeq:CAL34219.1"  
 /codon\_start=1  
 /transl\_table=11  
 /product="GTP-binding protein TypA"  
 /protein\_id="Prokka:DMACINML\_00895"  
 /translation="MENIRNIAVIAHVDHGKTTMVDELLKQSGTFSEREQISERVMS  
 NDIEKERGITILSKNTAINYKGTKINIIDTPGHADFGGEVERVLKMGVLLLVDAQE  
 GVMPQTKFVVKKALSGLKPIVVINKIDKPAADPERVINEIFDLFVALDANDEQLDFA  
 IVYAAAKNGYAKLDLNDSDNMEPLFKTILERVPAAPSGTNNPLQLQVFTLGYDNFVG  
 KIGIARIFNGVVKKNQSVMLAKADGTVNGRISKLIGFMGLEKMDIEEAGSGDIVAIA  
 GFEALDVGDSVDPNPNMPLDPLHIEEPTLSIVFSVNDGPLAGTEGKHVTSNKIAERL  
 EAEMKTNIAMKYESTGEGKFKVSGRGELQITILAENMRREGFEFCMGRPEVIVKVEDG"

VKTEPFEHLVIDVPEEFSGAVIEKLGKRKAEMKTMAPTGDGQTRLEFEIPARGLIGFR  
 SQFLTDTKGEVGMNHSFLEFRPFGAVEKRNNGALISMENGVALGYSLFNLQERGVLF  
 IEPQTKVYTGMIIGEHSRPNDLDVNPICKGNLTNVRASGSDDAIKLVPPRKLSLERAL  
 EWIEEDELVEVTPQNVVRKRYLDPTQRKRMEKAKS"

gene 154401..155051  
 /locus\_tag="DMACINML\_00896"

CDS 154401..155051  
 /locus\_tag="DMACINML\_00896"  
 /EC\_number="2.7.7.-"  
 /inference="ab initio prediction:Prodigal:2.6"  
 /inference="similar to AA sequence:RefSeq:CAL34218.1"  
 /codon\_start=1  
 /transl\_table=11  
 /product="putative poly(A) polymerase family protein"  
 /protein\_id="Prokka:DMACINML\_00896"  
 /translation="MDLKSLNRRLYILKRLGILKFLSIIIEALLVGF LAFVFTKDILI  
 AIILAVFVGIFFRFTAKKLLAKKELEFDALNFLRRFGAKFRKESLSQKDFLKLEL  
 SDNLKDFKSQNCFEFKEFKIYDIHFIDENKRFFCGILLEILKPSKNPSFEDEEKIYVK  
 LQDNFTLNHIFSKDNHYLIATLKNPFFIDLKESLEKNFKNLENNLKLIEEKIIKI"

gene complement(155048..156397)  
 /locus\_tag="DMACINML\_00897"

CDS complement(155048..156397)  
 /locus\_tag="DMACINML\_00897"  
 /inference="ab initio prediction:Prodigal:2.6"  
 /inference="similar to AA sequence:RefSeq:SQE23472.1"  
 /note="Uncharacterized protein conserved in bacteria"  
 /codon\_start=1  
 /transl\_table=11  
 /product="hypothetical protein"  
 /protein\_id="Prokka:DMACINML\_00897"  
 /translation="MPNFNQNEQIKCPSGFSFIDISTALYAQILDKAKQEMLKQKKEF  
 EDEVNAKRAEYIKALNDLKAQKLEQEKLINQVVSQKLLLEKQKFEQELLIQRQNFQKE  
 FSEKFNKEHENEMKIMQEELEKKSKELTEFLSVKAENERLKRQKENEERLKFQAKEE  
 AFKEFKEQESKNLEFERDKMRLEFQKSTQEQLKYKELETNFKSVAQKLEDAQRRIEQ  
 GSQQQLQGEAAELLIEEYIQNEYIGDEVKEVPKGVNGADCLHIVKDSFGNICGSILYES  
 KRTKEFNKEWIDKLLDSIAAKSDIAVLITKMPKEKQKTHFKEGILICTFAEFKGVL  
 AVLRESIVNAYKLNALQNKDEKNHILYEYLSKEFNTQITFILKTYQNMKEELEAEK  
 RALQNIWKKRERAIENLSFNSTAIVSSLNAIFSDLQGGNLIGEEGLKSLLENLAKDED"

gene 156503..157699  
 /locus\_tag="DMACINML\_00898"

CDS 156503..157699  
 /locus\_tag="DMACINML\_00898"  
 /inference="ab initio prediction:Prodigal:2.6"  
 /inference="similar to AA sequence:RefSeq:EAQ71913.1"  
 /codon\_start=1  
 /transl\_table=11  
 /product="drug resistance transporter, Bcr/CflA family"  
 /protein\_id="Prokka:DMACINML\_00898"  
 /translation="MQKHTKIHGFSKLLKLIILALMSSIAPLSTDMYLPALSHVEQSF  
 HTSKALTQLSIASFFLAFALGQLIYGPLSDIFGRKIPALVGIFFIVSSLFCVIIDNI  
 YAFIALRFFEALGGCAGVVIARAIVNDLFEIKEAAGIFALMMVSSLAPMLSPTFGSF  
 LLEYFSWHSIFTTLFALGILLFLMILFGLKESAPHLKNNKFSHEEAMKSYKFLKDKR  
 FLTYVFCAALALAAMFAYITGSSVFVFTQFFGLSEQQFGILFGVNALGFVICANINARL  
 VRKFESEKILSKALIIMFVSTLILLINAFLYPNLFLFEASIFTSIAMLGFIAPNTTTL

AMARFKDHSGTASAVLGFIQFALAGLISSVVSALDANTPIILACVMCACVLIANGVYF  
 QAKRKA"

gene complement(157696..159174)  
 /locus\_tag="DMACINML\_00899"

CDS complement(157696..159174)  
 /locus\_tag="DMACINML\_00899"  
 /inference="ab initio prediction:Prodigal:2.6"  
 /inference="similar to AA sequence:RefSeq:ASI86604.1"  
 /codon\_start=1  
 /transl\_table=11  
 /product="membrane protein"  
 /protein\_id="Prokka:DMACINML\_00899"  
 /translation="MCKKTLNKDVRISLRQVRKEVLSEKLENEEKGLKKNIYKRI  
 IGYWENASKDINEDLLKTEVKKISYEMISRKILSKELQIEEKNI FVNSDTIYIRPRAH  
 YSVGEDMKDAIKRQLSERLPIKKNVIGLFTKFSLQFKQCDFKCRIGEEYYREPKHITV  
 IEVMYLEYKNLAFVNCNFFEEVFFTQKKFKLLTMENCHFYKAVYFSGVFNENTFFNS  
 SYFRDYINFYTCEFEKTACFYGVTFDKTPNFPQAIKGNINVVNTNLNFTFDDLQERI  
 KQYKDFNKAKEKKPLDKIANDFRDSFRNFKSTLIKDNLLDASNFKYELYCKELEL  
 KNKKNKTLKDKIDKWQLSFYHKLCDHHTDLLNLRWLVLVIGSFALLYFTSRVIQDIN  
 LLKVLNQYGVCLSI VGVFNLLCLYWFGCIKKFDFVYFNLI AVLWVICYKPKIIFGIV  
 NLIGDNSYNGFENVLITIYTILLALVLFSLQKTARKNSIVPS"

gene complement(159252..161162)  
 /locus\_tag="DMACINML\_00900"

CDS complement(159252..161162)  
 /locus\_tag="DMACINML\_00900"  
 /inference="ab initio prediction:Prodigal:2.6"  
 /inference="similar to AA sequence:RefSeq:CDH61872.1"  
 /codon\_start=1  
 /transl\_table=11  
 /product="Putative integral membrane protein"  
 /protein\_id="Prokka:DMACINML\_00900"  
 /translation="MMRKAFEKILNTLEKCCETHQNDKSEYEIKSEYEIRRQLFNIL  
 SKNNPNNIKEYDISIPSDEKTKETIKEIKGKEDFRQGDELFSDDKWLIRKATLDLS  
 SLCDNMNNIQYNAIAQCNIIFSECNISLSDKQSENNRIVKTNLYFYNCTFEKALIKLE  
 NIIFEKTLTFNQCAFYNDLEIYQNQFLDHLVFINCSNEQNDKKIISLDLQDNEFKGYL  
 FIKNCTIKNISLWKNKFKNRCYFVDSKFGYKDKDNQVKLNFSNAHFEEVYFNSEFY  
 NYADFHECKFDNIACFYGVKFKAPNFSQVVLKGNLNLNITSNMFVDDLEKQIDQEY  
 EDFNKDKKEQDKKPLYKFSNDFRDSFRFTFKNALIKDNLLDASNFKCELYCKELELK  
 NKKATTFKDIVDRYQLFFYRKLCDHHTDLLKAFHLLIVIMLFGMFSFVFDKFKQPSH  
 IENDIKYNIKVDSNENYIFKEHNKTTYNLLSLNIEKEIQDLDISKFCFTFTLGLLFA  
 VVILSNANCLWFLFLLLLEVIVFYIGLPKSI FSHLLIILSFVCLFVFI LVLDDDEFERF  
 LFVSI SYAVCIFILLAKPSLLLPIFGSFLDKDSNTTYPLLFSLSVVYFILVVLVLFSL  
 QKTARKNSIVPS"

gene complement(161180..162841)  
 /locus\_tag="DMACINML\_00901"

CDS complement(161180..162841)  
 /locus\_tag="DMACINML\_00901"  
 /inference="ab initio prediction:Prodigal:2.6"  
 /inference="similar to AA sequence:RefSeq:AFU42170.1"  
 /codon\_start=1  
 /transl\_table=11  
 /product="Putative integral membrane protein"  
 /protein\_id="Prokka:DMACINML\_00901"  
 /translation="MDSEILTLSQDEIENIKKELCRILGYRCKDKIEVINEVNINNF

```

FAHDKKKHKNLFIISNKEKNLLDLEIDLKMSLADMDYQIKFEGYTIKFTDSFSKEK
IKIGQNL YFNCDFKVIELKNICFKNFEIDGCRYESEQKKPIVFRACEFKELSLNNSI
FSESIKFEETKIKYLDINLSEFKKYFFMQNCIIENISLWKNKFKDRCYFVDSKFGYK
DKVNKAELNFSNAHFENNAYFNNSEFYNYADFHECEFEKIACFYGVKFDKTPNFSQAI
FKGNLNVVNTNLNFTFDNLEEKIKQEYGSYKSQRIAKEVGVIPNLYQEKSLDKFANDF
RDSFRNFKSTLIKDNLLDASNHFHYELYCKELELKNKKDKTLKDRIDKWQLSFYRKL
CDHHTDILQSLNSLILVIGIFVISSVMVASFNRYLGYKPILEHWYFSLDFYNHHINS
IIQDNYLFVVKVNFAMLFYGLGLVGFALCLKYIREFFIIISYGVTLVLA VSPKILIP
AMGIFTDKRSMLDPLSTIGGIYIVFGFVVSFIKTIRKNSIVPS"
gene      complement(162881..164551)
          /locus_tag="DMACINML_00902"
CDS       complement(162881..164551)
          /locus_tag="DMACINML_00902"
          /inference="ab initio prediction:Prodigal:2.6"
          /inference="similar to AA sequence:RefSeq:CKG55942.1"
          /codon_start=1
          /transl_table=11
          /product="KAP family protein"
          /protein_id="Prokka:DMACINML_00902"
          /translation="MEYKQQIKNFLEDEENYSLLISGSWGVGKTYLWKEIENEINPKI
IHKENLWKKFKSNINFLNHLIILFSIIKQCVGITLISITEYFNLCNYIKNPKNQVKNI
VYVSLFGKEHYKEVLEEITLKAYKHNKILYFIRNITFWKLSVGTFLQLFITKNFKNII
VCLDDLERKSDKLDIKDILGLINQLKEEKCKVILISNKDELSNNKEKDKEIFDITYKEK
CIDLNIHIRSKTEVVSQILKEKNPEISKEIIPDSIYQIENLRNLNKIIKALEFFNKEL
QLADRLEQNKEYKAFFIEISKKIILEYENMDSYNLNEEKQQGIPLPRIFLKTINSIIK
DYTNNGLIYSIPNDKKEDFEKELKEYRFYSGLFALRKLLED SIQYPNGTNNKLEIFF
NSVDEKQLDDFVYELGFINFIALDRVHFHFDKNERNLKMKKYCLELAKDCKYDEKFINI
ICNGDEALKQYYEGLEIKEITIKQNNFSKKIQKIQDKYKYIKSYSDFYAHLEKINKSS
EEEIRDFLNNEMIFS YCDIYFSIKEANKSNYPRLYSVYKSFEDKKS"
gene      complement(164551..164667)
          /locus_tag="DMACINML_00903"
CDS       complement(164551..164667)
          /locus_tag="DMACINML_00903"
          /inference="ab initio prediction:Prodigal:2.6"
          /inference="similar to AA sequence:RefSeq:ADT71802.1"
          /codon_start=1
          /transl_table=11
          /product="type II restriction-modification enzyme"
          /protein_id="Prokka:DMACINML_00903"
          /translation="MKIYSKTLKAKDNENKINSLVYKLYNLTEDEIKIIESK"
gene      complement(164686..165789)
          /locus_tag="DMACINML_00904"
CDS       complement(164686..165789)
          /locus_tag="DMACINML_00904"
          /inference="ab initio prediction:Prodigal:2.6"
          /inference="similar to AA sequence:RefSeq:AFU42170.1"
          /codon_start=1
          /transl_table=11
          /product="Putative integral membrane protein"
          /protein_id="Prokka:DMACINML_00904"
          /translation="MAFDLVLKARISFLFSIFKDEALFFNINPNNCIFHNVEFNKIN
FIHNDINVESYAESYVFQNAIFKDTLSFEGMEFERLRFDNVLFNGVVTFSNTKLNKTK
PQFINCTFSNQFNIEHQYIKYSDKDIENKINNIQDKNDKFRALLNLRDLFRKLSNRI
AHHNLIDASELRTQELYARELELKYKEKSLREKIERWQLSFYHKLCDHHTDILQSLN

```

SLILVIGIFVLSSVAMVAIFNYRLGYKPILEHWYFSLDFYNHHINSIIQDNYLFVVKV  
NFAMLFGYLILVGFALCLKYIREFFIIISYAITLLVLVWSPKILIPAMGFFTDKRAML  
DPLSTMGGIYTIVFGFVVSFIKTIRKNSIVPS"

ORIGIN

1 gctattatctt ctaataactgt aagtgatata gctaataata tacttgaaga tgtgaaaag  
61 aaaaggtttt aattagagac tgatatataa aatttagatt gatatgagat tatcaatcta  
121 aagattttga tttggttgta cttttagttg attactcgtt gatatctttt aattcattat  
181 tcattaacac ctaggtagat tgggttggtt tttatatagt tctttgtttg atgatttatt  
241 ctatattttt tgatattatt gcttttatgg attagttgag tatctattga atttatttct  
301 catttagctt aaaataaatc gccttttttg attaaattcc ttgcttaact tcatttgtct  
361 actctaaaaa ttactcactt tataaattac ttaaacagct aacatacact atataacttt  
421 ttgcttggtt gtaaatttat gcatatttat acttaaaatt ttaaactaac atagaaagga  
481 tctatataag aaataaaaag gtttttacia aaaaatatag tgggaattttt aaaaaataaa  
541 atatgatttt gggtttttatt gcgatgattt aaaaaattca agccatacta tacaattaaa  
601 acaaaaacta tttcaataca tatagaaaat caaattaagc ttattgggct aaaatttgat  
661 ttttatctcg acataaatth tgccagttag aagtagtttt aagctctaaa cactgcttta  
721 gactttcttt ttgagcctga gtattttgca ttctttcata agtcatactt tgtatatata  
781 aagctctagc cctatcttca tctgaaagct ttaattttaa caaatctatt aatactgcta  
841 aagattcttc attttgattg gttttggcta aggtatcaag atagataaac tctaaatttg  
901 gactaaaaag attgattcct tttaggtttt gatagtcaat agccttaggt gcataattta  
961 aaatcgttgt ttgcatattg tgatcgtttg cgtaaattaa taaattatca taagcttcaa  
1021 ccattgtaaa attcatagga aagctctcta aaatttgtaa aattttgata gccatattat  
1081 aatcatccat tttcaataaa gacaaaaatt gcaataata agctttaaaa ttctctcat  
1141 cactctttta aattctagaa tttgctattt ctgagctat atttaaagct aatggatatt  
1201 gtttattatc ataaagtata gatgcttttt gcaaacata aaaaatagaa tcttcattat  
1261 gatttttatc gatataatcc attgcttggt gcatatttga agttcttata agacaagcta  
1321 gcatttggtt tttattttct atcttttgct caatttcata ggaattaaat tgtgtaaata  
1381 tattaacagc attgatacaa ttatcggctt ttaagtcatt atttagaagc tgagtagctg  
1441 cttgctctaa caactttgta gaatttggtt atttcttatt ttctatctga tctttatagg  
1501 ctaacactgc gcttaatta cctctttat aataaagcgc gacatcctca tctaaggctt  
1561 tatttgctat attttcatct ttttgagcat attctttcat taaatttgca taacgctgat  
1621 gcaaaaatgt agcattatta tccgctaaag caaagaaaac ctcatcattt gcttttctaa  
1681 tttcatctaa atattttcca tctaaataat tatccatata caaatcaaga tattttttag  
1741 catcacttga tcttgaagtc atagctaag ttaaagcaag atcctttaaa acttgctcat  
1801 atctactatc aatttttaggc atttttaaaa aaacatcttc gtaaataactt gcacttatgt  
1861 catattggtt gtgctgatta aaaagtttag caagctcaa agatctaac atatccttg  
1921 gaaaatattc aggattagcc tttaaaattg tattgacata ttgcacagct ttatcgattt  
1981 gattgtagc aagataatct ttgattaaac tcatcgtgc tcttgctgct aaatctaaat  
2041 ttttagtatt aaaataaata tcctcataaa tatctatagc tctttctttc tcatthaaag  
2101 gatagatata atcagcataa tcaagtcttg ctgagctgag aaaataacta ttgggttggt  
2161 cgttatttaa aatcgacata atatatctta tatcagcag ctgcgataag gcgatatagg  
2221 ttcttagcat aatagcaag acttctggaa aattcttatc acttgtaaaa gtacgattcc  
2281 aatttttagc ctcatcaatc attttttcca aaacttgctg atcacgcata cttggatctt  
2341 gagtgtaaatt ttgactttgt gctctaagct tataaagtat aaactcattc ataaaaatac  
2401 taccacgata acgattgatg gcattttgag catctgtaat cacttgagta tagttggcct  
2461 tatcactatc attttttata cgcaataaag tattgatatc ggcactttga gggataatta  
2521 caggatctga atthaaatcc aaagctcaa cataaggcaa gctttcatgc gggaaattga  
2581 tattaanaatc aagtccatca taatctttta catgctctaa ttctggagta aaaaataaag  
2641 taaaactctt acttttatgc atacttgaag aatttagctc tttatccgca taaatatttt  
2701 gcgatagatc aaacattctt gcgcttattt taggtataat aatcattttt atcttttgag  
2761 gctctttaat aaattttaaa tcaaaagcag taaagcttg atcacttagt ttattatcca  
2821 ctatacccat aatctcgcat tcaaaatgca ttttatcttc aataataatt ttttgacaag  
2881 taaaatctaa gtcattacta gcatgtaaga ccgcaaaagc ttgattgttc tgcggcctg  
2941 tatttagggc taattcaaaa gaaaaaagag tgcaaatact cagcaatacc aaaaataaa

3001 ttttcataca ataattatat tatatttttaa gtaacaaaaa taaagcaaac aactaatca  
3061 aagtgcaaag agctaaaata aaactctgaa taaaatttaa atgctctgaa acttttagctt  
3121 gagtttttat aaataaagca tggataatta acttcaaata agcataaagc ataagaagtg  
3181 atgccaaagc cataaaaaga gctaaatacc aataatcagc gacaattaaa gtttttaaca  
3241 ccatcacctt gccccaaaaa gcaccaaagc gaggaattcc agctaataagc agcacacaaa  
3301 aactaagcga taatgcaatc aaaggctttt taagcaataa agcattaaat tcttcaaagc  
3361 agcttccctt aaaggtacta agaatcaaaa atacaccata attagcaaag ccaaaaagca  
3421 cccaataaac aaatatagaa tttaaaacat catcagccgc atttaacaaa ggaatacatg  
3481 ctgctaaaac aaaactagaa tgcactatag aactataagc aaacattttt ttgacatctt  
3541 tttggctcaa tgcggctaaa gctgcaataa gcattgaaaa tactgccaat acatttataa  
3601 tattttcaaa tcctaaatga tttaaaagc taaaagtctt gataactaca acaaacattg  
3661 ctatttttgg gacaacagaa ataaaagcaa ctaaatttac atgctgctgaa gaatacacat  
3721 cttttaacca aaaatgaaaa ggagctaaag aaagtttgat ggcacataaa acaaaaatca  
3781 taactcctgc tcctaaaagc ataggatctt tatcaagagc caattttaag cccaaatcca  
3841 aagtacctgt tctaataata atcaaagctg atgccataac aaaaaagccc gaaccactg  
3901 ccgcaacgct aaagtattta atagcacttg aaatagcatt attgcttcca cgcatagcaa  
3961 taagtgtata aagagccaag gaagagcttt caagtcctat gaaaatcaag atcaaatttg  
4021 agcttgaaac cataagcaaa agccccgcta ccataaataa aaacagacta taaaattcgc  
4081 cttgattttc ttctttttgc atcaaaagat acaaaaatga aaagcacaaa ataaccaag  
4141 aagcatacaa agaacaataa tcattattta gagttcctaa aaatcctttt gcttctaagc  
4201 cttgctgagc gatattattt aaaattaaaa aaacactcac aatcaaagat aaagagctag  
4261 tagccatata aaaagtctga tgaaatttcc aaaaaccgca acaaagtaaa agcacgatag  
4321 ccacagcaat caaaaatgca aaaggatagg ataaagggat atttaagctg cttaaatcga  
4381 tattacctaa cattattttc cccttctaaa tgatttataa atcgaatggt ttgatcatca  
4441 atagctcttt ctttcatttt ttcaacaatg aaatctgcat ctttatttaa aggatctaaa  
4501 aaaatctttg gtgctatacc caaataaaaa atcaaaaacca ctataggtat caaagaaaga  
4561 atttctcttg catgcaagga gcaagtttca agctgacttt ctttttgcatt aaaaaacatt  
4621 tttctaaata cataaagcat ataaatagca ctaaaaatga tcacaagtcc tgccaaaaga  
4681 gcataaagta aattaagttt tgcaacacct aaaagaatta aaaactctcc aataaaagat  
4741 agtgtaagtg gcaaagatat acttgcaagc aaaatcaaag taaagaaaat agtaataaaa  
4801 ggtgctttac tagctaaaga atgataataa gaaatttcaa gtgtgccata ttttttatat  
4861 aaaagctcag ccattaataa caaagctccc gtaacaatac catgtgcaaa catataaaat  
4921 accgctccac taagcccaa agcattaaaa gaaaaaatac ctaaaatcat aaccccaagg  
4981 tgagaaatcg aactataagc gatcaattct tttaaatttg aagcgcggtg agcgattaag  
5041 gcattataaa ttatacttac tatacacaaa gctacaacta aaggcataaa atacacactc  
5101 gcatcaggga aaagtggcaa gcaaaagcgt aaaaatccaa aaggagccat tttaaatgct  
5161 acaagcatca tagaaactaa aataggtgaa tttgcataaa cttttggcgc ccaagtatga  
5221 aaagggaaaa gtggtgcttt aatagcaaaag gcaacaaaaa atgctccaaa aagtaaaatt  
5281 tgttcgttaa aactcatagc cgaagcgtta tttttccaaa tttctatatac aaaagtgaag  
5341 atatttaaaa gttttaggtt cgcataggct tgataaatta aagccaaaag cattaaaata  
5401 gaaccgcaa aggcataaac aaaaaattta atccccgctc tataatcttt accatatacc  
5461 cccataatat aaagcaaagg taaaagtga aattcccaaa atacataaaa aagtaacca  
5521 tcaagcgaag aaaataatcc cataatcgca aattctaaaa agaataatgca agacaccatt  
5581 gctttttggt caatctttta aaataaaaaa cttaaaaata tcatcaaaga gcttaaaagc  
5641 attaaaatca aagctatact atcagcgcct atatgataac tcatgaaatt tactacctta  
5701 aaaggaagtt gatattcaag gtttattcca tttaaataat cttgccaat cttgatattt  
5761 aaaccagca ccattaagct cgctatgagc ctaaaaactt ttataaccac acgatttaaa  
5821 acaagagtta caaaagcggc aattaaagga aaaaagatta gataatttaa cattttacac  
5881 caccataacc aaaataagca aatcacaaa tcctgccacc aaaaatctaa gcatcaaatt  
5941 aagactattt gtcataatta ttttttgcga aatcaaatta caataataag caattttctc  
6001 cactatagca tcaaaaatat aagtatcaca atgtttttaa accgcacaca agctttcgta  
6061 ttttgaaact ataaattcat gataaaactt aggaataaaa taatcattgc tcaaaagctt  
6121 atggatttta ttttgctcta tgctatcttt aaaccaagaa gccttataag ctataatagc  
6181 taaaactaca ccaaaaacag ctgctacact cgcacaaatc attacaagtt tgttttgagc

6241 atcgataaaa ataagttgag tgctaagata ttcaaaaaaa ctatgctcaa acaagcccg  
6301 aataatagct aaaaccacca aaggactcat agccaaaaga gctatTTTTac ttgcttcatg  
6361 tggatgttta tcatgtctag aaggagtga aaataccaac attaaaagtc taaaactata  
6421 aaaagcagtt aaaaaggctg agattaaaag aattaagaaa attccatgat aatgagcgat  
6481 aaaagaataa cccaaaatca aatctTTTTga gaaaaagcct gctaaaggat aaattcctgc  
6541 taaagccaaa gaacctatag tcataaaaaat agcagtgatt tttaaagatt taaaaagccc  
6601 accctTTTTt ttaatatcta gttgatcatc cattgcatgc ataacatttc cagcacctaa  
6661 aaagagtaaa gatttgaaaa aagcatgggt tactaagtga aataaagcta taccataagc  
6721 tccaagtcct gcagccacaa acatatatcc aagctgcatg aaagtagaat aagcaataat  
6781 gcgTTTTtaa tccctagcca ccaaagccat ggaagctgca aaaatagcca caaatgctcc  
6841 cagcaaagca ataaaaataag aaacctcagg cactaaagaa taaattttct ctgcacgaat  
6901 aaccaataaa acccccgcag ttacatgggt agcagcatgg attaaggctg aaacaggtgt  
6961 aggtcctgcc attgcatctg caagccaagt atgaagagga aattgtgctg attttcccat  
7021 agctccgata aataaacaac tcgcaatcaa aaccaaagca ttatgatcta aattttgctg  
7081 tatggcaaat acttcattgt attttaaagt acctgcttgg atataaagcc aaaaaattcc  
7141 taaaagcata cccaaatccg caatacgatt catgataaaa gcttcattag ctgcaaaaga  
7201 ataagtatta tttttatacc aaaaaccgat taaaagccaa gagcaaagcc ctactccttc  
7261 ccagcctaca aaaagtccta aaaaattatc actcattact aaaaaagca ttgaaaatac  
7321 aaaaagacct aaataagcga aaaatttatt aaaatcttta tcgtgagcca tataaaaaat  
7381 actataaaaa tgcacacaag ttgctacaac acccacaaca ctcatcatag taagagaaat  
7441 agcgtctatg ttaaatccaa agcttaaac tataaaccac tcaaataaac ttacattaaa  
7501 agcttgattg ttaaaaagta gatacaaaaga acaaaatgca cttataccga tcaataaaga  
7561 acatatataa gcgacaaaaa tttttctttc acttaaagca aaacaacttg caaataaaaa  
7621 agctacaaaa gggctaaaaa gagaaatcaa agctaaattt tgcattatca aacctcctct  
7681 tttaggctct ttaattctaa agtgcctttt cttctatacc aaagcacaca aatgccaca  
7741 cccacagcca cttcacaagc agccacacc atcacaaaa gagcaaaaac ttgtccattt  
7801 aaatcctgat gcatcttaga agctgcgaca agagccaaat ttgctgcatt gagtaaaatt  
7861 tcaactgaaa taaagagcat gatgagattt tgtcttttta aaataccgat taatcctata  
7921 ataaacattg caatagctat aaaaaaatac ttttctacca ttatctttcc tttgtaagct  
7981 ctttatgtgt aagcacgatc gcacaaatta aagcgattaa aagcaaaata gctataaatt  
8041 caaaagctaa aagatatttt gaaaaaatag caaaagcaag ttgcttatta taatcgaata  
8101 aatttgatc acttaaagcc aaatcactcg cgatattttg gtgcttaaag cccaaaagca  
8161 taaataaaaag taaaacggca cttaaaatta caaaagaaa aaaacttttc ttagctctta  
8221 atttttcttt gaattctttg gaattgtcaa aaaacatcat agcaaagcta taaagcccaa  
8281 gcacagcccc gctataaaact ataattttgta tcactcctaa aaactctgca tcaagtaaaa  
8341 aataaaaacc cgataaaaaa accattccac ccgctaaagc agaaagagaa taaagcatag  
8401 ttttactcaa aactgctacc aagaaaaagc ctaaaaccac tacactaaaa aatgtaaaag  
8461 ctaaaatttc tatcatttaa cttctccttg tggagctaaa tttggcaatg cacattcttc  
8521 atcgggtgat aaattttttt ctctttcttg taaaacttca taataatttg gagttttttt  
8581 cacaagtaaa tccgcatcct ttctaagact acccgcccc tcaaattcaa cttgatTTTT  
8641 aagcttatca ataggggtta aaaaatcttg cttatagcca aaataagatc tttgttcagc  
8701 tgcattttca tattctgtac catggactat agcaagttct ggacaaactt cagcacaaaa  
8761 accacaataa atacaacgcc ccaaattaat actataattt cccacctttt tacgagcatt  
8821 ttcatctaaa gaagtttcca tcctaataca attactgata caaatctttt cacaaagccc  
8881 gcatcctata catctttcat tttcactttc tataaaacgc ataagacggt gtacggcacg  
8941 gtaacggttg tcaagcttta ctttttcaaa gggatatttt atggttgcac tattatttct  
9001 ttttagcatt tcacgcataa ccaccacaa tcccacaaaa agctctaatt tcacatttct  
9061 ttttaaagct tgtgaaatct tctgccaagt gctagtagga gtctttcttt tttcatcgat  
9121 taaataataa ttttcatca caaactccta tataagtact gcaaaggcag taattaaaag  
9181 atttaaaacc gccaaaggaa ttaaaattaa ataacacatt ctcatcactt gatcagggcg  
9241 aagttgtgga aaagctgctc tagcccaaaa ataccaaaag aagataaaac ttgattttac  
9301 tatcatcata atccagccag gtataaaata aaagtcatta aaaccgcta aaaataaaag  
9361 cgtgatcaaa atcgctcctg ctatcataga ggcatattct cctataaaaa acatacccca  
9421 tcttaaacc gaatactccg taccataacc cgcaacaatg tcagcttcat tttcagttaa

9481 acaaagtgga gttctattgg tttcgataaa taaagcaatc acaaaaagcg caaaagctaa  
9541 aggctgttta aaaataagcc atgaaaaaaa tccatcactt tgataattat taatatctat  
9601 caaagaaaaa gatcctacaa gcataacaat agctattaaa gcaagagctc ctacactctc  
9661 ataagaaatg atggctacaa gccctcttgc agcacctatg attgaccatt tgttattgct  
9721 tgcaagccca ctaaaaaata tagcataaaa acaaagcccc gaagttccta taacaaaaag  
9781 caaagccaca ttaatatcgg caatcaaagg ctgtatagtg cgaccaata atgtaaattc  
9841 aggaagcata ggaatagccg ctaaagatac aaaagcacia atggccgca tcaaaggcgc  
9901 tatagcaaaa atcaatTTTT gagaatttga aggtatgata tcttctttag taaaaagttt  
9961 tatcatatct gctacaagct gaataagtcc aaaaggctct accatatcag gtccgatgcg  
10021 tctttgaaaa taagccaaaa ctttctttc tgcataagtt gcaagtcctg ctaaggtagc  
10081 aaaaattgca atcactataa tacacttaat taaagcctct aaagcaaaaa aagcaaaatc  
10141 actcatgact cgctccta at ttttctaaat ttgccacaat aaatctttca tcaaaaaaac  
10201 ttagcgtgtc gatTTTTTca tcaaaataag gtaaaaaagc cccatTTTTt atgtctttat  
10261 ctatacgcac actaagactt aattccttat ctttgatctt aagttttaca agatctttat  
10321 cttgtaagtt ttttctttt gccaaattct gactaaccct taaaaaaatc acttcgttga  
10381 ttgcacttgc acgatttgaa aatctaccaa attgataact aggatttgca ctgtaaagca  
10441 aaatttcatc ttcttgtaag gttaaatttt gcaaatgagg agctacaaat tcattcttag  
10501 cgcttttttt acagcattct aaattttaa ataccctct tttgcattct ccaccgttgg  
10561 tataaaaaatt atcaagacta tcaaattcca aaggagaaaa acctttgtta ataggaagtc  
10621 ttttgggtgta attgatcgta tactcctcat caaacctaa agcattagct aaatcattta  
10681 aaaagtatcc atcaaattct aaagctgcat tggttggaac tactttttta tcataattta  
10741 aaaaagtacc ctcttgctga tttaaacttg agctagctaa attagcatgt tcttcataag  
10801 aaaagctaaa atctcctctt tcattataac ccaaagtctt accttcttgc atactctcat  
10861 ctaaatacaca aatcatagca acgcctaagg tatttgtatg tgtaggattt aaaaagactt  
10921 taaaaggagt tgtattttgg atcaaagcta gtaatttggc taatttttta gcattcttgt  
10981 gaaaataaaa atcacttctt ataatacaag taaaattagc ctttttaagc aataaatctt  
11041 ctaatttatc ctcatctata ccaaattttt tagcaaaaa acgagcgtttt acttctatgg  
11101 tttttttcac ttttttaggc acaacttttt ttacttcttt agaaatttca ttgccttctt  
11161 catctttttc tacaacttgc tctataattt cttcattaat actttcttct atttctttat  
11221 tttcatttat aaaaaattca gccaaatttg cttttatatt ttcatttga ctgaattttt  
11281 gaagcaagaa atataaaaatt tgttcctcat ctccgctttt gtgagtatgt gaaatgaaat  
11341 ttttagaata ctttgcaatg cctgcatctt ctatagggtg aaaataaagt cctgagcctt  
11401 tattcatcac taaggcattg ttgattttat agctaagcgt aggcgcacg tatcttaaaa  
11461 gcgttcctgc aacgactaag aaatcgcttt ttgtgatatc ttgagttgta gcattataaa  
11521 actcaccgct attgcttata aattcttcca aaaagtcttt aaattttaaa gcttcgttat  
11581 tgataagatt taagccaaat ttctttttga aattttgtaa aatcaaagct tcttcgttgg  
11641 taataaagct attaaattta atatttttaa tctcattttt ttcaaaaagt tctataagct  
11701 ctttaaaagc tttttcatcc ttacttgcct cattttgtgt atcaaaaagca aatcttgcag  
11761 cttattttaa actcgcaaaa gaaaaatcat tgcttacgcg gtaaaatttt ggtttttggat  
11821 tgctaagcc gctttgtttg atatcataat acataagctc acaatcactt gaatgtggat  
11881 ttgaagcagg aattctttta agctcccaa tattagaagt atattgaaat ttagagccta  
11941 tcaaagctcc tgttggacat aacttagtac actctccaca aaaagaacaa tcaagcgtat  
12001 ctccgtttgc agggcctatc aaactttttt gaaatttctg ccaaactgca taagcgtctt  
12061 taccatact ttcttttaaa ctattatcta cactatcgcc tccacgaggt actgttttta  
12121 aagcactctc gccgatttta tccttgcaaa ctgtgataca acgctcacat actatacaaa  
12181 gtgcaggatc gtaattgatc attcccaat gtttatgctg tttatgctga tctttaatcc  
12241 aatgtctttg gatatttaca cggcttttgt gggtgaaatt ttgcaattca cattcgcctg  
12301 atttatcaca aaccacat tctaaaggat ggttaataca ataagcttgc atgatttcat  
12361 ttctttcatc ccaaagattt tgcaaatcac tttctacaac cataccttct tttgctttag  
12421 tattgcaaga atacactttt ttaccatcag cctctacat gcacatacga caagccaaag  
12481 tcggactaca gcctgaaaga tagcaaattg ctgggataaa aatatcattt cttcttgcta  
12541 tatttaaaat atattcgcct tcttcaaagg cgcaatctat gccatttatt ttaattgtca  
12601 ttttgcttcc tttatgcaaa ttggagtaaa atcaaaacct tgatgatcgt aatttaaaaa  
12661 ggctatagtg cttgcaaat tttcatccaa acaaagtgtg gttttaaagc taaaatcttt



12721 agccaaaact tcaacttcac ttttatcttt acatthttgca atthtgcaaaa atthgcttaga  
12781 acaatgtaaa ttatcatctt ttaaathttgc tctaaaaagc accaagccat cataactatc  
12841 aagctcttgt aagg tactca atthttgtatt tttaaaatca cattctthttt cactactatc  
12901 taaaathttta agthttgtatt tttggcttag aaaathttaga aathathttga tathtttact  
12961 gtctthttaa aaattaatat tttcatctac aattaagtat tttgcathtt ctaaaaaatc  
13021 taaaathttca ctgcctctt cttgcctaaa acaagattct gcactcaaat atccctcatc  
13081 taagtcttga aaattatcca tttcgctcat cttgcaaagc aaagctaaaa cataactcaa  
13141 actcgcaatt tcacathttat aaaathttcgc atthtaattc ttatcttcaa ggcaagaaat  
13201 ataaatathtt tcaccttgaa tthtttcaca taaaathttta tthtttaagac ttagcatatc  
13261 cacaaaaca agcgtcttht cgtaaactcat acgctthtct tthttaatcac tatagtccaa  
13321 tccacttgat taaathttcaa ggaathttaaa agctcgcagc cttgctcttht aacaaaagag  
13381 aagctthttct ctacgggtga aaagtcaccg atthtcaaaaa gcaccaccaa aacttctctt  
13441 tthttgagctt cthttatgat ttgtgctaaa tcttcaaaaa gctctthtact cthttcttaa  
13501 tccactctt ccatcgatct atctcaccta aaactatatt tacathttcc ataatggcca  
13561 caacatcagc caaataagtc cccacaagca tthcttcaaa aatgcacaa tgccaataac  
13621 taggcgttct agcctthttaa cgataaggcc tthccgtacc atcactatgg ataaaaaatc  
13681 caagctcgcc cttaggactt tcagttggca cataaacttc accctthtga ggtthttaa  
13741 cttgagttat aagcacaata tgctgcatta aagaataatt ttgcgttaa atthtgcctt  
13801 ttgaactgct gacatattca ggatgattgg ccaathttc aggcggagta tctthttaa  
13861 gcgcggcaca ttgtctaagt atthttaaagc tthtcgcaaa tctthgcata taaacttht  
13921 atctagcata agaathctct tgagttgcat aaggcacgcc aaagctatt tcattataaa  
13981 gtaaataagg ctcttcttgc cgtatcat atcttacacc acttctctt aacatcacc  
14041 ctgtacagcc ccaathctc gcctgttctt tgcttacaac acctacatht tcagttctta  
14101 ggcgcaaat tctattatca tctaataaag ctctcataat agcgatatt ttaggaaat  
14161 tatcgcaaaa tgccaaaagc tctthttaa aacttccagg caaatcaagc ataaccctgc  
14221 ctathtctat agaagaatgt gtaagcttgc cccacaata tthttctatc aathcaaaa  
14281 catactcgcg thctctaaag caatacaaaa atacactcat cgcaccaata tcaagcgcgt  
14341 gagttgcaag ccaagcaaa tgcgatgcaa tgcgattaag ctctaaaagt atcathctta  
14401 tcaactgctgc acggcgtgga atthtctaaac cacaagctt tcaacggct gcgcaataag  
14461 cataathatt agccgaagca gcatataat ccatctatc agttgtcggg ataaactctt  
14521 gatatactat atthttcagcc atthtttcca taccacgatg catatagcct atggtagggc  
14581 gcgctthttac aactgctct ccatcaagtt ctaaaataag gcgtaathtt ccatgcgctg  
14641 aagggtgttg tggcctaaa ttgatgatca tthttgagtc tctthtgcata aaagctatat  
14701 tthcataata aggtthttaa ttgctaggaa tthtgcatht aacgccttht gtctaaaath  
14761 tthgcttctg cgcgtthtgc tthttttaca aaagcaagc ctccathttc ttggtattct  
14821 tthttaaaag atacctctth tctagatccg cthtttggt cthcatgata caathttgca  
14881 aathtgagtg tathtttatc atctgcaaaa cctggatctc tthtctcagc tctacgatt  
14941 tgcgggtatt cthttacaaa aathtttatc atthtatacc actgcgcgaa thcatctct  
15001 thcaaaggat aggtthttta aagaggatgg ccataccaat catcaggcat taaaatagc  
15061 thtaathtag gatgathttat gataaaaath ccaacatat cataathttc tctthtgcct  
15121 caathttgac cthtaaaaat atgcgctacg cthttgtaagc gthttthttac acccaaaaa  
15181 gthtcaaac gtacccttaa tctthtttct aathttaaa gctggtaaaa tacttcaaaa  
15241 ccathtttat cggctacaaa atcaatagca cthgtctctg taaaathttaa ataccctaag  
15301 gthtgaagca tthttagggt thtaacattg tcttctthtt taathttctat cacccaaaaa  
15361 tcaagttcta taaaagaath tacaatatca acttctgtht ttaaacctc ataatcttg  
15421 thaaatacac thctattaac atctaattht tgagtatggg gtgcatgata aathctgtct  
15481 thataataat tthtgcagtt ggcatthttt thtctgctat atthttctat cacaccaacc  
15541 tthttggagc cathttgcga ctggctthtt cthttcgat tthtttctgc aaaatcatta  
15601 aagcaactg aaaactthca ggcgcggag cacagcctgg cacataaata tcaactggaa  
15661 tgatctgtc tacacctga acagtagaat aagtatthaa catacccct gthattgac  
15721 agcttcccat agaaatcacc cathttaggat caggcathtt atcgtatagc cthttgttaa  
15781 atcagcgtg thtcttcatc aaagctcctg cgatgatcat cacttcta tgacgcggag  
15841 aagctctaaa aatcgttcca aatctatcaa aatcatatct tgatcccct gctgcatca  
15901 tctcaatcgc gcaacaggcg agtccgtagg ataaagccca caaagaatta cthtctcccc

15961 attgaacaag cttatctacg cttgttaaaa ccaactggcaa accactggca taatctactt  
16021 gatgctctgc catgcaaacg ctcctttttt ataagcatat aaaaatccaa cccctaaaag  
16081 taaaataaaa acaataactt ctaaaagccc aaaccatcct aaatctttaa aaatcaaagc  
16141 ccaaggaaat aaaaacacca cttctatata taaaagaata aaaatcaaag ctacgatgaa  
16201 gaattgggaa ttaatcttat tagcttgttt tactggaatt ggaccacatt cataaattcc  
16261 aagtcctagt tttttacgat tttttgcagc aaaattatta ccgatttttag aagctaaaaa  
16321 aaccaatcca aaaaaataa cactagctag cactaacatt aaaaatatac cgaaataggg  
16381 atgcgaagca tcaatgtggg acattttttc tccttttttt aaacactttg aatcacttca  
16441 caacaaaaat taaaatttac actctgttct attttactct aaactttcta tattgaaact  
16501 taataagaat aaatattggt taaagtttca tttttttaca cttaaagtta acaaaaaact  
16561 catcttgatg agtgataaaa atataagaaa tcaaattttc ttgctgataa tgatgataaa  
16621 aatttaagat ttcttttgaa ttttttatat caagactgga agtaatttca tctaaaaata  
16681 gcaatcttgg ctctaagatc aaagcacgga taagtcctac cggagcagcc tctcctccac  
16741 ttaactcata ggggtttttgt tctaaaattt gtttttttaa attaaagcaa tcaaaaaatt  
16801 ttaaaatctt ttcttgctct ttttttatat tgaaattttc tagaccatct tggataagat  
16861 ttttgatttt tttatagggg ttttaaggctg ctttttgatc ctgaaaacaa tactgaattt  
16921 cttttcttaa aagtctttgt tttgttttat cgagcttatg gggattttaa tttttatata  
16981 taacttcacc aaaacttggg ttttctaaaa aacaaagtat cctagctaaa gtgctttttc  
17041 ctgcgccact ttgccccaaa atcatcaaat tttcattctc ttttaaagaa aaattgacat  
17101 tttcaaaaat caaatgtttt tcttttttta aataccaatg ttttttaagc tcataaaaatt  
17161 tacctaaatt tttaacttca agcatgataa atccttaaaa attcatctgc tttaaaaagc  
17221 tgtgcttgat ttttttctaa aaaaagcacc tcatctgcta aagaattgac taaattttaa  
17281 tcatgcgtga tacaactaa gcctaaagta ttttttaact cttttaatat ttgaatgatt  
17341 ttttgcatat tttctttatc taaagaagct gtaatctcat cacaaattaa aatttgaggc  
17401 ttgctcaata aagctagagc caaactcact cttcttgcca taccctaaact taactcattt  
17461 gcataagaat gccacaataa atctatatca tcaaagccta atttttcaag taagtcaaaa  
17521 gcataatctt tatagtcttt ttgatattaat ttcgtatgag tttttaaaat aagatgaaat  
17581 aaatttccta tatccaaata cggataaaga ctaagctctg catcttgtaa aacaagtccg  
17641 actttagaac gaaatgcacg aagctcgttt tgattttaaatt ttagaacaga aacttcatta  
17701 aagctccatt catctgcgtt gatttcaaat ttaggatcaa gcagtctgat taaggatttt  
17761 cccaaaagac tttttccaac cccactctca cccacaatca tcaaactctt agctatttta  
17821 atatcaaac ttatattttc aaagatcttt ttttgattta attttaagct taaatttctt  
17881 acctcaaga tcttactcca ccgatttttt gcagataaatt tccaagccat aaaaggggta  
17941 agaataaaaa cataagagct aaaagtggaa acaatatcat ccaccaagca cctataaaaa  
18001 tagcttttga agattcgttt aacaaggttc ctaaagtcgg tatattaaaa ccaagtccta  
18061 agcaaaaaaa actcaaagtc gcttcagtag ctatggcatg aatgatatta aatacaaaaa  
18121 gaacaaatat taaagatttt aaagctggca ataaatcctt aaaaaaagct ctaaatttag  
18181 tccttcctag cgccataact gctttataaa agtctaaatt ttctaacttt tttagctcgc  
18241 tttctataat ctttgctata aaaggccaat gcactaaagc gattaaaaaa atcattaaaa  
18301 atatatttac acccaaaaa ctttgaaaaa acatcatcaa taaaaaagca ggcaaagcta  
18361 aaaaaagatc taaaattcgc atccaaaaag tataaaaaaa acatcttgct aaaaaataat  
18421 aaaaaagagc aaaaaatata gacaaaaaag aactacaaat tcctataaat aaagagattc  
18481 tcaaagcaaa aagcaaagc gaaaatacat ctctgcctaa aaaatcagcc cctagataat  
18541 aagtcaaatt aggagcttgg tgcaaatgat ttaaagact ttctaaaaca tcaaaaggag  
18601 ccaataaagg cgcaaacaaa gcacctaata tcaaaaacat taaaggtgta agaaagagta  
18661 ttatctttaa caaatttcaa cttttttaat cttggattta aaatccaagc aaaaacatca  
18721 cttaaaaatg taaaaaagc agcaagtaaa acactaaaaa atatcaaagc caaagccata  
18781 ggaaaatctt taaaaagaat gctttcaaaa agcaaactcc caagaccctc ataagcaaaa  
18841 aactctcaa ccacataagt tccatcata aagcttaaag cactgcctcc aaaataagct  
18901 ataatagggc ttaagaata tcttaaaacc aaaaaataaa tatctttttc ctttaaagct  
18961 ctagcgtata aattttgaac aaaaatttgc gaaaaagttt cattgatata atttctagct  
19021 atgcgcaaaa acaaagctaa atgagataaa acaagcacta aaacaggcaa aataagatgt  
19081 tctaaacggg taaaaaaatc atcttcaaaa cctatatcac tagtccctgt tataggcaaa  
19141 acctgcaaaa aaattccaaa aatcaaaaaca aaaaaataag ccaaaacaaa aggtggttaa

19201 gcaaaaaaat taaaggctaa aaaagtgatt aatttatcta taaaactttc tttataataa  
19261 tgcccaaaa gagcaagaaa aacactgagt aaaaacaaaa gcactaaggc actcaggcct  
19321 aaaatcaagg tatttgccat cttttcttta atgagcttta aaacactttc cccgcttaaa  
19381 aaagaaacgc ccaaatcccc ttttaaagcc ttaaaaagcc aaatttgata ctgctctagc  
19441 aagggcttat ccagccctaa atttgcttct attctttgaa ccaattcctt gctttgagaa  
19501 ttgactttat ttgcatacgc tacactgcct ttgctaaaat aaagcaaaac aaagcataaa  
19561 aaagtactaa aaaatgcatg aaaaacacta aaaactaagc gttttagcac tattttttac  
19621 tccactcata aatattccaa gtaaagccta ctccatgatg gcctaaattt cttgctttaa  
19681 taccctcaag cttagcatta taaaccaagg caaaatcaag ataagttaga aaaataaaag  
19741 gaggattttc atacaaagca tcaataaatt ctttataata ctttttacgc tcttccaaat  
19801 ttaaagtatt tctagctttt tgcaaggcta tatctacctt tttatcatga taatgtccaa  
19861 aattccaacc ctattattt aaggcactat cttgcgaact ttcaaacact ctaaagggtg  
19921 gaaaatcagg atctaaagga cttccccaac ccactaaaa actatctact ttagaataat  
19981 caaaactgcc cgcaggcttt gccacaacct tagctataac ccctattttt ttaaactcac  
20041 tttgcaaaat tcctgcaaaa ctcaccctta aaggatcatt actcatagtc caaatttcaa  
20101 attctaaaat attgccatct ttttcaaaaa taccctcatc atttttctta aaacctaaag  
20161 ccaaaatcaa atcttgggct tttttaggat tgtattcata agttttaaaa gctttagaat  
20221 ccgcccacga acgctctaaa ggatgattgg ctacaaaacc ataatcatgc aaaagatttt  
20281 taactatact ttgcttatca acagcataat ttaaagcctt tcttatttga atatctttta  
20341 aaaattcatt atctaaatta aacattaag ctctataatc agcagatctt tcacgcaaaa  
20401 tcttaaaatt ttcatccttt ttaaaaatat tcaataaaga aacatcaatc aatgccgat  
20461 caattttgcc atttttaagc tctacgcttg caactgaagg atcaaaaata tgtttgatga  
20521 taagccttgg agtttttact tttgcaagat aaaaattctc attggcttta aactctacat  
20581 attcaccctt tttccatttt acaaatttat aaggacctgt gcctatggga ttttgattaa  
20641 aagaagcagt gtttaagtct ttatcactaa gtaaagtctt aggaagcatt cctatactta  
20701 aagcgtctaa aatgcagga aaaggtttag aaagcgtgat ttttaagatga taaggattta  
20761 aaatttctat acttttaatg tcttcaaaat tcacataaac tgaggaatta tttttaggat  
20821 ttttaaaagc ttcaagactg aatttaacat catcagcact aaatttact ccatcgtgcc  
20881 acaaaacatc ttcacgcaaa aagatatcat agctaagtcc atccttgctt acattccacg  
20941 acgtagccaa atcgggcttt aagctcatat gctcatcaaa acgcgtaagt cctgaaaata  
21001 caagattaat caccgcatca tgatcctcgc tatatgcagg atttatcctt gaaatttcat  
21061 tttccacagc tacgattaaa gtatcttttg gaattttagc ctcaagattg aaaaacaata  
21121 aaaacagcaa acaaacat ctaagcactt gcaactcctt gaaattttaa gattaaaaaa  
21181 ttataaaata aaaaacaaga agccacaagc cctatagggg gataatttgt ttaaattgtg  
21241 gggtttattt attctatggt aaattgcttc actgcattca tccaataaat acgctatatg  
21301 ctgccaagat ataccgtag catcacttaa tcctatctcg caagtgcttg atgtactaaa  
21361 tccgcgcttg atattcgttt tggcataaaa ttttttaaag ccctttgtag cattaatatt  
21421 taatttagga ttgaaaaaac ctttatatcc agcaaatccg caacaatagg tatcattatc  
21481 tattaatact tttccatttg tgcatagctt tgcaagcttg atttatattt catttaagcc  
21541 aagttttcta gcagcacaca tgatatacaa tcctacatct tcattgattt tatcaatgag  
21601 taacttaggg gcaataaatt ttaacaata ctacttaaa tcataaattt catactttaa  
21661 atgatcacta attaatntag cactacaagc actatgatct agcactatgg gtgagtctat  
21721 attgcttaaa aatcattga ttttttgat atttttatct tggatatctt gaaaattctc  
21781 ataagcctta ccacaacata aatcgttggg cgcataaata atacctatat ttgctttttc  
21841 gcacaagctc tcaaatactt cttgcaagct tcttttgta tacattttt catttgctt  
21901 aaagctttta ttaagacagc ttgtaaaata aaccacatta taagctctt tacgactttt  
21961 taactcataa tcattcacct taggcaata cgccctagtt cttggtatgg cgctaagaaa  
22021 attgcttgct ttttcaagtt tattatcaag acttaaaata tcaaatttat ttgctgatact  
22081 taatgaaaat ttagcaattt ttagagtttt tcatggttt ttatatgcta gatttcctaa  
22141 aattttagac ataaatccta tattattttt tctatatttt aatgaaaaat cagcaaaatt  
22201 aatcccaaaa gggcacgaaa aagagcacac ccacaagca gcacaagagc tatctactaa  
22261 atgattgtaa tattttttta tatcctttta ttttgctttt gactcatcat catttaact  
22321 ttcaagacgt tttatctctc ttaaaatagc aattctttgt cttggagtaa ttgtatattc  
22381 attcgatgga caaatcttt cgcaaaatcc acactccata caggatttta atttctatc

22441 aattaaactc gcttgcttga ttttttctt ataaatatct ttatcatcac taatgattac  
22501 atcaggatta aataaattct cttatcaaa gatacttttg attttttgt tgattagata  
22561 agcttgctta cccactcta cctccacaaa aggcgctacc atgcgcctg tgccatgttc  
22621 agcttttata cttccacat acgaagctac tatattagac atttctttaa ctagatttga  
22681 aaaattatca aattcaagct tattatftaa atccggcgta atgataaaat gaatattgcc  
22741 cgctaagca tggccaaaa tgattccatt atcactaaaa ccatatttat aaaacaattc  
22801 ttgaatgctt ttaattccat cagctaaatc ctcgatatta aaacacacat cttcagtaat  
22861 caccgttgaa cctgcctttc taaggctagc tgctataggc aaaagcgctt ttctaattct  
22921 ccaccataaa tcatattcgg cttattctt gctaaaatat gacttataag ctaattttga  
22981 aatttctttt attttattta tttttctatc aagcttaagc tcattactat gctcgtttg  
23041 gatcaataca caagtatcac cctctttaat atcagctaaa atatctctta gctcatcata  
23101 gcttgatgca gcttttaagc ttgcatagtc catgatttca gcagagctta taaaatcaac  
23161 tttagcaaat tcttttatag tgtttgcagc attattaata ttatcaaaaa acaataaagc  
23221 acaggcctta aattccaaat catctaaaac agcaagctta acctcactta caaatcccaa  
23281 agtcccttca gagccaacaa gcaaatgtgc taaaatgtct atttcatcat cataatcaac  
23341 aaaggcatta aggctatagc ctgtggattt tttgatttta aattttttga ttattaaatc  
23401 ttttaattct ttattggcat taatctcttc tttgatctct ctaagctcat taattaattt  
23461 tttattctca tttttaaatt gagccacact taaagcatcg ctagtatcaa gtatgctacc  
23521 atttgccaaa atcacctaa tgcttcttaa ggttttatag ctattatcct tagttccaca  
23581 gcacattccg cttgagttgt tattgataat ccctccaatt aaagctgaat ttatagtagc  
23641 tggatcaggt cctatttttt tctttaaaaa agcaagactt tcattagcat gaatacctac  
23701 tacaccagat cccaaagtga tttcgtagc atctttgtta atttttatft ttttaaaggc  
23761 aaatttaatc accacaagta cccatcaca agagctttgc ccacttaaac ttgtgcccgc  
23821 tgcccataat gatatgggag ttttataagt atgtgctaata tgaataactt gcttaatttc  
23881 atcttcgttt ttagcaataa tcactatftt tggaaataaa aaataacacg acgcatcaat  
23941 gccataagca taacatctag cataatcatt aaagattcta tccttaaaaa tatacttagc  
24001 ctattataa aaagctftaa aatttgccat gatccctctt tftaatttat tatcaattat  
24061 ataacttaat aatttaaaaga caattftaaa tttatatttt tgagcataaa tftaacggaa  
24121 gtcaattftt ttatctggat taaaagttag aataccctc atfttaaaaa tftaaagaac  
24181 taaaaggaga actatgacac aagaacaaat tcaaattatc aaagattgag taccaatttt  
24241 acaaaaaaac ggggaagatt taacaaaaga gttttacaaa gtaattgftta atgactatcc  
24301 tgaagtaaaa cctatgftta atatggaaaa acaagcatct ggggagcaac cgaaagcctt  
24361 agctatggct atfttaatgg cagctaaaaa tatagaaaaa ttagaaaaata tgagatcatt  
24421 tgtggataaa gttgccataa ctcatgtaaa tttaggggtt aaagaagagc attatcctat  
24481 agtaggagct tgtctfttaa aagctatcaa aaatctftta aatcctgagc aagcaacact  
24541 taaagcttgg gaagttgctt atggaaaaat cgctgaattt tatatagata tagaaaaaaa  
24601 gctatatgaa aaataataaa agcccatttt tgggctftaa tcaaatttct ctaccaaat  
24661 tctagccaat tctttgatat tttcaccctt taattcgtctg atatttctt cttcagccaa  
24721 aaaaattcta tctgcactat caaaatagc atcatcatga gtaattgcaa aaatcgtctt  
24781 accctgttct tftaataaag gtaaaagctt tttgtaaaaa aatcttctaa aaaccggatc  
24841 ttgatctgct gccattcat caagcactaa aatatctctt tcttcaagca aggctataag  
24901 cattgccaaa cgctfttttt gtcccgtaga aagcttgggt aatacaagct cgtgatcctc  
24961 cactctagtt ttacccttaa gctctaaaaa ttcaagccaa gaagcaattt tttcttcatc  
25021 tgcaaatftc tctttcgcta aagctttagt aaagagatga aatcactaa acacagccga  
25081 tactaaagac ctataaatat ctaaattatc atcatcaatt ttcatatcat ctacaaaaat  
25141 ttcaccctca cttggcttaa aaagccctgt taaaagcata caaaaagtag atfttccgct  
25201 tccgtftttt cctattaaaa atatcaattc tctftttfta agctccaaat ttacaggatt  
25261 tagatgaaaa ttatcatcat aagaaaaact cgtatftfta aaagaaattt gacgccaatc  
25321 cttgataaaa ttggtftttt caaatgctc tttataatca tcaagttcta gttttgctat  
25381 cttatctaga gcgattftttg ctaaaagcaa ggtaggaaaa gatcctatca tcgaaaccaa  
25441 aggggttctt aaaaataaaa ttgacaatgc tatcgttgtt gcttcggcta cactcgccca  
25501 cttaaattcc aaggctaaat aaaattccac ccctactaaa gctagaagtg ctacatttgt  
25561 aaaatttgat gaaagattgt taaaaagatt gcctagggtg ttatftttct tfttagatct  
25621 tgcattgftt tcaaattcat cttcataata aagcttagcg cggtagcagat tgattaaaag

25681 ctctttatgg ccatctaata tattttgata attattttgc aaagcatcat cattttctct  
25741 tgctttgcga aaatacgaat aaactttcat catcaaaaaa ttattaatag taaaaaccac  
25801 aataatccaa atcgcacaaa gggtaaaaaat ttgaggtgaa agatagcaca aataaacact  
25861 agtgcaaagt atcaatatac ttgattgtaa aaaatcaggc aatctcaaaa gcccaaaaga  
25921 tacatttctt acatcactgc ctaaagaagc taaaattctt gccttaccta cttttgcgac  
25981 ttttaataaa ggagtatcta ggatctgctt tactacgcgt ctttgcattt tgaaaatgaa  
26041 attttgacca aaaacgctta atcctagctc tactatagta gagctaagaa aaaacactat  
26101 aagcaaagcg ataaagtata aaatagggat attttgtgta tttttaagca aataatcatt  
26161 gataaaaatt agggttaaaa cccctacagc acttgagata aaagaaaaaa gcaaaaaaga  
26221 gatgaattta aatttatttt gttaagcaa ttctaaaata aaaggcattg ataaaaactc  
26281 cgaaagtata attaaaaatt aattatagca ttttaagagc gattatcaaa atttatttta  
26341 tcctttacaa ggaaaacagc acaaatagcc aataaagcta gaaaaatcat atacatactc  
26401 attccatata aaaatggatt tttacttcta gtagcaagga tattgagcca caaaacaagt  
26461 tgaggagtaa ctctcctgc gatagcataa gcgatattat acgaaaaaga aattcctgaa  
26521 aatcttattt tagccctaaa aacttcactc attaaaatag gagcaaagac attaatcca  
26581 cctaaaaaac aaacacttgt atataaaata caggttaaga caagattttt aagatcatat  
26641 aaagcataaa aatacaagca agaaaaaat gcaaaaaacta aagaaaagaa aatacaaatt  
26701 ttaaacaagc ctaatttatc cacaagatag ccataaaca ctccgcctag tgttatactt  
26761 aaaattccta gaacttgtaa ataacttctt tcaatcgac tcaagcccaa aatacttggc  
26821 ataaatttag gcattaataa gataagcact acaacacaac ctgttaaac ccaagttata  
26881 aagatagacg cgagcgtatt tttgaaaata ttttcttctt taaataagtc ctaagcgga  
26941 aaagaactca agcttcgctt tttttgcatt tgtttaaaaa taggagtttc ttgtaaaaat  
27001 ctacgcaaat aaatagaaat aatcccaaaa attccacca caaaaaagc aatacgccat  
27061 gcataagctg cgatttcttc ggtgctaaaa aaagcattaa tcagtaaaaa taccatactt  
27121 cctagtaaaa ttcccaaagc catagccgaa tttaaacaac tcaaagagaa agccttttgg  
27181 ctttctttgc aatgttcctt cacaaaaacc caagcaccag gtaattccc gcctatagca  
27241 ataccttgaa aaattcttat aagtataagc aaaaacggcg ctaaaaaac aagagtttca  
27301 taaccaggta taaaagccaa tgtaaaagta ggaagcacca taagcaaat acttaacata  
27361 aacatatttt tacgccccaa tttatcacca aaatgcgcca tcactatacc acctaaaggg  
27421 cgcgctaaat aacctgcagc aaaagctcca taagtattta acaaagtcca aaattcactc  
27481 atatctttag gaaaaatac ttttgcgata tattcagcaa aaaatacaaa gatgataaaa  
27541 tcataaaatt ctaaagttcc acctagtac gaaagtccta aaattttaaa ttcttttgtg  
27601 cctagttttg attttttcat tttttatac cttaaagaat tttaaaaata accattatac  
27661 tacaatatt tataaaacaa acaatcattt tcaatttaat tttaatgata aaaatcataa  
27721 aatcagctt aagcaaaatt ttttaataatt tttcaaaaa acgcacaaag ctgtcataag  
27781 aatactttat actttttttg aaattaaaat caaggagaaa aaatgcaaac ccaagcttca  
27841 aaaaccctaa atacttttta caagataaaa agaactatat ttttatctat agcgcaaaat  
27901 aacaatattt tagcaaggta aaaatgatga ttattgtagg gatttttagga cttatcatta  
27961 gcacagcggg tttgttagct tgtgggggtg tttggggttt atttgggatt gtattttggg  
28021 gagtgatttt agcttttatg cttttggatt taagtggaag ttatggtgtg gtggcacttt  
28081 atatactttt tatagtgctt aatttaattt taatttataa aattacaagg agaaagaaat  
28141 gaaaaaatta gcttttagct taggcggaat cgcactaggt gcttgtggtg gaaaaatcta  
28201 tcaaggtatt aaaaatactt gggataaatt gattttttaa gatctcatca cccttagaaa  
28261 agtcatcaaa caatacgaag aaatagagca aatttatcct agctatttaa acgatcttaa  
28321 attttttagaa tttagaaaaa cccacaaata cgatacagaa actatttata atataaaaga  
28381 tcatttattt agcgatctaa aaaaagaaaa gcttatccaa ataggcacta caatggaagc  
28441 ttttatggaa tatagtataa aatatcttca agatgatata acagcattaa aaatcagctg  
28501 gaaattttgc gctatgaaat taaaatttga tgggtccttg ttgcagttac aagatgtaaa  
28561 caagatggta taaagagtta aaatgcaaga aaatttataa gaaatttatg aagaatttga  
28621 atttttaaat actcaatttg caagctattt taatgatgaa gaatttgcaa attttaaaaa  
28681 agattttgaa gcaaaaaatg ctttaaatca cgcgatttc gaagaattta aactagaaga  
28741 aacagataaa aaaaggctta aagatataca agaattgtta ttggcttata tcaacttttg  
28801 tagcagtaaa gatataaaag aaaagagagt agaggtgatt tctaaaacct ttatgcctat  
28861 gtttcttatt tctaggttgt attttgcctt aaaagaagaa aaactagata tgcaaatcgc

28921 caaaatactt aaggaaaaag atgagttgga agaggaaaaa tctttatgga tttccaaagt  
28981 cctgcctttt taagaatcct taatgaaatc ttaaaatata ttgattttta ataaacaaaa  
29041 tgttataatt tataaaatth ttaaggagat aaaatggaaa ataaatcgca agaaaacaca  
29101 gttgatttaa atgcaataat gagtgagttg ctgcaacaag gacaggaaat gtataactca  
29161 tctaaaaaac aagataagtt ggataaatta aatatcttaa ttattggcgg aacaggcggt  
29221 ggcaaaagca cacttattaa cactgtgttt ggtaaagaag tagcaaaaac aggtgatggc  
29281 gcaccagtaa cacaagcgat acaaaaatgt gaaaaaaagg gtttgtgtat ttacgatagt  
29341 aaaggacttg agaaaaatga tcctagcata gtagaagatt taaaaaattt actagacaaa  
29401 caaaagcaaa aagaagtaag cgaacaaatt catatagctt ggctttgtat ttgtgaggca  
29461 actaggagag ttgagccatt agaaaaagaa ctttatgatt tgctcaaca atacaatttt  
29521 cctactatag tggcaatcac caaagcaatg caaaatataa atgacaaagg tgaaaaattt  
29581 gatgaaattg taaaaaatga gctaaaggct acagaagtga ttcgcattag agctatagaa  
29641 acaaaattag atgatgatga agaaaaatatt ttaaaaccaa tggggataaa agatttatta  
29701 acaaatcctt ataacccttt gcctgaagca caacaaaatg ctttagcaag aaagcaaatc  
29761 tatgatagag atatgaaaa aatacaatgt aaaaaagatg ctacttctaa gctaaactac  
29821 tactctacia cagctggtgc tgtagcagct acgcctatac cttttcaga tatagcactt  
29881 attttaccia cacaatagc catgatagtg catattagta gtatatataa tttggatttt  
29941 gacaaagaaa gtgcaaaaa ggtaacttta gcattggtag gggtttgagg agctggtttt  
30001 ggcataaggc ttggagttgg agctgcatta aaattgatac ctggtcttgg aagcttagca  
30061 ggtggcgcta tcaatgctac agttgcaaca actgccacia aagcaatggg agagctttat  
30121 ataaaatatac ttgatgatca ttttgatgat attgaaaaca ataaatcttt atcatttaat  
30181 tttgaagatt ataaataagc attagaattt ctaatgctta gacaaggagt ttttatgcaa  
30241 gttaaaaccg aagaagaatt agctaaggct gtttaataata atgaaaatcg tatagagata  
30301 gagggtgatt tggcggaaaa agtaattaaa atcaaagctt ctggaaatgt cgcttgggag  
30361 gtagctatag gtagtatagg tgttgctgta attgcaataa tttctctttt taaaaattct  
30421 gaatctaaaa attctcaatc tcctaaagta gcttttgggg ctagtggaat aggtgctaca  
30481 acggcagcgg gtgctgttgg agtcttagga ttagcaacia caataagtgc aataaaaatt  
30541 gctgtatctg gtgggtgaaa ggatgtttta aaaaaactaa gaaactataa aatggaaaaa  
30601 atttctgaca caaaaatcgt attaaaaaac gaattattat ctaaaggata aaaatgtttt  
30661 gtaagctttt aaaggctttt attagcaatc caagaagttg gtttttgttt tatcgtttgc  
30721 gaaaacttgg tttttgtata aaagaaaatt tcgataaaga aacaaaatat tcagcagtat  
30781 gcaaaagtct cgacgagcta gttaaatata aaaataaaca tccaaatgat tttgataatt  
30841 tttttaagat ttttaagaa attttgaatg attatgaaaa aagtaaaaaa tgagggtgtaa  
30901 taaaatgtat tataataaaa tcttttcggc tttgtcttta gcgaaatagct ttaaatctac  
30961 gattttcaaa cgcatatcaa gtccggcaca aagtgctaga atgatcgatt ttgctttaga  
31021 aatcaaaagc atattttctc acaattcaaa agatgaaata cctattaaaa tattagacaa  
31081 attagttgaa tataaaaata aatatccaaa tgattttgat gaaatgtttg aaattttaaa  
31141 agagatttta gatgagtatg aaaaaaatcc aagcgaagtt aaaaaaatt taaaagaact  
31201 tttctaaaat gcaaaatctc ttaattctct ataatcctta ctatcaacia gatgttataa  
31261 aattgcattt agaaatttta ttagacaaag gtcaggtagc atttggtaaa ataaaatcta  
31321 aactaaaaga gccactttct tatgaaatgg atgaaaataa aatctcacac aatcaaaaac  
31381 tatcagaaat ttacaaaaat acctctgctg ataatccttt acagcttttt ttgagtgatt  
31441 atgcaaattt atttgtagca aaagtagtaa aaataagtaa agaagtagat gaaaatatca  
31501 ttccaaaata ttatcaagag aaaaatttag aggtggagga ttatttctta atcacagatt  
31561 taagagaatt ggtaagagaa aatttcacac tcataagaga taaattttta gctaacttca  
31621 caacagaaaa taaccacact tacgcaattt atggcaataa ctattcttat ctttagtag  
31681 tcaaacaaaa agaagaattt aattattttt atgatgagat aaacaaatc tacctaagcg  
31741 tttataaaaa tcaagagtat ttaaaaatgc aagaaaattt tatacaattt atctttggta  
31801 aaaaattttt ttatatgcta catcctgata gtatcaataa cttatccta gcagagctag  
31861 aattgcaaca aaacttagaa aatccacttt atgacttcac ttcaataata gtaaaatact  
31921 ctaaaactat agaatatgaa gtatatgact ttgccaaaaa gatatttaca aaactcatca  
31981 accaaaattc ccatctttca tccataaact atagcgtaca aggaaaagaa ttttaacttta  
32041 aacagttttt catcaacaaa cctaatatcg gaacaattaa gtttttattt aaaaataaag  
32101 aaattcaaga gcttttggac aaggatataa aaggctttat caattatgaa tttaatagaa

32161 ccttagatga atttcaaaca atacgaaatc atgcagtaca tgcaaaatca ccgacttttag  
32221 aacagacatt aaaaattcga aattttaattt taggtataga aaatactagc attttaaaac  
32281 gcgtattaga gtataaattc aaataaaaag gataaaaatg ataaaaccaa agccttttct  
32341 taaaaaatgt ccaaagtgtg gaaaaatgtt tttatgtact cctaagagtg attgtttaaa  
32401 tccaagtgat ttttctgcg ataaatgtag cggcaaaaaa gatacaaaact tgataagcaa  
32461 aattatttct gcaattaaaa aggtttaata tggcgcacga taaacttgca atgcgttttag  
32521 ctcatatcctt aatgcgtttt aataatggag gaaggttttag cctagaagaa ttagcaagtg  
32581 aatttaaatgt agatattaga accatacaaa gagatttaaa ccaaaggctt tcttttatgc  
32641 ctatccaaaa agaaaatgga aagtattttt tagaatcttt tgcactaggc aagcttagcg  
32701 ttaaagatat acaaaatfff gctatgttaa gcggggttca agagctttat ccgaagctag  
32761 atgaggattt tataacagat ttgctaaact ctaaagtaaa tagcattttt atgataaaaa  
32821 acaatggctt tgaaaaagtt gattatgaaa attttgaaat cattagtgtt gcgattttta  
32881 aacacaatat tttaaatfff aactataaag aaaaaagtcg cgaagtcaaa ctttataagc  
32941 ttttaaacta tcaaggaatt tggtatttaa tagctgacga aaaggacaaa ttaaagcatt  
33001 ttacttttag caaaattaaa aatattcaca aaaataatga aatttttacc ctaaagaag  
33061 aatttttaga ccaaattcta catgataaaa atatttggct agatgatagc aaggaagcta  
33121 tcgtaaaact tgataaaaat gctaaagagt attttttttag aaaaaatatt ttaaacaact  
33181 ttgaactcat cgatgaagac gagcaaagct atactctaaa agtatatfff tcctatgatg  
33241 atgagcttct aatgtagta aaacaatgga taccctatat aaagatagaa aaaccttttg  
33301 agctgaaaga aaaactagat agcatttttaa aagattactt ggaaaactaa tttcttaata  
33361 aattcaaaata ttttttgcta taatcacagt tttatttttaa tgagaggaga aaattttggc  
33421 aaaagacgat gtgattgaaa tcgatggcac agtgcttgaa gcattaccta atgcaaattt  
33481 taaagttgaa cttgacaaca agcatgtgat tttatgtcat atagcaggaa aaatgcgtat  
33541 gcactatata agaatcatgc caggggataa agttaaagtt gaacttacac cttatagcct  
33601 tgataaaggg cgtatcactt ttagatataa ataataaag ttatttaaaa gctaatttta  
33661 gataaaatta acatttttgc gacaaaatgt atcgaactat atgaagaggt atttttaaaa  
33721 ttcaccactt attttaaaaa tagttggtta ttcataaaac ctgatgcagt cgtaaatagaa  
33781 gtggaattca ttttaaggaga actcatgaaa gtgagacat cagttaaaaa gatgtgcgac  
33841 aagtgcaaag tagttcgccg taaaggcgta gttcgcatta tttgcgaaaa tccaaaacat  
33901 aaacaaagac aaggataaac atggctcgta tcgcaggtgt ggattttacca aagaaaaaaa  
33961 gaattgagta tggacttacc tatatfffatg gtataggact ttttacttca agaaaaatct  
34021 tagataaaac aggcatfffct tatgacaaaa gagtgcata gaactaagcga gatgaagcag  
34081 cagctatcag aaaagaaatc caagaaaact atatggttga aggggattta agaaaaacaag  
34141 ttgctatgga tataaaagca cttatggatt taggaagctt tagaggctta agacacagaa  
34201 aaggcttacc agttcgcgga caaaaaacaa aaacaaacgc aagaactaga aaaggtaaga  
34261 gaaaaactgt tggtgcaaaa tcataaggat aaaagatggc aaaaagaaaa atcgtaaaga  
34321 aaaaagtagt taaaaaaaaat atagcaaaag gtattgttta tatcagtgca acttttaaca  
34381 ataccatggg aactgttaca gatgaaatgg gaaatgctat cgcttggagc agtgcggggc  
34441 gtttaggatt taaaggttct aaaaaatcaa ctctttatgc ggcacaacaa gcagtagaag  
34501 acgctttaa taaagcaaaa gaacacggaa tcaaagaagt aggcattaaa gtacaaggac  
34561 caggaagcgg tagagaaact gctgttaaaa gtgtaggtgc tatggaagga atcaaagtaa  
34621 ctttcttaaa agatattact ccattagctc ataatggttg cagaccgcct aagcgtcgtc  
34681 gtgtctaaga tataagaaaa aattaggaga attaattatg gcaagatata gaggaccagt  
34741 agaaaaatta gaaagacgct ttggtgttag cttagcatta aaaggagaaa gaagactagc  
34801 cggaaaaagc gcattagata aacgccata tgcaccagga caacacgggg caagaaaagg  
34861 taaaatcagc gaatacggac tccaattaag agaaaaacaa aaagctaaat ttatgtatgg  
34921 agtaagtgaa aaacaattca gaagactfff tgcagaagct gctagaagag atggcaatac  
34981 aggggtttta cttatccaac ttttagaaca aagacttgac aatgtagttt atagaatggg  
35041 cttgctaca actcgtcgtt ttgcaagaca acttgtaact catggacaca ttttagtaaa  
35101 tggaaaaaga gtagatatcc cttagctttag agtagaagca ggagcaaaaa tcgaagtaat  
35161 agaaaaagc aaaaataatc ctcaaatcac aagagcgatc gagcttactg ctcaaacagg  
35221 tatcgttgct tgggtagatg tggaaaaaga taaaagattt ggaattttca ctagaaaacc  
35281 tgaaagagaa gaagttatca ttccagtaga ggaaagattc atcgttgagc tttactctaa  
35341 gtaatagggg ctaaactatg agaaacatta caacatctgc ttatacgcca acagaattca

35401 ctatagaaaa tattagtgat actgtggcta aaatcagtgc ttggcctttt gagatcggct  
35461 atgggtattac cctagcccat cctttacgcc gtttacttta tactagcact ataggctatg  
35521 ctccaaccgc tattcatatc gatggcgtgg cgcatgaatt tgatagtatg cgtggtatgc  
35581 ttgaagatgt agcacttttt atcatcaatc ttaaaaaatt acgcttcaaa cttaaaagcg  
35641 attctaataa agaaatcggt gagtttagtt tcaaaggccc taaagaaatt tatggtaaag  
35701 atttaaacia cgatcaagtt gaagtcgtaa atacagatgc atatttagca acaatcaatg  
35761 aagatgctga acttaaattt actcctatca tagaaaaagg cattggttat gtaccaagtg  
35821 aagaaatcaa agaacttatc aatgatccaa aattcatagc tcttgatgct tttttcactc  
35881 ctgtaagaga ggcgacttat gatattgaga aagttttatt tgaagacaat cctgactatg  
35941 aaaaagtagt tttaacagta actactgatg gacaaatcac tccaaatgaa gcttttcaaa  
36001 atgcttttaga agctatgtat aagcaattat cagtatttga taaaattaca aatgtttagaa  
36061 gtatcataaa aagtcaagct acaagcaatg aattagaaaa tactaaatta ttgcaaaata  
36121 ttactgatct caatttaagt gcaagaagtt acaattgcct tgaaaaagca ggaattgttt  
36181 atatcggaga gctcgcctta atgagtggtta atgaacttgc tggacttaaa aatttaggta  
36241 aaaaatcttt agatgaaatt aaaagcatta tggaaagcat aggcttcctt gtaggtactt  
36301 ctaagcttag tgataataaa gatttgctta agaaaaaaat cgatgaatta aaagcacaaa  
36361 acgaaggata aagaatgaga cataaacacg gatatagaaa acttggcaga acttcatctc  
36421 atcgtgctgc cttgttaaaa aatttaacta tagcttttagt taatagcggg aaaatcgaaa  
36481 caactctacc aaaagctaaa gaattaagag gctatgtaga aagattgatt actagagcaa  
36541 gacttggaga ttttaacgct cacagagcag tttttgctgc tttacaagat aaaaatgcta  
36601 caacaaact tgttacagaa atagctccaa atttcaaaga aagaaatggt ggctatacaa  
36661 gaattatcaa aacaagaatt cgccgcggtg acgcagctga aatggctttt attgaatttg  
36721 tagcctaaaa attccagctt aagctggaat tttaaaattt tctccttata attttttaac  
36781 ctactaattt tttacaaatc caaaaattca aaatcatatt tttaaatcta attttcaaaa  
36841 aataataaaa attcttaaat gattatttaa aaaataattt tttagcaaaa ttttaactac  
36901 ttatgctaata ataatttttt atttttataa atgcaaggat ataaaaatag caagaaaatt  
36961 ctcgtttgcg tatagctata caaaaatcag gcagactctc taaagaatcc gtagaacttt  
37021 taacaaatg cggaattaaa atgcatatac atgagcaaag tctcatagct ttttcaacca  
37081 acctaccat agatatctta agagttagag atgatgatat acctggtctt atctttgatg  
37141 gagttgtaga tcttggcatt ataggcgaat atgttttaga agaaaatgaa ctcgaaagaa  
37201 agagcttggg cgaagaggca aattacaagc ttttgacaaa gcttgatttt ggttattgta  
37261 gactttcact tgccttgccct caagagaaaa aatttgataa tttgaaagat tttgaaaatt  
37321 taagaatcgc cacttcttat ccacaacttt taaaacgctt tatgaaagaa aacaatattc  
37381 attataaaaa ttgtatgctt acaggttcgg ttgaagtagc tccaagagca aatttagccg  
37441 atgcgatttg tgatcttggt tcaagcggcg caacactaca agcaacaat cttaaagaag  
37501 ttaaagttat ttaccaatct cgtgcttggt tgatacaaaa acaaaatact ctaagtagtg  
37561 aaaaacaggc tttggttgat aaaatcatgc ttcgcgttgc aggggtaatg caagcaagag  
37621 aaagcaata catcatgctt catgctcaa aagaaaaact tgacaaaatc caatccctac  
37681 ttccaggtgt agaaaagcct actatcttac ctttagcaca tgatgaaaaa aatgtagcct  
37741 tgcatatggt aagtaaagaa aatctttttt gggaaactat ggaagcttta aaagaagaag  
37801 gtgcgagttc gatttttagtt ttacctattg aaaaaatggt aaagttagta aaaaatgcaa  
37861 ataataaatt ttaacgagtt agacgaaaaa caaaaacaag aagtattaaa acgccctgca  
37921 atagcagcaa aagatgaaat ttcacagata gtaagttcta tcattaagga agtaagagaa  
37981 aaaggcagat aagctttgat agaacaggct ttaaaatttg acaaagcca aatttcaagc  
38041 atcaaagtaa gcgaagaaga gcttgaaaac gcaagctcac gcttggataa agacttaaaa  
38101 gaagcgattt taatagctta tgaaaatatc aaaaaattcc atgaggcgca aattcaaaa  
38161 gaagtagcca ttgaaaccac caaggggtgta aaatgcgaag ttttaacacg ccctattgaa  
38221 aaagtaggac tttatatacc aggggggtttg gcgcctttat tttcaacggt tttaatgcta  
38281 gcaattcctg caaaaatagc tcaatgtgaa aaaattgttt tggcaagccc tgcaaaaata  
38341 aacgatgcta cacttttttg cgctaagctt tgcggagtag atgaaattta tcaaatgggt  
38401 ggtgcaggag ctatagcagc actagcttat ggaacaaaaa gcgttttaaa agtagataaa  
38461 atctttgggc caggtaatgc ctttgttacc gaagctaaac gccaaagtaag cagtgatata  
38521 aatggagctg ctatagatat gcaagcagga cctagtgaag ttttagtcat agcagatgag  
38581 aaagcaaatg ttaaatttgt agcaagcgac ttgctttcgc aagctgaaca cgggtgcagac



38641 tctcaagtga ttttggtatg cttaagcaaa gaatttgcac aaagcgcgag tgatgaagta  
38701 agccgtcagc ttgaaaatth accaagaaaa gaattagcgt ctaaaagcat tgcaaattct  
38761 aaaatcatca ttgcaaaaaga cttagatgaa gctcttttga tctcaaactt ttacgcacct  
38821 gagcacttaa tcatacaaac acaaaatcct cgtgagcttt tagataaagt caaacacgct  
38881 ggatctgtat ttttaggtga gtttaagccca gaatccatgg gggattatgc aagtgggaca  
38941 aatcatgtct tgccaactta tggacttacc aaaacgcatt ctagcttggg cttggctgat  
39001 ttttagcaaaa gaatgagcgt gcaagaactt agcaaagaag gctttttaaa tttaggaaaa  
39061 agtgttgaaa ttttagctgc aaatgaacat ttagacgcac ataagaatgc agtaactttt  
39121 cgcttagaaa gtctaaaatg agtgaaaaaa tcctttttat cgatagagat ggcaccatca  
39181 tagaagaacc aaagagcgat tttcaaactg atagccttga aaaacttcgt tttgaaaaag  
39241 gtgctatccc tactctttta aaacttaaaa attttggctt taaatttgtg cttgtttcta  
39301 atcaagatgg ctttgggact caaagctttc ctaaagaaga ttttgaaata gcgcatcaaa  
39361 aaatgtaga tattttacaa agctgtggta tagaatttaa agatattttc atttgtccac  
39421 attttgaaaa tgaaaattgc gagttagtaa agccaaaaac tgccctttta gatgagtata  
39481 tcaagcacia tctttacaat aaagaacaaa gctttgtgat cggcgatcga gatactgata  
39541 tgatcctagc ttcaaattta ggtgttcgtg ggttaaaata cagcgagaat ttgacttggga  
39601 aagagataga agaagaaatt cttaaattcct ttcgcaccgc aagcatttcg cgtatcacta  
39661 aagaaaccaa tatccgtgta aaagtatggt taaatggcag aaagattgct attaatacag  
39721 gagttccttt tttgatcat atgcttgagc aaatcgcagt acatgggggt ataggacttg  
39781 aaatctcttg caagggtgat ttagaaattg atgagcatca tagcgttgaa gatgttgctt  
39841 tagctttagg aagtgccata aaacaagctt taggagataa gataggcatc acaagatatg  
39901 gctttgtctt acctatggat gagtgtttgg caagtgtgc gatcgatttt tgcaaccgct  
39961 cgcatthagt ttataaaagcc aaatthaaaa aggaaaaatt aggcgaatta agtactgaaa  
40021 tgatagaaca ctttttttac tcgctaagct actcaatggg agcgagttta cacttaaagg  
40081 ttaaaggtaa aaacgatcat caciaaagccg aagggtcttt taaagctttt gcaaaagcct  
40141 tgaaaatggc tgtaaaaatc gaaagtgaaa atttagccag ctctaaaggg gtaatatgaa  
40201 actgatcatc atcgatacag catgtgcaaa ttttagcgtc ttgaaattht gtcttgatag  
40261 actaggcttt aatgctaaaa tcagtagaga tthaaaagat ttagaaagtg cggataagct  
40321 ttttttacca ggggtcggaa cagcagcaaa agcaatgagc aatthagaaa gctthaatct  
40381 aacaaattht atcaaaaata ccaaaaaacc cttacttggga atthgcctag gaatgcaaat  
40441 ttttaggggat ttttcagaag aactagatca agaaactcta ggcattatgc cttthaaac  
40501 tcaaaaatth gaacttccaa aagagtattc tttaccgcac atgggggtgga atgaagttgc  
40561 aagctcacac ccactthtta agggthttaa tggagcttat tttatthttg tacacagtha  
40621 tcatgtagta ttaaatgact ataccatagc tacaagtgat tatggggtaa aatthtagcgc  
40681 aagthtagca aaagataatt tttatggcgt acaatthcac cctgaaagaa gtggagaagc  
40741 gggggaaatt ttaatatcaa atthcattaa ggatataaca tgataatccc tgcacttgat  
40801 ttgatcgatg ggcaagtagt acgccttggt aaaggcgatt atgaacaaaa aaaagtatac  
40861 aaatacgatc cthtagaaaa atthtagaaa tacgaaaacg caggagcaac ttggcttcat  
40921 ttagtgatt taagcggagc taaagatcca aataaaagac aacttacct gatagaaaaa  
40981 ttagcaaatg aagtcagtgt caatthgcaa gtgggtggtg gaattcgcac caaagaagag  
41041 atacaagctt tgcttgattg tggagtaaag cgtgtagtga tcggctcttt ggcgattaca  
41101 aatcctacgc tttgtgttga aatthtcaa cattthggaa gcgaagctat cgtthtggca  
41161 cttgatacga tthttaaaga agattatatg atagccatta acgcttggca ggatacagac  
41221 gataaaagac tthtagaggt tthagaatth tataatatca aggtctaaa acacatactt  
41281 tgcactgata tthcaagaga tggcaccatg caaggaagca atgctgaact ttagaactc  
41341 atccataaaa actthcctaa aatthcact caagcaagtg ggggcgtagc gagcttagaa  
41401 gatctthaaa aactcaaggg tathgtagt ggggttatcg taggaaaagc tthattagat  
41461 ggagthttht gcgtagaaga agggataaaa tgcttcaaaa acgcataatt gcatgtthtag  
41521 atgtaaaaga tggtagagta gtaaaggga cacagthtaa aatcataaaa gatatgggag  
41581 atatcgtaga acttgcaag cgttattctc aaagcgggat cgatgagctt gtgtthtatg  
41641 atattgccgc aagcgttaga aaagaacgta tthcaagaga atgggtaagc gaagtggcta  
41701 aaaatatcaa tatcccttht tgcgtggcag gcggtatthaa aagcgaagaa gatgcagccg  
41761 aactthtagc caatggagcg gataaaatth ctatcaactc cctgcttht aacgatccag  
41821 atcttatcac tcgtthtagc aaaagthttg gagtgcaatg cgttgtagtg ggcattgata

41881 gctttaaaga tgaaaatgga aatttaaagg ttttcaaata cacaggtgat gaaaacacta  
41941 gcaaacatag cgggaaaaat acgatcgagt ggattaagga agtgcaggat ttgggtgctg  
42001 gagagatagt tctaaatag atgaatcaag atgggtgttaa aatggatat gatttagaac  
42061 aattaagcct tgcaaaaaaa gaatgcaaag tacctttgat cgcaagcggg ggagcaggaa  
42121 agatggagca ctttttagaa gcctttaaaa tccggagtaga tggggcttta gcagcttctg  
42181 tttttcatca acaaatcatt gatattaaag aattaaaaaa ctacttaaaa acccaaggtg  
42241 taagtataag gatataaaaa tgcaaaattt ccaaaattta aatgaaaaaa tcaattggca  
42301 aaaagtaaag gggcttatcc ctgtcataat acaagatgca aaaagctgtg aagttttaat  
42361 gctaggtttt atggatgaga aagctttaga aaaaagtttg gaaagcaaaa aggtcgtatt  
42421 tttttcgcgt actaaaaatc gtctttggat gaagggtgaa gagagtggaa attttttaa  
42481 tatcgttgat ttaagccttg attgcgataa tgatacactt ttaatttttag ttgatcccat  
42541 aggagctact tgccatatag gcaatatttc ttgctttgaa aatgtatcta aaagtgcaga  
42601 ttttgccttt ttagcaagac tggaaaaact tataaattca cgcaaaaatg cggatgaaaa  
42661 tacctcctat actgcaaagc tttttaaaaa aggaacaaag cgtattgcac aaaaagtcgg  
42721 cgaagaaggt gtggaaactg ccttggcagc aactgttaaa gataaagatg agcttatttg  
42781 cgaggcggct gatttgatgt atcatttaag tgttttactt gcggatgcaa atttaagttt  
42841 ttcagatgtg attgccaac ttaaagaaag acataaagaa taaaattgaa atatcatttt  
42901 aggctttctg atctttttta tctaccctgc attaatgatg tttttcatct taatgcatag  
42961 aaaatatata tctgaagtac caatgttagg tttcataca aacatggaaa tttttaaacg  
43021 agcgagtatt tattatTTTT atttagcaat tatatctctt ttttttagt gtggaaaaaa  
43081 gttatttcaa agatataaag ttttagatttt ataaatactt tttattttgg ggttgctttt  
43141 gtctttgtgt gtttttcttg cttacccttg ctttagatgg gcatttaagc tttagtgcct  
43201 ttgctgtgtg ttgttttagtt ttgtctttgt ttttaattt atttattttt gctttaagaa  
43261 aatttcttat tttacttggaa aaaaacttat ttttataata actacattac taggtatttg  
43321 ttaggttttg gcttataatc ttttttgctt ttattatcaa ctttatattt ttgacaatta  
43381 cgatttttta ggtaaatttt ataatatccc ttcttataaa agacctttga attttatatt  
43441 ttaatgaaaa ataaacaaaa aagcctaaaa ttaggctttt gctgataatt tagagcgaat  
43501 taatgcaaag cttcgtaag cttgatcgct tttttattta agcacactat catcgctccg  
43561 ctgatagagt cttgacggaa atgaagtcca ttttaagcct taagctcgat acccttataa  
43621 atctctttac taaaatcaaa ataaggatta agtttagcaa gctcttcacg atctttaagt  
43681 aaaaattttg ttccttcaag cactgcaatt cccgcatcta cgatacaatt atcacccaaa  
43741 ggaattcctg ttactgaatt tgctcctaaa agacacgctt tgcttactat tatagcattt  
43801 ccacttgttc cgcttaaaac acctaaaatc gatgcaccac cgccacatc agagccttca  
43861 cctacgatag cactcgaact tatacgcctt tcaaccatac aagcccctgt tgttctgcg  
43921 ttaaaattca catagcttgc acctggcatg attgtagtac ctgcagccaa agatgcacc  
43981 attcttacct tagagctttc taaaattctt gtattatctt cagggatgat atgtgctaaa  
44041 aatcttggga atttatccac aaaatcgatt tttggatact gattgctcat ttttaacgc  
44101 atttcgtttt ctcttaaata ctcaagctcg ataggcttat catcactcca agctacattg  
44161 cttaaaagcc caaaagctcc atttaaattt aaacttctta aaggaacttt tttggtagaa  
44221 agcaataaaa gtttcaaata aacactttcc acactcaaag gctctttatc ttcaaaaaga  
44281 caaacaag caaattcatc gtctttaaat ttatctttga taatctttaa aatatcgata  
44341 tttttatgtc cctcttcttc taaaaaaggt ttaaagcaag caagcgcata atcaatatcc  
44401 tcaagcttaa gaatttgtac aaattcactt gcttcaaaat caatctcaac acccctttgc  
44461 ataaaagcct caagcataat cgccgcagaa ccaaaatttt gctcataatt taccaaagca  
44521 aaactggcct gtaaaatttt atttttatta agctgaccac gatcaagtct tgctatacca  
44581 aaagctttag gttttctata tccatttttt tgttcaattt gcttaattaa aagtaaaaaa  
44641 tcttcttttag tgttaataat ctttttttct ctttaaaatt ttaatgcaaa caagcacttt  
44701 ttccattcat cacaggttgg attgcagaat tatctgcgcc gccttcatta ttgatttttt  
44761 ctataaattg ccaatttttt tcagctgcca ttaaataacg ctttgcactt acactttcag  
44821 gatgataaaa acttacaggc tttccttcat ctccgccttc tcttactatc atctctatgg  
44881 gaatttgtgc taaaacttca ctcttgtaag cttttgcat ttcctctgca gtgcctttac  
44941 caaaaatc atactcttg ccattatcag gacataaaaa gccactcata ttttctatca  
45001 caccggcgat tggaatgtga agtttgtaa acatatctaa agctctttta ctatcatcta  
45061 aagaaacggt ttgtggggtg cttacacaaa cgccagcagt aattggaata ctttgtgccg

45121 aagtaatttg cgcattctct gttcctggag gcataatctaa aaataatata tcaagttcag  
45181 gccaaatcac atctgcaagc aattgctcga tagctttcat gatcatagct ccacgccaca  
45241 taagcccttg accttcttcg attaaaacc ccatactcat catataaaca ccatggctta  
45301 aataggctt taatctttgc cctaccactt caggctgagt tttagtttcg cctaaccatcc  
45361 ttgggatatt tggcccataa atatccgcat ctaaaatccc aactcttttt cccatttttag  
45421 ccatagaaat agccaaatth acagtgggtg tagacttacc tactccaccc tttccacttg  
45481 aaacatgat gaaatthttt acttgagggg cgataatthtt accacttctt gaattgcttt  
45541 tttcttcagg aatthtttga gtaatgatat gaatttgtaa attcttcaaa tttaaagaag  
45601 ctaaagctt atcaatattt ttacgtaatt cttcgcttac ttgctggatt gatgaaacaa  
45661 tttcaagctc aacattaaca ttttcattht cgattthttat atctthttaca aaatthaaac  
45721 tcaactatc cttatcaaaa ccaggatatt ttacacttht taatttctct aaaatttgct  
45781 ctttcatctt ttttctthaa cttthtaaaa atcaatttht ctaataaaat gataaaatth  
45841 agctthttat aagtgtataa tatggtaaca ttatatataa atthaattht ataacaaagg  
45901 gaaaaaatgg ctaatcttag cttgattatg ctagcagctg gaaattctac tctgctttgat  
45961 atgggagtaa aaaaacaatt tctacgcctt ggcgatgatc ctttatggct ttatgctacg  
46021 cggaatthta gcactthttt tcctthttaa aaaatagttg ttacttctag taatacttct  
46081 tatatgaaaa aatttgctag aaattatgaa tttgttgaag gtggtgccac tagagcagaa  
46141 tcctthaaaa aagccctaga agccatagat agcgaatttg taatggtaag tgatgtagca  
46201 agatthtttag taagcaaaag cttgtttgat cgtttgattg aaaattttaga taaagcagat  
46261 tgtatcactc cggctthttaa agtcgcagat actacgcttt ttgaaaatga agccttgcaa  
46321 agagaaaaaa tcaaacctcat tcaaacctct caaattctac gcactcactt gctcaaacaa  
46381 gcctthaaatc aaaattttaga tttcacagat gatagcacag ctatatctgc aatgggcgga  
46441 aaaatttggt ttgttgaagg tgaagaaaa actagaaaaa taactthtaa agaagatctt  
46501 aaaaagcttg atthtgcctc accaagcaat gaaatcttht gtggaatgg ttttgatggt  
46561 catgaatthg gagaagaacg ccccttgctt ttaggtggag ttgaaattca tctaccatg  
46621 ggctthaaaag cacacagcga tggagatggt ttagctcact cttthaacga tgcgattttg  
46681 ggtgcagctt gtttaggaga tataggcga cttthtctg atacagatga aaaattthaa  
46741 aatgcaaat ctatgaatct tthaaaagag gcataaaaa gagttaagga gttgggcttt  
46801 gaacttgtaa atgtagacat ttgcgtgatg gcacaaactc caaaactthaa agattthtaa  
46861 gaagccatag ccaaaaatat agcaaatact ctcaatatc atgaatttag agthaaatata  
46921 aaagctacta ctactgaaaa gttaggthtt atagggcgta aagaaggtat ggctgthttta  
46981 gcaagtgcga atthtaaaata ttttgattgg acgaaaaat gaaagthttta attatagaaa  
47041 atgaaattht tctagctcaa agcataagta thaaacttag tgatgtgggt tatagttgctg  
47101 agatcatcaa tctctttgat gagcgtaac ctgaaaaata ttatgatatt atthtacttt  
47161 ctaccaatac tagcaattht thaaaagcag ttacagaatt thaaatagat attattattht  
47221 tacttatttc ttatatcagc acagacacgg tthcaaatc thtaaaactt ggtgcgtgctg  
47281 attatataca aaaacttht atgatagaag aattgatagc aaaaatcaaa cattatcaag  
47341 actthtaaaa gctthtctata ttgaataaag cttataaaag ctatatcaaa tcaagacttg  
47401 aaacagthta aattccagaa tacaactata aaaaatthaa actccccgta gththtaaat  
47461 ctaacaaaca agttcagct gatgccttht gththtaacta tatcaacgaa tacgacatca  
47521 ctctthctta tgttgatcta tctgtgagta atctagtaga aaaagcagat aaactthcaa  
47581 cagaaaacaa tctthtattc ttgagcaatt thcaagthtt aaaaccgcta gagcgtgaaa  
47641 aattacttga atthtatcaa aataaatccg thattthtgc tactaattca aatatagaag  
47701 atthtagaact cccgtgtatc aatctthaat ataataaaaa aatatcgat agthaatcaaa  
47761 ththtaacct agatgaatat gthtaaatata tcaatthtaa thtatcaaat gctthtctg  
47821 atacagatct thcaaagaaa ttaggaatth ctcgtaagtc thtatgggag aaaaggaaaa  
47881 aatatgaaat cagcaaaaaa aaataaaagt atcgthtatag aaaaaatga actaggcatt  
47941 cthtctctta tcaaagaggg thtgccttga agttgcacc atthtaatgga tgaacatgaa  
48001 acaaaacaaa thctthaaac gggtaaatc gataaagaaa gththtctta tctthtgtcc  
48061 thtgcctcaa aaatthcaga agaattcatt aaagacattc gcataaggaag caaaatcgat  
48121 cttatcttht atgatgaaac ggtgggaaat atcacactta aaagcaaat thaaaatgat  
48181 aaaaatthtt ccaatatctt tagcccacat acttgctctt tagataatat gggthgaaat  
48241 tgcactgggt gagaaataga aatthtataat tctacaattc aaaaatcaa agaagaatth  
48301 cataaaacca aagaaaatct taatgccccat aaaattactg cgatagthttc aagctthgat

48361 cctttgcata gagcacatga aagaatgttt cgctggacta tagataaggc ggatttgggtt  
48421 gttgtttttc ttgtagaatc ttttgacgca aatggctttg attttgattt gaaacaaaat  
48481 tatttgaaaa aatttattca aaattatttg ccaccggata gaattttcat cttcccgctt  
48541 aaagatatca atctttttca cgctcattta aatcctagtc tagaaagcat tttagccaag  
48601 agtcttggat gtactaaact tgtcgtaggg caaaatcaca caggacttgg aatgttttat  
48661 gatgataatc aacctaaaac catactagat gatttttcta aagattatga tatagaagtg  
48721 attgtttttac ctgaatttgt attttgcgat gcgtgtcgtg tgatagtaag tactcgatct  
48781 tgccctcatg gatgccatca tcattttacat tataattctc aatccttaaa agaattgtta  
48841 agagcaggta ttataccccc tgctgttttt atgcgaaaag aagtttcaag tattatctta  
48901 tcttctatctt ttctaatcgt atttaaaaaat ttgcaaaaaa tctataatga tcttttcgca  
48961 acagatggaa ttttagaata taaaagcgat gaagaatttt atcaaaaagct tttagaaact  
49021 catcaaagtgt cttatatggt ttgaaaggaa acaatgcaaa aacttttttt aacttttttt  
49081 tactcaggat gtgcaaaaaa agcaccagga acttttggaa ctttagcggc tttgattcct  
49141 gcttttttta tactaaaata cttaggaatc actaccttat ttttactgag tattttgatt  
49201 tttattgcca gtataagagt gatcgatgat tatgaaagaa aaacagggat tcacgatgat  
49261 aaacatatag taattgatga agttgcagga gtttttctag cgtgtgctat cgctgcaagt  
49321 ggcgctaatt ctttactgaa tttttttatg gcctttgtgt ttttccgtat ttttgatctc  
49381 acaaaacctt ctatcatagg aaaaatcgat aaaaaaacca aaggcggact tgggtttatg  
49441 ctagatgata tgctagcagg attgtttgca ggacttttaa gtgcagtgat ttatggtttt  
49501 ttacttaaat tagatttagt cttttgggat aaagacttga taaatttatt ttgaaatttt  
49561 gcttaaatta atatattttt aaattttatt cttatataat ttagtcttta atttcaaaaa  
49621 aggaaaataa atggcaaacc ataaatctgc tgaaaaaaga gcaagacaaa ctatcaaaaa  
49681 aacagaaaga aatagatttt atagaacaag acttaaaaat atcactaaag ctgtaagaga  
49741 agctgctgct aaaaacgata aaaacgctgc taacgaagct ttaaaaatag caaacaaaag  
49801 cattcacgct atggtaagtc gtggatttct taaaaaaca acagcttctc gtcgtgtaag  
49861 tcgcctagct cttctagtaa ataaaattgc ataacttttc ataattttta atgttagcta  
49921 gtaaactaga tcctttttta aaacgctttg aagagttaaa ttctcttctt agtagttctg  
49981 atatcatcag cgatatcagt aaaatgactg cactttctaa agaacaaaag aatttagaac  
50041 ctatcgtctt aaaagctaaa gaatacctaa aaactctaga tagcatagaa gaaaataaaa  
50101 ctctacttaa tgatgctgaa cttggagagc tcgcaaaaga agagttaaaa aatttagaag  
50161 agttaaagcc taagctcgaa gaagaactta aaattttgtt actaccaaa gatccgaatg  
50221 atgaaagaaa tatttttctt gaaattcgtg caggaacggg tggagatgag gcttctttat  
50281 ttgtaggcga tcttgttaaa gcctatgcaa gatatgctga aaatcgtggc tataaacttg  
50341 aaatcgttag ctctagcgaa ggaagtgtag gtggttttaa agaaattatc atgctagtta  
50401 aagggtcggg agcttttca agactgaagt atgaaggtgg aacacatcgc gttcaacgcg  
50461 ttccacaaac cgaatctcaa ggacgcatac acacttctgc tataactata gcggttatgc  
50521 ctgaagtaga tgatatagag atagaaatca accctaataga tcttaagata gatgttatgc  
50581 gctcttcagg acacggagga caaagtgtaa atactactga ttctgctggt agaactcctc  
50641 accttctac aggtatagtt gtagtcaatc aagatggaaa aagtcaacac aaaaataaag  
50701 aaagtgctat gaaagtctta aaagcaagac ttacgaaat gcaagaaagc gaacgcttgg  
50761 cacaagaaag cgaagcaaga aatcccaag taggaagtgg agatagaagc gaacgcatac  
50821 gcacttataa ttttccacaa aatcgcatca gcgaccatcg catcaatctt accctatctc  
50881 gtttggatgc tatttttcaa gatggacttt ttgatgaagt tatcgaacct ttaatagcac  
50941 actatcaagc agaatcatta caagagcaga atttataatt tcattagtct tgaaaacaag  
51001 actaatgatt agtgtttatg cgggaattta tgcgggctac tatttgcacc cacatgggtt  
51061 acattttcat tttctatatc ataagcttgt ccaaaacctt ttacaaaacg acccttttga  
51121 aattcaagtt ttacaagatg aaaatcaagc atattgcgta tagtttttat tccaccttct  
51181 ccacctgttt gtttttcaaa ctcatcataa attttatcaa acatttccc acgctcgata  
51241 aaactagcct tgaccctata acgcaatctt ttacgaagta taacagaagc tgccttgctc  
51301 tcactctcta aaaacattat ttctatattg tttggatttt ctttgatatt attaaaatgc  
51361 tacttactt cactgatata aatataattt ccccatgaag tatttcaaaa tggcgcataa  
51421 gaacaaacca cttccttatc cgcattttaa gtcgctaaag aaaccgaatt aaagctcaac  
51481 ataaactctt ttgcttcttt tgctacccca ctaagatcct ttttagtctt tgcactcata  
51541 caaagtgcaa taatagcatc ttttaagagt tcttcatttg ctttttttagg aaattctatg

51601 cgtaaatttt cattatcatt ataagctata tctaagccct caaaatcaac tccgaccaat  
51661 cttacttctt taggatcttt cactgctcca aatTTTTTtac aaagatcgat caaattagat  
51721 tgatggatgat cattcatatg agaaataata ctttcaaaac tcattTTTTta ccctttcttt  
51781 aatTTTTtata gaataaaata tcaagctaaa aatgggatca attatcaaatt taaaaaggac  
51841 ttaaaaagac taaaatcatt taaatTTTcaa aaatTTtattc taatTTtaagt tgataaagga  
51901 taaatTTTTct cttcaaatat tatgatatat attatcatta tttatTTTTat ttaacaagga  
51961 gtgaaaattt gaatccgagc aagagagttt tgaagctatc tttgctagta tttttattaa  
52021 atactagtat caatgcacaa gaattaaatg ataattttca aatgcaaaaa gttgTTgtaa  
52081 gtgcaacagg atTTgaacaa gatgcggata ataacttacg caatgtgatt gttattgatg  
52141 gcaaagactt agaaaaaaga ggatttaata ctttagaaca agctctagaa agaatttcag  
52201 gcattagttt tgtaaatttt ggactaggac gcaatatcga tatgcgtgga caaggaagca  
52261 aatccaatat agctgtgaaa gttatggtaa atggaaatgc tatcaatgtc cttgataatt  
52321 ctcatgggtgt aaccctttta gaaagtatca atctaaacaa tatagaacgc atagaaatca  
52381 taccaggggg aggctctgta ctttatggaa atggcactag aggcggtgtg attaatatca  
52441 tcacaaaaaa agaaaaatcc gatgcttttg ctctaaatct taaaggcagt agttacgatc  
52501 atggaaattt aggaggaaat ttaggggttt atggggctaa aaaaatcaat gattatctaa  
52561 catttggttt tgatatacaa ggctTTaacc gcgatggcta tcaagaaggc tacaatcaaa  
52621 aaggctatTT tgccaataca aaagcctatc taaacactag tgataatagc gatttaacc  
52681 taaattataa ttatTTtgaa agcaaaaaata caagcagtgg ttatcttaca aaagcacaag  
52741 ttcaaagcga cccaacccaa aaaggaaata gtgataatat cactcaaatc aatagacctg  
52801 aaatcgcttt agattatcat cactatTTta gtgatttata tgaaattcaa ctcgagcat  
52861 tttggcaaaa tcaaaaaata agatatctaa aagatgaaat tccaatgatg ggcaccatag  
52921 cttatcaaac tggtagtgggt tttgaagata cacttacagg tatcaattta aaaaataaaa  
52981 tcaattataa agatgattct tattttatct ttggttatga gtttgcaaat catgatgcca  
53041 aaagaacaag catagttcat tataatgttc cagtaattca aatgagtcac accatgacaa  
53101 ccctaatgga tatggataag caaagccatt ctatTTTTgc tctagactct catcaattta  
53161 atgatatttt tagtatttca ggtggggcaa gatacgaata cagtctttat gataccata  
53221 gaaattacac aagtaaaatg ataatgggtg gtagaccact accaagcaat ccagagcttt  
53281 ttgacactga tgatacaagc aataactttg ctcttgaaat cactccaaat ttcaaatatt  
53341 ctgatactgg aaatatatat gctaaatacg aaagaggttt catctctcca actcctgcac  
53401 aacttgTcaa taaagatcaa gcaaatcaaa aatattacac tgccaattta gatcctgaaa  
53461 tttttgatac ctttgaactt gggattaatg atTTTTggtg ggattTTTTat ggttttaatt  
53521 tgactttctt ttacactcta agcaaggatg aaatTTctta tcttgGaaat ccacatgcta  
53581 caggaggggc atTTtgGaaa tactacaata tCGaccaaac gcgtcgtTTa ggggcggagt  
53641 taaccttag tcaatTTTTa ttcagtgata gtttaatcct caaagaaagc ctaagctatc  
53701 ttgatgctaa aatTTctaaa ggtgtcaatg atggacttag aattccttat gtttcaaaaa  
53761 taaaagccac agccggagta gaatacgctt ggaataaaaa tttctcaagc tatatagatc  
53821 taagctatTT ttcaagagca aaagatggcg gagttgTTga tgaaaataca ggaaagatgt  
53881 ctagaaattc ttggattaag gattatTTTT taacggatat tgggtgTaaat tataattata  
53941 gaaatttaca aatTTtagca ggcattcGca atctTTTTga caagcaatat tacacttatc  
54001 aagatagtat aatgatgag tatctagctg gaaatggcag aaattactat gttgaattta  
54061 aatatgcgtt ctaaaaattt agtgattata gggctTTTT tagcctatat aatcacctgt  
54121 atcatcgcac tttgTTtagg agatgaaaat ttaagcccta aagaacttct ctctatgct  
54181 tttggcGaaa atgaaatttt gcgtcaaatc atcatagatg ggcgTTtgcc tcgtattata  
54241 atggctatTT taatcggtat gctTTtagct agcagtggag cagtaacgca aatgtatTT  
54301 tcaaacccca tagcagatcc ttatattata ggcatagctt cagcggcaac ctttgatct  
54361 gttttagcgt atTTgtTaaa actgcctgat tattattatg gaatTTtagg ctttgTTgt  
54421 tctgccattt tttcattagc gatctTTaaa gtatctTcaa aagcttccat agctactTTa  
54481 ctcatcatag gcatcgcagc ttcattcttt ctaggagctt ttacctcatt ttttacctat  
54541 cttatagggg aagattcttt taaaatagtc gcttgGctta tgggaaatat aggttcagct  
54601 tcttggtttc gtataggaat tttgattttg ctttgattt tttgtctttt gtatttttac  
54661 gcacataaaa atgaattaaa tatcattTTa agtggagatg atgaggcaag aaatTTtagga  
54721 gttgatgccc aaaaattaaa aatcaatctt ttgatagtct cttctTTtagc ggtttctttt  
54781 gcagtagctt ttacaggact tatagccttt gtaggactta taataccaca tactgtaaga

54841 ctcttgctta gaaattatga caatgctttg gttattcctt tttgtaccgc ttttggaggg  
54901 ctttttttac tcatttgcga tactctagca agaactctaa tagcccctgt gcaaattccc  
54961 ataggagttt taaccgcatt ctttggagct cctgtatfff tatacttggc ttttaagtgt  
55021 aggagatttt tatgatatta aagatacaaa atttaagttt tagctatcat aaaaaagaat  
55081 tgtaaaaaaa tatcaattta gagcttcaaa ataaagcttt tataggattt ttagggccca  
55141 atggttcagg taaaagcacg cttttaagc ttatacttaa gaatttaaat ataagcaagg  
55201 gcgaaatatic gctttttaat accgatataa aaaacttttc ctttaaagaa tttgcacaac  
55261 tttgcggttt tgtacctcaa aattcgggtt taaacacacc cttaaaagtt attgatgtgc  
55321 ttttgatgag caaatttaca aatttaaaac atgctttttg tgattattct aaagaagata  
55381 ttttagaagt tgaaaatttt gcaaaaactt taaaattgga aaacttttta gaaagaaata  
55441 tactttcttt aagtgggtgga gaatttcaaa gagtgctttt agcaagagct ttgcttaaaa  
55501 aaccctaaat tcttttttta gatgaacca cttcagccct tgatttaaac catgctatcg  
55561 agcttttaag ctttgcgaa agattgataa aacaaaacaa tatcgcagtt gtagcgattt  
55621 tgcattgattt aaatttagcc tctatgtttt gcgataaggt attgttttta aaagaaggag  
55681 aaataaagta ttttggagc acaaaagagc tttttacca agaaattcta aaagaaattt  
55741 acaatttaaa ttgcgagatt gtctataaag acttaaaacc ttatatctta gccttaaaagg  
55801 aaaaaatatg aaaaaattt taatcattat gagtttattt ttaaccctac tcaatgccaa  
55861 agaacgcatt gtagtgcttg atcctgcaag catagaaaca ctttttatgc taaatgcaca  
55921 agatcaaatc gtaggtattg caaatttgca acactcaaat atctaccctg aagaaaaaac  
55981 ttcaaaaata actagcgtag gaactttttc acacccttct cttgaaaaaa tagttgcctt  
56041 aaagccaagc ttagtgatat taagctcgta ttcttttaaat ttagaagaag ggcttaaaaa  
56101 ctttggaaac aaaagtatca atttaaaagc ccaacgcctt gatgaaatca aaaacaatat  
56161 acaaatctta gcgaactca caaacaaga agagcaaggc aagaaacttt tagaagaatt  
56221 tgaacaagga ttgcaagaat tgcaaaaaaa tcccttaaat aaaagtggaa tttaccttta  
56281 ttctagcaac ccactcatgg cttttaatga taattcttta atagcagata tattaagact  
56341 cataggcatt aaaaacctaa gccctcaaag cgaaatagca cgccctataa tatcagcaga  
56401 atacattcta aaacaaaatc ctgatttatt gatcttaggc ataatgcag atggcaacat  
56461 tttagatacc aatgctttgt taaaaaatac aaaagcagcc caaatgggac aaatttatca  
56521 caataaaaac acccatatat tgttacgctt aagcccaaaa atcatagata gaattaaaga  
56581 atttaaaaca agattagaaa atcaaaattt ttaatcactc aatcttgttt taaaaattc  
56641 acagctttga caaagctttt ctatacgtt attttcttca aaggcctttt tgatttcttg  
56701 aatgcgttta gaatcaagaa ggctcttaaa ttcagcattg aaaacattac ccaagggtat  
56761 atcacctga gtatccaac aacaaggcac gagcgtgccg tcacttaaaa tgcctatttg  
56821 ctcttttaaa gcatggcatt ttccttgagt ataaaggggt ttatctttta aacttggcca  
56881 tttaaaaagc ttgttttgat gaagtaaaat atgcctttga agacgatttt tagccaaatg  
56941 tgtaagaatt tgaaccccaa attctttact taaaaattca taaataggca aattttcact  
57001 aggagcttta aaatcagtat ctaaattcca aagtctaaga ttgataaagc ttggtttttt  
57061 atactctaaa tgctctttgc aaaactctaa aataggctta aaatattggt ccaaagaaag  
57121 cttattttgg cttaaaaaag ccattaaaga gatattgatt tgatggatat tgtcatattt  
57181 taataataat ttagaatttt taggactaaa ataaaagcca cttgtagtaa tttctaattt  
57241 catttgatga ttttagcaa tttgcaata ttcttctaaa ttatttaaaa gcaaaggatc  
57301 gcccaaaaga tgaaaagtaa aaatttcgct tttatcccaa atttgctttg cgagtttaga  
57361 aaaattttct acactcatca ctccacgcaa ggcttttttt gaaggacaaa aatcacattt  
57421 taaaccacaa atatcgctta attctatgta taatttttta aatttcatca tatatccaag  
57481 agtatttttt tagcaatatt taaaaaatag attaaaataa gtaacatttt atacatattt  
57541 ttatatattt tttaattatt ttatatactt tcaaaaacttt taaataaaat ccacattata  
57601 cttgaaaaaa ttaaaacttt aaaatgaagg aaatttcatg caagaactta ctgagcgaa  
57661 aaaaattcgt tccattgtag ctgcaagcag cggaaattta gtagaatggg tcgattttta  
57721 tatttatgcc tttacagcaa cttattttgc tcatactttt tcaacttctg ataatcctat  
57781 cgtgcaacaa atcaatgctt ttggagtctt tgctgcagga tttttcatgc gtcctatagg  
57841 atcttggctt tttggttctt tagctgataa ggtgggtcgt aaaaaatcca tggttgtatc  
57901 tgtggtttta atggctttgg gctcttttat gatagcagct ttacctagta aagatgtggg  
57961 gggggatttt gctattatct tgcttttact tgcaagactt atacaaggat tgagtgtagg  
58021 cggagaatac ggcatagcag cgacctatct ttccgaactt gccaccgaag gcaagcgggg

58081 tttttactct tctttccaat acgtaaccct cataggcgga cagcttttag cagtagctag  
58141 tattagtata atgcttttct tttttagtat tgatgaaatg aaagattatg catggagaat  
58201 actttttgtt gtgggtggaa ttttagctct tggctctctt cttgtgcgta aagtgatgaa  
58261 tgaaagcgcg acacaaattc acaaacatga tgatagaggg acgcttaaag ctttatttac  
58321 aagctcttgg aaacaatttt taatggtgct tggtatcacc gcaggtggat ctttggcatt  
58381 ttatactatc actacctata ccaaaacttt tatggaaaat tcaggtatgg ataaaact  
58441 ggtaataat ctttttttag gtgctttatt tatacttatg attatacaac cgctttttgg  
58501 atatatcggc gataagatag gacataagcg atccttgatc atcttttgta ttttagcctt  
58561 tgtaggaatt tatcctatct tcaatcttat atcaagcaat gctcaaagca attcctcttt  
58621 ggtatttatc ttagtagtgc ttttatttat tattctaagt ttttacactt cagtggctgg  
58681 aatttttaaa gccaaacttt ttcctgaaca tgtaagagcc ttaggcacgg gcttgggcta  
58741 tgcgatatct aatgctatct ttggaggatc tgcaccttgg gtggccttac aatttaaaaa  
58801 tgcaggaatg gaaaatggct tttttgtcta tattgctgtg cttactctac ttatgtttat  
58861 agcaactttg tgcctgccta aaaaatcaga gcttaattag ccttaaagcc tttaaagaaa  
58921 gtatcgaaag tgcggtactt tctaattctt ttaagctttt aaattgataa tttttatttt  
58981 cctcttttaa aatttgatga taaactttaa tgtttaattt atactttgta taattatgtt  
59041 taaattctcc caaaaatttc atatttttag aaatttcacc ctctcttct ttaaaaaaag  
59101 gaaaattata cataccctta taaagtttat cttgactttt ttgtatggca aattttttgc  
59161 cccattcaaa tataaaaaga ttttaagcttg cattctcgtg agatattttt ttagccttag  
59221 gataaagctc tgtgttaaat ttaccttggc aaaaatcata caagggacaa attccacatt  
59281 ttgcattttt gctcacacat attaaagcac ctatatcaag taaggcttgg ttatgattaa  
59341 aagcatcttc caaatttaaa agctccttag ctttctttc aagctcgttc atttttggat  
59401 tttccaaggc aaaaaggcgt gaaagcacgc ggcgtatatt gccatcaaca aaagaaactt  
59461 tttgatcgta agcaaaaaca gcaatggcac ctgcagtata agctcctata ccacttaatt  
59521 tttttaattc atcaagtttt ttaggcaatt taccttcaaa tttatctaca cattctaagg  
59581 ctgacttttt taaatttcta gcacgagtat aatacccaag cccctgcaa gcttttaaaa  
59641 gctcgtcttc atttgcctta gccaaacttt gcaaggtagg aaatttttgt aaaaaaggaa  
59701 aataaaacct ctctaaaact gattttactt gagtttgctg gagcataatt tcaactgatat  
59761 aaaccata agctctatca atatctttta atctttcatc acaatctttg ctttgcaaat  
59821 tacgccatgg caaatttttg cgtccatttt tatcatacca aagaagtaat ttaacttgta  
59881 agtcttgaat catttgtttt tgcattgagtt agagtataac aaaaattgca taaaaattta  
59941 caatgtatta tagtgatatt ttaataatta aaatcaaaaa tcattttata aatttatata  
60001 aaaaatccca ttttacatac aatacaaagc tataaataat aaaaatataa aaataaatat  
60061 aacttaata taaattcaaa taaaaataa aaaagcaaga caatatcatt attttaaaag  
60121 cttaattta gaataaaata tttaaaatac atttttaatt ttcaaaatta tattctttgt  
60181 tataattatt taaatcagta tttttaaacg catttaaagg gctaaatcaa tggatcatca  
60241 caagctaatt cccctttggg atgagcgcta taatatcaac catcaaaaaa tcgataccca  
60301 gcaccaaaga ctctttgaac ttgcggcaca agttgaaaat gcggttttta aatttgttaa  
60361 acgcatgaa ttaaaagaaa ttttaaccga actttttacc tacatgaaag agcattttca  
60421 tgatgaggaa gaatttatgc aagaaattcg atatccacgc ctttatgagc ataagcaaat  
60481 gcataaaaat atcgtgcatg aatgtctca attgatacaa aatataaaat ccacaaatga  
60541 tttaaaagaa aaactatact ctatcatgtc caattggctc tctaggcata ttttaagcca  
60601 tgatgttatg attattgctt gggtaaatga gaatttaaaa aaagatgaaa ataaaact  
60661 tgagttaa at gatttgccac caaaacaaat tctaacacag gaggaaaatt ttgaatttat  
60721 ctattcttgt ctttgcaaga tagatcatag gttaagtttt aaagagcatg aaagtattgc  
60781 taatgaaggc aagattatga gatgtaaaaa atgtcaagag cttttatttt ttattagaag  
60841 ccaagaaaaa acttataaag gataaagctt gcttcaaaaa tgggataaaa tctatagcgt  
60901 tcataatggc aaaatagaca atcaacacaa aaagcttttt gaacttgcag ccaaggttga  
60961 acatatattt gataagcccg ttcatagaga tgaattaaa gctttactta cagatttttt  
61021 caactatatg aaataccatt ttgatgatga agaaaaatat atgcaattca ttcgttatcc  
61081 ggactttgaa aggcatcgcc aaatccacaa agaaatcatc caatccatga taaaaattat  
61141 tcaaaaatata aaaaccacca atgacctaaa agaaaaactt tatattatgg taaaaaatg  
61201 gcttttagaa cacatacttt atgaagatat gagagtagaa caatggagaa tagggctttt  
61261 aagctctgaa aatggagctg atatcacttt tgaagagatt aaagatgatg aagaagaggc

61321 tgtaatttat ttttatgctt gtgagtgc ataggacaaatt catgatgtgc cttcaggaat  
61381 tcacaaaaaa atacaaaatg aaggtgcaaa atttaagtgt aaaaaatgca aatttccttt  
61441 agaatttttc aaaaaaggat attagttttt atatttattt tgctacaatt atttaatttt  
61501 tattaagga taaagaaatg ttagcatttt ttaaaggctt agggatagga tttttatgct  
61561 tgggtccttt tatagctgga gtgattttta atgtagaatt tttaaataaa aacaaaacta  
61621 ctcaaacctt aaatttttca agaagtatag aaacaagtat ggaagctaaa cctgatattt  
61681 ttcgtgcaaa tatcaacttt tgggcaaatg aaaatttaag cacccaaacc tttttaagca  
61741 atgaagacaa aattcaaatt tccaatactt ttaatcaaat tttagaacgc tccaaaaaag  
61801 agaatttttg cagtgggtgga agtttctcgc ttgaacctaa tttttcttat aaagacggag  
61861 tccaaactcc taaaggacaa agacttcatg caaatttaga atgtgagttt aaagcggaca  
61921 agctagagga ttttaacaaa cttttaaatg atttaaactc aatcattgca aaaagtgaat  
61981 ttataggtat ttctacacct gctttagagc ctaaattctc aaaacaaacc ctaaagaca  
62041 ataaagaaaa actttatagc gaacttctaa aaaaagctta ttcttatgaa aacatttatt  
62101 ctttagatct taacaaaact tgtatattaa aaaatctaaa tattgaatca attccaaatt  
62161 tttatccaag ggcttttaat agtatgaaaa gtgctgataa tatggagctt tccttaccta  
62221 taataaaaga tgaagagcaa agcattagtg gcaactgctt atttatttgc aagtaatcaa  
62281 agcaaaataa actcatttta agtttatttt gctagaattt catctttagc tttcgcggga  
62341 atagctcagg ggtagagcac aaccttgcca aggttgggggt cgcgagttcg aatctcgttt  
62401 cccgctccat taatcacccg cccgggtggt ggaattggta gacacaaggg acttaaaatc  
62461 cctcgggaatt tttcttccgt gccggttcaa gtccggcctc gggcaccact ttttctaaaa  
62521 aattatcagg gcgacatagc caagcggtaa ggcatgggcc tgcaaagcct tgatctccgg  
62581 ttcgaatccg gatgtcgcct ccaaaaaagg caattaattt ttacaacttc aattcgggag  
62641 atggctgagt ggtcgaagc gccggtcctg aaaaccgttg agggtcacac ctccaggggt  
62701 tcgaatccct ttctcccggc cactttttga aatttttcat tagtttaaca aactctgtta  
62761 tgataaattg atttgatcta aaattaagga aatcaattta tgaaaaaatt catcttaatc  
62821 tcactatac tttcatcttt ttttgtattt acccaagcaa gcgaactgcc aggcgatgaa  
62881 atccaacccg aagtaaaagc tatcaaagaa cattttaagg acaaagtaga aaaggtagaa  
62941 tttgaagcat gggcaaaagg tatgggttta aacttctcaa ctcaaaaata tcttaacaat  
63001 caaaactata aaaaatatgc taaaactatg gcaaaactca ttagaaaaac aagaggagtt  
63061 aagggaaagg ttgaaatttg ttatgaagga acgcctcaaa aacgagttca taaatgcaat  
63121 aaattttaat tcctgactta aattaatatac ataaaaattt ttaagttttt ttcactataa  
63181 aaaagctaca atttcttaat tataatcat taaggaaaag gcatgtttta aattgttttg  
63241 ctcatatcaa taatctttgg cttaaagct tgcaaaggag aggatatgaa taacaatgaa  
63301 gataccaata aagatattaa aacagtctat gcgcctaag ctgtgggcat agatcttaac  
63361 acaaaaacca atgaattttt atttaataca cgaaaaaaac ccacaggcaa atacactaaa  
63421 gaatacacca aagccctttt agaagctgtc aatatagtcg ataattccc ttataaaaaa  
63481 ttttatgagc ctaaataatt agatcctgaa tttcacacag ggcaaaaatc cactctaata  
63541 gaatttaaag aatggcaaag catatattta aaagatcctg ttaaaggaag cttagctcct  
63601 tggaccaaaag cagaaaaagc ttattataat tctttagatg gagaaggaag gtataattat  
63661 ttagtaaaaa gaagtggctt agtatgtact cctatagatc taaaagatag tgccttaata  
63721 agacctaaaa gacctaaaga aaaaagattt ataaatgctt ataaagaagg tatgaaagat  
63781 tataaagaag ctaagagact agattataaa ggatatgatc tttttcaaaa agccattaag  
63841 aatttaagct atgcttatga agagggtaaa gattataaag caggacttgc tttagcagaa  
63901 cttggatatt caaaagatta ttttagagcc attataggta aattagacca agatgaaac  
63961 aatgaagttt tattggataa actaatcaat gaatttttaa atgctaatta tagaagcata  
64021 aggatttatg aagagcttat agaaaagtat gacttagggg atgcttattg gggtttatat  
64081 gtttattctc gtaaaataga agatacagta tttgatgata gattttattt tgctcagctt  
64141 aaagatagca gtgaagagct ttataaaaaat gcttttgaac atggagctta tggagctttt  
64201 ggtgctaagg caaatactat atattctgat ttaattgcag gagaatatca actttgctta  
64261 ggtatattgg gcaataaaaa ggctttttat gaagcaagct gtatatctta gtgattctgg  
64321 tttaaaatca agagcctttc aagctctttg gcttggagtg caattaggag atgaaaagtg  
64381 tttagaagga ttgtatcatc ctttatatgg aatacatgaa aaccctttaa aaagacaact  
64441 catgaaagac tttgctaaaa atcctcctta tgataaatac ggaatgcttc ctttcttaga  
64501 tgagttaatc tctacagaat ggattataga tccaaatgaa tataatttta tttatgatat



64561 taataataga gtagtgacgg caatgctaaa tggaatcgat aagggtaaat ataaagatcc  
64621 aagagatgtg gattctactc ctgaaagtag atgggaatth gaccaagaaa tagatgctta  
64681 taaagaaggt tctgtaagaa gttatagtta tgatttgccc aatcactgga gcgaagcaga  
64741 tgtagaaatt tatttagaag agctttatth acatgctaaa ctgcgagccc tcactcctcc  
64801 tcaaggctat cctaagcgc caagatacta tagccctgaa aggttagaat ttatctatga  
64861 aaaacataaa ctagacgcta aacttgatcc tagaatccct gctatataca gagctaath  
64921 tcctgaagag cttagagcta agataagagc ttttgctaaa gagcatggaa tagaggaatg  
64981 aatgaaaaa tttttatag aatthtagcat taaatgaagc ttggaaatat cagthttta  
65041 cctaccctaa tcctgctgta ggttgctgta tactagataa aatgaaaaa atthtagcca  
65101 taaaagccca tgaaaaagca ggatgtgctc atgcagaatt aatgctata gcccatgctt  
65161 ttacaagtht aaaccctgaa atthcattac ctcaagaagc aatgctgatg catgaathta  
65221 thtgcaagaa tcatagaggt atththaaag atagcatagc cthtgthacg cthgaaacct  
65281 gctctcatca aggaaaaaca cctccttgth ctaaacttht tagcgagctt ggctthtaaga  
65341 aagthththt cagthththaa gatgagaatg agatthgcaag caaaggtgca gathththta  
65401 aaaaacaagg agthggagatt gaaththggcg thgctthgaaga tgaaggaaaa aaactththaa  
65461 aacctththt aaaatggcaa aaagggcaat thaaacttht caaactthgccc ththctatga  
65521 atggctcgcc ththggaaaa atcgthaaag atgagcthaag thgthacttht gcgcataaaa  
65581 thcgthccgt gathgathth cthgthgthg gaggaghaac gataaghaaa gatcgthccta  
65641 tactthgatg aagactthg c aaaggcaagg cgcccaatct thgtatctta agthcatcaca  
65701 atthtaghaaa ththgacaaa agcathcctt thththaatg acctcatcgc caaththata  
65761 ctcatathcc thaaatggct aaathththaa thgtatgaagg thgggghaaat thththaaaa  
65821 atthcaaha tgaaatggat atgthththga thththcaag thcaagthth aatgatghaa  
65881 ahaatgthac aatgthctth aaaththhaag cactththtag aaathththth gggagthgaca  
65941 cthtaggcat thtagagctt tagthggath ththththgcaa ghaatgath aagaththt  
66001 ahaataghaa aghaaaacga aatcaaatct ththththata aagaththac gthtagcaagc  
66061 thcaagatg agcthaath aaacaacgaa atctththth atcaagthth ghaaghaaat  
66121 thaththaaag ahaatgatga aathththaat thcaaththg gcaaaaaaat catactththt  
66181 aghaaththc thcaaaatag thgathathth gctghaagcaa aaththhaaca agthctthgctt  
66241 thaaactthth thathththagc gathgthath ththgcaagct thggctgccc caatghatht  
66301 gthgcccacg atctthgthth ththgatgath thgctthgthg thththgthth gggthathcatt  
66361 aacctthgct tactthththaa acaaththcgt atctthaaaa gthththgcaa agaaghaatg  
66421 aagghathth thaaaccaaag aatghaaaaa thacacaaaga aathhaacaaa athactthaa  
66481 ththththaaa aathththct thhaaagthg thgcaagthaa atctthgac actgthththth  
66541 aaththgthg aagthccgct aaagaagth thththathth athathcata thctthgccc  
66601 ththcatacat agththctat acctcatcaa gactgactat agghaathgath thgctgthca  
66661 thgcccathct agctgcactg atggctthth thgctccaaa agcgtthctt thcaatacatg  
66721 gaaththgac caaaccctc acgggathcac aagthagthc thaatgatg thcaththgca  
66781 ththcagcagc aththaaagc thhaaagcgt thagthcctha aaccgthgccc athgctcctg  
66841 thgcccathga actthgcactg cthaththcag cthgacaacc thgctcctgccc cgcathatac  
66901 thgcaathth cththaaaaa gaaccthth gcaathgctac thathhaaat thgaththgctt  
66961 ththcatcath ahaaccthth gthathgath thagathhaag cathaacgca gghaathactg  
67021 cahaagctcc athtagthgga gcagththcaa cththgctc actthgathc ththcagcaa  
67081 thagcaathg gththaaagag athhaaatcaa thaatcccat agghathgca gthcaththaa  
67141 cctththctt aagccctth gctctacgct thhaagthgag thththccggt ahaathctt  
67201 cgththggatg thgthaccath thathactth cthgathcac ththcaath ththgacath  
67261 acgathctt thctthctth gthathgath gcaactcata thththaaag agththggcca  
67321 aathcccaat thctthththca caaagththc aggctthgct thgaththth agctctath  
67381 cthgththth cththctgct thgggaththc cthththct cthththcaat thcgcagccc  
67441 thhaaacaaha accaccgct athagathg aagththctg athccagath thcaaghaaat  
67501 cathhaaagc thgaththg ataccathth cathgcaagg caaaaaatct thgahhaaaa  
67561 thhaathctt thcataath aathgagct cthththccc gcaathgath atctthccc  
67621 thgthggthg athththath actthctth gthathgctg actcaathth thgaththct  
67681 aagcathth gcccacaaath acggctthth cactthhaat cctththgct gthhaagath  
67741 aagagccath aghaathgath thgaththth caathththth thathththth gcaaththth

67801 tacaaaataa atttcctgca agcataggtc ctaaagtatg cgatgatgaa ggacctacac  
67861 ctatttttaa aatattttaa ttactcattc gctacacctt aaaaagtata aattacgggtg  
67921 ataattgtta aaacacctgt aacaaaaaca aaagcatcta aagctttatt ttggaatfff  
67981 ttcatttttg aaaccgtata aattgcaata attggcatta aaaataagat tgctgcgata  
68041 attggaccgc ctaaactttc aataaaaact aaaatactag gattgatata agcagtaatt  
68101 agcataataa tatacataac taaagttgaa caaatagcaa tttttttcaa atcaggattt  
68161 tcactacctg ctaatttgca acattttcct actataccat aagcaccctc tctagcacca  
68221 aaataatgtc caaaaaatga actagaaatc gctaaaaatg caatcaatgg accaccatag  
68281 gaaataaaaag gattatcaag cttatttgca aaataagaaa gcacagggtat attttgtgct  
68341 ctagcttcat taagctctgc aggacttaaa gaaagtacgc aagatatcac aaaaaacata  
68401 acgaaaaaga gtagcattgt agaagttcta aataaaatff gatcagctff ttctacggca  
68461 tgttctttgt attgtctfff tacacttaaa gaaaaagtag aaatagcggg cgagtgatta  
68521 aaagaaaaca caaaaccgg caaagtcagc cacactatag taataaattc ttttacccca  
68581 ggaatagcac taaagctfff aaacgacct tgtgggataa gatataaaga aatataaat  
68641 aaaatagcac acaaaggata cacaagccat tcacacactt tagtaatcaa ttcttacta  
68701 aaaagcatga taagcataaa aatacttacc aaaataaaag ctaaaagcaa gcgataaaaa  
68761 gggataaac tcgctacaac ttttctffa tcatctgcmc ttacctcata catagcacga  
68821 atgatatccg caatacacc ctctgaatff aaaagaggta aaaattgatg atagataaaa  
68881 cttcaaaaag tattggttat acccacaaa tacgctaaac aaattggaaa aatagcaag  
68941 aaataaagca cagaaataaa aatactcacc cctctaccaa aatattcctc agcagcatga  
69001 gtaatgtcct tatcattacc atttgcttgg cttacaaaac ggcttaaagc tctatgactt  
69061 agataaacca ttggaaaaat aatcacagcc attgcaataa cggccaaaa accaccaca  
69121 cctgccttaa taggcaaaaa taatatccc gcacccacag cggttccaaa aagagataaa  
69181 acccatctcg tgcataacg agtccactta ggagtattca tacatfffcc ttaaaatttg  
69241 atatcgcaa ataaagctta ttttaacaca cttaccaagc aaaaaatcta aattcctagc  
69301 atfffctff aatttatgta acatfffgta aaatattagt cttatfaaaa ttatattffa  
69361 agatttaatt caagtaagtt ttgaagatgg ttttttatat aaaaaacat attggattaa  
69421 caagagaaa ttttaaaact catftaaaaa tttggaaaca taaagtctc aaatttacat  
69481 gctftfaaaa ttaataatca aatfffgtc ctaagatatt accctgtgca tcagtataaa  
69541 ttttaattg attgcttaat tcaaatttat atccgttgat ttctttgctt acttctatga  
69601 tttgagcatt tgacgaagca ctgattfff gcataatatt tggtaaaatg ctatftggta  
69661 gagctftgta ttttccatct acatctffcc actctccagt gataataaag tcaatftctg  
69721 ttcatcatt taaagtcaca tcataagaat ctatatctff ttttactaaa gcaatftgtg  
69781 ctgftftaaa atctttgat ataaaatctt gtgcattftc tggaaagttca ctcgcaggaa  
69841 caattatatt tctagcaaaa agcaccgtag cacccaataa agccgctaaa cctaattffa  
69901 atftcattff ttctcctfff tgtttgtgtt ttggttgaga gaagftaac ttatctftgt  
69961 gaagtgaatg tgaactaaa aaataatfff taaactctca ttttcaacgc ctatgccttg  
70021 actfttctta aaagaaagta ttctaccatc ttcaaattff aaagtatcat tatctfttaa  
70081 agftaaatca taagftfaaa tatgcaaaat aatgtcatac aaagtgaaga aaagctctft  
70141 ttcttctata tttgcatcac aaacctcaag ctctaattfa tcgaaatftc taagaccata  
70201 ggtataggca ttattgccat tatcacctgg ataaacgctt acataaatcc aattataaac  
70261 aggcaagcga ttatcttcta gcattfttgc atfttctata taaaacttag gctctaaaac  
70321 aactctcct gtataaaatc ccaaagcatg cttatcttgc aaacacacag atgatatttg  
70381 agtaaaaagt ttagcttgat ctaatfffgt ttactctga cttaaaacgg atataagaag  
70441 atgtgctffa tgtftttggg tttgctctaa agcatctff cacataaagt taaaattagc  
70501 ataattctt gcttctgtgt tgggtatggg atftftaatc aaatftaaag taatgagcat  
70561 atftftfaaa gaaaaatca ctccatcttg agftaaaatft tcatcgcaa tccatatac  
70621 aaaatcatct tcgagtatct tftftaattt caaaaaatca aacttgctt catcaagaag  
70681 acaaaaagaa ataaaattat gattftcttg catgctfttc cttagggtt aaagtattfa  
70741 aaaaattata acftaaatft ttaagccaaa ggcttgtgaa attatgatta tftfaaaaat  
70801 tatgataatt aatattfaatt ataatfttat tfttattgta gtataatcmc caaaatftaa  
70861 tcaaattatg gagftaaaga tggaaatfff aaaagattat attgatftaa ttatctftat  
70921 aatfttagga gttatggcat ttatagctft ttgggtcmcga attgaaagag tattatftft  
70981 tagaaaaata gattftfaaa attatgaaaa tcaagagcaa tftgatgatg caattagcga

71041 gaatttaact accatttata tcattttattc taatgctcct tacataggac ttttaggaac  
71101 tgttgtagga attatgatca ctttttacga aatgggaata gcaggaaata tagatgttaa  
71161 atccatagtc gtaggacttt ctttagctct taaagccaca gctttaggac ttttagtcgc  
71221 tatacctgcc ttaatggctt ataatgcctt gcttcgtaag gtttcacttt taagcaatgc  
71281 ttataaggta agtaaaaatg cttaaactac ctaaaaatga agggttaaat atagtctctt  
71341 tcatagatat aatgcttggtt ttacttgcta tcattcttag tatttcaact ttcattgctc  
71401 atggcaaaat tgaaatcaat ctaccggtta gcgaaaatgc tctaagtctt aacaatgatg  
71461 aaaaaaatt atccattagc attgatgaaa acaatatttt ctatctagac gataagacta  
71521 cagatttaaa aggccttaagt gatgccattt cttcgcttca taaaaaaccc atagtggaaat  
71581 taaaaagcga taaaaatgca aaatttgaaa gctttgttca aatcattgat ttattaaaag  
71641 ctaaagagca tgagaatttc caaattataa cagagaaaaa tagatgaaaa atgctttgtc  
71701 aatcacaaa tcacaagctt tttatatatc ctttttattt ttcctacctc tagctttttt  
71761 actttttaat tctgccaatt tttttaaaat agaatttaaa agtgaagata gctttacttt  
71821 ggcgatgaag caattcactc aaaatcaacc aacccaaact ccacctatac cgacaaattc  
71881 tgagcctata cagcatcata aacccaaacc tataaaacaa cctattaaaa aaactaaaaa  
71941 ggcagccgaa aaccaagtaa aacctataca agcgatcaat cctatacaaa aaagtacacc  
72001 attcatagct caaacccata caactcacia tcaagcttta aaaaattccg atgcaaagcc  
72061 tactcaactt acctatggta aagataatca ccctgcatta gaaaaaattc aaaaagctat  
72121 catggaacaa gcaagaaaaa actatccaag acaagcaaga aaaatgctga tgcaaggcgt  
72181 tgtggagggtg gaatttttat ggaaagaaaa caaaagctta gcagaattaa aaatcattca  
72241 aagttctggg cacaatttat tggataaaaag tgcttttagaa agtatacgca aggcttcggc  
72301 tttttttcct tattatcaaa gcgatctaag gatagttttg cctatagtgt ataatttaaa  
72361 agcgtgattt aaatcaattt agtaattctt aatatcta atttttaaat ttttactc  
72421 ttttatccac aaatatggct tcattgttac ctatttgcac cattaaatct ttttttaaat  
72481 tttgctctaa attccctaaa gacttatttt gaagttcttc aaaaatttgt ggattacttg  
72541 cttaagttt ggcttgctca tctgcactta gggcacttag tcctttttct ttggcgattt  
72601 caagcaaatc tttaacgtct ttttcatctt ttttctttt gatttttacc tcatcgttt  
72661 catcactttt ttgcggatct gtgattttgg tagcatccgc acttccgccc gatgcatttt  
72721 ttatatctct taaaatatct gttaaacttt ctttttttac atcaaattca ttgatatttc  
72781 catcaaaatt cacatctttt tctatggcaa aattaagtct agtttgcaaa tttgactta  
72841 agcttaattc atcttcacct ttaaaagcta aattttgcat actttcaaat aaggtatttt  
72901 tatgaaattt cacattgata tgatttgact cttctttatt atttaatgaa tttggattaa  
72961 aaaactcgct gcttattttt tcaaaccaat tagcaataaa ttcattagct tcgccattaa  
73021 gccttatagt tccatcatct ctagcgatat aatttgtaaa agaaccaaaa tgactttgta  
73081 aatttttata attttcatca ctgattttta aagccataag ttcaccttgt ttgttttcaa  
73141 aaaccacttt aaaacctgaa atttgattat ctgaaatatc atttactttg actttttcct  
73201 gctcttcttt ttttaattct aaaatttctt tacgatttgt aatattttga gaacttggt  
73261 aagaaacatt aaaatcattt attgttaatt tatccataat aactccttag aaattttaaa  
73321 attggacttg tttattttat ttacaagctg caaataagcc caaacgacac gcttgtcttt  
73381 tatgttgggt aggcaaagaa ttgcattggt tcaatcttat ttcataatca acgcaagaat  
73441 ttctaacctg tgagttttta ttattattct cagttttgcc ataagcaaaa gaattaacaa  
73501 aacaagcaac cagtgcaata aaaagtaatt ttctcatagc aaagctcaa aaaataaaaa  
73561 tattttataa tcacaatctt aaaattattt gatacaatta caaatttgat atcgacaaaa  
73621 aatcaaattt atttatacta aaaaaattaa atttaaaaaa ggaatacaaa tgaagcatt  
73681 agcccttttt agtggcggac ttgatagtat gcttgcgatg aaacttatca cttcacagg  
73741 cattgaagta aaggctctaa atattaatat aggccttgga agcacaagcg ataaaagtga  
73801 aatcatgaaa aagcgtgccg caatggtagg tgcggatttt gaaatgatag atgtaagaaa  
73861 ttcgtatttg caaaaagtgc tttttaatcc acaatacggc tatggaaagc attttaacc  
73921 ctgtatagac tgccacgctt ttatgtttta aactgcactt tcaatgctaa aagaagaaaa  
73981 tgcaagcttt atcataacag gtgaagtttt aggacaacgc cctatgagcc aaagagggtga  
74041 tgcgatggct aaggttaaaa aactggcttt agatgaggaa gacttgatac ttcgtcctat  
74101 gtgtgcaaaa aatttgcctt taaccaagcc tgaaagagaa ggttgggtgg atagagaaaa  
74161 gcttgaaggt attagcggaa gaagtcgtaa aagacaactc gaacttgcag ctaaatttgg  
74221 tttagaagac tttgaaagtc ctgggtggagg atgcttgctc acacttgata gttttgctaa

74281 aaaaattcgc gactttatag aatttgataa agatatgcaa gtaaattgatg cacaactttt  
74341 aaaatatgga cgccatttaa gactgcctaa tggagctaaa atgatcatag gtagaaatga  
74401 attagaaaat gagctactaa gaaatthaaa aacacctaaa tatgaagtga tagaacttgg  
74461 agatttaatc ggagcttatt ctttacttag cgcaaatgca gatgaaaaag atttagaact  
74521 tgccttaaaa attgctctaa cttacaccaa gcatgaagca aacaaaagct atgagcttcg  
74581 atttaaaaat caaaactata aaagcatagc ttttgaagac aaaaaagaaa tcaatccatt  
74641 tttcatttct taagcttaga aaaatacaga agccctgaga taaataggaa tcgtttcgct  
74701 tggcatatta gaagatttat gcagggcttt agaagctggt aaatttaagg aaagatgatt  
74761 taaattatat ctaaaaccaa aagcgacacc agctaaaaag tctttattgg gcaaaagata  
74821 atccctacca taaccatata ccaatccaac aaaaggctct aatgctctta gatatttagg  
74881 tgcattttaa aattgcaaat aaatcgattt gttactatat gctccataat caagagcagc  
74941 ggagctttct ttaaatcccc taactgtgta ttcattaccg attaaaaatt tatcagcata  
75001 caataaggat tcattagaat aactcgcacc cgagctgttt tgatataaaa atgctaggcc  
75061 atcatttgca taaaaacttt tttgatagct taaattaaaa ttgactttgt taaattcgat  
75121 tttatataaa gaatctttag aatctttttt agaaccctaaa aatggaattc ctttttcgta  
75181 ttctaaattt aaaaacaaaa atccacaaa tgccagcgtt gaatactcaa ccccgctagc  
75241 aatacttgaa tacctgccac ttgagctttc taaacgaaaa ttatcaatct cattaacatc  
75301 atctttaatg cctaaattag cataaattga aaatttatcc ttacttgtgc gatgtaaaat  
75361 cttttttaac ataattttat gtcttaagct tgtatctgta tttttataa aagaattatc  
75421 atatccctca atcatattta tattatcact atattgcata gaataagaca attgataact  
75481 ctgtataggt aaggtataat ttgctacata aacattttct cgctcttgac tcatatcttt  
75541 taacaatcct ttgataaaac caaagcgtat ggaatcgttt aggttgaaaa tattacttaa  
75601 agaaaagata gcgctagcct tatattctcc tttagcttta tagccactat tatcaaagtc  
75661 taatatcaaa tcaggtggct ttgattgaag atttataaat atatcagaat aaccataatt  
75721 ttactggct ttaacagcaa ttttaacatc tcttgacca ttgtttaaat tttctatgcc  
75781 tgtatctaaa tcgtaaatat tgaatttatc gccctttttt aaaggcatac caaaatctaa  
75841 tcttgttgta ttattatccc cattaagata tacctcccct acaaaacat attttaaact  
75901 aagaaaaagt atatcgcgtt cttgattaat cccatcaata gttacgctag aagttgaata  
75961 acccttgaa acgataaaat ttgtaagctc tttaatcata ttgtagatat cactgacact  
76021 taaaggctga ttaatgtatt tttttaaaat attattcggt tgcatagtca atgtatcggt  
76081 tttcttaaat tgaatttggt tgaaaatata aattttatct tcagaatctt gattttctaa  
76141 atacacatcc ttttcttgct gttgcttttt ttccaattca tcaaattctt tttgtatatg  
76201 taattgctgt tgtcttttat ctagtaaatt aagcgttttt gcagagtcac ctgcttgcca  
76261 taagcagata aaactcataa gcaaaaaaat aatttttaaa aatctcacct atagccttgt  
76321 agtttggtg ctttcattga tataaggccc atctgattta gaaggttggt ttgatgggtg  
76381 attagaagta gaattagatc cagtaacctt gcttatccca tttttatatt tagagattga  
76441 agaattaaga tttatagtac ctctgcccc agaattgatct tgcgtatctg tggatatttg  
76501 agtatctgta cttataccat gatttttggt attgtttata ttgatattga ctgcagaatt  
76561 cacaccgct gtcttatcga tatgatcatc tatatcaacc actcccccaa agctttgatt  
76621 tgttccaccg cttaatctta tcgtagcccc atcgcttttt tcatagacac ttactttaga  
76681 atttgtaact tttccatcaa caagtaaatt tcctttttga ctatcagaat ttaaaattcc  
76741 cccttgcaaa tttaaatttc cattaacatg gccattgatt tcatttgctg cactgatacc  
76801 actttgagtt gtaacagatg ttttatctgt tttagcatat cctatgcca aagtgctgc  
76861 aacacttcct gtaacaagat gattgcttga taagcctcca gttcctgaca catttaataa  
76921 agcactatat ttttgagaat taagactatc agctaaagaa tttacttcca aatttcacc  
76981 cacatttaaa atagcatcat tagaagcttt aacattggct ccattgagtg caaaatcttt  
77041 acctgtgttg atattgacat tatttgcatt taaattcggt ttagtaaatt tcgtttcatt  
77101 tgttttagaa tgtgatgcac ttacaaagcc ctcaatactt tcaccacag ttccaccatc  
77161 aactgcatgg tatcctgcag tttgtttggt tgttgctgca atttccaaag aagaactaga  
77221 agaagaattt ttagattttg cagcatttaa gataacatta tcttttgctt cgatattaat  
77281 gctattagcc ttagcttcca ctccatttaa aacaatactt cttttgtgc tttctaaatt  
77341 taaattaccg cctgcattga ttttagaaat attctcacta gaactttggc ttttatcttg  
77401 attgaattta aaacctagag tttgattaga agtagtattt atgagattgt tgctaaatat  
77461 attagcagtg ttggctaaag cttgagaagc tactattcca taatttacac ctaaattttc

77521 attttagca gctgcatttt gagctgattg attgatagca gaagctatag gactagtagc  
77581 ttcgattcct tctttaatat acaaaccaaa gcctgtagtg ctttgtgttt tagtatcttc  
77641 atatttagtg ctagcaatct ctcctgctct taaattaata tccttactag cctcaaaatt  
77701 agctccgcct atgtctaaag cattgtttgc attgatatta atatttgaac ctttaattgt  
77761 atttgaaaca taagaaagct catcacttat ttttccagtt ttagaaaatt ccaaccaac  
77821 ctctgcagtt cctaaaagat cagatcttac tccaccttgt gtgatactat tagagctatt  
77881 tgtggatttg gcatttgctt tatcttgcac aaaactataa tttacagcaa cccatttcc  
77941 ggtaattctt aaattagcat tagcaaaaac tccaaaagct aatgaatcac tttctgtgtg  
78001 gattttattt tgtgcggtta taaaatcaac cttatcagct tgaatatcaa tctgcctcc  
78061 attaagctca cttcctttaa tgcttacatt ttttgagca tttaaattca aattatcggg  
78121 ttgaatttgc gatgaagata ctaaagaagc atcagtattt acagaacttt gcttatatcc  
78181 agcaatggaa cttgttgaag aatgagaaga gcttgaaatt ttattttctc cattttctat  
78241 tgtgatattt tctccattta aattagcaga tttatccgct tgtaaagttg agcctgtgat  
78301 tgctatattg ccattgggat taatattaat atcacctttt gaatttaaag tactgcttat  
78361 tgattttgaa gtttctaaat tagcactttc ataactgatc tctacgggtt ttaaatacac  
78421 accatcgggt ttagtcttgc taagctcgtg tgcatcttta atattaacat tgttagcatt  
78481 gatatctatt ttagaatcag cattgatatt gctagctata atatttacet cttgattgga  
78541 aacaattcct acatttgctc ctttgatatt ggtgcttaaa accccatcta tactcgttgt  
78601 agtattggat tttgactat ctgtattaat ttgttcaaat gaagatgatt tagaataatc  
78661 attttgata tttacatcgc cttttgaga tataagaaca attttgaat cattcgcact  
78721 agtagaaata tcaacttttt ttatgtttaa atcatttacc gaatcaatat tcacaacatt  
78781 atttgcttta atttctcctt tttgaattga attataagag cttttttcat ctatacctaa  
78841 aacagtgtct atattgacat tattggcact taaatttata ttttgcgcat ttaaattaga  
78901 actttgcaa ttaatctcat tgccagcatt gatattaatc tgaccctctg aagttatacc  
78961 acttaataaa gaattaaatg attgtgtatt aatatctatg cctgtttttc ctgtaagatt  
79021 tgattttatt tcattatttg caattgtctc tttagaaaga tacaacatag gggccatgat  
79081 atttttacc tttgtttgga ttgttacata taaaatcata tcttgatcaa cagcttgatt  
79141 tttagccaaa cttgtccta aatttaagcc attttcattg gcgtattttg ctccattttc  
79201 aagtaatttt ttaatttctt cttcgttaa tttagtattg gattgtagtg catttgcata  
79261 cattgcatta ataagctgat tttcaaaaaa aggatctcct attactataa attcatcaaa  
79321 attcttattt ttaaattgat ttaaaatgtt taaaaatcca aaatactcac tttcatctat  
79381 gatggaagta tttgtagtgt attcataagt aatgttattg tttgttttat tttcaagagt  
79441 aaacaaacc gaattaataa gatcaggtat agaattttaa attaaatcct gactatttgt  
79501 agcttttttt aatccgaat caactaaggc aaagttttta tccaaagaac tgactaaatc  
79561 ttgattgat tctttagcat taagatctaa tttaccattt gaagcaatag cagcctcgga  
79621 ttttgcttta aaaacaatct ttgcatcaag attccactct ttttgatcag gaacaaatct  
79681 ttttgaagca taatcactgc caacaataa agaaaaatat tggtttaaag ctgaattttt  
79741 agctgctgca tctttaagtg cattccacgc agattctctt tgatgatctt ttgcttgagt  
79801 ggtagaaaaa tatttcaaag catcaagcaa actttcacga tctacaaaat aataagttga  
79861 atttgtattc caagaacca gatattcttc ggcaaaaaat ccattaacc taatttgctc  
79921 taaaacttcc ctacagaaa tttctttact taaagattta ttgtctatat ttcaaaaaga  
79981 tacaatattg cttgggcaa gaatttttcc gctgttgttg atttgtctag cattatcttg  
80041 tgattgagta ttgatattta tatctttgcc tgcttggata gaagcttgct tgctatctaa  
80101 taggttatta tattttacaa tacctgtaac ccctacttcc atattccatc gtttaaaagc  
80161 agtatacca tatcctactt gacaaaacc ttgagcatac tcagtcaaaa tctctaaatt  
80221 gcctgttaaa tttgcattat tattttagaat atttgcttcg atatttagat ctttatctgc  
80281 aaaaattaaa gcattattat gaatcgtatg ggcgtttaa tacaagttat ttaagctatt  
80341 aaaagtagaa ttatttgtaa gtgtttagtc ttgggctcta aatcaccat ttgaaaataa  
80401 ataagcatca tttacaagat tttcatccgc atgaagattt aattcttttc cgctagcgac  
80461 aagattttta acataaatat ttttcgcatc aagatctatt gaagaagcat tttcgagttt  
80521 tgaattgata tttaaatcat tcaagctttt tatatgaagt aaattttgtg cgtataaatt  
80581 tccatgattt aaagtcaaat ctttgtttagc ttgtatttga atatcttttt ggcttaaaat  
80641 tttgccatta ttcacaaaag catcatcatt aagcgttaag cttatatctt tatttgctga  
80701 aatttctcct tgattatcaa aagaatttgt atcaacttta atatcattta aagcattgat

80761 aaagccaaaa ttgctagttt tatctagggt atttaaagct aaattgtctg cataaatttt  
80821 tgagttttct tcatttatat caaaaatata ttttgtctct tggctaaagt ttacttgttt  
80881 tgcattttca aaattattgg cattgatttg aatttgcttt cttttataaa gtccttcatt  
80941 agtaactttt ccacttgctt ttaaataaat attatccgca ttgattaaag aggttttaat  
81001 gtcttttagca tctattttta cacttccatt tgaatttaca cctatagctt gaaattcagc  
81061 cttatctttt acttttacta taacatcttc gattccgcgt attactccac tatgtcttac  
81121 gccaacgccc tcttctgtgc taataagagt aactgtattt gcatacatag atcccaaata  
81181 cttcccatca ataccatagt caattttttc atctttttgt tttgaagcaa caatttttgg  
81241 tgcattttgg gtgcttaaat ctactttgtt aagtccggct ataaaattga tatcggatag  
81301 gtttttacca ctttgatagt gagcaatgct acctgcaaga tcaatcccac ggctgattac  
81361 attaaaataa tccccatcaa ccattacccc cttttctcca atagccacc tgccattact  
81421 cgttacttct gtaaaatctc cattaatatt acccgtaata agcgtaaccc ctttagtatt  
81481 taaaaaagct gctccattta cactaaaacc attttcatta gcaaaaatta aatttagcact  
81541 ttttccaaat acctcaacag caccattgat actagaagct tgcttgcttg aaatttcatt  
81601 gatgatggta ttagcatttt gttttaaatt tggatttttc cctaccatc caccaatttg  
81661 agaatttcca tcttttaaac tattattaaa aattactcca tcttggacac tgaattcatc  
81721 aaattgattg tgtgatactc ctttttgatt tggatttttg atattaatca catctgtttt  
81781 attgcttgat tgtgtaagat ctgctgttct tgaacaatg acattacat ttctttgacg  
81841 caaatctgct gagaacaata cgcaaggaaa taaagcgcca agaagcggtta aattcaacga  
81901 taaacgaaca attttctttt tattaatctc catcaatccc tccttgtaat atttttaatc  
81961 attttaatat taaaatggta atttttctca atatttttaa ttaatactaa aaaaatccta  
82021 aataaaaatt ctttttttac acatttaaaa taaaaataat attaatttgt ttttttaaaa  
82081 ttacccaaat atataaaaat aaatgttaag aaatttatag aagagacgat atggagttaa  
82141 atcttttcaa aatattgcaa attaaagccc aaaaaagggc ttttagtatta ttttactcca  
82201 taagcatttt ttaaattggt taaattagca ctgcatgaa gcaataaaca atcagccaaa  
82261 accaaacgca ccatagcact cactactaca ctacctcaa gcctacaca aggatcatgt  
82321 ctgcctttga gttcaaattc taaatcattt ccgaatttat ccatctgct ttgctttaaa  
82381 aaaatagaag gagtgggttt aaaataagtc tttaaaataa gatcttgtcc atttgaaata  
82441 cctcctaaaa tccctccgct gtgattactt aaaaattcac ccccttttaa agcatcatta  
82501 ttttgcgagc ctgcattttt actcgcattt ataccctgc ctatctcaac agcttttaca  
82561 gcattaattc ccattaaggc atgagctaata ttagaatcta atttatcata aagcatttct  
82621 ccaagtcca caagcattcc cttagcccta gtataaacag aagcaccac gctatctttt  
82681 gaatttctag cacctaaaat ttcattttta aattcatctt ctaaattagg atctaagcaa  
82741 aaaatctcac tttgttttgc aaattcaaaa tccaattctt cctcttttaa atttgaaaca  
82801 aatcttccca ctccaaaaac cccactttga acacaaatat caaattcacg caaaagcata  
82861 gcagcaacag caccgcggc cactctagca acactttctc tagcactagc tcttccgctt  
82921 cctctgtgat ctcttatgcc gtatttatga aaataagtaa aatcagcatg agcaggacga  
82981 aataaatctt ttaaattatc ataatcctta gaatgtgcat tttcattaaa tacaaccata  
83041 gcaataggat gaccgtagt atagccttca aataccctgc ttaaaacctg caccttatcg  
83101 ctttctttt ttggagttgc aaatttgctt ccgcccttac gcttatcaag ttcgctttgc  
83161 aaaaaatcct catcaatatt aacaccgcg ggcattccat cgatcacgca acccaccgcc  
83221 gctccgtgag attctccaaa acttgtaaat tttaatcttg taccaaaagt attcactata  
83281 aagctcctaa ttttcaagt gtaatttttg ctgccatttg ctgtgcttct tttttatttc  
83341 ctgcaatggc tcttgcaagc tcttgtccat taaggattaa agcgatttca aattgtttta  
83401 aatgatcagg cccaaaagca cgcacggttt catattgtgg agtttgcctt aattttgctt  
83461 gtgtaatttc ttgcaatttt gttttataat ctttaatgag aatttttgca tcaatttggtg  
83521 ggaagttttt ttctatgagt tttaaagcga tattttttgc aaaatcaaat cctgcttcta  
83581 aatgtatagc tcctataatc gcttctaaag catcagaaag tatagatggc ttttctttac  
83641 ctccattggt ttcttcagcc gcactcataa aaataaaatc gcccaaattt aaactatttg  
83701 caatctttgc aaaagatttt tcattaacta aagccgctct taattttgac aaatcccctt  
83761 cagcgtcttt agcaaattta tgaaaaagat attcgcccac aaccaaatca agcaccgcat  
83821 cgcctaagaa ttccaaacgc tcattattgt aaggttttttt aaaactttta tgagttagag  
83881 catggattaa aagatcttta tctttgaaat tataggctaa tttttgttct aataattcaa  
83941 tatttttcat ctttttccct tgcaattttt aaagcagctt cgcgcgctaa agtatcacac

84001 ctttcatttt ccaaagcccc attatgtgct tttacccaat aagctttttat cttatgaggt  
84061 tttgccatat tgatatattc tttccataaa tctacatttt ttttaccctt gaaatctttt  
84121 tttatccaag cttctaacca ttcattaatg ctttgaacca tcaaattaga gtccgtaaaa  
84181 agtgaaattt cacaaggttc ttttaaagct tttaaagcct cgataatcgc ttttagttcc  
84241 attctattgt ttgtagtatt agcctctgct ccaaaacctt ctttttgatg ttgattatag  
84301 cgtaagatat aagcccatcc tccaaaacct ggatttttaa gacaagaacc atctgtataa  
84361 atttcaatat gtctcattat ttttcacttc ataaatgatt tgacaagtat taaattcata  
84421 acaaacagga caatgataaa aaaataaagg cattacactt ttacactctg tacaacgata  
84481 tgaaaattca agtcttgctt taaaggaatt gtcttttaaa atttttaaca ttttaaaatt  
84541 ggaattttta aaaactatat ctttaggctt ttcatcttct atcaaacca aagcataaaa  
84601 aaattcaaaa tattctttat tttgcaaatt aaaagcttta ttttccttat aaagcaaatc  
84661 acaataactc gaaaaatctt gatttaaaaa aatgatgat ttttcaaaaa ccaagcgtcc  
84721 tagcatagaa ttattgtcta tttgtagctt taaaatgtgt tctttttttt cttcatcact  
84781 taaactagaa gcaagaaaat ccaaggcttt taaaaattct ttttcttctt ttacattttc  
84841 tccaagttca acaaacagc ccaaaagctc caaattttcc ttatgttttc ttaatttaag  
84901 ataaacaatt tttaaaagct ttagagtttg tatatttctg ggtcgaattt ttaaagcttg  
84961 caacaaaact tcctttgcac gctctaaaaa ccctgcttta aatataactt ttgccaatgc  
85021 gaaaaagata aattcacgct cttgcttgct cttacttttt tcaagggcga taagataaat  
85081 ttgcgtggcc ttttcaaatt caccactttt ggtaaaaatt tcagccaaaa aactcaaatt  
85141 tccaaaactc aaaccttcat ttctcaacaa atctttatgg atattatcca tctcaaattt  
85201 ttaataaat ttttcaagct tttgctcttc atctttactc gcaaatactt tccaaatata  
85261 atttgccaca gctacaacga agattaaaac agttaaaatt ataagcccca ctaagggatc  
85321 tctatattct acgaagaaaa aatccatcat cctgctctaa aaaattttat gccaaattat  
85381 agctaaatct ttgtataatt ttatttaagg ttttaaaatg ataactaaag aaagtataga  
85441 aaatttatcc caaagactta atattgttga tattattgaa aattatatcg aagtaaaaaa  
85501 acaaggttcg agctttgttt gtgtatgcc ttttcacgca gataaaaacc cttctatgca  
85561 tataaatcct acaaaaaggat tttatcattg ttttgcatgt aaagcaggag gagatgcttt  
85621 taaatttgta atggattatg aaaaattaag ttttgctgat gcagttgaaa aagtcgcaaa  
85681 tctttgtaat tttaccctaa gctacaccaa agaaaaaat gaaaataaaa aagaactaag  
85741 aactatacta cccagcctca atgcttattt taaatccaat ctcaaacc accataaagaagc  
85801 tttggattat ctatataaaa gaatgctaaa tgatcaagat atagccaaat ttgaattagg  
85861 ttttgaggc tcaagcgagg atagtataag attgtttcat aatgaaaaaa tccctttaga  
85921 agatgctatg agtgtaggtg ctttaaaaaa ggatgaaaat aatgaatttt atgcaagttt  
85981 tatatggcgt atcacttttc caatttatga tcataaagac ttattagtag gttttggagg  
86041 gcgtacttta aatcctaatt tcgcagcaaa atatgtgaat tctcccaaaa atatattatt  
86101 tgataaaagt agaatttttt atgcttttaa tatagccaaa gaaaatatag ccaaaaaaaa  
86161 agaaatgata gtatgcgaag gctatatgga tgctatagct tttcataaag caggttttaa  
86221 caatgccgta gcagtccttg ggacagcatt aactgaaaat catctgcctt tgatccgtcg  
86281 ttatgaggct aaagtgattt tatgttttga taatgatgaa gcaggactaa atgcagccac  
86341 tcgttcggct tttttactta gcactcataa aatagatggc aaagtagccc ttttagaagg  
86401 tggaaaagat cctgccgaac ttgttgccaa caaccaagc gcaaaacttc ataccctact  
86461 tgaaaagggt atggatttgg gggagtttta cattagacgc atactttcaa gcttttcttt  
86521 aaattccgcc ctagataaac aaaaagccct tgaaaatata caaaaatata ctttagcct  
86581 tgaacccttg gtagctagtt cctatgtaag tttggtttca aaactcttgg gtgtagatga  
86641 aaaactcatc gttcttagct caaatcaaaa gtcaaataaa actatcgatt ttaacgcctc  
86701 tttccagcaa acgcaaaatc ataatcctaa atcccacatc accgaacttg agctcttaaa  
86761 ttatttaaaa aacaatccta acacacacga gctttttata aagatcggcg atattagatg  
86821 ttttaaacat agggattat tagaaaaaat tttagaacac aaaagctacg aagatagatga  
86881 tataagagaa tttgaaagta aaaattttag taaagattta agccaaattg aattcttgtg  
86941 ggggatttgc aaggtgaatc tagccttttt aaatcatatc aatatcaaaa ctccttatct  
87001 tgcttttaaaa aaacaaatct ttactcttat agaaaaaat tttactcttc ttagtaaaaa  
87061 tttaaacgat tatgagctta tagggttttt gaaagagaat ttgtttttac taaaaaatga  
87121 aaaagatgaa gagaaactag aagctttatt taaaaatttg catagatttt tttctgctaa  
87181 aaatttggat attaaaattt taaaaaacia ttctgaaatt gattacaatg aagaaccctt

87241 ttaagcttca tttagaaaa taacgaaaa actatccgat ttaccttttt ttaaacacaa  
87301 tcacgctaaa gtatagaaaa atttattaag gatataattat gatgcctttt agcgatgaag  
87361 agcttataaa tcctgtaaaa gcaagtttag ataaaagtat gcctatgtta gaacgcgatg  
87421 gaggcggctct tgaattttta gggattaaaa atgggtgtgt ttatgttcat ttaattgggg  
87481 cttgcaaagg atgcgcttca agtggaacga cattaaaata cggacttgaa agacaactta  
87541 aaatcgatat acatccagaa attactatag tcaatctaaa tggcggagct gaagattttg  
87601 caaaattata aaaaacttgg aatcgagcat tttttacgca aagactttaa aacagcaaaa  
87661 atatatTTTT ctttagctta tgaaaaacgc aaaaacaagc gtttgTTTT ca ttttatcact  
87721 ctttgtgatt tagctttaaa atctccaaaa gaagcatttt tactttttga attttattta  
87781 gagcattatc aaattaaaa tattgataaa gatttagaag aaattttaca caccgtagaa  
87841 cttaaaaacg aaaaaaatgc cgatgaagca gaaaatgaaa ttcaagaagc ccatgcttta  
87901 aactataaag attttctaaa aagtgaagag cagatcggct ttaaaaaaag ttttgaaaat  
87961 attatacata gcacaaaatt agtcattgat aatcgtgat atttcttaga ctttttagaa  
88021 aaattgcttg ataatggtta taaagatata actttaaact atatagaaag cgttatgcca  
88081 cacttttggg caaatgaacg ctttataaaa ctccaagaaa aacttatagg atttaaaagt  
88141 gaaattaaag cttgatcact cttttatcac cgacaatacc ttagaatgcg aaaaagattg  
88201 ctttttctta aaaactgcac aaaatatgaa tttttctagt aaagctctag aaaaaggTgc  
88261 aaaaattatc gatgtagaag aatgcaaaaa actcttaaag atcgatgaaa atatcaaaat  
88321 catagggatt acaggaacca atggcaaaac cactaccgca gcggtatttt attcgatttt  
88381 gcttgactta ggTTTTaagt gtggactttg tggcactcgt ggagccttta tcaatgatga  
88441 acaaattgat gaaaaatctc taaccacttc acccatttta aaaactttag aatatttaca  
88501 acttgccacg caaaaaaaat gtgatttttt catcatggaa gtcagctcac atgcttttagt  
88561 gcaaaatcgc atcgaaggct taaattttgc agccaaaatt tttaccaata tcaactcaaga  
88621 tcatttagat tttcatggca attttgaaaa ttacaaagca gcaaaagagc tcttttttac  
88681 cgatgagagt ttaaaattta tcaacaaaga tgccttaatg attaaattta atgtgcgcaa  
88741 tgcttttact tatggcatag aaaatccttc tttgtatcaa gtttaaggctt attcctttaga  
88801 agatggcatc aatgctattg tggcattaaa agatcaaagt tttcatatcg actctccctt  
88861 gctaggactt tttaatcttt acaatcttct agccgctagt gcttgtgtta atgaacttgt  
88921 aaagccgat ttaaaagact tagaaaaagc tatcagtggc tttgggtggg tttgtggtag  
88981 ggttgagcaa gtagccaatg gtgtaatcgt agattttgct cacactcctg atggatttga  
89041 aaaagtactt gatacactca aaaataaaaa acttatagtg gtttttggag cagggtggaga  
89101 tagggataaa accaaacgac ctttaatggg aaaaatcgtt gaacattttg caaaaatagc  
89161 cattatcaca agcgacaatc cacgcagtga agagcctaaa gatatcatga atgaaattct  
89221 atcaggcttt caaaccttg ataaagcttt gatgatagaa gatagaaaag aagctataaa  
89281 taaagcttta aaacttaaag aaaaagacga tttagtagtt attttaggca aggggtgatga  
89341 aaatacccaa gaaatcaaag gggtaaaata ccttttagc gataaagcaa ttgtaaatga  
89401 aattttaaaa aatcaaggat aataaatgtt tgaaaatag gatttttcta agatgggaga  
89461 acttttaaat caagttcaag aaaaggcaa aaatatcgaa ttagaattgg ccaatcgaga  
89521 atttagtgtc aaaagcggag caggacttgt gaaagtcagt gctaattggca aggggtgatg  
89581 tatcgatgtt agcattgatg attctttact tgaagataaa gaatctttgc aaattttact  
89641 catttctgct atcaatgatg ttttagctat ggtagcgc aaatcgaacaa gcttagccag  
89701 tgatgtttta ggaggatttg ggaaattatg aaatttttgt tttttttagt agccttttta  
89761 gtatctctaa gtgcaatcga gcgtcctaaa tttgaagatt ttgctgcagg ctatgaaaga  
89821 aataaagcca gcatgctcaa ttatgaagga atgcccgctt ttgccctgag tgaaaattta  
89881 cttgcggttt taaaacagcc taatgctaaa ctcaataaat atgtaaaata tgatccattt  
89941 ttaaatcttt atcttgaag aactgatttt agcttaatcc ctacacctat gggcgatgaa  
90001 gaaaaactta cgcgtaacga ttggatagga atttgggatc ctaatagagc ctatataggt  
90061 cacatcaaat accttgcaaa aaatattgat gaaaaagatc agcttgattt ttctacaaaa  
90121 gtaggacttt taggcactcc ttgctgcgaa atgatgggaa ttgctgctcaa taatagctct  
90181 tttataggaa atcgcatttt aaaacatttt atgaaatata atgatgtgta ttggggcgac  
90241 ataggggttg attttgcagt gcgtgaaaat aaaatttatg tgaataatgt tcgaaaaagt  
90301 gggcaatttc taatcaacga tgaaatcata agcgtagatg gaacaccttt taaagatata  
90361 agaaaagctaa atgaaaaaat tctctttgca gatcgcggaa gcacacttta ttttcaagta  
90421 ttgcgagata atgtggattt aaatatttct actgaagttt ttgccaagaa ttttaagcaa



90481 tttaatcttc cgagtaataa accaaaacca aaaccaacaa gttttagaag caatataggt  
90541 ctaagcgtca attcaagtct tgtagttaca agagttgatg caggctccaa agctgcttta  
90601 gcaggattta tggtaggaga taaaattttg cgcgcaaaca atgtgatatt aaaagatttt  
90661 aaagaacttc aaaccctact tggcacagga aatgatttta atattttaat cgaacgcaaa  
90721 agtgataaac ttcctttatc aggattaaac aatgatttag gaggagtcca ttcaggtgga  
90781 gatggaaaat ttcaatTTTT cataaggcct gtgaagtgaa agaactcttt atcaaacatt  
90841 tagaaaatca tctgccaaaa gttcaaagct tccatccttt tttcaatgaa gccttagcgg  
90901 tgatgttaag ggcgggCGGG aagcactttc gcgccaact tttacttggc attgtagaag  
90961 caaaaatgcc aagtcttata ccaaagctc taaacgcggc tttggcatta gaatttatcc  
91021 acacctactc actcatacac gatgatttgc ctgctatgga taatgcagat tttagaagag  
91081 gaactcctac tttacacaaa acttatgatg aaaccacggc tatttttagt ggcatgctt  
91141 taaactactga agctTTTTTg cttttatcta atttaaattt aaaagaaagc attaaaatca  
91201 atctgattag aactctagct tttaacgcag ggcttaatgg tatgatttta ggtcaagcaa  
91261 ttgattgtta ttttgaagat aagaaattaa atttagaaga acttgagttt ttacacatac  
91321 acaaaaccgc aaggcttatt gcagcggcct tgaanaatggg ttgtgaaatt tgcgagctag  
91381 atgaaaaaga aagcgaaaaa atttatcaaa tcggcttaaa gcttggactt atttttcaaa  
91441 tcaacgatga tatcatcgat gcgaccatga gcgaagaaga aagtggaaag ccaacaaagc  
91501 acgatgagca taaaaattct tttgtgaatt tattaggact taaaaatgct attcaaagca  
91561 aggaagattt gattaatgag tgtaaaaacg atcttaatga tcttgatgct aatttagcaa  
91621 aatgattaa aagcttaatg attaaatatt tataaagggtt acaaatggat ctatcaatac  
91681 tacaagaaca agcaaatact ttaagatttt taagtgcaga tatggtgcaa aaggctaatt  
91741 caggtcacc aggtgcacct ttaggaatgg ctgatatttt aacggcttta agttatcatc  
91801 tttctcataa tcccaaaaat ccaacttggc taaaccgca tagattaata ttttcaggcg  
91861 gacatgccag tgctttgctt tatagctttt tgcatttaag tggatatgat ttaagtttag  
91921 aagatcttaa aaatttccgc caacttcatt caaaaactcc aggccatcct gaaatttcaa  
91981 ctcaaggagt agaaattgct acagggccat taggacaagg tatagctaata gctgtaggct  
92041 ttgctatggc agctaaaaaa gctcaaaact tactaggaaa agaattgatc aatcacaagg  
92101 tttattgtct ttgtggagat ggggattttac aagaaggaat ttcttatgaa gcgtgttctt  
92161 tagcagggct tcataagcct gataatttaa tcatcatcta tgatagcaat gaaatttcta  
92221 tcgaaggaga tgtaagctta gcctttaatg aagatgtaaa aatgcgtttt gagtgcgaag  
92281 gttttgaagt ttttaagtatc aatggacacg attatgaaga aattgataaa gctctaaaac  
92341 aagctaaaga agccaacaaa ccttgtctta tcatcgcaaa aacaaccata gcaaaagggtg  
92401 caggagagct tgaaggaagc cataaaagcc acggcgcacc tttgggtgaa gaggttatta  
92461 aaaaagccaa agaaaaagca ggatttgatc caaatttaag ttttcatata cctaaagcgg  
92521 caaaaattcg ttttgaaagc gctgtagaac ttggagattt agaagaggct aaatggaaag  
92581 ataaactcga aaaatcagag aaaaaagaac tcttagaaaa acttttaaat cctgatttta  
92641 ccaagataaa ttatcctgat tttaaaggca aggatttagc tacaagagac agtaatggag  
92701 aaatttttaa tgcttttagct aaagatttag aaggattttt gggcggagat gcggacttag  
92761 ctccatctaa taaaaccgaa ctttatggaa tgggtgattt tgtagaagga aaaaatattc  
92821 attttgggat cagagaacat gctatggctg cgatcaataa tgcctttgca agatatggaa  
92881 ttttcttgcc tttttcagca acatttttta tcttttagcga atatttaaaa cccgcagcta  
92941 ggatagcagc tttaatgaaa atcaaacatt ttttcatttt cacacatgat agcataggcg  
93001 ttggcgaaga tggaccaact catcaaccta tcgaacaact cagcaccttt agagctatgc  
93061 cgaatttctt gactttttaga cggctgatg gcgtggagaa tgttaaagct tggcaaatag  
93121 ctttaaattg agatattcca agcgtttttg tgctttcacg ccaaaagctt aaagcattaa  
93181 acgagcctgt ttttgggtgat gtaaaaaatg gggcgtattt acttaaagaa agtaaagatg  
93241 ctaaatttac acttttagca agtggaaagt aagtttcgct ttgttttagag agtgcgaatg  
93301 aattagaaaa acaaggtttt gcttgcaatg taatctctat gccttgcttt gaactctttg  
93361 aaaaacaaga caaagcctat aaagatagac ttttacaagg tgaagttata ggggttgaag  
93421 cagcgcattc taatgagcct tataaattct gtgatagggt ttatggcata gaaagctttg  
93481 gagaaagtgg aaaagataaa gatgtattta aacattttgg ctttagcact ccgcaaatTT  
93541 taaatttcat tctcgataaa taaagatgga agcaaatttc aaatttcaaa aagaagaaaa  
93601 taaagttttt atttttggaa tttgggataa aacgagtgta tctaaaatta aaatcaaaga  
93661 tctattgagt caaatttctc aaacaaattg tatttttgat ttttagtcaat taaatgaaat

93721 tgatatggct ggagtgagat tttttcttgc tctagagcat gatttgaaaa aaaataatat  
93781 cttgatttta agacaaggat taaacacacg ctttaaaagt ctttttgaac tttgtgaaaa  
93841 aaactaccaa agaatcgatg aaaaacaaga gaaaaaatc aattttacag acttttttat  
93901 ttcttttagga attttaagtt ttgatctttt aaaaattttg caaaaattta tcagctttac  
93961 aggtgccttt tttactagtc tttttttatg tgtaaaaaat cccaaaaatt tccgctttat  
94021 atctttttta tatcatattg aaaattcagc ttttaagcc ttgcctattg ttattttaac  
94081 tgctctttta gtcggtggtg tacttgcata ccaagctgct tatcaacttg cacaatttgg  
94141 agctaataatt ttcatagtag attttagtag aatttcagcc actagagaac ttgctccttt  
94201 gatagctgcg atagtcatag caggtagaag tgcaagctct tatacagcgc aaattgggggt  
94261 tatgaaaatc acagatgaga tcaatgctat gaatactatg ggctttcgct cttttgaatt  
94321 tatcatcatt ccgcgagtta tggctttggt tattgctatg cttttaatcg ttgccttaag  
94381 cgatgcaatc agcatattgg gaggaatggt aatagcaaaa ataatcttg atatatcttt  
94441 tggagaattt ttaagacgct ttagagaagc tgtggcaatg aaacatatta ttatagggct  
94501 tgtaaaagct cctatttttg gttttttaat aggactgatt gcttgttttc ggggatttga  
94561 ggtcaaaaat accactcaa gtataggaat ttatactaca aaaagtgttg taaatgctat  
94621 attttgggta atagcatttg atgctttatt ttctgtggtt ttaaccataa tgggaagttta  
94681 aatgattata aaagcgcaa atatcatcac ccgatttggg aataaagttg tccacgatgg  
94741 agtaagtttc gaaatcaata aaaatgaaat ttttgggatt ttaggaggaa gtggaagtgg  
94801 taaatccgta ctcttaaaac aaatgttaat gcttgaacat tttgatgagg gagaatatga  
94861 aattttgggc ttttaagctaa aaaatatcag tgaagaagat gccttagcac tgcgtaaaaa  
94921 atggggtgta gtgtttcagt tttctgcact ttttagcttt tttagtgttt atgaaaatat  
94981 agctatccct cttaaagaat atacaaatth agatcccata gctataaaaag aactggtgtt  
95041 gatgaaactt aaaatggtcg gtttaaatga aagtgtttta aagcagcttc caagtgagct  
95101 aagcgggtgg atgcaaaaa gagttgccat cgctagggct ttggctcttg atagcaaatt  
95161 gcttttttta gatgaaccaa cttctggact tgatccgcat agtagtcgtg aatttgatga  
95221 tttgatacta gaactcaaac aaagctttga tcttaatat gtttttagtaa cacatgataa  
95281 agaaaagtatg aaaaatctac tcgagcgttt tatcatccta gaagataaaa aagttgcctt  
95341 ttgtggaaat tatgaggagt taaaggcgca aaatgaaaga ctttttaaaa gatttatgga  
95401 gtaaaagtgg aaaataaagc gaattattht tttgtagggc tttttgtttt tggagttttt  
95461 tttgctagta ttggcttcat gctttggctt ggaggatact caaaagaaga aagttttgaa  
95521 tactatgaaa ttcatacaca agaatccgtt gcaggccttg gaatcaaagc tcttgtaaga  
95581 cttttgggag tagagatagg aaatgtagaa gatatcagta tttacgataa agaaaattta  
95641 ggggtaataa ttttaatcaa aatcaaaaaa ggaaccctta taaaagaaga tacttttgca  
95701 actttgcaac ttcaaggtat tacaggactt aaatthgtac aacttcaagg aggttctaaa  
95761 aatagtccaa aacttcaagc aaaagataaa gaagaatthc cagtgattca gtttaagaa  
95821 agtttttttg ctgccataga tagacaaagt gagcatatth tttctttgat aaaaagagca  
95881 gatgataaat caaaagaact ttttagtgat aaaaatthaa aaaatthaga aatactthta  
95941 aataatthtag cacaactaag cgctactthta aatgaaaatt ctaaaacatt aaatcacaat  
96001 atcgcaacaa ctagctthaa acttggagaa atggcggaga atgtaagctt gagtgcaaaa  
96061 ggttttaacg cgagctthaa ggatatccaa gaaggggctt tagcacttag ttcttttgca  
96121 aaaaaagcca atgctaaact tgattcttht gatgacttgc gactttcctt agatgaaaat  
96181 ttagaacttht tgaaaaaagt actthtagaa agtaacatth taatacaaaa tttacaaaaa  
96241 agtccatcag atthaatctt taaagaaacc aaacccaat taggaccagg agaaaaataa  
96301 tgaaaaaatt tatactcata gccatcttag cccttatatt taatgcatgc tcgattccaa  
96361 ctgactctct tgataaaacg caaagthttta tacttaaaaa tgatgggatt cctcttcagg  
96421 ctaatthttat taaaagcgat aaaatctthta aaatthcaaaa tgcgtccttg cttttatctc  
96481 ttcactcaag atcaattatt tatatacaaa aaggtgtaag tggagcttht gcgtatcatt  
96541 attgggcgga tttacccaac aatctthtct aatctthtact cctatctaaa tttgaacaaa  
96601 gccaaatctt taaaacccta ctttccaag gaagttctat aggaagtgat tatatacttg  
96661 aaagcagaat agattcttht gaacaagtga tcaatgaaaa tgaaaattat attagcattt  
96721 ctattagtgt gaatthcatt gacgcaaaag aaagtaaaaa tattgcccct cgcttgthtt  
96781 cagtcaaaaga agagcttgat aaaatagata tthttaatgt ctatcaatcc tttgaaaaag  
96841 ctttaaattht tataggaaat gaaatagtht tgtggataaa tactacactt gatgaaaaat  
96901 aggaacttht tttgctthtt aaactthtag caatathttt tgaaaggtgt aaaatgaaaa

96961 atgaattgga tgtttttaag aaacacttgg gcgaaataca aggcgtaagt gaatttaag  
97021 ctacacaaat ttgttcacaa ataatgatg caaatgattt tatcggtgct ctacaaatac  
97081 ttgatttaac gcttaaaaaa attgaaaaaa gtatcaccga aagacttgat gagcaaaacg  
97141 atgatttaca aaaaagaacc ttagatgcaa cgagttctca acttatccaa aactgctctt  
97201 ttatgggtac agcacttttt ggaaatattt tcaatgtata tgtaggtaa aaactttttg  
97261 aatttgaaat ttcaaatcct cttttagttt tagaaaaagc aggatatgag ggtgttttag  
97321 cttatgttca agataaaaga gatgaaatta aagatatttt atgcgaatta tcgagtgcta  
97381 ttactatggg aataggtatg gataatttga atttatctaa ttctactaca gactttaaaa  
97441 atttattcag ataagggtta aaactcttat cgctttaaat gtattcgtta aaaaaataat  
97501 cttaagaagt ttttatattt tagcttaaag agatattcta ctcttcttta aagctaggtt  
97561 gaaaaaaagg gggaggggag caacctagcc tgtgagatct ttgaagatct ctttaacta  
97621 aatatcaaaa tcatgttttg gtttaattta taaatagtta ttttaaaaat gacattttaa  
97681 tttaaattta cttaaattt tataaaaaaa taatttaata atttaaatta ttaaattatt  
97741 ggaaaatttt tgtaaaaatt ttccaatttt taaaaataa aactcttata aagtagataa  
97801 aatttcagca cgcccattaa taatagccac acaatgttca taatgtgcac tattaagctc  
97861 atccacactt cctgcatccc attttccatt aaaatgcttt ggagttccat ctttttgga  
97921 tatcataggt tctatacaaa ataccattcc atttttaatt tttggcccac tttttgcatt  
97981 tgcacctttt tctaaataat ttaaaatttc aggttctcca tgaggtttgc gtcctatacc  
98041 atgcccgcaa tatccacgaa gtggaacaaa acctcttgaa tctataaatt cccctaaagc  
98101 tgcagaaagt tctttaaaac gcattccttc gcgaataata tctatagcat gatacaaagc  
98161 gtccttagca caagaaatca aagcctcatc tgtggatgaa attttacctg tggctatggt  
98221 acgcgccgca tcaccataat acccatcgat caagcttccc acatcaagtc ctaaaatgct  
98281 accctctttg atgatttttt catcaggaat tccatggatg caaacctgat ttaaagaagt  
98341 gcaaattgca ccaggaaaac cataaagccc tttaaatgaa ggttttgctc caagacttaa  
98401 gataaaatct tctgccattt tatcgatttg cttaagactc ataccgctt taatctcatt  
98461 ttctaaaaaa tccaaagtct tagcgacaat ttgatttgct attcttaatt tttctatttc  
98521 cgctggtttt ttttaattcta tcattgtatt tccttataaa ttttagccaaa ttttagcagt  
98581 attttctaaa gacttgacat cgctcgaagc ataaaaatgt aattttgctt ttttttcttt  
98641 taataaaagt ttttgccctt gttttaaaaa ctccactata gcatctctctg aatgaataag  
98701 ctttgtcttt gaacccaaat aagcactcaa ggaatttgcc agcaaaggaa aatgagtgca  
98761 agcaagtatc aaagcattag gagtttcaat cccttataaa taatgtcgca tagcactttg  
98821 caaaaattct cttcaaaaaa taccctcttc aaccataggt acaaaaagac ctgtagctaa  
98881 agcatctaca ttagtaaaac cttgttcttg taagcgattt tgatattctt ttgaatgaat  
98941 tgttgccctg gtggcaataa ctagaatttt tttattttta tccaataaag cttttttagt  
99001 agcctcaaca cccgcatcaa taaccataa aataggaaaa tcagctcttg atcttaaagc  
99061 atctaaagca taagcactgg ctgtattaca cgcgataata agcatatcga tattaaattt  
99121 tgaaaaaaaa tctaaagcct caaggcaaaa tttgactata gtatccttat ctttaacccc  
99181 ataaggaacg cgagcagtat ctccataata aataatttcg tcaaaaagtc ttgcctcgta  
99241 aagcgatttt aaaacgctaa gtccgcctac accactatca aaaacaccta ttttcatctt  
99301 aatatcttct agcacctata tatcgatttt tccaataaga actatttaaa tccacttctc  
99361 ttactccgcc tttttagtaa agatggataa atttaccctt gctcatataa attcccat  
99421 gcataccatt tggacctctt cctgttttaa aaaaaacaag atctcctggt ttttaatttg  
99481 atttagaaac ttttatacc gagcgtagtt gctttgttgt agtacgagg atatgtgtat  
99541 taaactgagc taaagtactt tgagcaaaac ccgaacaatc agctcctctt tttgtagatc  
99601 cacccaaaac ataaggagtt tttttccatt cattagcaat ggctcttaat cttgtttctt  
99661 tatcaacatt ataatttatt ttagtatgac ttgtattttg agataagcta catccaccta  
99721 taaaaaaagc aaccataata acaaaaaaaaa taaatctcat aaattttcct aagaacgagc  
99781 ggtaaaaaat ttaagataga taaaaccca aattccagaa caaatgaag caatcaaaat  
99841 agcaagatta tccgcatagt taaaaatct actgacctca tatgctaaac catctataaa  
99901 taaactcata gtaaagccaa tacctgttaa aatacaaac ccataaagct gctttaaatt  
99961 tgcattttga ggtaagcttg ctaattttaa tttgatcgca aagtatgaaa acaaaaagac  
100021 tcctaattgt tttcctataa acaaacccaa aaaaatacct atactaacgc cagaaaaaat  
100081 agcattttaa tcaatatttg ataaattaac cccgcattt gcaaaagcaa ataaaggtaa  
100141 aataacaaaa gctatccaaa atttcaaac ttcataaatt ctttctaaaa aatcttctcc

100201 attttttagtt tgcataaggta taaaaaatgc tgtaataatt ccagctaaag ttgcatgcac  
100261 cccactttttt aaaacgctta cccaaagaat gattgaacaa ataaaaataa aagatttgcg  
100321 tgttatgcct aaaatattta aatcaacat cataaaaaata gcaattcctg cgactataaa  
100381 agcaaatatt gaaagtttgg ttgtatagaa aattgcaata attaaaatcg cacccacatc  
100441 atcaaaaaata gccaaagaaa gtaaaaaacaa cttaagacta gaggggatat gttttccaca  
100501 catcatcaaa atagccaaag caaatgcagt atccgtggct gtggggatag cccatccttt  
100561 taaagtgtaa gcatcgccta tattgactat agcaaatatt aaagcgggta taagtatacc  
100621 gcctaagcc cccataaaaag gtaaaactat attttttaggg tttttaaagt ccccgtag  
100681 aaattctttt ttaagctcaa ggcctatagc gaagaaaaat atcgatataa gaccatcgtt  
100741 aatccaaagt aagaaaggct tgттаagctc aaactcacc acactaactc caacttttaa  
100801 attgagtagt tcgcgataat gctcacttaa agaaccattt tgcacaagta gagcaagtat  
100861 agtacaatt atgagtaaaa atccaccaa ggcctcattt aatactaaag cttttaattt  
100921 taataaaacc ttattcattt aacaatttta agatatataa atccaacaat agcacttaaa  
100981 aaactcgccta ttaaaatagc tagtttatcc gcgtgctcaa aatattgct gttttgtat  
101041 gccaaagccat cgataaataa actcatagta aaaccaatac ctgttaaaat acaattccg  
101101 tagaattttt tatacttaat attttcaggc agttttgcaa gctttaattt tatagccaaa  
101161 taacaaaacc caaaaactcc tagttgtttt ctaaaaaata aaccagcat aattccata  
101221 cttacaggtg aaacaataga ctcaaatgc atatctctta aatcaatacc cgcatttgca  
101281 aaagcaata aaggcaaat aaaatacacc acccaagggt ttaaactcct gtgcacttcg  
101341 tgaagatagg gttttttatt ttttagtatca agaggaataa ataaagctat gattacacc  
101401 gctaaagtcg catgaacgcc actttttaac atagctatcc ataaaaccac tccaactaaa  
101461 acataaagag gcaagtgagt aacatgaaaa taattcaaaa caataaaat aaaaacacat  
101521 aaaagacata caataattgc taaagtagat aattgatctg tataaaataa agcaatgata  
101581 ataatagctc ccaagtcatc aaaaatagct aaagaaagca agaataactt aagactagaa  
101641 ggaattttgc ttccaaaag cattaaaata cctactgcaa atgctatata cgtagctgta  
101701 gggatagccc atcctttcat agcaattca tgagaataat taatagcaga aaaaatcaaa  
101761 gcagggacaa tcataccgcc taaagctcca aatataggca aagaaactga tcttatattt  
101821 ttaagttgtc cgcgtaaaat ttcataattt aattcaagtc ctatacaaag gaaaaaata  
101881 gcaatcaaac catcatttat ccataaatcc aaagatttag caatctgaaa atgatcaaat  
101941 cctatagtaa aattagcatg aaaaaaatct gtataaataa cgcttaagga agaattttta  
102001 aaaagtaatg ctaaaagagt aaaaaatatg agcaaaatgc ctgggaaagt ttcacttaaa  
102061 attattttct ttacagcttg cattcacgcc ctttgattat aaattcaata tgctaattat  
102121 tataaccaa aaatatttaa gaaatgatta ttttaacaag atatatcctt atttagggtg  
102181 taaaaacacc ctaaaattta agatacttaa gcataaatat ctaaaccact agagctagaa  
102241 gcttgtggag cagaggctcc tgatgcactc tccatacctt tgataagctc attcataaac  
102301 acctcattcg tatccattga ttttttcaaa accgaagtat ttactgctgt caataaatta  
102361 gcattactca tagttgcgtc tgaaatcata acaccctcct aagtataatt tatgtatgaa  
102421 gacttaagta gtatcggaaa aaaattttaa cacttaacc tttcaataaa aaattatttt  
102481 tatctttatt taatatgatt cgtattatac ttctatcaat attgataata aatattattt  
102541 tttatatttt taaggaaatg aatgaaattt tttaaaatct tgtttgttct ctctatgctc  
102601 tttctagcaa attctgcttt tgctagagtt gatgattata tagcagaagc taataccatt  
102661 aaaaatatac tagaagagag tataaaaagc tataaaaaag gcgataatct aaatgctaaa  
102721 aactaagcg aagacgctta ttttcaacac tttgaaaata tggaaggttc tattggacga  
102781 aatataggca aaaaagccat caccatggaa agaaaattta caaatttgcg tcgcttgtat  
102841 aaagataaag cacccataga gcaaattgat gctttaattg aaagccttta ttatgattta  
102901 gatgaagttg caccgatttt gcaaaatggc tatcgcttaa aagcagaagc aagtataca  
102961 aactacgata aagcagcagc tgaaaaatca agcatgcaag ccaatgcaa gcgcaagca  
103021 gaagcagaag ctttgattgc tcaaatgatg ggtattgata agaattgatt agcaaaaacc  
103081 aatccctctt cttttgatac tcaaacgaa actatagatg atagtgtgaa tagcgatttg  
103141 caagcggctg cagctatgga tgcaagattg caatttatat tagataatat atctactaaa  
103201 ttctctcaag cagccaatgc ctttaaaaac aaagattatc aagcaagtaa agatttttta  
103261 aatgatgctt tatttaatga ttatcgcaat accaaagttg aagttttaat caacaaattc  
103321 accaaagcag gtaatgatca aaaaatcaa caagccatac gaactctcat acgccaatc  
103381 aacaacacaa atattgatga aaaaaaccta agaaatgatt tagattcgat agaagaacag

103441 ctttttgata tctttttaca aattccaaat tcagagcttt caaatTTaaa aatcgaagga  
103501 tttaatgatg aaacaaaggg taaagattac actaaagttt ctgatgatat caaacttgcc  
103561 ttagatgaaa ttttaaaaaa ttacgagggt tttagtgcct ctatagtaga tgattttaca  
103621 gcaatttatt tagatatttt tgaagccagt ggaatggaaa ataaaatcgg tgctgtagat  
103681 agtgctttta aacttaaaat cgaaagtTTa tttccaaaa gcgtagctct tatcaaagca  
103741 agtgcgagata aaaaagagct tgaagccact ttttaacgact tagaacaact gattgcaagt  
103801 agcgtggata aaattcaaga ttcttcgcct tattcgcctt ttatatgggc tttgggtatt  
103861 atcttgctg aaggtttgga ggctttgatt atagttgtgg ctatagtttc ttatcttgta  
103921 caaagcggca ataaaaatcg ccttaatatc gcttatagtg cttattttac aggtattata  
103981 ctaagcttca tcaactgctt tgggctctct tggcttttta aagaaaatgc gggacaaagt  
104041 agagagctta tagaaggcat taccatgctt atagctgtgt ttttactctt ttatgtaggc  
104101 ttttggctac tttcaaatgc gcaaaaataa aaatgggtaa gttttatcaa gcaaggtgct  
104161 attgatgcta tttcaaacaa tagtgcaaaa accctttgggt ttacagtttt tttagcagtt  
104221 tatagagagg gtgctgaaac cgtgcttttt tatcaagctt tttttttgga tgctaaaacc  
104281 agtactgatt taagtgcct ttttggcggg cttgggcttg gaattttagt gcttattgtc  
104341 ttatattttc ttttaaaagc aggcgcgatt cgtatcccta taaaacaatt tttctatata  
104401 tgctcttata ttatttttta tatgattttt gtctttacag gcaaaggcat agccgaactc  
104461 atagaaggaa aacttatcgt tcctagtctt atatctatga attttgaacc tttttatgg  
104521 cttggaattt atccttatta tgagacttta atccctcaat ttatagtttt aattttgcta  
104581 attattggca ttttattaac aaaacaaatt tcaaaaaaag gagtaaaatc atgataaaaa  
104641 aatttttatc agtagttgct gcagctgcag ccatcagtac taatttgttt gcaggcgaag  
104701 ttccaatcgg tgatcctaaa gagttaaacg gcatggaaat agctgctggt tatcttcagc  
104761 ctatcgaat ggaaccaagg ggtattgatt tggctgcgtc cttagcagat attcacctag  
104821 aagcagacat tcatgctctt aaaaacaatc caaacggttt tccagaaggc ttttggatgc  
104881 ctattttaac catagcttat gagcttaaaa atacagacac aggcgctatt aaacgcggaa  
104941 cttaatgcc tatggtagca gatgatggcc ctcaactatgg agcaaacatt gctatggaaa  
105001 aggataaaaa aggcggattt ggtgtaggta attatgagct tactttttat atttcaaatc  
105061 cagaaaaaca aggatttggga cgccatgtcg atgaagaaac aggtgtgggt aaatggtttg  
105121 agccttttaa ggttgattat aaattcaaat acacaggcac gccaaaatga ttttacactc  
105181 ggattttccg agtgttttaa tttttttatt tttattttta aatcaaaata acaatgttta  
105241 aagagtaa at tatgagtata tttttgtgc attttcttc tagcatcttg ctttaagta  
105301 ttttaatggc ttttatcaca cccaataaaa aatatatttt taaaagcttt ttagctgttt  
105361 ttttgggctt tttgtttggga tttttgctt tttttattgc ggcacaattt ctaaaaactg  
105421 agaatttgat attttaattc aattttattt ttatagcctg tttgcttttg agttttgtgc  
105481 tttatttttg gcaaaaaata gaaattttga gttttatttt actaggaatt ttgagttttt  
105541 gtatagcttt gcattattat aatttaactc aagattttcc tatatttaac ggtgttttaa  
105601 tcgatagtga agccatttct tctttgggtt ttattgcttt agctttatta atttgtattt  
105661 taattttctt ctttttaaaa tggcaaaaga atatcaacaa aaaagcaagt tttgtacttt  
105721 ttttaatcct tttttttata gaaggagata aggttttagc aaatatattg cttacactga  
105781 tgagaaattc tttcatagaa actcactact ttttagtaag tttgtttgga aaaagtaatt  
105841 attttgggtg ttttgggaatt tatgtttatt ttttttcat cttttttta gcttttttaa  
105901 gtttgcaaat tcgcaaaaaa aatattgtaa aaaagcaaat ttttagatatt gcttatcgca  
105961 aaaatgaagc aaaaaaactc ctcataaatc gctatttttc tagtgttttt atctcttgta  
106021 ttttgagttt ttgtatcatt ttatactttt ttatggtaag ttctaaacct ttaagtatag  
106081 atgagcctac agagctttta cctgataaaa atggcaaat ttttttgat gtagcccttt  
106141 taagagataa caaacttcat cgttttgctt atataagtga gcaaggcaaa gtgataagat  
106201 ttttctcat caataaaaga gaagataggg attctccgt ggctgttttt gatgcttggtg  
106261 ctatttgggt ggatatgggt tatattaaaa aagaagggga gtttaatttg atttcgtgca  
106321 atgtgcgaat ttttctaccg agcgtaggaa aaacaggcgg ttgcaatcct atcccattaa  
106381 aatatgatta tgatgggtgaa aaaatcacca tagatgttaa agatgtttgt gcaggatcta  
106441 attatttttag tcaaatcaaa gatatacaag tgcaagatcc tgtttcaaaa gataagatca  
106501 ttaacactca agcacctttt tcttacagct ataaaggcat aacttattat ttttcaaatg  
106561 aaaaaaacta tgaggaattt aagaaagatc ctatgaaata tgtagaagat acagaagcct  
106621 ttttttaat ccaaaggaga aataatgcta gttaaaatga taactcattc tatctttaga

106681 aataaaattc aaaaatttct agcttttctt acttgttttt tggctacgct tttgctatgt  
106741 acaatgttaa atatcactct aagtataggc gatgaagtga ctaagcaact taaaagttat  
106801 ggatctaata tactggtttt acctaaaggc tcaagcctta gcatagaaat aggtaatgag  
106861 ctttacgaac ctttaaaaaa caaaaactat ttagaagaaa aaaatttata tatgttaaaa  
106921 gatatttatt ggcggaacaa tatcacagcc tttgctcctt ttttagaagg aaaagtagaa  
106981 ataaaaagca atgattcttc aaaaaaagca ctcttttatg gtacttattt tcaaaaagcg  
107041 attgagataa aagatgatga cgattttatc acaggtatta aaagtcttta tccttattta  
107101 aaagtacaag gagaatgggc caaagatgat agcaatgaaa tcatgctagg tgaagatttt  
107161 gctaaaaata acgatcttaa aatcaatgat acgataaaac tcataggaga gaataaaatt  
107221 tcaaaagaag taaaagtcgt aggaatttta ctccatgcca atcctaaaat gtcaaacaaa  
107281 atcatcgctc ctttaatttt agctcaagaa ttattagaaa aaaaaggctt gtatgcaagt  
107341 gctgaagtaa gagcttttac tatacctgaa tcagctcttt ctgaaaaggt acgccgaatg  
107401 ggcgaggaaa aactcgatca aatagaatat gataaatggt attgctcagc ttatgtagga  
107461 tcaattgcta gtcaaattag cgatggcttg ccaggagcgg atgcaaaagc actcaatgcc  
107521 ataagtgatg cacaaagctt ggttgttaaa aaaattcagt ctttaatggc tattacttgt  
107581 attatttgtc ttattgttgc aagtattgct atatcaagtt taatgagctc tgaattcat  
107641 cgtagaaaaa aagaaatagg acttttgaaa gtgcttgag caaatacatt tcaaatttat  
107701 ttactgtttg caggtgaaaa tttgatcata gctttagttt ctgctgtatt tggatttatt  
107761 tttggcatag gactttcaga gcttatcagc cttggaattt ttggatactt tatagacatt  
107821 gcttttatag ccttgccctt aagtcttgta tttgcagggt tgatagctat acttggatgc  
107881 ttgcttccta taaaaaatat cgcaaatctt tctcccgcag gagttcttta tggtagataa  
107941 gtttttttta aatgaacttt ttaaaagcat tgctttttct tatcaaaggc tttttattat  
108001 tgtcttaagt gtttttatag gagcactaac ttgctcggct tttttaaata tttattttga  
108061 tattgataca aagctttcta aagaattaaa agcctatggg gcaaatgtta tcatcgaacc  
108121 caaaaatgat aaagaactta tcttaaatca agactatgaa gaagcaaaaa agaatttaaa  
108181 agctagagcc ttaactcctt ttttgatata atttttaaat ttgggtagta ctagtggagt  
108241 ggttttgggt acagatttta gagccttaaa gataactaag ctttttatag aagttaaaga  
108301 agggagtttt tctctaagtg attttgatga aaattcagct tttttgggta ttaatttatc  
108361 caacaacta ggacttaag caggcaatga gcttcaaatt tacaaccag aaaatggcaa  
108421 aactaccaag cttacgataa aaggcactat cttagcaat gatgaattag acagcatagt  
108481 ttttagcgcct ttaagcgtag tacaaaattt aagcgacact tttggcattc agtatgctaa  
108541 tgcggttgtt tatggaaatt ttgatgagat aaatacaaaa acaaaaaata ttagcaatga  
108601 aagcattaat gcaaaccta tttcatcagt atccttaagc gaaggcctag ttttagacaa  
108661 aataaaagct ttaatgtttt taatcactat tgttgtctta atcatagtca caacaagtgt  
108721 aataccact ctaagctcga ttatattttc gcgtaaaaaa gaaattgcct tgcgtttggc  
108781 cttgggcgct aaaaaaagtg aaattttcaa gctttttgct tgtgaatatt ttatcattag  
108841 tctttttgct agcattatag gagctttttg tgggatattt ttagcaaata tatttggata  
108901 tttgattttt aatgcaagta tagatttttag atttaaggct gtatttatgg ctttaattat  
108961 ttctttgttt tttgcttttt tagctgcctt ttttctata aaaaaagcat taaaaatcaa  
109021 tgtctgtgaa aatttgaaag gtgaataatg aaagaactta tacaaattaa aaatttaagc  
109081 aaagaatttg gtaaagtaaa agcactagat aatataaatt taaatattta caaaggagaa  
109141 tggcttgcca tcatgggtcc ttctggaagt ggaaaatcaa cgcttttaaa tatattatct  
109201 cttatggata atccaagcag tggcaaatac attttagata atgaagattt agagcaaatc  
109261 aatgaagagc aaaaaatcac tttgcccga gaaaaaatcg gtcttatttt tcagcaattt  
109321 catcttattc cttatcttag tgccttagaa aatgttatgc tttcgcaata ctatcattct  
109381 agtgtagatg aagaggatgc aaaagctgta cttgaaaaag taggactttc acaccgcctt  
109441 agccatttac caagccaact aagcggtgga gagcaacaaa gagtttgcag agcaagggcg  
109501 ttgattaaca atcctgaaat tttacttgct gacgagccta cagggaattt ggatgaagcc  
109561 aatgaaaaaa tcgtccttga aaccttgcaa aaattaaaaa atgagggtaa aaccatagtc  
109621 ttgatcacac acaatcccga attagcaaaa tttgcagatc gcacccttat cttacagcat  
109681 ggagttttta aatgaaaaaa gtatttttat ttttcataag tctttttttg ctcaatgctt  
109741 gctcttttga tacaatcaa aaccaaggta aaattggcca aataggagct gaaatttcag  
109801 ctaaagatac ttcgggaaag gctgttaaat tagctgatga taaaagcgat ataaaggttt  
109861 tggttttctt tcaaaatggt tgtccttctt gtttgcaaga gctgccttct ttggataaat

109921 ttatgcaaga gcatcctaataaaatcagcgtttatgctataaattcggtagataaagctg  
109981 aagtcgttca ggttttggccgaacaattaaatnttaaaaaatcaaaagttttaaccgatg  
110041 atcttaaaatcaccaatgatcgctacgctgtatnttcaaccccgaccaccatcatactta  
110101 aagatgggatataaaaagaaagaatnttagagaaaaaccatggcaaaacttcgaatcca  
110161 aacttatctctttgcttttaattacagctttatnttttatagcttgcgatagtggagaaaa  
110221 tttcaaagctttaaatagtgataaaatttataatnttcttataatggttttgaaaaaag  
110281 tttaaaactagacgagcaaacacaaaattttgcattagtttttttactaagattgtgg  
110341 ggtttgtaagaacaaattctatnttgcaagatttagctaaaaattatgattttaatat  
110401 ttttgtggtttaggtgatgctaaagacgcaaaaggacgctaaagcttggcggatgaaaa  
110461 gggtttatcgcatctagcttgttttatgaaagaaagcagctaaatattctctcggtgc  
110521 agttggggaaatatatgggtacctgtacttagctnttttaagaaagtaaatggatga  
110581 aaaattcataggtttaacgcttataatgtgcttgaanaagattaanaaactaaaaat  
110641 ttgattttatattaaaaatntttaccgcaataacctaagactagctaggatagcgata  
110701 aataaatcaaatnttaaacataatctaaaagggtgattctttatcacttttttcagg  
110761 cttttctcttaattntttaaactcttctaaagcataaatttaagctctttaagtccagt  
110821 tttttcaagacttgataaccttgattaaagctttgtggaatcaatactttttaaata  
110881 ttcttctaaattcgctatattttgggtgatctgctcggcaaatcttcaccaaattcac  
110941 actatcacttttgaaatcttatgccaactcacgccaanaagctcatttgaaaattt  
111001 ctcaagctctttcttagcctataaattgctcttttagaggcatttcttcataggatc  
111061 tagtacaagagtaaaaaactcgtgcgttaatatgttttaaatgcaagcctaagcc  
111121 tttgccccacttgcacctcgataatccctggaatatcagccatcacaagaattata  
111181 ctcatccactctacaagccctaattttggtgtgagcgtgtaaatctcaatttgcgat  
111241 ttcaggcttagcatttgaaactacacttatagggtggatttcccatatttgaaagcc  
111301 tacaagccctacatcggcgataagtttaagttcaagtcttactaaacgactttcacctt  
111361 aatacctggctgtgcgtaatcagggcgttggttgtagcgtttaaagtggtattccc  
111421 aagtcctccttgccacctttagaaaaagctctcttttgaccctctttttaagatctag  
111481 taaaacttcttggtttgtgcatcgataatttgagttccctcagggacaaagactctaa  
111541 attttcaccctttttccatntttattgctccattccaactgcgcattttgcgcacg  
111601 aagctctcttttgcccttgaatnttacaagtgtatgtgtaattgtatcacaaacaagat  
111661 gatatcgccaactttcctcatcgccaccatcaggcccaagagaggaaatgcttttct  
111721 acgacgaaactcaccgcacccttgccaccatcgccagaaactaaagtaactttaact  
111781 atcaataaacattataattgcttttgatttaaatntataaagctaaatagaataaaaa  
111841 gaagttaaatttataaatttaagtttctaaggcgtaaaaacgcccataaacttatgca  
111901 ggatatacagaaactntttctgtcttttcttttctttcaaatctcacaaaaccatca  
111961 attaaagcaagatagtgtatctnttctatgcctacatttttctgcatgagttgca  
112021 gttcctctttggcgaatgatgatnttctgctctaacgaattcaccaccaaatnttnta  
112081 acacctaagcgacgacctatagaatcgcggttattttgagttgaaccctgaccttctg  
112141 tgtgccattcttactccttaagctttgatctctttactacaacgcgagtgattgtct  
112201 tctaaaaccggtttaagtttagaatcttctctgctcttttttataaaacacaactt  
112261 tttatctttccgtgattaaacttccaaacaactttgcacctgtaagaaaggcgc  
112321 acctaccttaattctttatcattgatagcaagaacttgccttacttcaaatttgcctt  
112381 gctttcagctcaaaagtgatctagctttaaactcatcgccaacgctaacttatactgctt  
112441 tccgctgtgtttaataatagcatacattgctttttcttaataatntggtaagtaccaca  
112501 aagcaccgaatttcggatttgaaagcttataaggctagaaagttntaattttcaaaaa  
112561 ttttctttaaactttgatgataatntaagaaagacttttagagtttgaaccaaacctaaag  
112621 tggtttaaaagccaagattaacccgccatttcatgaagtttataagtaatttcttcc  
112681 ctcttgtttgttatcttctctaaagtattcaaaaatagtgattnttccatttctctt  
112741 gcataaataacgcaatgttttcccaattttttgctctttttgctgtcgcagataaag  
112801 taaaagttgtattgaagttttagaaaaaacaagctctctgtaggataaataataagct  
112861 tataggctatattatacttgcntttgtatgttttgatagcttatcttctttgttttg  
112921 cttgagtaatatctaaaactcaaaattccaagatataatcagcggccaaaacattacca  
112981 atttatagctttcttactaagactatcttcaactntttatantcttatttcatctttaa  
113041 aatcatgctctctttctaaagagtaaaaactctatctcggaaaaagcactatataaag  
113101 ctctntttaaatatgtttcttctttatnttatcatttaaattgctaattttggtttat

113161 tatcgttttg atacaaagat ttaaaagccg aaatthcaac ttgccaagc gttccatttt  
113221 ggtcaatttt atctactttg taagtatcga tgcgaccctt gcttacattt tgaagaatgc  
113281 ttttagattt ttgtgaaatt tgccctaagt gagagaaatt taaatcaaca ctttgaattt  
113341 cttgtcttaa attgacacta gaaactcctt taaattgcga caaagcatcg attaaagcat  
113401 tatttaaagc ctcttctttg ctttctcctg ttccattacc ttgcaccact ttttgaaatt  
113461 tatttctttg gtgtggcaag gttttaagac tctgaacagg atctaagaa cttaaattaa  
113521 catcctctaa tggaacataa tcataaataa taacatcatc ttgagcccac ataaaactca  
113581 agatggttaa gaataaaaag atttttttca ttaccaagtt accgatttgc ttgaacctgt  
113641 tttatcaatc gttctttcat cttcccaata agcaagtcct gaatttaa at ccgtaacgct  
113701 tagataaaag aaatactctg cttgtatatc accattttta agcttgacat tgtcttctgc  
113761 gatcttacca ctgattgaaa aatcaggtgc aaccaaagtt cttttgctag aaatgggtatt  
113821 ttgattaaat tcatcattat ctcttaattc tcttactgct tcaactattt catctctagc  
113881 tccacccgct gcaacagctg ttgttaaaac aaatthacct gattttctaa gcgctatggg  
113941 gatcttacta atgagcttat ctgtatcaat gcgttgggga gtatcattga taatthtggc  
114001 tatagcaata accttctttt gacctggctg aatattagca aaagcaggat cgttcaacat  
114061 gctatctatc ataatttcag cagttttttc aaaatcttct ctatcaagcc ccaaagttaa  
114121 agcatcgcct tgtttttttt gacttgcata accatctgta taaacaggcg ccccgcaagc  
114181 tgcaaaaaat actgcaaaaa atgcactaaa gattataaaa atatthtttt tcatthtttt  
114241 ctctthtttt tgtaattata ctctthttt agt tttcaattht gtaaactcta gtgggaaatt  
114301 gagaagcaaa agaactact acaatcaata cttthttgtc aatatccact tcaactagaat  
114361 aaatthttttg atthtttatta tcataaattt gcaccaatcc atcattthtca atcatcataa  
114421 tttgtatatt ttttaggtaaa aaatthcaaa atctthaaatc acttcttgtg gttacaatgc  
114481 taaaaatatt ttagcaaga cttaaaattc cactctcatc atthtttagct acagccatat  
114541 ttaaacttgt tthtaagtgt cttgagatta aagatttgat gataatcggg gtcaaatttg  
114601 ctthaaattc acttgcaacg atthgatcaa aatcaaaagt attggaagtc gtaaaattht  
114661 gatgattgtt tgcaatattt aaataatcat aagaagcatt acgctthgtt aaaataggca  
114721 aagcaatact aactgttgta atataatcat caaagataaa aggtaaagtt agactaaatt  
114781 catcaaagc gggacttaat ccattthtcat atattataaa aatatattht tthaaattht  
114841 ttggatttaa actgcttgaa tattgatcaa aaatctthaa tctthtttct atthtctcat  
114901 ttaaatttag cacataaact tctthtaagta aatctgctgc tthtttataa tcataatcca  
114961 taaagaaaaa tatagatgaa atataagttta cataaggatt agtatattct tthtgtgcat  
115021 taaaatcttt aaaaagattt tcatattgtt ttgaaacaat tthtatatta ttatcgatat  
115081 tttgccttaa tthttcttcc ttgctggcct cttgatatgc tthtttaatt tccggaagcaa  
115141 aatactcttt tgcctthtct tgtctcatca atgctgctg tt aaatthcacc ctgacattaa  
115201 caaatctcc caaactcata aaatthtaac cttgttaaac attaagcatg gttctthtcat  
115261 accaagcacc ttgataatca tthacaccct cttthtcaa agtagatgca agtgttcttg  
115321 tgctthtctt ggataaactt tgcaaatcca catcgtattht ataagaatct tcaaccttat  
115381 caaaaataga attacttaag ttaaaatcct tacaatctct tgcaatatag cccgtattht  
115441 aacctatgaa aatcacatct ttatthttgat tgatctthtct ttgctgctct tgaaaaaatt  
115501 gcttattaca agtttgagag aataaatttht gttgatagaa tacatthttgt tcttgatgag  
115561 tagagcatgc agaaaaaacc atagccaaaa tagaaaaaac aattgthttta tatctcatta  
115621 taatthcaaa aataaaaatt ataattthaat atatcataaa attgataata gcccaaaaa  
115681 gggctattac attaacatag gagcgactac aaagcctaaa gctacagcga ttgcgatagc  
115741 taaaactcct ggtataaaga aagagtgatt aaagataaat tthccgattc tagtagtacc  
115801 tgtatcatcc atthtgcacag cacctaataa agtaggataa gtcggaagca caaaaagtgc  
115861 tgaaactgct gcaaaaacaag ctacaagcat ataagaatcc tgtggatttg ttgcgcta at  
115921 tcctaaagca gtaacaatta caggtacaat agcctthtgcg gttgctgctt gagaatataa  
115981 aagcatactt gcaaaagaaa aagccaccgc aagcatagct gggctthgtt ttaccaatc  
116041 acctgctact tctthtaatag aagcttcatg ccctgcaaca aaagtattht caagccatgc  
116101 tacacaaaa acacaaatgc aagctgtcat accactthtta aagacgcttg tatcaagaat  
116161 ctacttaggt tcaaccttgc aaagccaagt tattaaagcc gcggcagcca ataaaaatcc  
116221 cataatagct tgatctcttg atactthttac aggatcgata taagacctta ctatthcaaa  
116281 aaaagctact cttgaaacc tagaagaatt taaactagca agtthttgaaa aatggctctc  
116341 tagtttgact ttgaaattht gtatathaa ccctgtctga ctcaactctt taaccaatac



116401 atcattgttt aaagtcgata aaattgattt tttactatca ccaatagctt gagtaaatac  
116461 acttgtattht gcatcagaaa ctaatgtttt ttctatgatg gcaaattgca tattaatact  
116521 ttttgaaaga ttatthttctc ccaaattacc gagtaaactt tgtttggttt ccataatttg  
116581 atcatatgca ggataaattt tagaattaac ataatttact ataggatttc ttacaacatc  
116641 agaaattggt gtggcataaa acacaaccgc taaaacagta ataagaaaaa tgcgtactga  
116701 aagtttagca cctggcctat cttcgcctatg taagatagca cccgcatctt taacaagacc  
116761 tgcttttagg cgttcttgat aaactggatc tttacttaaa tccataggag tgattaaact  
116821 cactataaaa gcagttatca tacaagctat aaaagtagta cctatccaaa ttccaattaa  
116881 agcaggataa ctccaaccaa atggttctaa aacccctc atataaacca cagccgact  
116941 tacaggagat gcagtaattc caatctgtga ggatacgacc atcaacgaaa gcggggcact  
117001 tggtttgata ttttgagatt ttgccacatc aactacaaca ggcatthaaag aaaatacagc  
117061 atttcccgtt cctgccaaga tagtaagcaa ccatccgcaa gctggggcaa gataattaat  
117121 aatctaggc ttagatctta aaatthttt tghtaaccta accatataat caagcccacc  
117181 agcttgttg atcgcagaaa tagctgcaat agctgcagct atgattaaaa ttacatccca  
117241 aggaatattt cctggtttca ttcccaaac aagcccaaa acaacaacac caagtcctcc  
117301 tgcatagcct atggctatac ctctaagcg aattcctata aaaattgctc caaggagaac  
117361 gattatttgc aaaattatca ttattgtatc cattggctag cttttatatt atthtttagc  
117421 ttccatattg ggatttaaca ttttgcagg agthaaaatt tcatcaattt gttccttact  
117481 taaaagccct cttcaagtgc cgatatcagc tactthttt cctgtactca tagcctctt  
117541 agcaatgctg gctgaatttt cataacctat ataaggattt aaagcagtha cgattcctac  
117601 tgagttataa acaaatcag acaaattht ttcatthgca ctaatgccat ctatacattt  
117661 atctgctaaa gtatgcattg ctttttcaag cataacaata gaattaaaca agctataagc  
117721 aattacaggt tcaaaaacat taagctgtaa ttgtccgcct tcaattgcaa aagtaacggg  
117781 tacatctgct ccaattactg cgtaacaaac ttgatttacc acttcaggga taacaggatt  
117841 tactttacct ggcatgtag agctacctgg ttgcattttt ggcaattga tttcattaag  
117901 accgcatttt ggaccactgc ttaaaagtct taagtcatta catactthtag aaagthttgt  
117961 ggcaacgcgt tthaaaacac ctgaaatttg gacataagct cctgtatctt gagttgcttc  
118021 gataagatct tctgccacag tgtattcaaa gccggttact tctcttattt tctttctac  
118081 tactthttgga taattaggat gagaattaat acctgttct atagctgttc cacctagatt  
118141 gatttctaaa attagthttc tagcttctaa aactctthgt atatcttcac ccatcatcac  
118201 agcaaaagtt ttaactcgc gaccaaagt cataggtact gcatcttgaa gttgagttct  
118261 acccattttt aatacatctt taaattctt tgctthttct tcataagcct tthtaagatg  
118321 ctccatagct tttgctaaat cacttagata atcatgcaaa gcaagatgca aagcagtagg  
118381 ataagcatca tttgtacttt ggctthaaat tacatgatcg tttggatgaa ggtattgata  
118441 ctacactttt ttatggccca taagctcaag tgctatattg gctataactt cattggcatt  
118501 catatttgta cttgttccag ctccacctg tatcatatca actacaaatt gatcataata  
118561 tccgccctct aaaatthttat cgcaagctt aatgatagca tcttgatata ctttatctaa  
118621 aagacctaat tcataatttg ccatagcagc tgctthttta acccttgcta aagctcttac  
118681 aaagcgtggg aaatccttht acctctcgtg tgaatatta aaatthttca ccgctctaaa  
118741 ggtttgcact ccataataaa cctcatcaga aatttctaat tccccgataa aatcgtgctc  
118801 tttcttgtt cccatttgaa accttcttg tthaaattht tatacaagct ttgctgcttg  
118861 tactcatatc agtataatca tattgthaaat ttggthtaata attgthtaat aatattaatt  
118921 cthtaaaaat actataaaa agactthttag gacaatthta ctctthttat atthaaattht  
118981 tathttatcaa ttgatttht ttatttctag tthaaattht atathtttct tagcttattt  
119041 gataaaaat acctthtagt tathtttgga agthttttat aaagaaatta ctataaacat  
119101 tgacgatatt aaaataaata acgattggaa agaathttta aaagaagaat ttagthaaag  
119161 ctathtttht gaaatcaaaa aacattatat acaagcttht aacaataaag ctatcatcta  
119221 tcctcttca aatttgactt ttaatgctth taatcttact cththaaacg agctthaaat  
119281 tgtactthta ggacaagatc cttaccatca acccaatcaa gctatggggc ttagthtttct  
119341 tgtgccttat ggtatcaaaa ttccgccag tctthtaaat atthataaag aathaaagc  
119401 agatcttgat atagaacct ctaaaagcgg agatthtaagt tcttgggcaa agcaaggggt  
119461 tthactthta aattccattc ttagtgttga agcaggaaaa cctgcaagcc atagthcatg  
119521 gggthggcaa gaatttagcg atcgggtgat atcaaaaact agtctthgaa aatcaggact  
119581 tathtttatg cththgggaa atthtgcaaa atcaaaaaa gctthaatcg atcaaaaaa

119641 acatttttatt ttagaagcag cacatcctag cccactagct agaacaggct ttttaggttg  
119701 caaacatttt tcaaaagcta atgaaatfff aaaaaattta ggaaaaaac ctataaattg  
119761 gcagttggct tagaaaaatt atataaatat ttttttaaca atttaaaaat aaaacaatta  
119821 atataaatff gtataatffa tcgttaaaat ataaaaaatt taaggagata aaggtgaaaa  
119881 cgataggtat tataggtgga atgagttttg aaagcaccat cacctactat aaaaccataa  
119941 atgaagctat taataatcaa cttggcaatt taaattctgc aaaaatttta ctctatagtg  
120001 tcaattttga agaaatagca aatttgcaaa aaaatggcga gtgggaaaaa gctgcacaaa  
120061 tcttaggaga gtgtgctaaa aaactagaac ttggcggagc tgattttata cttattgcca  
120121 ccaacacat gcataaaatt tttcatcaa ttcaaaaaa taaaaaatt cctctcgttc  
120181 acattgctca agtacagct aaaattctaa agcaacaaaa tatacatacc ataggcttg  
120241 taggcactca atatactatg atggaagatt tttataaaaa tgtattaaaa gaagaaaata  
120301 taaaaacaat tactcfaat caaacgata tgcaagaact aagtgatatt atctttaatg  
120361 aactttgtag ggggaaaatt aaagaaaatt ctaaagaaaa atacctaaa attatccaaa  
120421 aactaaaaga cgaaggtgct caaggtatag ttttgggctg cacagagatt ggattgttga  
120481 tttctcaaaa agatacaagc attccgattt ttgatacagc cctaaccac gcccttgatg  
120541 ctgtaaattt ggctttaaaa gattaatctt tctttttaga gataggacaa actcccaaag  
120601 gacaagcttg ctttctgtc caaactctta taggacatac gccaaaaata cctgtaagca  
120661 aaggaataaa tcctatcaa gccaccaag acgcataata aaccctata ctaaagataa  
120721 ccattgctag gattattctt attgttcttt ctaatttacc ctttcttct ctttttgta  
120781 taatttaatc aaagtataaa caaaaaaat tttattgtca gtgataaaag tcaactaaaa  
120841 taattaatct aaaaaagata caataaaaat taaattcaca aaggtagtct atcttgata  
120901 aggaaaaaat tttaaaagaa ttttttaaaa actataatct tgaaaacaaa gactttgaag  
120961 ctatgggtgga aaaatcatac tttaaagaat ttgacaaaaa tacaatttta gatgattgtt  
121021 taggatttgt gatagtttta aaaggggat ttcgtgcatt ttttttaggt caaaatgcta  
121081 aagaaatcac tgtttttaa ctgaaacaaa atgaagaatg tgtcatttgt tctcattgta  
121141 tctttgaaac tatactttat aatctcacct tagaaaagtt tgacgatact caaattttgg  
121201 ttgttctgt aaaaatatat tctcaactaa aagataaata tcctttgata gcaattaca  
121261 ctcttaatct tattgcaaaa cgctttaatt ctttgatcaa ttttttagag caagcccttt  
121321 ttactcctct tcatcacagg gttaaaatgt ttcttaaaga aaatgcaaaa gaaggaaaaa  
121381 tcactttcac tcatgaagaa atagctttgc atttaggtag cactagagag gttatttcac  
121441 gaatttttaa aacaatgcaa aaagaaggtt ttattcagca aaatcgtaa gagattcac  
121501 ttttaaaagc tttgtgata atgccatat aaaatatggg caaaattgca atattttgaa  
121561 aagatttaat ctaaatcgg ttaaactctt aagaacttta tagtttgta tcttttcta  
121621 attgattgat attaagcatg ataaatttat agcttacata aatcaccaa ggccaaacca  
121681 ataaaaaaa agcgtgtagc attttttctc ctcatttaat ataagtgtt gctgtctttc  
121741 atttcttgc gagtgatttt tactctatcc attgcattcc aacataaac aatataagct  
121801 aaaacaaaag gcacaagcaa agatacataa gccattacac taagggtgta ataactcgaa  
121861 ctgcattgt gtatggttaa agaactttgt aaatcactaa gcgaaggata aaaagcatt  
121921 gatccaagc ctatgcttaa aaataaagca aaaacggta aaaccgatcc aaaacctaaa  
121981 gtaaaaatcg ttttagaaca tccctttgat cttgtatca tacctaaaag cacaaataca  
122041 actccaatga taataaaat agcaaaaaga atattatcta aaaaattgta taaatataca  
122101 ttttcagcca tactcacaat gcccttttca tctactcaa aaccttctt tataaaaatc  
122161 catgcaaaa atcctaagaa aaaaggtaaa aataaaatc tttttact aagttttta  
122221 acagcttttg ctttaatatt ttcatctttg atattattca taaaataagc agcaccctaaa  
122281 attctagata aaaacaccaa agcaatacc aaaagataat taaaaggatt aaacaaaagc  
122341 tccaaaccgc gtaaaggatt ttgccaagaa acaaaattgt gttcatttaa taaaaatgc  
122401 gatccactaa aaaaactgct tattgcaacc ccgattaaaa acactcctaa ataaccattg  
122461 attttaagaa aaacttcata ggtttttagaa ccataaacat tgttttctt tttacgatac  
122521 tcataagcaa cagcttgcaa aataaagcaa aataaaatc aaagccaagc ccaataagct  
122581 ccaccaaagc ttgtgctata aaaaagtgga aaagcagcaa aagcagcacc accaaaaagt  
122641 acaagagtag taaaaccaag ctcccattta cggccaagt aatttacaag cattgttttt  
122701 tcaagttcat cagaacttaa ttcatcaatt aaggtttgac ctcttgaac aaaaaacata  
122761 aagacccaaa gtccgccc aaactttaa atcaccacc aataaatttg tagtcccca  
122821 agttctaac cgaaaaacat ttttttctc ctttaccat aagagtacta tgtcctgcat

122881 ggcgctcaaa accttttttg atttgagtaa gcatgatctt aatctctgca atcaaaagtg  
122941 cagtaaataa aactgcaaaa atccaaaatg aaatttgaac attgactttt ccaagctcgg  
123001 ttgctgctac atgaacaggc attaaatctt gtatagccca aggctgtcta cccacttcag  
123061 caactatcca tcctgcctct gctgcaatat atcccaaagg aatacacagc aaacaaagcc  
123121 aaagaatfff tctaaatfff tcaatatcat ttgccatagt aagataaagc gttgcgataa  
123181 aaagtaagaa aaataaactt ccaagagcta ccatgatatg aaaactataa aaagttaaag  
123241 ccacaggcgg gatagcatct gttggttttt ctaaataacc ataaccaaaa tctttaaaat  
123301 tcgcctctaa aatacttttg tgaattgcca tagccattgt atcgttatta tctttagcca  
123361 atctataatc ttttaaggcc tgtatagcga tttttccttt atcgatgcgt tcttgcatag  
123421 gttctatacc cctatcttcg tttccgtgta ttaaactctc aatgcctggc acaaaaagaat  
123481 taggatcacg atttccta atagataaag cataaggtat agtaatatca aataaaaaaca  
123541 cactttcatt attgtctata gttttcttag gatttaaaat tccaaaagga acaagtcctg  
123601 cacgggtgctc accttgataa accccttcca tagcagcaag tttcataggt tgtgtttggg  
123661 taacacgata agcactctca tctccgctaa aaaataagaa aaccgaacaa acaagcccaa  
123721 aacttgacc cacaactaaa cttttcttag cttcgataat atgacgcctt tttaatataa  
123781 accaagctga aattcccac acaaataaag cagaaatcac ataaccgcta cctatgggat  
123841 gtaaaaatfff agagattgct acaggagaaa acgcgacttc aaaaaagctt tgcatttcat  
123901 ttcttgctgt atcgggatta aattgcattc ccacagggta ttgcatccaa ccatttgcaa  
123961 ccaaaatcca aaatgccgat aaattactgc ctatagccac acaccaagtc gaaacaagat  
124021 ggaatftctt agaaacttta tcccaaccaa aaaacataac agcaaaaaag gtagcctcta  
124081 agaaaaaggc cattataacct tcaactgcta aaggagcacc aaaaatatca cctacaaacc  
124141 agctataaatt tgcccagttg gttccaaatt caaactccat aataatgcca gtagctacgc  
124201 caatagcaaa attgatagca aataaagaaa gccaaaatft agtaatfttt tttcatcttt  
124261 cattgcccgt tttgacataa atagtttcca taatagcaat gataaaaagat aagcccaaag  
124321 tcaaaggcac aaataaaaaa tgataaagag cggttaatgc aaactgcgct cttgaccaat  
124381 ccacactgct aagttcactc attatfttct cttgataaga ttttctatga caaaattact  
124441 tttttcatta tcattftftaa agatagaatt gaaatfttaca tcaaaaaaca aaagtttaag  
124501 tatgacaagc attataaaaa gttttataaa aatgattfttc cataaagftt tttcaagagt  
124561 aaggftftfta aacccttctt tgtaaaagtt aaaaatftgc ataaaaaaga aataaaaaaca  
124621 ttttaaaatac attaaattaa acctataaaa ataataaaaa tttaaatftgt aaaaaagctc  
124681 aaaattataa tgaaatfttat gttattaaat acttaaaaaa atattattaa atftttgatct  
124741 tggaaaaaaa tattgtataa aaaacactac aatataatftt taaaaattca cttfttaatt  
124801 gattaaatcc ttaaaatftt gctftttatca caaatgaaat tfttagtftgct tftgtattata  
124861 aattctaaat tfttagtaatt aaccaacaaa aatattctat aaaaatcaca aaacaaaaag  
124921 agatfttact ctattatag tftatftftt atattatatt tatatftftt tatactctat  
124981 atgttaccaa attgcacaaa ataatacata agacgctfta taatftftt taaaatftta  
125041 tttcattata tatatftfta gaatftgtta gaatgaaaag aaactfttaat gaaaataaaa  
125101 caaaggagaa gacacattat gtggcaacaa atfttatgact cattcaatag cattftggctc  
125161 agcgccttat tftgctftftt acctatftt tgctftfttag cttgftftggt atftttcaag  
125221 ttaaaaggtt atcaagcggg tftftftaacc gtggftfttg caagcgttat agctfttatt  
125281 gtttatgata tgccttgtaa tfttagtaggt gctagftftg tacaagcctt tacaatggt  
125341 atgtggccta tagcttgat tattatcgcg gctatftftt tttacaaact ctctattaaa  
125401 tcaggctctt ttgagataat taaaaaaagc gtgatgagca ttaccctga tcatcgtatt  
125461 caagtgattt tgataggtt tftgftftggt tctftcttag aagggtctat aggtfttggc  
125521 ggtccagtag ctatcacagc agctctftt gtcggacttg gtttgcgcc tttacaagca  
125581 gcagggtctt gtcttatagc aaataaccgc cctgftgcct tftggtgctgt ggggattct  
125641 atcatcgccta tggcaaatft agtaggagtt gaagctcatt ctgtatctgc tatggtgggt  
125701 agaatgctt tttcacttag cttactata cttftfttca tagtftftt aatggtggt  
125761 ttaaaaggag taaaagaac tfttctgct atfttagtft cgcattaag ctttacagcg  
125821 acccaatftt ggagctcaaa tcacctagga gctgaacttc ctgatattat ttcagctatt  
125881 gtttctfttag cagttacaac tatctftfta aaatfttga aacaaaaaa cattftftaga  
125941 ttagatggag aaactcatt tactgaagat aatacftta atfttggaga tftattaaaa  
126001 gcttggacac cttftatftt acttataatt tftattatca tftgactca accttggftt  
126061 aaagctatct ttgataagga tggftftfta agctatacaa gcattactftt acaatfttag

126121 aatcttacag gcggtatfff aagtcctct atcacaggta taggcgaagc taaacctctt  
126181 tctttaggac ttggaatcga tcttatcaat ggtaaaactg tagcccaagc aggaactgcg  
126241 attttgcttg cagctfffft aaccatagct gttttaagaa taaaagctga agatgctgct  
126301 gaatgfffft gggccaccct taaagaaatg gctatccctt gtcttaccat aggtttggtt  
126361 gtagcctttg cttttatffc taaaaatagt ggtatgagta ctactttagg acttgctfff  
126421 gctcatacag gagatgcttt tgcatcttt tcacctatta taggttggat tggcgttttc  
126481 ctaacaggat cggatacaag tgctaactta ctttttgga ccctacaaca agtaagtgcg  
126541 caaaaattag gcgttagcga agctttattc ttggcagcaa actccgtagg tggggtagta  
126601 ggaaaaatga tcagccctca aagtatagct attgcttgcg cagctgttgg acttgtgggt  
126661 aaagaatcag atcttttcaa attcacactc aaatactcta tagcttttat cattttaata  
126721 ggaatggga cttgcattat cgcattcttt ttaccaggaa tcattccaga agtagtagct  
126781 aaataaaaaat aaacttgcaa gacttattct tgcaagttta agcaaatfff aatgaaaaa  
126841 attttgaaaa tatttttatt attgatttaa tttttatfff atttttctaa agctagaata  
126901 attgtttata ttaaactctt taaaatcaag gagaaaagat gaagaagggtg tatttttacg  
126961 ccacatgctt aggaactgct gctatgcaag aaagcgttct taatggtatt aaacttttgc  
127021 gccgagaagg agtggaaagt atttttaaaa aaaatcaaac ctgttgtgct caaccctctt  
127081 ttaattcagg atattttaat gaaagtcgcg aaatagcctt atacaatgta gatttatttg  
127141 ataaagacta tcctatcggt gtacctagtg gatcttgcg aggtatgatg agtcacgatt  
127201 ataaggaact tttcaaggat agacctgaat tttctagagt gaaagatfff agctcccgtg  
127261 ttatagagct ttcgcaatat cttgatgaag ttttaaatgt aaattatgaa gataaaggag  
127321 agcctattaa agtgacttgg cattctaatt gccatgcttt aagagttcaa aaaagcatac  
127381 aagcaagtaa aaacctcatt agaaaactta aaaatggtga actttagtaa ttacaatacg  
127441 aagaagaatg ttgcggtfff ggagggactt tttctgtaaa agagcctgaa atttcaaatg  
127501 ctatggtaag aaataagatt aaagatatac aaaatactgg tgtaaaatac ctcatcagtg  
127561 gagatgggtg ctgtctttta aacatagatg gaacctgcg tagaatgggt ttggatgtta  
127621 aaggcataca cttgtatgaa tttttatffa agcgtttgga aggagagaga ttatgagtca  
127681 aaaaattcca cacgaagaaa ttgttcatat taaattaaac gacattcaaa tgcgtgaaaa  
127741 tttgatgact gctatgcata ctttgcaaaa aaatagactc ggtgtcatcg atgcaagatt  
127801 tcaggattgg caaggattaa gagccaaagc aaaacaagct aaaaacaatg ctttaatgag  
127861 cttaaaagat agacttttag aatttgaaaa aaacgctaca aaaaatggta tacaagtaca  
127921 ttgggcaagt agcgatgaag atgcttgtga aatagtctat gagattatgc gtgaaaaaaaa  
127981 catcaccaag cttttaaaag gcaagtctat ggcgagttag gaaataggct taaatcatta  
128041 tttgaaaaaa aaaggtttaa aagccataga aaccgatctt ggagagctta ttttacaact  
128101 caacgaagaa ctccttttgc atatagttgt tcctgctatc catagaaatc gccatgaaat  
128161 aggtcaaat tttaaagata aactcgggtc aaaattagaa aacgacgagc ctgaaagctt  
128221 aaatgccata gcaagagatc acttaagaaa agactttgag ggtttaaagt tagggcttag  
128281 tggagtaaat tttgcaatgt caagagaagg ggctttttgg cttatagaaa atgagggaaa  
128341 tggtagaatg tgtaccacgg cacctgatat tcacatcgca ctttgtggcg tagaaaaagt  
128401 tatggaaagc tttgaagatg cagcgactat ggtttcttta cttactcctt cagccacagg  
128461 acaatttata ctacttata ataacatcat cacaggcccg cgtaaaaatg gagatttaga  
128521 tggcccaaaa gaagtgcag tgatfffatt tgatcacaat agaaccaaaa tgctagctca  
128581 taaagattat tatgaagctt tgcgttgtat tcgatgtggg gcttgtatga atttttgcc  
128641 tgtttatgat caaatcggcg gacacgcata ccaaccacc tatccaggcc ctattggtga  
128701 agtaatcagt ccaaatatft ttggtataga tcatacaggt gatatfttaa atttctgttc  
128761 gctttgcgga cgctgctcag aggtttgtcc ggtgcaaatt cttttggctg atctgattag  
128821 aaaactaaga tgcgataaaa taggacaagg agaaaatcca cctatgggtg caaaaaatat  
128881 ccatcataac gcaatggaag cttttgcatt caaacaattc aaaaaagcag caacaaaagg  
128941 cgaaaggtgg cgttttgcac tttcaaaagc gcattatfff aattggtttg tgcaaaatft  
129001 atcaggagct ttaccggtga taaaaaatg gtatgctfff aaagaattgc ctcaaatcaa  
129061 gaaagatcta tataaagaaa ttcaggctat agaaggggtg atttatgagt aaaatcaatg  
129121 aaatftctaa caaaagcaaa gaaaaatft tatcagcact caatgaagct tatgaagcaa  
129181 aagatfttac ttatcaagcc agtatagatc ctgtagaaca tattcaaca aaagaagatg  
129241 ccttagctga aatgaagcaa aaaatgagtg ataataaata cattgttgaa aatgctacca  
129301 aagaaacctt ggaagaaaa atcaatgaaa ttatcaciaa atacaactac aaaaaaatga

129361 tatacggcac tgatttgggt ttggatttaa acaaaattca agcagaagaa aaaatttgct  
129421 ttgataagga aattgaaaat ttacgatatg aagtttttca tagcgatttt tctatagtcc  
129481 atgcaagggc tggagtaagc tctcatggcg ttgctttgat accttcaagt aaaggacagc  
129541 ctagaatgct aagtcttgca cctaagcttt gtatagtgtt gttaaaaaaa gaagacatag  
129601 taaaaagcct tagtgaagct ttgaatttgg taaaaacaga aatgaaatt ttgcctacaa  
129661 atattttatt tatcgcaggt ccttcaagaa cagcagatat agaattaatc actgtttttg  
129721 gcgttcatgg gcctcaaatt gctcatattg taatttatta aaatttagct ctagtgttat  
129781 ttgctagagc taaaattggc ttaagttaaa taaatattat acaagataga ttaaaaattc  
129841 tatatcttaa atatagttaa ataagaatat ttatatccta ttttaattata tatcattttt  
129901 aatattttatt taatataaaa tacgataaca tacctcaata tcaaaatatg caaataattg  
129961 aaattttatt ggagaaaact ttggataaat taattcctgc ttgggatgaa aaatacagca  
130021 taaatgatga gaaaatagac gcacaacacc aaaaactttt tgaattagct gctaaaattg  
130081 aaaatgctgt ttacaaattc gttcaacgcg atgaacttaa agaaattctt accgaactct  
130141 ttaattatat gaaagaacac ttcagtaatg aagaggatta tatgcaagaa atttcttatc  
130201 cttattttaa tgaacataaa ataatgcata aaaacattat ccacgatatg tcacatctta  
130261 tccaaaacat aaagactaca aatgatttaa aagaaaaact ttatactata atgtcagatt  
130321 ggttattaga acatattttg catcatgatg ttatgatagg aaattggctt tcagagcaat  
130381 tattggccaa acaagaagaa gaattagaaa aacttcagca agaagatctt caacaagaag  
130441 aaaaacaata tgaaaataat ccaaatccaa ttcctcaagt caaacagaa tatgatttta  
130501 tctattcttg tccttgtagg acaaatcact ttctttcata tatagagcat cttgatatta  
130561 tttgccataa aaaacaacta agatgtaaaa aatgtcaaaa aaatctattt tatgtaagaa  
130621 gtgaaatcaa aactgaaaaa aggaataatg atgtttcaa agtgggatga taattatagc  
130681 gttcataatg ccaagattga cgagcaacac aaaaaacttt ttgaactagc aggcaagggt  
130741 gaatttatgt ttgatcgacc cgtgtataaa gatgatatca aagctctatt ggctgatttt  
130801 ttttaactata tgaaagatca ttttaatgat gaagaaaaat acatgaagct aataggatat  
130861 cctgatttgg aagaacataa aaagatacat aaagaaatca tccaatctat gatagacctc  
130921 attaaaaaca taaagtcaac caacgattta aaagaaaaac tttatacagt ttctaaaaaa  
130981 tggctcttag agcatatact ttatgaagat atgaaagtag aacaatacag acgctcttct  
131041 ttatcctctg aagatgacag cgaagtcagt tttgaagaag taaaagaaga aaaagacgat  
131101 gaaacggctt tgtattttta tacttgcgaa tgtgttggac aaattcacga tgtgcctttt  
131161 ggaattcatc aaaaaatata actaaaaggt gctaaattta aatgcaaaaa atgcaaaatg  
131221 gccatacaat tttataaaaa acattccgaa tcttttgaat aataaccatt ctatagtaga  
131281 ataaaataaa aaaataattg gtttactat gaataaaaaa ataaaatatt atatctcaaa  
131341 taaaacaaag tattcttatc ctattttaac caaggaagtt caatgtttta attgtaaaaa  
131401 attttactcg atcgaatag cttcgaatth gaaaaaaata gaaaaagaat gcccatcttg  
131461 caaaacaaaa atggacatta agcttaaaga ttagtthttt gccttgctta caatattgat  
131521 gatattttga gcaacttcat cagcaagttc taagtgtgag gtaaagccta cgcaagaaca  
131581 atttatctca ctaaaaacat acttatcgtt gcccttttca tcattatcca aaataaaatc  
131641 agccgtccaa ataagtggta aatcataatt gcctaatttt gcacgcactt taggaagctc  
131701 tcctaaaaac atatctacca aattttgcca atcctcgggt ttatcatagc gatattgcmc  
131761 cccactaaaa agtgtagcag aaaaagcadc agcatcttcg gctggthttt tatggactac  
131821 atttacagga gtattataaa gcattaaaag tcttatctcc cttcttttga tacgtggtaa  
131881 aaaagtcata tccacaagca taccattatc acctataatg tattgctcgc aaaaatccat  
131941 aaattcacc aattctctgt gctctacatg attgtctttt gcttcgggtc attttatttt  
132001 agtatctaaa ggtaaaactt ctctttttgc ttcaccctct acactcacac gccaaattcc  
132061 ctacactgta gagccacgat tttgttttaa aactctttct cccttagcta aactttttgg  
132121 aaaattttct ttaaaagtct taatatcata gtatgcataa gtatcacttg gcacaagatc  
132181 tgtatctgca agttttgtta aagcatcttt tgccccataa cctatcatag catcaggatg  
132241 aggcatacca acaagacctt cttggcaaag ttttcttaac atatcaaaat actcattttc  
132301 ttctttaaga ttgccaggat tgatgcgcga aacatagcca tcaaaattht ctttcacata  
132361 attgtaaaat tcatcctttt ttcccacttc aaaaaaaatc acctcggcat tccaaccctt  
132421 agctthttaa gcattttacca taggcatagt atctthtctg tagccatctt cacccttatc  
132481 gctaccgcct ctaacctcaa aaaagactat atthtthtctc attgcacact gctcctthta  
132541 gthtthtaata taacaatta thtcataaaa atgtthataaa agthtaaacga ataagagcct

132601 ttttctccta taaaacacaa aaatttagaa ttatatttatt ttaattctaa ggcattcgca  
132661 ttcaatctaa gtataacatc gccattact ttacttaaaa aattagaact ttggctttct  
132721 aaacgattta aaaatctatc aattctacc tcttctttcc aaataggatt taaaacttta  
132781 gcaagttctt gaagttcttt ttttgcattt tcataattgc ttaactcatc aataagccct  
132841 aaatctttcg cattttgtgc taaaaatacc cttgcgtttg cccaatcatt tcttttgtct  
132901 aattccaaat tgcgctcttt agctacaaat tccgaaaaaa gatcataact ttcattgatt  
132961 aaattttgca agaattctcg ctctttttca ctccaagccc ttgtcaaagt tcctgcgctt  
133021 ttaaattccc ctgcttgat gggtttgttct ttaattccta ttttcttagc caactcactc  
133081 aaatcagcac cctgcataat cacacctata gatcctataa aactagcagg gtttgctaaa  
133141 attttatttg ctctactcc agccaaataa ctcccactcg ccatagttcc acttgcataa  
133201 gctataacag gttttttagc ttttaaactt ttaatcgcca aagctagctc catacttggc  
133261 gcaaaagcac ctccaggaga atctatcaca aaaagcacgc ctttgatatt gtcattattt  
133321 ttagcattga taattttttc taaaacttct gagctatcta gtatctcacc ttttaaataca  
133381 atgcgttcta aattggcata agatgagttt gagtttgaac ttggtgtaaa aagccaaact  
133441 acgatcaaca ataaaacaaa agtttttaaaa taggtgttga taaattttat cacgctgcct  
133501 aaacccttaa aaaatgattt taaaatttgc attcttttcc ttttataaat aatttttgta  
133561 cttcttttagc atttaaaata aattgcaatg gtgcttgctc cttgtcacat tcccctagct  
133621 caatacact aaaatcagct atttttccct gcttgatttc gcctaaattht aaatthaaag  
133681 ctttggccgg ataaagcgtt gccatttgca aaagcttagg agctaatttt aacaaatcaa  
133741 aattggatg cacaagcaaa ttagcacgca tttcatctaa aatcgataaa gaaatattag  
133801 aacttaagcc atctgtaccc aaatggatat ttaaaccgct ctttaaagcc ttttttaaat  
133861 caaatgtttt ttgacttaaa agacgatttg aaaaagcaca atgggtaata gaatgtaaat  
133921 ttttatcaag caaatccatt tcttttaaat acacacaatg agtaaaaagc gtcctaatagc  
133981 ctttgaataa ttggataaat tcactaactt tataaagtgg cttaggattt ggtgtaaagt  
134041 ttttaaacca ttcttttaac cctccttttg cctctttaag ccaagcattt tcagccttac  
134101 tttctaaaaa atgcgtgctg attaataact tttgcttttt agcaagattg gttgcaaatt  
134161 ttgcaagttc gggatgggtt gaataagcag aatgcacaga aatagcaggc ataaaaaact  
134221 catctttaa ttttaaagaa ttttcaaact ttgttaaaaa ctcttgtttt ttatcttgaa  
134281 tttgggcttc atttatgcct aaaatthcat taaaaaatat aacacgcatt ccattttgac  
134341 ttgctttaac acaaggattt aagtcactgc caaagcttga aatthcacct atggtaccta  
134401 taccgctttt ttgcatthtt tgtatatttg tcaatataag ctcttcttta gcttgctcat  
134461 ttaacataga acgagattta atcacacttt taagccaagt taaaaactct ccaaaatgca  
134521 aagtagtca atttgcactg aattctaaat gtgtatgtgg attgataaaa gcgggtaaaa  
134581 taacacaatt aggacttggt tttataagct tagcttttgg gtatcgtttt ttttaattctt  
134641 ctaattcgcc taattctaaa atthttatcct caaaaacaaa ggctttattht tctaaaatac  
134701 taaattgctc atcgcataaa aagatatatt ttgactgat tatatacatt cthttttctt  
134761 tgaataaaaat cacattgtag cgaaaattta ttttaaaatg ttataataaa aggttaaaaa  
134821 taaaaattht aaggtgaaat tatgaaaata atggtcatcc aaggccaaa tatcaacatg  
134881 ctaggcgtaa gagaagttgg aatthtatggt gcaatgaaaa tgggaagacat tcatacgcaa  
134941 atgaaaatgg cagcttccca aaacaatggt gaattagatt tthttcaaag taatthtgaa  
135001 ggtgaaattg tagataaaat tcaagaatgc cttggcacag tagatggtat catcatcaat  
135061 gctgcaggct atacccatac ttcagtagcc atccgcgatg cgatttctgc agtagcttht  
135121 cctactatag aagtgcataa tagcaatggt tatcgagag aagaatthcg tcaaaaaagc  
135181 cttatagctc ctgtatgctc tggatctatt gtaggatttg gtcctthttg ttatcactta  
135241 gctthaatgg gtgttattca aatthtgcgag caagtaaaaa acttgcgtgc tgcacaagca  
135301 cagcaaatgc aagctggggc tcaaaattta aaatgctaaa aataaaaagga gcaagacgac  
135361 ttgaaacaag ccgtthtttt cttatthtt gcaaaaagaa aaaaggattt aaatatcttg  
135421 ctctagtagg cttaggaagc aatatagagc cagaaaaaac aagattthaac aagctthttc  
135481 gcgtgatgat ggaagataaa aggtthtaaa ttctagccac atctccattt ttaatcaatg  
135541 aagctthttg cthtaagct caaaaagact tcaccaatgc aacaatgctt atgcaaacaa  
135601 atctacacgc aagagcttht ttgaaagttt tgctthttta tgaactthaa ttcaagcgaa  
135661 aaagaactth caaaaacgc ctagaacac ttgattthaga tctthttatat tthttcaaaa  
135721 aagtcaagcg tgatgagggg tgtatggtgc ctcataggg ggccaatcaa agaataagtg  
135781 taatthtgc cttgggctta acaaaaggtat tataaatggg acaactthac cataccttht

135841 ctgtagaaga tacagagcaa attatcccga aagtaaaaga ggattatggc gacaaagcctt  
135901 taattattac caataaacia attcgtccca aaacacttaa ccgctgctgtc ctttatgaag  
135961 taatggttgc catagaagag agtgattatg aagagcattt gaaaaaaatg gggaaatcct  
136021 tacctcctaa aaaaactatc gctaaaacc tagaaaaaca aaatcttgaa gaaaaagtca  
136081 atgcttcaat accacaaaat aatgaagatg aagatgttat ccttgatttt tcaataacta  
136141 gagcaaattt agcaaaaact aaaactaacg atactaatta ccaaagcttt ccacaaagta  
136201 aatcaatcc taatcccacc atgggcttta atgattttta agaacgcttg agtgaagtaa  
136261 gcaatgaaat ttcaaaagta accaatacc ctttagtgga taattacgcg cccaatccaa  
136321 actataacia aaaaatagag aatthtgaaa aacaaatcaa taaactcaat gataaaatcg  
136381 atttacttgc agatatgatg tgggatgaaa aagcagaagc tcgcaacaat cttatcattc  
136441 ctctgaatt tgcaaccatt tacaanaaag ctaaagaaag cggatgctt gaaaagcatt  
136501 tagaagctat catgaaagcg actatagaaa atatgcctgc ggctatgaaa acaaacaaag  
136561 acgctgtgca acgatatttt tattctcttt tgagaaatat tttacctgca cgagtagaaa  
136621 gtgaaatcaa aaaacaaaa attatgatgc ttgtaggccc aacaggagtt ggaanaacta  
136681 caactctagc aaaactagct tttcgtatg cttacgggga taagcgttat aaaacaggta  
136741 taatcacttt agacacttat agaactcggg ccgtagagca actttttcaa tatgcaaaaa  
136801 tgatgaaact tcctatcatt gatagcatag aacaaaaga tttagacgag gcgattaaaa  
136861 gtcttaacia ctgcgaagta atthtagtcg ataccatagg aaattcacia tacgatcaaa  
136921 acaaacttgc caaacaaaa gaatthctca tgcattcaaa tgctgaaatt gatgttagcc  
136981 tagtcgtttc tgctaatacc aaacacgaag atthgatgga aatthcaaaa aatthttcat  
137041 tthtaaatat cgacactctc atcatcaaaa aatthgatga aacaaaagtt tthgaaata  
137101 tthctcttt aatthatgaa actaatatcc cgctaagctt tthctctaca ggacaagaag  
137161 tthctgatga tatagaagta gcaaatagcg atthtttagt tcgctgtatc ttagaaggtt  
137221 ttaaaaagg aaaagataat gaataacaa gcaataaac tccgtagcct tatgaatcaa  
137281 aatggaggaa aaaaatcaca aaacactcat tthtagcga ttacaagtgg aaaaggtgga  
137341 gtgggtaaaa gcactatcag tgcaaatthg gcaaatgtgc tagctaataa tggatataaa  
137401 gtaggacttt ttgatgcaga tattggccta gcaaatcttg atgttatttt aatgttctg  
137461 attcaaaaa atctthtaca tgtthtgccg ggggaatgct cthtagaaga tathttaatc  
137521 gaagtaaagc caatthtatg gctcatccct ggtgaaagt gtgatgaaat tthaaatac  
137581 aatgataaaa acatthtatg aagatthttt aatcaagcaa gcathttaga tgaacttgat  
137641 tthcttatca ttgatacagg tgcaggaata ggaggaaata tactgaatth cthgaaatg  
137701 tcagatgagg ttgtagtagt aaccgttctc gatcctgctg caattaccga tgcatacgca  
137761 actatthaaa ccacttctaa gacaaaagaa aatthgctta tgctgtthta tgttgtaaaa  
137821 aatgaaatg aggcctthaaa ggtthttgaa aatathaaa aagttgccga tgcaaatatt  
137881 aaaaatcatc taaaattaga atthtttagg catttaagcg cthcaaaaaga tghtaagcgtt  
137941 agcathaaa aacgcacctt gthtacagat gaaaattctg cthcaagtga tgagctthaaa  
138001 gccctagctt ccaagcttht atataggttg gaacggaaag tgcttgataa tgtcacgagt  
138061 cgaagthttt caatthctt taggaaaatc atcgaacgat tthtagcaat aaagagaaga  
138121 tattatgaga cctgaaaatt atgtagcatt tthtactgtt tgtggatttt ttataggatt  
138181 ggctthtagt gtgattagca ttgaagaagc tthtgatatt ttgattthta cthgtthtat  
138241 tacctthtat tthtatgttt ttatacacat tgctattatg aatthtatag atathaaaa  
138301 aatcagcggg cgaatthtca ataaacatga ttatgaaaag actagcaata atatacaaaa  
138361 cgatttagtc atctgtgaaa agaaaatgga tataatctta gaaaagctta acgaagaaag  
138421 agaagagctt aagaaaaacg aatcaaaaaga aagacgcaaa aatgcaaaaa gagccgccta  
138481 aagcttatgc tcaaatgata aaagatgaac aagatcagct agthttatcc tatatgcctg  
138541 cacttctgca aatggcttht aggtthaaagg agcgttgcc thctagcatt gatgtgaaatg  
138601 atcttatcag cattgggtgt gaagagatga tcaagctthc acgccgtac gataaagaac  
138661 aaaatgatag cthttggggg tthgctagaa agcgtgtthaa tggcgctatg ctcgatttht  
138721 tacgctcttt ggatgtaatg agtcgcaata accgcaaat tathaaagat atcgatattt  
138781 taatcgatga atathttaga gaacacgaag aagacctga tgatgaaat ctagctcaaaa  
138841 aacttgctt ggatatagaa aagatcaaa aagtacgcac cgcacatgct attagttata  
138901 cthtatctat cgatgatcaa ttagaactth ataatgaaga tgatactth gaaaatttag  
138961 aaaaagaaca actthtagaa aaaatthcat aagattaga agatctthaa gagcgtgatc  
139021 aactcattat ccaacttht tattatgaag aactcagcct taaggagatc agtgaattht

139081 tagagattag cgagagtaga atttcacaaa ttcataaaaa acttttataaa aaacttagag  
139141 aaaggctagt gtaatggcag aaatactctc ccaagaagaa attgacgctc tacttgaagt  
139201 tgttgatgat aataccgata cgcctacagc ctccaattca aaagatggaa aagatgaaag  
139261 aatatatagtc gtatatgact ttaagcgtcc aaatagggtta tctaaagagc agcttagaac  
139321 gatcaaaggt atacacgata aactagcaag aaatntagct tctcaaattt catctatgat  
139381 gagaagtatt gttgaaacca agcttcactc ggtggatcaa atgacttatg gtgagttcct  
139441 gatgtccccta ccaagcccta caagctttaa cgttttctct atcaagcctc ttgatggaaa  
139501 ctgcgtttta gagattaacc caagcattgc tttccctatg atagatagac ttttaggagg  
139561 tcaaggcgat agctatgagg cttcgcgaga gcttaccgat atagagctta atttgcttga  
139621 ttcgattttg cgtattatta tgcaaagact taaagaaagc tgggctacag taactgaaat  
139681 ttatcctagt atagaagcta aagaatcaag cccaatggt gtacaaatcg tatcgcaaaa  
139741 cgaaatcggt atcatgggtg taatggaaat catcatagga aattcaagcg gtatggtaaa  
139801 tatctgctat cctgttgtcc atttagaaaag tatcttgagt cgtttagcaa accgcgatat  
139861 tatgatgggt gaaacttcgg ctaaaaaatc gcgtaacaaa gagcttaaaa ctctcatcgg  
139921 tcgtgctgaa gtagtttatg aagcgatttt aggaaaaact ctcatcaatg ttcatgaatt  
139981 tctagaactc aaacaaggcg atatcttaag gctagataga gaagctgatg ataaagccat  
140041 agtaagcata gataaaaaag atgttttctt ggcacaaaatt ggcttgcctc gctttagaaa  
140101 atctattaaa attcctgaaac ttatacgcac tgataaagat gaaattaaag aaattctaga  
140161 aagatatgaa gaggagcgta aggcaaaagc tagcgtttat gatgagcctg aagaggagga  
140221 agaagaaata tgatcaatga attttataaa ttatttacia acgaatgcac cagcacaata  
140281 gaaggactta cgggaaaaag tgcagaatth agcgaatata aagaatttga tgtttcatcg  
140341 caagatacac ttaagcccc tcttgtttat gcggttttta acatcaaaga aggtggtaaa  
140401 ataggtatat tagcaggtgc tgtgcttatg agtgctattg gcgaatggat gatgggagaa  
140461 gaagaaatth ctaaaaacga tcaactaggg cctgatgaaa tggacgctgc taaagaagca  
140521 attcaaaaca tcatttcggc tttttctacc actttaggcg cacaaaaaga catacaaaa  
140581 atggattttg aaatcagctc ttgcgaatth gtagcagaaa atgttgattt taaagatttt  
140641 acaaaactth atttctttga tgtcaaaata gaagacttag aagagcaaat ttctttgatt  
140701 gtagatcaaa ctcttcacia tattttaaagc ggcaaagctg cagatgatgg ccatgcacac  
140761 tctagctcaa attccgaaaa taaaggctth gagataagtg aggagcttaa aaatatcaat  
140821 ctcatcatgg atgtgcgtth gcctgtgcgt gtaagaattg gcaacaaaaa aatgctttta  
140881 aaagatgtht taaccatgga tataggctct gtagtagagc ttaatcaact tgcaaatgat  
140941 ccacttgaaa tattaatcgg tgataaaaga attgcttatg gcgaagtagt aatcgtcgat  
141001 ggaaatthcgc gcgttcaaat cacagaaatt ggctctaaaa aagaaagatt agaacaatta  
141061 agataattht tactaaacca tctatcattt ttgccgattt atcttgtaaa tcttattttta  
141121 caaggtagca aagatgatta atggatcaa ttcttattca agctataaatt acacaagcac  
141181 tttcaataat actttcaata caaaatcctc taatatcata aatgataaatt caaaccttgt  
141241 aagcgataaa tctggggcag taagtaaaat actaggctat ggtgtagata aagatggctt  
141301 ttttacaagc gattttaacg aagctgcagg cttacaaaa gattataaga tttatgctaa  
141361 agatatagaa aatthtgtht atattcaaac aaaaagtcta ttatcaagth atattaatat  
141421 tgatatagca aaaagtatag gaaatgctta taaagtatth tcacaactth taaatgatga  
141481 gthaaacaat aaaatcaatt ttacaaaaga agacttagta aaaataccac aaggtttcga  
141541 atthgatcaa aatactthgg agataaataa aaaatataat ttaaagata aagaatataa  
141601 agatthtatg tctaattatc aaaattactc tccgactthc cataatataa aaataatgac  
141661 tthtttctca cthgatgata aaagtgatat tthtaaatat tctthaatag atctactcc  
141721 ttatagthaat aatgataaaa ctataacaaa aagtggthatt tthtatgactt tctthactgg  
141781 atthcaagca aaaaactatth ttatcgaagg acaacaagth atthtaggca aaatgcaagg  
141841 atthgataaa actatgagthc aaagtgaaat tgataattht aacaaatthc taagtgaaaa  
141901 tagthtgaaat thtaaaaggaa atatthttta gctthttgat thattaatth cagatagthg  
141961 cattgatgath thtaaaacaaa aaatactaga acaaaaagaa aatthtaaca atctacaaa  
142021 aagcacaath aacaaagaaa cthcagaaga agacaaaaaa aagctthttta aacctataca  
142081 agcgcaagth tcaagcgaaa cctacaaaga tgatagthaaa atgaaatgaa tthtaaaaaa  
142141 gthactagaa actaaatthg gcacaagcga thgagctagaa atthctthttg gthtgaaatth  
142201 tagthgatgath gatacaggag aatthtaataa aatthctthct thaaatthctg caccaaaaag  
142261 tatagathatth aagctthaaa aatataaaaa tthaaattht aaaaaggath aaaaatgata



142321 ggtatcaact caactttcaa taactccttt gtcaatctta atattaaaa caataacaac  
142381 tcttccttaa attcaaatac taatgtaaaa aatttacaag atacaaaaca atactctaaa  
142441 acaagcaata agtttttgga ttatgaaata gataacgagg gttattttac aagtgatttt  
142501 aacgagaaag caggaattcc aaaagatata aaaattcatt ctagtactat ggaaaatttt  
142561 attaaggctc aaaataatgg aagtttaaaa agttatgcaa atatcgatat tgcaaaaacc  
142621 gtgggaaatg cttataaaat agttttctcaa cttgtagaaa aaactcccca attaaaaagg  
142681 aaaagtagct tttcaaaaga agatttagca aattattttc cacaaaacta cctaatagat  
142741 aaaaacactt tagaagtaaa acaaactttt tcttacgaag aaatgaaaga cattatcgca  
142801 aaagggtgat ttaaaaatat taacgagaat gaaaaattaa gtcctagttt ttttaatttt  
142861 gacaatacag atgaaaaatc agaactttta cttttcaatc ctgatatttt acatagtgtc  
142921 aaaaacactg ctttatcttg ggatactagt gctgataaat atacaaataa tgatggctct  
142981 attactatgg gtggtttatt aataggtttt ttatctaaca atgtgaatac tggagtaacc  
143041 gcacaacctt taattgctgg cgaacaacc gtatggggaa agttacaagg gcttgataat  
143101 tctttaagcg aaaatgaaat taaagaactt aataataaac ttagcaatac ttatttttca  
143161 aatttaagcg atgcttttgc attacttaat ggcacaagt atattaaaga atttgaaat  
143221 aaattaaata gtttaaatca aaataataaa acaaatcaa gtaatttttt agaatgggtg  
143281 caacaaatca ccaaggagca tcaaaaatct ttatgtgaaa ttctaaaaca accagataat  
143341 attaataaaa tatatttatt gataaatata gacataaggg cttaggcat tcaacttta  
143401 tgattttata taaatttaaa tgagcttatt tgaacctac ataaagaact tattataaat  
143461 ttttagctag aatgaaattt attttatcta aaggttgcaa aatggatagc aaaataagcc  
143521 aagatttaga aaaatttgct aatataccaa acctaaaaaa tgccataact ttttttggtt  
143581 ctgcaagatt aaaagaagat agtttttatt atcaagaggc caaaaaatta gctaatttat  
143641 gtgtagaaaa tggcctttgt gtcgttagcg gcggagggtg aggcattatg cgtgcggtc  
143701 atgctggcgc tgccaaatgt aaaaacgat caaatttat aaaatcggta ggttttaata  
143761 tacttttgcc ttttgagcaa aaattaaacg atttttaga atataacata acttttgaga  
143821 gcttagccat acgcaaatg gctcttattg aaaagagtct agcttttggtg attttccag  
143881 gcggccttgg aacacttgat gaattgtgtg aagtacttac actaaaaca cttggattta  
143941 aaaacaatgt tcctattatc ttgtttggga gtgaatttt gcaaggcttt gatgagttcg  
144001 tcagaaattc tttgctaaaa cttgaagtca tttccaaagg agacgagtt aagtatgaaa  
144061 tcaactgacga tttagattat ataatacaata ctttaaagga actctaataa aaattctagt  
144121 cgctatgagt ggtggggtcg atagcacagt cactgcttat aaactcaaaa atgcagggca  
144181 tgaagttata ggctgttata tgaacttca tggcaaacct aattatcatg aagaaaatat  
144241 caaaaaagta gaaaaagttg ccaatttctt acaaatcct tatcatgttt tagacttgca  
144301 agaagacttt aaaaataaag tttatatgcc tttttagat acttacaag agggtaaaac  
144361 gcctaactct tgtgctttat gcaatcgctt tattaaactt ggaaaactct tagaatttgc  
144421 taaaagttaa ggctgtgaaa agcttgctac gggacattat gcaagacttg aaaacaatct  
144481 tatccgcaca gctgttgatg aaagcaagga tcaaagctat tttttagcca gtgcgacaa  
144541 agaagcttta aaatacctca tctttccatt aggtgaaatg aaaaaagaag atgtgaaaaa  
144601 atttgcttct actatagaag ttttaaaatc atttgcaact caaaaagaaa gttctgaaat  
144661 ttgctttggt gaagatactt atgtgcaagt ttagatcaa tttatggata ctaaaattcc  
144721 aggagaagtg ctagatagta gcggtagggt ttaggaaaa cacgaaggct atatgcacta  
144781 taccataggc aaaagacgcg gttttgaagt gcgcggggca cacgaaccgc attttgtttt  
144841 aaagatcaat ctaaaacaaa atcaaatcat cgttggcacc aaagaagaat taaaaatcaa  
144901 tgaatttaaa ctcaaaaata tcaatctttt catcgatgca aaagaacttg attgcaagat  
144961 aaaaatccgc tatagatcaa aatctacccc atgtaaagtc attataagt atgataaaag  
145021 cgcgagcatt tctttaaaag agagtgttta tggcttagca agtgggcaaa tggcagtatt  
145081 ttacgatgat gataaagtca ttgagagtgg gtttatagaa taagacttat caaagcttta  
145141 aaagctttga taagatttta ataaaatccc aaaaatttc accatacaag tccaacaagt  
145201 atcattacgg ttatatctat caccgaaata acaaatccta cggaccacca ttttttaaga  
145261 ctacataaac ctgttccaaa aataactgga gctgttcctg ttgcataatg cgtaaggcc  
145321 atcataacat ttcctgatgc tatcataata aaagcataaa gaagtgggtg agcccctaaa  
145381 gcaagtcctg cactataaaa tacaaaaaac atagctgaaa tatgctgtg gtttgaagca  
145441 aagaaataat gcgtatataa aaaggcaagg cttaaagaaa tcataataga aatttcacca  
145501 agtcccatag cagaggcaaa ttcacccaaa gcttcagcca aaaactgctg tacgccgagc

145561 tttccaagca aagttgccat cattacaagg gctgaaaacc atactaaagt attccaagca  
145621 gctttttctg ctaacacctc accaaaagtc aaaactccac ttactaaaac caaagaaaga  
145681 ccgagcaaag caacacttgt agcatcaaga gaaattccaa aaagaaagcc caaagcccct  
145741 gcccataaaa gcaaaagcaa tacaaaaaca cctagcataa tcttttctact acccttcata  
145801 gcgccaagtt cttctaactt accctttgca aaaatcttag catttggggt tgatttaatc  
145861 tctgggtggag aaagaaaata aatcaccaaa ggcattaaaa gcatagccgc tatgccaggt  
145921 aaaaacatac ctaaagccca ttgtcccaa gttaaatgta cttctaatt tgtagcttga  
145981 gcgaccaaat caacaactaa tggatttgga gcagtggctg tgataaacat tgccgaagaa  
146041 ataggattgg cttggaaatt caccaaagaa agataagtgc ctattttatt ttgtgttcca  
146101 tcttcaggag tggatttaaa acttcttgcg atagcctgaa ctataggatt gattatcgcg  
146161 cccgctcttg ctgtatttga aggagttaca ggagctaaga tagtttcaca aaatgcatc  
146221 gaatacgcaa tacctaaagt tttcttacca aagatactga taaaataata cgccaaacgc  
146281 tctccaagtc ctgttttaat aactccacga gctacaatga tagaaactac tatgagccaa  
146341 attaaagaat tagaaaatcc acttaaagca tccttaatac ctgtttttga ttttaactt  
146401 gatattgcag tattaacttt ttcatctata tctttttgag acataaattc aagagctaaa  
146461 gagtttagtg ctgcatctt gctctcatca acaagctttt gtgtagcaac ttttgaagtc  
146521 gcttttgcat aaagtttgct taggctatct atttgatatt ctatgtttga attagatttt  
146581 aaaatttcat ttactttagg ttctaaattt ttagccacat ttgctttgat gagattttcc  
146641 aacacgctag cttgcgattt tttatccata gcaactttat agatattgga attatctttt  
146701 aagacaatgg cttcaagagt ttttatatgc gtagcacgaa cagaactttg agtagtcgtg  
146761 attccgctta gtgcgacaat agcaatagct atcatacaca cagctcctaa aggcatcact  
146821 tgtaagatga ccgccataat caccgcgata aaaagtccaa gaaaatgcca agaattctcc  
146881 tctaaaccta taggagtagg gattatccaa aatgcaagtg cgataaggat acacaatata  
146941 agcatgggaa ttttcttttt ctccatttat cctcctttgt tgtattaaaa ttgttaaatt  
147001 ttaattcaaa aattattaat taaatcttaa aaaaattttg ccaaagtctt gaaattctat  
147061 accaagaata aaaatattta agagatataa aaaggaagtt taaatgaaat aaaccctttc  
147121 ccagatggct gcggcacaca ctacaatcaa gtgctctgct gtgttcccac cctgaagcgg  
147181 tgcttaaaaa tagcattgca caggtctaag aaaaggcgat gaaaattata tcatactagg  
147241 cttaaaaagt cttgagttgt aaaaattaaa aatttgtata aatatgtaac aaatataagt  
147301 taaattttaa aaattaaaca ccatctttta agacataaac taagttttta taaaaattta  
147361 taaattcaat gaaagcttta atgcaaatca agcaagattt aacgcgctat ataaaaaaga  
147421 tttatcgagt tgaaaattga tacaaaaata ataagcatta gcaaaagata attcctaaga  
147481 attatctttt catattgata gctttttgta tcatttgatc acttgtagtg atgcttttag  
147541 aacttgcatc aaaagatttt tgagttgcta taagattgga taattgaaca ctcaaatcaa  
147601 cattagattg ttctaaaaat ccacccttaa attcagctgt attgatcact tgtccatctt  
147661 tcatgataaa gctagcatct ccgctattgg ctgttgacgc aaagatatta tcaccatag  
147721 cagccaatcc ttgctcattg ataaaattat acaaagcaag ttttctact atggcggctt  
147781 taccattgct aaattgcgcg actatgctac catcatctga tatgctgtat tgatcaaaaa  
147841 acccttcagc cacaccatct tgctgtgtaa ctatattttt tgcaaccctt tctttgatat  
147901 aaattccact atagcccгаа cctggtttgt ttgctgata aggagtgcct aaatctatat  
147961 tgatagtccc gccgtctgga tttgcaatac ttgtgatatt gttttgaagc aaggctccat  
148021 ttttatcaaa aaccatactt cttcagttg gattgccac cgcttcgcca tcagaattaa  
148081 aaatttgcgc gatagcttta tattgtatat tctcgccctc ttgaggcaaa attctctcaa  
148141 gcgtaagcct aagaatgctt ttactgccat ctgcattata aatggaagat tctaaaatat  
148201 ctttattggc cttttgctgt tctgttgaaa tttgtgctgt ttcaagtttt atactattag  
148261 gatctaaacc ttttaaatca agctcattac ttgtaaaatt caaattttca tccaaagtag  
148321 cttcaaaact tgtctttact ccattatcat cgataaaaatt taaaagtatt ctatcgctg  
148381 ctttagcact aaatacatct tctttgctta cactaccgct aactatatac tttccatctt  
148441 cagtcttttg gacattaat ttcgcaggat caagatcgac ttttaaccact tctgtttgtg  
148501 ctttgtatt taaacttcca ctccatttta cattttgagt tacttgcgga ggcaaataca  
148561 tattaacagg aactttaatc actccttgtg aagccgttgt ccctatatta aaaacatcat  
148621 ttgaatttac agtaaaacca ctatttacag gagttcctgt gttaaagataa tccccataa  
148681 gtcctgcaac tctatcacta taactcactc cagcaaaagc aggattcata gttcctaaaa  
148741 caaaattccc ataagaatcc actaaattgc cagcagcatc tcttctaaag gctccatttc

148801 gagtataata agcctctcca tcagctccta aaacaccaa aaaccctttt cttggaagcg  
148861 ctacatcaaa ttcgccctca cttgccacag gcgaaccttg ctcaaaaaca atctgagaag  
148921 aagccgctcc cgttccatag cccccttgag taggattggg agattgagat gtgatcgtgc  
148981 tataaaaaat atccttaaat tgagtagtag aataacttaa acccatagta ttgacatttg  
149041 cgatattggt agcagcaaca tctatatcaa aactattggg tttactcct gaaagtccgt  
149101 tataaaatga agtcatcatg gcttatgcc tctcttcgct ctactatct tctgtagttc  
149161 ctgatgagcc tccacttgaa tcacttcctg aactaccact tccgggtgcta gaagaagagc  
149221 ttaatttata atcagtaatt tctgttatag catcaaaagg aacttcttga cctgccatct  
149281 ttgcataagc taaaccttct ttaaaaatga ttccttcgat agggtagta ccataatttg  
149341 cagtattttt ttcgccattt ttattgttat aaaccatttt aacagtatac tcgccatcgc  
149401 ctgcataaac gccatcatta tttcttcctg gccattccat tgtaaaaagt ctttgagaaa  
149461 cagattgctc gccacttttt tcgctaaata ctagcttggt attgctgtca tatacttcca  
149521 aagtaactcc attttcatca gaatcttcag gcaatacat ttttagcgcg ataactctcat  
149581 ctgaaccctg aagcttgatt ttattatccg aaacagttgc catctttcct atggctccga  
149641 tagctgaagt actcatactt gtgctaaaag aatttgaaag caattgcata gtttcaacca  
149701 ttttttgcag agtgggtatt gtattttgct gcatctcaag tgctgataat tgagaagttt  
149761 gcgtaagcat tttatcacta tccataggat cagttggatc ttgatgctga agctcgatta  
149821 aaagaagttt caaaaaggca tctttatcaa gagttgcatt tggattagaa gcaagacctg  
149881 aactactagt tgaacttgta tctgaagtag tgtttgtgct agtagtagta gcggtagcgg  
149941 tattgggtatt tgtgttggtt tttgtgtttg tcatagtcca atctgatgaa gttaacatta  
150001 taaactcctt tttatattaa gtcttttttt aataaaagca ataagtgttc caatttagaa  
150061 atacttagcc aaaacaagct ctagattttac cttttcattt tcggttttcc cttctaaagc  
150121 atctttaaaa ccatatccac ttcgattttt accttgattt tgattttgct ctctttttcc  
150181 ttgatcgccta aaattcattt caagtcctgt aaatcccata tttacaagag aatttttaaa  
150241 ttcagcttga ttttgataa ataaattcat cgcattggta ttggaattaa aattgatatg  
150301 aagattattt cctctttgta ccaaagtcac ctcaacttct ccaaggttgt gaggatttag  
150361 tgtgatacta agcttggtga ttggggcttt gtattgctcc attgctgctt ttaaactcctg  
150421 cgaaaaatgt tgtaagggtt ccttaggagt gatattttta gtattgtttt gtgaaatttt  
150481 atttaaacc tttactaaag aatttaaadc atctaaagga tttttttcgg tattctcact  
150541 ctgtatttta ccttgctcct gtgtataatt tcttttatta gtgtagttag tgaattttgt  
150601 attatcttta ttggatacaa attgagtttt gtttaaat tcaaaactaa ctttttgctc  
150661 tgtgaaattt tgcttgatat cttttaaggt attgtcttta acgctcgatt tattgtcttt  
150721 attgagatta agatcctttg gatttaaat taaactcaaa ttttgagaat cccttatatt  
150781 ttctttattg gaagttttgt taaaattttgt attttcattc ttaacttggt ctttaggatt  
150841 ttcacttaga ttattatttt tatccaaggc ttgattttaa tcttttgtat ttttaattat  
150901 gtttgtttct tgattttaa cctctttggt attaaaggc ttttcttgca ctgatgcctt  
150961 attatcttgc aagattgtct tttcttggtg cgatactttc tcttggtgca ttgtcttttc  
151021 ttgtgtagat acctctctt gcattggcaa tttatcttgc gtggtattat ttttactagg  
151081 tgtcaaatct tgcgcattag ctttattttgt atttttta tctttatcat ctttttttaa  
151141 aggttcattt aaaagtgtat ttttatcatt ttttaagttc ttggtgtgct ctttgttttg  
151201 cacctcttga tttggaagtt ttttatcatt attggtttaa ttttcttgat caagttcttt  
151261 taaagactcg ctatggttta aatttttaga agtatttttt aattctgttg tttcgccatc  
151321 tgtttgaatt ttaacattat cttttttgat ttcggctttg tctttttttt catttttact  
151381 tgaaatgata gcatctaaat tttttaaagt ttgagaaagc aaagaagtat catctttgga  
151441 ttttatattt ttagaatttt gattaagatt agcgtgcgaa gtgtgattta aattttgtac  
151501 attttgattt aaatttttac tgatatgggc aagttttatt tttataatct ctttaaaaac  
151561 attatccact gcacccttaa agaaattagc cttatctaaa tttggaaaag tagccttaag  
151621 atctagcaaa cgatctactt tgatattttt tacattcaaa ccaaatctt tagctatatt  
151681 caaaagctcg ctaagattgc ttgcactttt tagggcatta aaattagctt ctgtttttac  
151741 aagttgagaa agctgggtgg aaagattggc aagtttgata tcggctgtat ctgcttttaa  
151801 cttatcaagc aaagataaaa tttgcataaa agaggcggat tcaaaaatac ttattttatc  
151861 actctcgcta aaaacccat tttgtaattt atccatagct tcattaacaa cttctttttg  
151921 actgattttc atatgatcag gcaaaaactc atttgtctct tcgatagaat tgagtaaaga  
151981 atttaaaaaa ctctctgtat catcttgtgt tgtattgtca gattttttta aatcttgcct

152041 tttagtttta ctcatgaac tatgggttgt atttgtctta cttggagtaa gatttaagat  
152101 gtcattactt ggggtcaaat ttgacatgat tgttccttaa ttatnttaaa aattgacttg  
152161 acgctaaatg aggaaatntt tctttcaaat aagcattctc atatactttg atcatcttat  
152221 cttcatttaa agcaactaaa atatccaaaa gctcttctaa attttgagca ttggtaatnt  
152281 tttcaagatt ttcttcattt tccaaaagct ctgtaagctc gcttgatatt cttgccattt  
152341 tttcattttg attagatttt aaagtnttcta aaagatctaa aacttgaagc aatacttcac  
152401 tttttctggt gattaattga gtatcaagct ctataaaaaa ctctgtattt aatggttttg  
152461 acattntaac ttcctnttta aaaatgatat ctaagcaaat tagaagcaag aagcgttcca  
152521 actnttgctt tttgaaaaat taagcaaaag ttctatataa tnttggtntt gaatntaaat  
152581 ttggagagta tcttgaaaaa tattagaaat atcgcagtta tagcccacgt tgaccatggt  
152641 aaaactacta tggtagatga actactgaaa caatcaggta cttnttagtga aagagaacaa  
152701 atttcagaac gcgttatgga tagtaacgat atagaaaaag aacgcggtat caccatactt  
152761 tcaaaaaaca cagctatcaa ttataaaggc acaaaaatca acatcataga cactccaggc  
152821 cacgccgatt ttggtggaga agtagagcgt gntnttaaaa tgatcgatgg ggtnttactc  
152881 ttagtcatg cacaagaagg cgttatgcca caaactaaat tcgtagttaa aaaagcccta  
152941 tctnttaggac ttaaacctat agttgtaatc acaaaaatcg acaaaccagc tgctgatcct  
153001 gaaagagtaa tcaacgaaat tnttcgacct tnttgtagcct tagatgcaaa cgatgagcaa  
153061 cttgactntg ctatcgtnta tgctgcagca aaaaatggtt atgctaagct tgatctaaac  
153121 gatgagagcg acaatatgga acctctnttt aaaaccatac tcgaacgcgt tccagcacca  
153181 agcggtaaca atgaaaatcc tnttacaact caagtcttca cttntaggata tgataacttc  
153241 gtaggtaaaa taggaattgc tagaattntc aacggcgttg tgaagaaaaa tcaaacgcta  
153301 atgcttgcaa aagccgatgg cactaaagta aatggtagaa tntcaaaact catcggnttt  
153361 atgggnttag aaaaaatgga tatagaagaa gcaggcagtg gcgatatcgt tgcgatcgca  
153421 ggtnttgaa cttntagatgt gggcgatagc gnttgtagatc caaacaatcc tatgccactt  
153481 gatcctntac atatcgaaga accaacntta agcatagtat tntcagtaaa tgatggtccc  
153541 ttagcaggaa ccgaaggaaa gcgatgtaact tcaaacaaaa tcgctgaacg cttagaagct  
153601 gaaatgaaaa ccaatatcgc gatgaaatac gaaagcacag gcgaaggtaa atntaaagta  
153661 agcggtaggg gcgaacttca aatcaccatt ttagctgaaa atatgcgctg tgagggctnt  
153721 gagntntgca tgggaagacc tgaagttatc gtaaaaagtt aagatggggt taagacagaa  
153781 ccattntgaa atnttagntt cgatgtgcct gaagaatnta gtggtgcagt gatagaaaag  
153841 cttgaaaaaa gaaaagctga aatgaaaact atggcaccta caggcgatgg acaacaaga  
153901 cttgaatntg aaatcctgc acgcggactt ataggctnta gatctcaatt tntaacgat  
153961 accaaaggcg aaggcgtaat gaaccatagc tntntagaat tccgccctnt cagtgggtgca  
154021 gttgaaaagc gtaacaatgg tgctntgatc tctatggaaa atggcgtggc tntggggtat  
154081 tctntgtnta acctcaaga acgcggcgtg cttntcatag aacctcaaac caaagtatat  
154141 acagggatga ttataggtga gcactctcgt ccaaacgact tagatgntaa tcttatcaaa  
154201 ggaaaaaatc ttaccaatgt aagagcaagt ggaagcgatg atgcgatcaa gctntgtaccg  
154261 cctagaaaaat taagccttga aagagctnta gagtggatag aagaagatga actnttagaa  
154321 gttacacctc aaaaatgtcg tgntcgcaaa cgctatcttg atccaactca aagaaaaaga  
154381 atggaaaaag caaaatctta atggactnta aaagctntaga aaatagaaga cttntatatac  
154441 ttaaacgctt aggaatntta aaatnttnta gcattataga agctntgctt gtaggctntt  
154501 tagcctntgt tnttacaana gatatntnta tagccatcat cctntgctgtg tnttgtaggca  
154561 tntntntctt tcgntnttaca gctaaaaaac tcaaaactgc aaaaaaagaa tntagaatntg  
154621 atgctntgaa tntatntntg cgtcgtntnt gagctaaatt tagaaaaaga agntntaagcc  
154681 aaaaagatnt tnttaaaacta gaactntagc acaatnttaa ggatntntaa agccaaaatt  
154741 gctntgaatt taaagaatnt aaaaatntatg atatccatnt catcgatgaa acaaacgct  
154801 tntntntgntg aatntntgct gaaatntnta agcctagcaa aaatcctagt tntgaagatg  
154861 aagagaaaat ttatgntnta ttacaagata aaaatntcac tctaaatcat atctnttnta  
154921 aggacaatca ctatctntac gctactntaa aaaaccctnt tntcatagac tntaaaagaaa  
154981 gtctagaaaa aaatntcaaa aatnttagaaa acaatctcaa gctaatagaa gaaaaaatca  
155041 tcaaaatnta atcctcatct ttagccaaat tctccaagct tntaagctct tctntgccta  
155101 tcaaatntcc gcctntgcaag tcgctaaata tcgcattnta agaactcact atggcagtag  
155161 aatntaagct taaatntnt atggctctnt ctctntntnt ccatatatnt tgcaaggctc  
155221 tntntntctg ttctagctct tctntcatat tntgataagt tntgagtatg aaggtgattt

155281 gagtgtaa ttcttttagaa tttaggtatt cgtataagat atgatttttc tcatctttgt  
155341 tttgcaaagc atttttgagc ttgtaagcat tgactatgct ttctctaagc accgcaaaaa  
155401 cacctttaa tttagcaaaa gtgcagatta aaatcccctc tttaaaatgc gttttttgct  
155461 tttctttagg catggttttg gtgattaaaa ccgctatatc actcttagca gctatgctgt  
155521 caagcttaag cttgtcgatc cattctttat taaactcctt agtgcgtttg ctctcataca  
155581 aaatactacc gcaaatattg ccaaagctgt cttttacgat atgcaaacia tccgccccat  
155641 ttacaccctt tggcacttct tttacctcat cgccgatgta ttcgttttgg atgtattctt  
155701 ctatgagtag ttctgctgct tctccttgga gttgctgtga gccttgctct atcctgctgt  
155761 gtgcgtcctc tagcttttgg gctacgcttt taaaatttgt ttctaattct ttgtatttta  
155821 actcctgctc ttgagtgcct ttttgaaatt caagacgcat cttatctctt tcaaattcca  
155881 aatttttact ttcttgctct ttaaattcct taaaagcttc ttctttggct tgaaatttca  
155941 gtctttcttc gttttctttt tgctctcttt ttagtctttc attttcagct tttacttta  
156001 agaattcggg gagttctttg ctcttttttt ctaattcttc ttgcatgatt ttcatctcat  
156061 tttcatgctc tttgttaaat ttctcactga attctttttg gaaattttgc ctttgatta  
156121 gcaattcttg ctccaatttt tgtttttcta aaagaagttt ttggcttact tgctcgttta  
156181 tgagtttttc ttgctctagc ttttgggctt ttaagtcgtt taaggccttg atgtactcgg  
156241 ctcttttggc atttacctca tcttcaaatt cttttttttg cttgagcatt tcttgcttgg  
156301 ctttgtctaa aatttgagca tataaagcag tgctgatatc gataaaactt ccacaacttg  
156361 ggcatattgat ttgctcgttt tgattaaaat ttggcataaa gacttccttg agaatttttc  
156421 tataaattta acatagaaaa acaaagatta ttctaagatt gacttgtaa aatccttgtt  
156481 ttaaaaataa ttaggattac aaatgcaaaa acacaccaa attcacggct tttcaaagct  
156541 caaactcatc atcatccttg ctttgatgct aagcatagca ccactttcta cagatatgta  
156601 tttgcctgcg cttagccatg tagaacaag ctttcatacc tctaaagcac tgactcaact  
156661 tagtatcgcg agcttttttc ttgcttttgc cttagggcaa ctcatatatg ggcctttaag  
156721 cgatatcttt gggcgtaaaa ttcccgcttt ggttaggaatt ttcttcttta tcgtttcaag  
156781 cttgttttgt gtgatcatcg acaatatcta tgcctttatc gctttgagat tttttgaagc  
156841 actaggaggc tgtgcaggag tagtgatcgc aagggtata gtaaagact tgtttgagat  
156901 caaagaggct gcggggatct ttgctttgat gatggatatt agctcccttg ctctatgct  
156961 ttcgccgact tttggaagct ttttgcgtgga gtatttttca tggcatagca tttttacgac  
157021 tttgtttgct ttgggaattt tgcttttttt gatgatactt tttggcttaa aagaatccgc  
157081 accgcacctt aaaaataaaa aattctcca cgaagaagcg atgaaaagct ataaaattgt  
157141 tttaaaagat aaacgctttt taacctatgt cttttgtgct gctttggctt tggctgcgat  
157201 gtttgcctat atcacgggtt cgagttttgt atttacacia ttttttggct taagcgagca  
157261 acaatttggc ataccttttg gagtaaatgc ctaggctttt gtcactgtg caaatatcaa  
157321 tgcaaggcta gtgcgtaaat ttgaaagtga aaaaatactt tcaaaagcct tgataatcat  
157381 gtttgtatca actttgatct tgcttatcaa tgcctttttg tatccgaatt tatttctttt  
157441 tgaagcaagc atttttacia gtatcgctat gcttggcttt atcgcacca ataccacgac  
157501 tttggctatg gcgagattta aagaccatag cggaaccgct tctgcggtgc ttggctttat  
157561 acaatttggc ctagcaggac tcactctctc tgtagttagt gcttttagatg ccaacacacc  
157621 gataatcctt gcttgcgtga tgtgtgcttg tgccttgata gcaaatggag tgtatttcca  
157681 agctaagcgt aaggcttagc ttggcactat ggaatttttt cgtgcggttt tttggagtga  
157741 gaaaaggact aaagccaaaa gtatagtata aatcgtaatc aaaacatttt caaaaccatt  
157801 ataactgtta tcgcctataa gatttacgat tccaaatatt attttcggct tataacatat  
157861 caccataaaa accgcgatca agttaaata cacaaaaaaa tcaaattttt ttatacacc  
157921 aaaccaatac aaacaaagca aattaaaaac accaactata cttaaacata ctccgtattg  
157981 atttaaaact ttttaacaaat tgatatcttg aatcacacgc gaagtaaaat acagtaaagc  
158041 aaacgagcct atcaacacia ccaacctctc taaattttaa agtaagtctg tatgatgatc  
158101 gcaaagcttg tgataaaagg aaagtggcca tttgtctatc ttgtccttaa gggttttatt  
158161 ttttttgttt tttagctcta gctctttaca ataaagctcg tatttatgaa aatttgaagc  
158221 gtctaagaga ttattatctt ttatcaaggt gcttttgaaa ttcctaaaag aatctctaaa  
158281 atcatttgca attttatcta aaggtttttt ttcttttagc ttattaaaat ctttgatttc  
158341 ttgtttgatt ctctcttgta aatcatcaaa agtaaaaatt aaatttgtat tgaccacatt  
158401 tatgtttcct ttaaaaatag cttgggggaa attcggagtt ttatcaaatg ttactccata  
158461 aaaacaagct gtcttttcaa attcacatgt ataaaaatta atataatccc taaaataaga

158521 actattaaaa aaagtgtttt cattaaaaac acccgaaaaa taaacagctt tataaaagtg  
158581 gcaattttcc atagttaata gcttaaattt tttttgcat gtaaaaaaaaaa cttcttcaaa  
158641 aaaattacaa tttacaaaag ctaaattttt atattctaaa tacataactt ctataaccgt  
158701 tatatgtttt ggttcgcggt aatattcttc tcctatccta cacttaaaat cgcactgttt  
158761 aaattgtaaa gaaaactttg taaataacc tatlattact tttttatag gcaatctttc  
158821 ggacaattgt ctttttatag catctttcat atcctctcca acagaataat gtgcccggtg  
158881 tctaataat attgtatcgc tttttacaaa aatatttttt tcttcaattt gcaattcttt  
158941 tgataatatt tttctagata tcattctcata tgatattttc tttacctctg ttttcaataa  
159001 gtcctcatta atatctttgc ttgcattttc ccaatctct ataatacgt tataaatatt  
159061 ttttttaagt cttttttttt cttcattctc taaaagtfff tccgataata cttcttttct  
159121 gacttgtcga attaaaggaa ttctcacatc tttattttaa gtttttttac acattaccta  
159181 tcctctataa tttctatttc tttggttttt agtgttttgc tataaatfff catcacaata  
159241 ctttaaattt ttcagcttgg cactatggaa tttttctgtg cggttttttg gaggtagaac  
159301 aacaccaata ccacaagtat aaaatacacc acagacaaac taaacaacaa aggataagta  
159361 gtattagaat ctttatctaa aaagcttcca aatataggaa gcaataagct aggttttagcc  
159421 aacaataaa aaatgcagac tgcataagaa atacttacia aaagaaatct ttcaaattca  
159481 tcatcaagaa ccaatataaa aacaaataaa catacaaatg acaatataat caataaatga  
159541 ctaaataatc acttaggtag tcctatataa aaaacaatta cctcaagtaa aagcaaaaat  
159601 aaaaaccaca aacaattagc attagacaat atcacaactg caaataataa acccaaagta  
159661 aaagtgaaac aaaatttaga tatatctaag tcctgaattt ctttctctat atttaaagat  
159721 aagagattgt aagtagtttt attgtgttct ttaaaaatat aattttcatt agaatccact  
159781 ttaacgatat tatattttat atcattttct atatgactgg gttgcttaaa tttgtcaaac  
159841 acaaaagaaa acataccaaa aagcataatg actataagta agttatgaaa tgctttgagt  
159901 aagtctgtat gatgatcgca aagcttacga taaaagaaaa gttgatattc gtctactata  
159961 tctttaaaag ttgtagcttt tttatttttt agttctagct ctttacaata aagttcacat  
160021 ttatgaaaat ttgaagcatc taaaagatta ttatctttta tcaaagcatt tttaaaagtt  
160081 ctgaaagaat ctctaaaatc atttgaaaat ttgtataaag gttttttatc ttgttctttt  
160141 ttatctttgt taaaatcttc atattcttga tcaatttgtt tttctaaatc atcaaataca  
160201 aaatttgaag ttatatttaa agcattcaaa ttacctttta aaactacttg agaaaaattc  
160261 ggagccttat aaaacttcac tccataaaaa caagctatat tatcaaattt acactcgtga  
160321 aatcagcat aattataaaa ttcagagttg ttaaaaataa cttcatcttc aaaatgagca  
160381 tttgaaaaat ttaattttac ttgattatct ttatctttat atccaaattt agaatctaca  
160441 aaataacacc tatttttaaa tttatttttt cacaaactta tattttttat ggtgcaattt  
160501 tttataaaaa gatatccttt aaattcgtta tcttgcaaat ctaaggatat gattttttta  
160561 tcattttgtt cattggagca atttataaaa accaaatgat ctaaaattg gttttgatat  
160621 atttctaagt cattataaaa cgcacactga ttaaaagtta atgttttttc aaaaataata  
160681 ttttctaatt ttattaacgc tttttcaaaa gtacaattgt aaaagtatag attggtttta  
160741 acaatgcgat tattctctga ttgcttatca cttaaagctaa tattacattc actaaaaata  
160801 atattacact gggcaatagc attataactgg atattgttca tattatcaca taatgaagat  
160861 aagtctagtg ttgccttgcg aatcaaatac catttttcat catcagaaaa taactcatct  
160921 cttgacctaa agtcttcttt tccttttatt tcttttattg tttcttttgt tttttcatca  
160981 cttgggatag atatatcata ttcttttata ttatttggat tgttttttga taaaatatta  
161041 aataactgtc ttctaatttc atactcactc ttaatttcat actcactctt atcattttga  
161101 tgtgtttctt cacaacattt ctctagggtta ttaagtattt tttcaaagtc tttctctatc  
161161 atttaatcct tcctattttt cagcttggca ctatggaatt ttttctaatt gtctttataa  
161221 aagaaaatac aacaaaacca aaaacgattg tataaattcc acctattgtg ctaagcggat  
161281 ctagcataga tcttttatct gtaaaaattc ccatagcagg gataagaatt ttcggtgaaa  
161341 ccgctaggac tgaaagagtt accccataag atatgattat aaaaaattct cttatatatt  
161401 ttagacataa agcaaatcca actaaacca aataaccaa aagcattgca aaatttactt  
161461 ttaccacaaa caaataattg tcctgtatga tagaatttat atgatgatta taaaatcca  
161521 atgaaaaata ccaatgctcc aagataggct tatatccaag acgatagtta aaactagcaa  
161581 ccatcacaac gcttgatctc acaaaaatcc ctatcaccaa aataagtgaa tttaaacttt  
161641 gtaaaatctc agtatgatga tgcgaaagct tgcgataaaa ggaaagtgtc catttgtcta  
161701 tcctgtcttt aagggtttta tcttttttat tttttagtcc tagctcttta caataaagtt

161761 catatztatg aaaatgtgaa gcgctctaaa gattgttatc ttttatcaaa gtgcttttga  
161821 aattcctaaa agaactctta aatcatttg caaatatc taaggatttt tcttgatata  
161881 aatttggtat aacacctact tctttagcta ttctttgact tttgtaagaa ccatattcct  
161941 gtttgatttt ttcttctaaa ttatcaaaag taaaatftaa atttgtatta actacattta  
162001 aatttccttt aaagatagct tgggaaaaat tctggagtttt atcaaatftt actccataaa  
162061 aacaagctat tttttcaaat tcacattcat gaaaatcagc ataattataa aattcagagt  
162121 tgttaaaata agcattatftt tcaaagttag catttgaaaa atttaattct gctttattca  
162181 ctttatcctt atatccaaat ttagaatcta caaaataaca cctatctfta aatttatftt  
162241 tccacaaact tatatfttct atgatgcaat tttgcataaa aaaatactftt ttaaactcac  
162301 ttaagtttat atccaaatat tttatftttag tttcttctt caaatftgata ctttctgaaa  
162361 aaatactatt atftaaactt agctctftaa attcgcaagc tctaaatact attggttftt  
162421 tttgttctact ctctgtatcta catccatcta tctcaaaatt tftaaacaa atatftftfta  
162481 attctatcac cttaaaatcg caattgttaa aatataaatt ttgtccaatt tftatftftt  
162541 ctttagaaaa ggaatcagtg aactfttattg tatagcctt caaatftaatt tgataatcca  
162601 tatcagccaa actagacatt tftftftaaat ctatftctaa atctaaaaga tftftftctt  
162661 tattgcttat gataaataaa ttcttatgct tfttcttatc atgagcaaaa ccgaaattgt  
162721 ttatattftac ttcattftatt acttctatftt tatctfttga acgatagcct agaatacgac  
162781 ataactctft tftaataatft tcaatftcat ctgtgataa agtftaaatt tcaaatcca  
162841 tfttatfttcc ttgtctftftt tgagctfttgt actatagaat ttaatttgac tftftftcat  
162901 ctcaaatga tftatacacg ctatacaatc gcggataatt gctctftatta gcttctftaa  
162961 tgctaaagta tatatcacia tatgaaaaa tcatctcatt attcaaaaa tctctftatft  
163021 ctcttctga tgattftatft atftfttcca aatgagcata aaaatcgcta taactftfta  
163081 tatattftata tftatcttgg atftfttftga tctftfttga aaaattatft tgftftattg  
163141 ttatftctft gatttctaa gctctatagt atgtfttcaa tgcttcatca ccattacata  
163201 ttatattaat aaatftftca tcatatftac aatctfttgc taattctaa caatatftft  
163261 tcatftfttag atftctftca tftftatcaa aatgaaatac cctatcaagt gctataaaat  
163321 ttataaaacc caactcgtat acaaaatcat ctaattgttt tcatcaaca ctatftaaaa  
163381 aaattcaag tftatftfta ttgggtgcat ttggatactg aatgctatct tctaataact  
163441 ttctcaatgc aaataaacca ctataaaacc tatatctft caattctft tcaaaatctt  
163501 cttftftatc attaggtata gaataaatca aaccattgtt agtataatct ttaattatac  
163561 tattgatagt tftftaaaa atacgcggca aagggtatacc ttgttgctft tcttcatfta  
163621 aattatatga atccatatft tcatatftcta atattatftt tfttgatatt tctataaaga  
163681 aagctftata ctctfttftt tgttccaatc tatctgcaag ctgcaattct ttattgaaaa  
163741 attcaagagc tfttattatft ttatftaaat ttcttagatt tcaattftga tatatagaat  
163801 ctggaattat ttctfttagat atftctggat tftfttctft taaaattftgc gatacaactt  
163861 ctgftfttga acgtatgtgt atatftaaat ctatacactt ttctfttatat gtatcaaaaa  
163921 tftctftatc tftftctfta ttatftgata atctatctft atftgatatc aaaataactt  
163981 tacatftftc ctctftaagc tgattaatca aacctaaat atctftaata tcaagcttat  
164041 ccgattftct ttctaaatca tcaaggcata caattatatt tftgaaattt tftgtftataa  
164101 atagttgcaa aaatgttccc acagataact tcaaaaaagt tatatftcta ataaaaata  
164161 aaatcttgtt atgtftatag gctftftaggg ttatftctt taaaacttct ttataatgtt  
164221 ctttccaaa taagaaaca taacaatat tftftacttg tftatfttga tftftaatat  
164281 aattacaaag atftaaatac tctgtaatac ttataagggt aattccgaca cattgtftfta  
164341 tgatggaaaa tagtattatft aaatggftaa gaaaatftat atttagactta aactftfttcc  
164401 acaaatfttct ctatgtatft atftfttggat taatftcatt tcaatfttct tccataaat  
164461 aagftfttcc aactcccaa gagccactta tcaataaact ataatfttcc tcatcttcca  
164521 aaaaatftft atctgttftt ttatattcca ttatftactt tcaatgattt ttatctcatc  
164581 ttcagtgaga ttgtagagtt tataaaccaa agaattgatt ttatfttcat tatctfttagc  
164641 tfttagtftt ttgctataaa tfttcatcac aataccttaa aatfttctagc ttggcactat  
164701 ggaatftftt ctaattgtct ttataaaaga aaatacaaca aaacaaaaa cgattgtata  
164761 aattccacc atftgtgctaa gcggatctag catagctctt ttatctgtaa aaaatcccat  
164821 agcagggata agaatfttct gfgaaaccac taggactaaa agagttatcg cataagatat  
164881 gattataaaa aattctctta tatatftttag acataaagca aatccaacta aaatcaata  
164941 accaaaaagc atftgcaaat ttactfttct cacaaacaa taattgtctt gtatgataga

```

165001 atttatatga tgattataaa aatccaatga aaaataccaa tgctccaaga taggcttata
165061 tccaagacga tagttaaaaa tagcaacccat cgcaacgctt gatagcaciaa aaatccctat
165121 caccaaaata agtgaattta aactttgtaa aatatcagta tgatgatcac aaagcttggtg
165181 ataaaaggaa agttgccatc gttcgatfff ttctcttaag cttttctfff ctttatactt
165241 tagctccaac tccctagcat aaagctcttg tgttcttagc tctgaagcgt cgattagatt
165301 gtgatgagct atgcgggtgc tttttaatff tctaaataaa tctcttaaat ttagcaaggc
165361 acgaaattta tcatttttat cttgtatatt atttatctta ttttctatat ctttatcact
165421 atatttgata tattgatggt ctatgttaaa ttggttagaa aaagtgcagt ttataaattg
165481 cggtttggtta ttgagctttg tattgctaaa ggttacaaca ccattaaaca aaacattatc
165541 aaatctcaat ctttcaaatt ccattccttc aaagcttaat gtatccttaa atattgcgtt
165601 ttggaataca taagattctg cataagattc tacatttata tcatcattat gaataaaaatt
165661 tttttatta aattctacat tatgaaatat acaattatff ggatttatat taaaaaagag
165721 tgcctcatct ttaaatatcg aaaacaaaaa gctaattctt gctttaagca caagactatc
165781 aaaagccacc tttcccttaa agatagtttc cctaaattca ttttctattg tttcattatt
165841 actttgctct gctagaaact gagtttctat aaaccttacc tcttctttaa actgtgaaag
165901 tccaaaacta acccttgctt taaatgtagc gttagaaaaa aatgctcttc cttcaaaaat
165961 aacttcttca aaaatattff ctattgtttc attattactt tgctctgcta gaaactgagt
166021 ttctataaac cttacctctt ctttaaactg tgaagtcca aaactaacc ttgctttaa
166081 tgtagcatga ttaaagattg tctttcctat aaaaacaact ctaaaaatt gattttcgat
166141 tatatcactg tcgttttgat ttgcttgaaa tttgggtggtt gtaaaaattg tttcattttt
166201 aaactgtgaa agtgcaaaac taactcttgc tttaaatgta gcggttagaaa aagatgctct
166261 tccttcaaaa ataacttctt caaaaatatt ttctattatt tcattattac tttgctctgc
166321 tagaaactga gtttctataa accttatctc ttctttaaac tgtgaaattc taaaaccaac
166381 ctttgcttta aatgtagcgt tagaaaaaga tgctcttctc tcaaaaataa cttccctaaa
166441 atcattttct attattttgc tattattttg ctctgcttgg aactgagttt ctataaatct
166501 tacctcttct ttaaactgtg aaagtccaaa actaacctt gctttaaata tagcatgatt
166561 aaagattgtc tttcctataa aaacaactcc taaaattgta ttttcgatta tatcactgtc
166621 gttttgattt gcttgaaatt cagtttttat aaagtttgct tcacttttaa actgtgaaag
166681 tccaaaacta acccttgctt taaatatagc atgattaaag attgtcttfc ctataaaaac
166741 aactcctaaa aattgatttt cgattatatt actgtcgttt tgatttgctt gaaatt

```

//

```

LOCUS      DMACINML_5          165586 bp    DNA      linear      16-DEC-2020
DEFINITION Campylobacter species strain strain.
ACCESSION
VERSION
KEYWORDS   .
SOURCE     Campylobacter species
  ORGANISM Campylobacter species
            Unclassified.
COMMENT    Annotated using prokka 1.13 from
            https://github.com/tseemann/prokka.
FEATURES   Location/Qualifiers
  source    1..165586
            /organism="Campylobacter species"
            /mol_type="genomic DNA"
            /strain="strain"
  gene      complement(1487..1996)
            /locus_tag="DMACINML_00905"
  CDS       complement(1487..1996)
            /locus_tag="DMACINML_00905"
            /inference="ab initio prediction:Prodigal:2.6"
            /inference="similar to AA sequence:RefSeq:CAL34420.1"
            /codon_start=1
            /transl_table=11

```



```

/product="putative integral membrane protein"
/protein_id="Prokka:DMACINML_00905"
/translation="MQFTIFHILAFVILIFCFILICILIFLKVQKEFALISYTIATI
FTALLIYSVFLTINQFTIQASLSKLTFSRDLRHESIIITGKVQNLTKFNIRKCYLMLS
ILNKKQVGGEIFDDKNVRNAKMQNTSVSYTIEIIDTLPGNTYKTFRAEAPFPPSFENP
EFYHTLTKCI"
gene complement(1996..2526)
/locus_tag="DMACINML_00906"
CDS complement(1996..2526)
/locus_tag="DMACINML_00906"
/inference="ab initio prediction:Prodigal:2.6"
/inference="similar to AA sequence:RefSeq:CAL34421.1"
/codon_start=1
/transl_table=11
/product="putative integral membrane protein"
/protein_id="Prokka:DMACINML_00906"
/translation="MERLKEIVHFYTTHTLYLVYMLILFVFFLFTCVLLLCIFLRHKP
VAALLIIALNIIICFLVYTYGYKLIDSQARSRKTIVEQKFIQSSGALIVDFNITNTS
KNDFKQCKIIAKIFKDKLPQDNLINTYKNKFIPFRQKSREIFNLKQNTTQFQRIAFDN
FNYDNNYTIRLNSECF"
gene complement(2537..3619)
/locus_tag="DMACINML_00907"
CDS complement(2537..3619)
/locus_tag="DMACINML_00907"
/inference="ab initio prediction:Prodigal:2.6"
/inference="similar to AA sequence:RefSeq:CAL34422.1"
/codon_start=1
/transl_table=11
/product="putative transmembrane protein"
/protein_id="Prokka:DMACINML_00907"
/translation="MPADLNDYFNKKNNGNSNNNNNRQNFNFKAPEFNFKGFSGKFSFV
YGAIIVLFLIIAKPFMVINSNGEMGIKSTTGKYDPNPLEPGLHFFLPFIQKITIIDTR
VRQINYASIEGSNENLSSGSGVINKNSISVLDSRGLPVSIDVTVQYRLNPLQVPQTIA
TWSLNWENKIIDPVVRDVRSVVGKYTAEELPTNRNAIATQIEEGIRKTIEAQNEPV
ELRAVQLREIILPLKVKEQIERVQIAKQEAERTKYEVERANQEALKKAALAEGEANAT
IISAKGKAMAVKIEADAQAYSNKEIANSNTPLLNKQIETQKEFNEALKVNQDAKIF
LTPGGAVPNIWVDTKDAKKQSSANMN"
gene complement(3635..4549)
/locus_tag="DMACINML_00908"
/locus_tag="DMACINML_00908"
/EC_number="2.6.1.42"
CDS complement(3635..4549)
/locus_tag="DMACINML_00908"
/EC_number="2.6.1.42"
/inference="ab initio prediction:Prodigal:2.6"
/inference="similar to AA sequence:RefSeq:CAL34423.1"
/codon_start=1
/transl_table=11
/product="branched-chain amino acid aminotransferase"
/protein_id="Prokka:DMACINML_00908"
/translation="MISADKIWMDGKLVDFKDATLHFLTHSLHYGNAVFEGTRAYKTD
KGLAIFRLEDHTKRLLLESAKITLLNCPFSQKELEKAQIELLKVNDKNNVYIRPVIFL
GDGVMGLYHVKAPVRVGIAAWEWGAYLGEEGLEKGIKVKISSFVRNSVKSCMGKAKAS
ANYLNSQIAKFEAIEAGYEEALMLDEEGFIAEGTGECFFIVKDGVLITPPNDFSLKSI

```

TQDTVLKIAHDLGLTVLRQRISRDEVYTADEAFFTGAAEITPINNV DARIIGSGIRG  
 PITKKLQDAYFDVVYGRNEKYASMLTYI"

gene 4893..5099  
 /locus\_tag="DMACINML\_00909"

CDS 4893..5099  
 /locus\_tag="DMACINML\_00909"  
 /EC\_number="5.3.2.-"  
 /inference="ab initio prediction:Prodigal:2.6"  
 /inference="similar to AA sequence:RefSeq:CAL34424.1"  
 /codon\_start=1  
 /transl\_table=11  
 /product="putative tautomerase family protein"  
 /protein\_id="Prokka:DMACINML\_00909"  
 /translation="MPIVNIKLAKPALSKEQKAELIADITELLSTKYNKSKERVVVML  
 EDIESYDIGFGGESVEAIKAKASK"

gene 5096..5554  
 /locus\_tag="DMACINML\_00910"

CDS 5096..5554  
 /locus\_tag="DMACINML\_00910"  
 /inference="ab initio prediction:Prodigal:2.6"  
 /inference="similar to AA sequence:RefSeq:CAL34425.1"  
 /codon\_start=1  
 /transl\_table=11  
 /product="bacterioferritin comigratory protein"  
 /protein\_id="Prokka:DMACINML\_00910"  
 /translation="MSILKEGDEAPQFELSNQDGVKIALKDFIGKKVILYFYPKDNT  
 P GCTTEACDFSANYDKFCDKNAVIIGVSPDGVASHDKFIAKFNLKHILLSDSEKEVAKA  
 YGAWGLKKNYGKEYEGEIRSTFVIDEAGKIAQIYSSVRVKDHALKVLESL"

gene 5554..6645  
 /locus\_tag="DMACINML\_00911"

CDS 5554..6645  
 /locus\_tag="DMACINML\_00911"  
 /inference="ab initio prediction:Prodigal:2.6"  
 /inference="similar to AA sequence:RefSeq:CAL34426.1"  
 /note="conserved hypothetical protein Cj0272"  
 /codon\_start=1  
 /transl\_table=11  
 /product="hypothetical protein"  
 /protein\_id="Prokka:DMACINML\_00911"  
 /translation="MLVHICCSVDSHYFIEELRKEYPKEKIIGYFYDPNIHPLSEYEL  
 RFLDVKRSCDKLGIKLYKGEYEEKWLKAVKGYEDEPEKGARCEICFDLRMGSSVEFA  
 AKIGEKLLTTTTLTSPPKDLEQLKNALQKECEPYGVEFLAPDFRKNNGGTQRQFALAKK  
 EMLYHQNYCGCIYGLKKQKQDKNFIDELMSPINAQILPASVEARIALYKKVNLLEKKG  
 IKFEIIRQKFLNYRLNALIKLDDKAVKSHILFYSHFKNHYTRFSLDEKILNENLKD  
 G IYKSMKDEISFIEFWRFNSYFKNKWNKFEDFLKYPLKIEEIKWRNKHFGAYDLSPVI  
 VLEKILPTRYEIVAKSEIYFDIKEVIKRM"

gene 6759..7199  
 /gene="fabZ"

CDS 6759..7199  
 /gene="fabZ"  
 /locus\_tag="DMACINML\_00912"  
 /EC\_number="4.2.1.-"  
 /inference="ab initio prediction:Prodigal:2.6"

```

/inference="similar to AA sequence:RefSeq:CAL34427.1"
/codon_start=1
/transl_table=11
/product="(3R)-hydroxymyristoyl-[acyl carrier protein]
dehydratase"
/protein_id="Prokka:DMACINML_00912"
/translation="MIDVMQIQEILPHRYPFLLVDKITEKLVGEVVRGYKNISISDHV
FMGHFPGHPIYPGVLILEGMAQTGGVLAFESMDAKVDPQSKVVYFTGIDGAKFRNPVR
PGDRLDYEMQVVKNRGNMWFIFKGQAFVDGNLVAEAEKAMIVDK"
gene 7210..8001
/gene="lpxA"
CDS /locus_tag="DMACINML_00913"
7210..8001
/gene="lpxA"
/locus_tag="DMACINML_00913"
/EC_number="2.3.1.129"
/inference="ab initio prediction:Prodigal:2.6"
/inference="similar to AA sequence:RefSeq:CAL34428.1"
/codon_start=1
/transl_table=11
/product="acyl-[acyl-carrier-protein]-UDP-N-
acetylglucosamine O-acyltransferase"
/protein_id="Prokka:DMACINML_00913"
/translation="MKKIHPSAVIEDGAILGDDVVEAYAYVSKEAKIGNGVVIKQGA
RILSDTTIGDHSRVFSYAIVGDIPQDISYKDEQKSGVIIGQNSTIREFATINSGTAKG
DGFTRIGDNAFIMAYCHIAHDCLLDNIIANNATLAGHVELGDFTVVGGGLTPIHQFV
KVGEGCMIAGASALSQDIVPFCLAEGNRASIRSLNLVGIIRRFDKDEVDRLSKAFKFL
FRQGDLEKNAQKLLLENSEINMKMCKFILETKRGIPVYRGKNNNA"
gene 7994..9217
/gene="clpX"
CDS /locus_tag="DMACINML_00914"
7994..9217
/gene="clpX"
/locus_tag="DMACINML_00914"
/inference="ab initio prediction:Prodigal:2.6"
/inference="similar to AA sequence:RefSeq:CAL34429.1"
/codon_start=1
/transl_table=11
/product="ATP-dependent Clp protease ATP-binding subunit"
/protein_id="Prokka:DMACINML_00914"
/translation="MPRKCSFCNEVESPQRRILANENDDAFICEYCVGAYSIIYGEE
KEFKEPKHEHGVDKIDITPKELKAYLDRYVIGQDRAKKVFSVGVNHYKRLFKSELQD
DDVELFKSNILLIGPTGSGKTLAQTAKFLDVPIAICDATSLTEAGYVGEDVENILT
RLLQAADGDVERAQQGIVFIDEIDKIARMSENRSITRDVSGEGVQQALLKIIIEGLVN
IPPKGGRKHPNQDFIQIDTSNILFVCGGAFDGLLETILKRKLGDKVVGFDFNEKENSKA
LLEKIEPDDLHFGLIPELIGRLHVITSLNELNEDDMVRILTEPKNAIVKQYQKLFAT
DGVNLFEDDALREIAKLALERKTGARGLRSEIEEIMVDLMFELPEYKNYDIVITKEV
VRDGAKALLIKKIS"
gene 9230..10270
/gene="mreB"
CDS /locus_tag="DMACINML_00915"
9230..10270
/gene="mreB"
/locus_tag="DMACINML_00915"

```

```

/inference="ab initio prediction:Prodigal:2.6"
/inference="similar to AA sequence:RefSeq:CAL34430.1"
/codon_start=1
/transl_table=11
/product="of E. coli rod shape-determining protein"
/protein_id="Prokka:DMACINML_00915"
/translation="MILDQLIGFFSSDMGIDLGTANTLVLVKDKGIVINEPSVVAVER
EKYGSRAKILAVGKEAKDMVGKTPGNIEAIRPMKDGVIADFDMTEKMIRYFIEKTHRR
KSFLRPRIIISVPYGLTQVERKAVRESALSAGAREVFLIEEPMAAAIGANLPIQEPKG
NLVVDIGGGTTEIGVISLGGLVISKISIRTAGDKLDTISIVNYVKEKYNLIIGERTGEEI
KIAIGSAIQPKELSMVVKGRDQVSGLLSRIELTSEDVREAMREYLKEIADALKMVL E
MMPPDLASDIVENGVVL TGGGALIRGLDKYLSEIVRLPVYIADEPLLAVAKGTGKALE
EISLLQQLTNEE"
gene 10260..11009
      /gene="mreC"
CDS 10260..11009
      /gene="mreC"
      /locus_tag="DMACINML_00916"
/inference="ab initio prediction:Prodigal:2.6"
/inference="similar to AA sequence:RefSeq:CAL34431.1"
/codon_start=1
/transl_table=11
/product="of E. coli rod shape-determining protein"
/protein_id="Prokka:DMACINML_00916"
/translation="MKNKLIFVLVLFLLVFISFYGGVLVKNILLVNDVLEKFGVK
DFIAESFSKHFNQVEQIEQLKARNQELEAAVLTTSFANQLNRILEDKNSTRYLPQVS
LVRAISYVRLNDYKRLWLDFAKVSPNKNKGLIHQGYTIGIAINKDGRAMALLQGDEQC
VFSVYVGKNKIPGLIQGEDDKLVKFIPKWAKINIGDEILTSGLDNIFFSDVPVGI VS
AIEDGDVYQSAEVKPYANINIPAYLYIVDSL"
gene complement(11004..11927)
      /locus_tag="DMACINML_00917"
CDS complement(11004..11927)
      /locus_tag="DMACINML_00917"
/inference="ab initio prediction:Prodigal:2.6"
/codon_start=1
/transl_table=11
/product="hypothetical protein"
/protein_id="Prokka:DMACINML_00917"
/translation="MLNSKDRQTQVILEKSGLSLSKFATILGKDRRTLAKFIENDTVKE
LDTKSKEKICEFFRYPFKIWDSSENEFYTLNLIENDEIRIIDEQYIGGLKYIFENEN
EGSLILHPAFPNPAYRDFIVPLVYQNSDSEEARIYRMRRGEKMRAHSFNASEWYSIKS
LLEFCFSPIGNFYTKQKIQILELMINTFKDNLNKSLYFFDSYDKKIYGLDMFYLSIN
AKENTMFFKAPLEMLLVEIKNSTLVHKIHEHYTHAKKCPAHILAQDACSIMEILLQCL
KENLNIKESCEILDKKSPYGNLFKKSLSIDL"
gene 12025..14082
      /gene="acs_1"
CDS 12025..14082
      /gene="acs_1"
      /locus_tag="DMACINML_00918"
      /EC_number="6.2.1.1"
/inference="ab initio prediction:Prodigal:2.6"
/inference="similar to AA sequence:RefSeq:CAL35637.1"

```

```

/codon_start=1
/transl_table=11
/product="acetyl-coenzyme A synthetase"
/protein_id="Prokka:DMACINML_00918"
/translation="MHTKIKILFKKYTKIIFLATKSHNQTKKLAFYFSNKNSIMQIQL
IKKGWIMGIVYEQTYRESLQNPEAFWAEAAKKVHWYNEWDRVLDDSDGHYRWFVGGCM
NTCYNALDLHVHNGRGDQLALIYDSPVTDTKKKYTYKQLRDRVAKVAGILANKGVVKG
DRVVIYMPMPEALIAMLACARLGAIHSVVFGGFAAHELATRIEDAKPRMIISASCGI
EVSSIIIEYKPILDEAIKKCTHKPTTCLIWQRPQYRANMLPWRDIDWELEEEKTRGVDP
VPVLATDPLYILYTS GTT GSPKGVIRSNGGHSVAMKWSMDNIYNAKAGDVFF TASDVG
WVVGHSYIVYAPLMNGCTTIVYEGKPVRTPNPSAFWRIIEEYKVNVLFSAPTAFAIK
KEDPKGEWIKKFNLDLSRIFVAGERCDSDTLKWIEKLTKKPVIDNWWQTETGWAIAA
NPLGLEAQVVKAGSPTKPMPGFNLKVLDEKQELGAGKKGILCLKLPLPPACLMIWE
NDERYRRGYLDQFPGYYLTGDTGYIDKDGYYVVLGRMDGIINVAGHRLSTGEMEEIIA
KHPDVAECAVIGVNDLKG EIPMGFIVLKEGIERDHRGIVEGVVALVRQEIGAVASFK
IATVVSALPKTRSGKILRKNLREIADGSTLNVPATIEDSNVLKACEKAINDLGYPKNK
GEK"
gene 14082..14957
      /gene="aepX"
CDS   /locus_tag="DMACINML_00919"
      14082..14957
      /gene="aepX"
      /locus_tag="DMACINML_00919"
      /inference="ab initio prediction:Prodigal:2.6"
      /inference="similar to AA sequence:RefSeq:ASN93130.1"
      /codon_start=1
      /transl_table=11
      /product="phosphoenolpyruvate mutase"
      /protein_id="Prokka:DMACINML_00919"
      /translation="MSAGKKFKELVKT SKPLTIVGAVNAYSALQATKIGHKALYLSGS
GVASASYGLPDLGIIALEEVCIDVRRICSRVDTPLLVADTGFGGAFNIARTIKELIR
AGAAATHIEDQVAQKRCGHRPNKELVSTEEMCDRIKAAVDAKIDPDFVIMARTDAHAI
EGQQKAIERALAYVEAGAEMVFAEAITSL EEEYEFVKNVKVPILANITEFGKTPYFTK
EELNRAGVSMVLYPLSANRAMNKA AVQVYESILKNGHQKDVLEIMQTREELYEMLDYY
SYEQKLDELFKRGAK"
gene 14954..16081
      /locus_tag="DMACINML_00920"
CDS   14954..16081
      /locus_tag="DMACINML_00920"
      /inference="ab initio prediction:Prodigal:2.6"
      /inference="similar to AA sequence:RefSeq:ADN91805.1"
      /codon_start=1
      /transl_table=11
      /product="Citrate synthase"
      /protein_id="Prokka:DMACINML_00920"
      /translation="MSISEATKKTGGLAGVIAGQSAICTCGLGNGLNYYGYSIEELAQ
NAEFEEIAYLLQFGELPNAKEL ENYKEKIIAQRALSENLSVLKAIKPEVHPMNLMQA
AVAALGALEGENEDFSDQDEKII RLLGILPSVLCYWHHYVNFVNGKEIDFDSKQTSIAGY
FLEKLEAPKEDFIKAMQC SLILYAEHEFNASTFTARICASTKSDIFSAAAAIGAL
RGPLHGGANEAMHLIESFKSVEDA IKGVNEKLENKELLMGFGHRVYGLGGDPRNALI
KVWSKHLGGDLLFKISEAIEALMKEKRPSLPPNADFYSASAYHFMGIPTEYFTPIFI
MSRVSGWCAHIKEQRANNKLIRPSSEYIGVEPRKFVKIQDR"
gene 16091..17545
      /gene="prpD"

```

CDS /locus\_tag="DMACINML\_00921"  
 16091..17545  
 /gene="prpD"  
 /locus\_tag="DMACINML\_00921"  
 /EC\_number="4.2.1.79"  
 /inference="ab initio prediction:Prodigal:2.6"  
 /inference="similar to AA sequence:UniProtKB:P77243"  
 /codon\_start=1  
 /transl\_table=11  
 /product="2-methylcitrate dehydratase"  
 /protein\_id="Prokka:DMACINML\_00921"  
 /translation="MSDMGILEAKRPEFDELLTKIAKYADEFEITSDLALETARYCLM  
 DTIGCGLLALKYPACTKLLGPSVEGAEFRPLGAKVFGTSYQLEPIRGAFNVGAMVRWL  
 DFNDTWLAAEWGHPSDNLGAIWAVADYVSRKNISEGKEPLKVKCVLKAMIKAHEIQGV  
 LALENCFNKVGMDHVLLVRIASTAVAAKLLGCNFEEIRNAISHAFIDGGALRTYRHAP  
 NTGSRKSWAAGDASSRGVDLALKAKTGEMGYPSALSAKFWGYEDVKMKGQKLTIPQEF  
 GSYVMENLVFKISFPAEFHAQTAVEAALALHDEVKDRLDQIEKIIITTTQESGHRIINK  
 VGELANPADRDHCIQYMVAVPLIFGRLNADDYEDSVASDERIDALRAKMQVEVDDRYT  
 KEYLESDKRSIANAVQVFFKDGSTKKVEVEYPIGHKRRRNEGIPLLIKFKANLATR  
 LSPKQCEKIMQICEDQKSLEQMFNEFSDLFWLG"

gene 17708..18601  
 /locus\_tag="DMACINML\_00922"

CDS 17708..18601  
 /locus\_tag="DMACINML\_00922"  
 /inference="ab initio prediction:Prodigal:2.6"  
 /inference="similar to AA sequence:RefSeq:CAL34988.1"  
 /codon\_start=1  
 /transl\_table=11  
 /product="putative integral membrane protein"  
 /protein\_id="Prokka:DMACINML\_00922"  
 /translation="MLKNLKFQAFFFAFLAAIFNAFVGFISVFLFKKGFMSSEVAFYK  
 CFVASLILFAILIYMRKLGALLVFIKQKIFTLLLLAFFGFFMLYHFESAAYTSMSVAN  
 VVFLVFGVGMIIIFICEALDAKRFFHLNELLAMVFALLGLWMIIFLAEGGTLENFTHLK  
 DLVNAILAGLGYALFLFFTRKLLKLGFLIPLCALLFIGSLYLSIPLFGANLNLNFSLE  
 SLVLLLALAFPLPTIGGFYCTTRALS LAKSNSVQLIELSEPLFAMLFGLFLAQSVSFL  
 QIVGGVFILFAIFVHEFKLKL"

gene complement(18585..19544)  
 /locus\_tag="DMACINML\_00923"

CDS complement(18585..19544)  
 /locus\_tag="DMACINML\_00923"  
 /inference="ab initio prediction:Prodigal:2.6"  
 /inference="similar to AA sequence:RefSeq:AON64954.1"  
 /codon\_start=1  
 /transl\_table=11  
 /product="TPR repeat protein, Sel1 subfamily"  
 /protein\_id="Prokka:DMACINML\_00923"  
 /translation="MKKIKILVFLIFFCQFSVLANNLPQNIKENLGINQFLDENLKEI  
 LNQP LKENFALTPKGEYFFESDLSLFQKQCLENNATACAYLGGFEAADTRLSLDL NKA  
 LLLLQKACKLGRLDSCARINNIKFKLLKKLDEKTYQSNLKYFLDQNSSSALLEHIATL  
 SKKDTKSAILAKKSCEQGHDAICAGLSYMYACQGVEKDLIKAKELSSKICEKDTKL  
 CFAQGWVLFNKNDILAQKLFYKSCQAGYADCNMAVDKNSKDQAMQLYLIKITQKNS  
 QNQCQNSSNKQSFVCHKASALSKEILKIQLKKISKLLFTILI"

sig\_peptide complement(19482..19544)  
 /locus\_tag="DMACINML\_00923"

```

/inference="ab initio prediction:SignalP:4.1"
/note="predicted cleavage at residue 21"
gene 19651..22920
      /gene="carB"
      /locus_tag="DMACINML_00924"
CDS 19651..22920
     /gene="carB"
     /locus_tag="DMACINML_00924"
     /EC_number="6.3.5.5"
     /inference="ab initio prediction:Prodigal:2.6"
     /inference="similar to AA sequence:RefSeq:CAL34432.1"
     /codon_start=1
     /transl_table=11
     /product="carbamoyl-phosphate synthase large chain"
     /protein_id="Prokka:DMACINML_00924"
     /translation="MPKRTDIKNILLIGSGPIVIGQACEFDYSGTQAAKTLKEQGYRV
VLINSPATIMTDPEFADATYIEPVTKESILSIIKKEKIDAILPTMGGQVALNVAMEV
YESGLLGDVKFLGANPEAIKKGEDRQVFKECKMKIGMDLPKSMYAYNYDEALKAVDEI
GFPLMIRASYTLGGAGSGVVYNMDEFKELANAALALSPIHEILIEESLLGWKEYEMEV
IRDKNDNCIIVCSIENLDPMGVHTGDSITVAPALTLTDKEYQVMRNASFAILREIGVD
TGGSNVQFAVNPTNGRMIVIEMNPRVSRSSALASKATGYPIAKVATLLAIGFSLDEIK
NDITGTPASFEPVIDYIVTKIPRFTFEKFPGANTTLGTAMKSVGEVMAIGRTFKESIQ
KALCSLERNLSGFDRVKFEDKNDLIFKIRNANEKRLLYVAQAFREGFDVKELYELCKI
DPWFLSQIKEIVDFEEQIDMDILHNKTLRLKAKTMGFSDKMIALLVNLKDNLELSQND
IYYARMKQKIIAEFSEVDTCCAGEFEALTPYLYSSINVSELTQSKNEARDKKEKKVMII
GGGPNRIGQGIEFDYACVHASFALKDLGVKTIMYNCNPETVSTDYDTSIDILYFEPIDF
EHLRGVIEREKPDGVIVHFGGQTPKFARKLSAFGAKIIGTSARVIDMAEDRKKFAEF
ITKLGINQPKNSTATSVEEAVLKASEIGYPVLRPSYVLGGRAMRVVNSELRLYMQ
EAVDVSDKSPVLIDQYLDNATEIDVDAISDGKDVYVAGIMEHIEEAGIHSGDSACSLP
PCNIDEKMQEQIIQKTANIALNLGVVGLLNIQFAIYNNELMYIEVNPRASRTVPFVSK
ATGIPLAKVATRVMWQGNLKEALKFYDTFDVVNFDNTILRPKLSKHISVKEAVFPFAK
LSGSDLELGPENRSTGEVMGISKDFANSYAKSQISSFNHLPENGVVVISLKEKDKKYA
KKLASEYSKLGFKLMATSGTCKEIVENGFECELVHKISEGRPNVEDKLNKEIQLVIN
TSDSHTFAGDTKKIRENIIRFKIPYFTNLRALAGAKSIKAIQSQSYLEVKSLQEYLK
A"
gene 22917..23339
      /locus_tag="DMACINML_00925"
CDS 22917..23339
     /locus_tag="DMACINML_00925"
     /inference="ab initio prediction:Prodigal:2.6"
     /inference="similar to AA sequence:RefSeq:CAL34433.1"
     /note="hypothetical protein Cj0280"
     /codon_start=1
     /transl_table=11
     /product="hypothetical protein"
     /protein_id="Prokka:DMACINML_00925"
     /translation="MIYLAQDTTGTAGFLSKNLEEINALKGRAKDQPCLITSAKFSELK
KIVRVPNQFKNLVRRAKKTTFIYPNNQAIRIVKECKHAQFLKEKGCIFYSSSANKHGQK
FDELWARSVADVVDIEFFENTPSKIIKLRKLRKIR"
gene complement(23336..24322)
      /gene="tal"
      /locus_tag="DMACINML_00926"
CDS complement(23336..24322)
     /gene="tal"

```

```

/locus_tag="DMACINML_00926"
/EC_number="2.2.1.2"
/inference="ab initio prediction:Prodigal:2.6"
/inference="similar to AA sequence:RefSeq:CAL34434.1"
/codon_start=1
/transl_table=11
/product="putative transaldolase"
/protein_id="Prokka:DMACINML_00926"
/translation="MKKFSLWCDFIENSFLDDDFLNLLSRGINGATSNPAIFKNAILN
SPIYKEKIAKLGKKAKEIYEELAVADIQKAADKLAPLYHTGNDGFISLEIDPRFYDN
TSLSLGEAKKLYSAIGKDNVMIKVPATNASYEVMYELMKNGISVNATLIFSLEQSQKC
FEALNAGLVEFRKNNIALQGKNTLRTPQAVISIFVSRFDRLNLSKAKEQNRIGILNA
NLAYNNIISKNEPNIRALFASTGVKGDDLPKDYIKELLFENSINTAPLDAINAFKTE
FEFKPLMNFIEYTQLNAIISQNEREKACDELLKDGLEQFCIAFEEILQALN"
gene complement(24324..24947)
/gene="serB"
CDS /locus_tag="DMACINML_00927"
complement(24324..24947)
/gene="serB"
/locus_tag="DMACINML_00927"
/EC_number="3.1.3.3"
/inference="ab initio prediction:Prodigal:2.6"
/inference="similar to AA sequence:RefSeq:CAL34435.1"
/codon_start=1
/transl_table=11
/product="putative phosphoserine phosphatase"
/protein_id="Prokka:DMACINML_00927"
/translation="MIKLCVDFDSTLMDGETIDILAKAYGKEKEVVDITHRAMAGEL
DFFESLQERVSFLKGMPYDLVLKIGQDLPLMNGAYELIEFLNSKNIFVWIFSGGFHEG
IDPAMKLLKVNLFANYLHHKNNTLSGLVGGEMMFNSKGLMLQRLKNFLNLQTHEVM
CVGDGANDIAMFNESGLKVAFCAKEILRSKADICIDNKDLKEIIVKI"
gene complement(24947..25468)
CDS /locus_tag="DMACINML_00928"
complement(24947..25468)
/locus_tag="DMACINML_00928"
/inference="ab initio prediction:Prodigal:2.6"
/inference="similar to AA sequence:RefSeq:ADT65674.1"
/codon_start=1
/transl_table=11
/product="chemotaxis protein"
/protein_id="Prokka:DMACINML_00928"
/translation="MSNEKLEQILQKQQTQIAGPVGDKEDDIIQLVGFVVGDEEYAI
PILNIQEIIKPIEYTRVPSVPDYVLGVFNMRGNVMPIDLAQRFNLGSSKMTPQTRYI
VLRGESNGSGVGGNAGFVIDRLTEAIKIHRNRIDPPPETLVKDKGMIYIGIKRDENIL
TILKVEALLKREF"
gene complement(25473..27770)
/gene="cheA"
CDS /locus_tag="DMACINML_00929"
complement(25473..27770)
/gene="cheA"
/locus_tag="DMACINML_00929"
/EC_number="2.7.3.-"
/inference="ab initio prediction:Prodigal:2.6"
/inference="similar to AA sequence:RefSeq:CAL34437.1"

```



```

/codon_start=1
/transl_table=11
/product="chemotaxis histidine kinase"
/protein_id="Prokka:DMACINML_00929"
/translation="MEDMQEILEDLVEAFELVEQIDHDLVELETNPEDLELLNRIFR
VAHTVKGSSSFLNFDVLTCLTHHMEDVLNKARHGELKITPDIMDVLESIDRMKTLN
SIRDNGNDTAIEMDIGPICARLTAISEGESPSSAKLNETPVETPQKEEPAPAPEPEVD
VNQLSDSEVEAEIERLLKARKAEDQARRAQKKQNAASPTNSKPAASTPKAENTEKKVP
ASGGGGGGMDQTIRVEVKRLDHLMNLIGELVLGKNRLLKIYDDVEERYEGEKFLLELN
QVVSQLSIITTDVQLAVMKTRMQPIAKVFNKFPVVRLDSRELGKHIELEITGEETEL
DKSIVVEIGDPIMHMIRNSCDHGIEDPATRAANGKPEKGIVQLKAYNEGNHIVVEITD
DGKGLDANGLKAKAIEKNLITEREQMTDKEAFALIFKPGFSTATKVTNVSGRGVGM
DVVKTNIEKLNQVIEIDSELGKGSSFKLKIPLTLAIIQSLLVGTQEEYYAIPLASVLE
TVRVPIDDIYTIIEGKNVLRRLRDEVLSLVRLSDVFGVKQVLESGDQTYVVVIGVAESKL
GIIVDTLIGQEEIVIKSMGDYLNQIQGIAGATIRGDGRVTLIIDVGAMMDMAKEIKVD
IKAQLESSAKKPEKPSDYKVLIVDDSKMDRTLQKALEPLGVSLIEATNGVEALNII
KSGDHDIDAILIDIEMPRMDGYTLAGEIRKYSKYRNLPLIAVTSRTSKTDRLRGVEVG
MTEYITKPYSPEYLENVVRKNLKLK"
gene complement(27774..28730)
/gene="cheV"
CDS /locus_tag="DMACINML_00930"
complement(27774..28730)
/gene="cheV"
/locus_tag="DMACINML_00930"
/EC_number="2.7.3.-"
/inference="ab initio prediction:Prodigal:2.6"
/inference="similar to AA sequence:RefSeq:CAL34438.1"
/codon_start=1
/transl_table=11
/product="chemotaxis protein"
/protein_id="Prokka:DMACINML_00930"
/translation="MFDENIVKTGSNEMELVDFRIFKQGHDKVYEGIYGVNVSKVREI
IKIPSLTELPGVDPDYIEGIFDLRGVVIPVVNLAKWMQITEPESTMLKPRVIITEFSNI
LIGFIVHEAKRIRRNWKDIEPATFSTGSGALDKGKITGVTRIENDEVLLILDLESV
EDLGIYSPKTDIDFSKIEKFSGSALILDDSMARKRVKEMMQMGFQVIEVKDQVEGL
NKLEELSQIYGENLSSILKIIVSDVEMPQMDGFHFAARIKEDARFKDIPVFNSSLSN
EFMNEKGVHEAGGESYLKFNASDFNEIAKVIKHKHSQEQQ"
gene complement(28723..29358)
/locus_tag="DMACINML_00931"
CDS complement(28723..29358)
/locus_tag="DMACINML_00931"
/inference="ab initio prediction:Prodigal:2.6"
/inference="similar to AA sequence:RefSeq:AAW34924.1"
/note="conserved hypothetical protein"
/codon_start=1
/transl_table=11
/product="hypothetical protein"
/protein_id="Prokka:DMACINML_00931"
/translation="MGDIFDLLIGEISATHEFAKPYIKLLEELALKMEIYLEGNHDF
NLARFFQRVKIFSLQEQPLKLNLHTSKGKNTDFKNSFITLAHGDIPLSPCLQFTLKS
LNHYLLVFLNQLNQLISSNSISNKILKNQNKKNLFYKIENFKNLAKERYKKGYNLGF
WCEGHYHQLNLDLDEKDIKYFNLASFAYERSFFVVECYQEIKFREQLRGQNV"
gene complement(29491..29976)
/gene="greA"

```

CDS /locus\_tag="DMACINML\_00932"  
 complement(29491..29976)  
 /gene="greA"  
 /locus\_tag="DMACINML\_00932"  
 /inference="ab initio prediction:Prodigal:2.6"  
 /inference="similar to AA sequence:RefSeq:CAL34440.1"  
 /codon\_start=1  
 /transl\_table=11  
 /product="transcription elongation factor"  
 /protein\_id="Prokka:DMACINML\_00932"  
 /translation="MKKEPMSQFGYDKLSAELKDLKDNQRPVAVVIEIDTARSHGDLKE  
 NAEYHAAREKQALIESRIAELSDLIARAQIIDPSSYEHDSVKFGSSVIMDLDTKES  
 KYTLVGICEGLDKGYISIASPIAKAMLGKKEGDDFKVRLPKGESEFEIISISYEPLK  
 F"

gene complement(29993..31084)  
 /locus\_tag="DMACINML\_00933"

CDS complement(29993..31084)  
 /locus\_tag="DMACINML\_00933"  
 /EC\_number="2.4.1.182"  
 /inference="ab initio prediction:Prodigal:2.6"  
 /inference="similar to AA sequence:RefSeq:AGQ95761.1"  
 /codon\_start=1  
 /transl\_table=11  
 /product="ipid-A-disaccharide synthase"  
 /protein\_id="Prokka:DMACINML\_00933"  
 /translation="MKNLLVCALEPSANLHLKEVLKAYKEEFGEFKIYGIYDENLCKE  
 FALNSKPLYSSHEFSAMGFIEILPLIFKAKRAIKELVNLTLSTMDAVLCIDSPAFNI  
 PFAKALKKANSKTKRIYYILPQVWAWKKGRIPVIENHFDVLASILPFDEQFFSKSIYV  
 GHPLLDEIKDFKNENDIKILLNKNESEKTIAFLPGSRRSEIKRLMPVFRELSRKFEGE  
 KILCVPPFNLERLEIYGDIKDFKIQSNTPQVLKKADFAFICSGTATLEAALVGTGPFVL  
 AYKAKAIDIFIARLFVKLKHIGLANIFCDFAGKEALNPEFLQEQVNVNLNLYEAYNKYD  
 YKAFFDKVHFLKEYLKFSGAKNLAKILNQ"

gene 31230..32105  
 /gene="zupT"

CDS 31230..32105  
 /gene="zupT"  
 /locus\_tag="DMACINML\_00934"  
 /inference="ab initio prediction:Prodigal:2.6"  
 /inference="similar to AA sequence:RefSeq:CAL34417.1"  
 /codon\_start=1  
 /transl\_table=11  
 /product="zinc transporter"  
 /protein\_id="Prokka:DMACINML\_00934"  
 /translation="MEFTLDQILVAMALTILAGLSTAIGSVIAFFSRNDNLRILSFGL  
 GFSAGVMIIYISFMEILPSAFVDFKYYHSGYGELLALLCFFGGIFLSAIIIDKFIPEDV  
 NPHDPKEDLSELKICPLPQKNEKAPAFHAGEPLKKINVKALKRTGIFTALAIAIHNFP  
 EGFATFISSLDNLSFGVAIAVAVAIHNIPEGMAVSLPIYHATKDKKKAFIYSALSGIA  
 EPMGAIVGAFILPIMNELTLAITFAVVAGIMVFISFDELLPAAKTYDKAHSGLYGLV  
 LGMAVMAVSLILLNP"

gene complement(32229..32801)  
 /gene="cdtC"

CDS complement(32229..32801)

```

/ gene="cdtC"
/ locus_tag="DMACINML_00935"
/ inference="ab initio prediction:Prodigal:2.6"
/ inference="similar to AA sequence:RefSeq:CAL34250.1"
/ codon_start=1
/ transl_table=11
/ product="cytolethal distending toxin C"
/ protein_id="Prokka:DMACINML_00935"
/ translation="MKKIFILFFALLSFLKAGPSLDELEDFTPMFAIRSLETGISLSP
FRKTSKRLEDQNWFLKEIVPSEELKAKDMHAKDLPFGYVQFVSPKGGDDICLAVLSEKS
FGTKSCKQLDQKKMQTIFSIIPMTNGSIQIRSLINGGNQCMSTFPDSSIAIENRFLG
GECLLDRSIVTELSKLFFFSPAIIIEASVIY"
sig_peptide complement(32733..32801)
/ gene="cdtC"
/ locus_tag="DMACINML_00935"
/ inference="ab initio prediction:SignalP:4.1"
/ note="predicted cleavage at residue 23"
gene complement(32811..33614)
/ gene="cdtB"
/ locus_tag="DMACINML_00936"
CDS complement(32811..33614)
/ gene="cdtB"
/ locus_tag="DMACINML_00936"
/ inference="ab initio prediction:Prodigal:2.6"
/ inference="similar to AA sequence:RefSeq:CAL34251.1"
/ codon_start=1
/ transl_table=11
/ product="cytolethal distending toxin B"
/ protein_id="Prokka:DMACINML_00936"
/ translation="MKKIVFLILSFNVLFAALENYNTGTWNLQGSSAATESKWNVSIR
QLITGANPMDVLAVQEAGVLPSTAMMTPRQVQPVGVGPIIHEYIWNLGSVSRPSSVYI
YYSRVDVGANRVNLAIVSRVQADEVFVLPPTVASRPIIGIRIGNDAFFNIHALASGG
NDAGAIVAAVDMFFRNRPEINWMILGDFNRESGALVTLDDPDLRARTRVVVPPSSTQT
GGRTIDYAITGNSNTAALYNPPPIVAILALAGLRTFLASDHFPVNFRRP"
sig_peptide complement(33564..33614)
/ gene="cdtB"
/ locus_tag="DMACINML_00936"
/ inference="ab initio prediction:SignalP:4.1"
/ note="predicted cleavage at residue 17"
gene complement(33639..34415)
/ gene="cdtA"
/ locus_tag="DMACINML_00937"
CDS complement(33639..34415)
/ gene="cdtA"
/ locus_tag="DMACINML_00937"
/ inference="ab initio prediction:Prodigal:2.6"
/ inference="similar to AA sequence:RefSeq:CAL34252.1"
/ codon_start=1
/ transl_table=11
/ product="cytolethal distending toxin A"
/ protein_id="Prokka:DMACINML_00937"
/ translation="MQKIKLSFMFLIVTIIIFSACSSKEQQINPLGRSYGKFSNDPLR
LGSKPTPPVKQNTPSLVEGKKFPAIPLVPPVITPNTFKGDNAVKGPLPRLKSPNEFAS
NALYENTGMVSDFVTIMNPNNGASLTIWALNPGNWIWGYSLFASRPFGDARAWQLIEFP

```

NNTVMIKNAKTFTCLNAYRNGIVHYPCDQTNFAQFWRLYPMTNGAYQIQNFATQQCIQ  
 TPVSNVMEEFNLSFYNIYLTDCLEKEKKNLDRQWYIGAPI"  
 sig\_peptide complement(34350..34415)  
 /gene="cdtA"  
 /locus\_tag="DMACINML\_00937"  
 /inference="ab initio prediction:SignalP:4.1"  
 /note="predicted cleavage at residue 22"  
 gene 34938..35714  
 /gene="surE"  
 /locus\_tag="DMACINML\_00938"  
 CDS 34938..35714  
 /gene="surE"  
 /locus\_tag="DMACINML\_00938"  
 /EC\_number="3.1.3.5"  
 /inference="ab initio prediction:Prodigal:2.6"  
 /inference="similar to AA sequence:RefSeq:CAL34444.1"  
 /codon\_start=1  
 /transl\_table=11  
 /product="multifunctional protein SurE"  
 /protein\_id="Prokka:DMACINML\_00938"  
 /translation="MKEILITNDGFESEGLKLIKMLKKEFKAKITIVAPATEKSAC  
 SHSITLTKPLRFIKVGRFYKLDGTPADCVYLALHALYKTRLPDLVISGINKGANVG  
 EDITYSGTCAGAMEAVLQGIPAIALSQFYKKSEKELDFKNALKVTKKIVQNIQFDKGF  
 LGKKEFLNINFPKSNIKGIKICKAGKRVYNFEAHSNINPRGMEYYWLAAANLDFEDE  
 KDSDIALLKKGVTITPIMLDLSAYDKMKKVKKWLKANNE"  
 gene 35707..36363  
 /locus\_tag="DMACINML\_00939"  
 CDS 35707..36363  
 /locus\_tag="DMACINML\_00939"  
 /inference="ab initio prediction:Prodigal:2.6"  
 /inference="similar to AA sequence:RefSeq:AMP64630.1"  
 /codon\_start=1  
 /transl\_table=11  
 /product="tRNA cyclic N6-threonylcarbamoyladenine(37)  
 synthase TcdA"  
 /protein\_id="Prokka:DMACINML\_00939"  
 /translation="MNDRFTRIKWLVSEENFDKISQTKVLVCGLGGVGGMCVDALYRS  
 GFQNLTLIDADKFEITNQNRQIHSNENLGEKAKVFARIYNAKGIVSKIDNEFLANFDL  
 SEFDLIVDAIDDIPAKVALANLIDFKRQIFISSTGGARKLDPTRIKTTSIFKTHGDAL  
 AKKFRYELRKSGFKGNFVDFVFSDEEAHCKDLGSFMGVTASFGLVLASLALRKVLDKKS  
 "  
 gene 36347..36805  
 /locus\_tag="DMACINML\_00940"  
 CDS 36347..36805  
 /locus\_tag="DMACINML\_00940"  
 /EC\_number="2.3.1.-"  
 /inference="ab initio prediction:Prodigal:2.6"  
 /inference="similar to AA sequence:RefSeq:CAL34446.1"  
 /codon\_start=1  
 /transl\_table=11  
 /product="putative acetyltransferase"  
 /protein\_id="Prokka:DMACINML\_00940"  
 /translation="MIRKADIKDLNACLSLFEQSVITLCAKDYTKDQIRAWIKIDRRQ  
 WEEKFKYDEIFLYEKRGEIASFISVKKEQQLLDLLFTHPDFVRQGLAQNLLDFILKTY

gene LHNEIYTFASLSAKDFFLKNGFELIRENKVIKEGQNLKNFLMKKDVVYKN"  
 complement(36917..37297)  
 /gene="panD"  
 CDS /locus\_tag="DMACINML\_00941"  
 complement(36917..37297)  
 /gene="panD"  
 /locus\_tag="DMACINML\_00941"  
 /EC\_number="4.1.1.11"  
 /inference="ab initio prediction:Prodigal:2.6"  
 /inference="similar to AA sequence:RefSeq:CAL34447.1"  
 /codon\_start=1  
 /transl\_table=11  
 /product="aspartate 1-decarboxylase precursor"  
 /protein\_id="Prokka:DMACINML\_00941"  
 /translation="MNITLLKSKIHRASVTEARLDYVGSISIDEKLLQASGILEYEKV  
 QVVNINNGARFETYTIATQEEGVVCLNGAAARLAEVGDKIIMSYADFNEEEAKTFKP  
 KVVFDENNTATKITYEKHGAIIF"  
 gene complement(37294..38142)  
 /gene="panC"  
 CDS /locus\_tag="DMACINML\_00942"  
 complement(37294..38142)  
 /gene="panC"  
 /locus\_tag="DMACINML\_00942"  
 /EC\_number="6.3.2.1"  
 /inference="ab initio prediction:Prodigal:2.6"  
 /inference="similar to AA sequence:RefSeq:CAL34448.1"  
 /codon\_start=1  
 /transl\_table=11  
 /product="pantoate--beta-alanine ligase"  
 /protein\_id="Prokka:DMACINML\_00942"  
 /translation="MEVITSVKEAKQITKNWKSHNLSIGYVPTMGFLHDGHLSLIKNA  
 KTQDKVIVSIFVNPMPQFPNEDFSSYPRDLERDIKMCQDNGVDMVFIPDAAQMYLKNF  
 STYVDMNTITDKLCGAKRPGHFRGVCTVLAKFFNINLPDIVYMGQKDAQCVVVRHMV  
 DDLNFDLKIQCPIIREDGLAKSSRNVLSEEERKASLAISQSIFLAEKLVQEGEKD  
 SSKIIQAMKDILEKEKLIKIDYIELVDFNTMENIENIADNVLGAVAAVFGKTRLIDNF  
 LVQGLK"  
 gene complement(38153..38977)  
 /gene="panB"  
 CDS /locus\_tag="DMACINML\_00943"  
 complement(38153..38977)  
 /gene="panB"  
 /locus\_tag="DMACINML\_00943"  
 /EC\_number="2.1.2.11"  
 /inference="ab initio prediction:Prodigal:2.6"  
 /inference="similar to AA sequence:RefSeq:CAL34449.1"  
 /codon\_start=1  
 /transl\_table=11  
 /product="3-methyl-2-oxobutanoate  
 hydroxymethyltransferase"  
 /protein\_id="Prokka:DMACINML\_00943"  
 /translation="MRKSMISFLEKKAKNEKITMVSAYDYHSARILDNSDIDIILVGD  
 SLAMTVLGMQDTLSVTMDEMLIFTKAVSRGAKKSFVLADMPFMSYQSSDRDAILNASR  
 FIKESHANGVKVEGGVEIASKIKLISQSGIPVVAHLGLTPQAVNMLGGYRVQGGKDLQS  
 AQKIIDDAKAVQDSGACMLVLECPVKLAQKISSILEIPTIGIGSGKYCDGQVLVYHD

gene LGLLNKDFKAKFVKHFDKIDPQVGVEKYRDEVKSGIFPSQEHSFDYLDELDDKLY"  
 complement(39332..39709)  
 /locus\_tag="DMACINML\_00944"  
 CDS complement(39332..39709)  
 /locus\_tag="DMACINML\_00944"  
 /inference="ab initio prediction:Prodigal:2.6"  
 /codon\_start=1  
 /transl\_table=11  
 /product="hypothetical protein"  
 /protein\_id="Prokka:DMACINML\_00944"  
 /translation="MKFYNVITMVIFILFFAGCSVSGMITADHNGKMYWVPADCPRYK  
 YFYNEPDKLICTDSNGIETGRILYPADEQQIANRYEQQRQDEISQRNMEQLHQNTEN  
 LKEINRHFYENFMPKRHNVIHY"  
 gene 39799..40050  
 /locus\_tag="DMACINML\_00945"  
 CDS 39799..40050  
 /locus\_tag="DMACINML\_00945"  
 /inference="ab initio prediction:Prodigal:2.6"  
 /codon\_start=1  
 /transl\_table=11  
 /product="hypothetical protein"  
 /protein\_id="Prokka:DMACINML\_00945"  
 /translation="MKDDFSNSSEEEILNFYKKVSSNIRKFKREKKGISQLELALDIGI  
 KSVAFYSNCECNRYGKHFNLHLYKISKSLIPLKDLLE"  
 gene complement(40146..41030)  
 /gene="modC"  
 CDS complement(40146..41030)  
 /gene="modC"  
 /locus\_tag="DMACINML\_00946"  
 /EC\_number="3.6.3.29"  
 /inference="ab initio prediction:Prodigal:2.6"  
 /inference="similar to AA sequence:RefSeq:EAQ73357.1"  
 /codon\_start=1  
 /transl\_table=11  
 /product="molybdenum ABC transporter, ATP-binding protein"  
 /protein\_id="Prokka:DMACINML\_00946"  
 /translation="MIKIDIKLPINTAKGKKQLELNTCLKANEITAIFGESGAGKTTL  
 LKIIAGLIKPEFGRIKVGDELWLDTQKNINLAIQKRKIGFVFQDYALFPNMSVKENIS  
 YAATSKQKAEELLSLMNLENLAKIYPKNLSGGQAQRVALARALAREPQILLLDEPLSA  
 LDFKMRSFLQDELVKILQHFKITLLVSHDLAEIYKLSHRILELSDGKIIKDARTNEF  
 FTSSNLSAKLRLSATLLEMKSDILVIFTLLLNQDIVKITLSEEEFLRSYKDIKIGDT  
 LLSIKAFNPPIIVGKLDK"  
 gene complement(41039..41707)  
 /gene="modB"  
 CDS complement(41039..41707)  
 /gene="modB"  
 /locus\_tag="DMACINML\_00947"  
 /inference="ab initio prediction:Prodigal:2.6"  
 /inference="similar to AA sequence:RefSeq:AAW34935.1"  
 /codon\_start=1  
 /transl\_table=11  
 /product="molybdenum ABC transporter, permease protein"

```

/protein_id="Prokka:DMACINML_00947"
/translation="MDNDFLQTLYLTFKLAFITTFILFFIGVFLAYLLSFVKFPFKSL
VQTFVALPLVLPSPVLGFYLLISFSQNSFLGQFLKEYFNLSLVFSFEGLVFASLIFSL
PFMVNPLQSAFSSINQNLLDASYTLGKGKIYTLFRVILPNSKVGIFSAFAMSAHTIG
EFGVMMIGGHKKGETLVASIAIYDELEVLNYTLAHQYAFTLFAISFTVLLSLYFVNK
KIAL"
gene      complement(41700..42101)
          /locus_tag="DMACINML_00948"
CDS       complement(41700..42101)
          /locus_tag="DMACINML_00948"
          /inference="ab initio prediction:Prodigal:2.6"
          /inference="similar to AA sequence:RefSeq:AAW34936.1"
          /codon_start=1
          /transl_table=11
          /product="TOBE domain protein"
          /protein_id="Prokka:DMACINML_00948"
          /translation="MNILNGKIIELLNEGEIVIVKISIKEQIFKVLMLDLHSLQDLKI
GTKIQVLFKEHELGFALPHSILSVENSFLARIKSIKKGKILYHIFDFDKGDEISSIIT
KEKALELKLEEGQEWLFCVKENDIILKAVYG"
gene      complement(42098..42847)
          /gene="modA"
          /locus_tag="DMACINML_00949"
CDS       complement(42098..42847)
          /gene="modA"
          /locus_tag="DMACINML_00949"
          /inference="ab initio prediction:Prodigal:2.6"
          /inference="similar to AA sequence:RefSeq:AAW34937.1"
          /codon_start=1
          /transl_table=11
          /product="molybdenum ABC transporter, periplasmic
molybdenum-binding protein"
          /protein_id="Prokka:DMACINML_00949"
          /translation="MKKLVLFCFIVLFLSLNLNAQNLSVFASSASKAMEEVKNEFLKS
HPNDNIDL VFGASGKYQQLKQGREFDLFFSADTKYAQAIYEDQNALDKPKVYVLGIL
ALYSLDESLLGGIEKLDKANKIHHLNLANPKVAPYVAAKEVLENLNDKLFEDKI
VLGENISVPVLHVDSNNADLGIVAYSLVSSINHPKGAVIDQKYFTPLKQSYVITKY
AKDKKLAFEFSDFISSQKAKEIFKKGFDTP"
sig_peptide complement(42788..42847)
          /gene="modA"
          /locus_tag="DMACINML_00949"
          /inference="ab initio prediction:SignalP:4.1"
          /note="predicted cleavage at residue 20"
gene      complement(42901..43587)
          /locus_tag="DMACINML_00950"
CDS       complement(42901..43587)
          /locus_tag="DMACINML_00950"
          /inference="ab initio prediction:Prodigal:2.6"
          /inference="similar to AA sequence:RefSeq:AAW34938.1"
          /codon_start=1
          /transl_table=11
          /product="biotin biosynthesis protein BioC"
          /protein_id="Prokka:DMACINML_00950"
          /translation="MNFLKAKDYQKHAKVQDLMLGLKCEILKNLEISHFKKVFEGCG
RGEFSDKLSKIITFDEYLKNDILDYDPDNLNVEIFDMNTLATQNLKSKQKFDLITSNASL

```

QWLDLKQVLPPTLANMLNEKGILLSTFGEMNLKEIKQSTGLGLKYFSTKELEQIFKPY  
 FSDIKITEEIVNLEFQNALEVFRHLKLSGVNSLGFYRLNKQFLKEFEKFKQNKLTYPH  
 IFILCKKDTK"

gene complement(43584..44195)  
 /locus\_tag="DMACINML\_00951"

CDS complement(43584..44195)  
 /locus\_tag="DMACINML\_00951"  
 /inference="ab initio prediction:Prodigal:2.6"  
 /inference="similar to AA sequence:RefSeq:AAW34939.1"  
 /note="conserved hypothetical protein"  
 /codon\_start=1  
 /transl\_table=11  
 /product="hypothetical protein"  
 /protein\_id="Prokka:DMACINML\_00951"  
 /translation="MKISNLIQNENSQELILVFGGFASHPSHFAHLKSDKNVVLVYDY  
 ENLDFKFDLNSFSKITLIAFSMGVCVASRVLKDIEFSQKIAINGTPFGIDKLGKIH  
 IFARQIKKFDLTFKSLFKERENEAKDFIFKDEKDLKTELEKLFEFALKERNESFIW  
 DKIIYSSNDEIFPQNALKNTFSKLIFLNPHFAFFHFKTWDEI"

gene complement(44192..45334)  
 /gene="bioF"

CDS complement(44192..45334)  
 /gene="bioF"  
 /locus\_tag="DMACINML\_00952"  
 /EC\_number="2.3.1.47"  
 /inference="ab initio prediction:Prodigal:2.6"  
 /inference="similar to AA sequence:RefSeq:AAW34940.1"  
 /codon\_start=1  
 /transl\_table=11  
 /product="8-amino-7-oxononanoate synthase"  
 /protein\_id="Prokka:DMACINML\_00952"  
 /translation="MSLENILETLEKNHNLKLTSLKHEGNFVFKEGKLLNLAGNDY  
 LNLSSCKSLKDEFDNIKEQDLFFSSSSSRSLSGNFTIYEELSFKSKFKEKEILHF  
 NSGYHLNISCIAALASIPNTLFLADKFIHASMIDGLKLGAKFFRFHNNMNHLENLI  
 QKHYDHYENIIILSEALFSMDGDFSDFNLI AFKEKYPKIKLYIDEAHSVGCDFDEGL  
 GLVKALNLEEKVDFIVFTFGKALASMGACMICKNLYKSFFINKARAFIYSTALPPINI  
 AWTKFIFEKMSSELKEKREKLQIIGNFFKNQLIEKNHQILGDAYIISLVLGENQKAIEL  
 AKKLETNGIFAPAIKEPTVPKNTARIRFSLHAGLSKEELKKVVELL"

gene 45401..46684  
 /locus\_tag="DMACINML\_00953"

CDS 45401..46684  
 /locus\_tag="DMACINML\_00953"  
 /inference="ab initio prediction:Prodigal:2.6"  
 /inference="similar to AA sequence:RefSeq:AMP64640.1"  
 /codon\_start=1  
 /transl\_table=11  
 /product="adenosylmethionine--8-amino-7-oxononanoate  
 aminotransferase BioA"  
 /protein\_id="Prokka:DMACINML\_00953"  
 /translation="MQNEILKKLDLEHIWHPCTQMKDHENLPLIPIKRAKGVWLYDFD  
 DKAYMDCVSSWWVNLFGHCNEKIANAIKKQVDELEHVILAGFTHEPIIKLSARLCEKV  
 GRNFKCFYADNGSSAIEVALKMSFHYHLNKGVKKSKFLSLSNSYHGETLGALSVGDV  
 ALYKDTYKPLLLLECLSTPVPQSKDYTQELEILKDILEKNASEICAFIPLVQCAGNM  
 HMYEAGFIDEAIKLCHQFGVQVIFDEIAVGFGRGTGSLFALHQCKESPDIKLSKGITG



GFMPLSVLTRDEIYNFYDTYESQKAF LSHSYTGNTLACAAANAVLDIFENENILE  
 KNQILSEFIKKEFSRLEKFDLGNFRTCGMISAFDILSTKYKRVGLFVFRKALEKGLL  
 LRPLANTIYFMPPYIITKEQISFVVDTLQIFKDF"

gene complement(46658..47230)  
 /locus\_tag="DMACINML\_00954"

CDS complement(46658..47230)  
 /locus\_tag="DMACINML\_00954"  
 /inference="ab initio prediction:Prodigal:2.6"  
 /inference="similar to AA sequence:RefSeq:APA48630.1"  
 /codon\_start=1  
 /transl\_table=11  
 /product="dethiobiotin synthase"  
 /protein\_id="Prokka:DMACINML\_00954"  
 /translation="MKIYISGIDTDVGKTYLSARICKELGFDYFKLIQAGVPKDSDEV  
 AKFSPKTKIFKEGVCLQTPASPHKARILEKLNKAFDIQIPQSDKLIIELAGGLFSPI  
 DDEKTMIDYMSEFKHPTLLVAKDYLG SINHTLLSIEALKQRGIEILALVLKSEDHFSK  
 DFISKYTQIPIVEFDDRVCENLSKILKNLL"

gene complement(47238..47552)  
 /locus\_tag="DMACINML\_00955"

CDS complement(47238..47552)  
 /locus\_tag="DMACINML\_00955"  
 /inference="ab initio prediction:Prodigal:2.6"  
 /inference="similar to AA sequence:RefSeq:CAL34460.1"  
 /codon\_start=1  
 /transl\_table=11  
 /product="putative efflux protein"  
 /protein\_id="Prokka:DMACINML\_00955"  
 /translation="MEWIFLFIAAIFEV LGVIVMKQLVLTKNKFYLLIFIICFALSFS  
 FLSLSMQNIAMTVAYS IWTGAGTAGGVIVGVLFYKESKSF LKFLIALIIACTVGLKI  
 LS"

gene complement(47554..47883)  
 /locus\_tag="DMACINML\_00956"

CDS complement(47554..47883)  
 /locus\_tag="DMACINML\_00956"  
 /inference="ab initio prediction:Prodigal:2.6"  
 /inference="similar to AA sequence:RefSeq:ABV51886.1"  
 /codon\_start=1  
 /transl\_table=11  
 /product="multidrug resistance protein, SMR family"  
 /protein\_id="Prokka:DMACINML\_00956"  
 /translation="MNTNIAWFMVIFGGLIECFWVGGLKYSTELWQYILTIIGICISF  
 ICLFKACEKLEVSIAYSV FVGIGTVGIVLNEIFLFDIEVSVAKIVLIALILLSTIGLK  
 FTSKESK"

gene 48017..48553  
 /gene="rplY"

CDS 48017..48553  
 /gene="rplY"  
 /locus\_tag="DMACINML\_00957"  
 /inference="ab initio prediction:Prodigal:2.6"  
 /inference="similar to AA sequence:RefSeq:CAL34462.1"  
 /codon\_start=1  
 /transl\_table=11  
 /product="putative 50S ribosomal protein L25 (general

```

stress protein Ctc)"
/protein_id="Prokka:DMACINML_00957"
/translation="MLEGIVRESIGRKAALKRDKGYLIANIYKGLENINAAFKVND
FIKEVRKKTTLAFDVKVGSQTLNVVVVDYQKDPVTAELKHVDLKAQKGVISKYMPV
KITGTAIGLKNKGVLIQSKRRLKVKCAENLPNFFELDVSKLDVGDALLVRDVVVPEG
VTMIDADRVAVVGVEKAR"
gene 48550..49092
      /gene="pth"
CDS   /locus_tag="DMACINML_00958"
      48550..49092
      /gene="pth"
      /locus_tag="DMACINML_00958"
      /EC_number="3.1.1.29"
      /inference="ab initio prediction:Prodigal:2.6"
      /inference="similar to AA sequence:RefSeq:CAL34463.1"
      /codon_start=1
      /transl_table=11
      /product="peptidyl-tRNA hydrolase"
      /protein_id="Prokka:DMACINML_00958"
      /translation="MILVVGLGNIGKEYENTRHNVGFMLVDLLLKEGNFTNLTNSKFK
GELFKMGSSFLKPTYMNSGLSVKAVNDFYKCERIIIVHDDIDINLGALRFKKGGS
SGGHNGLKSIDNLGSDYERVRIGVGKGENVISHVLGKFRAGEEELILSKVLEHSSKAL
LELIRNDDLSAISKYSLKA"
gene 49094..50152
      /locus_tag="DMACINML_00959"
CDS   49094..50152
      /locus_tag="DMACINML_00959"
      /inference="ab initio prediction:Prodigal:2.6"
      /inference="similar to AA sequence:RefSeq:CAL34464.1"
      /codon_start=1
      /transl_table=11
      /product="putative integral membrane protein"
      /protein_id="Prokka:DMACINML_00959"
      /translation="MWIFFRFISGIYLKNFFIIFLSLLGFYCGIDLLNFNDLPDAAN
LSLLYVIFLAFSAITYVLPVSLIFALVLSLVMIRANEFVSLYALGLSKNLVILFPFL
WALFFCFVYVGLNFTPFAYANDYKRNILKNGTMLKQSGEVFLKFNDEFVYISKVNNQ
STAQNIKIFNIKDLNLSSFIEAKSGVFEKKNWTLKEGNLTLLPKEYELGDKGLNISEF
KELDTLEGFKPKIIEGVASNSDYSILDILESELEFKTQNISIEALKINLYKLVFMPFF
APFLMLIMYYFFPVIARFFNLAFVAFVAVVTTLLTWGMLFLLSRLSENGVILSELGIV
MPIVLLIFLGGFMFYKHR"
gene 50194..51402
      /gene="lysA"
CDS   /locus_tag="DMACINML_00960"
      50194..51402
      /gene="lysA"
      /locus_tag="DMACINML_00960"
      /EC_number="4.1.1.20"
      /inference="ab initio prediction:Prodigal:2.6"
      /inference="similar to AA sequence:RefSeq:CAL34465.1"
      /codon_start=1
      /transl_table=11
      /product="diaminopimelate decarboxylase"
      /protein_id="Prokka:DMACINML_00960"
      /translation="MDYKCLKDEFQTPFYIYDFDFIKERFLRLKNAFKARKSQIFYAV

```

KANSNLSLLQMLVKLDSGFDCVSI GEVKRALKAGAKSYKII FSGVGKTQEELKLAL EY  
 DILYINLESEAEMMLLESVAKEFNLKARISIRVNPVNAKTHPYISTGLNENKFGVEI  
 DLARKMYLYAKNSPHLEPIGVHFIHGSQLLDISPIHEAATIVAKLVRELKALQIELKF  
 FDIGGGLGVRYEKEDIEPDLYDYAQGILAQHLGLDVTIGMEPGRFLVANSGEFVCSVL  
 YEKHNKTRKFVIVDGAMNDLIRPSLYEAYHEILLPYNQGEESLCDVVGICESGDFFA  
 KARFLPSTQNGDIMVIKNAGAYGFSMSSNYNTRNKVCELA FENGEVRMIRQRESFEEQ  
 IALEEQFLKG"

gene 51404..52171  
 /locus\_tag="DMACINML\_00961"

CDS 51404..52171  
 /locus\_tag="DMACINML\_00961"  
 /inference="ab initio prediction:Prodigal:2.6"  
 /inference="similar to AA sequence:RefSeq:CAL34466.1"  
 /codon\_start=1  
 /transl\_table=11  
 /product="putative HAD-superfamily hydrolase, subfamily  
 IIA"  
 /protein\_id="Prokka:DMACINML\_00961"  
 /translation="MFFLDVQGT LISDADKSLIYGAKELIDFLNIKNIPYVVITNNTK  
 KIDFLERLRQGLAIKEGAYIDPFSVLRYL RPCKVASFGAEEFIQSLEELGFEMDFE  
 NPMAVLVASYDDFKFQDFALMMEYAKEGVQFIAMHESSIYKKEGRLYPGVGSIMAMLQ  
 NAIDFKYQVVGK PSTAFYKEALRLLRNYNKNADFEDIKIISDDLKGD LVQAKELGMKT  
 LLVLSGKISDTKGFDTGMVDKIYPSVLEILKDLKCQI"

gene 52159..53241  
 /gene="pheA"

CDS 52159..53241  
 /gene="pheA"  
 /locus\_tag="DMACINML\_00962"  
 /EC\_number="4.2.1.51"  
 /inference="ab initio prediction:Prodigal:2.6"  
 /inference="similar to AA sequence:RefSeq:CAL34467.1"  
 /codon\_start=1  
 /transl\_table=11  
 /product="chorismate mutase/prephenate dehydratase"  
 /protein\_id="Prokka:DMACINML\_00962"  
 /translation="MPNLNLEDFRNKIDMVDDKILELLNERMSYVKSIG EIKQTSGGA  
 IYRPERERAIINRLKNANLGLLDQNAIEAIYQEIFA VSRNLEMPQIVAYLGP EGTYTH  
 QAARSFRGAMSRYIALATIEDVFKELNNKEAKYGVVPIENNTEGAVGVTLDCLGKYNE  
 LKIFGEIYMDIHHSFVGINENLKEIKRIYSH PQGYNQCRKFLESHEL SNIEFVPSKST  
 ANAAYLASQDKYSA AICSKIAAKLYNVPVLFDKIEDNAANRTRFLILSDIKNPKMPNC  
 KTSILAHTAHKPGGLS LLEQFKKENINLTKLESRPVKSKEFLHSFYIDFEGHIDDEN  
 VQRALKNADEVVWLGSYLSGEKNEIQ"

gene 53228..54322  
 /gene="hisC"

CDS 53228..54322  
 /gene="hisC"  
 /locus\_tag="DMACINML\_00963"  
 /EC\_number="2.6.1.9"  
 /inference="ab initio prediction:Prodigal:2.6"  
 /inference="similar to AA sequence:RefSeq:CAL34468.1"  
 /codon\_start=1  
 /transl\_table=11

```

/product="histidinol-phosphate aminotransferase"
/protein_id="Prokka:DMACINML_00963"
/translation="MKFNNFLNHLSNYEPGKDIEVIAREYGVKEVIKLASNENPFGAP
PKAVKVLQENAFKANLYPDDSMVELKGELAQKYNVKNENIIIGAGSDQVIEFAIHSKL
NPQNAFLQAGVSFAMYEIYAKQCGAKCYKTQSITHDLSEFKTLYEAHKDEIEIIFLCL
PNNPLGECLDANEVLEFIRAIDENCLVIIDAAYNEFASFQDNKYLKPCDLVQEFKNV
LYLGTFSKLYGLGGLRIGYGIANAIEISAFYKLRAPFNVSNLALKAAVAALHDEEFTK
KTLENNFSQMELYKEFAKKHRIKFIESYTNFITYFFEEKNSTDLSEKLLKKGIIIRNL
KSYGLNAMRITIGTPYENERFFTEFEEILK"
gene 54409..56091
      /gene="fliF"
CDS   /locus_tag="DMACINML_00964"
      54409..56091
      /gene="fliF"
      /locus_tag="DMACINML_00964"
      /inference="ab initio prediction:Prodigal:2.6"
      /inference="similar to AA sequence:RefSeq:CAL34469.1"
      /codon_start=1
      /transl_table=11
      /product="flagellar M-ring protein"
      /protein_id="Prokka:DMACINML_00964"
      /translation="MDFKNMLHQIGQLYQNLTRKQRIVIAASIVVVVGLVFLALFRG
SGSSANNGYAVLVDNVPSSSAIIVAKLEQNSVPYILESESKILVPQDQVYRQRMFIA
SEGLIKDSRVGF EAFDTQTFGATNEEQRVKYQRAIEGELARTIETLEPIRSAVVHIAF
PKDSVFTERQIPPTASVVVNVREGLKLRKQIDGIKNIVSAAIPKLTKENVRISDQSG
VPLDEQEAYEDDLVRAQIKYKSDQERALEDKIIETLAPYAGGTDKVRVSVNIDFDFSK
QESQSEIYDPNPIVRSEQTLNEERTGRKEPEIQGVPGAVSNIGPVEGLDNKGQIDTYK
KNQVTTNNELSKITITNTKKQFATVVRTSAAVTIDGKYQDVVDENGDKSEYVPLSKEE
LASVESIVKNTINFSANRGDSVVVQNL PFHRESIRVESKVKTFYNRFI EPFIPPVKYF
IAAILLFIFYKKIIAPFAQKML EDVAAQEEVQQGPSAVLDDAEDALEKFNAARKKVEE
QLGFGENFNEDSIQYEVLLLEKLRGLVSDKSEEIAALLQNLIQNDFEGEKDM"
gene 56091..57119
      /gene="fliG"
CDS   /locus_tag="DMACINML_00965"
      56091..57119
      /gene="fliG"
      /locus_tag="DMACINML_00965"
      /inference="ab initio prediction:Prodigal:2.6"
      /inference="similar to AA sequence:RefSeq:CAL34470.1"
      /codon_start=1
      /transl_table=11
      /product="flagellar motor switch protein"
      /protein_id="Prokka:DMACINML_00965"
      /translation="MIKLSEEQKMVYDDLSPMEKVAIFLIQLGEDATTSVFSHMEIDV
ITEISRYIAMAKNVDRAVATAVLEEFYTL LQSNQYIKSGGLEYAKEILFRTFGPEIAN
KILEKLTSMENNQNFA YLAQIKPQQLADFITKEHPQTIALILAHMDSIHAAETLEYF
SDELRAE VVIRMANLGDISP SIIKRVS AVLESKLESLTSYKVEVGGPRAVAEVLNRLG
QKASKSTITYIEQSDERLAETIKELMFTFDDIQKLSTQAI REILKVADKRDLMIGLKG
ASEELKQKFLANMSTRASEAFLEEMGFLGAVRVKDVEDAQRKVVEVVQKLAEQGLVQT
GDADEMIE"
gene 57127..57960
      /gene="fliH"
CDS   /locus_tag="DMACINML_00966"
      57127..57960

```

```

/gene="fliH"
/locus_tag="DMACINML_00966"
/inference="ab initio prediction:Prodigal:2.6"
/inference="similar to AA sequence:RefSeq:CAL34471.1"
/codon_start=1
/transl_table=11
/product="putative flagellar assembly protein"
/protein_id="Prokka:DMACINML_00966"
/translation="MVNRSNVISGGTSDQHVVVEGYRFKVISEFDNHTEEKQHPQISNE
DNSAALPSKDENPINESQTPAPSQVVQEVQTPAFQPSFVEDLLKKTDEMSSNIIKLQM
QIESQENEFNRLNSELESAKEKFSKEGYEQAKAEFEKELNDLRDKYLKSVSKLEEAC
VNLNTFIEKNEKELADTAIDIAKEVILKELENNSSKIAYALAKDLINELKGAGSIEIK
VNSVDYNYLKEHFSENSHIKITLDDAISKGSVIIILSDSGNIESNLNARLIKIKKMVNN
E"
gene 57953..59812
/gene="dxs"
/locus_tag="DMACINML_00967"
CDS 57953..59812
/gene="dxs"
/locus_tag="DMACINML_00967"
/EC_number="2.2.1.7"
/inference="ab initio prediction:Prodigal:2.6"
/inference="similar to AA sequence:RefSeq:CAL34472.1"
/codon_start=1
/transl_table=11
/product="L-deoxy-D-xylulose-5-phosphate synthase"
/protein_id="Prokka:DMACINML_00967"
/translation="MNEIIKKDYQFAYTKEQLEKLNLTQLEDLAARIREKIIDVVSKN
GGHLSSNLGAVELTIAMHTVFDNRVDPLIFDVSHQSYTHKLLSGKENVFESLRQFGGL
SGYTKPNDGDYFVAGHSSTSISLAVGACKAIALKGEKRTPVALIGDGALSAGMAYEAL
NELGDSKFPCVILNDNEMSISKPIGAISKYLSQAMATQFYQNFKKRVAKMLDALPDS
ATYMAKRFEESFKLITPGLLFEELGLEIYIGPIDGHNLSEVISALKQAKAMQKPCIHA
QTLKGGYSLAEGKNAKWHGVSAFDVDSGESIKKPKDAKNSATEIFSKVLFDLATKYKN
IVGITAAMPSTGLEKLEIEQYPDRFWDVIGIAEQHAVTSMAAMAKEGFKPFIAIYSTFL
QRAYDQVIHDCAIMNLNVVFMDRAGIVGEDGETHQGVFDVSLAPLPLNLTLVAPRDE
LMMKNIMEYAYIHEGCLAFRYPRGSFILDEEFNPSKIELGKAQWLKVNQSNIAFLGYG
QGVGKAWKVLRLQDEGQANLIDLIFAKPLDELLKELAKQSQIWFVFSENARIGGV
ASLLESFVQKNDLKIKIVSFEYEDNFIHGKTNEVEKALKLDIDSLVQRVKTN"
gene 59966..60376
/gene="perR_1"
/locus_tag="DMACINML_00968"
CDS 59966..60376
/gene="perR_1"
/locus_tag="DMACINML_00968"
/inference="ab initio prediction:Prodigal:2.6"
/inference="similar to AA sequence:RefSeq:CAL34473.1"
/codon_start=1
/transl_table=11
/product="peroxide stress regulator"
/protein_id="Prokka:DMACINML_00968"
/translation="MELLQILKKHELKATPQRLCVLKILKRHEHPNIEELYEEIKKEY
PSISLATVYKNLNTLQEQGLVEINVANQKTCYDIYEERHIHIICSKCGNIEDMSFQN
AELDEYQEKLEKMGNIIDHLAVCAHVSTCKKCH"
gene 60422..61624

```

CDS /locus\_tag="DMACINML\_00969"  
 60422..61624  
 /locus\_tag="DMACINML\_00969"  
 /inference="ab initio prediction:Prodigal:2.6"  
 /inference="similar to AA sequence:RefSeq:CAL34474.1"  
 /note="hypothetical protein Cj0323"  
 /codon\_start=1  
 /transl\_table=11  
 /product="hypothetical protein"  
 /protein\_id="Prokka:DMACINML\_00969"  
 /translation="MVHEIQKIFLLPDATLLENLQKDGIVFEIYEIETFYTKITHFYD  
 VKFQNLNGNFYKITRLNNPILEQNQEKISKDYEKARKKLIIEKSIKKRYEFKLCSE  
 KSFIDVYEDLNLYVLKVFFPTLEMANLFAPPKEFKIQRELCGVLDKNIILYGFNNLE  
 IDMEKCFKIIIEKNQFTLDFPSSILAFDGYRIFLFYLFKRLKLYWNLTLNRQRENFC  
 EFFSYARKIYIILMSTEEIFDEELNKNLALRFEDLVKQSHCILANNELGENLLFLSS  
 EELQNLSDFFIKEDSFYKGEQEKYFFKQMIQIQLRKRLVLFKKNLLKNFEIEIFE  
 ENFLELSVFLEYFHNLYNLKILSKLYNKYFICDFEKKMLLKLTKKKEKLGKLIHKASK  
 KLKIYKGY"

gene 61624..62331  
 /gene="ubiE"

CDS 61624..62331  
 /gene="ubiE"  
 /locus\_tag="DMACINML\_00970"  
 /EC\_number="2.1.1.-"  
 /inference="ab initio prediction:Prodigal:2.6"  
 /inference="similar to AA sequence:RefSeq:CAL34475.1"  
 /codon\_start=1  
 /transl\_table=11  
 /product="ubiquinone/menaquinone biosynthesis  
 methyltransferase"  
 /protein\_id="Prokka:DMACINML\_00970"  
 /translation="MQKQDKIIMKFNEIAPTYDKANRILSFGVDVSWRKFAKRVLKL  
 YQKDNLNIVDVACGTGDMIEIWQESAKKLNKNIAHIKIDPSEGMLNIAKQKFPNIEF  
 IEAGAQELPLQSESDIVSISYGIRNVVEREKALREFSRVLKQDGIFVVFLEFTKREKQ  
 GFVASCDFYLNILPSLGGMISKNKSAYEYLPNSIEGFLSKEEFIAELKQVGFEMLE  
 FKSFSFGVSSMFIKKV"

gene complement(62328..63821)  
 /locus\_tag="DMACINML\_00971"

CDS complement(62328..63821)  
 /locus\_tag="DMACINML\_00971"  
 /inference="ab initio prediction:Prodigal:2.6"  
 /inference="similar to AA sequence:RefSeq:ABS43406.1"  
 /codon\_start=1  
 /transl\_table=11  
 /product="tricarboxylic transport"  
 /protein\_id="Prokka:DMACINML\_00971"  
 /translation="MDTWMYLMQGFSAIDPYNILIALIGCFIGTIVGMLPGLGPING  
 VAILLPLAFAMNLPASAIILLATVYMGCEYGGRISSILLGIPGDAAIMTTLDGHP  
 AKKGQAGKALSISALSSFIGSFIAICGIIIFAPLIAQWSLKFPAEYFALIVFGLATL  
 GSMLAQKPIRSFALSALIGLFLTTIGIDGNTGVYRFTFDSPLYDGISFVVLVMGLFSV  
 SEIFLMEHTQTSQNIINKTGKILVNIKEFFFCFWTIIRSSIIIGFVGVLPGAGATIA  
 SAITYMSEKKIAGEKGFQGDLDKGVAAPEAANNASACGSFIPMLTLGLPGSGTTAVM  
 MGALTLYNITPGPTMFTDQVNIVWGLIASLLFANVILLMNLPLVGIKILSIPMWS"

LAPIIAIVSIIIGVYSINSTDFDIIILILIIGILGYFLRKLEFPMAPLILGFVLGEQLET  
 NLRRALSISNGDFSILWSGIIAQSLIGAVLIILIPLLIKKIRKSKF"

gene complement(63835..64278)  
 /locus\_tag="DMACINML\_00972"

CDS complement(63835..64278)  
 /locus\_tag="DMACINML\_00972"  
 /inference="ab initio prediction:Prodigal:2.6"  
 /inference="similar to AA sequence:RefSeq:ABS43127.1"  
 /codon\_start=1  
 /transl\_table=11  
 /product="TctB protein"  
 /protein\_id="Prokka:DMACINML\_00972"  
 /translation="MSSIRIVAGILLVISLIGIYIGWNIHSDFNYPELGPFPFVGT  
 ILIALCSIFLVFFSEDTKVKWGFILWKKLIVLTLAFLIYALFFEFGLGFIICTIFLI  
 TITLLFGATLIKAIVFSISSIIILYYLFNTLLQITLPGFIFDNF"

gene complement(64283..65248)  
 /locus\_tag="DMACINML\_00973"

CDS complement(64283..65248)  
 /locus\_tag="DMACINML\_00973"  
 /inference="ab initio prediction:Prodigal:2.6"  
 /inference="similar to AA sequence:RefSeq:ABS43865.1"  
 /codon\_start=1  
 /transl\_table=11  
 /product="TctC protein"  
 /protein\_id="Prokka:DMACINML\_00973"  
 /translation="MKLKIFCSVLIFGFSLTFAKEPNRPECIAPAQPGGGFDLTCKLI  
 QVGMLKANIISTPMRVTYMPGGVGVVAYNTMVNNRSKDGNNVAVFSSGTLNLIATGKH  
 GKYNNVVKWLASAGVDYGMIAVKSDSPYKNLEDLINALHKDPNSISIGAGGSIGGQD  
 WMQTALLAKTINVDVKKIRYVAFEGGGDALTSLLGNHIDVISAGIAELVPQIETGTIR  
 VLAIFSPKRLPGTLANIPTAKELGYEVEWPVIRAYYMGAKVSDEAYNWWLDAFDKFKQ  
 TQEYKDQLKQKRSLEFDKKGKELEDFVKKQTDQYRILAKEFDLIK"

sig\_peptide complement(65189..65248)  
 /locus\_tag="DMACINML\_00973"  
 /inference="ab initio prediction:SignalP:4.1"  
 /note="predicted cleavage at residue 20"

gene 65421..66584  
 /gene="xseA"  
 /locus\_tag="DMACINML\_00974"

CDS 65421..66584  
 /gene="xseA"  
 /locus\_tag="DMACINML\_00974"  
 /EC\_number="3.1.11.6"  
 /inference="ab initio prediction:Prodigal:2.6"  
 /inference="similar to AA sequence:RefSeq:CAL34476.1"  
 /codon\_start=1  
 /transl\_table=11  
 /product="exodeoxyribonuclease VII large subunit"  
 /protein\_id="Prokka:DMACINML\_00974"  
 /translation="MKVSELNLKAKALLETHFNDIVLSGELSKITMHGSGHWYFDLKD  
 EKSSIIACAMFKGANLKVDFQPKVGDFLELVGSVSLYAESGRYQFIANSMMKAGMGDL  
 AQFLALKERLQKEGLFNSEHKKTLQPFPKIGIITSKTSAAALQDMLKLIQKEYFLAK  
 IYVFNALTQSSAAYSILQALKKADEVGLDVIIIARGGGSREDLFCFNDEGLAREIFK  
 AKTPIISAIGHEIDYVISDFVADFRAPTPSAAIDTLLYSRLDLEQGLDLLEKLTKLW  
 ESKLEYCENLLSNLHKFFKAKSLETMIETKEKQLAFLLLKQAKIVMESKIQAELQLK

gene LQNAFFQHENFFKKSKNLISIKKNGKIANLEELKSEDIITLSSQTLQKEAKIL"  
 66594..67670  
 /gene="serC"  
 /locus\_tag="DMACINML\_00975"  
 CDS 66594..67670  
 /gene="serC"  
 /locus\_tag="DMACINML\_00975"  
 /EC\_number="2.6.1.52"  
 /inference="ab initio prediction:Prodigal:2.6"  
 /inference="similar to AA sequence:RefSeq:CAL34477.1"  
 /codon\_start=1  
 /transl\_table=11  
 /product="phosphoserine aminotransferase"  
 /protein\_id="Prokka:DMACINML\_00975"  
 /translation="MRKINFSAGPSTLPLELLEYAKNELCDYQGGYSIMEISHRSKV  
 FEEVHFGAMQKAKELYGLNDDYEVLFLQGGASLQFAMIPMNL SLGGVCEYANTGVWTQ  
 KAIKEAQILGVNVKVASSEESKFDHIPQVEFSDSADYAYICSNNTIYGTQFKNYPKT  
 KAPLIVDASSDFFSRKVDFSNIALFYGGVQKNAGISGISCLFIRKDKMLKRSQNKNLPS  
 MLKYSIHSQNQSLFNTPTFAIYMFNLEMKWLLDQGGDAIDAKNSQKAAMLYECIDS  
 SEGFYKGHADKKDRSLMNVSNITKNSELEPIFVKEAEEAGMLGLKGHRILGGIRASI  
 YNAVSLDQVKTLCEFMKEFAKKYN"  
 gene complement(67801..68778)  
 /gene="fabH"  
 /locus\_tag="DMACINML\_00976"  
 CDS complement(67801..68778)  
 /gene="fabH"  
 /locus\_tag="DMACINML\_00976"  
 /inference="ab initio prediction:Prodigal:2.6"  
 /inference="similar to AA sequence:RefSeq:CAL34479.1"  
 /codon\_start=1  
 /transl\_table=11  
 /product="3-oxoacyl-[acyl-carrier-protein] synthase"  
 /protein\_id="Prokka:DMACINML\_00976"  
 /translation="MPKASLKSIA SYVPEQILSNYDLEKIIDTTDEWITRRTGIKERR  
 IASKDENTS DLGTKAAIKAIERANLKPQDIDAILVATLSPDYFTMPSTACKIAANLGL  
 NGITAFDISAACSGFIYLLLEQAKALVESGLKKNVLIIGA EKASSIMDYTD RSICILFG  
 DGAGAGVSLDENNPIIDVHTASNGNYGDL LMTERSQESKDASSLAMKMGNEVFKIA  
 VQTLSDNVVEILSKNQILPEQIDLFIPHQANLRIIKAVQERLNL SDEKCIIVTVHKYGN  
 TSAASIPMAMNDAYEEGR LKKGNLILLD AFGGGFTWGSALLKFGGENFS"  
 gene complement(68771..69757)  
 /gene="plsX"  
 /locus\_tag="DMACINML\_00977"  
 CDS complement(68771..69757)  
 /gene="plsX"  
 /locus\_tag="DMACINML\_00977"  
 /inference="ab initio prediction:Prodigal:2.6"  
 /inference="similar to AA sequence:RefSeq:CAL34480.1"  
 /codon\_start=1  
 /transl\_table=11  
 /product="putative fatty acid/phospholipid synthesis  
 protein"  
 /protein\_id="Prokka:DMACINML\_00977"  
 /translation="MISIAIDAMGGDFGEKPIIEGVIEALKEKPFNAILVGDPHILEP  
 LIPKNLKQYIQYENANEVFSMNENATDALKRKETTIIYKTIELVRNGKAKAAVSAGHSG



ASMSLATLRLGRLKGILRPAIATLMPNTVSKTLFLDVGANTDCKAENLFQFAIMGDAY  
AKEIMKISKPRALLSNGEEECKGNELTKEAHLKQIPSFIGNAEGRDIFNGEVDIL  
VCDGFDGNVILKACEGVATAIIQILKNEIKQSLVSKIGALLMKPSFKRLKKHIDWQEY  
GGAPLLGINGCVIISHGKSDARAIKNAIFQAINFSESINQIIEKELEKYNA"

gene complement(69763..69909)  
/gene="rpmF"  
/locus\_tag="DMACINML\_00978"

CDS complement(69763..69909)  
/gene="rpmF"  
/locus\_tag="DMACINML\_00978"  
/inference="ab initio prediction:Prodigal:2.6"  
/inference="similar to AA sequence:RefSeq:CAL34481.1"  
/codon\_start=1  
/transl\_table=11  
/product="50S ribosomal protein L32"  
/protein\_id="Prokka:DMACINML\_00978"  
/translation="MAVPKRRVSKTRAAKRRTHYKVSLPMPIDKDKGSYKMPHRANPN  
TKEY"

gene complement(69933..70292)  
/locus\_tag="DMACINML\_00979"

CDS complement(69933..70292)  
/locus\_tag="DMACINML\_00979"  
/inference="ab initio prediction:Prodigal:2.6"  
/inference="similar to AA sequence:RefSeq:CAL34482.1"  
/note="hypothetical protein Cj0331c"  
/codon\_start=1  
/transl\_table=11  
/product="hypothetical protein"  
/protein\_id="Prokka:DMACINML\_00979"  
/translation="MKIAFSRINNTNYPFKLNLENVVFEGNLVKVNPVKLVKINTTMQG  
FVYRPCDSCGEELELEIKEDLDL FASDGIFKDNTNELSNTIEFFDGHIDLIEVAVSEL  
EAYLSDYFYCNNCKNKS"

gene complement(70292..70705)  
/gene="ndk"  
/locus\_tag="DMACINML\_00980"

CDS complement(70292..70705)  
/gene="ndk"  
/locus\_tag="DMACINML\_00980"  
/EC\_number="2.7.4.6"  
/inference="ab initio prediction:Prodigal:2.6"  
/inference="similar to AA sequence:RefSeq:CAL34483.1"  
/codon\_start=1  
/transl\_table=11  
/product="nucleoside diphosphate kinase"  
/protein\_id="Prokka:DMACINML\_00980"  
/translation="MEKTLIIKPDVAVKKGVIGKILDRFESNGLRIAAMKKVQLSKEQ  
AEAFYAVHKERPFFKDLVEFMISGPVVVSVLEGEAVLKNRDLMGATNPKEAQPGTIR  
ADFAESIDANAVHGSDSLENAKIEIEFFFKSNEIC"

gene complement(70808..71092)  
/gene="fdxA\_1"  
/locus\_tag="DMACINML\_00981"

CDS complement(70808..71092)  
/gene="fdxA\_1"  
/locus\_tag="DMACINML\_00981"

```

/inference="ab initio prediction:Prodigal:2.6"
/inference="similar to AA sequence:RefSeq:CAL34484.1"
/codon_start=1
/transl_table=11
/product="ferredoxin"
/protein_id="Prokka:DMACINML_00981"
/translation="MAVKITDSCIACGSCIDECPVSAIVDDANNPEGEDRYVYANKC
VECUGHNDQPACASACPTDGCIVWSEIASGQPSRDNIGSDMRDGTIPVFA"
gene 71347..71943
      /gene="ahpC"
      /locus_tag="DMACINML_00982"
CDS 71347..71943
     /gene="ahpC"
     /locus_tag="DMACINML_00982"
     /EC_number="3.4.-.-"
     /inference="ab initio prediction:Prodigal:2.6"
     /inference="similar to AA sequence:RefSeq:CAL34485.1"
     /codon_start=1
     /transl_table=11
     /product="alkyl hydroperoxide reductase"
     /protein_id="Prokka:DMACINML_00982"
     /translation="MIVTKKALDFTAPAVLGNNEIVEDFNLYKNIGPKGAVVFFYPKD
FTFVCPSEIIAFDKRYQEFKNRGIIEVIGISGDNEFSHFAWKNTPVNQGGIGQVKFPLV
ADLTKQIARNFDVLYAEVALRGSFLLDADGTVRHAVVNDLPLGRNIDEMIRMVDTML
FTNEHGEVCPAGWNKGDAGMKADPKGVAEYLDKNEDKL"
gene 72067..73155
      /gene="flhB"
      /locus_tag="DMACINML_00983"
CDS 72067..73155
     /gene="flhB"
     /locus_tag="DMACINML_00983"
     /inference="ab initio prediction:Prodigal:2.6"
     /inference="similar to AA sequence:RefSeq:EAQ73215.1"
     /codon_start=1
     /transl_table=11
     /product="flagellar biosynthetic protein FlhB"
     /protein_id="Prokka:DMACINML_00983"
     /translation="MAGEDQEKTEEPTSKKIEDARKEGNVPKSQDAAAIIVTLIVGFVI
TLFMMGFIGERITNLYRYYQSFIVGEFDLRIIQAIMIKSIFEVLILLAPIVLSIMIAG
ILGNVMQFGFIFTTKPIMPNLGKINPLKGLKNLFLSKKLVESVKIVLKVGVVFTIAFI
VLLKFMQELPLVERYNIIGQLIWLDRRAIILAAIVIIAFLVIAVLDFLVRFYFKGL
RMSKQEIKDQYKMEGDPQVKGRIRRLQMEAARRRMVQDVAGADVITNPTHYAVAIR
YDTTKEQAPRVVAKGVDFLALRIKQVAYDNNVVVYENPLPLARELYKACDINDLIPREM
FKAVAEVLGFVYNTNKSRLAGQVKKNS"
gene complement(73170..73901)
      /gene="motB"
      /locus_tag="DMACINML_00984"
CDS complement(73170..73901)
     /gene="motB"
     /locus_tag="DMACINML_00984"
     /inference="ab initio prediction:Prodigal:2.6"
     /inference="similar to AA sequence:RefSeq:CAL34487.1"
     /codon_start=1
     /transl_table=11

```

```

/product="putative flagellar motor protein"
/protein_id="Prokka:DMACINML_00984"
/translation="MAKKHKCEPCPAGEKWAVPYADFLSLLLALFIALWAIKTNPAK
VEALKTEFVKIFDYATQTVQQETQDTYKYKGSQEEKEDELSKQMTANQQEVIKLL
QAALDQSENQEILNLPKVEFERGSAQIVSVDIQDYLKRIAQLISYLPQIEIEIRGY
TDNSDSALRSYDLGYARAENVLKYLIEGGVSTKNINLKS YGLNPNPQALENNRV
QIYFKVDIKDNDAKRSVLDLIEKSK"
gene complement(73904..74680)
/locus_tag="DMACINML_00985"
CDS complement(73904..74680)
/locus_tag="DMACINML_00985"
/inference="ab initio prediction:Prodigal:2.6"
/inference="similar to AA sequence:RefSeq:CAL34488.1"
/codon_start=1
/transl_table=11
/product="putative flagellar motor proton channel"
/protein_id="Prokka:DMACINML_00985"
/translation="MDLSTILGMVLAVTSISVGDILEGPNLHVHLSFLIVMPTAA
FCAMTSTHKKIVKAAYKELKIVFKGSGVNLPERIAQLIEFAIARRDGLLALESRTNE
IENDFLRNAMMMLVDGKSFEEIHESMEIQTEQLEEHYKECAEYWIIFGETCPTMGLVG
AVFGLILALKLLDNPQAMAAGISGAFTATVTGIFGAYALFAPWGRKMKANGMDLVKEQ
IVITEAIKGAEGANPRDLEAKLFNFLSHDDPKISQFDKG"
gene complement(74696..77335)
/locus_tag="DMACINML_00986"
CDS complement(74696..77335)
/locus_tag="DMACINML_00986"
/EC_number="2.7.7.7"
/inference="ab initio prediction:Prodigal:2.6"
/inference="similar to AA sequence:RefSeq:CAL34489.1"
/codon_start=1
/transl_table=11
/product="DNA polymerase I"
/protein_id="Prokka:DMACINML_00986"
/translation="MKTLTIIDTFGFFFRLLYALKGFKNSQGQASGMISGFANFIYSL
KNEYKSDYIIFALDSKGKTFRSDIDPNYKKNRTPPPPELLEQIPICIEMIEKMGFMSV
SCEGYEADDIIASVVKTCCKDKDIFVRIITQDKDLYQLIKNGKTSIYSPISKNDYDEEA
CLEKYGVKPYQIKDFLALCGDSSDNIPGVKIGAKGAKTLLDEFGSIEGIYENLTLVR
NERSRKLLEKGFENAFSLKSLASLYEDLEVSNNLEKADFPQDEPLLVLEILEHYELN
VLLKLRQNPDKDKNLGFKATLIQDENQLFEILNSLDQESIIAFDTEETSIDVKEAK
IVGFSFCMSENEAFYVPLTHNYLGVGKQVSLQSACKAIELIFKHFIIGHNLKYDFKII
ENNFKLSLPQKYADTMILAWLKNPSLRVNMDLALRLFNYETLHFESLVKKGENFASV
ELEKACKYAAEDAYITLRFYLYFLKNLEPHLLDLAKNYEFDFIKIIMMEENGIKLDT
HALEILMKKFESEIKILSEEIYTLCEDRFNLNSPKQVGDILFEKLLKPSGKKGKTGYS
TDEKVLNELLDKHPVSKILDYRELAKLYSTYCEPLLKALKDENSRIYSSFLQTGTA
TGRLSSKDPNLQNIHAHQYAKDYKSCFVAKEGFSFISLDYSQIELRMLAHFSEDEKL
LNAFKNDEDIHARTAIMIFGESNYETRSLAKSINFGLIYGMGYKTLKLNKIEANLAK
TYIEKYFENFTSIKSYFEKVKNEAKANGFISTLSGRKRYFDFENAKPMQVAMYERESI
NSILQGSAAIIKFAMLEIAKILDQDKRLILQIHDELIFEVKDELCENFVKKASDIME
NIVKLVKLTSSSIKWKWGLK"
gene complement(77399..77842)

```

CDS /locus\_tag="DMACINML\_00987"  
 complement(77399..77842)  
 /locus\_tag="DMACINML\_00987"  
 /inference="ab initio prediction:Prodigal:2.6"  
 /inference="similar to AA sequence:RefSeq:CAL34492.1"  
 /codon\_start=1  
 /transl\_table=11  
 /product="putative integral membrane protein"  
 /protein\_id="Prokka:DMACINML\_00987"  
 /translation="MFDLYNDINYLGFLFIVCFLSSTLLPLASEAFVVAFIKLDNFAN  
 LVLFIAITLGNTLGSLSSTYALAYLGKEKILEKYFSKSLKLDKFNANFTKFGSIYAFLT  
 FLPLIGDIFALGLGFAKYPFIKACFFISLGLKLSRYIFIIFIANSL"

gene complement(77835..78425)  
 /locus\_tag="DMACINML\_00988"

CDS complement(77835..78425)  
 /locus\_tag="DMACINML\_00988"  
 /inference="ab initio prediction:Prodigal:2.6"  
 /inference="similar to AA sequence:RefSeq:AAW34976.1"  
 /codon\_start=1  
 /transl\_table=11  
 /product="membrane protein, putative"  
 /protein\_id="Prokka:DMACINML\_00988"  
 /translation="MKKKIFEFSILFVIFISLSQSALVFIHNYLIIDYSAYEAPPQS  
 FEMLNLADQKLYHLRQNLRFHLSILAFLLTISFFFVHLFFFYISRKEKFIPIYSFFCFV  
 LMVISAIANLLEGIEQKESIFWYKAFLDVGVCLIIYLLFLDKFFQSHLFKIFFICACL  
 CTILTEFKFMDFTTPFVLPYIYLFILLILMRKKSFNV"

gene complement(78406..79110)  
 /locus\_tag="DMACINML\_00989"

CDS complement(78406..79110)  
 /locus\_tag="DMACINML\_00989"  
 /inference="ab initio prediction:Prodigal:2.6"  
 /inference="similar to AA sequence:RefSeq:AHY39596.1"  
 /codon\_start=1  
 /transl\_table=11  
 /product="membrane protein"  
 /protein\_id="Prokka:DMACINML\_00989"  
 /translation="MSNLNFHQIFEIQRQNDFKSIKKLAWVVFVSFLLCVCFQFLSII  
 LDFAYDLKLLKFNSNTNILAMVFYAIFLISYLMILKLYFVSQSKVLLISFFIAAFTQ  
 FIALLSLNYLIASPVVVDKILRIFLYGFSFLCLAIAIFCTFIFFKALKTLKENKIYF  
 TLCFIFKSAILIIYIFMFVLIYSEHSLALIIAHFMIFLFAGLLFTIYYALFAFALSK  
 NKIPNLKLISNEKENI"

gene complement(79126..79674)  
 /locus\_tag="DMACINML\_00990"

CDS complement(79126..79674)  
 /locus\_tag="DMACINML\_00990"  
 /inference="ab initio prediction:Prodigal:2.6"  
 /inference="similar to AA sequence:RefSeq:AAW34978.1"  
 /codon\_start=1  
 /transl\_table=11  
 /product="membrane protein, putative"  
 /protein\_id="Prokka:DMACINML\_00990"  
 /translation="MTQEQKISFFKIKRLSIYIFFCALYNFFYFFSYENVGSLHCEFL  
 CISGRFLCFFSWIYIVLAFIFMVVRIYFLFSSNKILYIFLLAIISLGSSFFLLENKIL  
 FLGLLALFFVFYFLFSLTLASLFKEVKMSFFFAFLFAPLVFLFFIFFENLSLLFLFLA

WHFLTFAYAFDRYETLKKLYRV"  
 gene complement(79676..82498)  
 /gene="uvrA"  
 /locus\_tag="DMACINML\_00991"  
 CDS complement(79676..82498)  
 /gene="uvrA"  
 /locus\_tag="DMACINML\_00991"  
 /inference="ab initio prediction:Prodigal:2.6"  
 /inference="similar to AA sequence:RefSeq:CAL34493.1"  
 /codon\_start=1  
 /transl\_table=11  
 /product="excinuclease ABC subunit A"  
 /protein\_id="Prokka:DMACINML\_00991"  
 /translation="MNDTIKIIGAKENNLKNIHLEIPKNKLIVFTGLSGSGKSTLAFG  
 TLYAEGQRRYIESLSAYARQFLDKVGPDPVDKIEGLTPAIAIDQKTTSKNPRSTVGTI  
 TEIYDYLRLLYARVGIQHCHQCGQKISSMSASDIVGEILKFKPGAKIIIIYAPLVREKK  
 GTYADLLENLRNKGIVRAQIDGVLVRLDEDIELSKTKKHTIKLVIDRLEIQEDLLSRL  
 ASDIEKGLEESFGEIEIEVLNPDEVGLNKHYHSEHSACFACKISFVPLEPLSFSFN  
 PKGACAACDGLGIRYTLDMKKIIDESLSLENGAVKIMYGFNKSYYYKFLIAFCEQNEI  
 PLKLPFAELSEEQKRLVLYGNAKTIDFFWKRNRKRTFEGVVKMAYEMLKDEKDLAEY  
 MSEKICKDCAGHRLRPESLAVKVASKGLGEILDMSIEDSTNFFANKKNFSYLSEQERL  
 ISEPILKEINERLFFLYDVGLGYLSLGRDARTISGGEAQRIRIASQIGSGLSGVMYVL  
 DEPSIGLHERDTAKLIKTLRNLQKQGNLIVVEHDKMTIEEADFIVDIGPKAGKFGGE  
 VVFAAGTYKELLKSKSETALYMNGKKQISQLQNRQKEWLELKNVNINNIKDLSVSFPL  
 QNLVAITGVSGSGKSSLILQTLPLPFAQEELNRAKKVKKLGGVQIEGLEKLDKVIYLDQ  
 SPIGRTPRSNPATYTGAMDEIRNLFAATKEAKMRGYKAGRFSFNVKGGRCCKCSGDGE  
 IKIEMHFLPDVMVVCDTCHGKRYNDATLEIKYKGNISEILNMSVLEASEFFAAVPKI  
 KQKLDLTKVGLDYLTGQNATLSSGGEAQRIKLAKELSRSDTGKTLIYLDEPTTGLH  
 FEDVNKLILVLQHLVDLKNVSVFVIEHNLVVIKNADYIIDMGPEGGVKGKGIISTGSVE  
 KVAKDHHKTKSYTGYLDLELKNAKS"  
 gene complement(82586..83371)  
 /locus\_tag="DMACINML\_00992"  
 CDS complement(82586..83371)  
 /locus\_tag="DMACINML\_00992"  
 /inference="ab initio prediction:Prodigal:2.6"  
 /inference="similar to AA sequence:RefSeq:CAL34494.1"  
 /codon\_start=1  
 /transl\_table=11  
 /product="putative integral membrane protein"  
 /protein\_id="Prokka:DMACINML\_00992"  
 /translation="MNFADLPYIFIGIFSGITSGLFGIGGGMIIVPSMFALGASAHHA  
 IGISVLQMIFAAIFGSYINYKKKLNLLKDGIVIGLGLLGFASFGILLQALSDVALTA  
 IFLGVSCIFFIKYAFGIKESVVKSHKSIWVKNLFIAGFTGIFAISLIGIGGGLLIA  
 PILAYFLGYDSKKVVSLSLFFVIFASISGIISFSNSGVIDAEVIHKGVLVGFASMIGV  
 FIGIKIIEKMHISAHRKILLCVYALSILATTHSLRKLKLGILAF"  
 gene 83746..84987  
 /locus\_tag="DMACINML\_00993"  
 CDS 83746..84987  
 /locus\_tag="DMACINML\_00993"  
 /EC\_number="4.1.3.27"  
 /inference="ab initio prediction:Prodigal:2.6"  
 /inference="similar to AA sequence:RefSeq:APA80634.1"  
 /codon\_start=1  
 /transl\_table=11

```

/product="Anthranilate synthase, aminase component"
/protein_id="Prokka:DMACINML_00993"
/translation="MLEMKANLYYRQILKKYPSSYFAEDSTRVVIIGIDCDFYDAKDIT
LSELKAKFYENASKEQICKYSGFFGVFSANFISLFENLPSNENKNYDFPNFLFANA
KAYLVYEKTSKMFFKYGESKYFDLKFDFIFDKKACEYKILQDFQEEKRDFIHSVEKA
KAYLLSGDIFQVVLKQLCIEHNFDSEFEYETLSELNPSAYMFYFPTQYGVVLGSSPE
FLKLIKNEIFLAPIAGTRNLDENSILKLEKDLLSDEKELSEHKMLVLDLARNDASKFG
KNTRVENLFSITRNKFVMHIVSEVYATMDKQANIFDIIGAVFPAGTLSGAPKIRALEI
INELENLDRGVYGGAVGFLNFNEDVVLAIIVIRSAFFKENKAFIASGAGIVLQSDPQ
KEYEEICAKRKALLVSFEKMAKRS"
gene 84989..86581
      /gene="trpD (trpGD)"
      /locus_tag="DMACINML_00994"
CDS 84989..86581
      /gene="trpD (trpGD)"
      /locus_tag="DMACINML_00994"
      /EC_number="4.1.3.27"
      /inference="ab initio prediction:Prodigal:2.6"
      /inference="similar to AA sequence:RefSeq:CAL34497.1"
      /codon_start=1
      /transl_table=11
      /product="anthranilate synthase component II"
      /protein_id="Prokka:DMACINML_00994"
      /translation="MILLIDNYDSFVFNISMLEENVYEGEILVVRNDKITLDEI
KALNPNYIILSPGPKHPKDSGVCLEIFKSQLNIPTLGICLGHQALGFSAEIAKLQNP
MHAKNSLIKIYNKNTIFKDFEDEVSMRYHSLEVKNLPDDFEILALSDDNVIMAMKH
KTLPYFGVQFHPESYFSEYGIKIFANFLNQEKAQVQDKKHTLGFYLVQKMSNHYLE
SEDFSEICKIIMSRDYEPLQAAALLVLISEKSLNQSLSLSSLVREILRYSKTFSD
ESDMIDICGTGDNFKSINVSTASAFILAALGVKVAKHGNRAISSSSGSTDVLDALDI
KIPDNLECALNDLQNKNLAFFHAPYFHPLVVELRELRAKLGIRTVFNVLGPLLHPN
LKLKYQMMGNYPVHKLAEVLRSLGRKRALVVRGNDGMDEISICDETKIFEVREGEI
YEVGVTPEQFGFKRAFHSEIMGGNAYENAKDLKDILSGKMQGAKFDIVVLNSMFAL
YTANKVSTPLKAKDIILEAIYSGKVMFYFRSLNDKA"
gene 86568..87167
      /gene="trpF"
      /locus_tag="DMACINML_00995"
CDS 86568..87167
      /gene="trpF"
      /locus_tag="DMACINML_00995"
      /EC_number="5.3.1.24"
      /inference="ab initio prediction:Prodigal:2.6"
      /inference="similar to AA sequence:RefSeq:CAL34498.1"
      /codon_start=1
      /transl_table=11
      /product="N-(5'-phosphoribosyl)anthranilate isomerase"
      /protein_id="Prokka:DMACINML_00995"
      /translation="MTKLIKICGIKDENNAKEISELNVDVFMGLIFAKSPRQVS
LEQAMSLSDIIHVGFKKSVGVFVDENLEFILKAIKQVKLDGVQIHRKMSEFEFK
TLKESGVFVWQVLSVGDRLLEENIYADLILFDTKGKFHGGNGESFNWDLKDFKDF
ALAGGIGTHNINEALSLKPKIIDLSKIEKENHLKDVEKIKYILKEMKK"
gene 87164..88342
      /gene="trpB"
      /locus_tag="DMACINML_00996"
CDS 87164..88342

```

```

/gene="trpB"
/locus_tag="DMACINML_00996"
/EC_number="4.2.1.20"
/inference="ab initio prediction:Prodigal:2.6"
/inference="similar to AA sequence:RefSeq:CAL34499.1"
/codon_start=1
/transl_table=11
/product="tryptophan synthase beta chain"
/protein_id="Prokka:DMACINML_00996"
/translation="MKKAYYGEFGGQFLPESAMFALNELENAFLKFAQDKTFKKELKE
LLTTYVGRPTPLYFARNLSKKYGHEIYLNKREDLNHTGAHKINNAIAQALLAKKMGKKK
IIAETGAGQHGLATATAAALLGLECEIYMGATDVQRQALNVYKME LLGAKVNAIQSGL
KTLKEATTAIQAWVGDIKNLFYVVGSAVGPYPYPMVTHFQSVIGKECKSQLKGLGK
KVDYIIAAVGGGSNAGGIFYEFIKDEAVNLIGIEAGGLGVDTPYHAATLTKGKTGIIH
GMKTKVLQDELGNILPVHSVSAGLDYPGIGPLHAFLSQSGRAKYYAITDEECMIALKL
LCKEEGIIPAIESSHALAFLEKLCPLNKKSVIVVNLSGRGDKDMQTIREYKKGMIYG
"
gene      88335..89084
          /gene="trpA"
CDS      88335..89084
          /locus_tag="DMACINML_00997"
          /gene="trpA"
          /locus_tag="DMACINML_00997"
          /EC_number="4.2.1.20"
          /inference="ab initio prediction:Prodigal:2.6"
          /inference="similar to AA sequence:RefSeq:CAL34500.1"
          /codon_start=1
          /transl_table=11
          /product="tryptophan synthase alpha chain"
          /protein_id="Prokka:DMACINML_00997"
          /translation="MVDFTKFKYKDKANVAYMVLGYPNLKISEEFLKRLDESSIDVLEL
GIAYS DPIADGEI IANA AKIALEQGADIHKIFELLAKIKTKKALVFMVYYNLI FSYGL
ENFVKKAKALGISALIVPELSYEESKPLYKECQKYDIALITLVSITTPKERVEELVKN
AKGFIYLLASVGITGGQSVDNKLLQEKIQEIRSFTKLPYIYIGFVKNNTDVRNMRKLA
DGVIVGTNIVKLFASNDVNQILKGVVEEIFEK"
gene      89154..89576
          /locus_tag="DMACINML_00998"
CDS      89154..89576
          /locus_tag="DMACINML_00998"
          /inference="ab initio prediction:Prodigal:2.6"
          /inference="similar to AA sequence:RefSeq:ADN90556.1"
          /codon_start=1
          /transl_table=11
          /product="hypothetical protein"
          /protein_id="Prokka:DMACINML_00998"
          /translation="MLKVLEYSITHFFEHILRLRIEKAEDIVGELYGASIPIMEKSGR
EYHFYLFPPKEFLQTIANILVRDEKFKEDDWCDLSKECANQIIIGYAKNLLNDAKGDDE
YKLG IPEYLGRVDFSSIIILDES LTYGFENHYFRIGYCK"
gene      89576..89884
          /gene="fliN"
CDS      89576..89884
          /gene="fliN"
          /locus_tag="DMACINML_00999"

```

```

/inference="ab initio prediction:Prodigal:2.6"
/inference="similar to AA sequence:RefSeq:ADN90557.1"
/codon_start=1
/transl_table=11
/product="Flagellar switch protein FliN"
/protein_id="Prokka:DMACINML_00999"
/translation="MGSDIDFGDRHGLLQSYEDILDITVDFVSELGTTNMSVAELLKL
EVGSVIDLEKPAGEVELYINKRIFGKGEVMVYEKLNLAIRINEILDSTKTVLQYFKKEI
"
gene      89884..90675
          /locus_tag="DMACINML_01000"
CDS      89884..90675
          /locus_tag="DMACINML_01000"
          /inference="ab initio prediction:Prodigal:2.6"
          /inference="similar to AA sequence:RefSeq:ADT65731.1"
          /codon_start=1
          /transl_table=11
          /product="putative transmembrane protein"
          /protein_id="Prokka:DMACINML_01000"
          /translation="MKVLLLSILALPLFAAELISYNIYDRNDRVDLMLSFD SAYGGKI
SQQKEKNLTLTFSDLKYSKEELKSLNSGLVDKISSSKDNNTYIMLQNKQPVSLLELS
SINDKFGVRIRAVQQGKESINPEQNNLSTNEEPILNSKKTSLLEGYDYTYILVMLVLF
ILLIVLWVKRTLAFKNAGISRDFHVVVFQRFLDKNNQLIVFEYASKRYTMIVGNSNIV
LEETEISDYEPKTTEKSEKNFDSFFEENKKRIQNLIQRQKNKKS"
gene      complement(90672..92132)
          /locus_tag="DMACINML_01001"
CDS      complement(90672..92132)
          /locus_tag="DMACINML_01001"
          /EC_number="3.6.1.40"
          /inference="ab initio prediction:Prodigal:2.6"
          /inference="similar to AA sequence:RefSeq:CAL34504.1"
          /codon_start=1
          /transl_table=11
          /product="phosphatase"
          /protein_id="Prokka:DMACINML_01001"
          /translation="MAKKTAVVDLGSNSIRMVVF EKTSRYSFYTTCEYKRKVRLENA
YNNGKILQEDSMQRAENALAFFKQCALKHCKKIFIIIGTSALRDAPNSKDFIKRIKDK
LNLNIRCIDGKNESYLGGLATLNLSPFRDGTTLDIGGGSSELCLIKNNKIISCISLD
IGTVRLKELFYDKGKTDALDDFINPILEQIPSEFCNQNLIAIGGSLRAISNSIMQKNS
YPLKNIHDFRYMLEDEKEHILKIFNCKADALINFGIKKDRFDTIKEGIFIFLKIAEKL
KTKQIITSGVGIREGIYLDLLRPKHTFPINFNPSLKS LQDRFLQGNINNKTPYFSMQ
IFKVLQTLHKIHEKYQSLLNAAKLCHLGEYLN FYFANEHSAYFILNGLNYGFSSHQEK
VLIATLIRLNGKKNVYPNLEPYKQLLPNTHIISWLNFI LSLAKILSTNENKIEIAFAN
NTLYIYSESKILDLPKDELKKITKPATIALAINQKP"
gene      complement(92132..92377)
          /gene="fdxA_2"
          /locus_tag="DMACINML_01002"
CDS      complement(92132..92377)
          /gene="fdxA_2"
          /locus_tag="DMACINML_01002"
          /inference="ab initio prediction:Prodigal:2.6"
          /inference="similar to AA sequence:RefSeq:ADN90560.1"
          /codon_start=1
          /transl_table=11

```



```

        /product="Ferredoxin"
        /protein_id="Prokka:DMACINML_01002"
        /translation="MALLITKDCVCCDACREECPEAIYEHSPYIYVIDADLCSECVND
        FSEPACIVACPYECIIPDPDNVESIEELKLNRRREF"
gene    complement(92491..93162)
        /locus_tag="DMACINML_01003"
CDS     complement(92491..93162)
        /locus_tag="DMACINML_01003"
        /inference="ab initio prediction:Prodigal:2.6"
        /inference="similar to AA sequence:RefSeq:CAL34506.1"
        /codon_start=1
        /transl_table=11
        /product="two-component regulator"
        /protein_id="Prokka:DMACINML_01003"
        /translation="MRILVIEDEISLNKTIIDNLNEFGYQTDSSSENFKDGEYFIGIRH
        YDLVLASWNLPDGDGAELVNTIKHKSPRTSVMIMSAKTDKDEIKALKAGADDFVKKP
        LDFDILLARIEARLRLGGTNVIKIEDLVIDPDEEKITYKGQDIELKGGKPFVLTHLAR
        HSDQIVSKEQLLDAIWEPELVTPNVIEVAINQIRQKMDKPLNISTIETVRRRGYRFC
        FPKKS"
gene    complement(93241..93558)
        /gene="folB"
        /locus_tag="DMACINML_01004"
CDS     complement(93241..93558)
        /gene="folB"
        /locus_tag="DMACINML_01004"
        /EC_number="4.1.2.25"
        /inference="ab initio prediction:Prodigal:2.6"
        /inference="similar to AA sequence:RefSeq:CAL34507.1"
        /codon_start=1
        /transl_table=11
        /product="putative dihydroneopterin aldolase"
        /protein_id="Prokka:DMACINML_01004"
        /translation="MQSYINIKMQFKCIIIGILKFERKKKQKVCVHLKAKANDFLDYAK
        VSKKIKKYYKKEQFLTLEESLEFVCAKLHKKFPQIYYIKISTYKPEIIKNTRVGVKLLK
        KFY"
gene    complement(93543..94154)
        /locus_tag="DMACINML_01005"
CDS     complement(93543..94154)
        /locus_tag="DMACINML_01005"
        /inference="ab initio prediction:Prodigal:2.6"
        /inference="similar to AA sequence:RefSeq:CAL34508.1"
        /codon_start=1
        /transl_table=11
        /product="putative integral membrane protein"
        /protein_id="Prokka:DMACINML_01005"
        /translation="MENLIIYAIAYLLGSIPFGLILAKQFAKINIQNQGSKSIGATNV
        LRVVKEKDPVLAKKLAIATIIILDFAKATIPLLLILKFLNYDLNLLWTVAVLTVFGHCF
        IYLLFEGGKGVATGAGAMIVLLPLELLTAFIVWFIVGKIFKISSLASLLALLVFIGSS
        FIFNYDMQTIKTHAPVFIIAFIIIYKHLPNIKRLVFKEECKVI"
gene    94333..95358
        /locus_tag="DMACINML_01006"
CDS     94333..95358
        /locus_tag="DMACINML_01006"
        /EC_number="1.11.1.5"

```

```

/inference="ab initio prediction:Prodigal:2.6"
/inference="similar to AA sequence:RefSeq:CAL34509.1"
/codon_start=1
/transl_table=11
/product="putative cytochrome C551 peroxidase"
/protein_id="Prokka:DMACINML_01006"
/translation="MKVKSLLIASLVAFSSLNAQSLIEEAKNSGLVALPKDQKGVDEI
LKANGVKATEFTLDKVELGKKLYFEPRLSKSGIISCNTCHNLGLGGADGISA AVGHKW
TANPHHLNSPTVYNAVLNTTQFWDGRAGTLADQAKGPIESEAE MATPAKLAVEKIASL
PEYVAEFKKIYGKSGVNF DNIADAIANFERTLITPSRFDNFLNGDEKALTKEEQKGLK
LFIDKGCVACHNGVNLGGNMQAFEVAGKYKFANL GDFKGDENGMVKTPTLRNVVETAP
YFHNGAIWKL TDAIKEMGSVQLGIQISDKEAKSIETFLKSLTGTKPAVVYPQLPVSTE
KTPKPEL"
sig_peptide 94333..94392
/locus_tag="DMACINML_01006"
/inference="ab initio prediction:SignalP:4.1"
/note="predicted cleavage at residue 20"
gene 95449..96789
/locus_tag="DMACINML_01007"
CDS 95449..96789
/locus_tag="DMACINML_01007"
/inference="ab initio prediction:Prodigal:2.6"
/inference="similar to AA sequence:RefSeq:ASQ31647.1"
/codon_start=1
/transl_table=11
/product="phosphoglucosamine mutase"
/protein_id="Prokka:DMACINML_01007"
/translation="MMKLFGTDGVRGKAGEFLDSFLAMRLAMAAGIYFKDKSVTNNIL
VGKDTRRSGYMIENAIIVSGLTSIGYNVIQIGPMPTPAIAFLTEDMRC DAGIMISASHN
PYYDNGIKFFDAHGNKLSIEDIEKKIEEIIYDDKLIQSSKVDMEKIGQAKRIDDVIGRY
IVSIKNSFPKDL TLKSLRVVLDVAHGAAYKVAPT VFKELGAEVIVMSDKPNGLNINEN
CGALHPSNLAAEVKRLRADVGF AFDGDADRLVVVDEKGEVANGDSL LGVLALFLKEQG
KLKSSVATIMSN GALKEFLNQHGIELDTCNVGDKYVLEK LKAKGGNFGGEQSGHIIIF
SDYAKTGDGLIAALQFSALMLCKKKSASTILEQIKPYPQLL TNLKISEKKDLDKIKGL
KELKQDLENKNINVLFRYSGTENLIRLLLEAKDAKILEKEMKNVVEFFKKALNG"
gene 96782..97240
/locus_tag="DMACINML_01008"
CDS 96782..97240
/locus_tag="DMACINML_01008"
/EC_number="3.4.23.36"
/inference="ab initio prediction:Prodigal:2.6"
/inference="similar to AA sequence:RefSeq:CAL34511.1"
/codon_start=1
/transl_table=11
/product="lipoprotein signal peptidase"
/protein_id="Prokka:DMACINML_01008"
/translation="MVKKYKTILIFILVFIVVFAFDQWVKS LTL SGLRWQSEYLDLTY
ALNTGVAFSMFSFLEHYLKY LHLALILALFIYLLWQKQFLREHLVAFGMMLGAGCSNL
LDRFIHGGVDMF FWHKWFHFAIFNVADVMINISVVLILLKEIFIKKGKK"
gene 97237..97689
/locus_tag="DMACINML_01009"
CDS 97237..97689

```

```

/locus_tag="DMACINML_01009"
/inference="ab initio prediction:Prodigal:2.6"
/inference="similar to AA sequence:RefSeq:CAL34512.1"
/codon_start=1
/transl_table=11
/product="putative integral membrane protein"
/protein_id="Prokka:DMACINML_01009"
/translation="MTEWINEYYFWIKWVHYLAFVSWMAGLFYLPRLFVYHAENKDNK
GFVDVVKIQERRLYFGIQNPAMIATVISGSLMLHAHKEVLMVSGFMHAKLTCATLLI
IFHIHNYFCLKALANDTSTKSGRYFRIYNEFPTLMFIIIIALMMVIRPF"
gene complement(97721..99031)
/locus_tag="DMACINML_01010"
CDS complement(97721..99031)
/locus_tag="DMACINML_01010"
/inference="ab initio prediction:Prodigal:2.6"
/inference="similar to AA sequence:RefSeq:AAW35001.1"
/codon_start=1
/transl_table=11
/product="radical SAM domain protein"
/protein_id="Prokka:DMACINML_01010"
/translation="MNLFQNLALKYSHAMMEKSLHKSFNVELLKNPQEKQAKQDKSYM
LYAHIPFCHTFPCYCSFHKYYYDEELAKIYFENLRKELVLIKDKGDFNSMYVGGTT
LINENELLKTLELCKKLFNIKEISCESDPNHIPEKLSMFKGIIDRLSCGIQSFDEI
LKKIARYNKFSSKQLQEKISKALGILPIFSLDLIFNFPSQTEEQLLNDLEIAKNLAP
QQITTYPLMKSNTKDNIAKSLGVEIKDNEFKYYQMIRDFFKDYQQNNGWSFSLEKNQ
LNDEYVSSHHEYLGVGSGAFSFLDGELLINAFDLNDYAKMIQEQNANIAKASFTQKE
IIKYIFLTEMFAGKIQIDKFNQTLNCDLEKELFKELLGLKISNAIKKENGTLITSEFG
QYLFVVLKDFYTGMDLVRVFRDSKRLKNKDFINIMKENISSI"
gene 99155..99406
/locus_tag="DMACINML_01011"
CDS 99155..99406
/locus_tag="DMACINML_01011"
/inference="ab initio prediction:Prodigal:2.6"
/inference="similar to AA sequence:RefSeq:CAL34514.1"
/note="hypothetical protein Cj0364"
/codon_start=1
/transl_table=11
/product="hypothetical protein"
/protein_id="Prokka:DMACINML_01011"
/translation="MDKTKVVENLNALFKQRAEFYSYFDKNISKVGNTEVFDFNSNAKD
LNAEEVYKQFYHLDYAMRLLPAIYKAYEVSDDLNRDF"
gene complement(99437..100915)
/locus_tag="DMACINML_01012"
CDS complement(99437..100915)
/locus_tag="DMACINML_01012"
/inference="ab initio prediction:Prodigal:2.6"
/inference="similar to AA sequence:RefSeq:CAL34515.1"
/codon_start=1
/transl_table=11
/product="outer membrane channel protein CmeC (multidrug
efflux system CmeABC)"
/protein_id="Prokka:DMACINML_01012"

```

```

/translacion="MNKIISISVIASLSLFIACSLSPNLNVPENYSLDNKLGALSW
EKENNHTLSKEWKEFDDEKLNQVVDLALKNNNDLKLAFIHMEQAAAQLGIDFSDLLP
KLDGSASANRAKTAINAPSNRTGEVSYGNDFKMGLDLSYEIDLWGKYRDTYRASKSGF
KASQYDYEAARLSIVSSVVQTYFNFVNANENEKALKDAYDSAQEIQINYEKFQVGAV
GEYEIAQSRANLESTALQYNEAKLNKENYLKALKILTSNDLNDILYQDQAYQVFKLKD
FDIPSGISSTILLQRPDIGSSLEKLTQQNYLVGVARTAFLPNLSLTGLLGFESGLNT
LVEAGSRTWNIGGNFTMPIFRWGEIYQNVNLAKLNKDEAFVNYQNTLVAAFGEIRYAL
IARKTIRLQYNNAQASELSYKRIYEISKERYDVGEMSLQDYLRARQDNLNATVAFNNT
KYSYANSIVNVIKAFGGGFENEDIGKNIEEESKNLDMSFRE"
sig_peptide complement(100844..100915)
/gene="cmeC"
/locus_tag="DMACINML_01012"
/inference="ab initio prediction:SignalP:4.1"
/note="predicted cleavage at residue 24"
gene complement(100908..104030)
/locus_tag="DMACINML_01013"
CDS complement(100908..104030)
/locus_tag="DMACINML_01013"
/inference="ab initio prediction:Prodigal:2.6"
/inference="similar to AA sequence:RefSeq:APA48798.1"
/codon_start=1
/transl_table=11
/product="multidrug efflux RND transporter permease
subunit"
/protein_id="Prokka:DMACINML_01013"
/translacion="MFSKFFIERPIFASVVAIIIISLAGAIGLVNLPYQPSLTPPTV
KVSATYTGADAQTIATTVANPIEDAINGADNMIYMDSTSSSSGTMNLTVYFNIQTDPD
QATIDVNNRISAATAKMPDEVKKGVTVRKTSSTTLAAISMYSSNGSMSAVDVYNYIT
LNILDELKRVPVGDANAIGNRNYSLRIWLKPDLLNKFATATDVIAAVNDQNAQYAT
GKIGEEPLTQKSPYVYSITMQGRLQSPSEFENIILRTNEDGSFLRLKDVADIEIGSQQ
YKSQGRNLGNDAVPIMINLQSGANALNTAKLVEAKMQELSKSFPEGLEKIPYDITTKF
VIESIKEVVKTFVEALILVIVMYMFLKNFRSTLIPMIAVPVSLGLTFAGLYLLGFSI
NLLTLFALILAIGIVDDAIIIVVENIDRILHEDENISVKDAAIQAMQEVSSPVISIVL
VLCVAFIPVSFISGFVGEIQKFALTLAISVTISGFVALTLTPSLCALFLRRNESKPF
YIVQKFNDFFDWTSTIFSAGVAYMLKRTIRFVLIFCMLGAIIFYLYKQVPGSLVPEED
QGLMIGIINLPSASALHRTISEVDSMSQEILKTNGVKDAMAMIGFDLFTSSLKENAAA
MFIGLEDWKDRNVSADIEIMELNKKFAPDRNAASVFRGLPPIPGLSITGGFEMYVQNK
SGKSYDQIQEDVNKLVAANQREELYGVRTTLDTSFPQYKLIIDRDKLKHFNLNMQDV
FSTMNATIGTYVNDFTMLGKNFQVNIRAKGDFINTQNALKNIFVRSNDGKMIPLDSF
LTLQRSSGPDDVKRFNIFPAAQIQGQPAPGYTSGQAIEAISQVAQETLSDDYISIAWSG
SAYQEVSSKGTGSYAFALGMVFLVFLILAAQYERWLIPLAVVTAVPFAVFGSFLLVYLR
GFTNDIYFQTGLLLLIGLSAKNAILIVEFAMEERFKKGKIFDATIAAAKLRFRPIVM
TSLAFTFGVLPIMIFATGAGSASRHSLSLGTGLIGGMIAASTLAIFFVPLFFYLLENFNEW
LDKRRGKVHE"
gene complement(104030..105133)
/locus_tag="DMACINML_01014"
CDS complement(104030..105133)
/locus_tag="DMACINML_01014"
/inference="ab initio prediction:Prodigal:2.6"
/inference="similar to AA sequence:RefSeq:APA80655.1"
/codon_start=1
/transl_table=11
/product="RND efflux system, membrane fusion protein CmeA"
/protein_id="Prokka:DMACINML_01014"

```

```

/translacion="MNSFQKNTLLLLSALFLFSACSKEEAPQKQIPQSVSTMSVKAENLPLSFTYPAKLVSDYDVIKQVSGVIVEKLFKAGDLIKKGQTLFIIIEQDKFKASVNSAYGKALMARANFDNASKDYNRSKTLNKGSAISQKEYDSALANFNNTKANLTSARADLENARIDLAYTEIKAPFDGIVGDALINIGDYVNSSSTELVRITNLNPIYADFYISDSDKLNIVRNTQDQKWDLSNIYADLNLNGEVVKGLYFIDSVIDADSQVTKAKAVFDNNDSTLLPGAFATITSNGFIQKNGFKIPQIAIKQDQNEVYVFLLEKQKAVKAPVHISYQDNEYAVIDKGLQNGDKIILDNFKKIRLDSEVKEVGAQ"
sig_peptide complement(105065..105133)
/locus_tag="DMACINML_01014"
/inference="ab initio prediction:SignalP:4.1"
/note="predicted cleavage at residue 23"
gene complement(105241..105876)
/locus_tag="DMACINML_01015"
CDS complement(105241..105876)
/locus_tag="DMACINML_01015"
/inference="ab initio prediction:Prodigal:2.6"
/inference="similar to AA sequence:RefSeq:APA80656.1"
/codon_start=1
/transl_table=11
/product="Transcriptional repressor of CmeABC operon, CmeR"
/protein_id="Prokka:DMACINML_01015"
/translacion="MNPKNKAPSKKVLARREKIKNVAFDLFLTKGFQETSLSDIIKLSGGSYSNIYDSFHSKEGLFFEILDVCKKHFDLIASQTQTIKNENLKEFLTSFGLTFVDFI FNQVQTVAFGKIIFSQVYDKHKHVKNWIENNQKIFSYSILIELFKKQNSSYISNNAQK LAVLFCAMLREPYHSLNVLADTPLMSEQEQQEHVDFIVNIFLKGIEKNTSI"
gene complement(105863..107239)
/locus_tag="DMACINML_01016"
CDS complement(105863..107239)
/locus_tag="DMACINML_01016"
/inference="ab initio prediction:Prodigal:2.6"
/inference="similar to AA sequence:RefSeq:CAL34519.1"
/codon_start=1
/transl_table=11
/product="putative ferredoxin domain-containing integral membrane protein"
/protein_id="Prokka:DMACINML_01016"
/translacion="MENHITNYTKKRYFTYLVATIVIFCLPFVTINGNHFFLLSFDHS KLNLFFISFSTQELYLMPFLLIFLFLFIFFITTLGGRIWCAWSCPQTI FRVIYRDIIQ TKLLKIRKNINNKKQKEYEGYFFKKIIGVILFYFISLLAVSNLLWYFVPPEDFFAYIQN PGEHLLLLGILFCASLFLTLDITYLAEKFCIYVCPYARVQSVMFDRDTMQVIYDEKRG GVIYDGHTKLYKKPPEGECIGCEACVSICPTHIDIRKGMQLECI NCLECADACSKVQS KFNRP SLINWTSVKAIETRKKVNYFRFRTIAYFIVLLIALIALIIMGSKKENMLLNIN RSSELYQISHTHKIEISNAYTFLFQNTDSKTHEYYFEASLEGIDNGIEIIRPSKAFT LKAGEQAKKIVIKATKKLADNDQKDVIFPLHIKAYAKDNKEIVIFRESIFVYPKSTI LKGYNESK"
gene 107385..107597
/gene="rpsU"
/locus_tag="DMACINML_01017"
CDS 107385..107597
/gene="rpsU"
/locus_tag="DMACINML_01017"
/inference="ab initio prediction:Prodigal:2.6"
/inference="similar to AA sequence:RefSeq:ADN90575.1"

```

```

/codon_start=1
/transl_table=11
/product="30S ribosomal protein S21"
/protein_id="Prokka:DMACINML_01017"
/translation="MPGIKHPNESFDEAYRKFKKQVDRNLVVTEVRARRFFPEMTEI
RKKQKISARKKMLKRLYMLRRYESRL"
gene 107798..108400
/locus_tag="DMACINML_01018"
CDS 107798..108400
/locus_tag="DMACINML_01018"
/inference="ab initio prediction:Prodigal:2.6"
/inference="similar to AA sequence:RefSeq:CAL34521.1"
/codon_start=1
/transl_table=11
/product="putative flagellar motility protein"
/protein_id="Prokka:DMACINML_01018"
/translation="MKKIKKIIQIGMISGLTAVAGGALVGCSSNDNSDTLNQAANAQ
GAFVIIIEEIAPGQYKIKDQFPSDETRVVLKDIINGTERVLSKEEMDALIKEEAAKIDNG
TSNLTKEGGQISSGGLSLGETLLASAAGAILGSWIGSKLFNNQNFANQQRGAFSNQSA
YQRSVNSFNKAGAAGSASSASKSGFFGGGSKSSSSSSFGS"
sig_peptide 107798..107860
/locus_tag="DMACINML_01018"
/inference="ab initio prediction:SignalP:4.1"
/note="predicted cleavage at residue 21"
gene 108410..109579
/locus_tag="DMACINML_01019"
CDS 108410..109579
/locus_tag="DMACINML_01019"
/EC_number="6.3.1.8"
/inference="ab initio prediction:Prodigal:2.6"
/inference="similar to AA sequence:RefSeq:CAL34522.1"
/codon_start=1
/transl_table=11
/product="putative glutathionylspermidine synthase"
/protein_id="Prokka:DMACINML_01019"
/translation="MRVVQVEKLQKDYLESIGFSWHSDEGDSDYISDKLVCSSENEAN
AYYEAVNELYDMFVAAAQNVIDNNRFDELGIPFNLIDAIKMSWENEVHWHLYGRFDLA
GGLDGKPIKLIENADPTALFESAILQWAILKQNGMDESKQFNSIYESLMDNFKRLI
TLEEDTQGFEEYYQGWKILFSSVAGSKEEEITTKLLAHIANEAGFQTDFFSFDVEVEFS
EEGIFKEGVNVEYWFKLVPWEDIAIEEGELAMLLTQIMRNQKAIILNPAYTLFLQSKG
ILKILWELFPNHPLLETRDTPLEGKDYVKKPVFGREGANISIIKEGKILHENVGPYG
NNKNIYQEYVEFNSHDNEYQAGVFFAYEGCGLGFRKGGLVLDNYSKFGVGHVIEG"
gene 109584..110519
/locus_tag="DMACINML_01020"
CDS 109584..110519
/locus_tag="DMACINML_01020"
/inference="ab initio prediction:Prodigal:2.6"
/inference="similar to AA sequence:RefSeq:CAL34523.1"
/codon_start=1
/transl_table=11
/product="putative D-2-hydroxyacid dehydrogenase"
/protein_id="Prokka:DMACINML_01020"
/translation="MKIVCLDAATLGGYDLSIFKHFGFQSYALTDRKETIERLKDAD
VMTNKVVIDKEVMDACPNLKLILETATGVNNIDVEYAKEKGIIVKNAAGYSTMSVVQ

```

HTFAFIFAFLNHIPYYDKWSKEGKWCDSPIFTDFSRILNSMEGKKHGIIGLSIGKEV  
AKISSAFGAKICYSTSGLNQNAEFECNLLEELLRTCDIVSIHAPLNEKTKNLLTYEK  
LKLLKDNAILVNVGRGGIINENDLAKIIDEKNIRVGLDVLSESEPMVKNHPLLNKKE  
NLIITPHVAWASKEAVEKLSMVYDNLKEWIENGK"

gene 110509..111000  
/locus\_tag="DMACINML\_01021"

CDS 110509..111000  
/locus\_tag="DMACINML\_01021"  
/inference="ab initio prediction:Prodigal:2.6"  
/inference="similar to AA sequence:RefSeq:CAL34524.1"  
/note="conserved hypothetical protein Cj0374"  
/codon\_start=1  
/transl\_table=11  
/product="hypothetical protein"  
/protein\_id="Prokka:DMACINML\_01021"  
/translation="MASEHSFDISAALDKQELKNAFEQAKKELDSRYDLKGIKCEIEF  
SEKDSVFKLHSSSEAKLDVLKDIVISKLIKRGINSNAIKELSRESGAMFRLNLKANDS  
IDSENAKKINKAIKDSKLVSSSIRGDEIRVAKQIDDLQAVMKMKVKELNLELNLFSK  
NLK"

gene 111011..111481  
/locus\_tag="DMACINML\_01022"

CDS 111011..111481  
/locus\_tag="DMACINML\_01022"  
/inference="ab initio prediction:Prodigal:2.6"  
/inference="similar to AA sequence:RefSeq:CAL34525.1"  
/codon\_start=1  
/transl\_table=11  
/product="putative lipoprotein"  
/protein\_id="Prokka:DMACINML\_01022"  
/translation="MKKIFIFLLLLFFSACALKNQDYSSQMKMKVVFNTPAIKINDFGF  
LKKENKALNLEVYKLGQAFFKLIKIREDICLNSVCYSKTVFNQKFFKNAYYEDILKDIL  
EAKPLWNGKDMQKTQCGFNQSLNSANYEIFYEVCDNKISFFDKTSHIKIILVKF"

sig\_peptide 111011..111064  
/locus\_tag="DMACINML\_01022"  
/inference="ab initio prediction:SignalP:4.1"  
/note="predicted cleavage at residue 18"

gene 111491..112312  
/locus\_tag="DMACINML\_01023"

CDS 111491..112312  
/locus\_tag="DMACINML\_01023"  
/inference="ab initio prediction:Prodigal:2.6"  
/inference="similar to AA sequence:RefSeq:CAL34526.1"  
/codon\_start=1  
/transl\_table=11  
/product="putative periplasmic protein"  
/protein\_id="Prokka:DMACINML\_01023"  
/translation="MKIGLLLFCVSLICAKIYKGEIYFYDLKDKQIFAIIVYDNPV  
PIFDRDVNQTSSTFLILSDLTNIEIALFQTANSWEDEQKKYRISSSKELMFDNKTIQ  
GDRLGTTTLELIKEQNNTRIKRSLDFLVYKDEIREFHPIHKQVVSFEQIRQKPIVLKD  
GKLGFEWYFYEEDSRAILELNNFVDMKKVFLNLNELYVDNLKFKELLHQKLL  
VCDECFFDMEQVSFNNNFLTNSGLRLCYLPYENHYLDENICVDFNENEIKEFKK"

gene 112314..114026  
/locus\_tag="DMACINML\_01024"

CDS 112314..114026

```

/locus_tag="DMACINML_01024"
/inference="ab initio prediction:Prodigal:2.6"
/inference="similar to AA sequence:RefSeq:ASQ32863.1"
/codon_start=1
/transl_table=11
/product="AAA family ATPase"
/protein_id="Prokka:DMACINML_01024"
/translation="MVRKKEFLSLKNIIEESQIYKELKCSKNEALILRELCKNYVISIS
SINAFTLLTGIFGSEKYSYLDLTLKRLIERGFINQNSGFFKNIENKSNQLTSLLL
QSELSLSEYFLEFLEAKPRLNLDKKEAYGEYLEYKDEFMRVELYERLSFIRSSAYS
ELKAQIKLYEKYIKERLKKSKFYNILADIFKEYNLEGKEQIIFLALLKEEYTLNENS
VSREINSLLSLSENDLEKHKNSLLQENAPLLNLIIEYDEYLNAFGDISKSFFITDEI
LQRIINFEPKQNKKIKIENVLKEQDIFELIEPSIDINDIIMPQNTKELLENILKQQDK
KVLERLNSWGIKSNKNIIEAKIIFYGPAGTGKTMSALAMAKSMKKTVLSFDCSKILSKW
VGESEQNVRKIFDQTYKNIVQTCQSPILLNEADQFLSTRVSSSGSDKMHNMQNIIF
LEQIERFNGVIIATTNLFESLDSAFSRRFDYKIEFKKPDFKDRLLKMWKFLPRKASFE
KAFDVNLANEYELSGAQILMVVKNLTKVAVTEDGVFKMQDFIESIQKELNSSFDKSK
IVGF"
gene complement(114023..114571)
CDS /locus_tag="DMACINML_01025"
complement(114023..114571)
/locus_tag="DMACINML_01025"
/inference="ab initio prediction:Prodigal:2.6"
/inference="similar to AA sequence:RefSeq:AAW35016.1"
/codon_start=1
/transl_table=11
/product="membrane protein, putative"
/protein_id="Prokka:DMACINML_01025"
/translation="MHAKYFKFLAYFAFLASLIYGFYHILKAFDFVKEAYIYTGIFAL
IFLNLSSLFSLCKFKKTKSYPKLLGIFAAFWAFHLFLNYFIFDRNANFLRLFDDISHR
LLEASGFFAFIIFFMFLSSFRVFKRIEKIRKLGIVCLVLASYHYFLSPKVPWFWEWS
ALILSLVYFAIRYLRFLKPKKS"
gene complement(114571..115464)
CDS /locus_tag="DMACINML_01026"
complement(114571..115464)
/locus_tag="DMACINML_01026"
/inference="ab initio prediction:Prodigal:2.6"
/inference="similar to AA sequence:RefSeq:CAL34529.1"
/codon_start=1
/transl_table=11
/product="putative molybdenum containing oxidoreductase"
/protein_id="Prokka:DMACINML_01026"
/translation="MIITPEKLYQRRDFFKLGAGALIGSSLIASKLSALNFINDTNA
NKLEISDEELATNYINFYEFSTDKRRAVSLAQNFNTQNWKIDISGEIEKPLSLSMEDI
LKFPLEERIYRFRVETWSMVVPWVGFELRRLIDMAKPTSEAKFIKFTLLDKNQFPD
QDALFPTVDYPYVEGLRMDEAMHPLTLLAVGMYKKALKPQNGAPIRLVVPWKYGFKSI
KSIVKIEFVKEQPISTWEKYAPNEYGFYANVNPVSHPRWSQANERLALGDFFTKPTLM
FNGYEKEVASLYAGMDLKANY"
gene complement(115526..116305)
CDS /locus_tag="DMACINML_01027"
complement(115526..116305)
/locus_tag="DMACINML_01027"
/inference="ab initio prediction:Prodigal:2.6"
/inference="similar to AA sequence:RefSeq:ADC28003.1"

```



```

/note="conserved hypothetical protein"
/codon_start=1
/transl_table=11
/product="hypothetical protein"
/protein_id="Prokka:DMACINML_01027"
/translation="MNYQQLCEDYFNLYNQFLSVDFQISLFEKNHKSLLKDFIFFYHQ
ILKQKDLNLFLLGVRNKIALKVHNYMQEYSTSPKDLSLICLREHKHIEFFQRFYKALAY
FVSRKRLDDEEQMKMNLISNIEHYFGCHFNSDFNQLQNFQKNDFFTLPEKCLQYFHL
AMIHLCFMVLNPLNFKDSNRHLDKAINYLIDGTFEIYELIFKEYFLLFPKDEELKNEL
KKLKNLEFKILMQETSRIKLLNHYKEFCEEIFYNIELEKII"
gene complement(116302..117141)
/gene="pyrF"
CDS /locus_tag="DMACINML_01028"
complement(116302..117141)
/gene="pyrF"
/locus_tag="DMACINML_01028"
/EC_number="4.1.1.23"
/inference="ab initio prediction:Prodigal:2.6"
/inference="similar to AA sequence:RefSeq:CAL34531.1"
/codon_start=1
/transl_table=11
/product="orotidine 5'-phosphate decarboxylase"
/protein_id="Prokka:DMACINML_01028"
/translation="MKLCVALDLATKEECLRLAKDLKGLDLWLKVGLRAYLRDGFKFI
EELKKIDFKIFLDLKIHDIPNTMADACEEISKLGVDMINIHASAGKVAMQEVMTRLN
RLNKRPLVLAVSALTSFDEENFYSIYKQNIDEAVINFSRMSYQNGLDGMVCSVFESKK
IKEHTSSNFLTLTPGIRPFGETSDDQKRVANLTMARENLSDYIVVGRPIYKNEDPRAV
CEKILDKIHRKNISENDIEQNYEAIQQKEWDMCNHFEWIKTQPDKEQALKEFYTKCG
IKY"
gene complement(117138..117536)
/gene="nusB"
CDS /locus_tag="DMACINML_01029"
complement(117138..117536)
/gene="nusB"
/locus_tag="DMACINML_01029"
/inference="ab initio prediction:Prodigal:2.6"
/inference="similar to AA sequence:RefSeq:CAL34532.1"
/codon_start=1
/transl_table=11
/product="transcription termination protein"
/protein_id="Prokka:DMACINML_01029"
/translation="MATRHQVRQSVISLLYALEMNEKNENFIDEFLNEKKIRNEQKNF
TLSLYEGIIKNLDDIDKLNLPYLNENEIEKLGHIERAILRLGAYELLFTDTPNAIVIN
EAIELAKELANDNSPKFINGVLDLTVKAKQ"
gene complement(117536..118000)
/gene="ribH"
CDS /locus_tag="DMACINML_01030"
complement(117536..118000)
/gene="ribH"
/locus_tag="DMACINML_01030"
/EC_number="2.5.1.9"
/inference="ab initio prediction:Prodigal:2.6"
/inference="similar to AA sequence:RefSeq:CAL34533.1"
/codon_start=1

```

```

/transl_table=11
/product="6,7-dimethyl-8-ribityllumazine synthase"
/protein_id="Prokka:DMACINML_01030"
/translation="MTIIEGKLNLDSENTKIAIINARFNHIITDRLVEGARDAFLRHGG
KEENLSLILVPGAFELPFALKKAIESKKFDAICCVGAVIRGSTPHFDYVSAETTKGIA
NVSLNHNIPVSGVLTDTTIEQAIERAGSKAGNKGFEAMTTVIEMLNLSKEL"
gene complement(118002..118814)
/locus_tag="DMACINML_01031"
CDS complement(118002..118814)
/locus_tag="DMACINML_01031"
/EC_number="2.5.1.55"
/inference="ab initio prediction:Prodigal:2.6"
/inference="similar to AA sequence:RefSeq:CAL34534.1"
/codon_start=1
/transl_table=11
/product="3-deoxy-8-phosphooctulonate synthase"
/protein_id="Prokka:DMACINML_01031"
/translation="MKKMILIAGPCVIENKDLVFKVAQNLQEFNENENIEFYFKSSFD
KANRTSINSFRGPGLEGLKILQSVKNEFGMKILTDIHSTQAAPVSEVADVLQIPAF
LCRQTDLLVAAAKTKAKVNIKKGQFLNPSDIKYSVKKVLQTRGIEEEGYQVADKNGIF
VAERGASFGYGNLVDMRSLVIMREFAPVIFDATHSVQMPGAAGGSSGGKSEFVEPLA
RAAAAVGVDGFFETHNPCEALCDGPNMLDLNRLKACVKTLLEIQNIIEGK"
gene complement(118811..119743)
/locus_tag="DMACINML_01032"
CDS complement(118811..119743)
/locus_tag="DMACINML_01032"
/inference="ab initio prediction:Prodigal:2.6"
/inference="similar to AA sequence:RefSeq:CAL34535.1"
/codon_start=1
/transl_table=11
/product="putative integral membrane protein"
/protein_id="Prokka:DMACINML_01032"
/translation="MLKVIKHNLGIYFMILACLDLFALMGACAKILSKEMSSIEIMFFR
NIIGVFFIVYLLKRSKVHKEGGHFWLLVFRGVTGTLISLYMFFYNVSNITLGGAFQK
TAPIFITLIAFIIFKENIGTKGWLGIILAFSGVLLIAQPWADNSTHSGFDLKNSSIIGV
MSGFLAALALTSVRELRFYTTTEQIAFSFIFLGALMPLISMISAEFFEPKHLDALHLD
FILAPFVMPSTAWLIIAIMGALGTIYQIHVTKAYGIQAGVAVAGISYLDVVFSMIV
GIILGDDLPSAMVFLGIIGIIFGGIILVKNKGKK"
gene 119861..121243
/locus_tag="DMACINML_01033"
CDS 119861..121243
/locus_tag="DMACINML_01033"
/inference="ab initio prediction:Prodigal:2.6"
/inference="similar to AA sequence:RefSeq:CAL34536.1"
/codon_start=1
/transl_table=11
/product="putative GTP-binding protein"
/protein_id="Prokka:DMACINML_01033"
/translation="MQSIILIGKPNVKGSSLFNRMARQRIAITSEISGTTTRDNTKTEV
FINSKALLIDSGGLDESNELFKNVKNLTKIAKESDIILYLDVGKLSPPDEDRQFFH
SLKKLGKPIALVINKVDNKKDEERSWEFANFGVKEVFNLVTHNIGLDELYNWLENFL
DEEFLVPDEEENLEDFLEHYEEGKEFQFKEVDQNHIRVIGRVNVGKSSLLNALVKQ

```

```

ERSVSSIAGTTIDPVNESIVYKDKVIEFVDTAGIRKRGKIQGLERFALNRTEKILSN
SQIALLVLDANEGFNELDERIAGLAAKHYLGVIIVLNKWDKTEFEFDKVVKELKLDLF
KFLAYAPIVSVSALS GKR VHVLLEKILEVFANFTQKIPTSKLNDLIASATKAHPLPHD
YGKLVKIYYAVQYDLAPPKIALIMNRPKALHFSYKRYLQNQIRKEFNFEVPLVIASR
KKGSKENDES"
gene      121230..121727
          /gene="aroK"
          /locus_tag="DMACINML_01034"
CDS       121230..121727
          /gene="aroK"
          /locus_tag="DMACINML_01034"
          /EC_number="2.7.1.71"
          /inference="ab initio prediction:Prodigal:2.6"
          /inference="similar to AA sequence:RefSeq:CAL34537.1"
          /codon_start=1
          /transl_table=11
          /product="shikimate kinase"
          /protein_id="Prokka:DMACINML_01034"
          /translation="MMKVRNIIFIGFMGSGKSTIARALAKDLDLVFLDSDSLIEMKFD
QKVSEIFKEKGEAFFRQEEQKVANFLCSCNGASIASGGGFIVHLDLFDKIGFCVYLKAS
FEYLKKRLSENEIAKRPLFYDEVQAKRLYNERLNKYEQKANLILDVENKSIDELVIEI
KKVIK"
gene      121724..122683
          /gene="trpS"
          /locus_tag="DMACINML_01035"
CDS       121724..122683
          /gene="trpS"
          /locus_tag="DMACINML_01035"
          /EC_number="6.1.1.2"
          /inference="ab initio prediction:Prodigal:2.6"
          /inference="similar to AA sequence:RefSeq:CAL34538.1"
          /codon_start=1
          /transl_table=11
          /product="tryptophanyl-tRNA synthetase"
          /protein_id="Prokka:DMACINML_01035"
          /translation="MRVLTGLQPSGDLHIGNYFGAIKQMV EAEKSEMFMFIANYHAM
TSSQDGK KLEQNSLKAAAFLSLGIDPQKSVFWLQSDVKEVMELYWILSQFTPMGLLE
RAHSYKDKVAKGLSASHGLFSYPV LMAADILLFDTQLVPV GKDQIQHVEIARDIALKV
NNEWGEIFTLPEAKINEEVAVVGT DGAKMSKSYQNTIDIFASQKALKKQISSIVTDS
TALEDPKDYQNCNVFKIAKFLNEAEQKELQVRYEKGGEGYGHFKMYLNDLVNEYFKE
ARMKYDELLEKPSHLKEILELGASKARKIAQEKMQKIYEKIGL"
gene      122693..123928
          /gene="serS"
          /locus_tag="DMACINML_01036"
CDS       122693..123928
          /gene="serS"
          /locus_tag="DMACINML_01036"
          /EC_number="6.1.1.11"
          /inference="ab initio prediction:Prodigal:2.6"
          /inference="similar to AA sequence:RefSeq:CAL34539.1"
          /codon_start=1
          /transl_table=11
          /product="seryl-tRNA synthetase"
          /protein_id="Prokka:DMACINML_01036"

```

```

/translacion="MLDLKNLQNNFDEVAKKLQNKVDESILKNLAELFANLKKKEKAS
LEEFQAFQNKFSKELATAEDKESLKAKLSENKIKISEQNARVNALENELETIAHAIPN
IPDECVPVGEDEEENVEIKKVLTPPQFDFIPKEHDLGESLNWLDVFRGVKISQSRFC
VLKNEGALLSRALVNYMIDFNRSRGFEFVNPFLVNSATMFGTGQLPKFKDDMYKIDD
EDLYLISTSEIPVTNLYSGEILTSESLPIKMTCSACFRKEAGSAGRDRGIIRQHOF
EKVELVSITKPEQSDSVFNEMVECASDLLSSLGLAHRHMLCTGDLGFSAAKTIDLEV
WIPSQNKYREISSVSNCRDFQARRAKIRYKNEKGKNELVHTLNGSSLAVGRTLVAIME
NYQDKEGKIQIPDVLKKYF"
gene      123938..126400
          /locus_tag="DMACINML_01037"
CDS      123938..126400
          /locus_tag="DMACINML_01037"
          /inference="ab initio prediction:Prodigal:2.6"
          /inference="similar to AA sequence:RefSeq:SQE23829.1"
          /codon_start=1
          /transl_table=11
          /product="TPR domain protein"
          /protein_id="Prokka:DMACINML_01037"
          /translation="MADKEDIVLEKPEDTLNEPRLDESLGEFKGQEGQAPEDEEFTSL
PDELPRENSGSGFKFTRESAPEETSTFEEVEDEPTPWYKDRKFMSLVGLSLGIICIL
VFTLFYLTfNDGKVKPDIIATKPIEQVIMPDESVDYNDMTKVDGMIQKANALYLKGE
VEQALKVYEQIAVYNESLSNYNLGVSQMNKGFDEAFESFKRAIANGENQSVAAINAA
VCALKLNDREKFKYYIDLAQVYLPKEGKSKLYDYLLALINYYKGYYPEALQMLQRVNS
EPYADVSKYLSAKIYAKMDFDAKSVQQLNTQGSFEPSSLGLLYARMGEYDKAKIALN
TAMKIERDFNQSLSALTLVDIKTGDFQDMLLRLQSTYRNDEDKYKILDYKIKVRLNK
ELFNITIAQRNFSNDILKKQKQDFDLYFYFAPYQVFDQSKQASLYIKKANITNFVDDSS
DGQSYLATS KALSSTNVKIANIINNALNQLRLANQEFLLLEDYPEHSILQYNLALT
YAQMQNYELAYKHFSSSYHLNPKNYLAGAFAMFCGKLSNDNTTKLYHEILDNIAADS
FKANMQKNMLFLANGDYVSMLPYLDENGQKTPNLIFEAIIAKNNNLNNQVDVKIAKL
RSELPQDIVANILYFNSLNSNLNIKEYAQNQAQIHFKNLQVDYRSVFGGSNIARELYVN
LMHIAGLLNLERQKFKTLINTSKVKDEGMVQTLAYLDIFAQQYEEYALYNILIDEYG
AKDARTLFLASVAAVGANNPNSAIALLQLSKLTDKNSKESKVALGLLYQEVGNYEAAI
TQYRTLPNFAFKSEFFTFDIKNQ"
gene      complement(126429..127043)
          /locus_tag="DMACINML_01038"
CDS      complement(126429..127043)
          /locus_tag="DMACINML_01038"
          /inference="ab initio prediction:Prodigal:2.6"
          /inference="similar to AA sequence:RefSeq:CAL34541.1"
          /note="hypothetical protein Cj0391c"
          /codon_start=1
          /transl_table=11
          /product="hypothetical protein"
          /protein_id="Prokka:DMACINML_01038"
          /translation="MQINTFSNVASIAQAQVSNKKADTNTKDTNVQSANSNQDVLDKL
NALGGKGISQIYLQVQQQTMSTVLNLSNAQAGINLLGGNDLNSIKSMLSDIDFASL
GYNGKNPLAMNTDELNQLISEEGFFGIDNTANRIADRFVIKAGNDVEKLLKGLGKIKQ
GFEQAEKIWWGGELPQISQDTIEATIKKVS DRIDELGGKTLDLKA"
gene      complement(127136..128578)
          /gene="pykF"
          /locus_tag="DMACINML_01039"
CDS      complement(127136..128578)
          /gene="pykF"
          /locus_tag="DMACINML_01039"

```

```

/EC_number="2.7.1.4"
/inference="ab initio prediction:Prodigal:2.6"
/inference="similar to AA sequence:RefSeq:A0W96756.1"
/codon_start=1
/transl_table=11
/product="pyruvate kinase I"
/protein_id="Prokka:DMACINML_01039"
/translation="MLKTKIVATVGPASEKEDILRQMIINGVNVFRLNFSHGTHEYH
KNNLETIRKVSRELNTRVGILQDISGPKIRTGELKTPFELKKGDKLDFYYEKIIGEQI
TPNHYKLSINQSEILNMLKLDEYIYLYDGSIKAKVTAKDNEKIETLIENDGFLNSNKG
INFPNTKINIDVITQKDKDLLWGIENGVDLFAISFVQNAHDIDEVREILAQNNAKIS
IFAKIEKFDIVENIDEIIASSDGMVARGDLGIEVPYKVPNIQKAIHKNASKPV
ITATQMLFSLAKSKTATRAEISDVANAVLDGTDVAVMLSEESAVGIDPANAVDIMCQTI
IETEKRYPNKFNFEVNLNNTDKIMRSSAHLATDLNADAIIFSLTSSGKSAIKIARYRP
NMEIIAVAHSEKTLNLSLIVWGVNPAILVNKSEDLTDLRDSVKSSVEKGFMDKDKCY
LLTAGFPTGVEGTSNLIRILAKEQIAYYLK"
gene complement(128630..129976)
/locus_tag="DMACINML_01040"
CDS complement(128630..129976)
/locus_tag="DMACINML_01040"
/EC_number="1.1.5.4"
/inference="ab initio prediction:Prodigal:2.6"
/inference="similar to AA sequence:RefSeq:CAL34543.1"
/codon_start=1
/transl_table=11
/product="putative malate:quinone oxidoreductase"
/protein_id="Prokka:DMACINML_01040"
/translation="MTQQEFDVIVIGAGISGAALFYELARYTDIKNIALIEKYHAPAT
LNSKGTSSNSQTIHCGDIETNYTLEKAKKVKRTADMIVKYGLLQNAQNQFMFSHQKMAL
AVGDTECEYMKKRHEEFGELYPYMKFFDKEKIKQIEPKVALGENGIDDRPENICAMGV
EAGEVFTTVDFGKMSASLIEQQKQKQKNTFVAFNQEIVHIEKKDDIFILKTNTYQEYR
SKAVVVNAGAHSLYLAHKMNLGMDKSCWPVAGSFYLTQKLLNGKVYMVQNPKLPFAA
LHGDPDLLADMNTRFGPTALVIPKLERYHGLKSVPEFFEALKLDKTVLKVTFMSFKDP
TIRNYILYNYLFELPFIDKGLFVKDAKKIVPSLKTSDIYYAKGFGGVRPQVIDKTKGE
LMLGEASITETPGIIFNMTSPGATSCLGNAERDAKLMCEYLGAKFDEDKFASSELL"
gene complement(130102..130731)
/locus_tag="DMACINML_01041"
CDS complement(130102..130731)
/locus_tag="DMACINML_01041"
/inference="ab initio prediction:Prodigal:2.6"
/inference="similar to AA sequence:RefSeq:CAL34544.1"
/codon_start=1
/transl_table=11
/product="putative transcriptional activator"
/protein_id="Prokka:DMACINML_01041"
/translation="MLFCDIGNSNASFLDDNKFFTLISIEQFLEFKSEQKIFYINVNEH
IKEHLKARKNFINLEPYFVFDTIYQGLGVDRIAACYTIEDGVVVDAGSAITVDIVSNS
IHLGGFILPGIANRKYAHISPRLKHEFNTQISLDAFPQKTSALSYGVFKSIYLLI
KDAAQNKKLYFTGGDQFLANYFDYAIYDKLLIFRGMKKIIQENPNLLF"
gene complement(130718..131005)
/locus_tag="DMACINML_01042"
CDS complement(130718..131005)

```

```

/locus_tag="DMACINML_01042"
/inference="ab initio prediction:Prodigal:2.6"
/inference="similar to AA sequence:RefSeq:CAL34545.1"
/note="hypothetical protein Cj0395c"
/codon_start=1
/transl_table=11
/product="hypothetical protein"
/protein_id="Prokka:DMACINML_01042"
/translation="MNILNEAMKVLKLDLKPFDLTNLTKKKTYLCALNDENLLLIYTG
KARFINKDAVFVDNLANSFNLYKYFFTKSPLCSKAKHYLEEKGFRIHVIL"
gene complement(131002..132000)
/locus_tag="DMACINML_01043"
CDS complement(131002..132000)
/locus_tag="DMACINML_01043"
/inference="ab initio prediction:Prodigal:2.6"
/inference="similar to AA sequence:RefSeq:CAL34546.1"
/codon_start=1
/transl_table=11
/product="putative lipoprotein"
/protein_id="Prokka:DMACINML_01043"
/translation="MRQFVLISFCLIFLCACGTRQYFEPSTQDGKLSNDSLKASII
DWNTISAKLKNNQIILKNDIIIEDFKLDKGYMLLAYQEGEFIEADDNGNLKIYNSSHD
EVYSYKFDAAVLGIALHGDDLALILANNSIVLANRSLGIKFNQNLTPAPAQDSRVANP
IFLDNIIYPTLDGKIIIVSKNTFEVVKDVVISAESFFNNVIHLGISDDKMIATAKK
VIVVSPARTLYLDADIKDIAFDNNAIFILEKNGNIIKTDYNLRKITEKKFDFAIFTKV
SIHNDHLYTFEKTGYLIKCDLNFENIQIFELPNAVEKTSFMGNGKFYYGNKILDLL"
gene complement(131997..132575)
/locus_tag="DMACINML_01044"
CDS complement(131997..132575)
/locus_tag="DMACINML_01044"
/inference="ab initio prediction:Prodigal:2.6"
/inference="similar to AA sequence:RefSeq:CAL34547.1"
/note="hypothetical protein Cj0397c"
/codon_start=1
/transl_table=11
/product="hypothetical protein"
/protein_id="Prokka:DMACINML_01044"
/translation="MGLKDNLKAVKAEINTEEQFIENFIKGERFIRKYKLYIFALIAI
LIVWFAISFISGKIDQYNVEESNKIYTNLKPNPKVLLLEQLKNKNTNLYAIFLMKEL
AKDINNTEIKSQLQTLSTHSDTNHLKNIASLSLGEKSIFLKNYDKILQAYRLLGEGK
IEQANILLSQIKDDALSQIAKNLKHYQGISQ"
gene 132708..132995
/locus_tag="DMACINML_01045"
CDS 132708..132995
/locus_tag="DMACINML_01045"
/EC_number="6.3.5.-"
/inference="ab initio prediction:Prodigal:2.6"
/inference="similar to AA sequence:RefSeq:CAL34548.1"
/codon_start=1
/transl_table=11
/product="Glu-tRNAGln amidotransferase subunit C"
/protein_id="Prokka:DMACINML_01045"

```

```

/translation="MQIDEKLLSKLEKLSALQIEEEKRSEVIRELSEIVNFVEKLNEL
DLSSSEVTISTIKGGTFRSDSVNSSSVVETVLNHAPKSNDFHFIVPKIIE"
gene 133075..133635
/locus_tag="DMACINML_01046"
CDS 133075..133635
/locus_tag="DMACINML_01046"
/inference="ab initio prediction:Prodigal:2.6"
/inference="similar to AA sequence:RefSeq:ABS43586.1"
/codon_start=1
/transl_table=11
/product="cvpA family protein"
/protein_id="Prokka:DMACINML_01046"
/translation="MEFYWFDAFILGFTLLLGLKGIVNGLIKEVFGLLGIIGVYIAS
KFVSQATKFIQNTFYKIENQSLAEFAGFLATLIIVWIIICLILGNFLSKLVKLSGLGFL
DRLGGFIFGAAKVFVIFAILVFCIARFDFLNDKLNQFAQNSFTLTPLKNIGSFIMNQP
LAANGLGQIDQNLQDIRDDLSTTQGE"
gene 133639..134109
/locus_tag="DMACINML_01047"
CDS 133639..134109
/locus_tag="DMACINML_01047"
/inference="ab initio prediction:Prodigal:2.6"
/inference="similar to AA sequence:RefSeq:CAL34550.1"
/codon_start=1
/transl_table=11
/product="ferric uptake regulator"
/protein_id="Prokka:DMACINML_01047"
/translation="MLIENVEYDVLLERFKKILRQGGLKYTKQREILLKTLYHSDTHY
TPESLYMEIKQAEPDLNVGIATVYRTLNLLEEAEMVTSISFGSAGKKYELANKPHHDH
MICKNCGKIIIEFENPIIERQQALIAKEHGFKLTGHLMQLYGVCCNCCNQAQKAKVKI"
gene 134109..135617
/locus_tag="DMACINML_01048"
CDS 134109..135617
/locus_tag="DMACINML_01048"
/EC_number="6.1.1.6"
/inference="ab initio prediction:Prodigal:2.6"
/inference="similar to AA sequence:RefSeq:CAL34551.1"
/codon_start=1
/transl_table=11
/product="lysyl-tRNA synthetase"
/protein_id="Prokka:DMACINML_01048"
/translation="MFDNILEQQRIQKANEFKNVGVNYPHFLVKELSLADFKKFSY
IFDTENKRDESISSVSGRLKLLRIAGKSIFANIEDESENLIYFSKDSLGEKFNLF
KKNLEVGDIILAKGPFVTKTGEFSLHASEITLTKSIVPLPEKYHGLTDVEQRYRKR
YVDMIMNAEVRKDFLIRSKVSLIRHFFEEKGFLEVETPMHPIAGGANAKPFVTFHN
SLGVERFLRIAPELYLKRLVVGGFVAVFEINRCFRNEGMDLTHNPEFTTIEFYWAYHN
YKDLMDLTEELFALLLEKLQLGKIIIEFDGQKIDFSKPFERITYKDALKKYGALSDEII
ENKDKILEKLLKDGFEANDKLDLGHQLAELFDNYVESKLIDPTFITDFPISISPLSRR
SDKNSEIAERFELFVCGRELANGFNELNDPLDQYERFLKQIEAKNAGDEEACEMDED
VNALGYGMPPTAGQGIGIDRLVMLLTNKKIIRDVILFPAMRPLKTELKEDKE"
gene 135614..136858

```

/gene="glyA"  
 /locus\_tag="DMACINML\_01049"  
 135614..136858  
 /gene="glyA"  
 /locus\_tag="DMACINML\_01049"  
 /EC\_number="2.1.2.1"  
 /inference="ab initio prediction:Prodigal:2.6"  
 /inference="similar to AA sequence:RefSeq:CAL34552.1"  
 /codon\_start=1  
 /transl\_table=11  
 /product="serine hydroxymethyltransferase"  
 /protein\_id="Prokka:DMACINML\_01049"  
 /translation="MSLEQFDKEIFDLTNQELVRQCEGLEMIASENFTLPEVMEVMGS  
 VLTNKYAEGYPAKRYGGCEFVDEIENLAIERCKKLFNCSFANVQPNSSGSQANQGVYA  
 ALLNPGDKILGMDLSHGGHLTHGAKVSSSGKMYESFFYGVELDGRINYEKVVREIAHIV  
 KPCLIVCGASAYARIIDFSKFREIADEVGAYLFADIAHIAGLVVAGEHPSFPFAHV  
 SSTHTKTLRGRGGIIMTNDDELAKKINS AIFPGIQGGPLMHVIAAKAVGFKFNLSEE  
 WKIYAKQVRSNAQALAKVLMRKYKLVSDGTDNHLVLSMFLEREFSGKDADLALGNAG  
 ITANKNTVPGETRSPFVTSGLRGLTPALTARGFKENEIQIVANYIADILDDIQNTHLQ  
 KEIKEKLTASNFIIEKAMF"

gene 136855..137400  
 /locus\_tag="DMACINML\_01050"

CDS 136855..137400  
 /locus\_tag="DMACINML\_01050"  
 /inference="ab initio prediction:Prodigal:2.6"  
 /inference="similar to AA sequence:RefSeq:CAL34553.1"  
 /note="hypothetical protein Cj0403"  
 /codon\_start=1  
 /transl\_table=11  
 /product="hypothetical protein"  
 /protein\_id="Prokka:DMACINML\_01050"  
 /translation="MISPMDSLIIKIISDHYYIRRDKIMKKITHRGRLFDFKFERIDA  
 PLNLNIMREHAACKIVVAHDLITKDNKVENIVFDYNGFNAERFYHRAQLILREEGFIN  
 FTAYKTKTPGHLHLYIHKGHTALNEGYSLASKLSMMFASKMPVEWKVFPMSDIPREFN  
 ILILPYEVYQKERGSSWSKHM"

gene 137413..138258  
 /locus\_tag="DMACINML\_01051"

CDS 137413..138258  
 /locus\_tag="DMACINML\_01051"  
 /inference="ab initio prediction:Prodigal:2.6"  
 /inference="similar to AA sequence:RefSeq:CAL34554.1"  
 /codon\_start=1  
 /transl\_table=11  
 /product="putative transmembrane protein"  
 /protein\_id="Prokka:DMACINML\_01051"  
 /translation="MENNKNEFDDIILEKSNKSEKMKKILLRVIALVILFLVIMIVMK  
 LINSGEENAENQSILPSEPLNITQDNNADSFESMPITENTSAEDQFEALRRQIQGEQN  
 DNSSVSTSNANDNINLTVPDQEVPAEPNTTNSKVPALNTTAPKQEVKQESKPKKEE  
 VKQTVTKKPEAKQAPKQETKQESKTNANDLFKNVDAKPVHPNGLASGIYVQIFSVSNL  
 DQKSRELA AVKQKGYEYKLYKTTVGGKEITKVLIGPFKANVATELAKIRKEVAKDAF  
 SFTLK"

gene 138255..139046  
 /gene="aroE"  
 /locus\_tag="DMACINML\_01052"



CDS 138255..139046  
/gene="aroE"  
/locus\_tag="DMACINML\_01052"  
/EC\_number="1.1.1.25"  
/inference="ab initio prediction:Prodigal:2.6"  
/inference="similar to AA sequence:RefSeq:CAL34555.1"  
/codon\_start=1  
/transl\_table=11  
/product="shikimate 5-dehydrogenase"  
/protein\_id="Prokka:DMACINML\_01052"  
/translation="MKFLAVIGDPISHSKSPRIHNNAIQVLKLDGIYTRYHLQDYHQL  
RQDFFKLKLQGANITLPFKEVALEIADVKDEFARNIGSANTLCLRDKGIYAYNTDALG  
FLEAIKEFEGINKALILGAGGTALALAFALKQKGVVNVNRSEKRFKDFTLTKTSLY  
DALGDFDFDLVINSTSAGLKDDDLPCDKILLDKILSRAKFAFDVIYKETSFLKLSKE  
HNLKTKDGFDMLLWQAVFAFELFFDVKDKREKIKNAMQEALKLES"

gene complement(139122..140027)  
/locus\_tag="DMACINML\_01053"

CDS complement(139122..140027)  
/locus\_tag="DMACINML\_01053"  
/inference="ab initio prediction:Prodigal:2.6"  
/inference="similar to AA sequence:RefSeq:ADT65778.1"  
/codon\_start=1  
/transl\_table=11  
/product="lipoprotein, putative"  
/protein\_id="Prokka:DMACINML\_01053"  
/translation="MKKYFLFVIALFLAACSGASNNFVHVSMPNFKPQTPTKVEPIDS  
GVSIMLEPINIEQNNNSDYFENSVLKIRIDKEVALLKENLEEQFKTIAQLKGYKIVT  
SNPDYTLKSLVSIIEEKNIQKSNNFMMSGESIKSNLGIKFKQKIDFIDQHNPQNSTNL  
TSHTKLDLVDLNYPIKTKDGINMFKTTISTVPTQLNKGLEKPAFEIDKSFLHFYKNT  
LNTLYNNLSKATDIGKTVPSNTDSSGFNFHFDNTTIFEENLPQEQNLNNSQDISFQE  
QTSSNSNIQYENNTNKNQDGVIIIFE"

sig\_peptide complement(139968..140027)  
/locus\_tag="DMACINML\_01053"  
/inference="ab initio prediction:SignalP:4.1"  
/note="predicted cleavage at residue 20"

gene 140118..140933  
/gene="lgt"

CDS 140118..140933  
/gene="lgt"  
/locus\_tag="DMACINML\_01054"  
/EC\_number="2.4.99.-"  
/inference="ab initio prediction:Prodigal:2.6"  
/inference="similar to AA sequence:RefSeq:CAL34557.1"  
/codon\_start=1  
/transl\_table=11  
/product="prolipoprotein diacylglycerol transferase"  
/protein\_id="Prokka:DMACINML\_01054"  
/translation="MEFWQNIYSNFDVVAFSVLGFKVHWYGYMIVLALLLALLLAKFF  
VRKFKLDINEKRLDSYFIWVEIGVILGARLGILYDAHTMYIYTHPWQIFNPYANGE  
FVGIRGMSYHGAIIGFLIATFLFCKKYKENPWKFLDLVALSVPLAYVFGRIQNFNLQE  
LFGRITNVPWGIYVEGVLRHPSQLYEAFLEGVVVFIVIYLVKMKQKQFQGELILVYACV  
YSLARFVCEFYREPDFGLGFIWGMMSGQILSLLMFVAALLFYICIKFKKVNI"

gene 141001..141786

CDS  
 /gene="frdC"  
 /locus\_tag="DMACINML\_01055"  
 141001..141786  
 /gene="frdC"  
 /locus\_tag="DMACINML\_01055"  
 /inference="ab initio prediction:Prodigal:2.6"  
 /inference="similar to AA sequence:RefSeq:ADN90613.1"  
 /codon\_start=1  
 /transl\_table=11  
 /product="Fumarate reductase, cytochrome b subunit"  
 /protein\_id="Prokka:DMACINML\_01055"  
 /translation="MSELIEGYLGKSIDGKSKMPAKLDFIQSASGLFLGLFMVWHMV  
 FVSTILVSKDFFNSVVFHLELKFYNDPMMSYITSFLAACVLVVFVHALLAMRKFP  
 NFRQYQILRTHAKMNHGDTSLWLVAFTGFVMMFFLGS AHLIFVITNGDKISADMSGD  
 RVINHFMWLFYIAL LICVELHGSIGLYRLCVKWWFEAKDKDIRKSRKLLKMAKWI  
 SIFFLVLGVLSLAAFAKIGFENYQNQTTAMVKTYNGANYEYSI"

gene  
 141770..143761  
 /gene="frdA"

CDS  
 /locus\_tag="DMACINML\_01056"  
 141770..143761  
 /gene="frdA"  
 /locus\_tag="DMACINML\_01056"  
 /EC\_number="1.3.99.1"  
 /inference="ab initio prediction:Prodigal:2.6"  
 /inference="similar to AA sequence:RefSeq:CAL34559.1"  
 /codon\_start=1  
 /transl\_table=11  
 /product="fumarate reductase flavoprotein subunit"  
 /protein\_id="Prokka:DMACINML\_01056"  
 /translation="MNIQYSDALVIGGGLAGLRAAIEVAKSGQSVTLLSICPVKRS  
 SHSAAVQGGMQASLNGAKGEGDNEDLHFADTVKGS DWGCDQEVARMFAQTAPKAVRE  
 LASWGPWTRVTKGPRTVVINAQKTVEEEREAAHGLINARDFGGTKKWRTCYIADATG  
 HCMLYGVANEAIKHQVKIIDRMEAVRVIHDGKKCLGVIARDLTNGQLIAYIARGTMIAT  
 GGYGRIYKQTTNAVICEGTGAIALETGLCRLSNMEAVQFHPTPIVPSGILLTEGCRG  
 DGGILRDVDGYRFMPDYEPKKELASRDVVSRRMMEHIRKKGKGVKSPYGDHLWLDIS  
 ILGRAHVEKNLRDVQDICKTFNGIDPADEGPKGWAPVLPQHYSMGGIRTKPTGESQW  
 LDGLFACGEAACWDMHGFNRLGGNSCAETVAGMIIGDYFADYCKNNGEVIDTNVVKDF  
 LTKKEYQYLKSLVDKEGKYSVFEIKNRMKEIMWDKVAIFRTGEGLEAVDELEKLYKES  
 QNVKVHCKELDCANPELEEAYRVPRLKVALCVAYGALLRTE SRGAHYREDYPKRDDL  
 NWMKRTLTYWVEGESLPRVEYDELIMKMEMPPAFRGYGAKGNIIENPLSEKRQAEV  
 DAI REKMEAEGKNRHEIQHALMPYELQPKYKALNQRIGVDYE"

gene  
 143754..144479  
 /gene="frdB"

CDS  
 /locus\_tag="DMACINML\_01057"  
 143754..144479  
 /gene="frdB"  
 /locus\_tag="DMACINML\_01057"  
 /inference="ab initio prediction:Prodigal:2.6"  
 /inference="similar to AA sequence:RefSeq:ADN90615.1"  
 /codon\_start=1  
 /transl\_table=11  
 /product="Fumarate reductase iron-sulfur subunit"  
 /protein\_id="Prokka:DMACINML\_01057"  
 /translation="MSRKLTIKAFKYNPLSKISKPHFVTYELEETPFMTVFVCLTLIR

EKMDADLSFDFVCRAGICGSCAMMINGVPKLACKTLTKDYDPGVIELMPMPAFRHIKD  
 LSVNTGEWFEDMCKRVESWVHNEKETDISKIEERIEPEVADETFELDRICIECGICVAS  
 CATKLMRPNFIAATGLLRTARYLQDPHDHRTVEDFYELVGDDDDGVFGCMSLLACEDNC  
 PKNLPLQSKIAYMRRQLVAQRNK"  
 gene 144507..146693  
 /locus\_tag="DMACINML\_01058"  
 CDS 144507..146693  
 /locus\_tag="DMACINML\_01058"  
 /inference="ab initio prediction:Prodigal:2.6"  
 /inference="similar to AA sequence:RefSeq:CAL34561.1"  
 /codon\_start=1  
 /transl\_table=11  
 /product="putative ATP/GTP binding protein"  
 /protein\_id="Prokka:DMACINML\_01058"  
 /translation="MKELLQKLWQNELQLLDFNASFKDKNILDVAELAIILSVNKDNY  
 ERYFLLKEFGNICKKIDLRVDIFSIQKAQICVLNMFREGFIPKQDLLKALRILQKISN  
 NTEILEYIQNIQVQSVDKKALFQSGFNELNHINIELSKLSFDENSKIRLQKTLEKFQK  
 LEFNIAITGVMNSGKSSLLNALLKEDFLGVSNIPEANLTLSSYGNTQEAVIYFWDTQ  
 EWDNILKSSKFSKELKEFIDELALKVDIKEYVQDKALTQKINLNELKDFSSAKNQISA  
 LIKKIEIKSNLEFLKNNISIVDTPGLDDIVVQREILTNEYLKESDFLIHLMNASQALT  
 QKDAEFLIHCLLNSRLSKFLIVLTKADLLSQKDLDEVINYTKESLKRLENFDTHLIE  
 KIDFLCVSAKMASDFYKGLSSEESFKKSGMKEFEYLFNELYSGEKSKIILQAYKKE  
 LLELKNILNEYEMQNKLKEDGQGLSEENKLLSEFKAKEEALREAKEEISNSILNLE  
 NFENGVDNLVLLAKKLERLIDEIKYLKDKAQKININRILNMIDITVKDGINLIRE  
 VKFENIKKIEELKTSALKYDFLKDDFDNGFEGFKDEISKKIENIFSDEKFAALLRQI  
 EQIISTKADLFELETRLTEVIFSTFESFNIGAILKDLINGAFFAFLNERMANYEVLQ  
 KEKLASIEHLINNLKNQNADILFSYEENLEKIAKLQQLLEVELMNA"  
 gene 146683..148515  
 /locus\_tag="DMACINML\_01059"  
 CDS 146683..148515  
 /locus\_tag="DMACINML\_01059"  
 /inference="ab initio prediction:Prodigal:2.6"  
 /inference="similar to AA sequence:RefSeq:CAL34562.1"  
 /codon\_start=1  
 /transl\_table=11  
 /product="putative ATP/GTP binding protein"  
 /protein\_id="Prokka:DMACINML\_01059"  
 /translation="MQINILNHFYKAYEDAYNIDFKSFEGQIKMLCKKLNPFMHP  
 YNLTQELEELSFSLKKNINIAIIGQFSSGKSTLLNLILKKECLPTGVVPTFKPTFLR  
 YADEYFLRVFQDGSDEITHIEELAKYTDQRNNIKETKSLHIFAPIPLKKITLVDT  
 GLNANEDDTLTTKELQNIHAAIWLSLIDNAGKKSEEDAIKANLELLGENSICVLNQK  
 DKLSTQELENVLSYAKTVFSKYFKELIAISCKEAKDETKYKESNLLDFLDSLDEK  
 ALKQKFTKRKMLHLCQVLEDENRLFVDIFDKLVNQFQIYQEKLNSSFDDFIKEVQILN  
 HQILNKLKSIGERIASEIFNCIKEKEAHFYKEAKGFLKDKLYVKYDYKAPFISSDDAF  
 LAMFYNSDIMNKEFKKIKNEIYESFEKIKQKLKDFIDNLEKDILLFKAEFNSIQKDHI  
 LQSDKNFSELRAFCNASDEYFLKDFKELLFKSILELDFFEKLNKAFANYENATKLS  
 LAFFSRKINESRVLYELDSSEFTLFYPKKSEIYERVLTELNVYEFALLINKPILVKI  
 SNHFLEQNKNIIEEKNKILALKKAELQKRKEQISEVRSVLKENL"  
 gene 148512..149216  
 /locus\_tag="DMACINML\_01060"  
 CDS 148512..149216  
 /locus\_tag="DMACINML\_01060"  
 /inference="ab initio prediction:Prodigal:2.6"  
 /inference="similar to AA sequence:RefSeq:CAL34563.1"

```

/codon_start=1
/transl_table=11
/product="putative periplasmic protein"
/protein_id="Prokka:DMACINML_01060"
/translation="MRIFFILSLFFHTLFAVDDLDNALRLYEGNKFVKAYEIFERLCE
KDNAKACFSLAYMENAQGVARDFNKAYKFYDKSCKLGLAKACSNMALTQDRGYVNE
SLLAFNKACNLGDSSSCNHMGLVYEDEKDGQMATHFYKRSCDLKDARACYKLGFLYER
GELVRQNLKSALAFYKSCITLGFGEACYLIGRYYELEKKDLKKAKRYLGMACDKKHQE
ACAAAYRKLNSQDIEIY"
gene complement(149239..149916)
/locus_tag="DMACINML_01061"
CDS complement(149239..149916)
/locus_tag="DMACINML_01061"
/inference="ab initio prediction:Prodigal:2.6"
/inference="similar to AA sequence:RefSeq:EAQ73297.1"
/note="conserved domain protein"
/codon_start=1
/transl_table=11
/product="hypothetical protein"
/protein_id="Prokka:DMACINML_01061"
/translation="MQINLNYNYISSSSFDNTQKNNTAQENTENTNSQNKDPKQNNQ
TQMINGVELTMQQVQQVRELQSIDRNVKAHEAAHQAGGGLAGAASFYTRGPDNQMY
ATAGEVPIRMQKGRTPREETIANARQVVAAMAPADPSPQDYRVAANALKMEFEARAE
TKLKAQEAQEKKKEENEENEENLDTNNQDSKDSSEKAKTNKDFRNFIGTIYQQNSQNNQ
INFSLVS"
gene 150025..150387
/locus_tag="DMACINML_01062"
CDS 150025..150387
/locus_tag="DMACINML_01062"
/inference="ab initio prediction:Prodigal:2.6"
/inference="similar to AA sequence:RefSeq:ABS44301.1"
/codon_start=1
/transl_table=11
/product="HIT family protein"
/protein_id="Prokka:DMACINML_01062"
/translation="MIYENKWIYIEKEESQVPWIKIFTKQIYKEFSDCPYELQKEIFD
KILRCEKAMIEFYKPEKINIASFANYVPRVHFHVMARFKEDAFFPECMWGKQQRELRD
LNLPSFDEFVIFLKNKMD"
gene 150463..151035
/locus_tag="DMACINML_01063"
CDS 150463..151035
/locus_tag="DMACINML_01063"
/inference="ab initio prediction:Prodigal:2.6"
/inference="similar to AA sequence:RefSeq:CAL34570.1"
/codon_start=1
/transl_table=11
/product="putative periplasmic protein"
/protein_id="Prokka:DMACINML_01063"
/translation="MKKILLSSLVAASLLSAGLFAKEFTLDKTHTDVGFKIKHLQISN
VKGNFQDYDAVIDFDPASFEFKLEATVKVASVNTDNQTRDNHLQQDDFFKAKQFPNM
TFVMKKYKIDNEKGKMTGTLTIAGVSKEVVLDTTEIGGTAKGKDGKEKVGFSLNGKIK
RSDFNFAPGTSTITLGDVHNLNIEVEANEK"
sig_peptide 150463..150528
/locus_tag="DMACINML_01063"

```

```

/inference="ab initio prediction:SignalP:4.1"
/note="predicted cleavage at residue 22"
gene complement(151046..151996)
/locus_tag="DMACINML_01064"
CDS complement(151046..151996)
/locus_tag="DMACINML_01064"
/inference="ab initio prediction:Prodigal:2.6"
/inference="similar to AA sequence:RefSeq:CAL34571.1"
/codon_start=1
/transl_table=11
/product="putative integral membrane protein"
/protein_id="Prokka:DMACINML_01064"
/translation="MFLQSLISIFSEFLALALAFYFKNTRIFLTLALFIFHLPY
LYTSTFQAHLFVSLFPLVFIILLSVKQMGKLIIEQKNLSSAILLIFIILLSFFLPRNT
GFSAANLNFHFLNLSFFRPLSELSFLFFMFISLILIIKAFKSKENYFLAFLGANFQF
LFESFWGFAYFEFASLVFCFYLIYQAYKIAFFDTLTKLPNEKNLNRFIKGNSTIAL
LHFSEFKDTQEIYIKLILKQIAKILKRFKAKIFIVENDFVLIFDDKDTALKHLAFLES
TLKNTLKLENEIFKPEFKLVWKEKEGNLNQNLQSLRVKL"
gene complement(152122..152370)
/locus_tag="DMACINML_01065"
CDS complement(152122..152370)
/locus_tag="DMACINML_01065"
/inference="ab initio prediction:Prodigal:2.6"
/inference="similar to AA sequence:RefSeq:CAL34572.1"
/codon_start=1
/transl_table=11
/product="putative H-T-H containing protein"
/protein_id="Prokka:DMACINML_01065"
/translation="MTRDMAAFLGVDVQTLRNWKKTRPNLYRVILQGLAIDEAINES
YENFHKLAKFSENAEKKVLKSDLNVIDLYAKFKKTQME"
gene 152543..152755
/locus_tag="DMACINML_01066"
CDS 152543..152755
/locus_tag="DMACINML_01066"
/inference="ab initio prediction:Prodigal:2.6"
/inference="similar to AA sequence:RefSeq:CAL34573.1"
/codon_start=1
/transl_table=11
/product="putative integral membrane protein"
/protein_id="Prokka:DMACINML_01066"
/translation="MEGVSGGSIFVTMLLFVLYMLPAIIGLSRKHSNWLIIISLLNLF
GWFIVWLIVCLISFTGSFKQTIIIK"
gene 152779..153414
/locus_tag="DMACINML_01067"
CDS 152779..153414
/locus_tag="DMACINML_01067"
/inference="ab initio prediction:Prodigal:2.6"
/inference="similar to AA sequence:RefSeq:CAL34574.1"
/codon_start=1
/transl_table=11
/product="putative acidic periplasmic protein"
/protein_id="Prokka:DMACINML_01067"
/translation="MTKFLSVCGLIVVLLNGCGGDFPGQPSDVVKVQONKYSTTGNLK
EEIPYNKESRIHGIRTFYDNGQLRTEENYKNGKRDGVSREYSKDGQLLEEMNFKDNR

```

GYGDYVGYEYENGNIRAKGKLLGFDEDEGMQEFEGNYKEYYENGLALEYFNFNQKMDG  
 LQKSYNQNGSLESEESYKNGIKNGIFRYYKNGEIIKEEFTNGILIPKSKS"  
 gene 153425..153841  
       /locus\_tag="DMACINML\_01068"  
 CDS 153425..153841  
       /locus\_tag="DMACINML\_01068"  
       /inference="ab initio prediction:Prodigal:2.6"  
       /inference="similar to AA sequence:RefSeq:CAL34575.1"  
       /codon\_start=1  
       /transl\_table=11  
       /product="putative periplasmic protein"  
       /protein\_id="Prokka:DMACINML\_01068"  
       /translation="MFKKVILFLFIGFIYQLANPLEQCDNAKIISLKKQIPIEIFKN  
 MYELSGFKAQGIDYESYEKSMKEMAKHYGKTNYTDMIEINSISNVLNSDCMVMVNA  
 ILKGENRKGLWSVTYKVFSAKVKISELAYVNGDFK"  
 gene 153967..155544  
       /locus\_tag="DMACINML\_01069"  
 CDS 153967..155544  
       /locus\_tag="DMACINML\_01069"  
       /inference="ab initio prediction:Prodigal:2.6"  
       /inference="similar to AA sequence:RefSeq:CAL34576.1"  
       /codon\_start=1  
       /transl\_table=11  
       /product="putative ABC transporter ATP-binding protein"  
       /protein\_id="Prokka:DMACINML\_01069"  
       /translation="MVEVKNLTMRFANQLLFENVNLKLVRGQRYGLIGANGAGKSTFL  
 KILSGEIESSSGEVVDFEGLRIAFLGQDQFAFENYTIKDAVMCANKRLYDALKEKEKL  
 YMSEEFTEINERLSELEMITAEEDPNYDCETRCEKILSSLKIKDFDALMSTLQSADK  
 FKVLLAQVFLGADVFLDEPTNNDLEAISWLENELLRHEGTLVVISHDRHFLNKIC  
 TRILDVDFKQIRDFAGNYDDWYMASTLLAKQAEKRDKTLKERELENFIRRFSANAS  
 KAKQATSRKALEKLELEEIKISSRRDPSIVFRTNREIGNEVLELKGISKAYDKELFS  
 NLELKIEKNDKIALIGANGVGKSTLAKIIANAIAPDSGSMHLGATIELGYFPQDTSNL  
 ICENLKLWELMSEKFKDLDEIRKCLGRMLFSGSDQEKMAASLSGGEKHLMLSRMLL  
 ERPNFLLLDEPDNHLDESIIALGEALYNFKGVALCISHDRELVSANRIWHLKDGE  
 LTDFRGTYQEFLGENDG"  
 gene 155537..155869  
       /locus\_tag="DMACINML\_01070"  
 CDS 155537..155869  
       /locus\_tag="DMACINML\_01070"  
       /inference="ab initio prediction:Prodigal:2.6"  
       /inference="similar to AA sequence:RefSeq:CAL34577.1"  
       /note="hypothetical protein Cj0427"  
       /codon\_start=1  
       /transl\_table=11  
       /product="hypothetical protein"  
       /protein\_id="Prokka:DMACINML\_01070"  
       /translation="MAKFRIQYSAGFGHFTQNHKGFPTIYIEEVVEFDNGKDYFDYI  
 DFYNTYSKSDDTYFHISFLEDRPLSDKEITIRNEYRKIRDENCKRAKEEFIRDNELDV  
 EHLPTHGD"  
 gene 155920..156297  
       /locus\_tag="DMACINML\_01071"  
 CDS 155920..156297  
       /locus\_tag="DMACINML\_01071"  
       /inference="ab initio prediction:Prodigal:2.6"

```

/inference="similar to AA sequence:RefSeq:CAL34578.1"
/note="hypothetical protein Cj0428"
/codon_start=1
/transl_table=11
/product="hypothetical protein"
/protein_id="Prokka:DMACINML_01071"
/translation="MQVSYKTISSYEYDAISGQYKQVDKQVEDYSSTSDSDFMDILSK
LEENSGTSSSTEENLQNTQSSNSNSSQYQMSSMYAYRFRQNEGELSLSKAQSASVHND
LLNQNANGQNKDSSLLGDLLNAI"
gene complement(156329..156913)
/locus_tag="DMACINML_01072"
CDS complement(156329..156913)
/locus_tag="DMACINML_01072"
/inference="ab initio prediction:Prodigal:2.6"
/inference="similar to AA sequence:RefSeq:CAL34579.1"
/note="conserved hypothetical protein Cj0429c"
/codon_start=1
/transl_table=11
/product="hypothetical protein"
/protein_id="Prokka:DMACINML_01072"
/translation="MQTIDQIFQAQIEIKKSTFLSYLCPFKDFKNLLVNLKKEHPKAV
HFVYAYRTLNEYNQIIEDKSDDGEPKGTSGIPSLNVLRGYELINTAVITVRYFGGTKL
GTGGLVRAYSDAANAANINNASLLTFEFKKNIKIAIDFKNLNRFEFHLRTHSLEFERDF
KNEKVILNLLNLEEEEQKFEIFCTKFTPFEIEKL"
gene 157016..157663
/locus_tag="DMACINML_01073"
/locus_tag="DMACINML_01073"
/locus_tag="DMACINML_01073"
/locus_tag="DMACINML_01073"
CDS 157016..157663
/locus_tag="DMACINML_01073"
/locus_tag="DMACINML_01073"
/locus_tag="DMACINML_01073"
/locus_tag="DMACINML_01073"
/inference="ab initio prediction:Prodigal:2.6"
/inference="similar to AA sequence:UniProtKB:P0ACL5"
/codon_start=1
/transl_table=11
/product="Glc operon transcriptional activator"
/protein_id="Prokka:DMACINML_01073"
/translation="MSKTSQKNSSYKIYEFIIIESIKEGSLKPNDRIKEQDIVQQTGFS
RTPIREALGILLQNDGILVQDSKKGLVWAGLDLISITKLYEIRELLEGEAAKLAAQYAS
SSEIEILENIVQAQKNITELNELKSNVLFHQTLYRCSGNHYLYKIMENLDRSLLLLG
DSTLAKENRAKEAYKEHLAVVEAIRNRDIAKAEEMAKFHIRQAYKVRLSNILNQS"
gene 157892..159184
/locus_tag="DMACINML_01074"
/locus_tag="DMACINML_01074"
/locus_tag="DMACINML_01074"
/locus_tag="DMACINML_01074"
CDS 157892..159184
/locus_tag="DMACINML_01074"
/locus_tag="DMACINML_01074"
/locus_tag="DMACINML_01074"
/locus_tag="DMACINML_01074"
/inference="ab initio prediction:Prodigal:2.6"
/inference="similar to AA sequence:RefSeq:CAL35716.1"
/codon_start=1
/transl_table=11
/product="alpha-ketoglutarate permease"
/protein_id="Prokka:DMACINML_01074"
/translation="MATRSKSDAKTIFSVASGNFLEMYDFAVYGFYAAFIKVFPPAE
NEFISLMQSFMAFGVGFMRPIGAIVLGSYMDKYGRKKGLVLT LGIMALGTLSIACCP

```

SYESIGILAPIIIVIGRLLQGFSAGAEVGGASIYLAETIAPKHLRGFYVSWQSGSQQVA  
 TVFAGALGVLLHLYLVDALMQAWGWRIPFIIGCLVVPYIFYIRRTLDETPEFKAKIHQ  
 APKTLGAIHQSIHQNIPIVFFGIMFVMMTTVTFYFITAYTPTFANKELHFSKLESFAI  
 TTIIGVSNFVWLPFSGYIGDRIGRKPILLTVTFLGVISAYPMLNFLTNNISFTNLVIV  
 ELWFSFIFGAYNGAMVVSLSEIMPKNVKALGFSFSYSIAVAIFGGFTPAISTYLIEKT  
 DNPASPAFWLTFAALCSLIASLVIFKKGGIYERQQKGE"

gene 159159..160583  
 /gene="ifcA"  
 /locus\_tag="DMACINML\_01075"

CDS 159159..160583  
 /gene="ifcA"  
 /locus\_tag="DMACINML\_01075"  
 /EC\_number="1.3.5.4"  
 /inference="ab initio prediction:Prodigal:2.6"  
 /inference="similar to AA sequence:UniProtKB:Q9Z4P0"  
 /codon\_start=1  
 /transl\_table=11  
 /product="Fumarate reductase flavoprotein subunit"  
 /protein\_id="Prokka:DMACINML\_01075"  
 /translation="MKDSKKESEMEFDIVVIGGGNAALCAAISAASKGNVKIALLESS  
 PKEWRGGNSQHTRNLRSMHDAPTDVLVESYSEDEFEDVFKVTKGQTNEEYARFVISH  
 TPQAVEFAKKYGVRFQPSMRGTLHLGRTNAFFLGGGKSLVNAYFNTAQNLGVEIFYEF  
 EALDLVIDEGWCKEILVLDKKQNKELKFKAKAVIVASGGFESNLEWLEEAWGEKARNF  
 IIRGTRFNQ GKMLRALQKNHAQIIIGDPTQGHMVAIDARTPKYDGGIASRVDCVSLGIV  
 VNKKAQRFYDEGEDFWPKRYAIWGRLVANEEDQIAYSITDSKVQKCYMPSLFEPIVAN  
 SIEDLAIKINLDPKALKATLDEYNQSVVEGEFNHTIQDNCYTQGLKIEKTHWALKINT  
 PPFYCYPLRPGVTFTYMGVKVDKNARVYQDDGELFKNVFAAGEIMAGNILTQGYVAGF  
 GMSIGSVFGRLAGENAYDLIKEVK"

gene 160580..161647  
 /locus\_tag="DMACINML\_01076"

CDS 160580..161647  
 /locus\_tag="DMACINML\_01076"  
 /inference="ab initio prediction:Prodigal:2.6"  
 /codon\_start=1  
 /transl\_table=11  
 /product="hypothetical protein"  
 /protein\_id="Prokka:DMACINML\_01076"  
 /translation="MKITKIYEDANKSCIIICNSCRYCEGLCAVFPAMEKKREFSLTDM  
 DYLANLCHQCSECFYDCQYAPPHEFNVSIPKQFAALRQYSYEKYSFPNFLGSAFRKNA  
 VLTITIVLILCLFFGFWSASSYDGESTNGNFFAVVSYEYMVSFVSIIVSLVLCIALFGGI  
 IKFYRAIEIKNVNFKVFVQSIKDAMTLKYLGGHKNEGCTYPNEKRSNIRKIFHHFTAY  
 GFLFCFIATCLGAIYHHFLNLVAPYDITQLPKIFGILGGIMLCIGSLGLFVLKCIADK  
 NIIDEQSVSMDYTFIFMLFLVSFTGILLMFLKHSFFLSYALWHLSCVLAFFIMPYS  
 KFIHMFYRFIALLLKYNSEEEI"

gene 161772..162995  
 /locus\_tag="DMACINML\_01077"

CDS 161772..162995  
 /locus\_tag="DMACINML\_01077"  
 /inference="ab initio prediction:Prodigal:2.6"  
 /inference="similar to AA sequence:RefSeq:A0H51466.1"  
 /codon\_start=1  
 /transl\_table=11  
 /product="putative protein, PMT family"  
 /protein\_id="Prokka:DMACINML\_01077"



```

/translacion="MEKIKNYKLIIILLAFDILLALLYGISTLSISTDEAKIYFEDKGN
FLFLNHSLLYLTHFGTFVFGQNDGFLRIPILFFHFLSCILLYILALKYTKTHFDSL
ALLLFVLLPGTVASALLVNEASIVIFLTLAIICAYEYKWKWIFYPLLILALFIDKSFN
ILFLTFFFYGIYKRNSFLTLALVLFGLSISFYGFDTGGRPRGYFLDTLGFIAACFSP
LVFIYFFVYVYRLTFKEQKSLWFLMSVTFIFCSLLSLRQKLYLEDLFPFCVICTPLL
IKTLMASYRVRLPQFRLRYKIFIECSIIIFLLFCYFVIIGNQILYFVSDPKYNFANNY
HLAKELSKELKKQEIFELRVGTSLQPRLRFYGIKDSNTFYLKSINKKEQFDKNKKNII
IKLGKFEKIYQIQRY"
gene      162964..163731
          /locus_tag="DMACINML_01078"
CDS       162964..163731
          /locus_tag="DMACINML_01078"
          /inference="ab initio prediction:Prodigal:2.6"
          /inference="similar to AA sequence:RefSeq:ABS43574.1"
          /note="conserved hypothetical protein"
          /codon_start=1
          /transl_table=11
          /product="hypothetical protein"
          /protein_id="Prokka:DMACINML_01078"
          /translation="MKKFIKFKDTSDAFTLFELVLVVLILALVISIAQINLKQDRMLQ
GAKQILNDIRYVRSIAMIQESFRDLELAVAKREWHKSRWQLYFINSAAATNYEQTYTIF
LDKNGDGNANLGKTEINIDREIAVDIINPKKLMNSGQSGVIDKSDNKTTRFRNIFKFF
GIKKVEFRGSCRGSTKIIFDEKGRLYSPLRTSQGIYDKNLAKTNQDCIIRLSSIQANQ
ICIIVNPLSGFAYIPKFQDFNKMIMINGTISQCSKI"
gene      163800..165437
          /locus_tag="DMACINML_01079"
CDS       163800..165437
          /locus_tag="DMACINML_01079"
          /inference="ab initio prediction:Prodigal:2.6"
          /inference="similar to AA sequence:RefSeq:CAL35227.1"
          /codon_start=1
          /transl_table=11
          /product="putative MCP-type signal transduction protein"
          /protein_id="Prokka:DMACINML_01079"
          /translation="MNRLGISARLYLSFALIIIFIMLFIAIFSIKVNFLDKTLTTATG
ENALISRQAINFRGSIHDRSILIRDVLAQDQEDLRKTLAQIQKLEKDYEEAELILND
IIAKGGGDSNVRSMMEDIAKTKKNTVQIYQKIIDTVVKKNDIQSATKMLVDFARPEFI
LWLAQTNKLDYQELDNQELTQIALLESKSFQFIMMSIIIIALIIISIIIIAYLIVRYIK
KSVGGEPRDVRNRIITEVANGNLTQQIHTEYKQSILYSISRMQDQLRNIVQKMITISNE
LNHKADLVDRISKTEKAVIFQGETSRESALKIREISQKTQNVSKMALETEENSKNTT
QVCQNNKKAEDTASQMEYIASNSSRVSQQIALLSEHAKNIGTSTELISEITDQTNLL
ALNAAIEAARAGDVGRGFVAVADEIRKLAEKTGGATDQIAMINKQIQEETIATVGVIE
ESIPLISQGKSLSEEVDRSDVLDIYKQANDSLFKAQEVNQEVAAQVKLMEEIEEKIITV
ADISSKTQQAQVSENKNAMKELKNISDNLQAEITIFKL"

```

ORIGIN

```

1  aggattagct gtaattcttg cagtaagatt accactttct actactccta cggtttcaac
61  actttctttt actgcttttag catcttggtc taaaccttgt ttagtagcaa ggatgttttc
121 gttgatgatt ttaccattt ttcctagttc atcatcgcc ctaattttga ttgtgtgaac
181 ttcgactttt tcatgattta agaagcggaa gaaattttct agagctttga gtataatagg
241 aattcttgct cctactattt ttcttacaca aaaatataca actactaaaa tagcaatcaa
301 agctatagcg gcaacaccaa cgataataaa ttctaattta tataaagggtg ctaaaactga
361 tttcttaggc gctgttaca ctacgctcca tttgcttgaa ttatttaaag tattaatgg
421 agtgatactt gcgtaactag gttgccccat tgaatcggtg taattatcaa tgatgatttg
481 tctatgttct ttcactgcat cattgattaa atttatagaa ggatctttat tgatatcaat

```

541 caaatTTTTT aaaatagctc ctgggttggt attgtgaacc gcaataacc cttgatcatt  
601 tgtgatcatt cttatattac cttcaaaaag gtctaaagat ggatcaagta aagctttaga  
661 aatttcatta aaatccaaag aatatacctat agctcctaca agcttacctt tattgttgaa  
721 aataggcatt cccagattga tacccaaaaa ctcatttcca ttataattaa ggtgcgtagg  
781 aggacaaaaa aatactgaat catgatcccc gtatttcgca ttttgttcta tttctcgaat  
841 tatatttagt tgcgcgaaat tatttggagt acggataact tttataacct ctgatctttc  
901 taaagtggta tcagaaaaaa tcatagcaaa ggtgttgcca tcttggcttc taaaatTTTT  
961 atctatagca gcagtattgc ttaataccga aggatctttt agataaagaa aagcatattc  
1021 tgctcttgca ctactatcaa aagtattttt tacaatactt tcaaccaaat ttacatcaat  
1081 ttgatcatat tgtgaaaata tttcattcaa tgaagaagcg gtactttttg ttaagacaat  
1141 gggttcattt aaaatacctt ccatgtagtt tacatatctt tttgaagata tgaatagtgc  
1201 atttttggct tctctttctg caaaggaagc aacttctgag gatacaatag atattaaaac  
1261 cactatagct acaattacac tgatggcaac tgatagtacg agttttgaac ctatattcaa  
1321 agatttaaac attgaataaa ctcccattaa ttattttttg aaaattatca gattttaaca  
1381 atatatcaaa aattttttaa aattaagttg aaatttgtcc taaaaagttt aacggattat  
1441 agtatattga tatttttaag aatatttaat atttgccata gttttgttaa atgcatttta  
1501 aagtgtggta aaattcggga ttttcaaaac ttggcggaaa aggagcttca gctctaaaag  
1561 ttttatatgt attgcctgga aggggtgtcta tgatttctat agtataagaa acgcttgtat  
1621 tttgcatttt ggcattacgt acatttttat catcaaaaat ttctcctcca acctgttttt  
1681 tgtttaatat gcttaacatt aaatagcatt tgcgaatatt aaatttagta agattttgca  
1741 cttttcctgt gataataatg ctttcgtgtc ttaaatctct agaaaaggta agtttgctaa  
1801 gactagcttg gattgtaaat tgattaatag ttagaaatac agaatagatt aaaagagcag  
1861 tgaaaatagt tgcaatagta taggaaatta aagcaaattc tttttgttta accttaaga  
1921 aaattaaaaa acaaatataa ataaagcaaa aaattaaaaa acaaaaagct aaaatatgaa  
1981 aaattgtaa ttgcatcaaa agcactccga atttaggcgt atagtgtagt tattatcgta  
2041 gttaaaattg tcaaaagcaa ttctttgaaa ttgagttgtg ttttgtttta gattaaaaat  
2101 ctctctactt ttttgcctaa aaggaataaa tttgttttta tatgtattta tgagattatc  
2161 ttgaggtagc ttatctttga aaatttttagc tattatttta cattgtttta agtcgttttt  
2221 agaagtattt gtgatattaa aatcaacaat caaagctcct gaactttgta tgaatttttg  
2281 ttctacaatg gttgtttttc tactccttgc ttggctgtct atgagtttat acccatatgt  
2341 ataaactaaa aaacaaatga ttatattaag cgcgataatc aaaagagccg ccacgggttt  
2401 gtggcgtaaa aagatacaca agagtagaac acaagtgaag agaaaaaga caaataaaat  
2461 cagcatataa tccaccaaat acaagtgagt agtgtaaaaa tgcacaattt cttttagtct  
2521 ttccactcta tacaccctag ttcatattag cagaactttg ttttttagca tccttagtat  
2581 ctacccaaat atttggtact gctccaccag gagttaagaa aatttttagca tcttgattga  
2641 ctttcaaggc ttcattaaat tctttttggg tttcgatttg ctttaagtta agcaaaggag  
2701 tatttaaact atttgcaatt tctttattag aataagcttg cgcactctgct tctattttta  
2761 cagccattgc tttaccttta gcaactgatga tggctgcatt tgcttcccct tcagctaaag  
2821 cagccttttt taaagcttct tggtttgctc tttctacttc atattttgtt ctttctgctt  
2881 ctgtttttgc aatctgtacg cgttcgattt gctcttttac ttttaaaggt aagataatth  
2941 ctctaagttg aaccgcacga agttctacag gctcattagg ttgtgcttct atggtttttc  
3001 ttatacctt ttcaatttga gttgcaattg cattacgatt tgttggagc tcttcagcag  
3061 tatatttccc cacaacactt cgaaccacat cgcgcaccac aggatctata attttgtttt  
3121 cccaatttaa gctccaagtt gctatggttt gaggaacttg taaaggattt aggcgggtatt  
3181 gaactgttac atcgatagaa acaggcaagc cacgtgaatc aagcacagaa atgctgtttt  
3241 tattgattac gcctgagcct gaagataaat tttcattact cccttctata gaagcataat  
3301 tgatttgtct tactctagta tcaattatgg ttattttttg tataaaaggt agaaaaaggt  
3361 ggagtcctgg ttctaaagga tttggatcat atttacctgt agtggattta atccccattt  
3421 cccagaatt tattaccata aaaggttttg cgataattaa aaacaaaaca ataataattg  
3481 cacatagac aaaaggagaa aattttccaa aacccttgaa attgaattca ggggctttta  
3541 aattgaaatt ttgtcgattg ttattgttat tagagtttcc atttttttta ttgaaataat  
3601 cattcaaatc agctggcatt tatttccttt atctttaaat ataagtttagc atagatgcgt  
3661 atttttcatt gcgtccataa actacatcaa aataagcatc ttgaagtttt ttagtaatag  
3721 gacctttat accactacct ataattcttg catcaacatt ataatagggt gtgatttctg

3781 cagcagttcc agtaaaaaat gcttcatcag cagtataaac ttcattctctt gaaattcttt  
3841 gacgaagtac agttaagcca agatcgtgag cgattttaag cactgtatct tgagtgatgc  
3901 tttttaggga aaagtcatta ggaggagtga ttaaaactcc atcttttacg ataaagaagc  
3961 actctcctgt gccttctgca ataaaacctt cttcatcaag catcaaagct tcttcatatc  
4021 ctgcttcaat agcttcaaat tttgcaatth gagaattaag atagtttgca ctcgcttttg  
4081 ctttgcccat gcaagattht acactatthc ttacaaaaga tgaaatthtt actttaatac  
4141 ctttttctaa accttcttca cccaaataag cacccttctt ccaagcagcg ataccaacac  
4201 gcacaggagc ttttacatga taaagtccca ttactccatc acctaagaaa atcacagggc  
4261 gaatatagac attatthttta aaatcattca cttttaaaag ttcaatthgt gccttttcaa  
4321 gctctthttg agaaaaaggg cagtttaaaa gagtaattht agcggattct aaaagtcttt  
4381 tagtgtgatc ttcaagtctg aaaatcgcca aacctthtct tgttttataa gctcttgttc  
4441 cttcaaaaac agcattacca taatgtaaaag aatgggttaa aaagtgcaaa gttgcatctt  
4501 taaaatcaac taatthttcca tccatccaaa ttttgctctg cgagatcatt tttagcctta  
4561 atagttatat ttttgthtaa aaactthttaa ttttatcaaa agtaaatthaa tgatagcttg  
4621 atataaaaag tataaatthta aacatthtaat gaaggattht aataaaaaat aaaaacttht  
4681 taaaatthtat caaacttcta tcttaaaaaat atagttthtt ttagcttggtg ttttggtaaa  
4741 gctthttttg ataattthaaa gtaaaatthaa gaaatthtaat gtcgaaatth tgagaaagat  
4801 tgaattgaaa atthttttaca gaatthtagtg taaatthtaaa aatthtattg ttaaagtttg  
4861 aaataattat aaaaatthaaa taaggagaaa aaatgccaat tgtaaatatt aaattagcaa  
4921 aaccggcttt aagtaaggag caaaaagctg aattgatagc cgatataacc gagctthttaa  
4981 gtacaaaata caataaaagc aaagaaagag tagtagtgat gctagaagat atcgagagtt  
5041 acgatatagg ttttggcgga gagagtgtag aggctatcaa ggcaaaggca agtaaatgag  
5101 tattthtaaaa gagggagatg aggcaccaca atthtgactt tcaaatcaag atggagtgaa  
5161 aattgctctt aaagatthtt ttggtaaaaa agtgatthtt tathtttctc ctaaggataa  
5221 tactccaggt tgcaccacag aagcttggtg ttttagtgca aactatgata aatthttgtg  
5281 taaaatgca gtgattatcg gtgtaagtcc tgatgggtg gcaagtcatg ataaatthtat  
5341 tgccaaatth aatthtaaagc atatthttatt aagcgatagt gaaaaagaag tggcaaaagc  
5401 ttatggagct tggggactta agaaaaatta tggcaaagaa tacgaaggca ttataagatc  
5461 gactthttgtt atcgatgaag cgggaaaaat cgcccaaatt tatagcagtg tccgcgtaaa  
5521 agatcatgca ctaaaagtgc ttgaaagtct ttaatgttag tacacatttg ttgcagtgta  
5581 gatagccatt atthttataga agagctttaga aaagaatacc ctaaagaaaa aattataggg  
5641 tathttttatg atcctaatat ccatcctthta agcgaatacg agctaagatt tttggatgta  
5701 aaaagatctt gtgataagct tggatthaaa ctttataaag gtgagtatga gtatgaaaaa  
5761 tggctaaaag ctgtaaaggg ttacgaagat gaaccagaaa aaggtgcaag atgtgaaatt  
5821 tgctttgatt taagaatggg ttcaagtgta gaatthtgcag ctaaaatagg agaaaaaaag  
5881 cttacaacia cactthttaa aagtcctaag aaggatthtag aacaatthaaa aaatgctthg  
5941 caaaaagagt gtgagcctta cggagtagaa tttttagctc ctgattthtcg taaaatgga  
6001 ggactcaaaa gacaatthtc ttttagcaaaa aaagaaatgc tttatcatca aaattatthgt  
6061 ggttgattht atgggctaaa aaaacaaaaa caggataaaa atthttatcga tgaatthaatg  
6121 tcacctatta atgctcaaat tttacctgca agcgtagaag ctagaatagc tctttataaa  
6181 aaagtcaatc tattagaaaa aaaaggtata aaatthgaaa tcataagaca aaaatthttta  
6241 aattaccgac tthtaaatgc tthtaataaag cttgataaaa aagctgtthaa aagtcatatt  
6301 ttatthttatt ctcatthttaa aaatcattat acaagatthta gcttagatga aaaaatthttta  
6361 aatgaaaatt taaaagatgg aatthtataaa agtatgaagg atgaaatthtag ctttatagaa  
6421 ttttgccgct ttaattctta ttttaaaaaat aaatggaaaa atthttgaaga ttttttaaaa  
6481 tatcctthtga aaatagaaga agaaatthaaa tggagaaata agcattthttgg agcttatgat  
6541 cttagtctctg ttatagtgct tgaaaaaatt ttacctaca gatatgagat ttagccaag  
6601 agtgaaatth atthttgatat taaggaagta ataaaaagaa ttagatthta aaatathttta  
6661 aatctactta aaaatthtgc taaaatthgg taatthtaaca taatthtttaa tgatthtttt  
6721 atataattga gttthttaa gttthttaaagg ctgattthaat gatagatgta atgcaaatct  
6781 aagaaattht acctcaccgt taccctthtt tacttgthtga taaaatcaca gagthtaaaag  
6841 tcggagaagt tgttcgagga tataaaaaata tcagcataag tgatcatgth tttatgggac  
6901 atthttccagg ccatcctatt tatctggag ttttgattht agaaggtatg gcgcaaacag  
6961 gtgggtgtht agctthttgaa agtatggatg ctaaggtaga tccacaaagc aaggtthgtat

7021 attttacggg tattgacgga gctaaattta gaaaccctgt tcgtcctgga gatagacttg  
7081 attatgaaat gcaagtgggtg aaaaaccgtg gtaatatgtg gattttttaa ggtcaagctt  
7141 ttgtagatgg aaatthgggt gcagaagcag aacttaaagc tatgatagta gataaataag  
7201 agagaataag tgaaaaaaat tcaccttagt gctgtaatag aagatggagc tatttttaggt  
7261 gatgatgttg ttatcgaggc ttatgcgtat gtaagtaaag aagctaagat aggcaatggg  
7321 gttgttatca aacaaggcgc gagaatactt tcagatacta ccataggtga tcattctcgt  
7381 gtattttcat atgctatagt aggcgatatt cctcaagata tatcttataa agatgagcaa  
7441 aaaagtggag tgattatagg gcaaaattct actattaggg aatttgctac gattaattca  
7501 ggcacggcca agggcgatgg ttttactcgc ataggggata atgcttttat aatggcgtat  
7561 tgtcatatcg cacatgattg ccttttggga gataatatta ttttagccaa taatgcaacc  
7621 ttagcagggc atgtagagct aggagattht actgtttgtg gtgggcttac tcctattcat  
7681 cagtttgta aagtaggcga gggttgcatg atagcaggtg cgagtgcgct ttcgcaagat  
7741 atagtgcctt tttgcttagc tgaaggcaac cgtgcgagta taagaagttt gaatttagta  
7801 ggaattcgtc gtcgttttga taaggatgaa gtagatagac tcagcaaagc ttttaaattc  
7861 ttgttttagac aaggggactt aaaagaaaat gctcaaaaat tattagaaaa taatgaaagt  
7921 gaaaatatta ataaaatgtg caaatttata ttagaaacta agcgtggaat tcctgtatat  
7981 agaggtaaaa ataatgccta gaaaatgcag tttttgtaat gaggtggaaa gtccacaaag  
8041 aagaattht gctaataaaa atgatgacgc atthatttgt gagtattgtg ttgagggagc  
8101 ttatagtatt atthattggcg aagaaaaaga atthaaagag ccaaaacacg aacatggtgt  
8161 agatttttaa gatattactc caaaagaatt aaaggcttat ttggatcgtt atgtaatagg  
8221 acaagataga gctaaaaaag ttttttagcgt gggagtttat aatcattata aaagacttht  
8281 taaatcagag cttcaagatg atgatgtgga gcttttttaa tccaatattc ttcttatagg  
8341 tcccacaggt agcggaaaaa cttactttgc tcaaacttta gccaaattht tggatgtacc  
8401 tatagcaatt tgtgatgcaa cttctthaac cgaagcaggt tatgtgggtg aggatgtgga  
8461 aatattht acccgtctth tgcaagctgc cgatggagat gtagaaaagag ctcaaaaggg  
8521 tatagtattt attgatgaga ttgataaaaat agctagaatg agtgaaaatc gttctatcac  
8581 ccgtgatgtg agtggagaag gtgtgcaaca agctthgctt aaaattatag aaggaagctt  
8641 ggtaaatatt ccacaaaag gcggaagaaa acatccta at caagatttht ttcaaattga  
8701 cacttcaat atthatttgg tttgtgggtg agcatttgat ggcttagaaa ctatacttaa  
8761 gagaaaatta ggtgataaag tcgtaggtth ttttgataat gaaaaagaaa atagcaaagc  
8821 cttgcttgaa aagatagagc ctgatgattt ggtgcattth ggtcttatac ctgaactcat  
8881 agggcgcttg catgttataa cttctthaaa tgaactgaa gaagatgata tggtaagaat  
8941 tthactgag caaaaaatg ctattgtaaa gcaatatcaa aaacttht cctattgatg  
9001 cgtgaattht aaatthgaag atgatgctth aagagaaata gcaaaattag ctctagaacg  
9061 aaaaacgggt gctaggggac ttagaagcat tatagaagaa ataatggtag atthgatgtt  
9121 tgagttgcca gaatataaaa atthgacat cgttatcacc aaagaagtag taagagatgg  
9181 tgcgaaagca ttattaatta aaaagaaaat aagctaaaaa gggataaaaa tgattthaga  
9241 tcaacttata ggatttht caagcगतat gggatagat ttaggaaccg ctaatactct  
9301 tgtthtggta aaagataagg gtatagttat taatgaacc tctgtttgtg cagtagagag  
9361 agaaaagtat ggctctagag ctaaaattht agctgtagga aaagaagcta aagataggt  
9421 tggtaaaacc ccaggaata tcgaagctat tcgtcctatg aaagatggag ttatcgctga  
9481 tthtगतatg acagaaaaa tgattcgtta tthtatagaa aaaactcatc gtagaaaaag  
9541 tthttaaaga ctagaatca tcatttcagt tccttatggt ttaactcaag ttgaaagaaa  
9601 ggctgttaga gaaagtgcct taagtgcagg tgcaagagag gtatttht tagaagagcc  
9661 tatggcagca gctattgggg caaatttgcc tatacaagag cctaagggaa atthggtgt  
9721 agatataggg ggtggaacaa ctgaaattgg tgtgattct ttaggtggac ttgttatttc  
9781 aaaatctatt cgcactgcgg gcgataaact tgatacaagt atagttaatt atgttaagaa  
9841 aaaatacaat cttatcattg gtgaaagaac tggcgaagag attaagatcg ctattggttc  
9901 agccattcag cttccaaaag agctthctat ggttgtaag gggcgtgatc aagtgagtg  
9961 actthtaagt cgtattgagc ttacaagcga agacgttaga gaggcaatga gagagtatt  
10021 aaaagaaata gcagacgcct taaagatggt acttgaaatg atgccactg atcttgcaag  
10081 tgatatagta gaaaatgggt ttgtthaac aggtgggtgga gcattgattc gtgggcttga  
10141 taaattht agtgaaatg ttcgcttgcc agtatatatt gctgatgagc cgctthtagc  
10201 ttagccaaa ggaacaggt aagctthgga ggaaatthc ctattgcaac aattgacgaa

10261 tgaagaataa gcttatattht gttcttgtht taththththt agthththtata tctththtact  
10321 atgggggctt ggtataaaaa aatathcttht tggtaaatga tgcggtgtht gaaaaaththt  
10381 atggagthta agaththtath gcccgaathctt ththccaagca ththtaathca gtagagcaaa  
10441 ttgaacaath aaaagcaaga aathcaagagc tagaathatgc agctgtathg actacaagtht  
10501 ttgcaaatca athtaathctg atththtagagg athaagaathc aacaagathat ttacttcaag  
10561 ththctthtagt aagagctath tctthtagtga gathaaathga thtaagaga thtggtgcttg  
10621 atththgctaa agththctctt aataaaaaaca agggththgat tcatcaagga tatactathg  
10681 gcaththgcat taataaagath ggtagagctha tggcgcttht acagggcgath gagcaathgcg  
10741 ththththctgt athatgtaggt aaaaaataaaa thctctggcct ththccaaggc gaagathgata  
10801 aathcaaggt thaaaththata cthaaathggg caaagathaa thathggagath gagaththta  
10861 caagcggtct tgataathatc ththththctag atgtthcagth tggcaththgta agcgcaathc  
10921 aagathggaga thgathathca agthgctgaag thaaathctta thgctathatc aathathctccg  
10981 cthathctthta thathgthcat agctthataaa thcaathctta aathctththt aathaaaththt  
11041 ccatathggac thththththtath thaaaththctg caaththctt thgathththaa atththcttht  
11101 aathaththgta athagaaththc athgathagaa athgathctt gggctaaath atgthgaggg  
11161 caththththg cathgggtata atgctathga atthththgaa ththaaagthga gthththgathc  
11221 thgacthaata athaththcaa aggagctthta aaaaaaththg thththcttht ggcaththgata  
11281 gaaagathaaa athathctcag thcathagath ththththctath aagaathcaaa aagthataaa  
11341 gaththththaa gaththcttht aathagththta athcataagth ththaaaththg aaththththgth  
11401 ththththgth aathaaaththc ththgggagaa aathcaaaath caagthaaaga ththathagaa  
11461 thaththctac thgaththaa agathgthgct thctathththt cathctthct cathagthaa  
11521 aththgagctt ththgctathc gctathththga thathcthaagg thathgataaa athctthataa  
11581 gthgggaththg gaaaagcagg thgthgathata agcgagctt thththctgth ththcaaaathg  
11641 ththththgath cathgathgta thctctathca athgathgthga ththctathctt thctaththgta  
11701 ththaaagathg thgthaaathc atththctgth thgthctcata thththaaagg athagthaaag  
11761 aaththcaaaa thththcttht gctththggth thcaagthctt ththctgthgth atththctata  
11821 aaththgath gggthctgthg atctththgccc aathathththg caathththgct caathcthaag  
11881 cthgathththt cthaaaththc thgthgthctha thctththgath ththathgath thctactthta  
11941 aathathththt thgththcttht thgathathaaa cathathththt ththgthththt thaththththt  
12001 aathaththaa aathathaggt aathathgath athcaaaathth aaththththgth caaaathath  
12061 athcaaaathth thththththggc thcaaaathca cathathcaaa cthaaaththt agcathththtath  
12121 thththcaaaa aathactthath aathgcaath caaththath agaaaggtath gaththgggt  
12181 athththththg agcagaththta thgagathct ththcaaaathc thgagathctt thgggctgaa  
12241 gathgaththaaa aagthgaththg ththathathga thgggathagath thgctthgathga thagcathggg  
12301 cathathgath ggtthththggc cgggtgthgath aathaththgth athathgthgct thgaththathcath  
12361 thathathathg thgaggggtgath thcaathgath thgathththg aththctctgth thathgathathcath  
12421 aagaththththt athathththaa gcaaththctg gathctgththg caathagthgath cggaathththta  
12481 gcaathcaagg gctgthgththaa aggggathctg gthththththt athathgcaath gathathctgaa  
12541 gathctthathg cathgctthgct ththgthcaaga ththgggctha thctathagthgth thgathththgga  
12601 ggtthththgath cathathgathgct thgctaththagg athagaagathg ththaaathctag aathgathath  
12661 agthgcaagth gthgggathgath agthagthgath athaththgath athcaathctath ththgathgaa  
12721 gathgaththaaa aathgthathca thagcctath aththgctthgath ththggcaathc cthcaathath  
12781 agggcaaththata thgctcctthg gagggathath gaththgggath ththgaagathgath gaaathctgthc  
12841 ggtgthgathc thgthathctgth ththgaththath gathctgcttht athathathththata thathctgaggt  
12901 athathaggtth ctcaathaaagg agthathctgth thctathggthg gctathctgth agcaathgaaa  
12961 thggthgathgath athathathctha cathgcthaaa gathgagathg ththththththath thgctthctgath  
13021 gthaggtthggg thththgggathca thctthththata gthththgathcath thththathgaa thggathgthathcath  
13081 athathgaththt athgaagthcaaa gctthgthaaagath athgcthaathcath ththgathgatht  
13141 athagaagath acaathagthaaa ththgctththt thcathgctcaaa thgctthththgath ggcaththaaa  
13201 aathgaagathc ththaaagathgath athggathcaaa aagthththath thgathgathctt aagathctath  
13261 thththgathgath gthgaaagathg thgathgathgath athathththath gathgathgathaaa gctthathcaaaa  
13321 aathctgthaa ththgathaththg thggcaathct gaaathaggtth gggcaththgathgath ggcthaathctct  
13381 ththgggctthgath aagcathcaagth thththaaagca ggaathctcaaa caathathctath gctcathgaththt  
13441 aathcthaagth thththgathgath aathaggtcaaa gathctthggath cagghaththaaa aggaathththg

13501 tgcttgaaac ttcctttacc tccagcttgt ttaatgggaa tttgggagaa tgatgaaaga  
13561 tatcgtaggg gatatttaga tcaatttcca ggctattatc taacaggaga tacgggttat  
13621 atcgacaaag atggctatgt atatgtttta ggaagaatgg atggaatcat taatgttgca  
13681 ggccataggg tttcaactgg ggaatggaa gagattatag caaacatcc tgatgttgca  
13741 gaatgtgagg ttataggtgt aatgatgaa cttaagggtg aaatacctat gggttttata  
13801 gttttaaaag aaggtataga gcgagatcat aggggtatag ttgaagggtg ttagctttg  
13861 gtgctcaag aaattggagc ttagcttcg tttaaaattg ccacagttgt tagtctttg  
13921 cctaagacaa gaagtggaaa aattttgctg aaaaatttaa gagaaatagc agatggttcg  
13981 actttaaatg ttccagctac tattgaggac agcaatgttt taaaagcttg cgaaaaagct  
14041 attaagtatt taggataccc aaaaaataaa ggagagaaat aatgagtgcg ggaaaaaaat  
14101 ttaaagaatt agtaaagaca agcaaaccct tgaccatagt aggagctgtc aatgcttata  
14161 gtgctttaca agctactaaa ataggacata aagctttata tctttcagga agtggcgtgg  
14221 caagtgcgag ttatggcttg cctgatttag ggattatcgc gcttgaagaa gtatgcattg  
14281 atgtaagacg tatttgttct agagtggata cgcctttatt ggttgatgca gatacgggtt  
14341 ttggaggcgc ttttaattat gcaagaacga taaaagaatt aattcgcgcg ggtgcagcag  
14401 caactcatat tgaagatcaa gtagctcaa aaaggtgcgg acatcgtcct aataaagaat  
14461 tagtaagcac tgaagagatg tgtgatcgt ttaaagcggc ttagatgca aaaatcgatc  
14521 ctgattttgt gattatggca agaacggatg cgcattcaat tgaaggtcag caaaaagcta  
14581 ttgaaagggc tttagcatat gttgaggctg gagctgaaat ggtttttgct gaagctatta  
14641 caagtttaga agaatatgaa gaatttgtta aaaatgtaaa agttccaatt cttgcaaata  
14701 tcacagaatt tggaaaaact ccttatttta ccaagaaga attaaataga gcaggagtgt  
14761 ctatgggtgct ttatccttta agtgcaaatc gcgcgatgaa taaagctgca gtgcaagttt  
14821 atgaaagcat attgaaaaac ggacatcaa aagatgtgct tgagattatg caaactagag  
14881 aagagcttta tgaatgcta gattattatt cttatgagca aaaattagat gaattattta  
14941 aaagaggtgc aaaatgagta taagtgaagc aactaaaaaa acaggtgggt tggcaggagt  
15001 tatcgcaggg caaagtgcaa tttgtacttg cgggcttggg aatggactaa attattatgg  
15061 ttatagcata gaagagttag cgcaaatgc agaatttgaa gaaatagctt atttgcttca  
15121 gtttggagaa ttaccaatg caaagaatt ggaaaattat aaagaaaaaa tcattgccca  
15181 aagagctttg agtgaatatt taaaagcgt tttaaaagct atacctaaag aagttcatcc  
15241 tatgaatttg atgcaagcag ctgttgccgc attaggagct ttagagggtg aaaatgagga  
15301 ttttagcgat caagatgaaa aatcatcag acttttagga atcttaccga gtgtgctttg  
15361 ttattggcat cattatgtga attttggtaa agaaattgat tttgactcta agcaacaag  
15421 tatagcggga tttttttgg aaaaattaaa acttgaagct ccaaaagaag attttatcaa  
15481 ggctatgcaa tgctcattaa tcctttatgc agagcacgaa tttaatgctt caacttttac  
15541 agctagaatt tgtgcttcta caaaaagtga ttttttagt gcggttgctg cagccattgg  
15601 agctttaaga ggacctttgc atggaggagc aatgaagca gcgatgcac taatagaaag  
15661 ttttaaaagt gttgaggatg ctattaaggg tgtgaatgaa aaattagaaa ataaagagct  
15721 tttaatgggc tttggtcacc gtgtttatgg acttggaggc gatcctagaa atgctttat  
15781 taaggtttgg agtaagcatt taggaggtga tgatttgctt tttaaaatca gtgaagccat  
15841 agaagctttg atgaaagaaa aacgcccaag tttgccacct aatgcagatt tttatagtgc  
15901 atcagcttat cattttatgg gaattccaac tgagtatttt acgccgattt ttattatgag  
15961 tcgcgtaagt ggttggtgtg cgcatattaa agagcaaaga gcaacaata aacttatacg  
16021 ccaagtagc gaatatatag gcgttgaacc aagaaaattt gtaaaaattc aagacagata  
16081 aggagaaaa atgagtgata tgggaatttt agaggcaaaa cgccctgaat ttgatgaact  
16141 ttaacaaaa attgcaaaa atgctgatga atttgaaatc acaagtgatt tggctttaga  
16201 aacggctaga tattgtttta tggatactat aggttgtgga cttttagcgc ttaaatatcc  
16261 tgcttgcacc aagcttttag ggccaagtgt tgaaggggct gaatttagac ctttaggcgc  
16321 aaaagtgttt ggaacttctt atcaattaga gccaatccgc ggagctttta atgtgggcgc  
16381 tatgtaaga tggcttgatt ttaatgatac atggcttgcg gctgaatggg gacatccaag  
16441 cgataatttg ggtgctgatt gggcgtgagc tgattatgta agtcgtaaaa atatctctga  
16501 gggaaaagag cttttaaag taaaatgtgt ctaaaagcc atgataaaag ctcatgaaat  
16561 tcaaggagtt ttggcacttg aaaattgctt taataaagta ggaatggatc atgttttact  
16621 tgtaagaata gcaagtactg cagtagctgc aaagcttttg ggttgaatt ttgaagaaat  
16681 tcgcaatgcc atttctcatg cttttattga tgggtggagct ttaagaacct atcgtcacgc

16741 accaaataca ggcagtagga aaagttgggc agcgggtgat gcttcaagtc gcgggggtgga  
16801 tcttgcttta aaagctaaaa caggagagat gggttatcct tcagctttaa gtgctaaatt  
16861 ttggggctat gaagatgtga aatgaaagg acaaaaactc accattcctc aagaatttgg  
16921 ctcttatgta atggaaaatg ttttatttaa aatttctttc ccagctgaat ttcacgcaca  
16981 aaccgcagta gaagcagctt tagctttaca tgatgaggta aaagatcggt tggatcaaat  
17041 agaaaaaatc atcatcacia ctcaagaatc aggccatcgc atcatcaata aagtaggtga  
17101 gcttgcaaac cctgccgata gggatcattg tatccagtat atggttgctg taccacttat  
17161 ctttggacgt ttaaatgcag atgattatga agatagtgtt gcaagcgatg aaagaatcga  
17221 tgccttaaga gctaaaatgc aagtagaagt ggatgatcgc tatacaaaag agtattttaga  
17281 aagtataaaa agaagcatag ctaatgctgt gcaagttttc tttaaagatg gcacaagcac  
17341 aaaaaaagtc gaagttgagt atcctatagg acataaaaaga cgcagaaatg aaggaatccc  
17401 tcttttaatt gccaaattta aagccaatct tgctacgcgt ttaagtcaa aacaatgcga  
17461 aaaaatcatg caaatttgcg aagatcaaaa aagcttagag caaatgaatt ttaacgaatt  
17521 tagtgatcct ttttggttgg gttaaaaata taaaacaaga ctattttagt cttgttttta  
17581 agtttagata gagtatgata atatattaat ttcatagcta tttaatattt ctataataaa  
17641 aactaaagc aaaataactg ataattaaga ttaaaaagtt tttttaaaga tcaaaggagc  
17701 ttaaaatag ctaaaaaatc ttaaatttca agctttcttt tttgctttct tagccgctat  
17761 atttaacgct tttgttggaa tttttagtgt ttttctttt aaaaaagggt tttatgagttc  
17821 agaagtagct tttataaat gctttgtggc tagtttgatt ttgtttgcga ttttaattta  
17881 tatgagaaaa ttgggcgctt tgctagtttt tatcaagcag aaaattttca cacttttgcct  
17941 tcttgctttt tttggatttt ttatgcttta tcattttgag agtgctgctt atacaagtat  
18001 gagtgtggct aatgtagttt ttgtgctttt tgggtgtggga atgatcatca cttttatttg  
18061 tgaagcattg gacgctaaac gcttttttca tttaaatgag cttttggcta tggtttttgc  
18121 gcttttggga ctttggatga ttttttggc cgaagggtgga acttttagaaa atttcactca  
18181 tttaaaagac ctggtaaatg ctatttttagc aggacttggc tatgctttat ttttattttt  
18241 tactagaaaa ttaaaactgg gttttgggtt aattcctctt tgtgctttgc tttttatagg  
18301 aagtttgtat ttgagtattc ctttgtttgg agcaaattta aatcttaatt tttctttaga  
18361 gagtcttggt ttacttttag ctttagcatt tttgcctact ataggtggat tttactgcac  
18421 tactagagcc ttaagtcttg caaagtcaaa ttcagtccag cttatagaac ttagtgagcc  
18481 tttatttgct atgctttttg ggtttttgtt tttggctcaa agtgtttcat ttttgcaaat  
18541 tgtaggtgga gttttcatac tttttgctat ttttgtccat gaatttaaat taaaattgta  
18601 aaaagcagtt ttttagaaat ttttttcaat tggattttta aaatttcttt agaaagagca  
18661 gatgctttat ggcaaacaaa agattgttta ttgcttgagt tttgacattg attttgacta  
18721 ttttttgcg tgattttaat aagatataat tgcatagctt gatctttgga atttttatca  
18781 actgccatat tgcaatcagc ataatatcca gcctgacaag atttataaaa aagtttttgg  
18841 gctaaaatat catttttatt aaataattca acccagcctt gcgcaaagca caactttgta  
18901 tctttttcac aaatttttaga gcttaactct ttagctttga ttaagtcctt ttctactcct  
18961 tgtccgcatg catacatata agaaagtcct gcacaaatag catcatgccc ttgctcgcag  
19021 ctttttttgg ctagtataat tgctgatttt gtatcttttt tactaagtgt agcgatatgt  
19081 tctaataaag cagaacttga gttttgatct aagaaatatt ttaaattgct ttgataagtt  
19141 ttttcatcta gctttttcaa taatttaaat tttatattgt tgattctcgc gcaagagtcc  
19201 aatcttcaa gcttacaagc tttttgtaaa agcaataaag ctttgtttta atccaaagaa  
19261 agtcttgtgt ctgctgcaaa ttctcctcct aaataagcac atgcggtggc attgttttct  
19321 aagcattggt tttgaaaaag acttaaatca ctctcgaaaa aatattccc ctttggagta  
19381 agagcaaaat tttcctttta gggttgattt aaaatttctt ttaaattctc gtccaagaat  
19441 tgattaatgc ctaaattttc ttttatattt tggggtaaat tatttgctaa aacagaaaat  
19501 tgacaaaaaa atattaaaaa aactaaaatt ttaatttttt tcatgggtat ttctttcttg  
19561 cctatttttt taaaattata acagaatttc aaagtttgta aaactaaaaat ttgatataat  
19621 cagcccaaat ttatgctctt aggaaaattc atgccaaaac gaacagatat taaaaatatt  
19681 ttacttatag gaagtgttcc tatcgtgata ggtcaagctt gtgaatttga ttattcagga  
19741 actcaagcag caaaaacctt aaaagaacaa ggatatcgcg tagttttaat caattccaac  
19801 ccagcaacta ttatgactga tcctgaattt gctgatgcta cttacataga gcctgtaacc  
19861 aaggaaagta ttttaagcat tattaaaaaa gagaaaatcg atgccatttt gccaaactatg  
19921 ggtggacaag tagctcttaa tgtggctatg gaagtttatg aaagcgggct tttaggtgat

19981 gtgaagtttt tgggtgcaaa ccctgaggca attaaaaaag gtgaagatcg tcaagttttt  
20041 aaagaatgta tgaaaaaaat cggataggat ttgccaaaat ctatgtacgc atataattat  
20101 gatgaagcct taaaagctgt agatgaaatc ggctttcctt taatgatccg tgcgtcttat  
20161 accttaggtg gtgctggaag cgggtgtggt tacaatatgg atgaatttaa agaactcgc  
20221 aatgctgctt tagcactttc gccaatccat gaaattctta tcgaagaaag tttacttgga  
20281 tggaaagagt atgaaatgga gggtatccgc gataaaaatg ataattgtat cattgtatgt  
20341 agtatagaaa acctcgatcc tatgggagtg catabaggag atagtatcac agttgcacct  
20401 gctcttacct taactgataa agaataccaa gtcatgcgta atgcctcttt tgctattttg  
20461 cgtgaaatag gcgtggatac gggtggatca aatgtacaat ttgctgtcaa tccaacaaat  
20521 ggtagaatga tagttattga aatgaatcca agagtttcaa gatcaagcgc ctagcttct  
20581 aaagcaacgg gttatcctat agcaaagggt gcaacacttt tagcaattgg atttagctta  
20641 gatgagataa aaaatgatat tacaggtact cctgctagtt ttgaacctgt gattgattat  
20701 attgttacia aaattcctcg ctttactttt gagaaattcc caggagccaa tacaacttta  
20761 ggtacagcga tgaaaagcgt gggtgaagta atggctattg gccgaacttt taaagaaagt  
20821 atacaaaagg cactttgttc tttggaaaga aatttaagtg gttttgatag agtgaaattt  
20881 gaagataaaa acgatcttat ctttaaaatt cgcaatgcta acgaaaagcg tttactttat  
20941 gtagcacaag cttttagggg aggttttgat gtaaaaagagc tttatgagct ttgtaaaatc  
21001 gatccttggg ttttatccca aattaaagaa attgtggatt ttgaagagca aattgatatg  
21061 gatatcttgc ataacaaaac ctttttaaga aaagcaaaaa ctatgggttt ttcagacaag  
21121 atgatcgctt tgcttgtgaa tctaaaagat aatttagaat taagtcaaaa tgacatttat  
21181 tatgcaagaa tgaagcaaaa aatcatagca gaatttagcg aagtggatac ttgtgcggga  
21241 gaatttgaag ctttaactcc ttatctttat tctagtatca atgtgagtga gcttactcaa  
21301 agcaaaaatg aagcaagaga taaaaaagaa aaaaaagtga tgattatagg tggggggcca  
21361 aatcgtatag gacaaggaat cgaatttgac tatgcttgtg tacatgcttc ttttgcatta  
21421 aaggatttgg gtgtaaaaac cattatgtat aattgcaatc cagaaactgt ttcaacggat  
21481 tatgatacga gtgatatttt gtatttcgag cctattgatt ttgagcattt gcgtgggtgtg  
21541 attgagcgcg aaaaaccaga tggagttata gtgcattttg gtggccaaac tccgcttaaa  
21601 tttgctaaac gcttgagtgc ttttggagct aaaatcatag gcacaagcgc aagagtgatc  
21661 gatatggcag aagatagaaa gaaatttgcc gaatttatca caaaacttgg tattaatcag  
21721 cctaaaaatt ctaccgctac aagcgtagaa gaagcgggtt taaaagcaag tgagataggt  
21781 tatcctgtgc ttgtaagacc aagctatggt ttgggcggaa gagctatgcg tgtggttaat  
21841 gatgagagcg aacttagact ttatatgcaa gaagctgtgg atgtaagtga taaaagtcct  
21901 gttttgatcg atcagtattt agataatgca actgaaatcg atgttgatgc tatcagcgat  
21961 ggtaaagatg tttatgtagc agggattatg gagcatatcg aagaagcagg aattcattca  
22021 ggcgatagtg catgttcttt gccaccttgc aatatcgatg aaaaaatgca agaacaaatt  
22081 atacaaaaaa ctgctaatat tgctttaaat ttaggtgttg tagggctttt aaatatacaa  
22141 tttgcaattt acaataacga acttttatat atagaagtaa atcctagagc aagtcgtact  
22201 gtgccctttg taagtaaagc tacgggcata cttttagcaa aagttgcaac gcgctgatg  
22261 tggcaaggaa atttaaaaga agctttaaaa ttttatgaca cttttgatgt ggtgaatttt  
22321 gataatacga ttttgcgccc taagctttca aaacatatca gcgtaaaaga agcggtattt  
22381 cttttgcta agcttagcgg aagcgattta gagttaggac ctgaaatgag atcaacaggt  
22441 gaggttatgg gtataagtaa ggattttgct aattcttatg caaaaagtca aatttcatct  
22501 tttaatcatt tgcctgaaaa tggcgtagtg tttatctctt taaaggaaaa ggataaaaag  
22561 tatgctaaaa aacttgcaag tgaatactct aagttagggt ttaagctaag ggctacaagt  
22621 ggaacttgca aggaaattgt agaaaatggc tttgagtgcg agcttgtaaa taaaatttca  
22681 gaagggcgtc ctaatgtgga agataagcta aaaaatggag aaattcaact agtgataaac  
22741 acaagtgata gtcatacttt tgcaggggat acgaaaaaaa ttcgtgaaaa tattatccgt  
22801 tttaaaatcc cttattttac aaatttgcgt tcggctcttg cgggtgcaaa atcgattaaa  
22861 gcgatacaaa gtcaaagtta tttagagggt aagagcttgc aggagtatct aaaagcttga  
22921 tttatctagc gcaaacagat actacagcag gatttttaag taaaaattta gaagaaatca  
22981 atgctttaaa aggtagggtc aaggatcagc cctgcttgat tacttctgca aaattcagtg  
23041 agttaaaaaa aatcgtagg gttccaaatc aatttaaaaa tttagtgcgt cgtgctaaaa  
23101 aaacaacttt tatttatcca aacaatcaag caataagaat cgtcaaagag tgtaaacacg  
23161 cacaattttt aaaagaaaag ggctgttttt attcaagttc tgcaaacaaag catggacaaa



23221 aat ttgatga gctttgggct agaagtgtcg cagatgttgt agtcgatgag atat tttttg  
23281 aaaatacccc atcaaaaata ataaaacttc atcgtaaaga gcttagaaaa attcg ttaat  
23341 ttaatgcttg taaaatttct tcaaaagcta tgcaaaattg ctccaagcca tcttttaata  
23401 attcatcgca agctttttct ctttcatttt gtgaaatgat agcattaagt tgtgtgtaaa  
23461 tttcaaaatt cattaaggt tttttaaatt caaattcggg tttaaatgca ttgatagcat  
23521 ctagtggagc agtgtttatg ctattttcaa aaagaagttc tttgatataa taatcttttg  
23581 gcaaatcatc accttttaca cccgtgctcg caaataaagc tcggatatta ggttcatttt  
23641 tggagatgat attgttatag gctaaatttg catttaaaat tcctatacga ttttgttctt  
23701 tcgctttgga attttaaagt ctatcgaac gacttacaaa gatacttata acagcttgtg  
23761 gggttcttaa gcgagtgttt tttccttgta aggctatatt gttttttcta aattcaacca  
23821 aaccggcatt taaagcctca aagcattttt gactttgctc taaagaaaaa atcaaagtag  
23881 catttacact gatgccattt ttcattcaatt catacattac ttcataagaa gcattgggtg  
23941 ctgggacttt aatcatcaca ttatcttttc caatggcact ataaagtttt tttgcctcgc  
24001 ccaaactcaa gcttg tatta tcataaaatc ttggatcgat ttcaaggctt ataaaacct  
24061 catttcctgt gtgatataaa ggagcaagtt tatctgctgc tttttgtata tcagccacag  
24121 caagttcttc gtaaatttcc tttgcctttt ttccttttaa tttcgtatt ttttctttat  
24181 agatgggtga gttttaaata gcatttttga aaatagcggg atttgagggt gccccattga  
24241 tgccacgcga tagtaaattt aaaaaatcat catctaaaaa actat tttct ataaaaatcac  
24301 accaaagaga aaat tttttc atcttatatt acctttatta tttcttttaa gtctttgttg  
24361 tctatgcaaa tatctgcttt tgagcgtaaa atttctttag cacaaaaggc gacttttaaa  
24421 ccgctttcat taacatagc gatatcattt gccccatcac ccacacacat gacttcatga  
24481 gtttgcaaat ttaaaaagtt ttttaaggcgt tgtagcatta aaccctttga atttgaaaac  
24541 atcatttctc caccactag ccctgataaa gtattgtttt tatgatgtag gtaatttgca  
24601 aagcccaaat ttacttttag ttttttcata gcaggatcaa tcccttcatg aaaacctcca  
24661 ctaaaaataa caaaaaat atttttagaa tttaaaaatt caatgagttc ataagctcca  
24721 ttcattcaatg gaagatcttg ccctat tttta agaacaagat cgtaaggcat tccttttaaa  
24781 aaactaacgc gtcctgcaa gctttcaaaa aaatcaagct cacctgccat agcgcgatga  
24841 gtgatatcaa ccacttcttt ttctttgcca taggccttag ctaatatatc gatagtttct  
24901 ccatccatca aagtggaatc aaagtcaaaa acacaaagtt ttatcattaa aattcacgct  
24961 taagcaaggc ttcaacttta agtatggtaa ggatattttc atctctttta cctataccat  
25021 agatcatacc tttatctttt actaaagttt cagggtggcgg atcaatacga tttctatgaa  
25081 ttttgatagc ctcggttaat ctatctatca cgaagcctgc atttctcca acgccactcc  
25141 cattggattc gcctcttaaa acaatataac gagtttgagg agtcatttta gaacttcta  
25201 gattaaaacg ctgcgccaaa tcaattaaag gcataacatt tccacgcata ttaatacac  
25261 ctaaaacata atcaggaacg cttggaacc ttgtgtattc tataggtttg atgatttctt  
25321 gtatgttaag aattggaata gcatattcct catctctac cacaaaacct acaagttgta  
25381 tgatcatc ttctttttga tcaccaacag gaccagctat ctgagtttg tgcttttgca  
25441 atatttgctc taatttttca ttactcatat tcttatccta gtttcaaatt ttttctaacc  
25501 acattttcca aatattctgg agaataaggt ttggtaatat attctgtcat acctacttc  
25561 accctctta gacgatcggg tttacttggt cttgaagtaa cagcaatgag cggtaagttg  
25621 cgatatttg aatattttct aatttcgcc gctaaggtat aaccatccat tcttggcatt  
25681 tcgatatcaa ttaatcgc atcaatatca tgatcgccc attttataat gtttaatgct  
25741 tcaacacat tggtagcttc aataaggcta actcctagt gctctaaggc tttttgcatt  
25801 aaggttctat ccattttaga atcatcgaca attaaaacct tataatcact tggttttct  
25861 tttggtttt tagcacttga ttcaagttga gctttgatgt caacttttat tcttttgcc  
25921 atatccatca tagcggccac atctatgata agtgttactc taccatcacc gcggatagta  
25981 gcaccgcta taccttgaat attttgcaa taatcaccca tagatttaat aacaatttct  
26041 tcttgccta taagagtatc aacaataata cccagtttac tttctgccac gccaataact  
26101 acaacatagg tttgatctcc actttcaagc acttgtttaa ctcaaagac atcagatagt  
26161 cttacaagag aaagcacttc atctctaagg cgcaatacat ttttacctc gatagtataa  
26221 atatcatcaa ttggcactct aactgtttca agtacacttg caagaggaat tgcatagtat  
26281 tcttcttgag ttccaacgag caaggactgg atgatagcca aagtaagagg aat ttttaagt  
26341 ttaa atgaac ttcctttgcc taattcacta tcgatttcaa t cactccgtt gagttttca  
26401 atattagttt taacaacatc cattccaacg ccacgtcctg aacattttgt aacttttgtt

26461 gcagttgaaa aacctggttt aaaaatcaaa gcaaaagcct ctttatcagt catttgatcc  
26521 gcttctcttt cggtaatcaa attcttttct atagctttag cttttaggcc atttgcatca  
26581 agtcccttac catcatcggg aatttctaca acgatatgat ttccttcggt ataagcttta  
26641 agttgtacta tacctttttc aggttttcca ttagcagcac gcggttgctgg atcttcaata  
26701 ccgtgatcgc acgagtttct aatcatatgc atgataggat cgccaatttc ttcgacaata  
26761 gatttatcaa gttcggtttc ttcacctgta atttcaagtt ctatgtgttt gccaaagtca  
26821 cggctcaaac cacgcacaac tcttggaat ttattgaaaa cttttgcaat aggctgcatt  
26881 ctagttttca taactgcaag ttgaacatct gttgtaatga tgcttaattg gcttacaact  
26941 tgatttaatt cttcaaggaa tttttcacc tcatagcgtt cttcgacatc atcataaatt  
27001 ttaagcaagc ggtttttacc caaacaagc tcaccgatga ggttcattag atgatctagt  
27061 ctttttactt caacgcgtat ggtttgatcc ataccgcctc caccgcctcc actagcagga  
27121 accttttct ctgtattttc agcttttggg gtacttgctg ctggtttaga gttttaggtt  
27181 gatgcggcat tttgtttttt ctgggcacga cgtgcttgat cttctgcctt cctagctttt  
27241 aataatcttt ctatttcagc ttcaacttca gaatcactta attgattaac atcgacttca  
27301 ggttctgggt caggagctgg ttcttctttt tgaggagttt ctacaggagt ttcgtttaat  
27361 ttagcgtctc ttggagattc tccttctgat atagctgtta atctggcaca aattggctct  
27421 atatccattt ctatggctgt atcattacca ttatcacgta tagagttaag caaggttttc  
27481 attctatcga tggattctaa aacaacatcc atgatatctg gagtgttttt taattcccca  
27541 tgtcttgctt tatttaaaac atcttccatg tgatgtgtta attttgttaa aacatcaaaa  
27601 tttaaaagc ttgaagaacc ttttacagtg tgtgctacac ggaaaattct gtttaataat  
27661 tctaagtctt ctggatttgt ttcaagttcc actaaatcat ggtcgatttg ctcaactagc  
27721 tcaaaagcct caaccaaaaa gtcttcaagt atttcttgca tatcttccat attttaccct  
27781 tgttcttgag attgggtgtt tttgatgact ttagcaatct cattgaagaa atcacttgca  
27841 ttaaatttaa ccaaatagct ttaccaccg gcttcgtgaa cacctttttc attcataaat  
27901 tcattagata aggatgagtt aaagactata ggaatatctt taaatcttgc atcttcttgg  
27961 atacgtgcag caaaatggaa tccgtccatt tgaggcattt caacatcact gacaataatt  
28021 tttaatattg agcttaaatt ttctccataa atttgactga gttcttcaag cttatttaaa  
28081 cttcaactc catctttaac ttcaattact tgaaagccca tttgttgcatt catttcttta  
28141 acgcgttttc tagctgtcat actatcatct aaaataagtg ctgatccgct gaatttttca  
28201 attttactaa aatctatatc ggttttagga gaataaattc ctaaacttcc aacaacactt  
28261 tctaaatcaa gtattaaaag aacttcatcg ttttctatac gagtgcacacc tgtaattttt  
28321 cttttatcta aagcacctga gcctgtagag aaagtagctg gctctatatac tttccaattg  
28381 atacggcgaa ttcttttagc ttcatgaact ataaagccta taagaatatt gctaaattca  
28441 gtaatgataa ctctagggtt tagcatagtg ctttctggct cgggtgattg catccattta  
28501 gcaagattta ctaccggtat aaccacacct cgaagatcga aaattccttc gatgtaatca  
28561 ggcactcccg gaagttctgt gaggcttggg attttgataa tttctctaac ttttagagaca  
28621 ttcaccccat aaattccctc atagacttta tcgtgtcctt gcttaaagat acggaaatcg  
28681 acaagctcca tttcatttga accggttttc acgatatttt catcaaactt tttgaccctc  
28741 caatttctgt tctcgaatg tgatttcttg atagcattct actacaaaaa aacttctctc  
28801 atatgcaaaa ctagctaagt tgaaatattt aatatctttt tcatctaata ttagattttg  
28861 atgatagtgc cttcgcata cccaaaagcc taaatttcca tttttttat atcttctttt  
28921 ggctaaattt ttaaaatttt caattttata aaaaagattt tttttgtttt ggtttttaag  
28981 aattttattt gaaatagaat ttgaacttat ttgatttaaa aaatttaaaa agactagcaa  
29041 gtaatgattt cttaagcttt taagggtaaa ttgcaaacac ggagataaaa aaatatctcc  
29101 gtgagctaaa gttataaaag aattttttaa atcgggtatt ttacctttac ttgtatgcaa  
29161 attaaatttt aaagggtgtt cttgtaggct aaaaatttta accctttgaa aaaaacgggc  
29221 aagattaaaa tcatgatttc cctcaagata aataatttcc atttttaaag cgagttcttc  
29281 aagaagttaa atatagggtt ttgcaaattc atgcgtagca gagatttcac ctataagtaa  
29341 atcaaaaata tccccatta aatgagttg aggtgtggta atttcgcctt tttttaagc  
29401 ttgtaaaaac tcccaaaaac ctcttctttt atcattttca tgagcatctg cgattaaaat  
29461 cgctccattt tgtaataaaa ttttttatcc ttaaaatttt aaaggttcat agctgataga  
29521 aatgatttca aattcacttt ctccttttgg tagacgcact ttaaaatcat ccccttcttt  
29581 tttgccaagc atagcttttg caataggcga agcaatagaa atataaccct tatctaaatc  
29641 tccttcacaa atacctacta gagtatattt actttctttt tcggtatcta agtccataat

29701 caccacagaa gatccaaatt taacgctatc gtgttcataa cttgaagggt cgattatctg  
29761 tgctcttgcg attaaatcgc taagttctgc gatacgactt tctatcaagg cttgtttttc  
29821 tcttgcagcg tggatttctg ctttttcttt taagtcgcca tgacttcttg cagtgtcgat  
29881 ttctatcaca acagcagggc gttggttctc ttttaaatct ttttaattcag cgcttaattt  
29941 atcatagcca aattggctca tctggttcttt tttcattata tctccttaat tgttattgat  
30001 ttaatatattt agcgagattt ttcgcacttc caaattttaa atattctttt agaaaatgca  
30061 ctttatcaaa aaatgcctta taatcatatt tattataagc ttcataaagg tttaaaacat  
30121 tgacttggtc ttgtaaaaat tcaggattta aagcttcttt tccagcaaaa tcacaaaaaa  
30181 tatttgcaag tccaatgtgt ttttaattttt caaaaagcct tgcgataaat atatcaatag  
30241 ctttgccttt ataagccaac acaaaaggag ttcctacca agctgcttct agggtagcag  
30301 ttccactgca aataaaagca aatcagctt ttttaagtac ttgaggtgta ttgctttgta  
30361 ttttaaaatc ctttatatcg ccataaattt ctaatctttc gagattaaaa ggtggtacgc  
30421 aaaggatttt ttctccttca aatttgcgtg ataattctct aaaaacaggc attaaacgct  
30481 tgatttact gcgtcttgag cctggtaaaa atgctatagt cttttcgtt tcatTTTTgt  
30541 taagtaaaat tttaatatcg ttttcatTTT taaaatcttt aatttcatct aaaagaggat  
30601 gtcctacata tatgcttttt ctaaaaaatt gctcatcaaa aggcaagata gaggctaaaa  
30661 catcaaaatg gttctctata acaggaatac gccctTTTT ccaagcccaa acttgaggca  
30721 ggatataata aattctTTTT gtttttgaat ttgctTTTT taaagccttg gcaaaaggga  
30781 tattaaaagc gggagaatcg atacataaaa ccgctccat tgtttggctt aaagtcaaat  
30841 ttactaattc tttgatcgtc ctttttgctt taaaaatcaa aggcaaaatt tctataaaac  
30901 ccatagcgtc aaattcatgc gagctataaa gtggcttaga atttagagca aattctttgc  
30961 ataaattttc atcataaatt ccataaattt taaattcgc aaattcttct ttataggctt  
31021 ttaaaacttc ttttaaatgt aggtttgccg aaggttctaa ggcgcatact aaaagatttt  
31081 tcattgttac tctttataaa tttttaaaaa taacataata tctaaatttc acttattatt  
31141 tgtcagtttt tattttttta atgaaatatt attgataaaa attatcatta gataaaattt  
31201 atttaattat tttttgctat aatgttttta tggaaattac attagatcaa attttagtag  
31261 cgatggcttt gaccatcctt gccggacttt caaccgctat tggttctgtg atagcatttt  
31321 tttagtagaaa tgacaatctt agaattcttt cttttggcct tggtttttct gctggagtga  
31381 tgatataat ctcttttatg gaaattttgc ctctgcttt tgtggatttt aaaaaatatt  
31441 atcattcagg ttatggagag ctttttagcac ttttatgttt ttttggtgga atttttttat  
31501 cagccatcat cgataaattt atccctgaag atgtcaatc tcacgatcct aaagaagatc  
31561 taagcgagct taaaatttgc ctttgcctc aaaaaaatga aaaagcacc gcttttcatg  
31621 caggcgagcc tttaaaaaag atcaatgtaa aggcattgaa aagaacaggt atatttactg  
31681 cgcttgccat agcgatacat aattttcccg aggttttgc gacttttatc tcaagtcttg  
31741 ataacttag ctttgggtgtg gctatcgccg tagctgtagc tatacacaat atccctgaag  
31801 gaatggcggg ttctttgccg atttatcatg ctacaaaaga taagaaaaaa gcttttattt  
31861 actctgcact ttcgggtata gccgagccta tgggagcgat tgtgggagcg tttttgatct  
31921 tgcctatcat gaatgagctt acttttagcca tcaccttgc tgtagtcgct gggatcatgg  
31981 tgtttatctc ttttgatgag ttattgcctg cagcaaaaac ttatgataaa gccacgata  
32041 gtctttatgg gcttgtttta ggaatggctg taatggcagt gagtttgatt ttgttaaact  
32101 cttgagttaa atcaagattt aataaaacac tatttttgat gatatgcaag atttataaag  
32161 aaataaaaaat taacataata aacttattgt aaaccaagcc atgaaagctt ggttttatta  
32221 gaaaagtatc agtagatcac acttgcttcg attatagcag gagagaaaaa gaaaagcttg  
32281 cttagttcag ttacgataga acgatccaaa agacattctc ctaaaccaaa gcgattttct  
32341 atggcgatgc tagagtcagg aaaagtactc atgcattgat tgccgccatt gattaaagat  
32401 ctaatttgta tagaaccatt tgtcatcggg atgatagaaa aaatagtttg cattttttta  
32461 tcttgtaaat cttgtttgca agattttgtg ccaaaacttt tttcacttaa aacagctaag  
32521 catatatcat cgcccttagg acttacaat tgaacataac caaaaggcaa atcttttgcg  
32581 tgcatatcct tagcttttag ttcttcgtt ggcacaattt cttttaaaaa ccaattttga  
32641 tcttctaact ttttgaagt ttttctaaaa gggcttaaag aaattcctgt ttctaaagat  
32701 cttatagcaa acataggggt aaagtcttct agttcatcta agctaggccc tgcttttaaa  
32761 aagcttaaaa gggcaaaaaa taaaataaaa atttttttca tgttaaactc ctaaggtctt  
32821 ctaaaattta caggaaaatg atccgaagcc aaaaaggttc ttagtctgct taaagctaaa  
32881 atcgcaacta tccggtggtgg gttgtataaa gctgcagtgt tggaaatttc agtgategca

32941 taatcaatcg ttcttccacc cgtttgcgta gaagaaggcg gaacaactac gcgagtgcgt  
33001 gctcttaagt caggatctag caaggttact aaggcgcctg attctctatt aaaatcgctt  
33061 aaaatcatcc aattgatttc aggtctatctt ctaaaaaaca tatccacagc agctacaatg  
33121 gctcctgcgt catttcccc acttgctaga gcgtgtatat tgaaaaaagc atcattgcct  
33181 atgcgtatgc ctataatagg tcttgaagca actggttgag gaggtaaaac aaaaacttca  
33241 tccgcttgca ccctgctaac gatagctaaa ttcacgcgat ttgctcctac atccactcta  
33301 gaataatata tataaacaga gctaggctctt gatacagagc ctaaattcca tatatattca  
33361 tgtataggaa taccacgcc cacgggttgc acttgccctag ggtcatcat agctgtgcta  
33421 ggtaaaacc ctgcttcttg aacagctaaa acatccatag gatttgcgcc ggttatgagt  
33481 tgtcttatgc taacattcca tttgctttca gttgcagctg atgaacctg taaattccaa  
33541 gttccggtat tgtaattttc taaagcggca aacaatacat taaaacttaa aatcaaaaat  
33601 actatTTTTT tcattatctt ctttcatag cgaaaaaatt aataggagc acctatatac  
33661 cattgtctat ctaaattttt ttctttttct tttaaacaat cggttaagta aatattgtaa  
33721 aagctcaaat taaattcttc cattacattt gaaacagggt tttgtataca ttgttgagtg  
33781 gcaaaatttt gaatttgata agcaccatta gtcacgggt aaagtctcca aaactgcgcg  
33841 aagtttgttt gatcgcaagg ataatgaacg atgccatttc tataggcatt taagcaagta  
33901 aatgtttttg catttttaat cattacagta ttgtttggaa attcaatgag ctgccaagct  
33961 cttgcatctc caaaaggctc actagcaaat aaactatac cccatatcca attgccagga  
34021 tttaaagccc agattgttaa agatgctcca ttaggattca taatagtac aaaatcactt  
34081 accatacctg tgttttcgta taaagcattt gaagcaaatt catttgagga ttttagcctt  
34141 ggcaaaggct ctttgacggc gttatctcct ttgaaagtat taggagtgat tacagggtggg  
34201 acaagcggta tggcagggaa ttttttacct tccactaagc ttggtgtgtt ttgtttaaca  
34261 ggggggtgtg gttttgagcc aagtcttaaa ggatcattat cgctaaattt accataggat  
34321 cttcctaagg ggttgatttg ttgttctttt gaagagcaag ctgaaaaaat gattgttaca  
34381 atcaaaaaca tgaagcttaa ttttattttt tgcatatata ctccttgttt taggttttga  
34441 tatattaaca tatattttta tttattttgc tacatcaacg cgacttttaa ttctttcatt  
34501 aatataaagc aatgataaaa tcatcataaa tattaatct tgtaagttta taaaattata  
34561 ttaagatatt tagtatctta ttttttgata ataaacaaat ctttattttt aaatcgcata  
34621 aatatataaa aattgataat aattattgat tgatttgcta acaattttta ttgtaaactc  
34681 caagttctca tctttagta tctaggtaaa atttcgtctt tgggaaattt tatagctttt  
34741 gcttttggtt taaaaaagtc aaacatgctc caccctccta attttttaca atttattatg  
34801 taataatatt aataaatatt aaataaaaaa ataattaaaa atagcataaa attaataatt  
34861 taaaatcaaa aattaatatt acaaagcttt taaaaaata tgctacaatc caaatttatc  
34921 ttttgcaagg aagagtaatg aaagaaattc ttattacca tgatgatggt tttgaaagcg  
34981 aagggtctaa aaaactcatt aaaatgttaa aaaaagaatt taaagcaaaa attaccatag  
35041 ttgcacctgc tactgaaaaa tcagcttgtt cgcattccat aactcttaca aaacctttgc  
35101 gttttatcaa agtgggaaaa agattttaca agcttgatga tggaaactcct gcagattgtg  
35161 tttatcttgc tcttcatgcg ctttataaaa cgcgtttgcc tgatcttgta ataagtggga  
35221 ttaacaaggg tgcaaatgtg ggtgaagata tcacatattc aggtacttgc gcaggcgcta  
35281 tggaaagcagt tttacaagga attcctgcta tagctctttc gcaattttat aagaaaagtg  
35341 aaaaagagct tgatttttaa aatgctttaa agttactaa aaaaatcgtt caaaatatct  
35401 ttgataaagg ctttccttta ggaaaaaaag aattttttaa tattaatttt ccagcaaaaat  
35461 ctaataataaa aggcatataa atttgtaaag caggcaagcg agtgataat tttgaggcgc  
35521 attcaaatat caatccacgt gggatggagt attattggct agcagcagca aatttggatt  
35581 ttgaagatga aaaagatagc gatatagctt tattaaaaaa aggttatgtg actataactc  
35641 ctataatgct tgatttaagc gcttatgaca aaatgaaaaa agttaaaaaa tggttaaagg  
35701 caaataatga atgatagatt tacgcgtata aaatggctag taagcgagga aaatttcgat  
35761 aaaatttcac aaaccaaggt gcttgtatgt ggacttggcg gagtaggtgg gatgtgcgtt  
35821 gacgcacttt atcgtagtgg ttttcaaaat cttactttaa tcgatgcgga taaatttgaa  
35881 atcaccaatc aaaaccgcca aattcatagt gaaaatttag gcgaagaaaa agctaagggtt  
35941 tttgctagaa tttacaatgc taagggtata gtaagtaaaa tagacaatga atttttagca  
36001 aattttgatt taagtgaatt tgatttaatc gtcgatgcga ttgatgatat ccttgcaaaa  
36061 gtagcacttg ctaatttgat cgattttaag cgtcaaat tttatctttc tacgggtggg  
36121 gctagaaagc ttgatcctac gcgtataaaa actacaagta tttttaaacc ccacggagat

36181 gcttttagcaa aaaaatttcg ttacgagcctt agaaaatcag gtttttaaagg aaatthttgat  
36241 gtgggtttttt cagatgagga agcgcattgt aaagatcttg gatctttttat ggggtgtgact  
36301 gcatctttttg gtttggtttt agcaagttha gcattaagaa aagttcttga taagaaaagc  
36361 tgatattaaa gatttaaatg cttgtttgtc gctttttgaa caaagcgtaa taacgctttg  
36421 tgctaaggat tatacaaaag atcaaatcgc tgcttggatt aaaattgata gacggcaatg  
36481 ggaagaaaaa tttaaatatg atgaaattht tctctatgaa aaaagagggg aaatcgcaag  
36541 ttttataagt gttaaaaaag agcagcaatt gctcgatttg ctttttactc atcctgattt  
36601 tgtttagacag ggttttagcac aaaatttact tgattttatt ttaaaaactt atttacataa  
36661 tgaaatttat accttcgcat ccttaagcgc taaagatttt ttcttaaaaa atggttttga  
36721 acttataaga gaaaacaagg ttattaaaga ggggcaaaat ttaaaaaatt ttttaatgaa  
36781 aaaagatgtg gtttataaaa actagaagtt aagataagca aaaataataa attaaaagat  
36841 ataaaaatca ttttttactt atcttagata aatgaattta tctaagatag aaaaaattac  
36901 aaaaaatagt tagatattag aaaatagctc cgtgtttttc ataatttggt atttttgtag  
36961 cagtgttatt ttcatctaca aagacaactt ttggtttaaa tgtttttgct tcttcttcgt  
37021 taaaatcagc ataagacatg atgataatth tatctcccac ttcagcaaga cgagccgcag  
37081 caccatttaa gcatacaacc ctttcttctt gcgtagcgcg ggtgtagggt tcaaatctag  
37141 cgccattatt gatattaact acttgaactt tttcgtattc taaaattcca ctagcttgca  
37201 ataatttttc atctatgctt atacttctca cataatcaag cctagcttct gttacgcttg  
37261 cacggtgtat ttttgatttg agtaaagtaa gtttcatttt aatccttgta ctaaaaaatt  
37321 atcaatgagt cttgtttttc caacaaaagc agccactgct ctaaaaacat tatcggcgat  
37381 attttcaata ttttccatag tgttaaaatc aactaattct atataatcga ttttgattaa  
37441 tttttctttt tctaaaaatc ctttcatagc ttggataatt ttagaactat ctttttctcc  
37501 ttcttgact aatthttcag ctaaaaaaat gctttgagat atagctagtg acgcttttct  
37561 ttcttcttcg ctaagatata ctttctaga gcttttagct aagccatctt cttctctaat  
37621 gatagggcaa atttgaatth ttaaatacaa atthaaatca tcaaccatat gtctaacgac  
37681 tacgcattgc tgcgcgtctt tttgccccat atagactata tcagggttta ggatattaaa  
37741 aaatthtagcc aaaactgtgc aaacgcctct aaaatgccc ggtctthtag ctccacaaag  
37801 cttatccgtg atcgtgttca tatccacata ggtgctaaaa ttcttaagat acatthgagc  
37861 tgcatcgggg ataaaaacca tatcaacgcc attatcttga cacatthtaa tgcgcggtc  
37921 taaatctctt ggataactag aaaaatctt attaggcca aattgcatag gatttaciaa  
37981 gatacttact ataacttht atctgtgtttt ggcattthttg attaaactta aatgccatc  
38041 gtgcaaaaaa ccatgggtg gaacatagcc tataactaaga ttatgtgatt tccaatthtt  
38101 tgtaatttggt tttgcttctt tgacagaagt aataacttcc atatthgtat ctttagtata  
38161 atthtatctaa taattcatca tctaaataat caaagctgtg ctcttgggaa ggaaaaatac  
38221 cgctthtaac ttcatctcta tathtttcaa ctctacttg aggttcaatt ttatcaaaat  
38281 gctthacaaa ttttgcttht aaatcttht ttaaaccctaa aagatcatga taaactaaaa  
38341 cttgtccatc gcagtattht cctgagccta tgccgattgt tggatthtct aaaatagagc  
38401 ttatthtttg tgctaattth acaggcacgc attctaaaac taacatacaa gcaccgcat  
38461 cttgcacagc ttttgcatca tctatgattt tttgagccga ttgtaaatct ttacctgaa  
38521 ccctatatcc acctagcata tttacagctt gtgggggttag tcctaggtga gcaacgacgg  
38581 gtattcctga ttgggaaatc aatthaatct tacttgcgat ttctacacc ctttccactt  
38641 ttacccatt tgcatggctt tctthgataa atcttgaggc atthtaagata gcgtcacgat  
38701 ctgaactthg ataagacata aaaggcatat cagcaagtac gaaagactth ttagctccgc  
38761 gagaaacagc tttggtaaaa atcaacatth catccatagt aacactthaa gtatcttgca  
38821 taccaagcac tgcatagct aatgaatctc caaccaatat aatatctata tcgctattgt  
38881 ctaaaattct tgcactatga taatcatag cactcaccat agttatthtt tcatthtttg  
38941 cttthttttc caaaaaacta atcatactth ttctcattth gcatactca atthtttagct  
39001 ataaaataat aagcaaaaaa ctagcatata aatthtcata aatagtaaat gaatgataaa  
39061 gtgagttata ttttaattat ggattgttht aatggttaca atthttggtt ttttaaatth  
39121 aagtgcctta gtgtaattat agataatgct tagtaggaat tttcgttaga ttttttagtgc  
39181 tgtaatttat ggaatthtct tcaaattthg tctthttatga tttgatataa gtattatgga  
39241 gatattataa aatthaaatc ctttagaaaa tatattcaca agagtattht agaaataaat  
39301 acaatthact aatthtatgct taaatataat atcagtaatg aatatataca ttgtgtctth  
39361 tgggcataaa atthttcataa aaatgcctat ttatthctth aagatthtct gtgtthttggt

39421 gaagttgttc catgtttcct tgagatatct catcttgccct ttgctgttcg tatctataat  
39481 tagctatattg ttgttcatct gcagggtaaa gaattcttcc agtttctatt ccattgctat  
39541 ctgtacatat caatztatca ggttcattat aaaaatattt atatctagga caatctgccg  
39601 gcaccaata catttttcca ttatgatccg cagttatcat accactaaca gagcatccag  
39661 caaaaaataa aataaaaatt accatcgtaa tgacattata aaatttcatt tttctccttt  
39721 aatztatcct ataggatatt ttttaaaaaa ttatatcttt gtaaagttaa atttcatatt  
39781 aatcctatag gataaaaaat gaaagatgac tttagtaatt cttagcgaaga agagatttta  
39841 aatttttata aaaaagtatc atcaaatata agaaaattta gagagaaaaa agggatttct  
39901 cagcttgagt tggctctaga tataggata aaatctgttg cgttttattc aaattgtgag  
39961 tgtaatagat acggtaagca ttttaatttg gagcacttat ataaaaattc taaaagccta  
40021 gaaattccac ttaaagattt attagagtga ttgttttatt aatataaaat acccataaag  
40081 aaaaaatagc aatataaaat aaattgttaa gtttttaagg ttttagtaac ttttcaatct  
40141 attcactatt tatcaagttt tcctacgatg ataggattaa aggcttttat ggatagcaaa  
40201 agcgtatcgc cgatttttat atctttataa gatcttaaaa attcctcttc gctaagtgtg  
40261 attttaacga tatcttgatt taaaagcaaa gtaaaaataa ctaaaatatac actttttttc  
40321 atctcaagca aagtcgctc caagcgcaat ttcgcactta aatttgatga ggtaaaaaat  
40381 tcatttgttc ttgcatcttt gatgattttt ccatcactaa gctctaaaat tctatggctt  
40441 aatttgtaaa tttcagccaa atcgtgactt accaataaag tagtgatttt aaaatgttgt  
40501 aaaattttca caagctcatc ttgtaaaaaa gatcgcattt taaagtctaa tgcgctcaaa  
40561 ggctcatcta aaagtaaaat ttgtggctct cttgctaaag cccttgctaa agccactctt  
40621 tgtgcttgtc cgccacttaa atttttggga taaattttg ctaaattttc caaattcatt  
40681 aagcttaaaa gctcttctgc tttttgtttt gaagtcgcag cataggaaat gttttctttt  
40741 acgctcatat ttggaaaaag agcataatct tgaaaaacaa agccgatttt tctttttgt  
40801 atggctaaat tgatattttt ttgggtatca agccaaagct catctcctac ttttatgctc  
40861 ccaaattcag gttttataag tcctgcaatg attttaagta gagtcgtttt tcccgcaccg  
40921 ctttctcaa aatagcagt gatttcattt gcttttaggc aagtgtttaa ttctagttagc  
40981 ttcttgctt ttgctgtatt aatgggaagt tttatatcga tttttatcat aaagtagcct  
41041 ataaagcaat ttttttattt acaaaaataa gacttaagag tacggtaaaa gaaatcgcaa  
41101 ataaagtaaa agcgtattga tgtgctaagg tatagtttaa aacttcaagc tcatcataaa  
41161 tagcaatact cgcgactaaa gtttcacctt ttttatgtcc acctatcatc atcaccactc  
41221 caaattcacc gatgggtgtg gcaaaactca tcgcacaagc actaaaaatt cctactttgg  
41281 aattgggtaa aatcactcta aaaagtgtgt aaattttacc ctttctaga gtataagaag  
41341 catcaagtag attttgattg atcgatgaaa aagcactttg taaaggattt accataaagg  
41401 gtagggaaaa aatcaaagaa gcaaatacca aaccttcaaa gctaaaaacc aaagaaagg  
41461 taaaatattc ttttaaaaat tgtcctaaaa agctgttttg tgaaaagctt atgagcaaat  
41521 aaaaaccaa aacacttgga ggcaaaacca aaggtagggc tacaagggtt tgcaccaagc  
41581 ttttaaaagg aaatttcaca aagcttaaaa gataggctaa aaatactcca atgaaaaaga  
41641 gtataaagg agtgataaat gcaagtttaa aggtaagata aagggtttgt aaaaaatcat  
41701 tatccataaa cagcctttaa aatgatatcg ttttcttga caaagcaaag ccattcttgt  
41761 ctttcttga gtttgagttc taaggctttt tctttggtga taatgctaga aatttcatca  
41821 cccttaaagt caaaaaagat atgatataga attttgccct ttttaatact tttaatcctt  
41881 gctagaaatg aattttccac acttaaaata gaatgaggca aagcaaagcc aagttcgtgt  
41941 tctttaaaaa gcacttgaat ttttgtacct attttaagat cttgtaaaga atgaagatca  
42001 agcattaaaa ctttaaaaat ttgctcttta atactgatct taacgatgac aatctcacc  
42061 tcatttaaaa gctctataat cttgccattt aagatattca aggtgtgtca aatccgtatt  
42121 ttttaaaagat ttcttttgct ttttgcgaac tgataaaatc actaaattca aaggctaatt  
42181 ttttatcttt agcgtatttt gtgatgacat agctttgttt taaaggggtg aagtatttt  
42241 gatcgatcaa aacagctttg ctttaggat gattgataga agatactaaa gaataagcca  
42301 cgatacctaa atccgcatta ttgctatcaa catgtaaac gggcacggag atattttcac  
42361 ctaaaacaat tttatcttca aagagtttgt ctaaatttaa attttcaagc acttctttag  
42421 cagctactcc ataaggagca acctttggat ttgcaaggct taggtgatga attttatttg  
42481 ctttatcttt tagcttttct atcccacct caagtaagct ttcactaag ctatataggg  
42541 ctaagatacc taaaacataa acttttggtt tatctaaagc gttttgatcc tcataaattg  
42601 cttgctgcta ttttgtatcg gctgaaaaa atagatcaaa ttcctctcct tgttttaaaa

42661 gttgataata ctttcctgaa gcaccaaaaa caagatctat attgtcatta ggggtgtgatt  
42721 ttaaaaattc attttttact tcttccatag cttttgaagc cgaagaagct acgaaaacac  
42781 ttaaattttg tgcatttaaa tttaaagata aaaacaacac tataaaacat aacacgagct  
42841 ttttcattgt actttccttt gtggataatc ttgatttttt gtattataac ataagaaatt  
42901 ttattttgta tcttttttgc ataaaaataa aataggatga taagttagtt tattttgaaa  
42961 tttttcttca aattctttta agaattgctt gtttaagcga taaaatccca aagaatttac  
43021 tccgcttaat tttaaatgcc taaaaacttc taaagcgttt tgaaattcca aatttacaat  
43081 ttcttctgtg attttaatat cagaaaaata gggtttgaaa atttgttcaa gttcctttgt  
43141 actaaaatat tttaaacca agcctgtgct ttgtttgatc tcttttaaat tcatttctcc  
43201 aaaagtagaa agaagtaaaa ttcctttttc atttagcata tttgctagcg tgggcaaaac  
43261 ctgctttaa tcaagccatt gcaaacttgc attagaagtg ataagatcaa atttttgctt  
43321 gcttaaattc tgtgtagcta gggatttcat atcaaaaatt tctacattaa gattgtcagg  
43381 ataactaaa atatcatttt ttagatactc atcaaaagtg ataatttttg aaagcttgtc  
43441 gctaaattca cccctaccgc aaccaaatc aaacactttt ttaaaatgcg aaatttctaa  
43501 attctttaa atttcacaaa gttttaaacc cattaatct tgcacttttg cgtgtttttg  
43561 ataactttt gcttttaaaa aattcaaatt tcatcccaag ttttaaaatg aaaaaagca  
43621 aaatgagggt catttaggaa aataagtttt gaaaaagtat tttttaagc attttgagga  
43681 aaaatttcat cattattgct tgagtaaat ttgtcccaa taaagctttc attacgctct  
43741 ttttaaggcaa attcgaaaag tttttcaagc tcggttttta aatctttttc atctttaag  
43801 ataaaatctt ttgcttcatt ttcgctctc ttaataaag attttttaa agttgtaaga  
43861 tcaaattttt taatttgcct agcaaaaatt gcaggatgaa ttccttttaa tttatctata  
43921 ccaaaaggag taccattgat ggctattttt tgcgaaaact ctatatcttt taaaactcta  
43981 cttgctacgc aaactcccat agaaaaagct atgagagtga ttttagaaaa agagtttaaa  
44041 tcaaatttaa agtctaaatt ttcataatca taaactaaaa ctacattttt atcacttttt  
44101 aaatgtgcaa aatgactagg atgtgaagca aaaccgcaa ataccaagat aagttcttgt  
44161 gagttttcat tttgaattaa attacttatt ttcataaaag ttctaccact ttctttaatt  
44221 cttctttact aagtcctgca tgcaaaagaa aacgaattct ggctgtattt ttaggcaccg  
44281 taggttcttt tatagcgggt gcaaaaatgc catttgtttc aagttttttt gctaattcta  
44341 tagccttttg attttctcct aaaaccaagg agatgatgta agcatcgcct aaaatttgat  
44401 gatttttttc tatgagttga tttttaaaaa agttgcctat gattttagt ttttctctt  
44461 tttcttttag ctgctcatt ttttcaaaaa taaattttgt ccaagctata ttgataggag  
44521 gtagcgtgt agaataaata aaagctctag cttgttgat aaaaaagctt ttataaagat  
44581 ttttacaat catgcaagca cccatagaag caagagcttt accaaaggta aaaactataa  
44641 aatcaacctt ttcttcaaaa tttaaagcct taacaagccc caagccctcc tcatcaaagc  
44701 aaccacgct gtgtgcttca tcgatataaa gtttgatttt agggattttt tctttaaagg  
44761 cgatgagtgt attaaaatca gaaaaatcac catccatact aaataatgct tcgcttaaaa  
44821 tgatgatatt ttcataatga tcataatggt tttgaattaa attttctaaa tgattcatat  
44881 tgttatgatg aaagcgaaaa aattttgctc cgccaagttt cagtcacatca atcactttg  
44941 catggatgaa tttatctgct aaaaaaagtg tatttggaat gcttgcaagt gcagctatac  
45001 aagagatatt aagatgataa ccgctgttaa aatgtaagat ttctttttct ttaaatttgg  
45061 attttaaaaa gctttctaata tcctcataaa ttgtaaaatt tccactcaag ctcttgaac  
45121 ttgagcttga aaaaaataag tcttgttctt tgatattgtc taaaaattca tcttttaag  
45181 atttgcaaga gcttaaatth aaataatcat tccccgctaa atttaaaagc tttttaccct  
45241 ctttaaaaac aaaatttctt tcatgtttga ggcttgtaag ttttctaaga ttatgatttt  
45301 tttcaagggt ttctaagata ttttcaaggc tcattttttt cctaaaattc agaaatttaa  
45361 agtattatth tgccaaaata tatttaaaaa agaagttata atgcaaaatg aaatttttaa  
45421 aaaactcgat ttagagcata tttggcacc ttgtacgcaa atgaaagatc atgaaaattt  
45481 gccactcatt cctataaaaa gagctaaagg agtgtggctt tatgattttg atgataaggc  
45541 ttatatggac tgtgtgagct cgtgggtgggt aaatcttttt gggcattgta atgaaaaaat  
45601 cgcaaatgct attaaaaaac aagttgatga gctagagcat gtgatttttag caggttttac  
45661 acatgagccc atcatcaagc tttctgcaag gctttgcgaa aaagtaggca ggaattttaa  
45721 taaatgtttt tatgcgata atggctcaag tgctattgaa gtcgcactta agatgagctt  
45781 tcattatcat ttaaataaag gagtgaaaaa aagtaaattt ttatctttaa gcaattctta  
45841 tcatgggtgaa accttagggg ctttaagtgt aggagatgta gcactttata aagatactta

45901 taaaccttta ctttttagagt gtttaagcac gcctgtgcca caaagtaaag attacactca  
45961 agagcttgaa attttaaaag atatttttaga aaaaaatgca agtgaaatth gcgcttttat  
46021 acttgaaccc ttgggtgcaat gcgcgggaaa tatgcatatg tatgaagcag ggttttattga  
46081 tgaggctata aagctttgtc atcaatttgg agtgcaagtg atttttgatg aaatcgctgt  
46141 gggttttgga cgcacagggg gttttatttgc tttacatcaa tgtaaagaaa gtcctgattt  
46201 tatctgcctt tcaaaagggg tcacaggcgg atttatgcca ctttctgtgg tgcttacaag  
46261 agatgaaatt tataatgctt tttatgatac ttatgaaagc caaaaggctt ttttacattc  
46321 tcatagttat acgggaaata ccttagcttg tgcggcagca aatgcbggtt tagatatctt  
46381 tgagaatgaa aatatttttag aaaaaaatca aattttaagc gagtttatca aaaaagaatt  
46441 ttcaagactt gaaaaatttg actttttggg taattttaga acttgcggga tgatcagtcg  
46501 ttttgatatt ttaagcacca agtataaacg cgtaggactt tttgtattta ggaaggcctt  
46561 ggaaaaaggt ttgcttttaa ggcctttggc aaatacgatt tattttatgc ccccttacat  
46621 catcacaaa gagcaaatth ctttctgtgg ggatacttta gagcaaatth ttaaggattt  
46681 ttgagagatt ttcacaaacc ctatcgtcaa attctacgat aggaatttgt gtgtatttgc  
46741 tgataaaatc cttactaaaa tgatcttcac tctttagcac taaggcaagg atttcaatac  
46801 ctctttgtht taaagcttct atgcttaaaa gcgtatgatt gatacttctt agatagtctt  
46861 tggctaccaa aagggtgggg tgthttaaatt cgctcatata atcaatcata gttttttcat  
46921 catcaatagg cgaaaaaagc ccaccgcaa gctctatgat aagcttatcg ctttgaggaa  
46981 tttgtatata aaaggctthg tagthttagtt tttctaaaat tcttgcctta tgtgggtgaag  
47041 caggagtht gtaaacacaca ccctctthta aaatcttagt tttagggtcg aatttagcca  
47101 cttcatcact atctthtggc acccctgctt gaatgagtht aaaataatca aaaccaatt  
47161 ctttacaat tctagcgtc aaataagtct tgccaacatc tgtatctata ccgctaattg  
47221 atattttcat thtaatccta tgaaagaatt thtaagccca ctgtacaggc gatgataagt  
47281 gctattaaaa aaagthttaa aaagcttht ctttctthtgt aaaaaagcac acctactata  
47341 accccacctg cggtgccagc ccctgtccat atagaataag ctacggtcat agcgatattt  
47401 tgataactaa ggcttaaaaa gctaaatgat aaagcaaac aatgataaaa aattaaaagg  
47461 taaaatttgt thtttagtaag gacgagtht tcatcacta tcacaccta aacttcaaat  
47521 atggcagcta tgaataaaaa gatccattcc atgttattt gcttcttgc ttgtaaatth  
47581 aagtcctata gtgcttaaaa gtataagagc aattaaaaca atthtagcta ctgaaactt  
47641 gatatacaaaa agaaatattt catttaaac aataccaaca gtccaatac ctacaaaaac  
47701 actataagca atgcttactt caagcttht acatgcctta aaaagacaga taaaagagat  
47761 gcaaatgccc ataatagtaa gtatatattg ccaaagctct gtagaatact taagtccgcc  
47821 tacccaaaaa cattctataa gccaccaa aataaccata aaccacgca tattggattt  
47881 cattatgccc ctcttaata thttttgccc ggcaattata gccaaaacaa agtaataaaa  
47941 aaactatcat aaatthactt ttgcctaagc caaattagc tacaattata agcttattth  
48001 ttaagaaagg aaaaagatgt tagaaggat cgthtagagag agtatcggt gaaaagcagc  
48061 taaagcttht aaaagagatg gttatcta atcgcaaacatc tacggaaaag gcttagaaaa  
48121 catcaatgct gctthtcaaag taaatgattt tatcaaggaa gttcgcaaaa aaacaactth  
48181 agcttht gat gtaaaagtag gttcacaaac thtaaatgth gttgtagtgg atttcaaaa  
48241 agatcctgta actgcagaac thaaacatgt ggatttgaaa gttgcacaaa aagggttht  
48301 thctaaatac atggttccag tgaattac aggaacagct atcggtctta aaaataaagg  
48361 tgtthttaat caatcaaaaa gaagattgaa agtaaatgc gcagcagaaa atttacaaa  
48421 thtcttgcag cttagatgtaa gcaagcttga tgtgggtgat gctthacttg ttcgtgatgt  
48481 tgtagtgcct gaggggtgtaa ctatgataga tgctgataga gtagcggtag tggcgtaga  
48541 aaaagctaga tgatcttagt cgtaggctt ggcaatatag gcaaagagta tgaataact  
48601 cgccataatg tcggcttht gcttgttgat ttgctthttaa aagaaggcaa thtcaaat  
48661 ctcaaaact caaatthcaa aggagagctt thtaaatgg gctcttctt atthtthttaa  
48721 cccatactt atatgataa thccggatta agtgtaaaag cagtaaatga thtttataaaa  
48781 tgtgagagaa thtatagctg tcatgatgat atcgatatta atthtaggtg thtgcgttht  
48841 aaaaaaggcg gthtctagtgg gggacataat gggctthttaa gcatagacaa thtatgcgga  
48901 agcgattatg aaagagtgcg tataggagt ggcaagggtg agaathttht thtctatgth  
48961 thgggtaaat thtagaccga agaagatth atthtaagta aggtthttaga gcattctaaa  
49021 aaagcttht thtagcttht tcgtaatgat gatttatcgg ccatatctt aaaaatagc  
49081 thaaaggctt aagatgtgga thttthtctg thttatttca ggaathttht thtaagaatth



49141 tttcattatt tttctatcct tgctggggtt ttattgtggt attgatttac ttttaaat  
49201 caatgacttg cccgatgcgg caaatcttag cttgctttat gtgatctttt tggctttttc  
49261 tgctattact tatgtccttg ctgtctcttt gatctttgct ttagtgcttt ctttagtttc  
49321 tatgataagg gctaataaat ttgtgagcct ttatgcttta gggccttagca agaatttggg  
49381 tatattatct ctttttttat gggctttggt tttttgcttt gtgtatgtgg gattaaat  
49441 tacccttttt gcttatgcaa atgattataa aagaaatatt ctaaaaaatg gcactatggt  
49501 aaaacaaagc ggtgaagttt ttttgaaatt taatgatgaa tttgtttata tttctaaggt  
49561 taataacgga caaagtaccg cacaaaaat taaaatTTTT aatattaagg attttaaatt  
49621 aagttctttt atcgaggcta aaagtggagt ttttgaaaag aaaaattgga ctttaaaaga  
49681 aggaaattha accttgcttc ctaaggagta tgagcttggg gataagggat taaatcag  
49741 cgaatthaaa gagcttgata cccttgaagg ttttaagcct aagattatcg aaggggtggc  
49801 tagcaatagt gattattcta ttttggatat acttgaaagt ttagagcttt ttaaacaca  
49861 aatatcagc atagaagcac ttaaaatcaa tctttacaag cttgtattta tgccattttt  
49921 tgcacctttt ttaatgctta ttatgtatta tttttccca gttattgcaa gattttttaa  
49981 tttggctttt gtagcttttg tagcttttgt agtcactttg cttacttggg gtatgttatt  
50041 tttactatca agattgagcg aaaatgggtg gattttaagt gaattaggca ttgttatgcc  
50101 tattgttttg ttaatttttt taggtgggtt tatgttttac aagcaccgat aaattaagct  
50161 ttaatatagt aaaatthaaa ataaagggtga aaaatggatt ataaaaaact caaagatgaa  
50221 tttcaaacc ctttttatat ttatgatttt gattttatta aagagcgttt tttaggctt  
50281 aaaaatgctt ttaaagctag aaaatctcaa attttttatg cggtaaaagc aaactcaaat  
50341 ttaagtcttt tacaatgct tgtaaagctt gacagcgggt ttgattgctg gagcatagga  
50401 gaggttaagc gtgctthaaa agcaggtgct aaatcttata agataatttt tagtggcgta  
50461 ggaaaaacc aagaagaatt aaaacttgct ttggaatatg atattttata tatcaatctt  
50521 gaaagtgaag ctgaaatgat gcttttagaa agtgtagcta aagagttcaa tctaaaagca  
50581 aggataagta tccgtgtcaa tccaaatgta aatgctaaaa ctcatcctta tatttctaca  
50641 ggtthaaacg aaaataaatt tgggtgtagaa attgatcttg caagaaaaat gtatctttat  
50701 gctaaaaatt cacccattt agagcctatt ggagtgcatt tcatatagg ttctcaatta  
50761 ttagatattt ctcctatcca tgaggctgct acaattgttg caaaattagt aagagagctt  
50821 aaggctttac aaatagagct taaattcttc gatataggcg gtgggcttgg tgtaagatat  
50881 gaaaaagaag atatagagcc tgatctttat gattatgctc aaggaatact tgctcaattg  
50941 catgggcttg atgtaaccat agaatggaa ccaggaagat ttttggttgc taatagtggg  
51001 gaatttgtat gctctgtgct ttatgaaaa cacaataaaa caaagcgttt tgttatagta  
51061 gacggggcta tgaatgatct gattcgccca agtttatatg aagcttatca tgaaattttg  
51121 ttgccttata atcaaggaga agaaagcctt tgtgatgttg tgggtggaat ttgcaagat  
51181 ggagattttt ttgctaaggc aagatttttg ccaagcactc aaaatgggtga tataatgggt  
51241 attaaaaatg ctggagctta tggttttagt atgagtagta attacaatac aagaaataaa  
51301 gtttgcgaat tagcttttga aaatgggtgag gtaagaatga ttcgccaaag ggaaagtttt  
51361 gaagaacaaa ttgccttaga agaacaattt ttaaagggat aaaatgtttt ttttggatgt  
51421 gcaaggaact ttgatttcag atgctgataa atctttgatc tacggcgcta aagaattgat  
51481 tgatttttta aatataaaaa atattcccta tgttgttatt actaacaata caaaaaaat  
51541 tgatttctta gaaagattaa gacaaaaagg attggccatc aaagagggtg cttatatcga  
51601 tccttttagc gttttaaagat atattttaag gccttgcaag gttgcgtctt ttggtgcaga  
51661 ggaatttata caaagccttg aagaattggg ttttgaaatg gattttgaaa atcctatggc  
51721 tgtacttggt gccagttatg atgattttaa attccaagat tttgctttga tgatggaata  
51781 tgctaaagag ggcgtgcaat ttatcgctat gcatgaaagt agcatttata aaaaagaggg  
51841 caggctttat ccgggtgtgg gcagtataat ggcgatgtta caaaatgcta ttgattttaa  
51901 ataccaagtt gtaggtaaac cttagcacagc tttttataaa gaggctttaa ggcttttgag  
51961 gaattataat aaaaatgctg attttgagga cattaataatc attagtgatg attttaaagg  
52021 tgatttgggt caagctaaag aattgggtat gaaaacctta cttgttttaa gtggtaaaat  
52081 aagtgatacc aaaggatttg atacaggcat ggtggataaa atttatccta gcgttttaga  
52141 aattttaaag gatttgaat gccaaattta aacttagaag attttagaaa taaaatcgat  
52201 atggtagatg ataaaatttt agaactttta aatgaaagaa tgagctatgt taaaagcata  
52261 ggagaaatca agcaacaag cgggtggagcg atttatcgtc ctgagcgcga aagagcgatt  
52321 attaatcgtc taaaaaatgc aaatttgggg cttttagatc aaaatgccat agaggctatt

52381 tatcaagaaa tttttgctgt ttcaagaaat ttggaaatgc ctcaaatagt tgcttatttg  
52441 ggtcctgagg gtacttatac tcatcaagca gcaaggagtc gttttggtgc tatgagtcgc  
52501 tatatcgcac ttgcgactat agaggatggt tttaaagagc ttaacaataa agaagcaaaa  
52561 tatggagttg ttcctataga aaataacaca gaagggtgcc taggggtaac tttagattgc  
52621 ttaggtaagt ataacgagct taaaatTTTT ggtgaaatTT atatggatat tcatcattct  
52681 tttgtaggaa ttaatgaaaa tctaaaagag ataaaacgca tttatttctca tccacaaggT  
52741 tacaatcaat gtcgtaaatt tttagaaagc catgagttaa gtaatataga atttgtacct  
52801 tcaaaatcca cagcaaatgc cgcttattta gcctctcaag ataaatattc ggctgcaatt  
52861 tgttctaaaa tagctgcaaa gctttataat gtacctgtgc tttttgataa gatagaagat  
52921 aatgcagcaa atcgtacaag atttttaatt ttaagtgata ttaaaaaatcc aaaaatgccA  
52981 aattgtaaaa cttctatTTT agctcacact gcgcataagc ctggcggTct tagttcttta  
53041 ttagagcaat ttaaaaaaga aatatcaat cttaccaaac tcgaatctcg tcccgtaaaa  
53101 tcaaaagaat ttttacaatag tttttatata gattttgaag ggcatattga tgatgaaaat  
53161 gttcaacgcg ctttgaaaaa tgcagatgaa gtagtttggc ttggatctta tttatcagga  
53221 gaaaaaaatg aaattcaata acttttttaa tcacttaagc aattatgaac cgggcaagga  
53281 tattgaagtt atcgcctagag agtatggcgt aaaagaagtg ataaaattag caagtaatga  
53341 aaatcctttt ggtgctccgc ctaaagcggT taaagttttg caagaaaatg cttttaaggc  
53401 aaatctttat cctgatgaca gcatggtaga gttaaaaggT gaattggcgc aaaaatataa  
53461 tgtaaaaaat gaaaatatca tcattggTgc aggcagcgat caggttattg aatttgctat  
53521 acattctaaa cttaacctcT aaaatgcttt tttgcaagca ggggtaagct ttgctatgta  
53581 tgaattttat gctaaacaat gcggtgcaaa atgttataaa actcaaagta tcaactatga  
53641 tttatccgaa tttaaaacac tttatgaagc acataaagat gagattgaga tcatattctt  
53701 atgtttgcct aacaatcctt tgggcgagtg cttagatgca aacgaggTgc ttgaatttat  
53761 acgcgctatt gatgagaatt gtttagtgat aattgatgca gcttataatg aatttgcaag  
53821 ttttaaagat caaaacaat atctaaagcc ttgtgatctt gtgcaagaat ttaaaaatgt  
53881 gctttattta ggaactTTTT ctaaacttta tggattgggt gggttgcgta taggttatgg  
53941 tatagcaaat gcagaaatta tcagtgcatt ttataaactt cgtgccctt ttaatgtaag  
54001 caatttagca ttaaaagcag cggttgcggc tttgcacgat gaagaattta ccaaaaaaac  
54061 tttggaaaat aatttttctc aaatggagct ttataaggaa tttgccaaaa aacatcgTat  
54121 taaattcatc gaaagctata caaattttat cacttatttt tttgaggaaa aaaatagcac  
54181 agatttgtct gaaaaattgc ttaaaaaggg tataataata agaaatttaa aaagttatgg  
54241 tttaaatgct atgagaatta ccataggaac gccttatgaa aatgaaagat tttttacaga  
54301 atttgaagaa attttaaaat aggcttgatt ttttaattaa aatggtttat tttgataata  
54361 tttagaatta aaataggtga aattcactaa actaagggat gagaattaat ggattttaaa  
54421 aatatgcttc accaaattgg gcaactttat caaaatttga ctcggaagca acgcatagtt  
54481 attgcagctt ctattgtcgt agttgtcggA tttttggtat ttttggcact atttcgtgga  
54541 agtggcagta gtgctaataa tggctatgct gttttagttg ataatgttga tccaagttct  
54601 tctgcggcta ttgtggctaa acttgaacaa aatagtgtgc cttatatact agaaagcgaa  
54661 agtaaaattt tagttccaca agatcaggta tatcgtcaaa gaatgtttat cgccagtgaa  
54721 ggattgataa aagatagccg tgtgggtttt gaagcttttg atacgcaaac tttcggagct  
54781 acaaatgaag acaaaagagt aaaatatcaa agagctatag aaggagagct tgcaagaaca  
54841 atcgaaactt tagagcctat acgcagtgca gtagtgcata tagcttttcc aaaagacagc  
54901 gtttttactg aaagacaaat tcctcccaca gcttcagttg ttgtaaagt acgtgagggc  
54961 ttaaagctta ctagaaagca aatcgatgga atcaaaaaca tagtttcagc tgctattcca  
55021 aaattaacca aagaaaatgt aagaattagt gatcaaagtg gtgtgccttt agatgagcaa  
55081 gaggcttatg aagatgattt ggttcgtgct caaattaaat acaaaagtga tcaagaaaga  
55141 gctttagaag ataaaatcat agaaaacttta gctccttatg caggaggcac ggataaggta  
55201 agagtaagtg tcaatataga ttttgacttt tctaagcaag aatcccaaag tgaatttat  
55261 gatccaaatc ctatagtTcg aagtgagcaa actcttaatg aagagagaac aggtagaaaa  
55321 gaacctgaaa ttcaaggTgt gccaggtgcg gtttcaaata taggtccagT agaaggactt  
55381 gataataaag gacaaatcga tacctataag aaaaaccaag tcactacaaa caatgagctt  
55441 tcaaaaacta taacaaatac aaaaaaaca tttgcaaccg ttgtgcgcac ttcagcagcg  
55501 gtaacaatag atggaaagta tcaagatggt gtagatgaaa atggagatgt gaaaagtGaa  
55561 tatgtccctt taagcaaaga agagcttgca agtgtggaaa gtatagttaa aaatactatt

55621 aatthttagtg ctaacagagg ggatagtgta gtagtgcaaa atttaccttt ccatcgtgag  
55681 tctattagag tggaaagtaa agttaaact ttctataatc gttttatcga accatthttt  
55741 ccaccggtta aatathttat tgcggctatt ttactthttta thttttacaa aaaaattatt  
55801 gctccatthtg cacaaaaaat gcttgaagat gttgcagcac aagaagaagt gcagcagggt  
55861 ccaagtgtcg thtttagatga tgctgaggat gcgttagaga aattcaatgc cgctaggaaa  
55921 aaggthgaag agcaacttgg cthttggggag aatthcaatg aagattctat ccaatatgaa  
55981 gthttacttg aaaaattaag aggcttagta agcgataaga gtgaagaaat tgcagcactt  
56041 ttacaaaact taatccaaaa tgataccgaa thttggtgaaa aggatatgtg atgataaac  
56101 ttagtgaaga acaaaaaatg gthttatgat atthtatcga gcctgaaaag gtagcगतat  
56161 thtctataca actthggcgaa gatgcaacga cthtcgthttt thcacatatg gaaattgatg  
56221 thattactga aatthcacgc tatattgcta tggcaaaaa thgttgaccgc gccgtagcta  
56281 ctgcgthttt ggaagaatth tatactctgc thcaatcaa tcaatacatt aaaagcgggtg  
56341 gthttggaata tgctaaagaa atactthttcc gtactthttgg thcagaaatt gccataaaa  
56401 thcttgaaaa actthacaaa agtatggaaa ataacaaaa cthttgcttat thggctcaga  
56461 thaaacctca gcaacttgca gactthtatca caaagaaca cccacaaact atcgcactta  
56521 thtttagctca tatggattca atccatgcag ctgaaacctt ggagtathtt agtgatgagt  
56581 taagagctga agthgttata agaathggcaa atctthgggga thtttctca agtatcatta  
56641 aaagagtatc tgcagtgtt gaaagcaaac tcgaaagtct tactthttat aaagthgaag  
56701 tgggaggccc aagagcagth gcagaagtac thaatcgctt aggacaaaa gcaagthaat  
56761 ctaccatcac thtatcga caaagtgatg agcgtthggc tgaaacgatt aaagaattga  
56821 thgtthactth tgatgatata caaaaactta gcactcaagc tataagagaa atthtaaaag  
56881 thtgcgataa acgcgathth atgataggct thaaaggcgc aagcgaagaa thaaagcaaa  
56941 aatthcttagc caacatgtct acgcgtgcaa gcgaagctth cthtgaagaa atgggcttht  
57001 thgggtgcggt gcgtgtthaa gatgtthgaag atgccc aaag thaaagthgt gaagthgtgc  
57061 aaaaactthgc agaacaagga cthtgtgcaa caggcgatgc tgatgaaatg atagagthgg  
57121 thagthgatgg thaatcgtag thaatgttatt thcaggaggaa cthtctgatca gcathgttht  
57181 gaaggatatc gththtaaggt aatthcagaa thtgataatc atacagaaga gaagcagcat  
57241 ccacaaatth caaatgaaga thaatagtgcg gctthtcctt caaaagatga aaatcctata  
57301 aatgaaagtc aaactcctgc acctthctca gtagtgcaag aggtthcaaac thctgcatht  
57361 cagcctagth thgtthgaaga thttgctaaaa aaaacagatg aathgtcaag thaatatcatc  
57421 aaactthcaa tgcaaattga aagtcaagaa aathgathth acaaccgctt aaatthcagag  
57481 cthtgaagth ctaaggaaaa atththcaaa gaggtthtat agcaagctaa agccgaatth  
57541 gaaaaagaat tgaatgact gcgtgataaa tactthaaaa thgtththcaa gctagaggaa  
57601 gctthgtgtaa atctthatac ththattgaa aaaaacgaaa aagagctthgc tgatacagct  
57661 atagatathc thaaagaagt caththtaaa gagctthgaa athaatcaag thaaatagct  
57721 thtgctthgg thaaagatct thattaatgag cthtaagggtg caggtthctat cgagataaaa  
57781 gthaaatctg thagattata thaththaaa gagcaththta gcgaaaatth thcatathaaa  
57841 atcactctth atgacgctat thagcaagggt agthgtthata ththtaagthga thagcggcaat  
57901 atagaatcta atththaatgc acgtctthatt aaaaatcaaaa aathggtthaa thaatgaatga  
57961 aataaththaa aaagathatc aatthgtctta thaccaagaa caathgaaa agcthaatth  
58021 aaccagctth gaagaththgg cggctcगतat thagagaaaa atthattgatg thgthaagthaa  
58081 aathggagga cactthagct ccaaththggg agcagthtgag cthtactatag ctatgcatac  
58141 agthattthgat aathgggtag atcctctthatt atthcgatgta thcacatcaat cctatacaca  
58201 caagctthth agthgaaaag aaaaatgthtt thgagthctthg cgtcaatthg thggactcag  
58261 thgatatacc aagcctaacg atggggatha thttthtagca ggacactcaa gthactthctat  
58321 atctthtagcc gthaggacct gthaggctat agcaththaaa ggtgaaaaac gcactcctgt  
58381 agctththata ggcgatggag cththaaagthgc gggthatggct thatgaggct thaatgaatt  
58441 aggagathct aaththctth gtgthagthcat cththaatgat aathgaaatga gcaththcaaa  
58501 acctagthg gcgaththcaa aatacctthc thcaagctatg gcaacgcagth ththatacaaaa  
58561 ththcaaaaa cgcgtggcta aathgtthaga thgcctthacct gaththctgcta cththattggc  
58621 thagcgtthth gaagaaagth thaaaththaat aactthcagga cthththattg aagaaththggg  
58681 thctthgagth atagthcccta thgatgggca thaththaaagc gaggtthatt thctgaththaa  
58741 acagthcaaaa gctatgcaaa aactthgtat thatccatgca caaacctthaa aagthaaaggg  
58801 ththagthth gctgaaggaa aaaaatgctha atggcacggg gthtagcctth thgtatthgga

58861 tagtggagaa agcattaataa aacctgatgc taaaaattct gcaacagaaa ttttttctaa  
58921 ggtattgttt gatttggcta caaaatataa aaatatagtt ggcattactg ctgctatgcc  
58981 aagtggaaca ggacttgaaa agcttataga gcaatatacct gatcgttttt gggatgtggg  
59041 tattgctgag cagcatgctg ttacttctat ggcggctatg gcaaaagaag gatttaaacc  
59101 ttttattgct atatacagca cttttttaca acgcgcttac gatcaagtta tccatgattg  
59161 tgcgattatg aatttaaagt tagtttttgc tatggatagg gcaggcatag taggagaaga  
59221 tggagaaaca catcagggag tttttgatgt gagtttttta gctcccttgc ctaatttaac  
59281 cctttagct ccaagagatg agcttatgat gaaaaatatt atggagatg cttatatcca  
59341 tgagggatgt ttggcttttc gttatcctag aggatctttt attttagatg aggaatttaa  
59401 tccttctaag atagaacttg gaaaagcgca atggcttgta aaaaaccaa gcaatattgc  
59461 ttttttaggt tatggacaag gcgtgggcaa ggcttggaaa gttttaagaa aattacaaga  
59521 tgaggggcaa aacgctaatt tgattgatct aatttttgct aaacccttag atgaactact  
59581 tttaaaagag ctagcaaac agagtcaaat ttggtttgtt tttagtgaag atgcaaggat  
59641 aggcggtgta gcgagtttgc tagagagttt tgtgcagaag aatgatttga aaatcaaat  
59701 tgtttctttt gaatatgaag ataattttat cgaacacggt aaaactaatg aagtggaaaa  
59761 agctttaaaa cttgatattg atagtctagt acaagagtg aaaacaaatt gagtcaatag  
59821 cattctttta attcgaatca aaacaataaa gaatgcttaa attttcacag cttcttatta  
59881 tctaataaaa aatatcattt gatataaact tcttttaata aaaaatttat tattattctt  
59941 agttaaaaag aactaggata aaagaatgga attgttaca atacttaaaa aacacgaact  
60001 gaaagcaact cctcaagac tgtgtgtttt aaaaatttta aaaagacatg aacatccaaa  
60061 tattgaagag ctttatgagg aaattaaaa agaatatcct tctatttctc ttgctacggt  
60121 ttataaaaaat cttataacct tgcaagaaca aggcttggtt gtagaaatca atgtggcaaa  
60181 tcaaaaaact tgttatgata tctatgaaga aagacatata catatcattt gcagtaaattg  
60241 tggtaatatc gaagatatga gttttcaaaa tgctgaactt gatgaatatc aagaaaaatt  
60301 agagaaaaaa atgggaaata tcatcgatca tttagcagtt tgtgctcatg ttagcacttg  
60361 taaaaagtgc cattaagcaa aataaagtta aaataaccca aagaatttaa gggttatttt  
60421 aatggttcat gaaattcaga agattttttt acttcctgat gctactcttt tagaaaattt  
60481 acaaaaagat ggaattgttt ttgaaattta tgaattgaa acattctata ctaagataac  
60541 acatttttat gatgtaaaat ttcaaatct caatggaaat ttttcaaaa taaccgatt  
60601 aaataacccg attttagagc aaaatcaaga agaaaagatt tctaaaaagg attatgaaaa  
60661 agctcgtaaa aaactcatag aaaaaagcat caagaaaaaa cgctatgaat ttaaactttg  
60721 ttcttttaaa agctttattg atgtatatga agatcttaat ctatatgttt taaaagtfff  
60781 tttccaact ttggagatgg caaatctttt tgcaccgcct aaagaattta aaattcaaag  
60841 agagctttgt ggagttttgg attctaaaaa tataatactt tatggtttta acaatttaga  
60901 aatagatatg gaaaaatgct ttaaaattat agaaaaaat cagaacttta ccctagattt  
60961 tccaagttct attttagctt ttgatggata tagaattttc ttattttatc tatttagaaa  
61021 attaaaatta tattggaatt tgaccttaga aaatagacaa agagagaatt tttgtgaatt  
61081 tttttcttat gcgagaaaaa tttatattat tttaatgagt acagaagaaa tttttgatga  
61141 agagttaaat aaaaatttag ctcttagatt tgaagactta gtgaaacaat ctcattgcat  
61201 ttttagcaaac aatgaactag gtgaaaattt acttttattt ttaagcagcg aagaattgca  
61261 aaatttattg agtgattttg atttttttat caaagaagat tcgttttata agggcgagca  
61321 agaaaaatat ttttttaaac aaatgattgc catacagcta agaaaaagac ttgtattggt  
61381 taagaaaaat ttattgaaaa attttgaat cgaaattttt gaagagaatt ttttagagct  
61441 ctcggttttt ttagaatatt ttcataattt atataatttg aaaattttga gtaaattata  
61501 taataaatat tttatttgcg attttgaaaa aaagatgctt ttaaaattaa ccaagaaaaa  
61561 agaaaaactt ggaaaattaa tccataaagc aagtaagaaa ttgaaaattt ataaaggata  
61621 ttaatgcaaa agcaagataa aatcataaaa atgtttaatg aaatagctcc gacctatgat  
61681 aaggctaata gaatttttag ttttgggtgtt gatgtaagtt ggcgtaaaatt tgcttgtaaa  
61741 agagttttta agctttacca aaaggataat ttaaacatag ttgacgtggc ttgtggcaca  
61801 ggagatatga tagaaatttg gcaagaaagt gcgaaaaaat taaataaaaa tatagcccac  
61861 atcaaaggta ttgatccaag tgagggtatg ttaaatatag caaaacaaaa attcccaaat  
61921 atcgaattta tagaagctgg agcgcaagaa ttgcctttgc aaagtgaaag tgttgatc  
61981 gtaagtataa gctatgggat acgcaatgtg gtggagagag aaaaagcctt gagagaattt  
62041 tcaagagtgc ttaaacaaga tggaaatttt gtagtttttag aatttactaa aagagaaaaa

62101 ggaggttttg tagcctcttg tagggatttt tatcttaaaa atatthttacc aagcttggga  
62161 ggaatgataa gcaaaaataa aagtgcatac gaatacttgc ctaattctat agaaggtttt  
62221 ttaagtaaag aggaatthtat cgccgaactt aaacaggtag gttttgaaat gcttgaatth  
62281 aaaagtttta gtttcggcgt aagttctatg tttatagcta agaaagtcta aaatthtagac  
62341 tttctaattct tttttattaa aaggggtatt agtataatta gcacagctcc tatcagtaaa  
62401 ctttgagcta tgatcccact ccaaagtatt gaaaaatctc cattactgat agataaagct  
62461 cttcttagat tggtttctaa ttgttctcct aatacaaaac cgagtataag tggagccatt  
62521 ggaaattcaa gttttcttaa aaaatagcct aaaataccaa taattaagat taaaatgata  
62581 tcaaaatcag tactattgat agaataaaca cctataattg aaacaattgc tataattgga  
62641 gccaaagctcc acataggtat gcttaaaatt tttacgaaaa ttcctacca gggcaaatc  
62701 attaaaagta aaattacatt tgcaataat aaggaagcta taagtccca cactatattt  
62761 acttgatcag taaacattgt aggacctgga gtaatattat aaagtgttaa tgcgccatc  
62821 ataaccgcag ttgttcctga acctggaaga ccaagtgtta acattgggat aaaagaacca  
62881 caggctgaag cattattagc tgcttcaggg gctgccacac cttthaaatc tccttggccg  
62941 aatthaccct tttcaccggc taththththt tcaactatata aagtaatggc actagctata  
63001 gttgctccag caccggtaa aactcctaca aaaaatccta taatagagga tcttataatg  
63061 gtccaaaagc aaaagaagaa ttctttgata tttacaaaa tcttacctgt tttattaatg  
63121 atgttttgac ttgtttgagt atgctctaac attagaaaa tttcactaac agaaaaaagt  
63181 cccattacta aaacaacaaa agaaattcca tcatataaat gtggactatc aaaagtaaag  
63241 cgataaacac ctgtatthtc atctatacct atagtgtttaa aaaaagtcc tatcaaagct  
63301 gatagaaaag atcttatagg tththgggct aacatacttc ctaaagtgtc taaaccaaag  
63361 acaataagag caaaatattc agcaggacca aatthtaacg accattgtgc aataagtgga  
63421 gcaaaaagta taataaccga aattgctata aatgaaccaa taaaagaact aagagctgag  
63481 atgctaagag cththctgc ttgaccttht ttagccaaag gatgtccatc taaggttgtc  
63541 ataatagctg ctgcatctcc gggatthcca agtagtatgg aagaaattct acctccatat  
63601 tcacaacca tataaacctg tgcaagtaaa ataattgcgg attctgcagg taaattcatt  
63661 gcaaaagcta gaggaagtaa aatggctact ccattaatgg gtccaagtcc tggagcata  
63721 cctacaatag tacctataaa acaaccgatt aaggctataa gaatattata aggatctaag  
63781 gctatgctaa atccttgcat taaatacatc caagtatcca taaatthctt ttaatthaaa  
63841 attatcaaat ataaaaccaa acggcaaagt aatthgcaat aaagtattaa agagatagta  
63901 taaaataata ctacttgaga tagaaaaaac aatagcttht attaaagttg ccccaaaaag  
63961 taaagttatt gtaaaaatta aaaagattgt gcaaatata aagcctaaaa actcaaaaa  
64021 aagcgcataa atthaaaaag ctaaagttaa aacgatgagc tththcmeta gaataaaatc  
64081 acccattta acctagtat cttcagagaa aaaaacaaga aatatagaac aaagggcgat  
64141 taaaatthaa gtacctactg gaaaaggacg cggtcctaag ggctcataat taaaatctga  
64201 atgtatattc caccctatgt aaattccaat taaacttata accaataaaa tccagcgcac  
64261 aatthctata cttgacatga tththacttht taagatcgaa tththtggcc aaaatthctgt  
64321 attgatcagt ttgtthththt acaaaatctt ctaactcttht acctthththt tcgaattcaa  
64381 atagagatct ttgtthththt tgatctththt attctthgggt ttgtthgaaat ttatcaaag  
64441 catcaagcca ccaattataa gcttctgtctg aaactththt ccccatatag taagctctaa  
64501 ttactggcca ttctacctca taacccaatt cththtagcgg tggaaatattt gctaaagtgc  
64561 ccggaagtct cththggggaa aagatagcca atactctaat agttctctgtt tcgatttgag  
64621 gtacaagttc agctatgcct gcgctaatac catcaatatg atthctctaaa agagaagtta  
64681 aagcatctcc tcctccttca aaagctacat agcgtatctt tththacatcg acattaatag  
64741 tththtgcaag taatgctgtt tgcatccagt cttgtcctcc tattgaaact cctgcacct  
64801 tactaataga atthgggtct ttatgcaagg cattthattag atctthctaaa tththtataag  
64861 gagagtctga tthtgacggct atcattccgt aatctacacc cgctgaagca agccatttga  
64921 cattatththt attataththt ccatgththt ctgtggctat attcagtaat gtcccacttg  
64981 aaaaagctac aacaacatta ccatctthtag atctattatt aacctagtg ttataagcta  
65041 caacacctac tcctccgggc atataggtaa ctctcatagg agttgaaata atgttagctt  
65101 taagcatacc tacttgaatt agcttacctg ttagatcaaa accgcctcca ggttgagctg  
65161 gggcaataca ctcgggacgg ttaggttctt tagcaaaagt taacgaaaa ccaaaaatca  
65221 aaacagaaca aaaaatththt aatthcatga taaaatctt taatthththt gttthgaaata  
65281 tataagtatt atataaatc tthththththt aatthtactat tththtataaga taaagattaa

65341 aattccttaa aaaatgtaac tttattatac aaaatatagt taaattgata ctttttgtaa  
65401 tactttatat atggaaaatc atgaaagtaa gcgaattaa tttaaaagct aaggctttat  
65461 tggaaacaca ttttaatgat attgttttaa gtggagagct ttcaaaaatc actatgcatg  
65521 gatcaggaca ttggtatfff gatctaaaag atgaaaaatc aagtatagct tgtgctatgt  
65581 ttaagggcgc aaatftaaaa gttgattttc aacctaaggt aggtgatttc ttagagcttg  
65641 ttggaagtgt gagtttgtat gctgaaagtg ggcgttatca atttattgca aacagtatga  
65701 aaaaagcagg aatgggagat ttagaggctc aatttctagc attaaaagag cgcttgcaaa  
65761 aagaaggttt gtttaacagt gaacataaaa aaactttgcc tcaatttcct aaaaaatag  
65821 gaatcatcac ttcaaagact tcagcggcct tgcaagatat gttaaaactt atcaatcaaa  
65881 aagaatattt tctagccaaa atttatgttt ttaatgctgt tacacaagga agtagtgcgg  
65941 cttattcttt gattcaagct ttaaaaaaag ctgatgaggt gggattagat gttatcatta  
66001 tcgctagagg gggtggtagc agagaggatc ttttttgttt taatgacgag ggtttggcaa  
66061 gggaaatfff taaagctaaa acacccatca tttcagcaat tggctatgag attgattatg  
66121 tgatcagtga tttttagctt gatttttagag cgcccactcc atcggctgct atcgatacct  
66181 tgctttattc tagacttgat ttagaacaag gacttgatct tttggaagaa aaattgacaa  
66241 aactttggga aagtaaatta gaatattgtg aaaatttact cagcaatcta cataaatttt  
66301 ttaaagcaaa atcttttagaa actatgatag aaacaaaaga aaaacagctt gcgtttttgc  
66361 ttaagcaagc aaaaatcgta atggaaagca aaattcaaaa agctgaattg gaactacaaa  
66421 agcttcaaaa tgcttttttt cagcatgaaa atttttttta aaaaagtaaa aatctaattt  
66481 ctattaaaaa aaatggtaaa atagcaaat tagaagagct aaaaagtga gatatcatca  
66541 ctttgagttc tcaaacftta caaaaagaag caaaaattct ataaggaaaa ataatgagaa  
66601 aaattaatft tagcgcaggt ccatctactt tgcttttaga gcttttagaa tatgctaaaa  
66661 atgagctttg tgattatcag ggtaagggct attccatcat ggaaatttct caccgttcaa  
66721 aggtatttga agaagtgcac tttggagcaa tgcaaaaagc aaaagaactt tatggtttaa  
66781 atgatgatta tgaggtttta tttttacaag gtgggtgcgag tttgcaattt gctatgatac  
66841 ctatgaattt atcttttaggt ggggtttgtg agtatgcaaa tacaggagtt tggactcaaa  
66901 aagctataaa agaagctcaa attttaggag taaatgtcaa ggttgttgct agtagcgaag  
66961 aaagtaagtt tgatcacata cctcaagttg agtttagcga tagtgctgat tatgcatata  
67021 tttgttcaaa caataccatt tatggcacac aattftaaaa ttatcctaaa accaaagctc  
67081 ctttaattgt tgatgcttcg agtgattttt tctcaagaaa agttgatttt tcaaatattg  
67141 cactttttta tgggtggagt caaaaagaat caggaatttc gggcataagc tgtcttttta  
67201 tacgcaaaga tatgctaaaa agatctcaaa ataaaaactt gccaaagtat ttaaaatact  
67261 ccatacattc acaaaatcaa tctttatfta acactcctcc gacttttgca atfttatatgt  
67321 ttaatcttga aatgaaatgg cttttagatc aaggtggatt ggatgctatc gatgctaaaa  
67381 attctcaaaa agccgcaatg ctttatgagt gtattgattc aagtgaagga ttttataagg  
67441 ggcatgctga taaaaaagat agatctttga tgaatgtaag ctttaacatc actaaaaatt  
67501 cagaacttga accgatattt gtaaaagaag ctgaaagaagc tggatatgfta ggactftaaag  
67561 gccatagaat tctgggagga attcgcgcaa gtattftataa tgctgttagc ttagatcagg  
67621 ttaaaactft gtgtgaattt atgaaagaat ttgctaaaaa atacaactga taataaactt  
67681 tctgccacac tttgtatgaa cttcattcaa agcaggcaga aaattaacat atataaagtt  
67741 tttcagtatt taaatagata gtataaattt acacatatt agaagtftaa attcaggact  
67801 ttaggagaaa ttctcaccac caaattftaag caaggcagaa cccaagfta aaccaccacc  
67861 aaaagcgtca agcaagatca aatttcctft tftaagacga cttcttcat aggcattcatt  
67921 cattgccata gggatagaag cagccgaggt attaccatac ttgtgtacag ttacaataca  
67981 tttttcatcg cttaaattga gtctctcttg cacagctttg atgatacga aatttgcttg  
68041 atgtgggatg aaaagatcaa tttgttcggg taaaattfta tttttagata aaatttcaac  
68101 gacatcgttg cttaaagttt gcactgctat tftaaaaact tcattacctt tcattttcat  
68161 cgccaagctt gaagcatctt ttgattcttg agagcgttct gtcattagta aatcaccata  
68221 atttccatta cttgctgtat gtacatcgat tataggatta ttttcatcaa gacttacaac  
68281 tccagctcct gcaccatcgc caaaaagtat acaaaactft ctatcagtat aatccatgat  
68341 agagctagct ttttcagctc ctataattaa aacattfttt tftaatccgc tttctacaag  
68401 agcttttagct tgttctaaaa gatagataaa gcctgagcag gctgctgaaa tatcaaaagc  
68461 agtgattcca ttgagtccta aatttgcgcg aattfttcaa gcggttgagg gcatggftaa  
68521 ataactaggg cttaaagtag ctaccaatat cgcattcaata tcttgaggtt ttaatttgc

68581 tctttctata gcttttatag ctgctttggt acctaaatca cttgtgtttt catctttgct  
68641 tgcaatacgt ctttctttta tacctgtacg tcttgtgatc cactcatctg ttgtatcgat  
68701 aatcttttca agatcataat tgcttaaaat ttgctcaggt acgtaagaag ctatgctttt  
68761 taaacttgct ttaggcattg ttttctcaa gtccttttc tattatttga ttgatgtttg  
68821 attcactaaa gttaatagcc tgaaaaatag catttttgat tgctctagca tgcgttttcc  
68881 catggcttat aataacacag ccgttaatac caagcagagg agcaccacca tattcttgcc  
68941 aatcaatatg ttttttaagt cttttaaatg aaggtttcat tagtaaagca cctatttttg  
69001 atactaaaga ttgcttgatt tcatttttta aaatttgat aattgctgta gctacacctt  
69061 cgcaggcttt taggattaca tttccatcaa atccatcaca aactaagata tcaacttcac  
69121 cattaagat atctctacct tcagcatttc caataaaaact aggaatttgt tttataagtt  
69181 gatgggcttc ttttgtaagt tcattgcctt tgcattcttc ttcgccattg gataataagg  
69241 ctaggcgagg ttttgaaatt ttcataattt cttttgcgta agcatctccc attatggcaa  
69301 attgaaacaa attttcggct ttacaatccg tatttgcacc tacatctaaa aacaaagttt  
69361 tgcttacagt atttggcatt aagggtgcaa tgcgaggctg taatattcct ttaagtctgc  
69421 ctaactttaa gggtgctaaa gacatacttg caccactatg tcctgctgaa acagcagctt  
69481 ttgcttttcc atttctaaca agttc gatgg ttttataaat tgtagtttct tttcttttta  
69541 aggcattctgt tgcattttca ttcataagaga aaacttcatt ggcgttttca tattgaatgt  
69601 attgttttaa atttttagggt attagaggct ctaaaaatag gggatctccc actaagatag  
69661 cgttaaaagg cttttctttt aaggcctcaa taacaccttc tataatgggt ttttctccga  
69721 aatctccacc cattgcatct atagcaatgc taatcattga ttttagtatt ctttagtatt  
69781 tggatttgca cgatgaggca ttttatagct tccatctttg tcttttatag gcataggaag  
69841 acttacttta tagtgagttc tacgttttgc tgcgaggtt ttactcactc ttctcttagg  
69901 tactgccatt ttatctcctt ttttaaaatt tgtttagcttt tatttttgca attattgcaa  
69961 taaaaataat cacttaaata agcttcaagt tcgctcactg caacttctat taaatcaata  
70021 tgaccatcaa aaaattcaat ggtattgctt aattcatttg tattatcttt aaaaatacca  
70081 tcacttgcaa aaagatctaa gtcttctttt atttcaagtt caagttcttc accacagcta  
70141 tcacaaggct tataaacaaa accttgcaat gtggatttta ttttaacaag tttaggattt  
70201 acttttacta aatttccttc aaaaacaaca ttttcaaggt tgagttttaa aggatagttg  
70261 gtattgttaa tcctagaaaa ggctattttc attagcaaat ttcgttagat ttaaagaaaa  
70321 attcaatctc aatttttgca ttttctaaac tatcgcttc atgaacagca tttgcatcaa  
70381 tactttcagc aaaatcagct ctgattgttc cagggttgcgc ttcttttggg tttgttgctc  
70441 ccattaaatc tctattttta agaacggcac cttcaccttc taaaacagaa accacaacag  
70501 gaccactgat cataaattca actaaatctt taaaaaaagg tctttcttta tgaacagcat  
70561 aaaaagcttc agcttgctct ttactaagtt gaactttttt catagcagca attcttagtc  
70621 cattactttc aaaacgatct aaaattttac ctataacacc tttttttacg gcatcagggt  
70681 tgataatcga tagggttttt tccattgttg attatactcc ttggttttta taaagcttaa  
70741 aattatactt gaatttgttt aaaaaaagtt aaaaagaggc tagcttttta actagccttt  
70801 tgtagaatta tgcaaaaact ggaatagttc catctctcat atcgctaccg atattgtcgc  
70861 gacttggttg acctgaagca atttcgctcc atactataca gccatcagtt ggacatgcac  
70921 ttgcacaggc tggttgatca ttgtgtccca cgcattcaac gcatttgttt gcataaacat  
70981 agtatctatc ctcaccctct gggttattag catcatcaac gatagcacta actggacatt  
71041 catcgataca agaaccacaa gcaatacaac tatctgtaat ttttacagcc attttatctc  
71101 ctttttgatt aactatgaaa tttacttttt caattaagca ttttatcaaa gtattcttaa  
71161 aaaactctaa tcttgataat caaaaaatag atataattga taatttttag attttgatta  
71221 ttatttttatt aatttgatta aattttgtaa aaaatatttt taaaaattta ttatcattta  
71281 aaaatcttta aaggatttaa acgatataat ttcgccatca ataaaaattta ttaattagga  
71341 gaaaacatga tagttacaaa aaaagcttta gattttactg ctccagcagt attaggaaat  
71401 aatgaaatag ttgaagattt taatctttat aaaaacatag gcccaaaagg tgcagtagta  
71461 tttttctacc caaaagattt tacttttggt tgtccttcag aaataattgc ttttgataaa  
71521 agatatcaag aatttaaaaa tcgtgggtatt gaagtaattg gaatttcagg cgacaatgaa  
71581 ttttcacatt ttgcttgtaa aaatactcca gtaaatcaag gtggatttgg tcaagttaaa  
71641 ttcccacttg ttgcagattt aactaaacaa attgctagaa attttgatgt actttatgca  
71701 gaagcagttg ctcttcgtgg ctctttcttg cttgatgcag atggaacagt tcgccacgct  
71761 gtagttaatg atttaccact tggagaatg attgatgaaa tgattagaat ggtagatact

71821 atgcttttca ctaacgaaca cggcgaagtt tgccctgcgg gttggaataa aggtgatgct  
71881 ggtatgaaag ctgacctaag aggtgttgct gagtatcttg acaaaaacga agataaacta  
71941 taataataag cccttataaa aaagggcttt tcttcttact aaaatttctt cttttgattt  
72001 taattaaaat tcattatfff tttatataat tttatctaaf tttacagact taaatttagg  
72061 ctaattatgg caggtgaaga tcaagaaaaa accgaagaac ccacgtccaa gaaaatagaa  
72121 gacgcaagaa aagaaggtaa tgtccctaaa tccaagacg cagcagctat tgttactttg  
72181 atagttgggt ttgtgattac actttttatg atgggtttta ttggtgaaag aattactaat  
72241 ttatatagat attaccaaag ttttataggt gttgaatttg atttgcgtat tatccaagct  
72301 atcatgatta aaagtatfff tgaagttttg attttactag cacctatagt tttaaagtatt  
72361 atgattgcag gtatfffagg caatgttatg cagtttggtt ttatfffac gactaaacct  
72421 ataatgccta atttagggaa gatcaatcca ctgaagggtt tgaaaaattt attttcttta  
72481 aaaaagcttg ttgagagtgt taaaattgta cttaaagtag gagtggattt tactatagct  
72541 tttattgtgc ttttaaaatt tatgcaagaa ttaccactgg ttgagcgtaa taatatcatc  
72601 gggcagctca tttggcttag agatagggct atcattttag cggccattgt gattatagcg  
72661 tttttagtga ttgctgtttt ggatattfff ttggtgcgtt ttcagtattt taaaggtttg  
72721 cgtatgagca aacaagaaat taaagatgaa tataagcaaa tgggaagggga tcctcaagta  
72781 aaaggaagaa ttcgtcgttt gcaaatggaa gcagcgcgcc gccgtatggt tcaagatggt  
72841 gcaggagcgg atgtggttat tacaaccgg acgcattatg ccgtagccat tcgttatgat  
72901 acaacaaaag agcaagctcc tagagttgta gctaaagggg tggattfff ggccttctgt  
72961 ataaaacagg ttgcttatga taataatggt gttgtttatg aaaatccacc tttagcaaga  
73021 gagctttata aggcttgtga tattaatgat cttatcccta gggaaatggt taaagctgta  
73081 gcagaggtgc ttggatttgt ttataatacc aacaataaaa gtcgttttagc aggacaagtt  
73141 aagaaaaata gttaagcaaa taattttcat tatttgcfff tttcaataag atcaagtact  
73201 gatcgttttg catcgtttat tttaatatct actttaaaat aaatttgcac tctattgttt  
73261 tctaaagctt gtggatttcc attgatagga ttgttttagtc catagctfff aaggttgata  
73321 tttttggtgc tctctccacc ttctataagg tattttaaaa cattttccgc tcttgcataa  
73381 cctagatcat agcttcttaa agccgagtcg ctattgtcag tgtaacctct gatttcaatt  
73441 tctatttgag gaggtaggta tgaataaagc tgggcaatgc gtttgagata atcttgaata  
73501 tctacagata ctatttgtgc actccctctt tcaaatcaa ctttagaagg taagttaagt  
73561 atttcttgat tttcagattg atcaagagcg gcttgaagtt ttttaataac ttcttgttga  
73621 tttgcagtca tttgtttaag tttgcttaac tcatcttctt tttcttcttg agagccctta  
73681 tatttgtaag tatcttgcgt ttcttgttgt acggtttgag ttgcagtata atcaaagatt  
73741 tttacaaatt cggtttttag tgcttctact ttagcgggat tagttttaga tatcgcccaa  
73801 agagcaataa aaagtgccaa aagcaacta agaaagtctg cataaggcac agcccatttt  
73861 tcaccagcag gacattcagg acatttatgt tttttagcca tgattaacct ttatcaaatt  
73921 gtgaaatfff tggatcatca tgacttaaaa agttaaaaag ttttgcttct aagtctctag  
73981 gattagcccc ttctgctata ctttaaatcg cttctgttat acaatttgc tcttttacia  
74041 gatccatacc atttgctttc atttttcttc cccaaggggc aaaaagtgca taggcgcaa  
74101 aaatacctgt aaccgtagct gtaaaggcgc ctgaaatacc tgctgccatt gcttgaggat  
74161 tatctagaag tttaaagtcc aaaatcaaac caaaaaccgc ccctactagt ccatagtag  
74221 gacaagtttc accaaaaatt atccaatatt ccgcacattc tttatagtgc tcttcaagtt  
74281 gttcagtttg aatttcata ctttcatgaa tttcttcgaa gctttttcca tctactagca  
74341 tcatcatagc atttcttaaa aaatcgtttt cgatttcatt tgttcttgat tctagagcta  
74401 aaaggccatc tcggcgtgca atgattgcaa attcgataag ctgagctatt ctttcgggta  
74461 gatttacacc tgaaccttta aaaacgattt tgagttcttt ataggctgct tttacaattt  
74521 ttttatgagt tgaagtcatg gcacaaaaag ctgctgttgg cataacgatt agaaaagaag  
74581 aaaggtggat aacatgcaga ggatttcttc cctctagtat atctctact gagatactag  
74641 ttactgcaag aaccattccc aatatggttg aaagatccat taaatcactc cttgattatt  
74701 ttaaactgcc ccattttttg gcgatacttg agcttgtttt taattttacc ttttaattta  
74761 ctatattttc cataatatca ctagcttttt tcacaaaatt ttcgcataat tcatctttta  
74821 cttcaaagat aagttcatcg tgaatttgc aaataagtct tttatcttga tctaaaattt  
74881 tagcgatttc taacatggca aattttataa tatctgcggc tgatccttgc aaaatcgaat  
74941 ttatactttc tctttcgtac atagccactt gcatgggttt agcattttca aagtcaaaat  
75001 agcgtttgca cccacttaaa gtactaataa aaccattggc cttggcttca ttttttactt



75061 tttcaaaata acttttaatg ctagtataat tttcaaaata tttttctata taggttttag  
75121 ctaaattggc ttcaatTTTT agatttttac ttaaggTTTT ataaccata ccataaatca  
75181 agccaaaatt aatactTTTT gctatgcttc ttgtttcgta attactctcg ccaaatatca  
75241 ttatagcagt tcttgcatgt atatcctcat cgTTTTtaaa agcatttaaa agTTTTtcat  
75301 cttcactaaa gtgtgctagc attcgaagtt caatttgaga ataatacaaga ctgataaagc  
75361 taaatccttc tttggctaca aagcaggatt tataatcttt tgcataattgt ccatgCGCag  
75421 gaatattttg taaatttgga tccttagatg aaagacgacc tgtagcagta cctgTTtgta  
75481 aaaaactcga ataaattcctt gaattctcat cttttaaagc aagTTTTaac aaaggctcgc  
75541 aataagtcca ataaagctta gccagttctc tataatctaa aatttttagaa acaacaggat  
75601 gtttatctag gagttcattt aagactTTTT catcagtaga ataccctgtt ttacctttct  
75661 ttccgcttgg aagtttgagt ttttcaaaaa gtatatcgcc tacttgTTTT ggagaattaa  
75721 gattgaatct atcctcatat aaagtgtaga tttcttcgct taaaatttta atttcagatt  
75781 caaatttttt cataagaatt tcaagagcat gtgtgtcaag ttttatacca ttttcttcca  
75841 tcatcataat aatttttaatg aaatcaaat cgtaattttt cgcaagatca agcaaatgag  
75901 gttcaagatt ttttaaaaaa taaagataaa atcttagagt aatataagca tcttcagctg  
75961 catatttgca agctTTTTca agctctacgc ttgcaaaatt ttctcctttt ttaacaagac  
76021 tttcaaaatg caaagtttca taattaaaaa gccttagggc taaatcatcc atatttactc  
76081 ttagggaagg gtttttaagc catgctaaaa tcatagtatc agcatatttt tgtggcaaaag  
76141 aaagcttgaa attattttct atgattttta aatcatattt aagattatgc cctatgataa  
76201 aatgtttaaa aataagttct atagctTTTT tagcactttg taatgatact tgcttaccCa  
76261 cacctaaata attatgagta agaggtagat aaaaggcttc attttcgctc atgcaaaaac  
76321 taaatcctac aatttttgct tctttaacat caatacttgt agtttcggta tcaaaggcta  
76381 tgatactttc ttgatcgaga gaatttaaaa tttcaaagag ttgattttca tcttgataa  
76441 gagtagcttt aaagcctaaa tttttatctt tattatcggg gttttggcga agttttttaa  
76501 gcaagacatt tagctcataa tgctctaaaa tttcaagaac ttttaaaaga ggctcatctt  
76561 gtggaaaatc agctTTTTct aacaagttgc ttacttctaa atcctcatal aaagaagcaa  
76621 gttttttact aagaaaagca ttttctttac cttctagaag caatttacga cttctttcat  
76681 tgcgtactag agtcaaatTT tcataaatgc cttcgatact tccaaactca tcaagcaatg  
76741 ttttagcacc ttttgccctt atgcctttta ctctgggat attgtccgag ctgtctccac  
76801 ataaggctaa aaaatcttta atttgataag gtttaacacc gtatttttcc aagcaagctt  
76861 cctcatcata gtcatttttt gaaatagggc tataaatact tgttttacca ttctttataa  
76921 gctgataaag atccttatct tgcgttataa tgcgtacaaa aatatcttta tctttacaag  
76981 ttttaactac tgaagcgatg atatcatctg cttcataacc ctcgcaagag acactcatga  
77041 agccattttt ttctatcatt tctatgcaga ttggaatttg ttctaaaagt tccgggtgggg  
77101 gtgggggtgCG atttttttta taatttgat caatatcgct acgaaatgtt ttacccttag  
77161 agtctagtgc aaaaataata taatcacttt tgtattcggt ttttaagactg tagataaaat  
77221 tagcaaaacc gctaatacatt ccactagctt gcccttgaga atttttaaat cccttgaggg  
77281 catagtaaag acgaaaaaag aagccaaaag tatcgataat agttaaagtt ttcatggttt  
77341 tctttcttag tgggttttaa actattatcc caaaattcac tttaaagata gatgattttt  
77401 ataaagaatt agcgataaaa attataaaaa tatagcgact taatttgcca agacttatga  
77461 aaaaacaagc tttgatgaaa gggatttttg caaaaccaag gcctaaggca aagatatcgc  
77521 ctattaaggg taaaaaggtt aaaaaagcat aaatgcttc aaatttggtg aaatttgcatt  
77581 tgaatttatc aagctTTTTT aaagatttg aaataactt ttctaaaatt ttttctttac  
77641 caagataggc tagagcatag gtacttaagc ttcttaaggt attacctaaa gtagctataa  
77701 ataaaaccaa attagcatta aaatcaagtt ttatgaaagc tacaacaaag gcttcacttg  
77761 caagaggcaa aagcgtgctt gaaagaaaac atacgataaa aagccctaaa taattgatata  
77821 cattgtataa aaaatcaaac attaaaactc tttttacgca ttaaaatcaa taaaataaaa  
77881 agataaatag gcaaaacaaa aggcgtggta aaatccataa atttaaattc tgttaaaatt  
77941 gtacacaagc aagcacatat aaaaaagatt ttaaaaaggt gactttgaaa aaatttatct  
78001 aaaaacaaaa gataaattaa acaaacacca acatcaagaa atgccttgta ataccaaaaa  
78061 atactttctt tttgctctat accttcaagt aaattagcaa tagcacttat taccataagc  
78121 aaaaacaaa aaaaggaata aggtataaat ttttctttc tagaaatata aaagaaaaat  
78181 aaatgcacaa agaaaaatga tattgttagt aaaaaagcta aaatagaatg taaaaagcgt  
78241 aaattttgcc tcaaatgata aagtttttga tcagctaaat tttagcatttc aaagctttgc

78301 ggcggtgctt cataagcact ataatcaata attaaataat gattaaaaaat aaaaacccaaa  
78361 gcactctggc ttagacttat aaaaatgaca aataaaatac taaattcaaa tattttcttt  
78421 ttcattggat ataagcttta agtttgggat tttgttttta ctaagcgcga aagcaaatag  
78481 tgcgtaataa atggtaaata ataagcctgc aaataaaaaa atcataaaat gagcgataat  
78541 taaagcaaga gaatgctcgc tataaattag aacaaacata aatatataga taattatcaa  
78601 aatcgcactt ttgaaaataa aacaaagtgt aaaataaatc ttattttcgc ataaagtttt  
78661 taaagcctta aaaaatataa aagtgcaaaa aatggctatt gcaagacata aaaaagaaaa  
78721 gccatataga aaaatacgtata atctcttatc aacaacaaca acaggactag caataagata  
78781 attcaagctt aataaagcga taaattgagt aaatgcagct ataaaaaac tgatcaataa  
78841 aaccttgctt tgacttaca aataaagttt taaaatcata atcaaaatag aaattaaaaa  
78901 aattgcataa aaaaccatgg ctaaaatatt agtattagaa ttaaatttca acaattttaa  
78961 atcataagca aatcaagaa taatggataa aaactgaaaa caaacacaaa gtaaaaaact  
79021 tacaanaact acccacgcaa gctttttgat acttttataa tcattttgtc tttgaatttc  
79081 aatatttga tgaaagttaa aatttgacat tttttctctt taaaattaaa ctcgatacag  
79141 ctttttataa gtttcatacc tatcaaaagc ataagcaaaa gttaaaaaat gccacgctag  
79201 aaaaaggaat aaaaggctta aattctcaaa aaatataaaa aataaaaaaca ctaaaggcgc  
79261 aaataaaaaac gcaagaaaa aggacatttt cacttcttta aaaagcgaag caagagttag  
79321 tgaaaataaa aaataaaaaa cgaaaaataa agctaaaagc ctaaaaaata aaattttatt  
79381 ttccaaaaga aaaaaagatg agccaaggct tataatggca agcaaaaaat aaattaaaat  
79441 tttattagaa gaaaataaaa aataaattct taccaccata aaaataaaag caagaactat  
79501 ataaatccaa gaaaaaaagc ataaaaatct accgctgata caaagaaatt cacaatgtaa  
79561 acttcccaca ttttcataag aaaaaaagta aaaaaaatta tataaagcac aaaaaatat  
79621 ataaatactt aatcttttaa tcttaaaaaa tgatattttt tgttcctgtg tcattttaac  
79681 tctttgcgct ttttaagctct aaatccaaat aatctctgtg ataagatttt gttttttat  
79741 gatcttttgc gactttttcc acacttctctg tgctaagatg ttttccacc tttactccac  
79801 cttctgggccc catatcgatg atataatcag catttttaat cacatctaaa ttatgctcta  
79861 tcacaaaaac ggaattttta agatcaacta agtggtgtaa aactaaaatg agcttattta  
79921 catcttcaaa atgtagtccc gtggctggct catcaagtat gtaaagggtt tttcctgtat  
79981 cgctgcggct gagttctttt gcaagtttta ttctttgcgc ttcacccccg cttaaagtcg  
80041 ttgcattttg tcctaaggta agataatcaa gtccgacttt taccaaggta tcaagttttt  
80101 gtttgatttt tggcacagct gcaaaaaatt cactcgttc taaaacactc atatttataa  
80161 tttactgat atttttgcct ttatacttaa tctctagtgt ggcatcatta tagcgtttgc  
80221 catggcaagt atcgcaaact accattacat cgggcaagaa atgcatttct atcttgattt  
80281 ctccatcgcc actacatttc tcacatcttc caccctaac attaaaggaa aaacgccccg  
80341 ctttataacc tcgcatttta gcttcttttag tagcagcaaa aagattgcga atttcatcca  
80401 tggcccctgt ataagttgca ggatttgatc gcggagtctg tcctatgggg cttgatcaa  
80461 gataaataac cttatctagt ttttcaagcc cttcaatttg cccccgcct aattttttta  
80521 cttttttggc gcggtttaa tcttcttgccg caaaaggcag tagggtttga agtatgagag  
80581 agctttttcc agatcccga acacctgtga tcgcaactaa attttgcaaa ggaaaagaaa  
80641 cgcttaaadc tttgatatta ttgatattta catttttaag ttctaaccat tctttttgtt  
80701 ctctgttttg aagctgtgaa atttgctttt tgccgttcat ataaagtgcg gtttcgcttt  
80761 tgctttttaa aagttcttta taagttccag caaataccac ttcgcctcca aattttcctg  
80821 cttttgggccc aatatctacg ataaaatcag cttcttctat ggtcatttta tcgtgctcta  
80881 caacgattag agtattgcct ttttgttgta aatttcttaa ggttttgatg agttttgctg  
80941 tatctctttc atgaagtccg atactagggt catctaaaac atacatcacc ccacttaaac  
81001 cactaccaat ttgcgaagcg atacgaattc tttgtgcttc acctccgcta atcgtccttg  
81061 catcacgccc taaagataaa tagcctagtc ccacatcata taaaaagaaa agtctttcgt  
81121 tgatttcttt taatataggt tcagagataa gtctttcttg ctcgcttaga taggagaaaat  
81181 ttttcttatt ggcaaaaaag ttagtgctat cttctatgct catatctaaa atttcaccca  
81241 gtcctttaga agctactttt acagccaagc tctcaggtct taagcgatgc cctgcgcaat  
81301 ctttacaat tttttcactc atgtactctg ctaagtcttt ttcacttttt agcatttcat  
81361 aagccatttt tactacgcct tcaaagggtac gttttaggcg atttcttttc caaaaaaagt  
81421 caatgggttt tgcatttcca tatagcaciaa ggcgtttttg ttcttacta agttcagcaa  
81481 aaggtagttt aagaggaatt tcattttgct cacaaaaagc aattaaaaat ttataataat

81541 agcttttatt aaatccatac attattttca cgcgccatt ttcaaggcct aggctttcat  
81601 cgatgatttt tttcatatct aaggatagc gaattccaag tccgtcgcag gctgcacaag  
81661 ctcttttgg agagttaaaa gaaaaactta agggctcaag aggaacgaag gaaattttac  
81721 aagcaaagca agcagagtgt tcgctaaaat gataatgctt attaagtcct acttcatcag  
81781 ggtttaagac ttctatctcg atttctccaa agctttcttc taaacctttt tctatatcgc  
81841 ttgcaaggcg agaaagtaga tcttcttgta tttcaagcct atcaataacg agttttatcg  
81901 tatgtttttt agtttttgaa agttctatat cttcatcaag tcttaccaaa accccatcaa  
81961 tttgagctct tacatagcct ttattacgca aattttcaag taagtccgca taagttcctt  
82021 ttttttcacg cactaaaggg gcgtagatga tgattttagc gccttttggg aattttaaaa  
82081 tttctcctac tatatcgctt gcactcatag atgagatttt ttgtccgcat tgatggcaat  
82141 gctgaatgcc cactcttgca tataaaagtc ttaaataatc ataaatttca gtgatggttc  
82201 ctactgtaga acgcggattt ttagaagtggt ttttttgatc aatcgcgata gcgggagtta  
82261 ggccttcgat tttatctaca tcgggtttgc ccacctgtc taaaaattgt ctgcataag  
82321 cactcaaaact ttctatataa cggcgttgtc cttcggcata gagtgtgcca aaagcaaggg  
82381 ttgattttcc actaccgctt aatcctgtaa aaacaatgag tttatttttt ggaatttcaa  
82441 gatgaatatt tttgagatta ttttctttg caccaatgat ttttatcgta tcattcataa  
82501 gtttttccta agcattaaat aaatttggtg ttttagcata ataataaaa aattatgttt  
82561 ttaaactttt tagcatttta atggattaaa atgctaaaat tccaagtttt ctaagtagag  
82621 aatgggtggt tgcaagtata gataaagcat atacgcaaag taaaattttt ctatgggctg  
82681 aaatatgcat ttttctatg atttttatgc ctatgaaaac gcctatcata gaggcaaaac  
82741 ctacaaaac acctttatgg ataacttcag cgtcaatcac acctgaattt gaaaaagaga  
82801 taatgccaga gattgaagca aaaataacaa aaaataaaga aagcgaaacc acttttttgc  
82861 tatcatagcc caaaaaataa gccaaaattg gcgcgattaa aagtcccca cctataccca  
82921 aagaaatggc aaaaattcct gtaaaagctc cagctataaa caaaattcca tttttaacc  
82981 atatactttt atggctttta acaacacttt ctttaatacc aaaagcatat ttgataaaaa  
83041 atatacaact tactcctaaa aatatagcag taagagctac atcgcttaag gcttgtaata  
83101 aaattccact aaagcttgcc cctaaaagac cgcctagtcc tataacaata ccatctttta  
83161 gatttaaatt ctttttttta taattaatat aagaaccaa aatagccgca aaaatcattt  
83221 gcaatacaga aattccaata gcatgatgag cacttgctcc taatgcaaac attgaaggca  
83281 cgataatcat ccctccacct atgcaaaaaa gtcctgaagt aatacctgaa aatataccta  
83341 taaaaatata gggtaaatct gcaaaattca tactttttcc taaatttata tcatttcttg  
83401 attaaataag gagtaatttt atcttatcaa gcttatctta gttttaaaat gttttataag  
83461 gcttgttttg acaaaatatt tttcacagag ttacatggat ttattttttt gaagattaaa  
83521 taaacattaa aggataatth tatgtttttt tctctaaaat taataaaagt catcatagtt  
83581 taaaaaatga ggcttaattt ttgaaaggta gaagatgaat aaaaacgatt ttttaataa  
83641 ttctttaatt ttaatatcaa cacacactct tcgttcttgg cgcttctaag cttctttttt  
83701 taactcttca ttttttttat tttatttttt tacaaagggt gtattatgct tgaaatgaaa  
83761 gcaaatttat attataggca aattttaaaa aaataccctt cttcttactt tgctgaagat  
83821 tctactaggg ttattatagg tattgattgt gatttttatg acgctaagga tatcactctt  
83881 agcgaattaa aggcgaaatt ttatgaaaat gcttcaaagg agcaaatttg taaatattct  
83941 ggattttttg gtgttttttag tgcaaatth atctctttgt ttgagaattt accctcaaat  
84001 gaaaataaaa attatgattt tccaaatth ttatthgcca atgctaaagc ttatthggtt  
84061 tatgaaaaaa ctagcaaaat gttttttaaa tacggagaaa gtaagtattt tgatttctta  
84121 aaagaagatt ttatthtcga taaaaagct tgcgaatata aaatcttgca agattthcaa  
84181 gaagaaaaaa gagattttat ccatagtgtg gaaaaagcta aagaatatct ttttaagcga  
84241 gatatttttc aagtggtttt aagcaagcag ctttgatag agcataattt tgatagcttt  
84301 gaattttatg aaactttaag cgagttaaat cctagcgctt atatgtttta ttttccgact  
84361 caatatgggg ttgtgctagg ttcttctccg gagtttttac tgaaaaataa aaataaagaa  
84421 attttttttag ctctatagc aggtactcga aatthgatg aaaattcaga ttttttaaaa  
84481 ttagaaaaag atcttttaag tgatgaaaaa gagttgagtg agcataaaat gcttgttgat  
84541 ttagctagaa acgatgcgct caaatthggc aaaaatacgc gggtagaaaa tctttttagt  
84601 ataacaagaa ataaatthgt gatgcatata gtcagcgaag tttatgcgac aatggataag  
84661 caagctaata tttttgacat tataggagcg gtttttccag caggaacttt aagcgggtct  
84721 ccaaagatta gggctthtaga gattatcaat gagcttgaag atthtagacag aggagtttat

84781 ggaggtgctg ttggatTTTT aaatTTTaaC gaggatgtgg ttttagctat cgttataagg  
84841 tcagctttct ttaaagaaaa taaagctttt atagcaagcg gggcaggcat agttttgcaa  
84901 agtgatccac aaaaagaata tgaagaaatt tgcgccaagc gtaaagcttt attagtaagt  
84961 tttgaaaaaa tggctaaaag gagtTaaaat gatacttttg attgataaatt atgattcttt  
85021 tgttttcaat atcaagtcca tgcttgaaaa tgtatatgag ggtgaaatTT tagttgttcg  
85081 aaatgataaa atcactcttg atgaaatcaa agctttTaaT ccaaactaca tcattTTaaG  
85141 tcctggccca aaacatccaa aagatagtgg agtatgtctt gaaatTTTta aatcacaact  
85201 caacatccct acgcttgGaa tttgcttagg acatcaagct ttgggtTTTta gttTTaaGgc  
85261 tGaaattgct aaattgcaaa atcctatgca cgcaaaaaat tccctaatta aaatTTTataa  
85321 taaaaatacc atTTTtTaaG atTTTtGaaga tgaggtaagt gtgatgcgtt atcactcttt  
85381 agaggTtaaa aatttgCctg atgattTTTga aatTTTggct ttgagtgatg ataatgttat  
85441 catggctatg aaacataaaa cttTaccTTa tttTggcgtg caatTTcatc ctgaaagtta  
85501 ttttagcGaa tacggaatca aaatTTTtGc taatTTTtTta aatcaagaaa aagcagttca  
85561 ggataaaaaa catactcttg gattTTtattt gcaaaaaatg agtgaaaatc attattTgga  
85621 aagtgaagac ttttcagaaa tttgcaagat tattatgagt agggattatg agcctTTTaca  
85681 agcggctgct ttacttGttt taatcagtga aaaatccctt aatcaaaaaat cttTaaGcag  
85741 tcttgtgcgt gaaatTTTgC gttattctaa aacctTTtagc gatgaaagtG atatgataga  
85801 tatatgtggT actggaggag ataatTTTtaa agtattTaat gtatcaacag caagtGcttt  
85861 tattttagca gctttaggag taaaggtagc aaaacatggg aatagagcga tttctagctc  
85921 aagtgggagc accgatgttt tagatgcttt agatataaaa attcctgata atttagaatg  
85981 tgctTTaaat gattTgcaaa ataaaaatTT agcctTTTttt catgccccgt atTTTcatcc  
86041 tttagtaggt gagctaaggg agcttagagc aaagctTggc ataagaactg tattTaatgt  
86101 tttagggccc ttactTcatc ctaatTTTaaa gctTaaatat caaatgatgg gaaattatca  
86161 tgcacctgta cataagcttt tggctgaagt tTtaagatca ctaggacgaa aaagagcttt  
86221 ggtggTgcgt ggcaatgatg gcatggatga gatttagcatt tgtgatgaaa caaagatTTT  
86281 tgaagtaaga gagggtgaaa tttatgaata cggcgtTaca cccgaacaat ttggctTTTaa  
86341 acgagctttc catagtgaga ttatgggagg caatgcttat gaaaatgcta aagattTtaa  
86401 agatatctta agtggaaaaa tgcaaggggc taaatTTgat atcgtggTtt taaattctat  
86461 gttTgcactt tatacagcta ataaagtTtc aacacctTta aaagcaaaag atattatttt  
86521 agaggctata tattctggta aggtgatgga gtatTTtagg agcctTaaatg acaaagctta  
86581 aaatTTgtgg cattaaggat gaaaataatg ccaaggaaat ttctgaatta aatgtcgatt  
86641 tcatggggct tattTTTtGca aaaagtccta gacaggTtag tttagagcaa gcgatgagtt  
86701 taagcgatat catccatgtg ggattTaaaa agagtgtggg ggTTTTgtc gatgaaaatt  
86761 tggaaTTtat tTtaaaagca atcaagcaag taaagctTga tggagtGcaa attcatagaa  
86821 aaatgagtga atTTgagTtt aaaacctTaa aagaaagtgg agTTTTgtt tggcaggttt  
86881 taagcgtagg ggatcgTttg gaattggaag aaaatattta tgcggattta atTTTattTg  
86941 atactaaggg aaaatTTcat ggaggcaatg gggaaagtTt taactgggat cTTTtGaaag  
87001 actTTaaaaa agatTTTgCc ttagcaggag gcataggaac tcataatatc aatgaagctt  
87061 taagTTTtaa accaaaaatc atagactTaa attcaaagat agaaaaggaa aatcattTaa  
87121 aagatgtgga aaaaatcaaa tacatTTTtaa aggagatgaa aaaatgaaaa aggcgtatta  
87181 tggTgaatTT gTggggcagt tTTTgcctga gagTgcgatg tTTgctTTaa atgagctTga  
87241 aaatgctTTt ttgaaatTg cacaagataa aacctTTTaa aaagaactta aagaactTTt  
87301 aactacttat gtaggacgcc ccactccgct ttatTTTgct cgaaatTTTaa gTaaaaaata  
87361 tggacatgaa atTTtatctta agcgcgaaga tTtaaatcat acaggagcgc ataaaaatcaa  
87421 caatgctata gctcaagcac tTTtagcaaa aaaaatgggt aagaaaaaaa ttattgctga  
87481 aacaggagcg ggacagcatg gattagctac tgctactgct gcggcacttt taggactTga  
87541 gtgtgaaatt tacatgggag cgactgatgt gcaacgacaa gctTTTaaatg tttataaaat  
87601 ggagctTTTta ggagctaagg tTaatgctat acaaagtgga cTtaaaacct taaaagaagc  
87661 tacaactgct gctattcaag cttgggtggg ggatattaaa aatctTTTtt atgtgtTgg  
87721 aagtgccgta ggaccttatc cttatcctaa gatggTtaca catTTTcaaa gcgttatagg  
87781 aaaagaatgc aaaagtcaac tTaaaaaact aggtaaaaaa gtagattata tcatcgctgc  
87841 agtagggggc ggaagttaat cgggtggaat tTTTtatgaa tttatcaaag atgaggctgt  
87901 aaatcttatt ggaattgaag cagggggatt gggtgtTgat actccttatc atgcagcaac  
87961 tTtaaccaag ggaaaaacag gtattattca tggcatgaaa acgaaggttt tacaagatga

88021 attaggaaat atcttacctg tgcatagtgt ttctgcggga cttgattatc caggaattgg  
88081 tcctttgcat gcttttttat ctcaaagcgg tagggcaaaa tattacgcaa ttactgatga  
88141 agaatgtatg atagctttaa aattgctttg taaagaagaa gggattatcc ctgctattga  
88201 aagttctcat gctttggcat ttttggaaaa actttgtcct aaattaaaca aaaagagcgt  
88261 gatagtggtt aatttatcag gtagaggcga taaagatatg caaacgatta gagaatataa  
88321 aaaaggaatg atttatggtt gattttacaa aattttacaa ggataaggca aatgtagcct  
88381 atatggtttt aggctatcca aatttaaaaa ttagtgaaga gtttttaaag cgtttggatg  
88441 aaagttcgat cgatgtttta gaattaggaa tcgcatatag tgatcctatt gccgatggtg  
88501 agatcattgc taatgctgca aaaattgccc tagagcaagg tgacagacatt cataaaatat  
88561 ttgagctttt agccaaaata aaaacaaaaa aagctcttgt tttcatggtg tattataatt  
88621 taattttttc ttacggctta gaaaattttg ttaaaaaagc taaggctttg ggaatttctg  
88681 ctttgatagt tcctgagtta agttatgaag aaagtaagcc tttgtataaa gaatgtcaaa  
88741 agtatgacat agccttgatt actcttghtaa gcattacaac tcctaaagaa cgcgttgaag  
88801 aacttgtaaa aaatgctaag ggttttattt atttacttgc tagtgtaggt ataacagggg  
88861 ggcaaagtgt ggataataaa ctcttgcaag aaaaaatata agagattcga tcatttacia  
88921 aattacctat ttatataggt tttggagtaa aaaataatac agatgtaaga aatatgca  
88981 aactagccga tggggtgata gtaggaacaa atatatgtaa actttttgca agtaatgatg  
89041 tgaatcaaat tttaaaaggg gtggaagaaa tttttgaaaa ataatttttt aaaacatatt  
89101 tttattttat atttactata atttttaatt aagtttttta taaaggtgat attatgttaa  
89161 aagttcttga atattcaata acgcattttt ttgaacatat cttaagactt cgtatcgaaa  
89221 aggctgaaga tatagtaggt gaactttatg gagccagtat tcctataatg gaaaaaagtg  
89281 gtagagaata tcatttttat ttattttttc caaaagaatt tttacaaaca attgccaata  
89341 ttctagttcg tgatgaaaaa tttaaagaag atgattgggtg tgacttaagt aaagaatgca  
89401 ccaatcaaat cataggctat gcaaaaaatt tactcaatga tgccaaggga gatgatgagt  
89461 ataagcttgg tataccagag tatttgggca gagttgatt ttcattctatt atcttagatg  
89521 aatctttaac ttatggcttt gaaaatcatt attttagaat aggatattgt aaataatggg  
89581 cagtacatt gattttggag atcgtcacgg acttttacag tcttatgaag atattttaga  
89641 tactactgta gattttgtta gtgagcttgg tactacaaat atgagtgtag ctgaactttt  
89701 aaagcttga gtaggttcgg ttatcgatct tgaaaaacct gctggagaaa gtgttgaatt  
89761 atataatta aagcgtattt tcggcaagg cgaagttagt gtttatgaga aaaatttagc  
89821 aattagaatt aatgaaattc tagattctaa aaccgtactt caatatttta aaaaagaaat  
89881 ttaatgaaag ttttattatt aagtatactc gcgctgccac tttttgctgc agaattgatc  
89941 agttataata tttatgatag aaatgataga gtggatttaa tgttatcttt tgatagtgtc  
90001 tatgggggca aaatttctca aaaaaagaa aaaaatctca ctcttttaac tttcagtgat  
90061 ttgaaataca gcaagaaga gctaaaaagt ttaaatcag ggctcgttga taagattagt  
90121 atcagttcta aagataacaa tacatacatc atgctacaaa ataaacagcc agtctcttta  
90181 gaattaagct ccattaatga taaatttggg gttaggataa gagcagttca gcaaggcaaa  
90241 gaaagtataa atcctgaaca aaataattta agcacaatg aagagccgat tttgaattct  
90301 aaaaaaaca gtttagaagg ctatgattat acaaattaca ttttagtaat gttggtttta  
90361 tttattttgc ttatagtgtc ttgggtggctt aagagaacct tagcgtttta aatgcaggt  
90421 atttctagag attttcatgt agtatttcaa agatttctag ataaaaataa tcaattgata  
90481 gtttttgaat atgcaagcaa gcgttatact atgatagtgg gtaattctaa tattgtatta  
90541 gaagaaactg aaatttcaga ttatgagcca aagactacag aaaaatctga aaaaaatttc  
90601 gattcttttt ttgaagagaa taaaagcgt atccaaaatc ttatagagca gcgtcaaaaa  
90661 aataagaaat cttaaggctt ttgattgata gctagggcta tcgtagctgg tttggtaatt  
90721 tttttgagct catctttggg tagatcaaga atttttgatt cgctataaat ataaagcgta  
90781 ttattggcaa aggcaatttc aattttattt tcatttgtgc ttaatatttt ggctaaacta  
90841 agaataaaat tcagccaaga aatgatatga gtgtttggta aaagctgctt atagggttca  
90901 agattataag gattgacttt cttgccattg agtctaataa gagttgcaat caacactttt  
90961 tcttgatgtg aaaagccata atttaacca tttaaaataa aatatgctga gtgttcgtta  
91021 gcaaaataaa aatttaataa ttcacccaaa tgacaaagtt ttgcagcatt taatagactt  
91081 tgtttgtatt tttcatggat tttatgaaga gtttgcaaga ctttaaaaat ttgcatagaa  
91141 aaataaggtg ttttattgtt tatatttcct tgaagaaatc tatctttagt agattttaaa  
91201 ctagggttaa aatttatagg aaaagtatgt ttaggacgta ataaatcttg taaatatata

91261 ccctcgcgaa tacctacccc actagtaata atttgcttgg ttttgagttt ttctgctatt  
91321 tttagaaaga taaaaatacc ttctttaata gtatcaaaac gatctttttt gataccaaaa  
91381 ttaatcaacg catctgcttt gcaattaana atttttaaaa tatgctcttt ttcatcttca  
91441 agcatatatac taaaatcatg tatatTTTTT aagggataag agTTTTTTTg cataatagaa  
91501 tttgagattg ctcttaagct tccacctatt gcaatgagat tttgattgca aaattcagaa  
91561 ggaatttggtt ctaaaatcgg attgataaaa tcgtccaaag catctgtttt acctttatcg  
91621 taaaacaatt cttttaatct taccgttcct atgtctaata aaatacaaga gatgatttta  
91681 ttatttttaa taaggcaaag ttcgcttgat cccccaccta tatcaagcgt cgtgccatct  
91741 ctaaaaggac tcaataaatt caaggttgca agaccgcaa gataactttc gtttttccca  
91801 tcaatacatc gaatatttaa gtttagctta tctttaattc ttttaataaa atcttttagaa  
91861 tttggagcat ctcttaaggc tgaagtacct ataatgaata tttttttaca tttatgcttt  
91921 agggcgcat gtttaaaaa agccaaagca ttttcagctc tttgcataga gtcttcttga  
91981 agaatttttc cattattata agcattttcc ccaagtctga ctttgcgttt gtattcacag  
92041 gtagtgtaaa aactatacct cgaagttttt tcaaaaacca ccattctaata ggaatttgat  
92101 cctaagtcta caacagcggg tttttttgcc attaaaattc tctattgcca ttttttaatt  
92161 ttaactcttc tatgctttca acattatcag gatcaggat gatcattcg taaggacatg  
92221 ctactataca agcaggttct gaaaaatcat taacacattc tgaacaaaga tcagcatcaa  
92281 tcacatagat aggactatgt tcataaatag cctcatctgg acactcttcc ctacaagcat  
92341 cacaacatac gcaatcttta gtaatcaaaa gagccattgt cacctttcaa aattttaaaa  
92401 ataattttta gtttatacaa taacaaaact taaataaaat ataaaaata aatataaaga  
92461 taaaattttg caccaaaggg tgcaaaatgg ttaggatttt ttaggaaaac agaagcgata  
92521 tcctctacgt cgaacagttt ctatggtaga gatgtttaag ggtttgtcca tttttggcg  
92581 tatttgattg attgcaactt cgattacatt aggtgtaacg agttcagggt cttcccaaat  
92641 agcatctaaa agttgttctt tagacacaat ttgatccgaa tgtcttgcta aatgagttaa  
92701 aactcaaaa ggctttcctt taagctctat atcttgtccc ttataagtta ttttctcttc  
92761 atcagggtca ataactaaat cttctatttt gattacattg gtgccgcaa gtctaagtct  
92821 tgcttctatt ctagccaata aaatatcaaa atctaaaggt ttttttaca agtcatccgc  
92881 tccagctttt aatgctttta tttctgtatc tttgtctgtt tttgcagaca taatcatcac  
92941 agaagttctt ggagacttat gcttaattgt atttacaagc tctgcaccat caccatcagg  
93001 taaattccag cttgctaata ccaagtcata gtgtcttatc ccaataaaat attcaccatc  
93061 tttgaaattt tctgaagagt cagtttgata accaaattca ttaagattat ctataatagt  
93121 tttattaagg ctaatttcat cctctataac taaaatcctc atcattatat ctttcgttaa  
93181 gaaattttta aaaaattata acatagttta agtaaatgtt tagatatctt taaacaaaat  
93241 ttaataaaat ttttttaatt ttactccaac tcttgtattt ttgattattt caggtttata  
93301 agttgaaatt ttgatatagt aaatttgtgg aaatttttta tgaattttg cacaaacaaa  
93361 ttctaaagat tcttctaggg taagaaattg ttctttttta tagtattttt tgattttttt  
93421 tgacacttta gcataatcta aaaaatcgtt cgccttagcc ttaagatgaa cgcaaacttt  
93481 ttgttttttc ttgcgttcaa attttaatat tcctataatg catttaact gcattttgat  
93541 atttatataa ctttgcattc ttctttgaaa accaatcttt tgatattttg caaatgttta  
93601 taaataatta taaaagctat aataaataca ggcgcatgcg tcttgatggg ttgcatatca  
93661 taattaaaga taaaagaact tcctataaaa actaataaag ccaataaaga tgctaaagat  
93721 gaaattttta aaattttacc cacgataaac caaactataa atgctgttaa aagttctaaa  
93781 ggcaaaagca ctatcatagc gcctgctcca gttgcaacc ctttaccacc ttcaataaaa  
93841 agatagattg aaaagcaatg tccaaatacc gttaaaaccg caacagtcca aagtagattt  
93901 aaatcataat ttaaaaattt aagtataagc aagggtatag ttgcttttgc gaaatctaaa  
93961 ataatagtag cgattgcaag tttttttgct aaaactggat ctttttctt aacaactctt  
94021 aacacatttg ttgcgcttat gctttttgag ctttgatttt gtatattaat cttagcaaat  
94081 tgtttggcca aaattaaacc aaaaggaata gagcctaaaa gataagcaat tgcataaatg  
94141 attaaatttt ccattattaa ctttaagaaa taattgaagt attatatgca aaaaaataa  
94201 ataaatcaaa aaaataggat atattttgta ttaattaatt attaatatta ttttaataatt  
94261 tttataaata tttaagtaat aaagctatat tatttagttt aagtttatat ctaaaagtaa  
94321 aggagtttgt aaatgaaagt caaatcgttt ttgattgcat cattagttgc tttttcaagt  
94381 ttaaattgcc aaagtcttat agaagaggct aaaaattcag gtttagttgc tttaccaaaa  
94441 gatcaaaaag gtgtagatga gatcttgaaa gcaaatggag taaaggctac tgaatttact

94501 cttgataaag ttgagctagg taaaaagcct tattttgagc ctgcctttc aaaaagcggg  
94561 attatttcat gtaatacctg tcataatcta ggacttggtg gagccgatgg tatcagtgca  
94621 gcagtaggac ataaatggac tgcaaacctt catcatttaa attccccgac tgtatataat  
94681 gccgttttaa acacgactca attttgggat ggacgtgcag gaactttagc tgatcaagcc  
94741 aagggacctc tcgaatctga agctgaaatg gcaactccgg caaaattagc tgtagaaaaa  
94801 atcgcttctt tgcctgaata tgttgcagaa ttttaagaaaa tttatggcaa aagcgggtgtg  
94861 aattttgaca atattgccga tgcaatagca aattttgaaa gaactttaat tactccatct  
94921 cgctttgata atttcttaaa tggagatgaa aaagctttaa ctaaagagga gcaaaaaggt  
94981 ttaaaacttt tcatagataa aggttgtgta gcttgccata atggtgtaaa tttgggtgga  
95041 aatatgcaag catttgaggt tgcaggtaaa tataaatttg caaatttggg tgattttaaa  
95101 ggggatgaaa atggtatggt taaaaccca actttaagaa atgtagttga gacagctcca  
95161 tatttccata atggtgcgat atggaaatta accgatgcga ttaaagaaat gggtagtgtg  
95221 caacttggca ttcaaatttc tgataaagag gcaaaaagca tagaaacctt cttgaaatct  
95281 ttaaccggaa ctaaaccagc agtggtttat cctcaacttc ctgtttctac ggaaaaaact  
95341 ccaaagcctg aactataagg ccatcaaacc ctaaactttt ttagggtttg tttaaatttc  
95401 tttatctagc tctgctataa tttctagaat ttcattgaga aaggtttaat gatgaaactt  
95461 tttggaacgg atggcgttcg tggaaaagcg ggcgaatttt tagatagttt tttagctatg  
95521 cgtcttgcca tggccgctgg aatttatttt aaagataaga gtgttacaaa taatatttta  
95581 gtaggtaaag atacaagaag aagtggttat atgatagaaa atgctattgt ttcgggtcct  
95641 acctccatag gatataatgt aatacaataa ggtcctatgc caacgcctgc gattgcgttt  
95701 ttaactgaag atatgcgttg tgatgcgggt attatgattt cagcttcgca taatccttat  
95761 tatgataatg ggattaagtt ttttgatgca cacggaaata agcttagtga agatatagaa  
95821 aaaaagattg aagaaattta ttatgatgat aagcttattc aaagctctaa agttgatatg  
95881 gagaaaatcg gtcaagccaa aagaattgat gatgttatag gaagatataat tgtttctatt  
95941 aagaattcct tccctaagga tttaaactta aaatcattgc gtgtagtctt agatgtagct  
96001 catggagcag cttataaggt ggctccgact gtttttaaag aacttggagc cgaagttata  
96061 gtaatgagtg ataaacctaa tgggcttaat atcaatgaaa attgcbggtgc cttgcatcct  
96121 tcaaatttag ctgctgaagt aaagcgtttg cgcgcggatg tccggttttg ttttgatgga  
96181 gatgcggatc gtttggtttg gtagatgag aagggtgagg tagcaaatgg agatagcttg  
96241 ctcbgagttt tagctctttt cttaaaagaa caaggtaaat taaaatctag cgtagtagct  
96301 actattatga gcaatggagc tttgaaagaa tttttaaatc agcatggtat agagcttgat  
96361 acttgtaatg taggcgataa atatgtgctt gagaaattaa aagctaaggg tggaaatttt  
96421 ggcggagagc aaagcgggca tattattttt agtgattatg caaaaacagg agatggactt  
96481 atagcagctt tgcaatttag tgctttgatg ctttgtaaga aaaaatctgc aagtactatt  
96541 ttagagcaaa tcaaacctta tccacaactt ttaaccaatc ttaaaatttc agaaaaaaa  
96601 gatttagata agattaaggg tttgaaagag ttaaaacagg atttggaaaa taaaaatatt  
96661 aatgtgttat ttcgctattc tggaaacagaa aatttgatca gacttttact agaagctaaa  
96721 gatgctaaaa ttttagaaaa agaaatgaaa aatgtagttg aatttttcaa gaaagcattg  
96781 aatggttaaa aaatataaaa ctatcttgat atttatttta gtttttatcg tagttttgct  
96841 tttgatcag tgggtaaagt ctttgacttt atcaggtttg cgttggcaaa gtgagtattt  
96901 ggatttaact tatgctctaa acacaggagt tgctttttct atgttttagtt ttttagagca  
96961 ttatttaaaa tacttacatt tagctttgat attagcgctt tttatatacc ttttgggca  
97021 aaaacaattc ttaagagagc atttggtagc ttttggcatg atgctagggg cgggggtgttc  
97081 gaatttgctt gaccgtttta tacacggagg agtgggtgat atgttttttt ggcacaaatg  
97141 gtttcatttt gctatcttta atgtagcaga tgtgatgata aatataagcg ttgttttaat  
97201 tttattaaaa gaaattttca taaaaaaagg aaaaaaatga cagaatggat taatgagtat  
97261 tatttttggg ttaaatgggt gcattattta gcatttgttt catggatggc aggacttttt  
97321 tatttgcctc gtttgtttgt atatcacgca gaaaataaag acaataaagg ttttgttgat  
97381 gttgtaaaga ttcaagaaag aagactttat tttggtatac aaaatcccgc gatgatagca  
97441 accgttatta gcgggagttt gatgcttcat gctcataaag aagttttgat ggtaggttct  
97501 ggatttatgc atgcaaaact tacctgtgct acacttttga ttatttttca tatacataat  
97561 tatttttgtt taaaagcttt ggcaaatgat acttctacaa aaagtggaag atattttaga  
97621 atttataatg aatttcctac tttaatgttt attatcattg cttaatgat ggtaattcgc  
97681 ccattttaat tttcattatc tatttaattt caaaaagaaa ttaaataagag cttatatttt

97741 ctttcattat attgataaaa tctttatntt ttaagcgttt gctgtctcta aatactgcmc  
97801 gtacaagatc catccctgtg taaaaatcct tcattaaaaac tacaaagaga tactgtccaa  
97861 attcacttgt aatcaaagtg ccattttcct ttttgatagc attgcttatt ttaagtccta  
97921 aaagttcttt aaagagttct ttttcaagat cgcaattaag ggtttgattg aatttatcaa  
97981 tttgtatntt tcctgcaaac atttcagtta aaaatatgta tttgataatc tctttttgtg  
98041 taaaactcmc ttttgctata ttggcatttt gtttttcttg tatcattntt gcataatcat  
98101 ttaaatcaaa agcattgata agcaactccc cgtctaaaaa gctaaaagct ccacttccaa  
98161 ctccataaata ttcatgatga gagcttacat attcatcgtt gagttgattt ttttctaaag  
98221 aaaaactcca gccattatnt tgctgataat cttgaaaaa atctcgtatc atttgatagt  
98281 atttaaattc attatcttta atctcaacgc caagactntt ggctatattg tctttggtta  
98341 gattggattt cattaaagga taggttgtga tttgttgagg ggctaaattt ttggcgattt  
98401 ctaaatcatt taaaagttgt tcttctgttt gcgatgggaa attaaaaatt aaatcaagac  
98461 taaaaatcgg taaaattcct aaagctnttg aaatntttt ttgcaattgt ttagaagatc  
98521 caaatttatt gtatcttgct atntttntta aaatntcatc atcaaaactt tgaattccac  
98581 agcttaagcg atcaattata cttttaaaca tagagagttt ttcagggatt atatgattag  
98641 gatcgcntt gcaagaaatt tctttgatat taaaaagttt tttacaaagt tctagagttt  
98701 ttaatagttc atnttctgtg attaatgttg ttccgcctcc tacatacatt gagttaaaaat  
98761 caaacctnt atctnttata agtacaagct cttntcttaa atnttcaaaa taaatnttag  
98821 ccaattcctc atcataatag tatttatgaa aactacaata agggcaaaaa gtatgacaaa  
98881 aaggatatg agcataaagc atatagctnt tatcttgctt tgcttgnttt tcttgaggat  
98941 tntttaaag ttcgacattg aaactnttat gcaagagttt ttccatcatg gcatgagaat  
99001 atnttaaagc caaattntga aacaattca ttaactcacc ttaaagggtg aaatataata  
99061 taactntatc aatntnttac taaatcaagt gtaaattntc ttatnttag caaaaaaatg  
99121 ctataactnt caaaataatt agaaaggatg gtttatggat aaaacaaaag tagtgaaaaa  
99181 tntaaatgca ttgtntaaac aaagggcgga atnttattc tnttttgata agaatnttc  
99241 aaaagttggc aatactgaag tgtttgattt tagcaatgct aaggattnta atgcmggagga  
99301 ggntntaag caatnttatc atnttagatta tgcgatgaga aaattgctac ctgctatnta  
99361 taaagcgtat gaggttagtg atntctgattt aaatagagat tnttagcaag agcaatntaa  
99421 tntagagagt aaattcttac tctctaaaag acatatctaa atntnttgat tcttcttcta  
99481 tntntntacc aatatcttca tntntntcaa aaccaccacc aaaagctntg ataacattga  
99541 ctatagaatt ggcataagaa tntttgggtg tattaaaagc aactgtagca tntagccaat  
99601 cttggcgtgc ttgtagataa tcttgcaaag acatntcacc tacatcataa cgctctntac  
99661 ttatntcata aatntntnta taagataatt cacttgcttg cgcgttgnta tactgcaagc  
99721 gaatagtctt tctagcaatt aaagcatagc gaatntctc aaaggctgcg actaggggtg  
99781 tntgataaatt taaaaagct tcatccttgt tgagntntgc taaattcaca tnttgataaa  
99841 tntctccca gcggaaaatt ggcatntgta aatntccacc tatatntcaa gntctagagc  
99901 ccgcttctac aagtgtatnt aagtccccac tntcaaatcc taataagccc gtcaatgaaa  
99961 gattaggcaa gaaagctgtg cgagctactc ctactagata atnttgntga gtaagntntt  
100021 ccaaagaaga accaatatca ggacgttgca agagtatagt acttgaaatt ccacttgnta  
100081 tatcaaaatc tntgagcttg aaaacctgat aagcttgatc ttgataaaga atatcgtnta  
100141 aatcattntga agttagaatt tntaaagctt taagatagtt tctnttattt aatnttgctt  
100201 cattgtattg caaagcagta ctttctaaat ttgctcttga ttgtgcgatt tctgattctc  
100261 ctactgctcc tacttgaaat tnttcataat taatntgata aatntcttgt gctgagtcac  
100321 aagcatctnt taaagctntt tcattntcgt ttgcattntac aaaatntaaa taagtctgaa  
100381 ctacgcttga aactatagaa agtctcgcag cttcataatc atactgacta gctntaaagc  
100441 ctgattntga agcgcggtaa gtatcgcgat atnttccca aagatcaatt tctgtagctta  
100501 aatccagtcc cattntntaa tcattgccat aactgacttc cccagtgcgg ttgcttgagag  
100561 cgntntatggc tgtntntgca cgattntgcg tagcgtacc atctaatntt ggcaacaaat  
100621 cactaaaatc tatacctaag tgagcagcag cttgtntcat atgaataaaa gcaagctnta  
100681 aatcattatt gntctntaagg gctaaatcaa caacttgatt taatntctca tcatcaaatt  
100741 ctttccacca tntctntagaa agagtatgat tgtnttctnt tntccaagat agagcaccta  
100801 gcttattatc aagactataa tntgctntcg gaacatntaa atnttgactt aaagaacaag  
100861 ctgaaataaa aaggctntaag cttgctntaa cactnttntga aatntntnta tntcatgaact  
100921 ttaccctntt tctntatctag ccactcgttg aaatnttcta aaagatagaa aaataaaggt



100981 acaaagaata tagctaaagt agaagcagct atcattccac caataagccc tgtccctaaa  
101041 gaatgtcttg aagcgcttcc tgctccagtt gcaaaaatca ttggtaaaac cccaaaagta  
101101 aaagctaaag aagtcataac tatcgggtcta aagcgaagtt ttgcagctgc gatagttgca  
101161 tcaaatatatt tcttaccttt cttaaagcgt tcttccatag caaattcaac gatcaaaaata  
101221 gcattcttag ctgaaagtcc aattaaagc aagagtccgg tttgaaaata tatatcatta  
101281 gtaaactctc ttaagtatac aagtaaaaac gaaccaaaaa cggcaaaagg tacagctgta  
101341 acaacagcta aaggtataag ccatctttca tattgtgctg ctaggattaa gaatacaaac  
101401 accataccca aagcaaaggc atagctccct gttcccttgc ttgaaacttc ttgataggct  
101461 gaaccactcc aagctataga gtaatcatca cttaaagttt cttgtgctac ttgggaaatc  
101521 gcttctatgg cttgtcctga agtgtatcct ggagcagggt gtccttgtat ttgtgctgct  
101581 gggaaaatat taaaacgttt tacatcatct ggccctgaac ttctttgtag agttaagaaa  
101641 gagtcaagtg gtatcatttt tccatcattt gagcgcacaa aatatTTTTT caatgcattt  
101701 tgggtattta taaaatctcc ttttgcgcga atattgactt gaaaatTTTT accaagcata  
101761 gtaaaatcat taacataata tgttccaata gttgcattca ttgtactgaa aacatcttgc  
101821 atatttaaata taaaatgctt tagtttatct ctatcaatga tgagtttata ttgaggaaag  
101881 ctcgatcaa gagtagttcg aaccccatat aattcctctc tttgattggc tgctgctaca  
101941 agtttattta catcttcttg aatttgatcg tagctttttc cgcttttatt ttgcacatac  
102001 atttcaaac caccgtgat acttagccca ggtataggag gtaatcctct aaatacactt  
102061 gcagcattgc gatcaggagc aaatTTTTT ttaagctcca tgatgatttc atcagcactt  
102121 acatttctat cttccaatc ttcaagccct ataaacattg cagcggcatt ttctttaagt  
102181 gagcttgtaa ataaatcaaa acctatcata gccatagcat cttttacgcc attggTTTTT  
102241 agaatttctt gactcataga gtcaacttcc gagatcgttc tatgtagagc tgaagccgaa  
102301 ggaaggttga taatacctat cattaaacct tgatcttctt caggaaccaaa agagccagga  
102361 acttgtttat aaagataaaa aattgctccg agcatgatac agaaaatcaa acaaaaacga  
102421 atggttcttt taagcatata agcaacgcct gactaaata tagaagtgct ccagtcaaag  
102481 aaatcgtaa atttttgaac gatgtaaaaa ggcttgcttt cattgctgct taaaaagagt  
102541 gcacataaag aaggtgttaa agtaagggtc acaaaacctg atatggtcac agatatagct  
102601 aaagtgagtg caaattgttt ttgaatttct cccacaaagc ctgaaataaa agatacagggt  
102661 ataaaaacag cacaaagtac aaggacaatc gaaattacag gtgagcttac ttcttgcatt  
102721 gcttgaatgg ctgcatcttt aacgctgata ttttcatctt cgtgtaaaat tctatctata  
102781 ttttcaacca caataatagc atcatctacg actataccta tggctagtat cagggcaaat  
102841 aatgttaaaa gatttatact aaatcctaac aaataaagtc ccgcaaaagt tcctagtaat  
102901 gaaacaggaa cggctatcat aggaatgagt gttgagcggg aatTTTTTaa gaacatac  
102961 ataacaataa taacaaaat caacgcttca acaaaggttt ttacaacttc tttaatagac  
103021 tcgataacaa atttagttgt atcgtatgga attttatatt ctaaacttc gggaaagctt  
103081 tttgatagtt cttgcatttt agcttctaca agctttgctg tattgagtgc atttgctcct  
103141 gattgaagat tgatcataat tggaaaccgca tcatttccgt ttaatcgccc ttgagattta  
103201 tattgttgag agcctatctc aatatctgct acatctttta atcttaaaaa agaaccatct  
103261 tcgtttgttc ttaggataat attttcaaat tcaactagggc tttgcaatct tccttgcag  
103321 gtgatagaat aaacataagg tgatTTTTga gtcaagggtc cttcgccgat tttacctgtg  
103381 gcatattgag cgTTTTgatc attgacggct gcgataacat cagtagctgt tgcacaaat  
103441 ttgtttaata aatcagggtt gagccaaatt cttaaagaat aattacgatt tcctatagcg  
103501 ttagcatctc caacgcctgg aacccttttt aattcatcta aatatTTTaa agtaatgtaa  
103561 ttatatacat ccactgcact cattgaacca ttacttgaat acatagagat agcagcaagt  
103621 gttgtagaag aggtTTTTct aactgtaacg cccagTTTTT ttacttcatc gggcattttt  
103681 gcagttgctg ctgaaattct attgttaaca tctatggttg cttgatcagg atctgtaccg  
103741 atattaaaat acacggttaa attcatgggt cccgaggaac ttgaagtcga atccatata  
103801 atcatattat cagcaccatt aattgcatct tcgatagggt ttgcaactgt tgtggcaatg  
103861 gtttgagcat ccgacccgt gtaggttgcg ctacttttaa ctgtaggagg agttaaggat  
103921 gggatttgtt ctatgggcaa atttacaagt ccaatagccc cagccaaaga gatgataata  
103981 gctacaacag aagcaaaaat aggtctttcg ataaaaaatt tagaaaacat tattgtgctc  
104041 caacttcttt aacttcgcta tctagtctaa tttttttaa gttatccaaa atgattttat  
104101 ctccattttg tagcccttta tcgataacag catattcatt atcttgatag cttatatgca  
104161 caggagcttt agcaacctta cttctttta aaagaaaaac ataaactcgc ttttgatctt

104221 gcttgattgc aatttgagga attttaaatc catttttttg gataaaacca tttgaagtaa  
104281 tcggtgcaaa ggcacctggc aaaagagtag agtcattatt gtcaaaaacc gcttttagctt  
104341 ttactgttcc actatctgca tcaatgactg aatctataaa ataaagtttg cctttaacta  
104401 cttctccatt aagatttaaa tctgcataga tattgcttaa atcccatfff ccatcttgag  
104461 tattgcaaac gatattgagt ttatctgtat ctgaaatgta aaaatccgca tagattggat  
104521 tgaggtttgt aattcttacg agttcggttg aagaggaatt aacataatct cctatattga  
104581 ttaaagcatc tcctacaata ccatcaaaag gagctttaat ttcagtataa gctaaatcaa  
104641 tgcgtgcatt ttctaagtct gctctagcgc tagtgagatt tgcttttgta ttattaaaat  
104701 ttgctaaggc actatcgtat tctttttgag agattgcacc tttgttgtaa agagtttttg  
104761 agcggttata atctttacta gcattatcaa aatttgctct agccattaaa gcctttccat  
104821 aggctgaatt tacacttgct ttaaatttat cttgttcaat aataaaaaga gtttgcctt  
104881 ttttaattaa atcacctgct ttgaaaagtt tttctacaat aacaccgctt acttgagggt  
104941 tgatgatgac atcataatca ctaacaagtt ttgcaggata agtaaagcta agcggtaaat  
105001 tttcggcttt gacactcata gtgctaacag attgaggagg tatttgtttt tgagggtgctt  
105061 cttccttact acaagcggaa aataaaaata aagcgttag aagtaaaagg gtattttttt  
105121 gaaacgaatt catgattttt gccttaaaat ttttaattta aatataattgt aatatttatt  
105181 acaaaatttt taagacgtat tataactcaa atttggttaa taatttttac atttacttaa  
105241 ttaaattgaa gttttatttt caattccttt taaaaatata ttgacaataa aatctacatg  
105301 ttctttttgt tcttgttcgc tcattaaagg agtatcagct aaaacattta agctatgata  
105361 aggctctctt aacatagcgc aaaaaagcac agcaagtttt tgagcattat ttgaaatata  
105421 gctactatftt tgtttttttaa aaagttctat aagtatgcta taggagaaaa tttctgatt  
105481 attttcaatc caatttttaa catgcttatg tttatcataa acttgagaaa aaataatttt  
105541 accaaaggca acagtttgga cttgattgaa aatatcaaca aaagtaagtc caaaagaggt  
105601 taaaaattcc tttaaatttt catttttaat ggtttgagtt tgggaggcta tcaaatcaaa  
105661 atgttttttg caaacatcat ctaaaatttc aaaaaataaa ctttctttac tatgaaaact  
105721 atcataaata ttagaatagc aaccgccga taatttaata atatcactta agctagtttc  
105781 ttgaaaacc ttggttaaaa atagatcaaa agcaacattt ttaatctttt ctcttcttgc  
105841 taaaactttt ttagaagggt ctttatttgg attcattata ccccttttaa attggtgctt  
105901 taggataaac aaaaatgctt tctctaaaaa tgacaatctc tttattatct ttggcatagg  
105961 cttgatgtg aagtggaaaa atcacatctt tttgatcatt atcagccagt ttttagtag  
106021 cttttattac aacaattttc tttagcttgct ctctgcttt taatgtaaaa gctttgcttg  
106081 gacgaatgat ttctatgcca ttatcaatgc cttctaagct ggcttcaaaa taatattcat  
106141 gagttttaga atcagtattt tgaacaataa aagtatacgc atttgaaatt tctatacctt  
106201 tgtgagtatg tgaatttga taaagctcac tgctacgatt gatattttaa agcatatttt  
106261 ctttttact acccatgatt atcaaagcaa tcaaagcaat taaaagaaca ataaaataag  
106321 caatagttct aaagcggaaa taatttactt ttttgcgtgt ttctatggct tttacgctag  
106381 tccaattaat caaacttgggt ctgttaaatt tgctttgcac tttagaacag gcatcagcgc  
106441 attctaaaca attgatacat tcaagttgca tgcctttgcg tatgtctata tgggtaggac  
106501 aaatacttac acaggcctca caacctatgc attcacctc aggtgggttt ttataaagtt  
106561 tggatgtcc atcataaatc actcctccgc gtttttcatc ataaatcact tgcatgggat  
106621 cgcatcaaa cattacggat tgaactctg cataaggaca tacataaata caaaattttt  
106681 ctgctaaata ggtaatatct aaggttaaaa ataaacttgc acaaaataaa ataccaagta  
106741 aaagcaaatg ttcgccagga ttttgtatat aagcaaagaa atcttcaggc ggaacaaaat  
106801 accaaagtaa attacttaca gctaataaag atatgaaata aaataaaatc acacctataa  
106861 ttttttttaa ataataacct tcatattctt tttgtttatt gttgatattt ttacgaattt  
106921 ttaaaagctt agtttgata atatctctat aaatcacctt aaaaatagtt tgaggacagc  
106981 tccaagcaca ccaattctt cctcccaaag tagttataaa aatataaat aaaaaagaa  
107041 aaataagtaa aaaaggcata agatataatt cttgagttga aatgaaata aaaaatagat  
107101 tcagtttggga atgatcaaaa ctcaataaaa agaaatgggt tccattaatt gtaacaaaag  
107161 gtaacaaaaa tattacaatt gttgcaacta aatatgtaaa ataacgcttt ttagtatagt  
107221 tggatgatag attttccata aaaaacctcg taaaaatta gtaattacga ttatagcca  
107281 aaaaactaaa acaattttta aatgctttct aagtttgat taataagaaa tgttctataa  
107341 tcataattca caacaaaaat ttacacagaa aggtggtgag gatagtcca ggaatcaagg  
107401 tacatcctaa cgagtctttt gacgaagcgt atcgttaagtt caaaaaacaa gtagatagaa

107461 atctagttgt tactgaagta agagcaagaa gattttttga gcctatgact gaaattcgta  
107521 aaaaacaaaa aatttcagct cgtaagaaaa tgcttaaaag actttatatg cttagacgct  
107581 acgagtcaag actttaaccc aaagcccgaa agggcttttt atcctaataa tttcgttata  
107641 aaattacttt gttttaaaat cctagtttta ttttatatat attaagtttg cgttttgttt  
107701 ctttaaaaaa ttttcatttt tgtaagattt aattgattat tttttgtag aattttatca  
107761 aaaaataaat tccaaatctc atttgaggat caagactatg aaaaaaatta aaaaaattat  
107821 ccaaattggg atgataagtg gccttacagc tgttgcaggt ggagcttttag taggatgtgg  
107881 aggtagcaat gataatagcg atactttaaa tcaagcggca aatgctcaag gagcttttgt  
107941 tatcattgaa gaaattgccc caggtcaata taaaatcaaa gatcaatttc caagtgatga  
108001 aactaggggt gttttaaaag atattaatgg cacagaaaga gtattaagca aagaagaaat  
108061 ggatgcactc atcaaagaag aagcagctaa gattgataat gggacttcaa atttgactaa  
108121 agagggtggg caaatcagta gtggaggatt gagcttagga gaaactttgc ttgcaagtgc  
108181 tgcaggtgcg attttgggta gctggatagg ctctaaactt ttttaataatc aaaattttgc  
108241 taatcaacaa cgaggtgctt tttcaaatca aagtgcctat caaagaagtg ttaatagctt  
108301 taataaagca ggtgcagcag gctctgcttc aagtgcctca aatcaggat ttttcggcgg  
108361 tggttctaaa tcatcttcaa gttcttcttt tggatcttaa ggagaaaaga tgagagtagt  
108421 acaggttgaa aaacttcaaa aagattatth agaaagtata ggattttcat ggcatagtga  
108481 tgaagatgga agtgattata taagtataa gttagtatgt gtaagtgaaa atgaagctaa  
108541 tgcttattat gaagcagtga atgagcttta tgatatgttt gtagctgcag cgcaaaatgt  
108601 tatagataat aatcgttttg atgagcttgg aattcctttt aatcttattg acgctattaa  
108661 aatgagttgg gaaaatgaag tgcattggca tttatatggg cgttttgatt tagcaggtgg  
108721 tcttgatggg aaacctataa agcttataga atttaatgca gataccccaa ctgctctttt  
108781 tgaaagtgcg atcttgcaat gggcgatttt aaagcaaaat ggtatggatg aaagtaaaca  
108841 atttaatagt atttatgaaa gtttaatgga taattttaaa agattgatca ctcttgagga  
108901 ggatactcaa ggttttgaag agtattatca aggatggaaa attctttttt caagtgtggc  
108961 aggaagtaaa gaggaggaaa tcactacaaa attacttgct catatcgcaa atgaagcagg  
109021 atttcaaaact gatttttctt ttgtagatga ggttgaattt agcgaagaag gaatttttaa  
109081 agagggtgta aattatgaat attggtttaa actcgttcct tgggaggata tagccataga  
109141 agaaggcgag cttgccatgc ttttaacaca gattatgaga aatcaaaaag ctattattht  
109201 aaatcctgct tatacacttt tatttcagtc taagggaatt ttaaaaatth tatgggagct  
109261 ttttccaaat caccattac ttttagaac acgagatact cttttagaag gaaaagacta  
109321 tgtgaaaaaa cctgtttttg gtagagaagg ggcaaatatt agtataatca aagaaggtaa  
109381 aatthtcat gagaatgtag gtccttatgg aaacaataaa aacatthtcat aagaatatht  
109441 agaatthaac tcacatgata atgaatatta tcaagcaggt gttttctttg cttatgaggg  
109501 ttgtggcttg ggcttttagaa aaggtgggct tgtgcttgat aattatthcta aatthttagg  
109561 acatgttatt gaagggtaaa aaaatgaaaa ttgtatgctt ggatgcggca actthtagggg  
109621 gttatgattt aagtatthtt aagcattttg gagaatthca aagttatgct ttaacggata  
109681 gaaaagaaac catagagcgt ttaaaagatg cagatgtggg tatgacaaac aaagttgtta  
109741 tcgataaaga agttatggat gcttgcccta atthaaagct taththtagaa acagctacgg  
109801 gtgtaaataa tatcgatgtt gaatacgcca aagaaaaggg tathatcgta aaaaatgctg  
109861 ctggatattc tactatgagc gtagttcagc atactthtgc atthaththt gctthththaa  
109921 atcatattcc ttattatgat aatggagca aagagggtaa atggtgtgat agccccatct  
109981 ttacggattt tagtagaatt ttaaattcaa tggagggtaa aaagcacggg atthtaggac  
110041 taggcagtat aggtaaagaa gtggctaaaa tttctagtgc ttttggggct aaaatthgtt  
110101 attatthcaac aagcggactc aatcaaaatg ccgaatthga atgctthaat ttggaagagc  
110161 tthtaagaac ttgcgatatt gtttagcattc acgctccttt aaacgaaaaa acaaaaaatt  
110221 tgcttactta tgagaagtta aaactththaa aagataatgc gattthtgggt aatgtaggta  
110281 ggggtggaat cattaatgaa aatgattthg caaaaaataat agatgaaaaa aatathcgcg  
110341 taggacttga tgtthtagag agtgagccta tggthtaaaa tcatcctctc ttaaatatca  
110401 aaaaataaaga aatctcatc attactcac atgtggcttg ggcaagtaaa gaagcggtagg  
110461 aaaaattgat gtctatgggt tatgataaatt taaaagaatg gatagaaaat ggcaagtgaa  
110521 catagthttg ataththcagc ggctthtagat aaacaagagc ttaaaaatgc tththgagcag  
110581 gcaaaaaaag agcttgattc tgcctatgat ttaaaaggta ttaagtgatga aatthgaattc  
110641 agtgagaaaag acagtgthttt taagcttcat tctthcaagt aagcaaaact tgatgththt

110701 aaagatattg tgatttcaaa acttataaaa agaggcatta attctaattgc tattaagag  
110761 ctttcacgcg aaagtggagc gatgtttcgc ttgaatttga aagccaatga tagcattgat  
110821 agcgaatg ctaagaaat caataaggct attaaagata gtaaattaaa agtaagttct  
110881 tccatacgag gagatgaaat tcgtgtgggt gcaaagcaaa ttgatgattt gcaagctgtg  
110941 atgaaaatgg ttaaagagct taatttagaa ttaaatctta gctttaaaaa tttaaaatag  
111001 gtcaagagta ttgaaaaaaa tttttatcct ttttttgctt ttatttttta gtgcttgtgc  
111061 tttaaaaaat caagactatt ctagtcaaaa aatgaagggt gtatttaata ctccagctat  
111121 taaaatcaac gattttgggt ttttaaaaaa agaaaataaa gccttgaatt tagaagttta  
111181 taaactaggc caagcctttt tcaagcttaa aataagagag gatatttgtt taaattcgggt  
111241 atgttatagt aagacagtat ttaatcaaaa atttttcaag aatgcttatt atgaagatat  
111301 attaaaagat attttagaag caaaccttt atggaatggt aaagatatgc aaaaaacca  
111361 atgtggtttt aatcagagtt taaatagtgc aaattatgaa attttttacg aagtgtgcga  
111421 taataaaata agtttttttg ataagacttc gcatataaaa attatttttag tgaattttta  
111481 aggataaaat ttgaaaatag ggctattggt gtgcttttgt gtaagtttga tttgtgcgaa  
111541 aatttacaag ggtgaaatth attttttacga tttaaaagat aaacaaatth ttgctatagt  
111601 ttatgataat gctcctttcg tgcccatttt tgatagggat gttaatcaaa ctagtccag  
111661 ttttttaata cttagcgatc ttgatacaaa tatagaaata gctccttttc aaacagcaaa  
111721 ttcatgggaa gatgaacaaa aaaaatatag aatttcttct tctaaggagc tgatgtttga  
111781 taataaaaca attcaaggag atagactagg aacaacaact cttgaaacta taaaagagca  
111841 aaacaataca agaatcaaac gcagtctcga ttttttagtt tataaagatg agatcaggga  
111901 gttccatcct atacataagc aagttgttag ttttgaacaa attcgccaaa agcctattgt  
111961 attaaaagat ggaaagcttg gttttgaaga atggtattat ttttacgaag aggatagtcg  
112021 tgcaatttta gagctcaata attttgtttt cgatatggat aaaaaagtat ttttaattt  
112081 aaatgagctt tatgatgtgg ataatttgaa atttaaagaa ctcttgcac aaaaacttaa  
112141 actcgtttgt gatgagtgtt ttgatgatat ggagcaagtt tcttttaata ataattttt  
112201 acttacaat tctggtttta gattgtgcta tcttccttat gagaatcatt atttggatga  
112261 aatatattgt gttgatttta atgaaaatga gataaaggaa tttaaaaaat aaaatggtta  
112321 ggctaaagga atttttaagt cttaaaaaca tagaagaaag tcaaatttat aaagaattaa  
112381 agtgttcaaa aaacgaagct ttgattttta gagaactttg taaaaactat gtcatttcca  
112441 tatcttctat caatgctttt actttattaa cgggaattht tggcagtga aatatttctt  
112501 atttggatac ttttagaggat ttaaaaaggc ttattgaaag aggttttata aatcaaaatt  
112561 ctggtttttt taaaaatata gaaagcaata aaagccaaaa ttttaactctt agtttattgc  
112621 aaagtgaatt gagtttaagt gaatattttt tagaattttt ggaagctaaa cctcgtttga  
112681 atttggataa gaaagaggct tatggagagt atttagaata cttaaaagat gaatttatga  
112741 gagttgagct atatgagaga ttgagtttta tacgctcaag tgcatacagt gatgagctga  
112801 aagcacaat caagctttat gaaaaatata ttaaagaaag acttaagaaa agtaaatttt  
112861 ataataattt agcagatc tttaaagagt ataactttga aggcaaagag cagattattt  
112921 ttctagctct tcttaagaa gaatatacct taagcaatga aaactcagta tctagagaga  
112981 taaattcttt actttcttta gtcagtgaaa atgatttggg aaaacataaa aataaaagct  
113041 tattgcaaga aatgctcct ctcttaatc tgatagagta tgatgagtat ttaaatgctt  
113101 ttggtgatat ttctaaaagt ttttttatta cagatgaaat tttgcaaaga attataaatt  
113161 ttgagccaaa gcaaaaataa aaaattaaaa tcgaaaatgt tttaaaagag caagatattt  
113221 tcgaacttat agagccaagt atagatataa atgatatcat catgcctcaa aataactaaag  
113281 agcttttgga aaatatctta aaacagcaag ataaaaaagt actcgaaagg ctaaattctt  
113341 gggggataaa aagcaataaa aacatagaag caaagattat tttttatgga cctgctggaa  
113401 cagggaac tatgtcagcc tttagctatgg caaaatcaat gaaaaaaaca gtacttagtt  
113461 ttgattgttc taaaatttta agcaagtggg tgggcgaaag cgaacaaaat gtaaggaaaa  
113521 tttttgatac ttataaaaat atagttcaaa cttgcaaaca aagtcctata ctgcttttaa  
113581 atgaagctga tcagttttta agcacaaggg ttgaaagtag cagtggaagc gataagatgc  
113641 acaatcaaat gcaaaaatatt tttttagagc aaatcgaacg ctttaatggt gttatcattg  
113701 ccacaactaa ctttttagaa agtttagata gtgccttttc gagaagattt gactataaga  
113761 tcgaatttaa aaaacctgat tttaaagaca ggcttaagat gtgggagaaa tttttaccta  
113821 gaaaagcgtc ttttgaaaaa gcatttgatg ttaatattht agcaaattac gaattaagcg  
113881 gagcgcaaat tttaatgggt gttaaaaata ctgccttaa agtagcgggt accgaagatg

113941 gagtatttaa aatgcaagat tttatagaaa gcatacaaaa agaattaat tccagcttcg  
114001 ataaaagtaa aattgtcggg ttttagcttt ttttaggttt taaaaatcct aaatagcgtg  
114061 ttgcaaaata aacaagactg agtattaaag cgctccattc ccaaaacata ggaactttag  
114121 gacttaaaaa ataatgatag cttgctagca ctaagcatac atagcctaata tttcttatct  
114181 tttcaattct tttaaaaact ctaaaagagc ttaaaaaacat aaaaaagata atgatgaaag  
114241 caaaaaaac accctgcttct aataaacgat gagagatatt atcaaaaagt cttaaaaagt  
114301 tagcatttct atcaaaaata aaataattta aaaaatgtaa aaatgcccaa aatgcagcaa  
114361 atattcctaa cagcttaggg tagcttttgg ttttttgaa tttgcataaa gaaaataaaa  
114421 ggcttaaatt taaaaaaatt aaagcaaaaa ttctgtata aatataagct tctttgacaa  
114481 aatcaaaggc ttttaataata tgataaaagc cataaatcaa gcttgctaaa aaagcaaaat  
114541 aggcaagaaa tttaaaatat tttgcgtgca ttagtaattt gcctttaaat ccatgcccg  
114601 ataaagactt gccacttctt tttcatagcc attaaacatt aaagtaggtt tggtaaaaa  
114661 gtctcctaaa gccctttcat tggcttgtga ccatctagga tgagatacat taggattgac  
114721 attagcataa aagccgtatt ctttggggc atatttttcc caagtgctaa taggctgctc  
114781 ttttacaat tctattttta ctatggattt aatgctttta aatccatatt tccaaggcac  
114841 tacaaggcga attgggtgcc cttttgtgg ttttaaagct tttttataca tacctactgc  
114901 aagtagggta agcggatgca tggcctcatc catgaggagt cttccacat aaggataatc  
114961 aacagttgga acaaaagcgt cttgatcagg gaattggttt ttatctaaaa gagtggtaaa  
115021 tttgataaat tttgcctcac tagtcggctt tgccatatcg attaaacggc gtagctcaaa  
115081 acctaccaa ggtactacca ttgaccaagt ttcaacacag cggaaacgat aaattctttc  
115141 ttctaaagga aattttaaaa tctctccat actaagactt aaaggctttt ctatttctcc  
115201 acttatatcg attttccaat tttgggtatt gaaattttgt gctaaagaga ctgcccttct  
115261 tttatctggt gaaaattcat aaaaattgat ataatttgtt gcaagctctt cgtcgtgat  
115321 ttcaagcttg tttgcatttg tatcgtttat aaaattttaa gcagagagct tagaagcaat  
115381 taaagaagag ccaattaaag ctctgctcc aagcttaaaa aaatctctcc tttgtttata  
115441 aagcttttca ggtgttataa tcataatttt tccttattaa aaatttttgt tattaacta  
115501 taacaatggt aatataggat taattttata tgattttttc aagctcgatg ttgtaaaata  
115561 tttcttcgca aaattcttta tagtgattga gtagttaa atcttgacggt tcttgacatta  
115621 gaatttttaa ttctaaattt ttttaatttt taagttcgtt ttttaagctt tcatccttg  
115681 gaaataataa aaaatattct ttaaagatga gctcataaat ttcaaaagtt ccatcaataa  
115741 gataattaat cgctttatca agatgtcgat tagagtcctt aaaattttaa ggattttaa  
115801 ccataaaaca aagatgaatc atagcaagat gaaaatactg aagacatttt tcaggcaatg  
115861 taaaaaagtc atttttttga aaattttgca aattgtttaa gtcagaattt agaaaatgac  
115921 agccaaagta ttcgtgaata tttgaaatca aatttttcat tttttgctct tcgtcaagct  
115981 tttttctaaa gcttcaaaaa taagctaagg ctttataaaa tctttgaaaa aattcaatat  
116041 gtttgtgttc tcttaggcaa ataagactta agtcttttgg agaagtagag tattcttgca  
116101 tataattatg aactttaagg gcgattttat ttcttactcc aagtaaaaaa ttttaagtctt  
116161 tttgttttaa aatttgatga tagaaaaata taaaatcctt aatcaagctt ttatgatttt  
116221 tttcaataa tgaaatttga aaatctacgc taagaaattg attataaaga ttaaaataat  
116281 cacattctaa ttgctgataa ttcaatattt tatcccgcac ttagtataaa attcttttaa  
116341 agcttgctcc ttatcaggtt gggttttgat ccattcttca aaatgattac acatatccca  
116401 ttctttttgc tgaattgctt cataattttg ctctatatcg ttttcgctta tttttttct  
116461 gtgtatttta tctaaaattt tttcacacac agctctagga tcttcatttt tatatatagg  
116521 cttcccaca acgatataat cgcttaaat ttctctagcc attgtaagat tagcaacgcg  
116581 tttttgatca tcgcttgttt ctccaaaagg acgaattcca ggagtaaggg ttaagaaatt  
116641 tgaacttgta tgctctttaa tttttttgct ttcaaaaacc gaacatacca taccatcaag  
116701 tccattttga taagacattc ttgaaaaatt aatcactgct tcatcgatat tttgtttata  
116761 aatgctataa aaattttctt catcaaaact agtaagtgtt gaaactgcta aaaccaagg  
116821 tcttttattt aagcgattga gtctagtcac tacttcttgc atagcgactt ttccagcact  
116881 tgctgggata ttgatcatat caacgccaag ttttgaaatt tcctcacaag catctgccat  
116941 ggtattggga atatcgtgaa ttttaagatc gagaaaaatt ttaaattcat cgattttttt  
117001 aagctcctct atgaatttaa agccatctct taaataagct ctttaagcca cttttaacca  
117061 aagatccaat ctttttaagt ctttagcaag tcttaaacat tcttcttttag tggcaagatc  
117121 aagggtaca cagagtttca ttgctttgcc ttaacaagag tgtctaaaac tccgttgata

117181 aatthttggag aattatcatt agcaagttct ttggcaagct ctatggcttc attaattact  
117241 atagcattag gcgtatctgt gaaaagtaat tcataggcac caagtcgcaa tatggctctt  
117301 tcgatatgtc ctaacttttc aatthtcattt tcgttaagat aaggatttaa attcttatct  
117361 atatcatcaa gattttttat aatthccttcg tataaactca gtgtaaaatt tttttgctca  
117421 ttgcggattt ttttttcatt tagaaattca tcaatgaaat tttcattttt ttcattcatt  
117481 tctagggcat aaagtaaaga gattacactt tgtcttactt ggtgacgcgt tgccattaaa  
117541 gttccttgct taaatthtagc atthcaataa cagttgtcat tgcttcaaag cttttatthc  
117601 ctgctthtgc tcccgtctct tctatggctt gttctatagt atcagttgtt aaaactcaa  
117661 agcttacagg gatgttatga tthaaagctta cattggcaat ccccttagta gtttctgctg  
117721 aaacataatc aaaatgtggg gttgagccac ggatgaccgc acctacaaa caaattgcat  
117781 caaathtttt actthctata gctthttttta aagcaaaagg aagttcaaaa gcacctggaa  
117841 caagtataag gctaagattt tcttctttgc caccatgtct taaaaaagca tctcttgcac  
117901 cttctacaag gcgatcgggt atgatgtgat taaatcttgc attgatgata gcaathtttg  
117961 taththgaatc taaaththaat tthccttcaa tgatagtcatt attaththcc thcaatgatg  
118021 tththgaattt ctaaaagcgt tthcacgcaa gctthaaagac ggttaagatc aagcatatta  
118081 ggcccatcgc ataaagcttc acaaggattg gtatgtgttt caaagaaaaa gccatctact  
118141 cctacagctg ctgctgtctt tgctaaaggt tctacaaaatt cgctthttcc tccgctactt  
118201 ccccctgagg ctcttgcat ttgcacgcta tgagtagcat caaatataac aggagcaaat  
118261 tcacgcatga taaccaaaaga tctcatatct acgaccaaat ttcataaacc aaagctagct  
118321 cctctthcag ctacaaaaat accaththttta tccgctactt gatagccttc thcttctatg  
118381 ccccgthgtt gaagtactth tthgacactg taththaatat cgctthggatt gagaaathgc  
118441 cctthttthga tathacttht cgcctthgtt thagctgtctg cgactagcaa atcagththgt  
118501 ctgcataaaa aagcaggaat ttgtaaaaca tcagctacct cgcttacagg tgctgcttgc  
118561 gtgctthctg gtatgtcgggt taagatcttc ataccgaatt cththtttac gctththtaag  
118621 atththaatc thctthcaag accagggcct ctaaaagaat taatactcgt tcgaththgt  
118681 thgtcaaagc thgactthaa ataaaaattct ataththcat ththcathaaa thctthgtaa  
118741 thththgctc ththaaaaac caaatccttg ththctataa cacaaggacc ggcaatgagt  
118801 atcathththt thathththt cththththt taaccaaaat ththccacca aaaataatgc  
118861 ctathatacc thaaaaaac atagcacttg gtaaatcatt gcccaaaatt ataccacta  
118921 tcatgctaaa gactacatca agatagctta tgcctgtctac aaccctgtct thththggcta  
118981 tgccataagc ththagttaca tgaaththgat aaatagtacc taaggcccc ataathggcga  
119041 tgatgagcca agctgtaaga ctaggcatta caaaagggtgc thaaataaaa thcaaatgta  
119101 aagcatcaag atgthththgt tcaaaaaatt cagcacttat catagagatt agaggcatta  
119161 agggccctaa aaagataaaa gaaaatgcaa ththgttccgt ggtataaaat ththctaaagct  
119221 ctcttacgct tgtaagagct aaggctgcta aaaatccgct cataacacct atgatggaat  
119281 ththcaaatc aaaacctgaa tgagththgagt thcttgccta aggtththgctg aththaaagca  
119341 ctccgctaaa tgcgathaaa atccccagcc agcctththgt tccgatatht thththaaaa  
119401 thaaataaagc ththaaagtg atgaagattg gagcggthth thgaaaagca aaagcaccct  
119461 ctagggtaat atththaaaca ththaaaaaa acatataaag cgaaagthgt cctgthtact  
119521 cgcgaaagac thaaagccaa aaatgtcccc thctththtg aactththgaa cgctththgta  
119581 gataaactat aaaaaataca ccgatgatat thctaaaaaa cataaththca atcgaactca  
119641 ththctthgct aagaaththt gcacaagctc ccatgagthg caaatccaag cacgctaaaa  
119701 thcaaaaaata aathcctaaa ththgctthga tgactththg catctththt thctthgatta  
119761 aaththggtt aathctagth ththththgct thaataththg gcaaththth ththththt  
119821 thaaaaaaat atacaththaa aathththatt aggtaaagcaa atgcaaaagca thcatacttht  
119881 aggtaaagcca aatgththgaa aatcaagtht atththacaga atggcaagac aaagaathgct  
119941 ththcaagth gaaaththcag gcactacaag agatactaat aaaacagaag thththththaa  
120001 thctaaaaaa gctthththg ththgaththgg thgtctthgat gaaagthaat agctthththaa  
120061 aaththththaa aaaaaththc thaaaaaththg aaaagaaagth gataththct thththththggt  
120121 thgaththgaaa ththagthctg atgaththgaa caggcagtht ththcathctt thgaaaaath  
120181 aggaaagcct atthgctctg thgaththaaa agthgaththaa aaaaaagathg aagaathgct  
120241 ththgggaatht gctathththg thgthaaaaga ggtthththaat ththctththaa thcaaatat  
120301 agggctagat gagctththata atthggctthga gaactththth gatgaaagath thththgctcc  
120361 thgaththgaaa gaaathththg aagathththt agagcathth gaagagggaa aagaaththca

120421 gtttaaagaa gtagatcaaa atcatatcag agtgggtata gtagggcgtg tcaatgttgg  
120481 aaaatcaagc cttttaaatg ccttggtaaa acaggagcgt agtgtgggtga gttctattgc  
120541 gggaaacgacg attgatcctg ttaatgaaag tatagtttat aaagataaag tgatagaatt  
120601 tgttgatact gcaggtatta gaaagcgagg taaaattcaa ggacttgagc gttttgcgct  
120661 aaaccgcaca gaaaagattt tatctaattc tcaaattgca cttttggtt tagatgctaa  
120721 tgagggtttt aatgagcctg atgaaaggat agctgggctt gcggcaaacg attatttggg  
120781 cgtgattatt gtattaaata aatgggataa aactgaattt gaatttgaca aagtggtaaa  
120841 agaattaaaa cttgatcgtt ttaaattttt agcttatgcg ccattgtca gtgtttctgc  
120901 ttaaagcggg aaaagagtgc atgttttatt ggaaaaaatt ttagaagtct ttgctaattt  
120961 tacgcaaaaa attccaacct caaaactcaa tgatttaatc gcaagcga ccaaagccca  
121021 tcctttaccg catgattatg gaaaattggg aaaaatttat tatgcagtgc aatatgattt  
121081 agcacctcct aaaatcgcac ttattatgaa cagacctaag gctttgcatt ttagctataa  
121141 gcgttatttg caaaatcaaa tcagaaaaga atttaacttt gaaggcgttc ctttggttat  
121201 tgcttcacgc aaaaaaggaa gcaaggaaaa tgatgaaagt tagaaatatt atttttattg  
121261 gctttatggg aagtggaaaa agcaccatag ctagagcttt agctaaggat ctagatcttg  
121321 tttttttaga tagcgatagt ttgattgaga tgaaatttga tcaaaaagtc agtgaaattt  
121381 ttaaagaaaa gggtgaggct ttttttaggc aagaagagca aaaagtagca aattttcttt  
121441 gctcttghta tggagcttct atagctagtg gtggaggttt tatacatgtt ttggactttg  
121501 ataaaatagg tttttgtgtt ttttaaaag caagttttga atatttaaag aagcgtttaa  
121561 gtgagaatga aattgctaaa agacctttat tttatgatga agttcaagca aaaagattat  
121621 ataatgagcg tctaaataaa tacgagcaaa aagcgaattt gattttagat gttgaaaata  
121681 aaagtattga tgagcctgtg atagaaataa aaaaggatgat aaaatgagag tattaacagg  
121741 acttcaacc agtggtgatt tacatatagg taattatttt ggcgccataa agcaaatggt  
121801 ggaagctcaa gaaaaaagt aaatgtttat gtttatagca aattatcatg ctatgacttc  
121861 aagtcaagat ggaaagaagt tagagcaaaa ctgcttaag gccgctgagg cttttttaag  
121921 tcttgggtata gatccgcaaa aaagtgtttt ttggttgcaa agtgatgtaa aagaagtaat  
121981 ggagctttat tggattttat ctcaatttac tcctatgggt ttattagagc gtgctcacag  
122041 ttataaagat aaggtagcta aaggcttaag tgcgtcgcat ggactttttt cttatcctgt  
122101 ttaaatggca gcagatattt tgctttttga tactcaactt gtgccagtag gcaaggatca  
122161 aattcagcat gttgaaatag ctgctgatat tgccttaaaa gtaaataacg aatgggggtga  
122221 aatttttact ttgcctgagg ctaagataaa tgaagagggtg gctgtgggtg tagggactga  
122281 tggggctaaa atgagcaagt cttatcaaaa taccatagat atatttgcta gtcaaaaggc  
122341 tttaaaaaag caaatttctt ccatagttac agatagtaca gccttagaag atcctaagga  
122401 ttatcaaaat tgtaatgttt ttaagattgc aaaattattt ttaaatgaag cagagcaaaa  
122461 agaattgcaa gttcgttatg aaaaagggtg cgagggttat ggacatttta aaatgtattt  
122521 aatgatcctt gtaaatgaat actttaaaga agcaagaatg aaatacgatg agttattaga  
122581 aaaaccttca catttaaaag aaattttaga attaggtgca agtaaagcta gaaaaatcgc  
122641 tcaagaaaa atgcaaaaaa tttatgaaaa aataggactt taaggagtaa aaatgcttga  
122701 tttgaaaaat ttacaaaata atttcgatga ggtagctaaa aagctacaaa ataaaaaagt  
122761 agatgaaagc atattaaata atcttgccga gctttttgca aatttgaaaa aagaaaaagc  
122821 gagtttggaa gaatttcaag cttttcaaaa taaatttagc aaagagttag cactgcaga  
122881 agataaagaa agcttgaagg caaaactcag tgaaaacaaa attaaaatca gcgaacagaa  
122941 cgcaagagta aatgctttgg aaaatgagtt agaaaccatt gcgcatgcta ttccaaatat  
123001 ccctgatgaa tgcgttcctg tgggtgaaga tgaggaagaa aatgttgaaa taaaaaagt  
123061 ttaaacacct cctcaatttg attttattcc aaaagaacac catgatttag gagagagttt  
123121 aaattggcct gattttgtga ggggggtaaa aatttcacaa agtcgttttt gtgtgcttaa  
123181 aaacgaagga gctttgttaa gtcgtgcttt ggtaaattat atgatagatt ttaaccgaag  
123241 tcgcggtttt gaatttghta atgtacctt tttggtaaat agtgctacaa tgtttggcac  
123301 aggacagctt ctaaattta aagacgatat gtataagata gacgatgagg atttgtattt  
123361 aatctcaact tctgaaattc ctgtgacaaa tctttatagc ggggaaatct taacaagtga  
123421 aagtttgcct attaaaatga cttgttatag tgcttgtttt agaaaagaag caggaagtgc  
123481 agggcgcgat acaaggggta ttatccgtca gcatcaattt gaaaaagtag agcttghtaag  
123541 cattactaaa cctgaacaaa gcgatagtgt ttttaatgaa atggtagaat gcgaggtga  
123601 tttgctcagc tctttaggtt tagctcatag acattttagt ctttgtactg gagatttggg

123661 ttttagtgcg gcaaagacaa tagatcttga agtatggata ccatcgcaaa ataaatatcg  
123721 tgaaatcagc tctgtttcta attgtcgtga ttttcaagcg aggcgtgcaa aaattcgtta  
123781 taaaaatgaa aaaggaaaa atgaattagt gcatacttta aatggttctt ctttggcagt  
123841 aggtagaacc ttggttgcca ttatggaaaa ttatcaagat aaagaaggta aaattcaaat  
123901 tcctgatgtg ctgaaaaaat atttttaaag agtgtaaag gcagataaag aagatatagt  
123961 tcttgaaaaa cctgaagata ctttaaata gaagaagatt gatgaaagtt tgggggaatt  
124021 taaagggcaa gaaggtcagg ctcctgaaga tgaagaattt acgtctttac cagatgagtt  
124081 gcctagagaa aatagcggta gtggttttaa atttacaaga gaaagtgcgc cagaagaaac  
124141 atcaactttt gaagaagtag aagaagatga gcctactcca tgggtataagg atcgcaaatt  
124201 tatgtccctt gtgggtttgt ctttgggtat tatttgtatt ttggtattta ctttatttta  
124261 tttaaccttt aatgatggaa aagtcaagcc tgatatcatt gcaacaaagc ctattgaaca  
124321 gcctgtaatt atgcctgatg agtcttatga ttataatgat atgacaaaag ttgatgggat  
124381 gatacaaaaa gcaaatgcgc tttatttaaa ggggtgaagt gagcaagctt taaaggttta  
124441 tgagcaaat gcaagtttata atgagtcctt gtctaattat aacctagggtg tttctcaaat  
124501 gaatgagggg aaatttgatg aagcttttga aagttttaaa agggcaatag ctaatggaga  
124561 aatcaaagt gtagcagcta ttaatgctgc tgtttgtgct ttaaagctta atgataggga  
124621 gaaatttaaa tattatatag atttagcaca agtttatctt ctaaagagg gaaaatctaa  
124681 attgtatgat tattatttgg ctttgattaa ttattacaag ggttattatc ctgaagcctt  
124741 gcaaatgctc caacgtgtaa attcagagcc ttatgcggat gtatctaaat atttatcagc  
124801 taaaatttat gcaaaaatgg attttgatgc aaaatccgtt cagcaattaa atacccaagg  
124861 aagttttgaa cctagccttt ccttggggct tttgtatgca agaattgggag aatacgataa  
124921 ggctaaaata gccttaaata cagcaatgaa aattgaaaga gattttaacc aaagtccttc  
124981 agccttaact ttggttgata ttaaaacagg ggattttcaa gatatgctat tgcgcttgca  
125041 aagcacatat agaaatgatg aagataagta taaaatttta gatagatata agatcaaggt  
125101 tcgtttgaac aaggagttat ttaatataac catagcacag agaaatttt ctaacgatat  
125161 cttaaaaaaa caaaaagatc agtttgattt gcttttttat tttgcgctt atcaagtttt  
125221 tgattctaag caagcctcac tttatattaa aaaagctaat attacaaatt ttgtagatga  
125281 tagttcggat ggtcaaagct atttggctac tagcaaagcc ttatcttca ctaatgttaa  
125341 aattgctaatt attatcaata acgcattaaa tcaaaaatta agactcgcaa accaagaatt  
125401 tctagctttg ttggaggatt atcctgagca tagtattttg caatataatc ttgctttaac  
125461 ttatgcacag atgcaaaact atgagcttgc ttataagcat ttttctagtt cttatcatct  
125521 aaatcctaaa aattatttag caggtgcttt tgcgatgtt tgtggaaaat tgagtataa  
125581 tgataccact aaactttatc atgaaattct tgataatatt gcagccgatt caaattttaa  
125641 agccaatatg caaaaaata tgctgtttt agctaattggc gattatgttt ctatgttgcc  
125701 ttatttggat gagaatgggc aaaaaacacc tttaaatctt atttttgaag ctattattgc  
125761 aaaaaataat aatcttaata atcaagtaga tgtaaaaatt gccaaattaa gatcagagct  
125821 tccacaagat attgtggcaa atattttgta ttttaattcc ttaaattcaa atttaaatat  
125881 taaagagtat gctcaaaatg cccaaattca ttttaagaat ttgcaagttg attaccgtag  
125941 tgtttttgga ggttcaaata ttgctagggga attgtatggt aatttaatgc atattgcagg  
126001 acttttaaat ttagaaagac aaaaatftaa aacactgatc aatacctcta aggttaaaga  
126061 tgagggtatg gtacagactt tagcttattt agatattttt gcgcaacagt atgaggaatc  
126121 ttatgcctta tataatattt taatcgatga atacggagct aaggatgcta gaactttgtt  
126181 tttagcctct gtggctgctg tgggtgcaaa taatccaaat tcagcaattg ctcttttgca  
126241 actttcaaaa cttacagata aaaatagtaa ggaaagtaaa gtagctttag gtttgcttta  
126301 tcaagaagta ggtaattacg aagcagctat cacgcagtat agaactttac ctaatgcttt  
126361 taagagttaa ttttttactt ttgatattaa aaatcaataa gatgtttggt aagatccaaa  
126421 catctttatt atgctttaag gtctaaagtt tttccgcaa gttcatcgat acgatcgcta  
126481 acttttttta ttgttgcttc gattgtatct tgactgattt gaggaagctc tccgccccaa  
126541 attttttctg cttgctcaaa tccttgcttt ataccttcta gtccttttt aagcttttca  
126601 acatcgtttc cagcaccttt tatgacaaaa tcagcaatac gatttgctgt gttgtcaata  
126661 ccaaaaaatc cctcttcgct gatgagctga ttgagttcat cagtgttcat tgcaagtggg  
126721 tttttgcat tataaccaa agacgcaaag tcaatatctg aaagcataga ctttatagag  
126781 tttaaatcat tgcctcctaa aagattgtta atcccagctt gagcattgct tgtgtttaaa  
126841 acagtactca tagtttgttg ctgaaattgc actagataaa tttgactaat acccttgcca



126901 ccaagagcat tgagcttgtc taggacatct tgatttgaat tagcactttg aacgtttgtg  
126961 tcttttgtgt tagtatctgc cttcttattg ctaacctgag cttgtgctat actagcgaca  
127021 tttgaaaaag tatttatttg ctttctgct ctttttata atgaggctaa tttgtatatc  
127081 gactattttt atttgaattt tagatcagat tgaatataggc ttaaaaattt taagcctatt  
127141 taagatagta agcaatttgt tcttttgcaa gtatgcgtat aagattactt gtgccttcta  
127201 ctccggttgg aaaacctgca gtgagtaa atgcatttatc tttatccata aaaccttttt  
127261 caacgctaga ttttacagaa tctctaagca aatctgttaa atcttcactt ttattaacta  
127321 aaatagcagg ataacaccc caaactatgc ttaaagaatt taatgttttt tcagaatgag  
127381 ctactgctat aatttccata tttggacgat atcttgcaat tttaatagca gattttccac  
127441 tactagtcaa ggaaaaaata gcatcagcgt taagatctgt cgcaagatgt gcggaagaac  
127501 gcatgatttt atctgtattg tcaagattta caaattcgtt aaatttgttta taaggatagc  
127561 gtttttcagt ttctatgata gtttgacaca tgatatcaac tgcatttgct ggatctatac  
127621 ctactgcact ttcttcgcta agcattacag catctgtccc atctaaaaca gcattagcaa  
127681 catctgaaat ttcagctctt gtagctgttt tgctttttgc aagagaaaaa agcatttgtg  
127741 tagctgtgat aacaggtttt gaagcattat tggctttgtg gatgattgct ttttgtatat  
127801 taggtacttt ataataagga acttctatac caagatctcc acgtgcgacc attataccat  
127861 cgctagatgc tatgatttca tctatatattt ctaccgcatc aaatttttct atttttgcaa  
127921 atatagagat tttagcatta ttttgagcta aaatttcacg aacttcatca atatcatgag  
127981 ctttttgaac aaaagaaata gctaagaaat ctactccatt ttctataccc caaagcaaat  
128041 ctttttgtc cttttgtgtg atgacatcga tattgatttt tgtatttggga aaattaatac  
128101 cttattttga atttaaaaa ccatcatttt ctataagggt ttcaattttt tcattatcct  
128161 tggcagtgac ttttgctttg atcgaacat catagagata gatgtattca tctagtttta  
128221 gcatatttaa aatttcgctt tgattaatgc taagtttata atgatttggga gtgatttgtt  
128281 cgcctataat tttttcataa taaaaatcaa gtttatcacc ttttttaagt tcaaaaaggag  
128341 ttttttagctc tcctgtgcga atttttggcc cacttatatc ttgcaaaatt cccacacgag  
128401 tgtttaagctc tcttgaaact ttgcgtatgg tttcaagatt gtttttatga tattcatgtg  
128461 ttccatgaga gaagtttaaa cgaaaaacat ttacgccatt gattatcatc tggcgcaaaa  
128521 tatcttcttt ttcgcttgct ggtccaactg tagccacaat tttagttttt tttagcatac  
128581 tgttctcctt tttttgttta attataatca aactttggaa acaaaaagac tacaatagtt  
128641 ctgaagcaa tttatcctcg tcaaatttag ccctaaata ttcacacata agcttagcat  
128701 ctctttcagc attacctaaa cagcttgttg ctccaggact tggggtcata ttgaaaataa  
128761 ttccaggagt ttcggtgata cttgcttcgc cttagcattaa ttcccctttg gttttatcaa  
128821 ttacttgagg gcggactcct ccaaagcct ttgcataata aatatcgctt gtttttaaac  
128881 taggaactat ttttttagca tcttttacia ataaacctt atcgataaaa ggtaattcaa  
128941 aaagatagtt ataaagtata tagtttctaa tcgttggatc tttaaacata ctaaaagtaa  
129001 cttttaaacc gtttttatca agttttaaag cttcaaaaaa cttaggaacg gatttttaaac  
129061 cgtgatagcg ttcaagtttt ggaataacta gtgcagtagg accaaaacga gtattcatat  
129121 ctgcaagcaa atcaggatct ccatgaaggg ctgcaaaagg taattttgga ttttgcacca  
129181 tatagacttt accattgagt aatttttgtt tggttaaata aaagcttct gctacaggcc  
129241 aacaagattt atccataccc aaattcattt tatgtgctag atataaagaa tgcgcaccag  
129301 catttacaac tacagcttta gaacggtatt cttgataagt atttgtttt aagataaaaa  
129361 tatcgtcttt tttttctatg tgaacaattt cttgattgaa agctacaaag gtgtttttac  
129421 cttgtttttg tccttgttca attaaacttg cactcatttt cccaaaatct actgtggtaa  
129481 aaacttctcc agcttcaacc cccatggcac agatattttc aggtctatca tctataccat  
129541 tttctccaag agctacttta ggttcgattt gtttaatttt ttctttatca aaaaatttca  
129601 tataaggata aagttcgcca aattcttcat ggcgtttttt catgtactca cattctgtat  
129661 cgccaacggc caaggccatt ttttgatgag aaaacataaa ttgattctgc gcattttgca  
129721 aaagcccata ttttactatc atatcagcag ttcttttaac ttttttagct ttttctagag  
129781 tgtagtttgt ttcgatatct ccacaatgaa tagtttgaga attgcttgtt cttttagaat  
129841 ttaatgttgc aggagcatga tatttttcta tcaaagcaat atttttaata tcagtgatc  
129901 ttgcaagctc ataaaaataa gctgctccag aaattcctgc tccgatgaca attacatcga  
129961 attcttgttg agtcattttt tttcctttt ttgcttctag caaagttaat ttttctaaat  
130021 aaaagtgtaa tccaatttat tttataaaaa gttaaaattg attgagaat atgcaaaatg  
130081 agaatttttg taacattgaa attaaaaaag tagatttggga ttttcttcta taatcttctt

130141 cattcctcta aaaatgagaa gtttatcgta aatagcataa tcaaaataat ttgctaaaa  
130201 ttgccatct ccaccgtaa aataaagttt tttatttgt gcagcatctt tgataagcaa  
130261 ataaatactt ttaaaccacc cataacttaa ggcacgctt gtttttgcg ggaaagcatc  
130321 aagactgatt tgagtattga attcatgttt taatctaggg gaaatatgag cataaatttt  
130381 tctataatta gcaatacctg gcaagatgaa tcctcccaag tgtatggaat ttgatactat  
130441 atctaccgta attgcactac cagcatctac tacaaccca tcttctatag tgtaacaagc  
130501 tgcaatgcga tctacacca aaccctgata aatagtatca aatacaaaat agggttcaag  
130561 atttataaag tttttacgtg cttttaaatg ctctttgatg tgttcattaa cattgatata  
130621 aaaaattttt tgttcacttt taaattctaa aaattgttct atgctaaggg taaaaattt  
130681 attatcgtct aaaaaactag cattggaatt gccaatatca caaaataaca tgaatacgaa  
130741 atcctttttc ttcaaggtaa tgttttgctt ttgagcatag tgggcttttg gtaaaaaaat  
130801 atttgtattt tagattaaaa ctatttgcta agttatctac aaatacagca tctttattaa  
130861 taaatcttgc ttttcctgta tatattaa gtaaattttc atcattttaa gcacaaagat  
130921 aagttttctt ttttgtaaa tttgttaaat caaaaggttt taaatctagt tttaaaacct  
130981 tcattgcttc atttaaaata ttcataataa atctaaaatt ttatttccat aataaaactt  
131041 tccattacc ataaaagatg tttttcaac tgcgtttgga agttcaaaga tttgaatatt  
131101 ttcaaaattt agatcacatt tgattaaata gcctgttttt tcaaaagtgt aaagatggtc  
131161 attgtgtatg ctaacttttg taaatatagc aaaatcaaat tttttctcag tgattttcct  
131221 tagattataa tctgttttta tgatattgcc attttttct aatataaata ttgcattatt  
131281 atcaaatgca atatccttaa tatcagcgtc taaataaaga gttctagcag ggcttactac  
131341 tataactttt ttagctgttg cagctatcat tttatcatcg cttatcccaa ggtgaatgac  
131401 attattaaaa aaactttccg ctgaaatcac tacatctttg acaacttcaa aagtattttt  
131461 tgacacaatt ataatttttc catctagagt tggatagata ataattttgt ctaaaaagat  
131521 aggatttgca acgcgactat cttgcgctgg tgcgggtgtt aagttttggt taaattttat  
131581 acccaaagag cgattggcta aaacgatgct attatttgct aagattagtg ctaaatcatc  
131641 tccatgtaaa gctatgcaa gaactgcagc atcaaatttg taagaataaa cttcatcgtg  
131701 agagctatta taaatcttta aatttccatt atcgtccgct tcgataaatt caccttcttg  
131761 atatgctaaa agcatataac ctttatctag tttaaaatct tcaattatta tatcattttt  
131821 taaaattatt tgattgtttt tgagttttgc tgaattgta ttccagtcta taatgctagc  
131881 ttttaagcta tcgttagaac ttagttttcc atcagtttgt gaaggttcaa agtattgtct  
131941 tttgtttccg caagcgcaa gaaaaataag gcaaaatgag attaaaaca actgcctcat  
132001 tgggaaatac cttgataatg ttttaagatt ttagcaattt gacttagagc tgagtcatct  
132061 ttaatttgag aaagtaaaat attagcttgt tcgatttttc cttctcctaa aagtctataa  
132121 gcttgtaaaa ttttatcgta attttttaa aatatggatt tttcccaa agaaagagaa  
132181 gcaatatttt taagcaaatg atttgtatca gaatgagtac ttagggtttg tagttggctt  
132241 ttaatctcag tattattaat atcttttgct aattctttca ttaaaaaaat tgcataaagg  
132301 ttggatattt tatttttaag ttgttcaaga agtactttat cgtttgggtt ctttaataaa  
132361 tttgtataaa ttttattact ttcttcaaca ttatattgat caatttttcc acttataaag  
132421 cttatggcaa accatacaat taaaattgct ataagtcaa atatatataa tttatacttt  
132481 cttataaatc tttcaccttt gataaaattt tcaatgaatt gttcttcggt attgatttct  
132541 gcttttacag cttttaaatt atcttttaat cccaaaattt attccttgta atttttaatt  
132601 ttaaaaaact gcagtattgt atcatataaa ttacaaaata tcctaaaca tttaaagctt  
132661 tttatgatat aattttaaaa attgacttta ttttagtaag gtttaggatg caaatagatg  
132721 aaaaattgct tagcaactt gaaaaactaa gtgctttgca aattgaagaa gaaaaagaa  
132781 gcgaagtgat tcgcaactt agcgagattg tgaattttgt tgagaagtta aatgaattgg  
132841 atttaagctc ttcagaagtt acaatcagca ctattaaagg tggaacacct tttagaagtg  
132901 atagtgttaa tagtagcagt gtggtagaaa cggttttaaa tcatgctcca aaaagcaatg  
132961 atcatttttt cattgttctt aaaatcattg agtgattaat ctagtgtttg gttcttgttt  
133021 gtataatttg taattttaag tgatttttaa atgcttggtt aggtgaatta aaatatggaa  
133081 ttttactggg ttgatgcttt tatttttaggt tttacgctac ttttgggtct taagggtatt  
133141 gtaaattgggt tgattaaaga agtatttggc ttactcggga tcattggcgg cgtttatatt  
133201 gcttcaaaat ttgtttcgca agctacaaaa tttattcaaa atactttcta taaaatagaa  
133261 aatcaaagct tggctgagtt tgcaggattt ctagcgactt taattattgt ttggataatt  
133321 tgtcttatac ttggcaattt tctttccaaa ttagttaaat taagcggttt gggattttta

133381 gatcgcttgg gaggatthtat ttttggagct gcaaaggtgt ttttcatttt tgcaatttta  
133441 gttttttgta tagcgcgctt tgatthttta aatgataaat taaatcaatt tgcccaaaat  
133501 agctttacct taactcctct taaaaatata gggtcattta taatgaatca gcctctagcg  
133561 gcaaatggct tgggtcaaat tgatcaaaat ttgcaagata ttagagacga ttttaagtact  
133621 actcaaggag aataaattat gttgattgag aatgtagaat acgatgtatt attagaaaga  
133681 ttttaagaaaa ttttacgaca aggcggctctt aaatatacca aacaaagaga aatthtactt  
133741 aaaaccttgt atcatagtga tacacactat actcctgaaa gtttatatat ggagattaaa  
133801 caagcagaac cagatthtaa tgtaggcatt gctacggttt atagaacttt aaatthgctt  
133861 gaagaagcag agatggttac ttctatatcg tttggttcgg ctggaaaaaa atacgagctt  
133921 gcaaacaaac cgcatcatga tcatatgatt tgtaaaaaatt gtggaaaaat tatagaatth  
133981 gaaaaatccta ttattgaaag acagcaagct ttaatcgcaa aagaacatgg tthtaaaactc  
134041 acgggacatt taatgcaact ttatgggtgta tgtaacaatt gtaatcaaaa agctaaggta  
134101 aaaatthaat gtttgacaat atthttagaac aacaaagaat tcaaaaggct aacgagthta  
134161 aaaacgtagg agtaaatcct tatccccatt tthttagthta agaactthct ttagcagatt  
134221 ttaaaaaagaa atthtagctat atthtttgata ctgaaaataa acgtgatgaa agtattthctt  
134281 cagtcgthttc tggacgthta aagctthcta ggatagctgg aaagtctata tthtccaata  
134341 tagaagatga gagtgaaaat ttgcaaatth atthttagcaa agatthctthta ggcgaggaaa  
134401 aatthtaatth atthtaaaaa aatctthgaag taggtgatat tathctthgca aaaggctthc  
134461 cthttgttac taaaacggga gaatthtagct tgcatgcaag tgaatcact ttagcaacta  
134521 aatcaatagt gccattgcct gaaaaatacc acggacttac ggatgtagag caaagatathc  
134581 gtaagcgthta ttagatathg attatgaatg cagaggthtag aaaggattht ttagctgct  
134641 ctaaggthgt aagthtgatt cgtcacttht tcgaagaaaa aggctththta gaggtthgaa  
134701 ctctatgat gcaccaat gcaggthgtg caaatgctaa acctthctgta actthctata  
134761 atthctthtag agthtgagaga tththtaagaa ttgcaccgga actthattthta aaaagacttg  
134821 tagtaggtgg cthttgaagcg gthtttgaaa tcaatcgtht tthtagaaat gaaggtatgg  
134881 atctthacca taatctgaa tthtactaaa ttgaatthta tthggcttht cataattata  
134941 aagatthtaat ggatctthacc gaagaactth ttgcctthgct tthtagaaaaa ttgcaatthg  
135001 gaaaaatcat agaatthgat ggacaaaaaa tcgatttht taaacttht gagagaatta  
135061 cttataaaga tgcgctthaa aaatathgtg cthttgathga tgagattath gaaaaataag  
135121 ataagattht agagaaatta aaaaaagath gcctthgaagc aatgataag cthgattthg  
135181 gacatthtaca agctgagctt tthgataat atgtagaaag taagctthatt gacctactt  
135241 ttatcacaga tthtccaata tctatthagcc cactthctcg tcgtagtgac aaaaattcgc  
135301 agatagcaga acgctthgag cthttthgtg gtgtagaga actgthctaat ggtthtaatg  
135361 aatthaatga tctthtgat caatathgaa gathththaa gcaaatthgag gcthaagacg  
135421 caggtgathga agaagctthgc gaaatggath aagatththgt aatgctthta ggatathgta  
135481 tgccaccaac agcaggacaa ggtathggga tagathagatt gthaatgctt thaaacaaata  
135541 aaaaatctat tcgagathgt atathgtthc cagctathgag gccathaaaa acagathtaa  
135601 aggagataa agaathgath tagagcath ttgataaagaa atthttgath taacthaaca  
135661 agathtagtg cgtcaathgt aaggtctthga aatgathgca agtgagaath tcactthgcc  
135721 tgaagthath gaagthathg gaagcgttht aacthaaaa tathgcaag gthtathcagc  
135781 thagathath tathggagct gthgaththgt agathgaaat gaaaatthtag ctathgaaag  
135841 atgthaaaaa cthththaat gthgththtgc aathgtgcaa cthaatthcag gctcthaagc  
135901 thathcaaggc gththathgct cactththaaa tccaggtgath aathththtag gaathgathct  
135961 aagctathggc ggacaththaa cacathggtgc aaaggthagth tathcaggaa aathgthgta  
136021 gagctththt tathggtgthg aactthgathg aagaathaac tathgaaaag thtagaathat  
136081 tgctathath gthaaaacca agctthattgt atgcggtgcg agthctthath ctgthattath  
136141 thgthththca aaththtagag athathgcgga tgaathtgga gctthathctt thcgathath  
136201 tgcathath gctgggctthg thgthgathg cgagcacccha agthcaththc thcagctca  
136261 thgthgathg tcthaaccc athaaaactt acgtgthtcca agaggtgthg tathcathgac  
136321 thathgathg gagctthgct aaaaaathaaa thcagctath ththcaggth tccaaggtgg  
136381 accathgath caththathc cagcthaagc thgthgathth aathththath thtagcgaaga  
136441 atgghaaath tathgccaagc aagthagaag caathgcacha gctthtagctha aggtththath  
136501 ggathgaaag thathagctthg thagcathgg aacathgathat cathctthgtg thathgathct  
136561 ththggagcgc gaththcathg gaaaagathgc thgththgct thgggthathg caggaaththc

136621 agcgaataaa aatactgtgc ctggcgaaac tagaagtcca tttgtaacaa gtggattaag  
136681 gtttaggaaca cctgctctta cagctagagg ttttaaagaa aacgaaattc aaatagttgc  
136741 caactatata gctgatattt tagatgatat tcaaaacact catttgcaaa aagaaatcaa  
136801 ggaaaaactc aaaactcttg caagtaattt tataatctat gaaaaggcaa tgttttgatt  
136861 tcacctatgg atctgtcgcg gattaaaata attagcgatc attactatat acgacgcgat  
136921 aagattatga aaaaaataac acatcgaggt cgtttatfff ttgataaatt tgaaggatt  
136981 gacgctcctt taaatttaaa cataatgaga gaacatgcag caaagaaaat tgttgttgct  
137041 catgatttga tcaccaaaga caataaggta gaaaatattg tttttgatta taatggtttt  
137101 aatgctgaaa gattttatca tcgtgcgcag cttatfffgc gtgaagaagg ttttataaat  
137161 tttacagctt acaaaacgaa gactccaggt catttacatc tttatattca caaaggctat  
137221 actgcattaa atgaaggtta ttctttagcg tctaaactff caatgatgft tgcaagtaaa  
137281 atgccagttg aatggaaggf gtttccaagt atggatattc ctagagagft taatatatta  
137341 atattgccct acgaagtcta tcaaaaagaa cgaggcagft cttggftcta acatatgtaa  
137401 gaaaggaata ttatggaaaa taataagaat gaatttgatg acattatfff ggaaaaaagt  
137461 aataaaaagt aaaaaatgaa aaaaattctc ttacgcgfta ttgctttggt aatfffatft  
137521 ctagtgatta tgatagtgat gaaacttatt aatagtggcg aagaaaatgc tgaaaatcaa  
137581 agcattttac caagtgaacc tttgaaata acgcaagata ataatgctga ttcttttgag  
137641 agtatgccta tcaactgaaa tacttcagct gaagatcaat ttgaagcctt aagaagacag  
137701 attcaagggg agcaaaatga taattcttca gtatcgactt ctaattctaa tgcaaatgat  
137761 aatatcaatt taactgtacc tgatcaagaa gtgcctgctg aaccaaatac gacaaattct  
137821 gaaaaagtag cacctftaaa tactacagct cctaagcaag aagtaaaaca ggaaagcaag  
137881 ccgaaagaag aagtaaaaca gactgttaca aaaaaggagc ctgcaaagca agcaccaaaa  
137941 caagaaacta agcaagaatc aaaaacaaat gctaattgat tgtftaaaaa tgtagatgct  
138001 aaactgtttc atccaaatgg cttggcttct ggaatttatg ttcaaattat tttagtaagt  
138061 aatfttagatc aaaagtcaag agagfttagca gccgtaaagc aaaaaggcta tgaatataag  
138121 ctttataaaa ctacagtagg cggaaaagaa atcactaagg ttttaatagg gcctfttgaa  
138181 aaagcaaatg ttgcaacgga gtttagctaaa attagaaaag aagtagctaa agacgcctft  
138241 tccttcactc taaaatgaaa tftfttagctg ttattggftga tcctatctcg cattctaaat  
138301 cacctagaat tcataacaat gccattcaag ttctftaaact tgatggftatt tacacacgct  
138361 atcatctaca agattatcat caattaagac aagattftft taagftaaag cttcaaggcg  
138421 caaatattac tttgccatft aaggaagtag ctttggaat agctgatgftc aaggatgaaft  
138481 ttgctcgtaa tatcggtctc gcaaatactt tgtgtftaag agatggaaaa atfttagctt  
138541 acaatacaga tgccttaggt tftfttagaag ccattaaaga atftgaaggft atftaacaag  
138601 ctttgatftt aggagctgga gggactgctc ttgctctagc atftgctfta aaacaaaagg  
138661 gtgtagaggft ttgtgtggta aatcgtagtg aaaaaagatt taaggatftt actctatata  
138721 aaactagctc ttatgatgct ttaggftgatt ttgattfttga tfttagtgate aatftcaactt  
138781 cagcaggcct aaaaagatgat gattftgcctt gtgataaaat actftfttagat aaaatftfta  
138841 gtagagcaaa atfttgcctft gatgttattt atggcaaaga gacttctftt tftaaattga  
138901 gtaaagagca taactftaaa acaaaagatg gattftgatat gctcttatgg caagcagftt  
138961 ttgcctfttga actftftftt gatgtftaaag ataaaaagaga aaagattftaa aatgcatgct  
139021 aagaagctct aaagctagaa tctftaactft tctftaaaata atftaaatatt aagagaaatft  
139081 agaacgctat tgccaagtgg caatagctag aatfttaagaa atftattcaaa aatgataacc  
139141 ccatcttgat tfttgtfttgt gttatfttca tattgtatat ttgaattftga agatgtfttgc  
139201 tcttgaaaag aaatatcttg tgaattgtta tctaaatftt gttcttgagg taaatfttct  
139261 tcaaagattg tgttggftatc aaaatgatta aagccgctag aatcagftatt gctatfttggft  
139321 acagftfttct ctatatctgt ggctftttagc aggttgtftat agagcgtatt taaagftatft  
139381 ftataaaaaat gftaaaaagct tfttatctatt tcaaaagccg gttfttctaa acctfttatta  
139441 agfttgtgtgg gftactgttga aatagftagft tftaaacatat ftattccatc tfttggfttfta  
139501 ataggataat tftaaatctac caaagagtca agfttggftat ggcttgttag atftggfttga  
139561 tfttgagggt tatgctgate aataaaatca atfttctctt gaaatfttaat tcttagatftg  
139621 gattftaatag atftctcact catgaaatta tftgattftt gtatattftt tcttctata  
139681 agaagctfta cftaaactftt aagggtatag tcaggatftg aagfttactat tfttagcct  
139741 tftaagctgtg ctatggfttft aatftgttct tcaaaatftt cftftftaaag agcacttct  
139801 ttgtcgategc gaatftftaag tacagagftt tcaaaataat ctgaataatft atftatfttgt

139861 tctatattta taggttctag catgattgaa accccagaat ctataggctc cactttggta  
139921 ggggtttgag gcttgaaatt aggcattgaa acatgcacaa aattattgct agcaccactg  
139981 caagcagcta aaaataaagc aataacaaat aagaaatatt ttttcatttt ttaaccttta  
140041 agataagaaa ttatgtttaa ttatagcaag ttaaagtttt ttgctatat ttttataaaa  
140101 taaataatgg aaaaagtatg gaattttggc aaaaatattta ttcaaatttt gatgtttag  
140161 ctttttagtgt ttttaggttt aaagtacatt ggtatggaat tatgtatggt ttagccttac  
140221 ttttagcctt acttttagct aaattttttg taagaaaatt caagttagat atcaatgaaa  
140281 aacgcctaga tagctatttc atttgggtgg aaattggcgt gatttttagga gcaagacttg  
140341 gatataattt aatttatgat gcacatacta tgtattatat tactcatcct tggcaaat  
140401 ttaatcctta tgcaaatggt gaatttgtag gcattcgtgg tatgagttat catggagcaa  
140461 ttataggatt tttaatagcc acttttttat tttgcaaaaa atataaagaa aatccttggga  
140521 aatttcttga tttggtagct ttgagcgtgc ctttagctta tgtttttggt cgcataggaa  
140581 attttttaaa ccaagagctt tttggacgca ttactaatgt acctgggggt atttatgtgg  
140641 agggagtttt aaggcatcca tcacaacttt atgaagcctt ttttagaggga gttgtgggtt  
140701 ttatcgttat ttatctggta aaaatgaaac aaaaatttca aggtgaactt attcctgttt  
140761 atgcttggtt ttattctttg gcgcgctttg tgtgtgaatt ttatcgtgaa ccagattttg  
140821 gtttgggctt tttttttgg ggtatgagca tgggacaaat tttgagtttg cttatgtttg  
140881 tagcagcctt gttattttat atttgcataa agtttaaaaa agtaaatatt taatgtgtat  
140941 taaaggctat tgtactataa tgaagagatt ttttaaat  
141001 atgagtgagc ttatcgaagg gtatttgggt aagagcattg atggcaaaaa aagtaaaatg  
141061 cctgcaaagt tagattttat ccaaagtgct tctgggcttt ttctaggtct tttcatgtgg  
141121 gtacatatgg tttttgtatc tactatcttg gtgagtaagg atttttttaa ttccgttgct  
141181 cattttttgg aattaaatt catttataac gatccaatga tgagttatat tacctcattt  
141241 tttagccgct gtgttttggg ggtatttttt gtgcatgctt tattggctat gagaaaaatt  
141301 cctattaatt ttcgccaata ccaaattctt agaactcatg ctaaaaaaat gaatcatggt  
141361 gatacttcat tatggcttgt tcaagcattt acaggttttg taatgttttt cttaggttct  
141421 gcacacttga tttttgttat cacaaatgga gataaaat  
141481 agggatgatca atcattttat gtggcttttt tatatcgcac ttttaacttg tgtggaattg  
141541 catggtagta tagggcttta tagactttgt gtaaaatggg gctggtttga agcaaaagat  
141601 gttaaagata ttcgcaagag tcgtaaaaaa ctcaagatgg caaaatggat aatcagtatt  
141661 ttcttcttgg ttttaggagt ttttaagtctt gcagcatttg ctaaaattgg atttgaaaat  
141721 tatcaaaatc aaacaactgc aatggtaaaa acttataatg gagcaaatta tgaatattca  
141781 atatagtgat gcttttagtaa taggcggagg ttttagcaggc cttagagctg caatagagg  
141841 ggcaaaaagt ggtcaaagt taacactttt aagtatttgt ccagtaaagc gttcgcactc  
141901 tgctgcggtg caaggaggta tgcaggcttc tttaggaaat ggtgctaaag gtgaaggcga  
141961 taatgaagat ctacactttg cagatacagt aaaaggaagt gactggggtt gcgatcaaga  
142021 agtggcaaga atgtttgcac aaaccgctcc aaaagctggt cgcgaacttg cttcttgggg  
142081 ggttccttgg actagggtaa ctaaagggcc aagaacggtt gttattaatg cacaaaaaac  
142141 tgtaatcga gaaagagaag aggctcatgg actcatcaac gctcgtgact ttggtggaac  
142201 taaaaaatgg agaacttgct atatagctga tgctacaggc cactgtatgc tatatggcgt  
142261 agctaatgaa gctatcaaac atcaagtaaa aatcatcgac agaattggaag cggttagagt  
142321 tatccatgat ggcaaaaaat gcttgggtgt aattgcaaga gatttaacta atggacaatt  
142381 gattgcttat attgcaagag gaacaatgat agcaacgggc ggttatggta gaatttataa  
142441 gcaaaactaca aacgcagtta tctgtgaagg aacaggtgca gctatagctc ttgaaacagg  
142501 actttgtaga ctttcaaata tggaaagctgt acaatttcac ccaacgccta ttgttccaag  
142561 tggaaatttg cttactgaag gatgtcgtgg agatggtgga attttacgcg atgtggatgg  
142621 atatcgtttc atgcctgatt atgagccaga gaaaaaagaa cttgcaagcc gtgatgtggt  
142681 aagtcgtaga atgatggaac atattagaaa aggttaagggt gtaaaaaagtc cttatggtga  
142741 tcatttatgg cttgatattt ccatacttgg tcgtgcacat gtagaaaaaa atcttcgtga  
142801 tgtgcaagat atttgtaaaa ctttcaatgg catcgatcct gctgatgaag gtccaaaagg  
142861 ttgggctccg gttttacctg tgcagcatta ttctatgggc ggcattagaa caaaacctac  
142921 aggtgagagt caatggttag atggtctttt tgcttgcggt gaagcagctt gttgggatat  
142981 gcacggattt aaccgcttag gaggaatag ctgtgctgaa actgttgttg cgggtatgat  
143041 tataggggat tattttgcag attattgtaa aaataatgga gaagtcattg atacaaatgt

143101 agtaaaagac tttttaacaa aagaatatca atatttataaa tcttttggtag acaaagaagg  
143161 taaatattct gtttttgaaa ttaaaaatag aatgaaagaa atcatgtggg ataaagtagc  
143221 aatctttaga acagggtgaag gcttaaaaga agctgttgat gagcttgaaa aactttataa  
143281 agaatctcaa aatgtaaaag tgcattgtaa agaacttgac tgtgcaaacc ctgagctaga  
143341 agaagcttat agagttccaa gaatgcttaa agtcgcactt tgcgtagctt atggggcggtt  
143401 attaagaacc gaaagtgcgc gggcgcacta tagagaggat tatccaaaaa gagatgattt  
143461 aaattggatg aagagaactc taacttattg ggtagaaggt gaaagcttgc ctcgtgttga  
143521 atacgatgaa cttgatatta tgaaaatgga aatgccacct gcattccgtg ggtatgggtgc  
143581 taagggaaat atcatagaaa atcctttaag tgaaaagcgt caagctgaag ttgatgcaat  
143641 ccgcgaaaaa atggaagccg aaggtaaaaa tcgtcacgaa attcagcatg ctttaatgcc  
143701 ttatgaatta caacaaaaat ataaagcgct aatcaaaga ataggagtgg attatgagta  
143761 gaaaattaac gataaaggcg tttaaatata atcctttaag caaaatttca aagcctcatt  
143821 ttgtaactta tgagcttgaa gaaactcctt ttatgacagt ttttgtatgc ttgactttaa  
143881 tccgcgaaaa aatggatgcg gatttgagtt ttgactttgt ttgtcgtgca ggaatttgcg  
143941 gatcttgtgc aatgatgatt aatggtgtac caaagcttgc ttgtaagact ctaacaaaag  
144001 attatcctga tggagttatt gagcttatgc ctatgcctgc atttagacat attaaggatt  
144061 tgagtgtcaa tacaggcgag tggtttgaag atatgtgtaa gcgcgttgaa agctgggtgc  
144121 ataatgaaaa agaaaccgac atttcaaaaa ttgaagaacg catagagcct gaagtagcag  
144181 atgaaacttt tgaacttgat cgttgtatcg agtgtggaat ttgtgtagct tcgtgtgcaa  
144241 ctaaacttat gcgtccgaat tttatcgag caacagggct tttagaaca gctagatatt  
144301 tacaagatcc gcatgatcat agaacagtgg aagatttcta tgagttagtg ggtgatgatg  
144361 atggtgtttt tggatgtatg tctttattag cttgtgagga taattgtcct aaaaatttac  
144421 ctttacaag taaaattgct tatatgagaa gacaacttgt tgctcaaaga aataaataat  
144481 attttcccct taaaaagggg aaaattatga aagaattact ccaaaaactc tggcaaaatg  
144541 aactccagct tttagatttt aatgcaagct ttaaagataa aatatttctt gatgttgcg  
144601 aacttgctat aatattaagt gttaacaaag acaattatga aagatatttt ctcttaaaag  
144661 aatttggcaa tatttghtaa aaaattgatt taagagtaga ttttttagt attcaaaaag  
144721 ctcaaatttg tgttttaaat atgttttagag aaggttttat acctaacaac gatttghtaa  
144781 aagccttgcg aattttgcaa aaaatttcaa acaatactga aattttagaa tatatacaaa  
144841 atattcaagt tcaaagcgtt gataaaaaag ctttgtttca aagtggtttt aatgagctta  
144901 atcatatcaa tatagagctt agcaaattga gttttgatga aaatagtaaa ataagacttc  
144961 aaaaaacttt ggaaaaatth caaaaattag aattcaatat agctataaca ggggttatga  
145021 attcaggaaa atcaagtttg ctcaatgcac ttttaaaaga ggatttttta ggtgtttcta  
145081 atatccctga aaccgcaaat ttgactttac taagtattgg caatacccaa gaagctgtga  
145141 tttatttttg ggatactcaa gaatgggata atatattaaa aagttccaaa tttagcaagg  
145201 aattaaaaga atttatcgat gaacttgcct taaaagttga tataaaagaa tatgttcaag  
145261 ataaagcttt aacgcaaaaa attaatthaa atgaactcaa ggatttttagt tctgctaaaa  
145321 accaaatttc tgctcttatt aaaaagatag aatcaaaaag taatttggaa tttttaaaaa  
145381 acaatatctc tatagtggat actccagggc ttgatgatat agtcgtgcaa agagaaattc  
145441 taactaatga gtatctthaa gaaagcgatt ttttaatcca tcttatgaat gcttctcaag  
145501 ctthaacaca aaaggatgct gaatttttaa tccattgttt attgaattct cggcttagca  
145561 aatttttaat tgtccttact aaggcggatt tgttaagcca aaaagattta gatgaagtga  
145621 taaattacac caaagaaagt ctttaaggcta gacttgaaaa ttttgacacg catttgatag  
145681 aaaagataga ttttttatgt gtaagcgcaa aaatggcaag tgatttttac aagggtttat  
145741 cttctgaaga aagctthaa aaaagcggta tgaaagaatt tgaggaatac ctttttaatg  
145801 agctttattc tggagaaaaa agtaaaatta ttttacaggc ctataaaaaa gaattgcttt  
145861 tagagctthaa aaatattthaa aatgaatatg aaatgcaaaa taagcttata aaagaagatg  
145921 gacaaggttt aagtgaagaa aataataaac ttttatcgga atttaaaagcc aaagaagaag  
145981 cgcttaggga agcaaaggaa gagattthaa attctatttt aaatcttgag aattttgaaa  
146041 atgggggtgga taatcttgtt ttattattgg ctaaaaaact caaagagcgt ttgattgatg  
146101 aaattaaata tttaaaagat aaagctcaaa aaattaatat taatcgtatc ttaaatatga  
146161 tagatatcac ggtthaaagat ggtattaatg atattthaa agaggthaaa tttgaaaata  
146221 ttaaaaaaat agaagaatta aaaacaagtt tggctthaaa atatgatttc ttaaaagatg  
146281 attttgacaa tggatttgaa ggctthaaag acgaaatttc taaaaagata gaaaatattt

146341 ttagcgatga aaaatthtga ttgttaagac tgcaaatacga gcaaattatc tctactaaag  
146401 ccgattttgtt tgagcttgaa acaagattaa cagaagtgat ttttagcact tttgaaagct  
146461 ttaatatagg tgctatatta aaggatttgg atatcaatgg cgcctttttt gctttcttga  
146521 atgaaagaat ggcaaattat gaagtgttac aaaaagaaaa gctagcgagt attgaacatt  
146581 tgatcaataa tcttaaaaaat caaatgtctg acatthttatt ttcttatgag gaaaatthgg  
146641 aaaaaattgc aaaattacaa cagcttgaag tggagcttat gaatgcaaat taatatttta  
146701 aatcattttha taaaggctta tgaagatgcc tataatatag atthttgataa aagthttgaa  
146761 gggcaaatta aaatgctatg taaaaaacta aacgagcctt tcatgcacc aagctataat  
146821 ctactcaag agcttgaaga attgagthtt tctttagaaa aaaatattaa tattgctatc  
146881 ataggtcaat thtcaagtgg aaaatccacc cthttaaatt taatcctaaa aaaagaatgc  
146941 ttacctacag gagtgggtcc tgttacttht aaacctactt thttgctgta tgcggatgaa  
147001 tathththtaa gagttgaatt tcaagatgga agtgatgaaa tcaactatata agaggagttg  
147061 gcaaaatata cagatcaaag aaataacata aaagaaacaa aaagthtgca taththtgca  
147121 cccatacctt tgcttaaaaa aatcacctta gtggatacc caggactgaa tgctaatgaa  
147181 gatgatactt taaccactct aaaggagctt caaaatatcc atgcggcgat thggthtaagc  
147241 ttgattgata atgcaggaaa aaagagcгаа gaagacgcta taaaggcgaa thtagagctt  
147301 thgggcгаа acagcatttg tgtthtaaat caaaaagata agcttagtac tcaagaatta  
147361 gaaaatgtat taagthtgc caaacagtt thttctaaat atthtaaga attgattgcc  
147421 atthcttgca aggaagcaaa agatgagaca aaatataaag aatctaattt taatctthta  
147481 ttagaththt tagatagctt agatgagaaa gctthtaaac aaaaatthac aaagagaaaa  
147541 atgcttcatt tgtgtcaagt thttagaagat gaaaataggc thtttgthga taththtgac  
147601 aaacttgthga atcaaththca aaththtcaa gagaaathaa atthctctth tgatgathth  
147661 ataaaaagaa thcaaththt aaatcatcaa atthtaata agctthaaag tathggthga  
147721 agaathgcaa gtgaaathth taathgcaat aaagaaaaag aggtcattt thacaaagaa  
147781 gctaaggggt ththgaaaaa ggaththtat gtaaaatagc atthataaagc thctthtatc  
147841 tcgagtgatg atgctththt ggcaatgtht tataacagcg atataatgaa taaagaatth  
147901 aaaaaaatca aaaatgaaat thtatgaaat thtgaaaaa taaaacaaaa atthgaaagat  
147961 thtatagaca atthtagaaaa agataththt cththtaag ccgaaththc aaatatacaa  
148021 aaagatcata thctgcaaag tgataaaaaat thtagcgaac thtaggcttht thgcaatgca  
148081 agtgatgagt actththtaaa agactthtaaa gagctththt thaaaagtht ththggagthg  
148141 gaththththt thgaaaaact aaatctcaa gctththgcaa atthtgaaaa tgctacaaaa  
148201 thaaagctthg cathththtag tagaaaaatc aacgaaagtc gagthcttht tgagthggat  
148261 agctcggaat thactcttht thatcttaag aagagthgaaa thtatgagag agththtaacc  
148321 gaactcaatg thtatgaatt tgaagctthg cthtatcaata agccgathth agthaaaaata  
148381 thcaatcatt ththtagaaca aaataaaaaat ataaththgag aaaaaataa aatctthagct  
148441 thaaaaaaag cagaaththga aaaacgcaag gagcaathth cagaagthag aagthgthttg  
148501 aaggaaaatt thtgaggata thththcathh thctththatt ththcacact cthththgctg  
148561 thggacgathh agataatgct thaaaggctth atgagggaaa thaaaththgta aaagcatatg  
148621 aaathththga aagactththg gaaaaagata atgctaaagc thgthththct thtagctthata  
148681 thaatgaaaa tgctcaaggg gthgcaagag atththtacaa agcgtataaaa ththtatgata  
148741 agthctthgcaa actthgththt gctaaagctt gthctaatat ggctthtaacc thacaagatc  
148801 gaggtthtgt thaatgaatct cththtagcat thaaacaaggc thgthaattht ggctgathctt  
148861 caagththgaa ccatatgggt thggththtag aagatgaaaa agatggthcaa atggctacac  
148921 atthththataa aagatctthg gathththaaag atgctagagc thgththataaa thtaggcttht  
148981 thgtacgaaaag aggagagctt gthaaaggcaa atctthaaatc ggctthtagct thththattcta  
149041 aatctthgtac ththaggththt ggagaggctt gthaththgat cggacgthth thtagctthg  
149101 agaaaaaaga ththgaaaaag gctaaagat atththggtht ggctthgtgac aaaaaacacc  
149161 aagaagctthg thgctgcttht agaaagctaa atthctcaaga thatagaaatt thththaaata  
149221 thcatcaaaaa thathththt aagaaactaa acthaaathg atththgathth thththgthatt  
149281 thgthgathg atthgtaccaa thgaaaththcg aaagthcttht ththgthththg cthththcgga  
149341 gctatctthta gaactththg ththththgtht aagaththct thgththctth cgththctthc  
149401 thththctct thgtgctthct gcgctthtaag thththgthgct thgctctthg cththcaatthc  
149461 caththththaa gcathththgag cgactctgth atctthgctgga ctaggatcgg caggtgcat  
149521 ggccgctgca acaactthgac gcgcatthtag ththgththct thgagththc thctthththg

149581 cattccttata ggaacttcac ctgctgtggc atacatttga ttatcaggtc ctcttgtgta  
149641 actaaaactt gcagcccctg ccaaaccacc tccagcagct tgatgcgctg cttcgtgagc  
149701 ttttacattt ctatctatgc tttgaagttc acgcacttgt tgtacttgtt gcatagtaag  
149761 ttcaactccg tttatcattt gagtttgttc gttattttgc tttgggtctt tattttgcga  
149821 gtttgtgttt tctgtatttt cttgtgcggt attatttttt tgtgtattgt caaaagaaga  
149881 gctgctaata taattgtaat ttaaattaat ttgcattttt cctcctttgc ttttttgtat  
149941 attttagaaa tattaacgca ttttgactta aaaatttgat aaattttgta aaataacaat  
150001 caatacaatt ttaaaggaag attaatgatt tatgaaaata aatggattta tatagaaaaa  
150061 gaagaatctc aagtaccatg gattaaaatt tttaccaagc aaatctataa agaatttagt  
150121 gattgtccct atgaacttca aaaagaaatt tttgataaaa ttttgcgttg tgaaaaggct  
150181 atgatagaat tttacaaacc tgaaaaaatc aatattgctt cttttgcaaa ctatgttcca  
150241 agagtgcatt ttcatgtaat ggcaagattt aaagaggatg ctttttttcc agaatgtatg  
150301 tggggcaagc agcaaagaga attaagggat ttaaatttac ctagttttga tgaatttgtg  
150361 atttttctta aaaataaaat ggactaaaat tatcattaat ggttgattgt tttttgttta  
150421 atagaattct tcttacataa aaaatacaaa aaaaggaaaa aaatgaaaaa aattttatta  
150481 agttcccttg ttgcagcttc tttgctaagt gcaggtttat ttgctaaaga atttacttta  
150541 gataaaactc aactgatgt aggtttttaa atcaaacatt tacaaatcag caatgtaaaa  
150601 ggaaattttc aagattatga tgcggtaatc gattttgatc ctgcaagttt tgaatttaaa  
150661 aaacttgaag caacagttaa agtagcatct gtaaatcacag acaaccaaac aagagataat  
150721 cacttacaac aagatgattt tttcaaagca aaacaattcc ctaatatgac ttttghtaatg  
150781 aaaaaatacg aaaaaatcga caatgaaaaa ggtaaaatga caggaacttt aaccatagca  
150841 ggtgttttcta aagaggtggg tttggatact gaaatcggcg gtacagctaa aggcaaagat  
150901 ggtaaagaaa aagtaggttt ttctttaaat ggcaaaatca aacgctctga ttttaacttt  
150961 gcgccaggca cttcaactat tacttttaggt gatgatgttc atcttaatat cgaagttgaa  
151021 gctaacgaaa aataattttt aagccttaga gttttactct taggcctttgt aaattctgat  
151081 tcaaatttcc ttctttttct ttccatacaa gtttaaatc gggtttgaaa atttcatttt  
151141 caagttttaa ttccgtgttt tttaatgtag attctaaaaa agcaagatgt tttaaagctg  
151201 tatctttgtc atcaaaaatt aaaacaaaat cattttctac gataaaaatt tttgctttaa  
151261 agcgtttttaa aatttttgca atttgtttta gaataagctt gatatatatt tcttgagtat  
151321 ccttaaattc gctaaagtga agcaaagcta tagtgtaaga atttttacct ttgataaagc  
151381 gattgagatt tttttcatta ggaagtttgg ttagggtatc aaaaaatgcg atttttagg  
151441 cttgataaat caaataaaag caaaaaacca aacttgcaaa ttcaaaaata gcaaaacccc  
151501 aaaaactttc aaataaaaat tgaaaatttg ctcccaaaaa agctaaaaaa agatagtttt  
151561 ctttgctttt aaaggctttg atgattagga taagtgaaat aaacataaaa aataaaaagc  
151621 taagctcact aagaggtcta aaaaaactta aatttaaaaa atgaaaattc aaatttgcag  
151681 cgctaaaacc ggtatttctt ggcaagaaaa agcttaaaag tattataaaa ataagtaaaa  
151741 tcgcagagct taaatttttt tgttctatta taagttttcc catttgtttg acgctaagta  
151801 aaataaaaaac caaaggcaaa aataaaagaaa caaacaatg tgcttgaaag gtacttgtat  
151861 aaagataggg cagatgaaaa ataaacaagg cgagtgtaag aaaaaaaatt cttgtatttt  
151921 tgaaataaaa tgccaaagca agtgctaaaa attcaaaaaa tatactaaaa atacttaag  
151981 attgcaataa aaacatttaa taaaacctta aaattttaaa gataaaaagta gaaattgtat  
152041 agaaaaaatc ttaaaaattg gttttatttg aatttattga ttataattg agattttttg  
152101 gcatatgaga tattgagcga tctattccat ttgtgttttt ttaaatttgg catataagtc  
152161 aataacattt aaatcacttt ttaaaacttt cttttctgca ttttcgctaa atttggcaag  
152221 tttgtgaaaa ttttcataac tttcgttaat tgcttcatca atagccaacc cttgtagtat  
152281 tacgcgataa agatttggtc tagttttttt ccaatttcgt aaagtttgca catcaacccc  
152341 caaaaaggca gccatatctc gttttgtcat catttctctt tatattgttt tttgaaatga  
152401 taaaatataa gttttttaat tttatatata ataataatta tgcttaattt ataaaaaaag  
152461 aataaatatt attgttttta agatttatta aagtttttta aatttataat ttggagtaat  
152521 ttttatattt taaggagaac taatggaagg cgtaagtggc ggatctattt ttgtaacaat  
152581 gttattgttt gtattataca tgttaccgcg tattattggg ttgagtagaa agcattctaa  
152641 ttggctgata atttctttgc tgaatttgtt ttttggttgg acttttattg tttggcttgt  
152701 gtgtttaata tggcttttta caggaagttt taacaaaact attattatca aataaaaaaa  
152761 tgaaaaatag gagaaaaaat gacaaaattt ttaagtgttt gtggtttaat tgtggtattg



152821 ttaaattggtt gtggaggcga ttttcctggg cagccaagtg atgtggttaa ggttcaacaa  
152881 aataaatact caacaactgg gaatttaaaa gaagaaattc cttacaataa agagtcaagg  
152941 atacatggaa taaaaagaac cttttatgat aatggccaac taagaacaga agagaactat  
153001 aaaaatggaa aaagagatgg ggttagcaga gaatattcta aagatggaca acttttggaa  
153061 gaaatgaatt ttaaagataa tcgtggatat ggtgattatg ttggctatta tgaaaatgga  
153121 aacattagag caaagggtaa attacttggg tttgatgaag atggaatgca agagtttgaa  
153181 ggtaactata aagaatatta tgaaaatggc acttttagctc ttgaatataa ttttaataat  
153241 caaggcaaaa tggatgggtt gcaaaaatcc tacaatcaaa atggttcctt ggagagtgaa  
153301 gaaagttaca aaaacggaat caaaaatgga attttttagat actataaaaa tggtgaaatt  
153361 attaaagaag aagagtttac aaatggaatt ttgataccaa aatctaaaag ctaaaggagc  
153421 aatatgttt aaaaaagtga ttttgttttt atttatagga tttatatacc ttcaagccaa  
153481 tccattggaa caatgcgata atgctaaaat tatttcaagt cttaaaaagc aaattcctat  
153541 tgaaatttt aaaaatatgt atgaattgtc aggatttaaa gctcaaggaa ttgattacga  
153601 atcttatgaa aaaagtatga aagaaatggc taagcattat ggaaaaacaa attatactga  
153661 tatgattgaa attaattcca tttcaaattt tgttcttaat tctgattctt gcatggttat  
153721 ggtaaatgct atcttaaagg gggaaaatag aaaaggtctt tggagcgtta cttataaagt  
153781 tttcagtgca aataaagtaa aaatttcaga attagcttat gtcaatggag attttaata  
153841 aggcttataa aaaattaagt aatgagaaat cattgcttaa ttaaatttta ctactcaatt  
153901 aacttcaagt ctttttctgc tacaatttct taaaaattt tataagtaaa aaattgaagg  
153961 aaaattatgg ttgaagttaa aaatcttact atgctgtttg caaatcaact cttatttgaa  
154021 aatgtaaatt tgaaacttgt tcgctggccaa agatatggac taataggagc taatggtgca  
154081 ggaaaatcta cttttttaa aattctttcg ggcgagatag agtcaagtag cggagaagtc  
154141 gtctttgatg aaggattgag aatagctgtt ttaggtcaag atcaatttgc ttttgaaaat  
154201 tataccatca aagatgctgt aatgtgtgca aataagcgtt tatatgatgc cttaaaagaa  
154261 aaagaaaaac tttatatgag cgaagaattt acagatgaga tcaacgaacg cttaaagcag  
154321 cttgaaatga taacagctga agaggatcct aattatgatt gtgaaacgcg ttgtgagaaa  
154381 attttaagct ctttaaaaat caaagatttt gatgctttga tgagcacctt gcaaagtgca  
154441 gataaattta aggttttgc tgcgcaagta ttgtttttgg gcgagatgt acttttttta  
154501 gacgagccta caaataacct tgatttagaa gctgatttct ggcttgaaaa tgagctttta  
154561 agacatgaag gaaccttggg ggtgatttct catgataggc atttttttaa taaaatttgt  
154621 acaagaattt tagatgtgga ttttaaacaa attcgtgatt ttgctggaat ttatgatgat  
154681 tggatatgag cttcaacact ttttagctaaa caagctgaac ttaagcgcga taaaacttta  
154741 aaagaaagag aagaattaga aaattttatc cgccgtttta gtgcaaatgc ctctaaagca  
154801 aaacaagcta caagtcgctc aaaggctttg gagaaattag agcttgaaga gattaaaatt  
154861 tcaagtcgca gggatccaag tatagttttt agaacaaatc gtgaaatagg aaatgaagt  
154921 ttagagctta agggatttag taaggcttat gataaagaat tgttttcaaa tttagaatta  
154981 aaaatcgaat aaaaatgaaa aattgcttta attggtgcaa atggtgtagg caagtcaact  
155041 ttggctaaaa tcattgctaa tgctattgct cctgatagcg gttctatgca cttggagcgc  
155101 actatagaac ttggatattt tccccaaagat acaagcaatt taatttgtga aaatttgaaa  
155161 ctttacgaat ggcttatgag tgaaaaattc aaagatttgg atgaaattcg aaagtgttta  
155221 ggtagaatgc tttttatgag tagtgatcaa gagaaaatgg cagcgagctt aagcggagga  
155281 gagaagcatc gtttgatgct ttcgctttta atgctagagc gcccaaattt tttacttttg  
155341 gatgagcctg ataaccattt ggatcttgag agtatcatag cccttgggtga agctttgtat  
155401 aatttcaagg gtgttgcact ttgcataagt cacgacaggg agctagtttc tgcttttgcc  
155461 aatcgtattt ggcacttaaa agatggagaa ctgactgatt ttcgtggaac ttaccaagaa  
155521 tttttaggag aaaatgatgg ctaaatttag aattcagtat agcgcaggct ttggacattt  
155581 tacccaaaat cataaaggct ttggacctac tttttatata gaagaagtgg tggaaattga  
155641 taatggtaag gattattttg attatataga tttttacaat acttattcaa aaagcgtatga  
155701 tacttatttc catatcagtt ttttagagga tagacctta agtgataaag aaatcactat  
155761 acgtaatgaa tatcgtaaaa tacgctgatga aaattgcaag agagcaaaag aagaatttat  
155821 aagagataat gaacttgatg tagaacattt accaactcat ggtgattaag gaacactttt  
155881 tgcttgata gtttttgc attttgaaag gagaaagcta tgcaagtaag ttataaaact  
155941 attagctcat atgaatatga tgcgattagt ggtcagtata agcaggtgga taagcaagta  
156001 gaagattatt cttcgacttc tgattctgat tttatggata tattaagtaa attagaggaa

156061 aattcgggta cttctagcac ggaagaaaat ttacaaaaca atacccaaag ttcaaactct  
156121 aattcctctc aatacgcaca aatgtcaagc atgtatgctt atcgttttag gcaaaacgag  
156181 ggcgaaacttt ctttaaaagc tcaaagtgcg agtgtgcata atgatctttt aaatcaaaat  
156241 gcaaatggac aaaataaaga cagtagtctt ttgggtgatt tactcaatgc gatttaaatt  
156301 aaagcctcaa acgaggcttt aagatagatt ataatttctc tatttcaaaa ggtgtaaatt  
156361 tgggtgcaaaa gatttcaaac ttttgctctt cctcttcggt taaatttaag tttaaatca  
156421 ctttttcatt tttaaagtct cgctcaaatt ccaaagagtg agttcttaaa aaatgttcga  
156481 agcgattgag atttttaaaa tctatggcaa ttttgatatt ttttttaaat tcaaaagtta  
156541 gcaaggaggc attgttaatc gctgcatttg ccgcatcact ataagctctt acaagtcctc  
156601 ctgtcccaag tttggtgcca ccaaaatc ttacagtgat gactgcagta ttgataagtt  
156661 catatcctct taaaacgttt aaagaaggta tgcctgaagt gccttttaggc tcgccatcat  
156721 cgcttttatc ttctatgatt tgattgtatt catttaaagt tcgataagca taacaaaat  
156781 gaacggcttt ggggtgttct ttttttaaat ttacaagcaa atttttaaaa tccttaaaag  
156841 ggcaaagata ggataaaaa gtagatTTTT taatttcaat ttgtgcttga aaaatttgat  
156901 caattgtttg cattttcgcc tttttatTTg gtattatgat taaataaggt aaaatataat  
156961 gtattaataa aatttttaaa aatatactat aatttttcaa aaattaagga aagaaatgtc  
157021 aaaaacaagt caaaagaatt caagttataa aattttatgag tttatcatag agtctataaa  
157081 agaaggaagt ttaaaaccta atgatagaat aaaagaacaa gatatcgtgc agcaaacagg  
157141 ctttagtaga acacctatac gcgaagcttt aggacttttg caaatgatg gaattttggt  
157201 acaagatagt aaaaaagggc ttgttgtcgc tggacttgat ttgatttcta ttacaaaatt  
157261 atatgaaata agagaattac tagaaggcga agcagctaaa cttgctgccc aatatgcttc  
157321 ttcacggag atagaaatTT tagaaaatat agttcaagct caaaaaata tcacagaatt  
157381 aaatgaatta aaatcaaata atgttttatt ccatcaaacc ctatcctggt gttcaggaaa  
157441 tcattatTTg tataaaatta tggaaaatTT agatcgtcc ttattgcttt taggagatag  
157501 cacttagct aaagaaaatc gtgctaaaga agcctacaaa gagcaccttg ctgtttaga  
157561 agcaataaga aatagagata ttgcaaaagc agaagaaatg gctaaatTTc atataaggca  
157621 ggcttataaa gtacgtttaa gtaatatTTt aaatcaatca tagatttata actcatactt  
157681 ttattattct cacactagaa ctttcaaaaa attaaacttt caaatTTctt aaaataaaac  
157741 aatcaaatat ttagtctTTt aatattTTtTg aatattTTtTt aatattTTtTg tgtaaataatg  
157801 taacttaaaa aatactTTtTg tatgcaaaaa gatattTTtTg tatattTTtTt ttcaaaaact  
157861 agtttataat gaaaagaaaa aaggaggtTg catggcaaca aggtctaaaa gtgatgctaa  
157921 aaccattTTt agtgtggcta gtggtaatTTt tttagaaatg tatgattTcg cagtttatgg  
157981 tttttatgct gcttttattg ctaaagtatt tttccagct gaaaatgagt tcatttcttt  
158041 aatgcaaagt tttatggcat ttgggtgTggg atttttgatg cgtcctattg gagctattgt  
158101 tcttgatct tatatggata agtatggtag aaaaaagga cttgtttTaa ctttaggcat  
158161 catggctTTa ggaactTTa gtatagcctg ttgtcctagt tatgagagta taggaatTTt  
158221 agctcctatt atcgtagtga ttggaagact tttacaaggt tttagtgcag gtgctgaggt  
158281 aggaggagca agtatttatt tagccgagat tgctcaaag catttgcgtg gtttttatgt  
158341 gtcttgGcaa agtggtTccc agcaagtagc cactgtTTtTt gcaggTgctt taggtgtgct  
158401 tttgcattat cttgtaggag atgcacttat gcaagctTgg ggatggagaa ttccttttat  
158461 tatcggTtTg ttggtTgtac cttatatTTt ttatataaga agaactTtTg atgaaactcc  
158521 tgaattTaaa gctaaaattc atcaagcGcc aaaaacctta ggagcaatat ttcaaagcat  
158581 aagacaaaat atacctattg tttttttTgg aattatgtTt gtaatgatga caacggtaac  
158641 tttttacttt attacagctt atactccaac ttttgctaat aaggaactTc attttagcaa  
158701 gcttgaaagt tttgcaatta ctaccattat aggtgttagc aatactTTtTt ggttaccttt  
158761 ttcaggatat ataggagata ggataggaag aaagcctatt ttattgactg taactTTtTt  
158821 aggtgtgatt agtgcttatc ctatgtTaaa tttcttaacc aataatatct cttttactaa  
158881 tttggtTata gttgaattat ggttttagTtTt tttttTggt gcttacaatg gagctatggT  
158941 tgtatcatta tctgaaatta tgccaaaaa tgtaaaagcc ttaggTtTtTt ctttttctta  
159001 ttctatagcg gtggcaatTTt ttggaggctt tactccagcg atttcaactt atttaataga  
159061 aaaaactgat aatcctgctt cacctgcatt ttggtTgact tttgcggcac tttgttcttt  
159121 aattgcttct ttagtgatat ttaaaaaggg cggaatTTtTt gaaagacagc aaaaaggaga  
159181 gtgaaatgga atttgatata gtagttatag gaggggGaaa tgcagcactt tgtgctgcaa  
159241 tatcagctgc tagtaaagga aatgtTaaa tagctctTTt ggaaagctct ccaaagagT

159301 ggaggggtgg gaattcacia catacgagaa atttacgctc gatgcatgac gctcctacgg  
159361 atgttttggg tgaagttat agtgaagatg aatTTTTTga agatgttttt aaggtaacta  
159421 aagggcaaac caatgaagaa tatgCGcgtt ttgttatctc tcatactcca caagctgtag  
159481 aatttgcaaaa aaaatacggg gttcgccttc agccttcgat gcgtggaact ttgcatttag  
159541 gacgaacaaa tgctTTTTTT ctagggtggg gaaaatcttt ggtgaatgct tattttaata  
159601 cagctcaaaa tttaggcgtt gaaatTTTT atgaatttga agctttggat ttggttatag  
159661 atgagggttg gtgtaaagaa attttagttt tagacaaaaa acaaaataaa gaattaaaat  
159721 tcaaagcaaa ggcagtgatt gttgcaagtg gtggTTTTga gtcaaattta gaatggctcg  
159781 aagaagcttg gggagaaaag gcaagaaatt ttattatccg tggtagacgc tttaatcaag  
159841 gtaaaatgct aagggtttg caaaaaatc atgctcaaat tataggagat cctacacaag  
159901 gacatatggt tgctattgat gcaaggactc caaaatatga tggaggcatt gcttcaaggg  
159961 ttgattgctg gtctttgggt atagtgggta ataaaaaagc acaaagattt tatgatgaag  
160021 gggaggattt ttggcctaag cgttacgcaa tttggggtcg tttggtggca aatgaggaag  
160081 atcagattgc ttattcaatc acagattcta aggtgcaaaa atgttatatg ccatcacttt  
160141 ttgagcctat agtagcaaat tcaattgaag atttagcaat caagataaat ttagacccaa  
160201 aagctttaa ggcgacactt gatgagtata atcaaagcgt tgtagagggt gagtttaatc  
160261 aactataca agataattgc tatacacaag gtttgaagat agaaaaaaca cattgggctt  
160321 taaagattaa tactccgcct ttttactgct atcctttgCG tccagggtgtt acttttactt  
160381 atatgggggt aaaagtggat aaaaatgcaa gagtttatca agatgatggc gaacttttta  
160441 aaaatgtttt tgctgccggt gaaatcatgg cgggcaatat tctaactcaa ggttatgtcg  
160501 cgggttttgg tatgagtata ggaagtgttt ttggcggttt ggctggtgaa aatgcgtatg  
160561 atttaataaa ggaagtataaa tgaaaattac aaaaatttat gaagatgcaa ataaatcttg  
160621 cattatatgc aattcttgtc gttattgtga aggactttgt gcagtttttc cagcaatgga  
160681 aaaaagcgt gaattttctt taacagatat ggattattta gcaaatttat gccatcagtg  
160741 ttcagaatgt ttttatgatt gccaatagc gccccgcct gaatttaatg tttccattcc  
160801 taagcaattt gctgcactta gacaatatag ctatgaaaaa tactcttttc caaatttttt  
160861 aggaagtgca tttagaaaaa atgcgggtttt aacaactata gttttaattt tatgtctatt  
160921 ttttggtttt tggagtgcta gttcttatga tggcgaaagc acaaatggta acttttttgc  
160981 tgtagtttca tatgaatata tggttagtgt ttttagcata gtttcccttc tggtttgtat  
161041 cgcacttttt ggcgggatta ttaaatttta tcgtgccatt gaaattaaaa atgtaaatTT  
161101 caaagttttt gttcaaagta tcaaggatgc aatgacatta aaatatcttg gtgggcataa  
161161 aatgagggtg tgtacttatc ctaatgaaaa gcgttcaaat ataagaaaaa tatttcatca  
161221 ttttacagct tatggttttt tttttgttt tatagctaca tgtttgggtg cgatttatca  
161281 tcatttttta aatttggtag caccttatga tatcacacag cttcctaaaa ttttgggat  
161341 tttgggtgga attatgcttt gtataggatc tttaggttta tttgttttaa aatgtatagc  
161401 ggataaaaa atcattgatg agcaaagtgt gagtatggat tatactttta ttttatgct  
161461 tttcttgggt agttttacag gaattttact tatgttttta aagcacagct tttcttatc  
161521 ttatgcgctt tggtttcatt taagtgtgtt tttggctttt tttattatga tgccttattc  
161581 taaattcatt catatgtttt atcgttttat tgctctttta aaatacaata gcgaagaaga  
161641 aatttgatat aaaaatgcct atttttaggc atttttatag aaaagttcat tttaaatgat  
161701 actgattttt gaaaagtatt tttcaatttg tattggttga tttttaagtt taattttgta  
161761 aatcaaat tatggaaaa atcaaaaatt ataagcttat tattctttta cttgcttttg  
161821 atttattggc tctactttat ggaatttcaa cccttagtat aagcacagat gaggctaaga  
161881 tttattttga agataaaggc aattttcttt ttttgaatca tagtttgctt tattatctta  
161941 cacattttgg aacttttgtt tttggacaaa acgactttgg cttgagaatt cctattttat  
162001 tttttcattt ttttaagtgt attctgcttt atattttggc tttaaaatat acaaaaactc  
162061 attttgatag tcttttagct cttctacttt ttgtcttgtt gccagggtact gttgcaagtg  
162121 ctttgttgggt aatgaagct tctatagtga ttttttaac actagctata atttgtcgt  
162181 atgaatatga aaaaaatgg attttttatc cgcttttgat ttttagcttta tttatagata  
162241 agtcttttaa tattttattt ttaacctttt tcttttttgg aatttataaa agaaattctt  
162301 ttttattgac tttggccctt gtactttttg gtttgagtat aagtttttat ggttttgata  
162361 cgggtgggCG tccaagagga tatttcttgg atactttagg aattttcgtt gcttgttttt  
162421 caccgcttgt ttttattttac tttttttatg tggtttatcg ttttaactttt aaagagcaaa  
162481 aaagtttact atggttttta atgagcgtaa cttttatttt ttgctctttg ctttctttaa

162541 ggcaaaagct ttacttggag gattttttac ctttttgcgt gatctgtacg ccattactta  
162601 tcaaaacctt gatggcaagt tatagggtgc gtttaccaca atttaggtta agatataaaa  
162661 tttttataga atgttctatc atttttttac tattttgtta ttttgttacc ataggaaatc  
162721 aaattttgta ttattttgtt tctgatccaa aatacaatth tgccaacaat tatcaccttg  
162781 ctaaagaatt aagtaaagag cttaaaaaac aagaaattht tgaattaaga gtcggcacat  
162841 ctttgcagcc aagattaaga ttctatggta ttaaagatag taatacttht tatctaaaaa  
162901 gcattaaaaa taaagaacaa tttgataaaa ataaaaaaa tattataata aagctaggaa  
162961 aatthgaaaa aatthtcaa attcaaagat actagcgatg cttttacgct ttttgagcta  
163021 gttttggttg ttttaattht agctcttgtg atthccatag cacaaatcaa tctaaagcaa  
163081 gatagattga tgcaaggcgc aaaacaaatt cttaatgaca tacgctatgt aagatcttht  
163141 gcgatgattc aagagagctt tagggatttg gaattagcag tggcaaaaag agagtggcat  
163201 aaaagcagat ggcaattata ttttatcaat tcagcagcaa caaattatga gcaaacctat  
163261 acaatathth tagataaaaa tggcgatgga aatgctaatt tagggaaaac tgaatcaat  
163321 atcgaccgtg aaatthctgt agatatcata aaccctaaaa aatthaatgaa ttcaggacaa  
163381 agtggagtca ttgataagag tgataacaag actacgcaa gattthaatat ttttaaaaaa  
163441 tttggcataa aaaaagtaga atthtagaggt tcgtgcaggg gttctacaaa gataatthth  
163501 gacgaaaaag gaagattata ttctcttht cgaacttctc aaggtattht tgataaaaat  
163561 ttagctaaaa ccaatcaaga ctgtatcata cgcttaagct caatacaagc aatcaaat  
163621 tgcattatag tcaatccgct tagtggthth gcttacatac ctaaththca agatththaac  
163681 aagcaaatga taatgataaa tgggtacaatt tctcaatgct ctaagattht gaactththt  
163741 atththtata aathththct ataaththgaa tgcgaatatt aaataaaaag gggaaaacaa  
163801 tgaatcgatt ggaaththca gcaagattgt atththagtht tgctththgatt atththtatta  
163861 tgctgththt agctaththth tcgatagcta aagtgaththt tthtagataaa actctcacia  
163921 cagcaacagg ggaaaacgct ttgaththctc gtcaagcaat taathththagg ggaagththc  
163981 atgatagatc gathththaat cgagatgtht tththagcaca agatcaagaa gactththagaa  
164041 aaactththagc gcaaatacia aaaththggaaa aagaththtga agaagccgaa cththththaa  
164101 acgataththt agctaagggt ggaggcgatt caaatgtgcg ctctatgatg gaagaththt  
164161 caaaaactaa gaaaaatacc gtgcaaattht atcaaaagat thththgacaca gtggththaaaga  
164221 aaaatgatat tcaatcgaca actaagatgg tthththagact tgctagaccg gaathththt  
164281 tatggctagc acaaaactaat aaaththgatht atththcaaga atththgataat caagaaththt  
164341 ctcaaatagc gctthththgaa agththaatcct ththcaaththt catgatgagtht atcaththataa  
164401 ththgctththaat thththctata atthththgctt atthththaatgtht aagaththtatht aaaaaatccg  
164461 taggtggcga accaagagat gthththaatgaa ththththcaccga ggthththgctaat ggaaactththt  
164521 cacagcaaat tcatcacgaa tataaacaaa gtatactththt ththctaththct agaathththgcaag  
164581 atcaaththgcg aaththththgtht caaaaaatgtht ththctaththct taathththgctaa aaccacaaag  
164641 ctgatctagtht gthththgthtctgtht ataagcaaaa ctgaaaaggc agthththththt caaggtgaaa  
164701 ctcttagaga atctgctctt aathththctgag aathththcagtht aaaaacacia aaththththcca  
164761 aathththggcct agaaacagaa gaaaaththcaa aaththththctac ththcaathththgtht cagaacaa  
164821 aaaagcatgc cgaggataca gctththctcaa thththththgtht agcaagcaat thththctagag  
164881 thththctagca aathththgcttht cththththgtht atgththththgtht thththththgtht agththththgtht  
164941 thththththgtht gaththththcagat caaaccaatht thththththgtht aaththththgtht atagaaagctg  
165001 ctgagcaggg agatgththgtht agaggtththt ctgthththgtht thththththgtht cgcaathththgtht  
165061 ctgaaaaaac aggtggggca acagatcaaa thththctatgtht thththththgtht atththththgtht  
165121 aaacaaththgtht aacagththgtht gthththththgtht agthththththct atththththct caaggtaaaa  
165181 gctthththgtht agaggtgththgtht gatagcgtgtht atththththct thththththgtht aaththththgtht  
165241 tthththththgtht acaagaggtgtht aaththththgtht thththththgtht agthththththgtht atgththththgtht  
165301 thththththgtht aaththththgtht gthththththgtht thththththct aathththththgtht gctgththctagtht  
165361 aathththththgtht thththththgtht gthththththgtht atththththct thththththct gctgththththgtht  
165421 ctathththththgtht actthththct cththththct aathththththgtht aathththththgtht aaththththctagtht  
165481 cthththththgtht thththththct agctthththgtht gthththththct cththththct thththththgtht  
165541 gactththththgtht thththththgtht ataaacthththgtht gthththththgtht thththththgtht

//

LOCUS DMACINML\_6 142271 bp DNA linear 16-DEC-2020  
DEFINITION *Campylobacter* species strain strain.

ACCESSION  
 VERSION  
 KEYWORDS .  
 SOURCE Campylobacter species  
 ORGANISM Campylobacter species  
 Unclassified.  
 COMMENT Annotated using prokka 1.13 from  
<https://github.com/tseemann/prokka>.  
 FEATURES Location/Qualifiers  
   source 1..142271  
           /organism="Campylobacter species"  
           /mol\_type="genomic DNA"  
           /strain="strain"  
   gene 12..185  
           /locus\_tag="DMACINML\_01080"  
   CDS 12..185  
           /locus\_tag="DMACINML\_01080"  
           /inference="ab initio prediction:Prodigal:2.6"  
           /codon\_start=1  
           /transl\_table=11  
           /product="hypothetical protein"  
           /protein\_id="Prokka:DMACINML\_01080"  
           /translation="MNLGLYLKLLNDFKTLNKFELIKILEALTQNNIKTLYLKNKDKA  
           YTLTSMMLNLRVR"  
   gene 294..974  
           /gene="atpB"  
           /locus\_tag="DMACINML\_01081"  
   CDS 294..974  
           /gene="atpB"  
           /locus\_tag="DMACINML\_01081"  
           /EC\_number="3.6.3.14"  
           /inference="ab initio prediction:Prodigal:2.6"  
           /inference="similar to AA sequence:RefSeq:CAL35319.1"  
           /codon\_start=1  
           /transl\_table=11  
           /product="ATP synthase F0 sector A subunit"  
           /protein\_id="Prokka:DMACINML\_01081"  
           /translation="MKDLFLFSSLLDSSHTFSYFFHLGLVALIAVICASMATRSMQLV  
           PRGMQNLGEAFLEGVLSMGRDTMGDEKGARKYLPLVATLGIIVFFSNIIGIIPGFHAP  
           TASLNLTLSLAIIVFIYYHFEGIRTQGFVKYFAHFMGPIKFLAPLMFPIEVVSHLSRV  
           VLSFRLFGNIKGDDLFLMVILALVPYIAPLPAYVLLTFMAFLQAFIFMILTYVYLAG  
           ATIVEEGH"  
   gene 971..1171  
           /locus\_tag="DMACINML\_01082"  
   CDS 971..1171  
           /locus\_tag="DMACINML\_01082"  
           /inference="ab initio prediction:Prodigal:2.6"  
           /inference="similar to AA sequence:RefSeq:CAL35318.1"  
           /codon\_start=1  
           /transl\_table=11  
           /product="putative integral membrane protein"  
           /protein\_id="Prokka:DMACINML\_01082"  
           /translation="MIYILEFFKGLASLALMLFGALFFFFKFHSFLYFFLGLLPGLLLS  
           LVFICLIENYELKCLKINQDKSK"

gene complement(1181..2029)  
/gene="metF"

CDS complement(1181..2029)  
/gene="metF"  
/locus\_tag="DMACINML\_01083"  
/EC\_number="1.5.1.20"  
/inference="ab initio prediction:Prodigal:2.6"  
/inference="similar to AA sequence:RefSeq:CAL35317.1"  
/codon\_start=1  
/transl\_table=11  
/product="5,10-methylenetetrahydrofolate reductase"  
/protein\_id="Prokka:DMACINML\_01083"  
/translation="MCSFSFEIFPPRRDENIKNLNAILDDLQQLSPNFISVTFGAGGS  
INSKNTLETASLIQEEYKIPSIVHLPCIHSSKEKITSILQECKERQLDKILALRGDVC  
NDLEKSKDFSYASDLISFIRKQGEFEIYAACYPEKHNESRNFIEDIHHLKKNVDAGTD  
KLITQLFYNNEDFYTFKQNCALAGINIPIYAGIMPITNKRQVLKISQLCGAKIPPKFA  
KILEKYENNTLALDAGIAYAIDQIVDLITSGVDGIHLYTMNKSAAIKIYEAVKYL  
KEELHA"

gene complement(2039..4303)  
/gene="metE"

CDS complement(2039..4303)  
/gene="metE"  
/locus\_tag="DMACINML\_01084"  
/EC\_number="2.1.1.14"  
/inference="ab initio prediction:Prodigal:2.6"  
/inference="similar to AA sequence:RefSeq:CAL35316.1"  
/codon\_start=1  
/transl\_table=11  
/product="5-methyltetrahydropteroyltriglutamate--  
homocysteine methyltransferase"  
/protein\_id="Prokka:DMACINML\_01084"  
/translation="MKNSIISYPRIGANRELKFAIEKYFKAQSSKEELLETAKNLRAR  
HWKDIQNAGIDFIPSNDFSLYDNVLDTAFLFNITPKRYKDLNLDPLDEYFAQSRGYQG  
KNGDTIALAMKKWFNTNYHYLVPECDDASIIALSGDKIFKEYLEAKELGIETKPVLVG  
IFTLFKLIAFKDENTKQLAKDKLLQAYIELLKKLNSLGVAWLELDEPYLVYDLNQEDI  
ALFEFYKELLKHKGEVKVLLQSYFGDLRDIYTKLLESDFDALGLDFVEGKESLNLIQ  
KYGFANDKILFAGIVNGKNIYANDYAKSLKLIKELQKYTQNIIVINTSCSLLHVPYSTE  
FETKLDSSYLKLFSSAKEKLELQDLKAIINSNEENPLFKANQELFKNIPNRLDEKVK  
ARLQTLKKEDFVRKPEFKERIQIQKEFLELPLPTTTIGSFPQSADVRSNRLAFKQEK  
ISAQNYTEFNQQKIKECIQIQEEIGLDVLVHGEFERNDMVEYFGENLKGFLFTQNGWV  
QSYGTRCVKPPVIWGDVSRTPITLAWSKFAQSLSKKIVKGMLTGPVTILNWSFPRED  
ISLKESTEQIALALRDEVLLENAGIKIIQIDEAALREKLPLRKS DWHSEYLDWAIPA  
FNLVHSGVKTQTQIHTHMCYSEFSDILKEIDAMDADVISFEASRSNLNLLDTLKAVNF  
QTEVGPVYDIHSPRVPVVEEISTTIEKILSKLPKEQIWINPDCGLKTRGYEEVVAAL  
KNLVIATQKIREKL"

gene complement(4326..5096)  
/locus\_tag="DMACINML\_01085"

CDS complement(4326..5096)  
/locus\_tag="DMACINML\_01085"  
/inference="ab initio prediction:Prodigal:2.6"  
/inference="similar to AA sequence:RefSeq:CAL35315.1"  
/codon\_start=1

```

/transl_table=11
/product="putative NLPA family lipoprotein"
/protein_id="Prokka:DMACINML_01085"
/translation="MTIFAKAFCIATLFTSFAWANEELKVGSSVVPHADILKFIKPTL
QKQGYDLKIYEFNDGVIPNIMVENGELDANYFQHEPYLKEFNQRQGTHLVKVASIHIE
PMAVYSKKHKEFQPKTGASISIPNPTNESRALRIVASAGLIEIKDSELVTPLDIVKN
PKNLKFVELKDAQLTRSLDDVDYSLINSNFAILSGLNPIKDGLYTENKYSEYGNIIAV
KAGNEDLDKIKALVKALQSDEVKNFIEEKYQGALIPTF"
sig_peptide complement(5034..5096)
/locus_tag="DMACINML_01085"
/inference="ab initio prediction:SignalP:4.1"
/note="predicted cleavage at residue 21"
gene complement(5109..6101)
/locus_tag="DMACINML_01086"
CDS complement(5109..6101)
/locus_tag="DMACINML_01086"
/EC_number="1.-.-.-"
/inference="ab initio prediction:Prodigal:2.6"
/inference="similar to AA sequence:RefSeq:CAL35314.1"
/codon_start=1
/transl_table=11
/product="putative iron/ascorbate-dependent
oxidoreductase"
/protein_id="Prokka:DMACINML_01086"
/translation="MNLPVLDLKIYEKDKSTFLKNLREITSNVGFFYLINHGIDKNLN
EKLFLKSKDFNLPSSKELISMVHSPQFRGYTSEGFYEYTAGKDYREQIDIGTERKA
LKWDLNSPLWQRLEGNLWPEIPELKEIFLAWHEQTRNACLKILQAFEAALDLPSSA
FGKLYGENSYEHCKIIHYPKSSKDATQGVGPHKDGGLITFVFQEEQNGLEAFIDDQWI
KVPPLGSSVVNIGEFLELATNGYLKATIHRVNLSPKERFSIAYFLGVQLDKDIPIFP
LNPELARESKGVDTPKNPLLNRVASNYFKRMIRSHPDVARIYHSDLIEKFSFA"
gene complement(6418..6912)
/gene="luxS"
/locus_tag="DMACINML_01087"
CDS complement(6418..6912)
/gene="luxS"
/locus_tag="DMACINML_01087"
/EC_number="4.4.1.21"
/inference="ab initio prediction:Prodigal:2.6"
/inference="similar to AA sequence:RefSeq:CAL35313.1"
/codon_start=1
/transl_table=11
/product="S-ribosylhomocysteine lyase (autoinducer-2
production protein LuxS)"
/protein_id="Prokka:DMACINML_01087"
/translation="MPLLDLDFKVDHTKMPAPAVRLAKTMKTPKGDDISVFDLRFICIPN
KDIMSEKGTHTLEHLFAGFMRDHLNSDSVEIIDISPMGCRTGFYMSLIGTPDEKSVAK
AWEAAMKDVLNVSDQNKIPELNIYQCGTCAMHSLDEAKEIAQKVLNSSIIVMNEELK
LENI"
gene 7025..8443
/gene="gatB"
/locus_tag="DMACINML_01088"
CDS 7025..8443
/gene="gatB"
/locus_tag="DMACINML_01088"

```

```

/inference="ab initio prediction:Prodigal:2.6"
/inference="similar to AA sequence:RefSeq:CAL35312.1"
/codon_start=1
/transl_table=11
/product="Glu-tRNAGln amidotransferase subunit B"
/protein_id="Prokka:DMACINML_01088"
/translation="MFEVIGLEVHTQLNTKTKIFCSCATSFGEPANTNVCPTCLALP
GALPVLNEEAVKKAIAFGKAVNATINKKSVFNKKNYFYPDLPKAYQISQFDIPIVEKG
ELFININGENKRIGITRAHLEEDAGKNIHENNYSKVDLNRAGTPLLEIVSEPELRSSD
EAVAYLKKLHSIIRFLDISDANMQEGSFRCDANVSIRPKGDTKLYTRVEIKNLNSFRF
IQKAIIEYVKRQSEAWEDGVYDKEVVQETRLFDTINLVTRSMRGKEEAAEYRYFPDPP
LLPVLLKDEFLDIQIPELPDEKKMRYINELGIKESDAEVLIGSLELSRFFESLIALNL
NPKLCVNWLNTELMGLLKGELTIENSPVDAIKLALIKRIEEGVISAKAAKDILAHVF
ENPDMIDETIEKLGKQVSDSAIEAVIEQILNANADKVAEYKSGKDKLFGFFVQGQT
MKEGKGAFNPSKVNEILKAKLG"
gene 8443..9357
      /gene="gpsA"
      /locus_tag="DMACINML_01089"
CDS 8443..9357
      /gene="gpsA"
      /locus_tag="DMACINML_01089"
      /EC_number="1.1.1.94"
      /inference="ab initio prediction:Prodigal:2.6"
      /inference="similar to AA sequence:RefSeq:CAL35311.1"
      /codon_start=1
      /transl_table=11
      /product="glycerol-3-phosphate dehydrogenase [NAD(P)+]"
      /protein_id="Prokka:DMACINML_01089"
      /translation="MSKIAIIGAGKWGSALYSALSINNTCFMTRSRTQRDLPHYVFSLEQ
ALDCEYLVFALSSQGIHSLWKQNFVNKGQKILIASKIDTSTCKFLDEIFSEFVDRDK
LCVLSGSPFAAEVMQNLPCALVSGIKEKLCKEFASFFPDFIKVYTDVDRGAEICGA
YKNVLAIASGISDGLGNNARASLISRGLIEMHRFGKFFGAKEETFGLGGAGDLFL
TATSVLSRNYRVGLALAKEKKLDDILQELGEVAEGVKTAYAIEKISKDKAIYTPIVNE
IVQILQGKNVKQAVQNLLKTKDNQEFQC"
gene 9351..10532
      /gene="pyrC2"
      /locus_tag="DMACINML_01090"
CDS 9351..10532
      /gene="pyrC2"
      /locus_tag="DMACINML_01090"
      /EC_number="3.5.2.3"
      /inference="ab initio prediction:Prodigal:2.6"
      /inference="similar to AA sequence:RefSeq:CAL35310.1"
      /codon_start=1
      /transl_table=11
      /product="putative dihydroorotase"
      /protein_id="Prokka:DMACINML_01090"
      /translation="MLIKNAKIYGENLQDLLIKDGKIVKTGANLDDNDEVLDAGGMTL
LPSFVDLCVNLKNDKFSLSNLELLEKECLRGGVGAIILRDCMDFDEESFSLFLQNLKF
RKIQIFPSVCTLDKQGKLNKLNATLLNKGAHALELKSSCNANILRVSMQYALMKEKSIF
VKCYDENFDDNGVMNDCEMSFELGLAGMSAVAESSEVAKIKEIAKFYGVKVIKFDLLSL
KRSEIELLEENLKLISIHHLIKDDNACTGFNTAAKLNPPLRSKEDKESLKQALKQGGKI
DFLSSLHSAKSISLKDLAFDEAAFGIHSICEFMSLCYTFLIKEGLLTWKNLCKVTSQN
PSEFLGLNSGIIEVGKEANLVLFDSEEEISAPKSSLYANDKLFGKVKLHLIKGENIIS

```



N"  
 gene complement(10535..12061)  
 /locus\_tag="DMACINML\_01091"  
 CDS complement(10535..12061)  
 /locus\_tag="DMACINML\_01091"  
 /inference="ab initio prediction:Prodigal:2.6"  
 /inference="similar to AA sequence:RefSeq:CAL35309.1"  
 /codon\_start=1  
 /transl\_table=11  
 /product="putative phosphate permease"  
 /protein\_id="Prokka:DMACINML\_01091"  
 /translation="MQKDNLIAFIIIFTISVIAFIIWGFYISQHQILFILASIFGIF  
 MAFNIGGNDVANSFGTSVGAKTVTIKQALIIAAVFELSGAIFAGA EVTKTIRSGVIF  
 PEQFDPMLFVAIMLAALLSSGAWIFIATKKGLPVSTTHSIIIGGIVGASIMMGLLKFDG  
 SQTLSMVKWSEIVRIAISWVISPLFGGLVAYLIYSYIDKKILKPSEKLSEELKNLKKD  
 RKKFKENYFLNLKTKSMEEQIKELSAIALEDEGQENSFYKNQIKEFKEKEKSIDIYSV  
 LKTHMPIIACVGAIIITAMFLFKGLNNVSTLDILQNFWIIIGIIGTISYIVTFAIVKIV  
 KKTENLKTDRFLFAWFQIFTASSFAFSHGANDIANAIGPFAAILDVLKNGTINANSPV  
 PFAALAMFGVALVGLWFLGKEVITTVGSKLASIRPTTGFSaelgasivillatQFGI  
 PVSSTHILIGAVLGIGVYNKNANWIMMKPIGLAWIITLPAAGIMAALVFLGFKLSLGL  
 "

gene 12201..13004  
 /locus\_tag="DMACINML\_01092"  
 CDS 12201..13004  
 /locus\_tag="DMACINML\_01092"  
 /inference="ab initio prediction:Prodigal:2.6"  
 /inference="similar to AA sequence:RefSeq:CAL35308.1"  
 /codon\_start=1  
 /transl\_table=11  
 /product="putative periplasmic protein"  
 /protein\_id="Prokka:DMACINML\_01092"  
 /translation="MKSILYILMLFFSLLNADEL DNALKNNQNQWQKFNYQAACKAPT  
 IKEENIDFKSALNGILSNTLENKNGIDKTDGNLDFQENNVQIKNLNSLYERENNSLLF  
 QKEFYATQDSYNYSGGLINRYEKDDFLGINGFIDGQKEQKESKSFGAELGYHQFIKA  
 YSNYYVPNEADENLQFGISFAIPSYSAFIFDISKDSEKINYQVSYSPYVLSLKILRR  
 DFSANEAIDDTVLQVGF SFNFDESFMKQLRKKDNALQEVNRYDFLQRVR"

sig\_peptide 12201..12254  
 /locus\_tag="DMACINML\_01092"  
 /inference="ab initio prediction:SignalP:4.1"  
 /note="predicted cleavage at residue 18"

gene complement(13001..14377)  
 /gene="dctA"  
 /locus\_tag="DMACINML\_01093"  
 CDS complement(13001..14377)  
 /gene="dctA"  
 /locus\_tag="DMACINML\_01093"  
 /inference="ab initio prediction:Prodigal:2.6"  
 /inference="similar to AA sequence:RefSeq:CAL35307.1"  
 /codon\_start=1  
 /transl\_table=11  
 /product="putative C4-dicarboxylate transport protein"  
 /protein\_id="Prokka:DMACINML\_01093"  
 /translation="METLSQTFAERKPPLYKRMFKSLGFWVIVGIIAGIILGYVNKEI  
 AIASKPGVDYFISALKVLIGPIIFVTLVLGIISLES LKKVGSIGAKAVIYFEVSTLA

LAIGIFMANIMQPGRGMNLDPKQLDTASVQKYISQTTEVSASSEIMHILQDAMPRDII  
 TPFTEGKTMQVLVIAIITALIISLMRIEDRQAIQRVLEVIQNFVKILQVIMYFSPVA  
 AFSAMAVLIAQYGLGSLINLAYLLLMLVLSCLIFIFGILGLICYFAKVNIFKFMRFIS  
 REVLIVFATSSSESALAPLMRKLEKAGLSKATVGLVLPYGFNLDTNIIYLAWSLIF  
 LAQAFNVNLSLAHEISILIVLMIASKGAVGVTGSGFIVLGSTLAALGNMIESEANATL  
 AQVLPVAAIGVLLGVDFMSEMRVGNLCGNSVAALIVAIWDKQIDWEKFRYALDNP  
 KFHNAGMH"

gene 14636..15130  
 /locus\_tag="DMACINML\_01094"

CDS 14636..15130  
 /locus\_tag="DMACINML\_01094"  
 /inference="ab initio prediction:Prodigal:2.6"  
 /inference="similar to AA sequence:RefSeq:CAL35306.1"  
 /codon\_start=1  
 /transl\_table=11  
 /product="putative PAS domain containing  
 signal-transduction sensor protein"  
 /protein\_id="Prokka:DMACINML\_01094"  
 /translation="MEEIFLAKDALITSKTDLKGNIYANNDFLKYAGYEVDELLKS  
 HNIVRHEDMPRTVFKCLWDYIQSGKEIFAFVKNKAKDGRYYWVFANITASFDKQGNII  
 NYYSVRRAPNRKALPIIEEIKILLEKEKQGGIKAGLQTLDDIVNSHKTHYNHLIFNL  
 QKNN"

gene 15241..16617  
 /gene="mcp1"

CDS 15241..16617  
 /gene="mcp1"  
 /locus\_tag="DMACINML\_01095"  
 /inference="ab initio prediction:Prodigal:2.6"  
 /inference="similar to AA sequence:RefSeq:AJA55356.1"  
 /codon\_start=1  
 /transl\_table=11  
 /product="Methyl-accepting chemotaxis protein 1"  
 /protein\_id="Prokka:DMACINML\_01095"  
 /translation="MKNTFILAIIFMGFLGVLGTVFVHAYIGAVIFILIIALLAYLLLY  
 YKDEQIMIDKLHKLCKELKEGNFDRIVYIKTKSKKLAIEADLNNTIDGLEAYLREI  
 NTSISCSQKGEFYRKALPEGLKGFARNIDFINKALANIEVTAKSTFKNALSRTLMDL  
 SLGNQNKDMSQISASLNQDISAMKHVYDSVDSITHVATENGSEVDSLQNAMASLMEVV  
 NSSKETVQTFVANSQNITSVVEVIRDIADQTNLLALNAAIEAARAGEHGRGFVVADE  
 VRKLAERTQRSTSEISIAIQTMQQDFVNIQSGSEQVFNIVSESEERINKFSEAFRGLE  
 ENSSTLGKNFGAFKRLILSVVKIDHILYKSNIYLSLNGAQKFNLASTDPISNLCLE  
 RAKNVINELVSESDLILAKEFIQDNAQKAIKEANVEYIDQKVYDNIIVSDIKALEQKSA  
 DILDKLLK"

gene 16628..17122  
 /locus\_tag="DMACINML\_01096"

CDS 16628..17122  
 /locus\_tag="DMACINML\_01096"  
 /inference="ab initio prediction:Prodigal:2.6"  
 /inference="similar to AA sequence:RefSeq:APA81430.1"  
 /codon\_start=1  
 /transl\_table=11  
 /product="Signal transduction protein CetB, mediates an  
 energy taxis response"  
 /protein\_id="Prokka:DMACINML\_01096"

```

/translacion="MAKEIFLQEDSLITSKTDLKGKIVYANDDFLKYAGYTMAEVLYK
PHSVVRHEDMPRTVFKFLWDYIKEGKEIFAYVKNKTKDNGYYWVFANVTPSIDANNNI
IGYYSVRRMPNKKAITDIEKLYSDLLRAEKESINKGVELLNDFCKNAGKSYNELIFSL
QESK"
gene 17202..19061
      /gene="gidA"
      /locus_tag="DMACINML_01097"
CDS 17202..19061
      /gene="gidA"
      /locus_tag="DMACINML_01097"
      /inference="ab initio prediction:Prodigal:2.6"
      /inference="similar to AA sequence:RefSeq:CAL35303.1"
      /codon_start=1
      /transl_table=11
      /product="tRNA uridine 5-carboxymethylaminomethyl
modification enzyme"
      /protein_id="Prokka:DMACINML_01097"
      /translation="MFDIIVIGGGHAGIEASAASARMGKKTLLLTTLIEQIGAASCNP
AIGGLAKGHLVKEIDAMGGLMGEITDIAGIQFRILNESKGVAVRGSRAQIDMDKYRIV
ARNKLLKLNLEISQEQVCELIYENDSVGVKTNLQNSYKAKKVILTTGTFLNGLIHI
GENKLTAGRVGELASVKLGQNLSTNLKMGRKLTGTCPRVDAKSIDFDVLEIQYGDKN
PKAFSFRTKNFNPKQLPCYIARTNLNTHIIEKNNFYRAPLFTGQIEGIGPRYCPSIED
KINRFSEKESHHLFIEPQTIDATEYYINGFSTSLPYEVQIQMLRSVKGFEAKITRFG
YAIETYDIEPTELYHTLETKKIKNLKCYAGQINGTTGYEAAAQGFAGVNAVLALDNK
EPFILRRDEAYIGVLIDDLVIKGTKEPYRMFTSRAEFRLLLREENAIVRLGKYGKELG
LLEDESYQFIENIRLNTQKGLELLLEKEFTPTNTENNTFLASIGEEKITSIVNLQKIVA
RSSFDIEKLLKLNVIENMDEYSLREILNEAKYYHYIAMQKSQVEKMKNLIDMKIPSD
FDFTSVSGLSNEVVEKLGKHKPLTLFAASEISGITPAALDILQIYIKMQKKA"
gene 19061..20329
      /gene="arsB"
      /locus_tag="DMACINML_01098"
CDS 19061..20329
      /gene="arsB"
      /locus_tag="DMACINML_01098"
      /inference="ab initio prediction:Prodigal:2.6"
      /inference="similar to AA sequence:RefSeq:CAL35302.1"
      /codon_start=1
      /transl_table=11
      /product="arsenical pump membrane protein"
      /protein_id="Prokka:DMACINML_01098"
      /translation="MLASVIFLITLILLFWRPWNPLWLIAIFGALFAFIFKLVNLED
AFFVFDLVWSSSLTLVGLIILSFSLEVLGFFNFVAVRILRLSKVKNFHTIHTKKLMLF
MLVVFVCLFSGNDGAILIITPIVLALFSTLKNYKESAILSFAFLSVSFLCDASSNA
LIISNLNIIITANYFDLDFLEFAKTMFLPNLFVLFSTIIMVFLIFAKILPKELEINIL
TKDCISVKLVFVFCVYLIFVSSFFIGEFYSLNVSFFAISGALIFWFFVCFLLKKEAL
KIIKNVPWGIFAFSFGLYMVVFALHKVGISNILISIIDVLVQNKITAIIFGTGFISAF
SSIFNNLPMTLIGDLALKNFPQSMVYAHLLGVNIGPKLTPIGSLATLLWLGLLTKKG
EISFWKYCKFGFLITFPVLICSLFALVLQY"
gene 20417..20920
      /gene="petA"
      /locus_tag="DMACINML_01099"
CDS 20417..20920
      /gene="petA"
      /locus_tag="DMACINML_01099"

```

```

/EC_number="1.10.2.2"
/inference="ab initio prediction:Prodigal:2.6"
/inference="similar to AA sequence:RefSeq:CAL35301.1"
/codon_start=1
/transl_table=11
/product="putative ubiquinol-cytochrome C reductase
iron-sulfur subunit"
/protein_id="Prokka:DMACINML_01099"
/translation="MATSESRRSFMGFAGFTVAAVGGVFLVAVKKTWDPLPSVKAAG
FTTVDLSGMQDGELRTIEWRKKPIFILKKDPNMEKDKTRDVVVDNAAYTVVIGLCTHL
GCIPAYHASEQLFKCACHGGEFDTSGKNTFGPPRPLDIPPFKIDGTLVLGEEGPEY
KKMTEEA"
gene 20922..22169
      /gene="petB"
      /locus_tag="DMACINML_01100"
CDS  20922..22169
      /gene="petB"
      /locus_tag="DMACINML_01100"
      /EC_number="1.10.2.2"
      /inference="ab initio prediction:Prodigal:2.6"
      /inference="similar to AA sequence:RefSeq:CAL35300.1"
      /codon_start=1
      /transl_table=11
      /product="putative ubiquinol-cytochrome C reductase
cytochrome B subunit"
      /protein_id="Prokka:DMACINML_01100"
      /translation="MAHIRKANGLVDWLDQRLAVHKLLDVLVMKYWIPKQINFLWAMG
VILTTLFTVLFITGLLLVMYYKPDALAFDSVNKTIMQEVEYGLWRHMHGVAASVIF
LIIYIHMLTGIYYGSYKRGREMIWVSGMLLFVVFSAEAFSGYMLPWGQMSYWAAQVIT
NLFGGIPLIGPELVIWIRGDYAVSDPTLTRFFMLHVCLLPVIVIIAIIAFHFYSLRIPH
VNNEIAEELDFDLEAEKYMAGDTKGSKVIPFWPFGFLSKDFMYICLFMIFFFYLVCFKF
GFAMDPINFDPANALKTPAHIYPEWYFLWSYEVLRGFFFDIAGIKAFDGLAAGFIAQ
VIFLLPWLDVSDVVKPAHERPLFFIWFVLLIDLIVLTIYGLPPTGVNAWVGFIYAS
IIFLLLFIVVLPVITIMERKGAK"
gene 22169..23293
      /gene="petC"
      /locus_tag="DMACINML_01101"
CDS  22169..23293
      /gene="petC"
      /locus_tag="DMACINML_01101"
      /inference="ab initio prediction:Prodigal:2.6"
      /inference="similar to AA sequence:RefSeq:CAL35299.1"
      /codon_start=1
      /transl_table=11
      /product="putative ubiquinol-cytochrome C reductase
cytochrome C subunit"
      /protein_id="Prokka:DMACINML_01101"
      /translation="MRELKIFLVVVVFTALVYWGVEPYAHSVMPKPHVAPANFDYAAED
TAYAKGIIAEKEIALEDAKKSNDAKRIESAQKDLKAKENLAKVEELWADVAKIDFTK
GNAAKGKEFFNNCFACHGVKEDDIAANITDSSLGVIPDLSSAGVIFDEKFLAALIM
NPALALKVDHKFGDAFIMTAYNSETSGDSEELVNANIADVIAYLKEVGKFEAKENAT
IKQEAELKYSKIEDANEKSALVEKEIAFAKDKSTFIEACGRCHDVKYDNFFTPSNHND
LANYLGSVPPDLSMMIRSRGEQYLHDFINNTQKLLPGTAMPRVGLTEDAQAKVVSYLE
KVGDSKKEERESIGIYVMIFFVILSIFAIGWKRSVWSKLN"

```

gene 23421..24584  
 /gene="cfa\_2"  
 /locus\_tag="DMACINML\_01102"

CDS 23421..24584  
 /gene="cfa\_2"  
 /locus\_tag="DMACINML\_01102"  
 /EC\_number="2.1.1.79"  
 /inference="ab initio prediction:Prodigal:2.6"  
 /inference="similar to AA sequence:RefSeq:CAL35298.1"  
 /codon\_start=1  
 /transl\_table=11  
 /product="cyclopropane-fatty-acyl-phospholipid synthase"  
 /protein\_id="Prokka:DMACINML\_01102"  
 /translation="MLEKQMIKFILSKWNYGNFRIVFWDQEEFHVGNQPAKFSLIFKE  
 KIPFLKLFSDTSLVFAKHYESKLEIEGDYDEIAKVLYYFSNKRFLKNTEDILSKIAQ  
 KQESKNIKSHYDIGNDFYKLWLDLDTMSYSCAYFKTSSDTLYEAQINKIEHTLKKLDLK  
 PNEKLLDIGCGWGLSIIAAQKYGVKVVGITISEEQCKKAQERVKEFKLEDRVEIRLQ  
 NYQDLEFEDYFDKVVSVGMFEHVGENLGLYFMKAKQVLKPGGSMLLHSLAMFEGKT  
 NAWIDKYIFPGGYLPSLREVVSAMSEWDFHLLLAESLRIHYAKTLDMWSNNFNQVLPQ  
 VRKKYDEEFIRMWDLYLRSCASAFRVGSVDLFQFLITKEINNNLSLTKEYIYK"

gene 24702..25493  
 /gene="rpsB"  
 /locus\_tag="DMACINML\_01103"

CDS 24702..25493  
 /gene="rpsB"  
 /locus\_tag="DMACINML\_01103"  
 /inference="ab initio prediction:Prodigal:2.6"  
 /inference="similar to AA sequence:RefSeq:CAL35297.1"  
 /codon\_start=1  
 /transl\_table=11  
 /product="30S ribosomal protein S2"  
 /protein\_id="Prokka:DMACINML\_01103"  
 /translation="MVSMDLLECGVHFGHQTRRWNPMMKFFIFGERKGIYVIDLQKT  
 LRYFRYTYNIVRDAAAEGKTIILFVGTGKQAGGAIKEYAEKCGMPYVNRWLGGMMTNF  
 GTIRQSIRKLEVIEKMEEDGSIKLLTKKEALMLTRKKEKLLAYLGGIRYMKTPDMI  
 VIDTVKEKIAVQEANRLKIPVAPLDTNCDPDLVTYPIPGNDDAIRSVQLFCQEMAEA  
 INEGKALREQDGEALPSEEKEITEEKKEVLDEAMSEEDFNGEQE"

gene 25493..26566  
 /gene="tsf"  
 /locus\_tag="DMACINML\_01104"

CDS 25493..26566  
 /gene="tsf"  
 /locus\_tag="DMACINML\_01104"  
 /inference="ab initio prediction:Prodigal:2.6"  
 /inference="similar to AA sequence:RefSeq:CAL35296.1"  
 /codon\_start=1  
 /transl\_table=11  
 /product="elongation factor TS"  
 /protein\_id="Prokka:DMACINML\_01104"  
 /translation="MAEITAAMVKELRESTGAGMMDCKNALSETNGDFDKAVQLLREK  
 GLGKAAKKADRLAAEGLSVKVSDDFTSATVSEINSETDFVAKNDQFIALTKDTTAHI  
 QNNSLQSV EELHSSTINGVKFEEYLKSQIATIGENLVVRRFASLKAGANGVVNGYIHT  
 NGRVGVIIAACDNAEVANKSRDFLKQLCMHIAAMKPSYLSYEDLDVEFVENEYKALV  
 AELEKENEERRRLKDPNKPEHKIPKFA SRKQLSDAILKEA EENIKEELKAQ GKPEKIW"

DNIIPGKMNSFIADNSQLDSKLTLMGQFYVMDDKKTIEQVIAEKEKELGGKIKIVEFI  
 RFEVGEGLKKTEDFAAEVAAQL"  
 gene 26576..27211  
 /locus\_tag="DMACINML\_01105"  
 CDS 26576..27211  
 /locus\_tag="DMACINML\_01105"  
 /inference="ab initio prediction:Prodigal:2.6"  
 /inference="similar to AA sequence:RefSeq:CAL35295.1"  
 /codon\_start=1  
 /transl\_table=11  
 /product="putative ABC transporter ATP-binding protein"  
 /protein\_id="Prokka:DMACINML\_01105"  
 /translation="MELLRAENLGHSDYPLFENLNFSLNKKDCIAIQSSGCGKSTL  
 LHISSLLKPNKGEVFFKQQLYKISENERLKIRRYDLGIIQTHYLFKGFSALENIE  
 LASVLSNQDLDEKILKKGIIHELLKQKIGKLSGGQQQRVSIARVLCCKPKIIFADEAT  
 GNLDNFNAKVIPELLVSYAKENDAALFFVTHDSKLAQFCDKTYILNTNGIC"  
 gene 27198..27965  
 /gene="fliR"  
 CDS 27198..27965  
 /gene="fliR"  
 /locus\_tag="DMACINML\_01106"  
 /inference="ab initio prediction:Prodigal:2.6"  
 /inference="similar to AA sequence:RefSeq:CAL35294.1"  
 /codon\_start=1  
 /transl\_table=11  
 /product="flagellar biosynthetic protein"  
 /protein\_id="Prokka:DMACINML\_01106"  
 /translation="MEFVNYLGDKNVATFMLLFARMSGLIVFFPFFSHNSIPIIIKTT  
 FALFLTMYLFPLAKLEILHLDSFFIIQLLSEIVFGMIAGLMLQIIFAIIMMAGEQIAF  
 TMGFTMASVLDPSSGTNMPITSQILHLIALFFLAFDGHHMLLFLSHSLGYISLGGF  
 YPHENLMHYLNMGMLNIFIIGFTMSFPILGISLLADTIFGLLMKTMPPQFNLLVIGYPI  
 KIALGFIVLIAILLVMMQYFKDLILEVFTHMQTLFFA"  
 gene 28021..29544  
 /locus\_tag="DMACINML\_01107"  
 CDS 28021..29544  
 /locus\_tag="DMACINML\_01107"  
 /inference="ab initio prediction:Prodigal:2.6"  
 /inference="similar to AA sequence:RefSeq:ALW62262.1"  
 /codon\_start=1  
 /transl\_table=11  
 /product="highly acidic protein"  
 /protein\_id="Prokka:DMACINML\_01107"  
 /translation="MKILLNENPVVSRLLISLSAKKMSYDFEEVNAYDENLGHYDAII  
 VSDTPAPLKILKEKCDKLIFLAPRNQSVVDALILHKPFLPTDFLNLNQNENLKIED  
 DAILPIEEAENPYANISLDLDDLNLDDLDPDEKTEDIQENELSMEENLESALDDIKED  
 ARAHENTDKELNLDDLSDDEEQKNHTSEATVNHLEEKNEQESLEVLSDQDDILDDKI  
 SEEDSKNQEQDFEDQNEIQDKIEDIQELEEQTDKLDKDLLKDFEFGQEVNANDALD  
 IKEETKIEALEKEESLDKIQSQDFITDDFPIVEEQETKVDFDDIPEDAFLGQTKED  
 EAVEDFLPVVEDQENLDEHDFEEMSNLSTQDQIKEELAQLDELEYDIDSDDSIKVL  
 DFKEEPILDDKDLPINDEEIVPKLEINDFDSLKESDIQEALGEEISTLEDNKSEKLL  
 TKEDQLANEAGEEIVNELSQSIAGAITSSIKDDTLKAALKGMNMNINISISFNEDKN"  
 gene 29541..30158  
 /gene="gmk"

CDS /locus\_tag="DMACINML\_01108"  
 29541..30158  
 /gene="gmk"  
 /locus\_tag="DMACINML\_01108"  
 /EC\_number="2.7.4.8"  
 /inference="ab initio prediction:Prodigal:2.6"  
 /inference="similar to AA sequence:RefSeq:CAL35292.1"  
 /codon\_start=1  
 /transl\_table=11  
 /product="guanylate kinase"  
 /protein\_id="Prokka:DMACINML\_01108"  
 /translation="MSAFILLVSGPSGAGKSTLLKRLFDEFQEELYFSISSTTRLPRE  
 GEQHGVDYFITHDEFQQGIDKEQFLEWAKVHENFYGTSLEHTQNALNDGKIVVFDID  
 VQGFKIAKEKMAEKIISVFITTKNKDELKRLIKRNTDTILQLEKRLQNASDEMKELN  
 EYDYLIINDKLEESYEALRAILIAHKFKTKGQNLEQIQNIWNKGE"

gene 30160..30405  
 /gene="tatA"

CDS 30160..30405  
 /gene="tatA"  
 /locus\_tag="DMACINML\_01109"  
 /inference="ab initio prediction:Prodigal:2.6"  
 /inference="similar to AA sequence:RefSeq:CAL35291.1"  
 /codon\_start=1  
 /transl\_table=11  
 /product="Sec-independent protein translocase (TatA/E)"  
 /protein\_id="Prokka:DMACINML\_01109"  
 /translation="MGGWSSPSHWLIILLIVVLLFGAKKIPELAKGLGKGIKTFKDEM  
 SNEDEAAKNANAHKIEEKQNTTNTSTANIDEVKKS"

gene 30416..32008  
 /gene="argS"

CDS 30416..32008  
 /gene="argS"  
 /locus\_tag="DMACINML\_01110"  
 /EC\_number="6.1.1.19"  
 /inference="ab initio prediction:Prodigal:2.6"  
 /inference="similar to AA sequence:RefSeq:CAL35290.1"  
 /codon\_start=1  
 /transl\_table=11  
 /product="arginyl-tRNA synthetase"  
 /protein\_id="Prokka:DMACINML\_01110"  
 /translation="MKNIIFNEVKKILECDFALENPKDKNLAHFATPLAFSLAKELKK  
 SPIAIAANDLAAKFQEHSYFDKVEALNGYLNFRLSKTFNLNLANKALQNPNEFSKGEKG  
 TESFLLEYVSANPTGPLHIGHARGAVFGDTLARVAKHLGYKFDTEYYVNDAGNQIYLL  
 GLSIFLNKESILKQVEVEPEQYKGDYIIDLAKEAYEHFPQDFTEENIPALADWAK  
 DKMLILIKDNLQANIQIDTYASERSYYGAL EATLSALKEHGGVVEQEGKIWLASSLK  
 GDEKDRVIREDDGRGTYLAADIVYHKDKMSRGYDKCINIWGADHHGYISRMKAAMEFL  
 GFKADDLEIILAQMVSLLKNGEPYKMSKRAGNFILMSDVVEEIGSDALRYIFLSKKCD  
 THLEFDISDLQKEDNSNPVFIYINAHARIHQVFGKAGKKIDDVIDADLQSLNQDGVNL  
 LFEALNLKAVLIDAFEARALQKIPDYLNLAASFHKFYENKVVGSVNENDLLKLFAL  
 VALSIKTAFALMGIEAKNKMEH"

gene complement(32027..32335)  
 /locus\_tag="DMACINML\_01111"

CDS complement(32027..32335)  
 /locus\_tag="DMACINML\_01111"  
 /inference="ab initio prediction:Prodigal:2.6"  
 /inference="similar to AA sequence:RefSeq:CAL35289.1"  
 /codon\_start=1  
 /transl\_table=11  
 /product="putative efflux protein (multidrug resistance protein)"  
 /protein\_id="Prokka:DMACINML\_01111"  
 /translation="MYIAIIILSAFLDIVANLLKSDGFRHKSWGIAAIIISAILAFF  
 LLSFSLKYVPLSIAYSTWGAIGIIGTCLGGWILYREKLNKIGILGIVIVIIAVFLLNH  
 "

gene complement(32336..32677)  
 /gene="mdtJ"  
 /locus\_tag="DMACINML\_01112"

CDS complement(32336..32677)  
 /gene="mdtJ"  
 /locus\_tag="DMACINML\_01112"  
 /inference="ab initio prediction:Prodigal:2.6"  
 /inference="similar to AA sequence:RefSeq:ADT72934.1"  
 /codon\_start=1  
 /transl\_table=11  
 /product="Spermidine export protein mdtJ"  
 /protein\_id="Prokka:DMACINML\_01112"  
 /translation="MNLIKKELFIAWFFLISAIIVFEVLGTSFLKMDNPILAYGFMAIF  
 IAFSYFFMGKAIKKIQVGIAYAVWELLGIILILLVSVFILFKESLTSTQMLGIALSIIG  
 IILINIGEVKE"

gene 32784..33491  
 /locus\_tag="DMACINML\_01113"

CDS 32784..33491  
 /locus\_tag="DMACINML\_01113"  
 /inference="ab initio prediction:Prodigal:2.6"  
 /inference="similar to AA sequence:RefSeq:CAL35287.1"  
 /note="conserved hypothetical protein Cj1172c"  
 /codon\_start=1  
 /transl\_table=11  
 /product="hypothetical protein"  
 /protein\_id="Prokka:DMACINML\_01113"  
 /translation="MGRAFEYRRASKEARWDKMSKLFPKLAKAIQVAKEGGADPDMN  
 PKLRSIAIATAKANNMPKDNIDAAIKRASGKDSADIKNIHYEGKAAHGALVIVECMTDN  
 PTRTVANVKAIKNGGEVLQNGSLGFMFARKAVFHLEKFDGDLELELELELIDAGLEE  
 LEQNEELVISGDYAFGELSTAIEAKGLVLKAGLEYIANNPVSFSEEQLGDIEKLL  
 DKLEDDDDVQAVYTNIE"

gene 33501..33983  
 /gene="ppi"  
 /locus\_tag="DMACINML\_01114"

CDS 33501..33983  
 /gene="ppi"  
 /locus\_tag="DMACINML\_01114"  
 /EC\_number="5.2.1.8"  
 /inference="ab initio prediction:Prodigal:2.6"  
 /inference="similar to AA sequence:RefSeq:CAL35286.1"  
 /codon\_start=1  
 /transl\_table=11



```

/product="peptidyl-prolyl cis-trans isomerase"
/protein_id="Prokka:DMACINML_01114"
/translation="MLKTIDTSKVNEYKFALVETEKGTMKLELFGDEAPQTVCNFANL
ANEGFYKDLNFHRVIPNFVIQGGCPHNGIGGPGYEIICECDDQAHKHQRGTL SMAHA
GRDTGGSQFFICHSPQPHLDGVHTVFGQINPEDKESLEVLDSIRQGDKIIDIKICKI
"
gene      34148..34753
          /locus_tag="DMACINML_01115"
CDS      34148..34753
          /locus_tag="DMACINML_01115"
          /inference="ab initio prediction:Prodigal:2.6"
          /inference="similar to AA sequence:RefSeq:AAW35623.1"
          /codon_start=1
          /transl_table=11
          /product="DedA family protein"
          /protein_id="Prokka:DMACINML_01115"
          /translation="MQEIIHFIIETASDWGYLGIVILMTLESCFIPFPSEIVMIPAGY
LAHKGELDIIFCILSGVLGSLVGLALINYICFFWGKFFVLRWKGKVFINEAKFAKFD
FFNKHGEFSTFTCRLPGIRQYISMPAGLVKMKLVNVLFTALGSAIWSILAFGLGY
IGENEELIKAYLTQILIVIVIFIIILASLIYIKIKKPFAKKA"
gene      complement(34750..35673)
          /locus_tag="DMACINML_01116"
CDS      complement(34750..35673)
          /locus_tag="DMACINML_01116"
          /inference="ab initio prediction:Prodigal:2.6"
          /inference="similar to AA sequence:RefSeq:AGV49768.1"
          /codon_start=1
          /transl_table=11
          /product="lactate dehydrogenase"
          /protein_id="Prokka:DMACINML_01116"
          /translation="MSKIGIVGLGFVGAASAYNIVVQNICSELYLYDIKQDLALAHAR
DLEDMSAIHSSYTRIIHATNLEKLANCDIIILAFRKENLKEPRLVELQNNITELKD
IVLSLKHANFKGKYIVATNPNDTITYYTQILSSLPKNHVFGSGTNLDSSRLKKILAKD
LNLNPKDITAYMIGEHDGDSQFAALSTASVLGQNLFTCDKMGKKLDIENIEKAVVDEG
YFIYKRKRTEFGIGTSCANLAKAVLEDRKSLHPVSVVFDLAFSLPAIIGKNGVEKI
FELDFNEREKTLENSKLQIKNAIQSVSDKI"
gene      35738..36514
          /locus_tag="DMACINML_01117"
CDS      35738..36514
          /locus_tag="DMACINML_01117"
          /inference="ab initio prediction:Prodigal:2.6"
          /inference="similar to AA sequence:RefSeq:CAL35281.1"
          /codon_start=1
          /transl_table=11
          /product="putative integral membrane protein"
          /protein_id="Prokka:DMACINML_01117"
          /translation="MQKPDIQSLTNFLIDYTKTLLSAGTYTARVAKCVGRIAQVYGYE
ININFFFHHITLNIVDIEDNSIQRTYVIPNHHAHINFKLIFELSALSWAIYDHKYELE
KAKLAFNTISIQKKHSYILNLLFVSIANSQFCRLFGGDFGAGVLVFFATFLGLLRFA
LTKVKIDLRIQYILCSFVSSWFVFLGLDMGYTNTSDAALGSSILYLIPGVFFINSIID
ILKDHILMGLSRIISVAILICCIALGIYMTLSISKFGILQ"
gene      36511..37005
          /locus_tag="DMACINML_01118"
CDS      36511..37005

```

```

/locus_tag="DMACINML_01118"
/inference="ab initio prediction:Prodigal:2.6"
/inference="similar to AA sequence:RefSeq:CAL35280.1"
/codon_start=1
/transl_table=11
/product="putative integral membrane protein"
/protein_id="Prokka:DMACINML_01118"
/translation="MIEFILKDMFFAAMAGFGFAYACNPPLKTLILSALLAAIAHGLR
FTLIEYFHFETLAIATFIASFVCGCLGIALAKIIKTPAEVIAFPALIPMIPGIYAYKA
ILYLISFIRSDDLKAKSEFLVQFFDYFFTTLSVTLALAIQSVTLILFFEQSFMMTRH
AKKH"
gene 37063..37329
/locus_tag="DMACINML_01119"
CDS 37063..37329
/locus_tag="DMACINML_01119"
/inference="ab initio prediction:Prodigal:2.6"
/inference="similar to AA sequence:RefSeq:CAL35279.1"
/note="hypothetical protein Cj1164c"
/codon_start=1
/transl_table=11
/product="hypothetical protein"
/protein_id="Prokka:DMACINML_01119"
/translation="MLCPVCNVDLVMSDRSGVEIDYCPKCRGVWLDRGELDKIIERST
PNTASFNQAPRQEPYNDHSYSQNHHDHYYKKKKRESWLGELEDFD"
gene 37402..38346
/locus_tag="DMACINML_01120"
CDS 37402..38346
/locus_tag="DMACINML_01120"
/inference="ab initio prediction:Prodigal:2.6"
/inference="similar to AA sequence:RefSeq:CAL35278.1"
/codon_start=1
/transl_table=11
/product="putative cation transport protein"
/protein_id="Prokka:DMACINML_01120"
/translation="MYEFLHEPLANKNSKHNHEDHSHEHHHADARSMDKKILKISLL
MTFSMMLVQFVYSLLSNSLALLSDTLHMFSDVFALTLSFLAIIAIEKWQDHQKTFGYF
RLEILVAFINALTIILSAIFIIYEAIKELINPSSIDAKTMIIVAVLGLVNAINAFMM
FRGANLENVNMKSAFLHMMSDLLGSLVVIIGGIIVYFSGIVYIDTILAIILSLLLRW
SVTLKQSVNVLLETSPVDIEEVKQALLNSKVEEVIDLHITQITNKMLVASMHLRVN
IDDLKEFEQLSYDLSHDLHRFEIGHITIQLRSKNEI"
gene 38336..38539
/locus_tag="DMACINML_01121"
CDS 38336..38539
/locus_tag="DMACINML_01121"
/inference="ab initio prediction:Prodigal:2.6"
/inference="similar to AA sequence:RefSeq:CAL35277.1"
/codon_start=1
/transl_table=11
/product="putative heavy-metal-associated domain protein"
/protein_id="Prokka:DMACINML_01121"
/translation="MKFKVANINCQNCANLIKNSLEDIFGEIKIDLDANPRTLNLNLD
NSREEEFKKELSELGFVLEKIE"
gene 38539..40662
/locus_tag="DMACINML_01122"

```

CDS 38539..40662  
 /locus\_tag="DMACINML\_01122"  
 /EC\_number="3.6.3.4"  
 /inference="ab initio prediction:Prodigal:2.6"  
 /inference="similar to AA sequence:RefSeq:ADC28737.1"  
 /codon\_start=1  
 /transl\_table=11  
 /product="copper-translocating P-type ATPase"  
 /protein\_id="Prokka:DMACINML\_01122"  
 /translation="MQEFRVKIGKMTVCVNCNAIERACKKIQGVSDASVSYVNSSGVF  
 LLEDEARSQDVVKIQNLGFEILENEQNLEEYRKKELIALRKNLLLSIVLSALIMYFE  
 MFDTSFLSQNMQLLSFFAIFYCGRTFFSHAIKGLKNWNLDMNTLIALGCISAFAYSF  
 CIYLNLFEDKHYFSGAAMIISFVLLGKFLETNAKFKALNYQKRLNEIDIKKAKILN  
 EAGELSEIPSAFVKNGDIIIVSEGESVAVDGVVIQGKAEIDTSFLSGFEFLPSNVRVDD  
 EIKAGSILLNGLNHIKASKKAMDSTLEQIKDLVFKAGNIKTPLENSVDRISRYFVITI  
 IAFALAVFVWFSKAGVSEAFHACAVLLISPCALGLATPIALITAQGAAMKNFIL  
 KNPAALENLNKIKTAFDKTGTLTQNNLELFRHNLNAKDFQMLALIESSSSHP  
 IAKAI  
 FKASKIKAQILKGSSEIFIGKGVKYTEENEYLLGNLKFQESGVKNLEKADEF  
 LQGL  
 KEEALICVYFSKNGEYLGVLTLKNTLKEGAKELIEDFKKQKIQSIIILSGDNEK  
 SVQGV  
 ANLLGIVDFKAGLLPEEKLQIIKDHKQNSLFVGDGINDAAALNLASVSMFKEGSD  
 LA  
 KNAGDFILMKDDLRLISWCFKLAKTKNIKLNLFWAFFYNILCIPVAAGFVPPFITLS  
 PHLAALAMCFSSLCVVLNSLRKRV"

gene complement(40674..42230)  
 /gene="dnaX"

CDS complement(40674..42230)  
 /gene="dnaX"  
 /locus\_tag="DMACINML\_01123"  
 /EC\_number="2.7.7.7"  
 /inference="ab initio prediction:Prodigal:2.6"  
 /inference="similar to AA sequence:RefSeq:ADC28735.1"  
 /codon\_start=1  
 /transl\_table=11  
 /product="DNA polymerase III subunits gamma and tau"  
 /protein\_id="Prokka:DMACINML\_01123"  
 /translation="MLQALAIKYRPKTFDELIGQKTVSTSLKYALNHNRLAHAYLFSG  
 LRSGKTSSARIFSRALVCDNGPSDTPCGTCKQCLAALEGKHIDIIEMDAASN  
 RGL  
 EQALIEQTKYTPSMARFKIFIIDEVHMLTPQAANALLKTLLEPPSYVKFILAT  
 TDPLK  
 LPATVLSRTQHFRFKQIPQNEILNHLKEILNKENVKFEELKFFVARSGNGSL  
 RDTLT  
 LLDQAIIFCQNDISTSKITDMLGFLDPAKIKEFYHAILTKNKDRVDFLEELKDY  
 EAS  
 SVIDEMLFYLKESFFAKSSEFSTLIYERFFRILARAKNLICDDGFTLCVMAFM  
 MMEA  
 SHLKEIDTQINEIQNLTNTNSNSEKQEIKTPIAVEIQKSSPIKNAYEILLEKIY  
 DRD  
 YELGECFKQSTQFISYENEILTIGSNAQGSNRDKLNKGFKLIQELFRNHFGS  
 NAKIAV  
 QKAIIDESKLQSLTQELPQQNNEAQSSKKIDLHSSFNELKQGAKKFDQPQEDT  
 KEALR  
 EYFGEPKIEN"

gene complement(42233..43531)  
 /gene="rho"

CDS complement(42233..43531)  
 /gene="rho"  
 /locus\_tag="DMACINML\_01124"  
 /inference="ab initio prediction:Prodigal:2.6"  
 /inference="similar to AA sequence:RefSeq:CAL35271.1"  
 /codon\_start=1

```

/transl_table=11
/product="transcription termination factor"
/protein_id="Prokka:DMACINML_01124"
/translation="MEKEKKQHQRTHIPVEGYKIEDLKLLEDLENLVKIANECEIENPR
EFRRQELIFEILKAQTKKGGFILTGTILEISSEGYGFLRGMDSNLSDSVNDAYVNSNQ
IRKFALRVGDIVTGVQVREPKDQEKYALLKIEAINYLPLQEAKERPLFDNLTPIFPTE
KIKLEYDAMKLTGRILDFTPIGKQQRGLIVAPPRTGKTELMKELASAIKHNPEMHL
IVLLVDERPEEVTDMQRCVKGEVFSSTFDLPAYNHVRVAELVIEKAKRMVETGKDVII
LLDSITRLARAYNTATPSSGKVLSSGGVDANALHKPKRFFGAARNIENGGSLTIVATAL
IDTGSRMDDVIFEEFKGTGNSEIVLDRNISDRRIYPAINIIKSQTRKEELLQGVAEQ
KIWAIRSAISQMDDIEALKFLYSKMLKTKDNVELLSIMNE"
gene 43650..46007
/locus_tag="DMACINML_01125"
CDS 43650..46007
/locus_tag="DMACINML_01125"
/inference="ab initio prediction:Prodigal:2.6"
/inference="similar to AA sequence:RefSeq:CAL35270.1"
/codon_start=1
/transl_table=11
/product="putative cation-transporting ATPase"
/protein_id="Prokka:DMACINML_01125"
/translation="MKCEHCRLDYQKSQMIEAKGKFFCCRGCLSVWEILHESGLDEFY
ERLGNNAKPVSLFESNKNYDEFITKTKEGFSEIYLMIHGIECSACVWLNERVLTQKE
GILELDINHLCHKARIVFDEQSVSLAQILNLIIESIGYKASAYDPSKNSKKADLIKREF
YSKLIVAIACVMNIMWIAVAKYAGFFSGMDRDIKDILNFAEFILCSPVLFYTGSNFYK
SVFKALKMRSLNMDSLVISGASLAYGYSLWAMFFRVGVEVYFDSVAMIICFVFIGKYLE
MFSKKRALDITVDGLNDFLQNEVLVFNGKDFEPKDVQKVNIGDRILLKSGDKILIDGIC
KKGEASIDTSSLSGENEPCFVGVGGIVNSACIVLDGSIYEYASKLYKDSKLNQIIRLL
EFASKKARLESLSQISAYFSRTILTALLCFFFWLFYHKESVEISLVHAISVLIIA
CPCALALATPVSNLIALGQALKRAILFKDSSVVEKLSKCDIAVFDKGTGLTQTQLKIA
EVFLDEKLNLDYFVSVLSNHPIAKSVAQFLQDKNAKLLNLDKGLSNIQAKGKAY
LDNALFLGGSSKFLEDNGIKCKKEFNNSHFIFARDNEILAYFEFSSVLREGAKELISY
LKQAKIDTMILSGDNEKAVEKIAKELGISSFYASCLPQDKMQAIENLSHKKKVLVFGD
GVNDALALKYAAVAISLREGSDLAIENSDILLKNDLLSLKYAIKLSKDTYKIIKQNL
ILSLAYNAFTIPLAFLGLINPLIAALSMSFSSIMVILNALRIKNE"
gene 46000..46200
/locus_tag="DMACINML_01126"
CDS 46000..46200
/locus_tag="DMACINML_01126"
/inference="ab initio prediction:Prodigal:2.6"
/inference="similar to AA sequence:RefSeq:AGQ94370.1"
/codon_start=1
/transl_table=11
/product="cytochrome C oxidase subunit II"
/protein_id="Prokka:DMACINML_01126"
/translation="MNSVIMMMIGVSILGFFIILATLLWGIRTKQFDDDYKFTTLNDD
EDALRDAIELEKRKKEALKKRK"
gene complement(46230..46529)
/locus_tag="DMACINML_01127"
CDS complement(46230..46529)
/locus_tag="DMACINML_01127"
/inference="ab initio prediction:Prodigal:2.6"
/inference="similar to AA sequence:RefSeq:CAL35268.1"
/codon_start=1

```

```

/transl_table=11
/product="putative periplasmic cytochrome C"
/protein_id="Prokka:DMACINML_01127"
/translation="MKKLLVVSALACLGVSAFAADGATLFKKCAVCHGAKADKVYLNK
VPALKSISSAERLQYMKEYSEGKRNAYQGAIMKINLKGLTEEDFKAIEAYIETL"
sig_peptide complement(46470..46529)
/locus_tag="DMACINML_01127"
/inference="ab initio prediction:SignalP:4.1"
/note="predicted cleavage at residue 20"
gene 46647..47168
/locus_tag="DMACINML_01128"
CDS 46647..47168
/locus_tag="DMACINML_01128"
/inference="ab initio prediction:Prodigal:2.6"
/inference="similar to AA sequence:RefSeq:ALW55834.1"
/codon_start=1
/transl_table=11
/product="D,D-heptose 1,7-bisphosphate phosphatase"
/protein_id="Prokka:DMACINML_01128"
/translation="MKRKALFLDRDGIINIDKKYVYKIQDFEFCDGIFELCRYFLAQK
YLLFVATNQSGIARGYYTQEDFSKLCFMLDEFMKENIKIDRIYHCPHLEGCECRPKK
AGMLLKAKEEFDIDMNSIFIGDNISDMQAGKNAQIGTLCLVNEEEKEGDFFRQFKNL
NELLDFFKKKEDR"
gene 47165..48118
/locus_tag="DMACINML_01129"
CDS 47165..48118
/locus_tag="DMACINML_01129"
/EC_number="5.1.3.20"
/inference="ab initio prediction:Prodigal:2.6"
/inference="similar to AA sequence:RefSeq:CAL35266.1"
/codon_start=1
/transl_table=11
/product="ADP-glyceromanno-heptose 6-epimerase"
/protein_id="Prokka:DMACINML_01129"
/translation="MKIAITGGAGFIGSQLALNLQDEHEILIIDKMRSYETFENGLQ
SFGHFKNLLDFNGELFVGDINDEKVLRKIEDFKPEVIFHQAAISDTTVFDQTKVLQTN
LNTFKDFIELSIKLHAKLVYASSASVYGDASQPTVGNKEPKNPYAFSKFMMDKLAK
KYYDKAHLVGLRYFNVYKGEFYKNKTASMVVQFAHQILAGKNPRLFEGSDQIFRDFI
YIKDVISANKIALESKCGVYNVSGVARSFQDIVDILQKELHTNLTCEYIPNPYAKSY
QFHTQAKLDETWDYKPKFSLEEGIKDYLEEIKRLFKEVNA"
gene 48111..49496
/locus_tag="DMACINML_01130"
CDS 48111..49496
/locus_tag="DMACINML_01130"
/EC_number="2.7.-.-"
/inference="ab initio prediction:Prodigal:2.6"
/inference="similar to AA sequence:RefSeq:AOW97446.1"
/codon_start=1
/transl_table=11
/product="D,D-heptose 1-phosphate

```

adenosyltransferase/7-phosphate kinase"  
/protein\_id="Prokka:DMACINML\_01130"  
/translation="MLEFLSEQNPKILIIIGDFMVDNYTWCDCSRISPEAPVLVAKTLK  
EDKRLGGAANVYANLKSLGADV FALGVVGDDESGKFLKENLKGEFLVQKGRKTPFKNR  
IMAHNQVLRLEEDTSAILLEDELVELFNKRISNFKAVVLSDYAKGVLTPKVCKAFI  
QKANELNIPILIDPKGNDFSKYSGATLLTPNKKEALEALKFENLESENLEKGIKKLKE  
DFSLRYSIITLSEAGIALFDENLRIAPAKALEVYDVTGAGDSVIAVLAFLASGVEIF  
KACEIANEAAAIVVSKIGSVSVSFDEMKSFKRVGFEEKIKTKEELLKILEQSDKRIVF  
TNGCFDIVHFGHIKYLEKAKRLGDILIVGLNSDKSVKRLKGEDRPVNSEFQRACMLAA  
FYFVDFVWIFDEDTPLELISFLKPDILVKGADYKDKLVVGSNLVSRVELIDFEEGFST  
SKIIIEKIKDKK"

gene 49493..50053  
/locus\_tag="DMACINML\_01131"

CDS 49493..50053  
/locus\_tag="DMACINML\_01131"  
/inference="ab initio prediction:Prodigal:2.6"  
/inference="similar to AA sequence:RefSeq:AHY40356.1"  
/codon\_start=1  
/transl\_table=11  
/product="phosphoheptose isomerase"  
/protein\_id="Prokka:DMACINML\_01131"  
/translation="MINLVEKEWQEHQKVSQASEILKGQIAKVGELLCECLKKGGKIL  
ICGNGGSAADSQHFAAELSGRYKKERKALAGIALTTDTSALSAIGNDYGFVFSRQV  
EALGSENDILIGISTSGKSPNVLEAFKKAKELNMLCLGLSGKGGGKMNELCDHNLVVP  
SDDTARIQEMHILIIHTLCQIVDES"

gene 50053..50814  
/locus\_tag="DMACINML\_01132"

CDS 50053..50814  
/locus\_tag="DMACINML\_01132"  
/inference="ab initio prediction:Prodigal:2.6"  
/inference="similar to AA sequence:RefSeq:AAW35606.1"  
/codon\_start=1  
/transl\_table=11  
/product="lipooligosaccharide biosynthesis  
glycosyltransferase, putative"  
/protein\_id="Prokka:DMACINML\_01132"  
/translation="MKAFIINLERSLDRKEYMQRQIQKLFKPNLKNKLEFIFFKAV  
DAKNKEYLDFKQHFPPWASWALGRELSDGKACFASHYKLWQECVKIDEP IIILEDV  
EFSDEF LNNEEYIEELSKSEYEVRF CYLFDK KFYPLNNNYLLSFEKLAGTQGYVLK  
PSAAKFKIKYAKRWIYPVDDYMDMFYKHKVLNIVKKPLLLKHDCGLESMISQAGRLF I  
KPRLYKKIIREIFRLYRDVSKLSYVFYIKKKLKLK"

gene complement(50807..51751)  
/locus\_tag="DMACINML\_01133"

CDS complement(50807..51751)  
/locus\_tag="DMACINML\_01133"  
/inference="ab initio prediction:Prodigal:2.6"  
/inference="similar to AA sequence:RefSeq:AHY40355.1"  
/codon\_start=1  
/transl\_table=11  
/product="ADP-heptose--LPS heptosyltransferase II"  
/protein\_id="Prokka:DMACINML\_01133"  
/translation="MKIFIHLPTWLGDAVMASSALYGVYHFKNAEFILYGSFVSTAL  
FKEFPNAK IIIENKKSRYKQALSLRKKLGKIDLALSFRSAFSSKIIILHILKAKKRYFF  
NKYFNKKEHQVLKYLFIENSLDIKAHSDKDLKLPFRLKFNPIVLKNGKKILGLNPGA

SFGSAKRWDASYFAQVALNFSKTHEILIFGAGKAEQELCDEIFHILKEKNVVKVKNLCN  
KTTIKMLCQNIACDIFITNDSGPMHIAAAYKTKTVAFGPTKFTQTSPWQNNQNAKLK  
HLNLACMPQMKTCLPKHHQCMKDLKPEKILEAIRNFT"

gene 51810..52622  
/gene="waaV"  
/locus\_tag="DMACINML\_01134"

CDS 51810..52622  
/gene="waaV"  
/locus\_tag="DMACINML\_01134"  
/inference="ab initio prediction:Prodigal:2.6"  
/inference="similar to AA sequence:RefSeq:CAL35262.1"  
/codon\_start=1  
/transl\_table=11  
/product="putative glucosyltransferase"  
/protein\_id="Prokka:DMACINML\_01134"  
/translation="MPQLSIIIFLNSCDFIARALQSCINQTLRDIEILVDDKSEDE  
SVKIALEFAKKDERVKIFQNDENLGTAFATRNGLVLSRAEFIMFLDSDDFLALNACEV  
ALTKIKQGFLLCFDAFVHRVTKQFYRFKQDEAFNQKEFFELGKQRHFCWSVWAKL  
FRKDLILKSFERINLYERLSYGEDVLCYMNFLCEDKMGVFKECIYHYEFNEKGRYEN  
KNKEILWQNYKDKKRSNELIKLSLKSDDDEFCKRLFVLEKEEGDFIERLK"

gene complement(53384..54049)  
/locus\_tag="DMACINML\_01135"

CDS complement(53384..54049)  
/locus\_tag="DMACINML\_01135"  
/inference="ab initio prediction:Prodigal:2.6"  
/inference="similar to AA sequence:RefSeq:EAQ72057.1"  
/codon\_start=1  
/transl\_table=11  
/product="CMP-Neu5Ac synthetase"  
/protein\_id="Prokka:DMACINML\_01135"  
/translation="MTLAIIPARAGSKGIKNKNLVLHKNPLLYYTINAAKKSKYIDK  
IVLSSDGDEILKYGKTQDIDILKRPQELALDDTTSKVVVLALEFYKDYENVILLQPT  
SPLRTSEHIDKAFEIFKNTNANSLISVCEYDNKILKAFMCDEKGNLKGICNNNYPFMP  
RQKLPKTYISNGAIYILKTKDFLQNPFLQENTKYFLMDEISSFDIDNLEDLEKVEQI  
WKK"

gene complement(54046..55005)  
/gene="neuA1, cgtA"  
/locus\_tag="DMACINML\_01136"

CDS complement(54046..55005)  
/gene="neuA1, cgtA"  
/locus\_tag="DMACINML\_01136"  
/EC\_number="2.7.7.43"  
/inference="ab initio prediction:Prodigal:2.6"  
/inference="similar to AA sequence:RefSeq:CAL35260.1"  
/codon\_start=1  
/transl\_table=11  
/product="two-domain bifunctional protein  
(beta-1,4-N-acetylgalactosaminyltransferase/CMP-Neu5Ac  
synthase)"  
/protein\_id="Prokka:DMACINML\_01136"  
/translation="MILFYKIIAYLRVFKITKKNLFTNEYFLNLNQSIYNEEHKGFN  
FDPASKDPKSPNLPWAFIRVKNEALTLRASLESILPAIQRGVIGYNDCTDGSEIILQ  
FCKQYPSFIPKYPYEVQIENPWSEENKLYSYNYVASFIPEDEWLIKIDVDHYYDAK  
KLYKSFYMASKNTAVRFPRINFLILNNEIFIQDIGGGENGFINGEDQLLIQKHNSIFT"

```

ERMVSKQSQWIDPDQTTKELYSEQQIIPKNVKILQAELLQWHFPALKYRRNNYQKYLN
ILTLEEFKKIHYKHKRIKKINYALLDEKVIYEILNKFKLGNKQ"
gene      complement(55008..56120)
          /gene="neuC1"
          /locus_tag="DMACINML_01137"
CDS      complement(55008..56120)
          /gene="neuC1"
          /locus_tag="DMACINML_01137"
          /EC_number="5.1.3.-"
          /inference="ab initio prediction:Prodigal:2.6"
          /inference="similar to AA sequence:RefSeq:CAL35259.1"
          /codon_start=1
          /transl_table=11
          /product="putative UDP-N-acetylglucosamine 2-epimerase"
          /protein_id="Prokka:DMACINML_01137"
          /translation="MKKIVFVSGTRADFSKIKSLMMKVENSEFELFIFATGMHMSKK
FGSTYIEIEKCGFKNIYKYINHDKYYQTDKALASTIDGFSKFIHEVEPDLIVVHGDR
EPLAAAVGSLNNILVAHIEGGELSGTIDESLRHAISKLAHIHLVNDIACKRLIQMG
EDEKSIFIIGSPDLELLNNNISLNEAKKYININFENYAIAMFHPVTTEINSLYKQSEE
FVNALIKSEKNYIIIYPNNDLGFELILQNYEKLKNNDKFKIFPSLRFEYFISLLKNAD
FIIGNSSCILKEALYLGNGILIGTRQDGRDIDKIKVKANEKDILEAILS LHKHNN
TVNKKLDILNSSEQFYKLLKNNSLFDINKQKIFRDR"
gene      complement(56117..57154)
          /gene="neuB1"
          /locus_tag="DMACINML_01138"
CDS      complement(56117..57154)
          /gene="neuB1"
          /locus_tag="DMACINML_01138"
          /EC_number="4.1.3.-"
          /inference="ab initio prediction:Prodigal:2.6"
          /inference="similar to AA sequence:RefSeq:CAL35258.1"
          /codon_start=1
          /transl_table=11
          /product="sialic acid synthase (N-acetylneuraminic acid
synthetase)"
          /protein_id="Prokka:DMACINML_01138"
          /translation="MQIKIDKLTISQKNPPLVPEIGINHNGSLEIAKLMVDAKRAG
ASIIKHQTHIVEDEMSQEAKKVIPGNADISIYEIMQKCALSQDELVLKEYVEKQGLV
YISTPFSRAANRLEDMGVSAYKIGSGECNNYPLIKHIAQFKKPMIISTGMNSIESIK
PTVKILRDFEIPFVLLHTTNYPTPSHLVRLQAMLELYKEFHCLYGLSDHTTDLACL
GAVALGACVLERHFTDTMDRKGPDIIICSMDEQALKELIIQSEQMAIMRGDSASKKATT
EEQVTIDFAFASVVSIIKDIIKDEILSMDNIWVKRPGLGGINAKEFENILGKKAVKDIK
NDTQLTWEDFK"
gene      complement(57135..58019)
          /gene="cstIII"
          /locus_tag="DMACINML_01139"
CDS      complement(57135..58019)
          /gene="cstIII"
          /locus_tag="DMACINML_01139"
          /inference="ab initio prediction:Prodigal:2.6"
          /inference="similar to AA sequence:RefSeq:CAL35257.1"
          /codon_start=1
          /transl_table=11
          /product="alpha-2,3 sialyltransferase"

```



```

/protein_id="Prokka:DMACINML_01139"
/translation="MNINTNALVCGNGPSLQNIIDYKLLPINYDVFRCNQFYFEDKYFT
GKDIKYAFFNPFVFFFEQYYTAKQLIQKNEYTINNLICSSFGLPYIDGVNFISNFELYF
SDAFLGHKIIKKLKDFFAFIIYNEVHKKQRITSGVYMCATAVALGYKNIYVCGIDFYQ
DMNNLYAFDNNKKNLNICTGFKNEKFKFINHSMEYDLQALNFLIKTYNINIYSLNSN
NYFNLAPDVGNDVFLNSKPKYINDILLPTKYAQEIYHGRKNLKENLYYKLIKDFLH
LPSDIKHIREKYANKNR"
gene 58077..59039
/locus_tag="DMACINML_01140"
CDS 58077..59039
/locus_tag="DMACINML_01140"
/inference="ab initio prediction:Prodigal:2.6"
/inference="similar to AA sequence:RefSeq:AFU43191.1"
/codon_start=1
/transl_table=11
/product="beta-1,3 galactosyltransferase"
/protein_id="Prokka:DMACINML_01140"
/translation="MSQNSIILPTFNVEKYIARVLESCINQTFKDIEIIVVDDCGNDK
SIEIAKEYAIKDNRIKIIHNEENLKLRLARYEGVKVATSSYIMFLDSDDYLEPNACEE
CVKILNTNKNIDLICFNYYECGNSREEWTFDDACYNNEFCYFLFSKYPVFSWNIFN
KIFKDLYLKAYNAIDLKLEKNTMAEDFLVLHGLSFVKTIYTTKKYLYNYSNEN
SSTREKKDFYKIKSYVNDLSFVMKKISNLIQIQVNKNHILIFKIAICDLNIHKIDLIC
KYIVKNIFEKILLKIKRRIKMQKKNLIQQAKNIQKENVVYPNF"
gene 59020..60231
/locus_tag="DMACINML_01141"
CDS 59020..60231
/locus_tag="DMACINML_01141"
/inference="ab initio prediction:Prodigal:2.6"
/inference="similar to AA sequence:RefSeq:AVS37638.1"
/codon_start=1
/transl_table=11
/product="glycosyltransferase family 8 protein"
/protein_id="Prokka:DMACINML_01141"
/translation="MYHIIIFSADENYIKYTSVLITSIKNTNPKNHFQNRPYSFHILS
NFVSEETREKLERLKKELSKIYPCEISIHMSDDRFENFPSSGAAQNSKLPYYRLKFI
SLLDDNVDKCLYLDSMLCMCDIREIFAIDLQGKIIGVVGDPGSKRSKIKFIENNTKK
VLKFDENYFNSGFLINAKEYKANVEKKCEELAKKCIYIKAADQDLNAVIPKDKIL
KLSFAYNFNIITLLYVICKDEKKNRLNYTREEFTQSAKNPKILHYGEKPWKFLKSYVD
LQNRNIDYWWDIAKEVPIFKEELLRQKENIKDYLLYAGLGFLLYNLCKKYQLFTIKQ
LLQTEHDAKLIEFAKGLNDDKYGLYCLGEMVLYARKHKKGVINIILKSYKMIKMYEK
YAHKSRDIKNL"
gene complement(60218..61273)
/locus_tag="DMACINML_01142"
CDS complement(60218..61273)
/locus_tag="DMACINML_01142"
/inference="ab initio prediction:Prodigal:2.6"
/inference="similar to AA sequence:RefSeq:AIW10334.1"
/codon_start=1
/transl_table=11
/product="glycosyl transferase family 1"
/protein_id="Prokka:DMACINML_01142"
/translation="MKILLLIGDITIGGGAERVVINLANALFELKYDVKIFSFYKQGQ
DIAYELNENIKIDYLYHKSMTDVKKEKPLYKLYYKHYESYILKQYKIDVMIFFNCP
HFPFFKNKNTKYINFIHMSFKKYRKNRYFDALVILSNKQIEQWEKYHKNIWVIPNFL

```

SCKSLQANLNCNKNILSVGRMALEDQKGFRLRLIDIWKMVQKKEVYKDWTLTIVGEGEL  
 KKTIEQKIKAYELENSVILKPFTKEIEKEYLQASIYAMTSLYEGFPMVLVEVSSYGVP  
 LVSFINTGPSDIIENKKSGLIEDGNLQEFADKICLLMDNENLRKQMGQNAKEKIQN  
 EFSKEIIMQKWIKLINS"

gene complement(61270..62817)  
 /locus\_tag="DMACINML\_01143"

CDS complement(61270..62817)  
 /locus\_tag="DMACINML\_01143"  
 /inference="ab initio prediction:Prodigal:2.6"  
 /inference="similar to AA sequence:RefSeq:AVS37635.1"  
 /codon\_start=1  
 /transl\_table=11  
 /product="glycosyl transferase family 2"  
 /protein\_id="Prokka:DMACINML\_01143"  
 /translation="MNLEKISVIIIVKNAQNTLFECLNSLKEFGEIILLNNESTDDTL  
 KIAKEFQKEFAHLYIYESKFIGFGALKNLALSHAKNEWILNIDADEILENEAKEELKK  
 LEFKEQNILALTRKNLYKGEWIKACGWDPDHVLRVFNKKHTKFSENLVHESLILHPNT  
 QKVYLKNGLKHFAFESIDDLDDKQKYSKLWALQNLHKEGICKALVRGFWTFFRNYV  
 LKKGIFYGYKGFIIISVCNGLGAFFKYMKLYELKKQKPKTCALIITTYNQPKRLALVLD  
 SVKNLDPLPNEVLIADDGSKEDAKLIQEYQKNFPCVLKHIWQEDKGFRAAASRNKAI  
 NASNSEYIILIDGMILEKSFIAHDLKFARLKTILQGSRTILNENESKEILKNDFKL  
 AFNKKKLKNKKNDFLACLIYNFSKTNKNFFKKSHLVKGSKTCNMSFYKSDFEAIEGFN  
 EKFBVWGREDESEFVARFLFNNGLFRRLKFNALAYHIYHEENSKNMLESNHQIYLDTIK  
 NKKVTWK"

gene complement(62814..63701)  
 /gene="htrB"  
 /locus\_tag="DMACINML\_01144"

CDS complement(62814..63701)  
 /gene="htrB"  
 /locus\_tag="DMACINML\_01144"  
 /inference="ab initio prediction:Prodigal:2.6"  
 /inference="similar to AA sequence:RefSeq:ADN91306.1"  
 /codon\_start=1  
 /transl\_table=11  
 /product="Putative lipid A biosynthesis acyltransferase"  
 /protein\_id="Prokka:DMACINML\_01144"  
 /translation="MNKDYLILSAYYILKFLVHTMPNFILNFLAFVSKIVFKLDKKH  
 RKIIDINLKLCPHKNERKELAFKIYNNFAKFGIDCIKNQNTSKEKILDKVVFNE  
 EILTQALKEQKGVIFATAHYGNWELLSLAYAAKFGAISIVGKQLKSQKMTDLLAKNRT  
 QFDIELIDKKGGLRKMLSAIKNKRALGILTDQNCTDNEGIKLDFFGKRVNYQAGASIL  
 ARKTGALIIPAYIYQGEDKKFHIKFFKTLDPNLSLEELTKYQAKTCEEMIRFKPDEY  
 FFFHRRFASYDEKLYKGIK"

gene complement(63694..64722)  
 /gene="waaC"  
 /locus\_tag="DMACINML\_01145"

CDS complement(63694..64722)  
 /gene="waaC"  
 /locus\_tag="DMACINML\_01145"  
 /inference="ab initio prediction:Prodigal:2.6"  
 /inference="similar to AA sequence:RefSeq:CAL35250.1"  
 /codon\_start=1  
 /transl\_table=11  
 /product="heptosyltransferase I"  
 /protein\_id="Prokka:DMACINML\_01145"

```

/translotion="MKIAIIRLSALGDIIQSAVVLQFIKKFKKDIEIHWFVDEKFEGI
LKNHPLIDKLYALPLKDKKIVQSLKILLKARKNNYNAVMDLQGLVKSALVSRILSRNN
FGFDKNSLKESFAHNFYQKLNIDYNENVFVRYLSLASFTLNKYFDPKDLAFKEDVFS
VDEKLLQLLIEKQLAKNKKNILIHVGSSEENKIYPKTKLALLCKLIIKEFPEIKIFL
GWGNVKEYEFAKEVIELGAISQDNIEIAPKFSLEELIVFTKSMDLIIGNDSGPTHAF
ALNRPSITIFGATPSHRNAFKTNINKIIDTGKKITNAKHLDKSDFCISTIEEEDILKL
VKELLGDE"
gene 64788..65579
      /gene="wlaX"
      /locus_tag="DMACINML_01146"
CDS 64788..65579
     /gene="wlaX"
     /locus_tag="DMACINML_01146"
     /inference="ab initio prediction:Prodigal:2.6"
     /inference="similar to AA sequence:RefSeq:ADN91304.1"
     /codon_start=1
     /transl_table=11
     /product="Polysaccharide biosynthesis protein"
     /protein_id="Prokka:DMACINML_01146"
     /translation="MMKNEGYICIFDCESIPDIDLIRKTLAFEGEDLEVSLKALEWQK
EQSGNEFLPLPYHKIVSICAVISDHYGKFIKVNKIDGENEKEMIHNFFAFIEKYEPKL
VSFNGKNYDMPLLVLRALKYNIKAANYLDTQSDKWNNYKTRFSELKHCDLFESFGSTR
GLKLDTICAMADLPGKYDVHGDEVKLYYEDKIEKIEHEYCESDVLNTYMLFLKYELIK
GNVSDDEDYAYFLNSMSEFLKAKKANRAYVEIFCKACENEISKMKI"
gene 65636..66622
      /gene="gne"
      /locus_tag="DMACINML_01147"
CDS 65636..66622
     /gene="gne"
     /locus_tag="DMACINML_01147"
     /EC_number="5.1.3.2"
     /inference="ab initio prediction:Prodigal:2.6"
     /inference="similar to AA sequence:RefSeq:CAL35248.1"
     /codon_start=1
     /transl_table=11
     /product="UDP-GlcNAc/Glc 4-epimerase"
     /protein_id="Prokka:DMACINML_01147"
     /translation="MKILISGGAGYIGSHTLRQFLKTNHEICVLDNLSKGSKIAIDDL
QNIREFKFFEQDLSDFEQVGFALFEREKFDVAVVHFAASIEVFESMQNPLKYMMNTINT
TNLIQTCIQTGVGKIFISSTAATYGEPTTPVVSSESLAPINPYGRSKLMSEEVLRDA
NMAHPEFKYICILRYFNVAGACMDYKLGQRYPKATLLIKVAAECAAGKRDKLFIQDDY
DTKDGTCIRDFIHVDDISSAHLAALDYLENNESNIFNVGYGHGFSVKEVIDAMKRVSG
VDFKVELAPRRAGDPSVLISDASKIRNLTSWQPKFDDLDLICKSAFDWEKQC"
gene 66616..68316
      /locus_tag="DMACINML_01148"
CDS 66616..68316
     /locus_tag="DMACINML_01148"
     /inference="ab initio prediction:Prodigal:2.6"
     /inference="similar to AA sequence:RefSeq:AFU43182.2"
     /codon_start=1
     /transl_table=11
     /product="ABC transporter permease"
     /protein_id="Prokka:DMACINML_01148"
     /translation="MLKKIFFILSKEDKKFLFSLLLFSVFISFIESFAISLVMPFITL

```

ASDFSYFDKNKYLIQLKDYALPVEIIVYFGVLIIFYVLRALLNSYFHLARFSK  
GRYHAIAYKVFALNTDYENFTQKNQSEILKSITGEVYNLSTMISSFLMMSEIFVV  
LLLYTLMLLVNYKITLFLSLFMIINAFILIKVLSPIVKKAGLKREEAMKNFFEILNTN  
LNNFKLIKLTKEGVLNLFKTQSEIFARANITNESVSAMPRIYLEGVGFCVLFIVV  
FLVFNQSDISGILATISIFVLALYRLMPSANRIITSYHDLLEYRSLDIIYQILKQK  
EESLGEEKIDFDKELRLENLTFGYKDKKNLFTCLNLSIKKGEKIAFIGESGCGKSTLV  
DIIIGLLSPKEGRVLLDENELNMKNVKNYRQKIGYIPQNIYLFNDSIAKNISFGDEVD  
EEKLQRVIKQANLEHFVKNLPQGAQTKVGDGGSNLGGQKQRIAIARALYLDPEILVL  
DEATSALDTESEARIMDEIYKISKDKTMIIIAHRLSTITRCDSIYRLENGKLFKEDKK  
"

gene 68313..69389  
/gene="pglH"  
/locus\_tag="DMACINML\_01149"

CDS 68313..69389  
/gene="pglH"  
/locus\_tag="DMACINML\_01149"  
/inference="ab initio prediction:Prodigal:2.6"  
/inference="similar to AA sequence:RefSeq:CAL35246.1"  
/codon\_start=1  
/transl\_table=11  
/product="GalNAc transferase/polymerase"  
/protein\_id="Prokka:DMACINML\_01149"  
/translation="MKITFIIATLNSGGAERVLATLANALCTQHEVSIKFKHAGDSFY  
KLEENIKLITLEQFRFDLYHKIASRFKYLALRRALKENESDVFISFLDTTNIACIF  
AKIGLKTPLIIEHSNEAYLKSKIWRFLRRLSYPFCDALSVLGSSDKIYYEFVKRVK  
LLPNPCHFSTEISLNEHFENLVLFIGRLDQKNPKMFLKAISHLDKQLQENYEFVV  
AGDGELRQELEYKAKSLGVKVKFLGRVENVKALYKAKVLCCLCSFVEGLPTVLIESLY  
FEVCRISTSYNGAKDLISDSEDGLVGCDDDEIALARKLELVLKDEQLRKNIVMNAKK  
RCEDFEISHIKQWLELIDEVKNA"

gene 69382..70311  
/locus\_tag="DMACINML\_01150"

CDS 69382..70311  
/locus\_tag="DMACINML\_01150"  
/inference="ab initio prediction:Prodigal:2.6"  
/inference="similar to AA sequence:RefSeq:ALW32028.1"  
/codon\_start=1  
/transl\_table=11  
/product="glucosyltransferase"  
/protein\_id="Prokka:DMACINML\_01150"  
/translation="MPKLSVIVPTFNRSSLLQKAVQSILNQDFKLEIIISDDNSSDD  
TKSVVENLQKSDKRIKYFLNQNYKQGPNGKNNGLDKASGEFITFLDDDDDELLPYALG  
VLMQKANEGYSHVFGNCLIEKEGILSDEFSGRLEKEGEISKDFLMQRFSGEFFSVF  
KASLLKNKRFNEEFYGNATLWVNLYEKSFYIHKAFRIYRVFRKDSVTLGASKNAHR  
VYLGYLELARILENELKASGDDDYRKTCSAYYKMAAYYAKLSANYKALYHCLFKLSLI  
KINTPALILLTISIIPNKMIKLSKIRVALCKN"

gene 70299..71396  
/gene="pglJ"

CDS 70299..71396  
/gene="pglJ"  
/locus\_tag="DMACINML\_01151"  
/inference="ab initio prediction:Prodigal:2.6"  
/inference="similar to AA sequence:RefSeq:CAL35244.1"  
/codon\_start=1

```

/transl_table=11
/product="GalNAc transferase"
/protein_id="Prokka:DMACINML_01151"
/translation="MQKLAIFIYSLGSGGAERVVATLLPILSLKFEVHLILMNDKISY
EISECKIHFLERSKPSENPIKFLKLPFLALKYKKLCQKLNIDTEFVFLNRPNYIALM
AKIFGNKTRLVINECTTPSVMYAKNNFNLSLANKLLISLLYPKADLILPNSKGNLEDLL
CNFKINKAKCEILYNAIDLEKIEQKALEDISLKDKFILSVGRLDEGKNHALLIRAYAR
LKTDLKLVILGEGVLKDELLALIKDLNLEDKVLLLGFDNNPYKYMSKCEFFAFASVFE
GFSNVLIESLACGCAVCTDHRSGARELFGDDEFGLLVEVNNNSMFMGLKTMLEDEN
LRKAYKKKAKDRALDFDKVKIARNALKYLLG"
gene 71400..73544
      /gene="pglB"
      /locus_tag="DMACINML_01152"
CDS 71400..73544
     /gene="pglB"
     /locus_tag="DMACINML_01152"
     /inference="ab initio prediction:Prodigal:2.6"
     /inference="similar to AA sequence:RefSeq:CAL35243.1"
     /codon_start=1
     /transl_table=11
     /product="oligosaccharide transferase to N-glycosylate
     proteins"
     /protein_id="Prokka:DMACINML_01152"
     /translation="MLKKEYFKNPTFILFAFIILAYTFSVLCRFYWIFWASEFNEYFF
NNELMIIISNDGYAFAEGARDMIAGFHQPNDLSYYGSSLSTLTYWFYKITPFSLESIFI
YISTFLSSLVVIPLILIANEYKRPLMGFVAALLASIANSYNRTMSGYYDMDLVIVL
AMMIVFFMIRLILRKDLLSLIALPLFVGIYLWWYPSSYTLNVALGLLFIYTLVFIK
EKTLYMAIILASITLSNIAWFYQSIIIVILFSLFVLQNKRFSEFALLGILGLATLVFLI
LSGGVDPILYQLKFYIFRSESANLAQGFMYFNVNQTIQEVESIDLSIFMQRISGSVL
VFFISLVGFVLLVGKHKSMILALPMLALGFLALKSGLRFTIYAVPVLALGFGFLMSLL
QERKQKNNNTFWWANIGVFILTFLSLIPMFYHINNYKAPT VFSQSEATKLDLKEIAQ
REDYVVAWWDYGYPIRYSDVKTLDGGKHLGKDNFFPSFALSQDQVAAANMARLSVE
YTEKSFYAAPNDILKNDLLQAMMKDYNQNNVDLFLASLSKPDFKINTPKTRDIYIYMP
ARMSLIFSTVASFSFVDLDTGEISKPFTFSAAYPLDVKNGEIYLSNGIVLNDDFRSFK
INNSTISVNSIIEINSIKQGEYKITPIDNTAQFYIFYLKDSTIPYAQFILMDKTMFNS
AYVQMFFLGNKYDKNLYDLVINARDAKVFKLKI"
gene 73556..74686
      /gene="pglA"
      /locus_tag="DMACINML_01153"
CDS 73556..74686
     /gene="pglA"
     /locus_tag="DMACINML_01153"
     /inference="ab initio prediction:Prodigal:2.6"
     /inference="similar to AA sequence:RefSeq:CAL35242.1"
     /codon_start=1
     /transl_table=11
     /product="GalNAc transferase"
     /protein_id="Prokka:DMACINML_01153"
     /translation="MRVGFLTHAGASIYHFRLPPIKALIARGDEVFVIVPQDEYTEKL
KALNINIVVYELSRASLNPLIVFKNFLHLKNVLKSLNLDLLQSGAHSNTFGLMAAKC
AKIPYKIGLVEGLGSFYIEKGFKANLVRVINTLYKLSFKIADSFIFVNQANADFMQN
LGLKENKICVIKSVGINLKKFFPMRVNQETKKAFWQNLKIDEKPIVLMIARALWHKGV
KEFYESAHLKDRANFVLVGGRRDNPSCASLEFLNSGKV FYLGARSDIVELLQNCDF
VLPSYKEGFPVSVLEAKACGKAIIVSDCEGCVEAISNAYDGLWAKTKDSDKLSEKIQQ

```

gene LLEDESLRINLGKNAAKDALQYDENVIAQRYLELYDKVIKNV"  
 74679..75281  
 /gene="pglC"  
 CDS /locus\_tag="DMACINML\_01154"  
 74679..75281  
 /gene="pglC"  
 /locus\_tag="DMACINML\_01154"  
 /inference="ab initio prediction:Prodigal:2.6"  
 /inference="similar to AA sequence:RefSeq:CAL35241.1"  
 /codon\_start=1  
 /transl\_table=11  
 /product="galactosyltransferase"  
 /protein\_id="Prokka:DMACINML\_01154"  
 /translation="MYEKWIKRILDFILALFLLVLFSPILITALLLKITQGSVIFTQ  
 NRPGLNEKIFKIYKFKTMSDERDEKCELLSDELRLKAFGKIVRSLSLDELLQLFNVLK  
 GDMSFVGPRLLEVEYLYNEEQKL RHKVRPGITGWAQVNGRNAISWQKKFELDVVVV  
 KNISFLDLKIIIFLTALKVLKRSVSGVSKEGHVTTEKFNGKN"  
 gene 75268..75855  
 /gene="pglD"  
 CDS /locus\_tag="DMACINML\_01155"  
 75268..75855  
 /gene="pglD"  
 /locus\_tag="DMACINML\_01155"  
 /inference="ab initio prediction:Prodigal:2.6"  
 /inference="similar to AA sequence:RefSeq:AAW35587.1"  
 /codon\_start=1  
 /transl\_table=11  
 /product="general glycosylation pathway protein"  
 /protein\_id="Prokka:DMACINML\_01155"  
 /translation="MARTEKIYIYGASGHGLVCADVAMSLGYEECVFLDDSKGKFFES  
 SLPKYDIFIAIGNNEIRKKL FHQISQSGFKIVNLIHKSATISQSADIAEDAGILIMPY  
 VVNAKAKIEKGVILNTSSVIEHECVGGEFSHISVGAKCAGNVKIGKNCFLGISSCVL  
 PNLSLADDSILGGGATLVKSQSEKGVFVGVPAKRM"  
 gene 76550..77710  
 /gene="pglE"  
 CDS /locus\_tag="DMACINML\_01156"  
 76550..77710  
 /gene="pglE"  
 /locus\_tag="DMACINML\_01156"  
 /inference="ab initio prediction:Prodigal:2.6"  
 /inference="similar to AA sequence:RefSeq:CAL35238.1"  
 /codon\_start=1  
 /transl\_table=11  
 /product="UDP-4-keto-6-deoxy-GlcNAc C4 aminotransferase"  
 /protein\_id="Prokka:DMACINML\_01156"  
 /translation="MRFFLSPPHMGGNELKYIEEVFKSNYIAPLGEFVNRFEESVKDY  
 AQCENALALNSATAALHLALRVAGVEQDDIVLASSFTFIASVAPICYLKAKPVFIDCD  
 EIFNIDVDLLKLAIKESEKPKALILTHLYGNAAKMDEIVQICEKENIILIEDAAEAL  
 GSFYKGRALGTFGEFGAYSNGNKIITSGGMLIGKDKQKIERARFYSTQARENCLH  
 YEHLDYGYNYRLSNVLGAIGVAQMEVLEQRVLKKREIYEWYKEFLGDSFVFLDELENS  
 RSNRWLSTALIDFDKNELNSCQKCIEISQKDLILHPKISKLIADLQKEQIETRPLWKA  
 MHVQEVFKGAKAYINGNSELFFKKGICLPSGTAMSKDNVREISELIIKSIKA"  
 gene 77713..79485  
 /gene="pglF"

CDS /locus\_tag="DMACINML\_01157"  
 77713..79485  
 /gene="pglF"  
 /locus\_tag="DMACINML\_01157"  
 /inference="ab initio prediction:Prodigal:2.6"  
 /inference="similar to AA sequence:RefSeq:CAL35237.1"  
 /codon\_start=1  
 /transl\_table=11  
 /product="UDP-GlcNAc C4,6 dehydratase"  
 /protein\_id="Prokka:DMACINML\_01157"  
 /translation="MDFYKSKRLIFFLCFDAFLFMLSIFLAFSLRFSGEIPSIFYEGM  
 IKAGLILLVLKIAFLFIFRIYKVAWRFFSLSEARKIFFALALAEICFLIFIFYDDFF  
 NPFPRSVIGIDLILSYMFVGTLRISKRMLVDFKPSRAKEEETPCIVVGATSKALHLLK  
 GAKEGSLGLFPVGVVDARRELIGTYCDKFIVEDKSKIKDYVDEGIKTAIIALKLDQAE  
 LKALFEELIAYGISDVKIFSFRNEARDISIEDLLARKPKDLDDSAVASFLKDKVVLV  
 SGAGGTIGSELCKQCIKFGAKHLIMLDHSEYNLYKINEDLSLYKEKITPVLLSILDEQ  
 SLDEIIKEYKPELILHAAAYKHVPLCEQNPHTSAVLNIIIGTKILCDVAKKNKVKKFKVM  
 ISTDKAVRPTNIMGCTKRVCELYTLNSSDENFEVSCVRFGNVLGSSGVSIPKFKAQIA  
 NNEPLTLTHPDIVRYFMLVSEAVQLVLQAGAIKGGELFVLDMGEPVKIMDLAKKMLI  
 LSNREDLEIKITGLRRGEKLFELLIDENDAKTEYESIFVAKNEKMDVQILNDYIKKL  
 QDCQNVAEILKEIVPEFNHNK DGN"

gene 79702..80094  
 /gene="cheY"

CDS /locus\_tag="DMACINML\_01158"  
 79702..80094  
 /gene="cheY"  
 /locus\_tag="DMACINML\_01158"  
 /inference="ab initio prediction:Prodigal:2.6"  
 /inference="similar to AA sequence:RefSeq:CAL35235.1"  
 /codon\_start=1  
 /transl\_table=11  
 /product="chemotaxis regulatory protein"  
 /protein\_id="Prokka:DMACINML\_01158"  
 /translation="MKLLVDDSSTMRRIKNTLTRLGHNDVLEAEHGVEAWDLLEKN  
 EDIKILITDWNPEMNGLELVKKVRAEKKYEDMPIIMVTTEGGKAEVITALKAGVNNY  
 IVKPFPTQVLKEKLEDVLTGNGDSEAE"

gene 80108..80956  
 /locus\_tag="DMACINML\_01159"

CDS 80108..80956  
 /locus\_tag="DMACINML\_01159"  
 /inference="ab initio prediction:Prodigal:2.6"  
 /inference="similar to AA sequence:RefSeq:ALW55799.1"  
 /codon\_start=1  
 /transl\_table=11  
 /product="ribosomal protein L11 methyltransferase"  
 /protein\_id="Prokka:DMACINML\_01159"  
 /translation="MQKFYYELFLEIQEQYKNLFLDFVFDLGVDAIEEKNGIYIRSE  
 ENLEELAWAIEIFAQKLSQKFNLKENILLRKSIEKKENKDWVEEYKKGKIPILIDNII  
 IHTTWQEEKENYLNKINPALAFSGHHESTYGCVKFLQKFAKNNLRSLDIGCGSGL  
 AIVMAKLGCEVEICD TDDLAIKSALENAKLNNVNFAQAWHGSVDKAEGLYDLVVANII  
 ADVILILEKDIIKHLEDNAILILSGILDKYKTRIKEKFQDLELIDEMQINWCSLVYK  
 NKIKEK"

gene 80956..82902  
 /gene="ftsH"

CDS  
 /locus\_tag="DMACINML\_01160"  
 80956..82902  
 /gene="ftsH"  
 /locus\_tag="DMACINML\_01160"  
 /EC\_number="3.4.24.-"  
 /inference="ab initio prediction:Prodigal:2.6"  
 /inference="similar to AA sequence:RefSeq:CAL35233.1"  
 /codon\_start=1  
 /transl\_table=11  
 /product="membrane bound zinc metallopeptidase"  
 /protein\_id="Prokka:DMACINML\_01160"  
 /translation="MNNNNNAPNNKGNPQGNNFFNKNPIFIFAIFAIVMIIIVFKGFFD  
 GNGSLGGALNGTEVSKNVPYSELKKLIESGQINQVSIQTTIKAVSSAQNTVYTTKKV  
 SDPDFVSLLDKNIAYGAYSETNWFDTILFSWVLPVFIFFGIWMFLASRMQKNMGSSI  
 LGIGSSKCLVNSEKPKVKFNDVAGVEEAKKEEVKEIVDFLKYPERYIKLGAKIPKGLLL  
 VGPPGTGKTLAKAVAGEADVPPFFSVSGSSFIEMFVGVGASRVRDLFENAKKEAPAI  
 FIDEIDAIGKSRAASGMMGGNDEREQTLNQLLAEMDGFGESSPVIVLAATNRPEVLD  
 AALLRPGRFDRQVLVDKPDFKGRCDILKVHMKDVKISPKVKVEDIARLTAGLAGADLA  
 NIINEAALLAGRDSKKYVEQNDLVEAVERAIAGLEKKSRRINDKEKKIVTYHECGHAL  
 IAETTKGAKRVSKVSVIPRGLAALGYTLNTPENKFLMQKHELIAEVDVLLGGRAAEE  
 VFIGEISTGASNDLERATDIKAMISMYGMSEIAGLMVLEKQRNTFLTGGQTIKDYSE  
 KMAESLDDYVKKTLDERYKDVKNTLSTYKGAIETMVAALYEEETIEGAKVRDIIKTYE  
 NENLPTLRLQEIINEEHKEESKQAE"

gene  
 82902..83516

CDS  
 /locus\_tag="DMACINML\_01161"  
 82902..83516  
 /locus\_tag="DMACINML\_01161"  
 /EC\_number="4.1.1.65"  
 /inference="ab initio prediction:Prodigal:2.6"  
 /inference="similar to AA sequence:RefSeq:CAL35232.1"  
 /codon\_start=1  
 /transl\_table=11  
 /product="putative phosphatidylserine  
 decarboxylase-related protein"  
 /protein\_id="Prokka:DMACINML\_01161"  
 /translation="MGKYIAKEGHWFIAIVFILFVICWIFYSFSVLLFLLLLVLLFIF  
 RIPNRVIVCNSKAILSPIDGRVTKIENVFDKYLGESVEISIKNAFYDAGAFYTPFKM  
 DISDIVLRHGLFLCSELKSARMMNENVSIFASSGGSNVVLRİYAGSFDRKLLKLDNL  
 SLTVGDKMGFLINGTVSILLPRDTRIHVGLGDELKSGSLLGYLA"

gene  
 83526..84251  
 /gene="pssA"

CDS  
 /locus\_tag="DMACINML\_01162"  
 83526..84251  
 /gene="pssA"  
 /locus\_tag="DMACINML\_01162"  
 /EC\_number="2.7.8.8"  
 /inference="ab initio prediction:Prodigal:2.6"  
 /inference="similar to AA sequence:RefSeq:CAL35231.1"  
 /codon\_start=1  
 /transl\_table=11  
 /product="CDP-diacylglycerol--serine  
 O-phosphatidyltransferase"  
 /protein\_id="Prokka:DMACINML\_01162"  
 /translation="MNNNKSQFIYILPNLFTAASAFLGVISIVASIQGNYYMALLYII



```

FSLICDGLDGRVARLTKTTSKFGIEFDLADLIAFGAAPAIFFYMAIGSEYGRYGLI
TAFVVFVGAIRLARFNVTGTGYEPSVFIGLPIPTAAVVSIAIWTYSYYYYDFLRAYGII
FLILQAALGLLMVSNIRYPSFKKLDNFNRSSVLKVLIIILIIIVFSFLYLYPLESLVILAS
LYVLYGIVRAIYTIIFSFKFKIKS"
gene      complement(84248..85045)
          /locus_tag="DMACINML_01163"
CDS       complement(84248..85045)
          /locus_tag="DMACINML_01163"
          /inference="ab initio prediction:Prodigal:2.6"
          /inference="similar to AA sequence:RefSeq:CAL35230.1"
          /note="conserved hypothetical protein Cj1113"
          /codon_start=1
          /transl_table=11
          /product="hypothetical protein"
          /protein_id="Prokka:DMACINML_01163"
          /translation="MQKEFFNELEKILYEQNTDNKFEKFTIFYDDFKSQKLIFNHEQG
SIFKTNINPNLKLHPTRIRRPKLVNSTHSLAKIIHSIAHIEFSAINLALDASYRFKN
LPQQFYIDWLEVADEEIKHFKLLNAALNELDYKYGDFAIHDNLEAALEATKDCLNLRM
GVVHRGLEAKGLDANPFVAKLESSNHPIKSLKLDILHIILNDETKHVRKGDNWWKFS
NQNNYDFIEICKMFNQFSLAGKTLNMQARIKAGFSKAECEAIAQFYT"
gene      85225..85581
          /locus_tag="DMACINML_01164"
CDS       85225..85581
          /locus_tag="DMACINML_01164"
          /EC_number="1.8.4.12"
          /inference="ab initio prediction:Prodigal:2.6"
          /inference="similar to AA sequence:RefSeq:ALW55794.1"
          /codon_start=1
          /transl_table=11
          /product="methionine sulfoxide reductase B"
          /protein_id="Prokka:DMACINML_01164"
          /translation="MKKLNEEEARVILNKGTEAPFSGKYNNFYEKGIYLCKQCGSKLY
RSEDKFKSGCGWPSFDDEIKGAVKRLPKDGIIRTEIVCANCDGHLGHVFEFEGEFSKLN
IRHCVNSISLEFVKGE"
gene      85585..86223
          /locus_tag="DMACINML_01165"
CDS       85585..86223
          /locus_tag="DMACINML_01165"
          /inference="ab initio prediction:Prodigal:2.6"
          /inference="similar to AA sequence:RefSeq:ABV52651.1"
          /codon_start=1
          /transl_table=11
          /product="putative integral membrane protein"
          /protein_id="Prokka:DMACINML_01165"
          /translation="MFSSVGSELYLMFFAGITLLAVLNPFGLTQFLAMSDGLPLTLR
KKLFRTILYALAIIVLAFVLSGPLFMNYIFRVSLDDLRSVSGGLVLIIMAIKNLLFSTK
LATQSFDSYQEMNEKEILRQSLVPMAPMLVGPGLASVIVISEDGGLDVAFFGGVIAA
FIFMFALFHFAATIERIVGKLILHVFSRIAQVFIVAMGCKMIIIGVKNIFFNI"
gene      complement(86291..86944)
          /gene="aat"
          /locus_tag="DMACINML_01166"
CDS       complement(86291..86944)
          /gene="aat"
          /locus_tag="DMACINML_01166"

```

```

/inference="ab initio prediction:Prodigal:2.6"
/inference="similar to AA sequence:RefSeq:ADN91281.1"
/codon_start=1
/transl_table=11
/product="Leucyl/phenylalanyl-tRNA--protein transferase"
/protein_id="Prokka:DMACINML_01166"
/translation="MESSTLYSKLVDAPKDAPVFLSQKLEPNFILKAYNFGFLFPWTNK
PVTWWCPCILNPSEIHIQKNMKKFINLYQIKLDYDFLNLIHLCRTKRPQSWIDDE
FIENYHELFKQGHVHTLELYEDKELIGGIYGLIIGKVFFGESMVSLRKNASKIALIKL
CELLKPYDFIIDCQVYNKHLEFMGAKNIERKVFLDILKEKCNQESGFTNFNALINQT"
gene complement(86919..89036)
/gene="clpA"
/locus_tag="DMACINML_01167"
CDS complement(86919..89036)
/gene="clpA"
/locus_tag="DMACINML_01167"
/inference="ab initio prediction:Prodigal:2.6"
/inference="similar to AA sequence:RefSeq:CAL35225.1"
/codon_start=1
/transl_table=11
/product="ATP-dependent Clp protease ATP-binding subunit"
/protein_id="Prokka:DMACINML_01167"
/translation="MKYQENLQKYLDNAKHLSTINRHEFITCEHVLFAILKLSSDFKS
IFEELADAEFELLESELKNYIAEKNQSLDQEIEPVNSIVLDEILHHKNEIKIIDFLEK
LIQDDRTYSSFLLQKHGMNLEKIQDFKQNSEMENLSYASDLTLAQQKGGIDPLIGRK
FELERIVQILSRRKKNPILIGEAGVGKTAIVEGLALAIAEKKVPKNLQNAKIFSLDI
AGLLSGTKYRGDFEKRIKEVLEGLQKLPNAILFIDEIHTIVGAGATGESHTDFSLLK
PALSNGTLKCIGATTFMEYKNTFDKNKALSRRFAKINVDEPSQEEAFQILQGLKSKYE
DFHKIKFSDEILQQAVVWGKFFSDKYLPDSIDLIDELGASYVLNAKAKKNADIKDL
EQVLAKMTHHHKMFEDQNKALMNSLNLKAKIFGQDEVIDKLVATLKQSFAGFKNLN
TPRGVFLFTGSSGVGKTELCKVLAEFGLNLERFDMSEYAEKHSISKLIISPAGYVGY
EDGGLLSNAVRKNPFLILFDEIEKAHPDLSNTFLQIFDNAELTDNSGLKADFKNITII
IMTSNLGLKESNELGFLSKNEEKSNAIKDFFAPEFINRIDKILHFNLDLDDAVLVKII
QKELDEISKNLKNIQLVADEKAKLYLAKKAYNKEFGVRLKRIISEEIGEKISDEILF
GKLLKGGIAKIKLNKNGKLDLIF"
gene complement(89033..89323)
/gene="clpS"
/locus_tag="DMACINML_01168"
CDS complement(89033..89323)
/gene="clpS"
/locus_tag="DMACINML_01168"
/inference="ab initio prediction:Prodigal:2.6"
/inference="similar to AA sequence:RefSeq:CAL35224.1"
/codon_start=1
/transl_table=11
/product="ATP-dependent Clp protease adaptor protein"
/protein_id="Prokka:DMACINML_01168"
/translation="MPKLKVLKSKLKEPKMFKVILLNDDVTTMDFVIEILINIFYHD
FETANKIMLEVHLNGSGVCGIYTQEIALSKQKKVSNAAKLANFPLQTRVEEE"
gene complement(89323..89928)
/locus_tag="DMACINML_01169"
CDS complement(89323..89928)
/locus_tag="DMACINML_01169"
/inference="ab initio prediction:Prodigal:2.6"

```

```

/inference="similar to AA sequence:RefSeq:CAL35223.1"
/codon_start=1
/transl_table=11
/product="putative periplasmic thioredoxin"
/protein_id="Prokka:DMACINML_01169"
/translation="MKKKAILSFFIFIGFFISACSHQEDIQNDYMFEEYNKGDKIVLN
SVNGGAKTLIRTDKGFIVEGEENKVLMIIDFFGTCTPCKEEALELSKLWKNNSNKFII
MGLTHFENVSDETVKKFADDYGAYYFLSNDSQNDRIVAQILKDINYQSMEQLPFKVVM
KNGIYQKLSNYWDNNTSTNFYLGKIPTDYIQNDLNKIYKEK"
sig_peptide complement(89869..89928)
/locus_tag="DMACINML_01169"
/inference="ab initio prediction:SignalP:4.1"
/note="predicted cleavage at residue 20"
gene complement(89938..90390)
/locus_tag="DMACINML_01170"
CDS complement(89938..90390)
/locus_tag="DMACINML_01170"
/inference="ab initio prediction:Prodigal:2.6"
/inference="similar to AA sequence:RefSeq:CAL35222.1"
/codon_start=1
/transl_table=11
/product="small protein B"
/protein_id="Prokka:DMACINML_01170"
/translation="MKIIARNKKALFDYNIIEFESGVVLKGSEVVALRAGRANLKDS
FVRIIKGELFLLNAHISHLNTHSYKHDERAARKLLMHRKQIDKLLGKVSIEGYTLV
VLDLYFNHKNKVKATLALAKGKNLHDKRESLKKKQADIEARSAMKNYK"
gene complement(90387..91157)
/locus_tag="DMACINML_01171"
CDS complement(90387..91157)
/locus_tag="DMACINML_01171"
/EC_number="2.7.1.148"
/inference="ab initio prediction:Prodigal:2.6"
/inference="similar to AA sequence:RefSeq:CAL35221.1"
/codon_start=1
/transl_table=11
/product="putative
4-diphosphocytidyl-2-C-methyl-D-erythritol kinase"
/protein_id="Prokka:DMACINML_01171"
/translation="MKAYAKANIFLKLVGFDKRRYHLLSERFILLKNLFDEIYIVDKS
SNSPKGFEIISNFCEDNIITKAYWLLCQNGYQNELEEFKTKSLKLIKNIPTCAGLG
GGSSDCASFLMLINEELNLKLSTQKLIKSTQLGSDIAFFLSGFESANVSGCGEIEE
FNDTIPSLEWIFPEVSCQTKKVYDEFDKGEINFEKSILDAKIYKNLNTKELLETFKNT
QLNDLFTPCVTLYPKMFLFLQQDFFLSGSGSSVFKVHQ"
gene complement(91154..91381)
/locus_tag="DMACINML_01172"
CDS complement(91154..91381)
/locus_tag="DMACINML_01172"
/inference="ab initio prediction:Prodigal:2.6"

```

```

/inference="similar to AA sequence:RefSeq:CAL35220.1"
/codon_start=1
/transl_table=11
/product="carbon storage regulator"
/protein_id="Prokka:DMACINML_01172"
/translation="MLILSRKENESIVIGEGIEIKIVQTGKGYAKIGIDAPKSLMILR
KELLTQIKDENLHSVKNVDKLDLSDLSKLLIQ"
gene complement(91375..92193)
/locus_tag="DMACINML_01173"
CDS complement(91375..92193)
/locus_tag="DMACINML_01173"
/EC_number="4.2.1.70"
/inference="ab initio prediction:Prodigal:2.6"
/inference="similar to AA sequence:RefSeq:CAL35219.1"
/codon_start=1
/transl_table=11
/product="tRNA pseudouridine synthase B"
/protein_id="Prokka:DMACINML_01173"
/translation="MNKIFVAFKPAEMSSNAFLGQIKKRYKNKKAGYSGTLDLDPFAKGV
LIIAFGQYTKLFRFLKTPKTYRATLWLGVKSLSLDNKNIQEIKPIKAFDIKLEQIK
MELLGKVSYPQFSKRIEGKRAYEFAKKGENVLKSCEIFSCKIIHYTHPFLQL
ELSVSEGAYIRSYCELFKLLGINATLSSLERIREGDFYFNHEKSLNVLEYLNLKPNF
IKDLTKLENGTKISLEELKFQDEGFYIENEKYFSIINIKENKVEYLLNKVEKC"
gene complement(92190..94250)
/locus_tag="DMACINML_01174"
CDS complement(92190..94250)
/locus_tag="DMACINML_01174"
/EC_number="3.6.1.-"
/inference="ab initio prediction:Prodigal:2.6"
/inference="similar to AA sequence:RefSeq:CAL35218.1"
/codon_start=1
/transl_table=11
/product="ATP-dependent DNA helicase"
/protein_id="Prokka:DMACINML_01174"
/translation="MNLFTGLNESQKEAASHIDGPMLILAGAGSGTKTITTRLAYMI
GEVGIPAINLTLTFTNKAASVMKNRALSLLNSNENPLLCTFHKFGLLFLKLIHIERLG
RKNFIIIDNDDSKILKELINDDKTSPHQILQLISHFKNESKSVQDVFSDLELLKDN
EIKHQALQKIAIYYQNYQEYLLKHNFDVDFDLLLLTNTLLENDQNFQSSFYRYIT
VDEYQDTNALQYKILKNLCCIHENICVVGDDQSIYSWRGAKIENILNFQSEFSNVKL
VKLEQNYRSVGMILKAANLISHNKKRLGKTLCTKDEGEDIQILSSDNEKNESALVA
KKIKELLNSGIYAGEIAVLFRIINALSRSEAFMKEKIPYKLLSGMRFYERLEIKDLI
CYFRILINPNDLSFKRIINRPKRSIGEKALQNLQLEDYAQRKISLFEALCESDGGVGI
FSLKKAQNEAKFIQNIYKLKEYSDLKMMIEKFEELFALKEFYALQEDGDERVLNIDE
FYASIKEKIKEPPTLEDILSEISLLSDQDQIEGECVYLMVHASKGLEFDHVFIVG
LEEGFFPLNESDIEEERLAYVAITRAKKCLSLSIKSRFYRGRTELDSSRFLEESQ
LTKKISVSKTEQGYHKGDLVHKHIFGIGRVTSVNSAKEEKLTFGGIERIIMASFV
EKAV"
gene complement(94247..94684)
/locus_tag="DMACINML_01175"
CDS complement(94247..94684)
/locus_tag="DMACINML_01175"
/inference="ab initio prediction:Prodigal:2.6"

```

```

/inference="similar to AA sequence:RefSeq:CAL35217.1"
/codon_start=1
/transl_table=11
/product="hypothetical protein"
/protein_id="Prokka:DMACINML_01175"
/translation="MIEKILENENFIALMQKNCYDLLSILIQENIEFSIVANTNFIDF
NPVLPENLDVKQNPFALFVLGGYTFESIQLKNIHQFHAGFGPDDFASYVKVDLGAIT
QIQVENSVLVNFVSYKRDNTKSQKSKNIFLSNPKNKDIFKK"
gene complement(94684..96399)
/locus_tag="DMACINML_01176"
CDS complement(94684..96399)
/locus_tag="DMACINML_01176"
/inference="ab initio prediction:Prodigal:2.6"
/inference="similar to AA sequence:RefSeq:CAL35216.1"
/codon_start=1
/transl_table=11
/product="peptidase"
/protein_id="Prokka:DMACINML_01176"
/translation="MLTWDLEVLFKNEDELENTTQNYIQQSKEFKKNYSTALDKLNPD
DFLNALKEYEHLHMLSKIMTYAYLCFAKDSSKGSFYAKYEQECKKIEENLLFFELEF
CELSEKTKELIEFCKGYDFYLQNLIQNKHYNLSQKEERVMLYLSNTGANAFSRLFDE
SMAALKIPFEGNKLSEEEILSKLYNDRKIRKKAACKFTKALDKNLNLLTFIFNMIKT
ELSNICKLRGYESAETPRHLQNIQITQSVDSLQTTQKHFYLVSNFYKRKKQILGFNK
LKDYDRYAPIGKEAKFSFEESKKIILNAFYDFSPVFGDIAKEAFEKGWIDVYPQDKKQ
SGAFSHSATPDTHPFILLNYTDGRRDLFTLAHELGHITIQKLSYSVSLNQNTPLTTA
ETASVFAEMLVFDYVKNKLLKEELLALYA AKIEDIFATLYRQINFCTCFERRIHANENE
LKSEEISQIWMEESQKMFGESVELSKNYALWWSYIPHFIHSPFYCYAYAYAQLLVLAL
YGLYKSNTCADFKELYIKMLSLGGSVSPKELVGMFGFDIEDKSFWEIGIIEIKKLIDE
FMRLK"
gene complement(96409..97290)
/locus_tag="DMACINML_01177"
CDS complement(96409..97290)
/locus_tag="DMACINML_01177"
/EC_number="2.1.3.2"
/inference="ab initio prediction:Prodigal:2.6"
/inference="similar to AA sequence:RefSeq:CAL35215.1"
/codon_start=1
/transl_table=11
/product="aspartate carbamoyltransferase"
/protein_id="Prokka:DMACINML_01177"
/translation="MRHLITTKDFTNDEIMELFEEARNFLDEKPRTLLEGKSVTTIFF
ENSTRTLSSFESAARRLGARILRLDVSRSSSSKGETLYDTAANLDAMSPNAIIVRHAN
SGVPHILASHMHCPVVGDDGKHAHPTQALLDLFTIYEHFKGDIKGRKILIVGDIKNS
RVASSNTELLTRFGDLITLVAPPHFMPHSPLKKSYSLNEDLISKADIIMSLRTQTERH
NKIIYASLKDYANDFCIKLDLIKDKKLILLHPGPVHRNIDISDEVMDDERALILKQVK
NGVAIRMAVLKKLILEN"
gene complement(97296..98519)
/locus_tag="DMACINML_01178"
CDS complement(97296..98519)
/locus_tag="DMACINML_01178"
/inference="ab initio prediction:Prodigal:2.6"
/inference="similar to AA sequence:RefSeq:CAL35214.1"

```

```

/codon_start=1
/transl_table=11
/product="putative transmembrane transport protein"
/protein_id="Prokka:DMACINML_01178"
/translation="MFSKLVQSYAKGSLILQICAGIILGILVGISSKEMAEIVNLLGV
LFTNALKAIAPILVFILILTSICTRDFSQSSSKIRNIVILYIVGTFLAAACAVIASFM
FPVELILEGVQKAENTSPMHLNEIFKNLLLNIVDNPINALSSGNYLGILAWAIGGGIA
LKNCSQEAKQIFVDINEGVLKIVKFIVKLAPFGIFGLVANSVAQTGAQGLLSYAKLLV
LLVLTMLFVAFVINALIVFIYTRKNPFPLIFICLRHSAFFAFFTRSSAANIPVNMALC
AKLGINKEFYSSISIPGATINMAGAAVTIAILSLSAHHSVGIQVSFLQAFLLSIIATF
AACGASGVAGGSLLLIPLACSLFNIDYDIAMKVVAIGFIIIGVVQDSVETALNSSTDVL
FSAICSKDELNYDIR"
gene 98671..99870
      /gene="metK"
      /locus_tag="DMACINML_01179"
CDS 98671..99870
     /gene="metK"
     /locus_tag="DMACINML_01179"
     /EC_number="2.5.1.6"
     /inference="ab initio prediction:Prodigal:2.6"
     /inference="similar to AA sequence:RefSeq:AAW35561.1"
     /codon_start=1
     /transl_table=11
     /product="S-adenosylmethionine synthetase"
     /protein_id="Prokka:DMACINML_01179"
     /translation="MYLFTSEVVSAGHPDKCADIIADTIVDILLKNDKNSRVASEVFL
AGNKVVIGGEVKSNHKLSKADYDNLVKDVLKNIGYDGAGYFSKEQCLHPDEVDVMVFL
NEQSPDINQVDQEDGETGAGDQGMFGFASCEAKEYMPAAISYARALCDKVYTYAKA
HPQELGVDIKTQVTIDYGTKANFENCKPQSIHTIVSVPCVESMKIEDLRALVNKLIL
ESDLPKELFNPEKTRILINPTGKYVNHSSLHDSGLTGRKLIVDSFGGYAPIGGGAQSS
KDYTKVDRSGLYAGRWLAKNIVAAGLAKKCIVQLSYAIGVAKPTSVSVDCLGTNTGVN
DDVLSDFVMQNFSLTPNWIRDKFGLDKPSKDTFLYADVAARGQVGQKDYPWEKLDAVE
QFKTLIK"
gene complement(100233..101546)
     /locus_tag="DMACINML_01180"
CDS complement(100233..101546)
     /locus_tag="DMACINML_01180"
     /inference="ab initio prediction:Prodigal:2.6"
     /inference="similar to AA sequence:RefSeq:CDH61953.1"
     /codon_start=1
     /transl_table=11
     /product="FIG00470444: hypothetical protein"
     /protein_id="Prokka:DMACINML_01180"
     /translation="MINGINSYSNYTNNTSNTKSSNVIANNLVSQSKAIDKILG
YGVKDGFFTSDFNEAAGLPKDYKIYAKDVESFVEWETGDRYFYATHTSIDI AKTIGN
AYKVLSQLPPTTSNASLSEEALTNIPYAFVLDKLNLVTKFTFKDEYEKIDLTQDRINL
TFNTFSNVGFDKISIDNIFSHSNGDVRLNKNAYINKDGSINKGGVLIALLNSQLYGAT
SLLLLEGDTRLFGKITTDKNISDDEREAQSFMNANKIQSAFSYSSNPDEWNPFEERLS
MKLFIRSDNIGNTELSRLAIDLKEYQEMINSNMSLEEFKTKYLDKQRHDFVEKLL
KAAEKAKGIDYDKYPTGKPIDDTKAIIEAQKRRKPIQAESKNKETYKDDNKMNELKK
LLENKFSTSDELELLFGMKFSDDDIGEFNKILSLNSAPKSIDIKA"
gene complement(101848..102918)
     /gene="Int"
     /locus_tag="DMACINML_01181"

```

CDS complement(101848..102918)  
/gene="Int"  
/locus\_tag="DMACINML\_01181"  
/EC\_number="2.3.1.-"  
/inference="ab initio prediction:Prodigal:2.6"  
/inference="similar to AA sequence:RefSeq:CAL35212.1"  
/codon\_start=1  
/transl\_table=11  
/product="putative apolipoprotein N-acyltransferase.  
Functional classification-Membranes, lipoproteins and  
porins"  
/protein\_id="Prokka:DMACINML\_01181"  
/translation="MLWFWWIGLSSYFDLNYLVPIVIVIIIGIVYGILFRICYLLKFD  
FLRLCGIFCLSFHPLGFDLWNGIYTVYGFDPQSYRGIICIFLLAYIIHENYISRY  
KIAILLIVFSIGFQYDEKKSSEDLNLSYKLISTDISQDQKFLQENVSVNSDNLIKEIIQ  
AINEKKELIILPETAFANLKNLSYKMLKELSHQIIITGAFNIQEGKTYNSTYIFK  
GGNSYILNKHFLVPFGEDIPFFKETIQKYFLPNIAEFDQGPLQSKYKLNQIITNAIC  
YEATKEQNYKNSKIIAISNNAWFNYSSEYKQKLLMQFYASKHGVSVYHATNGKESG  
VIKPKEKQKIKNYFNKQDKS"

gene 103140..103412  
/locus\_tag="DMACINML\_01182"

CDS 103140..103412  
/locus\_tag="DMACINML\_01182"  
/inference="ab initio prediction:Prodigal:2.6"  
/inference="similar to AA sequence:RefSeq:CAL35211.1"  
/codon\_start=1  
/transl\_table=11  
/product="putative preprotein translocase protein"  
/protein\_id="Prokka:DMACINML\_01182"  
/translation="MAENSILTSLLPLVVLFAIFYFLVIRPQQKQAKAHKQMLESLQK  
GDKIITNGGLICEVVKPEDDFIKVKNEDNVTAKISREFIAKKIDA"

gene 103405..104985  
/gene="secD"  
/locus\_tag="DMACINML\_01183"

CDS 103405..104985  
/gene="secD"  
/locus\_tag="DMACINML\_01183"  
/inference="ab initio prediction:Prodigal:2.6"  
/inference="similar to AA sequence:RefSeq:CAL35210.1"  
/codon\_start=1  
/transl\_table=11  
/product="protein-export membrane protein"  
/protein\_id="Prokka:DMACINML\_01183"  
/translation="MRNSKITYRLVVFIAVFIQVVFSLPSFLQSERGAKINLGLDLQ  
GGLYMLLGVNDQEAVKSKIKSVASSLSYFNKENILNDGLNIHDDSLDFTLLDNADIV  
KTENLLKEINGLNVQREDMHYIVSFTPEEVKSIENFALLQAVETIRNRDQFGLAEP  
VAKQGEDKILVELAGIKTKEDELRAKERITKAAHLQLMEVDDSKMSQASNMSDAEAS  
YGLVLPDSRPNLKYPLKNIPILDGSMITDARVGLSDKSNYPVINFTLNAEGSKKFA  
DYTGANVGKRLAIVLDNKVYSAPSINERIGGGSGQISGAFTQEEARDVAVALRSGALL  
APVKLLEQRSIGPSLGADSIKMSMIALIGASIFIVFMVLYYGMAGIFANIAMLVNVL  
VVAVMAMFGATLTLPGMAGLVLTVMGAVDANVIINERIRELLREGANIKASIEQGYK  
NAMSAIIDSNITSLVTSIALYAYGTGAVKGFVTLGIGIVVSMITAIWGTGGMFDYFM  
RRIEKSNNTRFWFGYRRK"

gene 104985..105956

/gene="secF"  
 /locus\_tag="DMACINML\_01184"  
 CDS 104985..105956  
 /gene="secF"  
 /locus\_tag="DMACINML\_01184"  
 /inference="ab initio prediction:Prodigal:2.6"  
 /inference="similar to AA sequence:RefSeq:CAL35209.1"  
 /codon\_start=1  
 /transl\_table=11  
 /product="protein-export membrane protein"  
 /protein\_id="Prokka:DMACINML\_01184"  
 /translation="MQFFSEKKIYDFMRMRFAAISLSIVLFFGSIYLLWDRGLQFGID  
 FSGGTLIQLKYDTAAPIQIREILEKQGSFQNLVTEFGSKEEITIRFLGSNDSLGS  
 IGEHISTLLKDTGKFEVRRADVVGPKVGDLELRNKGIMAIIVSLVAILIYIAIRFEWRF  
 ALAAIIEIHDVVITLGAISL FKIDVNLDTLAAVLTVLGYSLNDDTIIIFDRIREGIKT  
 SKKSELTPIINESVSATLSRTVLTSGLTLATVVILYFFGGEMIQGFSLALIVGIVVGT  
 LSSIFVASPTLLWFKFSVIDFRNKELEKLRKQEKERNRAMYEKGTV"  
 gene 105966..108398  
 /gene="leuS"  
 CDS 105966..108398  
 /locus\_tag="DMACINML\_01185"  
 /gene="leuS"  
 /locus\_tag="DMACINML\_01185"  
 /EC\_number="6.1.1.4"  
 /inference="ab initio prediction:Prodigal:2.6"  
 /inference="similar to AA sequence:RefSeq:CAL35208.1"  
 /codon\_start=1  
 /transl\_table=11  
 /product="leucyl-tRNA synthetase"  
 /protein\_id="Prokka:DMACINML\_01185"  
 /translation="MAYDANLIEKKWQEIWDKNEYFEPKDDLTLPKKYILSMFPYPSG  
 RIHMGHVRNYSIGDAIARYRKYGYNVLHPIGFDSFGMPAENAAIKHKIHPKSWTYEN  
 IAYMKNELFSLGFSFSKKRMLATSDPLYTKFEQEFFIKMYEKGLIYTKEANVNWCEQD  
 QTVLANEQVEDGKCWRCGHEVVQKKMPGYVVKITAYAEELLSELENLKDkWPSQVLT  
 QENWIGKSEGLEFSLNLDKKSLEKAKTQSFVFTTRADTIYGISYVALAPEHKIVQNL  
 IQANCLDDEKVEQIKNMQKQSARERQMADKQGCFLGIYAIHPLTQEKL PVVAVNFVLA  
 DYGSGAVMAVPAHDERDFEFANKYKLEIKQVIECEDAQLPHVQKTGKLIQSGEFNGLD  
 CNEARARIISKFEDEKLGKRVINFKIRDWGVSRQRYWGAPIPMVKCKACGIVPQKIEN  
 LPITLPEDIQITGEGNPLEKHPTWKNCTCPKCGQEAQKESDTLDTFFESSWYFARFAS  
 DEKTWQEKALDKESVRYWMNVQYIGGIEHAILHLLYARFFQKVLKDLGYLEDNEPFA  
 KLLTQGMVLKDGAKMSKSKGNVDPDDIINKYGADTARLFILFAAPPAKELEWND  
 DAV EGAYRFICRLYDRAQNV RAGELLEFKHEDLNKEEKYARLKVYEALKKSFEVYTQSF  
 AF NTLIAACMEALNALAACKNEALEQEA FYIILNILEPIIPHVCFELSDKLFKCNFKVL  
 KLKEEVFKDSLNLGISVNGKKRGEVEVSSSASQDEILELAKQKVS KWLEGNIVKEI  
 YVEGKLVNLVIK"  
 gene 108395..108907  
 /locus\_tag="DMACINML\_01186"  
 CDS 108395..108907  
 /locus\_tag="DMACINML\_01186"  
 /inference="ab initio prediction:Prodigal:2.6"  
 /inference="similar to AA sequence:RefSeq:CAL35207.1"  
 /codon\_start=1  
 /transl\_table=11  
 /product="putative lipoprotein"



```

/protein_id="Prokka:DMACINML_01186"
/translation="MKGILFFIVALFLGACGYIPTSKVADNIFNDKVYVNVLSLQDP
RNSIFVADTLKEMVISKLRKALKHEADDVINVRMNNLEFIPLVYDQNGYVVSYKAK
LNLEFKVVFKDGTVEHFNTSGSYNFDISPNSIISDSARYEAIRAASSEAFDEFISVIA
IKGQKRATQY"
gene 108891..110294
/locus_tag="DMACINML_01187"
CDS 108891..110294
/locus_tag="DMACINML_01187"
/inference="ab initio prediction:Prodigal:2.6"
/inference="similar to AA sequence:RefSeq:CAL35206.1"
/note="hypothetical protein Cj1089c"
/codon_start=1
/transl_table=11
/product="hypothetical protein"
/protein_id="Prokka:DMACINML_01187"
/translation="MLPNINEIAKETLITLKDRLRPTPENYTEIFEELSCKYGLISS
NKAKLEKYKALLLPNYQQELNSKSIRTLEELISFLISALNRQNGKQFSEFFDFLATLS
KSLQVSRDKKIRDLAKITSIRISKTMDESEIYLLSKKWKEFEKSYNESDLEGLRRYG
IAKYDDFDTVVRKLLNKLEERSLEVFAELLTSLNPSLVEDLKIHGFAQNLQRPFL
SESSFKNELLE FVNRRVMVDNMYVQKNLNFNDNLKKIYELFILLNKSNEQNIDFINT
LKPDKGEVKLSFELLKQKFMQLSEKINSLNAQIEFTQNLEERESWSVLKELERLDEN
YNKYKVNYSLALFSIKNYRFIMEKYGVGSLNEIFVRFKILKESCTEFDELWMLDEKS
YLIISPGRNKEKVAQLVRENKTIENFRFIYKKDIITPKIITAYLDKQSMPHVNILEK
LINEISNLDERNDAKDQ"
gene 110266..111453
/gene="folC"
/locus_tag="DMACINML_01188"
CDS 110266..111453
/gene="folC"
/locus_tag="DMACINML_01188"
/EC_number="6.3.2.12"
/inference="ab initio prediction:Prodigal:2.6"
/inference="similar to AA sequence:RefSeq:CAL35205.1"
/codon_start=1
/transl_table=11
/product="folylpolyglutamate synthase/dihydrofolate
synthase"
/protein_id="Prokka:DMACINML_01188"
/translation="MKETMQKISKVDEFLAQKSTNYDKIDRFVMFRMYEKYKTNFLVK
PIIHIIGTNGKGSTGRFLTQLLEGLGFKVGHYTSPIHIFEFRERFYKNGDSVSENDLEL
AHKNLLDIFKEDLKKLSYFEYATFLAVELFKDCDYMI FEAGVGG EYDATSVFDKLSI
FTKVGFDHTQILGDTLEKIARTKFKVMAKQALISNEQDERVLQMAQKIASLKNTKLYF
SWQPKGEILEQLDDYVQKYNLPEFLRHNLILALNALEILLSKEKLSQALLKLGKLLK
GRCEQVASNLYVDVGHNVMAANALCKKFIGEKLVLVYNSYLDKIDIFEILKTLKPIIDT
IKIYKYISLERKLANDEIYQVANDLNL RCEEVSLDERKKT LVFGSFALVESFLKEWS
DKK"
gene 111440..112342
/locus_tag="DMACINML_01189"
CDS 111440..112342
/locus_tag="DMACINML_01189"
/inference="ab initio prediction:Prodigal:2.6"
/inference="similar to AA sequence:RefSeq:CAL35204.1"
/codon_start=1

```

```

/transl_table=11
/product="putative peptidase"
/protein_id="Prokka:DMACINML_01189"
/translation="MIKNKFTITITDINGSRHFYLNQIIKKIVLYVVAFIFLFLIFSG
FYIKYLDKLSDISTKREELAKSKELELANAQMQKNVEEKAKQYAAIEDKIASFEEA
LGLEAENLITDRLDNLKLTNEQQIGILGQIPNGWPIENKGVTFNGFWREHPLLKRR
EFHPGIDLRAAVGTPIYAPANGVVEFSGYSNDNGYGYNVILLHNFNGKTVFAHMVRKDV
VKAGQFVNKGQLIGYTGNTGLSTGPHLHYEVRFINKTLEPLYFLNLERKNMNEFFNQE
RRVPWQSLIKAVTAQHLAPVPKQQ"
gene 112387..112674
/locus_tag="DMACINML_01190"
CDS 112387..112674
/locus_tag="DMACINML_01190"
/inference="ab initio prediction:Prodigal:2.6"
/inference="similar to AA sequence:RefSeq:CDH62918.1"
/note="Protein of unknown function, DUF583 superfamily"
/codon_start=1
/transl_table=11
/product="hypothetical protein"
/protein_id="Prokka:DMACINML_01190"
/translation="MLHVDGELNGIVHSEIVVIGKNGNLKGLKADKIVVNGCFEGD
LEADSLEILAGGVSGNISIKDLAIENGGRFNGTSKIKQEEPVRLLSENSSE"
gene 112674..115613
/gene="mfd"
/locus_tag="DMACINML_01191"
CDS 112674..115613
/gene="mfd"
/locus_tag="DMACINML_01191"
/inference="ab initio prediction:Prodigal:2.6"
/inference="similar to AA sequence:RefSeq:CAL35202.1"
/codon_start=1
/transl_table=11
/product="transcription-repair coupling factor"
/protein_id="Prokka:DMACINML_01191"
/translation="MQANFFEYLQGSNIAQLVLCEDDKESFLLSQVALFKGLKTFVLP
DFRAEFGDDLRAFSEKLELCKVLNAYHKEKDTKILISPLSTILKPLPGQKHLKSYNL
SKKNAFDLGEFKNELIKLGYEFVDMVQDKGEVSIRGEIIDIFCINEELPTRVLLFGDE
LESIRKFDPMNQSFPEYEELEICPFLTYFSEENYEDFKDKLENFNSDVLVNDINSL
GFWCIDDFCDYLELDFISIKKFNQEEWDKDLKINAKIIPQASVYKDLKSSYNKDFFS
LHQNKIILAKNEALFKALELNTQNISFQKSDLILNLISNQLIISLNHKEKQKYK
RKANLIIDELKIGDFIVHEDYGVGKFLGLEMISISGAKKEFVAIEYQNSDKLLLPVEN
LYMIDKYL GASGGIPLDRLGKMTFIRLKERLTKLLAIASEIVIMAAKRALIKPKEI
KIDYADQAYFVSKAGFSYTDQNKACEEILNDFENGKVMDRLLSGDVGFVKTEVAMNA
IYPVVKSGFCAFFAPTLLSHQHYKSLKRFEPFDIEVFKLDRFTSTKEKKTLMNL
EQNKPCVIGTHALLNVECENLALVIIDEHFKGVKQKEKLELTQNSHLLSMSATPI
PRSLNQUALSSIKSYSVLQTPPEDRLDVRTFVKENDDALLKEAITRELRRGGQIFYYIHN
HIASIEQCKHLLDLFKNLRILILHAKIDAKIQEEMLKFENKEYDLLLSTIVESGI
DLPNANTMIVERSDRFGMADLHQLRGRVGRSDRQGYCYFLVENKEELTQDALKRLISL
ESNSYLGAGSVLAYHDLEIRGGGNLLGIDQSGHIEQIGLSLYLKMLEDLNLTKKES
FEEKIDLKL TINAF LNSELINEDRLRLELYRRLSKCKNIDEVYEIEGEIEDRFGKLD
LYTKQFLMLIIKILALGKFTISNFEQNIQFVKINDEKEFIKARSKDDDDIIEAVLT
YLRKDRQ"
gene 115610..116374
/locus_tag="DMACINML_01192"

```

CDS 115610..116374  
/locus\_tag="DMACINML\_01192"  
/inference="ab initio prediction:Prodigal:2.6"  
/inference="similar to AA sequence:RefSeq:CAL35201.1"  
/codon\_start=1  
/transl\_table=11  
/product="putative ATP/GTP-binding protein"  
/protein\_id="Prokka:DMACINML\_01192"  
/translation="MIDWDKTYAAIYRSRKDYLKPIVDLDNISLNDLLGMEEQKNALY  
QNTLNFHDKGANHALLWGAKGTGKSSLIKAI FNEFKDKGLRLVELAKDDL FALVDII  
DELREQPFK FILFCDDFSFEKNDDSYKFLKPLLEGSIEAPPRNIIYASSNRRHLLSE  
SISDNQGVQVAHAELHASDAAEERLSLSDRFGLWLSFYQGNLNEYLKLVDVFYFKDIKC  
DKELLHKKAKEFSNLRASRSGRTAKQFYLA FKESIE"

gene 116371..117054  
/locus\_tag="DMACINML\_01193"

CDS 116371..117054  
/locus\_tag="DMACINML\_01193"  
/EC\_number="4.2.99.18"  
/inference="ab initio prediction:Prodigal:2.6"  
/inference="similar to AA sequence:RefSeq:CAL35200.1"  
/codon\_start=1  
/transl\_table=11  
/product="putative nuclease"  
/protein\_id="Prokka:DMACINML\_01193"  
/translation="MNGADIFKLLACNLDFKEFDWLENQGLSDFELLISVILTQNTK  
WDNVLKALNNLKNAQISSLEQLLNLSNLELATLIKPSGFYNTKAKRLKELASNILDY  
SDIENFKKNVDREWLLNIKGLGFESVDSILNYLCKREILVVDSYQRLAMHLGYEFEN  
YEELREFFESGIENEQENLCQILEKKYELFELYQIFHALIIAFGKAAFKGAKLTLEGE  
NLIQNLKEE"

gene 117054..117866  
/gene="thiD"  
/locus\_tag="DMACINML\_01194"

CDS 117054..117866  
/gene="thiD"  
/locus\_tag="DMACINML\_01194"  
/EC\_number="2.7.4.7"  
/inference="ab initio prediction:Prodigal:2.6"  
/inference="similar to AA sequence:RefSeq:ADN91254.1"  
/codon\_start=1  
/transl\_table=11  
/product="phosphomethylpyrimidine kinase"  
/protein\_id="Prokka:DMACINML\_01194"  
/translation="MKAKGSDLIPVLSIAGSDCSGGAGIQADLKTFSAHNLF GMSVVL  
SVVAENTARVISVHDIPVQSVDEQMLAVFEDIVPKATKIGMIGTCELMCVARNLEKF  
KPQNIVIDPVMFAKNGFALMPQENCDFFKKTIVKFADILTPNIPEAEFLCDFKINDEK  
DMIKAAKYLCTQGAKAVLLKGGHSEENANDV LFDGNEIFILKGERIETKNTHGTGCTL  
SSAIASNLALGKDLYNAVSEAKEYVRNAIYYS LNLGKGCPTNHFFRFLNEK"

gene 117856..118488  
/gene="thiE"  
/locus\_tag="DMACINML\_01195"

CDS 117856..118488  
/gene="thiE"  
/locus\_tag="DMACINML\_01195"  
/EC\_number="2.5.1.3"

```

/inference="ab initio prediction:Prodigal:2.6"
/inference="similar to AA sequence:RefSeq:CAL35198.1"
/codon_start=1
/transl_table=11
/product="thiamin-phosphate pyrophosphorylase"
/protein_id="Prokka:DMACINML_01195"
/translation="MKNDLDLSLYLVASRGKKSDELFLNTLEEAIKGGVSIIQLREKE
LNSREFYKLGKLVQKLCKEYQIPFLINDRIDIALALDADGVHLGQEDLEVYLARKILG
KEKIIIGLSLKNLEQLKNIIEGVDYLGCGAIKATPTKESSVISLETLSQICEKSPVGVVA
IGGIDKELIKKLGKIKISGIAVVRAIMDAQDAYLAAKELRQEMNENLSFK"
gene 118466..119095
      /gene="hemD"
      /locus_tag="DMACINML_01196"
CDS 118466..119095
      /gene="hemD"
      /locus_tag="DMACINML_01196"
      /EC_number="4.2.1.75"
      /inference="ab initio prediction:Prodigal:2.6"
      /inference="similar to AA sequence:RefSeq:CAL35197.1"
      /codon_start=1
      /transl_table=11
      /product="putative uroporphyrinogen-III synthase"
      /protein_id="Prokka:DMACINML_01196"
      /translation="MKIYLLNETAFEGVENLVLNEIIFYDFSVNLDEFDALICTSKNA
LKALKKTKNSLNLNLDINVYAVGQGTAEFAKDMGFKKVQFAPKSYGSELFNHFKEELKNQ
KCLYLRAENIASTLNLDLRSYGVDLKEIIVYKNVFKESKQTIHPAIFIFTSPLSVEN
FLRQYNLEKEDKVIAIGQSTAKKLTHIDHLFISSKQDLKECVKLAKSLI"
gene complement(119088..119540)
      /locus_tag="DMACINML_01197"
CDS complement(119088..119540)
      /locus_tag="DMACINML_01197"
      /inference="ab initio prediction:Prodigal:2.6"
      /inference="similar to AA sequence:RefSeq:CAL35196.1"
      /codon_start=1
      /transl_table=11
      /product="putative periplasmic protein"
      /protein_id="Prokka:DMACINML_01197"
      /translation="MKRAYILLSLVFLISALGIWLSLNTTSSYTPRFVKDAYYYLQA
QILADEKLAKYLLYQAKLDGKECLNSVILHYPNLNDKIKIQYHYPIAQCKNFKFQAIN
K DANLSQDGIIIAHISIALNTQKNVND EILINKTFILRTKESFWNQAK"
gene complement(119537..120205)
      /locus_tag="DMACINML_01198"
CDS complement(119537..120205)
      /locus_tag="DMACINML_01198"
      /inference="ab initio prediction:Prodigal:2.6"
      /inference="similar to AA sequence:RefSeq:CAL35195.1"
      /codon_start=1
      /transl_table=11
      /product="putative periplasmic protein"
      /protein_id="Prokka:DMACINML_01198"
      /translation="MNKAFSLFETILVLILAGFLAVFLSRTLWEFYLLNNQQLKMKEL
ILKTHLSVLRLEKLLQSCVDIALESNHISCLIKDDL LYDDNKAKLLNSSLILENNTS
LYSPNSNFKLQLQNRKELYNDKQNIYVALVGKEIKKIFIHSENNITTSFKGNFIPIQA
RIKFLKEDKIHVELYPYFDNRLEQYSIFMDNVSLFEIQKQKLLCLKEYEQEYCLTK

```

RLF1"  
 gene complement(120198..120503)  
   /locus\_tag="DMACINML\_01199"  
 CDS complement(120198..120503)  
   /locus\_tag="DMACINML\_01199"  
   /inference="ab initio prediction:Prodigal:2.6"  
   /inference="similar to AA sequence:RefSeq:CAL35194.1"  
   /codon\_start=1  
   /transl\_table=11  
   /product="putative periplasmic protein"  
   /protein\_id="Prokka:DMACINML\_01199"  
   /translation="MKVAFSLLLELILCIVILGLIFASISKLFYQLNKNHEYLNYFERL  
 YTLQDKLYINPHQKDIKLVQNLKTLDFKENYVDDKIFQFKKLHIQDQDYSLYFYNE"  
 gene complement(120500..121237)  
   /locus\_tag="DMACINML\_01200"  
 CDS complement(120500..121237)  
   /locus\_tag="DMACINML\_01200"  
   /EC\_number="1.5.1.2"  
   /inference="ab initio prediction:Prodigal:2.6"  
   /inference="similar to AA sequence:RefSeq:CAL35193.1"  
   /codon\_start=1  
   /transl\_table=11  
   /product="pyrroline-5-carboxylate reductase"  
   /protein\_id="Prokka:DMACINML\_01200"  
   /translation="MKADLYILANGAMAQALAYGLKDSYNIYIVGRNLEKLNLEKEG  
 FKTLKYKDFDIENKNIILAFKPYALESVAANLKGKAKILISVLANTNFDKLRLEAEN  
 YARIMPNTAAKYKASTTPYVLKNSNFKDEIIEILNTFGKAYELSEEKQMNAAMAISGC  
 APAFLALVAESIANAGVYEGLSKELSLNLRSLFKSAAALLENEHPAIIKENICSPAG  
 VTIKGIKRVLEQKGIKRGTFEALNASAT"  
 gene complement(121237..121626)  
   /locus\_tag="DMACINML\_01201"  
 CDS complement(121237..121626)  
   /locus\_tag="DMACINML\_01201"  
   /inference="ab initio prediction:Prodigal:2.6"  
   /inference="similar to AA sequence:RefSeq:CAL35192.1"  
   /note="conserved hypothetical protein Cj1075"  
   /codon\_start=1  
   /transl\_table=11  
   /product="hypothetical protein"  
   /protein\_id="Prokka:DMACINML\_01201"  
   /translation="MTLAVKCPILGFEETKNMEFSTIDEVFRRLKSLDGKDFSFVLID  
 PYLIRPDYEFEEIPTYYQELLSLTPESNMKIFNIVAIKSIIEESTVNFAPVWINLDNN  
 SMVQVILDTVAYPDFQADQIANIYIKK"  
 gene 121792..122439  
   /locus\_tag="DMACINML\_01202"  
 CDS 121792..122439  
   /locus\_tag="DMACINML\_01202"  
   /inference="ab initio prediction:Prodigal:2.6"  
   /inference="similar to AA sequence:RefSeq:APA47507.1"  
   /codon\_start=1

```

/transl_table=11
/product="outer membrane protein assembly factor BamD"
/protein_id="Prokka:DMACINML_01202"
/translation="MKKKFFLCILLGILFSACSTKNDEGLYNLSASEWYKQIIKDLQD
KDLEKADDHYNGMASEHIADPLLETTQIILAQAHMDEEYQLAEFYLDYENKFKGNSR
NADYIRYLKIKAKFDAFAVPNRNQALMLESQKEIDSFLNDYPYTEYEPLVQTMLTKFN
LAVFYLNDTIRDLYERTGHTQSAEIYQERLQESEFYHQSIKPELPWYRSIFEKF"
sig_peptide 121792..121860
/locus_tag="DMACINML_01202"
/inference="ab initio prediction:SignalP:4.1"
/note="predicted cleavage at residue 23"
gene 122455..124830
/gene="lon"
/locus_tag="DMACINML_01203"
CDS 122455..124830
/gene="lon"
/locus_tag="DMACINML_01203"
/EC_number="3.4.21.53"
/inference="ab initio prediction:Prodigal:2.6"
/inference="similar to AA sequence:RefSeq:CAL35190.1"
/codon_start=1
/transl_table=11
/product="ATP-dependent protease La"
/protein_id="Prokka:DMACINML_01203"
/translation="MQIEEMQNYPDLPIILVEDELFLYPFITPIFISDSANMKALDL
AIKNSMLFVAPSKLENGRSFDEIYDCGVVGTIMRKVPLPDGRVKILFQGYAKARIVK
ALSSKPLEAKIELIKEEFLEGAKKEALLDVLKEKVRVLANVSHYFSPDLLRTIDEGLD
ASRICDLILNTRIRIKKQEAYQFFILTNLEEKLLKLIDLIAQIEANKIQKEIKNKVHS
RIDKVNKEYFLKEQLRQIQKELGSDNQKEDELRDYKKELESKKKFMHEDAYKEIKKQI
EKFERIHQDNSEASMIQTYIETALDVPFEKIAKKKLDIKEVAKQLNHDHYALNPKKER
IEEYFAVRELLEKRGDIADKDGAKVILCLYGGPGVGTSLANSVAKALKRELIRIALGG
LEDVNELRGHRRTYIGAMPGRITQGLIEAKQINPVVVLDEIDKLNRSFRGDPSAVLLE
ILDPEQNSKFRDYLLNFNLDLSKVIFIATANDISNIPAPLRDRMEFIELSSYTPNEKF
HITKKYLIPDELKKHGLKSSELDINDEIELIIEYTRGVRNLRKIAELCRKSAK
KLLLENIKKVSINVKNLNEFLDKKVFIEIEKHDGENRVGQVNGLAWTSVGGDVLKVEAI
KIKKGELTLTGLDGMKESARIAFSVIKVLIDEGKIKIPKMIIDPKNNVYDSYNL
HIHVPDGATPKDGPAGITMSTAIASVFSKVKRSDVAMTGEIDLAGNVLPIGGLKEK
LIAAYKADIKIALIPKKNYERDLKDIPDEVKDNMKIIGVTDGFEVLKYALV"
gene complement(124882..125142)
/gene="rpsR"
/locus_tag="DMACINML_01204"
CDS complement(124882..125142)
/gene="rpsR"
/locus_tag="DMACINML_01204"
/inference="ab initio prediction:Prodigal:2.6"
/inference="similar to AA sequence:RefSeq:CAL35189.1"
/codon_start=1
/transl_table=11
/product="30S ribosomal protein S18"
/protein_id="Prokka:DMACINML_01204"
/translation="MAEKRKYSRKYCKYTEAKVEFIDYKDTAMLKHALSERFKIMPRR
LTGTSKKYQEMVEVAIKRARHVALIPYIVDRKEVVNNPFEG"
gene complement(125153..125701)
/gene="ssb"

```

CDS /locus\_tag="DMACINML\_01205"  
 complement(125153..125701)  
 /gene="ssb"  
 /locus\_tag="DMACINML\_01205"  
 /inference="ab initio prediction:Prodigal:2.6"  
 /inference="similar to AA sequence:RefSeq:CKG90224.1"  
 /codon\_start=1  
 /transl\_table=11  
 /product="single-stranded DNA-binding protein"  
 /protein\_id="Prokka:DMACINML\_01205"  
 /translation="MFNKVVLVGNLTRDIEMRYGQNGNAIGASIAVTRRFTTNGERR  
 EETCFIDISFYGRTAEVANQYLSKGSKVLIEGRLRFEQWNDQNGQMRKHSVQVENME  
 MLGSPQGGNFNNGGNNYGANNYSNYENQSYDPYMSENNFKKAPQQVQTKVQPNQ  
 NQEKIKEIDVDAYDSDDTLDPF"

gene complement(125710..126087)  
 /gene="rpsF"

CDS complement(125710..126087)  
 /gene="rpsF"  
 /locus\_tag="DMACINML\_01206"  
 /inference="ab initio prediction:Prodigal:2.6"  
 /inference="similar to AA sequence:RefSeq:CAL35187.1"  
 /codon\_start=1  
 /transl\_table=11  
 /product="30S ribosomal protein S6"  
 /protein\_id="Prokka:DMACINML\_01206"  
 /translation="MKHYEVLFIKPTLTFEEVNAKLEFVKEVLVKNGAIEIETVVPNG  
 TRKLAYKIKKYERGTYFVIYFKAPTNLIAELERILRITEEVIRFLIVKYENKKEIAAW  
 EKLSHGKQSKKEIKPLDAPEIQ"

gene complement(126272..127375)  
 /locus\_tag="DMACINML\_01207"

CDS complement(126272..127375)  
 /locus\_tag="DMACINML\_01207"  
 /EC\_number="2.7.8.5"  
 /inference="ab initio prediction:Prodigal:2.6"  
 /inference="similar to AA sequence:RefSeq:APA81312.1"  
 /codon\_start=1  
 /transl\_table=11  
 /product="CDP-diacylglycerol--glycerol-3-phosphate  
 3-phosphatidyltransferase"  
 /protein\_id="Prokka:DMACINML\_01207"  
 /translation="MKSLFLALILILGFKFYIEFLATILVISFLIFFHELGHFLAA  
 KSLGVKVEVFSIGFGQSLREFKGTKYRLSALPLGGYVKLKGQDDMQPGLNQDQDS  
 YSILSPIKKIYILFAGPFFNLFLAFLLYIAIGNLGIQKLSQPQIGNIAPNSAAALAGLE  
 NNDTILAIINGIKIQSFDEISDHLSEPLKILIDRKGLENLEFIITPKLGQAYNDFGQII  
 PKAQLGVSPSGSTAIYHQGMQSINYALDESMKASTLIVKGIKILISGEVEAKNLGGI  
 ITMTELTSKAAEKSLVILLFITALISINLILNLLPIPMLDGGHILFNLYEMIFRRKV  
 PPRAFEYLSYGGMALLLSLMIFATFNDIMRVMQ"

gene complement(127372..127908)  
 /gene="pgsA"

CDS complement(127372..127908)  
 /gene="pgsA"  
 /locus\_tag="DMACINML\_01208"

```

/EC_number="2.7.8.5"
/inference="ab initio prediction:Prodigal:2.6"
/inference="similar to AA sequence:RefSeq:CAL35184.1"
/codon_start=1
/transl_table=11
/product="CDP-diacylglycerol--glycerol-3-phosphate
3-phosphatidyltransferase"
/protein_id="Prokka:DMACINML_01208"
/translation="MNIPNTLAVLRMILAPLLFFLLSYKFDNIHQSWINYFAALTFAL
AALSDFFDGFIARTLQQTTLGGILDPLADKMLTAAFLGLLLLSGKANEWIVYLILVR
EFFITGFRVVMVSENLVNASFTGKLTTFQMIAGFLTMEWIGGDILLYIALFLTLY
SGFEYIFSZYKQSKGKLQ"
gene complement(128060..128665)
/locus_tag="DMACINML_01209"
CDS complement(128060..128665)
/locus_tag="DMACINML_01209"
/inference="ab initio prediction:Prodigal:2.6"
/inference="similar to AA sequence:RefSeq:CAL35183.1"
/codon_start=1
/transl_table=11
/product="nitroreductase"
/protein_id="Prokka:DMACINML_01209"
/translation="MKTGLEIFNTRYSCRNFKNEKLLKEDLDITILEIARLSPSSGLGE
PWRFLVVQDDKKKEELAQICNQQQHVKDCAALIIIVSRLDFLDYFEDKLRKRDMSAE
IQRLDITYMPFLQSLSQEQKISYAREQAHIALASILYGANALNIASCTIGGFDKEKLD
SYLLLDTKKEKSTLVIALGYSNDEKIPQKNRFDKIVQFL"
gene complement(128665..129285)
/locus_tag="DMACINML_01210"
CDS complement(128665..129285)
/locus_tag="DMACINML_01210"
/inference="ab initio prediction:Prodigal:2.6"
/inference="similar to AA sequence:RefSeq:EAQ72242.1"
/codon_start=1
/transl_table=11
/product="nitroreductase family protein, authentic
frameshift"
/protein_id="Prokka:DMACINML_01210"
/translation="MNFKELILKRRACKLFNDKKISEEDLRFILFESGILAPSSHGFEF
WKFIVLENKEDNQKLANFCFNQENVASASHNIIIFLARKDLQSKDEFAQKQIRRFAGSK
EENFQKILKIYTHDAMDDEKELYHFAQLQCYLAMMQMSLAAMSLGIDSCMIGGYEKD
KVDNFLKLEYPFETAVILSLGYQAHEPKYPTQRLKFDEVVEFYKEK"
gene complement(129349..129774)
/locus_tag="DMACINML_01211"
CDS complement(129349..129774)
/locus_tag="DMACINML_01211"
/inference="ab initio prediction:Prodigal:2.6"
/inference="similar to AA sequence:RefSeq:CAL35181.1"
/codon_start=1
/transl_table=11
/product="putative acetyltransferase"
/protein_id="Prokka:DMACINML_01211"
/translation="MREINLKEDLEKIYPLIKQLRNLSLEDFLDKFQLATKTQHYKL

```



FAYEDKGVFKAACGVMPFNVL YHNHCLYICDFVVEALRGKGVGQSFFKKIQIWAKQQ  
 GYEELELSSSFRTQAHEFYIQKMDFEKSGFVFKKNIKL"

gene complement(129786..130874)  
 /locus\_tag="DMACINML\_01212"

CDS complement(129786..130874)  
 /locus\_tag="DMACINML\_01212"  
 /inference="ab initio prediction:Prodigal:2.6"  
 /inference="similar to AA sequence:RefSeq:CAL35180.1"  
 /codon\_start=1  
 /transl\_table=11  
 /product="putative CinA-like protein"  
 /protein\_id="Prokka:DMACINML\_01212"  
 /translation="MKHLLFLIGDELIMNENFKDYIYRSYENKFKEIHETRFQNKTDK  
 ELPFLLKLLDKYDFITLFTTPNHYATVAKILATLSEDNLVLKEDNLVDPKAYFEKDS  
 FICDFVNSKVNVIKTNPQGKLPPLLGDI FPNFAYFCLLGIDDESAVLLLLDTLTKSYEV  
 SIKSSKLLLENLTLIKASCVNFGKLDGFLTSVRNLFGQKVFLGKDPIQFIVSKLLEKKI  
 KISFAESCTGGLCASTLTKFSGVSEIFEGSIVSYSNKIKHEWLGISEGVLENQGEYSE  
 RCVYFMLKGIKFTAKPDFALAI SGVTGEQNEGLIKAGTVYIGAMFKDGTFFIQEILYLS  
 GDREFMQKQATLATFCLLLLKLPDFDF"

gene 130964..133720  
 /gene="ileS"

CDS 130964..133720  
 /gene="ileS"  
 /locus\_tag="DMACINML\_01213"  
 /EC\_number="6.1.1.5"  
 /inference="ab initio prediction:Prodigal:2.6"  
 /inference="similar to AA sequence:RefSeq:CAL35179.1"  
 /codon\_start=1  
 /transl\_table=11  
 /product="isoleucyl-tRNA synthetase"  
 /protein\_id="Prokka:DMACINML\_01213"  
 /translation="MDYKDTLLL PNTTFAMRANLAEFEPKRFKWF SKNYAYEKMKTK  
 RKEAKKAFTLHDGPPYANGHIHIGHALNKILKETIIKTHYFNGESIRFTPGWDCHGLP  
 IEQQVEIKLGDKKKSLSKKEIRSFCREHANEFVNIQRDEFKSLGVIADWDKPYLTMKF  
 EFEAAIYRTLCEIAKKGLLCERSKPVFWSWAAKSALAEAEVEYEDKEDYSIFVAFDL  
 EQSCQKLGISKASAVIWTTPWTLVANQAIALNPENYVITKEGLIFASALLESMVAK  
 GLTKGEIQKELNAKEFEKLEAINPLNSRKSILIMGEHVLMEGGSLVHTAPGHGEDDY  
 YACLKYDIEVIMPVDDGGCYDETLRHKGLLPSDLLDEFI GLHIFKANEKILELLGNHL  
 LHSSKFIHSYPFCWRTHKPVYIRATKQWFILMDEPKLKGKTLRECAKEQILKTKFYFQ  
 SGVKRIGSMVENRPDWCISRQRDWTPIAFFRDKSTKEVIFDAELDFVANIFEKHGA  
 DAWWEFEIKDLIPQNSKYNADNLEKVYDILDVWFDSGSTWNAVLNSGIYDAGEKRASM  
 YLEGSDQHRGWQSSLLVGTAINEFAPYESILTHGFTTDEKGQKMSKSKGNVIAPEYV  
 AKTYGVEILRLWILLSDYSTD LKISDNILKQVGEQYRKIRNTIRFL LANTNDLENLEV  
 EEF SFIDKWILTRATRVFKSAKENFLAYEFAKGFNVLLNFLSADLSGIYLDISKDRLY  
 CDAKNSKRRKSAQVAMALIARELLNLLAPNL TYSVDEALEHANS LIKGAQKDFDLSL  
 EEKFEYDFSIDDEFLLSVREKFFENIDILKKDKVIKSTLELNLDTNSKLLNSIPKEEL  
 NDWFMVSFDEKLQGEVLCFEVENESFRIIKATLCKCPRCWKVESAKEDEPCMRCAEV  
 LKHA"

gene 133832..135199  
 /gene="gatA"

CDS 133832..135199  
 /locus\_tag="DMACINML\_01214"  
 /gene="gatA"

```

/locus_tag="DMACINML_01214"
/EC_number="6.3.5.-"
/inference="ab initio prediction:Prodigal:2.6"
/inference="similar to AA sequence:RefSeq:CAL35177.1"
/codon_start=1
/transl_table=11
/product="Glu-tRNAGln amidotransferase subunit A"
/protein_id="Prokka:DMACINML_01214"
/translation="MITLKEALKYSKEELENLKKELNDKAKKENKIGAYIEQFLGKDL
SDGGEPIPIAIKDNISVKDWELTCASKILQGYVAPYDATAIKNLRSKGFSPYGRTNMD
EFAMGSSSATSFYGKTLNPLNFARVPPGSSGGSAAAVAGGLALASLGSDTGGSVRQPA
AFCGCVGFKPSYGRVSRVGLASYSSLDQIGVLTQNVEDAAILYDAIAGYDKMDSTSA
KVDFPTAPNLNAEKKLRIAVIENYVNEASTEVKAALLKSIEMLKANGHEIVYKNMLD
SKFDIAAYYIATAEASANLSRYDGVRYGKRSQNTENLKDMYINTRSEGFGEEVKRRI
LLGTFVLSSGYDAYYIKAQKARAFIKAKYEEILQDADLIFMPVTPPTTAFEFNACKSP
MEVYLEDIYTISLNLAGLGGISVPVVGKDKLEGLNISAQLICKAYDEQTLLDGALSLEKI
IKENK"
gene 135196..136650
/locus_tag="DMACINML_01215"
CDS 135196..136650
/locus_tag="DMACINML_01215"
/EC_number="1.1.1.205"
/inference="ab initio prediction:Prodigal:2.6"
/inference="similar to AA sequence:RefSeq:CAL35176.1"
/codon_start=1
/transl_table=11
/product="inosine-5'-monophosphate dehydrogenase"
/protein_id="Prokka:DMACINML_01215"
/translation="MNIIRKRALTFEDVLLRPCYSEVLPKQVKIHTKLTKNITLNMPLI
SAAMDTVTEHRAAIMMARLGGLGVIHKNMDIASQVREVKRVKKSSESGVIIDPIFVSPK
ASVAEAEIMAEYRISGVPVIDSDRKLIGILTNRDLRFENDYSLVENVMTKAPLITA
PKGCTLDDAEKIFSKNKVEKLPVDEQGRLEGLITIKDLKKRKEYPDANKDSFGRLRV
AAAIGVGQMDRVDALVEAGVDAVVLDSAHGHSKGIIDTVKSVEKYPNLDLIAGNIAT
AAAALCEAGADAVKVGIGPGSICTTRIVSGVGPQISAIDECAEAKKYGVPVIAD
GGIKYSGDIAKALAAGASSIMIGSLLAGTDESPGELFTYQGRQYKSYRGMGSIGAMQK
GSSDRYFQQGTAQDKLVPEGIEGRVPYVGSIKNVVHQLLGGLRSSMGVYGAKDIEDFQ
ARAEFVEITSAGLKESHVHDVTITHEAPNYKVNQ"
gene 136647..136820
/locus_tag="DMACINML_01216"
CDS 136647..136820
/locus_tag="DMACINML_01216"
/inference="ab initio prediction:Prodigal:2.6"
/inference="similar to AA sequence:RefSeq:CAL35175.1"
/codon_start=1
/transl_table=11
/product="putative coiled-coil protein"
/protein_id="Prokka:DMACINML_01216"
/translation="MSFEENLKNANESLEKLNDEKLSLDESVKIYKEGLKSIEKARLA
LEKARLEVEHIDE"
gene 136813..137592
/locus_tag="DMACINML_01217"
CDS 136813..137592

```

```

/locus_tag="DMACINML_01217"
/inference="ab initio prediction:Prodigal:2.6"
/inference="similar to AA sequence:RefSeq:CKG89713.1"
/codon_start=1
/transl_table=11
/product="carbon-nitrogen family hydrolase"
/protein_id="Prokka:DMACINML_01217"
/translation="MSKIAALQFPTLALSESRLDYLLKASKDSGANLVVLGEYVLNSF
FTELLVMPKSMIKEQSEAKKESLIRLAKKYELEIIAPYISVETKGYKKLCLKVAPNHI
KTYEQQVLPYNHWNEEKFFSNKTNKGNLKLFTFNVDKCLKALLFGFEVHFDFIWQQI
MAKKIDLIVPSACTFESKQRWEELKTRAFLNSTNILRVNRIGTTKDEWNFYGDSML
INAFGEIESRLGSEEMLIVEPKKADEARKIWAFFDKIVKGL"
gene 137728..138300
/locus_tag="DMACINML_01218"
CDS 137728..138300
/locus_tag="DMACINML_01218"
/inference="ab initio prediction:Prodigal:2.6"
/inference="similar to AA sequence:RefSeq:APA48153.1"
/codon_start=1
/transl_table=11
/product="VgrG protein"
/protein_id="Prokka:DMACINML_01218"
/translation="MGLNNEKYPFYRLGGIGISAFEKLVGLSNTLNVGVDNKVRIAKN
SHEFVGENKDIEIGANQNTIIHKDEIRNVKGNKEMVEGHYDINIKETLKIQTETKETS
IRSKNNLLITTNASMGFETDKNNTFVSNNLSQTKTDCEVKAGNQILHQVGDQTIATK
KDCVIIKAGGVEVIIDSNGLVVKGGEKAE"
gene 138300..140291
/locus_tag="DMACINML_01219"
CDS 138300..140291
/locus_tag="DMACINML_01219"
/inference="ab initio prediction:Prodigal:2.6"
/inference="similar to AA sequence:RefSeq:CKG88019.1"
/codon_start=1
/transl_table=11
/product="hypothetical protein"
/protein_id="Prokka:DMACINML_01219"
/translation="MEALNQKNSLNIRLLSSNNILLHNQEFKLYEIAQSNKSEIKTIF
TTNRIGEHLNASEIFSKEAQNFEILNQSSVYKNKPIYNHRFLRSYEGHWCEIKF
ERKADKGSINSIRLKSKEFTLENNEKIVRNFYTFGDIVEFEAIYEDTKIKEEQIKWGY
VFIQDKNTLDKLNKNQLTNDKKESSLLDEEILKDCFYIEKEEDKALLSSSIIYRHLEN
NKAYCGKHLSQLPNPKDTQEQKALLVFAYKEIPNYNASYLIRINDYPQITIDCTLAE
TLRAHTNKDEISRLGWGVSYICQRLWHDNPSDAKELKDLTFRSSTSQDFIDTIPNETM
KTIVKEILPRVEMQQLKTDNTKSRDKARFYAELDWDNFYMKFPIMQELKGEYMNLLKLL
FGEESDFQKQFEDFLNDTLDDIKNIKNTQEYTMALNIQAMKENKTKNAEVFKLYKKEE
TLPETHKAIKDLQKPSDIIDNSLYQRFDIKNDVFLPHLGLSKFDFSLQNSIQHEKE
VLDKFHNSPKYQNFALYSIAGAFNILYIPSLIQITRVTRFYNYHSLYAACKKVRAFI
IDTVNFNNNGSDQPIGAWDYEKVGFDLYSIMQYRNTKFHFKYTSPKSFLFPLYNSDF
LTKQYFNLGLDFFLYSSTFLDMDFSHTQMQDTAFIVGK"
gene 140293..140904
/locus_tag="DMACINML_01220"
CDS 140293..140904
/locus_tag="DMACINML_01220"
/inference="ab initio prediction:Prodigal:2.6"
/inference="similar to AA sequence:RefSeq:CKG88032.1"

```

```

/codon_start=1
/transl_table=11
/product="hypothetical protein"
/protein_id="Prokka:DMACINML_01220"
/translation="MFFAGGDYEPFIYGLSLIAYYFLPLYCLTLLLYKYKPYVNLTL
HIGASVLLYLAIWVIFVDTTIISLFEIFQMFLIPIILQIIHLTFILYAIITYYFDMQK
ISFTKRLGRYIVSFFIGIGLLILSFVMMYAIGYYISSWCDRYYLKIDERNEAIRTITF
YVLVVVFPSSIIALLLSYILYKNHKSFFTKILYRILSMIGKDKP"
gene 141065..141370
/locus_tag="DMACINML_01221"
CDS 141065..141370
/locus_tag="DMACINML_01221"
/inference="ab initio prediction:Prodigal:2.6"
/codon_start=1
/transl_table=11
/product="hypothetical protein"
/protein_id="Prokka:DMACINML_01221"
/translation="MSRSSFLEFIFYTIVLYGIVLLIWSVISRVNAIIHKKDFIKYWS
IYSVAYWIVAILFWSFFKSLGIYSIYEWLTLYLISIIILCIVSVIYFAIFRFFGDQKI"
gene 141507..141704
/locus_tag="DMACINML_01222"
CDS 141507..141704
/locus_tag="DMACINML_01222"
/inference="ab initio prediction:Prodigal:2.6"
/codon_start=1
/transl_table=11
/product="hypothetical protein"
/protein_id="Prokka:DMACINML_01222"
/translation="MNYIYRSTSNVDFKLSKERSNQVIALYALSGKFQIYYVLDSF
EVERMNEKEIVIYPTQFESWC"

```

ORIGIN

```

1 tagatthtaa aatgaattta ggactttatt taaaacttct taatgatttt aagactthtaa
61 ataaatttga actcataaag atthttagaag ctthtaacgca aaataatatt aagactthtat
121 atthtaaaaa caaggataaa gcttatactc ttacttcaat gttgatgaat ttaagggtga
181 ggtgagggtg cttatthttct taatthtaaac gcatataagt atthttgtag thttcattaa
241 aatataagca agatgataat ataattagag thtaaaaaaa tagcgaggaa attatgaaag
301 atthattthtt attcagttct ttacttgact caagtcatac thtttcttat thtttctatt
361 taggtthtggg ggctthtgatt gctgtcattt gtgcttcaat ggctactcgt tctatgcagc
421 ttgttccacg cggatgcaa aatthtaggtg aagcgtthttt agaagggtgtt ttgtcaatgg
481 gacgcgacac catgggagat gaaaaagggtg cgagaaaaata tcttctctt gtagcaactt
541 taggaattat agthtttctt agtaataata tcggtattat accaggctt catgctccaa
601 cagcgagtht aaatthtaaca cthtctthtgg ctattatcgt atthatttat tatcatttht
661 aaggaattcg tactcaaggt thtgtaaaat atthttgctca thttatgggt cctattaat
721 tccttgctcc thtaatgtht cctatagaag tagtatcca cthtctcgt gttgthtctt
781 tatctthtctg thtthttgga aatatcaagg gtgatgatt atthttaatg gtaatthtag
841 ctcttgctcc thtatcgcct ccgcttctctg cgtatgtht thtaacttht atggcattth
901 tacaagcatt ththtttatg atthttgactt atgthttatct agcgggtgca acgatagttg
961 aggaagggtc ttgatttata thtttagaatt thtcaagggt gctctthtgg cthtaatgct
1021 thttggcgca cthtthttct thtttaaat thattcttht thtatthtt thtttagggt
1081 thtccgggt thgctthtat thttagthtt thttgtctt atagaaaatt atgaatthaa
1141 actthaaatc aatcaagata aaagcaagta agthttatth thtaagcgtga agthtctctt
1201 thagthaaata thttacggct thcataaath thgatagctgc thttgattta thcatagtat
1261 aaagatgaat thcatccacc ccactagthaa thcaaatcaac aatthgatct atcgcataag
1321 cgatcccagc atctthctaa gctaaagtat thttthcata thttthctaaa atthttggcaa

```

1381 attaggcgg aatthtagct ccacaaagct gtgaaattht taatacttgc cthttgtttg  
1441 taataggcat aatgcctgca taaataggaa tattaatacc tgctaaagca caatthttgtt  
1501 taaaagtgta aaaatcttca ttattataga aaagttgagt gataagtttg tctgtgcctg  
1561 cgtcaacttt atthttaaga tgggtatata cttcaataaa atthcgagac tctgtgtgtt  
1621 tttcaggata gcaagctgca taaatthcaa atthctcttg cthtcggata aaagaaatca  
1681 aatcgcttgc ataagaaaa tctthacttt tthctaaatc attacacaca tcccctctta  
1741 aggcaagaat thtatcaagt tgtctthctt tgcattcttg aagtatgctc gtaatthttt  
1801 cthtgctaga atgaatgcaa ggtaggtgta ctatgctagg aatthttatat tctthctgaa  
1861 ttaagcttgc tgtthctaag gtatthtttg aatthtataga gccaccagca ccaaaagtta  
1921 cgctgatgaa attaggactt aatthtctca aatcatctaa aatthgatta agatthctaa  
1981 tgtthtcatc tctthcttgg ggaaaaatth caaaagaaaa gctacacata agacctctt  
2041 ataatthctc tctthatttht tgtgtggcaa taactaaatt thtaagagcg gctacaactt  
2101 cthcataacc cthtgtctta agtccgcagt ctggattgat ccaaatthtgc tctthtaggta  
2161 atthtgctaa gtaatthttct atggttgtgc thattthctc cacgctaggc accctagggc  
2221 tatgtatata ataaactcct ggtccaactt cgtthtgaaa ataacagct thtagagtat  
2281 ctaaaagatt aagatthgat cthgaagctt caaaagatat tacatctgca tccattgcat  
2341 caatthctth taagatatcg ctaaattcgc tataacacat atgtgtatga atthtgttht  
2401 tggthtttac tccgctatgt acaagattga aagcagggat cgcctaatct aaatactcgc  
2461 tatgccaatc gctthttctt aaaggcagtt thctcttag ggctgcttca tcaatthtga  
2521 tgatthtaat gcctgcattt tcaagatcta aaacttcatc tcttaaagct aaagctatth  
2581 gttcagtgct thctthtagg ctgatatctt ctcttgggaa agaccaattg agtatagtta  
2641 caggacctgt tagcatacct thtacgattt thttactcaa gctthgagca aatthtagacc  
2701 atgctagagt gataggttht gtgctgata catcgccca aattacaggt ggtthtacac  
2761 atctgttcc atagctthga acccagccat thtgagtaa taaaagcct thcaagttth  
2821 ctccaaaata thccaccata tcattthctt caaattcccc gtgcacaaa acatcaagtc  
2881 ctattthctc thgaatthgg atacattctt taatthtttg ttggttaaath ttagtatagt  
2941 thtgtgctga aatthttctt tgtthaaaag caagacgatt ggaacgcaca ttagcactth  
3001 gaggaaatga tcctatggtt gtagttggta aaagaggaag thctaaaaat tctthttgaa  
3061 thtgatagc ctctthaaat tcaggctthc thcaaaagtc thctthttth agagtttgaa  
3121 gtctagctth tactthttca tctaaacgat taggaatath thtaagagat tcttgattgg  
3181 ctthaaaaag aggattthct tcattgctat thtatgatagc ththtaagtct ttagaattctt  
3241 taagtttht thttgcaaaa gagaaaagtt taagataact tgaatctaath ttagttthcaa  
3301 atthctgtact ataaggaacg tgcaagagtg aacacgaggt atthtataact atatthttgag  
3361 tgtatthttg aagttctthg ataagtttht agctthttgc gtaatcatta gcatagatath  
3421 thttaccath tactataacct gcaaaaagta thttatcgtt agcaaaagca ththtttgga  
3481 thaaatthta actthcttht cthcttacia aatcaagccc caaagcatca aaatcactth  
3541 ctagaagttt agtataaata tctctthaaat ctccaaaata gctthgaagc aagactthta  
3601 ctctccctt atgtthttaa agttctthtath aaatthctt caataaagca atathctctt  
3661 gattthaaatc ataaactaaa taagttctat caagttctag ccatgctact cctaatgaa  
3721 taagtttht aagaagttca atgtatgctt gtaaaagctt gtctthtagca agttgcttag  
3781 tgtthtcatc thtaaaagct atgagtttht agagggtaaa aatthctacc aaaacaggtt  
3841 thgtthctat gccaaagttc thtgctthca gatathctth aaaaattht tcccgcctta  
3901 aagctataath gcttgcatca tcacactcag gcactaaata atgatagttt gtatthaaac  
3961 atthttctat tgctagagct atagtatctc cthttthctc thgataacca cgactthtgcg  
4021 caaaatactc atctaaagga tctaaattht agtctthata gcgtthttgga gtgatattga  
4081 aaagcacagc tgtatctaath acattatcat atagcgaaaa atcattgcta ggaatgaaat  
4141 caatcccagc atthttgata tctthccaath gtctagctct taaatthttt gcagttthcta  
4201 aaagctctt thtagaactt tgagctthtga aatathttt caatagcaaat thtaattccc  
4261 tathtgacc thttcttggg taagaaatga thgaattht catgttgtt tctthtgtt  
4321 thaaatthaa aagtaggat taaagcacc tgatathttt ctctatgaa atthtttaact  
4381 tcatcgctth gtaaagctth gactaaagct thgatttht caagatctt atthctgct  
4441 thaacagcga tgatathacc atactcacta thttthttt ctgtataaag ccatcttht  
4501 atagggttht agcccgataa aatthcaaaa thactattht tgagagagta gtctacatca  
4561 tctaaactt thtgaagctg agcatcttht aatthctacia atthtaagatt thtaggattt

4621 tttacaatat ctaagggtgt aacaagttca ctatctttaa tttcgatcaa tcccgcactt  
4681 gctactatgc gtaaagcacg actttcattt gtaggattat taggtattga tatacttgct  
4741 cctgttttag gttgaaattc cttatgtttt ttagaatata cgcctatagg ttcaatatga  
4801 atactagcaa cttttacaag atgagtacct tgtctttggg taaattcttt taaataaggc  
4861 tcatgctgaa aataatttgc atcaagttcg ccatTTTcca ccataatatt agggatcacc  
4921 ccatcattaa attcgtaaat ttttaaTca taaccttgct tttgaagagt aggtttgata  
4981 aactttaaaa tgtccgcgtg tgggacaact gaagagccca ctttaagttc ttcattggcc  
5041 caagcaaagc tcgtaaaaag agttgctatg caaaaagctt ttgcaaatat agtcatcatc  
5101 tctccttttt atgcaaaaact gaatttttct attaaatcgC tatggtaaTt gcgCgctaca  
5161 tcaggatgtg agcgtatcat tcttttaaaa taattactag caacatttct taaaagcgga  
5221 ttttttggat ctgtatccac gcccttgctt tctcgagcaa gttcaggatt taatggaaaa  
5281 ataggaatat ctttatcgag ttgtaccca aggaaataag ctatgctaaa gcgttctttc  
5341 gggcttaaat ttactcgatg tatggtagct tttaaatagc cattagtagc taattctaaa  
5401 aattctccta tattaaccac aacactacct tcaagtgggg gaactttaat ccattgatca  
5461 tcaataaaaag cctcaagtcc gttttgctct tcttgaaaaa caaaggtaat aagcccaccg  
5521 tctttgtgtg gtcctactcc ttgagtggcg tctttggagc tttttggata gtgtatgatt  
5581 ttgcaatgtt cataagaatt ttcgccatag agttttccaa aggcacgct aggcagatca  
5641 agagcttcag caaatgcttg taaaatTTTt aaacaagcat ttcttgTTTg ttcatgccaa  
5701 gctaaaaata tttctttaag ctCaggaatt tcatcaggcc ataaatTTTg accttctaTt  
5761 ctttgccata gaggcgaatt taaatcccat tttaaagctt ttctttctgt gcctatgtca  
5821 atttgctctc tataatcttt ttctccagca gtatattcaa agccttcgct tgtataacct  
5881 ctaaattgag gtgaatgcac catggagata agttctttag agcttctagg aagattgaaa  
5941 aaatctttac taagtttaaa taatttttca tttaaatTTTt tatcgatacc atgattgata  
6001 agataaaaaa aacctacatt tgaagtaatt tctcttagat ttttaagaaa ggtactTTTg  
6061 tctttttcat aaatctttaa atcaagtaca ggtaaattca ttttctctcc ttaaaattat  
6121 atttaaggat aagaagatat cttaatgttt agatTTTgtt tcgtaggatt taactaaaaa  
6181 ttaggatttt aagttgtgtt ttgaaaaaat aaaactTTTg acttttctac acattatctc  
6241 tccttatcca cttttttgga cttttggaaa cataacgtaa agccaaagga cgcactagat  
6301 actacacatc tggcacatca gtttcattct ttctccttgg gaaaattaat ttttatgaat  
6361 tgtaaaaaaa aatatattaa aaaaagctta atccttgaaa atttcaagga ttaattttta  
6421 aatattttca agttttaatt cttcgttatt catcacgcct atactagaat ttaaaacttt  
6481 ttgtgcaatt tcttttgctt catctaaaga atgcatagca caagttccac attgatagat  
6541 attgagttca ggaatTTTgt tttgatcact cacatttaaa acatctttca ttgcagcctc  
6601 ccaagcttta gcaacacttt tttcatcagg tgttccaatt aagctcatgt aaaaaccgt  
6661 acgacagccc ataggcgaga tatcaatgat ttcaaccgaa tccgaattta aatgatctct  
6721 cataaaacca gcaaacagat gctctaaagt atgtgtacct ttttactca tgatatcttt  
6781 attaggtatg caaaagcgca agtcaaatac gctaatatca tcaccctttg gtgttttcat  
6841 agtttttagct aaagcacagg caggcgctgg catttttagta tgatctactt taaaactgtc  
6901 aagtagtggc atttttaact ctttgtgtaa attattttac agattataac atttaaaaaT  
6961 aatatttaaa gcctttctaa aagaaaaaag gataaaataa agtattaaaa ttcaaggaaa  
7021 atcaatgttt gaagtagtca taggacttga agtacatact caactcaata ctaaaacaaa  
7081 aatattttgc tcgtgcgcaa cttcttttgg agaagctcca aatacaaatg tttgtcccac  
7141 ttgtttggct ttaccgggtg ctttgccggt tttaaatgaa gaagcggtaa aaaaggccat  
7201 cgcttttggg aaagcggtaa atgctaccat aaacaaaaaa agtgTTTTta atagaaaaaa  
7261 ttatttttat cctgatctac caaaagctta tcaaatttca caatttgata ttctatagt  
7321 agaaaagggt gagcttttta tcaatataaa tggtgaaaat aaacgcatag gtattacaag  
7381 agcacattta gaagaagatg cgggtaaaaa tatccatgaa aataattatt ctaaagtaga  
7441 tttaaaccgc gcaggaactc ctttgcttga aattgtaagc gaacctgaac ttagaagtag  
7501 tgatgaggca gtagcgtatc ttaaaaagct tcattctatc atacgctttt tagatatctc  
7561 tgatgcaaat atgcaagagg gaagttttag atgCgatgct aatgtaagca taagaccgaa  
7621 gggcgatacc aaactttata ctagagtgga gattaaaaat cttaatcct tccgttttat  
7681 ccaaaaagcc atagaatacg aagtaaaaag acaaagcgaa gcatgggaag atggtgttta  
7741 tgataaagaa gtcgtgcaag aaacgagact ttttgataca ataaatTTTg ttacaagaag  
7801 tatgCgtggc aaggaagaag cagcagaata tcgctatttt cctgatcctg atttattgcc

7861 tgtgctgtta aaagatgaat ttttagatat tcaaattcct gaacttcctg atgagaaaaa  
7921 aatgcgttat ataaatgaac ttggcattaa agaaagcgat gcagagggtc ttataggatc  
7981 gcttgaattg agtcgttttt ttgaaagttt gattgcttta aatttaaatc ctaagctttg  
8041 tgtaaattgg ttaaatactg aacttatggg gcttttaaaa ggggaattaa cgatagaaaa  
8101 ttctcccgta gacgcaatta aactcggcgc tttaatcaaa cgcatagaag agggcgttat  
8161 cagcgcaaaa gcggcaaagg atatttttagc ccatgttttt gaaaatccag atatggatat  
8221 tgatgagacg attgaaaaat tagggcctaa gcaagttagt gatgattcag ctatcgaagc  
8281 agtaattgag caaattttta atgcaaatgc cgataaggtc gcagaatata aaagtggaaa  
8341 agataagcct tttggtttct ttgtggggca gactatgaaa gaaggtaaag gggcctttta  
8401 tcctagcaag gtcaatgaaa ttttaaaagc aaagctgggc tgatgagcaa aatcgcaatc  
8461 atcgggtcag gaaaatgggg cagtgcctta tatagtgcct tgagtattaa taatacttgt  
8521 tttatgactt ctgcacgca gcgggatttg cttattttg tgagtttaga gcaggcatta  
8581 gattgcgaat atttggtttt tgctttaagc tctcaaggaa ttcattcttg gcttaacaa  
8641 aattttgtta acaagggtca aaaaattcct attgcttcta agggatata tacttcaact  
8701 tgtaagtttt tagatgaaat ttttagcgaa tttgtagaca gggataaact ttgtgtttta  
8761 agcggtcctt cttttgcagc cgaagtaatg caaaatcttc cttgtgcttt agttgtgagt  
8821 gggataaaaag aaaaattatg taaagaattt gcaagttttt ttccagattt tatcaaagta  
8881 tatacagatg atgatgtcgc cgggtctgaa atttgtggtg cttataaaaa tgttttagct  
8941 attgctagcg gcataagcga tggtttagga cttggaaata acgcaagagc ttctttgatt  
9001 tctagaggtc ttattgaaat gcatcgtttt ggtaaatttt ttggagctaa ggaagaaact  
9061 ttttaggac ttggagggtc aggagattta tttttaactg caaccagcgt gctatcaaga  
9121 aattatcgcg taggtttggc tttggcaaaa gaaaaaaaaac tcgatgatat tttacaggaa  
9181 ttaggcgagg tggcagaggg ggtaaaaaca gcctatgcta tagaaaagat ttcaaaagat  
9241 aaagcaattt acacgcctat tgtaaacgaa atagtacaaa tcttgcaagg aaaaaatgtc  
9301 aagcaagcgg taaaaattt attaaaaaaca aaggataatc aggagtttca atgctaatta  
9361 aaaatgctaa aatttatggt gaaaatttac aagatctttt aattaaagat ggaagatag  
9421 taaaaacagg cgcaaattta gacgataacg atgaagtatt ggatgctcaa ggaatgactt  
9481 tattgccatc ctttgtggat ttatgtgtaa atttaaaaaa tgataaattc tccctaagca  
9541 acctagaact tttagaaaag gagtgtttaa gaggaggggt tgggtctata atcttgcgtg  
9601 attgatgga ttttgatgaa gaaagttttt cacttttttt acaaaattta aaatttagaa  
9661 aaatacaaat ttttcctagt gtttgcacct tagataaaca aggcaagcct aaaaatttag  
9721 ctacactttt aaataaaggc gcacatgctc tagagcttaa gagttcgtgt aatgcaaata  
9781 ttttgcgtgt aagtatgcaa tatgctctaa tgaaagaaaa aagtattttt gtaaaatggt  
9841 atgatgagaa ttttgacgac aatggtgtga tgaatgattg tgaatgagt tttgaattgg  
9901 gccttgccggg tatgagtgca gtagctgaaa gtagtgaagt ggctaagatc aaagaaatag  
9961 ctaaatttta tggcgttaaa gtgatttttg atttgctcag tcttaagcgt tctatagagc  
10021 ttttagagga cgaaaatcta aaacttatca gtatacacca tctaatacaa gatgataatg  
10081 catgcactgg atttaataca gcagcaaac tcaatccacc ttttaagaagc aaagaagata  
10141 aagaaagttt gaagcaggct ttaaaacaag gaaaaataga ctttttaagc tctttgcata  
10201 gtgcaaaatc catttcctta aaagatttgg cttttgatga agcagctttt ggaattcata  
10261 gcatatgtga atttatgagc ctttgttaca cttttcttat caaagaaggt cttttaactt  
10321 ggaaaaatct ttgcaaggta acaagtcaaa atccaagcga atttttgggt ttaaatagtg  
10381 gaataataga agttggaaag gaagcaaat tagttctttt tgatgaaagt gaagaaattt  
10441 ctgctccaaa aagttcactt tatgcaaat ataaactttt tggaaagggt aagcttcacc  
10501 ttataaaagg tgaaaatata atttcaact aagcttaaag tcctaagcct agtttaaatc  
10561 ctaaaaatac aagtgccgcc ataatcccag cagccggtaa agtgataatc caagctaggc  
10621 ctataggttt catcataatc caatttgcac ttttattata cacgccaata ctaaaaccg  
10681 caccgattaa aatgtgcgta gagcttactg gaattccaaa ttgtgttgct aaaagtatta  
10741 ctatacttgc tccaagttct gcactaaatc ctgtttagg gcgtatggaa gctagtttag  
10801 aacctacagt ggtaataact tctttgccta aaaaccaaag ccctacaacc aaggcaactc  
10861 caacatagc tagagcggca aaaggcacag gagaatttgc attgatagtg ccatttttaa  
10921 gaacatctaa gatcgcagca aaaggcccaa tagcattggc tatatcatta gctccatgag  
10981 agaaggcaa actagaagcg gtaaaaattt gaaaccaagc aaaaagtcta tcgggtggtt  
11041 tgtttaattc agttttttta acaatcttta ctatagcaaa agttacaata tagctaatag

11101 ttccaataat tcctataatc caaaaatfff gcaaaatatic taaagtgcata acattgttta  
11161 agcccttaaa taaaaacata gcagtgatga tagcagctcc aacgcaagcg ataataggca  
11221 tatgtgtttt taaaacagag tagatatcta tacttttttc tttttcttta aattctttga  
11281 tttgattttt ataaaagcta ttttcttgct cttcatcttc taaggctata gctgagagtt  
11341 cttaatttg ttcttcata cttttagttt taagatttaa aaaataatft tctttaaatt  
11401 tttttctatc tttttttaa ttttttagtt cttcgctaag tttttctgat ggtttgagta  
11461 tttttttgtc tatataggag tagataagat aagctacaag accaccgaag aggggtgaaa  
11521 taaccaaga tatagcaatc cttactatft cactccatft aacctggat aaggtttgag  
11581 atccatcaa ttttaaaagc cccatcataa tactagctcc aactataccg cctatgatac  
11641 tatgcgtagt agatacaggt aagcftttt ttgtggcgat aaaaatcaa gctccagagc  
11701 ttaaaagtgc tgctagcatg atggcaaaa aaagcatagg atcaaatgt tcaggaaata  
11761 taactattcc actgcgtatc gtttttagtca cttcagcgcc tgcaaaaatg gcaccgctga  
11821 gttcaaaaac agctgctatg atcaaaagctt gttttatggt tacagtttta gctcccacgc  
11881 tagtaccaaa agaatttgct acatcatttc cacctatggt aaatgccata aatattcaa  
11941 agatagaagc gagtataaag agtataagtt gatgttgaga gatataacca aatcccaaa  
12001 tgataaatgc aattacactg atagtaaaaa tgataaatgc gataagatta tctttttgca  
12061 taaaattaag ctttttttag cttgaattat acccttataa tcctgaatft gcaaatftta  
12121 cagctcttat cttttatagc tagtttttat ttattftaat tttttataat gaaaaataaa  
12181 taataatftt aggaaaagcg atgaaaagta ttttatatat acttatgctt tttttctctt  
12241 tgctaaatgc tgatgagcta gataatgcct taaaaataa tcaaaaccaa tggcaaaaat  
12301 ttaattatca agctgccaaa aaagcgccga caataaagga agaaaatatt gattfttaaaa  
12361 gtgctfttaa tggtatatta tccaatacat tggaaaataa aaatggtatt gataaaaccg  
12421 atggaaatft agatfttcaa aatgaaaatg tgcaaatfta aaatftaac tcgctfttatg  
12481 agaggagaa taattctttg ctttttcaa aagaatftta cgctacaaa gatagttata  
12541 attattcagg cggattgatt aatcgfttat aaaaagatga ttttttatft ggtataaatg  
12601 gcttcatcga tgggcaaaag gaacaaaag aaagcaaaag ctttgagct gaattgggtt  
12661 atcatcaatt tataaaagct tatagcaatt attatgfttc aaatgaagcg gatgaaaatt  
12721 tacaatttg aataagctft gctatcccat cttatagtgc ttttatctft gatataagta  
12781 aagatagtga gaaaataaat tatcaagtat cgtattcacc ttatagcgtt ttgagttta  
12841 aaatattacg ccgcatftt agtgcaaatg aagctattga tgatactgft ttgcaggtgg  
12901 gtttttagtt taatfttgat gaaagftfta tgaagcaact tagaaaaaaa gataatgcct  
12961 tgcaagaagt taatcgftat gacttcttg caaagagtgc ttaatgcata ccagcattat  
13021 ggaatftftc tggattatct agggcatagc ggaatftftc ccaatcaatt tgcttatccc  
13081 atattgctac gattaaggct gcaaccgaat ttccgcaaag atttccaacc gctctcattt  
13141 ctgacatgaa tttatcaaca cctaaaagaa ctctatagc agccacaggt aaaacttgftg  
13201 ctaaggttg atttgcctca gaaatftcca tattgcctaa agctgctagg gtacttcaa  
13261 gaacaataaa tcctgaacct gtaacaccta ctgcacctft tgaagctatc attaaagata  
13321 ttaaaatgct tatttcatga gctaagctta aatftacatt gaaagctftga gctaggaaaa  
13381 tcaaacatc ggctaggtat atattagtac aatcaagatt aaaactatat cctgftggca  
13441 aaacaagtcc gacagtagcc ttgaaaagac ctgctftftc aagftftctc atcaaaaggag  
13501 caaggcgaga ctgctagaa cttgttgcaa atactataag cacttctcta gaaataaagc  
13561 gcataaatft aaatatattg actftttgcaa aataacaaat caagcctaaa attcraaaaa  
13621 taaaaataag acaagaaca agcattacca ataataaata tgcaagattg atcaaaagagc  
13681 ctaagccgta ttgggctata agcaccgcca tagccgaaaa agcagcgact ggactaaaat  
13741 acatgatgac ttgtaaaatt ttaaatacaa agftttgaa tacctcaaga actctftgga  
13801 tggcttgct atcttctatt ctcatftaag aaataaata agctgtaata atagcaataa  
13861 ctaaacfttg catagftttg cttcagfta aaggagftat aatatccct ggcatagcat  
13921 cttgtagaat gtgcatgatc tctgaaactg cacttacttc agftgftftga gaaatatatt  
13981 tttgtacact tgcatgatca agftgftttg gatcaagatt cattccgca cccgfttgca  
14041 ttatgfttg cataaaaaa cctatagcaa gcgctaaggt gcttacaact tcaaaaataa  
14101 taactgctft agcacctata cttccaactt tfttaaggct ttcaaggcta atgatgccta  
14161 aaaccaaggt acaaaaaata ataggaccaa taagaactft taaggcgct atgaaataat  
14221 caactccagg tttgctcgct atagctatft cttgftftac atagccaagt ataatgctg  
14281 caataatacc tacaataacc caaaaacca aactftftaa catgctftta tataatggag



14341 gttttctttc tgcaaagggtt tgacttaaag tttccaaaat aactccttat aattccactt  
14401 ttagagatta agctaattct aaaagtttag caaaaaataa atagaacata gtttaaaaat  
14461 aattaaaata agtttttagt aaaactaatt ttttaaatcg tgttactaaa tttctcaatt  
14521 attatgattt tatttatctt aaaatatcat aatttattta tttatttttt attataaatg  
14581 ctttataata ttttgataat tactttaaga aaaaggaata taaaaaatta agattatgga  
14641 agaaatattc ttagcaaaag atgcccttat tacatctaaa acagatctta aaggaaatat  
14701 tatttatgct aataatgatt ttttaaaata tgcaggctat gaagttgatg aactcttggt  
14761 aaaatctcat aatatagtca ggcatgaaga tatgcctcgc actgttttta aatgtttatg  
14821 ggattatata caaagtggta aggaaatfff tgcttttgta aaaaataaag ctaaagacgg  
14881 aaggattat tggtttttg ctaatataac agcttctttt gataaacaag gcaatattat  
14941 aaattattat tcagtgcgac gtgctcctaa ccgcaaggct ttgccatta tagaagaaat  
15001 ttataaaatc ctacttgaaa aagaaaaaca aggcgggatt aaagcaggac ttcagactct  
15061 agatgatata gtaaattcac ataaaactca ttataatcat ctaattttta atctacaaaa  
15121 aaataactaa ttcaactata cttaataata aataatata aattgcgaaa ttttttaggt  
15181 aatataatatt acaaggtgtg aataaaattc ttaaaatata aaaacaaaag gaaatgcaat  
15241 atgaaaaata cgtttatatt ggctatffff atgggttttt taggtgtact tgggactgta  
15301 tttgttcatg cttatattgg agcagtaatt tttattttta ttattgcttt attggcttat  
15361 cttctgttat attataaaga tgagcaata atgatagata aattacacaa gctttgtaaa  
15421 gaattaaaag aaggaaatff tgataataga atagtgtata ttaagaccaa aagcaagaaa  
15481 ctagctgaaa ttgcagatga tcttaataat accatcgatg gtttagaggc ttacttaaga  
15541 gaaatcaata cttctatfff ttgttcgcaa aagggtgaat tttatcgcaa ggctttacct  
15601 gaaggcttaa aagggatttt tgcgcgcaat atagatttta ttaacaaagc cttagcaaat  
15661 atagaagtta ctgcaaaatc tacatftaaa aatgcattat caagaacttt aatggattta  
15721 agtcttggca atcaaaaata agatatgtct caaatttcag cttcctftaa ccaagatatt  
15781 agcgcgatga aacatgttta tgattcagtt gatagcatta ctcatgtagc tacggagaat  
15841 ggctctgagg ttgattcttt gcaaaatgct atggcgtctt taatggaagt ggtaaattct  
15901 agcaagaaa cagtgcaaac ctttgttgcc aattcgcaaa atattacctc tgtggtggaa  
15961 gttatacgcg atatagctga tcaaactaat ttgcttgcat taaatgctgc catagaagct  
16021 gctagggcag gtgagcatgg ccgtggtttt gcagttgttg cagatgaggt tagaaaatta  
16081 gctgaaagga cgcaaagatc tacaagtgag atttctattg ctattcaaac catgcaacaa  
16141 gattttgtta atattcaaag tggtagcgaa caagtattta atatagttag cgaatctgaa  
16201 gaaaggatta ataaattctc tgaagctfff aggggtctag aagaaaatag ctcgacattg  
16261 ggtaaaaatt ttggagcttt tgctaaaaga ttaattttat ctgttgftaa aatcgatcat  
16321 attttatata aatcaaatat ttatcttagt ctcaatggag ctcaaaaatt caatcttgca  
16381 agtacagatc ctatatcaaa tctttgttta gatgaaagag cgaaaaatgt gattaatgaa  
16441 cttgtatcag aatctgattt gattttggct aaagaattta ttcaagataa tgctcaaaag  
16501 gctataaaaag aagcaaatgt tgaatacatc gatcaaaaag tgtatgataa tattgtaagt  
16561 gatattaaag cgttagaaca aaaaagtgct gatatttttag ataagftaaa actfttaagga  
16621 aaaataaatg gcaaaagaaa tttttttaca agaggatagc ttaattactt caaagacgga  
16681 tftaaaaggg aaaatagfff acgcaaatga tgattfttta aaatagcagc gttatactat  
16741 ggcaagagta ttatataaac ctcatagcgt ggttagacat gaagatatgc ctcgtacagt  
16801 gtttaaatft ttatgggatt atataaaaga aggttaaggaa atftttgcct atgttaaaaa  
16861 taaaactaaa gataatgggt attattgggt ttttgctaat gtaacacctt ctatagatgc  
16921 aaataataat attattggat attattctgt gcgtcgtatg ccaataaaaa aagcgataga  
16981 tactatagaa aaactfttata gtgatttgct tagggctgaa aaagaaagta taaataaggg  
17041 tgtagaattg ctgaatgatt tttgcaaaaa tgctggaaaa agctataatg aattgattft  
17101 tftctftaca gaatccaagt aaaaaaaggc ttaaaagcag tftgtftftaa gcctagatat  
17161 tatataatct ttcgctftta atftaattftc tagggftaat tatgtftgat attattgtca  
17221 taggtgggtg ccatgctgga attgaagcaa gtgctgcttc cgctagaatg ggcaaaaaaa  
17281 cattgctftt aactacactt atagagcaaa ttgggtgcagc gagttgtaat cctgcaatag  
17341 gtggacttgc gaagggtcat ctcgtaaaag agattgatgc tatgggtggt ttgatgggtg  
17401 aaattacgga tatagcgggg atacaattft gcattftftaa tgaaagcaag ggcgttgca  
17461 tacgaggaag tagggcacia attgatatgg ataaataccg tatcgttgca cgcaacaagc  
17521 tfttaaaact taagaattta gaaattftct aagaacaagt atgcgaattg atfttatgaaa

17581 atgatagcgt tgtgggagtt aaaaccaacc tgcaaaatag ctataaagca aaaaagggtga  
17641 tcttaaccac ggggtactttt ttaaattggac ttattcatat aggtgaaaat aagcttacag  
17701 cgggcagagt gggcgaactt gcttctgtga aattgggtca gaatttactg agtactaatt  
17761 taaaaatggg tagattaanaa acaggaactt gcccaagggt agatgctaag agtattgatt  
17821 ttgatgtatt agaaattcaa tatgggtgata aaaatcctaa ggcttttagc tttagaacaa  
17881 aaaatthtaa tcctaaacaa cttccttggt atattgcaag aacaaattha aatactcatg  
17941 agattattaa aaacaattht taccgagcac cgctthttac aggacaaatt gaggggatag  
18001 gcccaagata ttgtccttct attgaagata agattaatcg ttttagcgag aaagaaagcc  
18061 accatctttt catagagcca caaactattg atgcaacaga atattatatac aatggthttt  
18121 caactctttt accttatgaa gtccaaattc aaatgthtgcg ctcggtaaaa ggtthttgag  
18181 aggctaaaaat tacacgcttt ggthtatgcta tagaatatga ttacatagaa ccaacagagc  
18241 tttatcatac tctagaaact aaaaagatta aaaatcttha ttgtgcagga caaattaatg  
18301 gtactacagg atatgaagaa gctgcagctc aaggthttat ggcaggagtg aatgctgttt  
18361 tagctthtga caataaagaa cthttcattt tgcgtagaga tgaggcttat atcggcgttt  
18421 tgattgatga tctagthtatt aaaggtacaa aagagcttha tagaatgtht acttcaaggg  
18481 ctgaatttag actgctthta agggaagaaa atgccatcgt aagacttga aaatatggca  
18541 aagaattggg gctthttagaa gatgagtht atcagthttat agaaaatatt cgtthtaata  
18601 ctcaaaaagg acttgaactg cthcttgaaa aagaattht tccaaatact gaaaataaca  
18661 cthttthtagc aagtatagga gaggaaaaaa ttacctccat agthaattht caaaaaattht  
18721 ttgcaagatc gagthttgat atagaaaagc taaaaaaatt aatgthgatt tthgaaaata  
18781 tggatgagta thctthtaaga gaaatthtaa acgaggctaa atattacctat tatatcgcta  
18841 tgcaaaaatc gcaagthgaa aaaatgaaaa atthaatthg tatgaaaatt ccaagthgatt  
18901 thgatttht acgthttht aagthttht ggatthttht atgagthttht agaaaagctha caaaaaacata  
18961 agctthttht actthttht gcgagcgaga thcagthttht caccctgca gctthtagata  
19021 thctthttht thtthttht atgcaaaaaga aaaaagctha atgctthttht gcgthtthttht  
19081 thtthttht thtthttht thtthttht cccatggaat thgctthttht ggtthgattgct  
19141 thtthttht gctthttht thtthttht taagctggtt aatthtagagg acgctthttht  
19201 thtthttht thtthttht atagthttht aactctthttht ggtthttht thtthttht  
19261 thtthttht gthtthttht thtthttht thtthttht thtthttht thtthttht thtthttht  
19321 thtthttht thtthttht thtthttht thtthttht thtthttht thtthttht thtthttht  
19381 thtthttht thtthttht thtthttht thtthttht thtthttht thtthttht thtthttht  
19441 thtthttht thtthttht thtthttht thtthttht thtthttht thtthttht thtthttht  
19501 thtthttht thtthttht thtthttht thtthttht thtthttht thtthttht thtthttht  
19561 thtthttht thtthttht thtthttht thtthttht thtthttht thtthttht thtthttht  
19621 thtthttht thtthttht thtthttht thtthttht thtthttht thtthttht thtthttht  
19681 thtthttht thtthttht thtthttht thtthttht thtthttht thtthttht thtthttht  
19741 thtthttht thtthttht thtthttht thtthttht thtthttht thtthttht thtthttht  
19801 thtthttht thtthttht thtthttht thtthttht thtthttht thtthttht thtthttht  
19861 thtthttht thtthttht thtthttht thtthttht thtthttht thtthttht thtthttht  
19921 thtthttht thtthttht thtthttht thtthttht thtthttht thtthttht thtthttht  
19981 thtthttht thtthttht thtthttht thtthttht thtthttht thtthttht thtthttht  
20041 thtthttht thtthttht thtthttht thtthttht thtthttht thtthttht thtthttht  
20101 thtthttht thtthttht thtthttht thtthttht thtthttht thtthttht thtthttht  
20161 thtthttht thtthttht thtthttht thtthttht thtthttht thtthttht thtthttht  
20221 thtthttht thtthttht thtthttht thtthttht thtthttht thtthttht thtthttht  
20281 thtthttht thtthttht thtthttht thtthttht thtthttht thtthttht thtthttht  
20341 thtthttht thtthttht thtthttht thtthttht thtthttht thtthttht thtthttht  
20401 thtthttht thtthttht thtthttht thtthttht thtthttht thtthttht thtthttht  
20461 thtthttht thtthttht thtthttht thtthttht thtthttht thtthttht thtthttht  
20521 thtthttht thtthttht thtthttht thtthttht thtthttht thtthttht thtthttht  
20581 thtthttht thtthttht thtthttht thtthttht thtthttht thtthttht thtthttht  
20641 thtthttht thtthttht thtthttht thtthttht thtthttht thtthttht thtthttht  
20701 thtthttht thtthttht thtthttht thtthttht thtthttht thtthttht thtthttht  
20761 thtthttht thtthttht thtthttht thtthttht thtthttht thtthttht thtthttht

20821 tccaagacct cttgatatac ctccttttaa aatagatgga accaaacttg ttctaggtga  
20881 agaaggtcca gaatacaaaa aatgacgga ggaagcttaa tatggcgcac attagaaagg  
20941 ctaatgggct agtggattgg cttgatcaaa gactagcagt acataaatta cttgatgttt  
21001 taatggtaaa atattggatt ccaaagcaaa tcaatcttct ttgggcaatg ggagttattt  
21061 taactactct ttttactgtg ctttttatta cagggctttt gcttgttatg tattataagc  
21121 ctgatactgc tcttgctttt gatagtgtaa ataaaactat catgcaggaa gtggaatatg  
21181 gttggctttg gcgtcatatg cacggtgttg ccgcttcggt tatcttctta attatctata  
21241 ttcatatgct aacaggaatt tattatggct cttataagcg tggtagagag atgatttggg  
21301 taagcgggat gctacttttt gtagtattct ctgccgaagc ttttagtgga tatatgcttc  
21361 cttggggaca aatgagttat tgggcagctc aagttattac taatcttttt ggtggaattc  
21421 cacttattgg acctgagctt gttatttggg ttcgtggtga ttatgcagtt tctgatccaa  
21481 ctttgacaag attttttatg cttcatgtat gtttacttcc tatagtaatc attgctatca  
21541 tagcatttca cttttattcc ttaagaattc ctcatgtaaa taatgaaatc gctgaagaat  
21601 tagactttga tttagaagct gaaaaatata tggcaggcga tacaaaaggt tctaaagtaa  
21661 ttcctttttg gccaggattt ttatctaaag acttcatgta ttttgtctt tttatgattt  
21721 tctttttcta tttggatgct ttttaagttg gttttgcaat ggatcctatc aactttgatc  
21781 cagctaagtc acttaaaact ccagcacata tttatcctga gtggtatttc ttgtggagtt  
21841 atgaagtttt aagaggattt ttctttgata ttgcaggat taaagctttt gatataggtt  
21901 tggctgcttt tggatttgc caagttattt tcttcttgct tccttggtt gatagaagtg  
21961 atgtggttaa acctgctcac gaacgacctt tttttttat ttggttttgg gtattgctta  
22021 tagactcat cgttttaact atttatggaa aattacctc aacagggtga aatgcttggg  
22081 ttggttttta tgcttctata atatttttac ttttatttat agtcgtttta cctgtaataa  
22141 ctatcatgga aagaaaagga gctaagtaat gagagaacta aaaatatttt tagtagtagt  
22201 agtttttact gctcttgttt attggggagt tgagccttat gcgcactctg taatgaaacc  
22261 ccatgttgct cctgctaatt ttgattatgc agcagaagat acagcttatg ctaaaggat  
22321 catagcagaa aaagaaatag ctttagaaga tgcgaaaaaa tcaaatgatg caaaaagaat  
22381 agaaagtgct caaaaagatc tagataaggc taaagaaaat ttagctaaag tagaagagct  
22441 ttgggcagat gttgcaaaaa ttgattttac taaaggaaac gccgcaaaag gcaaggagtt  
22501 ctttaataat aattgttttg catgtcatgg cgtaaagaa gatgatatag cagcaaatat  
22561 tacagattct tctttgggtg taatcccacc tgatcttagt tcagcagggtg ttatttttga  
22621 tgagaaatth ttagccgctt tgatcatgaa tcctgctctt gctttaaaag tagatcataa  
22681 atttggcgat gcttttatca tgactgctta caatagttaa acttcaggag atagtgaaga  
22741 gcttgtaaht gcaaatatag ctgatgttat tgcttattta aaagaagtag gtgttaaatt  
22801 tgaagctaaa gaaaatgcta caattaaaca agaggcagag cttaaatact caaaaattga  
22861 agatgctaht gagaaatcag ctttggttga aaaagaaatt gcttttgcta aagataaaag  
22921 tacttttata gaagcctgcg gtcgttgcca tgatgttaag tatgataatt tctttacccc  
22981 atctahtcat aatgacttgg caaattattt aggttcagtt ccacctgatc tttctatgat  
23041 gattagatct cgcggagagc aatacttgca tgattttatc aacaatactc aaaaacttct  
23101 tccaggaact gctatgcaa gagtaggtct aacagaagat gcacaagcta aagttgtttc  
23161 ttatcttgaa aaagtgggtg atagcaaaaa agaagaaaga gaaagcatag gaatttatgt  
23221 aatgatattc tttgtaattc taagtatttt tgctataggc tgggaagcgtt ctgtttggtc  
23281 taaactacat taatattata aaatttttgc cactatttta tatctgtggc aaaaattcta  
23341 tcttttcttc gattttatta aattttaaac ctaattaaga gatactatca aataataatt  
23401 tttattaatt ggagtatatc atgcttgaah aacaaatgat taaatttatt ctttcaaat  
23461 ggaattatgg aaattttaga attgtatttt gggaccaaga agaatttcat gtgggtaatc  
23521 agcctgctaa attttcttta attttcaaag aaaaaatacc ttttttaaaa ttatttagtg  
23581 atacgagttt agtttttgca aaacactata tggagtctaa actagaaatt gaaggtgatt  
23641 atgatgaaht agctaaagtt ttgtattatt tttcaataa gcgtttttta aaaaatacag  
23701 aggatattc gagtaaaata gcccaaaaac aggaaagtaa aatatcaaa agtcattatg  
23761 atataggtaa tgatttttat aaactttggc ttgatgatac aatgagttat tcttgtgctt  
23821 attttaagac ttctagcgat actctttatg aagctcaaat caataaaata gagcataccc  
23881 ttaaaaagct tgatttaaaa cctahtgaaa agctttttaga tataggttgt ggttgggggtt  
23941 ggctttctat tatagcggca caaaaathtg gagttaaaggt tgttggaaht actatttcag  
24001 aagaacaatg caagaaagcc caagaaagag taaaagagtt taagcttgag gatagagtag

24061 agataagact tcaaaactat caagatttgg aatttgagga ttattttgat aaagttgttt  
24121 cagtgggaat gtttgaacat gtaggcaaag aaaatttagg actttatttt atgaaagcaa  
24181 aacaagtatt aaaaccagga ggttctatgc ttttgcattc aattttggca atgtttgaag  
24241 gaaaaactaa tgcttggata gataaatata tttttccagg aggctatttg ccatcattaa  
24301 gagaggttgt aagtgctatg agtgaatggg attttcacct tcttttagca gaaagcttga  
24361 gaatacacta tgcaaaaact ttagatatgt ggagtaataa ttttaataca gtattgcctc  
24421 aagtaagaaa aaaatatgat gaagaattta taagaatgtg ggatttatat cttcgctctt  
24481 gtgcttctgc gtttcgctt ggaagtgtag atttgtttca atttttaatt acaaaaagaaa  
24541 tcaataataa tcttagtctt actaaagagt atatttataa gtaaatacta aacttaaatt  
24601 tgataaaatc ttagcttcat ttcgcacgca tcaattcctt ttagcttgtt ttatagattg  
24661 agggatgctg aggaataaag ctaaattata aggagaaact catggttagt atgagagatt  
24721 tattggaatg tgggtgacat tttggacatc aaacaagacg ctggaatcca aaaatgaaaa  
24781 aatttatttt tgggtgagaga aaaggtattt atgtaataga cttacaaaaa actttgagat  
24841 attttagata tacttacaat atcgttcgcg atgccgctgc tgaaggaaaa actatacttt  
24901 ttgttggtag aaaaaagcaa gctgggtggag cgattaaaga atacgctgaa aaatgctgta  
24961 tgccttatgt aaatcataga tggttaggcg gtatgatgac aaattttggga actattcgc  
25021 aatcaattag aaaattagaa gttattgaaa aaatggaaga agatggaagt attaaacttt  
25081 taactaaaaa agaagcttta atgcttacga gaaaaaaga gaaattattg gcttatcttg  
25141 gtggaattcg ttatatgaaa acacaaccg atatgatttt cgttatagat acagtgaaag  
25201 aaaaaattgc agttcaagaa gcaaatagat taaaaattc tgtagtagct cactagata  
25261 caaactgca tcctgatctt gtaacttatc ctatcccagg aaatgatgat gcaattcgtt  
25321 cagttcaact tttttgcaa gaaatggctg aagctatcaa tgaaggaaaa gcattaagag  
25381 aacaagatgg tgaagcttta ccaagtgaag aaaaagaaat cacagaagaa gagaaaaaag  
25441 aagttttaga cgaagcaatg agcgaagaag attttaattg ggagcaagaa taatggctga  
25501 aattactgct gcaatggtaa aagaactccg cgaaagcaca ggtgctgggga tgatggattg  
25561 taaaaatgct ttaagtgaaa caaatggaga ctttgacaaa gcagttcaac ttttaagaga  
25621 aaagggttt ggtaaagccg ctaagaaagc tgatagactt gctgctgaag gtttggtaag  
25681 tgtaaagta agtgatgatt ttacaagtgc aacggtaagt gaaattaatt cagaaacaga  
25741 ttttgtggct aaaaatgatc aatttatcgc gttaacaaaa gatagcagag cacatataca  
25801 aaataatagc ctacaaagtg ttgaagaact tcattctagc acaatcaatg gcgtaaaatt  
25861 tgaagaatat ttaaaaagtc aaattgcaac tatcgggtgaa aacttagttg taagaagatt  
25921 tgctagttta aaagcaggtg caaatgggtg agtaaattggg tatatccata ccaatggctg  
25981 tgtgggtgtt atcatcgtg cagcttgtga taatgctgaa gtggcaataa aatcaagaga  
26041 tttcttaaaa caactttgca tgcatatagc tgctatgaag ccaagctatt taagctatga  
26101 agatttggat gtggaatttg tagaaaatga atataaagct ttagtcgcag agcttgaaaa  
26161 agaaaatgaa gaaagacgca gacttaaaga tccaaacaaa ccagagcata aaattcctaa  
26221 atttgcaagc cgtaaacagc tcagcgtatg aatcttaaaa gaagctgaag aaaatataaa  
26281 agaagagctt aaggctcaag gcaaactga gaaaatttgg gacaatatta tccctggtaa  
26341 aatgaatagt tttatagcgg ataattctca acttgatagc aaacttactt taatgggtca  
26401 attttatgta atggatgata aaaaaactat tgaacaagtg attgctgaaa aagaaaaaga  
26461 attaggcggg aaaaatcaaaa tagttgaatt cattcgtttc gaagtaggag aaggtttaga  
26521 aaagaaaacc gaagattttg ctgctgaagt tgctgcacag ctttaaagta ttaaaatgga  
26581 attattaaga gcggaaaatt taggtcatag ctttgattat cgcctctttg aaaatttaaa  
26641 tttttcttta aataaaaaag attgtattgc tatacaaggc agtagtggct gcggaaaatc  
26701 cactctttta catataatth cttctttatt aaagccaaat aagggcgaag ttttttttaa  
26761 gggcctaaaat ctttacaaga taagtgaaaa tgaagactg aaaattcgtc gttatgactt  
26821 gggcattatt tttcaaaccc attatctttt taaaggtttt tcagcttttag aaaatataga  
26881 acttgctagt gttttatcaa accaagattt agatgaaaaa atcttaaaaa aactagggtat  
26941 tcatgagctt ttgaaacaaa aatataggtaa attaagcggg ggtcagcaac aacgcgtaag  
27001 catagctaga gtgctttgca aaaaaccaa aattattttt gctgatgagg ctacgggaaa  
27061 tttggatttt gataatgcta aaaatgttat agagcttttg gtttcttatg ccaaagaaaa  
27121 tgatgccgct ttattttttg ttactcatga ttctaaactt gctcaatttt gtgataagac  
27181 ttatatttta aataactaat gaatttgtta attatttagg agataaaaaat gtagccacct  
27241 ttatgttgct ctttgctaga atgagtgagc ttatagtatt ttttcccttt ttttctcata

27301 attctatccc tataattatc aaaacgactt ttgcattatt ttttaacaatg tattttatttc  
27361 ctttggcaaa acttgaaatt ttacatttag atagtttttt tattatacag cttttaagtg  
27421 aaattgtttt tggaatgata gctgggctta tgttgcagat ttttttgct attatcatga  
27481 tggcgggtga gcagatagct tttactatgg gatttactat ggctagtgtt ttagatccaa  
27541 gttctggaac aaatatgcct attacttcac aaattttaca tttgattgct ttgttatttt  
27601 ttcttgcat tgatggcat catttaatgc ttctattttt aagtcattct ttgggttata  
27661 ttagtcttgg tggtttttat cctcatgaaa atttaatgca ttatctaaat atgggaatgt  
27721 taaatatttt tattataggt tttacgatga gttttccaat acttggaaatt tctcttttgg  
27781 cagatactat ttttgggctt ttaatgaaaa ctatgccgca atttaatctt ttggtaattg  
27841 gttatcctat taagatagct ttaggattta tagtgtaat agctatttta cttgtaatga  
27901 tgcaatattt taaagatttg attttggagg tttttactca tatgcaaact ctatttttcg  
27961 cctaagcaaa ggataaatga aaatgttata gaatagcaat ttttttaag gattaaagtg  
28021 atgaaaattt tacttttgaa tgaaaaccct gttgtatcaa gacttataag cttgagtgcg  
28081 aaaaaaatgt cttatgattt tgaggaagt aatgcctatg atgaaaattt aggtcattat  
28141 gatgcaatta tagtcgacag tgatacgct gctccttga aaattcttaa agaaaaatgc  
28201 gataaactaa ttttttagc cccgcgtaat caaagcgtgg atgttgatgc ttttaattta  
28261 cataaacctat ttttgcctac agacttttta aatttgtaa atcaagaaaa tcttaaaatc  
28321 gaggatgacg ctattttacc aatcgaagaa gctgaaaatc cttatgctaa tatcagttta  
28381 gatttagatg atttaaatat agatgatttg cctgatgaaa aaactgaaga tatacaagaa  
28441 aatgagctct ctatggaaga aaatttagaa tctttagctc tagatgatat aaaagaggat  
28501 gcaagagctc atgaaaatac cgataaagag ttaaatttag atgacttaag tcttgatgaa  
28561 gagcaagaaa agaatacac atcagaagct acagtgaatc atttagaaga aaaaaatgaa  
28621 gatcaagaat ctttagaagt attatctcaa gatgatattt tagatgataa aattagttaa  
28681 gaagattcta aaaaccaaga gcaagatttt gaagatcaa atgaaattca agataaaata  
28741 gaagatattc aagagcttga agaacaacc gataaattag acaaagattt attaaaagat  
28801 agtgaatttg atgaaggtca agaagtaaat gcaaatgatg ctttggatat aaaagaagaa  
28861 acaaaaattg aagcattaga gaaagaggaa agtcttgata aaattcaatc acaagatttt  
28921 atcactgatg attttcctat cgttgaagaa caagaaacaa aagttgattt tgatgatatt  
28981 ccagaagatg ctgaattttt aggacaaaca aaagaagagg atgaggctgt agaggatttc  
29041 ttgcctgttg tagaagatca agaaaattta gatgagcatg atgaatttga agagatgagt  
29101 aatttaagca ctcaagatca aattaaagaa gagttagcac aacttgatga acttgaatat  
29161 gatattgaca gtgatgacag tattaagtt ttagaggatt ttaaagaaga gcctatttta  
29221 gatgacaaag atttaccaat taatgatgag gaaatcgttg ttccaaaatt agaaattaac  
29281 gattttgata gtttaaaaga aagcgatata caagaagcct taggtgaaga aatatctact  
29341 ttagaagata ataaaagtga gaaattaaac accaaagaag atcaactagc aaatgaagca  
29401 ggtgaagaaa ttgttaatga attgagtcaa agtatagcag gggctatcac ttcaagcatt  
29461 aaagatgata ctttaaaagc agcacttaag ggtatgaata tgaatataaa tattagcatt  
29521 agttttaacg aggataaaaa ttgagtgcct ttatattatt ggtttcaggg ccaagcggag  
29581 caggaaaatc tactctttta aaaagacttt ttgatgaatt tcaagaagaa ctttattttt  
29641 ctatttcttc aacaacacgc ttgccaagag aaggtgagca acatgggggtg gattattatt  
29701 ttatcacaca tgatgaattt caacaaggta tagataaaga gcagttttta gaatgggcta  
29761 aagtgcataa aaatttttat ggcacttcgc ttgagcatac acaaaatgct ttaaattgatg  
29821 gcaaaatagt tgtttttgat atagatgtgc aaggttttaa gatagctaaa gagaaaatgg  
29881 ctgaaaaaat catttctggt tttatcacta caaaaaataa agatgaatta aaaaaagac  
29941 ttattaagcg aaatactgat acaatattgc aactagagaa aagattgcaa aatgcgagtg  
30001 atgaaatgaa agagcttaac gagtatgatt atttgatcat taacgataag ctagaggaaa  
30061 gttacgaagc cttaagagca attttaatcg ccataagtt taagactaaa gggcaaaatc  
30121 tagagcaaat tcaaaatatt tggaataaag gagaataaaa tgggtggttg gtcaagtcca  
30181 agtcattggt taattatttt attaattggt gtattacttt ttggagctaa aaagataccg  
30241 gagcttgcga aaggcttggg taaaggtatt aagactttta aagatgaaat gagcaatgaa  
30301 gatgaagcag caaaaaatgc aaatgcacat aaaatcgaag aaaagcaaaa tacaaccaat  
30361 catacaagca ctgatgcaaa tatagatgaa gtaaaaaaat ctttaaggctt agtttttgaa  
30421 aaatattatt ttttaatgagg ttaaaaaaat ttttagagtgt gattttgcac ttgaaaatcc  
30481 aaaggataaa aatctagctc actttgccac tcttttggct ttttctttgg ctaaagaatt

30541 aaaaaaatca cctattgcta tagcaaatga tctagctgct aaatttcaag agcatagcta  
30601 ttttgataag gttgaagcac tcaatgggta tttgaatttt agattatcaa aaaccttttt  
30661 aatgatctt gcaacaaag ctttacaana tccaaatgaa ttctccaaag gagagggtaa  
30721 aactgaaagt tttttacttg aatatgtcag cgccaatcct acaggtcctt tgcataatagg  
30781 gcatgcaagg ggcgcggttt ttggcgatac ttttagcgcg gttgcaaaac atttagggtta  
30841 taaatttgac accgaatatt atgtcaatga tgcgggtaat caaatttatt tactaggact  
30901 ttctattttc ttaaataatca aagaaagtat tttaaaacaa gaagtggaat atcctgagca  
30961 gtattacaag ggtgattata ttatagatct tgcaaaagaa gcttatgaac actttcctca  
31021 agattttttt actgaagaaa atatccctgc ttttagcggat tgggctaaag ataaaatgct  
31081 tattttgatt aaggataatt taagtcaagc aatatttcaa atcgatactt atgctagtga  
31141 aagatcttat tatgggtgctt tgggaagcaac gctatcagct ttaaaggagc atggagggtg  
31201 ttacgaacaa gagggtaaaa tttggcttgc ttcatcttta aaaggagatg aaaaagatcg  
31261 tgttattatc cgtgaagatg gtcgtgggac ttatttggca gcagatatag tttatcataa  
31321 ggataaaatg agcaggggtt atgataaatg tatcaatatt tggggagcag atcatcatgg  
31381 ctatatactc agaatgaaag ccgctatgga attttttaggc tttaaagctg atgatcttga  
31441 aattatctta gcacaaatgg tttctttgct taaaaatgga gagccttata agatgagtaa  
31501 aagggctgga aattttatct taatgagtga tgtggtagaa gagataggaa gcgatgcatt  
31561 gcgttatatc tttttgagta aaaaatgcga caccattta gaatttgata taagtgactt  
31621 gcaaaaagaa gataattcta accctgtttt ttatattaat tatgctcacg ctagaattca  
31681 tcaagttttt ggcaaagcgg gtaaaaaaat cgatgatgtg attgatgcgg atttgcaaag  
31741 tctaaatcaa gatggagtaa atttgctttt tgaagcttta aattttaaag ctgttttaat  
31801 cgatgctttt gaggcgcgtg ctttgcaaaa aattcctgat tatcttaaaa atttagctgc  
31861 tagtttccat aagttttaca atgaaaacaa agttgtaggc tctgttaatg aaaatgattt  
31921 attaaaactc tttgctttgg ttgcacttag tattaagaca gcttttgctt taatgggaat  
31981 tgaagctaag aataaaatgg aacattaaaa cagtattttt actgttttaa tgattgagta  
32041 aaaatactgc tataattacg ataacaatac ctaaaattcc tattttgttt aatttttctc  
32101 tatataaaat ccaccacca agacaagttc ctatgattcc tatagcacc caagttgagt  
32161 aagctatgct tagcgggaaca tattttaaag aaaaagaaag tagaaaaaag gccagtatag  
32221 cactgatgat tgcagctata cccaagatt tatgtctaaa accatcagat ttttttaata  
32281 ataaattcgc aacgatgtct aagaatgctg ataaaattat aattgctata tacatttatt  
32341 cttaaacctc gcctatattg attaggatga tcccgatgat agaaagagca atgcctagca  
32401 tttgagtcga agttaagctt tctttaaaaa gtataaaaaga aactaaaagt ataagaataa  
32461 taccaaaag ctcccacag gcataagcaa ttcctacttg aattttttta atcgcttttc  
32521 ccataaagaa ataagaaaaa gctataaaaa tagccataaa accataggct aaaatgggat  
32581 tatccatttt taaaaaactt gtacccaaaa cttcaaaaac aattgcgcta ataagaaaga  
32641 accaggctat aaagagttct ttttttatta aattcaagaa agccctccta aaaataaatg  
32701 gcaaaatcat atcatttaaa gctttaatta gcctttttat tttatacttt taactttaga  
32761 aatcttaaag aaagtgagaa ttgatgggac gagcatttga ataccgaaga gcatctaagg  
32821 aagctagatg ggataaaatg agcaagcttt ttcctaaact tgccaaagct atacaagtag  
32881 ccgcaaaga gggtaggact gatcctgata tgaatcctaa gctaagaagt gctatagcta  
32941 ctgctaaggc aaataatag ccaaaagata atatcgatgc agcgataaaa agagccagtg  
33001 gtaaggacag tgctgatatt aaaaatatcc attacgaagg aaaggctgct cacggggctt  
33061 tgggtgatagt agaattgatg acggataatc ctacgcgtac ggtagccaat gtaaaagcta  
33121 tttttagcaa aaatggcgga gaggttttgc aaaacggttc tttgggtttt atgtttgcaa  
33181 gaaaagcagt tttccatctt gagaaatttg atggagattt ggaagaatta gagcttgagt  
33241 taatcgatgc aggacttgaa gaactagagc aaaatgaaga agaattagta attagtggag  
33301 attatacagc ttttggcgag cttagtaccg ctatagaagc taagggttta gttcttaaaa  
33361 aagcaggact tgaatatata gccataatc cagtaagttt tagtgaagag caacttggag  
33421 atatagaaaa acttttagat aaacttgaag atgatgatga tgttcaagct gtttatacga  
33481 atatagaata aggagaaaaa atgttaaaaa caattgatac aagtaagggt aatgagtata  
33541 aatttgcctt tgtggaaact gaaaaaggta caatgaaatt agaacttttt ggtgatgaag  
33601 ctccacaaac tgtttgtaat tttgcaaatt tggcaaatga gggtttttat aaggatttaa  
33661 attttcatcg tgtgattcca aattttgtga ttcaaggagg ctgccacac ggtaatggta  
33721 taggtgggac tggatatgag attattttgtg agtgtgatga tcaagcacac aagcaccaac

33781 gcgggacttt atctatggca catgcaggac gcgatacagg aggatctcaa tttttcattt  
33841 gccacagtcc acagcctcat ttagatggag ttcacactgt ttttggacaa attaatcctg  
33901 aagataaaga aagtttagaa gtgttagatt ctattcgtca ggggtgataaa atcatcgata  
33961 ttaaaatctg tgataaaatt taatttacat taatttttta tcttacctat aaagctagtc  
34021 ttttattaga ctagctaaga tagtttctat ataaatctta gttagaaagt atggttttaa  
34081 atacttgctt taatttgctt aattttttaa gttacaattt tgaaaatttt tcttctataa  
34141 ggctaatatg caagaaatca ttcattttat catcgaaact gctagtgatt ggggatattt  
34201 aggtattggt attttaatga ctttagaaaag ttgttttata ctttttcaa gtgaaatcgt  
34261 gatgattcca gcaggatatt tagcacataa ggggtgagctt gatataattt tttgtatatt  
34321 aagtgggggt ttaggctctg ttttaggggc tttgattaat tattatattt gcttttttg  
34381 gggtaaaaaa ttcgtactta gatggggtaa atattttggt atcaatgagg ccaaatttgc  
34441 aaaatttgaa gatttcttta ataaacatgg agaattttcc acctttactt gtaggctttt  
34501 gccaggaatt cgtcagtata tttccatgcc tgcaggtttg gttaaaatga aacttgttaa  
34561 ttttgtgctt tttactgcac taggtagtgc tatttgggta agtatacttg catttttggg  
34621 ttattatata ggagaaaatg aagagctgat taaagcttat ctgactcaaa ttcttattgt  
34681 tatagttatt tttataatth tggcaagttt aatttatata aaaataaaaa agccttttgc  
34741 taaaaaggct taaattttat cgcttacact ttgtatagca tttttaattt gcagttttga  
34801 attttctagc ttcgtttttt ctctttcatt aaaatctagt tcaaagattt tttctactcc  
34861 attttttct atgatagcag gcaatgaaaa tgctaaatca tcaaaaacca cacttacagg  
34921 atgcaagctt tttctatctt ctaaaacagc ttttagctaaa tttgcacaag aggttcctat  
34981 gccaaattcg gttcttcctt tgcgtttgta gataaaatac ccctcatcaa caactgcttt  
35041 ttcgatattt tctatatcta attttttgcc catcttatcg caaaatgta gtaaattttg  
35101 ccctaaaacg ctagcagtag aaaggcggc aaattgcaa tccccatggt ctctatcat  
35161 ataagcggtg atatctttgg gattaagatt taaatctttg gctagaattt ttttaagcct  
35221 agagctatca agattggctt cacttccaaa aacatgggtt ttaggtaaag agcttagaat  
35281 ttgagtatag taagtaattg tatcgtttgg attagtagca acgatatatt tacccttaa  
35341 atttgcatgt tttaaactca aaacaatatc cttaagctcg gtaatattgt tttgaagctc  
35401 aaccaaacga ctcggtaatt cttttaaatt ttcttttcta aaagctagga tgataatatt  
35461 gcaatttgct agtttttcta aattttagtc atgaattatt ctgtataag aagaatgaat  
35521 cgcagacata tcttctaaat ctcttgcgtg tgctaaggct aaatcttgtt tgatatcata  
35581 taaataaagc tcggagcaaa tttttgcac aacaatatta taagcacttg ctgcacctac  
35641 aaaacctaaa cccacaatac cgatttttga cattttatct cttttgcttt gaaattctgt  
35701 tataattata taaaattgat ttaaagaaac tataaatatg caaaagcctg atattcaaag  
35761 ttttaacaaat tttctaactg actatacga aacactccta agtgcgggaa cttacacggc  
35821 tagagttgct aaatgcgtgg gcaggatagc tcaagtttat ggatatgaga taaatattaa  
35881 tttctttttt catcatatca ctttaaatat ttagatattt gaagataatt ccatacaaag  
35941 aacttatgta ataccaaatc atcatgcaca tatcaatttt aagcttattt ttgaattaag  
36001 tgctttaagt tgggctatat atgatcataa atacgaactt gaaaaagcaa aattagcttt  
36061 taatactata agcattcaaa aaaaacattc ttatatctta aatcttttat ttgtttctat  
36121 agctaattca ggcttttcta ggctttttgg tggggatttt ggtgcaggag ttttggattt  
36181 ttttgcgact ttttgggac tgcttttaag atttgccctt actaagggtg aaatagattt  
36241 aagaattcaa tacattcttt gttcttttgt ttcttcttgg tttgtatttt tgggcttggg  
36301 tatgggatat acaataactt cagatgcagc acttggttct agtattttat atcttatacc  
36361 aggggtattt tttatcaatt ctataatcga tatattaaaa gatcatattt taatgggttt  
36421 gagtcgtatt atcagcgtag ctattttaat ttgttgcatt gctcttggaa tttatatgac  
36481 tcttagtatt tcaaaatttg ggattttgca atgattgaat ttatcttaaa agatatgttt  
36541 tttgctgcta tggctgggtt tggttttgca tatgcttga atcctccttt aaaaactctt  
36601 attttatctg cacttttggc agctattgct catggacttc gttttacttt gatagaatat  
36661 tttcattttg aaaccttagc aattgcaacc tttatagctt ctttttgcgt gggttgcttg  
36721 ggtattgctt tggctaagat tattaact cctgctgaag ttattgcttt tcttgcgctt  
36781 attcctatga taccaggtat ttatgcttat aaggctattt tataccttat ctctttcata  
36841 cgcagtgatg atttaaaggc taagtctgaa tttttggtac aattttttga ttattttttt  
36901 acgacacttt cggttaactt ggcttttagc ataggagtga gcgttacttt gcttatattt  
36961 tttgaacaga gttttatgat gacaaggcat gctaaaaagc attgattttt gtttaatttt

37021 tcttattata attttgaana ttttataaaa aaggaaaaat atatgtttatg tcctgtttgt  
37081 aatgttgatt tagtaatgag cgatagaagt ggggttgaga ttgattattg tccaaaatgt  
37141 cgtggcgttt ggcttgatcg cggagaactc gataaaatca tagaacgcag cactcctaac  
37201 acagcaagtt ttaatcaagc tccaagacaa gaacctagat acaacgatca ttcttatagc  
37261 caaaatcacg atcattatta taaaaagaaa aaaagagaaa gctggctagg cgaacttttt  
37321 gatttttaat ttatgaaaaa tataaatcctt tataatccttt ttagtttaat atcttaaaat  
37381 atcaagcaaa aaggatataa aatgtatgaa tttttactac acgaaccctt agcaaataaa  
37441 aattccaaac acaatcacga agatcactcc catgaacatc atcacgctga tgcaagaagt  
37501 atggataaga aaatattaaa aatttctcctt ttgatgacct tctcaatgat gctggttcaa  
37561 tttgtatatt ctttactttc taattctcctt gcgcttttaa gtgatacttt acatatgttt  
37621 tcagatgttt ttgccctaac acttagccttt ttagctatca tcgctataga aaaatggcag  
37681 gatcatcaaa agacttttgg ttattttcgc ttagaaaatt tggtcgcatt tatcaatgct  
37741 ttaacatca ttttatctgc gatttttatt atctatgaag ccatagaaaa acttataaat  
37801 ccaagcagta ttgatgctaa aactatgata attgtagctg ttttaggttt tttggtaaat  
37861 gctataaatg cttttatgat gtttagaggt gcaaatttag aaaatgtcaa tatgaaatca  
37921 gcctttttac atatgatgag cgatttggtg ggttcttttag tgggtgattat aggtgggtatt  
37981 gctgtatatt ttagcggcat agtttatata gatacgattt tagctattat tttatcgctc  
38041 ttacttttaa gatggctgtt aacacttctt aagcaaagtg taaatgtttt acttgaaact  
38101 tctcctgtgg atatagaaga ggtaaaacaa gctttgcttt taaattctaa agtagaagag  
38161 gtgattgatt tgcatatcac acaaattacc aataaaatgc tagtagcttc tatgcattta  
38221 cgagttaata tcgatgattt aaaagaattt gaacaattat cctatgattt atcgcgatgat  
38281 ttgttgacc gatttgaat agggcatatt accattcaac ctttaaggag taaaaatgaa  
38341 atttaaagt gcaaatatca attgtcaaaa ttgtgcaaat ttgattaaaa attcctttaga  
38401 agatattttt ggagagatca agatagatct tgatgcaaat ccacgcacgc taagtttaaa  
38461 tttagataat tcaagagaag aagagtttaa aaaagaactc agtgagcttg gttttgaagt  
38521 tttagaaaag attgaataat gcaagaattt cgtgtaaaaa taggtaaaaat gacttgcgta  
38581 aattgctcca atgccataga gcgcgcttgc aagaaaatac aaggagttag tgatgcaagt  
38641 gtttcttatg tgaattctag cggagtgttt ttgctcgaag atgaagcaag gagtcaagat  
38701 gtgggttaaaa aaattcaaaa tcttggcttt gaaatttttag aaaatgagca aaatttggaa  
38761 gaataccgca aaaaagaact cattgctttg cgtaaaaatt tgcttttaag tatagtttta  
38821 agtgctttga ttatgtattt tgagatgttt gatacaagct ttttaagcca aaatatgcaa  
38881 atgcttctaa gcttttttgc gattttttat tgcggttagga cttttttctc tcatgcgatt  
38941 aagggtttta aaaattggaa tttagatatg aacactctaa tcgcttttagg ctgtatcagt  
39001 gcctttgctt actctttttg tatatattta aatctttttg aagatgaaaa gcatctttat  
39061 ttttagcggtg cagctatgat tataagtttt gtgcttttgg gcaaattttt agaaacaaat  
39121 gctaaattta aggcttttaa ttatcaaaaa agactcaatg aaattgatat aaaaaaggcc  
39181 aaaattttta acgaagcagg agagcttagc gaaattcaa gtgcttttgt taaaaatgga  
39241 gatatcatag tagtaagcga ggggtgaaagc gtagcagttg atgggggtgg gatccaaggt  
39301 aaagccgaga ttgatacgag ttttttaagt ggagaatttt tgcctagtaa tgtaagagtt  
39361 gatgatgaga taaaagcagg ctctatactt ttaaattggaa atttgcatat aaaagcaagt  
39421 aaaaaagcta tggatagtac ttttagagcag attaaagatc ttgtctttaa agcaggaaat  
39481 atcaaaactc ctttagaaaa ttcagtcgat agaatttcta gatattttgt cattacaatt  
39541 atcgcttttg cttggcagtt ttttgtattt tggagcttta aagcaggtgt gagcaggct  
39601 tttttacacg cttgtgcagt tcttttaatt tcttgtcctt gtgcttttag gcttgcaact  
39661 cctatcgctt taatcaccgc tcaaggtgcg gcgatgaaaa attttatctt gattaaaaat  
39721 cctgccgctt tagaaaattt aaataaaatc aagacagctt tttttgataa aacaggtact  
39781 ttaacgcaaa acaatttaga acttttttag cacaatttaa atgctaaaga ttttcaaag  
39841 ctagctttta tcgaaagtcc aagttctcat cctatcgcta aggctatctt taaagcttct  
39901 aagataaaaag ctcaaatttt aaaaggaagt agtgaaattt ttataggcaa ggggtgtaaaa  
39961 tacacagaag aaaatgaaga atacttgcta ggaaatttaa aattcatgca agagagtggg  
40021 gtgaaaaatt tagaaaaggc agatgaattt ttacaaggct taaaagaaga agctttaatt  
40081 tgtgtgtatt tttctaaaaa tggcgagtac ttaggggtac ttacttttaa aaatacccta  
40141 aaagaaggag ctaaagagct tatagaggat tttaaaaagc aaaaaattca aagcattatt  
40201 ttaagtggag ataataaaaa aagcgtacaa ggtgtcgcga atttattggg tattgtttag



40261 tttaaggcag gattgttgcc tgaagaaaa ttgcaaatca ttaaagatca taagcaaaat  
40321 tcactttttg taggagatgg gattaatgat gcagccgctt taaatgtggc gagtgtgagt  
40381 atgagtttta aagaggaag tgatttggct aaaaatgctg gagattttat actcatgaaa  
40441 gatgatttaa ggcttatttc ttgggtgtttt aagcttgcta aaaagacaaa aaatattatc  
40501 aaactcaatc ttttctgggc atttttttat aatattcttt gtattcctgt agccgcaggc  
40561 tttgtgcctt ttatcacttt aagccctcat ttagcagcgc ttgcatgtg ttttagctca  
40621 ctttgtgtag tgcttaattc tctaaggctt agaaaagtct aaaccttaga gttttagttt  
40681 tctattttgg gttctccaaa atattctctt aaagcttctt ttgtatcctc ttgaggatca  
40741 aatttctttg ccccttgttt tagctcatta aaagaagagt gaagatctat tttcttagaa  
40801 ctttgcgctt cattattttg ttgaggtagt tcttgggtta aggattgtaa tttgctctca  
40861 tctataatga ttgctttttg tacagcaatt ttagcattgg aacccaaatg atttctaaaa  
40921 agttcttggg tcaagtttaa gcccttgtta agcttatcac gattgcttcc ttgtgcgttt  
40981 gagccaatag tcaaaatttc attttcataa cttataaatt gagtgctttg tttaaaacat  
41041 tctccaagtt cataatccct atcgtagatt ttttcaagta aaatttcata tgcattttta  
41101 atcgggtgatg atttttgaat ttctactgct ataggggttt ttatttcttg tttttctgaa  
41161 ttagaatttg tatttgtgag gtttttttga atttcattaa tttgcgtatc gatttctttt  
41221 aatgacttg cttccatcat cataaaagcc atcacgcaa gtgtaaagcc atcatcatcg  
41281 cagataagat tttttgccct tgctaggata cggaaaaatc tttcataaat gagagttgaa  
41341 aattcactgc tttttgcaaa aaaactttct tttaaataaa aaagcatttc atcaatcacg  
41401 cttgaggctt cgtagtcttt aagctcttct aaaaaatcaa aaactctatc cttgtttttg  
41461 gttaaaatgg catggtaaaa ttccttgatt ttagcagggt ctaaaagcc taacatatca  
41521 gtaatcttgc tcgtacttat atcgttttgg caaaagataa tagcttgatc aagcaaagta  
41581 agagtatctc ttaaagagcc gtttccgctt cttgcgacaa atttcaaggc ttcttcttca  
41641 aatttgacat tttctttggt taaaatttct tttaaatgat ttaaaatttc attttgcgga  
41701 atttgcttga agcgaaaatg ttgctcctt gaaagcacgg tagcgggcaa ttttaaagga  
41761 tcggtggttg ctaggataaa ttttaccatag cttggaggct cttctagtgt ttttaaagc  
41821 gcattagcag cttgaggtgt tagcatatgc acttcatcga tgataaagat tttaaatctt  
41881 gccatagaag gggatatattt ggtttgctca ataagagctt gtatgtcttc tagcccgcga  
41941 ttgctagcag cgtccatttc tatgatgtct atatgtttgc cttcgagtgc agcaaggcat  
42001 tgtttgcaag ttccacaagg agtatcgtt gggccattat cacaaactag agctctagaa  
42061 aaaattctag cacttgaagt tttaccactt ccgcgtaagc ctgaaaagag ataagcatga  
42121 gctaagcgat tgtgatntaa tgcatatttt aagcttgtgc tgactgtctt ttgtcctatg  
42181 agttcatcaa aggttttagg tctgtatnta atcgctaagg cttgaagcat ttttactcat  
42241 tcataataga taaaagttct acattgtctt tagtttttaa catttttgaa taaagaaatt  
42301 taagcgcttc gatatcatcc atttgagaaa tcgccgagcg aatagcccaa attttttgta  
42361 gctctgccac tccttgtaaa agctcttctt ttcgagttcc ggatttgatg atattaatcg  
42421 caggataaat tcttctatct gaaatatttc tatctaagac tatttcgcta ttaccgctc  
42481 ctttaaattc ttcaaagatc acatcatcca ttctcgaacc tgtgtcaata agtgcagttg  
42541 ctactatggt caaagatccg ccattttcta tgtttcttgc tgcacaaaaa aagcgtttag  
42601 gtttatgaag tgcattagca tccacccac cacttaatac ctttccactg cttggagttg  
42661 cagtgttata agctctagca agccttgtga tactatctag taaaatgata acatctttgc  
42721 ctgtttccac cattcttttt gctttttcga taacaagctc cgctacgca acatgattat  
42781 aagcaggtaa atcaaaagta gagctaaaca cttcaccctt tacacatctt tgcatatcag  
42841 taacctctc aggtctttca tcgactaaaa gaacgattaa atgcatttca ggatgatttt  
42901 tagcaatcgc acttgctagc tctttcataa gttctgtttt accgttctt ggtggcgcta  
42961 cgatgagtcc acgttgtcct ttacctatag gggtaaaaag atctaaaatt cttccagtta  
43021 atttcatagc atcgtattcg agtttgattt tttctgttgg aaaaatagga gtgaggttgt  
43081 caaataaagg tctttcttta gcttcttgca aaggcaaata ataatcgct tctatnttca  
43141 aaagagcata gtatntttct tgatccttag gctctctaac ttgtccagtt actatatcgc  
43201 ctacgagcag ggcaaatttg cgaatntgtg agtttgaac ataggcatca ttgacactat  
43261 cgcttaaat tgaatccata ccccttaaaa agccataacc ttctgaagaa atttctaaaa  
43321 ttcctgtgaa aaggataaag ccaccctttt tggtttgagc ttttaaaatt tcaaaaataa  
43381 gttcttgacg acgaaattct ctaggatttt ctatctcgca ttcattagct attttaacta  
43441 gattnttctaa gtcaagcaat tttaaatctt caatnttata accctccact ggaatgtggg

43501 ttctttgatg ttgttttttt tctttttcca taagtcctcg caagaaagca gtaattttgt  
43561 agcaaattaa aaccgtgatt ttagtaaaaa aatatacttt ttgtcaaatt tgtctataat  
43621 tataaaaaat atttttttaa agaattgatta tgaaatgtga acattgtaga ttagattatc  
43681 aaaaatctca aatgatagaa gctaagggtg aatttttttg ttgtaggggc tgtttgagcg  
43741 tttgggaaat tttacatgaa agtggccttag atgaatttta cgaaagattg ggcaataatg  
43801 cactaaagcc agttagcctg gaattttcta acaaaaatta tgatgagttt atcaccaaaa  
43861 ccaaagaggg ttttagtgaa atttatctca tgatacacgg catagaatgc tctgcttggtg  
43921 tttggcctta tgagagagtt ttaactaaac aagaaggaat tttggagtta gatatacaatc  
43981 acctttcgca taaagcacgc attgtttttg atgagcaaag tgtttctttg gcacaaattt  
44041 taaatcttat tgaaagcata ggatataaag ccagtgccta tgatccgtct aaaaattcca  
44101 aaaaggcggg tttgatcaag cgcaatttt attctaaact catagttgcc attgcttggtg  
44161 tgatgaatat catgtggata gcagtagcaa aatatgcggg attttttagc ggtatggata  
44221 gggatattaa agatatttta aattttgctg aatttatcct ttgctctcct gtgctttttt  
44281 atacgggttc gaatttttat aaaagcgttt ttaaagccct aaaaatgcgt agtttaaata  
44341 tggatagcct ggttataagc ggagcaagct tggccttatgg atattcttta tgggcatgtg  
44401 tttttagagt aggtgaggtg ttttttgatt ctgtggctat gattatttgt tttgttttta  
44461 taggcaagta tcttgaaatg ttttagtaaaa aacgcgcttt ggatacagta gatggcctaa  
44521 atgatttttt acaaaatgaa gttttggttt ttaatggcaa agattttgag cctaaagatg  
44581 ttcaaaaggt caatatcgga gatagaatth tacttaaaag tggggataaaa attctcatag  
44641 atggaatttg caaaaaaggt gaagcaagta tgcacacttc ttctttaagt ggtgaaaatg  
44701 agccttgttt ttaggtgta ggtggcattg taaattcagc ttgtattgta ctagatggaa  
44761 gtatagaata cgaagcaagc aagctttata aggattctaa attaaatcaa atcataagac  
44821 ttttggaatt tgctagtact aaaaaagcta ggcttgaaag cttggtttct caaatttctg  
44881 cttatttttt tcgcaccatt ttaactcttg cttgctttg tttttcttt tggctgtttt  
44941 atcataaaga aagtgttgaa atttcacttg ttcatgcgat ttctgtttta atcattgctt  
45001 gtccttggtc tttagcttta gctactccag taagcaatct tatcgctttg ggtcaggcctt  
45061 taaaaagagc gattttgttt aaggactcta gtgtggttga aaaactttca aatgcgata  
45121 tagcggattt tgataaaaca ggagttctta ctcaaacca attaaaaata gctgaagtth  
45181 ttttagatga aaaactaaat ttagatgagt tttatagctt tgtatcgctt tcaaatcatc  
45241 ctatcgctaa aagtgtagcg cagttttttac aagataaaaa cgcaaagctt ttaaatttgg  
45301 attttaaggg tttgagcaat atccaagcaa agggcattaa agcttatctt gataatgctt  
45361 ttttttggg cggaagttcg aaatttttag aagataatgg gataaaatgc aaaaaagaat  
45421 ttaataattc tcattttatc tttgcgcgcg ataataaat tcttgcttat tttgaattht  
45481 caagtgtgct aagagagggc gctaaagagc ttatatctta tcttaagcaa gctaaagattg  
45541 atacgatgat ttaagtggg gataatgaaa aagcggttga aaaaattgct aaagaattag  
45601 gcatttcttc tttttatgca tcttgcttgc ctcaagataa aatgcaagca attgaaaatt  
45661 taagccataa gaaaaaagtt ttatttgtgg gcgatggagt caatgatgcc ttggctttaa  
45721 aatatgctgc ttagcaata tctttgcgcg aggggagtga tttggcgatt gaaaatagcg  
45781 atattttact tttgaaaaat gatttgcttt ctttaaaata tgccattaag ctttctaagg  
45841 atacttataa aattatcaag caaaatthaa ttctttcttt agcttacaat gcttttacca  
45901 tacctttggc attttttagc ttaattaatc ctttaatcgc agcactttct atgtctttta  
45961 gtagtataat ggtgattttt aacgctttga ggataaaaaa tgaatagtgt aatcatgatg  
46021 atgatagggg tttcaatact gggttttttt attatactag ctactttgct ttgggggata  
46081 aggactaaac aatthgatga tgattataaa tttactactt taaatgatga tgaagatgct  
46141 ttgcgtgatg ctatagaatt agaaaaaaga aaaaaggaag ctttaaaaaa gagaaaataa  
46201 aggctttcta aaatthgaaa gccttaaaat tataaagttt caatataagc ttcaatagct  
46261 ttgaaatctt cttcagttaa acctthagg ttgattttca tgatcgcacc ttgtccataa  
46321 gcatttcttt taccttctga gtattctttc atatatthgaa gtctttcagc tgaagagatg  
46381 ctttttaatg ctggaacttt gtttagataa actttatctg cttttgcacc gtgacatact  
46441 gcgcattttt taaaaagtgt agctccatct gcagcgaaag ctgatacacc aagacatgct  
46501 aaagcagaaa ctactagtaa ttttttcatt atattctcct tgaaaagtth taatacacia  
46561 taattatata tttthtaactt taacatthtt ctttaaaata tcaaaatgth tattttcttt  
46621 aatthgaatt atattataat atacctatga aaagaaaagc gttatthttt gatagagatg  
46681 gcattataaa tatagataaa aatatgthct ataaaaattca ggattthtgaa ttttthgatg

46741 gaatTTTTga gctttgtaga tatttttttag cacaaaaata cttgctTTTT gtagctacaa  
46801 atcaatcagg cattgcaaga ggggtattata cccaagaaga cttttctaag cttttagatt  
46861 ttatgcttga tgaatTTatg aaagaaaata taaaaattga tagaatttat cattgtcctc  
46921 atttagaggg ctgtgagtgt cgcaaaccta aagcaggaat gcttttaaaa gctaaggaag  
46981 aatttgatat agatatggat aattctatTT ttatagggga taatattagc gatatgcaag  
47041 ctggaaaaaa cgcacaaatt ggcactttgt gtttggtaaa tgaagaagaa aaagaaggcg  
47101 attttttttag acaattttaa aattttaaTG aactttttaga ttttttcaag aaaaaggaag  
47161 atagatgaaa atagcaatca caggaggcgc aggttttata ggctcacaac ttgccttaaa  
47221 tttacaagat gagcatgaaa ttttaatcat cgataaaatg cgtagttatg agacttttga  
47281 aaatggaaat ttgcaaagtt ttggacattt taaaaattta ctcgatttta atggcgagct  
47341 ttttgtgggc gatattaatg atgaaaaggt ttttaagaaaa atcgaagatt ttaaaccgga  
47401 agtgatTTTT catcaagcag cgatttcaga tacaacagtt tttgatcaaa ctaaggTTTT  
47461 acagactaat cttaacactt ttaaagattt tatagagctc agcataaaac ttcacgcaaa  
47521 gcttgTTTTat gctagttcag cttctgttta tggtagtgca aaaagtccac aaaccgtagg  
47581 taagaatgaa gagcctaaaa atccttacgc attttccaaa tttatgatgg ataagctagc  
47641 taaaaaatac tacgataaag cccatttggT aggacttaga tattttaaTG tttatggtaa  
47701 aggtgaatTT tataaaaaaca aaaccgcttc gatggtagtg cagtttgcTc atcaaatttt  
47761 agccggaaaa aatccgcgtt tatttgaggg aagtgatcaa atttttagag attttactta  
47821 tattaaagat gttatcagtg caaataaaat cgctcttgaa tcaaaatgcg gggtttataa  
47881 tgtaggaagt ggagtagcaa gaagctttca agatatagta gatattttac aaaaagaact  
47941 tcatacaaat ttaacttgcg agtatatccc taatccttat gcaaaatctt atcaatttca  
48001 tactcaagca aaattagatg aaacttggga ctataagcca aaattcagtt tagaagaggg  
48061 tataaaggat tattttagaag aaatcaaaag actttttgaa aaggaagtaa atgcttgaat  
48121 ttttaagtga gcaaaatcca aaaattctta ttatagggga ttttatggTg gataattaca  
48181 cttggTgtga ttgttcgcgt ataagccctg aagctcctgt ttttagtagca aaaacattaa  
48241 aagaggataa aagactaggt ggagcggcaa atgtttatgc aaatttaaaa agtctaggag  
48301 cagatgTTTT tgcacttggT gtcgtgggtg atgatgagag tgggaaattt ctaaaagaaa  
48361 atttaaaagg ggaatTTTTg gtccaaaaag gacgcaaaac cccttttaaa aatcgtatta  
48421 tggcgcacaa tcagcaagtt ttaagacttg atgaagagga tacgagcgcg attttgctag  
48481 aagatgagct tgtagaattg ttttaataaaa gaattagcaa tttcaaagct gtggttttaa  
48541 gtgattatgc aaaaggagtt ttaacaccta aagtctgcaa agcttttatc caaaaagcaa  
48601 atgaactaaa tatacctatc ttaatcgatc ctaaaggaaa tgattttagc aaatacagcg  
48661 gtgcaacact tttaacaccc aataaaaaag aagctctaga agctttgaaa tttgagaatt  
48721 tagagagtga aaatttagaa aaaggtatta aaaaattaaa agaagatttt agtttgcgtt  
48781 attctatcat cacgctttca gaagcagggga ttgctctttt tgatgagaat ttgcgcatag  
48841 ctctgctaa ggcttttagaa gtttatgatg taaccggagc aggtgatagc gtcatcgctg  
48901 ttttggcttt ttgtttggct agcggagtgG aaatttttaa agcttgtgag atcgcaaagT  
48961 aagcagcggc tatcgtagtG agtaaaatag gcagcgtgag tgtgagcttt gatgagatga  
49021 aaagctttaa acgcgtaggt tttgaaaaaa agatcaagac taaagaagag cttttaaaga  
49081 ttttagagca aagtgataaa aggatagttt ttacaaatgg ttgttttgat atcgtgcatt  
49141 ttggacatat aaaatatctt gaaaaagcaa aaagattggg cgatatttta atcgtgggct  
49201 taaactctga taaaagcgta aaaaggctta agggcgaaga tcgtcctgta aattcagaat  
49261 ttcaaagagc ttgcatgctt gcggcttttt attttTtgga ttttTtagtg atttttgatg  
49321 aggatacacc ttttagagctt ataagctttt taaagcctga tatttttagta aaaggagctg  
49381 attataaaga caagcttTtg gttagatcaa atttggtttc aagagttgaa ttgatcgatt  
49441 ttgaagaggg ttttagtaca agtaagatta tagaaaaaat caaggataaa aaatgataaa  
49501 ttttagtagaa aaagaatggc aagagcatca aaaagtctcc caagcaagtg aaattttaaa  
49561 agggcaaatc gcaaaagtag gcgagctttt gtgtgagtgt ttaaaaaaag gtggaaaaat  
49621 tttattttgt ggaaatggcg ggagtgctgc ggattctcaa cattttgcag cggagcttag  
49681 tggcagatat aaaaaagaac gcaaagcttt agcgggtata gctttgacaa cagacacttc  
49741 agcacttagc gccataggca atgattatgg atttgagttt gtttttcaa ggcaagtaga  
49801 agctttggga agtgaaaatg atattttaat aggcatttca accagtgga aaagtcctaa  
49861 tgtcctagaa gcatttTaaa aagctaaaga attaaatag ctttgcTtgG ggcttagtgg  
49921 caaaggaggt ggaaagatga atgagctttg cgaccataat cttgtcgtgc caagcgatga

49981 tacggctaga attcaagaaa tgcatatcctt aatcatacac acgctttgtc agatagtaga  
50041 tgagagcttt tgatgaaggc atttatcatt aatttagagc gttctttaga tagaaaagag  
50101 tacatgcaaa ggcaaattca aaaacttttt gaaaagaacc ctgatctaaa aaataagcta  
50161 gaatttattt tctttaaagc agttgatgct aaaaataaag aatatttaga ttttaacaa  
50221 cattttcctt ggtgggcttc ttgggcttta ggtagagagc ttagcgatgg agaaaaggct  
50281 tgttttgcta gccattataa actttggcaa gaatgcgtaa aaattgatga gcctataatt  
50341 atcttagaag atgatgtgga atttagcgat gaatttttaa ataattgagga agaatacata  
50401 gaagaattat caaagagtga gtatgaatat gtaagatttt gttatttggt tgataagaaa  
50461 ttttatcctt taaacaacaa ctatctttta agttttgaaa aacttgcagg aactcaaggt  
50521 tatgtattaa aacctagtgc tgcaaagaaa tttataaaat acgctaagcg gtggatttat  
50581 cccgtggatg attatatgga tatgttttat aaacataagg tattaatat cgtgaaaaaa  
50641 cttttattgt taaagcatga ttgtggattg gaaagtatga tttctcaagc tggacgtctt  
50701 tttatcaagc ctaggcttta taaaaaatt attagagaaa tttttagact ttatagagat  
50761 gtttcaaaat tatcctatgt tttttatatc aagaaaaaat taaagcttaa gtaaaatttc  
50821 ggattgcttc taaaattttt tccggtttta aatctttcat aactgatga tgttttaag  
50881 gacaggtttt ttgcatacaa ggcatacaag ctaaatttag atgcactaat tttgattttt  
50941 gattttgcca aggtgagggt tgggtaaatt tagtaggcc aaagatagct acagtttttg  
51001 ttttataagc ggcagctata tgcataggac cgctatcatt tgtgatgaaa atatcgcaaa  
51061 ttgcgatatt ttgacaaagc attttgatgg tggttttatt gcaaagattt tttacctga  
51121 catttttttc ttttaatata tgaaaaattt catcacagag ctcttgttct gccttgctg  
51181 ctccaaaaat caaaatttca tgagttttgc taaaatttaa agcaacttgt gcaaaataac  
51241 tcgcatcca tcttttagca cttccaaaac ttgctccagg atttaagcct aggatttttt  
51301 tgccattttt taaaacaata ggattttgaa attttaatct aaaagggagt tttaaatcct  
51361 tagaatgagc tttgatattt agtgaatttt ctataaaata aagatatttt aaaacctgat  
51421 gttcttcttt gaaattatac ttgttaaaaa aatatctttt ttttgcctta aggatattga  
51481 aatgatattt agaggaaaa gctgatctaa aagaaagggc tagatctatt tttccaagtt  
51541 ttttacgcaa agagagggct tgctttagtc gtgatttttt attttctata atgatttttag  
51601 cattaggaat ttcttttaaa agtgctgtgg atacaaaaga tccataaagg ataaattcag  
51661 cgtttttaaa atgatgataa actccatata aagcagatga agccatgact gcatcgccga  
51721 gccaaagtggg aagatggata aaaattttca tagatttctt aaaatttgat aaaattcttt  
51781 ttattatttt aacaaaattt agggaaaata tgccacaact ttctattata atcccgtctt  
51841 ttaattcttg tgattttatt gcaagagctt tgcaaagctg tataaatcag actttaagag  
51901 atattgaaat tttagttggt gatgataaaa gtgaagatga gagtgtaaaa atagccttag  
51961 aatttgctaa aaaagatgag agagtaaaaa tctttcaaaa tgatgaaaat ttaggcactt  
52021 ttgcgactag aaatttagga gttttaaaat ctagagctga atttatcatg tttttagata  
52081 gtgatgattt tttggcttta aatgcttgcg aagtggcttt aaccaaata aaacaaggct  
52141 ttgatttgct ttgttttgat gcttttgtag atagagtcaa aaccaaaca ttttatcggt  
52201 ttaacaaga tgaagctttt aatcaaaaag aatttttcga atttttaggc aagcaaagac  
52261 atttttggtg gtcggtttgg gcgaagcttt ttaggaaaga tttgatttta aaaagcttg  
52321 aaaggataaa tttatacgag cgtttgagtt atgggtgaaga tgtgcttttt tgctatatga  
52381 attttttaga atgcgataaa atgggtggtt taaagagtg catttatcat tatgaattta  
52441 atgaaaaggg tagatatgaa aacaaaata aagaaatttt gtggcaaat tacaagaca  
52501 aaaaaagaag caatgagctt ataaaaagc tttctttgaa atcaaaagac gatgaatttt  
52561 gtaaaagatt gtttgagggt ttggagaaag aggagggtga ttttattgag agattaaaat  
52621 aggttttaaa ttttttgatt ttggttttta tatgttttta aaataaagtt ttcttaggtt  
52681 gtgatataaa attgattttt tattattttt tctctagtaa agcaagtttag tgagttattt  
52741 ttaacttagg ataaatattg taaaaatcag caaatgata tttctatcgt ttaattttta  
52801 aataatctta ctattgtttt ttcgttaaat ctatattttg caatttttagt tggatttctt  
52861 gcagctaatt taaaggaat atatcttttg taaaattaca gctctttgtc ttataataca  
52921 tcctattcca agtgaatac cttgcttaag caaacattt tttctatcca aacattattt  
52981 gtattactaa gtgtacaact gataaacttg gcttgtgatt gactacaggg gatattttat  
53041 tgatgaattt tagcaaacat tgtaataaaa gctatgattt gccttataag taaaacttgc  
53101 atgattttat ctataggatg ttaaaaactg aacatagtaa tcccattggc aattgagcaa  
53161 tatctttcaa cattggtata gcgaggcaag aaagagctag agtagaagaa aaataaatca

53221 atattactaa aattaaagt acaatattcc tctataccta ttttgtctgt cagttggttt  
53281 tctaattgaa tggttgtgaa atcttttagtt ttttagctttg aaaattttct aggactattt  
53341 atgaaagttt tttattgcaa tatatttgca ttgtgctata aagttatttt ttccatattt  
53401 gttctacttt ttctaaatct tctaagttgt caatgtcaaa acttgaaatt tcatccatta  
53461 aaaaatattt tgtattttct tgtaaaaagc taggattttg caagaaatct ttggttttta  
53521 aatatataat tgcaccattg cttatataag tttttggcag tttttgcctc ggcataaagg  
53581 gataattatt attgcaaata ccttttaagt tacccttttc atcacacata aaagctttta  
53641 gaattttatt atcgactca caaacactta ttagcgagtt agcatttgta tttttaaata  
53701 tctcaaaagc tttatctatg tgttctgatg ttcttaaagg tgaagtaggt tgaagcaaga  
53761 taacattttc ataatcttta taaaattcta aagcatgcaa tacaacttta tcaactagttg  
53821 tatcatctag tgctaattct tgaggctctt ttaatatgtc tataatcttga gtttttccat  
53881 attttaatat ttcgtcccca tcactactta agacaatttt atctatatat tttgattttt  
53941 ttgctgcatt gatggtatag tataacaaag gtttattatg caaagaacg agatttttat  
54001 tttttatgcc ttttagagcca gctctagcag gtattatggc taaagtcact gcttattacc  
54061 taatttaaat ttgtttaata tttcataaat tactttttca tcaagcagtg cataatttat  
54121 tttttttatt tttctatgct tatagtgaat ttttttaaat tcttccaatg ttaaaatatt  
54181 taaatatttt tgatagttat ttctgcgata tttcagggca ggaaaatgcc attgaagcaa  
54241 ctccgcttgt aatattttta cgtttttagg tataatttgt tgttcagaat ataattcttt  
54301 tgtggtttga tcaggatcta tccactgact ttgcttgga accattcttt ctgtaaatat  
54361 gctattatgt ttttgaatta gcaattgatc ttctccattg ataaaacat tctcccccc  
54421 ccctatatct tgaataaaaa tttcattatt taatattaaa aaattaattc ttggaaatct  
54481 tacagcggta tttttcgatg ccatatagaa acttttatat aattttttag catcataata  
54541 atgatccaca tcaattttta taagccattc atcttctggt ataaagcttg caacataatt  
54601 ataatagcta taaagtttat tttcttcact ccatggattt tctatttggga cttcataggg  
54661 gtattttatc ggtataaatg aaggatattg cttgcaaac tgtaaaaataa tttcttcact  
54721 tccatcagtg caatcgttat atcctataac acctctttgt atggctggta atatactttc  
54781 caaagaagct cttaaagtaa gggcttcatt ttttactctt atgaaagccc aaggatttaa  
54841 tggagatttt ggatcttttg aggctggatc aaaattaaaa aatcctttat gttcttcatt  
54901 ataaataactt tgattttaat ttaaaaaata ctatttagtg aagtttaatt ttttggaat  
54961 cttgaatact cttaaatagg ctataatttt gtaaaagaga atcattttta cctatcccta  
55021 aatatttttt gtttattttat gtcaaacaaa ctattatttt tcaataattt gtagaattgt  
55081 tcagagctat ttaaaatatt caattttttt tttacagtat tattgtgttt atgaagactt  
55141 aaaatagcct ctaatatatt tttttcattt gcttttactt tggttatctt gtcaatatca  
55201 gttctacat cttgtcttgt tccaatcaag atcccatttg taccaagata caaagcttct  
55261 tttaatatac aacttgaatt tcctatgata aaatcagcat tttttaacaa gcttataaaa  
55321 tattcaaac ttaaagaagg gaaaattttt aatttatcat tatttttaag tttttcataa  
55381 ttttgcaaaa tcagctcaaa tcctagatca ttattaggat aaataatgat atagtttttt  
55441 tcacttttta taagggcatt tacaattctt tcactttggt tataaagaga atttatttca  
55501 gtagtaactg gatgaaacat cgctatagca taattttcaa aatttatatt atagtatttt  
55561 tttgcttcat ttaaagatat gttattgttt aataactcta aatcaggaga acctatgata  
55621 aaaatagatt tttcatcttc tcccatttgt attaatctct ttttagctat ttcatcgttt  
55681 accaaatgaa tatgagctaa tttgctaatt gcatgtctta aactctcatc tatagtccct  
55741 gaaagctctc cgccttctat atgtgctact aaaatattat ttaaacttcc cactgctgca  
55801 gctgctaaag gttctatcct atcgccatgt acaacgatta aatcaggttc aacttcatgt  
55861 ataaatttag aaaagccatc tatggtatag gctaatgctt tatctgtttg ataatactta  
55921 tcgtgattga tgtatttata tatattttta aaaccgatt tttctatttc tatataagta  
55981 gagccaaatt ttttgctcat atgcataccg gttgcaaata taaataattc aaattcattt  
56041 gaattttcaa cttcatcat taaagatttt atcttagaaa aatcagctct agttccacta  
56101 acaaaaacta ttttttcat ttaaaatctt cccatgtaag ctgctatcg ttttttatat  
56161 ctttactgc tttttttcca agtatatttt caaattcttt tgcgttaatt ccaccaagcc  
56221 ctggtctttt aaccxaaata ttgtccatag ataaaatttc atcttttttt atatctttta  
56281 tacttactac actagcaaat gcaaaatcga tagtaacttg ctctcgggtt gttgcttttt  
56341 tgcttgact atctcctctc attatggcca tctgttcgct ttgtattatg agctctttta  
56401 atgcttgttc atccatagaa caaattatat cgggtccttt tctatccata gtatctgtaa

56461 aatggcgctc tagaacgcaa gctcctaagt caaccgcacc caagcatgca agattatctg  
56521 tagtgtgatc acttagaccg taaagacaat gaaattcttt atataactct aacatagcct  
56581 gtaatcttac taaatgtgat ggggtaggat ataaatttgt agtgtgcaat aaaacaaagg  
56641 gtatttcaaa atctctaagt attttaaccg taggtttaat actttcgatg ctattcattc  
56701 cagtgcttat tatcataggc tttttaaatt gtgctatgtg tttgattaag ggatagtgtg  
56761 tacattctcc tgagcctatc ttataagcac tcacacccat atcttctaaa cgatttgctg  
56821 cagctctact aaatggggta ctaatatata ccaaaccctg tttttccaca tattctttta  
56881 gaactaactc atcttgataa ctcaaggcac atttttgcat gatctcgtag atgctaatat  
56941 ctgcattacc tggataaact ttttttagctt cttgactcat ctcatcttct actatatgtg  
57001 tttgatgctt gattatacta gctccagctc ttttggctgc atctaccatg agttttgcta  
57061 tctctaaact accattatga tttataccga tttctggtac tactaaaggc gggttttttt  
57121 gagatatggt taatttatct atttttatth gcatatthtt cccttatgta gtgttttata  
57181 tcactaggaa gatgaaggaa atccttttatt aattttataat aaagattttc ttttaatttg  
57241 ttttttcttc catggtatat ttcttgtgcg tatttagttg gtagcaatat gtcatttatg  
57301 ttttttttg gtttgctatt taatacgaag tcatttccaa catctggagc taaattaaaa  
57361 taattatttg aatttaggct ataaatatta atattatatg tctttattaa aaaatttaaa  
57421 gcttgtaagt cgtattccat tgagtgatta ataaatttaa atttttcatt tttaaaacca  
57481 gtgcatatgt ttaataaatt ttttttatta ttatcaaagg catataaatt attcatatct  
57541 tgataaaaaat caataccgca cacatatata tttttatatt ctaaagcaac agctgtagca  
57601 cacatataaa ctccactagt aattctttgt tttttatgca cttcgttgta tataataaaa  
57661 gcaaaaaaat cttaagttt ttttataaatt ttatgcccta gaaaagcatt gctaaaatat  
57721 aattcaaaat tactaataaa atttactcca tctatataag gcaaaccaaa agaagagcaa  
57781 atgagattat ttatagtata ttcatttttt tgtataagtt gttttgcagt ataatttgc  
57841 tcaaagaata cgaaaggatt aaaaaagca ttttttatat cttccctgt aaagtattta  
57901 tcttcaaaat aaaattgatt acacctaacc acatcataat ttattggcag tttttataa  
57961 tctatatttt gtaaactagg accattgcca cactactaaag cattagtatt tatattcatt  
58021 tatattgcct tatgtttttt tagtataaatt atagcaaaaa aaagaaaaga atgcatatga  
58081 gtcaaaattc tattataact cctactttta atgtagaaaa atatatagca agagttttgg  
58141 aaagtgtgat aatcaaac tttaaagata tagaaataat tgtagtagat gattgtggca  
58201 atgataaaaag catagaaata gctaaagaat acgctattaa agataataga attaagatta  
58261 ttcataatga ggaaaatttg aagcttttaa gagcgagata tgagggcgta aaagtagcaa  
58321 cttcatctta tatcatgttt ttggattctg atgattattt agagcctaatt gcttgcgaag  
58381 agtgtgttaa aattttaaat acaaacaaaa atatatagatt aatatgtttt aattattatg  
58441 aatgtggtaa ttctagagaa gagtggactt tttttgatga tgcttgctat aacaatgaaa  
58501 gtttttgta ttttctattt tcgaaatatc ctgtatttag ttggaatatt tttacaaga  
58561 tatttaaaaa agatttatat cttaaagctt ataatgctat tgatttaaaa ctgatgaaa  
58621 aaaacactat ggctgaagat tttttattag ttttacctgg ttttaagttt gtaaaaacaa  
58681 tctatactac aaaaaaatat ttgtataaatt ataattgttc aaatgaaaac tcatcacta  
58741 gagaaaaaaa agatttttat aaaattaaat cctatgttaa cgatttatct ttcgtcatga  
58801 aaaaaatttc taatcttata caaattcagg ttaataaaaa ccatatttta atttttaaga  
58861 ttgctatatg tgatctaaat attcacaana ttgatttaat atgcaaatat atagttaaaa  
58921 atatttttga aaaaatttta ttaaaaaata aaagaaaaag aataaaaatg caaaaaaaga  
58981 atcttatcca acaagctaaa aatatccaaa aggaaaacaa tgtaccatat aatttttagt  
59041 gctgatgaaa attatattaa atatactct gttttaataa caagtattat taaaaatacc  
59101 aacccaaaaa atcattttca aaataggcct tatagttttc atatatggag caattttggt  
59161 agtgaggaaa caagggaana attagagcgg ttaaaaaaag aacttagtaa aatctatct  
59221 tgtgaaatat caattcatat catgagtgat gatagatttg aaaactttcc aagctcgggt  
59281 gcggcacaaa attctaaatt gccttactat aggttgaaat ttatttcttt gcttgatgat  
59341 aatgttgata agtgtttata tttggattct gatatgcttt gcatgtgtga tataagagag  
59401 atttttgcta tagatttgca aggcaaaaata ataggagtgt tcggagatcc tggaaagtaa  
59461 agatcaaaaa ttaaatttat agaaaataac acaaaaaaag ttttaaaatt tgatgaaaac  
59521 tatttttaatt caggtttttt acttataaat gccaaagagt ataaaaaggc aaatgttgaa  
59581 aaaaaatgag aagaattagc caaaaaatgt atttatatta aagcagctga tcaggatctg  
59641 cttaatgctg ttatccctaa agataaaatt ttaaaactta gctttgctta caattttaat

59701 attatcacac ttttatatgt gatatgcaaa gatgaaaaga aaaatagatt aaattatacc  
59761 cgcgagaagt ttacccaaag tgctaaaaat ccaaaaatTT tgcattatgg tgaaaaacct  
59821 tggaaatTTT taaaatctta tgtggatttg caaaatagaa atatcagtga ttattgggtg  
59881 gatatagcta aagaagtGCC tttttttaa gaagaactat tgaggcaaaa agagaatata  
59941 aaagattatt tactttatgc aggacttggT tttactctat ataatttatg taaaaaatat  
60001 caattattca ctataaaaca acttcttcaa acagagcacg atgcaaaact catagagttt  
60061 gcaaaaggac taaatgatga taaatatggT ctttattgta tgcttggTga aatggTttta  
60121 tatgctagaa aacacaaaaa gggTgtgatt aatattatTT taaaatcata taaaatgatt  
60181 aaaatgtatg aaaagtatgc ccataaatca agagatatta agaatttata agttttatcc  
60241 atttttgcat aatgatttct ttggaaaact cattttgaat tttttcctta gcattttgCC  
60301 ccatttgTtt tcttaggttt tcattatcca tcaataaaca aattttatct gcgaattcct  
60361 gcaagttacc atcctctatc aaaaaaccac tttttttatt ttctataata tcgcttggac  
60421 ctgtattaat atcaaaggaa accaatggaa ccccataaga gctaacttca actaatacca  
60481 tggggaaTcc ttcatataaa ctagtcatTg cataaatact agcttGtaa tattcttttt  
60541 ctatttcctt tgtaaaaggt ttttaagatga ctgaattttc taattcatat gcttttattt  
60601 tttgttctat agttttttta agctcacctt cgcccactat ggttaaagtc caatctttat  
60661 acacctcttt tttttgcacc attttccaaa tatcaataag tcttaaaaaa ctttttgat  
60721 cttctaaagc cattcttcca acgcttaaaa tttttttatt gcacaaattt gcattttgca  
60781 aagatttgca agataaaaag ttaggtataa cccaaatatt tttatgatat ttttccatt  
60841 gttcaatttg tttattagac aatatcacta gagcatcaaa ataattgTtt ctttttctat  
60901 atttttttaa actcatatgg ataaaattaa tatattttgt atttttatTT ttaaaaaaag  
60961 gaaaatgtgg acagttgtta aaaatcatta catcaatatc tttatatTTT tgctttaaga  
61021 tgtaactctc gtaatgcttg taataaagct tatataatgg cttttctttt tttacatcgg  
61081 tttttgattt atgatataag tagtctatTT taatgTtttc atttaactca taagcaatat  
61141 cttgcccttg cttataaaaa ctaaaaattt taacatcata cttgagttca aaaagtgcatt  
61201 ttgctagatt tataacaact ctttcagcgc cgccccctat ggtaatatca ccaataagta  
61261 ataaaatTTT catttccaag tcactttttt attttttata gtatctagat aaatttgatg  
61321 attgctttct agcatatTTT tgctatTTTc ttcatgatat atatgataag ctaaagcatt  
61381 aaatttaagg cgtctaaata agccattatt aaataaaaaat ctagctacaa actcactatc  
61441 ttctctacc caaccaacaa atttttcatt aaatccttca atggcttcaa aatcactttt  
61501 ataaaagctc atattgcaag ttttgctacc ttttacaaga tgtgattttt taaaaaaatt  
61561 cttattagtt tttgaaaaat tatagatcag gcaagctaaa aaatcattct ttttattttt  
61621 taattttttt ttgttgaagg ctagtTTtaa atcattatTT ttttaagatct ctttactttc  
61681 attttcattt aaaatggTtc tagaaccttg taagatagtt tttaatctag caaattttaa  
61741 atgatcggcg ataaagcttt tttccaaaat catatctcca tcgattaaaa taatatactc  
61801 actatttgaa gcattgatgg ctttattgcg acttgctgca gcacgaaagc ctttatcctc  
61861 ttgccaataa tgttttaata cacaaggaaa atttttttga tattcttgta taagttttgc  
61921 tgtatcttct ttacttccat cgtctgctat taaaacctca ttaggcaaaag gatctaaatt  
61981 ttttactacta tcgagtacta aagcaaggcg tttgggttga ttataagttg tgatgattag  
62041 ggcacaagtt tttggTtttt gcttttttag ctcatatagt ttcatatatt taaaaaagc  
62101 tccaagcca ttacatacac ttatgataaa gcctttatat ccgtaaaaaa ttcctttttt  
62161 taaaacataa tttctaaaaa aagtccaaaa cccacgcacc aaagccttgc aaattccact  
62221 ttctttgtgt aaattttgca aagcccaaag cttggagtat ttttgaagtt tgtcaagcaa  
62281 gtcattcaata ctttcaaaag caaaatgctt tagtccattt ttaagataaa ctttttgagt  
62341 atttggatgt aagattaagc tttcatggac taaattttca ctaaattttg tatgtttttt  
62401 attaaacact cttaaaacat gatcaggcca ccagccacaa gcttttatcc attctccttt  
62461 gtaaaggTtt ttgCGgtta aagctaggat attttgctct ttaaattcaa gtttttttaa  
62521 ttcttctttg gcttcgtttt ctaaaatttc atctgcatct atgtttaaaa tccactcatt  
62581 ttttagcatgg cttaaagcaa gattttttaa agctccaaag cctataaatt tgctttcgta  
62641 aatgtataaa tgcgcaaatt ctttttgaaa ttcttttagcg atttttaagg tatcgTcagt  
62701 gctttcattg tttaaaagta tgatttctcc aaattctttt aaagagttta aacattcaaa  
62761 cagggtgTtt tgagcatttt taactatgat gataacgctt attttttcaa gattcatttg  
62821 atacctttgt aaagtttttc atcataactt gcaaagcggc gatgaaagaa aaaatactca  
62881 tcaggcttaa atcggatcat ttcttcgcaa gtttttgctt gatattttgt aagttcttct

62941 aagctagaat ttaaaggatc aagggttttg aaaaatttaa tatgaaatth tttatcctct  
63001 ccttgataaa tataagcagg tatgatcaaa gtcctgttt ttcgagctaa gatactagct  
63061 cctgcttgat aatttactct tttgccaaaa aaatcaagct taattccttc attatcagtg  
63121 caatthtgat ctgtaagtat accaagtgcg cgcttgthtt taatagcact tagcatttht  
63181 ctaagtccac cththttgtc gataagttct atatcaaatt ggggtgcgatt tttagctaaa  
63241 agatcgggtca ththttgact tttgagttgt ttgcctacta tggaaatcgc cccaaattha  
63301 gcagcataag caagacttaa aagctcccaa thtcataat gagcagtggtc aaaaatcact  
63361 cctthttgct cthttagggc ttgggttaaa atthcttcat tatcaaagac gactthtatct  
63421 agaaththtt cthttacttgt atthttggtht ttaatgcaat ctatcccaa tttagcaaaa  
63481 ttgtttataaa thttaaaagc aagthcttht cthttcatct cattthttatg aggaaagcaa  
63541 agththtaaat thtatcttat aaththttcta tghtthttat cgagththaaa gacaatctth  
63601 gaaacacaaa aagcaagaaa atthtaaaata aaattaggca tagtatggac taaaaattha  
63661 agtatataat aagcgtcaag gtaaagatag tctthattca tctcctaaaa gttccttgac  
63721 aagththtaag atatcttctt cctcgatagt gcttatgcaa aagtcactth tatcaagatg  
63781 thttgctgtt gtgaththtt tgcctgtatc gataaththt ttgatathth tthtaaggc  
63841 attgctgggtg cttgggtgtg cgccaaagat agttatagaa ggcctathth gagcaaaggc  
63901 tagatgggtt gggccactat catttctat gatcaaatc atagaththt taaaaactat  
63961 aagctcttca aggctaaatt taggggctat thctatattg tcttgactta tggcgcctag  
64021 ctctatgact tctthtgcaa atthcatattc thtaacattg cccagccta agaaaattht  
64081 taththcagga aathctthga tgatcagctt gcaaagtaag gcaagththg thttaggata  
64141 gaththatth thctcacttg atcctacatg aatgagtata thththttat thtttgcaag  
64201 ttgcaathth thgattaaga gthgtththg ththctatct aactaaaaa catcttctt  
64261 aaaagctaaa thctthaggat caaaatatht atthagggtg aaagaagcta ggcttaggta  
64321 thttacaaaa acaththctat tataatcaat gththathth ttgthtgaat aathatgctg  
64381 aaagctthct thtaaggctat ththtatcaa accaaaatta thctactta aathctact  
64441 tacaagagct gaththtcaa gthcttgtag atccataac gcattgtagt ththththct  
64501 agctththaaa agtaththta aactthgaac gathththth thctththaaag gcaaggcata  
64561 aagththtctg atthaggat gathththgag tatacctthca aathththct ccaaaaacca  
64621 atgaaththct atatctthth taaaththth gataaathgt aaaaccacag cactthggat  
64681 aatatctcca agagccgata aacgaatgat tgctaththc atthaaaacct aaaaththta  
64741 aaththtgct atgaththth caaaaththt tgaaaaaagg thaaataatg atgaaaaatg  
64801 aaggttatat ttgcatthth gaththgcaa gcattccaga tacggathth atthctgtaaaa  
64861 cththggctth tgaaggagag gaththagaag taagctthaa agcgtthgag tggcaaaaag  
64921 agcaaagcgg aathgagtht thaccctthg cthtatcata gatcgtaaagc atthgtgcag  
64981 thattagthga thcaththga aaththataa aagthaaata aatcgatgga gaaaatgaaa  
65041 aagaaatgat ccataathth ththgctthca thgaaaaata cgagccaaaa thggtcagct  
65101 thaatgthta gaathatgat atgcctthac thgtctthag agctththaaa thacaatatca  
65161 aagcagcaa thacctthgat acgcaaagcg ataaatgthaa thattataaa actagathth  
65221 ctgaaththaa acaththgtat thaththgaaa gththggctc gacaaggggt thaaagctcg  
65281 atacgaththg cgccatggca gaththaccag gthaaatcga thgtacatggt gatgaggthga  
65341 tgaagctthta thtatgaagat aagaththaaa aathctatga gtaththgcaa agtgatgtht  
65401 thaaactthta thtgctthth thaaaatcag agththgathaa gggcaatgtg agcgtatgagg  
65461 atthtgctth ththththaaat thctatgagth aathththaaa agcaaaaaaa gcaaatcgtg  
65521 cctatgthgga aaththththg aaagctthg aaathgaaat thctthaaatg aaaaththaat  
65581 cgththaaata aathatathaa aaththgathth thathththaaa thctcgaggt aaaaathgaa  
65641 aathctthatt agthgthgthg cagththacat cggatctcat actththaggc agthththaaa  
65701 aacaaatcat gaaaththgct ththtagata thctthcthaag gththcthaaaa thgtatthga  
65761 thgaththgcaa aathataagag aaththaaath ththgagcaa gaththaaagth atththgaagg  
65821 cgthaaaagca cthththgaaa gggaaaaath thgatcagthg thgtcaththg cagcagthgat  
65881 thgaagthgth gaaagcatgc aathctctth aathatathat atgaaataca caathcaatc  
65941 aacaththta atccaaacth gthctcaaac agggthgagth aathththct thctctctac  
66001 agcggctact ththgggagc caaacactcc thgtthgthagc gagagthgthc ththtagcgc  
66061 ththaatctt ththggagcga gcaagctthat gaththgagag gthththgctg atgcaaatat  
66121 ggctcatctt gaaththaaat actgcattht aagaththth aathththgctg gcgctthgat



66181 ggattataaa ttaggacaac gctatcctaa agcgacttta cttatcaaag tagccgcaga  
66241 atgtgcagca ggaaaacgcg acaagctttt tatatttggt gatgattatg atacaaaaga  
66301 tggacttgtg ataagagatt ttatccatgt agatgatatt tcaagtgtc atttggcggc  
66361 attggattat ctagaaaata atgaaagcaa ttttttaat gtaggctatg gtcattggtt  
66421 tagtgtaaaa gaggttattg atgcatgaa aagagtaagt ggggtggatt ttaaagtcga  
66481 gcttgcccca cgccgcgcag gcatccttc agttttgatt tctgatgcaa gcaaaattag  
66541 aatcttact tcttggcagc ctaaatttga tgatttggat cttatttgca aatctgcatt  
66601 tgattgggaa aagcagtgc taaaaaata ttttttatt taagcaaaga ggataaaaaa  
66661 tttttattct ctttgttgct tttttcggtt tttatttctt ttatagaaag ttttgctatt  
66721 tctttagtga tgccttttat cactttggct agtgattttt cttattttga taaaaataag  
66781 ttttaattcc agcttaaaga ctatcttgct ttacctgttt ttgagattat agtttatttt  
66841 ggcgtggtgc ttattatctt ttatgttttg cgtgctttgt taaatagtta ttattttcac  
66901 ctcttagccc gcttttcaaa gggtaggtat catgctatcg cttataaagt ttttgcaaaa  
66961 tttttaaata cagattatga aaattttact caaaaaaatc aatccgaaat tctaaagtct  
67021 atcaccggag aagtttaca tctaagcacc atgatttcat ctttttgct gatgatgagc  
67081 gaaatttttg tcgtgctttt gctttatact cttatgcttt tagtaaatta taaaatcact  
67141 ttatttttaa gtctttttat gattataaat gcttttattt tgatcaaagt tcttagtctt  
67201 atcgttaaaa aagcaggtct taaacgcgag gaagcagatga agaatttttt tgaatttctt  
67261 aatacaaat taataattt taaattaata aagctcaaaa ctaaagaaga tgggtgtttta  
67321 aatcttttta aaactcaaag tgagatcttt gctagggcaa atatcaccaa tgaagtgta  
67381 agcgctatgc caagaattta tcttgaagga gttggatttt gcgtacttgt tttcatagtg  
67441 gtttttttag ttttaaaaa tcaaagtgat atatctggaa ttttagcgac tatctctatc  
67501 tttgttttag cgctttatcg tttgatgcca agtgcaaatc gtatcattac aagctatcat  
67561 gatttgcttt attatcgctc ttctttggat attatttatc aaattttaaa gcaaaaagaa  
67621 gagagtttgg gcgaagaaaa aattgatttt gataaagaat taaggctaga aaatttaact  
67681 tttggataca aagataaaaa gaatttattt acttgtttaa atttaagcat aaaaaaggc  
67741 gaaaagatcg catttatagg agaaagtggc tgtggaaaaa gcactttagt agatataatc  
67801 ataggacttt taagtcctaa agagggtagg gtgcttcttg atgaaaatga gctaaatag  
67861 aaaaatgtta agaattatcg ccaaaaaata ggttatatcc cgcaaatat ctatcttttt  
67921 aacgacagca ttgctaaaaa tatcagcttt ggagatgagg tagatgaaga aaagcttcaa  
67981 agagtgatca aacaagctaa tttagaacat tttgtgaaaa atttaccca aggagcgcaa  
68041 acaaaagtag gcgatggcgg gagtaattta agcgggtggac aaaagcaacg catagctatc  
68101 gcaagagctt tgtattttaga tcctgaaatt ctagtcttg atgaggctac ttccgcactt  
68161 gatacgaaa gtgaagcaag gattatggat gaaatttata agatttctaa agataaaacc  
68221 atgattatta tgcgcaccg tctttcaact atcacgcgtt gtgatagcat ctatcgttta  
68281 gaaaacggca aacttttcaa ggaggataaa aagtgaagat aacttttatc atagccactt  
68341 taaattcagg aggtgctgag cgtgttttag caactttagc aatgctactt tgtactcagc  
68401 atgaagtaag cattatcaaa tttcatgcgg gcgattcttt ttataaactt gaagaaaata  
68461 tcaaacttat aacttttagag caatttagat ttgacacttt gtatcataaa atcgcaagcc  
68521 gttttaaaaa atacctagca ttaagacgag ctttaaaaga aatgaaagc gatgttttta  
68581 tctctttttt agatacgaca aatatcgctt gtatttttgc caagataggc ttaaaaacc  
68641 cattaattat aagcgaacat agtaatgaag cttattttaa atccaaaatt tggcgtttct  
68701 taagacgctt gagttatcct ttttgcgatg ctttgagtgt gcttggagat agcgataaga  
68761 tttattatga aaaatttgta aaaagagtaa agcttttacc taatccttgt catttttagca  
68821 cagaaatttc tttaaatgag cttttgaaa aagaaaattt agtgctattt ataggtcgtt  
68881 tagatcaaaa caaaaacccc aaaatgtttt taaaagctat atcacattta gataaaaaat  
68941 tacaagaaaa ttatgaattt gttgtagctg gcgatggaga attaagacaa gagcttgaat  
69001 acaaagcaaa atcttttaggc gtaaaagtga aatttttagg gcgtgttgag aatgtaaaag  
69061 cgctctatga aaaagccaaa gtgctttgtc tttgctcttt tgtcgagggt ttgccaacgg  
69121 ttttgattga gagtttgtat tttgaagtgt gtagaatttc aacttcttat tataatggag  
69181 ctaaggactt aattagtgat agcgaggacg gatttttagt gggctgtgat gatgaaatag  
69241 ctttggctag aaagcttgaa cttgtattaa aagatgaaca actaagaaaa aacatcgtta  
69301 tgaatgcaa aaaaagatgt gaagattttg aaatttctca cattaaaaaa caatggcttg  
69361 agcttattga tgaggttaaa aatgcctaaa ctttctgtta tagttcctac ttttaatcgc

69421 tcttccttgc ttcaaaaggc agttcaaagt atcttaaadc aagactttaa agacttagaa  
69481 atcattataa gtgatgataa ttctagcgat gatactaaaa gtgtttaga gaatttgcaa  
69541 aaaagtgata aacgcattaa gtatTTTTta aatcaaaact acaaaacaagg ccctaattggc  
69601 aataaaaaaca atggttttaga taaggccagt ggagaattta taacctTTTT ggatgatgat  
69661 gatgagcttt taccctatgc cttgggctgtt ttaatgcaaa aagcaaatga gggttattct  
69721 catgtTTTTg gaaattgcct tatagaaaaa gaaggaattt taagcgatga gtttagtggt  
69781 agaggTTTTg aaaaagaggg tgaattttct aagaaagatt ttttaatgca gcgTTTTtagt  
69841 ggggaatttt tttctgtttt taaggcttct ttgctcaaaa ataagcgttt taatgaggaa  
69901 ttttatggca atgaagccac gctttgggtg aatttatacg aagaaaaaag tttttatc  
69961 cataaagctt ttagaattta tcgtgttttt agaaaagata gcgttacact aggagcgagt  
70021 aaaaatgctc ataggggtga tttgggggtat ttagagcttg cgagaatttt agaaaatgag  
70081 ttaaaagctt ctggggatga tgattatagg aaaacttgtg cgagttatta taaaatggca  
70141 gcttattatg caaaattaag tgcaaatat aaagcacttt atcattgttt attcaaaagt  
70201 ttgagtatta aatcaatac tcctgctttg atattactta ctttaagtat aattccaaat  
70261 aaaatgattg aaaaactatc aaaaattcgg gtggctttat gcaaaaatta gcgattttta  
70321 tttattcttt aggaagcggg ggtgctgaaa gagtggtggc aactttactt ccgattttta  
70381 gtttgaaatt tgaagtgcac ttaattttta tgaatgataa aatttcttat gaaatttctg  
70441 aatgcaaaat ccatttttta gagcgttcaa aacctagtga aaatcctatt ttaaaatttt  
70501 taaaacttcc ttttttgct ttaaaatata aaaagctttg ccaaaaatta aatatcgata  
70561 cggaatttgt ttttttaaat aggcctaatt atatcgcat gatggcaaaa atatttgga  
70621 ataaaactcg ctttgaatc aacgaatgta ccactccaag cgtgatgtat gctaaaaaca  
70681 atttcaattc tttagccaat aagcttttga tttctttgct ttatccaaaa gctgatttga  
70741 ttttgcctaa ttctaaagga aattttagaag atttattgtg caatttttaa atcaacaag  
70801 caaagtgtga aattttatac aatgccatag atttggaaaa aatagagcaa aaagcacttg  
70861 aagatataag tttaaaagat aaatttattt taagcgtggg aaggcttgat gagggtaaaa  
70921 atcacgcctt gcttatccgt gcttatgcga gattaaaaac agatttaaag cttgtgattt  
70981 tgggtgaagg tgtgctaaaa gatgagcttt tagctttgat taaagactta aatttggag  
71041 ataaggTTTT gcttttaggc tttgataata atccttataa atacatgtct aaatgtgaat  
71101 tttttgcttt tgcttctgta tttgagggtt tttcaaatgt tttaatcgaa agtctagcct  
71161 gtggctgtgc agtagtttgt accgatcata gaagtggcgc aagagagctt tttggagacg  
71221 atgagtttgg acttttggtg gaagtaaata atgaaaattc tatgtttatg ggcttaaaaa  
71281 caatgcttga ggatgaaaat ttaagaaaag cttacaaaaa aaaggcaaag gatagagctc  
71341 ttgattttga taaggtaaaa atagcacgca atgctttaaa atatttatta ggataaaaata  
71401 tgttaaaaaa agaatacttt aaaaaccaa cttttatttt atttgctttt ataattttgg  
71461 cgtatacctt tagtgtttta ttaggttttt attggatttt ttgggcaagt gaatttaatg  
71521 aatatttttt caataatgaa cttatgatta tctccaatga tggatatgct tttgcagaag  
71581 gtgcaagaga tatgatagcg ggttttcatc agcctaataa tttgagttat tatggttcct  
71641 cgctttcaac gcttacatat tggttttata aaataacccc cttttcttta gaaagcattt  
71701 ttatatatat cagtactttt ttatcttctt tgggtggttat acctttgatt ttaattgcta  
71761 atgaatataa acgtccttta atgggatttg ttgcagcatt gctagccagt atagccaata  
71821 gttattataa tcgcacgatg agcggatatt atgatactga tatgcttggt atagttcttg  
71881 cgatgatgat agttttcttt atgataagac tgattttaag aaaagattta ttgtccttga  
71941 tagcgcctgc tttgtttgta ggaatttatc tttggtggta tccatcaagc tatactttta  
72001 atgttgctct gctaggactt ttatttatct ataccttggg ttttcatata aaagaaaaaa  
72061 cgctttatat ggctattatc cttagcttcta tcacgctttc aatatagct tggttttatc  
72121 aaagcgtat cattgtcata ctttttagtc tttttgtttt gcaaaaataag cgttttagct  
72181 ttgctttgct tgggattttta ggtttggcaa ctttgggtatt tttgatacta agtggcgggg  
72241 ttgatcctat actttatcag cttaaatttt atatttttag aagcgatgag agtgcgaatt  
72301 tagcccaagg ttttatgtat tttaatgtaa atcaaaccat acaagaagta gaaagtatag  
72361 atttgagtat ttttatgcaa aggattatg gaagtgtcct tgtatttttt atatctttag  
72421 ttggttttgt tttacttggt ggaaaacata aaagcatgat ttttagcttta ccgatgttag  
72481 cttaggatt ttttagcactt aagagcgggc ttcgttttac ttttatgca gtacctgttt  
72541 tagcacttgg atttggtttt ttaatgagcc ttttacaaga aagaaagcaa aaaaacaata  
72601 ataccttttg gtgggccaat ataggagtct ttatattgac ttttttaagc ttaattccta

72661 tgttctatca tatcaacaat tacaaagcgc cgacagtttt ttctcaaagt gaggctacga  
72721 aattagatga acttaaagaa attgcacaaa gagaagatta tgtggttagct tgggtgggatt  
72781 atggatatcc tattaggtat tacagcgatg ttaagacttt ggccgatggg ggtaagcatt  
72841 taggcaagga taatTTTTTt ccatcttttg ccttaagtaa agatcaagta gctgctgcaa  
72901 atatggcaag acttagtgta gaatacacag aaaaaagttt ttatgctgct ccaaatgata  
72961 ttttaaaaaa tgatctttta caagccatga tgaagatta taatcaaaat aatgtggatt  
73021 tgttttttagc ttcgctttcc aaacctgatt ttaaaatcaa tacaccaaaa acacgtgata  
73081 tatatatTTA tatgccagct agaatgtcct tgatTTTtct aaccgtggct agTTTTtctt  
73141 ttgtggattt agatacaggt gagataagca aacTTTTtac ttttagcgcg gcttatccac  
73201 ttgatgttaa aatggagaa atttatctta gcaatggcat tgtattaaac gatgatttta  
73261 gaagttttaa aataaataac agtactatat ctgtaaatac catcatagag attaattcta  
73321 tcaagcaagg tgaatataaa attactccta ttgataatac ggctcaattt tatattttct  
73381 atcttaaaga tagcaccata ccttatgctc agtttatttt aatggataaa accatgttta  
73441 acagtgccta tgtgcaaagT tttttccttg gaaattatga taaaaatttg tatgatttag  
73501 tgattaatgc tagagatgca aaagttttta aactcaaaat ttaaaggttt ttacaatgag  
73561 agtaggcttt ttaactcatg caggagcaag catatatcat tttagattgc ctataattaa  
73621 agctttgatt gcaagaggag atgaggtttt tgtcatagtc ccacaagatg aatataccga  
73681 aaaattaaag gctttaaatt taaatatcgt tgtttatgag ctttcaagag cgagtttaaa  
73741 tcctttaatt gtttttaaaa attttttaca tcttaaaaat gtttttaaaa gcttaaatTT  
73801 ggatcttttg caaagtgggg cgcataaaaag caataccttt ggcttaatgg ctgcaaaatg  
73861 tgccaaaatt cttataaaaa ttgggcttTgt cgaaggactt ggatcttttt atatagagaa  
73921 gggcttttaa gcaaatTTtag tgcgTTTTgt tatcaatact ctttataaac ttagcttttaa  
73981 aatcgctgat tctttcatct ttgtaaatca agctaatacg gattttatgc aaaatttagg  
74041 acttaaggaa aataaaattt gcgtgattaa atctgtgggc attaatctta aaaaattcct  
74101 tcctatgagg gtaaatacaag aaacaaaaaa agctTTTTtg caaaatttaa aaattgatga  
74161 aaaacctatt gttttgatga tagctagggc tttgtggcat aaaggtgtaa aagaatttta  
74221 tgaagtgca gagcatttaa aagatagagc aaattttgtt ttagtaggcg gaagggatga  
74281 taatccctct tgtgcaagtt tggaaatttt aaattcaggc aaggTTTTtt atttgggtgc  
74341 tagaagcgat attgtagaac ttttgcaaaa ttgtgatac tttgttttac ccagttataa  
74401 agagggattt ccagtaagtT ttttagaggc gaaagcttTgt ggcaaagcta ttgtagtaag  
74461 tgattgtgag ggttTgtTgt aggcaatttc aaatgcttat gatgggcttt gggctaaaac  
74521 taaagatagt aaagatttaa gcaaaaaaat acaagtttta ttagaggatg aaagcttaag  
74581 aatcaatcta ggcaaaaatg cagccaagga tgccttgcaa tatgatgaaa atgttatcgc  
74641 acagcgttat ttagaacttt atgataaggt gattaaaaat gtatgaaaaa tggataaaaa  
74701 gaattttaga ttttattttg gctttgtttc ttttggTgtc tttttcgcct cttatttttaa  
74761 tcaactgcctt acttttaaaa ataactcaag gtagcgtgat ttttactcaa aatcgTccag  
74821 gtttaaataga aaaaattttt aaaatttata aatttaaaac aatgagtgat gaaagagatg  
74881 aaaagggTga gcttttaagt gatgaattgc gtttaaaagc ttttgggaaa attgttagaa  
74941 gtttaagttt agatgaactt ttacagcttt ttaatgtatt aaaggtgat atgagttttg  
75001 tggggccaag accccttttg gtagaatacc tacccttta taacgaagag caaaaactcc  
75061 gtcacaaagt gcgtcctggt atcacaggat gggcgcaggt aaatggtaga aatgcgattt  
75121 cttggcaaaa aaaatttgaa cttgatgtgt attatgtaa aatatTTtct tttttgtTgg  
75181 atttaaaaat tatattctta acagccttaa aggttttaaa aagaagcgga gtaagcaaag  
75241 aagggcatgt tacaacggag aaattcaatg gcaagaactg aaaaaattta catttatggc  
75301 gcgagtgTgac atgggctTgt ttgtgctgat gtagccatga gtttgggtta tgaagaatgt  
75361 gtttttttag acgattctaa gggtaaaaaa tttgaaagtt ctttgccaaa atacgatatt  
75421 tttatagcca ttggaaataa tgaataaga aaaaagcttt tTcatcaaat tTcaciaaagT  
75481 ggctttaaga ttgtaaactt tatccataaa agtgcgatta ttagccaaag tgcggatata  
75541 gcagaagatg caggaatttt aataatgcct tatgtagtgg taaatgcaaa ggcaaaaatc  
75601 gaaaaaggtg tgattttaaa tacttcaagt gtgattgagc atgagtgtgt ggtgggGcag  
75661 ttttcccata taagcgtTgg tgctaagtgt gcaggaaatg tcaaaattgg caaaaattgt  
75721 tttttagTga ttagttctTg tgttttgccg aatttaagtt tggcagatga tagtatttta  
75781 gggggTgggg cgactttagt gaaaagtcaa agtgaaaagg gtgtttttgt aggagtgcct  
75841 gcaaaaagga tgtaaacgag ttttaagcat atttgtTga ttatatagca agtccttTgc

75901 ctttggggtg gattgttata aatttactaa ctatatgttt agtatgttac atatttgctt  
75961 taaaaaattc tctcaaacat aaaatacttt ttaaacttaa agtgaattta aagtttaact  
76021 ccagcaagct tgtaaaatat accggcattg ctatgttttt ttggtggatc aataggaatt  
76081 tgggtgaatt ttttaagactt ttatcaactt cttttttttg agttagaaca taaaaattca  
76141 aaagtgcctt ggagtttaca gatatcggtt tcttttatga aagggtatat ttttattgct  
76201 ttttttctat tgtaaattta atggtaattt gcgaagatgg aatttatggt tgggtcaattt  
76261 aatctttttt atatgcattt tgtaaaatga gaagatttag aaattgacaa aacaataaaa  
76321 tttgattatt ttgcaaaaa gaggtattca ttcttattgt aaaaactaaa tataaaaaaa  
76381 tgatatgttt tgaaagtatg tataaaaaag aagacttaga aaaactcaaa atttggtata  
76441 aaaataaact ttgattgcaa aaagaatttt agcgtttgat acttagtaaa ttattttaga  
76501 taaaatacat catttttagta aaatcacttt ttataataaa ggataaaaaa tgagggtttt  
76561 tctttctcct ccgcatatgg gtggcaatga gttaaaatat atagaagaag tatttaaaag  
76621 caattatata gctcctttgg gtgaatttgt aaatcgtttt gaagaaagtg ttaaagatta  
76681 cgctcaatgc gaaaatgctt tggcgctaaa ttcagctacg gctgctttgc acttggcttt  
76741 aagagtagca ggagtggagc aagatgatat tgttttagct tcatctttta cttttattgc  
76801 ttcagttgct cctatttgtt atctcaaggc aaaacctgtt tttatcgatt gtgatgagat  
76861 ttttaatatatt gatgttgatt tattaagct tgctattaaa gagagtgaga aaaaaccaa  
76921 ggctttgatt ttaactcatc tttatggcaa tgcggccaaa atggatgaga ttgtccaaat  
76981 ttgcgaaaa gaaaatatta ttttaatcga agatgctgcc gaggctttgg gaagttttta  
77041 caagggtagg gctttaggaa cttttggaga atttggagct tattcttata atggaaataa  
77101 aatcattacc acttcaggcg gtggtagct tataggtaaa gataagcaaa aaatcgaaag  
77161 agcaagattt tatagtactc aagcaaggga aaattgttta cattatgagc atttagatta  
77221 tggctataat tatcgcttaa gcaatgtttt aggcgctatt ggtgtagcgc aaatggaagt  
77281 tttggaacaa agagtactta aaaaaagaga aatttatgag tggataaaag aatttttagg  
77341 tgatagtttt gtctttctag atgagcttga aaattcaaga agcaatcgct ggctaagcac  
77401 agctttaatt gattttgata aaaacgagct taattcttgc caaaaatgta tagaaatttc  
77461 acaaaaagac ttgattttac atccaaaaat ttcaaaactt atagcagatt tgcaaaaaga  
77521 gcaaatgaa acacgcccgc tttggaaagc tatgcatggt caagaggttt tcaaagggtgc  
77581 caaggcttat ataaatggca atagtgagtt attctttaaa aaagggatat gtttgccaag  
77641 tggtagca atgagtaaag acaatgtgcg tgaaatttca gaacttatta tcaagagcat  
77701 aaaggcttga tgatggattt ttataaaagt aaaaggctga tttttttctt atgttttgat  
77761 gcatttttat ttatgctctc tatattttta gctttttctt tgcgtttttag tggggaaatt  
77821 cctagtattt tttatgaggg tatgattaaa gcggggctta ttttactggt tttaaaaata  
77881 gcttttttat ttatttttag gatttataag gtagcatggc ggtttttttc tctaagtga  
77941 gcgagaaaa tttttttgct tttggcttta gctgaaattt gttttttggt gattttttat  
78001 ttttatgatg attttttcaa ccctttcca cgttcggtta taggtattga tcttattctt  
78061 tcttatatgt ttgtgggcac ttttaagaatt tctaaaagaa tgctttaga ctttaagcct  
78121 tcccgtgcaa aagaagaaga aactccttgt atagtagtgg gtgctacttc aaaggccttg  
78181 catttattaa aaggggcaaa ggaaggttct ttaggacttt ttctgtggg tgttgggat  
78241 gctagaagag agcttatagg aacatattgt gataaattta ttgttgaaga taaaagtaaa  
78301 ataaaagatt atgttgatga aggcattaaa accgctatta tagctttaaa attgatcaa  
78361 gccgagctta aggctttggt tgaagagctt attgcttatg gaatcagtga tghtaagatc  
78421 ttttctttta caagaaatga agcaagagat attagcatag aagatctact tgctagaaaa  
78481 ccaaagatt tagatgatag tgctgtagct tcatttttaa aagataaagt ggttttagta  
78541 agtggcgcag gtggaactat aggaagtgag ctttgtaagc agtgtattaa atttggtgca  
78601 aaacatctta taatgcttga tcatagtga tataatcttt ataaaatcaa tgaagattta  
78661 agtttatata aagaaaaaat taccctgtt ttgcttagta ttttagatga gcaagttta  
78721 gatgagatta tcaaggagta taagcctgaa ttgatcttgc atgcagctgc ttataagcat  
78781 gtgcctctt gcgagcaaaa tccgattct gctgtgctta ataatatcat aggaactaaa  
78841 attttatgtg atgtagctaa aaaaaataaa gtcaagaaat ttgtcatgat aagcacagat  
78901 aaggcgggtgc gtccaacaaa tatcatggga tgtactaaaa gggtagtga gctttatact  
78961 ttaaattcta gtgatgaaaa ttttgaagtt tcttgtgtgc gctttgaaa tgttttagga  
79021 tcaagtggaa gcgtgatacc taaattttaa gcacaaattg caaataacga gccattaacc  
79081 ttaactcatc ctgatatagt gcgttatttt atgttggtaa gtgaagcgggt gcagcttgtt

79141 ttgcaagctg gagctatcgc aaaagggggc gagctttttg tgttagatat gggtgagccg  
79201 gttaagatta tggatttggc taaaaaaatg cttattttat ccaaccgaga agatttagag  
79261 ataaaaatta caggtttaag acgcggagaa aagctttttg aagaattgct aatcgatgag  
79321 aatgatgcaa agacagaata tgagagtatt tttgttgcta aaaatgaaaa gatggatgtg  
79381 caaattttaa atgactatat taaaaaattg caagattgtc aaaatgtagc cgaaatttta  
79441 aaagaaatag ttcctgaatt taatcataat aaagatggta attaataata ttttaataata  
79501 tattaagttt tgattttact gaaattcttt atgaaatfff agaataaaaa attaaaaaac  
79561 aatcattttt ataaaaaaaa ttaaacaaaa atatagtaaa aaatgctata attcgctttt  
79621 aaaatftttt agaaacttga ttaataaggc taaaaaggat acaatatata aaatftatga  
79681 aaatfttgaa aggacgaaat tgtgaaattg ttagttgttg atgacagttc tactatgaga  
79741 aggattataa aaaataccct aacaagactt gggcataatg atgttcttga agccgaacat  
79801 ggagttgaag cttgggattt gcttgaaaaa aatgaagata ttaaaattct aattactgat  
79861 tggaatatgc ctgagatgaa tggcttagag cttgttaaaa aagtaagagc agaaaaaaa  
79921 tatgaagata tgcctattat tatggttacc actgaagggg gtaaggctga ggtgattact  
79981 gctttaaaag caggggtaaa caattatata gttaagcctt ttactccaca agtattaaaa  
80041 gaaaaacttg aagatgtctt aggtaccggc aacggagact ctgaggctga gtaatfttta  
80101 ataattaatg caaaaatftt attatgaact gtttcttgaa attcaagagc agtataaaaa  
80161 tttatftctt gatftttgtt tcgatfttggg cgtagacgct atagaagaaa aaggcaatgg  
80221 tatttacata cgctcggag agaatfttga agagcttgct tgggcgattg aaatftttgc  
80281 ccaaaaactg agtcaaaaat tcaatfttaa agaaaatatt ctccttcgca aaagtatcga  
80341 aaaaaagaa aataaagact ggggtggaaga gtataaaaaa ggaataaaac ctatfttaat  
80401 tgataatatt tatattcata ccacttggca agaagaaaaa gaaaattatc tcaatattaa  
80461 aattaatccc gctctagcct ttggttctgg gcatcatgaa agcacttatg gttgtgtaaa  
80521 atttctacia aaatftgcta aaaataatft gagatctfta gatataaggct gtggaagcgg  
80581 tattftggct attgttatgg caaaatftag atgtgaggtt gaaatfttgc atactgatga  
80641 tfttagccatt aaaagtgcft tagagaatgc aaagttgaat aatgtaaat tcgcacaagc  
80701 ttggcatggg tctgtggata aggcagaggg gttatatgat ttagtagttg caaatataat  
80761 tgccgatgtg atfttgattt tagaaaaaga tattaaaaaa catttagaag ataatgctat  
80821 acttatctta tctggaatft tggataagta taaaacaaga ataaaagaaa aatftcagga  
80881 tfttagagctt attgatgaaa tgcaaatcaa tgaatgggtc tctftggtat ataaaaataa  
80941 aataaaggaa aatgatgaa taataacaac aatgctccta ataataaggg taatccgcag  
81001 ggcaataatt tftttaacia gaatccaatt tftatftttg cgatftttgc tattgttatg  
81061 ataattgtct ttaagggftt tfttgatggg aatggatctt taggtgggtc tftaaatgga  
81121 accgaggtta gtaaaaatgt acctatftct gaatftaaaa aactftattga aagcggctca  
81181 atcaatcaag tgagcatagg acaaactact ataaaagcag tftctagtgc tcaaaatcag  
81241 gtttatacaa ccaaaaaggt tagcgatcca gatfttftgaa gcttgcfttga tagtaagaat  
81301 attgcttatg gagcttatft tgaacaaat tggfttacag atatfttftt tctftgggtt  
81361 ttgctgtat tftatfttctt tggaaatftg atgftftftg caagtcgtat gcaaaaaaat  
81421 atgggaagtt ctatactggg tataggcagc tctaataaac tftgaaatft ggaaaaacca  
81481 aaagttaaat ttaatgatgt tgcgggtgta gaggaagcaa aagaggaagt taagaaata  
81541 gtagatfttt taaaatatcc agaaagatat atftaaactg gtgcaaaaat tcaaaaaggt  
81601 ftatftgctt taggacctcc aggtacagga aaaacattat tggcaaaagc agtggcagga  
81661 gaagctgatg tgccgftttt tagcgfttca ggttcatctt ftatagaaat gtttgttggg  
81721 gtgggtgctt ctcgtgtgag ggatftgftt gaaaatgcaa aaaaagaagc cccggctatc  
81781 atatftatcg atgaaatftga tgctataggt aagagtcgtg ctgcaagcgg tatgatgggt  
81841 ggtaatgatg aaagagaaca aaccttaaat cagctftftg ctgaaatftga tggftfttgg  
81901 actgaaagtt ctccagtgat tgtftftagcg gctactaata gacctgaggt tfttagatgca  
81961 gctctfttaa gaccaggaag atfttgatcgt caagtgttgg ftgataaac tgatftftaa  
82021 ggtagatgcg acatftftaa agtgcataatg aaagatftta aaatftctcc aaaggtftaa  
82081 gtagaagata tagcgcgftt aaccgcagga cttgcaggag ctgatcttgc aaatattatc  
82141 aacgaagcag cactftftagc gggcagggat tcaaaaaaat atgtagaaca aaatgatctt  
82201 gtagaagctg ftgaaagagc tatagctgga cttgaaaaga aatcgcgtcg tattaacgat  
82261 aaagagaaaa aaatcgttac ftatcatgaa tgtggacatg cfttaatftg tgaaactaca  
82321 aagggtgcaa aacgtgfttag taaggtftct gtaatftccta gaggacttgc tgcacttggc

82381 tatacgctca acacacctga agaaaataaa tttttaatgc aaaagcatga gcttatcgct  
82441 gaagttgatg tacttttagg tgggcgtgct gcagaagaag tgtttatagg tgaatttct  
82501 accggtgcaa gcaatgacct tgaaagagca acagatatta tcaaggccat gatttcaatg  
82561 tatggtatga gtgaaattgc aggcttgatg gtgcttgaaa agcaaagaaa tactttctta  
82621 acagggggtc aaactataaa agattattcc gaaaaaatgg cagaatcttt agatgactat  
82681 gttaaaaaga ctttagatga gcgttataaa gatgttaaga ataccttaag tacctataag  
82741 ggtgcatcg aaactatggt tgcagcactt tatgaagaag aaactataga aggtgccaag  
82801 gtaagagata ttatcaaac ctatgaaaat gaaaacaatc ttcctacgag tttgcaagaa  
82861 ataaatgaag aacataaaga agaaagtaag caagcagagt aatgggaaaa tatattgcca  
82921 aagaaggaca ttggtttata gctatagttt ttatcttggt tgttatttgc tggatatttt  
82981 atagcttttc tgttcttctt tttttattat tattggtgct tttattttatt tttagaattc  
83041 caaatcgtgt aatagtttgc aacgatagta aggccatatt atcacctatt gatggtaggg  
83101 tgactaaaat agaaaatggt tttgataaat acttaggcga aagtgttgaa ataagcatta  
83161 agaatgcatt ttatgatgct ggggcctttt acactccttt taaaatggat attagcgata  
83221 ttgtgctaag acatggactt tttttatgca gtgaattaaa aagtgctaga atgatgaatg  
83281 aaaatgtaag catttttgca tcaagtgggt gatctaattg tgttttacgg atatatgcag  
83341 gctcttttga tagaaaattg aagcttgata atttatctca tagcttgaca gttggagata  
83401 aatggggtt tttaatcaat ggaactgtaa gtattttatt gccaagagat acacgaattc  
83461 atgtaggact tggagacgag ttaaaatcag gttctttatt aggctatcta gcttaaggat  
83521 aaaaaatgaa caataataaa tcacaattta tttatatattt acctaacttt tttacagcag  
83581 cctcagcatt tttgggtgta atttctattg ttgcttctat acagggtaat tattatatgg  
83641 ctttattgta tattattttt tctttaatat gcgatggtct tgatggctgt gtagcaaggc  
83701 ttacaaaaac cacttctaaa tttggtattg aatttgattc tttggctgat ttaatagcat  
83761 ttggggctgc accggctatc tttttttaca tggctattgg ttctgaatat ggaagatag  
83821 gctctttaat aacagccttt tttgttgctt ttggagcaat acgcctagca agatttaatg  
83881 tcactacagg aacttacgaa ccatctggtt ttataggact tcctatacct actgctgctg  
83941 tggtaaagtgc tatttggact tatagttact attattatga ttttttaaga gcctatggaa  
84001 tcattttttt aatcttacag gcggccttag gcttgtaaat ggttagcaat atacgctatc  
84061 ctacttttaa aaaattggat tttaatagat caagtgtttt aaagggtttg attatcttaa  
84121 ttattgtttt ttcttttttg tatctttatc cacttgaaag tctagtaatt ttagcaagtt  
84181 tatatgtgct ttatgggata gtaagagcga tttatactat tttttttct aaatttaaga  
84241 taaaatctta agtataaaat tgagctatag cttcacattc tgctttgcta aatccagctt  
84301 ttattcttgc ttgcatattg agtgttttgc ctgctaaaga gaattgatta aacattttac  
84361 aaatttctat aaaatcataa ttattttgat tagaaaattt ccaccagtta tctccttttc  
84421 ttacatgttt tgtttcatca ttttaagataa tgtgtaaaat atcttttaag aggcttttta  
84481 taggatgggt tgaactttca agttttgcca ctacaaaggg atttgcatca agtcccttgg  
84541 cttctaacc tctgtgtact actcccattc ttagatttaa acaatccttt gtagcttcaa  
84601 gtgcagcctc taaattatca tgaatggcaa aatcccata tttgtaatc agttcattta  
84661 atgctgcggt taaaagctta aaatgcttaa tttcttcac agcaacctct aaccaatcga  
84721 tataaaattg ttgaggcaga tttttaaaac gataacttgc atctaaggcc aaatttatag  
84781 cgctaaattc tatatgtgca atagaatgaa taatttttgc taaagaatga gtagaattta  
84841 caagtttagg gcgtcttata cgagtagggt gtaataattt caaattaggg ttaatatttg  
84901 tcttaaaaat acttccttgc tcatgattaa aaattaattt ttggctttta aaatcatcat  
84961 aaaatatggt aaatttttca aattttattat cagtgttttg ctcgtatagg attttttcaa  
85021 gttcgttaaa aaattccttt tgcattttac aatctttcta aaaatatatt tttgatttta  
85081 gtatataaag ctaaattttt ataacgattt actataaaaa tttttcaaac tgaagctttt  
85141 ttagaaaata atacattttg ataaaaataa aatttgctat aattctcaag tagtatttta  
85201 gaataattta gataaggaaa aaacatgaaa aaattaaacg aagaagaggc tagggttatt  
85261 ttaaataaag gcaactgaag tccttttagt ggtaaatata ataattttta cgaaaaaggg  
85321 atttatcttt gtaagcaatg tggatctaag ctttatagat ctgaggataa attcaagtca  
85381 gggtgcggat ggccaagctt tgatgatgaa attaaaggag ctgtaaaaag acttcctgat  
85441 aaagatggca ttcgcacgga aattgtatgt gctaattgag atggccattt aggtcatgtg  
85501 ttcgaaggag agggtttttc ggctaaaaat attagacatt gtgttaattc tatctcttta  
85561 gaatttgtaa aaggtgaata ataaatgttt tcaagtgtag gctctgagct ttatttaatg

85621 ttttttgcgg gcataacatt attagctgtg ttaaadcctt ttggtaattt aacgcaattt  
85681 ttagccatga gcgatggcct acctttaaca cttagaaaga aacttttttag aaccatactt  
85741 tatacagcat tggctatcgt gcttgctttt ttattttcag gacctttggt tatgaattat  
85801 attttttagag tttctttgga tgatttgagg gtttctggag gcttggtttt aattataatg  
85861 gcaatataaaa atttattatt ttcaaccaa ctcgcaactc aaagttttga ttcttatcaa  
85921 gaaatgaatg agaaagaaat tttacgtcaa agcttagtac ctatggcttt tccaatgctc  
85981 gtaggtcctg gaacttttagc tagtgtgata gtgatttcag aagacgggtg tttagatgtg  
86041 gcttttgggg gtgtgataat agcttttatt tttatgtttg cactttttca ttttgctgct  
86101 acaattgaaa gaattgttgg aaagcttatt ttgcatgttt tttctcgtat agctcaagtt  
86161 ttcatgttgg cgatgggatg taagatgatt ataatagggtg tgaagaatat atttaatatt  
86221 tgatgaagag caataaaaag ctgatataaa atataaatat cagcaaaaca gcgcaaaagg  
86281 atgttaaaaa ttatgtttga ttgatcaagg cgttaaaatt tgtaaatccg ctttcttgat  
86341 tacacttttc ttttaaaata tctaaaaata cttttctttc aatattttta gccccatga  
86401 attctaaatg tttgttatac acttgacaat ctatgataaa atcgtagggt ttaagaagct  
86461 cgaaaagttt gattagggct atttttgaag cattttttct aagacttacc atgctttctc  
86521 cgaaaaaac tttgcctata atcagtcctc aaattcctcc aatcaattct ttatcttcat  
86581 aaagttctaa agtatggaca tgtccttgct tgaacagctc atgataattt tctataaatt  
86641 catcatcaat ccaactttga gggcgtttag tgcgacatag atggataaga tttaaaaaat  
86701 cataatcaag tttgatttga taaagattga taaatttttt catatttttt tggatatgaa  
86761 tttcgttagg gtttaatatg catctaggat caggacacca ccaagtaacg ggtttgttag  
86821 tccatgaaa aagcccaaaa ttataggctt ttaagataaa attaggttcc agtttttgac  
86881 ttaaaaaaac ggggtcgtct ttaggcgat ctactagttt agaataaag gtcgagcttt  
86941 ccatttttgt tgagcttgat tttagctatt ccgccttttt tgagtttgcc aatagaatt  
87001 tcatcgctga ttttttctcc gatttcttcg gaaataatgc gttttaataa tcttactcca  
87061 aattctttat tgtaagcttt ttttgctagg tatagcttag ctttttcatc agcaactaat  
87121 tggatatttt taagattttt agaaatttcg tctaattctt tttgaatgat tttacaagt  
87181 acagcatcat ctagatcgtt aaaatgaaga attttatcaa tacgattgat aaattcaggc  
87241 gcaaaaaaat ctttgatagc acggttgctt ttttcttcat ttttacttaa gaatccaagc  
87301 tcattgcttt ctttaagtcc taaatttgaa gtcattatta taatggtatt tttaaagtca  
87361 gctttaaggc cactattgtc tgtaagctct gcattgtcaa agatttgcaa gaaagtatta  
87421 cttaaatcag ggtgagcttt ttctatctca tcaaaaagga taaggctgaa aggatttttt  
87481 cgaaccgat tgcttaaaag tcctccatct tcatatccaa catatcctgc aggagaacct  
87541 atgagtttgc ttatgctgtg cttttctgca tactcactca tatcaaaacg ttctaaattt  
87601 aagcctaaaa attctgctaa aaccttgcaa agttcagttt ttccaacccc gctagatcct  
87661 gtaaataaaa atactcctcg tggagtgttt aagttcttaa atcctgcaaa actttgtttt  
87721 aaggtcgcaa caagcttatc aataacttca tcttggccaa atatttttgc ttttaatta  
87781 agacttagat tcatcaaggc tttgttttga tcaaattcaa acattttatg atgatgagtc  
87841 attttggtc aaacttgttc taaatcttta atatcagcat ttttttttagc ttttgcgtta  
87901 agaacataag aggtccaag ttcatctatg agatctatag cgctatcagg aaggtattta  
87961 tactgaaaa atttcttgcc ccaaacaaca gcttgttgaa gtatttcatc actaaattta  
88021 atcttatgaa aatcctcgta tttgcttttc aagccttgca aaatttgaaa agcttcctct  
88081 tgacttggtt catctacatt gattttggca aaacgacggc ttaaagcttt gtttttatcg  
88141 aaagtatttt tatattccat gaaagtcggt gcacctatac attttaaagt gccattgctt  
88201 agagctggct tgagaagatt ggaaaaatct gtatgagatt ctccagttgc tccagctcca  
88261 actatggtat gaatttcatc tataaataaa atagcattag gaagtttttg aagtccttct  
88321 aagacttctt tgattcgttt ttcaaaatca ccgcgatact tagtccctga aagtagtctt  
88381 gctatatcta gactaaaaat ttttagcattt tgtagatttt ttggaacttt tttttcagca  
88441 atagctaatg caagtccttc gactatggca gtttttccaa cccagcttc tccgattaaa  
88501 ataggattgt tttttttacg tcttgataaa atttgcacga tgcgttcaag ctcaaatttt  
88561 ctccctatta aaggtctat tttacctttt tgcgctaaaa gcgttaaatc gcttgcgtag  
88621 gaatttaaat tttccatctc gctattttgt ttaaaatctt gaattttttc caaattcata  
88681 ccatgttttt gtaaaagaaa gctcgaatat gttctatcat cttggatgag tttttctaaa  
88741 aaatcgatga tttttatttc atttttatga tgaagaattt catctaaaac tatagaatta  
88801 acaggttcga tttcttgatc taagctttga tttttttctg ctatataatt ttttaagctca

88861 ctttctaaaa gttcaaattc agcatctgcg agctcttcaa atattgattt aaaatctgaa  
88921 cttagtttta atatagcaaa aagtacatgc tcacaagtta taaattcatg acgattgata  
88981 gtgcttaagt gtttagcatt atcaaggat ttttgtaaat tttcttgata tttcattcct  
89041 cttccactct agtttgtaaa ggaaaatttg ccaatttagc agcattagaa actttttttt  
89101 gctttgaaag cgcaatttct tgagtgtaaa ttccacaaac tccacttcca ttaagatgaa  
89161 cttctaacat aattttattg gcagtttcaa aatcatggta gaaaatattg attaaaattt  
89221 caataacaaa atccatcgtg gttacatcat catttaataa tataacctta aacatttttag  
89281 gctctttaag cttacttttt tctaatactt ttaacttttg cattattttt ctttataaat  
89341 tttattttaa tcatttttgta tgtaatctgt tggaatttta cctaaataaa aatttgttga  
89401 agtattatta tccaataat tgctaagttt ttgataaatt ccatttttca ttactacttt  
89461 aaagggtaat gtttccatgc tttgataaatt aatattccttt aaaatttgag caactatgcg  
89521 atcattttgt gaatcattgc ttaaaaaata ataagctcca taatcatcgg caaatttttt  
89581 aaccgtttca tcgcttacat tttcaaaatg tgttagtccc atgataataa atttatttga  
89641 gttgtttttc caaagtttac taagctctaa ggcttcttc ttacaagggg tgcaaaaagt  
89701 tccaaaaaaa tcaatcatta atactttatt ttcttcacc tcaacaataa agcctttatc  
89761 agtacgaatt agggcttag ctccccatt tacactattt aatacaattt tatcaccctt  
89821 attgtattct tcaaacatat aatcattttg tatacttctt tgggtcgcgagc aagcacttat  
89881 aaaaaaacct ataaagataa aaaatgacaa tattgctttt tttttcatac ccatccttta  
89941 tttgtagttt ttcatagcag atcttgcttc tatactgctt tgttttttct ttagactttc  
90001 tcgtttatcg ttagattttt ttccttttagc tagagctagc gtagctttga ctttattttt  
90061 atgattaaaa taaagatcca ataccactaa agtgtatcct tcgatactaa ctttacccaa  
90121 aagcttatct atttgcttgc ggtgcattaa aagttttcta gcggctcttt catcatgctt  
90181 atagtaagaa tgtgtagtat taagatgtga tatgtgagca tttagcaaaa ataattcacc  
90241 ctttaataata cgcacgaaag aatcttttaa atttgccctt ccagcacgca atgtacaac  
90301 ttactgcct tttaaaacca cccctgattc aaagcgttct ataattattt aatcaataa  
90361 agctttttta tttctagcaa tgattttcat tgatgcacct taaaaacact acttccgctt  
90421 ccacttagaa aaaaatcttg ttgtaaaaaa agaaacattt taggatataa agttacacaa  
90481 ggagtaaaata aatcattaag ttgggtattt ttaaagtgtt ctagaagttc ttttgtgttt  
90541 aaatttttgt aaatttttagc atcaagaatg cttttttcaa aattaatttc tcctttgtca  
90601 aattcatcat aaactttttt agtttgcaa gatacttcag gaaagatcca ttctaagctc  
90661 ggtatagtat cattaaattc ttctataatt tcaccgcatc cacttacatt agcactttca  
90721 aaaccactta agaaaaaagc aatatcactg cctagttgag tacttaattt tataagtttt  
90781 tgagtactta attttaagtt taattcttca ttaatcagca ttaaaaagct tgcacaatca  
90841 ctgctgcctc cccaagtcc tgcacatgtg ggaatatttt tgattaattt taggcttttg  
90901 gttttaaaaa attcttccaa ttcatttttg tagccatttt gacaaagtag ccaataggct  
90961 tttgtgatga tattgtcctc gcaattaaaa ttgctaataa tttcaaaacc tttaggagaa  
91021 tttagacttt tatcaacgat ataaatttca tcaaaaagat tttttaaaag tataaagcga  
91081 gattctaaaa gatgatatcg tcttttatca aatccgacaa gttttaaaaa aatatttgct  
91141 tttagcgtatg ctttcattgg atcaattttt tacttaagtc atctaattta acatcgtttt  
91201 ttactacaga atgtaaattt tcatctttga tttgagtaag gagctctttt cttaaaatca  
91261 ttagagattt tggagcatca atgcctattt tagcatatcc ttttccagtt tgaacgattt  
91321 taatttcaat tccttcacca ataacaatac tttcattttc ttttcgcat aatattaaca  
91381 tttttcaacc ttatttaaaa gatattctac tttattttct ttaatattta taatactaaa  
91441 atatttttca ttttctatat agtaaaagcc ctcatcttga aatttttaatt cttctaagga  
91501 tatttttagtg ccattttcaa gttttgttaa atctttaatg aaattaggct ttaaatttaa  
91561 atattctaac acatttaagc ttttttcgtg attataaaaa aaatctcct cgcggatgcg  
91621 ctcaagagaa cttaaagtag cattaatacc taatttttta gcaaaaagct cacaataaga  
91681 tcttatataa gtccttcgc taacgcttaa ttcaagttgt aaaaaagggt gagtataatg  
91741 tatgatttta caagagaaaa tttccattat acaagatttt aactcgacat tttcaccttt  
91801 tttggcaaat tcataagctc ttttgccttc tattcttttg gcgctaaatt gaggcggggt  
91861 gtaagaaact tttcctaaaa gttccatttt gatttgctct aagagtttga tatcaaaagc  
91921 ttttataggc tttatttctt gtatgttttt attatcaaga cttaaagatt taacccaag  
91981 ccaaagtgtt gctcgggatg tttttggagt tttttttaa aatctaaaaa gcttagtgta  
92041 ttgccccaaa gcaattatta aaactccttt agcaaaagga tctaaggttc ctgaatagcc



92101 tgctttttta tttttatata tttttttttat ctgccctaaa aaagcattag aactcatttc  
92161 tgcgggttta aaagcaacaa aaatttttatt catacggctt tttccacaaa acttgccata  
92221 ataatgcggt ctattccgcc aaaatttata gtaagttttt cttctttttgc actttttgttg  
92281 aactagtaa cgcgtcctat gccaaaaatt ttatgtttta ctagatctcc tttgtgatat  
92341 ccttgttcgg ttttacttac agagattttt tttgttaatt gactttcttc taaaaacga  
92401 ctagagtcta attccgtgcg acttcctcgg taaaaacgag atttcgcaat gcttagtgat  
92461 agacatthtt tagcacgagt gatagccaca tacgcaaggc gtctttcttc ttctatatcg  
92521 ctttcattta aaggaaaaaa tccttcttca agtcctacga taaatacatg atcaaattcc  
92581 aaacccttac tcgcatgcac actcataaga tatacacatt cggcctcaat cccatcttga  
92641 tcgcttagca gtgaaatttc acttaaaata tcttctaggg ttgttggtgg ttcttctttt  
92701 attttttctt taatgcttgc ataaaattca tcaatattta atacgcgctc atcgccatct  
92761 tcttgaagag cgtaaaattc ttttaagagca aaaagtctt caaatthttc aatcattttt  
92821 tttaaatcag aatattcttt aagtttgtaa atatthttgta tgaatthttt tgcctcattt  
92881 tgtgctthtt taagagaaaa aattcccaca ccgcatcgc tttcgcataa tgcttcaaag  
92941 agtgaatttt ttctthtttg cgcataatct tccaaattct gtaaagcttt ttcacctatg  
93001 cttcttttag gtctattgat aatgcgttta aaagataaat catcattagg gttgattaaa  
93061 attctaaaat agcaaatgag atctttgatt tcaagtcttt cataaaaacg cattccactt  
93121 agtaatttat aaggaatttt ttccttcata aaggcttctt ctatggatct tgaagagca  
93181 ttgatacгаа ataaaacagc aatttctcca gcataaatgc ccgaatttaa aagctctttg  
93241 atthtttttag ccaccaatgc gctttcgttt ttttcattat ccgaacttag aatttgaata  
93301 tcttcaccct catcttttgt gcaaagtagg gtttttccaa ggcgtthttt attgtgcat  
93361 attagattgt tagcagcttt taaaatcata cccacagaac gataatthtt ctccaattta  
93421 acaagthttta catttgaaaa ttcactttga aaatthaaaa tathttctat ttttgacca  
93481 cgccaactat aaatactttg atcatcatcg ctacaacac atatgthttc atgaatgcag  
93541 caaagatttt taagaatttt gtattgtaa gcattgggat cttgatattc atcgaccgtg  
93601 atataacgat aaaaagaact ttgctctttg gcgaaatttt gatcattttc taaaagagta  
93661 ttggtcaaaa gtaaaagatc atcaaatct acgaaattgt gtttgagtaa atattcttga  
93721 taatthttgat aataaatagc gattthtttgc aaggcttgat gtttgatttc attatctttt  
93781 agcaattcta gatcactaaa tacatcttga acgctthttg tttcattttt aaaatgcbag  
93841 ataagctгаа gaatthttgat agggctagtt ttatcatcat taatgagttc ttttagaatt  
93901 tttttagaat catcattgtc aatgataata aaatthtttt ttcttcccag tctttctata  
93961 tggagthttta aaaacaataa accaaattta tgaaaaagtc aaagtaaagg atthttcattg  
94021 ctattaagaa ggcttaaggc tctatthttc attacacttg cagctthttt tgtaaaggtt  
94081 agagtgaggg tattgatagc aggaattcca acctcccaa tcatataggc aagacgcgtt  
94141 gtgattgtht tggthtttacc actacctgca cccgcaagta taagcatagg gccatcgata  
94201 tggcttgagc cttctthttg actthttcatt aaacctgtaa ataaattcat tttttgaaaa  
94261 tgtctthttg ttttagggtg cttagaaga tathtttggga tthttgtgat tttgtattat  
94321 ctttgcttht ataaaagcta aagttaacaa acaaaacact atthttcaact tgaatthttgag  
94381 taattgctcc aagatctact ttaacatagc tagcaaaatc atcaggacca aaaccgcat  
94441 gaaattgtat atgattthtt tctaattгаа tggactcaaa agtatatcct ccaaggacaa  
94501 ataatgcaa aggattthtt ttgacatcca aatthttcagg taacacagga ttaaaatcaa  
94561 taaaatthtt attagccact atggaaaatt ctatathttc ttggattaag attgaaagta  
94621 agtcatagca atthtttttgc attaaagcaa taaaatthtt atthttctaga atthtttcta  
94681 tcattathtt agcctcataa attcatcgat aagthttttg atthtttatta tgcctatthc  
94741 ccaaaagctc ttatcttcta tatcaaatcc aaacattccc acaagthttt ttggactcac  
94801 gcttctcca agagaaagca tttttatgta aagctcttta aaatcgcbgc aagtattgct  
94861 tttgtaaagc ccataaagtg caagtactaa aagctgggca taagcataag catagcbgta  
94921 aaaaggacta tggataaaat gaggaatata actccaccaa agggcataat ttttactcaa  
94981 ttccagctt tcgccaacaa ttttttgaga ttcttccatc caaatthttg aaatthttc  
95041 actthtttagc tcattthttcat tagcatgaa gcgtctttca aaacaagtga aattaatctg  
95101 cctataaaga gtggcgaaaa tatcttcaat ttttgcbgca taaagtgcta ataattcttc  
95161 ttttttgagc ttatthttta cataatcaa taccaacatt tcagcaata ctgaagcbgt  
95221 ttcbagctgta gttaaaggag tathtttgatt taaaaaagaa aactataag aaagthtttg  
95281 atgtatggtg tgtcctaatt catgagcaag agtaaaaaga tcacgccttc catctgtata

95341 atttagcaag ataaaaggat gagtatctgg ggtagctgaa tgtgaaaaag caccactttg  
95401 ttttttatct tgtggataaa catctatcca acctttttca aatgcttctt ttgcaatatc  
95461 tccaaaaaca ggggaaaaat cataaaaagc atttagaatg atttttttac tttcttcaaa  
95521 actgaatfff gcttccttgc caatgggtgc ataacgatca taatctttaa gtttgttaaa  
95581 gcctaaaatt tgtttttttc ttttatagaa attagatacg aggtaaaaat gtttctgcgt  
95641 tgtttgaatc agcgaatcaa cactttgctg agtgatttga ttttgtaagt gccttggagt  
95701 ttctgcgctt tcatatccgc gtaatttgca aatattgctt aattctgttt tgatcatatt  
95761 gaaaataaaa gtgagcaaat ttaaattttt atcaagggtt ttggtaaatt ttttagcggc  
95821 ttttttctt atctttctgt cattattgta agtttgctt aaaatttctt cctcgctaag  
95881 cttattgcct tcgaaaggaa ttttaaatgc agccatgctt tcatcaaca atctactaaa  
95941 agcatttgct cctgtatttg aaagataaag cattacgcgt tcttcttttt ggcttagatt  
96001 gtagtgttta ttttgaatga gattttgtaa gtaaaaatca taacctttgc aaaattcaat  
96061 caattcttta gttttttctt cgctaagctc gcaaaattct agttcaaaaa ataataaatt  
96121 ttcttctatt tttttacatt cttgttcata tttagcataa aaagaaccct tagaactatc  
96181 tttagcaaaa cataaataag cataagtcac aatttttgaa agcattaat gcaaatgctc  
96241 gtattctttt agagcgttga gaaaatcatc agggtttaat ttatctaaag cagtagaata  
96301 attttttttg aattcttttag attgttgaat atagttttgt gttgtatttt ctaattcatc  
96361 ttcgttttta aacaatacct ctaagtccca agtcaacatg cttttccttc agttttctaa  
96421 gattaatfff tttaaaacag ccattctgat tgcaacgccg tttttaactt gttttaaaat  
96481 taaagctctt tcatcatcca tcacttcatc acttatatcg atatttctat gtacagggcc  
96541 aggatggagc aaaatgagtt ttttatcttt aatcaaatca agtttgatac aaaaatcatt  
96601 cgcataatct tttaaagagg cataaatgat tttattatgt ctttctgttt gcgttcttag  
96661 actcattata atatcggctt ttgagatcaa atcttcattt aaagaatagg attttttcaa  
96721 aggtgaatga ggcataaaat gaggtgggtgc tacaagggtg atatccaaac caaatcttgt  
96781 taaaagttca gtgtttgaag aggcaactct tgaattttta atatctccta caattaagat  
96841 ttttctacct ttaatatcac ctttaaaatg ctcataaatt gtaaaaagat caagtagagc  
96901 ttgagtaggg tgtgcatggt tgccatctcc gccatttaca acaggacaat gcatatgaga  
96961 agctaaaata tgaggcactc ctgaatttgc atgtcttact atgatagcat taggactcat  
97021 agcgtctaaa ttagccgctg tatcatagag tgtttcgctt ttactagagc tcgatcttga  
97081 aacatcaagg cgtaaaattc tagctcctaa tcttcttgcg gcactttcaa aggatgagag  
97141 tgtacgcgtg gaattttcaa agaatatcgt tghtaacactt ttgccttca gtaaggttct  
97201 aggtttttca tctaaaaaat ttcttgcttc ttcaaaaagc tccattattt catcattagt  
97261 aaaatctttt gttgtgatga gatgcctcat tgtatttacc ttatatcgta atttaactca  
97321 tctttagaac aaatagcact aaataacaca tctgttgagc tatttagcgc tgtttcaaca  
97381 ctatcttgta ctacgcctat gataaacctt attgcaacta ctttcatagc gatatcatag  
97441 tctatgttaa ataaagagca agccaaaggg atgagtaaaa gcgaaccgcc cgctacgcca  
97501 cttgcgccac aagctgcaaa agtagcgata atacttaata aaaaggcttg caaaaaactt  
97561 acttgatgac caacgctatg tgcggcgcta aggccttaata tagctatggt tactgctgca  
97621 cctgccatat ttatcgttgc tccaagaggg atggagatac tataaaattc tttattgatt  
97681 ccaagtttag cgcaaagtgc catatttaca ggaatatttg cagctgagct tcttgtaaaa  
97741 aaagcaaaaa aagcgtgtg tcttaagcag ataaaaatca aaggaaaagg attttttcta  
97801 gtataaatga aaacaattaa ggcattgatt acaaaaagcaa caaaaagcat agtaagcaca  
97861 agtaatacca agagttttgc atagcttaat aagccttgcg ctctgtttg cgccacagaa  
97921 ttagccacta aaccaaaaat tccaaaagga gcgagtttta ctataaattt aacaattttt  
97981 aaaaccctt cattgatatc tacaaaaatt tgttttgctt cttgcgagca atttttcaaa  
98041 gctataccac cgcctattgc ccacgctaaa attcctaaat aatttccact tgaagcgca  
98101 ttgataggat tatctactat atttaaaagt aaattcttaa aaatttcatt taaatgcata  
98161 ggagaagtat tttccgcttt ttgaactcct tctaagatta attctacagg aaacataaaa  
98221 cttgcaatca ccgcacatgc tgctgctaaa aaagttccta caatatataa aatgacaata  
98281 tttcttatct tagaactact ttgagaaaaa tctctcgtgc aaattgaagt tagaatgagt  
98341 ataaagacaa gaataggagc tatagctttt aaagcattgg taaataaaac tcctagcaag  
98401 ttgacaattt cggccatttc ttttagactt attcctacga gtatgcctag aattatacct  
98461 gcgcagattt gaaggattag actacctttg gcgtagcttt gaactagttt tgagaacata  
98521 agaaccttta ttattttgaa atttgatgca atattattgga cttgatttta acgaactttt

98581 gcttaatfff agtaaatfff ttaaagcatt aagcttgaat aaatffatff gagctagaat  
98641 tgtaactcat tttttatgaa aggactffff atgtatctat tcacttcaga agtcgtaagc  
98701 gcaggctcatc cagacaaatg tgctgatata atcgcctgata caatagtggga tatactcttg  
98761 aaaaatgaca aaaattcaag ggtggcgagt gaggtffffg tcgcaggaaa taaggttgtg  
98821 ataggaggag aagttaaattc aaatcacaag cttagtaaag ctgattacga taatftagtt  
98881 aaagatgfff tgaaaaatat aggctatgat ggagcaggat atftftagtaa agaacaatgt  
98941 ttgcatcctg atgaagtcga tgttatggta tftftaaatg agcaaagccc tgatattaat  
99001 caagggttag atcaagaaga tggcgaaaca ggtgctggag atcaaggat tatgftftggt  
99061 tttgcaagtt gcgaagctaa agagtatatg ccagcagcta taagftatgc gagagcgtt  
99121 tgcgataagg tttatactta tgcaaaagct catccacaag aactgggtgt agatattaaa  
99181 actcaagtga ctattgatta tggtaaaaag gcgaatftftg aaaattgcaa accacaaagt  
99241 attcatacta ttgtftfttc tgtgcctftgt gttgaaagta tgaaaataga ggatftaaga  
99301 gctftggtca ataaatftat cctagaaagt gatftacca aagaactftft taatcctgaa  
99361 aaaactagga tftftgatcaa tccaacagga aaatatgtca atcactctt tftgcatgat  
99421 agtggftftaa ccggaagaaa actftatagta gatagftftg ggggatacgc tcctatagga  
99481 ggggggtgcac aatctagcaa ggattatact aaggftgata gaagftggtct tftatgcaggt  
99541 agatggctftg ctaaaaatat agfttgcagca ggactftgcta aaaagtgtat agfttcaactc  
99601 agctatgcta taggtfttgc taaaccact tctgtaagcg tagatftftt aggaactaat  
99661 acaggagtaa atgatgatgt tftgagtgat tftgtaatgc aaaatftctc tftgacgcca  
99721 aattggattc gtgataaatt tggctftgat aaacctagca aagacactft tctftatgct  
99781 gatgtagcag ctcgcggaca agtaggacaa aaggatftatc cftgggaaaa actftatgct  
99841 gtggagcaat ttaagactftt aatftaataa gcctftgftft tcaaggctta tcatacttca  
99901 agatftgftft taatacaaaa ccaatftaac ccacaatftft atcaatggac tftatftagat  
99961 tgtaaaaagaa tatataggca aaagtatcca ggatacaagg tatgatagtc tatttctat  
100021 gaatatcaag aagataaaaa aagctftgftt gtaatagctg aaagaaaaga agacaagcga  
100081 tftatftaat acttaacaag agatftftaaa gatftftaaa cfttfgcaaaa agcaaaagat  
100141 aaagccaaag atftfttatct tgatagccaa atggfttaaaa atftcaaaaa aatgcaaggg  
100201 atatftaaaag gcttaattga taaaaataat tctftaagctt taatatctat gctftftggt  
100261 gcagaatftta aagaaagaat tftatftaat tctcttatat catcatcact aaatftcata  
100321 ccaaaaagaa gttctaactc atcgcfttftg ctaaatftft tftctagcag tftftftaaa  
100381 agctcattca tftftattatc atctftftgtag gftftctftftg tftftactftc tgctftgtata  
100441 ggtftftctct tftftftgcbc ctctftcaatt gctftftgtat catcaatagg cftftccagta  
100501 ggatattftat cataatctat gcctftftgcb tftftctgcbg cftfttaatft tftcaaaaac  
100561 tcatcgtgtc tftgftftaaa atcaagatat ttagftfttaa atftctftctaa actcatatta  
100621 gagftgatca tftctftgata tftctfttatct aaatctattg caagtctftga aagfttcagta  
100681 tftcctatgt tatcactftct tctaataaaa agctftcatag atagtcgctc tftcaaaagga  
100741 tftcattcat caggatftgct tgaatatgaa aaagcactftt gtatftftatt tgcattcata  
100801 aaactftgaa aagctftcacg ctcatcatcg ctaatgftftt tatcagftftg aatftftcca  
100861 aataatctftg tatcacctftc taaaagtaat gaagfttgcgc catagagftt agaatftaaa  
100921 agagctatta aaactcgcgc tftgftftata ctgcbatctt gtftaatata agcattctta  
100981 tftaatctta catcgcatt gctatggcta aaaatattgt caaactgat tftatcaaaag  
101041 ccaacatftg aaaaagtatt aaaagfttaaa tftaattctat cftgagfttaa atctatftftt  
101101 tcatactcat cftftftgtaa agftftftagta acatftaagat tftftatctaa aacaaaagca  
101161 taaggatftat tftgftaatgc tftctftcagaa agactagcat tftgaagfttgt cggcataatt  
101221 tgagaaaagca cftftataagc atfttctatft gftftftgcaa tatctattga agtftgagftt  
101281 gcataaaaaat atctatctcc agfttcccac tftcaaaaac tftcaacatc tfttagcatag  
101341 atftftataat cftftftgcaa tcttgcagct tgcfttaaaaat cactftgtgaa aaatcctatc  
101401 tftatctacac cataacctaa gatftftatct atcgcfttftg atfttatcact tacaagftta  
101461 tftatftgcta tgacattaga tftatftftgta tftgagfttat tftftftgfta atftgtagftt  
101521 gaataagaat tftataccatt aatcattftftt gcctftcctgt aagftaaagft tftatftataa  
101581 gataaatcgg caaaaatgat tftftatftaa gcaaaaatta tactftaatga ggaatftftg  
101641 ctgfttaatcc accatcaatc aaataaaaatc caccagfttat aaagagctftg cftfttagact  
101701 tftgfttaaaaa atcagfttcag ctatfttcat ftggtftcatc atgtgcaatg tftgcaaaagt  
101761 tftgaaacaa tctftftgcb atftggcgtftt tgagagfttct tfttatataca gftatftatc

101821 taatTTTTGG tgcaaagata aaaatttcta acttttatct tgcttgTtaa aataatTTTT  
101881 aatctTTTTG acaaatTTTT ctttaggTtt tatcacGCCa ctttcctTgc catttgTggc  
101941 atgatatacg ctaactccat gtttgctTgc ataaaattgc atgagtagtt tttgtagttt  
102001 gtattcacta gaataattaa accaagcatt attgcttata gctatgataa tttttgaatt  
102061 tttataatTT tgttctTTTT tagcctcata acaaatagca ttggtaatga tttgatcatt  
102121 gagtttatat ttgctttTga atggtccttg atcaaattct gctatattgg gtaaaaagta  
102181 tttttgtatt gtttctTTaa aaaatggaat gtcctccca aaaggtaata aaaaatgTtt  
102241 attgagtata tagctattgc ctcctttgaa aatatatgtg ctattgtaag ttttaccctc  
102301 ttgtatgttaaatgctccag ttatgatgat aatttgatgt gatagttctt ttagcatttt  
102361 ctcgatgaggtatTTTTga ggTtaaattgc aaaagcggTt tctggtaaga tgatgagTtc  
102421 ttttttttca ttgatagctt ggataatTtc cttgattaaa ttgtctgaat ttacagatac  
102481 attttctTga aggaatTTTT gatcttgaga tatatctgta gaaataagct tataggatag  
102541 atttaaatct tctgattTTTT tttcatcgta ttgaaaacct atagaaaata caatcaaaag  
102601 aatagcaatt ttataatata gtgaaatata attttcatga ataatatatg ctagtaaaaa  
102661 aatacaaaata ataccacgat agctaggatc aaaaaaacca tatacagtat aaattcccca  
102721 attaaGCCaa tcaaagccta aaggatgaat aaagctTtaa caaaaaattc cacaaaggcg  
102781 taaaaaatca aatttaagta aataacaaat tctaaagagt attccataaa ctatacctat  
102841 aaggataatc actataggca ctaaataaatt taaatcaaaa taaatcgaag aaagccctat  
102901 ccacaaaaac caaagcacc ctacaaaaaa tcctatccaa aatattgct taggactttt  
102961 gctttttaaa agtaaaacta agcccaaat tgcgaggaat gaactgatag cttgggTtaa  
103021 aatattttca aaaaaagata aataaataca atttgaaagt aaaaatgcta taaaaagac  
103081 ttttattatt ttaaaaatgg tagaattagt gtttaatTTT tttggaataa aggaaaaata  
103141 tggcagaaaa ttcaattTTa acttcattgt tacctctTgt tgtgctatTT gcaatTTTT  
103201 atttttTggT tataagacca caacaaaaac aagcaaaagc acataagcaa atgctagaat  
103261 cccttcaaaa aggcgataag attatcacca atggTggact tatttgTgaa gtcgTaaac  
103321 cagaggacga ttttatcaaa gttaagctta atgaagacaa tgTtactgca aaaatttcaa  
103381 gagaatttat agcaaagaaa attgatgcgt aattctaaaa tcacttatcg attagttgTt  
103441 tttattgCgg tatttattTT tggagttgTt ttttcgctc cttctTTTT gcaatccgag  
103501 cgaggagcga aatcaattt agggctTgac ttacaaggcg gactttatat gctttTgggT  
103561 gtagataatc aagaagctgt aaaatctaaa atcaaattcg tcgcttctc tttgagttat  
103621 tcttttaata aagagaatat tttaaatgat ggattaaata ttcacgatga tagtttgat  
103681 tttactttat tggataatgc agatatagtt aagactgaaa atttactcaa agaaattaat  
103741 gggcttaatg tgcaaagaga agatatgcat tatatagttt cttttacccc agaagaggtt  
103801 aaaagtatag aaaatTTTgc tctttTgcaa gcagttgaga cgattagaaa tcgttTggat  
103861 caattTggTt tagcagaacc gacggctgca aaacaaggTg aagataaaat cttagtcgaa  
103921 ttagcaggaa ttaaaacca agaagatgaa ttaagagcta aagagcgcTt tactaaagca  
103981 gctcattTgc aactcatgga ggtagatgat tctaaaatga gtcaagcttc taatatgagT  
104041 gatgctgaag cagcgagtta tgggctTgTt ttggTtctg attctagaaa tccaaattta  
104101 aagtatcctt taaaaaatat tcctattTTa gatggTtcta tgcttacaga tgctagagta  
104161 ggacttagtg ataagagtaa ttatcctgTt attaatTTT ctttaaattgc tgaaggTtct  
104221 aagaaattTg ctgattatac aggggcaaat gttggaaagc gttTggctat cgtgctagat  
104281 aataaagtat attctgctcc atcgattaat gaacgcatag gtggTggaag tggTcaaatc  
104341 agcggagcTt ttactcaaga agaggcgcga gatgtggctg tggctTTaag aagtggggct  
104401 ttattggcac cggTtaaact tttagaacaa agaagtatag gtccatctt gggTgctgat  
104461 agtatcaaaa tgagtatgat agctcttata ggtgcttcga tttttatcgt agtatttatg  
104521 gtgctttatt atggTatggc aggaatTTTT gccaatatcg caatgctTgt taatgtTTTt  
104581 gttgtTgtgg ctgtgatggc aatgtTtggc gcaacctTga cttaccagg tatggcagga  
104641 cttgtTTTaa ctgtgggcat ggctgtTgat gctaatgtta ttattaatga gcgtattcga  
104701 gagctTTTgc gcgaaggggc aatatcaaaa gcaagtatag agcaaggTta taaaaatgct  
104761 atgagtgcga taatagattc taatatcact tctctTgtaa cttccatagc actttatgct  
104821 tacggaacag gtgctgtTaa aggattTgca gtgactTtgg ggattggTat tgtTgtTtct  
104881 atgattactg ctattTgggg aacgcattgga atgtTtgatt attttatgcg ccgattgaa  
104941 aaaagtaata atacaagatt ttggTtTggT tataggagaa aataatgcag ttttttagcg  
105001 aaaagaaaa ttatgattTT atgagaatgc gttttgctgc aatttctctt tctattgTtt

105061 tattttttgg ttctatttat ttgctttggg atagaggttt gcaatttggt attgatttta  
105121 gtgggggtac tttaatccaa cttaaatacg atacagcagc tcctattcct caaattcgtg  
105181 aaattttaga aaaacaaggc agtttccaaa atttatctgt aaccgaattt ggaagtaaag  
105241 aagagattac tattcgtttt ttaggaagta atgatagctt aggtagtgat ataggtagc  
105301 atattagcac tcttttaaaa gatacgggca aatttgaagt gcgctgtgct gatgtcgtgg  
105361 gtccaaaagt gggc gatgag cttagaaata aggggtattat ggctatcatt gtatccttag  
105421 tcgctatttt gatttatatt gcaatacgtt ttgaatggcg ttttgcatta gcggcaatta  
105481 ttagtgaat tcacgatggt gtgattactt tgggagcgat ttcattattt aaaattgatg  
105541 tcaatttaga tactttggct gcagttttaa cagtgcctgg atattccttaaat gatataca  
105601 ttatcatttt tgatagaatc agagaaggga ttaagacaag taaaaaagc gaacttactc  
105661 ctattatcaa cgaaagtgtc tcagcaacct tatctagaac agtattgact tcaggactta  
105721 ctttggctac tgttgtgata ctttattttt ttggcggaga gatgatacaa ggtttttcct  
105781 tggctttgat agtgggtatt gttgtgggaa ctttaagtcc aatttttgta gctagtccaa  
105841 ctttactttg gtttaaatc agtggtattg attttagaaa taaagaactt gaaaaactta  
105901 aaagaaagca agaaaaagaa cgcaatcgtg caatgtatga aaaaggaacg gtttaagga  
105961 agattatggc ttatgatgca aatttgatag aaaaaaatg gcaagaaatt tgggataaaa  
106021 atgagtattt tgaacctaaa gatgatttaa cttacctaa aaaatatatt ttatccatgt  
106081 ttccttatcc tagcgggctg atacatatgg gacatgtaag aaattatagt ataggtagt  
106141 ctattgctag atattatcgc aagatagggt ataagtgttt gcatcctatt ggttttgata  
106201 gttttggtat gccagctgaa aatgcagcta ttaagcacia aattcatcca aatccttggg  
106261 cttatgaaaa tatagcctat atgaaaaatg aacttttttc tttaggtttt tctttttcaa  
106321 aaaaaagaat gcttgcgact tctgatccgc tctatacaaa atttgaacaa gaatttttta  
106381 tcaaaatgta tgaaaagggc ttgatttata ccaaagaagc aaatgtaaat tgggtgcgagc  
106441 aagatcaaac tgttttagca aatgagcaag tagaagatgg aaagtgttgg cgttgcggac  
106501 atgaagtagt tcaaaaaag atgccagggt attatgtaaa aatcacagcc tatgcggaag  
106561 agcttttaag cgagcttgag aatttaaaag ataagtggcc ttctcagggt ttaacatgc  
106621 aagaaaattg gataggtaaa agcagggttt tggaaatttc tttaaattta gataaaaaaa  
106681 gcttagaaaa agcaaagac caatcttttg aagttttcac tactcgtgcg gatactattt  
106741 atgggtattc ttatgtagct ttagcacctg aacataaaat tgtgcaaaat ttaatacagg  
106801 caaattgttt agatgatgaa aaagtagagc aaattaaaaa tatgcaaaaa caaagtgcc  
106861 gagaaagaca aatggctgat aagcaagggt gcttttttagg aatttacgct attcatcctt  
106921 tgactcaaga aaaactccct gtttgggtag caaattttgt attggctgat tatggtagcg  
106981 gagctgtaat ggctgttcca gctcacgatg agagagattt tgaatttgct aataaatata  
107041 aacttgaaat caacaagtg attgagtgcg aagatgcaca gcttcctcat gttcaaaaaa  
107101 caggaaagct tatccaaagt ggtgaattta atgggcttga ttgtaatgaa gcaagagcaa  
107161 gaattatttc aaaatttgaa gatgaaaaac taggaaaaag ggttattaat tttaaaattc  
107221 gcgattgggg agtttctcgc caaagatatt ggggtgctcc tatacctatg gtaaaatgta  
107281 aagcttgtgg gatcgtgcct caaaaaattg aaaatttacc tattacctta cctgaagata  
107341 ttcaaatcac aggagagggt aatccgcttg aaaaacatcc cacttggaaa aattgcactt  
107401 gtccaaaatg cggacaagag gctcaaaaag aaagcgatac tttagatact ttttttgaaa  
107461 gttcatggta tttgacagc tttgcaagcg atgagaaaac atggcaagaa aaggctttgg  
107521 ataaagagag tgtgagatat tggatgaatg ttgatcaata tatagggtgg atagagcacg  
107581 caattttaca tttgctttat gcaagatttt tccaaaaagt tttaaaagac ttgggatatt  
107641 tggaagataa tgaacctttt gctaaacttt taaccaagg tatggtttta aaagatgggtg  
107701 ctaaaatgtc taaatctaaa ggaaatgtag tcgacctga tgatattatc aataaatatg  
107761 gagccgatac agcaaggctt tttattcttt ttgctgcacc tcctgctaaa gaacttgagt  
107821 ggaatgatga tgcggttgaa ggagcttata gatttatttg caggctttat gatagggtc  
107881 aaaatgttag agctggagag cttttagaat ttaagcatga ggatttaaat aaggaagaaa  
107941 aatacgttag attgaaagtg tatgaagctt tgaaaaaatc ttttgaagtt tatactcaaa  
108001 gtttcgcttt taatacctta atcgctgctt gtatggaggc gcttaacgcc ttagctgctt  
108061 gcaaaaatga agcttttagag caggaaagctt tttatattat cttaaatatt ttagagccta  
108121 ttattcctca cgtgtgtttt gaattaagtg ataagctttt taaatgtgag aatttcaagg  
108181 ttttaaaatt aaaagaagaa gtttttgtaa aagatagctt gaatttgggt atcagtgtaa  
108241 atggtaaaaa gcgcggagaa gttgaagttt caagctcggc aagccaagat gaaattttag

108301 aactagcaaa gcaaaaagtt tcaaaatggt tagagggtaa aaatatagtt aaagaaatth  
108361 atgtagaggg aaaattggta aatttgggtga taaaatgaaa ggaatthttat thtttatcgt  
108421 ggctthtattt ttgggggctg gcggttacat tccgacctca aaagtagcgg ataathttt  
108481 taatgataaa gtatatgtca atgtggagtt aagccttcaa gatcctagaa atagthttt  
108541 cgtagccgat actcttaaag agatggttat ttcaaaatta gggcgaaaat tggctthtaa  
108601 acatgaggca gatgatgtga tcaatgttag aatgaataat cttgaatthta tccctthtagt  
108661 ctatgatcaa aatggttatg ttgtaagcta taaagccaaa cthaatthtag aatthtaaagt  
108721 ggtatthtaa gatggctactg ttgaacatth taatacaagc ggaagctata atthtgatat  
108781 atcgcctaag agtattatca gtgattcagc gcgthtatgaa gctatacgag cagcttctag  
108841 cgaagcttht gatgaatthta thttagtaat agccataaag ggacaaaagc gtgctacca  
108901 atattaatga aatagcaaaa gaaactthta ttacgctcaa agatagaaaag cthcgtccta  
108961 ctcccgaaaa ctatacagaa atthttgaaag aactthctaa aaaathatggc thtaataagct  
109021 caaataaagc aaagcttgaa aaatacaaaag cthtgcttht gccaaactat caacaagaat  
109081 taaatthctaa atctatccgc actthtagaag aatthaaatg cththtaatt tccgcctha  
109141 ataggcaaaa tggaaaacaa thcagtgaaat thtttgattt thtagctact thtccaaga  
109201 gthtacaagt aagtagggat aaaaaatth gagactthggc taaaatthact thtattagaa  
109261 thtcaaaaac tatggacagc gaaagthatt atthgctthc taaaaatgg aaagaatthg  
109321 aaaaaagcta taatgaaagt gathtagaag gcgaaactaag aagathatgg atcgcaaaat  
109381 atgatgattt tgatacggtg gthtagaaaac ththaaataa gthtagaagaa agaagthtag  
109441 aagththtgc tgagctthta acctcttgth taaatccatc thtagthtag gatcthaaaa  
109501 thcacggctt tgcacaaaat thactthcaa ggccctthct thtaagtgaa agcagththta  
109561 aaaatgagct thtggaaatth gtcaatcgtc gcgtgatggg tgataatath tacgtgcaaa  
109621 aaaatthtaa thththtaat gataatthta aaaagathcta tgagcttht atathgctaa  
109681 ataagthcaa tgaacaaaat athagathth taaathactt aaaaccgat acaaaaggag  
109741 aagthaaact tagththgaa cththaaagc aaaaattht gcagctthtag gagaagatha  
109801 atthththaa tgcacaaatt gaaththacgc aaaaatthaga agagcgcgaa thctggagtg  
109861 ththaaaga gcttgagaga thggatgaga atthacaacaa gtataaggth aathatthct  
109921 tggcattgth thctataaaa aathatcgtth ththththgga aathatgga gthgggtagth  
109981 taaatgagat ththtgctgth ththaaaga ththaaaga aagthgtact gaathtgatg  
110041 aactthggat gthtagatgaa aagagthtath ththththct gcctggaaga aataaagaaa  
110101 aagthcgaca actthgtcga gaaaatthta agactathga aaththctg ththththaca  
110161 aaaaagathat thththctca aagaththca cagctthatt ggataaaca agcatgccc  
110221 atgthcaatath thtagaaaa thaaataatg aaththctaa thtagatgaa agaaacgatg  
110281 caaaagathca gthaaagthga tgaaththta gcacaaaaga gtacaaatha tgacaagath  
110341 gatcgttht ththththtag aathgtatgaa aathataaaa caaththct agthaaacc  
110401 atthctca thcatagggac aathggaaag ggaagthacag gthagathth aactcaact  
110461 thtagaaggth taggththta agthgggcat ththththctgc cgcaththt thgaathctg  
110521 gaacgcttht athaaaatgg agathgtgth agthgaaatg atthtagaact tgcacataaa  
110581 aaththgctag aththththaa agaggathth aaaaactth gctathththga athcgcact  
110641 thththtagcgg tggagctct thaaagathgt gaththththga ththththgagc aggggtaggg  
110701 ggtgaaatag acgcaactth ththththgath aaaaactgath gththththct aaaggtgggg  
110761 ththgathcata ctcaaththt gggagathact thtagaaaaga thgctagaac aaththctaa  
110821 gthththgcaa aacaagctth gathththcaac gagcaagacg aaagagthth gcaaatggct  
110881 caaaaatag catctcthaa aacacaaaa thththththct catggcagcc thagggthga  
110941 atththtagagc agctthgatg ththththctaa aathththct thctgath ththththgac  
111001 aathththth tagccthaa thgaththgaa athththct ththththctaa actthgthca  
111061 gctthgctha aaththgaaa aththththth aagggagct gcgagcaag thgctctaat  
111121 ththththgth atgthgggca thththththct gctgththct cthththgth aathththth  
111181 ggtgaaaaac ththththtag ctaththct ththththgath aagaththth thgagathth  
111241 aaaaathth agcctathth thgathththth aathththth aathththth aathththth  
111301 aaththgctha atgathgaa ththththct gcaathgath ththththth aathththth  
111361 ththththct tagathgaa gaaaaaact ththththth gthththctg cththththgaa  
111421 agthththth aagagthggag thgaththth thththththct ththththth atcaththth  
111481 thgththcaag cathththth ththththct ththththth atcgtthct ththththth

111541 ttttatattt ttatnttttaa ttttttagcgg ttttttatatt aaatatcttg acagtaaact  
111601 cagcgatatac agtactaaaa gagaagagct tttagcaaag agcaaggagt tagagcttgc  
111661 taatgcgcaa atgcaaaaaa atgttgaaga aaaggcaaag caatatgcag ccatagaaga  
111721 taagatcgct tcttttgaag aagctttagg tctagaggct gaaaataatc ttactattac  
111781 agatagactt gataacttaa agcttacaaa tgagcagcag attgggatat tggggcaaat  
111841 tcccaatgga tggcctattg aaaataaagg agttactggg aatnttggat ggagagagca  
111901 tcctctttta aaaagaagag aatntcatcc aggcattgat ctaagagcag cagtaggtac  
111961 gcctatataat gcacctgcta acggagtgtg cgagntttca ggatatagcg ataatggtta  
112021 tggctataat gttatntttat tgcataatnt tggcntttaa actgnttttg ctcatatggg  
112081 acgaaaagac gttgtcaaag cgggtcagtt tgtcaataag ggccaattga taggttatac  
112141 tggcaataca ggactnttcaa ctggctccgca tntgactat gaagtgaggt ttattaataa  
112201 aaccttagag cnttttatatt tntttaaatnt agaaaagaaa aatatgaatg aatntnttaa  
112261 tcaagaaagg agagntccat ggcaatctnt aataaaagcg gtaacagcac agcacttagc  
112321 tccagntccg aaacaacagt aatntcatca ggtgcgagaa tagagggtaa gntntatntt  
112381 gcttctatgc tccatgtaga tggagagctt aatggtatag tgcattctga aagcatagtg  
112441 gttataggaa aaaatgggaa tntaaagggc gagcttaagg ctgataagat agnttntaat  
112501 ggctgntttg aaggtgattt agaggctgac agccttgaaa tattagcagg cggcgtggnt  
112561 agtggaaata ttagcattaa agactntggct atagaaaatg gcggtcgtnt taatgggaca  
112621 agcaagataa agcaggaaga gcctgtaagg ttgnttagaga atagctcaga ataatgcaag  
112681 caaantnttt tgagtatntg caagnttaa atatatcaca attgntactt tgcgaagatg  
112741 ataaagaatc tntnttgctt tctcaagntg ctctntntaa gggnttgaaa acatntcgtnt  
112801 tacctgattt tagagctgaa ttcggggatg atntaagagc tntntccaaa gagctntntg  
112861 agctntgcaa agntntaaat gcttatcata aggaaaaaga tactaaaat cttatctcc  
112921 cnttatctac tatactntaa aaattacctg gtcaaaaaa tntaaaaagc tataatctnt  
112981 ccaagaagaa tgctnttgac ttaggtgaat tntaaaaatga actcatcaag cttggatatg  
113041 aatntgtgga tatgntccaa gataagggnt aagntgagnt acgcggagag attatcgata  
113101 tntntgtat taatgaagaa ttaccacta gggntntact tnttgagat gagnttagaaa  
113161 gcattagaaa atntgatcct atgaatcaaa aatcattntc caaagaatat gaagagcttg  
113221 aaatntgtcc tntnttgaca tntntntctg aagaaaatta tgaagatnt aaagacaaac  
113281 tagaaaatnt caatagcgat gntntgntca atgatntaa tctnttagga tnttgntgta  
113341 ttgatgattt ttgtgattat ttagaacttg atntntaag tntntaaaaa ttcaatcaag  
113401 aagaatggga taaagatctt agntaaaatca atgctaaaat tatacccaa gctntctgnt  
113461 ataaggatnt aaaaagntct tataataaag actntntntc tntgcatcaa aataaaaaaa  
113521 ttataatntt ggctaaaaat gaagcctntg tntaaagctnt agagcttgaa aatacacaaa  
113581 atatntctnt tcaaaaaagc gatntaatcc tntaantntaat cagcaatcaa gagctntatca  
113641 tntcattaaa tcaataagaa aaacaaaaat acaagcgtaa agcaaatctg attatagatg  
113701 agntaaaaat cggcgaatnt atcgtntcatg aggattatgg tntaggtaaa tctntaggtc  
113761 ttgagatgat tagcattagc ggggctaaga aagaatntgt tgcgattgag tatcaaaata  
113821 gcgacaagct tctnttgccg gntgaaaatc tnttatatgat agacaagtat ttaggagcaa  
113881 gcggagggat accactntta gatcgtntag gaaaaatgac tnttatcagg ctcaaagaaa  
113941 gattaaaaac caagctntta gccattgctt ctgagatntg tattatggcg gctaaaagag  
114001 cnttgattaa accaaaagaa atcaagatag atntatgcaga tcaagctnt tntgntntcaa  
114061 aagctggatt tctntataca caagatcaaa acaaaagcttg tgaagaaat tntaaacgatt  
114121 ttgaaaatgg taaagtgat gataggctnt taagtggcga tntgggntnt ggntaaaccg  
114181 aagntgcgat gaatgctat tntcctgntg tntaaaagntg tntntgntct tntntctntg  
114241 cgccactac gctnttatct catcagcact ataagagntt aaaaaagcgt tntgagcctt  
114301 ttgatnttga agntntntaa ctggatcgtt tntacaagcac caaagagaaa aaaacnttaa  
114361 tnttgaatnt agagcaaaac aaaccctntg tngntgnttg caccatgca cntntaaatg  
114421 tagagnttga aaatntagcc cntgntatca tntgatgagga acataaant ggagntaaagc  
114481 aaaaagaaaa atntaaagaa tntaactcaa atntctatct tntatctatg tcaagctactc  
114541 ctataccaag gagntntaat caagcctnta gntccataaa atctntatagnt gntntcaaaa  
114601 cccctccaga agatagactt gatgnttagaa cntntgntgaa agaaaacgat gatgntcctnt  
114661 taaaagaagc tataacaaga gaatntagac gcggcggaca aatntntntat atacacaatc  
114721 atatntgcaag catagaacaa tntaaaaaac atntactnta tntatntntaa aatntaagga

114781 ttttgat tttt gcattctaaa attgacgcaa agattcaaga agaagaaatg cttaaatttg  
114841 aaaataaaga atacgattta cttttaagta cttctattgt tgaaagcggg attgatctac  
114901 ctaatgcaaa tactatgata gttgaaagaa gcgatagggt tggaatggct gatttacacc  
114961 aattacgcgg ccgtgtaggc aggagtgata ggcaggggta ttgttatttt ttagttgaaa  
115021 acaaagaaga gcttactcaa gatgcattga agcgacttat ctctttagag agtaattctt  
115081 atttgggagc aggttcgggt ttagcttattc atgatcttga aattcgcgga ggtggaaatt  
115141 tattaggcat cgatcaaagc ggtcatatag agcaaatcgg acttagtttg tatcttaaaa  
115201 tgctagaaga tgagttaa at gcactcacta aaaaggaaag ttttgaagag aaaaaatag  
115261 acttaaaact tactattaat gcttttttaa attcagaact tatcaatgaa gatcgtctaa  
115321 gattagagct ttatcgtagg cttagtaagt gtaaaaacat agatgaagtc tatgagattg  
115381 aaggtgagat agaggatcgc tttggaaaac ttgatcttta tacaagcag tttttaatgc  
115441 tgattataat taaaatttta gctttgggga aatttaaaac cataagcaat tttgagcaaa  
115501 atatacaatt tgtaaaaatc aatgatgaaa aagagtttat taaagcaaga agcaaagatg  
115561 atgatgat at tagaagca gttttaacat atttaaggaa agacagacaa tgattgattg  
115621 ggataaaact tatgcggcaa tttatagatc tagaaaggat ttttaaac ccattgtaga  
115681 tcttgataat attagcttga atgattttatt gggcatggaa gagcaaaaaa atgctcttta  
115741 tcaaaatact ttaaatttta tccacgataa aggagcaaat cacgcacttt tatgggggtgc  
115801 taagggtacg ggtaa atcaa gcttaattaa agctattttt aatgaattta aagacaaagg  
115861 cttagactt gtagaattag ctaaagatga tttatttgct ttagttgata ttatc gatga  
115921 gctaagagag cagcctttta aatttatatt attttgtgat gatttttctt ttgaaaaaaa  
115981 cgatgatagt tataaatttt taaagccttt gctagagggt agtatagaag cacctccacg  
116041 aatattatt atttatgcta gttcta atag acgtcattta ttaagt gaaa gcatcagcga  
116101 taatcaaggt gttcaagtcg ctcacgcaga gcttcatgca agtgatgcgg ctgaggagag  
116161 attgagttta agtgatagat ttggctcttg gcttagtttt tatcaaggga atttaaacga  
116221 gtatttaaaa cttgttgatt tttattttaa agatataaaa tgcgataagg aacttttaca  
116281 taaaaaagca aaagaatttt caaatttaag agcaagtaga agtggaaagaa ctgcaaagca  
116341 attttattta gcttttaagg aaagtattga atgaatgggt ctgatatctt taaaaaactt  
116401 cttgcttgca atttggattt taaagaattt gattggcttg aaaatcaagg tttgagtgat  
116461 tttgagcttt taatttctgt gattttaacc caaaatacaa aatgggataa tgtcttaag  
116521 gctttaaata acttaaaaaa tgcgcaaatt tcaagcttgg agcagctttt aaatttatcc  
116581 aacttagaac ttgctacact gataaaacca agtggatttt acaataccaa agccaagcgt  
116641 ttaaaagaat tggcaagtaa cattttagat acttacagcg atatagaaaa ttttaagaaa  
116701 aatgtagatc gagaatggct tttaaat atc aaaggtttgg gttttgaaag tgtggatagt  
116761 attttaatt atctttgcaa aagagaaatt ttggtttag atagctatac gcaaagattg  
116821 gctatgcatt tgggttatga atttgaaaat tatgaagaat taagagaatt ttttgaaagt  
116881 ggcatagaaa atgagcaaga aaatttgtgt caaattttag aaaaaaata cgagcttttt  
116941 gaactttatc aaattttcca tgctctgatt attgcttttg gaaaagctgc ctttaaggga  
117001 gcaaaattga ctttagaggg tga aaatttg attcaaaatt taaaggaaga ata atgaaag  
117061 caaaaggaag tgatttaatt cctgtattga gtatagctgg aagtgattgt agtgggtggg  
117121 ctggcataca agctgatctt aaaactttta gtgctcacia tctttttggg atgagtgttg  
117181 ttttgagtgt agtagctgaa aatacagcaa gagtgatttc agttcatgat ataccgttc  
117241 aaagtgtgga tgagcaaatg cttgctgttt ttgaagatat agtgccaaag gctactaaaa  
117301 taggaatgat aggaacttgt gaactgatgg agtgcgtggc tagaaattta gaaaaattca  
117361 aaccccaaaa tatagttatc gatcctgtga tgtttgcaaa aatggcttt gctttaatgc  
117421 cacaagaaaa ttgtgatttt tttaaaaaga ctatagt gaa atttgcagat attcttacgc  
117481 ctaatatccc agaagcggaa tttctttgtg attttaaaat aatgatgaa aaagatatga  
117541 taaaagcggc taaatattta tgcacacaag gggcaaaagc tgttttgctt aaaggggggc  
117601 atagtgaaga aaatgcta at gatgtgcttt ttgatggtaa tgaaattttt attttaaaag  
117661 gcgaacgcat agaaacaaaa aacactcatg gtacaggttg tacactctct tcagcaattg  
117721 ctagtaattt agccttggga aaagatttgt ata atgctgt aagtgaggca aaagaat atg  
117781 taagaaatgc gatttattat tctttaaatt tagggaaggg ctgtgggcca actaaccatt  
117841 ttttcaggtt tttaaatgaa aatgat tta gatcttagtc tttatcttgt agcaagtcgt  
117901 ggaaaaaaa gtgacgagct ttttttaaac acgcttgaag aagcgataaa gggcggagta  
117961 agtataatcc aacttcgcga aaaagaatta aattcaagag aattttacaa gcttggcttg



118021 aaagtacaaa agctttgcaa ggaatatcaa ataccctttt taatcaatga tagaatcgat  
118081 atcgccttag ctttagatgc tgatggagta catttagggc aagaggattt agaagtatat  
118141 cttgcaagaa aaattctagg caaagaaaaa atcataggct taagtcttaa gaatttagaa  
118201 caattaaaaa atatcgaggg agttgattat ttaggttggtg gtgcgattaa ggctacccca  
118261 actaaagaaa gttctgttat aagtcttgaa actttgagtc aaatttgca gaaaagtcct  
118321 gtgggcgctt tagcaatagg cgggattgat aaagagctga ttaaaaaatt aaagggtatt  
118381 aaaataagtg gtattgcagt agtttagagc ataatggatg cgcaagatgc ttatttgca  
118441 gctaaagaac ttaggcaaga aatgaatgaa aatttatctt ttaaatgaaa ccgcttttga  
118501 ggggtgtagaa aatcttgttt taaatgagat aattttttat gatttttagtg ttaatttaga  
118561 cgaatttgac gctttaattt gtacttcaaa aaatgcccta aaggctttaa aaaaaacaaa  
118621 aaatagttta aatttagata ttaatgtgta tgcagtaggg caaggcactg ctgaattcgc  
118681 taaggatatg ggttttaaaa aggttcaatt tgcgccaaaa tcttatggaa gcgagctttt  
118741 taatcatttt aaagaggaat taaaaacca aaaatgcctt tatttaaggg ctgaaaatat  
118801 agcttctact ttaaatttag atcttagatc ttatgggggtg gatttaaaag aaatcattgt  
118861 ttataagaat gtttttaaag agagcaaca aacaatcctt catcctgcta tttttatttt  
118921 tacctctcct ttaagtgtgg aaaatttttt gaggcaatat aatttagaaa aggaagataa  
118981 ggttatagca atagggcaga gtacagcaaa aaaacttacc catatagatc atctttttat  
119041 aagttctaag caagatttaa aagagtgcgt gaaattggct aaaagtctta tttagcttga  
119101 ttccaaaatg attcttttgt gcgcaagata aaggttttat ttattaaaat ttcattcattg  
119161 acattttttt gcgtatttaa tgctatgctt atatgtgcga ttatgatacc atcttggcctt  
119221 aaatttgcac ctttgttgat cgcttgaat ttgaaatttt tacattgagc tatgggatag  
119281 tggatttgta ttttgatttt atcgtttaag ttaggataat gaagtatgac agaattcaaa  
119341 cattcctttc cgtctaattt ggcttgataa agtagatatt tagcaagttt ttcattcggct  
119401 aaaatttggg cttgtaaata ataataagca tcttttaca atcttgggtg atagcttgaa  
119461 gtagtgatat ttaaactaag ccatattcct aaagcactga ttaaaaaatac caaggatagt  
119521 aaaatataag ctggtttcat atgaataacc tttttgtaag gcaatattct tgctcgtatt  
119581 cttttaaaca taatttaagc ttttgttttt gtatttcaaa taaactcaca ttatccataa  
119641 agatggaata ttgctcaagt cgattatcaa aataaggata taactcataa tgaattttat  
119701 cttctttaag aaataatttt attctagctt ggatagggat aaaattacc ttaaaagaag  
119761 tagtgatatt gttttctgaa tgaatgaata tttttttaat ttctttacct actagagcat  
119821 agacgatggt ttgtttatcg ttgtatagtt cttttcgatt ttgaagttga agtttgaaat  
119881 tgctattggg agaatataag cttgtattgt tttctaaaat aaggctagaa ttgagtaatt  
119941 ttgctttatt atcatcaaga tataataaat catctttaat taaacagctt atatgatttg  
120001 actcaagagc aatatcaaca caactttgaa gcaatttttc caaccttaac acacttaaat  
120061 gagtttttag tatcaactct ttcattttta attgctgatt gtttaataa taaaattccc  
120121 acaatgtcct agataaaaaa actgctaaaa atccggctag aattaatata agaatagttt  
120181 caaaaagact aaaagcttta ttcattgtaa aaatatagtg agtaatcttg atcttgaata  
120241 tgtaattttt taaattgaaa gattttatcg tctacatagt tttctttaa atcaagagtt  
120301 tttaaatttt gcacatgaag ctttatatcc ttttgatgag gattgatata aagtttatct  
120361 tgtagtgtat ataactttc aaaataattt aaatattcat gatttttatt tagctggtaa  
120421 aacaatttag aaatacttgc aaaaatcaat ctaaaaaata caatacaaaag aattaattct  
120481 aaaagcgaag atgcaacttt catgttgcac tagcattaag agcttcaaag aaagttccac  
120541 gaatgccttt ttgctccaat actctaactc cttttatggg aacacctgca ggcgagcaga  
120601 tttttctttt aataatagct ggggtgctcat tttctagcag ggccgcggcg cttttaaaaa  
120661 gtgaacgcgt aagatttaaa ctcagttctt ttgataaacc ttcataatag ccagcattag  
120721 caatgctttc agctactaaa gctaaaaaag caggagcgca accacttata gccatagcag  
120781 cattcatttg tttttcttgc ctttaactcat aagcttttcc aaaagtattt aaaatttcta  
120841 tgatttcac tttaaaattt gaatttttta aaacataagg agttgtagaa gccttatatt  
120901 tggcagctgt atttggcatt atccttgcgt aattttcagc ttcaatgagt ctttaattat  
120961 caaaatttgt attggctaaa actgaaatta aaatttttgc tttacctttt aaatttgccg  
121021 caacactttc taaagcataa ggtttaaaag ctaagataat atttttattt tctatatcaa  
121081 agtctttata aagtagagtt ttaaaacctt ctttttctaa attttgaagt ttttctaaat  
121141 ttctaccgac tatatagata ttataagaat cttttaagcc ataagccaaa gcttgtgcca  
121201 tcgcaccatt agcaagtata tataagtcag ctttcattac ttcttaatat aatttgaat

121261 ttgatccgct tgaaaaaagt caggataggc tacggtatct aagattactt gcaccataga  
121321 attattatca agattaataa ctacaggagc taggaaattht acagtagatt cctctatgct  
121381 ttttagcaatt gctactatat tgaaaattht catattggat tcaggcgtca aagaaagtaa  
121441 ttcttggtag tatgtaggta tttcaaattc ataactctggt cttataagat aaggatcaat  
121501 aagaacaaaa gaaaaatctt tcccatcaag actthttaaagt cttacaaaca cttcatcaat  
121561 gggtgaaaaat tccatatttht tggthtcttc aaaacctaat atagggcatt taacagctag  
121621 tgtcatttht tctcctcgag thtataataa aatatttht cacaataa gcaatattag  
121681 ttccaaaatt taaatttht tatctaatt cactataatt ttaatttht aataatcata  
121741 aagtatttht aatagtgtat ttaacttht aaataaaaa ggcaaaaatt aatgaaaaa  
121801 aaattcttht tatgtatttht attggggatt ttattcagtg cttgcagtac aaaaaatgat  
121861 gaaggattgt ataatttht tgcaagcga tggataaac agattattaa agatttaca  
121921 gataaagatt tagaaaaggc tgacgatcat tataatggta tggcgagcga gcatatagca  
121981 gatccgcttht tggagacaac tcaaattatc ttagcacaag cgcataatgga tgaagaagaa  
122041 tatcaactag cagagthttht thtggatgag tataataaaa aattthtggaa ttcacgcaat  
122101 gcggattata ttcgthtctt taaaatcaa gccaaatttht atgccttht tgtgcaaat  
122161 cgcaatcaag cthttaatgct tgaaagcaa aaagaaatag atagthttht aatgattat  
122221 ccctatacag aatatgaacc thtgggtgaa actatgtht ctaaatttht thtagcagta  
122281 thttatttht atgatacaat acgcgatttht tatgagcgt caggacatac tcaaagtgt  
122341 gaaatttht aagaaagact gcaagaaagt gagthttht atcaaagcat tattaagcca  
122401 gagcttctt ggtatagaag catatttht aaatttht ttaagggaa actgatgcaa  
122461 attgaagaaa tgcaaaaatta tccaagtgat ttacctatt tagtagagga tgaattatt  
122521 ttatatccat ttatgattac tccaatttht attagcatt ctgcaaatat gaaagcttht  
122581 gattthtggaa thtaaaacga thcaatgct thttagctc thtcaaagct tgaaaacgga  
122641 agatcttht atgaaatttht tgattthtgg gtgthtggga cgattatgag aaaagthtct  
122701 ttacctgat gtagagtht aatacttht caagthttag ctaaggccag gattgthttaa  
122761 gcactthtcaa gcaagcttht agaagcttht atagagctaa tcaaagaaga gthtthttagaa  
122821 ggtgcaaaaa aagaagctt actagatgtht thtaaaagaa aagthtagag thtggcaaat  
122881 gtcagctatt atthtctgcc tgattthtct cgaactatag atgagggtht agatgcttht  
122941 agaatttht atthtgatttht aaatactatt cgcatttht agcaagaagc thtcaatttht  
123001 thcatttht ctaatttht agaaaagct thtaaaattga tagacttht agctcaagag  
123061 atagaagcaa ataaaattca aaaagaaatc aaaaacaagg thcattctcg tattgataaa  
123121 gthtaataaag aatatttht aaaagagcaa thtagacaaa thcaaaaaga atthtggtagt  
123181 gataatcaa aagaagatga gctthtagat thtataaaaa aattagaaag caaaaagaaa  
123241 thtatgcacg aggatgcttht taaggaaatc aaaaagcaaa tcgaaaaatt tgaacgcat  
123301 catcaggata atctgaagc ctctatgata caacttht thgaaaccgc thtagatgta  
123361 cthtthtggaa aatagcaaa gaaaaactg gatatttht aagthgctaa gcagthtaaat  
123421 catgatcatt atgcgcttht taaacaaaa gaactgatt aagatatttht tgctgtgctg  
123481 gagctthtgg aagcgcgg tatagcggat aaagatggag ccaagtht actthtgtct  
123541 tatggacctc caggagtht gaaaaactca thtagccaatt cgtcgtctaa ggcatttht  
123601 agagaacttht thcgtatagc thtaggagga thggaagat thaatgagtht acgcggacac  
123661 gcctgacttht atataggtgc gatgcccagg cgtattacc aaggcttht tgaagcaaaa  
123721 caataaatc ccgtagtht gctthgatgaa atthgataagt thaacagaag cthtagaggt  
123781 gatcctagtg cggthtcttht agaaatttht gatcctgaac aaaattctaa atthtagagat  
123841 thtatttht atthttht thgatttht agagthttht thtagcaac agctaatgat  
123901 ataagcaata tacctgctc thtaagggat aggatggaat thtagagct aagcttht  
123961 actccaaatg aaaaatttht thtacttht aaatatttht thctgatga gctthttht  
124021 catgatttht aatctagtht atthgatatc aatgatgaaa ctatagagct thtataagc  
124081 gaataacta gagaacttht ggtaagaaat thtagcagaa aatagctga gctthtgcctg  
124141 aagatgctaa aaaaattact thtagaaat atcaaaaaag taagcatttht thtthttht  
124201 thaaatgaa thtthgataa aaaagthttht gagatagaaa agcatgatgg agaaaaccgc  
124261 gtagggcaag thaatggact agcatggact agthtagggg gagatgthttht aaagthttht  
124321 gcgatttht thaaagtht gggagagtht actcttht gaagcttht thgatgtht  
124381 aagaacttht ctagaattgc thtthtagctg atthagtht thaattht aggaaaatt  
124441 aaaaattctaa aagaatgat thtthtctt aagaataatg thtthtagatg thtthttht

124501 catatccatg tacctgatgg tgcaactcca aaagatggtc caagtgctgg aattacaatg  
124561 agtacggcta ttgcttcagt ttttagcgat aaaaaggttc gttctgatgt ggctatgact  
124621 ggagagatag atttagcggg caatgtattg cctataggag ggcttaaaga aaagcttatt  
124681 gcagcatata aggctgatat taaaatagct ttaattccaa agaaaaatta tgaagagat  
124741 ctaaaagata ttcctgatga ggttaaagat aatatgaaaa tcattggagt tacagatttt  
124801 ggtgaggttt taaaatacgc tttggtttaa aatccaaagc aaagaagaaa aggcaaaata  
124861 ttgattttgc cttttttatg tttatagtcc ttcgaaagga ttgtttacia cttcttttct  
124921 atctactata taaggaataa gagctacatg tctagcgcgt ttgatagcaa cttctaccat  
124981 ttcttggtat tttttgcttg ttcctgttaa acggcgaggc ataattttaa atctttctga  
125041 taaagcatgt ttttaacatag ctgtatcctt ataatacaata aattcaactt ttgcttctgt  
125101 gtatttgcaa tatttgcgag agtattttct tttttctgcc atagtttatc ctttaaaatg  
125161 gtaaactcggg gtcgtcacta tcataagcat caacatcaat ttctttaatt ttttcttggg  
125221 tttgggttagg gttttgtact tttgtttgca cttgttgtgg agctttttta aaattatfff  
125281 cactcatata aggatcataa ctttggtttt cgtaatttga ataattatta ttggctccat  
125341 aattattccc accattgtta aaatttccac cttgttgagg attgcttctc agcatttcca  
125401 tgttttcaac ttgaacgctg tgttttagagc gcatttgccc attttgatca ttccattggt  
125461 caaatcttaa acgcccttct ataagaactt tagaacctt agaaagatat tgatttgcca  
125521 cttcagcagt acgaccataa aagctaatat cgataaaaaca agtttcttct cgtctttctc  
125581 ctttgtgggt aaatcttctt gttactgcaa tagctgaagc tccaatggcg tttccatttt  
125641 ggccataacg catttctata tcgcgtgtta gattacctac caaacaact ttattaaaca  
125701 tttttttcct tattgaattt caggcgcgtc taaaggtttt atctcttttt tagactgttt  
125761 gatgccgtgg cttagttttt cccaagctgc aatttctttt ttattttcat attttacaat  
125821 taaaaatctt attacttctt ctgtaattct taaaattctt tcaagctctg caattaaatt  
125881 tgtaggagct ttgaaataaa ttacaaaata agttcctctt tcgtattttt tgattttata  
125941 cgctaatttt ctagtgccca ttggaacaac tgtttcaatt tctgcacat tttttacaag  
126001 gacttctttt acgaattcca actttgcatt cacttctctc tcggtaagtg ttggttttaa  
126061 aataaataaa acctcataat gtttcatata ttctcctttt ggatgttaag cctatgtgtt  
126121 tcacaggcaa ggattttgca aagtttttac aatgcaagat ttaattatac caaaatatac  
126181 ttaatcttta cttttcggcc gctaataatag aatattctac ttggttttta taaataatca  
126241 tttagaattg ctttttattt tttacatcaa ttcattgcat cactctcatg atatcgttaa  
126301 atgttgcaaa aatcatcaag cttaaaagta aagccattcc tccatagcta aggtattcaa  
126361 aagctcttgg tggaaacttt cgtctaaaaa tcatttcata aagattaaaa agtatatgtc  
126421 ctccatctaa cataggaata ggcaaaaagat ttaaaaattc taaattgata gaaattaaag  
126481 cagtaataaa tagcaatata accaaacttt tttcagctgc ttttgaggta agttcagtca  
126541 tagtgatgat accacctaaa tttttagcct ctacttcacc acttatgagt ttaatgatac  
126601 cttttactat aagagtagaa gctttcatal tctcatctaa agcataattt atactttgca  
126661 tgccttgatg atagattata gcggtgcttc cactagggtc taccccaagc tgagcttttg  
126721 gaatgatttg tccaaaatca ttataagctt gccctaattt tggagtgatg ataaattcta  
126781 aattctctcc ttttctatcg ataagaattt ttaaaggttc aagacttaga tgatcagaaa  
126841 tttcatcaaa actttgaatt tttataccat ttatagcaag tatggatcgc ttttttcaa  
126901 gtcctgctaa agctgcggct gaattaggtg cgatatttcc tatttgtgga cttagttttt  
126961 gtatgcctaa atttcctatg gctatgtaaa gtaaaaaggc taggaaaaga ttaaaaaaag  
127021 gtcctgcaaa aagaatataa atttttttta tagggcttaa aatactatag ctatcctgat  
127081 cttgattttc taagccaggt tgcatatcat cttgcccttt aagtttaaca tagccaccta  
127141 atggtaaagc actcaagcga tttttggtgc ctttaaattc gcgttcaagt aaactttgtc  
127201 caaacctat gctaaaaact tctactttaa cacccaagga ttttgccgct aaaaaatgtc  
127261 ctagttcatg aaagaaaatc aaaaaagaaa taactaaaat ggttgctaaa aattctatgg  
127321 agtaaaattt aaaaccaaga attaaaatca aagctaaaaa aagtaaaagat ttcattgtaa  
127381 tttcccttg ctttgtttaa tatagctaaa aatatattca aatcccaggt aaagcgtaa  
127441 aaataaagca atataaagta aaatatccc tcctatccat tccatgggta aaaatcctat  
127501 ggctatcatt tgaaggttg tttttaattt tccagtaaaa gaggcattta catttaaatt  
127561 ttcacttacc ataaccacgc gaaaaccggt gatgaaaaat tcacgcacca agataagata  
127621 aacaatccat tcattagctt ttcccgatag aagaagccct aaaaaagctg ctagggttaa  
127681 cattttatcc gctaaaggat ctaaaattcc accaagcttt gtggtttgtt gtaaagttct

127741 agctataaag ccgtcaaaaa aatcactcaa ggctgctaaa gcaaaagtca aagcggcaaa  
127801 ataattaatc caactttgat gtatattatc aaatttataa ctcaataaaa aaaagagcaa  
127861 ggggtgctaaa atcatcctta aaacagctaa agtattaggt atattcataa aaaaccttat  
127921 ttttagattaa gataaaacta attagatgaa attgtataaa atttaggcaa agcttttagta  
127981 aaaaaatatt taaatttata tttttttgaa atataatgta aaaaaataa acaccttgct  
128041 caaaagagca gggtaaaaaat caaagaaatt gaactatctt atcaaaatca aagcgatttt  
128101 tttgtggaat tttttcatca ttggaatacc ctaaagctat cactaaggta gatttttctt  
128161 ttttggtatc aagtaagaga taagaatcga gtttttcttt atcaaaaaccg cctatagtac  
128221 aacttgctat atttaaagca ttggcaccat aaagtatact agcaagtgct atatgagctt  
128281 gttctcttgc ataggatatt ttttgctctt ggctaaggga ttgtaaaaaa ggcatataag  
128341 tgtctaggcg tttttgaatt tctgcttcac tcatatctct ttttctaagt ttgtcttcaa  
128401 aataatctaa aaaatcaagc cttgaaacaa tgatgattaa tgccgcacaa tctttcacat  
128461 gttgttgggtg gttgcaaatt tgagccaact cttctttttt cttgtcatct tgcaccacta  
128521 aaaatctcca aggttcaagc cctaaagaac tagggcttaa tcttgctatc tctaagatag  
128581 tatccaaatc ttctttttta agtttttcat ttttaaaatt tctacaagaa tatcttgtgt  
128641 taaaaatttc aagtcctggt ttcactactt ctctttataa aattcaacta cttcatcaaa  
128701 ttttaaagc tgagtagggt attttggtc gtgagcttga tagcccaaag ataagatcac  
128761 agcggtttca aaaggatact caagtttaag aaaattatct accttatctt tttcataacc  
128821 ccctatcata caagaatcaa tacccaaact catcgagct agcgacattt gcatcattgc  
128881 aagatagcat tgaagttgtg caaaatgata aagttctttt tcatccattg catcagtatc  
128941 gtgagtataa atttttaaaa ttttttgtaa attttcttct ttagaacccg caaaacgacg  
129001 aatctgtttt tgtgcaaatt catccttgct ttgcaagtct tttcttgcta gaaagatgat  
129061 attgtggctt gcgcttgcta cttttcttg gttaaagcag aaattggcaa gcttttgatt  
129121 atcttcttta ttttctaaaa caataaattt ccagggttca aatccatgtg agctaggagc  
129181 taaaattcca ctttctaaga taaaacgcaa atcttcttca ctgatttttt tatcattaaa  
129241 aagcttacia gctctgcgtt ttaaaatcag ttctttaaaa ttcatattta atcctttaat  
129301 taaaaataat aatatcaatt ataaaatgca aaacttaatc aaaaaatatt atagtttgat  
129361 atttttctta aaaacaaagc cagatttttc aaaatccatt ttttgatata aaaattcatg  
129421 agcttgtggt ctaaaaaaac ttgagcttaa ttccaattct tcatatcctt gttgttttgc  
129481 ccaaatttga atttttttta agaaagattg acccacgctt ttgcctctta gggcttcatc  
129541 tacaacaaaa tcgcaaatat aaagacaatg attatgataa agtacattaa aaggcataac  
129601 tccacaagct gctttgaaaa ctcccttgct ttcatatgca aaaagtttat aatgttgagt  
129661 tttttagtca agttgaaatt tgtctaaaaa atcttctaaa gacagattgt ttcttaattg  
129721 ttttattaaa ggataaattt tttctaagtc ttcttttaaa ttaatttctc tcattgttaa  
129781 actctttaaa aatcaacaaa ttcagggtttt aatttttaaaa gcagacaaaa agtcgctaag  
129841 gtagcttgct tttgcataaa ttcacgatcg ccacttaaat aaagaatttc ttggataaat  
129901 gttccatctt taaacatcgc tcctatataa accgttcttg cttttatcaa tccttcattt  
129961 tgttcgctg taacaccgct aatagctagt gcaaaatcag gttttgcagt tttaaagata  
130021 cccttaagca taaaatacac acaacgctcg ctgtattcac cttggttttc taaaacacct  
130081 tcacttatac ctagccattc gtgcttgatt ttattagaat aacttacgat agaaccttca  
130141 aaaatttcac tcactccgct aaattttgta agagtgttg cgcaaagtcc gcccggtcag  
130201 ctttctgcaa aagaaatttt aatcttcttt tctaaaagtt ttgaaacgat aaattgtata  
130261 ggatctttac ctaaaaatac tttttgtcca aaaagatttc ttacgctcgt taaaaacca  
130321 tctagtttgc caaaattgac acaacttgct ttaatgagag taagattttc taataatttg  
130381 cttgatttta tactgacttc gtaagattta gttaaggat caagtagtaa aacagcgtc  
130441 tcatcatcta tgcctaataa acaaaaataa gcaaaattag gaaaaatata tccaagtaaa  
130501 ggaggaagtt tttgccctgg gtttgttttg ataacattga cttttgaatt gacaaaatca  
130561 catataaagc tatctttttc aaaataagcc ttatcgggga ctaagttatc ttcttttaag  
130621 actaaattat cttcacttag ggtagctaaa atttttgcta cggtagcgta gtgattgggt  
130681 gtggtaaaaa gagttatgaa atcatatttg tctaataatt tttcaagcaa aaagggtaat  
130741 tctttatcgg ttttattttg aaaacgagtc tcatgaattt ctttaatttt attttcatag  
130801 ctgcgataaa tataatcctt aaaattttca ttcattataa gttcatcacc gataagaaaa  
130861 agcaaatggt tcataaattt ttcctttttt atataattat agctaaaatt taaactattt  
130921 tgagtagaat ttaagattat aaaaacttca tctaggtgga acaatggatt ataaagatac

130981 cctgcttttg ccaataacta cttttgcaat gcgcgctaat ttggcagaat ttgagccaaa  
131041 aagatttgaa aaatggttta gcaagaatta cgcttatgaa aaaatgaaaa caaacgtaa  
131101 ggaagcgaag aaagctttta ctcttcatga tggccctcct tatgctaata ggcatatcca  
131161 cataggacat gctttaaata aaattctaaa agaaacgatt atcaaacgc attattttaa  
131221 tggagaaagt attcgtttta ctccaggttg ggattgtcat ggcttgcta tagaacagca  
131281 gggtgaaatc aaacttggag ataagaaaaa aagcttaagc aaaaaagaga ttcgatcatt  
131341 ttgtagagag cacgcaaag aattcgtaaa tatccaaaga gatgaattta aaagtcttgg  
131401 tgtgattgag gattgggata agccttatct tacgatgaaa tttgaatttg aagcggcaat  
131461 ttaccgcact ttatgagaga ttgctaaaaa aggtttgctt tgtgagcgtt ctaaacctgt  
131521 tttttggagt tgggaggcta aatcagctct tgctgaagct gaggtagaat atgaagataa  
131581 agaagattat tctatttttg tggcttttga cttagatgag caatcttgtc aaaaattagg  
131641 catttcaaaa gcaagtgcag tgatttggac tactactcct tggacttttg tggcaaatca  
131701 agctattgct ttaaactcaa atgaaaacta tgtgattacc aaagaaggat tgatttttgc  
131761 tagtgctttg cttgaaagta tggctgctaa aggtttgaca aagggtgaaa ttcaaaaaga  
131821 gcttaatgca aaagagtttg aaaaattaga agctatcaat cttttaaatt caagaaaatc  
131881 catcttgatt atgggtgaac atgttttaat ggaaggtgga agtgggcttg tgcatacagc  
131941 tccaggacat ggagaggatg attactatgc ttgtttaaaa tacgatatag aagtgatcat  
132001 gcctgtggat gatgggggtt gttatgatga aactttacgc cacaaaggac tcttgccatc  
132061 tgatttactt gatgagttta taggacttca tttttcaag gctaatagaaa aaattttaga  
132121 gcttttagga aatcatcttt tacattcttc taaattcata cactcctatc cattttgttg  
132181 gagaaccac aaacctgtga tttatagagc gactaagcaa tggtttattt taatggatga  
132241 gccaaaacta aagggtaaaa ctttaagaga atgtgctaaa gagcaaattt taaaaacaaa  
132301 attttatcca caaagcggag taaaaagaat aggcctctatg gtgaaaaatc gtcctgattg  
132361 gtgtatttca agacaaagag attgggggac gcctatagct ttctttaggg acaaaagcac  
132421 taaagaagtg atttttgatg ccgagctttt tgattttgta gcaaatatat ttgaaaaaca  
132481 tggagcagat gcttgggtggg aatttgaaat taaagactta ataccgcaaa attcaaaaata  
132541 caacgcagac aacttggaaa aagtttatga ttttttagat gtttggtttg atagtggaag  
132601 tacttggaaat gcagttttta atagcggaaat ctatgatgca ggagagaaga gagcaagtat  
132661 gtatctagaa ggaagcgatc agcatagagg ttggtttcaa agctctttgc ttgtaggaac  
132721 agctatcaat gaatttgctc cttatgaaag tatcttaacc catggcttta ccacggatga  
132781 aaaagggcaa aaaatgtcaa aatccaaagg taatgttata gctcctgagt atgtagctaa  
132841 aacttatggg gtggaaattt taagactttg gatacttttg agtgattatt ctactgattt  
132901 aaaaatttca gataatatct taaaacaagt aggcgagcaa taccgaaaaa taagaaatac  
132961 tataagattt ttacttgcaa ataccaatga cttggaaaat ttagaagtag aggaatttag  
133021 ttttatagat aaatggatac tgactcgtgc tacacgcgta tttaaaagtg ctaaagaaaa  
133081 tttcttagct tatgaatttg caaaaggctt taatgtgctt ttaaatttct taagtctga  
133141 tttaaagtga atttatcttg atataagcaa agacagactt tattgtgatg ctaaaaatag  
133201 caaacgcaga aaatccgcac aagtggcaat ggctttaatc gctagagaac ttttaaattt  
133261 attagctcca aatttaactt atagtgtaga tgaggcttta gagcatgcta atagcttgat  
133321 aaaagcgat gctaaagatg tttttgattt gagcttggaa gaaaaatttg aatatgattt  
133381 tagtatagat gatgaatttt tattgagtgt gcgtgagaaa ttctttgaaa atatcgatat  
133441 attgaaaaaa gataaagtga tcaaatcaac tttagaactt aatcttgaca cgaattcaaa  
133501 acttttaaat tctataccta aagaagaatt aaatgatttg tttatggtaa gttttgatga  
133561 aaaattacaa ggtgaagttt tgtgtgaatt tgaagtggag aatgagagct ttaggatcat  
133621 aaaagccacg ctttgcaaat gtcctagatg ttggaaagta gaaagtgcta aagaagatga  
133681 gccttgcatg cgttgcgctg aggtttttaa acatgcttga taatcctatc ccaaatcca  
133741 ttattatcgc tactatagca atcaccgctg tttttgtgc agtggcgggt gtttttatta  
133801 aaaatttggc aaagaaacag aaggaaaaag aatgataacc ttaaaagaag ctttgaaata  
133861 ctctaaagaa gagcttgaag atctaaaaaa agaactcaat gataaagcta aaaaagaaaa  
133921 taaaataggt gcttatatag agcaattttt aggtaaagac ttaagcgatg ggggtgaagg  
133981 tatactata gcgattaagg ataatatcag tgtaaaagac tgggaattaa cttgtgcaag  
134041 taaaatttta caaggatatg tagctcctta tgatgctact gctattaaga atttaagatc  
134101 taaaggtttt agtccttatg gacgaaccaa tatggatgaa tttgctatgg gaagttcgag  
134161 tgcgacctcg ttttatggaa aaaccttaa tcctttaaatt tttgctcgcg ttccaggcgg

134221 ctcaagtggc ggtagtgctg ctgctgtagc aggtggtttg gctttggcta gtttgggtag  
134281 tgatacgggt ggttcagtc gtcaaccggc tgctttttgt ggttgcgtgg gctttaagcc  
134341 tagctatgga agagtgagtc gatatgggct tgcttcttat tcttcaagcc ttgatcaaat  
134401 aggcgtttta acgcaaaatg tagaagatgc agctattctt tatgatgcta ttgctgggta  
134461 tgataaaatg gatagcacia gtgcgaaagt agattttaca cctactgctc ctaatttaaa  
134521 tgacagagaaa aaattaagaa ttgctgtgat agaaaattat gtcaatgaag caagcactga  
134581 agtaaaagcc gcgcttttaa aaagtataga gatgttaaaa gcaaatggac atgaaattgt  
134641 ttataaaaaat atgcttgatt ctaaatttga tattgcagct tattatatca tcgcaacagc  
134701 tgaagcgagt gcaaatttaa gtcgttatga tgggggtgctg tatggaaaaac gctcaciaaaa  
134761 tacagaaaaat cttaaagata tgtatatcaa tactcgtagc gaaggttttg gcgaagaagt  
134821 aaaaagaaga attttactag gaacctttgt ttttaagcagt ggttattatg atgcttatta  
134881 tataaaagca caaaaagcta gggcttttat caaggcaaaa tatgaagaaa tattacaaga  
134941 tgctgatctt atttttatgc ctgtaactcc tacaactgca tttgaattca acgcaaaaaa  
135001 aagccctatg gaagtatatt tagaagatat ttatactatt tctttaaatt tggcagggct  
135061 tgggggtatt agtgtgcctg tgggcaagga taaagaaggg cttaatatct cagcccagct  
135121 tatttgcaag gcttatgatg agcaaacctt gctagatgga gctttaagtt tagaaaaaat  
135181 tataaaggaa aataaatgaa tataattaag cgtgctttga cttttgagga tgtactttta  
135241 cgcccttgct attccgaggt tttacctaaa caagtaaaaa ttcataccaa gcttactaaa  
135301 aacatcactt taaatatgcc tttaatctct gctgctatgg atacagtaac agagcacaga  
135361 gctgctatca tgatggcaag acttggcggg cttgggtgtaa ttcataaaaa tatggatata  
135421 gcttcgcagg taagagaagt taaaagagtg aaaaaaagtg aaagcggggg gatcatagat  
135481 cctatttttg taagccctaa agcaagcgtg gcagaagctt tggaaatcat ggcagagtat  
135541 agaatttcag gaggctcctgt gatagatagc gatagaaaac tcataggcat tcttaccat  
135601 cgtgatttga gatttgaaaa cgattattca aatttggttg aaaatgtgat gactaaggct  
135661 ctttaaatca cagctcctaa aggatgtact ctgatgatg cagagaaaaat ttttagcaaa  
135721 aacaaggtag aaaaacttcc tatagttgat gagcaaggac gcttagaagg acttatcacc  
135781 ataaaagatc ttaaaaaacg caaagaatat ccagatgcaa ataaagatag ttttgggaaga  
135841 ttgctgctag cagctgctgag tggagtaggg caaatggatc gaggtagatgc tttggtagaa  
135901 gctggagtag atgctgtagt tcttgattca gcgcatgggc attctaaagg tatcattgat  
135961 acagtaaaaa gcgttaaaga aaaatatcca aatttggatt taatcgcggg taatatcgtc  
136021 accgcagctg ctgcaaaagc actttgtgaa gcagggtgctg atgctgttaa agtaggtatt  
136081 ggcccaggaa gtatttgtac tacgcgtatc gtttcaggag tgggggtgcc acaaatttca  
136141 gctattgatg agtgtgctat ggaagctaaa aaatatggtg ttcctgtgat cgctgatgga  
136201 gggattaagt attcaggtga tattgcaaag gctttggcag ctggcgcgag ttcgatcatg  
136261 ataggttctc ttttagcagg tacagatgag agtccagggt agctttttac ctatcaagga  
136321 agacaatata aatcctaccg tggatggga tcgataggag ctatgcaaaa aggaagtcca  
136381 gatagatatt ttcagcaagg aactgcacia gataaattag ttcctgaagg tatagaagga  
136441 cgcgtgcctt atgtaggaag tataaaaaat gtcgtacatc agcttttagg agggcttcgt  
136501 tcttctatgg gttatgtggg tgctaaagat atagaagatt ttcaagcaag agctgaattt  
136561 gttgaaatca caagtgcggg acttaaagaa agccatgttc acgatgtaac gataaccac  
136621 gaagcaccia attataaggt aaatcaatga gttttgaaga aaacttaaaa aatgcaaacg  
136681 agtccttaga aaagctcaat gataaagaac taagcttaga tgaaagtgtg aaaatttaca  
136741 aagaaggatt aaaaagcatt gaaaaagcaa ggcttgctct tgaaaaagca aggcttgaag  
136801 tggagcatat cgatgagtaa gattgctgct ttgcaatttc caaccttggc attgagtga  
136861 tcaaggcttg attattatct aaaagcttct aaggatagtg gagcaaatat agtcgttttg  
136921 ggcgaatatg tgcttaatag cttttttaca gagcttttgg tcatgcaaaa gtctatgatt  
136981 aaagagcaaa gcgaagccaa aaaagaaagc ttgattaggc ttgctaaaaa atatgagctt  
137041 gaaatcatcg ctccttatat cagtgtagaa accaagggat ataaaaagct ttgcttaag  
137101 gttgctccaa atcatatcaa aacctatgag caacaagttt taatgcctta taatcactgg  
137161 aatgaagaaa aattttttag caataaaacc aataagggca atttaaaact ttttactttt  
137221 aattatgata aattaaaatg tgctttactt tttggttttg aggtgcattt tgatattttt  
137281 tggcaacaaa ttatggctaa aaagatcgat ttagttatcg ttcctagtgc ttgcacctt  
137341 gaaagtaagc aaagatggga agagctttta aaaacaagag cttttttaaa ttctacaaat  
137401 atcttaagag taaatcgcat aggcaccaca aaagatgaat ggaattttta tgggtgatag

137461 atgcttatca atgcttttgg ggaaatagaa agtaggctag gttctgaaga ggaaatgctt  
137521 attgtagagc ctaaaaaagc agatgaagct agaaaaatth gggcttttga taagatagtt  
137581 aaaggacttt aaagattgaa tttatactaa gcttatttaa ataagcttag tgtgaattht  
137641 ataattcttg ttttttgta attataaacc aaaatattta ttgcttattt ataatttaaa  
137701 ttttttatta taataaactt ttttaatatg ggcttaaata atgaaaaata tccattttat  
137761 cggttaggtg gtataggaat ttccgctttt gaaaaattag taggattaag caatacttta  
137821 aatgtaggag tagataataa agtaagaata gctaaaaact ctcatgagtt tgtaggagaa  
137881 aacaaagata tagaaatagg tgcaaatcaa aatactatta tccataaaga tgagataagg  
137941 aatgtgaagg gaaataaaaa ggaaatgggt gaggggcatt atgatattaa tataaaagaa  
138001 acattaaaaa tccaacaga aaaagaaact tctataagaa gcaaaaaata tctactaatc  
138061 accaccaatg cttcaatggg ctttgaaaca gataaaaaata atacctttgt atctaataat  
138121 tcattatcgc aaacaaaaac agattgtgaa gtaaaagcag gcaatcaaat cctccatcaa  
138181 gtaggtgata ctcaaattgc taccaagaaa gattgtgtta taattaaagc aggtggagta  
138241 gaagtgatta tagactctaa tggacttgtg gttaaagggt gagagcttaa ggcagagtaa  
138301 tggaagcact caatcaaaaa aatagtttaa acattagact ttttagctct aataatattc  
138361 ttctgcataa tcaagaatth aagctttatg aaatagcaca gagcaataaa agtgaaatca  
138421 agactattht tacaactaat agaataggag aagctcattt aaatgctagt gaaatthtta  
138481 gtaaagaagc acaaaactth gaattaatth taaaccaatc tagtgtttat aaaaacaaac  
138541 ctatctataa tcatagatth ttattaagaa gttatgagta tgggcattgg tgtgaaataa  
138601 aatthgaaag aaaggcagat aaagtttcta taaactctat taggctaaaa tccaaagaat  
138661 ttaccttaga aaataatgaa aaaatagtgc gtaatthtcta tactthtgggt gatatagtag  
138721 aatthgaaagc tathtatgag gatacaaaaa tcaaaagaaga gcaaathtaa tggggttatg  
138781 tthttattca ggataaaaaac accttagata agttaaacaa aaaccaatta actaatgaca  
138841 aaaaggaaag thctthtgctt gatgaagaaa thttaaaaga thgtthttat attgaaaaag  
138901 aagaagataa agccctatta tcttcttcta tcatthtatag acatthtagaa aacaacaaag  
138961 cttattgtgg aaaaactctt agthtgcaac taccaaacc taaagacaca caagagcaaa  
139021 aagcactatt agtctthtgc tataaagaaa taccaatta taatgcctct tatcttataa  
139081 gaattaatga ttatccacaa attaccattg attgcactct agcagaaaca ctaagagcac  
139141 atacaacaa agatgaaatc tcaaggcttg gttggggagt aagctatatc tgtcaaagat  
139201 tatggcatga taatccaagt gatgctaaag aathaaaaga thtaacctth agaagctcta  
139261 cttcgcaaga thttatagat actatcccta atgaaacaat gaaaacaata gtaaaggaga  
139321 tattgcctag agtagagatg caacaatthaa agactgacaa cacaaaatca agagataaag  
139381 caagatthta tgcggaatta gattgggata atthttacat gaagthcccc ataatgcaag  
139441 agctaaaggg cgagtatatg aatctcaaaa agctthtttg agaagaatct gattthcaaa  
139501 acaattcga agatthtctt aatgatactt tactagatat aaaaaacatt aaaaatacac  
139561 aagaatatac aatggcactc aatatccaag caatgaaaga gaataagacg aagaatgcag  
139621 aagctthtaa gctatataaa aaagaggaaa cactcccaga aactcataaa gctataaaag  
139681 acttacaana accatcagat attatcgata atagthttata thttcaaagg thtgatataa  
139741 aaaatgatgt gthtttaccg catttaggct taagthaaatt tgatgcattt cattgcaaa  
139801 actccataca acatgaaaa gaagthtttag ataaattcca ctctaacca aaatacaagc  
139861 agaathttgc tctatactct atcgcagggg cthttaatat cttatatata ccaagcctta  
139921 tacaatcac gagagttaca agattctata attaccattc thttatagct gcgtgcaaaa  
139981 aggtgcgtgc thttatcatt gatactgtga atthtaataa taatggtagc gatcagccta  
140041 thggggcatg ggattatgag aaggtaggat thgattthata taattcgata atgcaatacc  
140101 gaaatacaaa atthcattth aaatatacct caccaaaatc atthctthtt cccttatata  
140161 attcagactt tctaaaaaca aaacagtatt thaatctagg cttagatthc thtttatata  
140221 gctctacatt thtgatagat gattthtagtc atacgcaaat gcaagatact gctthtatag  
140281 thggggaagta agatgthttt tgctggthgt gattatgagc cthttatata thggcttagt  
140341 cttattgcat actatthtct accctthtat tgtctgacgc thttattgta thaatataag  
140401 cctcaatatg tgaatcttac tctgcatatt ggagcttcag thgtgtthata cttagctata  
140461 thggtaatat thgtcgatac aactattatc agctthtttg aaathtttca aatgthttta  
140521 atcccatta tcttgcaaat tatacatctt acctthtata tctatgctat tatctatact  
140581 tathttgata tgcaaaagat thcattthaca aagagactag gcagatatat cgtthcattt  
140641 thttattggga thggactact tatcctthct thtgtaatga thgtatgctat thgatattat

```

140701 atcagctcat ggtgtgatag atattatcctt aaaatcgatg agagaaatga ggcgattcgc
140761 actataactt tttatgttct tgttgtgggtt tttcccagta taattgcact actccttagc
140821 tatatcctct ataaaaatca taagtcattt tttactaaga ttctatatag aatccttatct
140881 atgataggca aggataaacc ataatgcaaa aacttatata tcaaaaccac gactaccaac
140941 aatatacaat ccaacaaaca cagaacattt tcaatcttgg ttgtgatttt agaaacctta
141001 cttctacatt taaggatata gaagtttatt ctttttcaat gccaatccaa ataaggataa
141061 ttgaatgagt cgttcttctt ttcttgaatt tatcttttat actattgttt tatatgggat
141121 tgtattgctt atttggagtg tgatatacag agtaaagcg ataatacata agaaagattt
141181 tataaaaatat tggagtattt atagtgtggc atattggata gtggctatac ttttttggag
141241 tttttttaag agtttaggga tttatagtat ttatgaatgg cttactctct atctaactc
141301 tataatacta tgtattgtat ccgtcatata ttttgcaatc ttttagattct ttgggtgatca
141361 aaaaatataa agaatcctt atctaacaaa tgaaaagata ggaatagcta tagtaagctt
141421 tttacatfff ttgctttcac ccataccatc tctagcattt ttttatataa tacagagact
141481 tgtgagtttt ttagtaaggc taattagtga attacatata ttatcgtagt acctctaagt
141541 tagattttta actaagctct aaagaaagat caaaccaagt tatagctctt tatgccctct
141601 ctggtaaatt tcaaatctat tatgtgttag atagctttga agtagaaaga atgaatgaaa
141661 aagaaatagt tatctatcct acacaatttg aatcgtgggtg ctaggtatta tcgactacca
141721 aaatacgcaa tctcacttta attctgtggg atttctttgc ctttgggata ttttttaaga
141781 aaatftttta tgcaatcaca tttaaatcta gctccaaacg aatfttcatg agtattttct
141841 ctctttgtat tcatagtagc ctgtgcgttg ctattgcgtg gatgttaata ttttttcaaa
141901 caaattatga tacccaagca cttcaatfff ggcttagatt tctttttata tagctctata
141961 ttttttagata ttgtgctaga ggagtagtta ttatgtttga agcgacaaaa atacggagta
142021 aaataaaggg gtttttatgc aaaagatttt aatagtttta ggaatfttct taatgctaag
142081 cattagtgcct aatgcagaaa ctaacaataa ggctaactcc actcatgcaa cacattftaa
142141 caaatggctt gggacttata cattacaaga aaatctttat atggggagct ttacaataaa
142201 aaagtgtgat aagtttaata tttgtgaagc tagatatgag gctatcctaa ataaaagtga
142261 atttaatgat a

```

//

```

LOCUS      DMACINML_7                139699 bp    DNA        linear      16-DEC-2020
DEFINITION Campylobacter species strain strain.
ACCESSION
VERSION
KEYWORDS   .
SOURCE     Campylobacter species
  ORGANISM Campylobacter species
            Unclassified.
COMMENT    Annotated using prokka 1.13 from
            https://github.com/tseemann/prokka.
FEATURES   Location/Qualifiers
  source   1..139699
            /organism="Campylobacter species"
            /mol_type="genomic DNA"
            /strain="strain"
  gene     complement(375..1181)
            /locus_tag="DMACINML_01223"
  CDS     complement(375..1181)
            /locus_tag="DMACINML_01223"
            /inference="ab initio prediction:Prodigal:2.6"
            /codon_start=1
            /transl_table=11
            /product="hypothetical protein"
            /protein_id="Prokka:DMACINML_01223"
            /translation="MKYDNKMLKKGDKILSKNVTIKISRPSGITTYKSTKGISIIIRQE
            ILDDIVLKFCKLDFSAQYGLKTEEFITYGVFDDLLFTFEHYLEEEDDCISFSVSFR

```



VKSMKSDEILCKIVGLDQPNLDFKILNQHGVRSPFSPFKSMEFTNLNDLKQSGLDMP  
 SDSYHSFLKAYKESIDTLIEAFKDTTNTIKGLYDFIYNEENEDTIWQDRITLMQVLL  
 LIELNQKEQALKILKNNQKAIERDFTIEYDDGSIEVFDVLKHSIENDLC"

gene complement(1728..2288)  
 /locus\_tag="DMACINML\_01224"

CDS complement(1728..2288)  
 /locus\_tag="DMACINML\_01224"  
 /inference="ab initio prediction:Prodigal:2.6"  
 /inference="similar to AA sequence:RefSeq:APA79483.1"  
 /codon\_start=1  
 /transl\_table=11  
 /product="putative secreted protein"  
 /protein\_id="Prokka:DMACINML\_01224"  
 /translation="MTREQAELIIKEEKLIDTDWYPSYKHSGEYHLMWFDSNNNKYE  
 TFYVGERGSVSLNYSFDSEKEAIDKMLQMDYEQKYFSVNEDYSMQNRKEVALRIIKEE  
 NLEVIWYDEALKPLCAGIKHDKQRDKYISFITNAKAEIIEYRSIEFDGDRYSETFERM  
 LNDEDIALYALINRARMIKQNRISFT"

gene complement(2364..2762)  
 /locus\_tag="DMACINML\_01225"

CDS complement(2364..2762)  
 /locus\_tag="DMACINML\_01225"  
 /inference="ab initio prediction:Prodigal:2.6"  
 /inference="similar to AA sequence:RefSeq:CKG87555.1"  
 /codon\_start=1  
 /transl\_table=11  
 /product="hypothetical protein"  
 /protein\_id="Prokka:DMACINML\_01225"  
 /translation="MGKIAKLAPIFWRIVSPKFINLMQDLIKDCVQYLDVEIRSQEIN  
 YYDCKIMHVTKSLEALDYEHVYTYMGDNDEYLSITKAVLKKSKLDGSHIFRIKDDEI  
 PVFVSNEFRKRVRENNLLGFSFSEVLVCE"

gene 3018..3383  
 /locus\_tag="DMACINML\_01226"

CDS 3018..3383  
 /locus\_tag="DMACINML\_01226"  
 /inference="ab initio prediction:Prodigal:2.6"  
 /codon\_start=1  
 /transl\_table=11  
 /product="hypothetical protein"  
 /protein\_id="Prokka:DMACINML\_01226"  
 /translation="MDRKKIKQSIKEWILEINRQEALPKGIVALNFGFLFEPYGIELIG  
 AENYDENDDDWACEEDFVPKLRICPALEIPSDLEWESVLELMIDILKELVMEKHIKL  
 LQVPHITGFCGDLEIIK"

gene complement(3376..3501)  
 /locus\_tag="DMACINML\_01227"

CDS complement(3376..3501)  
 /locus\_tag="DMACINML\_01227"  
 /inference="ab initio prediction:Prodigal:2.6"  
 /codon\_start=1  
 /transl\_table=11  
 /product="hypothetical protein"  
 /protein\_id="Prokka:DMACINML\_01227"  
 /translation="MAQDLDTQLLDAIEALRKAPLNEWDAKKSAILIILLKSLFI"

gene 3814..4347  
 /locus\_tag="DMACINML\_01228"

CDS 3814..4347  
 /locus\_tag="DMACINML\_01228"  
 /inference="ab initio prediction:Prodigal:2.6"  
 /codon\_start=1  
 /transl\_table=11  
 /product="hypothetical protein"  
 /protein\_id="Prokka:DMACINML\_01228"  
 /translation="MLSLKFKIQEHLQCKNCLKINPEEDTKFCIFYGKDLNHPARQRL  
 DYIYSKNPAIIIVALLAKVAKADDKIITKDLKSFISLLDKTEMFYSKEYSGFRNTYAS  
 IFEHEKNQGRSIYELCTSARFYEKEIDFLICLLLDLIYYDAKMSANENALMENIIIGL  
 GLNLIKFREVKLKQEKL"

gene 4390..5976  
 /locus\_tag="DMACINML\_01229"

CDS 4390..5976  
 /locus\_tag="DMACINML\_01229"  
 /inference="ab initio prediction:Prodigal:2.6"  
 /inference="similar to AA sequence:RefSeq:A0H52524.1"  
 /codon\_start=1  
 /transl\_table=11  
 /product="WG beta repeat domain-containing protein"  
 /protein\_id="Prokka:DMACINML\_01229"  
 /translation="MLICNHCNTKNLDAAKFCKEKGNSDLYDPQAEKLEQERRLEEE  
 KRKMAQEEKEKRLKQRKEFITKHKSKIIISMVGFLLIASLSIYQYFYGGKYSKAYISK  
 PEEKCDDGDGKACFASIFVSGDLIKVEIDGQWSFLDKNGEFIAPKPEFDSVSTFSEGLA  
 RVGLNGKSGFIDKSGKIIAKPEFDDVGVFSEGLARVELNGKMGFIDKSGEFAIKPEFD  
 NVGDFSEGLAAALLNGKMGFIDKSGKIAIKPEFDRVSYFREGLAPALLNEKMGFIDKS  
 GEFAIKPEFDDVWNFSEGLARVELNGKYGFIDKSGKIIAKPEFDKVVDFREGLAKVWL  
 NGKIGFIDKSGEFAIKPEFDGIRDFSEGLAEVELNGKYGFIDKSGKIIAKPEFDDISY  
 FSEGLAPVKLNKMGFIDKSGEFAIKPEFDGVSFYFREGLAPALLNEKIGFIDKSGEFA  
 IKPEFDDIRNFSEGLAPALLNEKMGFIDKSGEFIAPKPEFDDVGVDFKKGLAKVELNGKY  
 GFIDKSGKIVIEPKFDDIDY"

gene complement(5973..6161)  
 /locus\_tag="DMACINML\_01230"

CDS complement(5973..6161)  
 /locus\_tag="DMACINML\_01230"  
 /inference="ab initio prediction:Prodigal:2.6"  
 /codon\_start=1  
 /transl\_table=11  
 /product="hypothetical protein"  
 /protein\_id="Prokka:DMACINML\_01230"  
 /translation="MIKSNSNKKILKNVYLANAELRKKASYERKIAKLEIEKILAKKS  
 TQAFVYVLEDKEEIIIEI"

gene 6305..8215  
 /locus\_tag="DMACINML\_01231"

CDS 6305..8215  
 /locus\_tag="DMACINML\_01231"  
 /inference="ab initio prediction:Prodigal:2.6"  
 /inference="similar to AA sequence:RefSeq:A0H52524.1"  
 /codon\_start=1  
 /transl\_table=11  
 /product="WG beta repeat domain-containing protein"  
 /protein\_id="Prokka:DMACINML\_01231"  
 /translation="MAQEEKEKRLKQRKEFITKHKSKIIISMVGFLLIASLSIYQYFY  
 GGKYSRVYISKLEEKCHYDDENSCKMLQTIYKEKCDGDDGKACFASIFVSGDLIKVKI

```

DGQWSFLDENGEFI AKPEFDSVSTFSEGLARVELNEKIGFIDKSGKFI AKPEFDDIRN
FSEGLARVGLNGKWGFIDKSGKII AKPEFDDVGFNEGLAKVKLNGKIGFIDKSGEFI
VKPEFDDAWSFSKELAAVKLNGKIGFIDKSGKII AKPEFDDAWDFSEGLAAVELNGKY
GFIDKSGEFAIKPEFDDAGVFSEGLAPALLNEKWGFIDKSGEFAIKPEFDDAWSFREG
LAKVKLNGKYGFIDKSGEFAIKPEFDKVVDFREGLAEVGLNGKIGFIN KSGEFI AKPE
FDDISYFSEGLAKVKLNGKIGFIDKSGKII AKPEFDDVGFSEGLAKVWLNKIGFIN
KSGEFI AKPEFDDVGFREGLAKVWLNKIGFIDKSGKII AKPEFDNVDDFREELA AV
KLNRYGFIDKSGEFAIKPEFDRVSYFSEGLAAVKLNKRWGFIDKSGEFAIKPEFDDI
RNFSEGLAPALLNEKWGFIDKSGKII VKPEFDYVWDFREGLAEVGLNGKYGFIDKSGK
IVIEPKFDYIVY"
gene      complement(8212..8559)
          /locus_tag="DMACINML_01232"
CDS      complement(8212..8559)
          /locus_tag="DMACINML_01232"
          /inference="ab initio prediction:Prodigal:2.6"
          /inference="similar to AA sequence:RefSeq:CJD42_9020"
          /codon_start=1
          /transl_table=11
          /product="hypothetical protein"
          /protein_id="Prokka:DMACINML_01232"
          /translation="MSGKFRHFLNHDDFEKLFKRIKNLLANAQFQKLIENKLLKEQA
LSFQGEIKQLDLLALGEDEAIIIDYKTGLNFNKHKEQVLLYKEAIEKILTKKSTQAF
LVVLEDKVEIIEI"
gene      8592..8879
          /locus_tag="DMACINML_01233"
CDS      8592..8879
          /locus_tag="DMACINML_01233"
          /inference="ab initio prediction:Prodigal:2.6"
          /codon_start=1
          /transl_table=11
          /product="hypothetical protein"
          /protein_id="Prokka:DMACINML_01233"
          /translation="MEALNFGLFEPYGI ELIGAENYDENDDDWACEEDFVPKLRICPA
LEIPSDLEWESVLELMIDILKELVMELKHIKLLQVPHITTFCDGDLEIIK"
gene      complement(8995..11601)
          /locus_tag="DMACINML_01234"
CDS      complement(8995..11601)
          /locus_tag="DMACINML_01234"
          /inference="ab initio prediction:Prodigal:2.6"
          /codon_start=1
          /transl_table=11
          /product="hypothetical protein"
          /protein_id="Prokka:DMACINML_01234"
          /translation="MAQDLDTQLLDAIEALRKAPLSEWDAKKSAIL ELFSKGAKIPPH
IIENLETYLSDL EQEYWDDRAVYAGRSVKDSDEYELFNILSKLNNAKDKKSLNALFK
ATKSTGVIHTPKNKAELKLIKDKKIYLGIDIDISKIKSFKDLFKNSRRRDFSGIETWD
TSKVTDMQSCFEDA EHFHNIESWNVSCVESMESMFKGAEAFNQPLDKWDISNVGNFE
KMFAYATNFNQSLDKWDISNVGNFEKMFAYATNFNQNLESWGEKIDFEKSYLKGI FWS
SGIEKNNNYP SWYRSCNEEGIYQPKCKEFLKELLTDNISPSKIDTSLIIDMSELVFVA
SFKETQWFDGIESWDVSSVKYMYNMFAGCKNFNSDISNWNVSSVVMMSGMFENCINFR
QDLSKWSVSSKVLLESTNIFKNCPTNMLEIWDKKHLDFLNAKNTNATNKNAYFPKTT
DDLKMLCEKEELYLGIDITSLITDMSRI FHNSQRKDFSGIELWDTSNVVCMKLMFFGA
KHFHNIESWDVSKVENMESMFEGAKAFNQPLDKWNLSLQELKEMFRDCCNFNQNL
SWEFSKEGIKNAIENKNNIFHGTKLENNFPKWLQATQKIPESVKEICDLLKEMCDEY"

```

EKGKAFFKSYDRALQGLKTLLEKKKVNDKDLARIYALAMGEREFYKENTIGNCPLEL  
LELIKKSATDPKIALKIGQKDKQRMSFLDNAASVGRADIVKILFDCGEVIEGMNGLKG  
LYYHRRQISQESMIEILRLYKANGLKDTDLDFQYGSYLYLALAHGIFSKEEIEKELGE  
PLLECVLKEYMPEGSQYIEWEYFASKDLSQEEKDFIVQDIKERKSSRKVEDYLQRYN  
AILEKLGAKGIL"

gene

complement(12053..16456)  
/locus\_tag="DMACINML\_01235"

CDS

complement(12053..16456)  
/locus\_tag="DMACINML\_01235"  
/inference="ab initio prediction:Prodigal:2.6"  
/inference="similar to AA sequence:RefSeq:CKG87579.1"  
/codon\_start=1  
/transl\_table=11  
/product="hypothetical protein"  
/protein\_id="Prokka:DMACINML\_01235"  
/translation="MHYTSYEKNKITFFEIENTDENFLDTFMKIMQKSPFSVEIEKDK  
QIPSFQKDAYTMQIIQNSDEVIRILRMGGVCVWCYKDGKTTIIFDSIHPMCGYILEND  
FCNLQEFLKGEINLEEEEDGYEDDEDYDFNEDYELEEDDEEIELNYNRDDEEYL  
EDEEDSIKSNSSPFGSFALSTNFGAENLKVSLDFQTLAEEMSKHYAYTQEELKELGE  
LRQRKALKLRATLLEQKAFRRVCKLSLKEFQKLSAKELKAYQELINKELIRVVKELL  
FCEYASSQKDKINVIAFHSALRPIANDSENIALREFYNRSITPTKDGKTHLNETKTYL  
INLVSAGAKVDRDLANLAMQSANSYTSLSYQRLQNKDKNISDEKALRQIQSLPRHKML  
SSINLILQACVYQNYQRIDALSQIQDELKEPWSDEEYIEMFVIKHGKYPKLLNYKQI  
DSSLNDMQREEIAQNLLSKALSCNAKPMNSYKAKENFNQDSKKDFSSPLKMTENTES  
TNTQDSKLSILFLHKQPTRSPSSLKEDEKEAIKKIFELKSVTEISQTHLNALDDLLDS  
LIKNLGAYTTASHFLSKEQKQALLESRAFQWLFDDVDDESIFEYMYIHTLFYGSEAF  
STRDSVNLMLLDKPFQVTWENFILLCTGVKIKKSYIKHIKNAKNIYKYMQLSLAQN  
YNENFSSFKDKAYTTSSGEKIVLNNLRALQNTKDFLHSSNTYRLLKQVLKLLKELQGV  
EERTRHLKDYPYIKFQECEFRAELFIYAFIDEKIEFLAYESLDDKKAHIDERVAKIVQ  
NLEIGSVHVDIEPIIEFLGLSPSIYLLNSRIDDTTFKLESTQYRLKINLRDFSNAKNC  
DEAKKAFDLFLERCNISQIIFAKTTEITNKLLELGEGERNIGRIGIAGEKIDDMSY  
NIVGFKFYNTYRDDVALIRIKSDEALEFLIGILQEQQKYNKTSYQIIVGEYDTQKID  
GALWLYACSYKEQEFIDKAHYQYFIGDTESFCHDFLEDKNYFDFDKYSKIYLGYCMKN  
KVIKKLDWLRGSVFDDKHFTKNKKKFCNIYTKQEDSTLILFNTKGYEYFKFPKFIYD  
FLESKNAKFSTLTKGLNYGFFSLEKELDLKTPKITQELARQIIEQEELFSVSWYERK  
KEHLGEYMLGIWWDKSVQKYEVRTGERASIEHEKDFEREDEALQYLLVQNYIELYKG  
VKRKGINEENLKKSLQDLQYPIWYNEPLKVCAGIRRENNVYVSFMTSDSAQIIEYK  
TLVFNEESVALYALLNRTRILHNLPKQEMLGEILNMNNADDMLFKAIMTSDFFLTKA  
LEQGANINGKVDEKQELSKYAKEDNICEEGAYYYGLALSQVLSGITLDNEKFSKEELL  
KENEQAFNILYAMRDLKPSDEAQEYAKDVLNDTHADWYNYAYKWADEFYKGFDEE  
AIFAWLRENKGLRYFETLIKDLGFDLELKE"

gene

complement(16868..18553)  
/locus\_tag="DMACINML\_01236"

CDS

complement(16868..18553)  
/locus\_tag="DMACINML\_01236"  
/inference="ab initio prediction:Prodigal:2.6"  
/codon\_start=1  
/transl\_table=11  
/product="hypothetical protein"  
/protein\_id="Prokka:DMACINML\_01236"  
/translation="MDYIEKLSTQKKIDSKKRAKILELCKDKQNYQILSIEQYKQELL  
EDYECKLKHKSLEQIERLCKYDFCDTIDFRYIAMYNIIDKGYTQKNVEFLDDVLYTE  
SIKHSFGRGELKWEIILGANNFALFPKVYPLKYMQNCTPYLSSFYLTRAMIFYNDFTH  
KNKALEELTRNLNVKSNSKTYKDECALYIAMINKDFEAIISLGLLELLCKNAKKSKEYGT

```

DIFKTSMDFKALALWNL MRYAWGDEAYKIDLPKEENFPLALHLYQKERNYALGKPCIH
FEPPLDLCNLFLEIDL PIMIYGEEYGRKTCYELDERASENLVIEKVYEQA KSKNIKV
YNDHKGKLT LQIQKRL EDEARENNDLEDPFYLFKKNYVLYLIQVLEIDTQEFSDIYA
FLLNHNYKSPCFTL KLRFN TLSNAKRVAQSKQIPLQKAKWEYENFLDSVLETIDLYET
DNTFQKLTEPYIKEIQAKKLRFE EEWNECRTTDLKYYFKLV TQALNYIQNSGFMEQKF
GRQIPFIIFSQIEPQNKLES LNIQANGKELVKEFLGSKESGLARAF LNKKIKKE"
gene 18657..21272
      /locus_tag="DMACINML_01237"
CDS 18657..21272
     /locus_tag="DMACINML_01237"
     /inference="ab initio prediction:Prodigal:2.6"
     /codon_start=1
     /transl_table=11
     /product="hypothetical protein"
     /protein_id="Prokka:DMACINML_01237"
     /translation="MELTKEKVKSLGLDTKEEVVIPEDIKVIEGETFRYNKNIRKVIL
NEGLEVIKSSAFAYCKSLEEIIIFPTSLKTIERTAFDECSSLKNLNFNEGLEVIENYAF
SECESLEEIILPDSLKSIGEYAFKKCSSLKNLKFKEGLEVIESSAFASCETLEEIIIFP
TSLKEIGYEA FKECSSLKS VKLNEGLEIIGHRAF GGCKSLEEVI LPNSLKFIEHWVFS
DCSSLKS VKLNEGLEVIENYAFSECESLEEIILPDSLKSIGEYAFKKCSSLKNLKFKE
GLEVIESSAFASCETLEEIIIFPTSLKEIGYEA FKECSSLKS VKLNEGLEIIGHRAF GG
CKSLEEVI LPNSLKFIEHWVFSDCSSLKS VKLNEGLEVIENYAFSECESLEEIILPDS
LKEIREDAF LEVYNL KRIHISK NHEYFGYENNVLYDKKSKFVI AVANI QESISFPECI
KKIGHHKFAGSSTLEEIIIFPTSLKEIERYAFEDCSSIKSLKFNEGLEVIKKNYAFSGCQ
SLEEISLPDSLKEIREGAF LEVYNL KRIYISK NHEYFGYENNVLYNKKKRKSVIAITN
ANEGITFPKYITAIPEDI FKNPNLSKVVFENKNYKISEEQYFAERLRESIRAHQKEFA
LNKAKKEKVAEII SVSFDGILQEIAKNYGV EFIIESKKNQEKIVCILKIEKHTKILT
TIKIKNPRFKEQFESFVKLVADKESTFESLQDFTKKHKNISFNKVFALHSYIPFIKLL
QPDKEFLSLGLENLRVKIPQGTEVIPNKA FYKLSLAFVELNDDLKEIDLQAFY GCKS
LGEITLPNSVTTIGWQAFKESGIKQINLPESIKKISSWIFANCNSLQV VYGTKDSLAK
KLA KSLGVKYIEIQE"
gene 21312..23375
      /locus_tag="DMACINML_01238"
CDS 21312..23375
     /locus_tag="DMACINML_01238"
     /inference="ab initio prediction:Prodigal:2.6"
     /codon_start=1
     /transl_table=11
     /product="hypothetical protein"
     /protein_id="Prokka:DMACINML_01238"
     /translation="MNLTEEKVKSLGLDTKEEVVIPKDIKVIEKDTFKYNKNIRKVIL
NEGLEVIEKYAFRNCE SLEEISFPNSLKSIGELAFSECSSLKKLNLNEGLESIGSRAF
LGCESLEEISLPDSLKEMWASAF LKVYTLKRIHISK NHKYFGYENNVLYNKEGKFVIA
VANI QESMSFPECIEIIGYEA FIECSSLKKLHFNEGLEIIGENAFYKCKSLEEINFPT
SLKTIERTAFDKCSSLKS LKFNEGLEVIEKHA FRNCESLEEISLPDSLKEIGEGAF LR
VYKLKHIHISK NHEYFSYENNILYDKKKKSVIAITNASDGITFPEYIKAIPQDIFKNP
NL SKVAFENKNYRISERECYSKGVNEAIS AHLKGYM FNKAKKEKVAEIMSVSFE GTLQ
EIAKNYGV ECSIETKKCDQEKIVCILQFQQRTKFLTTIKIKNPSFKEEFESFVKLIVD
KESTFESLQNF TKNKNIRHSRAFALNHCI PYVKFSKLEKAF LSSNLKDLRVQIPQDV
ESIPEEALGNIKPLVYVKISEGVVRIEKSAFEFCNRLREVELPSTLAYIGNSAFSCCY
DLEQINIPNSVTHIGEEAFYCCNSLKNVLPNSVTHIGKAAFEFCRSLKSVVLPNKLK
EIEEGVFKYAGLESITIPASVEPLKKASKSFYECPLKVIYGT KDSLAKKVAEELNTQY
IEIQE"
gene 23385..24455

```

/gene="bssE"  
 /locus\_tag="DMACINML\_01239"  
 CDS 23385..24455  
 /gene="bssE"  
 /locus\_tag="DMACINML\_01239"  
 /inference="ab initio prediction:Prodigal:2.6"  
 /inference="similar to AA sequence:UniProtKB:Q8VVE4"  
 /codon\_start=1  
 /transl\_table=11  
 /product="Putative chaperone BssE"  
 /protein\_id="Prokka:DMACINML\_01239"  
 /translation="MGVKINTTELKKILEITPSEQNIMLVGKHGIGKSQIIQEHTKE  
 GLKVVILFLGQMSDPGLIGLPHKNEKSGHTEFIPPFWFPLDDTPIVLFDELNRARP  
 EILQSVMDLTLNKRLAGRSLPKGSRVISAVNFGDEYQLSDLPALTSRFNIYEFAPSI  
 EEWLLWADGAKIDSRIIDFITENPELLDTQEGIEDFGLDKFPDRRAWVRVSSIIKEIE  
 DISSDIYKKAICGIVGIRAGVKFVETYKGNKLISASEILLHFTKVKQKLDKYKILDFT  
 KINDSLFRYIENKNYQSEAKEIAKNFELYFDYLQKKKANEVLGHFTNLVFSQTYPKV  
 ASFVMIHTPSLQQKIISFVSSL"  
 gene 24470..25720  
 /locus\_tag="DMACINML\_01240"  
 CDS 24470..25720  
 /locus\_tag="DMACINML\_01240"  
 /inference="ab initio prediction:Prodigal:2.6"  
 /codon\_start=1  
 /transl\_table=11  
 /product="hypothetical protein"  
 /protein\_id="Prokka:DMACINML\_01240"  
 /translation="MDLKQKFQKIIDSWFLSEPFLFEIYCTHTLKVSSLEVPMRSGKG  
 LIEYDKELCQDLSQNALEEFKLEVFRIALNHPYQRQPINANSVALYLASTITITDNC  
 SFNLNLPKPEHFKLEENCAFEVYRKLLEILPKEESEISGDEDTDEKQDLQGFESAS  
 PSDGTNENQDIENQDIQDFESMSLMDLNL SAIK SCTQNWQDDETQAE LIQSIVKNAL  
 RNAK SFGTISGDFIGLLELSLKAKMDYRRYLRAFRHSILSSKRRLVRNKPSRRYGFAY  
 FGSTYEFSTKLLVAVDVSGSISDEALQKFFYIINRFFKYGIERLDVLQFDTEIKGEMT  
 TLKKAQKIVKVQGRGGTNFEPVIQYEAHKEYDGLIIFSDGYAPPVNAKNSRPKLFV  
 ENFEQYSDFLENPLPKGSKCTYLT"  
 gene complement(25745..25957)  
 /locus\_tag="DMACINML\_01241"  
 CDS complement(25745..25957)  
 /locus\_tag="DMACINML\_01241"  
 /inference="ab initio prediction:Prodigal:2.6"  
 /codon\_start=1  
 /transl\_table=11  
 /product="hypothetical protein"  
 /protein\_id="Prokka:DMACINML\_01241"  
 /translation="MSEKWQSLSMFISLEVSVEVTELEEINKRDFSGIEKWNMGNVKE  
 IRYMFYSSPMQENPPKWKYKGVTCCKC"  
 gene 26201..27340  
 /locus\_tag="DMACINML\_01242"  
 CDS 26201..27340  
 /locus\_tag="DMACINML\_01242"  
 /inference="ab initio prediction:Prodigal:2.6"  
 /inference="similar to AA sequence:RefSeq:A0H52524.1"  
 /codon\_start=1  
 /transl\_table=11

```

/product="WG beta repeat domain-containing protein"
/protein_id="Prokka:DMACINML_01242"
/translation="MAQEEKEKRLKQRKEFITKHKSKIIIISMVGFLLIASLSIYQYFY
GGKYSRVYISKLEEKDDGDGKACFASIFVSGDLIKVEIDGQWSFLDENGEEIIAKPEF
DSVSTFSEELVNVWLNKKGWGFVDKSGEFAIKPKFDDAWSFREGLAKVKLNKKGWGFIDK
SGEFIAPKPEFDDVGFSEGLVAVELNGKYGFIDKSGEFAIKPEFNYAGVFSEGLAPAL
LNEKWWGFIDKSGEFAIKPEFDDAWSFREGLARVKLNRYGFIDKSGEFAIMPEFGRVW
DFSEGLAKVWLNKKGWGFIDKSGKIAIKPEFDDVGFSEGLARVWLNRYGFIDKSGEF
AIKPEFDDVWDFKKGLAKVELNGKYGFIDKSGKIVIEPKFDYIVY"
gene complement(27337..27525)
/locus_tag="DMACINML_01243"
CDS complement(27337..27525)
/locus_tag="DMACINML_01243"
/inference="ab initio prediction:Prodigal:2.6"
/codon_start=1
/transl_table=11
/product="hypothetical protein"
/protein_id="Prokka:DMACINML_01243"
/translation="MIKSNSNKKILKNVYLANAELRKKASYERKMAKLEIEKILAKKS
TQAFVYVLEDKVEIEI"
gene 27711..29417
/locus_tag="DMACINML_01244"
CDS 27711..29417
/locus_tag="DMACINML_01244"
/inference="ab initio prediction:Prodigal:2.6"
/inference="similar to AA sequence:RefSeq:A0H52524.1"
/codon_start=1
/transl_table=11
/product="WG beta repeat domain-containing protein"
/protein_id="Prokka:DMACINML_01244"
/translation="MAQEEKEKRLKQRKEFITKHKSKIIIISMVGFLLIASLSIYQYFY
GGKYSKVYISKLEEKCHYDDENSCKMLQTIYKEKDDGDGKACFASIFVSGDLIKVKI
DGQWSFLDENGEEIAKPEFDGVSTFSEGLARVGLNGKIGFIDKSGKIVIKPEFDNVGD
FREGLAPALLNGKIGFIDKSGKIIAKPEFDDIWFSEGLAAVKLNKKGWGFIDKSGKFA
IEPKFDSGEYFSEGLAAVELNGKIGFIDKSGEFAIKPEFDDIWFSEGLAAVKLNKKGW
GFIDKSGEFAIKPEFDYVWDFREGLAAVKLNKKGWGFIDKSGKIIAKPEFDDVEDFSEG
LAKVELNGKYGFIDKSGKIIAKPEFDKIWDFREELAAVKLNKKGWGFIDKSGKIIAKPE
FDNVGVFSEGLAAVELNGKKGWGFIDKSGKIIAKPEFDDVWVNFSEGLAAVKLNKKGWGFID
KSGKIIAKPEFDDVEDFSEGLAKVELNGKKGWGFIDKSGEFAIKPEFDNVGDFSEGLAEV
ELNRKWWGFIDKSGEFAIKPEFDDVWDFKKGLAKVELNGKYGFIDKSGKIVIEPKFDI
DY"
gene complement(29414..32176)
/locus_tag="DMACINML_01245"
CDS complement(29414..32176)
/locus_tag="DMACINML_01245"
/EC_number="3.6.1.-"
/inference="ab initio prediction:Prodigal:2.6"
/inference="similar to AA sequence:RefSeq:CAL35588.1"
/codon_start=1
/transl_table=11
/product="putative helicase"
/protein_id="Prokka:DMACINML_01245"
/translation="MKFKPFLALEASAGSGKTFALSVRFVALILQGAKINEILALTFT
KKAANEMQKRIIDTFLNLEKESKKGECKELCELLGCEEDELILLRDKKKQEFRLQVLK

```

IGTFDSFFSRILRAFALNLGLSSDFDTSEEKLDVRAVFLKLLNRQELKDLAYYKVSLE  
DNHDFFELEKIFYENAYFKECVRIPNPSKASINQAYDELRVYCLSLDHVKGKYLCTH  
FKDEVLQLSQFAKSDLNLTGAPKYLQDLESDAQFSQKRKAFIKALNAYAKELEEYK  
IANLMNLLSHFSKAKDIIQKDKNILSFSDISRRVLDLIRSDFKDMIYFRLDGYISHLL  
IDEFQDTSVVQYQILRPLIAELVSGEGVKKNRTFFYVGDKKQSIYRFRKGKKEFDLL  
QTEFKQIQKDQLTINYRSKQILVDFVNKTFQSKIKDYTPQLSLESKGGFVRVIESQE  
IKVDKDQAKEIQDKTLEALLEQLKFLKSKNIAYYDDICILCWKNNDADMILDFLHEQDI  
PAFTQSNILLENKACVRVLLLEYAKYCIFGDEFYLFHFLKEMLGFEPKLLKLDLAKSAVQ  
NVLYLIKELKLDLNDMALIQFIEYAKSKDDFLKLLFEPCTLKIMSEQNRGVNIMTVHK  
SKGLEFDHVILLDSLSKNNPNKNTIMLEYDIDQGWELHIKDSYRKATQSEYKAFIDK  
ITKADYEDDINKLYVAFTRAKDSLIIKRNASFQNGNYSYLNMTLDIEIQELGEIEI  
QTNDTHLPQKESFQALMEFEKIPLQDIERKENTSSDEIYFGNAFHFMQNLKLPQGEN  
FDILCQKVSQKFRHFLNHDDFEKLFKRIKNNLANAQFQKLIENKLLKEQALSQGEI  
KQLDLLALGEDEAIIIDYKTGLNFKHKEQVLLYKEAIEKILAKKSTQAFVYVLEDK  
VEIIEI"

gene

complement(32173..34539)  
/locus\_tag="DMACINML\_01246"

CDS

complement(32173..34539)  
/locus\_tag="DMACINML\_01246"  
/inference="ab initio prediction:Prodigal:2.6"  
/inference="similar to AA sequence:RefSeq:CAL35589.1"  
/note="hypothetical protein Cj1482c"  
/codon\_start=1  
/transl\_table=11  
/product="hypothetical protein"  
/protein\_id="Prokka:DMACINML\_01246"

/translation="MILRIFSSSRKIKEYQEKAKAKNALLDSAFLVSDFLDRVCVWNF  
FKASSYESLLMQEACLKSKDLEKKGISAEFFNFKLNNEYLFSSFKELSSEKKSIIQD  
LKNNDYYATYNEHLEILDEVYTNLLLLKQHNLVYDDLSLAKDYKLNLDLNEYESIYY  
DLQGFLSKFEEDLLCEISKIKDTIIGFKTSKFNLEYLLELDFLKDIIHLELDMFYEVNL  
SQKKILKQEKLSHPDILVKLKAFLRSLQCAFVMDNISNFVRAGIDPEKIAVITPDES  
FCELLKLFKNNMLNFASGVSIKESLFYQKIKALYNGANSDAFIYKTDENYFEQEKSI  
FDYHNTLLHYELQFEDFRARFDQICDLQYFENLIHSFLKDESQELMNLVQKELYFIK  
DLLKNKSLKLELMQLFFMQLDQIRLSHVGGGKVTVMGLLESRGLSFDGVIILDFNED  
FVPKRSINELFLNNEVRKAGLISYERRENLRQLYENLMRNAKLSISFVNEEQTR  
SRFLDELDFNFEEKTPSKAYLNALKLDYQGVRLNLPKAPVLKHDIFEKELSFSR  
LNLFLYQKRTYFYRYILELPEARALSDESRAKNQGNFIHKMLELYYKNYSKNNFNLQI  
FNDLLEQEYQKYGISELELEIFKLFKFIQFAKNEEHFKLGYRVIEQEEHHKALNIQN  
HTIRLKGIVDRIDKLEDKHFIIIDYKSGKVPKSFQLAFYKALYDENAIAKFDLNQMQ  
FIEEAKSLDELKECLKDLLEQREEEIEFENDKDEYCPYKIIYKDFR"

gene

complement(34536..35060)  
/locus\_tag="DMACINML\_01247"

CDS

complement(34536..35060)  
/locus\_tag="DMACINML\_01247"  
/inference="ab initio prediction:Prodigal:2.6"  
/inference="similar to AA sequence:RefSeq:CAL35590.1"  
/codon\_start=1  
/transl\_table=11  
/product="putative lipoprotein"

/protein\_id="Prokka:DMACINML\_01247"  
/translation="MLKSKTFFWPGYILISIFAIVVACIATIVVASNYPVYEDDFYFD  
SYQNVENNFNVIQKQEQFDALFKIEFQNDKVDLIGKRKIASYTIADSYLAKFKITT  
LSDKANTQNLKSEILLTRPHTREFDQKLLGQIQDGVLSVSLPQLEKGRWQLKIKLSTE  
DEIIGFFSYELNAQ"



gene complement(35053..35643)  
/locus\_tag="DMACINML\_01248"

CDS complement(35053..35643)  
/locus\_tag="DMACINML\_01248"  
/inference="ab initio prediction:Prodigal:2.6"  
/inference="similar to AA sequence:RefSeq:CAL35591.1"  
/codon\_start=1  
/transl\_table=11  
/product="putative membrane protein"  
/protein\_id="Prokka:DMACINML\_01248"  
/translation="MRKILQDGF LAIFLFFLPVQILALEPVVFNENVLNQKVVEINL  
IGKELQEKSGIFAGVAIGDKSDFQTLDDLHKQLPQSYVLLVLSKNSHKVDIIGSKGAL  
ALIDKEAILSPYPGTGSILPILATNKGDIYNAAILNGYGDIVDRLAQARGIELQHSIG  
NANRDTINILRILYGFICFALLYAQRMRKRKNA"

gene complement(35640..35741)  
/locus\_tag="DMACINML\_01249"

CDS complement(35640..35741)  
/locus\_tag="DMACINML\_01249"  
/inference="ab initio prediction:Prodigal:2.6"  
/inference="similar to AA sequence:RefSeq:CAL35592.1"  
/codon\_start=1  
/transl\_table=11  
/product="putative periplasmic protein"  
/protein\_id="Prokka:DMACINML\_01249"  
/translation="MNKALEYLIVIGLVVTAITAWSVL TANHLHIG"

gene complement(35738..35959)  
/locus\_tag="DMACINML\_01250"

CDS complement(35738..35959)  
/locus\_tag="DMACINML\_01250"  
/inference="ab initio prediction:Prodigal:2.6"  
/inference="similar to AA sequence:RefSeq:CAL35593.1"  
/codon\_start=1  
/transl\_table=11  
/product="putative periplasmic protein"  
/protein\_id="Prokka:DMACINML\_01250"  
/translation="MENTNRCVFSLSGVTGMLIATVLLLA I LVGLTIWGLKAQQEVMQ  
QPYSLKDIQNVKMLGSKEQDHKSIGGVAQ"

gene complement(35959..36822)  
/gene="ccoP"

CDS complement(35959..36822)  
/gene="ccoP"  
/locus\_tag="DMACINML\_01251"  
/EC\_number="1.9.3.1"  
/inference="ab initio prediction:Prodigal:2.6"  
/inference="similar to AA sequence:RefSeq:CAL35594.1"  
/codon\_start=1  
/transl\_table=11  
/product="cb-type cytochrome C oxidase subunit III"  
/protein\_id="Prokka:DMACINML\_01251"  
/translation="MQWLNLDQNVNLLSFIGAILIILITLVVVGRMFKYMKEKKGEGE  
LSEHSWDDIGEYKNAIPTGWAVVFFLTIVWAIWYFLWGYPLNSYSSIGEYNEEVKTYN  
AKFEEKFQNLSTEDKIAMGQNI FLVQCSACHGITGDGINGKAQNLNIWGSE EGLVDAI  
KHGAKGMNFPGGEMPAADLGI SEEDIPAIAAYVAKELSAIKKTSNENLVAKGKEAYA"

```

TCAACHGEDGKGDGIFPDLTKYGSAAFVVDVLHSGKTGFIGAMPAFSILNDTQKEAV
GEYVISLSRGE"
gene      complement(36822..37085)
          /gene="ccoQ"
          /locus_tag="DMACINML_01252"
CDS      complement(36822..37085)
          /gene="ccoQ"
          /locus_tag="DMACINML_01252"
          /EC_number="1.9.3.1"
          /inference="ab initio prediction:Prodigal:2.6"
          /inference="similar to AA sequence:RefSeq:AAW36094.1"
          /codon_start=1
          /transl_table=11
          /product="cytochrome c oxidase, cbb3-type, subunit IV"
          /protein_id="Prokka:DMACINML_01252"
          /translation="MEHLAIIWNVIKNLVTLNLSAVQKHEWEIFQGYGFFLFVFMFLSI
VLSYWYHLRYAEKKGERNYKYANLALSDDIDDSVLESKRSA"
gene      complement(37090..37755)
          /gene="cco0"
          /locus_tag="DMACINML_01253"
CDS      complement(37090..37755)
          /gene="cco0"
          /locus_tag="DMACINML_01253"
          /EC_number="1.9.3.1"
          /inference="ab initio prediction:Prodigal:2.6"
          /inference="similar to AA sequence:RefSeq:CAL35596.1"
          /codon_start=1
          /transl_table=11
          /product="cb-type cytochrome C oxidase subunit II"
          /protein_id="Prokka:DMACINML_01253"
          /translation="MFSWLEKNPFFFAVAVFIVIAIYAGIIEVLPNFAENARPIEGKKP
YTVLQLAGRQIYIKDSCNACHSQLIRPFKSETDRYGMYSVSGEFAYDRPFLWGSKRTG
PDLMRVGNRYRTDWHENHMWDPVSVVPNSIMPAYKHMFKNNADMETAYAEALTVKKVF
NVPYDTENGTCLGTWEEAQAEIKAEQAIVDQMKNQEVKDAFARGEIKEIVALIAYLN
SLK"
gene      complement(37768..39234)
          /gene="ccoN"
          /locus_tag="DMACINML_01254"
CDS      complement(37768..39234)
          /gene="ccoN"
          /locus_tag="DMACINML_01254"
          /EC_number="1.9.3.1"
          /inference="ab initio prediction:Prodigal:2.6"
          /inference="similar to AA sequence:RefSeq:CAL35597.1"
          /codon_start=1
          /transl_table=11
          /product="cb-type cytochrome C oxidase subunit I"
          /protein_id="Prokka:DMACINML_01254"
          /translation="MHPGNALNYDYTVAKYFMFATILFGIIGMAIGTLIAFQMAYPNL
NYLAGEYATFSRLRPLHTSGVIFGFMLSGIWATWYYIGQVRLKVSMAESKFLMAIGKL
HFWLYMITMIIAVISL FAGVSTSKEYAELEWPLDILVVLIIWVLWGVSI FGLIGIRREK
TLYISLWYYIATFLGIAMLYL FNNMAVPTYFVAEMGKWWHSVSMYAGTNDALVQWWYG
HNAVAFVFTVGIIAQIYYFLPKESGQPIFSYKLSLFAFWGLMFVYLWAGGHHLIYSTV
PDWMQTMGSVFSIVLILPSWGSAINILLTMKGEWGQLRESPLIKFMILASTFYMFSTL

```

EGPILSIKSVNALAHFTDWIPGHVHDGTLGWVGFMTMAALYHMTPRIFRRELYSKSLM  
EAQFWIQTTGIVLYFASMWIAGITQGMMWRATDEYGNLLYSFIDTVVAIIPYYWIRAI  
GGLLYLIGFFMFTYNIYKSIACGKVLDPKEPKSASPMAA"

gene complement(39363..40031)  
/locus\_tag="DMACINML\_01255"

CDS complement(39363..40031)  
/locus\_tag="DMACINML\_01255"  
/inference="ab initio prediction:Prodigal:2.6"  
/inference="similar to AA sequence:RefSeq:CAL35598.1"  
/codon\_start=1  
/transl\_table=11  
/product="putative two-component regulator"  
/protein\_id="Prokka:DMACINML\_01255"  
/translation="MKELVILVVEDEVKIRESLVNLSSRYSKVIGAQNGDEGLKFKF  
KFKPDLIITDIAMPIMDGLDMSKEIKEIANDVPIVVLSAFSEKERLLRSIDIGIDKYL  
IKPVDIDELFKVLDYLVGEKIEANALVDISKEYQFNKTKRTLIYKGEIVLTKKELAF  
ISLLLKQPGVLVLHEDIKKNVWIGEHSVSDTAVRTFIKRVKVKGEKFIKNVPGLGYKI  
NIEN"

gene complement(40036..41250)  
/locus\_tag="DMACINML\_01256"

CDS complement(40036..41250)  
/locus\_tag="DMACINML\_01256"  
/inference="ab initio prediction:Prodigal:2.6"  
/inference="similar to AA sequence:RefSeq:CAL35599.1"  
/codon\_start=1  
/transl\_table=11  
/product="putative two-component sensor"  
/protein\_id="Prokka:DMACINML\_01256"  
/translation="MANSAAEQVLKAI EENIIFFKIDLQGIIDASEKFCKVSGYSKK  
ELIGKHHFILKHPDVKEDYINQLLEKLWQKEAYWVVFKNIDKLGKTFYLD AFLIPIVD  
KKGNLNEIAALS YDISNSFKLNEELVLNHAKLREISVNLEKIAKERKEEF AKLSKDFE  
YKLKVALEKNEKDTKKIYKEILNSSIEQMISDIAHQWRQPLNELGIAMFQMKQNVQDE  
KGFTEIYLQSKSTIKNMSETIDIFRTL FKNNEKKNHVS LREILNKVIGIAFETIEKQ  
QVNTRIISKTDYRVVAHENGLMRVFLNLIINSIEAFKTQKVKNII FSFKGKNYIKV  
KVRDNAGGV DENILDKIFQPYITTKHPSQGIGAGLYISKQIVESFGGKIQVKNIKDGA  
CFEIYLKLQEGN"

gene complement(41251..41922)  
/locus\_tag="DMACINML\_01257"

CDS complement(41251..41922)  
/locus\_tag="DMACINML\_01257"  
/inference="ab initio prediction:Prodigal:2.6"  
/inference="similar to AA sequence:RefSeq:CAL35600.1"  
/codon\_start=1  
/transl\_table=11  
/product="putative integral membrane protein"  
/protein\_id="Prokka:DMACINML\_01257"  
/translation="MNFLPLNFD FLAIFSVAF LSSFGHCYSMCGGFILAFMNLNSTHK  
NLFLLTFIYQLFRIFSYILLGIIFGIFGNLLAINAKIQSLSFFILGVFMVILGLSLIF  
RGKILAFIENRTFFEYFIKKI IKKSMGFKGVKSAMILGFANGFVPCGLVYFFLANAMS  
RQNVTESILVMLVFGLSTLPAMLFFVKISQYLGVLKVKVFNYSYFIIVAYGVGLAYM  
GFKAF"

gene complement(41919..43037)  
/gene="carA"  
/locus\_tag="DMACINML\_01258"

CDS complement(41919..43037)  
 /gene="carA"  
 /locus\_tag="DMACINML\_01258"  
 /EC\_number="6.3.5.5"  
 /inference="ab initio prediction:Prodigal:2.6"  
 /inference="similar to AA sequence:RefSeq:CAL35601.1"  
 /codon\_start=1  
 /transl\_table=11  
 /product="carbamoyl-phosphate synthase small chain"  
 /protein\_id="Prokka:DMACINML\_01258"  
 /translation="MKAYIYIENDIFLTAKAFGKGGTFFGELVFNTSLTGYQEIIISDP  
 SYAGQFIIFSMPEIGIVGTNENDNESKEIFASGVLNRELSPTFSNFRAQKSLQEYLEE  
 HGKIGVYGLDTRYLVKMLRDSGNLRVISTEISNKEELKAALEKSAKIDEINFVKEVS  
 TKKSYVHKHGVWNTTQSYNKAKKNTKKVAVIDYGVKANILNELVEVGLVEVFPYDT  
 KAEELIKLYQKGQIQGVFLSNGPGEPKILKQEITEIKKLAEAKIPMLGICLGHQLLSN  
 AFGYETYKMKFGQHGHPVINLENKSVEITAQNHNYNVPEELCEVAIITHRNLFQDN  
 VEGVKYKDYPPIISVQHHPPESSGPHESKYIFKEFMNLM"

gene complement(43041..43592)  
 /locus\_tag="DMACINML\_01259"

CDS complement(43041..43592)  
 /locus\_tag="DMACINML\_01259"  
 /inference="ab initio prediction:Prodigal:2.6"  
 /inference="similar to AA sequence:RefSeq:CAL35602.1"  
 /note="conserved hypothetical protein Cj1495c"  
 /codon\_start=1  
 /transl\_table=11  
 /product="hypothetical protein"  
 /protein\_id="Prokka:DMACINML\_01259"  
 /translation="MRIKLPHIPYITNKIMLDIAHSSFVEIKDNIKLNPCIKQILED  
 DLMNERKLDERVKELLEQQEDEMELMQVDRKNMFWLVKKKLAPEFSVILNSEDHRNHL  
 AHRILEELIENDYINRVVSENVRVKNLIFSSIDDYDKIYEKLEDEVYEKISNYKTKPVP  
 GSEYELIFEKLYQEELRKKGMF"

gene complement(43666..44184)  
 /locus\_tag="DMACINML\_01260"

CDS complement(43666..44184)  
 /locus\_tag="DMACINML\_01260"  
 /inference="ab initio prediction:Prodigal:2.6"  
 /inference="similar to AA sequence:RefSeq:ADN91630.1"  
 /codon\_start=1  
 /transl\_table=11  
 /product="hypothetical protein"  
 /protein\_id="Prokka:DMACINML\_01260"  
 /translation="MYKLLFLAFFINLAWGAEQDCEQYFEARKAQLELQTRFDEAR  
 QALEAYKASFEALQKERLEVLNQREAENVNATLAQIESLKEQNTKLLLEEQQKILNSINE  
 KTEGRIKEIYSQMKDTAIADVLQMDAEEASKIMLSLESRKISGVLSKMDPAKASELT  
 LLLKNMDNKNKSN"

gene complement(44177..44605)  
 /locus\_tag="DMACINML\_01261"

CDS complement(44177..44605)  
 /locus\_tag="DMACINML\_01261"  
 /inference="ab initio prediction:Prodigal:2.6"  
 /inference="similar to AA sequence:RefSeq:CAL35604.1"  
 /note="hypothetical protein Cj1497c"  
 /codon\_start=1

```

/transl_table=11
/product="hypothetical protein"
/protein_id="Prokka:DMACINML_01261"
/translation="MKSKEYNSVAKVRKQQLDKAQSNNLNAKQRQIENERLYELSRKEC
ESLSVLPSSGSIAELRSNLTMAQVGRDALARAKEKVELSKKEINHYYQFLYQKAHLDYE
KIKVLEAEEIKQKQKELAKIEEKILDEIAITRFLKGEKNV"
gene complement(44602..45852)
/gene="purA"
CDS /locus_tag="DMACINML_01262"
complement(44602..45852)
/gene="purA"
/locus_tag="DMACINML_01262"
/EC_number="6.3.4.4"
/inference="ab initio prediction:Prodigal:2.6"
/inference="similar to AA sequence:RefSeq:CAL35605.1"
/codon_start=1
/transl_table=11
/product="adenylosuccinate synthetase"
/protein_id="Prokka:DMACINML_01262"
/translation="MSKADIIVGIQWGDEGKGVVDKLCENYDYVCRSAGGHNAGHTI
WVNGVRYALHLMPSGVLHSRCINVIQNGVVVSEVLIEMAQFENLKGRLYISDRAHL
NLKHSLIDIAKEKLGKDAIGTTGKIGPSYADKINRTGHRVGE LLDPQRLHNALMK
DFEANKNYLEFLGIEIPNSDELLSDLKRFSEILTPFITDTRMLWKALDEDKVVLEGG
AQSMLDIDHGTYPYVTSSTISAGALTGLGLNPKEVGSIIIGIVKAYTTRVGNQAFPT
EDKGESGEKIAQIGKEIGVSTGRKRRCGWFDIAVKYARLNGLDALSLMKLDVLDGF
EKVKICRAYEYKGMIDYIPSDLENVKPIYEEMDGDWVKVFGIKDYDLLPENAKKYIAR
LEELCGVKIKYISTSPERDDTIIL"
gene complement(45875..45968)
/locus_tag="DMACINML_01263"
tRNA complement(45875..45968)
/locus_tag="DMACINML_01263"
/product="tRNA-Sec"
/inference="COORDINATES: profile:Aragorn:1.2"
/note="tRNA-Sec(tca)"
gene 46126..47337
/locus_tag="DMACINML_01264"
CDS 46126..47337
/locus_tag="DMACINML_01264"
/inference="ab initio prediction:Prodigal:2.6"
/inference="similar to AA sequence:RefSeq:CAL35606.1"
/codon_start=1
/transl_table=11
/product="putative integral membrane protein"
/protein_id="Prokka:DMACINML_01264"
/translation="MKSFKQKYLINFWDNSRAMITLGILSAVYFGIFGGVWAVTGEMT
RWGGFLELLGMDLNGYSYQKQNLNGTPLTRTDGIMLIGMFIGLICLAALWANKVKFR
LPASNIRIFQAIVGGILSGYGARLAFGCNLANFFTGLPYFSLHTWFFGVFVVLGIYLG
VKLCNTSFFKPKAKLECVNKENIPLVKQSSRTKFHFVVLGSILFVAFLIWFVYLVLVNG
NISTQSKQSLALALIFGFVFGFIISRQICFTACFRDLFLFGRENAIKGALIGMIIA
SLIAFAFILHGNSKLIELSPAIVAIGAFVFGFVIFAGGCECGWYRACEGQSHFMIV
GIANIIGTMILALTYDFLPSAFKEGVKINLLNEFGNLGGFFINLALFILMFACVLFYK
KHFFQKLNPKG"
gene 47341..47568
/locus_tag="DMACINML_01265"

```

CDS 47341..47568  
/locus\_tag="DMACINML\_01265"  
/inference="ab initio prediction:Prodigal:2.6"  
/inference="similar to AA sequence:RefSeq:CAL35607.1"  
/note="conserved hypothetical protein Cj1501"  
/codon\_start=1  
/transl\_table=11  
/product="hypothetical protein"  
/protein\_id="Prokka:DMACINML\_01265"  
/translation="MKITYTLNLEGEACPYPATLDALPQLKSGEILEVLCDCPQSI  
NSIPQDAKNRGFKILEIDQNGPTLRFLIQKP"

gene complement(47765..49246)  
/gene="putP"  
/locus\_tag="DMACINML\_01266"

CDS complement(47765..49246)  
/gene="putP"  
/locus\_tag="DMACINML\_01266"  
/inference="ab initio prediction:Prodigal:2.6"  
/inference="similar to AA sequence:RefSeq:CAL35608.1"  
/codon\_start=1  
/transl\_table=11  
/product="putative sodium/proline symporter"  
/protein\_id="Prokka:DMACINML\_01266"  
/translation="METVQINTPIAIFVAYAALMLYIGFYFYRQNKNTEDYFLGGRS  
LGPVVSALSAGASDMSGWLLMGLPGALYASGLIESYIAIGLSIGALLNWSFVAKRLRI  
YTSVIANSITIPDYFETRFDDDKHILRIVCAIVILIFFTFYVSSGLVGGAKLFEATFG  
IRYEYALTTGTLIIVAYTFLGGYKAVCWTDLLQGLLMMGALIVVPAVMLYHLGGFGEA  
MAVIEEIKPNALSMGEGIGALSIVSALAWGLGYFGQPILVRFMSIRSTKDIPTATFV  
GISWMVISLIGACFIGLLGIAYVHKFELTLQDPEKIFIVMSQLLFPWIAGILLSAIL  
AAIMSTASSQLLVSSSTIAEDFYKRIFNKEASNKTVMNLGRMGVLLVALVAFVISTDK  
ESSVLSIVAYAWAGFGASFGSVMLFSLFWSRMTRIGAILGMITGAVVVWLWKNYLAEL  
FNFPIYEIVPGFIAASAVIIITSLLTKVRPGTKAAYERMLKEL"

gene complement(49261..52767)  
/gene="putA"

CDS complement(49261..52767)  
/gene="putA"  
/locus\_tag="DMACINML\_01267"  
/EC\_number="1.5.5.2"  
/inference="ab initio prediction:Prodigal:2.6"  
/inference="similar to AA sequence:RefSeq:CAL35609.1"  
/codon\_start=1  
/transl\_table=11  
/product="putative proline  
dehydrogenase/delta-1-pyrroline-5-carboxylate  
dehydrogenase"  
/protein\_id="Prokka:DMACINML\_01267"  
/translation="MIQKSLALAEELQGKIEANISNSEKEFHAKMQKLLNPNENKVML  
IELLDRSFRCKDKRASFEHIEHTLNKYGIADFFSAFEKFLLSFNLFGKFAPNLSVPF  
FVKHLREDTKAMVLDANPSVLEPHMRKRKQDNITLNVNLIGEEVLGEAESKYRIQKY  
EEALKSSYITYISIKITTFISQINIIDFEYSKDEVKRLDHLALALEEKKQGVSKF  
INLDMEEFRDLELTVAAFMEVSFKFDIKAGIVLQAYIPDSYEYLLKLFASFKERVLKG  
MKPIKIRFVKGANMESEETIASQRGWELPTFYKKIDTDSNYNKMLDFVLEGDNYKYIN  
IGIASHNIFEIAYAYTRISEAGALDSFTFEMLEGMSLQCSYELSKMHDLILYAPVCDE"

```

AHFNNAIAYLVRRLDENTSEDNFMRYFFNLKVGDNWVQKELFLKSLEGIKTLDNST
HRTQDRNKAPNIVSAYESGVFNNESDTDFILPQNRAWAKVIRAKYENLENYDVMPVIG
DLEFDKNALNVLEVKDKIKDRVIGKAYLAGENEIKKALEVAKNSNFKNTSFDEIHAIL
AKAANLMRERRGDLIGLAALEVGKTFLEIDPEVSEAIDFTEFYPHSLRILREQNKNTQ
FSPKGIGVTIAPWNFPIGISVGTIAAPLAAGNVVIYKPSLSTLTGYMLCKCFWDAGI
SKDALIFLPSKGS DISKYLLVDEAVKFSILTGGEDTAYAMLKANPTLLL SAETGGKNA
TIVSKFADRDSA IKNIIHSAFNSGQKCSATSLLVLEEEVYEDEEFKKTLDVAAA SMA
VGNPF EFKNLGLTADKPSAKVEKALNELAPYEEWALKPQFLENNPYLMTPGIKYGTK
KGDFTHMNELFVPILSVMKAKDLKEAIEIVNSTGYGLTAGFESLDEREWYFHTHIEA
GNIYINKPTTGAI VLRQPFGGVKKSAIGFGRKVGIIYNYITQFLDINTNEADENLLNNE
LVKALEKIDLNTNEENKKALNNA ILMKSYAYHHRNEFSVKDYVNI RGEDNLF SYTK
IKNLAFRVCENDNLQDILGVIIAANILNIPLSVSYEENAKISLVKELCKAINLNLEIT
NESKAKFVSRLKNFERIRYHGKVSMEDEIYQEA AKKAKIIIREKPLLNGRFEFLFYHN
EKALSISFHRYGNL GIRALNHH"
gene      complement(52903..53829)
          /gene="selD"
          /locus_tag="DMACINML_01268"
CDS       complement(52903..53829)
          /gene="selD"
          /locus_tag="DMACINML_01268"
          /EC_number="2.7.9.3"
          /inference="ab initio prediction:Prodigal:2.6"
          /inference="similar to AA sequence:RefSeq:CAL35610.1"
          /codon_start=1
          /transl_table=11
          /product="putative selenide,water dikinase"
          /protein_id="Prokka:DMACINML_01268"
          /translation="MQTSPALLSDIGNNEDASVFQISPELALVQTLDFITPIVDSAYH
FGAIAAANALSDVFAMGAEVINALNIVGFDTCHELNLQELLQGANDKVQECGGIIV
GGHTIESGELFFGLSVTGK VHPKFFIANNTAKEGDLILLTKPLGTGILSTALKAQMLE
EKHLDRMLESMMSLNKSSQIALRFGVNSMSDVTGFGFLGHLREMLNDSISFMIFKNE
LPYLEGVKEYFDMGLIPGGAYKNLDFMQELYPSLNEEDLLLCDPQTSGLLIAIEEKK
ALECLKALEDENIKAKIVAKAVAKQDDRFLFS"
gene      complement(53933..54505)
          /locus_tag="DMACINML_01269"
CDS       complement(53933..54505)
          /locus_tag="DMACINML_01269"
          /inference="ab initio prediction:Prodigal:2.6"
          /inference="similar to AA sequence:RefSeq:CAL35611.1"
          /codon_start=1
          /transl_table=11
          /product="putative two-component response regulator
(SirA-like protein)"
          /protein_id="Prokka:DMACINML_01269"
          /translation="MRIDCRNLECPKPIVETKKALQNLQNN EILEIVLNSVISKNNVL
KFLASLNLHADIEENNEFYIRVKKQELDFSKASTDEYNVFLKTDKVGDKLGENLL
VGFLSTLKNVENIPSKILCVNESVFINVDESHRAHLAMKELEKLGVEIISCGACLEFF
GKSKELKIGSIGNAYEILNELCGKAKIITL"
gene      complement(54632..55363)
          /locus_tag="DMACINML_01270"
CDS       complement(54632..55363)
          /locus_tag="DMACINML_01270"
          /inference="ab initio prediction:Prodigal:2.6"
          /inference="similar to AA sequence:RefSeq:ADN91640.1"

```

```

/codon_start=1
/transl_table=11
/product="ModE repressor domain protein"
/protein_id="Prokka:DMACINML_01270"
/translation="MDKNKEILAYMKELLNSNEKLDCGTAFKIAKKFDVAIEEIGKIA
DINGIRIDNCELGQFGHLDFEKAKIEVLRKVEPSLDEKRRIFCKDARDIAKEGCGLKS
MRSALKAYKIDVKYQQLGCFKEKKGKQFVVRTKTWIENADGDLLFGKGKTELLELIGQ
TGSL LHASKLMGINYKKAWMHLQVLQKNSQEILVSSRQGRSKESGTKLTPRAMELMEN
YAILQKDIEEYANKRFKELFFKHKK"
gene complement(55356..56138)
/locus_tag="DMACINML_01271"
CDS complement(55356..56138)
/locus_tag="DMACINML_01271"
/inference="ab initio prediction:Prodigal:2.6"
/inference="similar to AA sequence:RefSeq:CAL35614.1"
/codon_start=1
/transl_table=11
/product="FdhD protein"
/protein_id="Prokka:DMACINML_01271"
/translation="MEPLFTTQILKYKGKDLFTCDTLVREIKLEIFINDEKVGALMA
TPVDEQALAVGYLMSENIIAKVSDIKSIETKDDGMSVHIKAKIDKENLAKLNAEGVVI
SGCGRAHTANIDPQSI EASKITS AVKFNKDEILKQMSEFYTQCDLYEKTGCVHTAKLF
VDKDTFFIGEDIAQHNTIDKALGKARLAGVELSKCFLMVSGRLSSEMVAKAVMHKIPV
LVSRTAPTCLGVMIAKFDLTLCGFARGENINIYSGENRING"
gene complement(56330..57262)
/locus_tag="DMACINML_01272"
CDS complement(56330..57262)
/locus_tag="DMACINML_01272"
/EC_number="1.2.1.2"
/inference="ab initio prediction:Prodigal:2.6"
/inference="similar to AA sequence:RefSeq:CAL35615.1"
/codon_start=1
/transl_table=11
/product="putative formate dehydrogenase, cytochrom B
subunit"
/protein_id="Prokka:DMACINML_01272"
/translation="MKKILITLLSTFVSLFAYGSERMGQDTQIWFHFRITNIPNYDTF
GKLWTTLQGEYIATIALIAIIAVLSAFALHYMVIGPKQFSDHGKKIYAFSLFERIFHF
IAAISWVILVPTGFVMMFGATFGGGVFVRVCKNLHAFATILFIISIIPMFLWWIKRML
PASYDIRWMMIVGGYLSKVKRPVPAGKFNFGQKSWYYIAVFGGFLMIITGGFMYFLDF
NSTAIQGLFGLTQIELLRLSAIIHNFLGIICAVFFGIHIYMAVFAIKGSIHSMVSGYK
EEEEVYILHSYWKELSSKKQIEPSFSYDPNVKI"
gene complement(57259..57900)
/locus_tag="DMACINML_01273"
CDS complement(57259..57900)
/locus_tag="DMACINML_01273"
/EC_number="1.2.1.2"
/inference="ab initio prediction:Prodigal:2.6"

```



```

/inference="similar to AA sequence:RefSeq:CAL35616.1"
/codon_start=1
/transl_table=11
/product="putative formate dehydrogenase iron-sulfur
subunit"
/protein_id="Prokka:DMACINML_01273"
/translation="MSKVNANLEKERLKFCDNERCIDNCGSCVACDEAHELPINIR
RRRVITLNEGVQKEVSTISCMHCDDAPCAIVCPVDCFYIRADGIVLHDKEICIGCG
YCLYACPGAPQFPKDSVFGNKGIMDKCTMCAGGPESTNSEKERELYQNRIAEKGVP
VCAAMCSTKALLVGESSKIEEIIYHSRLQSRGYGIANPSQSI EWKIA YIGKERL"
gene complement(57904..60144)
/gene="fdhA"
/locus_tag="DMACINML_01274"
CDS complement(57904..60144)
/gene="fdhA"
/locus_tag="DMACINML_01274"
/EC_number="1.2.1.2"
/inference="ab initio prediction:Prodigal:2.6"
/inference="similar to AA sequence:RefSeq:EAQ72956.1"
/codon_start=1
/transl_table=11
/product="formate dehydrogenase, alpha subunit,
selenocysteine-containing"
/protein_id="Prokka:DMACINML_01274"
/translation="MANTFGYGAMTNHLGDIQRSKCIIIIGANPAVNHPVGFHRFLKA
KEKGAKLIVDPRFTKSAKADIYARIRPGTDIAFMYGMLKIIIFDEGLEDTKYLDERV
FGIDKIREEAAKWTAEEVENVTGISKELLIQITHEVAKNKPTTLIWAMGLTQHTVGTG
NTRLAPIVQMV LGNIGKFGGGVNI LRGH DNVQ GASDMA CLSENLP GYYPLNEATW RYY
AKIWGV DYE WLLGNFVNKDW MHTGLSLARW WAAALNGKDGNDKVDNAGTPLKALVVM
GNGITSTAQQAKVKEGLEALELLVLADPFVNEAGIIAEKKDGIYLLPAATQFETSGSV
TATNRSGQWRFKVIDPLYESKEDQEILFELAKKLG FYEDFTKTLRDENGKIVWPENAT
REIARSVRSIGLNGWSPERLKKHTLHWDKFDEVTLE GKDELAGEYYGLPWPCWSDKHP
GSPVL YNTDIEVAKGGMGFRNNF GLEYEGENLLAKNAPINSPIDTGYPQITKDNI EKV
LGITLSAEEKEKMGAIWSYD DSNI IATKCI EKGI VPYGN AKARAVVWTFKDQIPLHRE
PLHSPRNDLVQKYPSFEDQKALYRVDTKFVSVQKAKDYSKEFPLNLVTARLVNLNGAG
MENRASYMLTRLTPMFCEINPELANEQKIKAGDMIWVHSPEGTKIHVRVKLNPGVAK
DMIFL PPHFTGVMQGV DLTHNFPKGT KPYASGESANTVTNYGYDIMCQIPETKGG LCR
ISKDGV"
gene complement(60166..60708)
/locus_tag="DMACINML_01275"
CDS complement(60166..60708)
/locus_tag="DMACINML_01275"
/inference="ab initio prediction:Prodigal:2.6"
/inference="similar to AA sequence:RefSeq:EAQ72607.1"
/codon_start=1
/transl_table=11
/product="formate dehydrogenase"
/protein_id="Prokka:DMACINML_01275"
/translation="MSSMNETIKLNRFSFLKMAALSSLASPLLARSETLREANDELK
EAYEGSQKIKSVCTACSVGCGIIAEVQNGVWLRQEIAQDHPVSSGGHCCKGSDMIDMV
RSHVRLKYPMKKENG EWKRISYEQAL SEIGEKLAGYRKENPESVMFLGSAKLNNEQAY
YIRKFAAFFGTNNVDHQARI"
gene complement(60708..60899)
/locus_tag="DMACINML_01276"

```

CDS complement(60708..60899)  
 /locus\_tag="DMACINML\_01276"  
 /inference="ab initio prediction:Prodigal:2.6"  
 /inference="similar to AA sequence:RefSeq:CAL35618.1"  
 /codon\_start=1  
 /transl\_table=11  
 /product="putative periplasmic protein"  
 /protein\_id="Prokka:DMACINML\_01276"  
 /translation="MKNRREFLKKSAIALGTASLLGGASVAFGQDEERKDLVRGKSKK  
 KEVLYQRSANWEKYMRAE"

sig\_peptide complement(60810..60899)  
 /locus\_tag="DMACINML\_01276"  
 /inference="ab initio prediction:SignalP:4.1"  
 /note="predicted cleavage at residue 30"

gene complement(60874..61575)  
 /locus\_tag="DMACINML\_01277"

CDS complement(60874..61575)  
 /locus\_tag="DMACINML\_01277"  
 /inference="ab initio prediction:Prodigal:2.6"  
 /inference="similar to AA sequence:RefSeq:CAL35619.1"  
 /note="hypothetical protein Cj1514c"  
 /codon\_start=1  
 /transl\_table=11  
 /product="hypothetical protein"  
 /protein\_id="Prokka:DMACINML\_01277"  
 /translation="MDLEKRLRLARSLYYQCLGELFVFSFSENRLCNLKAYLEAMQEGL  
 FDESLRTSFEILLSNLKDTQDLQAFYKEYDELFLALKNTIPMTFSYIEEGFENSKALL  
 NVRQILAKSTIRRNEKIFKEAEDSIGFCFILMSEFLKNKEDELAKALFEKVINQGIDE  
 FLMLIFSNSKAKLYKEIANIAVQFVEFERYCFELEKPTTKPSKKVQNDLSRSEFLRRE  
 ANKQRRSREKSQGIS"

gene complement(61908..63056)  
 /locus\_tag="DMACINML\_01278"

CDS complement(61908..63056)  
 /locus\_tag="DMACINML\_01278"  
 /inference="ab initio prediction:Prodigal:2.6"  
 /inference="similar to AA sequence:RefSeq:CAL35620.1"  
 /codon\_start=1  
 /transl\_table=11  
 /product="putative decarboxylase"  
 /protein\_id="Prokka:DMACINML\_01278"  
 /translation="MFYKFKQTPAYILEEDKLRKNCEILANVGEKSGAKVLLALKGFA  
 FSGAMKIVGEYLKGCTCSGLWETKFAKEYMDKEIHTYSPAFKEDEMSEIAHLSHHIVF  
 NSLYQFDKFKSLCTNNSLGLRCNLEFSFAPKELYNPCGKYSRLGILSKDLENDLSGV  
 EGLHFHALCEESADALEAVLKVFEEKFGKWIKQMKWVNFSGGHHITKQGYDIQKIITL  
 CKKFSDKYGVQVYLEPGEAVGWQSGVLVASVVDIVENEKRIAILDTSSEAHMPDTIIM  
 PYTSEVLNARILATRENEKISDLKENEFAYLLTGNTCLAGDVMGEYAFKEELKRGDRV  
 VFLDQIHYSIVKNTTFNGIRLPNLMLLNSKNELEMIREFSYKDYALRN"

gene 63180..64721  
 /locus\_tag="DMACINML\_01279"

CDS 63180..64721  
 /locus\_tag="DMACINML\_01279"  
 /inference="ab initio prediction:Prodigal:2.6"  
 /inference="similar to AA sequence:RefSeq:CAL35621.1"  
 /codon\_start=1

```

/transl_table=11
/product="putative periplasmic oxidoreductase"
/protein_id="Prokka:DMACINML_01279"
/translation="MNRRNFLKFNTLTLASIGMAYASPMHDMHSMHKNHSINHHLDTS
FINFAPKNLKLDPKQFPQGEILKALPLLKNESKEKNIFRATIEIKENHIELIKGKKT
LFYTYNGLIPAKIEVFEGDKLEILVKNELKEATTIHWHGVPVPPDQDQSPHPDPILAG
EERIYRFEIPQDSAGTYWYHPHPHFTTSKQVFMGLAGAFVIKAKKDALSHLKERDLMI
SDLRLDENAQIPNNLNLDWLNREGELVLINGQFKPKIKLTTNERIRIYNATAARYLN
LRIQGAKFILVGTGGGLIEKPIFKEELFLSPASRVEVLIHTPKDGEFILESTYYDRDK
MMVKEEPNTLFLADINLKKENLKLKPNLKNFKPSEEPKEFKEIIMSEDHMQMHGMKDK
SEDELKTALASMFLINGKSYDLKRVDLNSKIGVVEDWIVINKSHMDHPFHIGTQFEL
ISSKLNQKVKAEFRALRDTINVRPNEELRLRMKQDFKGLRMFCHILEHEDLGMGMN
LEVKE"
sig_peptide 63180..63248
/locus_tag="DMACINML_01279"
/inference="ab initio prediction:SignalP:4.1"
/note="predicted cleavage at residue 23"
gene 64723..64944
/gene="moaD"
CDS 64723..64944
/gene="moaD"
/locus_tag="DMACINML_01280"
/inference="ab initio prediction:Prodigal:2.6"
/inference="similar to AA sequence:RefSeq:CAL35622.1"
/codon_start=1
/transl_table=11
/product="putative molybdopterin converting factor,subunit
1"
/protein_id="Prokka:DMACINML_01280"
/translation="MVKVEFLGPINKPKLELNKLNKELKAILQEDESLEWLELCAV
SLNDEIVFDENTSCLKDGIKIALPPVCGG"
gene 64945..65391
/gene="moaE"
CDS 64945..65391
/gene="moaE"
/locus_tag="DMACINML_01281"
/inference="ab initio prediction:Prodigal:2.6"
/inference="similar to AA sequence:RefSeq:CAL35623.1"
/codon_start=1
/transl_table=11
/product="putative molybdopterin converting factor,subunit
2"
/protein_id="Prokka:DMACINML_01281"
/translation="MSEFVL TNNALDIPQIYAKWYEFKDKNCGALLTFCGIVREEGG
IEALSFDIYEPLLKKWFDEWQKRVEEVEGVI LLFAHSIGDVKTHESSYLAGVLSKQRKL
GLKLINEFVEDFKASAPIWKYDVINKQRIYAKERSSKLCGAGLLKS"
gene 65435..66625
/gene="moeA2"
CDS 65435..66625
/gene="moeA2"
/locus_tag="DMACINML_01282"

```

```

/inference="ab initio prediction:Prodigal:2.6"
/inference="similar to AA sequence:RefSeq:CAL35624.1"
/codon_start=1
/transl_table=11
/product="putative molybdopterin biosynthesis protein"
/protein_id="Prokka:DMACINML_01282"
/translation="MLMSYEESLKILHSHIKPFSRVEKIALTECLGRILAQDIKASKN
QPEFLTSAMDGYAIKFEDQDKPLKILGITPAGTMPEFKVENDTCVKFTTGLMSEGSD
TLVPVENVRVEKDTLFIKKVSKGFAVREIGENYKKDEILLKKGTKLSYSEIALLAEL
GFFHISVFIKPIIGVLSSGSEIKDLGEALENPAQIRSSNHIAIASLAKNLNCDTRVFP
LLKDDEKATFSTLESALQSCDILVTTGGVSMGDFDFLKKAIKEYELIIDKADIKPGRH
IKIAKANEKFIIALPGFPYSAMVMFNLYAREILNSWLLQPKDYICKAFLQGSYKKKTP
YLEFVACNVEFKNGRILANLEGKKEGSSAIINNLNKAALMIAPKECEILENESLVDI
IFMP"
gene complement(66642..67904)
/locus_tag="DMACINML_01283"
CDS complement(66642..67904)
/locus_tag="DMACINML_01283"
/inference="ab initio prediction:Prodigal:2.6"
/inference="similar to AA sequence:RefSeq:AHY40701.1"
/codon_start=1
/transl_table=11
/product="2-amino-4-hydroxy-6-
hydroxymethyl dihydropteridine pyrophosphokinase"
/protein_id="Prokka:DMACINML_01283"
/translation="MQNLHEILVQKKIKEIRFKAIASIVCGFLSIIPYLGVLFNLVSW
ILFFILLYDLKIYGGAKNLFKNFFIATGISFFGLVSTSSLFVILKPRIDFFGNFYFN
QDSIFSAITTFVLFIIALALIFPFLKAFYIEIARVTKQKYFIYAFNTCYLGLLTLII
GIGLVFLLASLIFWIFAWIKFEELDKQEFSHSQEMAVKTQKKVDFDLKWIKITMALF
LVLSFVIFGLKFTQRIIFQSIRRGFFYFEDYDKLIYNLVDIRYVVLVHIATFLALLSVF
LFCKKLTXYKMFYFLIWQVLVIFGWNLRFILKLIMGEDVFIENFILDKIIISIVCIII
AFFFFKALVQTTKEKLFYLVFAFFVCGEIASKIFYTFIGLLGSIRLQATIVDIIIFYIS
ISFTLAYFISFLIVWLSLKGQKEVKKVI"
gene 68213..69667
/locus_tag="DMACINML_01284"
CDS 68213..69667
/locus_tag="DMACINML_01284"
/inference="ab initio prediction:Prodigal:2.6"
/inference="similar to AA sequence:RefSeq:ADN91657.1"
/codon_start=1
/transl_table=11
/product="C4-dicarboxylate anaerobic carrier, putative"
/protein_id="Prokka:DMACINML_01284"
/translation="MPIFMICSTLLAVIVVAYYILKKYNPIFVFLLSGIILLIFAFYI
TGAPIPKAPSREHASFLDVLDSYAFITETFKSQLSGVGLIIMSVAGFAAYMKHINAS
AKLAFLANKPLGKIKNKYLILSGTFVGMALKIVISSYAGLLLLLLACIYPVLISLKI
RPITAVCVLSLIALDYGPKDGNSINMADMVQSDNVVGLFLNYQIYSVIAYVVVIAIL
IPFYFAWVDKRDKEKGINDEVEIPPIIDPKCPTFYILFPWLPVVFLFIAYFFTICKLD
VVTANFLSISLVFLVEFARHKARKLGEDMMVILKAMAEIFISVVSIIIAAGVFAEGI
KALGGINILANAVSDLGTGNFAWFGILLSITVLSFLVYFATVIMGSGIAAFNAFGKLA
PDIATKLGVAPITFVLPPIEIASCLGRAASPIAGGIIALAGFVKVDPMDIIRTTPLLL
IAMIINIIVAFYLAQSNPLPKENNIKTQTLKTN"
gene complement(69701..70681)
/locus_tag="DMACINML_01285"

```

CDS complement(69701..70681)  
 /locus\_tag="DMACINML\_01285"  
 /inference="ab initio prediction:Prodigal:2.6"  
 /inference="similar to AA sequence:RefSeq:ADN91658.1"  
 /codon\_start=1  
 /transl\_table=11  
 /product="hypothetical protein"  
 /protein\_id="Prokka:DMACINML\_01285"  
 /translation="MKILFHADGFGDLLVCFKALYAIAIKQLYPEYKLSLLTDGAMEGSF  
 LEKISFIDEVLIYKNDFFELIENKNPAIFISTRQGSYFKKLLLNIIQKICIVYPHFVS  
 ISSKKFTTFFPFRAKKHMSEIVLKLVRRAINAKHFDFKNFAKINFSKVNLLPYDTKLS  
 DDFFNKIDIEYEKIIGINAFSNYSEYVGCNFFIKDWIGLARQLSLKYPKYL FVLLNYD  
 KNSIQYNIDQSSNLKVFVNNASIASLVSISKKLDFLVTIDTGNLHLCDILQIPTLAFT  
 RELTAYRFGGGSYGGKFDHLIVKPGWQKEYRKIYETFTQKAEQNLKNSF"

gene complement(70729..71949)  
 /locus\_tag="DMACINML\_01286"

CDS complement(70729..71949)  
 /locus\_tag="DMACINML\_01286"  
 /inference="ab initio prediction:Prodigal:2.6"  
 /inference="similar to AA sequence:RefSeq:AHY40701.1"  
 /codon\_start=1  
 /transl\_table=11  
 /product="2-amino-4-hydroxy-6-hydroxymethyl dihydropteridine pyrophosphokinase"  
 /protein\_id="Prokka:DMACINML\_01286"  
 /translation="MQSLNEILVQKKIKEIRFKAIASIVCGFLSIIPYLGVLFNLVSV  
 ILFFILLYDLKIYGSANL FKNL FITAGIGFFGILINTSILFAMLPRTGIFGGLYFN  
 QDNIFMAIAIFLVLHFAILALIFPFLKAFYIEITRATKQKYFTYAFNTCYLGLLTLII  
 GIGVVFLLASLVFWILAWIKFKEFDEQELSNLEERLAKTQKKVDFDLKWKIKITMASF  
 IILNLLVLTFSFILEIIDFEDFRFYTKKTLFYTAIILALLSVFLFCKKIKNYKLFYI  
 FFIWQGLSVFGSYLLFIPALIINDILIAYGSLMMALNLCYIILAF LF FKT LVQITKEK  
 LFYLVFVFFVCIEILIIILTSFIFMMVDNYYIFTKSPIKTIIDNYILLFKVAYFISFLI  
 VWLNLKGQKNAKIC"

gene complement(71959..72666)  
 /gene="tam"  
 /locus\_tag="DMACINML\_01287"

CDS complement(71959..72666)  
 /gene="tam"  
 /locus\_tag="DMACINML\_01287"  
 /EC\_number="2.1.1.144"  
 /inference="ab initio prediction:Prodigal:2.6"  
 /inference="protein motif:HAMAP:MF\_00560"  
 /codon\_start=1  
 /transl\_table=11  
 /product="Trans-aconitate 2-methyltransferase"  
 /protein\_id="Prokka:DMACINML\_01287"  
 /translation="MYEILHTKAPKNELDFYLSYANKKDKILELMCGSGRFLLPFIES  
 GFDISGVDNSTSMLEKLEKAPNAKITKCDVLAYHSDDEFDYIFISSGSLCLITDINE  
 CKRLLRNLSFLKKGKLVFALDTIMTRCKDDSDYKISIKVKTEQNLDLILKNKNHYD  
 EISKTQFSPSIYELYDKDKLLQSEKMDFKIHLYDLKEIENILEELEFERFFIYSSFDK  
 KIAKDDKSEMFLCECIK"

gene complement(72699..73688)  
 /gene="purM"  
 /locus\_tag="DMACINML\_01288"

CDS complement(72699..73688)  
/gene="purM"  
/locus\_tag="DMACINML\_01288"  
/EC\_number="6.3.3.1"  
/inference="ab initio prediction:Prodigal:2.6"  
/inference="similar to AA sequence:RefSeq:CAL35629.1"  
/codon\_start=1  
/transl\_table=11  
/product="phosphoribosylformylglycinamide cyclo-ligase"  
/protein\_id="Prokka:DMACINML\_01288"  
/translation="MKISYEDAGVSIDNGNAFVEAIKPLVKETFNDKVVGGIGSFAGA  
FRMPSGFKNPVILGATDGVGTKLRLAIDAKKYDTIGQDLVAMCVNDLICNFATPLFFL  
DYYATAKLEVEVAKSVVAGIASGCKMANCALIGGETAEMPGMYAKDDFDLAGFAVGMA  
EEDEIDRSKFKVNGDILLALPSSGLHSNGYSLARKVLFESLKLKFDCKIEGKNLIDVL  
LEPTRIYVRDFLTLPYINALAHITGGGLVENLPRVLPKGMGATIRKHHKLTPEIFYT  
IGQAVEESEMYRSFNMVGLVMVVDPSNVSKVLENSDAFIIGEITINEGVVLE"

gene 73749..74354  
/gene="coaE"

CDS 73749..74354  
/gene="coaE"  
/locus\_tag="DMACINML\_01289"  
/EC\_number="2.7.1.24"  
/inference="ab initio prediction:Prodigal:2.6"  
/inference="similar to AA sequence:RefSeq:A0H52517.1"  
/codon\_start=1  
/transl\_table=11  
/product="dephospho-CoA kinase"  
/protein\_id="Prokka:DMACINML\_01289"  
/translation="MKNAFFVTASIACGKSTFIEIANS LGFKSISADSIAHEILDKYA  
LELAQIFSKFHKNLLKAEGKIDRKILGEIVFQNK EAKTILENFTHPKIRAKILEQMQ  
ILEQENKPFVEIPLFFESGAYDGLGKVIL IYAPKELSLKR IIQRDNL SLKAAKARLD  
SQMDIEEK LKADFIKNTGSYVDFRQECVKVIQNISKGQM"

gene 74351..75100  
/gene="dapF"

CDS 74351..75100  
/gene="dapF"  
/locus\_tag="DMACINML\_01290"  
/EC\_number="5.1.1.7"  
/inference="ab initio prediction:Prodigal:2.6"  
/inference="similar to AA sequence:RefSeq:A0H52518.1"  
/codon\_start=1  
/transl\_table=11  
/product="diaminopimelate epimerase"  
/protein\_id="Prokka:DMACINML\_01290"  
/translation="MKLYKYCASGNDFVIMNANEKKDRSALAKELCNRYEGIGADGFI  
VILPHEKYDFEWEFYNDGSTASMCNGSRAAAHFAHHINGIKPHMAFLT GAGVIKAN  
VDNNSVEVSLGKIKNIQEAFSECEKSWQLCDTGVPHLVHFCENLDEFDLK LCKQMREK  
YNANVNFVKVENDNTLKVRTFERGVEDETQACGTGMGACFYLAFLNKKIHNQARIIPK  
SGEELSFKFENEELFFKGKVR YCFEADYNFS"

gene 75075..75806  
/locus\_tag="DMACINML\_01291"

CDS 75075..75806

```

/locus_tag="DMACINML_01291"
/inference="ab initio prediction:Prodigal:2.6"
/inference="similar to AA sequence:RefSeq:A0H52519.1"
/codon_start=1
/transl_table=11
/product="putative FlgJ-related protein (Bax domain)"
/protein_id="Prokka:DMACINML_01291"
/translation="MKRIIIIFLSFYLLPLFGDSELKNGFGEEYYKLNVEQKRQIFFTK
MNAMFDKSFEEIAKERAFVEAFFYDVYKNGLRHSNQSNLEKLIIDLKKNYRVENLYDFT
EYKKRIQKIPKSMGMAQALVESATGTSRFAREANNLFGEWWTGEGKGLTPDLRHPDKKH
KIRIFDSLQDSVDSYVLNLRHFAYEEFRNKRAKFESEGKEITGLEAIKTLDSYSERK
GYVINIVTKIIQRYDLERYDVSNSF"
gene complement(75813..76850)
/locus_tag="DMACINML_01292"
CDS complement(75813..76850)
/locus_tag="DMACINML_01292"
/inference="ab initio prediction:Prodigal:2.6"
/inference="similar to AA sequence:RefSeq:A0H52520.1"
/note="ATPase, AAA family (DUF4143 domain)"
/codon_start=1
/transl_table=11
/product="hypothetical protein"
/protein_id="Prokka:DMACINML_01292"
/translation="MKVLNFFYENHPKFETS YERKVQIPFCNIIKGPKFSGKKT LIF
NYLSQFKPNEILFLNLYDTRFENQSL EHL SNFLEKNAQIKFLCIYNVDFALNLQDIKI
PIIISTDKKDLHIEGFQELDYFD FEEFVSISRKNLPINNLVGLFLQSGRSKLG EKN
ILLKQNFNTLELEILKYLALNLGQQ ISISKLFLELKKK LKTSKDSVYHTIKELENTYI
IHPISHDEKKLQKIYFRDFGLRNNLCIQKDFTHLFENLILNELFKFKQEFFYNKFFTF
YSKASKIAYISSPTLDIDLIKLRACKILSKSLELGIFHVVFITLSSSEDSFFEQGVKFE
VLPFDKFSLGF"
gene complement(77006..78163)
/locus_tag="DMACINML_01293"
CDS complement(77006..78163)
/locus_tag="DMACINML_01293"
/inference="ab initio prediction:Prodigal:2.6"
/inference="similar to AA sequence:RefSeq:A0H52524.1"
/codon_start=1
/transl_table=11
/product="WG beta repeat domain-containing protein"
/protein_id="Prokka:DMACINML_01293"
/translation="MNQISIKLDKNIDMDFLNFGALKEREIFYINLKLSDSQYEQFVF
KTILFNLENKFIKELDGSIGSSFCDGLLRNNTDKNSFIDKNANIVKINFPYDLNYRD
FHEGLIAVMVDKMGFANISGKLIIDAKFDWVDDFSQGLAIVKFNGKFGAIDKKGNFV
IQAKFEAIKFNKENVAAVCLNDKWGFVDKKGKIAIAMKYDEVKDFSQSLAGVRIDNWK
GFIDKKGNFVIQAKFEAIKFNKENVAAVCLNDKWGFVDKKGKIIKAKYDFIDDKDDE
MVMFGSKRGLCLLLSKENILGCFHEGLALARINKKYGFIDKNENWVIEAKYDEVEDFY
KGLAIAKLDKKSGLLDKNGRVIVDFLYEKILVVNKDIIILVKNNEILIQKI"
gene complement(78235..79716)
/locus_tag="DMACINML_01294"
CDS complement(78235..79716)
/locus_tag="DMACINML_01294"
/inference="ab initio prediction:Prodigal:2.6"
/codon_start=1
/transl_table=11

```

```

/product="hypothetical protein"
/protein_id="Prokka:DMACINML_01294"
/translation="MFFSKSKYTRGAQCAKSLWLQTYKKDVLSPDENTLARFSAGDK
VGELACELFPNGVKIEFEGSTFDEKCEQTKQLLENNQEVIYEATFCYDGILIMVDILQ
NTKEGFIINEVKSSTSLKDVIIDCSLQYYVLSNLGYKIKQVNL IHLNSEYYRDDFLD
INQLFKVNDITDEIIQKQEQVKENLKYFEDILNKKEEPNIDIGTHCFDPYECGDGYEYC
WIKQRNLCEKDSIFNISRLNSNKKFEFYKNIISFKDIKDLVFNKNQQIQIQASLNK
EIYINKEIKIEFLNTLTYPYIHLDFETFMQAVPEFKGVKPYMQIPFQYSLHIDYKDKL
EHKEFLSECGVDPYELAKNLINDIPKDACVLAYNASFERGVKLNALVFPFSEHLL
NIEKNIKDLMIPFQNKDYHYKMQGSYSIKKVLPALIPDMEQAYKDLNLIHNGSEAMQ
SFEAMQNMSEDDKAYRQALLEYCKLDTLAMVKILKHLEEIAS"
gene complement(79778..80419)
/locus_tag="DMACINML_01295"
CDS complement(79778..80419)
/locus_tag="DMACINML_01295"
/inference="ab initio prediction:Prodigal:2.6"
/codon_start=1
/transl_table=11
/product="hypothetical protein"
/protein_id="Prokka:DMACINML_01295"
/translation="MKKRILMLTMLVCMCFNLIGAKPISAIPQQDIAVEKTIDNNTTH
NISKNHTNAVIIIAIVYIVIAIVLVVYGIKGRIVVYRNLLDVSLCVLFAALPIVWI
IFLAMFFLQVERSITLITLGIMVFIWMSVLSYIAYITLKDNRYNPLLVLILPLKIIIL
GLWFGLSLFGAIKRGEKTVARERKEDKQNSLVHFAISSTLIYNLIKDKPFKNS"
sig_peptide complement(80339..80419)
/locus_tag="DMACINML_01295"
/inference="ab initio prediction:SignalP:4.1"
/note="predicted cleavage at residue 27"
gene 80564..82501
/locus_tag="DMACINML_01296"
/locus_tag="DMACINML_01296"
CDS 80564..82501
/locus_tag="DMACINML_01296"
/locus_tag="DMACINML_01296"
/inference="ab initio prediction:Prodigal:2.6"
/inference="similar to AA sequence:RefSeq:A0H52526.1"
/codon_start=1
/transl_table=11
/product="McrBC 5-methylcytosine restriction system,
component McrB"
/protein_id="Prokka:DMACINML_01296"
/translation="MSDLENSLKGFKDKDFGYYFGKDEKCYIYHTKFGRRERIEINES
NDIKSKFREIDNIYNENRDKFKGLKEAFKKYLDIYSDKSTIHIKFDKNGDFLKTKE
IVDNFSKTFGKEKIDEIPFDQGNFKKIDIFEKWWDKSINSARMKGNATNLLKDKDKLIK
NLEKIKKADESENLTKLFEKLKEVEGMKATARELAYFLQFNKDKDKFPLANDAMINI
AKYIFEILNENPTEIFDSSFDNCKKEEYFDDVFGKLEIANDNLSEEIKEKIEHLPKY
YILDQFLNLIDKIKKSDLALITKDKLAKNDGSKDIKQSVYYKLYQAAYDFANLCKGAD
IKSNDLEGFKELLKTHKNIIFHGIPGTGKTYTIVNNIKNIKNENQMLITQFHPSFSY
EDFIEGIKPTGIENGQLKLELKNIGIFREFCNKAKEEEKEFLGELEKGNFNEALSDYGY
FFIADEINRAELSRVFGELLYALEYRGEKGIKTQYASMRGDEDFYVPENVFFLGTMM
DLDKSIDSFDLALRRRFIWQEMTCDYDVIKNEIYAKNIEEYAQACKKLNKIKDIGEK
YQLGHSYFLKIEFKDDEIKNNDMKKLFNSRFEALLKEYLRSEYSEKDIQKHLDALKEL
FVIEKSKETKTNEKNNNNKND"
gene 82470..83819

```



/gene="mcrC2"  
 /locus\_tag="DMACINML\_01297"  
 82470..83819  
 /gene="mcrC2"  
 /locus\_tag="DMACINML\_01297"  
 /inference="ab initio prediction:Prodigal:2.6"  
 /inference="similar to AA sequence:RefSeq:A0H52527.1"  
 /codon\_start=1  
 /transl\_table=11  
 /product="McrBC 5-methylcytosine restriction system,  
 component McrC"  
 /protein\_id="Prokka:DMACINML\_01297"  
 /translation="MKKTIIIKTTDNSFIEIDQKSSKIQDFDLYFEDFIKNGNFFSFF  
 NDDEKILSKNAKNPIISVRTIDKDKKQITSGNYIGKIFYDNLEVEINSRFGKKFLERM  
 LNFANDVFVDDVSIYQDVKNESNISEFILFYIFVQKLEKSFLIGLPPKNYQSKKYNDLR  
 FKGNI DMVEFIKHNIPLKAKVATKTREQIEDVHIINVLYKALQVIEKKNSSFLKNVKH  
 IKTYLVQNKSEHCFIKESLNKAFSSKALRNQNYQNYKELLKYAKMII ESENFTSKNKN  
 DQKSYSFIINIAELFEIYISKLLRNNFEEYMLDSPKLEIYKNSFYKRYIIPDIVLSKD  
 DNYIVFDTKYKMTMEGKSQNGMGDLDRNDLFQIHTYMGYYQKIGKVLGGLLYPMQN  
 FNEEKCHSENSILSDEYQFIVDGIFLEDDQNSDKEITLEYIIQKEEQFIKRIKLLK"  
 gene complement(83824..84510)  
 /locus\_tag="DMACINML\_01298"  
 CDS complement(83824..84510)  
 /locus\_tag="DMACINML\_01298"  
 /inference="ab initio prediction:Prodigal:2.6"  
 /codon\_start=1  
 /transl\_table=11  
 /product="hypothetical protein"  
 /protein\_id="Prokka:DMACINML\_01298"  
 /translation="MNMALQGRGHKSFVFGFNDVKAKEDIQVLCENS DKGLKFQAQIQ  
 SIKNVQLLSQSYHLENGHFLDINVQSKLISFENFLSQTYGDFKYFCVVDFIKHNTKIH  
 YKSKEADTKNKLYHLASAYAFPKKGWIDEKVLNINDISPYQNILIEGLFCIKEQELLE  
 ILKQENLIKNNFYLKDYDFSKGLKLLDVS LDILFANISTKNFKPYKLEIDSITHEN  
 TERKISFISY"  
 gene 84749..86167  
 /locus\_tag="DMACINML\_01299"  
 CDS 84749..86167  
 /locus\_tag="DMACINML\_01299"  
 /inference="ab initio prediction:Prodigal:2.6"  
 /inference="similar to AA sequence:RefSeq:A0H52528.1"  
 /codon\_start=1  
 /transl\_table=11  
 /product="PD-(D/E)XK nuclease domain protein"  
 /protein\_id="Prokka:DMACINML\_01299"  
 /translation="MQDFIEELLKVSETFKNNAKKGMSDINIFEALGVEYKENYHSKF  
 IAYLINPHADHYQELFANEFLKKGESVQASNFKELTVQDIESVETEACVKDNRRIDI  
 LISLKD KRYIIIENKLYAKDQKNQLKDYINHLKNKIKSIDNFHENILTIY LHMDENTE  
 PSQISLGVKNGFKIQNNFIHDSSNKTMSYFFKMDYKWIKEWINLCISTCKDKFEKNEI  
 EKDFKEDMENVIFTLNQYKTLKWL TDFEAKDDVLKFLKENLEKTMTLYKYTKNKN  
 DFKDIEYDKYRKAKDIVKDKWDELCKELVSKFFHELKEKFEKAQSINKHGQWLGCELD  
 ENRFNYDWFDFYPEIYKDEDDVWPSIGVYFGSKYNHFG LTFKINYLEGDEKYKQCIN  
 CFQELTGKNTDNIRRHNEHYCDKFENFSNSKEEYAFIYWL INNHGDWTA EFSKILEE  
 FLNKETIKSALEEINEILKPSK"  
 gene complement(86173..87090)

CDS /locus\_tag="DMACINML\_01300"  
complement(86173..87090)  
/locus\_tag="DMACINML\_01300"  
/inference="ab initio prediction:Prodigal:2.6"  
/inference="similar to AA sequence:RefSeq:A0H52529.1"  
/codon\_start=1  
/transl\_table=11  
/product="transcriptional regulator (WYL domain)"  
/protein\_id="Prokka:DMACINML\_01300"  
/translation="MKDFKKYIANSKLRLEILYDRLVKSENGITIKELAQELNVSTK  
TIKRDMQEVLEPMGLVKNKWKYIDTSKDTQKQDDKIILEVLDTMAKSAGSSFYAKAH  
PLLSRFSQNISNPIHTSLDAEKLEEKDLNHFQILEQAISTKTQIVFKYENKLFQVKPL  
KLAFFSGFWYLLAFDMKKRDIFKKFYLNKIQNIILTQESFQTDEILEARLRKVNSIWF  
SLDKPFVVRLLVEEVRKYFERKPLNSQIITGKDKDGSIEIELEINHEMEILPLVYYY  
IPYIKVLEPDFIADKVKEVKDYLEQISK"

gene complement(87335..87784)

CDS complement(87335..87784)  
/locus\_tag="DMACINML\_01301"  
/inference="ab initio prediction:Prodigal:2.6"  
/inference="similar to AA sequence:RefSeq:CAL35634.1"  
/codon\_start=1  
/transl\_table=11  
/product="putative bacterioferritin"  
/protein\_id="Prokka:DMACINML\_01301"  
/translation="MSVTKQLLQMADAHHLVVKFHNYHWNVKGKLFYSIHEHTEKAY  
EEMAELFDDCAERALQLGEKAITCQKTLMENAKSPKVEKDCFTPVEVMELIKKDYEYL  
LAEFKKLNEEAEKASDTTAAFAQENIAKYEKSLWMLSSALQNTCQM"

gene complement(87910..89130)  
/gene="pgi"

CDS complement(87910..89130)  
/gene="pgi"  
/locus\_tag="DMACINML\_01302"  
/EC\_number="5.3.1.9"  
/inference="ab initio prediction:Prodigal:2.6"  
/inference="similar to AA sequence:RefSeq:A0H52531.1"  
/codon\_start=1  
/transl\_table=11  
/product="phosphoglucose isomerase"  
/protein\_id="Prokka:DMACINML\_01302"  
/translation="MLNNTLFFKKSEIHAISSYANRINDEVESGDVGYHLLIDTSLTL  
IDESLNFIQDKEHIKNIVLVGMGGSSCGVKALRDMLFDEKSNQRELFILDNTSSHSFN  
KTLEKIKLEESLFLIISKTGSTIEVSLFKLLIEHFKLDMQELKKYFVFITDKD SKLH  
KEGENLGIKCFIPANVGGRFSILSAVGIVPLCFCGYNAKALLEGAKACFEDFFIHKK  
DEILQKAYHYCTHKSANINVLFSYSDAFKGFNEWYIQLIAESLGGKQGYKRIGLTPIA  
LIGARDQHSFLQLIMDGPKNKTITFLKIKDGQKAPVIPDIHFKFLDDL SNKVNLDLL  
NAQC DATMHALIAENLSVDIIELEKLD AWHAGYLMYYYELFTSACGVMLGINTYDQPG  
VEVGKLILKNILKS"

gene complement(89124..89948)  
/gene="galU"

CDS complement(89124..89948)  
/gene="galU"

```

/locus_tag="DMACINML_01303"
/EC_number="2.7.7.9"
/inference="ab initio prediction:Prodigal:2.6"
/inference="similar to AA sequence:RefSeq:CAL35636.1"
/codon_start=1
/transl_table=11
/product="UTP--glucose-1-phosphate uridylyltransferase"
/protein_id="Prokka:DMACINML_01303"
/translation="MLQTCIFPAAGYGTRFLPATKALPKEMPLILTKPLIHYGVDEAL
EAGMDNMGFVTGRGKRALEDYFDISYELEHQISGTNKEYLLKDIRSLIHRCTFTFTRQ
NEMRGLGDAVLKKGKPLAGDEAFGVILADDLGINEEGVNVMAQMVKIYKYRCTIIAVM
EVPKEQVSSYGVIAGNFVEEDLIMVNSMIEKPSPEAPSNLAIIGRYILTPDIFGILE
NTKAGKNGEIQLTDAALLTQATNGMVLAYKFKGKRFDCGSVEGFVEATNYFYEKSKC"
gene complement(90054..92027)
/gene="acs_2"
CDS /locus_tag="DMACINML_01304"
complement(90054..92027)
/gene="acs_2"
/locus_tag="DMACINML_01304"
/EC_number="6.2.1.1"
/inference="ab initio prediction:Prodigal:2.6"
/inference="similar to AA sequence:RefSeq:CAL35637.1"
/codon_start=1
/transl_table=11
/product="acetyl-coenzyme A synthetase"
/protein_id="Prokka:DMACINML_01304"
/translation="MRYQNTQGLFKPNKQLSRNARIKNLCEYYDLCEVREDFEGFWK
RQALEKIDWFSPFSRVLNDDKAPFYKWFEGGTLNVSYQCLDRHMKTRRNKAAIVFEGE
MGDYEVYTYRLLHEVCKAANLLKRFVKKGDRVVIYMPMIPETAIIMLACARIGAIH
SVVFGGFSPEALRDRIIDAGAKLVVTADGAFRRGKPYMLKPAVDKALSEGCEVKEVL
IVIRNNEPIEYIKGRDYVYNELVKNESYKCEPEIMDSEDLFLLYTSGSTGKPKGVMH
ASAGYILWAQMTMEWVFDIKDYDNYWCSADVWITGHTYVVYVYGLACGATTIMHEGTP
TYPNSGRWWRMIEEYQVSKFYTSPTAIRMLHADAPDEPKKYDLNTLEVLGTVGEPINP
SAWQWFYENIGNSKCSIVDTWWQTETGGHMITPLPGATPLKPGCATLPLPGIFAEVID
EEGNVKDVAEDGLLCITKPWPSMIRGIWGDENRYIESYFSQAKKEGKPVYFSGDGAFY
DDNGYITITGRDDVVNVAGHRIGTAEIESAIAKHPSVAESAVSVLDAIKGESLFAF
VVLNPTSSCDLGGAIETLKEINDILRAEIGPIAKIEKILYTTGLPKTRSGKIMRRILR
TIARGEELKQDISTLEDSGVVQSIIDAAKTGIQ"
gene complement(92168..93163)
CDS /locus_tag="DMACINML_01305"
complement(92168..93163)
/locus_tag="DMACINML_01305"
/inference="ab initio prediction:Prodigal:2.6"
/inference="similar to AA sequence:RefSeq:CAL35638.1"
/codon_start=1
/transl_table=11
/product="putative anion-uptake ABC-transport system
ATP-binding protein"
/protein_id="Prokka:DMACINML_01305"
/translation="MIELCNFKFNYGQKNILNIKHLCLDTDKISILMGSNGSGKSTLL
RVLKFLGEGFDNITYFGNKHLNSDEKRQIYLLFPEPVFLNRSVEKNFYFLKTYKLDL
KEIKKRLEEVNLNLEIDRSLKYPSELSSGQGQKIAFALALSARAKYYLLDEPSAFL
DKDTMILFKKAILYMQKTYKSGFLIASHDKNFLDSLAKKYYLHAGEILEFENTNIFE
LENKGVNFSNFVDFSMCKNYIYKDEISNKIAIDPYKISFLYPDDFSKQTFDFILQKCI

```

gene IIALRTRKEFVFIRVECGSKILEFALESKRFKQEKLSLYQELCLAFNEEAICFLN"  
 complement(93164..93850)  
 /locus\_tag="DMACINML\_01306"  
 CDS complement(93164..93850)  
 /locus\_tag="DMACINML\_01306"  
 /inference="ab initio prediction:Prodigal:2.6"  
 /inference="similar to AA sequence:RefSeq:CAL35639.1"  
 /codon\_start=1  
 /transl\_table=11  
 /product="putative anion-uptake ABC-transport system  
 permease protein"  
 /protein\_id="Prokka:DMACINML\_01306"  
 /translation="MDYILEGFAQALFLLFNADESVISAIKTTLFSSSISIVLSLIVG  
 FPLGFALGFFFEKMKRFIKLIVDTSLSFPTVAVGLILYALISSRGPLGDLGLLFTVKA  
 LILGQFVLALPIVIALFSNLIENMNKHFLLIKSLHLSPLKLVMTIIYELRFALVSVV  
 ALAYGRIVAIEVGVAMIVGGNIKYDTRTITTAISLETNKGEFASGIALALVLIFIAFIL  
 NFIIHKLKRY"  
 gene 93934..94743  
 /locus\_tag="DMACINML\_01307"  
 CDS 93934..94743  
 /locus\_tag="DMACINML\_01307"  
 /inference="ab initio prediction:Prodigal:2.6"  
 /inference="similar to AA sequence:RefSeq:CAL35640.1"  
 /codon\_start=1  
 /transl\_table=11  
 /product="putative periplasmic protein"  
 /protein\_id="Prokka:DMACINML\_01307"  
 /translation="MKKIISLALALALSASAAELRMATTTSTDNTGLLDALKPLYEKE  
 SGNTLKWVAVGTGAALKMGEDCNADVLFVHSPKAEKDFVSKGFGVDRTPVMYNDFIII  
 ADKSLAPKFKDKNLKESLELIKNEKLTFSIRGDKSGTDNKEKALWKDLGGVPEKESWY  
 QQSGQGMLASIKIAEKKGVILTDRGTYIKYEANEKGNPNLVIVNEGDDNLKNFYSSII  
 ATNPKHCKNVNYTEASKFIKWVTSKTLNFISEFKLLNKPLFIVDAKTRKD"  
 sig\_peptide 93934..93987  
 /locus\_tag="DMACINML\_01307"  
 /inference="ab initio prediction:SignalP:4.1"  
 /note="predicted cleavage at residue 18"  
 gene complement(94740..95156)  
 /locus\_tag="DMACINML\_01308"  
 CDS complement(94740..95156)  
 /locus\_tag="DMACINML\_01308"  
 /inference="ab initio prediction:Prodigal:2.6"  
 /codon\_start=1  
 /transl\_table=11  
 /product="hypothetical protein"  
 /protein\_id="Prokka:DMACINML\_01308"  
 /translation="MKVVDRINEILKEKNISKKELANRLINLGMRRANKTGEIPTLSSI  
 YAYLNGNIDIKADMIPFIADALGVFEQELFSNKKEENLKIVHKLYRNKASHQNYSNLL  
 ELLEFLSPKNLEILEEILLQNKAKSLEISSLLRNNF"  
 gene 95278..97500  
 /locus\_tag="DMACINML\_01309"  
 CDS 95278..97500  
 /locus\_tag="DMACINML\_01309"  
 /inference="ab initio prediction:Prodigal:2.6"  
 /inference="similar to AA sequence:RefSeq:EAQ72655.2"

```

/codon_start=1
/transl_table=11
/product="putative glycosyl transferase"
/protein_id="Prokka:DMACINML_01309"
/translation="MAKLSIIIPFGTSKERPYIKERVANKANEYKSDDLVEYIFVEGF
SSLEHLELKNLIENKGHRYFKDATQQFNKAFSLGQCRNLGIVNAKSDVVMVSLDVCVI
SEKNLENIILELISIKEIDKNPNAFLVLPICIFLNEFGTEFLQRYKLSLWDNIIIHDMNF
DRKFIKFLTPASSTIIMNRFKFLLEGGNDQEFVGHGYEDFDLMMRILKNCTDFEAIPT
NLEFDYRNWSFNDYKGFALFSVVGNEACVHGIYLYHLWHAEPNQNGYLDNRELNHQK
FYQKLKNYKIDFDGPDTLIENEAKNRNALVFFQQNSNLYSSLRAIMPYFEKLISAKEY
YFFDEKDKFNSKNFLKFYHQNNITHIIFPNSHANEKRLEIFQFIREKKLPIVYDRGA
LPDSWFFDDKGFNYDSTSDEKNWNKTLNEEQKIKLTYIEEVKGEKFLKQGLSKG
SDNLKRKGLRHKKIFFVPLQVKDSDVLKNFTYEPFSYENFLNILNELAKKLFIEINIV
FVVKKHPLSLDLDKTTYDNLIFVPDDTNLNDLLGLCNAVLTLNQSGVGVYAILAKKPCI
VCANAFYRFDNLNLQANNEKELFEHILNISQGNFNFNEEKALRFIHYLRYEFYSFGKS
YYKKSEENGRIYTKVYKIEFYSLILFGKLLDFNSIKKQNYKLNPSPIYKPYIYEIKEK
KLRDLKGNGLIATQAKISHFKFYRLFRKFITSPKDFIMDSKKPFMKPIKLILRKAL
"
gene 97497..98663
      /locus_tag="DMACINML_01310"
CDS 97497..98663
     /locus_tag="DMACINML_01310"
     /inference="ab initio prediction:Prodigal:2.6"
     /codon_start=1
     /transl_table=11
     /product="hypothetical protein"
     /protein_id="Prokka:DMACINML_01310"
     /translation="MKYSLGILLAATKDSAFITIGTLLINIKDKMDISQTIIFYIINDGF
SQNDKSIMQELVPNIKFINFITIDDFETNIRKFNADFKLDKQNPILNRYTHMTYARFEA
LKFLEECENIIYLDLDFMLLLKGIDELKEIKNKGYEIACFRGSATMSMGGGQLTPIQFT
HTNNYSAGIIVFNDNLKSSQKFYDFIYQFIAKNEDYFLEVKLGQDFLFSLYLLEKGLK
IYELNDNYYGNISWVKS KDASILHAWGQNNRFWNNKLCALAWPSWNVVYQKWL SLGGS
AYEKGFSVFLVLPQSGGEVFQYFERIVLAKRISQIKLEKQELIIDIDFSKKIKFHAF
IKNLV FYVYSKSI FTFILECE FQ GKITQSITIKRPELENALKEFITSNLNKYQI"
gene complement(98941..99609)
      /locus_tag="DMACINML_01311"
CDS complement(98941..99609)
     /locus_tag="DMACINML_01311"
     /inference="ab initio prediction:Prodigal:2.6"
     /inference="similar to AA sequence:RefSeq:AHY40701.1"
     /codon_start=1
     /transl_table=11
     /product="2-amino-4-hydroxy-6-
hydroxymethyl dihydropteridine pyrophosphokinase"
     /protein_id="Prokka:DMACINML_01311"
     /translation="MENHYFFRSEKLANALLLTYFYTFMCIIFLALKNFYYELARV
TKQKYFINAFWCLFIGILFTPIMIGIMIGIVLLIIGMIFYVVAWVELQELSSEIPQTL
KSYQTYKGNLNLVKT L FISAGILILVLYLGSFLLEFYFKDESFFDIYSTAQILVTVIS
LILGFIATILFCKNTKKWILTLYFVLGFFSIYAVFIFVLIMDLFSLHFFVFIGDDFSI
LRVL"
gene 99826..100596
      /locus_tag="DMACINML_01312"
CDS 99826..100596
     /locus_tag="DMACINML_01312"

```

```

/inference="ab initio prediction:Prodigal:2.6"
/inference="similar to AA sequence:RefSeq:CAL35641.1"
/note="conserved hypothetical protein Cj1541"
/codon_start=1
/transl_table=11
/product="hypothetical protein"
/protein_id="Prokka:DMACINML_01312"
/translation="MFKVDLNSDLGESFGAYKMGMDDEEILKFVSSANVACGFHAGDPC
VMDKTLNLAKQNNVCIGAHPSYPDLLGFGRNMQVSFEEAKNYALYQLGALFAFAKAK
GMKIQHFKAHGALYNMAAIDENLALALCEAVASFDESIIIFLGLSNSAMNEAAKKKGLK
YANEVFADRAYNDDGTLVSRKLEGAVITDEDLAIKRVIKMIKESKVTSSINGKEVDLKA
DSICVHGDGIKALEFVKIKENLTKEQIQIKALNDFIN"
gene 100618..101787
      /gene="mntH"
      /locus_tag="DMACINML_01313"
CDS  100618..101787
      /gene="mntH"
      /locus_tag="DMACINML_01313"
      /inference="ab initio prediction:Prodigal:2.6"
      /inference="protein motif:HAMAP:MF_00221"
      /codon_start=1
      /transl_table=11
      /product="Divalent metal cation transporter MntH"
      /protein_id="Prokka:DMACINML_01313"
      /translation="MINKTALLGAAFLMATSAIGPGFLTQTATFTGSLLASFGFVILV
SIILDIGAQLNIWRIIGISGKRGTEVANMVLPNLGYFVAFLIALGGFFFNIGNIAGAG
LGLNIVLGISVENAAIISAIIAIGIFIFKKAGELMDKFIVLAGFVMIVLTAYVAFASK
PPIGEALFRTFIPTQIDVISIVTLVGGTVGGYIVFSGAHLIDAKLYGKENLNYINKA
AVSGIIITGIMRVILFLAVLGVVSSGFILDKENPAGSVFHHALGDLGLKIFGIVLFLA
AISSVIGAAYTSVSFIRSFHPWIEKYNRVWIFFIIVSTLVFYILGKSPASILIIVGT
INGWILPITLFIIMIAAHKKSIVGDYKHPKWMSAFGLLIVALMSYLSILSMIKLI"
gene 101789..102529
      /locus_tag="DMACINML_01314"
CDS  101789..102529
      /locus_tag="DMACINML_01314"
      /inference="ab initio prediction:Prodigal:2.6"
      /inference="similar to AA sequence:RefSeq:CAL35642.1"
      /codon_start=1
      /transl_table=11
      /product="putative allophanate hydrolase subunit 1"
      /protein_id="Prokka:DMACINML_01314"
      /translation="MFSIHFGSKAVLLRFKQEISPQINALVLSTEARIQKGINENEI
YGIDELVSAYSSLLIYFNPCVLSLNSLLDFLEKIKKDIKITDKSNLCIEVPLCYDEE
FGLDLEFVCKYHNLSKEELINLHTKPYLVLVFMGLGMAGFPYLGGLDERLFTPRLASPR
TKIEAGSVGIADKQTVYPISSPGGWQIIARTPLEFFNKEDEKNPTLLKAGMFLKFKA
ISKDEFYDIKEQVLKKVYQKEIYEQKSH"
gene 102510..103475
      /locus_tag="DMACINML_01315"
CDS  102510..103475
      /locus_tag="DMACINML_01315"
      /inference="ab initio prediction:Prodigal:2.6"
      /inference="similar to AA sequence:RefSeq:CAL35643.1"
      /codon_start=1
      /transl_table=11

```

```

/product="putative allophanate hydrolase subunit 2"
/protein_id="Prokka:DMACINML_01315"
/translation="MSIKVIEASINSTIQDLGRKKNYAKLGIARSGVMDELSLRIANIL
LGNKQDEAGLELCLKGGKYEFLDESYFVLSGAEFEAKLNKKIQTCKVYQAKKDDVLE
LGLAKIGFRGYLCVAGGFKIKSFLNSKSSDVKMDVGI FNGRALQKDDVLELNNSFIFP
NLSKRECENPVFQFAKEPTIRVVLGTNDDAFTQNGLNTFLNTSYKIGLKSDRMAIYAE
AQAMIEHKNSADIISDPAVFGSIQVPKNGLPIILMAGRQSTGGYTKIASVIENDLPLL
AQAKLGTNFKFENISMQNALELYKQREERFKTLDKKINLDFENLI"
gene 103484..104248
/locus_tag="DMACINML_01316"
CDS 103484..104248
/locus_tag="DMACINML_01316"
/EC_number="4.2.1.-"
/inference="ab initio prediction:Prodigal:2.6"
/inference="similar to AA sequence:UniProtKB:Q87UC6"
/codon_start=1
/transl_table=11
/product="Putative hydro-lyase"
/protein_id="Prokka:DMACINML_01316"
/translation="MNPQQLREKIAKGEIKEQTSGMALGYAQANLVILPKEYAKDFET
FCILNPKPCPLLEIVHGKFTQKIAKNANIYTDIPKYFIYENGVKTKAYDISEYYND
LIGFLLGCSFSFEEALLEKGLEIRHISNKCNPVPMYKTNIACKSVGIFSGEMVVSMPF
TPDNAKKASEITANFPLVHGAPVQIGNAKEIGINNVLKADFDDPIIREGEIPVFWAC
GVTPQNVIMKAKLPFVITHAPGHMFISDILNSSLKS"
gene complement(104245..105144)
/locus_tag="DMACINML_01317"
CDS complement(104245..105144)
/locus_tag="DMACINML_01317"
/inference="ab initio prediction:Prodigal:2.6"
/inference="similar to AA sequence:RefSeq:CAL35644.1"
/codon_start=1
/transl_table=11
/product="putative integral membrane protein"
/protein_id="Prokka:DMACINML_01317"
/translation="MDRSKYLFILLVIAMFLWGSSWPTSKILANYTDTSIITFWRFFF
VVLGSFFVLSFLKIPLRLEKTALKWVLIAGVLNGLYAFVFFIAIKHGLAGKGGVLVTT
MIPIFSYLIFMIAIFFQKNKKSTHKITKSEILGLFLGLISGLCLLNLGSMEELLGKFN
ALFLSCAFIWALMAVFTHKAKGTHPLAINFYINLMSLLMFSWVFLDLKSYEIFQDFK
FWVNLFWVAFVSTVVGTSIYYYGIHILGSVKANSFVLITPASALICSFILDEVPTIL
TLIGCVLAIFAIYFINIYGKKKS"
gene complement(105278..105862)
/locus_tag="DMACINML_01318"
CDS complement(105278..105862)
/locus_tag="DMACINML_01318"
/inference="ab initio prediction:Prodigal:2.6"
/inference="similar to AA sequence:RefSeq:ASN48943.1"
/codon_start=1
/transl_table=11
/product="flavodoxin family protein"
/protein_id="Prokka:DMACINML_01318"
/translation="MKNILLLNAGKSFHSGGKLNLDLHEVAKESLLNLGLKVDETYI
DKGYDIENEVAKILNADAIYQMPGWWMGEPWIVKKYIDEVFTAGHGKIFYANDGRSRE
DASKKYGSGGLVNNKKYMFSLTWNAPLEAFNDKDQFFEGVGVGGVYLHLHKANQFLGM
KPLATFICNDVMKNPQVEKYIKDYKAHLQKVFGN"

```

gene complement(105873..106307)  
/locus\_tag="DMACINML\_01319"

CDS complement(105873..106307)  
/locus\_tag="DMACINML\_01319"  
/EC\_number="2.3.1.82"  
/inference="ab initio prediction:Prodigal:2.6"  
/inference="similar to AA sequence:UniProtKB:Q9R381"  
/codon\_start=1  
/transl\_table=11  
/product="Aminoglycoside N(6')-acetyltransferase type 1"  
/protein\_id="Prokka:DMACINML\_01319"  
/translation="MVKKANKNDNETIANLALLLWPNHNLKDLEQEFLEILDSKKVAI  
FLKYIGTEAVGFVYVSLRNDYVEGSSSSPVGYLEGIFIKKEEFRKRGFAKELLEFCCKW  
AKKQGAKEFASDCELENQKSLSFHKALGFSEANRIVCFIKKL"

gene complement(106315..107505)  
/locus\_tag="DMACINML\_01320"

CDS complement(106315..107505)  
/locus\_tag="DMACINML\_01320"  
/inference="ab initio prediction:Prodigal:2.6"  
/inference="similar to AA sequence:RefSeq:ABV53053.1"  
/codon\_start=1  
/transl\_table=11  
/product="transporter, putative"  
/protein\_id="Prokka:DMACINML\_01320"  
/translation="MQQSSITINNTHQIKILITLCLGVFGLISMELGVMGIIPLISEK  
FGVSVSDAGWSVSIFALIVMCCAPIAPMLCANFNPKKLMFLCLAI FSLSSLASMFVND  
FWLHLILRAIPAFFHPIYLALAFSTAANLADDSKVPKPHIVAKIFMAISAGLVLVGPLS  
SYFGGNFSFEMAMAFYVINSLAFFITLFFMPDFKKT SRIKVGKQLLSLRYALLWISM  
LAVFCISTGYLGFYSYSEFLFSVSKMSFTNISLALFIYGFASIIIGNNIAGKTLINHS  
NQTLVFTSMAMILIYALIFVNAAQFAIMLTLSLILGILNGILNNAMHYIITFPFPRAK  
DFTNGLFISVSNISISVGATLCGLVISIKETKYIAISSIIMVGLGLILVLRMRLEDK  
RLKI"

gene 107636..108088  
/locus\_tag="DMACINML\_01321"

CDS 107636..108088  
/locus\_tag="DMACINML\_01321"  
/inference="ab initio prediction:Prodigal:2.6"  
/inference="similar to AA sequence:RefSeq:AFU43554.1"  
/codon\_start=1  
/transl\_table=11  
/product="Blc protein-like protein"  
/protein\_id="Prokka:DMACINML\_01321"  
/translation="MIELIGDVNLEKYMGTWLEMARKPAFFQKSCVQSKAEYQLEYEG  
STPVVKIKNICVKKDGEVSQVQGKAKVKS PRALSVKFSIFMNLFNKTNYEILFVDTDY  
EVAVVGSPDKEYLWILSRKIIDKKDIDKLLDI AKQKGFDISDIVFDKY"

gene complement(108085..108663)  
/locus\_tag="DMACINML\_01322"

CDS complement(108085..108663)  
/locus\_tag="DMACINML\_01322"  
/inference="ab initio prediction:Prodigal:2.6"  
/inference="similar to AA sequence:RefSeq:AJP35953.1"  
/codon\_start=1  
/transl\_table=11  
/product="Chloramphenicol acetyltransferase"



```

/protein_id="Prokka:DMACINML_01322"
/translation="MYKKLSLSNYEKERLKHNTALSRFELSHSFKINKMKNSHFIY
SLSKIVNDTQELKRSVIENEAIQFHKINPAYVLLKNNEICNTTFEDYDFNIFLSNYE
KDYELFLKKDLFCIKQAPENSFYISSFKSYFNSFSLHLLKNGYEFYAPIFTTYKKVDE
LIIYANFHHAFFDLSKAKIFFENLEFELKKL"
gene complement(108672..109751)
/locus_tag="DMACINML_01323"
CDS complement(108672..109751)
/locus_tag="DMACINML_01323"
/inference="ab initio prediction:Prodigal:2.6"
/inference="similar to AA sequence:RefSeq:ADT66781.1"
/codon_start=1
/transl_table=11
/product="oxidoreductase, zinc-binding dehydrogenase
family"
/protein_id="Prokka:DMACINML_01323"
/translation="MDSKIFLENGRIQSKGYAMLSKDAKFTPFEFTRHAVGNDILIK
ILYAGICHSDIHTARSEWGEAVYPCVPGHEIAGEVIAVGKNVSKFKVGDYAGVGMVN
SCGECEACKKSQEQFCEKQTIYTYNSCDIFHDNENTYGGYSNNIVVSEKFAVCVCPKD
APMEKVAPLLCAGITTYSPLKFSNIKEGSSVAVAGFGGLGMMAVKYAVKMGAKVSVFA
RNENKKADALAMGVSSFYTSTDKNAVKERFDLIISTIPTPYDPSAYMDLLKFGGEMAI
VGLPPHEVAPSSIVITFVHKAGKKVYVYGLIGGIAETQEMLDLFLKHKIYPETELITSK
DIDKAYENLTSGKAKFRYVIDMTKE"
gene complement(109927..110166)
/gene="hsdR"
/locus_tag="DMACINML_01324"
CDS complement(109927..110166)
/gene="hsdR"
/locus_tag="DMACINML_01324"
/EC_number="3.1.21.3"
/inference="ab initio prediction:Prodigal:2.6"
/inference="similar to AA sequence:RefSeq:CAL35649.1"
/codon_start=1
/transl_table=11
/product="putative type I restriction enzyme R protein"
/protein_id="Prokka:DMACINML_01324"
/translation="MQEKILGNEKLLALVSEILQIIKNNASIDWMIKENVRARLRVAV
KRVLNKYGYPPDMQQLAIDGVLAQAEILAKELVGE"
gene 111006..111776
/locus_tag="DMACINML_01325"
CDS 111006..111776
/locus_tag="DMACINML_01325"
/inference="ab initio prediction:Prodigal:2.6"
/codon_start=1
/transl_table=11
/product="hypothetical protein"
/protein_id="Prokka:DMACINML_01325"
/translation="MVKFDSGYLKKSGEIIISLEEIIKLNKQGLNKHDFCPDCKIAR
LKLVHKKNIFLQTSNKQIHKQYCSKITDDTKSTSIKEPNDIDSERVKYIKNKLKLLLE
NFRLNQVNIDSEGNEKLNKDNDYFQNSKEVKYRNNTTPDES RHCFTNYKKKIIPKQS
HDAFYFGICKIEKIVKKQDDKIDKYFLKLNKHYENMLLASLSITPIVGEYLGKQNFQNH
INNNELYKVSFFTNGTMADRGENIVILRSDFLNFEEYK"
gene 111788..112417
/gene="rloF"

```

CDS /locus\_tag="DMACINML\_01326"  
111788..112417  
/gene="rloF"  
/locus\_tag="DMACINML\_01326"  
/inference="ab initio prediction:Prodigal:2.6"  
/inference="similar to AA sequence:RefSeq:ANS24593.1"  
/codon\_start=1  
/transl\_table=11  
/product="RloF"  
/protein\_id="Prokka:DMACINML\_01326"  
/translation="MDARRLWFIPDVIGSNRVQFQIPVYQRNYDWSVENCKKLMSDIK  
DIVETGEKHFLGTIVYMSDKKTSASFQKYIIIDGQQLTTIMLILKALHDIALTINDK  
SAEQIDNEFLHNKYCDEEFKIKLKPIKTDNEQFTMLLKNDEENVNKDSNIYRNYEFCKK  
YLEKLINENSLTPNQILEALFSLIVEIVLEQ GKDDPQIIFESINSIRG"

gene 112648..113733

CDS 112648..113733  
/locus\_tag="DMACINML\_01327"  
/inference="ab initio prediction:Prodigal:2.6"  
/codon\_start=1  
/transl\_table=11  
/product="hypothetical protein"  
/protein\_id="Prokka:DMACINML\_01327"  
/translation="MFPFLHIFNDFEKRIIEESTLIKVLEFLLSYLLHRLVCEIDSK  
ALRGLFATLYNRVFKVQKNKDKYCNAIIFQTIHSDKIPTFKEFQTSLSKINIYRK  
TKLCKFILMDIENSSSKEKMLDADNISIEHIMPQALKEWENELGNIDKYEEYLHKL  
NLTVTGYNSTLSNKSFQEKIKTLKLSKAIFLNKDVISEKHWTFDKIETRGRKLAEFFA  
KKYKVDTVKDEDIAFNLDVFTLKYDNIKKKTLDCFRFQNTTHYADNFTTLFLDLLKI  
LDEIDPNKLTNLAENQHSYVPDTTKNKHVYISNQEDENMRNPIKFKENVWVEKSIPLD  
RICKITESVLNEFGFNIEDLQIGLVKK"

gene complement(114546..116003)

CDS complement(114546..116003)  
/locus\_tag="DMACINML\_01328"  
/inference="ab initio prediction:Prodigal:2.6"  
/codon\_start=1  
/transl\_table=11  
/product="hypothetical protein"  
/protein\_id="Prokka:DMACINML\_01328"  
/translation="MNANLIKSV EYIDTKSELEKELLNALEKFKEIQSFYFKQGIRPA  
FIIQISNEINAVSEMEI IKKVLNNHSLN WYFVEKENMYETNSKLNNIKNKSLWQNYI  
KQNDFPIDV IIFKMVITEGFDIPRACMLFQVRDSKSKQLDEQVVGRRRNPCLMNYEM  
LDKKTQE IFSKAYVYGLKPQEEQFFKIKTHLKGGEHLGLFENEI KEFKPFKITTLQE  
IPLSVIDISDCLKEEKLDEFKSIFDIYKDLQNVNDTVKQKQEECVKSYSDWFLFNAN  
IDEIKNKVLEVI EDYDKYGEI KEVELREDIYSFFDKSKNNLRVKSMMWTCEEDNFSFD  
SDAELEWLEILEDVAYSCKKISIDDKEIYLF GKNYIEKSNIKYEYD LKKHTSYPDF  
IFKDKDKIHLFEVKS LNLHNGNDIDFKEYREKIEK LKKAYLFASKKTGYIFYIPIKI  
GNDWRVWRCENGI EDKGDKIMNKDMFKKY LKDLQK"

gene complement(116138..116578)

CDS complement(116138..116578)  
/locus\_tag="DMACINML\_01329"  
/inference="ab initio prediction:Prodigal:2.6"  
/codon\_start=1

```

/transl_table=11
/product="hypothetical protein"
/protein_id="Prokka:DMACINML_01329"
/translation="MKQEIIELQNKAINKLYHLSLSGKDKITLKAPTGSBKTYMMSSF
MNMKLDNNKNIVFIVSTLSKGKLANQSYESFENLSLVKFNKLPFLISSGNENNNKQ
YSLHIDNSCNVFLPTAQYTKSRINTEKTLAFLQDCKNSAKK"
gene complement(116582..117760)
/locus_tag="DMACINML_01330"
CDS complement(116582..117760)
/locus_tag="DMACINML_01330"
/inference="ab initio prediction:Prodigal:2.6"
/inference="similar to AA sequence:RefSeq:AGQ95763.1"
/codon_start=1
/transl_table=11
/product="DNA methyltransferase"
/protein_id="Prokka:DMACINML_01330"
/translation="MLYPRLVLAQQLLTDDGVIFCSIDDKNQAYVKCLFDDVFGEGNF
ICSSPRITKGGKSSKTISKNHDIYILYVKNINLLDNFVLDERENSKFTLEVRGKYAL
TQTLDYSSLKYSKNMDYPITINGKTFYPGGSYEKYLERQNGHLGTTDWWWRWNKKA
VEWGIENDFIVVKNDRITYTKSYEKCRKKNQDQIEFIDGKSFTTSLFIENENSNDNGK
E LDLILANDNNKAPFSNPKPSSFLINLIKMVSPDENGSDIVLDF FAGSGTTGHAVMQ
LNKEDGGKRQFILVTNNEITDINPNGIAYDVTSKRLKRIMTGSCYDGTNDFKWLKDNK
PYQNNLEVYELDSIASNNQEIFSVIDEKLYGEDFKQDIQAKIKWICENFEITCKDLED
"
gene complement(117924..118208)
/locus_tag="DMACINML_01331"
CDS complement(117924..118208)
/locus_tag="DMACINML_01331"
/inference="ab initio prediction:Prodigal:2.6"
/codon_start=1
/transl_table=11
/product="hypothetical protein"
/protein_id="Prokka:DMACINML_01331"
/translation="MADNLEDLRQDAISKIQERMQDGI ESENAEFLTKLLENANAKA
DILKILALGMTYKKTGFHFEPKLEKNTNTINYFKKNESLSFTNGGGGFTA"
gene 118321..119589
/locus_tag="DMACINML_01332"
CDS 118321..119589
/locus_tag="DMACINML_01332"
/inference="ab initio prediction:Prodigal:2.6"
/codon_start=1
/transl_table=11
/product="hypothetical protein"
/protein_id="Prokka:DMACINML_01332"
/translation="MIKIAIAYDFDGT LAKGNIQENSFIPKVG TNKDDFWRKT KETAQ
ENDMDEILSYMYQIVKCADNADIKITKDALKEHGKSVEYFNGVESFFERINKYAKNKN
IKIEHFIISSGTKEMLEGTTIAKYFKNIYASSFMYD TYGKPIWPALAINYTTKTQFLF
RINKGIYNAWDNTQINKYIPEDERNIDFKHMVYLG DGETDIPAMKLLKDKGGLSIAVY
DPEHPKEKIDNVEILVDNERAHFVCEANYEENSSIDL IIKNYIDKIALETQFGKCRAK
QPSNDKNEVFKDDDDAKITPEDKINNALKLLEVDKIS QNQEDNAIYLKASAYDDYGYQ
TSFYIWSGKKYIGFAKIAEKNQVENKHTSEN LKKEFNKLDEKFISKITFKNNNLNKEQ
QKALKFLLNDISNTKEHDNLEVQKSLKRN"
gene complement(119824..120474)
/locus_tag="DMACINML_01333"

```

CDS complement(119824..120474)  
/locus\_tag="DMACINML\_01333"  
/inference="ab initio prediction:Prodigal:2.6"  
/codon\_start=1  
/transl\_table=11  
/product="hypothetical protein"  
/protein\_id="Prokka:DMACINML\_01333"  
/translation="MSEDEREKIKTILKKYLIPRSSAQVFYVQDFSLKEYEQSMQKLL  
DEHLKVGQIYTLNEPLDILGDDFSKVASDFNDTVKAYGILNALEKEVKKYEVVNPEIF  
VRF SARVEGILEDYRAKRLSESEFKDLLKDPLEQNLAKDFNNADVGQIIALLDSEFS  
KFANVPEFDESIENKITTELIVKMVPFLEKINKVNDIENYIKSLIKIYLGKRGGSV"

gene complement(120994..122109)  
/locus\_tag="DMACINML\_01334"

CDS complement(120994..122109)  
/locus\_tag="DMACINML\_01334"  
/inference="ab initio prediction:Prodigal:2.6"  
/inference="similar to AA sequence:RefSeq:ATG65708.1"  
/codon\_start=1  
/transl\_table=11  
/product="N-methyl-L-tryptophan oxidase"  
/protein\_id="Prokka:DMACINML\_01334"  
/translation="MTYDIAVIGSGSVGSFAGYYAAKMGKLTCLIDKFQAPHTQGSYH  
GDTRIFRIAYGEGEKYIPLLQEAYTLWGEFEKEQNIKLFERCGLLNIGSNSTFMQNVL  
LSVKNYDLKAKILNAKELQENYNICVSDDFFGVLETDGTFVYSVLSVKSAINAACKLG  
AHTLCDEIVRICKENGVYKIQTQNSSIQAKQILISAGSYVNEVLSVCEFDLPKVPVGI  
RRKVVNWFDTSYKLSQGFPAFILEFEDDYFYGFPDFADGLKVGDRDRVGEIISTREER  
VEFGSYEQDTLDIGKHIKEFFPDLKDFSKGSVCTYPLSPDDDFIIDFLDENLFFMGGL  
SHGFKFAPALGGLGVKALQTQKLDPSIKQYFSLKRFG"

gene complement(122347..122856)  
/locus\_tag="DMACINML\_01335"

CDS complement(122347..122856)  
/locus\_tag="DMACINML\_01335"  
/inference="ab initio prediction:Prodigal:2.6"  
/inference="similar to AA sequence:RefSeq:ATG65709.1"  
/codon\_start=1  
/transl\_table=11  
/product="flavodoxin family protein"  
/protein\_id="Prokka:DMACINML\_01335"  
/translation="MKTLIIFAHTFWEDSKVNKALFESIKNLKQVQIHNLSIYKEGK  
IDVSKEMDLLKNADKIIFQFPLFWFSTPALLKEWQDRVLTAILYGENKELLKDKKFQI  
VTTLGGAQESYDGHGATLEELLKPIYYTFEYLGCKSLKPFIFSANANKLDLKAYQD  
AISQNSGCS"

gene 122959..123858  
/locus\_tag="DMACINML\_01336"

CDS 122959..123858  
/locus\_tag="DMACINML\_01336"  
/inference="ab initio prediction:Prodigal:2.6"  
/inference="similar to AA sequence:RefSeq:ADT66782.1"  
/note="conserved hypothetical protein"  
/codon\_start=1  
/transl\_table=11  
/product="hypothetical protein"  
/protein\_id="Prokka:DMACINML\_01336"  
/translation="MQNQDKFLKQFKLALLDKNIRLVTLEGSRVNKKAKKDKYQDYD

```

ISFFVPLDKMKDFLGLNEKQNFNECKNLPKCILELEKSSYFKKILMLQMPECMEFYPP
DLPQNWISFLVLFESGVRDLTIIPLEDLKNYYEFELSQLLDKNGLFTH TIPKAPF
SITHLSQRSFDDVCNEFYFLYSCLKKALLRKQFILSNHLLNSLRKALFDLLSFKIGLN
FGFEIWLKKEYTNILEFLEEKEVKIILKSFNATLEHIKKARKKLEILFHKNAKFVAK
KSDFKLFPYRKNVKRYCKILGKL"
gene      123972..125375
          /locus_tag="DMACINML_01337"
CDS       123972..125375
          /locus_tag="DMACINML_01337"
          /inference="ab initio prediction:Prodigal:2.6"
          /codon_start=1
          /transl_table=11
          /product="hypothetical protein"
          /protein_id="Prokka:DMACINML_01337"
          /translation="MQQSLNELEYKTLREWFYKIFDNKSYKNKQMFKNLEDFLENFN
KDHALSFCINKYNNAKISQINASVLKPVESILKKLDIWNLLKLEGLCLEELPSFVLELK
NLQTLSLYENNFWQLDKINELKNLKKLNLAHNCFCIPLSLPNLTHLSIYGNLIENK
NEADSIGLKNLNTPNLKKLDLGNALNYFPREILEFKNLKKNLSSNKITSPLSLLSL
QNLKILNLSCNALSEISKELTTPNLEYLDISYNKLTSLDTSFYEAKFELIKEGNKIP
LTDYEKDRTSHLTQKEFKAFSTWLWNNCHDCGLMLEDMLDEFRWYDDYGYDAPELKEW
LLQTRVFGLLRDCPEVHELKELGKLGKLGKIDVSYHPKELPSTIFGIKSLEYLDIS
DTDISELSSEIKNLEELRLDISGTSINSLPKEILECKKLEHILVDEDFIIPKNFPKN
LIKTSLNEEEEWKKFNYN"
gene      125386..127557
          /locus_tag="DMACINML_01338"
CDS       125386..127557
          /locus_tag="DMACINML_01338"
          /inference="ab initio prediction:Prodigal:2.6"
          /inference="similar to AA sequence:RefSeq:CAL35498.1"
          /codon_start=1
          /transl_table=11
          /product="ankyrin-repeat containing protein"
          /protein_id="Prokka:DMACINML_01338"
          /translation="MQKPAKVLEKQLINAVENLNVEAVKLLDEGAPINAKVEHYGEE
SHLFGDLYRDYWHNYRFEDKQKEVQLMKKILDFFASNQKIEGEFGKGDNLLCFMIE
HNYLLDCGKLLRLEPEINTQNIYENPLMIAVRYRKNKAVELLLKHGADVNLAAAGTP
IEYAITYNLEVLPLLLLENGGSVDEAFVEACRKGDEGLIKELLSKGAKIDSTNRHNQNA
LFFQKAYTNKNI FNMLLESGVNIHDKNGFTPIFRVIYNKDTDYLEIFLEKGAIDIA
KNNADITPVHYAYNRGFQKEANLLVRFGANVNNQDNEGITPLMQSIIIEGKQNAFKALL
KAGADISLKDGDVYSLIKSQIDKKSQKAWHEELIATTKPVKIKKPTPKSTKVSTPK
VAKLKYFPTTKEELLKLVEDSKVKLETIDTSKIKDMSCIFEESSKRRSFKGLETWNVEN
VENMEDMFRAKFFNHDISAWNTKSLKNMQGIFYECENFNQPLDKWDVSKVTNMAWAF
YRCIKFNQPLDSWDVSSVTSMDHTFNRCIEFNQPLNSWNVSKVETMCAMFMDARRFNQ
PLDLWNTSKVKEMGHMFSGAFS FNQNIESWDTSNVEGMSSMFSEAVS FNQPLNNWNVS
KVIYMQCMFYGGFGGEGGAMSFNQPLDKWDVRNVKMDRIFSNCRKFSQNIDNWQVRK
DCRFSYEF TDLQGEFAGSSLTKLPKWYAQIIIEEQAQKKQG"
gene      complement(127601..127849)
          /locus_tag="DMACINML_01339"
CDS       complement(127601..127849)
          /locus_tag="DMACINML_01339"
          /inference="ab initio prediction:Prodigal:2.6"
          /codon_start=1
          /transl_table=11
          /product="hypothetical protein"

```

/protein\_id="Prokka:DMACINML\_01339"  
 /translation="MSFKDLKDYIALCVKGESMVKEKLDIILNLKEKTLKDMQKLQTI  
 LEKLDFKIEYYEKMIKESKDELNPLSKDYVKKRKRVEI"  
 gene complement(127941..128288)  
 /locus\_tag="DMACINML\_01340"  
 CDS complement(127941..128288)  
 /locus\_tag="DMACINML\_01340"  
 /inference="ab initio prediction:Prodigal:2.6"  
 /codon\_start=1  
 /transl\_table=11  
 /product="hypothetical protein"  
 /protein\_id="Prokka:DMACINML\_01340"  
 /translation="MQIKLLFNGKELLVNLEQNEASRQFYNTLPLELEFSDFIGKEKI  
 AHLPKALNAKGSSAYKPQIGDLFYYPWGNIGIFYELQANEDLVFLGKIQGNLELLK  
 MQKGDFKVKIIE"  
 gene complement(128349..129218)  
 /locus\_tag="DMACINML\_01341"  
 CDS complement(128349..129218)  
 /locus\_tag="DMACINML\_01341"  
 /inference="ab initio prediction:Prodigal:2.6"  
 /inference="similar to AA sequence:RefSeq:SQE25044.1"  
 /codon\_start=1  
 /transl\_table=11  
 /product="carboxymuconolactone decarboxylase"  
 /protein\_id="Prokka:DMACINML\_01341"  
 /translation="MKRRNFLNLSVKTFMLLGAMSSTLFSQALKTTKEKTMQLTQKAR  
 EIFERLLGGVSRDLLFASDKEYFTHHINFTFGESFTKANLDKEYFLITLASTLAVGG  
 RIEFKTLKGAINDISPISIKVEVIYQATPYVGFARVRDFLSLCNDIFKKLEIELPLA  
 PQSTTTEENRKIKGREVQNAIFGEANITKMIESTPKDKAFVNDFLSANCFGDYTRNG  
 LDLKTRELLTLVYLISLGGVDNQVKAHISGNLNMGQSRELLNIIAALIPYIGYPRAL  
 NAIAVLDSLTLKA"  
 sig\_peptide complement(129132..129218)  
 /locus\_tag="DMACINML\_01341"  
 /inference="ab initio prediction:SignalP:4.1"  
 /note="predicted cleavage at residue 29"  
 gene complement(129230..129724)  
 /locus\_tag="DMACINML\_01342"  
 CDS complement(129230..129724)  
 /locus\_tag="DMACINML\_01342"  
 /inference="ab initio prediction:Prodigal:2.6"  
 /inference="similar to AA sequence:RefSeq:ADN91685.1"  
 /codon\_start=1  
 /transl\_table=11  
 /product="hypothetical protein"  
 /protein\_id="Prokka:DMACINML\_01342"  
 /translation="MRKILCLVALSVTFVFANTANKGENMQRVEKAGTHGSFKGDSKI  
 FSGEVKNMMFKANEWRDFSGGLVEFSKGARSAWHTHPKGQTLIVTEGEIITKAEGQK  
 AVIAKKGDVISCPIGVKHFHGATDSINGAHIALTSEIEGKNVEWLELVNDEEYKNALK  
 EARD"  
 sig\_peptide complement(129671..129724)  
 /locus\_tag="DMACINML\_01342"  
 /inference="ab initio prediction:SignalP:4.1"  
 /note="predicted cleavage at residue 18"  
 gene complement(129733..130752)

CDS /locus\_tag="DMACINML\_01343"  
 complement(129733..130752)  
 /locus\_tag="DMACINML\_01343"  
 /inference="ab initio prediction:Prodigal:2.6"  
 /inference="similar to AA sequence:UniProtKB:Q01609"  
 /codon\_start=1  
 /transl\_table=11  
 /product="hypothetical protein"  
 /protein\_id="Prokka:DMACINML\_01343"  
 /translation="MKNNFFKLLLMVLLIGGANMLYATTWDKVFTQSDKVKIQKVSFK  
 NRYGITLVGDLYIPKNAKSKKLSAIAISGPFQAVKEQASGFYAQTLAESGFVVLAFDP  
 SFTGESGGSPRNVASPDINTEDFSAAVDFLSNLANVDPSKIGILGICGFGGFALNAGS  
 MDTRIRAIVTSTMYDMSRVNAYGYNDSLQKARYELKKKLNEARTKDFKNGTFELAPT  
 LPQKLSGNEPQFIKEYWEYKTKRGFHKRSINSNGAWNATSSLGFINAPILEFSDEIN  
 VSVLMIHGENAHSRYFSEDAFKNLKGDNKELLIVKNANHVLDLYDNADKIPFSKIAEFF  
 KANLK"

sig\_peptide complement(130681..130752)  
 /locus\_tag="DMACINML\_01343"  
 /inference="ab initio prediction:SignalP:4.1"  
 /note="predicted cleavage at residue 24"

gene 130925..131680  
 /locus\_tag="DMACINML\_01344"

CDS 130925..131680  
 /locus\_tag="DMACINML\_01344"  
 /inference="ab initio prediction:Prodigal:2.6"  
 /inference="similar to AA sequence:RefSeq:APA48628.1"  
 /codon\_start=1  
 /transl\_table=11  
 /product="restriction endonuclease"  
 /protein\_id="Prokka:DMACINML\_01344"  
 /translation="MKKDINKLPQLLSNIIIEFLKTNTFSLSKTSRDGRINSVFNENEI  
 LNLIEQKFNITRPNVRNWMDFSEENGFIPVNIKVSTTETDNLNCKLGIYYALTGK  
 IPSFGNEIPWKYFENLSSDMTENDKDYYFLIINKNNTNEVFATSLKSLKSIKPNGNN  
 LPFQAKWVDNKIMENRSYEEAKRFLSCFGKSLEKMAEAYQYFQTYFNEFYDSRFDY  
 IQDCNCRANKHCYITNTINGKIVTHCRCNNNES"

gene 131670..132848  
 /locus\_tag="DMACINML\_01345"

CDS 131670..132848  
 /locus\_tag="DMACINML\_01345"  
 /inference="ab initio prediction:Prodigal:2.6"  
 /inference="similar to AA sequence:RefSeq:APA48629.1"  
 /codon\_start=1  
 /transl\_table=11  
 /product="SAM-dependent methyltransferase"  
 /protein\_id="Prokka:DMACINML\_01345"  
 /translation="MNLNVKILGQVFTQNIIVMDMLTLVKNNGRFLEPSCGNGAFFKN  
 LPQNKVGIELDSSVIEDSRILNIDFFNYPLSEKFDTIIGNPPYVRYADINHDTKILLS  
 NFSAIFDERSNLYLFFIYKSIHLKPGGELIFITPRDFLKSTSSIKLNEFIFKEGSIT  
 DFIDLGDKKIFTQAQPNCAIWRFEKGNFTRNTNCLREFSCINGQILFTKSHYFIPFFT  
 LFFVKVGA VSGADSI FANEEFGNMEFVNSTTNKTGKTKKMIYGEYGKCKYLQSFKGR  
 LLKRKIKRFSESNWWQWGRDYKSDLPRIYVNTKTRNKKPFFLHKCEAYDGSILAIIFP  
 KFKVDLIMLQHLNRLNDIDWQELGFVCDGRFLFSQRSLQNCLLDESFKFLHMTQSN  
 "

gene complement(133027..133827)

CDS /gene="dkgA"  
 /locus\_tag="DMACINML\_01346"  
 complement(133027..133827)  
 /gene="dkgA"  
 /locus\_tag="DMACINML\_01346"  
 /EC\_number="1.1.1.274"  
 /inference="ab initio prediction:Prodigal:2.6"  
 /inference="similar to AA sequence:UniProtKB:Q46857"  
 /codon\_start=1  
 /transl\_table=11  
 /product="2,5-diketo-D-gluconic acid reductase A"  
 /protein\_id="Prokka:DMACINML\_01346"  
 /translation="MKYQILNGLKIPIMGFGTARLQGRECFNVLNNALECGYRLIDT  
 AQMYKNHKDIAKVLKESQIPRKELFIESKISQNSLSYLQAKDVIYKILDELGLEYLDDL  
 LIHEPYENSLQIYDAMQEAFENKLIKSLGVSFNENLLFDFIQKVTIKPVINQCETHL  
 LYQQKSLHKALQKHDIFLQSWSPFIANKNKIFNHPLLLCMAKKYSKTPAQIILNFLYK  
 LGILLIPKSSNLQRMKQNLQIFDFELEDEDTQKLIYLDQNKSFYGGWYE"

gene complement(133831..135024)  
 /locus\_tag="DMACINML\_01347"

CDS complement(133831..135024)  
 /locus\_tag="DMACINML\_01347"  
 /inference="ab initio prediction:Prodigal:2.6"  
 /inference="similar to AA sequence:RefSeq:ABV53053.1"  
 /codon\_start=1  
 /transl\_table=11  
 /product="transporter, putative"  
 /protein\_id="Prokka:DMACINML\_01347"  
 /translation="MQALNQEKSNSLSDIKIILVLC LGVFGILSTELGMMGIPIVSQ  
 NFSVSI SDAGWSVSIFALVITFCAPIVPLLCANFNPKKMLICLAVFILSSLIAAFVS  
 EFWQLLVFRAIPAFFHPIYIALALSMAANLASDKKDIPKNVGKIFA AVSAGMVLGVPL  
 TSYLGGNFGFEISMLLFVFLNLLSFVATLFFVPNFKKENKVKIGKQLLILRYPLLWIS  
 ILCVCINAGIWFYSYFSDFLSISKINFDLISIILALYGFANIIGNNLAPKLLIKN  
 VNLNLI FTLLLMI GIYVLI FNFYQNMILMILAFILGILGGVMNNGTHFLISHPFPR  
 KDFTNGLFISVANIGLSIGTAICGLVISLSNTRFIAISSVILLSFGIVMILLRDKIQS  
 MKLRF"

gene 135174..136121  
 /locus\_tag="DMACINML\_01348"

CDS 135174..136121  
 /locus\_tag="DMACINML\_01348"  
 /inference="ab initio prediction:Prodigal:2.6"  
 /inference="similar to AA sequence:RefSeq:ATG65711.1"  
 /codon\_start=1  
 /transl\_table=11  
 /product="permease"  
 /protein\_id="Prokka:DMACINML\_01348"  
 /translation="MQVFFNTFKEFLYLFVELSVLFIGISFLISIIINQKYEGMFRKQL  
 SGDKISSYFKAIFLGALTPFCSCSTIPLLKAFLEARVKSVC LAYLFTSPLINPIIFT  
 MLFVTFGLKLSLVYVFLVIFIFIISLIFSKFKEEYFLKHTPKNSAPSIFTQNTKNIG  
 KIVLKPSSCCANTQSKANDTKINFKLFKESVINYKLLPYIVIAVLIGALIHDFVPQ  
 EILQKYLSGNEILSII LAFFGVLLYLRVETIIPIGLILLQMGISQGVIMSFLIAGAG  
 CSLPELILLKQMFKMKFLLL FVAIILSVAISFGMLINFI"

gene 136132..136449  
 /gene="arsR"  
 /locus\_tag="DMACINML\_01349"



CDS 136132..136449  
 /gene="arsR"  
 /locus\_tag="DMACINML\_01349"  
 /inference="ab initio prediction:Prodigal:2.6"  
 /inference="similar to AA sequence:RefSeq:AAW36157.1"  
 /codon\_start=1  
 /transl\_table=11  
 /product="arsenical resistance operon repressor"  
 /protein\_id="Prokka:DMACINML\_01349"  
 /translation="MQKFLTIISAINDESRVLILYHLLKYQELCVCDLQKLLNMGQSR  
 LSRHLKILKDAGFLYVKKRGTWAYYGISDELLKLHSDLFENIKNLDIDIVVLENNTCK  
 DDK"

gene 136446..136868  
 /gene="arsC"

CDS 136446..136868  
 /gene="arsC"  
 /locus\_tag="DMACINML\_01350"  
 /EC\_number="1.20.4.1"  
 /inference="ab initio prediction:Prodigal:2.6"  
 /inference="similar to AA sequence:RefSeq:AAW36158.1"  
 /codon\_start=1  
 /transl\_table=11  
 /product="arsenate reductase"  
 /protein\_id="Prokka:DMACINML\_01350"  
 /translation="MKLAFICIHNSCRSQMAEALARHKAEMGIDIEVFSAGSDTSKG  
 VNLQAIRLMREIYQIDMKKHYSKLIDSLPQNLDIVVSMGCGVACPSLKSRYYDFGLK  
 DPSGSCDDEFKIIQILDSKLTALLQAIKTNSLKGFR"

gene 136862..137890  
 /locus\_tag="DMACINML\_01351"

CDS 136862..137890  
 /locus\_tag="DMACINML\_01351"  
 /inference="ab initio prediction:Prodigal:2.6"  
 /inference="similar to AA sequence:RefSeq:AAW36159.1"  
 /codon\_start=1  
 /transl\_table=11  
 /product="arsenical-resistance protein, putative"  
 /protein\_id="Prokka:DMACINML\_01351"  
 /translation="MLGFIDRFLTLWIFLAIIFLGLVLGIIIFPDIALFWNLFYKSVNV  
 VLTLCILMMPPLAKVDYAKLSKVFDSSKKVILLSMILNWFIFPLLMFILAFIFLKDE  
 PLYMQGVIIIGLARCIAVVVWSDLAKGDREYTSALVAMNSIFQILFFSTLAYIYLDL  
 LPKLLGQSTLATSIDIFSALSKNVLIIYLGIPFLMGFITRLLLLKYKSKQWYENTFLP  
 KISPITLITLLVTIIIMCSYKANEVHFLPLEALKIAFVLTLYFIIMFFLTWFISKKNH  
 LSYPKTCSLCSASGNNFELAIICIATFGLHSEQAFASIIIGPLVEVPVLILLVKKWAL  
 GKSLNSKK"

gene complement(137899..138327)  
 /locus\_tag="DMACINML\_01352"

CDS complement(137899..138327)  
 /locus\_tag="DMACINML\_01352"  
 /inference="ab initio prediction:Prodigal:2.6"  
 /inference="similar to AA sequence:RefSeq:CAL35660.1"  
 /codon\_start=1  
 /transl\_table=11  
 /product="putative transcriptional regulator"

/protein\_id="Prokka:DMACINML\_01352"  
/translation="MAYTIKEVEKETKISSHTLRFWAKKGLFPFVQKDENGVKYFSKS  
DIEWAKWIEWLRISGMQIEQIRHYIKLCSLGIKTAKERQDMLKQAKKLLQTQIKTLKE  
SEKVLSSKKIKIYEEMLANEVDGFNPESKDYQPCDKFKES"

ORIGIN

1 tgcttctaaa tcttttttaa ctagatttat atcatcacca cgagagtatt tatccatagc  
61 aatacatttt tttctatctg ttatacaaaa aagacaagtt tctctttttc caaaaggaag  
121 ctctaaaagt attttttcgg attttttaat tttttcttca cactctatta tatgtttcgt  
181 aaaatacgct tcatctctct tagtatctct tagcattttt tatccttttt attatgggat  
241 ttgtttgata aaacctaata agtttatata atttatgatt ataataatatt atatattaat  
301 caatcttcac atactaaaac ttcactaaaa ctaaaaccta ataaattggt ttctcttaca  
361 catttttaaaa aatcctaaca aagatcattt tctatagaat gtttttaaac atcaaatact  
421 tctatacttc catcatcata ttctatagta aagtcccttt cttcaatggc tttttgatta  
481 ttttttagaa tttttaatgc ttgttctttt tgattaagtt ctataagtag taaaacttgc  
541 attaaggttc tatcttgcca aatagtatct tcattttctt cataattata aataaaatca  
601 taaagccctt ttattgtggt agtagtatca gttttaaaag cttcaataag agtatctata  
661 ctttctttat aagcttttaa aaaactatga taagaatcac ttggcatatc atctaacca  
721 gattgtttta aatcattcaa attggtaaatt tccatacttt taaaagaaaa tggaaaagat  
781 ctaacgcat gttgatttaa aattttaaaa tctaaattag gctgatcaag tcctactatc  
841 ttacataaaa tttcatcact tttcatagat tttactctaa aagaacact aaaacttatg  
901 caatcatctt cttcttctaa ataatgttca aaagtaaaaa gtaagtcgtc aaaaacacca  
961 taagtataaa attcttctgt ttttaaacca tattgtgctg aaaatttgc cagtttttg  
1021 caaaatttta gaacaatc atctaagatt tcttgtcgtt ttattgaaat tccttttgtt  
1081 gatttgatg ttgttattcc gctagggcgt gatattttta ttgtaacatt ttttgataat  
1141 attttatctc ctttttttag cattttattg tcatatttca aaactttatt acctcgtagt  
1201 tctattgtta tgcattgtt ttttttgact tattaatta aatgctttta tttgattttg  
1261 tgtaggggga gcatctttag atgattttgc ctccctgata ataattttac ctttacaatg  
1321 agctattgca tccactctgg ttgtaacaat ggggtttattt ttatcataaa ctctgagagt  
1381 tacttgggat tgtgcattag ggcattcttt tttaaatc ttaaaatcct tttgctcaaa  
1441 tcgtttgccg ttaatttgat tttccttaag ttgtttgcgt tttttatctt tatcattaaa  
1501 ttgagtgcga gaaaaagta ttttacatga atgatttttc ttacttcttt tacctctat  
1561 cccttcccat cttatcctat catactcaat ctagcaaga ggactagctt gtattttagc  
1621 taaagcaaat tgaatcttat tctttttggg tatagcaaat tctagccatg aaaagccttg  
1681 tgggttttta aaccactaa gattaaatta aattataagg aaagtattta cgtaaagcta  
1741 atcctatttt gcttaatcat tctggcacga ttgataagag cataaagggc tatatcttca  
1801 tcattcaaca tttttcaaa agtttactg tatctatcc catcaaactc aatacttctg  
1861 tattctataa tctctgcttt agcattagt ataaaagaaa tgtatttatc tctttgttta  
1921 tcgtgtttta tacctgcaca taaaggttta agtgcttcat cataccaaat cacttctaga  
1981 ttttcttctt tgatgattct tagtgctact tcttttctat tttgattga atagtcttca  
2041 tttacgctaa aatatttttg ttcataatcc atctgtaaca ttttatcaat ggcttctttt  
2101 tcaactatcaa agaatagtt aagactaaca ctccccctt ctccaacata gaaagtttgc  
2161 tatttattat tattagaatc aaaccacata gtaagatggt attctcctga atgtttataa  
2221 gaaggatacc aatctgtatc aatcaacttt tcttctttta taattaattc tgcttgttct  
2281 cttgtcattt tctatccttt attatgggat ttgtttgata aaattaatat gttattgtaa  
2341 tttatgaata cagtatttat taatcaatct tcacatacta aaacttctact aaaactaaaa  
2401 cctaataaat tgttttctct tactcttttt ctaaattcat ttgatacaaa aacaggtatt  
2461 tcatcatctt taattctaaa tatatgactt ccatcaagtt ttgatttttt taaaacagcc  
2521 ttagtaatgc ttaaataatc atcattatca ccatataag tatatacaga atgttcataa  
2581 tctaaagctt caagtgattt tgttacatgc ataattttac aatcataata atttatttcc  
2641 tgacttctaa tttctacatc taaatattgc acacaatctt tgattaaatc ttgcattaaa  
2701 tttataaatt ttggagagac tatacgccaa aatataggag caagtttggc gattttccc  
2761 accaaagccc ttgaggacaa aatctaaata gtttctcctt ttggcatatta tagccttata  
2821 tgttttaatg gctgtattta atcgttaaaa tcatcattgt tattgagagg aagttttctc  
2881 aaggaaggca tatcaacca agctagccat aaataaagtg caaggcaaat ctataaagag

2941 agttacattg caatataatt gccataaat ttagcataaa ctcattataa ttttgcaatt  
3001 tagattgtta ggaaaatat gatagaaaa aaataaagca aagcattaaa gaatggattt  
3061 tagagataaa taggcaagaa gctttgccaa aagggttgt ggctttaaat tttgggcttt  
3121 ttgagcctta tgggatagag ttgattggag cagaaaatta tgatgaaaat gatgatgatt  
3181 gggcgtgtga agaagatfff gtgccaaagc ttagaatctg tcctgcacta gaaatcccaa  
3241 gtgatttaga atgggaaagt gtgctagagc tgatgataga ttttttaaaa gaattagtta  
3301 tggagctaaa acatataaaa ttattgcaag tcccacacat taccaccgga ttttgtgatg  
3361 gggatcttga aataatcaaa taaataaact ttttagcaaa atgattaaaa tcgcactcct  
3421 tttggcgtcc cattcattca aagggtcctt acgcaaagcc tctattgctg ctaaaagttg  
3481 tgtatctaaa tcttgtgcca taactttcct tgttttaaaa tttttgtata attttaagaa  
3541 ttatataata gattttttta atacggcata gaaaggcttg atgtcttgca gtttgataca  
3601 gagatacaag atgagataat tactctaaaa aaggcacaaa aattcgctca tagctagctt  
3661 tcttttttaa ttctgcaatt gtttgacatt gatactacta aaatagttca ctcatatcag  
3721 taattttact tgtattaata ttagctagat atacatffff aagtatfff tttgtaaaat  
3781 tactttttat catattaaaa ataaggffff attttgcttt ctttaaaatt taaaattcaa  
3841 gagcatcttc aatgtaaaaa ttgtcttaag ataaaccctg aagaagatac taaatfffft  
3901 atatffffat gaaaagatff aaatcatccc gcaagacaaa ggcttgatta tatttacagt  
3961 aaaaatcccc ctatcatagt agcgtfffft gcaaaagtag caaaagcaga tgataaaatc  
4021 atcacaaaag atttatccaa atttatatct tctttgctcg ataagacaga gatgttttat  
4081 tctaaagaat acagtggatt tagaaatact tatgcaagca tttttgagca tgaaaaaaat  
4141 caaggcagaa gcatctatga actttgcaat agtgcaagat tttacgaaaa agaaatcgat  
4201 tttctcatat gtttactgct tgatttgata tattatgatg caaaaatgag cgcaaatgaa  
4261 aatgctctta tggaaaatat catcatagga cttggattaa accttataaa atttagagaa  
4321 gtaaagctaa aacaagaaaa attatagaaa attagcctat gaaattatca aagaacaag  
4381 gggatatata tgcttatttg taatcattgc aatacaaaaa atttagatgc agctaaattc  
4441 tgcaaaagat gtggaaatag tgatttatac gatccacaag cagaagaaaa actagaacaa  
4501 gaaagaagac tagaagagga gaaaagaaaa atggctcaag aagaaaaaga aaaaagactc  
4561 aaacaagaa aagaatffat cacaaaacac aaaagcaaaa tcataattag catgggtgggt  
4621 ttctttttga tagcttcaat aagcatatat cagtatffff atgggtgaaa atacagcaaa  
4681 gcctatataa gcaaacctga ggaaaaatgc gatgatggag atggtaaagc ttttttgcct  
4741 agtatctttg taagcggatga ttttaataaaa gtagaaatcg atggacagtg gagcttctta  
4801 gataaaaacg gggaatffat agcaaacctc gaatffgata gtgtttcgac ctttagcgaa  
4861 ggattggcaa gagttgggtt aaatggaaaa tctgggtttta tagataaaaag tggaaaaatt  
4921 atagcaaacg ctgaatffga tgatgttggg gtttttagtg aaggattggc aagagttgag  
4981 ttaaatggaa aatggggttt tatagataaa agtggagaat ttgcaatcaa gcctgaatff  
5041 gataatgffg gggatfftag cgaaggattg gcagcagctt ttttaaatgg aaaaatgggt  
5101 tttatagata aaagtggaaa aattgcaatc aagcctgaat ttgatagggt tcatatfff  
5161 agagaaggat tggcaccagc tttgttaaat gaaaaatggg gttttataga taaaagtgga  
5221 gaatffgcaa tcaagcctga atffgatgat gtttggaatt ttagtgaagg atffgcaaga  
5281 gttgaattaa atggaaaata cggttttata gataaaagtg gaaaaatcat agcaaacctc  
5341 gaatffgata aggtffggga ttttagagaa ggattggcga aagttffggt aaatggaaaa  
5401 atffgffffa tagataaaaag tggagaatff gcaatcaagc ctgaatffga tggattaggt  
5461 gatfftagtg aaggattagc ggaagttgag ttaaatggaa aatacggfff tatagataaa  
5521 agtggaaaaa ttatagcaaa gcctgaatff gatgatatff catatfftag cgaaggattg  
5581 gcaccagffa agctaaatag aaaaatgggt tttatagata aaagtggaga atffgcaatc  
5641 aagcctgaat ttgatgggtg tcatatfff agagaagggt tagcaccagc tttgttaaat  
5701 gaaaaaattg gttttataga taaaagtgga gaatffgcaa tcaagcctga atffgatgat  
5761 attaggaatt ttagcgaagg atffgcacca gctttgttaa atgaaaaatg gggttttata  
5821 gataaaagtg gggaatffat agcaaacctc gaatffgatg atgttgggga ttttaaaaaa  
5881 ggattagcaa aagttgagtt aaatggaaaa tatggtttta tagataaaaag tggaaaaatt  
5941 gtaatcgagc ctaaatffga tgatatagac tattaaatct ctattatctc ctcttatct  
6001 tctaaaacat agactaaaaa agcttgagtt gatttcttag ccaagatctt ctcgatctca  
6061 agctffgcta tttttcgctc atagctagct tctttctta atctgcatff agctagatat  
6121 acatffftaa gtttttctt gttagaatta ctttttatca tattaaaaat tttgtaatca

6181 ttgcaataca aaaaatthag atgcagctaa attctgcaaa gagtgtggaa atattgattt  
6241 atacgatcca caagcagaag aaaaactaga acaagaaaga agactagaag aagagaaaag  
6301 aaaaatggct caagaagaaa aagaaaaaag actcaaaca agaaaagaat ttatcacaaa  
6361 acacaaaagc aaaatcataa ttagcatggg gggtttcttt ttgatagctt cgctaagcat  
6421 atatcagtat ttttatgggtg gaaaatacag cagagtttat ataagcaaac ttgaagaaaa  
6481 atgccactac gatgatgaaa atagctgtaa aatgctccaa accatctata aagaaaaatg  
6541 cgatgatgga gatggtaaag cttgttttgc tagtatcttt gtaagcgggtg atttaataaa  
6601 agtaaaaatc gatggacagt ggagcttctt agatgaaaac ggggaattta tagcaaagcc  
6661 tgaatthgat agtgtttcga ccttttagcga aggattggca agagttgagc taaatgaaaa  
6721 aattgggttt atagataaaa gtggaaaatt tatagcaaag cctgaatttg atgatattag  
6781 gaatthtagc gaaggattgg caagagttgg gttaaattgga aatgggggtt ttatagataa  
6841 aagtggaaaa atcatagcaa agcctgaatt tgatgatggt ggggatttta acgaaggatt  
6901 ggcgaaagtt aagttaaatt gaaaaattgg ttttatagat aaaagtggag aatttatagt  
6961 aaagcctgaa tttgatgatg cttggagctt tagtaaagaa ttagcagcag ttaagttaaa  
7021 tggaaaaatt ggttttatag ataaaagtgg aaaaattata gcaaagcctg aatttgatga  
7081 tgcttgggat tttagcgaag gattggcagc agttgagtta aatggaaaat acggttttat  
7141 agataaaagt ggagaatttg caatcaagcc tgaatthgat gatgctgggg tttttagcga  
7201 aggattagca ccagctttgt taaatgaaaa atggggtttt atagataaaa gtggagaatt  
7261 tgcaatcaag cctgaatttg atgatgcttg gagctttaga gaagggttag cgaaagttaa  
7321 gttaaatgga aaatacgggtt ttatagataa aagtggagaa tttgcaatca agcctgaatt  
7381 tgataagggtt tgggatttta gagaaggatt agcggagggt gggttaaatg gaaaaattgg  
7441 tttataaat aaaagtgggg aatttatagc aaaacctgaa tttgatgata tttcatattt  
7501 tagcgaagga ttggcgaag ttaagttaaa tggaaaaatt ggttttatag ataaaagtgg  
7561 aaaaattata gcaaagcctg aatttgatga tgttggggat tttagtgaag gattggcgaa  
7621 agtttggtta aatggaaaaa ttggttttat aaataaaaagt ggggaattta tagcaaagcc  
7681 tgaatthgat gatgttgggg atthtagaga aggattggcg aaagtttgg taaatggaaa  
7741 aattgggttt atagataaaa gtggaaaaat tatagcaaag cctgaatttg ataatgttga  
7801 tgatthtaga gaagaattag cagcagttaa gctaaataga aaatacgggtt ttatagataa  
7861 aagtggagaa tttgcaatca agcctgaatt tgatagggtt tcatatttta gcgaaggatt  
7921 ggcagcagtt aagctaaata gaaaatgggg ttttatagat aaaagtggag aatttgcaat  
7981 caagcctgaa tttgatgata ttaggaatth tagcgaagga ttggcaccag cttgtttaa  
8041 tgaaaaatgg ggttttatag ataaaagtgg aaaaattata gtaaagcctg aatttgatta  
8101 tgttgggat tttagagaag gattagcaga ggttgagtta aatggaaagt acggttttat  
8161 agataaaagt gaaaaattg taatcgagcc taaatthgat tatatagtct attaaatctc  
8221 tattatctcc acctatctt ctaaacata gactaaaaaa gcttgagttg atthcttagt  
8281 caaatcttc tcgatagctt cttataaag caaacctgc tcttgtgtt tgttgaat  
8341 caaacctgtt ttataatcta taatgatggc ttcatttca ccaaagcaa gtaaatacag  
8401 ctgthgatc tcacctgaa aactcaaagc ttgctcttg agtaattttt tattttcgat  
8461 gagthtttga aattgggcat tagcaagtaa atthtttatc cthtaaaaa gctthtcaa  
8521 atcatcgtga thtaaaaaat gtctaaatt accactcact thctgacaaa gaatgtcaa  
8581 atthctcct tgtggaagct thaaatthg ggctthttga gccttatggg atagagttga  
8641 ttggagcaga aaattatgac gaaaatgatg atgattgggc gtgtgaagaa gattthgtgc  
8701 caagcttag aatctgtcct gcactagaaa tccaagtga thtagaatgg gaaagtgtgc  
8761 tagagctgat gatagatatt thaaagaat tagttatgga gctaaaacat ataaaattat  
8821 tgcaagtccc acacattacc accggattht gtgatgggga thttgaaata atcaataaa  
8881 taaacttht agcaaaatga thaaatcgc actctthgt thtttaatc gtgagattat  
8941 gctaagctc atthttttat cthttcacct atthattcaa gctaaaaagg aatatcaag  
9001 tathcttht gctccaagtt thcttaaaat cgcattgtat thttgtagat aathctctac  
9061 thctctgtg thcttgctt thttaatatc ctgactata aathcttht thcttggtc  
9121 taaacttht gaggcaaat actcatacca thcaatata tgcgaaccth caggcatata  
9181 thctthtaag acacactcaa gcaatggctc thctagctc thttctatth thctthtact  
9241 aaaaatcca thttctagt ctaagatata caagctacca thttgaaagt thaaatctgt  
9301 atctthtagc cathttgct thtagagctg cagtatctc thcatgctth thttgcttat  
9361 thgcctacga thgatagata aacctthg thctthcatt thctcaatga thctcaccaca

9421 atcaaataaa attttcacaa tatccgcctt tcctacgctt gcggcattgt ctaaaaagct  
9481 cattctttgt ttatcttttt gcccgatttt tagtgctatt ttaggatctg tggcactttt  
9541 tttgatgagt tctaaaagct ctagtgggca atttcctatg gtattttctt tataaaattc  
9601 tctctcgccc atagctaagg catagattct agctagatct ttatcattca ctttttctt  
9661 ttcaagcaat gttttaagcc cttgtagtgc cctatcataa tagcttttaa aaaacgcttt  
9721 ccctttttca tattcatcat cgcacatttc ttttaagaga tcacagattt ctttcacgct  
9781 ttctgggatt ttttgcggtt cttgaagcca ttttgggaag ttattttcta gctttgtgcc  
9841 atgaaagata ttgtttttat tttctatagc atttttaatt cctcttttgc taaactccca  
9901 agaatctaag ttttgattaa aattgcaaca atctctaaac atctctttta gctcttgcaa  
9961 gcttgaaaga ttccatttat ctaagggctg attaaaagct tttgtctcct caaacatact  
10021 ttccatattc tcaactttgc tcacatccca agattctata ttatgattaa agtgtttagc  
10081 accaaaaaac ataagcttca tacaaccac attcgaagta tcccacaatt caattccgct  
10141 aaaatctttc ctttgtgagt tgtgaaatat cctactcata tctgtgatta agcttgtgtc  
10201 aatatcgccc aatagagtt cttctttttc gcatagcatt tttagatcgt ctgtggtttt  
10261 ggggaagtat ttggcgtttt tgtttgtagc atttgtattt tttgcattta gaaaatcaag  
10321 atgcttttta tcccaaattt caagcatatt ggttgggcag tttttaaaaa tatttgtact  
10381 ttctaataaa actttactgc ttacgctcca cttgcttaaa tcttggcgga aatttatgca  
10441 gttttcaaac ataccgctca tatttactac actacttaca ttccaattgc ttatatcgct  
10501 attaaagttt ttacaaccg caacatatt gtacatatat ttcacgctac ttacatccca  
10561 gctttctatg ccatcaaacc attgtgtctc tttaaaacta gcaaagacaa aaagctcact  
10621 catatctata attaaacttg tatcaatctt tgaagggctt atgttatctg ttagtaattc  
10681 tttcaaaaaac tctttgcatt ttggttgata tatgccttct tcattgcacg atcgatacca  
10741 gcttggatag ttattatttt tctctattcc tgaagacaa aatatgcctt tgagatagct  
10801 tttttcaaaa tcaatttttt ctcccaaga ttctaagttt tgattgaaat ttgttgcgta  
10861 tgcaaacatt ttttcaaaat taccacatt tgaaatatcc catttatcta agctttgatt  
10921 gaaatttggt gcgatgcaa acattttttc aaaattacc acatttgaaa tatcccattt  
10981 atctaagggc tgattaaag cttctgcacc tttaaacata cttccatac tttcaacaca  
11041 agagacattc caagattcta tattgtgggt gaaatgctct gcactttcaa agcaggattg  
11101 catatctgta accttgcttg tatcccaagt ttctataccg ctaaaatccc tgcgtctgct  
11161 atttttaaac aaatctttta aacttttaat tttgcttata tcaatatcgc caagataaat  
11221 ctttttatct ttaatgagtt ttttaagctc ggctttgttt tttggcgat gtatgacgcc  
11281 tgtgcttttt gtagccttaa aaagtgcatt aagcgatttt ttcttatctt ttgcgttggt  
11341 tagttttgaa aggatattga aaagctcata ttcatcacta tctttcacgc ttcgccctgc  
11401 atatactgcc ctatcatccc aatactcttg ctctaaatcg cttagatagg tttcaagatt  
11461 ttctattata tgggggtggga ttttcgcacc tttactaaaa agctctaaaa tcgcactcct  
11521 tttggcgctc cattcactca aaggtgcctt acgcaaagcc tctattgcgt ctaaaagttg  
11581 tgtatctaaa tcttgtgcca taactttttc cttgtttaaa aatttttgta taattttagg  
11641 aattatataa tagatttttt aaatacggca tagaaaaggct tgatgtcttg cagtttgata  
11701 cagagataca agatgagata attactctaa aaaaggcaca aaaattcgct catagctagc  
11761 tttctttctt aattctgcaa ttgtttgaca ttgatactac ccaataagac ctaatatgcc  
11821 catgattttt agaatctact tcattaactg cctcttcgca atttgtgctt taaatttata  
11881 tacctatcta gtttctctaa attaccacc cttaaaaagc cttgcctttc attgttaaat  
11941 gttgggatat ctgctgtatc tatgcttttt gccatattgc ttttatcttt ctgcgtttat  
12001 aattagttct gcttgttctc tttgcatttt tgctcctttc tttgtatata ttttattccc  
12061 atttaagctc taaatcaaag cctaaatctt taatcaaagt ttcaaaatat cttagcctt  
12121 tgttttctct tagccaagca aaaatcgcct cctcatcctc aaaatcacct ttatagccaa  
12181 attcatcagc ccatttgtaa gcattatacc accaatcagc atgcgtatca tttagcacat  
12241 ctttggcata ctcttgcgct tcatcacttg gttttaaatc ccgcatagca tagagaatat  
12301 taaaggcttg ttcattttct ttttagtagct cttctttact aaatttttca ttatctagcg  
12361 ttataccgct tagcacttgc gagagtgcca aaccataata atacgcacct tcctcacaga  
12421 tattatctc tttagcatat ttacttaact cttgtttttc atcaactttg ccatttatat  
12481 ttgccccttg ctctagtgtc tttgtaaaaa gttcaaaatc actagtcata attgctttaa  
12541 acaacatatc atcagcatta ttcatgttta atatttctcc taacatttct tgttttggaa  
12601 gattatgtaa aatgcgtgtg cgatttaata gagcataaag tgcaactgat tcctcattaa

12661 atactaaagt tttatactct atgatttgtg catcagaatc tgtcataaag cttacataga  
12721 cattatnttc acgcctaata cctgcacaca caggctttaa tggctcatta taccaaatga  
12781 atggatattg caaatcctgc aatgactttt ttaaattctc ttcattaatt ccctttcggt  
12841 tgacaccctt ataaagctca atataatntt gcacaagcaa atattgcaaa gcctcatctt  
12901 ctctctcaaa gtctntttca tgctctatac ttgcacgctc acctgttcta aaaacctcat  
12961 atntttgcac actccttatcc caccaaattc ctagcatata ttcgccccaa tgctctnttt  
13021 ttctctcata ccaagagact gaaaaaagct cctcctgctc tatgatttgc cttgctagct  
13081 cttgtgtgat tnttgagtt tntaagtcta actcctnttc taagctaaaa aagccataat  
13141 ttagccctt tgtgagagt ctaaattttg cattactntt agattctaaa aaatcataga  
13201 taaattttgg aaatttaaat tcataatacc cttttgtatt gaataatata gtaagtgtag  
13261 aatcttcttg ctttgtgtaa atattgcaaa atntttctt atnttttagtg aaatgcttat  
13321 catcaaaaac gcttccgctg agccaatcta gctntttaat gactnttatt ttcatacaat  
13381 agcctagata aatcttacta tntttgtcaa aatcaaagta gntnttatcc tccaaaaagt  
13441 cgtggcaaaa agattctgta tcgccgataa aatactgata atgtgctttg tctataaact  
13501 cttgctcttt gtaagagcaa gcataaagcc aaagtgcgcc atcaatcttt tgtgtgtcat  
13561 attcgccaac gatgatttga taagatgttt tattatactt tntatcttgc tcttgcaaga  
13621 tacctataag aaattcaagt gcttcatcgc tntttatgcg aataagtgcc acatcatctc  
13681 tgtaagtatt ataaaactta aagccgacta tattataaga catatcatct atntttctc  
13741 ctgcaattat acctatgcct ctaccgatat tacgcgactc accaagttcg cctaaaagtt  
13801 tgnttgttat ttctgtagtt tntgcaaaaa tgatttgaga aatattgcac cgctctaaaa  
13861 agtctaaaaa tgctnttttg gcttcatcgc aatntttggc attgctaaaa tctcttaaat  
13921 taatctttag cctatattgt gtgctttcta gcttaaaagt tgtatcatct atgcgagaat  
13981 ttagaagata gatagatggg ctaagcccta aaaactctat aataggttct atatctacat  
14041 gcacacttcc tntttctaaa tnttgcacga tcttagctac acgctcatct atatgctt  
14101 tnttatccaa gcttctataa gctaaaaact ctatntttc atctataaaa gcatagataa  
14161 agagttctgc tctaaactca cattcttgaa atnttatgta agagggataa tctnttaaat  
14221 gccttgcct ttcttctacg ccttgtaatt ctttgaggag tnttaaaacc tgctnttaaa  
14281 gtctataggt attgctagaa tgtaaaaaat cttttgtatt ttgtaaggct cttaggttgt  
14341 ttaggacgat tntttctcca ctgctttagt tataggcttt atctnttaaa gatgaaaagt  
14401 tntcattata gntttgcgct aggcntaatt gcatgtattt gtaaataatt tntgcgtttt  
14461 tgatatgttt aatataggat tntttgatct taaccccgct gcataaaagc aaaataaagt  
14521 tntcccaagt aacttgaaag ggcttatcta aaagcataca caaatntaca gaatctctag  
14581 tactaaaggc ttactccca taaaaaagcg tatgaatata catatattca aaaatacttt  
14641 catccacatc atcatcaaaa agccattgaa aggcctctaga ttctaagagg gcttgtnttt  
14701 gctccttgct taaaaaatgt gaagcagtggt tataagcacc gcaaagattt ttaataagag  
14761 aatctaacia atcatcaaga gcgnttaaat gcgnttgta aatctctgta acactnttta  
14821 gntcaaaaat cttnttgatc gcttctnttt cgtcttcttt taaagagcta ggagagcgtg  
14881 ttggctgntt gtgtaaaaag agtattgaaa gcttagaatc ttgcgtgntt gtagattctg  
14941 tgntttctgt cattntaagt ggcgatgaaa aatctntttt agaactntga ttgaaatntt  
15001 ctttagcctt tntgtagcta ttcataggnt ttgcattaca agatagtgct ttactaagta  
15061 gattctgtgc gatttcttct cgctgcatat catttaggct agaacttatt tgcttntaat  
15121 ttaaaagcct aggatacttt ttgccatgct taatcaciaa catttctata tatttctcat  
15181 cgctccatgg ctctnttagc tcatcttgga tntggcttag agcatctatg cgnttgtagt  
15241 tntgatacac acaagcttgc aagattaaat tgatagaact tagcattnta tggcgtggca  
15301 aagattgtat ttgtcttaaa gcctnttcat cgctgatatt tntatctntg tnttgaggc  
15361 gntgatagct taaagaagta taagaatntg ctgattgcat agcaagattt gcaagatctc  
15421 tatctacttt tgcaccgca cttactagat tgattaaata agnttttagtc tcatnaagat  
15481 gtgntttgcc atctnttgnt ggagtgatag agcgattata aaactctctt aatgcaatat  
15541 tntcactatc attagcaatg ggacgcagtg cagagtgaaa tgcaatcacg tntatnttat  
15601 cttnttgct actagcatat tcgcagaaca aaagctcttt taccacctt ataagctctt  
15661 tatttataag ctcttntgat gctnttaact ctttagcgt taatntttga aactcctnta  
15721 gacttagcct acaactctt ctaaaggcct tntgctctag cagtnttgcc ctaagctnta  
15781 gggctntaga tctntgtcta agntcgccta gntnttctag ctcttctntg gtgtaggcat  
15841 aatgcttact catctcttca gccagtnttt gaaaatctc taagctaaat tntaggtntt

15901 ctgctccaaa atttgtagat agcgcaaaag agccaaaagg cgatgaatta gattttatag  
15961 aatcttcttc atcttctaaa tattcttcat catctctatt ataattaagt tctatttctt  
16021 catcatcttc ttctagctct tcataatcct cattaanaatc ataataatcc tcatcatctt  
16081 catacccatc ttctctttcc tcttccaaat ttaactcacc ctttaaaaaat tgctcataga  
16141 gattacaaaa atcgttttct aaaatataac cacacatagg atgtatagaa tcaaaaaataa  
16201 tcgtagtttt gccatcttta tagcaccata cacaaacccc acccatgctg aaaattcgca  
16261 cttcatcgct attttgaatg atttgcatag tataggcgct tttttgtaag aagcttggtg  
16321 tttgcttctc cttttctatc tccacactaa aggggctttt ttgcataatt ttcataaaag  
16381 tatccaaaaa attctcatct gtgttttcta tctcaaaaaa agtaatttta ttttttcat  
16441 agcttgata gtgcattgtg tttccttaa aaaattataa atttatttta aaaggcttct  
16501 tatgaacttg attaattctt aattgaagcc ttagacaatt aaagattggt cttccatttt  
16561 ggcaataagt gcaaaatagc ttctttttgc tctttatttt ctgctttttc tagctttttt  
16621 gtacttcttc taacatatct ttgctaacc ctacaccact ttctattaaa agctcacaca  
16681 tggctgtttt gtgggagatt tgtagtaatg gtttctagta ggagcttttg atcaaagcag  
16741 ttaatataat ctaaactctac accattttta ttaaaacttt agcagattct atatgcccc  
16801 ttttagccgc tattttatct aaatttttaa aagcttcttc aatgtctgta atttgtattt  
16861 ttatttttcta ctcttttttg atcttattta aaaaagccct tgcaaggcca ctttctttag  
16921 aacccaaaaa ctcttttaca agctccttgc catttgcttg tatgtttaga gattctagct  
16981 tgttttgtgg ttctatttgg ctaaagatga taaaagggat ttgtctgcca aacttttgc  
17041 ccataaaacc actattttgg atatagttaa gtgcttgggt tacaagctta aaataatact  
17101 taagatcggg tgtgcggcat tcattccatt cctcttcaaa tcttagcttt tttgcttgaa  
17161 tctcttttat ataaggttct gttattttt gaaaagtgtt atcagtctca tatagatcta  
17221 tggtttctaa tacactatct aggaagtttt catattcca ttttgctttt tgcaagggga  
17281 tttgtttgga ttgtgctacc cttttgctg tagagagagt gttaaatcta agctttaaag  
17341 taaagcaagg ggattttag ttatgattta gcaaaaaggc gtaaatatcg ctaaattctt  
17401 gtgtatcaat atcttcaagc acttggatta aatacaatac ataattttta aagataagat  
17461 aaaaaggatc ttctaaatca ttattttctc tagcctcatc ttctaatctt ttttgtattt  
17521 gtagtgtaag cttgcctttg tgatcattat atacctttat attttttagac ttagcttggt  
17581 catacacttt ttctattaca agattttctg atgccctttc atctaattca taacatgttt  
17641 ttctgccata ttcttcttct ccatagatca ttataggcaa atctatttcc aaaaagagat  
17701 tgcaagatc aagtgggtggc tcaaagtgga tacaaggttt ccctagagcg taatttcggt  
17761 ctttttggtg taaatgcaag gctagaggga aattctcttc ttttggaag tctattttat  
17821 aagcctcatc tccccatgca taacgcataa gattccataa tgcaagggct ttaaaatcca  
17881 tacttgtttt aaaaatatct gtgccatatt ctttactttt ctttgctttt ttacaaagca  
17941 actcaagccc tagtgagatt gcttcaaagt ctttattaat catagcaata tataaggcac  
18001 actcatcttt ataagttttg gagtttgatt ttacattcaa gttgcgctg agttcctcta  
18061 atgctttggt tttatgtgta aatcattat aaaaaatcat cgcgcgtgta agatagaagc  
18121 tacttaata aggtgtgcag ttttgcatat attttaaagg atagacttta gggaaaagtg  
18181 caaagttatt cgcaccagc atctcttccc atttaagctc ccctcttcca aaagagtgtt  
18241 ttatgctctc tgtataaagc acatcatcta aaaattctac attcttttgc gtatagccat  
18301 cttttataat gttatacata gctatgtatc taaagtctat cgtatcacia aatcatatt  
18361 tgcataaacg ctctatttgt tcttttagac ttttgtgttt aagcttacac tcataatctt  
18421 ctaataactc ttgcttatac tgctctatgg agagaatttg atagttttgc ttatctttgc  
18481 aaagctctaa aatctttgct cttttcttac tatctatttt cttttgggtg cttattttt  
18541 ctatataatc caaacttagc tccttataca attttgggtac cccatgggta atattatata  
18601 aaaaaagtta taatttatct tcgaatttat aaataaaaact tgcaataaag aaaaccatgg  
18661 aattaacaaa agaaaaagta aatcactag ggcttgacac taaagaagag gtagtatcc  
18721 cagaggatat taaagtcatt gaaggggaga catttagata caataaaaaac atacgcaag  
18781 cattctaaa tgagggattg gaggtatca aatctagcgc ttttgcttat tgtaaatcct  
18841 tagaagaaat catctttccc acaagcttaa aaacgattga aagaaccgca tttgatgaat  
18901 gctctagcct taaaaatcta aattttaatg agggattgga agttatagaa aattatgctt  
18961 ttagttagtg tgaatcgta gaagagataa ttttgccaga tagtttaaag agtatcggag  
19021 aatatgcatt taaaaaatgc tctagcctta aaaacttaaa atttaaagag ggattagaag  
19081 ttatagaatc tagcgctttt gcttcttgtg aaaccttaga agaaatcatc tttccacaa

19141 gtttaaaaga gattggatat gaggcattta aagaatgctc tagccttaaa agtgtaaaat  
19201 taaatgaggg cttagagatt ataggacatc gtgcctttgg gggttgtaaa tccttagaag  
19261 aggtaatfff gccaaatagt ttaaagtffa tcgaacattg ggtgttttct gattgctcta  
19321 gccttaaaag tgtaaaattg aatgagggat tggaagttat agaaaattat gcttttagtg  
19381 agtggtgaatc gttagaagag ataattttgc cagatagttt aaagagtatc ggagaatag  
19441 catttaaaaa atgctctagc cttaaaaact taaaatttaa agagggatta gaagttatag  
19501 aatctagcgc ttttgcttct tgtgaaacct tagaagaaat catctttccc acaagtttaa  
19561 aagagattgg atatgaggca tttaaagaat gctctagcct taaaagtgta aaattaaatg  
19621 agggccttaga gattatagga catcgtgcct ttgggggttg taaatcctta gaagaggtaa  
19681 ttttgccaaa tagtttaag tttatcgaac attgggtgtt ttctgattgc tctagcctta  
19741 aaagtgtaaa attgaatgag ggattggaag ttatagaaaa ttatgctttt agtgagtgtg  
19801 aatcgttaga agagataatt ttgccagata gtttaaaaga gattagagaa gatgcgtttt  
19861 tggaagtata taatctaaaa cgcattcata tttctaaaaa ccatgaatat tttggctatg  
19921 aaaataatgt gctttatgat aagaaaagca aatttgttat tgctgttgct aatatacaag  
19981 agagtattag tttccagag tgtataaaga aaattgggca tcacaagttt gctggttctt  
20041 ccaccttaga agaaatcatc tttcccacaa gcttaaaaga aattgaaaga tatgcatttg  
20101 aagattgttc tagcattaaa agcttaaaat ttaatgaggg attggaagtt ataaaaaatt  
20161 atgcttttag tgggtgtcaa tctttagaag agataagttt gccagatagt ttaaaagaga  
20221 ttagagaagg tgcgtttttg gaagtgtata atctaaaacg catttatatt tctaaaaacc  
20281 acgagtattt tggctatgaa aataatgtgc tttataataa gaaaaaaagg aagtctgtta  
20341 ttgctattac aaacgcaaat gagggcatta catttccaaa gtatatcacc gcaatcccag  
20401 aagatatttt taaaaatcca aatctttcaa aagtggtttt tgaaaataaa aattacaaaa  
20461 ttagttagga acaatacttt gcagaaaaggc ttcgtgaatc tatacgtgca caccaaaagg  
20521 agtttgcact caataaggct aaaaaagaaa aagtcgctga aattataagt gtgagctttg  
20581 atggtatttt acaagagatt gctaaaaatt atggggtaga atttattata gaatctaaaa  
20641 aatgcaatca ggaaaaaatc gtttgtattt taaaaataga aaaacacaca aagattctaa  
20701 ccacaataaa aatcaaaaat cctcgtttta aagagcaatt tgaaagcttt gtaaagcttg  
20761 tagcagataa agaaagcact tttgaaagtt tgcaagattt cactaaaaag cacaaaaata  
20821 taagctttaa taaagtcttt gctttgcact cttatatccc ttttataaag cttttgcagc  
20881 cagataaaga gtttttatca cttggactag aaaatcttag agtaaaaatc ccacaaggca  
20941 cagaagtaat acccaacaag gcattttata aactaaaatc ttttagctttt gtagagctta  
21001 atgatgattt aaaagagatt gatttgcaag ctttttatgg ttgtaaatca ttaggcgaaa  
21061 ttactctccc aaatagcgtt acaacaattg gttggcaagc ttttaaggaa tctggtatta  
21121 aacaaattaa tctgccagag agtattaaaa aaataagttc ttggattttt gccaatgtga  
21181 attctttgca agttgtttat ggcaaaaaag attctcttgc aaagaaacta gctaaaagtc  
21241 taggtgtaaa atatatagaa atacaagaat aataaaactt tgcaaaagca aaatttaaaa  
21301 aaaggaaaac catgaaccta acagaagaaa aagtaaaatc gctaggactt gatacgaag  
21361 aagaggtagt gatcccaaag gatattaaag tcattgaaaa ggatacattt aaatacaata  
21421 aaaacatacg caaagtcatt ctaaagagg gattagaagt tatagaaaaa tatgctttcc  
21481 gtaattgtga atccttagaa gagataagct tcccaaagat tttaaagagt atcggagaat  
21541 tggcatttag tgagtgtctc agccttaaaa agctaaattt gaatgagggt ttagaaagca  
21601 taggatctcg ggcttttctt ggggtgtgaat ctttagaaga aataagtttg ccagatagtt  
21661 taaaagagat gtgggcaagt gcgtttttga aagtctatac tctaaaacgc attcatattt  
21721 ctaaaaacca taaatatttt ggctatgaaa ataattgtgct ttataataag gaaggcaaat  
21781 ttgttattgc tgttgctaata atacaagaga gtatgagttt tccagagtgt atagaaataa  
21841 ttggatacga ggcattttatc gaatgttcta gtcttaaaaa actgcatttt aatgaaggat  
21901 tagaaattat aggagagaat gccttttata aatgtaaact cttagaagag ataaacttcc  
21961 caacaagctt aaaaacgatt gaaagaactg catttgataa atgctctagc cttaaaagct  
22021 taaaatttaa tgagggattg gaagttatag aaaaacatgc tttccgtaat tgtgaatcct  
22081 tagaagagat aagtttgcca gatagtttaa aagagattgg agagggtgcg tttttaagag  
22141 tttataagct aaaacacatt catattttcta aaaaccacga atatttttagc tatgaaaata  
22201 atatacttta tgataagaaa aagaaatctg ttattgctat tacaacgca agtgatggca  
22261 ttacatttcc agagtatatc aaagcaattc cgcaagatat ttttaaaaat ccaaatcttt  
22321 caaaagtggc ttttgagaat aaaaattata gaattagtga gagagaatgc tattcaaaag



22381 gggttaatga agctataagc gcacatttaa aaggctatat gttcaacaag gctaaaaaag  
22441 aaaaagtagc tgaattatg agtgtgagct ttgaaggcac tttacaagag attgctaaaa  
22501 actatgggggt agaatgcagt atagaaacta aaaaatgcga tcaggaaaaa atcgtttgta  
22561 ttttgcaatt tcaacaacgc acaaagtttc taactacgat aaaaatcaaa aatcctagct  
22621 ttaaagaaga gtttgaaagc tttgtaaagc ttatagtaga taaagaaagc acttttgaaa  
22681 gtttgcaaaa tttcactaaa aagaataaaa atatacgcca tagcagggct tttgcgctaa  
22741 atcattgtat cccttatgtg aaattttcaa aactagagaa agcattttta tcatcaaacc  
22801 taaaagatct tagagtgcaa atcccacaag atgtagaatc tatcccagaa gaggcgcttg  
22861 gaaatattaa accttttagtc tatgttaaga ttagcgaggg cgtagtaagg attgaaaaga  
22921 gcgcctttga gttttgtaac agacttagag aagttgagct tccaagcact cttgcttaca  
22981 taggcaactc tgctttttcc tgctgttatg atttagagca aatcaatatt ccaaatagcg  
23041 ttacacacat aggtgaagaa gcgttttatt gttgcaactc gcttaagaat gtggtattgc  
23101 caaatagcgt tacacacata ggtaaagctg cgtttgaatt ttgcagatcg cttaaagagt  
23161 tggtattgcc aaataagcta aaagagatag aagaaggagt gtttaaatac gctggtttag  
23221 agagtatcac aatccctgca agtgtagaac ctctaaaaaa agctagtaag tctttttatg  
23281 aatgcccttt gaaagtcac tatggcacia aagattctct tgcaaaaaaa gtggctgaag  
23341 aattaaatac acaatatata gaaatacaag aataaaggat attaatggga gtaaaaatca  
23401 atacaacaga gttaaaaaag attttagaaa tcacaccaag tgagcaaaat atcatgctag  
23461 taggcaacaa cggcattgggt aaatctcaaa ttatccaaga gcattttact aaagagggat  
23521 taaaggtcgt tatattattt ttagggcaga tgagtgatcc aggcgatctt atcggcttac  
23581 cgcataaaaa tgaaaaaagc ggacatacgg agtttatccc acccttttgg tttccgcttg  
23641 atgatacgcc aatcgtgctt tttttagatg agcttaatcg tgcaaggcca gagattttac  
23701 aaagcgttat ggacttaaca ctttaataaac gcctagcagg tagatcgctc ccaaagggat  
23761 cgcgtgtgat aagtgcggtg aattttgggt atgaatacca gctaagcgat cttgatccag  
23821 cactcacaag tcgctttaat atttatgaat ttgctccaag catagaagag tggcttttat  
23881 gggctgatgg tgctaagata gattctagaa tcattgattt tattacagaa aatccagagt  
23941 tgcttgacac acaagaagga atagaagatt ttgggcttga taaattcca gatcgtaggg  
24001 cgtgggtgag agtttctagc attattaaag agattgagga tataagcagc gatatttata  
24061 aaaaggcaat ttgtggtatt gtaggcataa gggcgggtgt gaagtttgta gaaacttata  
24121 agggcaataa gcttataagt gcaagcgaga ttttattgca ttttaccaaa gtgcaaaaaa  
24181 agctagataa atacaagatt ctagatttta caaaaatcaa tgactcgcta ttccgctata  
24241 ttgaaaacaa aaactaccaa gagagcgagg ctaaagagat agccaaaaat tttgaacttt  
24301 attttgatta tttacaaaag aaaaaggcaa atgaagtgct agggcatttt accaatcttt  
24361 ttgtaagcca aacttatcct aaagtagcga gttttgtgat gatacact ccaagcttac  
24421 agcaaaaaat cattagcttt gtaagctcat tataaatgaa agcaaaaataa tggatttaaa  
24481 acaaaaatth caaaaaatta tagattcgtg gtttttgagt gagccctttt tgtttgagat  
24541 ttattgcacg catacgctaa aagtttctag cttggaagtc cctatgcgaa gcggtaaagg  
24601 cttaatagaa tatgataaag aattatgcca agatttaagc caaacgcac tagaagagtt  
24661 cttaaagcta gaagtatttc gcatagcact aaaccacccc tatcaaagac agcctattaa  
24721 tgctaatagc gtggcactct atcttgcaag cacgattaca atcactgata attgtagctt  
24781 taatcttaat ttgcctaaac cagagcattt taagttagaa gaaaattgtg cgtttgaagt  
24841 gtattataga aagcttttag agattttacc aaaagaagag agcgaagca ttagtggtga  
24901 tgaggataca gatgaaaaac aagatttaca aggctttgaa tctgcaagtc ctagcgatgg  
24961 cacaaatgag aatcaagata ttgaaaatca agatattcaa gactttgaat ctatgagcct  
25021 tatggattta aatctctctg caattgcaa atcttgacg caaaattggc aagatgatga  
25081 aacgcaagca gaacttatac aatccattgt aaaaaatgct ttgcgtaatg caaaatcatt  
25141 tggcacaatt tctggcgatt ttataggatt attagagctt tctttaaagg ctaagatgga  
25201 ttatcggcgc tatctacgag cctttaggca ttctatcctc tcaagcaaac gccgccttgt  
25261 gagaaataag ccaagtcgct gctatggctt tgcatattht ggtagcactt atgagtttag  
25321 cacaaagcta ttagttgcag tagatgtgag tggatctatt agcgatgaag ctttgcaaaa  
25381 attcttttat atcatcaata gattttttaa atacggcata gaaaggcttg atgtcttgca  
25441 gtttgataca gagataaaag gcgagatgac aactttaaaa aaggcaciaaa aaattgtaaa  
25501 agtgcaaggg cgtgggtggga ctaatthtga gcctgtgata caatattatg aagcacataa  
25561 agaataatgat gggcttatta tcttttagcga tggatatgca cctcctgtaa atgcaaaaga

25621 ttcacgcca aaactttttg tttttgaaaa ttttgagcaa tatagtgatt ttttagaaaa  
25681 tcctttacca aaaggttcca aatgcactta tcttacttaa actacatgtt ttttacattt  
25741 gtttttaaca ctttttgcatt gttactcctt tataccattt tgggtggattt tcttgcattg  
25801 gggaagaata aaacatatat cttatctctt taacattacc catattccat ttttcaatac  
25861 cactaaaatc tcttttatta atctcttcta attcagtaac ttccacactt acttctaaac  
25921 tgataaacat actcaagcct tgccattttt cgctcatagc taacttttct tcttaattct  
25981 gcattagcta gatatacatt ttttaagtatt ttcttgtaa aattactttt tatcatatta  
26041 aaaattttgt aatcattgca atacaaaaaa ttttagatgca gctaaattct gcaaagagtg  
26101 tggaaatagt gatttatacg atccacaagc agaagaaaaa ctagaacaag aaagaagaaa  
26161 acaagaagaa ttaagaagac tagaagaaga gaaaagaaaa atggctcaag aagaaaaaga  
26221 aaaaagactc aaacaaagaa aagaatttat cacaaaacac aaaagcaaaa tcataattag  
26281 catggtgggt ttctttttga tagcttcact aagcatatat cagtattttt atggtggaaa  
26341 atacagcaga gtttatataa gcaaacttga ggaaaaatgc gatgatggag atggttaaagc  
26401 ttgttttgct agtatctttg taagcgggta ttttaataaaa gtagaaatcg atggacagtg  
26461 gagcttctta gatgaaaacg gggaaattat agcaaagcct gaatttgata gtgtttcgac  
26521 ctttagcgaa gaattgggta acgtttgggt aaatggaaaa tggggttttg tagataaaag  
26581 tggagaattt gcaattaagc ctaaatttga tgatgcttgg agcttttagag aagggttagc  
26641 gaaagttaag ttaaatggaa aatggggttt tatagataaa agtggagaat ttatagcaaa  
26701 gcctgaattt gatgatgttg gggattttag cgaaggattg gtagcagttg agttaaatgg  
26761 aaaatacggg tttatagata aaagtggaga atttgcaatc aagcctgaat ttaattatgc  
26821 tggggttttt agcgaaggat tagcaccagc tttgttaaat gaaaaatggg gttttataga  
26881 taaaagtgga gaatttgcaa tcaagcctga atttgatgat gcttggagct ttagagaagg  
26941 attggcaaga gttaagttaa atagaaaata cggttttata gataaaagtg gagaatttgc  
27001 aatcatgcct gaatttggtg gggtttggga ttttagcgaa ggattggcga aagtttgggt  
27061 aatggaaaa tggggtttta tagataaaag tggaaaaatt gcaatcaagc ctgaatttga  
27121 tgatgttggg gatttttagt aaggattggc aagagtttgg ttaaatagaa aatacggttt  
27181 tatagataaa agtggagaat ttgcaatcaa gcctgaattt gatgatgtt gggattttaa  
27241 aaaaggatta gcaaaagtgt agttaaattg aaaatatggt tttatagata aaagtggaaa  
27301 aattgtaatc gagcctaaat ttgattatat agtctattaa atctctatta tctccacctt  
27361 atcttctaaa acatagacta aaaaagcttg agttgatttc ttagccaaga tcttctcgat  
27421 ctcaagcttt gccatttttc gctcatagct agctttcttt ctttaattctg cattagctag  
27481 atatacattt ttaagtattt tcttgttaga attacttttt atcatattaa aaattttgta  
27541 atcattgcaa tacaanaaat ttagatgcag ctaaattctg caaagagtgt ggaaatagtg  
27601 atttatacga tccacaagca gaagaaaaac tagaacaaga aagaagaaaa caagaagaat  
27661 taagaagaaa acaagaagaa ttaagaagac tagaagagga gaaaagaaaa atggctcaag  
27721 aagaaaaaga aaaaagactc aaacaaagaa aagaatttat cacaaaacac aaaagcaaaa  
27781 tcataattag catggtgggt ttctttttga tagcttcact aagcatatat cagtattttt  
27841 atggtggaaa atacagcaaa gtttatataa gcaaacttga agaaaaatgc cactacgatg  
27901 atgaaaatag ctgtaaaatg ctccaaacca tctataaaga aaaatgcat gatggagatg  
27961 gtaaagcttg ttttgctagt atctttgtaa gcggtgattt aataaaaagta aaaatcgatg  
28021 gacagtggag cttcttagat gaaaacgggg aatttatagc aaagcctgaa tttgatggtg  
28081 tttcgacctt tagcgaagga ttggcaagag ttgggttaa tggaaaaatt ggttttatag  
28141 ataaaagtgg aaaaattgta atcaagcctg aatttgataa tgttggggat ttttagagaag  
28201 gggtggcacc agctttgtta aatggaaaaa ttggttttat agataaaagt ggaaaaatca  
28261 tagcaaagcc tgaatttgat gatatttggg gcttttagtga gggattggca gcggttaagt  
28321 taaatggaaa atggggtttt atagataaaa gtgggaaatt tgcaatcgag cctaaatttg  
28381 atagtgggta gtattttagt gaaggattag cagcagttga gttaaatgga aaaattgggt  
28441 ttatagataa aagtggggaa tttatagcaa agcctgaatt tgatgatatt tggggcttta  
28501 gtgagggatt ggcagcagtt aagctaaatg gaaaatgggg ttttatagat aaaagtggag  
28561 aatttgcaat caagcctgaa tttgattatg tttgggattt tagagaagga ttagcagcag  
28621 ttaagctaaa tggaaaatgg ggttttatag ataaaagtgg aaaaatcata gcaaagcctg  
28681 aatttgatga tgttgaggat ttttagcgaa gatttagcgaa agttgagtta aatggaaaat  
28741 atggttttat agataaaagt ggaaaaatta tagcaaagcc tgaatttgat aagatttggg  
28801 attttagaga agaattagca gcagttaagc taaatggaaa atggggtttt atagataaaa

28861 gtggaaaaat catagcaaag cctgaatttg ataatgttgg ggTTTTtagt gaaggattgg  
28921 cagcagttga attaaatgga aaatgggggt ttatagataa aagtggaaaa atcatagcaa  
28981 agcctgaatt tgatgatggt tggaaatttta gtgaaggatt agcagcagtt aagctaaatg  
29041 gaaaatgggg ttttatagat aaaagtggaa aaatcatagc aaagcctgaa tttgatgatg  
29101 ttgaggattt tagcgaagga ttagcgaag ttgagttaaa tggaaaatgg ggttttatag  
29161 ataaaagtgg agaatttgca atcaagcctg aatttgataa tgttgagat tttagtgaag  
29221 gattagcggg ggttgagtta aatagaaaa ggggttttat agataaaagt ggggaattta  
29281 tagcaaagcc tgaatttgat gatgtttggg attttaaaaa aggattagca aaagttgagt  
29341 taaatggaaa atatggtttt atagataaaa gtggaaaaat tgtaatcgag cctaaatttg  
29401 atgatataga ctattaaatc tctattatct ccacctatc ttctaaaaca tagactaaaa  
29461 aagcttgagt tgatttctta gccaaagatct tctcgatagc ttctttataa agcaaaacct  
29521 gctctttgtg tttgttgaaa ttcaaacctg ttttataatc tataatgatg gcttcatctt  
29581 cacccaaagc aagtaaatca agctgtttga tctcaccttg aaaactcaa gcttgctctt  
29641 tgagtaattt tttattttcg atgagttttt gaaattgggc attagcaagt aaatttttta  
29701 tccttttaaa aagcttttca aaatcatcgt gatttaaaaa atgtctaaat ttaccactca  
29761 ctttctgaca aagaatgtca aaattttctc cttgtggaag ctttaaattc tgcataaaaa  
29821 agtghaaagc atttccaaaa taaatttcat ccgagcttgt attttctttt ctttctatat  
29881 cctghaaagg aattttttca aattccatta aggcttgaaa gctttctttt tgaggtaagt  
29941 gggtgtcatt ggtttgaatt tctatctcgc ctaattcttg aatttcaata tcaagcatag  
30001 tgtttaaata gcttgatag ttgccatttt gaaatgaagc atttcttttg atgatgataa  
30061 gactgtcttt tgcccttgta aaagcaacat aaagcttatt gatatcatct tcataatctg  
30121 cttttgtgat tttatctata aaagctttat attcgctctc ttgagtcgct tttcggtagc  
30181 tatcttttat gtgaagctcc caaccttgat cgatatcgta ctcaagcatt atggttttat  
30241 tgttgggatt gttttttgaa aggctatcaa gtaaaatcac atgatcaaat tccaagccct  
30301 tggatttgtg cacagtcatg atatttacac ctctattttg ctctactata atttttaaag  
30361 tgcaaggctc aaacaaaagc tttaaaaaat catccttgct ttttagcgtat tctataaact  
30421 gaatcaaagc catatcatta agatcaagtt ttaattcttt gatcaaataa agcacatttt  
30481 gcacagcact ttttgccaaa tcaagcttta atttcaaagg ctcaaagcct aacatttctt  
30541 tcaaaaaatg caagtaaaat tcgctgccaa aaatgcagta ttttagcgtat tctaaaagca  
30601 ctcttacgca ggctttattt tcgagtaaaa tattactttg agtaaaggct gggatatctt  
30661 gctcgtgtaa aaaatccaaa atcatatccg catcgttatt tttccagcac aaaatgcaaa  
30721 tatcatcata agcgatattt ttacttttta aaaatttaag ctgctctagc aaagcttcta  
30781 gggttttatc ttgaatttct ttagcttgat ctttatccac ctttatttct tgcgactcga  
30841 tcacacgcac aaagccacct tttttgcttt ctaaagaaag ttgaggggtg tagtctttaa  
30901 tcttactttg aaaggtttta ttgacaaaat caacaaaat ttgtttagag cggtaattga  
30961 tcgtgagttg atctttttga atttgtttaa attcagtttg caacaaatca aaaagttctt  
31021 ttttaccctt tctaaaacga tagatacttt gttttttatc gccacataa aaaaaggttc  
31081 tatttttctt cacgccctcg cccgaaacaa gctcggcgat caaaggctt aaaatttgat  
31141 actgcacgac gctagtatct tgaaattcat cgattaataa atgagaaata tagccatcca  
31201 agcghaaata aatcatatct ttaaaatcac ttctgataag atctaaccac cttcggtcaa  
31261 tatcgctaaa gcttaaaata tttttatctt tttggataat atcttttagcc ttgctaaaat  
31321 ggcttaaaag attcattaaa tttgcatct tatattcttc aagctcttta gcataagcat  
31381 ttaaagcttt gatgaatgct tttctttttt ggctaaattg ggcatcgtg tcttctaagt  
31441 cttgcaggta ttttgagca cctgttaaat tcaaaagatc tgactttgca aattggctta  
31501 attgaagcac ttcatcttta aaatgcgtgc ataaatattt atatcctttg acatgatcta  
31561 agctcaaca ataaaccctt agttcatcat aggcttgatt gatagaagct tttgaaggat  
31621 taggaatcct tacacattct ttaaaatagc cattttcata gaatttctca agctcttcaa  
31681 aaaaatcatg attatcttct aaactcactt tataataagc caaatctttt aattcttgac  
31741 gattgagtaa ttttaaaaa acagccctaa catcaagctt ttcttactt gtatcaaaat  
31801 cgctactcaa tcccaattt aaagcaaaag ctcttaaaat tcgactaaaa aaagaatcaa  
31861 atgtacctat cttaagcact tgtcttaaaa atcttgctt tttcttatct cttaaaagta  
31921 tcagctcatc ttcttcgcac cctaaaagct cacaaagctc ttacattcg cttttttac  
31981 tttctttttc caaatttaaa aaagtatcaa taatcctttt ttgcatttca ttggcagctt  
32041 ttttggtaaa agtttaggct agaatttcat ttatttttgc tccttgtaaa ataagagcca

32101 caaaacgcac acttaaagca aaagttttac cgcttcctgc gcttgcttct aaggctaaaa  
32161 aaggcttaaa tttcatctaa aatccttttt gtagatgatt ttataagggc aatactcatc  
32221 tttatcgttt tcaaattcaa tctcttcttc tctttgctca agcaaatctt ttagacattc  
32281 ttttaagctca tctaagcttt tagccttttc ttcaataaat tgcatttgat ttaaatcata  
32341 aaattttgct tctgcatttt catcgtataa agccttataa aaagctagct gaaaggattt  
32401 gctagggact tttccgcttt tataatcaat gataaaatgt ttatcctcaa gcttatcgat  
32461 acgatcaaca atacctttaa gcctgatcgt atgattttgg atatttaaag ctttatgatg  
32521 ttcctcttct tgctcaatca ccctatagcc taatttataa tgctcttctt cgtttttggc  
32581 aaattgtata aattttaatt taaaaatttc aagctcaagt tcgctaatgc cgtatttttg  
32641 atattcttgc tctaacaat cattgaaaa ttgtaggttg aaattatttt tagaataatt  
32701 cttataataa agttcgagca ttttatggat aaaatttctt tgattttttag ccctgctttc  
32761 atcgcttaag gctctagctt caggtaattc taaaatataa cgataaaaaat aagttctttt  
32821 ttgatataaa aataaattca aacgactaaa cgataattct ttttcaaaaa tatcgtgttt  
32881 taaaacaggt gcttttatag gattttaaatt taatcttaca ccttgatagt cgagttttta  
32941 agcatttaaa taggccttag aaggtgtggg tttttcttca aaaaaattaa aatcaagctc  
33001 atctaaaaaa cgcgacctgg tttgctcttc attctccaca aaactaatgc taagtttttt  
33061 agcatttctc atcaaatttt cataataaag tctttgtaaa ttctctcttc tttcatagct  
33121 tataagccct gcttttttac gcacttcatt gtttaaaaaac aactcattaa tacttctttt  
33181 aggaacaaaa tcttcattaa aatcaagtat gataacacca tcaaaactaa gtcccctgct  
33241 ttctaaaagt ccataacag taacttttcc accaccaaca tgacttaatc ttatttgatc  
33301 taattgcatg aaaaaagtt gcagtgattc ttttaagcttt aaggatttgt ttttgagcaa  
33361 atcttttata aaataaagct ctttttgcac caagttcata agctcctgac tttcatcttt  
33421 taaaaaacta tggattaaat tttcaaaata ctgcaaatca caaatttgat caaagcgggc  
33481 tctaaaatct tcaaattgaa gttctaaata atgcaacaaa gtattatgat aatcaaaaat  
33541 gcttttttct tgctcaaaat aattctcatc tgccttatag ataaaagcat ctgaatttgc  
33601 tccattatat aaggctttga tcttttgata aaacaaactt tctttaatgc ttactccact  
33661 agcaaaattt aacatattgt ttttatcaaa aagttttaa agctcacaaa aactttcatc  
33721 aggagtgata acagctatct tttcaggatc tattcccgtc cggacaaaat tagaaatttc  
33781 atccataaca aaagcacact gcaaagatct aagctcgaag gcttttaatt taactaaaat  
33841 gtcaggatgt gaaagttttt cttgttttaa aatctttttt tgtgaaagat tgacttcata  
33901 aaacatatca agttctaagt gtatatcttt taaaaagtca agttctaata ggtattcaag  
33961 attaaattta ctagttttta agcctatgat tgtatctttg attttagaaa tctcacacag  
34021 caaatcctct tcaaatttac ttaaaaaacc ttgcaagtca taatatatac tttcatattc  
34081 atttaaaaaa tccaaattaa gcttatagtc tttagctaaa gacaaatcat cgtataaatt  
34141 gtgttgctta agcaaaagaa gataatttgt ataaacctcg tctaaaattt ccaaatgctc  
34201 attgtagggt gcataataat cattgttttt aagatcttgt atgctttttt tctctgagct  
34261 taattcttta aaaaaggaaa aaagatattc attgtttttt aaaaaattaa aaaattcagc  
34321 tgaataacct aatttttttt ctaaactctt actttttaa caagcttctt gcattaaaag  
34381 caaactctca taagagcttg ctttgaaaaa attgactaca catactcgat ctaaaaaatc  
34441 tgatacaaga aaagcagaat caagtaaagc gtttttagcc tttgcttttt cttgatattc  
34501 tttaatcttt cttgaggaac taaatattct tagtatcatt gagcgtttta ctcataacta  
34561 aaaaagccta tgatttcatc ttctgtgctg agtttgattt ttaattgcca tctacctttt  
34621 tcaagctgag gcaaagacac acttaagact ccatcttgaa tttgtcctaa aagtttttga  
34681 tcaaattctc ttgtatgagg tcttgtaagc aaaatttgcg tctttaaatt ttgtgtattt  
34741 gctttatcac ttaaagttgt ttttttaaat tttgccaat aagaatctgc atcgattgta  
34801 taacttgcaa tttttctttt accgattaaa tcaactttat cttttgaaa ttcaatctta  
34861 aacaaggcat caaattgctc ttgttgtttt tggataacat taaaattggt ttcaacattt  
34921 tgataagagt caaaataaaa atcatcctca tatacaggat aattgcttgc taccacaata  
34981 gttgctatac aagcaaccac aatagcaaaa atcgaattaa aaattccata aggccaaaag  
35041 gtttttttgc ttttaagcat ttttcttctt tttcattctt ctttgggcgt agtataacaa  
35101 tgcaaagcaa ataaaaccat agattaaaat tcttaaaata ttaatagtat cacggtttgc  
35161 attacctata gaatgctgca attcaatccc tctagcttgc gctaaacgat caactatctc  
35221 tccataacca tttaaaatag ccgcattata aatatcacc ttattggtcg ctaaaaatagg  
35281 caaaatagaa cctgtccctg gataaggact gagtatggct tctttatcga ttaaagctaa

35341 agctccttta gaacctatga tgtctacttt atgtgaatth ttagataaaa caagtaaaac  
35401 ataagactgt gggagttgct tgtgtaagtc tagtaaagtt tgaaaatcac tcttatcgcc  
35461 gattgccaca ccggcaaaaa ttccgctttt ttcctgaagc tctttaccga taagattaat  
35521 ttcattctact actttttggg taagtacatt ttcattaaaa accacaggct caagtgcaag  
35581 aatttgcaaca ggtaaaaaaga ataaaaagat ggccaaaaag ccatcttgta atatthttct  
35641 catcctatgt gaagatgggt tgcggttaaa accgaccatg cagtaatcgc agcagtcaca  
35701 actaatccaa taacaattaa atattctaaa gctttattca ttgtgctact cctcctatgc  
35761 ttttatgatc ttgttctttt gagccaagca tttttacatt ttggatatct ttgaggctat  
35821 agggttggtg cattacttct tgttgagcct taagacccca aatagttaaa cccactaaaa  
35881 ttgcgagcaa taaaacagta gcaatcaaca tacctgtaac acctgaaaga gaaaatacgc  
35941 atctattagt gttttccatt attcaccctt tgaaagagaa attacatatt caccaacagc  
36001 ttctttttga gtatcattca atatagaaaa tgctggcata gctccgataa agccagtttt  
36061 accactatgt aaaacatcta caacaaatgc tgctgaaccg tattttgtaa gatcagggaa  
36121 aattccatct tgaccttttc catcttcacc atgacaagct gcacaagttg cataagcttc  
36181 ttttcctttg gcaactaaat tttcattaga agtttttttg atagcagaaa gctcttttgc  
36241 cacataagca gcaattgcag gaatgtcttc ttcagaaatt cccaaatccg cagcagcagg  
36301 cttttctcca cctgggaaat tcataccttt tgcaccgtgt ttaatcgcct ctactaagcc  
36361 ttcttacta ccccaaatat ttaaattttg agctttttcca ttgataccat cgcctgtaat  
36421 tccatgacaa gcagaacatt gaaccaaaaa gatattttgt cccatagcta tcttatcttc  
36481 agtagataag ttttggatt tctcttcaaa ttttagcatta taagtcttaa cttcttcatt  
36541 atactcacct atacttgagt aagaatttag aggataacc cataaaaaat accaaatcgc  
36601 ccatactatg gtaagaaaga atacaacagc ccagcctgtt ggaatagcat ttttatactc  
36661 tcctatgtca tcccagctat gctcacttaa ttccccttca cttttttttt ctttcatata  
36721 tttaaacatt ctaccaacga ctacaagagt aatcaatata ataagaatcg ctccaatgaa  
36781 agataataaa ttaacattat cttgcaaatt taaccattgc atcaagcact ctttttactt  
36841 tctaaaacac tatcatcgat atcatcgtc aaagcgagat ttgatattt ttcataatth  
36901 ctctcgcctt tttttctgc cctataaaga tgataccaat aagaatacaa tactattgat  
36961 aaaaacatta caaatagaaa aatccataa cttgaaaaa tttcccattc atgtttttgc  
37021 actgctgata aattcaaagt gaccaaattt ttaatcacat tccaaataat cgctaaatgt  
37081 tccatatttt tacttttaagc ttttttaata agcgatcaag gcaacaattt ctttaatctc  
37141 gcccctagca aaagcatctt tcacttcttg atttttcatt tgatcaacta tagcttgtgc  
37201 ttcagctttt atttcagctt gcgcttcttc ccaagtacct aactttgttc cattttcagt  
37261 atcataagga acattaaata cttttttaac agttaaagct tctgcataag cagtttccat  
37321 atcagcattg tttttaaaca tatgcttata agcaggcatg atagaatttg gaacaactga  
37381 aacaggatcc cacatattgt tttcatgcca atctgtagtt ctataatth caacacgcct  
37441 taaatcagga cctgttcttt ttgaaccca aaggaaaggt ctatcataag caaattcacc  
37501 actaacagaa tacataccat aacgatcggg ttcagattta aaaggacgaa taagctgtga  
37561 atgacaagca ttacagctat ctttgatata aatttggcgt cctgcaagct gtaaaaccgt  
37621 ataaggctt tttccttcta taggtcttgc attttctgca aaatttggca gcacttcaat  
37681 aatccccgca taagcaatca caataaaaa acgacagca aaaaagaatg gatttttttc  
37741 taaccaacta aacattttct ctccttttta tgcagccata ggcgaaagcgc tttttggctc  
37801 tttatcaagc acttttccac aagcaattga tttataaata ttataagtaa acatgaaaaa  
37861 tcctataaga tataataaac caccaattgc cctaatacaa taataaggta taatagctac  
37921 aacagtgctc ataaagctgt aaagcaagtt gccgtattca tctgtagctc tccacatcat  
37981 accttgagt atacctgcta tccacataga agcaaaaata agcactatac ctgtagtttg  
38041 aatccaaaat tgtgcttcca ttaaggattt gctataaagc tctcttctaa atattctagg  
38101 agtcatatga taaagcgtg ccatagtcct aaagccaacc caacctaaag ttccatcatg  
38161 aacgtgtcct ggaatccaat ctgtaaagtg agctagagcg tttactgatt tgatcgaag  
38221 aattggacct tcaagtgttg agaacatata gaaagttgat gctaaaatca taaatttaat  
38281 caaaggactt tgcggaagct gacccattc acccttcata gtaagtaaga tattgattgc  
38341 tgaaccccaa gaaggcaaga taagtacgat agagaaaact gaacccatag tttgcatcca  
38401 atcaggaacg gtagaataaa tcaagtgggt tccaccgcc caagataaaa caaacattaa  
38461 accccaaaac gcaataaag aaagtttata agagaaaatc ggctgaccgc tttcttttgg  
38521 taagaaataa taaatttgag caataatacc aacagtaaat acaaaagcaa ccgcatgtg

38581 cccataccac cattgaacta aagcatcatt tgtccctgca tacatagata cactatgcca  
38641 ccatttacc atttctgcaa cgaagtaagt tggaaccgcc atattgttga aaagataaag  
38701 catagcgata ctaaaaaatg tagctatgta ataccaaaga gagatataaa gagttttttc  
38761 acggcgaatg ccgataagcc caaaaatgct tacaccccat aaaacccaaa taagcacaac  
38821 aagaatatct aaaggccatt caagtccagc atattcttta gaggtgctaa caccgcgaaa  
38881 taaagagatt acagctataa tcatgggtgat catataaagc caaaaatgaa gcttgccat  
38941 agccattaga aatttgatt cggccatact cactttaaga acacgctgtc ctatataata  
39001 ccaagttgcc caaatccctg aaagcataaa accaaaaatc acaccagaag tatgaagcgg  
39061 tctaagcctt gaaaaagtag catattcgcc tgctaaataa tttaggttag gatatgccat  
39121 ttgaaaagct ataagagttc ctatagccat acctataatc ccgaacaata tagtcgcaaa  
39181 catgaaatat tttgcaaccg tatagtcgta atttaatgca ttacctgggt gcatcgactt  
39241 tctccttaaa atttttaaga taacaagttt atattataaa ctattaatta tacatTTTTT  
39301 cttaaagcca atatTTTTgt taatcatttg tttttttta tttttaagg aaatTTTTgt  
39361 tcctaatttt ctatattgat tttatacccc aaacctggaa ctttttaat aaatTTTTcc  
39421 ccgactttat ctcttactct ttttataaag gttctaacag cagtatcgct aacatgctcg  
39481 cctatccaaa catttttctt aatatcttca tgcaatacca aaacccagg ctgctttaa  
39541 agcaatgaaa taaaagcgag ttcttttttg gttaaaacta tttcttttcc tttataaatt  
39601 agcgttcttt tggttttatt gaattgatat tctttagaaa tatcaacaag agcattagct  
39661 tctatctttt cacctactaa ataatccaaa actttgaaaa gttcatctat atccacaggt  
39721 ttgattagat atttatctat acctatatca atagagcgca acaatctttc ttttccgaa  
39781 aaagcactaa gcactactat aggaacatca tttgctattt ctttaatttc ctttgacata  
39841 tcaagtccat ccatgatagg catagcaata tctgtaataa tcaaatcagg cttaaatttt  
39901 ttaaatttct ttaaaccctc atcaccattt tgtgcgctta ttaccttact ataacgagaa  
39961 gataaaacat taacaagtga ttctctaate tttacctcat cttctacaac caatataacc  
40021 aattctttca taaatttaat tcccctcttg caactttaa tatatttcaa agcaagctcc  
40081 atcttttata tttttgactt gaatTTTTcc accaaaactc tctacaattt gcttgctgat  
40141 ataaagcccc gctcctatac cttgactagg atgttttagtt gtaatatagg gttgaaaaat  
40201 tttatctaaa atatTTTcat caaccccgcc tgcattgtcc ctaaccttaa ctttaatata  
40261 atTTTTccg aatttcgaaa aactaaatat aatTTTTTT actTTTTgag ttttaaacgc  
40321 ctctatggaa tttataatta aatTTTaaaa aactctcatt aggccattct catgtgctac  
40381 aactctataa tctgTTTTtg agattattcg agtgTTaact tgttgctttt ctatggTTTT  
40441 aaaagcaatt ccaattactt ttttTaaat ttctctcaa gagacatgat ttttttctt  
40501 ttcatgtttt ttaaataagg ttctTaaat atcaattgtt tctgacatat tttttatcgt  
40561 acttttagat tgtagataaa tttcagTaa acccttctca tcttgaacat tttgcttcat  
40621 ttgaaacata gcaataccaa gctcatttag aggttTgtct cactgatgtg caatatcgct  
40681 aatcatctgc tctatagaag aatTTTaaat ttctttataa atctTTTTtg tatctttctc  
40741 atTTTTtct aaagcaactt taagcttata ctcaaaatct ttgcttagtt ttgcaaattc  
40801 ttcttgTgc tctttagcta tcttttcaag atttacacta atttcacgca atttcgcag  
40861 atttaataca agttcttcat ttaattTaa agaattgcta atatcgtaag ataaagcagc  
40921 aatttcattt aaattaccct ttttatccac aataggaatt aaaaatgcgt caagataaaa  
40981 agttttacct agtttatcaa tttttTaa aaccaccaa taagcttctt tttgccaag  
41041 cttttccaaa agctgattta tataatctt tttaacatca ggatgcttta aaataaaatg  
41101 gtgctttcca atcaactctt ttttactata gccacttacc ttgcaaaatt tttcattTgc  
41161 atcgataatt atgccttgta aatcaatttt aaaaaaatt atattttctt ctattgcttt  
41221 taaaactTgc tcggcagctg aatttgccat ttaaaaagcc ttaaagcca tataagctaa  
41281 acctactcca taagcaacaa taatgaaata agatacataa ttaaactt tttcaaaaa  
41341 tacacccaaa tattgcgata ttttaacaaa aaaaagcatc gctggaaggg ttgaaagacc  
41401 aaaaactaac ataactaaaa tgctttctgt aacattttgt ctactcattg cattggctag  
41461 aaaaaaatac accaaaccac agggaacaaa ccatttagca aaacataaaa tcattgcca  
41521 ttttacacct ttaaacccta tagatTTTT aataatcttt tttataaaat actcaaaaa  
41581 agtgcgattt tcgataaaag caaggatttt acctctaaaa attaaagaca aacctaaat  
41641 taccataaac acaccgagta taaaaagga taaactttga attttgcat ttatagctaa  
41701 taaattcca aatatccaa agattattcc taataaaata taagaaaaa ttctaaata  
41761 ttgataaata aaagtttaata aaaacaaatt tttgtgggtc gaatttaaat tcataaaagc

41821 taaaataaat cccccacaca tagaatagca gtgccc aaag ctcgataaaa aggctacgct  
41881 aatatagcc aaaaagtcaa aattcaaagg aagaaagtcc acattaaatt cataaattct  
41941 ttaaaaatat atttactttc gtgtgggcct gacgaacttt caggatgggtg ctgtactgaa  
42001 ataataggat aatctttgta ttttacacc tcaacattat ctccaaaaag atttctatgc  
42061 gtaataatcg ctacctcaca aagctcttca gggacattat agttatgatt ttgagcagtg  
42121 atttcaacgc ttttattttc taaattgatc acaggatgat tagctccgtg ttgtccaaat  
42181 ttcattttat aagtttcata accaaaagcg ttgcttaaaa gctgatgcc taagcaaatt  
42241 ccaagcatag gaattttagc ctcggctaata tttttaattt cagtaatctc ttgttttaaa  
42301 atttttggct ctctgggtcc atttgaaaga aatacacctt gaatttgacc tttttgataa  
42361 agcttgataa gttcttctgc cttgggatca taaggaaaaa cttctacctc taagcccact  
42421 tctacaagct cattaaggat atttgctttc acaccataat caataacagc aacttttttt  
42481 gtattttttt tagccttggt gtaactttga gtagtattat tccaaactcc atgtttgtga  
42541 acgtaggatt ttttagtgct tacttctttt acaaaattga tctcatctat ttttgcatat  
42601 ttttctaaag cagcttttaa ttcttctttg ttagagattt cagttgagat aaccgctctt  
42661 aaatttccgc tgtctcttag catttttact aaataacgag tatctagtcc ataaactctt  
42721 atttttccat gctcttctaa atattcttgt agactttttt gagcgcggaa gtttgaaaaa  
42781 gtaggactta attctctcat taaaacgcca cttgcaaaaa tttctttact ttcattgtca  
42841 ttttcattgg ttctacaat gccaatttca ggcatagaaa aatgataaaa ttgtcctgcg  
42901 tatgaaggat cagatattat ctcttgataa cccgttaaag aggtattaaa tacaagctca  
42961 ccgaaaaaag ttccaccctt gccaaaagcc ttagcagtta aaaaaatata gttttctata  
43021 taaatataag ctttcataat ttaaaacatt cttttttttc taagctcttc ttggtaaagt  
43081 ttttcaaaaa taagctcata ctctcgccta cctggaacag gttttgtttt ataattactt  
43141 attttttcat aaacttcatc ttctaatttt tcataaattt taagatagtc atctatacta  
43201 gaaaaaatca aattttttac tctattttca cttaccacia agttaatata atcattttct  
43261 ataagttctt ctaaaattct atgtgctaaa tgattatgtc tatcttcgga atttaaaatc  
43321 aactaaatt caggggctaa ttttttctta acaagccaaa acatattctt acgatctact  
43381 tgcataagct ccatttcatc ttcttgttgt tccaaaagct ctttaactct tcatctagc  
43441 tttctttcat tcataagatc atcttctaaa atttgtttaa tgcaagggtt taatttttct  
43501 atattgtctt taatttcaac aaaagaggaa tgtgcaatgt ctaacattat tttatttgta  
43561 atataaggta tatgtggcaa ttttatacgc attttcaagc cttttcacta ataattttga  
43621 aataataata ttttttgggt aaaagaatgt taaaaaaata aatttttaat tgcttttatt  
43681 attatccata tttttcagca ataaggtaa ttactcgcct tttgcaggat ccattttaga  
43741 aagcactcct gaaatttttc tagactctaa agatagcatg attttactcg cttctcagc  
43801 gtccatttga gttaaaacat cagctattgc agtatctttc atttgcgaat aaatttcttt  
43861 gatcctacct tctgtttttt cattgataga atttaaaatt tttgttgct cttctaaaag  
43921 ttttgatttt tgctctttta aactctcaat ctgcgcaaaa gtcgcattta cttcagcctc  
43981 tcttgatttt aagacttcaa gcctttcttt ttgcaaagct tcaaaagaag ctttgtaagc  
44041 ttccaaagct tgccttgctt cgtcaaattc tcttgtttga agttcaagtt gtgcctttct  
44101 agcttcaaaa tattgtctac aatcttgctc agcccccaa gctaaattta taaaaaagc  
44161 caagaataaa agttttttat acattttttt ctctttttaa aaaacgagtg atagcaattt  
44221 catctaaaat ttttcttcg attttagcaa gctctttttg cttttgtttg atttcttcgg  
44281 cttctaaaac ttttattttt tcataatcta aatgggcttt ttgatataaa aactggtagt  
44341 gatttatctc ttttttggat aactcaacct tttcttttagc ctttgctaaa gcatctctac  
44401 ccacttgagc catagttaaa tttgatctta atcttgcaat agagcccgag ctaggtaaaa  
44461 cagataagct ttcacattct ttacgcgaaa gctcgtaaag cttttcattt tcaatctgtc  
44521 tttgctttgc tgcattaaga ttgctttgtg ctttatcaag ctgttgtttt cttacttttg  
44581 caacgctatt gtatttactt ttcataaaat gatagtatca tctctttcag gacttgttga  
44641 aatgtatttt attttcacac cacaaagttc ttccaatctt gcgatataat ttttagcatt  
44701 ttcaggcaat aatcataat cttttatacc aaaaacctta tccatccat ccatttcttc  
44761 ataaatagc ttaacatttt ctaaactact tggaaataaa tcaattcca tgcccttata  
44821 ttcataagca cggcaaatth tcaccttttc aaaacctctt aaaacatcaa gtttcattaa  
44881 agataaagca tctaagccgt ttagtcttgc agtatatttt accgcaatag catcaaacca  
44941 accacagcgt cttttgcgtc ctgtgcttac gcctattttt ttgcctattt gagctatttt  
45001 ttctccactt tcacccttat cttcagtagg aaaagctcca ttccccacgc gcgtggtata

45061 agcttttact atacctatga tagaaccac ttcttttagga tttaggccaa gacctgttag  
45121 agcaccgct gaaattgtac ttgaacttgt tacataagga taagttccat gatctatc  
45181 aagcatagag cttgtgctc cttctaaaag cactttttta tcttcatcca aagctttcca  
45241 aagcattctt gtagtatctg ttataaatgg ggttaaaatc tcaactgaagc gttttaaatc  
45301 actaagcaat tcatctgaat ttggaatttc aatccctaaa aattctaaat aatttttatt  
45361 tgcttcaaaa tctttcatta aagcattgtg aagtctttga ggatctaaaa gttctcctac  
45421 tctatgtccg gtacgattaa tcttatctgc ataagaaggt cctatacctt tgcctgtcgt  
45481 gcctatagca tccttacctt tgagtttttc tttggcaata tctatcaaag aatgggtgtt  
45541 taaattttaa tgtgctctat cgctaataa caatctacct tttaaatttt caaattgagc  
45601 catttcagcg attaaaactt caggagatac cacaactcca ttgccaatca cattgatata  
45661 ccttgagtgt aaaacaccac ttggcataag atgaagtgcg tatcttacgc catttaccba  
45721 aatagtatgt cctgcattat ggccccctgc actgcgacac acatagtcac aattttcaca  
45781 taatttgtct actactttac ccttaccttc gtcaccccat tgaattccaa caataatc  
45841 tgctttactc attattttcc ttaaatttta cggcgagaag atgagagaat cgaactcccc  
45901 aaagaatagt caactaccct ttcactctgat ttgaagtcag tggcgatcac cagatagcgt  
45961 aatcttccaa agttataatt ataactactt ttaaataaaa aacaaaataa attttcaaat  
46021 tttatcaaag catcgctaat ttttgacttt agttttaaata taagttataa tctcactctt  
46081 tttttcagca tcaaggtttg atgattacga tatttaggaa cttctttgaa atctttcaaa  
46141 caaaaatact taatcaattt ttgggacaat tcccgcgcta tgataacgct tggaaattta  
46201 agtgcagtat actttggaat ttttggcggg gtttgggctg ttacgggaga aatgacacgt  
46261 tgggggtggag aattttttaga gcttttgggt atggatttaa atggatattc ttattatcaa  
46321 aagcaaaatt taaatggcac tcctttaaca agaactgatg gaatcatgct tataggtatg  
46381 tttatagggt gtttaatcgc tgcgctttgg gctaataaaag tcaaatttcg cttacctgct  
46441 agcaatataa ggatctttca agccatagta ggtggaattc tttcaggcta tgggtcaaga  
46501 cttgcctttg ggtgtaactt ggcaaacctt tttacgggct tgccttattt ttcattgcat  
46561 acttggtttt ttgggtgttt tatggtttta ggaatttatc ttgggtgtaa actttgtaac  
46621 acttcctttt ttaaaccctaa agcaaaaatta gagtgtgtca ataaagaaaa cattccttta  
46681 gtcaaaaaaa gctcgcgtac gaaatctcat tttgtcttag gtagtattct tttttagacc  
46741 tttttaatat ggggtgtttta tcttgtgctt gttaatggca atataagcac acaaagcaaa  
46801 caaagccttt tagcttttagc actcattttt ggttttgtat ttggatttat catctccaga  
46861 ggacaaaatt gctttactgc ttgtttttaga gatttattct tatttggtag agaaaatgct  
46921 ataaaagggt ctttaacggg tatgataatc gcttctttga tcgcttttgc tttcatctta  
46981 catggacaca atagcaaact catcgaactc tctcccgcag tagccattgg ggcattttta  
47041 tttggttttg gtatagtttt cgcagggggg tgtgaatgtg gatggactta tctgtcctgc  
47101 gagggacaaa gtcattttat gatagtgggt attgcaaaca ttataggaac gatgatttta  
47161 gctctaactt atgacttttt acctagtgtc tttaaagagg gcgtaaaaat taacttgctc  
47221 aatgaatttg gaaatttagg tggatttttc ataaatctag ctctttttat tttgatgttt  
47281 gcttgtgttt tattttataa aaaacacttc tttcaaaaac taaacccaaa aggataaaaa  
47341 atgaaaatta cttatacttt aaatttagaa ggtgaagctt gtccttatcc tgctattgct  
47401 acgctagatg ctttaccgca acttaaaagt ggagaaattc tagaagtgtc ttgtgattgt  
47461 ccacaaagta tcaattctat acctcaagat gcaaaaaatc gtggttttta aattcttgaa  
47521 atcgatcaaa atggtccaac gcttcgattt ttgatccaaa agccttaaaa attttagctct  
47581 agttttaatc tcaaaagcta gagcaaatac aatttcatca atataaatca aatttcgaaa  
47641 ttttttcaaa catatcttac ttactaaaaa agtttttgca aattttataa gtcaaattta  
47701 gataaaaaag aagcaggaaa ttttagaggat attgaaacaa atatctcat tttataaaat  
47761 aatcttaaag ttcttttagc attctttcat atgcagcttt agttcctgga cggacttttag  
47821 taagtaaact tgtaatgatt atcactgctg aagcagctat aaaacctgga actatctcat  
47881 aataggggaa attaaagagt tctgctaaat aatttttcca aagaacaacc acagcagctc  
47941 ctgttatcat acctaaaatt gccctattc ttgtcattct gctccaaaat aaagagaaaa  
48001 gcattacaga accaaaactt gctccaaatc ccgcccattgc ataagctacg atacttaaaa  
48061 cacttgattc tttatccggt gaaatcacia aagcaactaa tgccaccaat aaaacaccca  
48121 ttcttcctaa attcatcacg gttttattag atgcttcttt gttgaaaatt cttttataaa  
48181 aatcctctgc tatagtagag cttgatataa gaagttgcga acttgcgtgta ctcataatag  
48241 cagctaaaaat agcactaagt aaaatacctg ctatccatgg attaaataaa agttgcgaca



48301 ttacaataaa gattttttca ggatcttgaa gagtaagctc aaatztatgc acataagcta  
48361 tccctaaaag acctataaag caagcaccta tcaaagaaat caccatccaa gaaattccta  
48421 caaatgtagc cgtaggaata tccttagtag aacgaataga cataaaacgc accaaaatat  
48481 gaggttgctc aaaatatccc aagccccaag caagcgcaga aactatactt aacgctccta  
48541 taccctcacc catagataaa gcattaggct tgatttcttc tataacagcc atagcctcac  
48601 caaaaccacc taaatgataa agcataacag caggaacaac gatcaatgca cccatcatta  
48661 aaagtccttg aagcaaatcc gtccaacaaa ctgctttata tccacctaag aaagtataag  
48721 caacaatgat aagtgtccct gtagtaagtg cgtattcata tcttatacca aaagttgctt  
48781 caaataatth tgctccacc acaagccctg atgagacata aaaagtghaa aatatcaaaa  
48841 tgacgatcgc acaactata cgcaagatat gtttatcatc atcaaatctt gtttcaaaat  
48901 aatcaggtat tgtaatcgaa tttgcaatca cacttgata aattctaagt ctttttgcta  
48961 caaagctcca attcaataaa gctccgatgc taagccctat ggcaatataa ctctctataa  
49021 gtccacttgc atacaaagcc cctggcaaac ccatcaaaag ccaaccactc atatcagaag  
49081 cccctgctgct tagtgagaa actactggac ctaaagaacg cccacctagg aaataatcct  
49141 ctgtatthtt atthttgtcta taaaaataaa aacctatata aagcattaaa gcggcgtatg  
49201 ccacaaacat tatcgctatg ggggtattaa tttgaaactgt ttccatthtt actccttaat  
49261 ttaatgatga tttaacgctc taatgcctaa atthccataa cgatggaaag atatacttaa  
49321 agctthttcg ttgtgataaa ataaaaattc aaaacgacca tttaacaatg gctthttctt  
49381 gatgataatc ttagctthtt ttgctgctc ttgataaatt tcatcttcca tacttacttt  
49441 tccatgatag cggattctct caaaattctt caatcttgaa acaaatttcg ccttgctttc  
49501 atthgtgatt tcaagattta gatttatagc tttgcaaagt tctthtacta aagaaattht  
49561 agcattctct tcatagctta cgctcaaagg gatatttaag atattggctg cgatgataac  
49621 tcctaaaata tcttgtaaat tatcattctc gcacacccta aaagctaaat thttaatctt  
49681 ggtataagaa aatagattgt cctcgccacg gatattgaca taatctthtt aaacactgaa  
49741 thcattthctg tgatgatagc cataagattt tgccatcaaa atagcattgt thaaagctth  
49801 thtgthttct tcatthgtat taagatctat thtttccaaa gctthgacaa gttcgttggt  
49861 gagtaaattt tcatcagctt cattthgtgtt tatatctaaa aactgggtta tataattata  
49921 aattcctact thtctaccaa aacctatagc agatthtttc actccaccaa aaggtthggcg  
49981 aagcactata gctcctgttg taggctthatt gatatagata thtctgctt ctatatgagt  
50041 gtgaaaatac tcccattctc thtcatctaa gctctcaaac cctgcagtaa gaccatagcc  
50101 tgttgaaattg actatctcta tagctthttt taaatcttht gctthcatta cactthaaat  
50161 cggtacaaaa agctcattca tatgagtaaa atcaccttht thggtgcat atthttatccc  
50221 tggagctatc aaataaggat tgtthtctaa aaattgaggt thtaagccc atthtctata  
50281 aggggctaatt cattthaaag cthtttctac cttagcacta ggcttatctg ctaatgtacc  
50341 taattthattt thaaattcaa aaggattthc cacagccata gaagcagctg catctactaa  
50401 agtctthttta aattctthcat cthcataaac thtctctctt aaaacaagca aagaagtagc  
50461 cgagcatttht tgaccgctgt tgctaaaagc agaattggatg atatthttta tgcactgtc  
50521 acgatctgca aattthagaaa caatcgtagc atthtttcca cccgthtcag cactthaaag  
50581 caaggtagga thtgctthta gcatagcata agccgtatct tctccacctg taagtataga  
50641 gaattthcact gctthcatca caagtaata thtagaaata tcactthctt thgaaggcaa  
50701 gaaaatcaaa gcatctthtg taattcctgc atccccaaaa cactthacaaa gcatatagcc  
50761 tgthaaaggtt gaaagcgaag aaggctthata aattacaaca thgcccgtg ctaatggtgc  
50821 tgctatgggtt ccaactgaaa tacctatagg gaaattccaa ggagctatgg thtactctat  
50881 gcctthtaggg ctaaattgag tathtttatt thgctctctt aaaatcctta gagaatgctg  
50941 ataaaaattca gtaaaatcga tagctthcact tactthctgga tctgatttcta agaaagthtt  
51001 tcccacctca agcgcagcca aacctatcaa atccccacga cgtctctca tcaaatthgc  
51061 agctthtagct aaaatagcat gaattthcatc aaaactthgta thttthaaat tagaatttht  
51121 agctactthca agagctthtt taattthcatt thcacctgct aaataagctt thcctatcac  
51181 tctatctthg atthttatctt taactthctaa aacattthaa gcattthttat caaattctaa  
51241 atctccgatt acaggcatta catcataaatt thctaaatth tcatatthtag cctthtagac  
51301 thtagcccat gctctattht gtggtaaaat aaaatccgta tctctthctg thtaaacac  
51361 tccactthca taagcactta ctatatthgg agctthgtth ctatctthgg thcgggtgtg  
51421 gctattatca agcgtthttaa tacctthctaa agatthtaag aaaagthctt thtgatcatt  
51481 ccagthtatta tcccactth tgagattgaa aaaatatctc atgaaattat cthcactthg

51541 attttcatca aggcgtctta caagataagc aatggcatta ttaaaatgtg cttcatcgca  
51601 aacaggtgca taaagaatta aatcgtgcat tttagacaat tcataagaac attgcaaact  
51661 cataccttca agcatttcaa aagtgaaga atcaagagct cctgcttcac tgatgcgtgt  
51721 gtaagcataa gcgatttcaa agatattgtg gcttgcgata cctatattga tatatttata  
51781 attatctccc tctaaaacaa aatcaagcat tttgtttagg ttactatctg tgtctatttt  
51841 tttataaaaa gtaggaagtt cccatcctct ttgacttgcg atcgtttctt cgctttccat  
51901 atttgcacct tttacaaagc gaattttaat aggcttcatt ccttttaaaa ctctttcttt  
51961 tgagaaaagca aaaagttttt taagatactc ataagaatca ggtatgtaag cttgtaaaac  
52021 aatacccgct ttaatatcaa atttagaaac actttccata aaggcagcaa cggttagttc  
52081 taaatctcta aattcttcca tgtcaagatt gataaatttg ctcacacctt gctttttttc  
52141 ttcttctaag gctaaagcat aaagatgata aagtctttta accacttcat ccttggagta  
52201 ttcaaagtca atgatattaa tttgtgaaaa aatagtagtg attttaatcg aatataagt  
52261 aatatagctt gattttaag cttcttcata tttttgaatg cggatatttgc tttctgcttc  
52321 gcccaaaacc tcttcgcaa tcaaattcac atttaaagt atattatctt gatcctttct  
52381 tttacgcata tgaggttcta aaacactagg atttgcatcc aaaaccatag ctttagtatac  
52441 ttctcttaaa tgttttataa aaaatggaac gcttaaatta ggtgcaaatt taccaaaatt  
52501 taaaaaacta aagagcaaga atttctcaa agcgctaaaa aaatctgcta taccatactt  
52561 atttaaagta tgttcgataa gctcaaaact tgctctttta tccttacatc taaaagaacg  
52621 gtcaagcaat tcgatcagca tgactttatt ttcaggatta ttaagaagct tttgcatttt  
52681 agcatggaat tctttttcag aatttgaaat gtttgcttct atttttcctt gcaattcttc  
52741 agctaaagct aaggattttt gtatcatttt tacatctcct aaggataaaa taatatttta  
52801 agtaaaaata atattataaa taaagtaaaa ataagatttt aaatttaaaa aatgtataaa  
52861 aaaggattaa aaaatttttt acgggtatat aagtaacaaa aattaagaaa ataaaaatct  
52921 atcatcttgt ttagctactg ctttggcaac aatttttagct ttaatatatt catcttctaa  
52981 agctttaagg cattctaaag cttttttctc ttctatggcg attaagagtc ctctgaagt  
53041 ttgaggatcg caaagcagta aatcttctc atttaaacta ggataaagct cttgcatgaa  
53101 atctaaattt ttataagctc caccaggaat caaacccata tcaaaatatt ctttcacacc  
53161 ctctaaataa ggaagctcat ttttaaaaat cataaatgaa atgctatcat ttaacatttc  
53221 tcttaaagt ctaaaaagc caaaacctgt aacatcgctc atcgcattaa ccccaaaacg  
53281 aagtgcatt tgactggatt tataatttaa actcatcata ctttcaagca tacgatctaa  
53341 atgtttttct tctaacattt gagcttttaa agctgtgctt aaaatacccg ttctaaagg  
53401 cttggttaaa agaatcaaat ccccttcttt agcgggatta ttagctataa attttttagg  
53461 gtgcacctt cctgttacac taagtccaaa gaaaagctca ccactttcta tagtatgcc  
53521 accaacgata atgccaccac attcttgaac cttgtcattt gcaccttgca ataattcttg  
53581 caagatattt aattcatgat ggcaagatc aaagcctact atatttaaaag cattaatcac  
53641 ctctgcgcc atagcaaaca catcacttaa agcattggct gcagcaatag caccaaaatg  
53701 ataagcacta tctactatag gaggatgaa atcaagcgtt tgcactaagg ccaattcagg  
53761 actaatttga aaaacacttg cgtcttcatt attgccgata tcaactgagta aagctgggct  
53821 tgtttgcatg aaatttaaaa ttgttttaag accaccggg ctttaatttcg ctgctcaacc  
53881 tgctgctttt acaaagtgtg ttagattctg gtttttgat tccatatttt cttataaag  
53941 tgatgatttt tgccttgcca caaagctcat ttaaaatctc ataagcatta ccaatgcttc  
54001 ctatcttaag ctcttgctt tttccaaaaa attctaaaca agctccacag cttataatct  
54061 caacacctaa tttttcaagt tctttcattg ccaaatgagc tctatgactc tcatctacat  
54121 tgataaaaac actttcattg acacaaagaa ttttactcgg gatattttct acatttttta  
54181 aagtacttaa aaaacctacg agtaaatatt ctctagttt gccatcacct actttgtctg  
54241 tctttaaaaa taaaacatta tattcatctg tactggcttt ggaaaaatca agctcttggt  
54301 tttttaccct tatataaaat tcattattat tttcttcgat atcagcgtgt aaattcaaag  
54361 aagctaaaaa tttcaaaaca ttatttttag aaataacaga atttaataca atttctaaaa  
54421 tttcattatt ttgaagattt tgaagtgtt tttttgtctc aacaataggc ttaggacact  
54481 caagatttct acaatcaatt ctcatatttt ctcttgatt taataaacia aataataata  
54541 ctttcttgct tttttgtct ttaaatcaaa gaaatatgca agcttattaa attgcttgca  
54601 tttaaaaatt gaaaaaact aagcttaaaa attatttttt atgtttaaaa aacaattctt  
54661 taaagcgctt attggcatat tcttcgatat ctttttgcaa aatagcgtaa ttttcataa  
54721 gctccatagc tcttggcgta agcttgggtg ctgactcctt agaacgacc tccttgagc

54781 ttactaaaat ttcttgagaa tttttttgta aaacttgcaa atgcatccaa gcttttttat  
54841 aatttatccc cataagtttt gaagcatgaa gcaaacttcc tgtttgtcct atgagttcta  
54901 aaagctcggg ttttcctttt ccaaaaagca aatctccgtc tgcgttttct atccaagtct  
54961 tagttctaac tacaactgc ttgccttttt tttctttaaa acaaccaagt tggcaatatt  
55021 tcacatcaat tttatatgct tttaaagcag aacgcattga ttttaacca cagccctctt  
55081 tggcaatatc tcttgcatcc ttgcaaaaaa ttctacgctt ttcatactaa ctaggctcta  
55141 cttttcttaa aacttctatt tttgcttttt caaaatcaag atgaccaaat tgcccaagct  
55201 cgcaattatc aatacgaatt ccattgatata ctgctatttt acctatctct tctatggcta  
55261 catcaaattt cttagcgatt ttaaaagctg ttccacaatc aagcttttca ttgctattta  
55321 aaagctcttt catataagct agtatttctt tatttttatc cattgattct attttctcca  
55381 ctataaatat tgatattttc accccttgca aagccacaaa gtgttaaadc aaattttctt  
55441 gctatcatga cacctaaaca agtaggggct gtacgcgaaa caagaacagg aattttatgc  
55501 atcaccgcct tagccacat ttcagaacta agccttccgc taaccattaa aaaacattta  
55561 ctaagctcta ctcccgaag tcttgctttt cctaaagctt tatctatggg attgtgttgg  
55621 gctatatcct cacctataaa aaaagtatct ttatcgacia aaagtttggc tgtgtgtaca  
55681 caacctgttt tttcataaag atcgattga gtataaaatt cactcatttg ttttaaaatt  
55741 tcatctttat taaattttac cgcacttggt attttacttg cttctatact ttgtggatca  
55801 atattggctg tatgagctct accacaaccg cttatcacca cgccttcagc attcagcttg  
55861 gctagatttt ctttatcaat cttagcttta atatgcacac tcatgccatc atctttagtt  
55921 tctatactct ttatatcaga taccttagca atgatatttt cactcatcaa ataccccacc  
55981 gccaaagctt gctcatctac aggagttgcc attaaagcgc ctactttttc atcattgata  
56041 aaaatttcaa gtttgatttc acgcactaaa gtatcatcac aagtaaataa atctttgcct  
56101 ttgtatttta aaatttgagt tgtaaataag ggttccattg ttatctcttt agtataaatt  
56161 aaaattataa agtattata tcaaaaaaat ataattatca gaaatatatg aaaatatagg  
56221 catttcattt tatgcatttt tgataattaa aagtattttt tataaatttt ggacttaaaa  
56281 atttgtgaaa atctcctaaa aattttaaaa gattttcaca gagtaaaatt taaattttta  
56341 cattaggatc gtaagaaaaa ctaggttcta tttgtttttt gctgcttaat tctttatacc  
56401 aatagctatg caagatataa acctcttctt cttctttata tccacttacc atagaatgaa  
56461 tacttccttt aatagcaaat accgccatat aaatatgaat tccaaagaat actgcacaaa  
56521 tgattcctaa gaaattatga ataatagctg aaagtcttaa aagctcaatt tgtgttaaac  
56581 caaaaagacc ttgaatggca gtagaattaa aatcaagaaa atacataaag ccgcctgtga  
56641 taatcatcaa aaatccacca aatacagcaa tataatacca agatttttgc ccaaaattaa  
56701 atttaccgcg aggaacaggg cgttttactt tgcttaaata gccaccact atcatcatcc  
56761 atcttatatc atagctagca ggaagcattc tttttatcca ccataaaaaac ataggaatga  
56821 tagaaatgat aaataaaatc gttgcaaaaag catgtaagtt tttgcatact cttacaaaca  
56881 cgccgcctcc aaaagttgca ccaaactca tcacaaaacc cgtaggtacc aaaatcacc  
56941 acgaaatagc cgcgataaaa tgaaaaattc tttcaaataa agaaaaggca taaattttct  
57001 ttcatcatg agaaaattgt tttggacctc tcaccatata atgcaaagca aaagctgaaa  
57061 gaactgcaat gattgcaatc aaagctatag tagctatata ctcacctgac aaagttgtcc  
57121 aaagcttacc aaaagtatca taatttggaa tatttgaat acgatgaaaa tcccaattt  
57181 gtgtatcttg tcccattcgt tcaactgcat aggcaacaa acttacaana gtgcttaaaa  
57241 gtgttatcaa tatttttttc ataagcgttc ctttcctatg taagcaattt tccattctat  
57301 actttgcgaa ggattagcaa ttccataacc cctactttgc aatctgctat gataaatttc  
57361 ttctatctta gagctttcac ctactaaaag tgcttttagtt gagcacatag ctgcacatac  
57421 aggcactttt cttcagcga tacgattttg tccataaagc tctctttctt tttccgaatt  
57481 tgtactttca ggtccacctg cacacatcgt acatttatcc ataatgcctt tgttaccaaa  
57541 tacgctatct tttggaaatt gtggagcacc aaaaggacaa gcgtaaagac aataaccaca  
57601 acctatacaa atttccttat cgtgtaaaaac gataccatct gcacggatat aaaaaaatc  
57661 cacagggcaa actatagcac aaggtgcatc atcacaatgc atacaagaaa tcgaagtaga  
57721 aacttctttt cttgtactc cttcatthaag ggtgatgaca cgacgacgac ggatattgat  
57781 aggaagctca tgcgcttcat cacaagcaac cgaacatcca ttacaatcaa tacaacgctc  
57841 attgtcacia aagaatttca agcgttcttt ttctaaattt gcaaaattta cttactcat  
57901 cttttacacc ccatcttttg agatacggca taggccgcct ttggtttcag gaatttgaca  
57961 cataatgtca taaccataat ttgtaactgt atttgcactt tctccacttg cataaggttt

58021 ggttccttta gggaaattat gcgttaaadc cacaccctgc atcacacctg taaaatggaa  
58081 aggcaagaaa atcatatctt ttgctacacc tggattgagt tttaccctca catgaatfff  
58141 agttccttct ggagaatgca cccaaatcat atctcctgct ttaatctfff gctcatttgc  
58201 aagttcagga tttatctcac aaaacatttc aggtgttaaa cgagtaagat acatcgaagc  
58261 tctatfffcc atgcctgcac catttaaatt tacaagtctt gctgtaacta ggttgagtgg  
58321 gaattcttta gaataatcct tagccttttg cacagaaaca aatttcgtat ccacacgata  
58381 aagcgctfff tgatcctcaa aactaggata tttttgcacc aaatcatttc ttggagaatg  
58441 aagcggttca cggatgaagt gaatttgatc tttaaatgct caaacaccg ccctagcttt  
58501 agcatttcca taaggcacta tacctffffc tatacattta gttgctatga tattgctatc  
58561 atcataagac caaattgcac ccattctfff ttttcttca gcacttaagg taatgcctag  
58621 aactffffct atattatctt tagtgatttg tggataacct gtatctatag gtgaatftat  
58681 cggagcattt ttagccaata aattttcacc ttcatactca aggccaaaat tatttctaaa  
58741 tccatacca cttttgcca cttcgatata ggtattataa agtacaggag aacctggatg  
58801 tttatcactc cagcaaggcc aaggaagtcc atagtattca cccgctaatt catctttacc  
58861 ttctaaggtt acctcatcaa atttatcca atgtaaagta tgttttttaa gcttttcagg  
58921 actccaacca ttaagcccta tgcttctaac cgatcttgcg atttctcttg tagcattttc  
58981 aggccaaacg atcttaccat tttcatcgcg taaagtttta gtaaagtcct cataaaaacc  
59041 taatfffftg gcaagctcaa ataaaatttc ttgatcttct ttgctttcat aaagtggatc  
59101 tataacctta aatctccatt gtccgctacg atttgtagct gttacacttc cacttgtttc  
59161 aaactgcggt gcagcaggta aaagataaat tccatctfff ttttctgca taatccctgc  
59221 ttcattgaca aaaggatcag ctaaaaccaa aagttctaaa gcttccaaac cttctttaac  
59281 tttagcttgc tgtgcagttg aagtgatacc atttcccatt accaccaaag cttttaaagg  
59341 cgttcctgca ttatccactt tatcatttcc atctttgcca tttaaaggctg cagcccacca  
59401 cctagcaagt gaaagtccgg ttttatgcat ccaatctttg tttacaaaat ttcccaaaag  
59461 ccactcataa tcaacacccc aaatcttagc ataatatctc caagtcgctt catttaaagg  
59521 gtaataacct ggtaaatttt cactcaagca cgccatatct gaagcacctt gcacattatc  
59581 gtgtccgctg aaaaatattta ccccgccacc aaatttacct atatttcca aaaccatttg  
59641 cactatagga gccaaacgcg tatttgaggt tcctacgggtg tgctgtgtta aacctatagc  
59701 ccaaatcaat gtagtcggtt tatttttagc tacttcatga gtgatttgaa taagaagttc  
59761 tttagaaatt cctgttacct tttctacttc ttcagcagtc cttttgtagc cttcttcagc  
59821 aatffffatc ataccaaaaa ctctttcatc aaggtatfff gtatcttcta aaccttcac  
59881 aaaaatgatt tttaacattc catacatgaa agcaatatca gtacctggac gaattcttgc  
59941 ataaatatct gcttttgctg cactctttgt aaatctagga tctacaacga taagcttagc  
60001 acctffffct tttgctttta agaagtgtct aaaacctaca ggggtgattta ctgctggatt  
60061 tgctccaata ataataatgc atttacttct ttgaatatct ccaagatggt ttgtcatagc  
60121 gccataacca aatgtattcg ccacaccggc gactgttgcg ctgtgtcaaa ttctagcttg  
60181 atgatctaca ttattggttc caaaaaatgc tgcgaatfff cttatataat aagcttgttc  
60241 attatftagt tttgcagagc ccaaaaacat aacgctttct ggatfttctt tacgatagcc  
60301 tgctaatttt tctccgattt cacttaaacg ttgttcgtaa gaaatgcggt tccattctcc  
60361 atttctfff ttcatagggt atfttaaacg cacatgagaa cgcaccatat cgatcatatc  
60421 agagccctta cagcaatgac ctccggagct aacaggatga tcttgtgca tttcttggcg  
60481 taaccacact ccgttttgaa cctctgcgat aattccacag cccacagaac atgcgggtaca  
60541 tacactctta atctfttgac ttccttcata agcttctfff aattcatctg catttgcttc  
60601 tcttaaagtt tcgcttctag cttagcaacgg acttgccaaa cttgaaagcg cagccatttt  
60661 aagaaaagaa cggcgattaa gcttgatagt ttcattcata cttgacatta ttcagccctc  
60721 atataatatt tttcccaatt agcacttctt tgataaagta cttctftttt tttgctfttg  
60781 cctctaacia gatctfttct tcttctatct tgcccaaaag ctacacttgc accgcctaaa  
60841 agacttgtag tacccaaagc aatagcagat tftttaagaa attccttgcg atftttcacg  
60901 agacctctt tgtttatftg cttctcttct taaaaattca gaacgagata aatcattftg  
60961 aactftfttg gaaggftftg tggtaggttt ttcaagttca aaacaatatc tttcaaatc  
61021 tacaactgc acagcaatat ttgctatftc tttataaagc tttgctfttg aatftgaaaa  
61081 aataagcatt aaaaattcat caatgccttg attgatgact tfttcaaca atgccttagc  
61141 aagttcatct tccttatftt ttagaaattc actcatcaaa ataaaacaaa atcttatact  
61201 atcttcagct tctfttaaaaa tftfttctt gcgccggatt gtactftftg ctaaaatctg

61261 ccttacatta agcaatgctt ttgaatthttc aaaaccttct tctatataag agaaagtcac  
61321 aggaatagta tttttaagtg ctaaaaaaag ctcgctgtat tctttataaa atgcttggag  
61381 atcttgcgta tcttttaaat tagaaagtaa aatttcaaaa cttgttctta aactttcatc  
61441 aaataaaccc tcttgcatag cttctaataa agcttttaaa ttgcataatc tattttcggg  
61501 aaatgaaaaa acgaaaagtt ctcctaagca ctgataataa agacttctag ctaatcttag  
61561 tttttctaaa tccattttta actcattcaa atttttgaag atttgtcggt aaataatttg  
61621 caaaataata ttatgcaaat tacaccta atttcttctt aatccttatt tttgactgat  
61681 ttatctta atgatttggt ttaaaataaa ctgaatthttt cttaaaaatc tgcctgatct  
61741 gaaaaaatag aatttagctt taaaagccta taaaatagta ttttaatgga tatttttaaa  
61801 aaaagttgca taaaatattt aagcctaata aacaaaactt tcattttgtc atttaaaaaa  
61861 tattttatgc taaaagaaa taataaaatt atttcttcaa aaaatthttt atttcttaaa  
61921 gcataatcct tataagaaaa ttctcttatc atttcaagtt cttttttgga attcaaaagc  
61981 attaaatttg gaagtcttat gccattaaaa gttgtatthtt ttactataga ataatgaatt  
62041 tgatctaaaa ataccacct atctccgctg tttaatctt ctttaaaggc gtattctccc  
62101 atcacatctc cggctaaaca agtatttctt gtaagcaaat aagcaaattc attttctttt  
62161 aaatctgaaa ttttttcatt ttctcttggt gctaaaattc tagcatttaa aacctcgctt  
62221 gtataaggca tgatgatagt atcaggcata tgagcttctg ttgaagtgtc taaaatagca  
62281 attcttttct cattttcaac tatatccact acacttgcta ccaaaacccc actttgcaa  
62341 cccacagctt ctctggctc aagataaact tgcacgcat atttatcgct aaatttctta  
62401 caaagagtga tgattttttg gatatcatag ccctgttttg tgatatgatg tcccccgcca  
62461 aaattgacc atttcatctg tttaatccat ttgccaaatt tctcttcaaa aactttcaaa  
62521 acagcttcta aagcatctgc actctcttgc caaagtgcac gaaaatgaag tcttctact  
62581 ccacttaaat cacaattttc taaatccttg ctcaaaatcc ctagtctaga atatttccc  
62641 caaggattat aaagctcttt aggagcaaaa gaaaattcta aattacaacg aagccctaaa  
62701 gagttattag tacacaagga tttaaattta tcaaattgat acaaagaatt aaaaacaata  
62761 tgatgggata aatgagcaat ctcaactcatt tcatcttctt taaaagcagg cgaataggta  
62821 tgaatttctt tatccatgta ttcttttagca aattttgttt ccaaagccc actacaagta  
62881 catcctttaa gatactcacc tacaattttc atcgcccctg aaaaagcaaa accttttaga  
62941 gctaaaagca ctttagctcc gcttttttca ccaacatttg ctaaaattt acattttttt  
63001 cttaatttat ctctctcaa aatataagct ggagtttgaa attttttata aaacattatt  
63061 tttcttgat taaattgcca aaatcataac aaaattaagc caaattttca aaataaatat  
63121 ttactaaaat taaaaaata atgattataa tacaataaga ttaaaatgag gaagaatgaa  
63181 tgaatagaag aaattthttt aaatttaata cactcactct agcaagtata ggcatggctt  
63241 atgctagtcc tatgcatgat atgcattcta tgcacaaaaa tcattctata aatcatcatt  
63301 tagatactt ttttataaat tttgctcaa aaaatthtaa gcttttagat ccaaaacaat  
63361 tccctcaagg ggaaatthtt aaagccttac ctttgctcaa aaatgaaagt aaagaaaaaa  
63421 atattthttc cgctaccata gaaatcaagg aaaatcacat agagctcatc aaaggtaaaa  
63481 aaactctatt ttacacttac aatggcttaa taccggctcc aaaaatagaa gtttttgaag  
63541 gagataaact tgaaatthtt gttaaaaacg aacttaaaga ggctacaact atacattggc  
63601 atgggtgtcc cgtaccgctt gatcaagatg gaagtccaca tgatcctatc ttagcaggag  
63661 aggaaagaat atatcgattt gaaattcctc aagatagtgc agggacttat tggatcatc  
63721 cacaccaca tttcactact tctaagcaag tttttatggg attggctgga gcttttgtga  
63781 ttaaggcgaa aaaagatgct ttaagtcatt taaaagaaag agatttgatg attagtgatt  
63841 tgcgccttga tgaaaatgct caaattcaa acaacaacct aaatgattgg cttaatggta  
63901 gagagggtga gcttgactc atcaatggac aattthaaacc taaaatcaa ctcactacca  
63961 atgaacgcat acgcatttat aatgctactg cggcaagata tttaaattta cgcatacaag  
64021 gagctaaatt tatacttggt ggtactgatg gaggacttat agaaaaacct atttthaaag  
64081 aggaacttht cttaagtcct gcttctctg tagaagthtt gattcatacc caaaagatg  
64141 gagaatttat attagaaagt acttattatg atagagataa aatgatggta aaagaagagc  
64201 ctaactactc atthtttagct gatattaatc taaaaaaaga aaatthaaa cttcaaaaa  
64261 atthaaaaaa tttcaaacct tcagaagaac ctaaggaatt taaagaata atcatgagt  
64321 aagatcacat gcaaatgcat ggaatgaagg acaaaagtga agatgaatta aaaactgctc  
64381 ttgcatctat gttthtaata aatggcaaaa gttatgattt aaaacgcgtt gattthaaat  
64441 ctaaatcgg agtagttgag gattggatag taattaacaa atctcacatg gatcatcctt

64501 ttcacataca tggtagacacaa tttgaactca tctcatcaaa gctaaatggc aaagttcaaa  
64561 aagctgaatt tagagcttta agagatacta taaatgtgcg tcctaatagaa gaactaagac  
64621 ttagaatgaa acaagatttc aaaggactta gaatgtttca ttgtcatatt ttagaacatg  
64681 aagatttagg aatgatggga aatntagagg taaaggagta aaatggtaaa agtagaattt  
64741 ttaggtccta tcaataaacc aaaactagaa ttaaacataa aaaatttaaa agaattaaaa  
64801 gcaattttac aagaagatga aagtttaaaa gaatggctag agctttgctg tgtatcttta  
64861 aatgatgaaa tcgtatttga tgaaaatact agcttaaaag atggtgataa aatcgcactt  
64921 ttaccaccgg tttgtggggg ttaaagatgagt gaatttgtat tgacaaaataa tgccttagat  
64981 attccgcaaa tttatgcaaa atggatgaa tttgccaagg ataaaaactg cgggtgctttg  
65041 ctgacttttt gtggtattgt gcgcaagaa gggggtattg aagcacttag ctttgatatt  
65101 tatgagccac ttttgaaaa atggtttgat gaatggcaaa aaagagttga agaagaaggt  
65161 gtgatcttgc tttttgcaca ttcaatcgga gatgtaaaaa cacatgaaag ctcttatcta  
65221 gcaggagttt taagcaagca aagaaaatta gggctaaaac tcatcaatga atttgtagaa  
65281 gattttaaag caagcgcgcc ctttggaata tatgatgtga taaacaagca aagaatttac  
65341 gccaaagaaa gatcaagtaa actttgtgga gcgggtcttt taaaatcata atttaatttt  
65401 ttaaaaatca atcttgacaa atgaaggaat aaaaatgcta atgtcttatg aagaaagtct  
65461 aaaaatttta cactctcata tcaaactttt ttcaagagtg gaaaaaatag ctcttactga  
65521 gtgtttgggg cgaattttag ctgaggatat aaaagcgagt aaaaaccagc ctgaattttt  
65581 aacttcagcc atggatggtt atgctatcaa atttgaagat caggacaaac ctttaaaaat  
65641 tttaggcatc acacctgcag ggactatgcc tgaatttaaa gtagaaaacg atacttgtgt  
65701 caaaccttt acaggatcgc ttatgagcga aggaagtgat actttagtgc ctgttgaaaa  
65761 tgttcgtgtg gaaaaagata cactttttat agaaaaaag gtttctaaag gctttgcagt  
65821 tagagaaatc ggagaaaatt ataaaaaaga tgaaatttta ctcaaaaaag gcacaaaact  
65881 aagctatagt gaaatagctc ttttgccgga acttgattt tttcacatca gtgtatttat  
65941 aaagcctatc ataggagttt taagcagtgg gagcgagata aaagatctag gagaagcctt  
66001 agaaaatcct gctcaaatc gatcttcaaa ccatatcgc atagccagct tagctaagaa  
66061 tttaaattgc gatacaaggg tttttccact tttaaaagat gatgaaaaag ctactttttc  
66121 tacccttgaa agcgcattgc aaagttgtga tttttgggtt acgacgggtg gagtttcgat  
66181 gggagatttt gactttttta aaaaagctat taaagagtat gaactcatca tcgataaagc  
66241 agatatcaaa ccaggaagac atatcaagat agctaaggct aatgaaaaat tcatcatcgc  
66301 tttaccaggt tttccttact cggctatggt gatgtttaat ctttatgcaa gagagatttt  
66361 aaactcttgg ctacttcaac caaaagacta tttttgcaa gcctttttgc aaggaagtta  
66421 taagaaaaaa acaccttatt tggaaattgt tgcttgcaat gtggaattta aaaatggagc  
66481 cttttggca aatttagaag gcaaaaaaga aggctcaagt gcgatcataa acaatcttaa  
66541 caataaagcc gcaactgatga tagcgccaaa agaatgtgaa attttagaaa atgaaagcct  
66601 ggtagatatt atcttcatgc cttgaaattt gtcaaaaagg tttaaatcac ctttttgact  
66661 tctttttgcc cttttaaact aagccaaacg attaaaaatg aaatgaaata agcaagtgta  
66721 aatgaaatac tgatataaaa tattatatcc actatcgttg cttgtaatct tatactacct  
66781 aatagcccaa taaaagtata aaatatctta cttgcaattt caccacaaac aaaaaatgca  
66841 aaaacaagat agaaaagttt ttcttttgta gtttgaacta aagcttttaa gaagaaaaag  
66901 gcgatgataa tgcagactat acttataatt ttatccaaaa taaaattttc aataaaaaaca  
66961 tcttcgcca ttattaattt taaaataaag cgcaaatcc atccaaaaat aaccaaacc  
67021 tgccatataa gaaaataaat aaacatttta taagttttta gctttttaca aaataaaaac  
67081 aacttaata aagctaaaaa tgttgctata tgaactaaaa catatcgaat atcaacaaga  
67141 ttgtatatca acttatcata atcctcaaaa taaaaaaatc ctctccgtat ggattgaaat  
67201 ataattcttt gagtaaattt taaacaaaaa ataacaaaag acaaaaccaa aaacaaagcc  
67261 attgtaattt taatccattt taaatcaaaa tcaaaaacct tttttgtgt tttcaccgcc  
67321 atttcttgcg aatgtgaaaa ttcttgctta tcaagttctt caaattttat ccatgcgaaa  
67381 atccaaaaaa tcaacttgc cagtaaaaac accaaaccta tgccgataat caaagtaaga  
67441 agccctaat aacaagtatt aaaagcataa atgaaatact tttgctttgt tactctagca  
67501 atttcatagt aaaaagcttt caaaaaagga aaaattaaag ccaaagcaat gataaaaagc  
67561 acgctaaaag tggttatagc tgaaaatata ctatcttgat taaaataaaa gttacaaaa  
67621 aagtcaattc taggcttcaa aatcacaat aaagaacttg tactaacaag cgtacaaaa  
67681 aagctaattc cgggtgcaat aaagaaattt ttaataaat ttttagcacc gccatagatt

67741 tttaaatcat aaagcaagat aaaaaataaa atccaactca caagattaaa taaaacccca  
67801 agataaggaa taataacttaa aaatccacaa acaatgctcg ctatagcttt aaagcgaatt  
67861 tcttttatct tcttttgaac taaaatttca tgtaaatttt gcattaaaat tccttaaaaa  
67921 attaaaaagg atattttact gaattttgta taaaatgaat cattatatat aaaatatttt  
67981 caacttaagc tattttgaga ttattttaat cataacaaaa tctcttatga tcttcacact  
68041 aacgctctta taaaatccta tatatcaaac ttatcaagat atcttttgaa aatattttata  
68101 atgaaaatac gaaaaataac tttaatataa gtttattttt gtaacaatat taattaaata  
68161 ttaatatatt aaaaatagtc atgaaattta agcattaatt ataggagaaa acatgccaat  
68221 ttttatgata tgttctacac ttttagcagt aattgtcgtt gcttattaca tacttaaaaa  
68281 atacaatcct atttttgtat ttttactttc aggtatcatc ttgcttattt ttgcttttta  
68341 tatcacagga gcacctatac ccaaagcccc aagcagagaa catgcaagtt ttttagatgt  
68401 tttacttgat agctacgcct ttatcacgga aacttttaaa agtcagcttt ctggggtagg  
68461 acttattatc atgagtgtag caggttttgc tgcttatatg aaacacatca acgcttcagc  
68521 taaactcgct tttttagcaa acaaaccctt ggggaaaatt aaaaataaat atttgatttt  
68581 aagcgggact tttgtcgttg gaatggcctt aaaaattggt atttctagtt atgctggact  
68641 tcttttactt ttattagcat gtatttatcc tgttttaatc tcaacttaaaa tccgtcctat  
68701 tacggctgta tgcgtgcttt cttaattgac acttgattat ggtccaaaag atggaaattc  
68761 aatcaatatg gcagatatgg taggacaaag cgataatgct gtaggacttt ttttaatta  
68821 tcaaatttat agcgtgattg cttatgtggg agttattgcc atcttaatac cttttattt  
68881 tgcttgggta gataaaagag ataaagaaaa aggaatttta aatgatgaag ttgaaattcc  
68941 accaatcatt gatcccaaat gccctacttt ttatatactc tttccttggg tgcctgttgt  
69001 atttttgttt atagcatatt tttttaccat caagcttgat gttgtaacag caaatttttt  
69061 aagtatttcc ttggtttttc ttggtgaatt tgcaagacat aaaaatgcta gaaaattagg  
69121 tgaagatatg atgggtgatt taaaggctat ggctgaaatt ttcactctctg ttgtaagtat  
69181 tatcattgct gctggagtct ttgctgaagg cattaaagct ttaggtggga tcaatatcct  
69241 tgctaatgct gtttcagatc ttgggacagg aaattttgcg tggtttgcca tacttttaag  
69301 tataactgtt ttaagctttt tagttttattt tgctacagtg attatgggaa gtgggattgc  
69361 tgcttttaat gcttttgga aactagctcc tgatatagct acaaaattag gcgttgcgcc  
69421 tatcactttt gttttaccta tagaaattgc atcttgttta ggacgcgcag cctcaccat  
69481 agcaggtggg atcatagctt tagctggatt tgtaaaagta gatccaatgg atattataaa  
69541 acgcaccact ccacttttac ttatagccat gataatcaat atagctgttg ctttttatct  
69601 agcaciaaagc aatcctttgc ctaaagaaaa taatataaaa actcaaact tactcaaac  
69661 aaattgatag atttatatct atcaattatc aaaaattgca ttaaaaagat aagtttttca  
69721 aattctgttc tgctttttgg gtaaaagttt cgtaaatttt tctgtattct ttttgccaac  
69781 ctggttttac tatcaaatga tcaaatttac ctccatagct tccaccacca aacctatatg  
69841 ctgtaagctc tcttgtaaaa gccaaaggtag gaatttgtaa aatatcgcaa agatgtaaat  
69901 taccgtatc tatagtaact aaaaaatcta gttttttaga aatacttact aaagaagcaa  
69961 tgctagcatt attgacaaag actttttaa atgaactttg atcgatatta tactgaaatag  
70021 aatttttatc ataatttaaa agcaciaaata aatacttagg gtatttcaaa gaaagctgcc  
70081 ttgcaagtcc tatccaatc tttataaaaa aattacatcc cacgtattca ctataatttg  
70141 aaaaagcatt aattcctata attttttcat attctatatac tattttatta aaaaaatcat  
70201 cacttaattt tgtatcgtaa ggcaatagat ttttgacttt agaaaaatta atttttgcaa  
70261 aattcttatc aaaatgttta gcattaattg ctctaactaa ttttagaaca atttcactca  
70321 tatgcttttt agctctaaaa aatggaaaag gtgtagtaaa ttttttagag cttatgctaa  
70381 caaaatgagg atacactatg ctttttgaa tatttaaaag ttttaatttt ttaaaatagc  
70441 aaccctgtct tcttgctgctg ataaaaattg ctggattttt attttcaatt agttcaaaaa  
70501 aatcattttt ataaattaaa acctcatcaa taaatgagat tttttctaaa aaactgccct  
70561 ccatcgcacc atcgggtcaac aaagatagtt tatattctgg ataaaagctgt ttgatagcat  
70621 acaaagcttt aaaacaaacc aataaatctc caaacatc tgcgtgaaat agtattttca  
70681 tttttatcgt cctattttata tttatataaa aatttcgctt ttgttacctt acaaaatttt  
70741 agcatttttt tgccctttta aattaagcca aacaattaaa aatgaaatga aataagcgac  
70801 cttaaaaagc aatatgtaat tatctatgat tgtttttata ggactttttg taaagatata  
70861 ataattatca accatcataa aaataaatga agttaatatt atcaaaattt ctatacaaac  
70921 aaaaaataca aaaacaagat aaaaaagctt ttctttttgtg atttgaacta aagtttttaa

70981 gaataaaaag gctaaaataa tataacaaag atttaatgcc atcatcaaac ttccatatgc  
71041 aattaatata tcattttatta tcaaagcagg gataaaaaga agatagctac caaaaacact  
71101 taaaccttgc catatgaaaa aataaataaa aagtttgtaa ttttttatct ttttacaaaa  
71161 caaaaacaca ctaagcaaag ctaggattat ggctgtgtaa aataaagttt tttttgtgta  
71221 gtaaaaccta aaatcttcaa agtcaataat ttctaataa aacgaaaatg ttaaaacgag  
71281 caagtttaaa attataaatg aagccattgt gatttttaat catttttaat caaaatcaaa  
71341 aacctttttt tgtgtttttg ctaatctttc ttctaaattt gaaagttctt gctcatcaaa  
71401 ttcttttaaa ttgatccacg ctaaaatcca aaaaaccaa cttgctagca aaaacaccac  
71461 gcctatgccg ataatacaag taagaagccc taaataacag gtattaaaag cataagtga  
71521 atacttttgc tttgttgctc tagtgatttc ataataaaaa gctttcaaaa aaggaaaaat  
71581 taaagccaaa atagcaaaat gtaatactaa aaatatagca atagccataa aaatattatc  
71641 ttgattaaaa taaagccac caaaaatgcc agttctaggc ttttagcattg caaataaaat  
71701 acttgattta ataagaatac caaaaaatcc aatccctgca gtgataaaaa gattcttaaa  
71761 taaattttta gcactgccat agatttttaa atcataaagc aagataaaaa ataaaatcca  
71821 actcacaaga ttaataaaaa cccaagata aggaataata cttaaaaatc cacaaacaat  
71881 gctcgctata gctttaaagc gaatttcttt tatcttcttt tgaactaaaa tctcatttaa  
71941 gctttgcatt tttatccttt atttaataca ttcacacaaa aacatttcac ttttatcatc  
72001 tttggcaatt tttttatcaa aagaagaata aataaaaaaa cgctcaaat caagttcctc  
72061 taaaatattt tcaatttctt ttaaatcata aagatggatt ttaaagtcca tcttttact  
72121 ttgcaaaagt ttatctttat catataattc ataaatagaa ggtgaaaatt gcgttttaga  
72181 aatttcatca taatgatttt tattctttta aatgagatct aaattttgct ctgttttgac  
72241 tttaatgctt attttataat cactatcatc tttacatctt gtcataatag tatcaagtgc  
72301 aaaaactaat tttccacctt tttttaaaaa agatttttaa tttcttaaaa gccttttgca  
72361 ctcatctata tcagtaatca agcacaaga acctgaactg ataaaaatat aatcaaaatc  
72421 ttcatcacta tgataagcca aaacatcgca tttgtgatt tttgcattgg gggctttttc  
72481 ttttaatttt tccaacatac tagtagaatt atccaccca ctaatatcaa aaccactttc  
72541 tataaagggc acaaaaaacc gccacttcc acacattaac tctaaaattt tatctttctt  
72601 atttgcataa gaaagataaa agtctaactc attcttaggg gcttttgtgt gcaaaatttc  
72661 atacattttc gtgcataaaa aatcataata atttgttttc actccaaaac aacaccttgc  
72721 ttaatcgtga tttcgccgat gataaaagcg tctgagtttt ctaaaacctt gcttacatta  
72781 gatggatcta caaccattac taaacctaca ccatattaa agcttctata catttcactt  
72841 tcttctacgg cttgtcctat ggtatagaaa atttcagggg ttttaagatg atgtttgcgt  
72901 atagttgctc ccattccacg aggtgaagcg cgtggtaaat tttctaccaa accacccctt  
72961 gtgatgtgcg ctaaagcatt gatataaggc tttaaagtaa gaaaatcgcg tacataaatt  
73021 cttgtaggtt ctaataaaac atcgattaaa tttttaccct ctattttatc atcaaatttc  
73081 agttttaaac tttcaaaaag tacttttcta gctaaagaat agccatttga atgaagtctt  
73141 gagctaggaa gtgcaagcaa aatatcgcca tttttaacaa atttacttct atcgatctca  
73201 tcttcttcag ccataccac tgcaaaacct gcaagatcaa aatcatcttt tgcatacatt  
73261 ccaggcattt cagcagtctc tccgcctatt aaagcacaat ttgccatttt acatccacta  
73321 gcaatacctg ctacaactga ctttgcaacc tctacttcaa gtttagctgt agcgtaataa  
73381 tccaagaaaa acaaaggagt ggcaaaatta caaatcaaat cattcacaca cattgctact  
73441 aaatcttgcc ctatggtatc gtattttttt gcatcaatag ccaaacgaag tttagttcca  
73501 acaccatctg tagcccccac aattacagga tttttaaagc cacttggcat tctaaaagct  
73561 ccagcaaaaag agcctatacc acctacaact ttatcattaa aggtttcttt taccaaaggt  
73621 ttgatcgctt ctacaaaggc attaccatta tctatactta ctccagcatc ttcgtatgaa  
73681 attttcattt attttctttt aagaactaaa aaggtatttt aacgaaaaaa gttttaataa  
73741 ggcataagat gaaaaatgct ttttttgtaa ccgcctcgat agcctgtggc aaaagcactt  
73801 ttatagaat cgcaaattct ttgggtttta aaagcattag cgagacagt atcgctcatg  
73861 aaattttaga taaatgctt ttggaactag ctcaaatttt ttctaaattt cacaaaaaaa  
73921 atttattgaa agcagaaggc aagatagata gaaaaattct tggagaaatt gtttttcaaa  
73981 ataaagaagc caaaaccatc ttagaaaatt tcaaccatcc taaaattcgt gctaaaattt  
74041 tagaacaat gcaaattcta gaacaagaaa ataaacctt tttttagtaa attcctcttt  
74101 tttttgaaag cggtgcttat gatggtttgg gaaaggttat cttaatctac gccctaaag  
74161 aacttagctt aaaaagaatc atacaaagag ataatttaag cttaaaagct gcaaaagcga



74221 ggcttgattc tcaaatggat attgaagaaa aacttaaaaa agcagatfff atcattaataa  
74281 atactggctc ttatgtcgat tttaggcaag aatgtgttaa agtaatacaa aatatttcca  
74341 aaggacaaat gtgaagcttt ataaatattg tgcaagtggc aatgattttg tcataatgaa  
74401 tgcaaatgaa aaaaaagaca gaagtgcctt agctaaagaa ctttgcaatc gttatgaagg  
74461 cataggtgca gatggcttta tagtgatfff gcctcatgaa aaatacgatt ttgaatggga  
74521 attttacaac aacgatggct caacagcttc aatgtgcgga aatggctcaa gagcagcagc  
74581 acattttgca caccatataa atggcatcaa gcctcatatg gcttttctta ccggagcagg  
74641 agttataaaa gcaaatggtg ataacaacag cgtagaagtt tctttgggca agataaaaaa  
74701 catacaagaa gccttttagt agtgcgaaaa aagctggcaa ctttgcgata caggagttcc  
74761 acatttgggtg catttttgtg aaaatftaga tgagtttgat cttaaagcttt gtaaacaat  
74821 gagagaaaaa tataatgcaa atgtgaatft tgtaaaagtt gaaaacgaca atactftaaa  
74881 agttcgcact tttgaaagag gcgtagaaga tgaaacgcaa gcatgtggca cgggcatggg  
74941 agcttgtttt tatcttgcat tcttaaaaaa aaaaatccac aatcaagcta gaatcatccc  
75001 aaaaagcggg gaagagctga gctftaaatt cgaaaatgaa gaattatftt ttaagggaaa  
75061 agtgagatat tgctftgaag cggattataa tftttcttag tftttatfta ctccctctft  
75121 ttggcgatag cgagctftaa aatggftttg gagaggagta ftataaaactc aatgtagaac  
75181 aaaaaagaca gatattfttt accaaaaatga atgcaatgtt tgataaaagt tftgaagaaa  
75241 tagctaaaga aagagcctft gtagaagctt tfttttatga tgtatataaa aatggactta  
75301 gacattcaaa ccaaagcaat ctagaaaagc tgatcgatct taaaaacaaa taccgcgttg  
75361 aaaaatctfta tgattfttaca gaatacaaaa aacgcattca aaaaattcca aatccatgg  
75421 gtatggccca agctftggct gaaagtcca caggaaccag tcgftttgca agagaggcaa  
75481 ataactfttt tggagaatgg acttggggag aaaaggctt aaccccgat ctaagacatc  
75541 ctgataaaaa acataaaatt agaatftttg atagcttgca agatagtgtg gattcttatg  
75601 tgctgaatft aatcgacac tftgcttatg aggaatftcg taataaaaga gctaaatftg  
75661 aaagcaagg caaagaaata acaggactag aggctatcaa aactfttagat tcttactccg  
75721 aacgcaagg ctattatct aatatcgfta ctaaaatcat ccaacgatac gatcttgagc  
75781 gatatgatgt ftcaaattct tfttagcctt agctaaaagc caagtgaaaa tftatcaaaa  
75841 ggcaaaactt caaatftcac cccttgctca aaaaagctat cttactcga aagagtgatg  
75901 aaaactacat gaaaaattcc aagttctaaa ctcttagaaa ggattftttt agcgcgcaat  
75961 ttgatcaagt ctatatcaa tgtcggactg gaaatatatg cgattftttga agccttgcta  
76021 taaaatgtaa aaaatfttatt gtaaaaaaat tcttgtftaa atftgaaaag ctcatftaaa  
76081 ataagatftt caaacaatg agtaaaatct tfttgtatgc atagattgtt tcttaagcca  
76141 aatctcttaa aataaattft ttgaagctft tfttcatcat ggcttatagg atgaatgata  
76201 taggtgtftt caagctctft tatgggtgta taaacgctat cfttagatgt tfttagctft  
76261 tftttaagct ctaaaaaag cftggaata ctgatttgct gtcctaaatt taaagctaga  
76321 tfttttaaaa tftcaagctc tagggtgttg aaatfttgct ftaaaagtat atfttttct  
76381 ctaattftac tacgcccact ttgcaaaaaa agtcccacta gattgtftat cggtaagftt  
76441 tfttactgta tactftacaa tctftcaaag tcaaaataat caagctcaag ctcttgaaat  
76501 cfttcgatat gcaaatctft tfttatctgta ctgatgatga taggaatftt aatatctftg  
76561 aatfttaagg caaatcaac attataaatg caaagaaatt ftatctgggc atfttttct  
76621 aaaaaatftg aaagatgtt taagctfttg tfttcaaac gagtatcata caaatftaaa  
76681 acaaaaatft cattgggtft aaattgggac aaatagfta aatcaaggt tfttttacca  
76741 ctaaatfttg gccctftgat gatgatatta caaaaaggaa tftgcacctt tctftcataa  
76801 cftgtftcaa atftgggatg atfttcataa aaaaattca atacctcaa atcttatct  
76861 tfttaaaaagg aaaattataa catatfttaa agctcatfta atcactaac atftggcaat  
76921 tftcacaat atataggcta tctfttaaca tagaaaata atfttataga catftaaaagt  
76981 ctatgttgat atfttagaga gttgattata tfttttgaat taaaatctca tfttftttta  
77041 caaggattat tatatctfta tfttactcaa gaatftttt atataaaaaa tcaacaatca  
77101 ctcttccatt tftatccaaa agacctgatt tfttatcaag tfttagctata gccaaacct  
77161 tataaaaatc ttcgacctca tcatacttag cftctataac ccaatfttca tftttatcta  
77221 tgaatccgta tfttttattt atcctagcca aagccaaacc tftcatgaaaa caaccacaaa  
77281 tattftctft agataacaac aaacataaac cacgctftga accaaacatt accatftcat  
77341 catctftatc atcgataaaa tcatatfttag cftttatgat gattfttct tftttatcta  
77401 caaatccca tftatcattt aaacaacag cggctacatt tctfttaaaa tctfttatag

77461 cttcaaattt agcttggatt acaaaatttc cttttttatc tataaagccc cacttgttat  
77521 cgattctaac ccctgctaga ctttgagaga aatccttaac ttcatacatat ttcatagcta  
77581 ttgctatctt tcctttttta tctacaaacc cccatttatac atttaaacaa acagcggcta  
77641 cattttcttt aaaattcttt atagcttcaa attttagcttg gattacaaaa tttccttttt  
77701 tatctatagc tccaaattta ccattaaatt taactatggc taaaccttgt gaaaaatcat  
77761 caaccaatc aaatntagca tctataatta attttccact tatatttgca aatcccattt  
77821 ttttatcgac cataacagcg attaaaccct catggaagtc tctatagttc aaatcatagg  
77881 gaaaatttat ttttacaata tttgctgttt tatctataaa actattttta tcggtattat  
77941 ttaatcttaa taagccatcg caaaaactac taccgatact cccgtccaat tcttttataa  
78001 atttattctc taaattaaat aaaattgttt taaaaacaaa ttgttcatat tggctatcac  
78061 ttaatttcaa atttatataa aatatttctc tttctttcaa tgcaccaaaa ttaagaaaat  
78121 ccatatcaat atttttatct aattttatac ttatttgatt catatattgt agttttaagt  
78181 tatattatat ataccgatta aaaaacaaaa tctaattccat agttaaacta tggattaact  
78241 cgctatttct tctaagtgtc ttaagatttt taccattgcc aaggatcaa gtttacaata  
78301 ctctaacaaa gcttggcgat aggctttttt atcatcttca ctcatatttt gcatagcttc  
78361 aaaactttgc atagcttcgc ttccattatg gattaaattc aaatctttat aggcttgttc  
78421 catatcagga attaaagcag gcaaaacttt ttttatagaa taactccctt gcattttata  
78481 atgatagtag tctttatttt gaaaaggaat cataagatcc ttgatatttt tttctatatt  
78541 tagcaaatgc tcgctaaatt caggaaaaac aagtgtctaa ttttttatca cacctctttc  
78601 aaagctggca ttataagcaa gtacgcaagc atcttttggg atatcgttaa tcaaattttt  
78661 tgcaagttca tatcttggat caacgccgca ttcacttaaa aattctttat gttctaattt  
78721 atctttataa tctatatgca aagagtattg aaaaggaatt tgcataataag gctttacacc  
78781 tttaaattca ggcacagctt gcataaatgt ttcaaagtct aaatgatata taggataagt  
78841 tagagtattt aaaaactctt tgattttttc cttattgata taaatttctt tattgagtga  
78901 agcttgaatt tgaatttggt gattttttat aaagacagat agatctttta tatctttaaa  
78961 actgattata tttttataat aaaactcgaa ttttttatta gaatttaatc ttgaaatatt  
79021 aaaaatacta tccttttcac ataaatttct ttgtttaatc cagcaatact catacccgctc  
79081 aactcataa ggatcaaac aatgtgttcc tatatctatg tttggttctt cttttttggt  
79141 taaaatatct tcaaaatatt ttaaattttc ttttaactgc tcttgttttt gaataatttc  
79201 atctgttatg tcgtttacct taaaaagttg atttatatca agaaaatcat ctctgtaata  
79261 ttcactattt aatgaatca gattaacttg cttgatttta taaccacaaat ttgataaaac  
79321 ataatactgc aaagaacaat catctatata aacatctttt aaggaagtgg aacttttaac  
79381 ttcattgata ataaatcctt ctttgggtatt ttgcaaaata tctaccataa tcaaaatacc  
79441 atcataacaa aaagtagctt cgtaaagac ttcttggtta tttccagca attgtttggg  
79501 ttgctcacat ttttcatcaa aagtactgcc ttcaaattct atttttactc catttgga  
79561 aagctcacag gtaactccc ctactttatc acctgcacta aatctagcca aggtattttc  
79621 atcaggcata cttaaacat cttttttata agtttgcaac caaagtgatt tggcacattg  
79681 cgcgcctctt gtgtattttg attttgaaaa aaacattatt tacctttctt tgtattta  
79741 ttaaatttta acctattttt atttaaaaac agtctattta gctattttta aaaggcttat  
79801 cttaattaa gttatagatc aatgtacttg agatagcaaa atgcactagt gaattttgct  
79861 tatcttcttt tctttcagct accgttttac cttcgccctt ttttatagcc caaaaagac  
79921 taagcccaaa ccacaatccc aatatgattt ttaaaggtaa tattaaaatt accaataaag  
79981 gattataacg attatctttg agtggttatat atgcaatgta tgataaaaca ctcatccata  
80041 taaaaccat gatacctagc gttattaaag taatacttct ttctacttgt aaaaaaaca  
80101 tagcaagaaa aattatccaa actatgggta gcgcagcaaa taatgcaaca cacaaactta  
80161 catctaaaag atttctatac actacaatcc tacccttgat accataaac acaagcacta  
80221 ttgcaatgac tatataaaca atagctgcta tgataatcac tgcgttagta tgatttttag  
80281 aatgtttgtg agttgtgtta ttatctatgg tttttctac tgctatatct tgctgtggta  
80341 tagcagagat tggtttggca cctataagat tgaacacat acataccaac atcgtaaagca  
80401 ttaaaattct tttttcatt tttttcctt gttttttatt tttatttgat aattatattt  
80461 tatatttatg gactatatat gtccatttta tttttttga tttcaatgtg attgaaaata  
80521 aaaaataagc tataatttca aaaaattaaa attaaagaaa ataatgagtg attttagaaaa  
80581 tagtttaaag ggttttaaag ataaagattt tggttattat tttggtaaag atgaaaaatg  
80641 ttatatttat cataactaat ttggcagaga aagaaatc gagattaatg aaagcaatga

80701 tattaaatcg aaatthagag agttgattga taacatttat aatgaaaata gggataaatt  
80761 taagggttta aaagaagctt ttaagaaata ttagacatt tatagtata aaagtactat  
80821 ccatatataa tttgataaaa atggagattt tttaaaaaca aaaagtgaga ttgtggacaa  
80881 ttttagcaaa acatthggca aagaaaaaat agacgagata ctttcgatc aaghtaattt  
80941 taaaaaagat atttttgaaa aatgggtggga taaaagtata aatagtgcta gaatgaaagg  
81001 taatgccaca aatttattaa aagataaaga taaattaatt aaaaatcttg aaaaaataaa  
81061 aaaagcagca gatgagagcg aaaatthaac aaaactattht gaaaaactta aagaagtaga  
81121 aggtatgaaa gctacagcca gagaattagc atatthtttg caatthtaata aagataaaga  
81181 taaatthcca cttgcaaatg acgctatgat aaatattgct aaatatactt ttgagatatt  
81241 aaatgaaaat ccaaccgaaa tatttgacag cagtttcgat aataaatgca aagaagaaat  
81301 atatthtgac gatgthtttg gaaaacttga aatagcaaat gataattht ctgaagaaat  
81361 aaaagaaaaa attgaacatc ttccaaagta ttatatccta gatcagthtt taaatthgat  
81421 cgataagata aaaaagtccg atthggcttht aattacaaaa gataaattag ctaaaaatga  
81481 tggaaagtaa gatataaagc aaagcgtgta ttataaactt tatcaagcag cttatgattt  
81541 tgcaaattht tgtggcaaaag cagatataaa aagcaatgat ttagaaggtht ttaaagagct  
81601 tttaaaaaca cataaaaaata tcatthttca tggaaatthct ggaactggaa aaacctatac  
81661 tatagtaaat aatataaaaa acatcattaa aaatgaaaat caaatgctca ttactcaatt  
81721 tcaccaagt tthttctatg aggtattht agagggtatt aaacctacag ggattgaaaa  
81781 tggacaatta aaacttgagc ttaaaaatgg aatthttaga gaatthtgta ataaagcaaa  
81841 agaagaagaa aaagagthtt tggcgagct agaaaaagga aatthtaatg aagctthtaag  
81901 cgattatggg tathttttca tagctgatga gattaaccgt gcggaattat ctgagthttt  
81961 tggagaatta ctttatgcac ttgagtatag aggagaaaaa ggcaagataa aaacacaata  
82021 tgcctctatg agaggcagtg aggtatthtt tgtgcctgaa aatgtattht tcttagggac  
82081 tatgaatgat ttagataaaa gcatagatag tthtgactta gcgcttagaa gacgcttht  
82141 atggcaagaa atgacatgtg attatgatgt aataaaaaat gaaatthtat caaaaaatat  
82201 cgaagaatac gcacaagcct gcaaaaaatt gaacgataaa attaaagata taggtgaaaa  
82261 atatcaactt gggcattctt atthttctaaa aatthgaattt aaagatgatg agatthaaaa  
82321 taacgatatg aaaaaactth ttagcaaccg tthtgaggcg cthttaaaag agtattthtaag  
82381 aagtgaatat agcgaaaaag acatacaaaa acactthgat gctthaaaag aactthttgt  
82441 tatagaaaaa tccaaagaaa caaaaacaaa tgaaaaaaac aataataata aaaacgactg  
82501 ataatagctt tatagaaata gatcaaaaat cthcaaaaat acaagattht gatctgtatt  
82561 ttgaagatth tataaaaaat ggaaatthct tthctthttt caatgatgat gaaaaattht  
82621 taagcaaaaa tgctaaaaat cctatcatat cggtaagaac aattgataaa gacaaaaagc  
82681 aatcactag tggaaattat ataggaaaaa tthtttatga taatthggaa gttgagataa  
82741 actctagatt tggcaagaag thcttagaaa gaatgtthaa tthtgctaag gatgtatthg  
82801 tcgatgatgt gagtattht caagatgtga aaaatgaaag caatataagc gagthttatc  
82861 tthtttacat cthttgtgcaa aaactthgaa aaagthtttt gataggtthg cthaaaaact  
82921 atcaaagtaa aaaatacaac gactthcgtht ttaaaggaaa tatcgatag gttgaattht  
82981 taaaacacaa tatcccttht aaagcaagg ttgctacaaa aacaagagag caaatagaag  
83041 atgtcatat cataaatgtg cthtacaagg cthtacaagt catagaaaag aaaaattcaa  
83101 gctthttgaa aatgtaag catataaaaa cctatthtagt gcaaaaataa agcgagcatt  
83161 gctthtataa agaaagthtt aataaagcct thttctagtaa agccttgaga aatcaaaact  
83221 atcaaaacta caaagagctt ttaaaatag caaaaatgat catagaaagc gaaaatthca  
83281 ctgcaaaaaa taaaaatgat caaaaagct atagthttat catcaatata gcagaacttht  
83341 ttgaaattht tataagcaag cthtttaagaa ataatthcga agaatacatg cthgattctc  
83401 caaaactthg aatthtataa aatagcttht ataaacgcta tataatacc gatattgtht  
83461 tatctaaaga tgataattat atagtctthg atactaaata taaaaaatg acaatggaag  
83521 gtaaaagcca aaatggcatg ggagatthtag acagaaatga cthgtthcaa atctatact  
83581 atatgggata ttatcaaaag ataggcaaaag tactthtagg cgggctthtt tatctatgc  
83641 aaaatthta cgaagaaaaa tgccatagtg aaaatthctat cthttcagat gagtatcaat  
83701 ttatagthtga tggaaattht cthgaagatg atcaaaatc agataaagaa atcactcttg  
83761 agtatatcat ccaaaaagaa gagcaattht taaaaaggat aaaaaagcta ctaaaataat  
83821 cthtttagtag cthtataaaag aaatthttct thctgtattht tcatgagtga tagagtctat  
83881 thctagctta tagggtthta aatthttctg gctaatgtht gcaaaataaga tatctaaact

83941 cacatctaaa agcttcttta agccttttga aaaatcataa tcctttaaat aaaaattatt  
84001 ttttatcaaa ttttcatttt gttttaaaat ttctagcaat tcttgttctt ttatgcaaaa  
84061 caatccttct ataagtatat tttgataagg tgaaatatca ttaatgttta ataccttttc  
84121 atctatccaa cccttttttag gaaaagcata tgcacttgca agatgataaa gcttattctt  
84181 ggtatctgct tcttttgatt tatagtgaat ttttgatta tgtttataa aatcaacaac  
84241 acaaaaatat ttaaaatcac cataagtttg acttaagaaa ttttcaaag atataagctt  
84301 gctttgaaca tttatatcca aaaaatgtcc attttctaaa tgataacttt ggcttagcaa  
84361 ttgtacattt ttaatgcttt gaatttgtgc ttgaaatttt agccccttat cgctattttc  
84421 acatagtacc tgaatgtcct cttttgcttt aacatcatta aatccaaaca caaagctttt  
84481 gtgtcccctt cttggaagt ccatattcat aaatttatcc tttttatata aatcctatat  
84541 tgatttcatt atcatttcat ttttaactttg actcatttta taatttttgc aagcaaatct  
84601 tcagcagtat gagttaagat atgtttcatg gtattaaaca tttttaatcc tttatgagtc  
84661 atctacaaga atgataacta aaacatatag acattaatag tccatatttt tghtagtataa  
84721 tttcaaaaat cattccaaag gtttaaaaat gcaagatttc attgaagagt tattaaaagt  
84781 tagcgaaca tttaaaaaca atgccaaaaa aggtatgagc gatatcaata tttttgaggc  
84841 tttgggtggt gagtataagg aaaattatca ttctaaattt atagcttatt taatcaatcc  
84901 acatgctgat cattaccaag aactttttgc aaatgagttt ttaaaaaagc tcggagaaag  
84961 cgtacaggct agtaatttca aagaacttac agttcaagat atagaaagtg tagaaacaga  
85021 agcttgctg aaagataata gaaggatcga tatactcata agtttaaaag acaaaagata  
85081 tatcatcata gaaaacaac tttatgcaaa agatcaaaaa aatcaactca aagattatat  
85141 aaaccatttg aaaaataaaa taaaagcat agataatttt catgaaaata tacttactat  
85201 ttatttacat atggatgaaa atacagagcc tagtcagatc agtttaggtg taaaaatgg  
85261 gtttaagata caaaataact ttatacacga tagcagtaat aaaacaatga gttattattt  
85321 taaaatggat tataagtgga ttaaagaatg gataaattta tgtatcagca cttgcaaaga  
85381 taaatttgaa aaaaatgaga ttgaaaaaga ttttaagaa gatatggaaa atgtgatttt  
85441 taccctaac caatacaaaa ctcttttaa atggtatctt acagacgaat ttgaagctaa  
85501 agatgatgta ttaaaatttt taaaagaaa tttagaaaag actatgactt tatacaata  
85561 cacaaaaaat aaaaatgatt ttaaagatat agaatatgat aaatacagaa aagcaaaaga  
85621 tatcgtaaaa gataaatggg atgagctatg taaagaacta gtaagcaaat tctttcatga  
85681 attaaaagaa aaatttgaaa aagcacaatc cataaataag catggacaat ggcttggatg  
85741 tgaacttgat gaaaatagat ttaattatga ttggtttgat ttttatcctg aaatttataa  
85801 agatgaggat gatgtatggc caagcatagg tgtttatttt ggaaaaagca agtataatca  
85861 ttttgggtta acctttaa aaactatct tgaaggggat gagaagtata aacaatgtat  
85921 aaattgtttt caagaattaa ctggaaaaa tactgacaat atccgcagac ataacgagca  
85981 ttattattgt gataaatttg agaattttag taattcaaaa gaagaatatg cttttatata  
86041 ttggctaata aataatcatg gtgattggac agcagaattt tccaaaattt tagaagaatt  
86101 tctaaacaag gaaactataa aaagcgcttt agaagaaatc aatgaaattt taaaaccgag  
86161 caaataggca atttatttgc ttatttgcctc aagataatcc ttaaccactt ctttgacttt  
86221 atctgctata aaatcgggct ccaaaacctt tatataaggt atataataat acaccaagg  
86281 taaaatttcc atttcatgat tgatttcaag ttctatttct atagaacat ctttgtcttt  
86341 accggtgata atttgcgaat ttaaaggttt tctttcaaaa tattttctca caggctcttc  
86401 caccaaaagc cttactacaa aaggcttatc aagactaac catatagaat taacctttcg  
86461 aagtcttgct tctaaaattt catcagtttg aaaagattct tgagttagga tgatattttg  
86521 tatatttttc aaataaaatt ttttaaaaat atctcttttt ttcatatcaa aggcaagtaa  
86581 atacaaaat ccactaaaaa aagcaagctt taaaggcttt acttgaaaaa gcttattttc  
86641 atacttaaaa acaatttgcg ttttggctact aatagcttgt tcaagaattt gaaaatgatt  
86701 caagtctttt tcttctaatt tttcagcatc taagctagta tgaataggat tagaaatatt  
86761 ttgagaaaat cgagaaagca aaggatgagc cttagcgtaa aaactacttc cagcactttt  
86821 tgccatagta tcaagcactt caaggatgat tttatcatct tgtttttgtg tatctttact  
86881 tgtatcaatg taccattttt taccattttt aacaagtccc ataggctcta aaacctcttg  
86941 catatctctt tttatggttt tagtgcttac attaagttct tgagctaatt cttttatcgt  
87001 gatcccgttt tcggatttga ctaatctatc gtataaaatt tcaaggcgtg ttagtttaga  
87061 attggcaata tattttttaa aatctttcaa agtttttctc tacaattttt aaaaatattaa  
87121 caaaaattat tttataaata aataaagcca aagtaagaca ataagaatgt ttactcttgt

87181 ttttactagt tttaatccat tcttttaaaa tataagaaag aaaaatttac aacaatattt  
87241 tgatattaag aatattttatt gcggttaaat taagataata gagaaaacaa gaaattttat  
87301 tttaaatcat aaaggggcaa aaagcccctt gaaattacat ttggcaagta ttttgcaaag  
87361 ctgaagaaag catccaaagg cttttttcgt attttgctat attttcttga gcaaaagcag  
87421 ctgtagtagt atcgctagct ttttcagcct cctcgtttaa ttttttaaat tctgccaaaa  
87481 ggtattcata atcttttttg atcaattcca tcacttcaac tggagtghaa caatcttttt  
87541 ctacttttgg actttttgca ttttccatta aagttttttg gcaagtghaa gctttttcac  
87601 caagttghaa agctctttct gcacaatcat caaaaagttc tgccatttct tcataagcct  
87661 tttcagtggt ctcatgaatt gaataaaact gtaaaccctt aacattccaa tgataattgt  
87721 gaaatttaac ccataaatga tgagcatctg cttgcatttg taataattgt tttgttactg  
87781 acatgttaac tccttttttt taatttttaa aattataaca aaaaattctt aaataataat  
87841 tattattagt taaaaatttt tattattaat tttacttatt tctattatac tctttttatt  
87901 taaaatttac tatgatttta aatatttttt taaaatcaac ttccaacct caaccagg  
87961 ctgatcataa gtattaattc ctgacattac cccacaagcc gaagtaaaaa gctcataata  
88021 atacatcaaa tatcccgcac gccacgcac taatttttca agttctatta tatcgacact  
88081 caaattttca gcgatcaaag catgcattgt cgcacgcac tgagcattta aaagatcgtg  
88141 caaattgact ttattgctca aatcatctaa aaatttaaaa tggatatcgg gtataaccgg  
88201 agccttttgg ccaccttga ttttttaaaa agtaatagtt ttgttttttg gcccatccat  
88261 aatgagttgt aaaaagctgt gctgatccct tgctcctata agagcgatag gggttaaac  
88321 tatgctgcta tagccttgtt ttttgcccaa actttcagca ataagctgga tataaccattc  
88381 attaaaacc ttaaaagcat cgctataaga aaaaagtaca ttgatatttg cacttttgtg  
88441 agtacaataa tgataagcct tttgtaaaat ctcatctttt ttatgtatga aaaaatcctc  
88501 aaagcagct ttagctcctt ctaaaagagc tttagcatta taaccacaaa acaaaagtg  
88561 cactataacc acagctghaa gtatgctaaa acgcccctct acatttgcag ggataaaaa  
88621 gcatttaatg ctaaaatttt caccctctt atgcagttta gaatctttat ctgtgatghaa  
88681 acaaagtat ttttttaatt cttgcatatc aagcttaaaa tgttcaataa gaagcttaaa  
88741 aagcgatact acttctatgg tactacctgt tttactgatg attaaaaaca aactttcttc  
88801 aagcttgatt ttttctaaag tcttattaaa agaatgchaa ctggtattat caagtataaa  
88861 aagttctctt tgattacttt tttcatcaaa aagcatatca cgcagagcct taacgccaca  
88921 acttgagcca cccataccca ctaaaacgat attttttata tgttctttat cttgaatghaa  
88981 atttaagctc tcatctatta aagttaaact tgtatcgata agatghaat accctacatc  
89041 tccactttct acttcatcat tgatacgatt tgcataagaa cttatagcgt gaatttact  
89101 ttttttaaaa aaaagagtat tatttaacat ttacttttct cataaaaaata atttgtcgc  
89161 tctacaaaac cctctacgct tccgcaatca aagcgttttc ctttaaattt ataagctaaa  
89221 accataccat tggttgcttg ggttaaaagc gcatctgtga gttgaatttc tccatttttt  
89281 cccgcttttag tattttctaa aattccaaaa atatcagggg ttaaaatata tcttcctatg  
89341 atagcaagat tacttggagc ttcttgagga gatgggtttt ctatcattga atttaccatg  
89401 attaaatcct ctctacaaa atttcctgca atcactccat aacttgatac ttgctctttt  
89461 gggacttcca taacagctat gatggtacaa cgatattttt cataaatttt aaccatttgt  
89521 gccattacat taacaccttc ttcattgatg cacaaatcat cagccaaaat cacacaaag  
89581 gcttcatctc ctgctaaagg cttgcccttt aatactgcat cgccaagccc gcgcatttca  
89641 ttttgccttg taaaagghaa agtacaacga tggattaaag agcggatatc ttttaacaaa  
89701 tactctttat ttgtaccga aatttgatgc tcaagctcat aagaaatatc aaaataatcc  
89761 tccaaagctc tttttccacg acctghaa aaaccatata tatccatacc tgcttctaaa  
89821 gcctcatcca ctccataatg aatcaaaggt ttgghaaagta taggcaacat ctctttagg  
89881 aaagctttgg ttgcgggtag aaacctagtc ccatatcctg ctgcaggghaa aatacaagtt  
89941 tgaagcataa ttatccttta tttgtttttg gtattataac caaaaactac aatttttaaa  
90001 taaatcaaaa ctaagtttaa cgtattttaaa aataaggghaa aggatttttt gccttattga  
90061 attcctggtt tagctgcatc aataatgctt tgaactacc ctgaatctc aagagttghaa  
90121 atatcttgtt ttaattcctc gccccttgct atggttctta aaattcttct catgatctta  
90181 ccacttcttg ttttagghaa gcctgtagta taaagaattt tttcagctt agctataggc  
90241 ccaatctctg ctcttaagat atcatttaat tcttttaagg tttctatagc cctcctaaa  
90301 tcacaacttg aagttggatt taaaaccaca aaggghaa aagactcacc cttaatcghaa  
90361 tcaagcacac ttacaactgc tgattctgcc acacttggat gcttggcaat agcactttct

90421 atttcagctg ttcctatgcg gtgcccagca acatttacca catcatcagt tcttcctgtg  
90481 atagtaatat aaccattatc atcataaaaa gccccatctc cactaaaata aaccggcttt  
90541 ccttcctttt ttgcttgcgaa aaaataactt tctatatagc ggttttcctc tcccaaatt  
90601 ccacgaatca ttgaaggcca aggcttggtg atacaaagta aaccatcttc ggctacatct  
90661 tttacattgc cctcctcatc gataacctcg gcaaaaattc ctggcaaagg caaggtagca  
90721 caacctgggt ttaaaggagt agctccaggc aaagggtgta tcatatgccc tcctgtttca  
90781 gtttgccacc aagtatcaac gatggagcat tttgaatttc ctatattttc ataaaaccac  
90841 tgccaagcgc taggattgat aggctctcca acagttccaa gcacttcaag agtgtttaaa  
90901 tcatattttt taggctcatc aggagcatct gcatgaagca ttcttatagc agtaggcgaa  
90961 gtataaaatt tgctcacttg atactcttct atcattctcc accaacgccc tgaatttggg  
91021 taagtaggag ttccttcatg cataatagta gtcgctccac atgctaaagg gccataaaca  
91081 acataagtat gccctgtgat ccaaccaca tccgcactac accaataatt atcataatct  
91141 tttatatcaa atacccattc catagtcatt tgcgcccaca gtatataacc tgcacttgca  
91201 tgcattactc cttttggctt acctgtagaa cctgaagtat aaagtaaaaa taacaaatct  
91261 tcaactatcca taatttcggg ctgcatttta taagattcat tttttactag ctcatatag  
91321 acataatctc ttccttttat gtattctata ggctcattat tgcgtataac tataagcact  
91381 ttttctacac tttcacaacc ctcaactaaa gccttatcaa cagcagggtt taacataata  
91441 ggcttgccac gacgaaaagc cccatcggca gtaactacaa gtttggcccc tgcactatg  
91501 attctatctc ttaaagcttc aggtgaaaag ccccaaata ccacactatg gatagctcca  
91561 attcttgcac aagctagcat gataatagct gtttctggaa tcataggcat ataaattata  
91621 actctatcgc cttttttaac accaaagcgt ttaagcaaat ttgctgcttt acaacttca  
91681 tgcaataatc tacgataagt ataaacctca taatcaccca tttctcctc aaaaacaata  
91741 gctgctttgt tgcgtcttgt tttcatatgg cgatctaaac actgatagct tacatttaaa  
91801 gttccaccct caaaccattt ataaaatgga gctttatcat catttaaac acgagaaaaa  
91861 ggcgaaaacc aatcaatttt ttcaagagct tgccttttcc aaaagcctc gaaatcttc  
91921 cttacctcgt cgataaatc ataatttca cataaatttt ttattcttgc attgagagaa  
91981 agttgtttgt taggttttaa aagtccttga gtattttgat aacgcatgaa cactccttct  
92041 ttaagttatt tataaacatt atataagact ttttttgtgt tttatacaaa tttaaaata  
92101 ataatgaag aaaattacaa aaatgtgaat atttgtaata aattaaagaa aacatttcta  
92161 aattatggtt atttaagaaa caaatagcct cttcattaaa agctaagcaa agttcttgat  
92221 acaagcttag tttttcttgt ttaaactgct ttgattctag agcaaattct aaaattttgc  
92281 tcccgcttcc tactctgata aaaacaaatt cttttcttgt tctaagtgtc atgatgatac  
92341 atttttgaag tataaaatca aatgtttgtt tggaaaaatc atcaggatat aaaaaagaaa  
92401 ttttataagg atcgatagct attttgtttg aaatttcatc tttgtaata tagttttac  
92461 acatactaaa atctacaaaa ttactaaaat tcacaccttt attttcaagt tcaaaaatat  
92521 ttgtattttc aaattctaaa atttctcctg cgtgtaata atactttttt tgcgccaag  
92581 agtctaagaa atttttatca tgactagcaa ttaaaaaacc gcttttatat gtcttttgca  
92641 tatataaaat agctttttta aacaatatca tcgtatcttt atccaaaaaa gcactcggct  
92701 catcaagcaa ataatactta gctctagcgc ttaaagccaa agcaaattgt atcttttgcc  
92761 cttgcccaga tgaaagctcg ctaggatatt ttttaacaa acttctatca atttcaagca  
92821 aatttaaac ctcttcaagg cgttttttaa tttctttgct gtctaattta taagttttta  
92881 acaaaaaata aaaatttttt tctacactgc gatttaaaaa aacaggctcg ggaaatagta  
92941 agtaaatttg gcgtttttca tctgaattta aatgcttatt tccaaaataa gtgatattat  
93001 caaattctcc ttcaagaaat ttcagcactc ttaaaagtgt agattttccg cttccatttg  
93061 aaccatttaa aatactgatt ttatcagtat ctaagcataa gtgtttaata tttaaaatat  
93121 tttttgttcc ataattaaat ttaaaattac aaagttctat catctaatat cttttgagtt  
93181 tatgtataat aaaatttaaa ataaaagcga tgaaaatcaa cactaaagca agagcgatac  
93241 cactagcaaa ttcgcctttg ttggtttcaa gagaaatggc tgtggtgatg gttcttgtgt  
93301 cgtatttgat atttccacc actatcatcg ctactccgac ttcagcaact atcctaccat  
93361 aagctaaggc cacaacgctt acaagagcga agcgcaattc ataaatgata gtcattacaa  
93421 gttttaaagg acttaaatgt aaagatttga taagtaaaaa atgcttttta ttcattttt  
93481 ctatcaaatt agaaaaaagt gcgataacga taggaagcgc taaaacaaat tgccctaaaa  
93541 tcaatgcttt tacagtaaaa agcaagccta aatcccccga ggggcccctg cttgaaatca  
93601 aagcataaag tataagccca accgcgaccg taggaaaaga aaggctggta tcgactataa

93661 gttttataaa acgcttcatt ttaaattcaa aaaaacctaa agcaaaaccc aagggaaacc  
93721 ctacaatcaa ggataaaacg atggaaatgc tggagctaaa aagtgttggt ttgattgcag  
93781 aaataacgct ttcatcagca ttgaaaagta aaaatagagc ttgagcaaag ctttctaaga  
93841 tataatccaa aaagtttctt tttttaaat aagtaatfff agcataatta tgctaaaata  
93901 tttttttaag taaaatttta actaggagac aaaatgaaaa aaattatffc tttagctcct  
93961 gctttagccc taagcgcaag cgcagcagaa cttagaatgg caactacaac aagcaccgat  
94021 aatacagggc ttttagatgc tttaaaacca ctctatgaaa aagaaagtgg caatacctta  
94081 aaatgggttg cagtaggaac gggtgcagct ttaaaaatgg gcgaagattg caatgctgat  
94141 gtgctttttg tgcattctcc aaaagcggaa aaagactttg taagtaaagg ttttggtgta  
94201 gatagaacgc ctgtaatgta taatgatttt atcattatcg cggataaatc tttagctcct  
94261 aaatttaaag ataagaatff aaaagaaagc ttagagctta tcaaaaatga aaaacttact  
94321 ttcatttcaa gaggcgataa atcaggcact gataacaaag aaaaagctct ttggaaagat  
94381 cttggcggcg tgcctgaaaa agaaagctgg tatcaacaaa gcggacaagg aatgctagca  
94441 agtatcaaaa tcgcagaaga aaaaaagggt gtgatcttaa ctgatcgtgg cacttatatc  
94501 aaatacgaag ctaatgaaaa aggcaatcct aatttagtga tcgtaaatag aggcgatgac  
94561 aatcttaaaa atttctactc tataatcgct acaaatccaa aacattgtaa aaatgtaaat  
94621 tacacagagg ctagcaaatt tatcaaatgg gtaacaagcg ataagactff aaatffcac  
94681 agtgaattta aacttcttaa caaacctttg tttatagtgg atgcaaaaac aagaaaagat  
94741 taaaaattat ttctaagcaa agagctgatt tctaagctff ttgctttatt ttgaagtaag  
94801 atttcttcta aaatctctaa attctttggc gaaagaaatt caagaagffc taagaggttg  
94861 ctataatfff ggtgagaagc tttatffcta taaagtttat ggacaatfff caaatffct  
94921 tcttttttat tactaaaaag ctcttgctca aaaaccctta aagcatcagc gataaaaggt  
94981 atcatatctg ctttgatgfc gatattacca tttaaagtaag catagatact tgaaagcgta  
95041 ggaatffcac ctgttttatt tgcctctcatt cctaaatffa tcaagcgatt agccaatffc  
95101 ttttgctga ttttttttc ttttaaaatt tcatatffc tatcgacaac tffcattfff  
95161 ctactfftaa tatatagfff atctgtaatt ttaagctagt ttattatfft aaaagtataa  
95221 tttaaagtatt gattatctat aatffttatag tttffcaata aaaattagga gttaaatffg  
95281 gcaaaattat ctatcatcat ccctffttggc acaagcaaaag agcgtcctta tattaagaa  
95341 aggggtggcaa ataaggcaaa cgaatataaa agtgatgatt tagtagagta tttffttgta  
95401 gaaggttfff cttccttaga acacttggag cttaaaaatc ttattgaaaa caaaggacat  
95461 cgttatffta aagatgcaac gcaacaatff aataaggctt tttcgctagg acaatgtaga  
95521 aatfftaggta ttgttaatgc aaaaagcgat gtagtgatgt ctctggatgt tgattgcgtg  
95581 ataagcgaaa aaaatfftaga aaatatffta gaattgatca gtataaaaga aatagataaa  
95641 aatcctaag cttffttgggt tttacctgt atatffttaa atgaatffgg cactgaatff  
95701 ttacaaagat ataaactffc tttgtgggat aatatcatta tacatgatat gaatffttgat  
95761 cgcaaatffa tcaaatffct taccctgct tcaagtacca ttataatgaa tcgttfftaa  
95821 ttcttagaac ttggcggaaa tgatcaagaa tttgtgggac atggttatga agatffttgat  
95881 ctaatgatgc gaatfftaaa aaattgcacc gatffttgaag caatacctac taatfftagaa  
95941 tttgattata gaaattggag ttttaatgat tataaagggt tttagagctff atfftcagtg  
96001 gttggaaatg aagcttgcgt gcatggaatt tatctffatc atctffggca cgctgaacc  
96061 aatcaaaatg gatatttaga taatagggaa ctcaaccatc aaaaatffc tcaaaagctt  
96121 aaaaattata aagatatfff tgatggtccc gatactffaa tagaaaatga agccaaaaat  
96181 cgcaatgctt tagtatfftt tcagcaaaac tcaaatffat atagtagttt gcgagcaatc  
96241 atgccttatt ttgaaaaact tattfcagct aaagaatact atffttffga tgaaaaagat  
96301 aaatffaatt ctaaaaatff tttaaaatff tatcatcaaa ataatattac acatatcatt  
96361 tttccaaatt ctcatgcaa tgaaaaaaga cttgaaatff tccaatffat aagagaaaaa  
96421 aaattgcctt ttattgtffa tgacaggggc gctffacctg atctffggtt ttttgatgac  
96481 aaaggttffa attatgattc tacttcttac gacgaaaaaa attggaacaa aaccttaaat  
96541 gaagaacaaa aaatcaagac acttacttat atagaagaag ttttaaaagg gaaaaatff  
96601 ttagaaaagc aaggactaag caagggaagt gataatctaa aacgaaaatf aggccttaaga  
96661 cataaaaaga tttctffttg acctfftcag gtgaaagatg actctgtgct taaaaatff  
96721 acttatgagc catfftcata tgagaatfff ttgaaatff taaacgaact tgcaaaaaag  
96781 ctatfftatag aaaaatffgt tttgtffgtt aaaaaacatc ccctaagffc tgactfftagat  
96841 aaaacaactt atgataatff aatffttgta cctgatgata caaatfftaa cgatctffta

96901 gggctttgta atgcggtttt gactttaaat tctggagttg gtgtttatgc aattttagct  
96961 aaaaaacctt gtatagtctg cgcaaatgca ttttaccgat ttgataatct taatttacaa  
97021 gcaaataacg aaaaggagct ttttgagcat attttaaaaca tatctcaagg aaattttaat  
97081 tttaatgaag aaaaagcttt aaggtttata cactatctga gatatgaatt ttatagcttt  
97141 gggaaaagct attacaaaaa aagtggaggaa aatggacgca tttatactaa agtttataaa  
97201 atagaatttt attcctttaa actttttgga aaaaaactcc ttgattttaa tagcataaaa  
97261 aaacaaaatt ataaacttaa ttctcctatt tataaacctt atatttatga aattaaggag  
97321 aaaaaattaa aaagagatct caagggtaat ggtttaatta ttgctacaca agctaaaatt  
97381 tcacatttca aattttacag actttttaga aaattcatca ctagcccaa agatttcatc  
97441 atggatagta aaaaacctt tatgaaacct ataaaaattaa ttttaaggaa ggctttatga  
97501 aatattcttt aggaatttta cttgctgcca ctaaagacag cgcttttact ataggaactt  
97561 tacttataaa tatcaaagat aaaatggata tttcgcaaac gatattttat attatcaatg  
97621 atggtttttag ccaaacgat aatccatca tgcaagaact tgtacctaat attaaattta  
97681 taaattttac aatagatgat tttgagacaa acattagaaa atttaatgct gattttaaac  
97741 tcgataaaca aaatcctata ttaaactgct ataccacat gacttatgca aggtttgaag  
97801 ctttaaaatt tttggaagaa tgtgaaaata ttatttatct tgattttgat atgcttttgc  
97861 ttaaaggcat tgatgagtta aaagaaataa aaaataagggt ttatgaaatc gctttgttta  
97921 gaggttctgc cacgatgagt atgggggggg gtcagcttac tcctatacaa ttcactcaca  
97981 ccaataatta ttcagcaggt attattgtct ttaacgataa tcttaaaagt tctcaaaaat  
98041 tttatgactt tatttatcaa tttatcgcta aaaatgaaga ttattttctt gaagtcaagc  
98101 ttggtgatca gtttttattc tctttatact tactagaaaa aggttttaaa atttatgaat  
98161 taaatgataa ttattatggc aatatttctt gggtaaaaag caaagatgct tctattttac  
98221 atgcttgggg gcaaaacaat cgtttttggga ataacaaact ttgtgccctt gcttggcctt  
98281 cttggaatgt gtattatcaa aaatggttaa gtttgggagg aagtgcttat gaaaaagggt  
98341 ttgtaagctt tttagaagtt ccgcaaagcg ggggagaagt ttttcaatat tttgaaagaa  
98401 ttgtcctagc taaaagaatt tctcaaatta aattagaaaa gcaagaatta attatcgata  
98461 tcgacttttag taaaaaatc aaatttcatc ttgctttcat taaaaatctt gtcttttatg  
98521 tgtattcaaa atcaattttt actttttatac tagaatgtga atttcaagggt aaaattacac  
98581 aaagtattac tataaaaaga cctgaacttg aaaacgcttt aaaagaattt atcactagta  
98641 atttaataaa ataccaaatt taagcaagga atttccttgc ttaaaaactc attttatctt  
98701 ttttcatttt aaatacagta atgatgaaaa agataatata aagtatatct gcataaaaaca  
98761 taaaagctaa gatgttttca gaatataatt taaaatcaaa ttcaaaaaaa taaatgatat  
98821 taaaaatttc aggtaatgtg gatgcaataa aagataaaga ggctatttta aaaagattaa  
98881 tatgaattat cttgcttagt ttttaataaaa ataaaacaac aaaaatacat tttataggag  
98941 ctataatacc ctaagaatac taaaatcatc accgataaag acaaaaaaat gcaaggaaaa  
99001 taaatccata attaaaacga aaataaaaac cgcataaata gaaaaaaatc ctaacacaaa  
99061 atacaaagtt aaaatccatt tttttgtatt cttgcaaaat aaaatcgtag ctataaaacc  
99121 caaaatcaac gaaataaccg tcaccaaaat ttgagcagta gaataaatat caaaaaaact  
99181 ttcatcctta aaataaaatt ccaagagaaa gcttcctaaa tatagcacca aaattaaaat  
99241 tcctgcactt ataaaaagt tttttacaag atttaaattg cttttataag tttgatatga  
99301 ttttaaagtt tgaggaatth cgctggataa ttcttghtaat tctaccaag ctacaacata  
99361 aaaaatcata ccaataataa gcaatactat gcctatcatt atacctatca taatgggtgt  
99421 aaataaaatt cctataaaca aacacaaaaa ggcattgata aaatactttt gcttagtcac  
99481 tctcgctaatt tcataataaa aatttttaag agctaaaaaa atgatacaca taaaagtata  
99541 gaaataagtt aataaaagca aagcattagc taaattttt tctgatctaa aaaaataatg  
99601 attttccatg aaattaagat ttaaaaaaag ccctatggat aatacaatat tgacaaaaaa  
99661 acaataaaaa tattcacaaa tttactaatt tcatatttat tacaatttgt aataaagttt  
99721 atattttttg taaaatttgc attttttaaa aggatatcat tcttagccta attaaaaaaa  
99781 agatacaata aaagttaaga ttatattaaa caaataagggt aaaaaatggt taaggtagat  
99841 ttaaatagtg atctaggaga aagctttggc gcctataaaa tgggtatgga tgaagaaatt  
99901 ttaaaatttg ttagctctgc aaatgtcgct tgcggatttc atgcaggcga tccttgcgtg  
99961 atggataaaa ccttaaattt agccaagcaa aataatgttt gtataggagc acaccatct  
100021 taccctgatc ttttgggttt tggaagacgc aatatgcaag taagctttga agaagctaaa  
100081 aattatgctt tatatcaatt gggagcttta tttgcttttg ccaaagcaaa aggtatgaaa



100141 atacaacatt ttaaagccca tgggtgcactt tataatatgg ctgcaataga tgaaaatcta  
100201 gctctagcac tttgtgaagc agtggctagt tttgatgaaa gtatcatttt cttaggactt  
100261 agtaattctg ctatgaatga agctgcaaag aaaaagggat taaaatacgc aaacgaagtc  
100321 tttgctgatc gtgcttataa tgatgatggg actttggttt caagaaagct tgaagggtcg  
100381 gtaatcacag atgaagattt agcgataaaa cgcgtgataa aatgataaaa agaaagcaag  
100441 gttacaagca taaatggcaa agaagttgat taaaagctg atagtatttg cgtgcatgga  
100501 gatggcataa aagcattaga atttgttaaa aaaatcaaag aaaatttaac aaaagaacaa  
100561 attcaaataa aagccttaaa tgattttata aattaaaac tacaagaaag gataaaaatg  
100621 ataaacaaa ccgctctttt gggcgctgct tttttgatgg caacctctgc cattggccct  
100681 ggatttttaa cccaacagc aacatttaca ggaagcttgt tggctagttt tggttttgta  
100741 atacttgttt ctattatfff ggatatagga gcacaactta atatttggcg cattataggg  
100801 ataagcggaa aaagaggaac tgaagtagcc aatattggttt tacctaattt gggctatfff  
100861 gtagcttttt taattgcact aggtggcttt ttctttaata taggaaacat agcaggagct  
100921 ggacttggat taaatatagt attaggcatt agcgtagaaa acgcagcaat tattagcgcc  
100981 attattgcta ttggattttt tatctttaa aaagctgggg aattgatgga taaattcatc  
101041 gtttttagcag gttttgtgat gattgtcctt actgcttatg tagcctttgc ttcaaacct  
101101 cctattggcg aagctctttt tagaaccttt atacctacac aaattgatgt tatttctata  
101161 gtaaccttag taggcggaac ggtaggtgga tacatagtat tttcaggcgc gcacagactt  
101221 atagatgcaa agctttatgg aaaagaaaat taaactata ttaataaagc cgcagtaagc  
101281 ggaatcatta tcacaggaat catgcgtgtg attttatttt tagcagtttt aggggtagtt  
101341 agctctgggt tcatactgga taaagaaaat cctgctgggt cagtatttca tcatgcttta  
101401 ggagatttgg gcttaaaaat ctttggcata gtgctctttt tagctgctat tcatcagtt  
101461 attggagctg cttacacttc tgtatctttt ataagatctt ttcaccttg gattgaaaaa  
101521 tataaccgct ttgtggtaat ttttttcatt attgtttcaa ctttagtttt ttatatactt  
101581 ggaaaatctc ctgcaagtat ataatcatc gttggaacaa tcaatggttg gattttacct  
101641 attaccctat ttataatgat aattgcagca cataaaaaaa gcatagtttg ggactataaa  
101701 catcctaaat ggatgagtgc ttttggactt ttgatcgtgg ctttaatgtc ttatttatct  
101761 atactttcta tgataaagtt aatataaaat gtttagcata ctttttagtg gaagcaaagc  
101821 agtgcttttg cgctttaaac aagaaatffc gcctcaaac aacgcttttg ttttaagcac  
101881 tgaggctaga attcaaaaag gtataaatga aaatgaaatt tatggcatag atgagcttgt  
101941 aagtgcctat tctagcttgc ttatttattt taatccttgc gtattatcct tgaattcttt  
102001 actcgatttt ttagaaaaaa tcaaaaaaga tattaataaa acggataaaa aatccaatct  
102061 ttgtatcgaa gttccacttt gttatgatga agaatttggg cttgatttag aatttgtatg  
102121 caaatatcat aatctttcca aggaagaatt gataaatctt catacaaagc cctattatct  
102181 tgtttttatg ctaggattta tggccggttt tccttatctt ggaggacttg atgaaagact  
102241 ttttacccca agactcgcaa gccctagaac caaaattgag gcaggaagtg taggtattgc  
102301 cgataagcaa acaggagttt atccgatttc aagcccaggc ggttggcaaa tcattgctag  
102361 aactccttta gaatttttca ataaagaaga cgagaaaaat cctacacttt taaaagcagg  
102421 aatgttttta aaattttaaag ccatttcaaa agatgaattt tacgatatta aagaacaggt  
102481 tttaaaaaag gtctatcaaa aggaaatffa tgagtataaa agtcattgaa gcttctataa  
102541 attccacat acaagatctt gggcgtaaaa attatgctaa attaggcata gcaagaagcg  
102601 gtgtgatgga tgaactttct ttaaggattg caaatatctt acttggaaat aaacaagatg  
102661 aagcaggact tgagctttgt ttaaaaggtg gaaaatacga attttttagat gaaagctatt  
102721 ttgtattaag cggggcagaa tttgaagcta aattaaacaa taaaaaaatt caaacttgta  
102781 aagtttatca agcaaaaaag gatgatgttt tagaacttgg ttttagcaaaa ataggttttc  
102841 gaggctatct atgcgtagcg ggtggattta agataaaaaag ctttttaaat tcaaaatcaa  
102901 gcgatgtaaa aatggatgtt gggatattta atggaagagc tttgcaaaaag gatgatgtat  
102961 tagaactaaa taacagcttt atccctttta atctatcaaa aagagaatgt gaaaatcctg  
103021 tttttcagtt tgctaaagaa cccactatcc gtgtttgttt aggcacaaac gatgatgctt  
103081 ttacgcaaaa tggcttaaat acctttttaa atactagtta taagataggc ttaaaaagcg  
103141 atagaatggc aatctatgca gaagctcaag ctatgataga acataaaaaat tccggccgata  
103201 ttatttcaga tcctgcggtt tttggaagta ttcaagtgcc aaaaaatggc ctacctatca  
103261 ttttaatggc aggaagacaa agcactggag gttatacaaa aatagcctct gttatagaaa  
103321 atgacttacc tttgcttgca caagcgaat taggaacaaa ttttaaattt gaaaacatta

103381 gcatgcaaaa tgcttttagaa ctctataaac aaaggggaaga aagattttaag acttttgata  
103441 aaaaaatcaa tcttgatfff gaaaatttga ttttaaggata aaaatgaatc caaaacaact  
103501 aagagaaaaa atcgcaaaag gtgagataaa agaacaaact tcaggcatgg ccttaggcta  
103561 cgcacaagca aatttggtta ttttaccxaa agaatacgct aaagactttg aaaccttttg  
103621 tatacttaat ccaaaaccct gcccgctfff agaaatagta catggtaaaf ttactcaaaa  
103681 aattgccaag aatgcaaata tttacactga cattccaaaa tattttatct acgaaaatgg  
103741 agtaaaaact aaagaggctt atgatataag cgagtattat aatgatgatt tgataggfff  
103801 tttactaggt tgtagctfff cttttgaaga agctttactt gaaaaaggct tagaaataag  
103861 acatattagc aataaatgca atgtgccaat gtataaaacc aatattgctt gtaaaagcgt  
103921 aggaatfff agtggcgaaa tggttgtfff tatgcgcccc tttactcctg ataatgcaa  
103981 aaaagctagc gaaatcactg ctaatfffcc tttagttcac ggagctcctg tgcaaattgg  
104041 caatgctaag gaaattggta taaataatgt tttaaaagct gattttggtg atgatcctat  
104101 tataagagaa ggcgaaattc ctgtatfff ggcttgtggc gtaactccac aaaatgtgat  
104161 aatgaaagca aaattgcctt ttgtgattac ccatgcgccg gggcatatgt ttataagcga  
104221 tattttaaat tcatctftaa aatcttagga tttttctta ccataaatat tgataaaata  
104281 tatagcaaaa atcgctaaaa cacagcctat taaagtaagt atagtaggta cttcatctaa  
104341 gataaaaaag ctgcaaatca aagcacttgc aggagtgatc aaaacaaaag aatttgcttt  
104401 tacacttctt aaaatgtgaa ttccataata atatatactc gtacctacca ccgtagataa  
104461 aaaagccacc acaaaaagat tgacccaaaa tttaaaatca aattgaaaga tctcataact  
104521 tttaaagatca aacaacacc atgaaaacat caataacgac ataaggttga tataaaaatt  
104581 aatcgccaaa ggatgagtc cttttgcttt atgagtaaaa acagccatca aagcccatat  
104641 aaaagcacag cttaaaaaca aagcattaaa cttaccxaa agctcttcca tagagcctaa  
104701 atttagcaaa caaagccctg aatcaaacc caaaaataag cctagaattt cactctttgt  
104761 gatcttgtga gttgatfff tatttttttg aaaaaatc gctatcataa atatcaaata  
104821 agaaaatata ggaatcatag tggttactaa aaccctcctt ttacctgcta aaccatgctt  
104881 tatagcgata aaaaatacaa aggcataaag cccgtftaa actcctgcta tcaataccca  
104941 ttttaaggca gttttttcaa gcctaagagg aatttttaag aagcttaaaa caaaaaatga  
105001 acccaataca acaaaagaaa aacgccaaaa ggtaataata gaagtatctg tataatftgc  
105061 caaaatctta gatgtcggcc atgaagaacc ccataaaaac atagcaataa caagtaagat  
105121 aaataaatat tttgaacgat ccatttacta cttttgaaa taacaagaa tatttttatg  
105181 atattaaaat gctaggtaaa taataacca gcataaatta atgttcattt aaaatcattt  
105241 ataagatagt ataaaaatt gcactcacta tcttgactta gttccaaac actftttgta  
105301 agtgtgcttt ataatccttg atatatfff ccacttgtgg gttttctatc acatcattac  
105361 aaataaaagt tgccaaaggc ttcataccca aaaactgatt tgctttgtgt aaatgcaaat  
105421 aactccatc tacgcccac cttcaaaaa actgatcttt atcattaaag gcttcaagcg  
105481 gtgcattcca agtaaggcta aacatatatt ttttattatt tacaagtccg ccgctgccat  
105541 atfttttact tgcacttct ctacttctgc catcgtttg ataaaaftt ccatgccctg  
105601 cagtaaaaac ctcatcgatg tattttttca ctatccaagg ctacccatc caccatcctg  
105661 gcatttgata gatgatcgca tcggcattaa gtatctttgc aacttcattt tctatatcat  
105721 aacccttatc gatataggft tcatcaacct ttaatccaa attftaaaga ctttcttttg  
105781 ccacttctg taaagtatca tttagcttgc cacctgaatg tccgaagctt tttgctccat  
105841 ttaataaaag tatgfttttc atagftttcc tttcataatt ttttgataaa acaaacgatt  
105901 ctatttgcct cactaaagcc caaagctttg tgaaaaactaa gactfttttg gttttctaat  
105961 tcacaatcac ttgcgaattc ctttgcacct tgctfttttg cccatftttc gcaaaaactct  
106021 aataattctt tagcaaaacc gcgftttgcga aattcttctt ttataaaaat cccttctaaa  
106081 taccctacag gagagctaga agatccctct acataatcat ttctftaaact tacatagaca  
106141 aagcctactg cctctgtgcc tatgtatftg agaaaaatgg caactftttt agaatctaaa  
106201 atfttctaaa attcttgctc caaatctftt aaattatgat ttggccaaag caaaagggct  
106261 aaatttgcta ttgfttcatt atcattfttg ttagctfttt ttaccataat aaacctaaat  
106321 tttcaacctt ttatcttcta atctcattct aaccaatacc aaaataagtc ctaaacccac  
106381 catgataata gaacttatcg caatgtatft agfttctftt atagaaatga ctaaacccaca  
106441 aagagtagca cccacactga tagaaatatt tgaaacgctt atgaaaagcc cattagtaaa  
106501 atctfttgcc ctagggaag gaaaggftgat gatataatgc attgcatfat tftaaaattc  
106561 atftaaaatt cftaaaatca agctcaatgt aagcatgatt gcaaatftgc ctgcatftac

106621 aaaaatcaaa gcatatatca aaatcatcgc catagaagta aatacaagcg tttgatttga  
106681 atgattgatc aaagttttac ccgcgatatt attgccgata atacttgcaa aaccataaat  
106741 aaaaagtgct aaactgatat ttgtaaagct cattttactc acgctaaata aaaattcaga  
106801 ataataagaa taaaaaccca aatacccccgt cgaaatacaa aaaacagcaa gcatagaat  
106861 ccacaaaagc gcatatctta gacttaaaag ctgttttcct acctttatcc tgcttgtcct  
106921 tttaaaatca ggcataaaaa acaaagtgat aaaaaacgct aaagaattaa tcaccacata  
106981 aaaagccatc gccatttcaa agctgaaatt cccacaaaa tagctactca gtggcacccc  
107041 aagaaccaac cccgcactaa tagccataaa aatctttgca actatatgag gcactttact  
107101 tttatcatct gctaaatttg cagctgtgct aaaagcaagt gcaagataaa taggatgaaa  
107161 aaaagcaggg atagctctta aatcaaatg tagccaaaa tcatttaca acatgcttgc  
107221 caaagagcta agagaaaaaa tagccaagca aaatagcata agcttttttag gattaaaatt  
107281 cgcacaaagc ataggcgcaa tagggcgaca gcacattaca atcagtgcaa atatactcac  
107341 actccacccc gcatcgctaa cactaacgcc aaatctctc gatataagcg gtataatccc  
107401 catcaccca agttccatac tgataagccc aaacacacct agacaaagcg tgattaagat  
107461 cttgatttga tgagtattgt ttatagttat acttgattgt tgcattaa aaacctttt  
107521 tcgaaaaatt aaactcgcaa ttttaattta tgcaagttat aatgtcaata cataaagtga  
107581 tggtttaatc acatataaag gaaagaaggg gagagaaaa caaaaggagg atatcatgat  
107641 agaacttata ggagatgtta atttagaaaa atatatggga acttggcctg agatggctag  
107701 aaaacctgca tttttcaaa aatcttgcgt tcagtctaaa gctgaatatc aactagaata  
107761 cgaaggctct acccctgttg taaagataaa aaatatctgt gttaaaaaag atggagaggt  
107821 ttcgcaagtg caaggcaag ccaaagtaaa atccccaga gctttatcgg tgaatttag  
107881 cattttatg aatttattta ataaaacaaa ttatgaaatt ctctttgtag acacagacta  
107941 tgaagtcgct gtcgttgga gtcctgataa agagtatctt tggattttgt ctagaaaaat  
108001 catcgataaa aaagatatag ataaactctt agatatcgct aagcaaaaag gttttgacat  
108061 tagcgatata gtgtttgata agtattaaaa taatttttt agttcaaat ctaagtttc  
108121 aaaaaatatt ttcgccttag ataaatcaaa aaaggcgtga tgaatttag cgtaaattat  
108181 caactcatca actttttgt aagttgtaaa aataggcgca taaaattcat agccattttt  
108241 taaatgcaaa gaaaaagaat taaaataaga tttaaaactt gatataataa aactattttc  
108301 tggagcttgt tttatacaaa aacataaatc tttttttaa aataattcat aatcttttc  
108361 ataattactc aaaaaaatat tgaatcata atcaaattct gtaaaagtat tgcagatttc  
108421 attatttttg agtaaaacat aagcaggatt aattttatga aattgaattg cttcgtttc  
108481 aatcacgctt ctttttaact cttgtgtatc atttacaatt ttacttaaag aataaataaa  
108541 atgagaattt ttcattttat ttattttaaa actatgactt agttcaaat tacttaacgc  
108601 cgtatttgta tagtgtttca acctctctt tcatagtta cttagctta atttttata  
108661 cataaataat tttattcctt tgtcatatcg atcacatagc ggaattttgc tttcctgaa  
108721 gtgagatttt cataagcttt gtcgatatct tttgaagtga tgagttcagt ttcagggtaa  
108781 attttatggt ttaaagaaaa atcaagcatt tcttgagttt ctgcgattcc gccgattagc  
108841 gaaccataga cttttttacc cgctttatgc acaaaggtta tcacgctgat acttggagca  
108901 acttcgtgag gtggcaaacc cactatcgcc atttcaccgc caaatthaag caaatccata  
108961 taagcactag gatcataagg agttggaatg gtagagatga taagatcaaa gcgttctttt  
109021 acagcatttt tatctgtgct tgtataaaaa gaactcacgc ccatagccaa agcatcggct  
109081 tttttgtttt catttctagc aaaaacactt acttttgcac ccattttcac agcgtattta  
109141 accgcatca taccaagtcc gccaaatccc gctaccgcta cgcttgagcc ttctttgata  
109201 tttgaaaatt taagcggaga ataagtggta attcctgcac aaagcaaagg cgcgactttt  
109261 tccatcgggtg catcttttgg cacacaaacg gcaaatttt cacttacaac tatgttgtt  
109321 gagtagcctc cataggtgtt ttcattatca tgaanaatat cgcagctatt gtaagtatag  
109381 atggtttgtc ctttttcgca aaattgctct tgggattttt tgcacgcttc gcattctcca  
109441 catgaattta ccatacagcc aaccctgca taatccccta ctttaaat gctcacattt  
109501 ttaccacag cgattacttc tcctgctatc tcatgccctg gcacacaagg atacacagct  
109561 tctccccact cgcttcttgc agtgtggatg tcaactatggc aaattcctgc atataaaatt  
109621 ttaatcaaaa tatcattatc acccacagcg tggcgtgtga attcaaaggg tgtgaatttc  
109681 gcatctttgc taagcatagc atagcccttg ctttgaatgc gaccattttc taaaagatt  
109741 ttagagtcca ttttctctcc ttattttttg atttttgaaa ttataaaaca ttagagtagc  
109801 tataagtcaa gagggaaatt aaatttttt aaaaaatta ttataaatgt tataattaca

109861 aatttaatta aatgtgcat aagatatttt taacaccttt aaatTTTTaa tactaaaaa  
109921 ttaatcctat tcgccaacca attccttagc taaaatctca gcttgagcta ataccatc  
109981 aattgcaagc tgttgcatat ccggtggata gccgtattta ttgagtactc tttttacagc  
110041 tactcttagt cttgctctta cttttcttt tatcatccaa tctatacttg cattgttttt  
110101 gatgatttgt aatatctcgc taacgagtg ctaaaagcttt tcattcccca agatTTTTc  
110161 ttgcaaacat tatccaacta tttgggttat aatttcacca atattgccta aacagacttt  
110221 gtattctaga ttatctttat ctaaaaaacc taaatggtat ttgatgatgc tgatacttag  
110281 ttgattacat ttgattctgt tgtttatttt gatataataa tctacttctt ttgctagtac  
110341 ttttaatact agttagaatt atTTTTtca ttgtctgtaa aacttataga tattatcttt  
110401 attttactaa atgataatta aataaacttt caaactttca ttatatatta atctaata  
110461 atatTTTTaa taatataacc ttattaaaaa tatgattcct gataatattt atttagaaaa  
110521 ataactatat tttttattta tctataataa atttatgaaa ggattacgaa gaaaaatata  
110581 accaaaagt ttattttaat aaaaatggag aaattaatat aaaaaattaa taaattaa  
110641 atttacaaat attaactaat ccattaaata aaaattta atcttcattt aagaaaattg  
110701 accaatatta ttctTTTTta atgtttaatc ataaatgtgt ggaaaataaa attatTTTaa  
110761 ggagataata aaaaataaaa attaaatgat aatattttat aacaatgtat aaaatatata  
110821 aaagaaataa taatagaat tattaacttc aagctaagag gtaaaaaatt tgagcttca  
110881 ctcaaatatt attagtatga ttaaaaaata tagtgaagaa aataaaaaaa gaaacaacat  
110941 agagcaaaaa gttatcaatc tagattggta atTTTTaata actaatattc aaaaaggaga  
111001 taaaaatggt aaaatttgat tcaggatatt taaaaaatc aggagaaatc atttcttag  
111061 aggaaattat caaattgaat aaacaaggca agcttaataa acatgatatt tttgtcctg  
111121 attgcaaaat agcaagactt aagctggtac ataaaaaaaa tttttttta caaacaagca  
111181 ataaacaaat acataagcaa tattgctcga aaattacaga tgatacaaaa tctacttcaa  
111241 taaaagaacc aaatgatatt gattctgaaa gagtaaagta tattaaaaaa aaattaaaga  
111301 atctattaga aaatTTTtaga ctaaactcaag taaatattga tagtgagggc aatgaagata  
111361 aaaatctcaa agataatgat ttttccaaa atagtaaaga ggTTaaat atgaaataata  
111421 caacccaga tgaaagtcgt cattgcttta caaattataa aaagaaaatt atcccaagc  
111481 aatcacatga tgcgTTTTac tttggaattt gtaagataga aaaaatagtc aaaaaacaag  
111541 atgataagat agataaatac tttttaaaat taaaacatta tgaaaataat atgcttttag  
111601 catctttaag cataacacc attgtaggtg aatatttagg aaataaattc caaatcata  
111661 taaacaataa cgaactttat aaggTTTTcat tttttacaaa tggaaacaatg gctgatagag  
111721 gagaaaatat tgttattttta agatctgatt ttttaactt tgaagaatat aaataaaagg  
111781 agaaaatatg gatgcaagaa gattatgggt tatccctgat gtcataggat ctaacagagt  
111841 tcaatttcaa ataccagtct accaaagaaa ctatgattgg tctgttgaaa attgcaaaaa  
111901 acttatgagc gatattaagg atattgtaga aacaggagaa aagcattttc ttggcacaat  
111961 cgtgtatatg tctgacaaaa agacaagtgc atcatttcaa aaatatataa taattgacgg  
112021 acaacaaaga ctgacaacga ttatgcttat tctaaaggca cttcacgata ttgctctcac  
112081 aataaatgat aaaagtgcgg aacaaattga caatgaattt ttacacaata aatattgtga  
112141 tgaagagttt aaaattaaat taaaacctat taaaacagat aatgaacaat ttacaatgtt  
112201 attaaaaaat gatgaaaatg ttaataaaga ttcaaacata tatagaaatt atgaattttg  
112261 taaaaaatat ttagaaaac tcataaatga aaattcttta actccaaatc aaatTTTtaga  
112321 agcattattt agtttagaaa tcgTTgaaat agtattagaa caaggaaaag atgatccaca  
112381 aattatcttt gaaagtataa attcaatcag aggttaataa cttttttact actTTTTTaa  
112441 cctataaaac aaataatata gtaaataaaa aaaagctata taacgcgttt gttaaatttt  
112501 ttaaaaaatta tggtaaaaagc caagaagaaa tacttagcga attaaaaatg aacgcaagaa  
112561 ttttttctgc ttttataggc aataaaattt attcaaaatc aattcaagaa attttaaaat  
112621 catatgatta tatagaccaa aaaaacattg tttccatttt tacttcatat ttttaatgat  
112681 tttgaaaaaa ggataataga agaatacaaca ctaataaaaag tattagaatt tttattatcg  
112741 tttttattgc ataggcttgt gtgtgaaatt gattcaaaag cattaagagg attatttgca  
112801 acattgtata acagagtttt taaagttcaa aaaaaataag ataaatattg caatgctatt  
112861 attaaatttt ttcaaaccat tcattcaaaa gataaaatac caacatttaa agaatttcaa  
112921 acttcactta gtaaaattaa catatataga aaaacaaagc tatgtaaatt tatattaatg  
112981 gatattgaaa attcaagctc aaaagaaaaa atgcttgatg ctgataacat aagtatagaa  
113041 cacataatgc cacaagctct tactaaagaa tgggagaatg aattaggaaa tattgataaa

113101 tatgaggaat atttacataa gctaggcaac ctaacagtta cgggctataa ctctacactt  
113161 agcaataaaa gttttcaaga aaaaatcaaa acattaaaac tttcaaaagc tatatTTTTA  
113221 aataaagatg taatatcaga aaaacattgg acatttgata aaattgaaac aaggggcaaa  
113281 agactagcag agTTTTTtgc caaaaaatat aaggttgata cggtaaaaga tgaagatatt  
113341 gcatttaata attttagattt tgtaacatta aaatatgaca atattaaaaa gaaaacttta  
113401 gattgTTTTA ggtttcaaaa tacaacacat tatgctgata attttactac tttatTTTTg  
113461 gacttattga aaatattgga tgaaattgat cctaataaac taacaaattt agcggaaaat  
113521 cagcattcat atgttcccga tacaacaaaa aataaacatg tctatatcag caatcaagaa  
113581 gatgagaata tgagaaatcc tattaatcc aaagaaaatg tatgggttga aaaatcaata  
113641 ctttagata ggatatgtaa aatcacagaa agtgTTTTA atgaatttgg atttaatatt  
113701 gaagatttac aaatcggatt agtaaaaaa taaacctcaa gcgatgatatt tttcatcgtt  
113761 tacataattt taatatataa ttcttacagc cacaaaaaca aacttttaac taagaaaatt  
113821 aatctctaaa cactacctac cacgcttacc caaatagatt tttataaaga ttttatgtag  
113881 ttttctatgt catttacttt gtttatcttt tctaaaaatg gcaccatttt tactattagt  
113941 tcggttgCGA ttttgTTTT aatgccttca tcaaatcag gcacattagc aaacttacta  
114001 aactcactat caataactaa attttgcaaa gttagaata taaaacaaat taaaaattta  
114061 tccgagtaaa ctaactaaaa tatctaatta taaatttata taacttatga tgtaaaaaaa  
114121 tgactgtttt aaaaacacaa aaataggtaa tgcttttagc tatgctgaag gtaaaaaagc  
114181 gtaatTTTT accttaaaaa tgaagcggct agTTTTTaa aagagaaaat caaaaagcc  
114241 ataatTTTT tagttttaagc gaaaatggat aatggcattg aaaatgagtt tttctactca  
114301 ccaagcttga ttgaacttga aaacttttag ctcttggctt accattaatt aacataaaaa  
114361 acaacaatga actagcccaa aaaatctacg aaaacatcca aaacaacctt aatgaaataa  
114421 agaattttaa tagggatttt cgTTTTgtta gcgttattta ttaggctata atttcaaaat  
114481 aaaaacctag ctaaaaaaca caaaaataaa ttcttttaac aaatgaaatt tggTTTTaaa  
114541 acaatttatt tttgcaaatc ttttagatat tttttaaaca tatctttatt cataatctta  
114601 tcacctttat cctctattcc attttcacaa cgccataccc tccagtcatt accaattttt  
114661 ataggaatat aaaagatgta tcccgttttt ttacttgcaa acaaatatgc ttttttagt  
114721 ttttctatct tttctctata ctctttaaaa tctatatcat ttccatttaa atgattttaa  
114781 ctctttactt caaataaatg tatcttatct tttttatctt taaatataaa atcagggtag  
114841 cttgtgtgct ttttaagatc gtaatattcg tactttatat ttgatttttc aatataattt  
114901 ttaccaataa aatatatttc cttatcatca atacttattt ttttacaaca gctatatgct  
114961 acatcttcaa gtatttcaag ccatttcaac tctgcgtcac tatcaaatga aaaattatct  
115021 tcttcgcaag tccacatcca gctctttact cttaaattat ttttgctctt atcaaaaaaa  
115081 ctataaatat ctctcttag ttcaacttcc tttatctccc catatttatc ataatcttct  
115141 ataacctcta aaactttatt ttttatctca tcaatatttg cattgaacaa aaaccaatca  
115201 ctatatgatt ttacacactc ttcttgcttt tgttttactg tatcatttac attttgcaaa  
115261 tctttataaa tatcaaatat tgattttgaa aactcatcta atttttctc tttcaacaa  
115321 tcgcttatat caataacgct taatggattt tcttgtagtg ttgttatttt aaatggttta  
115381 aattctttta taatttcatt ttcaacaaa ctaaatgct caccacctt taaatgagtt  
115441 tttatTTTTA agaattgctc ttcttggtt tttaaacct aaacataagc tttagaaaat  
115501 atttcttgag tttttttatc tagcatctca taattcatta gacacggatt tctgcgaact  
115561 ctaccacta cttgctcatc aagttgtttt gattttgagt ctctaacctg aaaaagcata  
115621 caagcacgag ggatatcaaa gccttctgta atcaccattt taaatataat cacatctatt  
115681 ggaaaatcat tttgcttaat gtagttttgc cataaagatt ttttttaat attattaagc  
115741 ttactattag tttcatacat attttctttt tctacaaaat acaccaatt taaactatga  
115801 ttatttAAAA ctttttgat tttttccatt tcgcttacgg cattaatttc atttgaaatt  
115861 tgtataatga aagcaggtct tataccttgc ttaaaaataa aagactgtat ttctttaaat  
115921 ttttctaaag catttaaaag ctctttttct aattcagatt ttgtatctat atattctaca  
115981 cttttaatca aatttgcatt cacagcatct acttactaa tacaacatc gtaaatatta  
116041 tctgttggag tggcactaaa atttataacc tgagaaaaat aatcacttaa agcacttaaa  
116101 ttatttGtct ttatatggct ttcatctctt attaaaatta ttttttagct gagtttttac  
116161 aatcttgcaa aaatgccaat aatgtctttt ctgtattaat cctacttttt ttagtgtatt  
116221 gtgcagttgg caaaacaaaa acattgcaac tattatctat atgcaaaacta tattcttgat  
116281 ttttattatt ttcattacca ctacttatca aaaaaggttt taggttttta aacttaacta

116341 agctaagggtt ttcaaaactt tcatagcttt gatttgctaa tttgccctta gataaagtag  
116401 aaactataaa cactatattt ttattattat caagcatttt attcataaag cttgacatca  
116461 tatatgtttt accacttctt gtaggtgctt ttaatgttat tttatcctta ccacttaagc  
116521 ttaaagata taatttggtt atcgctttgt tttgtaattc tataatctct tgcttcattt  
116581 ttaaatcctc taaatctttg caagtgattt caaaatcttc acaaatccat ttgattttgg  
116641 cttgaatatac ttgttttaaaa tcttcccat aaagcttctc atcaattaca ctaaataatct  
116701 cttgattatt tgaagctatg ctatctagct catatacttc taaattattt tgatatgggt  
116761 tattatcttt taaccattta aatcattttg tgccatcata acaacttctt gtcataatcc  
116821 tttttagtct tttagaagtt acatcgtaag ctatcccgtt tggattaata tcagttatct  
116881 cattattgggt tactaaaata aattgtcttt tccaccatc ctctttattt agttgcataa  
116941 ctgcatgtcc tgttgtgcca cttcctgcaa aaaaatctaa aacaatatca ttgcttccat  
117001 tttcatcact aggagaaacc atttttatca aatttattaa aaaactactt ggtttagggg  
117061 ttgaaaaagg tgctttattg ttatcgtttg ctaataatca atctaattct tttttaccat  
117121 tatcattaga attctcgttt tctatgaaag ataatgtgggt aatgattttt ccatctataa  
117181 attcaatttg cgtatctcca ttcttttttc tacatttttc ataagattta gtgtaaattc  
117241 tatcgttttt aacaactata aatcattttt ctatacccca ctctacagct tttttattcc  
117301 atctccacac ccaatctggt gttccatgca aaccgttttg tctttccaaa ttttttcat  
117361 aactacctcc cggataaaaa gtttttccat taattgttat agggtaatcc atgttttttg  
117421 aatattttta agaactataa tctagtgttt gtgttaatgc gtattttcct ctaacttcta  
117481 aggtaaattt agaattttct ctctcatcta atacaaaatt atctaataagg ttgatatttt  
117541 ttacataaat taaaatataa tcatggtttt tagaaattgt tttgctgctt tttccacctt  
117601 tttttgttat tctaggagat gagcaaataa aatttccttc tccaaaaaca tcatcaaata  
117661 gacatttaac ataagcttga tttttatcat ctatgctaca aaaaataacc ccatcatcag  
117721 ttaaaagttg cttagctaaa actaatctag gatataacat agaaagtaga ttatctctag  
117781 tgattgcggt tgtataattc gtctttgcaa atccacctaa atcatctttt ccatatgggtg  
117841 ggtctatata aattactttg attttctttt tatgagtaat tagtaggttt aaaagtgctg  
117901 gataattatc acctatgatt aatttatgct gtaaatcccc ccccccggt agtaaaacta  
117961 aggctttcgt ttttcttaaa ataattgata gtgttagtat tttttcaag ctttggttca  
118021 aatgaaaac ctgttttttt gtaagtcatt cctaaggcta gtatttttaa aatatcggtc  
118081 tttgcatttg cattttctaa taattttggt aaaaactcag cattttcact ttctaaaata  
118141 ccatcttgca ttcgctcttg aattttacta attgcatctt gccttaaatc ttctaagtta  
118201 tctgccattt ttttctcctt aattttttta cattattgca aaattaaact aaaaataagc  
118261 tatcttaaaa tattaatatg attttaatac aatgtagcca tataaataaa aggagataaa  
118321 atgataaaaa ttgctatagc atatgatttt gatggaacat tagccaaagg taatattcaa  
118381 gaaaactcat ttataccaaa agtaggaaca aataaagatg atttttggag aaaaacaaaa  
118441 gaaaccgcac aagaaaatga tatggatgag atattatctt atatgtatca aatagtaaaa  
118501 tgtgcagaca atgcagatat aaaaatcaca aaagatgctc taaaggaaca tgggaaatca  
118561 gtagagtatt ttaatggagt tgaagttttt tttgaaagaa tcaacaaata tgcaaaaaat  
118621 aaaaacataa aatagagca ttttataata tcgtcaggaa caaaagaaat gctagaagga  
118681 acaacaatag caaaatattt taaaaatatt tacgcatctt cgtttatgta tgatacatac  
118741 ggaaagccaa tttggcctgc attagcaatc aactacacaa ccaaaacaca atttttattc  
118801 aggataaata aaggtatata taacgcttgg gataacactc aaattaataa atatatacca  
118861 gaagatgaaa gaaatataga ttttaaacac atggtatatt taggagatgg agaaactgat  
118921 attcctgcta tgaactact aaaagataaa ggtggattgt ctatagctgt atatgacccc  
118981 gaacatccta aggaaaaaat tgacaatgta gaaattttag tagataatga aagagcacat  
119041 tttgtgtgtg aagcaaatga tgaagaaaat tcttctattg atttaatcat taaaaactat  
119101 atagataaaa tagctttaga aacacaattt ggaaaatgca gagcaaaaca accatcaaac  
119161 gataaaaatg aagtatttaa agatgatgat gacgctaaaa taactccaga agataaaaata  
119221 aacaacgctt taaaattact agaggtgat aaaatttcgc aaaatcaaga agataatgca  
119281 atatatttaa aagcaagtgc ttatgatgat tatggatatac aaacttcttt ttatatattg  
119341 agtggtaaaa aatatatagg ttttgcaaaa attgcaagaaa aaaatcaagt agaaaaaag  
119401 catacaagtg aaaattttaa aaaagaattt aataaactag atgaaaaatt catatctaaa  
119461 ataactttta aaaacaacaa ttttaataaa gaacaacaaa aagcttttaa gtttttatta  
119521 aacgatatat ctaatactaa agaacatgat aatctagaag ttgttcaaaa atctttaaaa

119581 agaaattaat aatatagatc gagcttaaag aatataaact ttatgcttga ttttaacaaa  
119641 taatthttata ttctthttgat aatacagtct gtttacttta tccaatataa ctttactaaa  
119701 actthttaaca cttatthttcct gtatgthttat gtataaaaata actaaaaaat caagaattta  
119761 aaatcgaaat ttcgthttgth catatthtgct acaaacgaaa tttatatctc aaaaaacat  
119821 atcctaaaca ctaccaccac gcttacccaa atagatthttt attaaagatt ttatatagtt  
119881 ttctatgtca tttactthttg ttatctthttc taaaaatggc accatthttta ctattagttc  
119941 ggthttgtgatt ttgthtttcaa tgctthttcatc aaattcaggc acgthtagcaa acttactaaa  
120001 ctgctatca agcaaggcaa tgatthtgccc cacatcagca ttattaaaat cthtagccag  
120061 atthttgctct agcggatctt ttagcaagtc cthtttaaat tcgctctcgc taagccttht  
120121 tgccctgtaa tcttctaaaa tcccctccac tctagcacta aatcttacia aaatthcagg  
120181 attaaccacc tcatatthttt tcacttctth ttctagtga ttttagtatcc cataagctth  
120241 taccgtatca ttaaaatcac ttgctacctt tgaaaaatca tcaccaagta tatcaagcgg  
120301 ttcattthtagc gtataaaatth gccctactth taaatgctca tctaatagct tthgcatact  
120361 ttgctcgtat tctthtttaagc taaaatcttg tacataaaaa acctgtgctg agcttctthgg  
120421 aattaagtat tthtttaagaa ttgtctthgat tthctctctt tcatcttgc tcaaattcgc  
120481 cctthggctta cgagtatthta gtaccgcacc tacacgaagt tthattthttg agthttcccta  
120541 atgctthttc gcctaagctt gatgagtggga tgcaaaccat gagtcaaaat ttcacaaaac  
120601 ttgatgaaaa tactthtttht tatcacgcat tctthtaggtg gagtthcgggt gctthgattth  
120661 ttaaattcgc ttgatgaaag gactaaagtc ggcggtgtaa taattgthttg caccctthtga  
120721 tgaacctthg gcaaaattgc ctatthttaaa tgatthttata aagccaaaat tagactataa  
120781 aaagctthgat aacatgataa tttacaaaat catcatcagc gcaaaagacg ataaagctgt  
120841 gccaattcaa tgagtgaaaa tthtaggatat taaattcata caaactcaa atggtggaca  
120901 tthtatggaa aatgaaggct ttaaagatth gcctthtagtt ataaaagaat tagagtgtat  
120961 taaataacc ttaaatataa gggthtatccg gctthtatcca aaacgctthta agctaaaata  
121021 ctgctthtata ctggatctta gctthttgagt ctgcaatgct tthacgccta aaagtccaag  
121081 tgcgggagcg aatthtaacc catgactaag cccaccata aaaaagagat tthcatctaa  
121141 aaaatcgatg ataaaatcat catcagggt taaaggataa gtacatacac tgcctthtgc  
121201 aaaatcttht aatcaggaa aaaatcttht gatatgctth cctatatcaa gagtatctthg  
121261 ctcataagat ccaaatthca cgcgthcttc gcgggtgcta atgatctccc ctactctatc  
121321 tctacctact tthaatccat ctgcaaaatc aggaaaacca taaaataat cgtctthcaa  
121381 ttcgagtata aatgctggaa aacctthtga gagtthtata gaatccgtat caaaccaatt  
121441 caccactthg cgtctaattgc ccacaggcac tthttggcaag tcaaattcac acacgctcaa  
121501 cacttcattg acataacttc ctgactgat tagaattthgt tthgctthgta tgctagaatt  
121561 ttgctthttg atthttataca ctccatthttc tthacatata cgcacgattt catcacacia  
121621 agtatgcgcg ccaagctthg aagcagcatt gatagcactt tthacactca aatcactata  
121681 cacaaagcct gtatctgtht ctaacacgcc gaaaaaatca tctgatacgc aaatattata  
121741 atthttctthg aatctthttg cattthagaat tthttgctthta agatcataat tthttcacact  
121801 taaaagcaca tthttgcataa aagtagaatt tgagccgata tthaaaagcc cacaaagctc  
121861 aaaaagctth atatthttgct cthtttcaa ttctcccaa agcgtgtatg cctctthgtaa  
121921 aagcggata tactthttcac cctcgccata agctatacga aaaatctthg tatccatg  
121981 ataagaacct tgggtatggg gtgctthgaaa tthtatcaata agacaggtth ttaagccat  
122041 tthtagccgca taataccccg caaaactccc cacactacca cthtcaatca ccgctatctc  
122101 ataagctatt ttatcttctc tgcgctacca atthtgatata taaatthcag aaaaaattat  
122161 actataaata ttagthttagt gthttataaaa aatacaaatt tatcccttac ttagaaatth  
122221 tgaggattaa aatthtaatta aaaaatthta ggcgattaat cacctthaat tcaagcttht  
122281 tatattgcta gagtthttaga aatthttthgt aagthtgaag cattthctta aatthtataa  
122341 aagtatthta gaacaccctg aatthttgact tatagcgtct tgataagctt ttaaatcaag  
122401 cthgthttgca tthtgactaa agatthgcaa aggctthttaa ctcttacatc ctgatattc  
122461 aatgtataa taaatcggt ttaaaagctc ttctaaagtc gcacatgat gccatcata  
122521 actctctthg gcgccacct aagctgthtac aatthtgaat tthttatctt ttaaaagthc  
122581 tthattthttc ccataaagaa ttgctgthta aacctatct tgcactctt ttaaaagthc  
122641 tggggtgcta aacaaaaaa gtggaaatthg aaagatgatt ttatcgcat tthttataa  
122701 atccatthct ttactgacat cgatthttgcc ctctthgtaa atthctgctaa gattgtgaat  
122761 ttgactthgt tthaaattht taatgctthc aaataaagcc ttatthtacct tagaatctc

122821 ccaaaatgta tgtgcgaaaa tgattaaagt tttcattttt tctccttttt ttatatattgt  
122881 tgcattataa aatataagag taacaaagct tgcaaaatat aaaatattgt ataattaa  
122941 tcatttttaa gggcattgat gcaaaatcaa gataaatttt taaaacaatt taaaaatta  
123001 gcacttttag ataaaaatat acgccttggt acacttgaag gctcaagggt taataaaaa  
123061 gcgaaaaaag ataaatatca agactatgat atttcatttt ttgtgccact tgataaaatg  
123121 aaagattttt tagggcttaa tgaaaagcaa aattttaacg aatgtaaaaa cttgccaaaa  
123181 tgtatttttag agcttgaaaa atcttcatat tttaaaaaaa ttttaatgct tcaaatgcct  
123241 gaatgtatgg agttttatcc acctgatttg ccacaaaatt ggataagttt tttagtgcct  
123301 tttgaaagtg gagtgaggct tgatttaacc attattcctt tagaagattt gaaaaattac  
123361 tatgaatttg agcctttaag ccaagcgctt ttggataaaa atgggctttt tacgcacact  
123421 attccaaaag ccccathtag catcacacac cttagccaaa gaagctttga tgatgtttgc  
123481 aatgagtttt attttcttta tagttgctta aaaaaagctc ttttaagaaa gcagtttatt  
123541 ttgtcaaatc atttgctaaa ttctttgaga aaagcacttt ttgatttgct tagttttaaa  
123601 attggcttaa attttggctt tgaaatctgg ctgggaaaag aatacactaa tattttagaa  
123661 tttttagaag aaaaagaagt aaaaatcatc ttaaaatctt ttaacaccgc cacgctagaa  
123721 cacatcaaaa aagcaagaaa aaagcttgaa attttatttc ataaaaatgc taaatttgta  
123781 gcaaaaaaga gtgattttta gctttttcct taccgaaaa atgtgaaaag gtattgtaaa  
123841 attttaggaa aattgtagag tttttaagct ttacaatttt tataactaat aaattatatt  
123901 atccagctta aaaaagataa atttacattt tttttatata atgcacggat aaatactcat  
123961 agggattatt tatgcaacaa agtcttaatg agctagaata caaaacttta cgagaatggt  
124021 tttataagat ttttgacaat aaatcttata aaaacaaaca aatgtttcct aaaaatttag  
124081 aagatttttt ggaaaatttc aataaagacc acgccttaag tttttgcatt aacaaatata  
124141 acaacgcaa aatttcacaa ataaatgcaa gtgttttaaa acctgtggaa tctattttaa  
124201 aaaaacttga tatttggaa ttaaagctag aaggcttgtg cttagaagaa ttacctagct  
124261 ttgttttaga gttaaaaaat ttgcaaactt taagtctata tgaaaataac ttttggcaac  
124321 tagataaaat aatgagcta aaaaatctaa aaaagcttaa ttttagctcac aactgctttt  
124381 gcgaaatacc accactttct ttacccaatc tcacacacct aagcatatat ggtaatttaa  
124441 tagaaaataa aatgaagca gattccatag ggcttaaaaa ctttaatact ccaaatttaa  
124501 aaaagcttga tttaggtaaa aatgcactta attatttccc tagagagatt ttggagtta  
124561 aaaacctaaa aaagcttaat ttaagctcta ataaaattac atccttgcca agtcttcttt  
124621 ctttgcaaaa tcttaaaatt ttaaactttt cttgtaatgc actaagtga atttcaaaag  
124681 agctgaccac tctgccaac ttagaatacc ttgatatttc ttataataaa ctcaagctc  
124741 tagatactag cttttatgaa gctaagtttg agcttattaa agaaggtaat aaaatccgc  
124801 ttacagatta tgaaaaagat cgcacttcgc atttaacc caaagaattt aaagctttta  
124861 gcacttggct atggaataac tgccatgatt gtgggcttat gctagaagat atgcttgatg  
124921 agtttagatg gtatgatgat tatggctatg atgcaccaga acttaaagag tggttgttac  
124981 aaaccgtgt ttttgggctt cttagagatt gccagaggt gcatgagtta ccaaagagt  
125041 taggaaagct aaaaggactt caaaaaattg atgtctctta ccaccaatt aaagaacttc  
125101 caagcacaat ttttgggtata aaaagcctag aatatcttga tatttcagac acggatataa  
125161 gtgagctttc aagtgagatt aaaaacttag aagaattaag attgctagat ataagtggca  
125221 cttctataaa ctctctgcca aaagaaattt tagagtgcaa gaaattagaa cacatcttag  
125281 tagatgaaga cttcataatc ccgaaaaatt tcccaaaaa tctcataaaa acttcgctaa  
125341 atgaagaaga atggaaaaaa ttttaactaca attaaaggag taaatatgca aaaaccagca  
125401 aaagttttag aaaaacaact cattaacgca gtagaaaatc tcaatgtaga agcagttaaa  
125461 aagcttttag atgagggagc acccattaat gcaaaaagtag aacattatgg cgaagagagc  
125521 catctttttg gcgatctgta tagagattat tggcataact atcgctttga agataagcaa  
125581 aaagaagtgc agttaatgaa aaagattcta gatctcttct ttgctagtaa ccaaagatt  
125641 gaaggcgagt tcaaaggaaa gggcgataat ctgctttgct ttatgattga gcacaattat  
125701 ctgctagatt gtggaaagct ttttaagacta gagcctgaaa tcaacacca aaatatctat  
125761 gaaaatccc taatgatagc agtgcgatag agaaaaaata aggcagtaga actactacta  
125821 aagcatggtg cagatgtaaa tctagctgct aatgcaggga cacccataga gtatgcaatc  
125881 acttataact tagaagtttt gccactttta ttagaaaatg gtgggagtgt tgatgaggcg  
125941 tttgtagaag cgtgtcgtaa ggggtgatgag ggacttataa aagagctttt aagcaaaggt  
126001 gctaagatag attccacaaa tagacataat caaatgcac tctttttcca aaaagcctat



126061 acaaacaaaa atatTTTTta tatgcttcta gaatctggag taaatatcaa ccataaagat  
126121 aaaaatggct tcacacctat ttttcgtgtg atttataata aagacacaga ttatTTTggaa  
126181 atctTTTTtag aaaagggTgc agatattgaa gcaaaaaata atgctgatat tacacctgtg  
126241 cattatgcct ataatagagg ctttcaaaag gaagcaaacc tattagtaag atTTTggTgca  
126301 aatgtaaata atcaagataa tgaagggata acgccactta tgcaatctat cattgaaggT  
126361 aagcaaaatg cttttaaagc actgctaaaa gctggggctg atattagcct aaaagataaa  
126421 gatggcgatg atgtgtattc gcttattaaa agtcagattg ataaaaaatc ccaaaaagca  
126481 tgggaagagc taatagccac tacaaagcct gtaaaaatca aaaagccaac tcctaaaagc  
126541 acaaaagttt ctactcctaa agtcgctaag ctaaaatact tcccaaccac caaagaagag  
126601 cttttaaAAC tcgttgaaga tagcaaagta aaactagaaa caatcgatac aagcaagatt  
126661 aaagatatga gttgtatctt tgaagaatca aaacgcagaa gtttcaaagg cttagaaact  
126721 tggaatgtag agaatgtgga aatatggaa gatatgtttc gtagggcaaa gttttttaaC  
126781 cacgatatta gcgcttggaa tacaaaatcg cttaaaaata tgcaaggcat tttttatgaa  
126841 tgcgagaatt ttaaccaacc ccttgataaa tgggatgtaa gtaaggttac aaatatggct  
126901 tgggcctttt atagatgtat aaagttcaac caacctctag attcttggga tgtaagcagt  
126961 gttactagta tggatcatac ttttaatagg tgcatagagt ttaaccaacc gctaaattct  
127021 tggaatgtaa gcaaagtaga aacaatgtgt gctatgttta tggatgcaag gcgTTTTaat  
127081 caacccttag atctttggaa tacttctaaa gtaaaaagaga tgggacatat gtttagtggg  
127141 gcattttctt ttaacaaaa tatagaatct tgggatactt ctaatgtaga gggtatgtca  
127201 agtatgttta gtgaggcagt ttcttttaac caaccactaa ataactggaa tgtaagcaag  
127261 gttatttata tgcaatgtat gttttatggg gggtttggcg gagaaggagg ggctatgagc  
127321 ttttaaccaac cccttgataa atgggatgtg agaaatgtga aagatatgga tcgtatattt  
127381 tctaattgtc gcaaattttc acaaaatatt gacaactggc aagtaagaaa agattgtcgc  
127441 ttctcctatg aatttacaga cttacaaggc gagtttgcag gcagtagctt acaaaaacta  
127501 cccaaatggT acgcacaaat tatagaagaa caaaaggcac aaaaaagca agggtaaatt  
127561 tcccttgttt ttttaggaat aattattaaa tttataaat ttaaatttcc acccgTTTT  
127621 tgcgTTTTac ataatcttTg cttaaaggat ttaattcatc tttgctttct tttatcattt  
127681 tttcataata ttctatttta aaatcaagtt tttctaagat agtttgaagt ttttgcatat  
127741 ctttttagcgt tttttctttt aaatttaaaa taatatccag cttttctttt accatgcttt  
127801 cacctttgac acaaagtgca atatagtctt ttaaattcctt aaagctcatg ccaatttagc  
127861 ggtaacaatc cacccaaaat cttagtgcc tactaggaac acccgTTTT tctccacttt  
127921 tataattgtg taagccaaat ttactctttt ataattctta ctttaaaatc gcctttttgc  
127981 attttcaaaa gctctaaatt tccttgtatt tttccaaaa aactaaatc ttcatttgca  
128041 ttttgaagct cataaaaaat gcctatattt cccaaggca cataataaaa caaatccca  
128101 atttgaggTt tatatgcact acttcctttc gcatttaatg ctttgggcaa atgtgcgatt  
128161 ttttcttttc ctataaaatc actaaattct aactccaagg gcaaggTgtt gtaaaactgc  
128221 cttgaagcct cattttgttc taaatttaca agcaattcct tgccattaaa aagtaatttt  
128281 atttgcatct ctctccttag taaaaaattt aagcacatta agcataaaat taatattttc  
128341 atcacaattt aagcctttaa agtcaaacta tctaacacag caatagcatt tagcgcctt  
128401 ggatagccaa tgtaaggaat aagagctgca atgatattta gcaaatcttc tctactttgc  
128461 cccatgttaa gattacctga aatatgggct tttacttgat tatccactcc accaagcgag  
128521 atgaggTata caagcgttaa aagctctcta gtttttaaat caagtccatt tcttTgtgaa  
128581 taatcccaa agcaatttgc acttaaaaaa tcattgacaa aagctttatc ttttggggta  
128641 gattctatca ttttggTgat atttgcctca ccaaaaatag cattttgcac ttctctgcct  
128701 tttatTTTgc gattttcttc cgtagtgtg ctttTgtggcg ctaaaggtag ctcaatctct  
128761 aatTTTTtaA aaatatcatt gcaaagactt aaaaaatcac gcaccctagc aaagcccaca  
128821 taaggagtag cttgataaat cacttctttg atgctaattg ggcttatatc gttattgatt  
128881 gcgcctttaa gcaaggTTTT aaactctatc cttccaccta ctgccaaagt agaggcaagt  
128941 gtgattaaaa aatatttttc tttatctaaa tttgcctttg taaaactctc gccaaaagta  
129001 aaatttatat ggtgagTaaa atattcttta tcgcttGcaa aaagcaaatc cttttttaca  
129061 ccccctagaa gtctttcaaa aatttctctt gctttttgtg ttaattgcat agttttttcc  
129121 tttgtagttt ttaaagcttg cgaaaaaaga gtgcttgaca ttgcaccaa aagcataaaa  
129181 gtttttacgc ttaaatttaa aaaatttctg cgtttcatta caaaaatcct taatctctag  
129241 cttcttttaa agcattttta tattcttcat catttacaag ctctagccac tctacattct

129301 taccctcgat ctactcgtat agagcaatat gtgctccatt aatagaatct gtagcaccat  
129361 gaaaatgctt cactcctata ggacagctta tcacatcgcc ttttttggca attactgctt  
129421 tttgtccctc tgcttttgtg atgatttctc cctctgttac gattagggtt tgtccttttg  
129481 gatgggtatg ccacgcactt ctagcacctt tactaaattc cactaaacct ccgctaaaat  
129541 ctctccactc atttgcctta aacatcatat ttactttaac ttctccgcta aagattttag  
129601 aatcaccctt aaaactccca tgagttcctg ctttttctac tctttgcata ttttctcctt  
129661 tattggctgt gttggcaaaa acaaaagtca cgctcaatgc taccaaacat aaaatctttc  
129721 tcatctcttt ctttatttta aatttgcttt aaaaaattct gcgattttgc taaaagggat  
129781 tttatctgca ttatcataca aatccacatg attagcattt tttacgatca aaagctcttt  
129841 attatcgctt tttagatttt taaaagcatc ttcgctaaaa tatctgctat gtgcattttc  
129901 tccatgtatc ataagcacag aacattttat ctcatcgctg aattcaagaa taggagcatt  
129961 gataaagcca agcgatgagg tagcattcca cgcaccattt gagttgatcg atcttttatg  
130021 aaaacctctt ttggttttat aatactcca atattctttg ataaattgtg gctcattgcc  
130081 gctaagtttt tgtggtaaag taggcgctag ctcaaaagta ccatttttaa aatcttttgt  
130141 gcgtgcttca tttagctttt tcttttagctc atatcttgct tgtttgtcta agctatcatt  
130201 atatccataa gcattaacc tgctcatatc atacattgta gaagttacga tagctcttat  
130261 cttgtatcc atagaacctg catttaaacg aaaaccacca aaaccacaaa ttcctaaaat  
130321 gcctatttta ctaggatcaa catttgcaag attgcttaaa aatccaccg ccgactaaa  
130381 gtcttctgtg ttgatatcag ggcttgccac atttctagga cttcctccac tttctcctgt  
130441 aaaggaagga tcaaaagcca aaacaacaaa acctgattca gctaaagtct gcgcataaaa  
130501 tcctgaagct tgctctttta ccgctccaaa aggaccacta atcgcaattg cactaagctt  
130561 tttggatttt gcattttttg ggatatataa atcccaacc aaagtatac catagcgatt  
130621 tttaaaactg actttttgta ttttaacctt atcgctttga gtaaaaacct tatcccaagt  
130681 agttgcatac agcatatttg cacctccaat caataaaacc ataagcaata atttaaaaaa  
130741 attattcttc attgtgaagc tccttttcaa aattttcaca attataaaag atgagagtag  
130801 ctctaagtca agaatttttt agcagaattt tcatatatga gtacacatta attatactaa  
130861 tttgataaaa tacactatca aaataagata caaacaacaaa cataaagcac taagggaat  
130921 ctgcatgaaa aaagatataa ataagcttcc gcaattactt agcaatatta tcgaattttt  
130981 aaaaactaat acatttagtc taagtaaac tagtctgat ggacgaataa atctctgtgtt  
131041 taatgaaaat gaaattttga atctaataga gcaaaagttt aatattacta gaccaaatgt  
131101 gcgaaattgg atggatttta gctttgaaga aaatggcaat tttatccctg taaatattaa  
131161 agtaagcact acagaaacta ctgataatct caattgcaaa ttagggattt attatgact  
131221 tacaggaaag ataccaagtt ttgggaatga gattccatgg aagaagtatt ttgaaaatct  
131281 tagctctgat atgacagaaa atgataaaga ttattatttt ttaattatta acaaaaacaa  
131341 tacgaatgaa gtgtttgcta cttactttaa aagtttaaaa agtattaaac caaatggaaa  
131401 caatttacc tttcaagcaa aatgggttga caataaaata atggaaaata gaagctatga  
131461 agaagctaag cgattcttgt tatcatgctt tggaaaatct ttagagaaaa tggcagaagc  
131521 atatcaatat tttcaaacat atttcaacga gttttacgat tctcgttttg atttttatat  
131581 tcaatgcgat aattgcagag caaaaaatca ttgttatata actaatacca taaatggcaa  
131641 gatagttacc cactgtaggt gcaataataa tgaatcttaa ttttaaaatc ttaggtcaag  
131701 ttttcacacc gcaaaatct gtgatggata tgctgacttt ggtaaaaaat aatggcagat  
131761 tcttagagcc tagctgtggc aatggtgat tttttaaaa tctaccacaa aataaagttg  
131821 gaatcgagct agattctagt gtaatagaag atctctgcat tttaaatatt gattttttta  
131881 actatccatt aagcgaaaaa tttgatacaa ttattggcaa tccaccttat gtaagatatg  
131941 cagatataaa ccacgatacg aaaattttgt tatctaactt tagtgccata tttgatgaga  
132001 gaagtaattt gtattttatt tttattttata aaagtatttt gcacttaaaa cctggcggag  
132061 agcttatttt tatcaccctt agagattttt taaaaagcac ttcaagtata aaacttaatg  
132121 aattttattt taaagaagga agtattactg attttattga tttaggagat aaaaaattt  
132181 ttactcaagc acagccaaat tgtgctatct ggcgatttga aaagggaat ttcacgcgaa  
132241 acacaaattg ttttaagagaa tttagttgca ttaatgggca gattctattt acaaaaagtc  
132301 attattttat cccatttttc acactctttt ttgtaaaagt tgggtcggta agtgggtcag  
132361 attctatctt tgcaaatgaa gaatttggga atatggagtt tgtcaattcc acaactaata  
132421 aaacaggcaa acaaaagaaa atgattttatg gagaatatgg aaaaaattgt aatattttac  
132481 agagttttta agggcgatta ttaaaacgaa aaattaaaag atttagttaa tctaattggt

132541 ggcaatgggg cagagattat tataaaagtg atttacctag aatttatgta aatacaaaaa  
132601 caagaaataa aaaacctttc tttttgcaca aatgcgaggc ttatgatggc tcaatttttag  
132661 ctatctttcc aaaatttaaa gttgatttaa taatgttgca acatttgtgt aacaggctta  
132721 atgatattga ttggcaagag ctaggctttg tctgtgatgg gagattttta ttttcccaaa  
132781 gaagtttgca aaattgccta cttgatgaaa gttttaaaga gtttttacac atgacacagt  
132841 caaattaaag cattcattaa acctattacc tcccctttat ctatctcca tagtttctat  
132901 tttaaagtag caaaaaatag tatagtgtag gcttccttagc gagtatgggt ttgcgatttg  
132961 tctatagatc tttttttaat gttacaaaat aaaagatgag taactctaaa tcagcagaat  
133021 gaaagctcac tcataccatc caaagaagct tttattttga tccaaataaa ttagtttttg  
133081 cgtatcttca tcttctaatt caaaatcaaa aatttgcaaa ttttgtttca ttctttgcaa  
133141 attagaactt ttagggataa gtaaaatacc aagcttatag agaaaattta aaataatttg  
133201 cgcaggagtt tttgaatatt ttttagccat acacagtaaa agaggatgat taaaaatttt  
133261 atttttatth gctataaaag gactccaaga ttgcaaaaat atatcatggt tttgaagtgc  
133321 tttgtgtaaa gatttttggt gatataaaag atgagtttcg cattgattaa tcaccgggtt  
133381 tatcgttact ttttgataaa aatcaaaaag taaattttca ttaaatttac tcaactctaa  
133441 agattttata agcttgthtt caaaagcttc ttgcatagca tcataaattt gaaggctggt  
133501 ttcataaggt tcatgaatca aaagcaaatc caagtattct aaaccaagtt catctaaaat  
133561 tttataaatc acatcctttg cttgtaaata acttaaatth tgcgaaatct tactctctat  
133621 aaaaagttcc ttcctagtaa tttgactctc ttttaaaact ttagcaatat ctttatgatt  
133681 tttatacatt tgcgcagtgt caataagacg ataccgcgat tctaaagcat tgtttaatac  
133741 attaaaacat tctcttcctt gcaatctagc tgtaccaaaa cccataatgg ggatttttaa  
133801 accattgtht aaaatttgat atttcataaa ttaaaacctt aatttcatac tttgaatttt  
133861 atctcttaat aaaatcatga caattccaaa gcttagtaaa ataacagaac ttatagcaat  
133921 aaaacgcgta ttgcttaaaag aaatgacaag tccacaaaata gcagtgccga tgctaagtcc  
133981 tatatttgca acgcttataa aaagccatt agtaaaatct tttgctctag gaaaaggatg  
134041 gcttattaaa aatgggttc cattattcat cactccacct aaaatacca aaataaaaagc  
134101 tagtatcatt aaaatcatat tttgataata aaaattaaaa ataagtacat aaattccaat  
134161 catcaacaaa agtgtaaaaa tcaaatttaa attaacattt tttataagca gttttggtgc  
134221 aagattgtht cctataatgt tagcaaaacc ataaagagca agaataatac tgattaaatc  
134281 aaaatttatt ttcgaaatac tcaataaaaa atcagaaaaa taagaataaa atccccaat  
134341 tccagcattg atacaaacaa cacaaagtat gcttatccat aaaagcggat accttaaaat  
134401 aagcaattgc ttgcctatth tgaccttatt ttcttttttg aaattcggca caaaaaataa  
134461 agtagccaca aaggataaaa gatttaaaaa cacaaataac aacatcgaaa tttcaaagcc  
134521 aaaatttcca cccaataac tagtaagtgg cactcctaaa accatacctg cactcacagc  
134581 tgcaaaaatt ttccctacat ttttaggaat atctttttta tccgatgcca aatttgcagc  
134641 catgcttaaa gctagtgcta tatagatagg atgaaaaaat gcaggaatag ctctaaaaac  
134701 aagcaattgc caaaattcac tcacaaaagc agcgattaac gagcttaaga taaatacagc  
134761 taaacaaata agcataagtt ttttgggatt aaaatttgca caaagtagcg ggacaatagg  
134821 agcgcaaaaa gtaatcacia gtgcaaaaat actcacactc caacctgcat ctgaaatact  
134881 tacactaaaa ttttgagaaa caataggaat tatacccatc atccctagct ctgtgcttaa  
134941 aatcccaaat acgcctaac acagcactaa aataattttt atatccgata aagaattaga  
135001 tttttcttga ttcaaagctt gcatttttgc cttttatttt aaaatttttg caattataaa  
135061 agatgagagt agctctaagt caagtggtaa tttataaaat caatatataa atatatcttg  
135121 atatattaat aaattttat t tacactgctc taaaaaattt tttaggaaaa acaatgcaag  
135181 tattttttta cacttttaaa gagtttttgt atctatttgt cgagctttct gtgcttttta  
135241 taggaatttc ttttcttatt agcattatca accaaaaata cgaaggaatg tttagaaaac  
135301 aactgagcgg agataaaatt tcaagctatt ttaaagctat attttttaggt gctttaacgc  
135361 ctttttgctc ctgttctacc ataccgctth taaaagcatt tttagaagct agggtaaaaac  
135421 ttagcgtatg cttggcttat ctttttacct cacctcttat aaatcctatc attttcacca  
135481 tgctttttgt tacttttgggt ttgaaattaa gtcttgtgta tgtattgtht ttggttaatt  
135541 ttatttttat aatttctctt attttttcaa aatttaaaga agagtatttt ttaaaacata  
135601 ctctaaaaaa ctcagcccca agcattttca cacaaaatac taaaaacata ggtaaaatag  
135661 tccttaaac aagctcttgt tgtgccaaca ctcaaagcaa agctaacgat acaaagataa  
135721 atttcaaaaa acttttttaa gaaagtgtta taaactataa aaaattacta ctttatatcg

135781 taatcgcagt gcttataggg gctttgatcc atgattttgt ccctcaagaa attttacaaa  
135841 aatacctaag tggcaatgaa attttaagca ttattctagc agcgtttttt ggagttttac  
135901 tttacttaag agtagaaacc attatcccca taggcttgat acttttgcaa atgggaatft  
135961 ctcaaggggt gattatgagt tttttaatcg cagggtcggg atgctctttg cccgaactta  
136021 ttttacttaa gcaaatgttt aagatgaaat ttttattatt gttttagct atcattttaa  
136081 gcgtagccat atcttttggc atgcttataa atttcatata aggaaaaata aatgcaaaaa  
136141 tttttaacca ttatttcagc gatcaacgat gaaagcagag tgcttatctt ataccatctt  
136201 ttaaaaatc aagaactttg cgtatgtgat ttgcaaaagc ttttaaatat gggacaatca  
136261 agactttcaa gacatttaaa aattttaaaa gacgcagggt ttttatatgt caaacgcaag  
136321 gggacttggg cgtattatgg tatcagtgat gagcttttaa aactgcattc tgatcttttt  
136381 gaaaaatatta aaaatctaga tattgacatt gtagttttag aaaacaatac ttgcaaggat  
136441 gacaaatgaa acttgcattt atttgcattc acaatagctg ccgttctcaa atggcagaag  
136501 cactagctag gcataaagct gaaaaaatgg gcatagatat cgaagtatft tctgcaggaa  
136561 gcgacacttc taagggtgta aatttgcagg ccataagact tatgcgtgaa atttatcaaa  
136621 tcgatatgaa aaagcattat tctaaactta tcgattcctt acctcaaaat ttagatatag  
136681 ttgtaagcat gggttgtggc gtggcttgtc ctagcttaaa atcaaggat tattttgatt  
136741 ttggattaaa agatcctagc ggaagctgtg atgatgagtt taaaaaata attcaaatft  
136801 tagattctaa actgacagct cttttacaag ccataaagac aaatttctt aagggttfta  
136861 gatgttaggt tttatcgata gatttctcac gctttggata tttttagcta ttttttagg  
136921 cttggtttt ggtatcattt tccctgatat cgctttatft tggaafttft ttgaatacaa  
136981 gtctgtaaat gtagtattga ctttatgtct tattttgatg atgtatccgc ctttggctaa  
137041 ggttgattat gcgaagctft caaaggtatt tgattctaaa aaagttatct tgctttctat  
137101 gattttaaat tggtttatag gccctttgct tatgtttatc ttagctttfta ttttcttaaa  
137161 agacgagcct ttatatatgc aaggagttat catcatcggc ttggcaagat gtatcgcaat  
137221 ggtagtggtta tggagcgatt tagcaaaagg tgatagagaa tacaccagtg ctttagtagc  
137281 gatgaatagc atttttcaaa ttttatfttt tccactttg gcttatatft atctggatft  
137341 tttaccaaaa ttactaggtc aaagcactft agccacaagt ttagatatag atttttcagc  
137401 tctaagtaaa aatgftttga tttatfttag aattcctftt ttaatgggct ttataacaag  
137461 aaccctactt ttaaaatata aaagcaaca atggtacgaa aatacctftt tacctaaaat  
137521 cagccctata actcttatca ccctgctagt aactattatc attatgtgtt cttacaaagc  
137581 aatgaagta tttcacctgc ctttagaagc tttaaaaata gcctttgftt tgactttgta  
137641 ttttatcatc atgtfttttc taacttggft tatttctaag aaaaatcatc tttcttatcc  
137701 taaaacttgt tctttatgct ttagcgcaag tggaaataac tttgaattgg ctataatcat  
137761 ttgcattgct acttttgggc ttcactcaga acaagctftt gcaagcatta taggtcctft  
137821 agtagaagtt cctgtactta tcttacttgt aaaatgggca ttgggcaaaa gtttaaatc  
137881 taaaaaatga atcaagcctc atgactctft acaaaactta tcgcaaggft gataatcctt  
137941 gctttctgga ttaaaccat caacttcatt tgcaagcatt tcttcataaa tttttatctt  
138001 tttacttaaa actttttcac tttctfttag agttttgatt tgagtttgta gctttttctt  
138061 tgcttgtftt aacatatctt gtctttctft ggcagttftt atacctaaag agcaaagctt  
138121 tatatagtgt ctgatttgtt cgatttgcatt acctgaaatt ctaagccatt ctatccattt  
138181 tgcccattct atatcgctft ttgaaaaata cttcactcca ttttcatctt tttgcacaaa  
138241 gggaaataaa cttfttttag ccaaaatct tagcgtatgc gagcttattt ttgtttctft  
138301 ttctacttct ttaatagtat aagccattft attttctft cagtataaaa ttatagaata  
138361 tataaggfta atttaaaata atcattagtt agctctfttt taaaagtaaa attaaagtat  
138421 tacaattaaa aagcaatgat taaattatft tttgttacac ttacaaggta agttttftaa  
138481 aactaactta tattttatat catagggggt tcattttatg aatagtataa aaataaagct  
138541 ttcgcttatt gcaaatftaa ttgcaatftt cgctfttaac atftttaggtg ttgtaagftt  
138601 ttactttaca aaaaattctt tatatgaagc aactftttaga gaacaaacta atctactcaa  
138661 aagttcacia aatatagtag aagactfttag atctaaaaat atagttgtgc ttgaaaatft  
138721 agcaaaaagat atfttgagtt tgccttatga ggctcttaac tcgcaagaaa atctcattca  
138781 atatgcaagc ccgatgttga aagactatcg tcatactatt aacgctcttg caacctftat  
138841 tggacaaaagc aatgggtgaaa atgtcatcag tgatggaatc agtgatcaaa agggcataaa  
138901 cgcaagaatc aatggcaag caaacaatta taatgcaact acaagaggtt ggtatcaaa  
138961 tgctatgcaa acagatacat ttgccgcaag tcacctftat atcgatgcag tcaccaaaaga

139021 atttgttatc acttattcta aagctcttta taaagatggt aaatttatcg gggttctagg  
139081 tatagatggt ttattaacaa gctttcaaaa tcaaattgca aaaactccag gaaatgtttt  
139141 tgtatttgat agagaaaata aagtatttgc cgcaaccgat actaaattgc ttgatccatc  
139201 tatagattat tctcctgttt taaatgccta taaagcaaat ggagattata aatTTTTTga  
139261 ttatacccta aacggagatg acagattggg aatttgtaca aaggatattg cttatatagc  
139321 ttgtgctact gaaagtgatg atgttattga taaacctatt gcagaaacag cttttgtcca  
139381 agttatagca gtaattatta taatagcttg tagtgtgctt ttactttact ttattgtatc  
139441 atactacctc tccccactcg cctctatcca agcaggactt aattccttct ttggcttcat  
139501 caaccataaa accaaagata tttctactat tgatgtaaaa actaatgatg aatttgggtca  
139561 aatctctaaa gccatcaacg aaaacatcct tgctactaaa caaggtttag aacaagatgc  
139621 taaagcagta aaagaaagtg ttgaaaccgt aggagtagta gaaagtggta atcttactgc  
139681 aagaattaca gctaactct

//

LOCUS DMACINML\_8 111882 bp DNA linear 16-DEC-2020

DEFINITION Campylobacter species strain strain.

ACCESSION

VERSION

KEYWORDS .

SOURCE Campylobacter species

ORGANISM Campylobacter species

Unclassified.

COMMENT Annotated using prokka 1.13 from  
<https://github.com/tseemann/prokka>.

FEATURES

Location/Qualifiers

source

1..111882  
/organism="Campylobacter species"  
/mol\_type="genomic DNA"  
/strain="strain"

gene

899..5665  
/locus\_tag="DMACINML\_01353"

CDS

899..5665  
/locus\_tag="DMACINML\_01353"  
/inference="ab initio prediction:Prodigal:2.6"  
/inference="similar to AA sequence:RefSeq:ALW56297.1"  
/codon\_start=1  
/transl\_table=11  
/product="restriction endonuclease Eco57I"  
/protein\_id="Prokka:DMACINML\_01353"  
/translation="MGINETTFEIIILEKCLKQANLNTRSKGSMFEKLSKHLLEKEDTAS  
IYKNIYLWDEWDKKGDCGIDLIIQTKDDDYIAVQCKFYESSKVDLKDLSYFSKLQ  
SGVGEIKFSKGIISTSDLTQNAKKEIEQISKNIPIELITLEDFLNSNISWDKFDPNP  
SLELP IIAKKKPREHQIQAINNTKEYFANKNNTRGKLIMACGTGKTFTSLKIIIEITP  
KNSIVLFLAPSIALVGQTFREYCKEKTDDFVASIVCSDSKSGKSIEDDIDILELPIPA  
STDTQSIKKAYDIAKKDNKRFIIFSTYQSVEKIMQAQKQNDLDEIELIICDEAHRSVG  
NLYSGKEKDKLNTFTLCHSNENIKAKKRIYMSATPKIYSSSQKNKALENDNEVFSMDD  
EEIFGDEIYSINFREAVEKGLLTDYKVII LAIKQESIANIANTTIAKLDKKNVDEKY  
VDIDFVSKIIGTHKGLARNDLVALDENNKIDNDFLEEMDSNLSRRVINFCFSIRDSKN  
ITNSFKIIMQCYDEALKKDSFKNLNINIDHVDGTMNSNVRNLNLLNSPEENTCNIL  
SNARCLSEGVDVPALDSVFFDGRNSMVDIIQSVGRVMRKAPNKKTYIILPLALSEN  
ELSNLDEAIKNTNFLNIWNILKALRSHDDTLVDEAVFKEKIKIAVADYVGDNDSSNNT  
DKSYEPSLFDSTLSELANTLYNAIPTKLGDKGYWQSFSAKTAKIVEKLNIRLNIAIFK  
DHPEILEEFLTSLKENIHPNIKEDEAIDMICSHIITKPIFDVLFDKNMDDNPIGKALD  
EVNQKLNTFGLDDEETRSKALYKSVEENVKLAKSQKSKQELIKNLYDTFFRSFAFKKQ  
AEKLGIVYTPMQVDFILHSVNELLRHFNTDFNDENVKIFDPFTGTGGSFITRLLSKE

```

NNLISDENFKNKYENGIFAQDIILLAYYIALINITQTGNERINTLDFKFNIALADSLD
YLDKKIQDSGLFALEFKDLEENKKIKDLIANEKIKVIIIGNPPYSAGASSENNANIS
HPNLEKRIKDTYSKESNAKLAKNTRDTLIQALRMASDKIEDNGIIGFVVNGGFIDATS
ADGFRKCVAKEFSDIYILNLRGNARTSGEQRKKEGDGVFDSGSRASVAIVFVKDTSI
KTNKIHYDIDYLDLDRQTKLDKLENFKSVLNVPFANIIPNEKGDWINQRGGGFNDLMP
LKSINKNEYGIFTINSCGVVTGRDSWVYNSKEKLANSMQTCIATYNEDLAKFDHQAF
EKNKNVKNSELYKQLNDKDITIDNTKIAWTRALKKDFINNEKIKEFNQENIREISHRP
FTKEYLYWNKTWNEEQYQLPKIFPKNTDENLLINTTKGDFSALISENIPDYHFIGDTQ
AFPLYFYQENGSKEYAISDFALDEFKKQLQDETINKEDIFYIYIAIFHHKSYLEKYKF
ELSKAPRIPISKDFKNLSVLGKKLATLHLNENEMFKEVEFKDGVLADIGNDEFYK
VTMKKLGNDIFYNQNITIKNIPSKAFEYRINGKSAIDWIIDRYQISIDKKSLENNP
NDYQGGKYIYELLLKIIDLKSIKSVLMDIEISKMEWE"
gene      5665..8424
          /gene="cobB"
          /locus_tag="DMACINML_01354"
CDS       5665..8424
          /gene="cobB"
          /locus_tag="DMACINML_01354"
          /EC_number="3.5.1.-"
          /inference="ab initio prediction:Prodigal:2.6"
          /inference="protein motif:HAMAP:MF_01121"
          /codon_start=1
          /transl_table=11
          /product="NAD-dependent protein deacylase"
          /protein_id="Prokka:DMACINML_01354"
          /translation="MKKEQYKAFLNTSIENIKKALDENYLSIFAGAGISANGLPTWS
ELINNISKELYGNEKYESDNLVLAEKFYNQFGENYYYQKLFSEFIPDNKQPNDLHKKIV
KLNLKNLITTNWDNLFKEGIDEEGCFYNIKKDEDIGFATGFSKLIKMHGSLDQNV
FKEDDYLYKSDNFPLIENYIKGIFSTDLVLMGYSLSDSNVKQIISWVNSKASNIKPV
YLVKINKKFDKLEFDYKKNKIYILYLDEIYKKNDEYQFLYDFFFENEINNSIDNVLD
LFLGDLDKKYFDLMLSNQEINDKVEDFLQRYKNCKFIIPKLLVQDLKNYFQLSYQEI
NMDSLAIKINNNKLAENIKDET FNKIANLTNTSVYTRCKKYGELKNDFISDMDLLYFN
YDYIEDKIKKLT LKNLSNEEELS LAFWFYQNEHYIQSYNALKRVSKNAFKNKDYTTWF
ISETNRKNFVFRSITEENEIEEIKTYLKEMDKINISEMYLKLPEKNRNEISHIKDFDF
FIGENIIKTYALKEEIEEYNRHIKGGFTFNNNFYLLCNIFSRIVNLEVRLKIIYELK
SIYSNIEGLLIYYSINGLKTENFYKYTKENISIEVELNVFSFAIKYFKSQELKKIFD
KYFKQNYILKLNNKDIDKINKNICKNFTTSGFIATKYSQFLDSFLVISSWVDLAQEN
FELIIDSFNEKLENNLLGINQYDSMNYFLSNQYQKNKLNDFSNITNIIKKYINAF LSG
KLGNNNTLVLQYSNMFYDVKILINKKIKLEDDFNPKISEFIANLKNKNINDKYYCTR
YFLGLLGHIVSKTIRKEIDKFNL E CYNQVRNENKDLTYLELGFCLYGDKKIPKEEYKK
EFFEIKKRTKEEYKKEFFEIKKRTKEEYDKKISKMEFNSSDETMLILD FIEKNEKKIF
GEDNE"
gene      8417..8554
          /locus_tag="DMACINML_01355"
CDS       8417..8554
          /locus_tag="DMACINML_01355"
          /inference="ab initio prediction:Prodigal:2.6"
          /codon_start=1
          /transl_table=11
          /product="hypothetical protein"
          /protein_id="Prokka:DMACINML_01355"
          /translation="MSDIKSINDL FGLNFIIPSYQRGYRLDEIQIRD LLEDIWNFVLI
Q"
gene      complement(9280..9366)

```

tRNA /locus\_tag="DMACINML\_01356"  
 complement(9280..9366)  
 /locus\_tag="DMACINML\_01356"  
 /product="tRNA-Leu"  
 /inference="COORDINATES: profile:Aragorn:1.2"  
 /note="tRNA-Leu(caa)"

gene 9609..11861  
 /gene="flaD"

CDS /locus\_tag="DMACINML\_01357"  
 9609..11861  
 /gene="flaD"  
 /locus\_tag="DMACINML\_01357"  
 /inference="ab initio prediction:Prodigal:2.6"  
 /inference="similar to AA sequence:RefSeq:CAL35008.1"  
 /codon\_start=1  
 /transl\_table=11  
 /product="putative flagellin"  
 /protein\_id="Prokka:DMACINML\_01357"  
 /translation="MRITNKLNFTNSISTSMGAQSSLYQISQQLSSGIKIQNSYEDAS  
 VYIDNTRLEYELKTLQVKQATNSAKEMTQNSMKALQDMVKLLEDFKVKVTPQAASDSN  
 SQTSREAIKELERIKEGIVQLANTSVNGQYLFAGSQVANKPFDSSGNYGDKNNINV  
 VTGAGTESPYNIPGDLFFKADGDYKKQISTNVSFTDNRWNLTENPKTEYLTSSSKW  
 QQLIGQGYVKDNGLDVDKDFEYSDTKLNFPTTLYVQGTRPDGTSFKSAVLVNPEDTL  
 EDVMENIGTLYGNTPNKVVVEISMNDSGQIQITDLKQGNKLDHFHAVAFTPQADDRSE  
 LTGIIIEAAEAEGITMEEVTNRVMAEATAAPSNGDITNLNSPVTVTINGEDFEIDLKQT  
 DFIKSKMTDTDGAANGADYDNVYFEKNGNTVYGNVSQVIKGSNAYATESTKLSEVMA  
 GDSLNGTTLNLKVNSKGGNTYDVSINLQNSTVSFSDPNDPTQTISFPIMHTDPATGNS  
 GVITGANDITYGQINDIIGMFAADKIPTTSINPTNGKIDAVDYQNMQQLMKDSNATVD  
 VSMDYKGRISVTDKLSSGTNIEISLSDSQSGQFPLPPFTTTSNVENGPNFNF SANNSL  
 TIDEPNVDIIKDLMLIDAVLSGNMRRANSESEDPRNTGMQGALERLDHLADHVSKLNT  
 TMGAYYNTIDGVNTRTTFLSVNVQSISNSVIDVDYGEAMMNLMTQLAYQASLKASTT  
 IAQLSLLNYM"

gene 11972..14941  
 /gene="ftsK"

CDS /locus\_tag="DMACINML\_01358"  
 11972..14941  
 /gene="ftsK"  
 /locus\_tag="DMACINML\_01358"  
 /inference="ab initio prediction:Prodigal:2.6"  
 /inference="similar to AA sequence:RefSeq:CAL35007.1"  
 /codon\_start=1  
 /transl\_table=11  
 /product="putative cell division protein"  
 /protein\_id="Prokka:DMACINML\_01358"  
 /translation="MLAPDMGVWIYKANLFLFGEFAYYYPFFLFILNYVYYKRNKLA  
 NFTRRELFGIGFAFFSLLLFAVFYPNNGYILELSYAIIFSIIILGHTGSGIFALVLLFF  
 SFILLFPKTTKELFKIELDFNILLRVENALKALLMRVFGGENEKDDLKIEPKAPVVT  
 LEKNTAPIQEKIQDENENLNLNQTEQLVKYNNINASKNSIITAKENFEKLNQILDEK  
 VEIDKESIKEAKSFIYENSQQVRNFVQKASRMSIKLDEDFNFISEEEVDMIPERFLKP  
 KKLDDIKQIDTNNKNLDEPSYKRKNIIEISVPKQEIKPKIFTKELELRENLMKEAKLEQ  
 EYKAYQNEILENKVQEEIKELEKKDSLELDLNIHQGSKYNFGTLPQEVSSAKEEVKT  
 QNAPIPSILEKTNEVEIIDFDENEIEIKKMESINKSFHDFIPIVEELEHPYIEPTPIV  
 KIEEIKPLDNQINKQIPIQEKNEIIEQGNFSIKEQISQEPSQEITRQKAILAKEIELN  
 KALLREIEQGEIEKPKDFELPPLEFLTNP SHNKQEINESEIDKKIYNLLEKLRRFKIG

GDVISTYIGPVVTTFFFRPSADVKVSRIINLQDDLTMALMAKSIRIQAPIPGKDVVGI  
 EVPNDEIQTIYLREILESEVFKNASPLTIALGKDIVGNFVTDLKKLPHLLIAGTTG  
 SGKSVGINSMLLSLLYRNSPKTLRLMMIDPKMLEFSIYNDIPHLLTPVITDPKKAVNA  
 LSMVAEMERRYRLMAEAKTKNIENYNEKMKELGEEELPFIVVIIDELADLMMTAGKD  
 VEFYIGRLAQMARASGIHLIVATQRPSVDVVTGLIKANLPSRISYKVGQKIDSKVILD  
 AMGAESLLGRGDCLFTPPGTSSIVRLHAPFASEFEIEKIVDFLKDQQSVEYDESFLKD  
 QQSMGVTSSSESMNNGEYDELYEDAKRVILSDGKTSISYLQRKLNIGYNRAANIIDQLT  
 ESGVLSEPNKSGQREIL"

gene complement(15012..15284)  
 /gene="rps0"  
 /locus\_tag="DMACINML\_01359"

CDS complement(15012..15284)  
 /gene="rps0"  
 /locus\_tag="DMACINML\_01359"  
 /inference="ab initio prediction:Prodigal:2.6"  
 /inference="similar to AA sequence:RefSeq:CAL35006.1"  
 /codon\_start=1  
 /transl\_table=11  
 /product="30S ribosomal protein S15"  
 /protein\_id="Prokka:DMACINML\_01359"  
 /translation="MALDSAKKAEIVAKFARKAGDTGSTEVQVALLSARIAELTEHLK  
 IYKKDFSSRLGLLKLVGQRKRLAYLKRKDYNSYSKLITELNLRDK"

gene 15449..15859  
 /locus\_tag="DMACINML\_01360"

CDS 15449..15859  
 /locus\_tag="DMACINML\_01360"  
 /inference="ab initio prediction:Prodigal:2.6"  
 /inference="similar to AA sequence:RefSeq:CAL35005.1"  
 /codon\_start=1  
 /transl\_table=11  
 /product="putative transcriptional regulator"  
 /protein\_id="Prokka:DMACINML\_01360"  
 /translation="MLFTKASEYALLSLIYIAHKENPQDVDSLALLENIPKSFLAKIL  
 QTLAKDNLLKSFKGAKGGFALIKEPSQYSIKEIVNSAEKKEVSVFECSGGVCPNNKEE  
 NCTLMPMLVNLQNKVDEF LDSITLADIMNHNGKK"

gene 15846..18023  
 /gene="flhA"

CDS 15846..18023  
 /gene="flhA"  
 /locus\_tag="DMACINML\_01361"  
 /inference="ab initio prediction:Prodigal:2.6"  
 /inference="similar to AA sequence:RefSeq:CAL35004.1"  
 /codon\_start=1  
 /transl\_table=11  
 /product="flagellar biosynthesis protein"  
 /protein\_id="Prokka:DMACINML\_01361"  
 /translation="MAKNKLVDLVFPFLGPLIGPVLRKSLTIVGFIVCILAIIIVPL  
 PSPILDFFLALSIALSVLIILISIIYIPKPTDLTTFPTLILIIITLFRSLNIATTRMIL  
 SEGQNGPAAVSEIIAAFGEFVVGGMVIGVIVFCILVLIINFMVVTKGSTRVSEVQARF  
 TLDAMPGKQMAIDADL NAGLIDEQTARARRQEIIAEANFYGAMDGSSKFIKGDVAVGI  
 IITIIINIIGGFLIGAFQHDMALSDAASYTILITIGDGLVSQIPGLITSTATAIIITRA  
 SKDEENFAEGTLTQLLSEYRLLIVGFVLFIFALVPGLPHLSLGFMALVFLALGYLTK  
 QVKEGKIEVNAPKKAKASAANAASGAGGAGGVAAPAKKSEEEILKEEHHKINDILKVE



ILELELGYGLIKLAESELERIRSMRRSIAESLGFLMPKIRIRDNLRLKPNEYSFKLK  
 GVSIAAEIYPDKYLAMDSGFITEEIEGIATKEPAFNSDALWIDSNLKDEATLNGYIV  
 IDPASVISTHMSSELIKAHASELLTRQEVQNLDDKVKNDYPIIVEGALGVAPVSLIQKI  
 LKDLLKHNIPIKDMILTILESIDIAEVSKSFDMIIEHVSRASLARMITNMYLDDKGNLD  
 IFILDSASSAVLMENVQFRDGSYHLPLSVAQTGTLVDTLRAEVAAVANGRIKPFILCV  
 EPQLRKFIADICYNFNINIVVLSFAEIAENTNFNTEGIIRIEL"

gene 18032..19084  
 /locus\_tag="DMACINML\_01362"

CDS 18032..19084  
 /locus\_tag="DMACINML\_01362"  
 /inference="ab initio prediction:Prodigal:2.6"  
 /inference="similar to AA sequence:RefSeq:CAL35003.1"  
 /note="hypothetical protein Cj0881c"  
 /codon\_start=1  
 /transl\_table=11  
 /product="hypothetical protein"  
 /protein\_id="Prokka:DMACINML\_01362"  
 /translation="MKIYHLSHTDLDDGYACQYIVNFYFKNVNFYNSNYGKEINENFNA  
 ILADIEKDNSFGQAIILITDLNLDLNQCEEFDKICKEKNIKIFLLDHHQSGEECAQKY  
 AWYLLDNKRCATKITYDFFSKICTPDLELLNFAQVVNAVVDIWLSEDANFELGKVFGL  
 IANAKEINRVMFKEAQVFYMFLLERARKFINQPNSHILLDNAIHFIKKDFFAKNCDD  
 TLSNLISYFVVEKLELSELKEEFSIEYEGHKGILTSNIGNTSVIGNEFLVKNPDYDFID  
 VSSRKTLSFRANGKVDVSLMAKKLVGSGGHKNASGGLFAAYKDGANYNYIKAQIVDLI  
 KSKELKKGNSDATNTQ"

gene 19065..19307  
 /locus\_tag="DMACINML\_01363"

CDS 19065..19307  
 /locus\_tag="DMACINML\_01363"  
 /inference="ab initio prediction:Prodigal:2.6"  
 /inference="similar to AA sequence:RefSeq:CAL35002.1"  
 /note="hypothetical protein Cj0880c"  
 /codon\_start=1  
 /transl\_table=11  
 /product="hypothetical protein"  
 /protein\_id="Prokka:DMACINML\_01363"  
 /translation="MPQTHKNLKNLEDLRYELSLVLEAMLLYAGVKREKLESAIEA  
 YIDNIDSVLENSNKEGVDEVLEVVEFLKNQHPELFQ"

gene 19304..19936  
 /locus\_tag="DMACINML\_01364"

CDS 19304..19936  
 /locus\_tag="DMACINML\_01364"  
 /inference="ab initio prediction:Prodigal:2.6"  
 /inference="similar to AA sequence:RefSeq:CAL35001.1"  
 /codon\_start=1  
 /transl\_table=11  
 /product="putative periplasmic protein"  
 /protein\_id="Prokka:DMACINML\_01364"  
 /translation="MKKILPILIGFCSLSFANVYEKLNDFAYEKKPNKDFKIQEVKLV  
 QFSQNNKNCLDLLIEAGQVRILKSYNECQKLSKDADFQKFLNEDFLTLYKNNGYFINE  
 NLQDLKAMQDVMIIYKLRFAFSKNIQDMSKNKNSILNIDEKEGGTLLYKINNQACV  
 GIELIRHNSRMAMKVYGMENLDKECKLFIQAPSFKNISFTKNDFKWWYLE"

gene complement(19924..20064)  
 /locus\_tag="DMACINML\_01365"

CDS complement(19924..20064)

```

/locus_tag="DMACINML_01365"
/inference="ab initio prediction:Prodigal:2.6"
/inference="similar to AA sequence:RefSeq:ADN91049.1"
/codon_start=1
/transl_table=11
/product="hypothetical protein"
/protein_id="Prokka:DMACINML_01365"
/translation="MKNLSVQEKKDLNCFVFKTLGKKEPSALVLLFKKILLKLTFFY
SK"
gene complement(20184..20822)
/locus_tag="DMACINML_01366"
CDS complement(20184..20822)
/locus_tag="DMACINML_01366"
/inference="ab initio prediction:Prodigal:2.6"
/inference="similar to AA sequence:RefSeq:AAW35290.1"
/codon_start=1
/transl_table=11
/product="thiol:disulfide interchange protein DsbA,
putative"
/protein_id="Prokka:DMACINML_01366"
/translation="MFKKMTKILTSLSLVCTFAMADDFITLSETLPDSKNSVVEAFSY
KCIHCYNHHKFGTLEKLREAFPNLHFKLYPVSLMNGEYANELNELFAFAQFKDEQNGK
DASYSDSLSHKLADVVFVYFINKQDNFSSSDEFYDIGLKAMNVDKNEVLNFLSTPKA
KEILNEFKRANDIARTYGTAPFVVGKYQINPSAISSMQALEDIVKKLSNMP"
sig_peptide complement(20757..20822)
/locus_tag="DMACINML_01366"
/inference="ab initio prediction:SignalP:4.1"
/note="predicted cleavage at residue 22"
gene complement(20911..21606)
/locus_tag="DMACINML_01367"
CDS complement(20911..21606)
/locus_tag="DMACINML_01367"
/inference="ab initio prediction:Prodigal:2.6"
/inference="similar to AA sequence:RefSeq:AHY40088.1"
/codon_start=1
/transl_table=11
/product="disulfide oxidoreductase"
/protein_id="Prokka:DMACINML_01367"
/translation="MKNLYWIDCFKQDMRNPWFIMSIIIMISLVLIAHFLFQEYLYM
RPCEQCVYIRLDMLIIALGGIIALINPKNTIIKILAYTLAFYGIWLGLEHSLNLRNH
EAISTENPFGVNGCRDIPLYPFNLPLHEWFPSWFKPIGQCGMDFPMVPKSAYLNAFQ
EFFVGKNGLYSNGWYLIPSLKFMNMATCCFIAFLCSFILLFIMFVSYIFSQRKIIFTI
ITIGLVLTILG"
gene 22233..23297
/locus_tag="DMACINML_01368"
/locus_tag="DMACINML_01368"
/locus_tag="DMACINML_01368"
/inference="ab initio prediction:Prodigal:2.6"
/inference="similar to AA sequence:RefSeq:CAL34991.1"
/codon_start=1
/transl_table=11
/product="DNA recombinase"

```

```

/protein_id="Prokka:DMACINML_01368"
/translation="MKYPLDCEENFEKSFLFWLAKYVKFKLNSLSNKKELKNPKALAEV
NFALTKGVKNIEELDALAKKARNAGLNGVNTYFNPLKVKFEYLNFYKHLHSLKQIDEEL
IVEVLASITGALSDASKKNYRIAVINFFDFLDKQNEEDEKAHIFDIVLKNWGGITGNK
GAKLPEFMNEDELKFFLEAIENSDFKNNTIRNKLIIKIIIFTGIRVSEAINIKLKDIS
EENELYIIRIRAKGNKYRVMIKKELIEHLLKDVRVNYLSEDGLL FVNRNGKALTQAY
VSRIVEQILFRAGIRKQKNGAHMLRHTFATLLYKKQKDLVVLVQEALGHASLNTSRIYT
HFDNDKLLAAQVAKELSER"
gene 23287..25065
      /gene="pabB"
      /locus_tag="DMACINML_01369"
CDS 23287..25065
     /gene="pabB"
     /locus_tag="DMACINML_01369"
     /EC_number="4.1.3.-"
     /inference="ab initio prediction:Prodigal:2.6"
     /inference="similar to AA sequence:RefSeq:CAL34990.1"
     /codon_start=1
     /transl_table=11
     /product="para-aminobenzoate synthase component I"
     /protein_id="Prokka:DMACINML_01369"
     /translation="MSAETNFAIFGKYFYDCLKFVLKAYNKKQSKKYFKFVQKHKDKY
YFLTLVDYEFYKYLQDKNFTSKEAYLSFYAYKKRKKFSAMSIDEENFMPIFKNHLDFK
NYEKNFLQVKSAIAKGRSYQVNLQSFHFDSLDDGFSLFNLLSKRQDTEFKAYIKDEG
REILSFPELFFKTHKRKIITQPMKGTARSKDLNQQDKKNKFLQKDVKNLSENMIV
DLLRNDLSKLVKNSMKTFLFKIQSYPTLHQMTSIIKGLKDKIDYQIFKALFPCGS
ITGAPKLETIKLIEELEARKRGIYCGAIGCIHKNKSKFSVAIRTLEKKQDYQYSVGS
LVWDSKLEEEFKELELKTQFLMPKDFYLFETMYKKGKILFFKEHLQRILNSALKLNF
NTEKLVKDFQEVLSYKSNLKEFKNFNIQALNEKLFHKNHSFFYPSTIKSHHKQAIKFL
ILQKDGSYTILENHIKTSDDNILLLSNKSLNSQSDSLYHKSSLRQIYDEKAFWLKENQ
CFDIAFFNEKNELCEGSRSNIIKDKVFYPTPLQSGLLNGIYRQFLDLGLIKEKRL
FKEDLLNADEIYCINSVRGLQKVSLK"
gene 25062..25640
      /locus_tag="DMACINML_01370"
CDS 25062..25640
     /locus_tag="DMACINML_01370"
     /inference="ab initio prediction:Prodigal:2.6"
     /inference="similar to AA sequence:RefSeq:ARJ52894.1"
     /codon_start=1
     /transl_table=11
     /product="glutamine amidotransferase"
     /protein_id="Prokka:DMACINML_01370"
     /translation="MKKILLIDNYDFSYSYTIYVYFKELGYQCKIKNDEFKAKDLTR
FDFSHLIISPGPNSPAESKLSLKAIQYFKDKKILGICLGHQCIGEVFGGKITPMPYP
MQGKISRHLHLKNAKKSLLFKGIENKSQICLYHSLHISKMPKSCEILALNDENIIMAI
KHKKYEIYGVQFHPEAILSQNGKLLKNFMKI"
gene complement(25637..26497)
      /locus_tag="DMACINML_01371"
CDS complement(25637..26497)
     /locus_tag="DMACINML_01371"
     /inference="ab initio prediction:Prodigal:2.6"
     /inference="similar to AA sequence:RefSeq:CAL34988.1"
     /codon_start=1
     /transl_table=11

```

```

/product="putative integral membrane protein"
/protein_id="Prokka:DMACINML_01371"
/translation="MGVFLVLLGGIFWAIISGVLAEYLFKNNYGVDWVSFYRLFCTGIV
LILYSLKKIKIFQFKDELSSFLIFAFFGLLMTQYGYFKAIFYTDAGTATMIQYCAPL
LIMIYVCIKDKKMPKIFESMALIFIILALFLLASGGDISNLLNLWGIWFMAILGAFGV
AFYSLGARKIIAKYGIFFVMGWSSLIASFILFGILEFKEGLVHYDFALNLYLAQAGII
FIGTIGAFCLYLKGV EYIGALRSMIACIEPVAAAFMSFLFLGTRYSFLDLFAFALII
LSVILNAKKS"
gene 26688..27944
      /gene="murA"
CDS   /locus_tag="DMACINML_01372"
      26688..27944
      /gene="murA"
      /locus_tag="DMACINML_01372"
      /EC_number="2.5.1.7"
      /inference="ab initio prediction:Prodigal:2.6"
      /inference="similar to AA sequence:RefSeq:CAL34986.1"
      /codon_start=1
      /transl_table=11
      /product="UDP-N-acetylglucosamine
1-carboxyvinyltransferase"
      /protein_id="Prokka:DMACINML_01372"
      /translation="MTYLEIQGSQKLQGEVTISGAKNAALPLIASSILAKNEVKINNV
PNVADIKTLISLLENLGAKTDFKENTAYLNTTTLDKTVAKYDIVRKMRSILTLGPLL
ARFNHCEVSLPGGCAIGQRPIDLHLSALEKMGANIEIKQGYVVASGNLKGAIQILFDKI
TVTGSENIIMAAALAKGKTKLVNVAKEPEVVQLCEVLNAGLDIKGIGTDELEIYGTD
KELDFKEFSVIPDRIEAGTYLCAGAITNSKITLKKVNAEHLGAVLAKLHQMGFETSV
DNDNITLFPAGEIKATEIMTSEYPGFPTDMAQAFMALALMAKGTSIIDERLFENRFMH
VSELLRMGADIKLNHGIATIVGGKELNAADVMATDLRASSALILAALVAKGTSRIHRI
YHLDRGYEKLEEKFKALGAKITRLEE"
gene 27941..29107
      /gene="moeA"
CDS   /locus_tag="DMACINML_01373"
      27941..29107
      /gene="moeA"
      /locus_tag="DMACINML_01373"
      /inference="ab initio prediction:Prodigal:2.6"
      /inference="similar to AA sequence:RefSeq:CAL34985.1"
      /codon_start=1
      /transl_table=11
      /product="putative molybdopterin biosynthesis protein"
      /protein_id="Prokka:DMACINML_01373"
      /translation="MKNIFQTLAHLQDQITALNEFELISLEEAKDRVLA KDLYAVKNL
PSFDNAALDGYAFNYADINQALDIKGTILAGDKNTYEIYKNECFKIMTGAKMPKNANT
ILMIEDEHIEEGKLIKKPPKQYNAYRYKGEELKKDEPLKKGTRLNARHIALSSQG
LYKIEVVRKIRVGI FSSGDELKEPWQDCDEENIYNANALPLLALFEDCATSYLGIKD
DFNTTKALENANFDLLITSGGASVGEADFMKALNELGFAPL FKGLKARPAPTKLY
QKDKTLVLI LPGNPMAAYLSAFIFARKIIALLYGNLENSLQIQAIMGSDLKVKSGRNN
LILGNLEKGIYPFNDNKFSGMILPLIQSEFLLISEEEKA EFQKDEKILLFKL "
gene complement(29225..29299)
      /locus_tag="DMACINML_01374"
tRNA complement(29225..29299)
      /locus_tag="DMACINML_01374"
      /product="tRNA-Gly"

```

```

/inference="COORDINATES: profile:Aragorn:1.2"
/note="tRNA-Gly(gcc)"
gene complement(29371..31305)
/locus_tag="DMACINML_01375"
CDS complement(29371..31305)
/locus_tag="DMACINML_01375"
/inference="ab initio prediction:Prodigal:2.6"
/inference="similar to AA sequence:RefSeq:CAL35009.1"
/codon_start=1
/transl_table=11
/product="ABC transport system ATP-binding protein"
/protein_id="Prokka:DMACINML_01375"
/translation="MALIDLIDASKKFGKIVLNEANFSANEKIAIIGKNGEGKSS
LLKALLGTLTLDGRVVRQNGKSIAMLSQTVDFNANLSVKEAIKIELEEIYNTLKEYE
ALQSKLEKEPTNKDYLKQIDDLIALIDSKDAWNIKAKITRVLKEFSLLDYSRDLVCTL
SGGEIRRVLGICILLKPNPDIILLDEPTNHLVDVMTSFLDLLKNSKMCVIFISHDRYF
IDAIHRCVEVDQGKLSVFKGGYANYLEKKTQILESLAKSHETLLKHLKSEEWLRRG
VKARLKRNEGRKERIFKMREEAKKNPGAIRKRLKLEISRAALNFTGEKIPNRKMLFEL
KNVSKNLGEKALFTDFSSRILQGERIAIVGKNGCGKSTFLKILLGELKQDSGEIKRGE
IKIGYFDQARSLVNSDKTLLEIFCPNGGDRVEVRGKNMHVYGYLKNFLFPKEFLDKSV
SVLSGGEKNRVALALLFTEEYDVLILDEPTNDLDIATINILEEYLLSFEGAILLVSHD
RYFVDKIATKLYAFESGAKINILHTLYTEYLENEKEMQEFDDYISSNLQQEQTHTQK
EKNSKLSYKENEILKNHPEKIEMLEKQISKLNDDLNSPSVYQEIGINTLYKELEQAQ
KELEKLESEYFEVLEKSENL"
gene complement(31314..32597)
/locus_tag="DMACINML_01376"
CDS complement(31314..32597)
/locus_tag="DMACINML_01376"
/inference="ab initio prediction:Prodigal:2.6"
/inference="similar to AA sequence:RefSeq:CAL35010.1"
/codon_start=1
/transl_table=11
/product="putative sensory trasduction histidine kinase"
/protein_id="Prokka:DMACINML_01376"
/translation="MLKTKNIFIAFFVLLILSFGVIFYTLTNSYLNFLLLKQYEQKIK
SLDDVLKFSLLKHLNSDNIKEFAQDTRADFIILKDDFEISSVLNADLFLNLKENTIYD
LNSKRILVKNFTYKDYKYMIIIVYPRFLNLQNFWLKISISFGLYFMLVFILVFFMGRKL
AKSFKKILEFLNFINDSKSVILEDSEIFKELNLLNKKLLKTKEKILKNTQKNKKQSDKI
ALKNTQLASVISASISHELKNPLSVIELSLEMLKDENLKDEKLLKELLEKISRQSLKLN
ALTHKLNFFVNLNHEALQMDFDLFALCEKIVKNPGFERVILRGKSTKVKADEFLIEQ
VIINLLSNALKYSQKEVILIAQDQKISVLDFGKGIEEDQLKLITKFKYKINTKSDNSF
GLGLFLVKKILSIHKSYLEISSTVSQGSKFSFKLH"
gene complement(32591..33262)
/locus_tag="DMACINML_01377"
CDS complement(32591..33262)
/locus_tag="DMACINML_01377"
/inference="ab initio prediction:Prodigal:2.6"
/inference="similar to AA sequence:RefSeq:ABV52426.1"
/codon_start=1
/transl_table=11
/product="putative sensory transduction transcriptional
regulator"
/protein_id="Prokka:DMACINML_01377"
/translation="MYNMSKSKILIIEDDTLDLNDLLSLRLKACDYQIFSLDFKEVED

```

```

LLDNEQIDLLIVDRNLPSGDSLDKIKELRKQGYKEAVIFLTAKTLHQDLLLEGFESGCD
DYMCKPFDNFNELLRIKAILKRHKREEERLVFKDFSLDLINYEFFYKNEKLDISNLEY
ELLKCFENPNTLLTRQFLSESVWKDDTTSDKTINIALTRLRNKFPKLKEYIISVRGI
GKIC"
gene      complement(33240..34823)
          /gene="serA"
          /locus_tag="DMACINML_01378"
CDS      complement(33240..34823)
          /gene="serA"
          /locus_tag="DMACINML_01378"
          /EC_number="1.1.1.95"
          /inference="ab initio prediction:Prodigal:2.6"
          /inference="similar to AA sequence:RefSeq:CAL35012.1"
          /codon_start=1
          /transl_table=11
          /product="D-3-phosphoglycerate dehydrogenase"
          /protein_id="Prokka:DMACINML_01378"
          /translation="MKKKIIVCDAILDKGVELLRKAEDIELIEAAKVPKNELMDMLAD
VEVAITRSSTDVDANFLNHAKKLKALIRAGVGVDNVDIPECSKRGVIVMNVPTANTIA
AVELTMAHLLSSARSFVNAHNFLKNERKWEREKWYGVELMGKTLGVIGFGNIGSRVAI
RAKAFGMKILAYDPYISASKITDLDMEQAKSLDEILTQSDFITIHTPKTKETNGMIGI
NEIAKMKDGIIRLINCARGGLYTEEALCEGLKSGKIAWLIDVFEKEPATNHPLLDFFEN
VSVTSHLGANTLESQDNIAREACEQALSAARGVAYPNALNLPKTEDLPPFVAPYIEL
VSKMAFLAVQIDKNPIKSIKLEAEGVIGEYATSMFTFAAVGALSGILGEKINYVNAEF
VAKEKVDLSCETLPNSGYNNKLSVKIITENSNINVSQVFNENEQRIVGLNGFQTFD
KPKGKMIIFKNKDIPGVIKISSVLASKNINIADFRGRDGFYALAVVLIDEKVQKE
VLEELRQLEACIFVQYVEI"
gene      complement(34820..35311)
          /locus_tag="DMACINML_01379"
CDS      complement(34820..35311)
          /locus_tag="DMACINML_01379"
          /inference="ab initio prediction:Prodigal:2.6"
          /inference="similar to AA sequence:RefSeq:CAL35013.1"
          /codon_start=1
          /transl_table=11
          /product="putative periplasmic protein"
          /protein_id="Prokka:DMACINML_01379"
          /translation="MMKKYATISILSILLILLIVFVLLWKFKANSNFIPEFAKDTN
THQIEKKQTRLSWQEELAKWPSKDFTPAVEQFTLHFADTSELKEKNKYYQLVVSQY
DIYSMFCLRQTLNSFNVKYFLLKSGESPEIFIDTGNKNLIDDIKELKYYKIHTEAKE
IWL"
gene      complement(35311..36981)
          /gene="rpsA"
          /locus_tag="DMACINML_01380"
CDS      complement(35311..36981)
          /gene="rpsA"
          /locus_tag="DMACINML_01380"
          /inference="ab initio prediction:Prodigal:2.6"
          /inference="similar to AA sequence:RefSeq:CAL35014.1"
          /codon_start=1
          /transl_table=11
          /product="30S ribosomal protein S1"
          /protein_id="Prokka:DMACINML_01380"
          /translation="MSEVNKKVQNNLEDYLEDEDFGQLLEAFDKSREETITEGVIVEI

```

KNDEVYVDIGRKSEGILALNEIQDENANLLFKVGDSEIKVAVIGSRGGRSLLSHKKALR  
 KEKVIEFIQNYKEDDEYIFEVKVVGNKKGGLVVNDDDEFFLPKSQYGFKENNNIIG  
 KTFKVKIIVKDEEQSIIIVSRKKTLDDEKRRKELINNIAQQEGLIEGVVKKITTYGM  
 FVDVGGVDGLVHYSEISYKGPVNPISILYKEGDKVPVVKVVKYDKDRKHLSSIKAALPD  
 PWGEIKDSLEVGDITKIVISNIEPYGAFVDLGNIEGFLHISEISWDKNIKPKDYIS  
 KGQEIDVEVIEINSDERRLRVSLRNLLSKPFDEFMKSHKIGDVEIEGVTSTTSFGAFV  
 KIGSVEGLLHNEDASWRNEKCKDKFNNGDIIKVKIIDEEGQKISLSIKELSESPV  
 QEYAKNHKVGDIVKGIKIRDIKDFGVFVELNKNVDALIHKEDISASTLENLKIGDEIEA  
 AIAFIDEKKNRIRLSVKNLVKKIKEREVLNEINDDKVTLGDIKQDLA"

gene complement(37121..37951)  
 /gene="ispH"  
 /locus\_tag="DMACINML\_01381"

CDS complement(37121..37951)  
 /gene="ispH"  
 /locus\_tag="DMACINML\_01381"  
 /EC\_number="1.17.7.4"  
 /inference="ab initio prediction:Prodigal:2.6"  
 /inference="similar to AA sequence:RefSeq:CAL35015.1"  
 /codon\_start=1  
 /transl\_table=11  
 /product="4-hydroxy-3-methylbut-2-enyl diphosphate reductase"  
 /protein\_id="Prokka:DMACINML\_01381"  
 /translation="MIIELAKNYGFCFGVKRAIKKAEQIKDAATIGPLIHNNEEISRL  
 QKNFNVKTLNIRALSDEKKAIIRTHGITKQDLEELKKKIDIEIFDATCPFVTKPQQIC  
 EQMSAEGYDVVIFGDENHPEVKGVRVSYVTTKAYVVLDDKKELEDIKLPNKIAVVSQTTK  
 KPEHFMEIVNFLILKVKVVRVNTICDATFKNQDAIKELSVKSDVMVVVGGKNSANTK  
 QLFLIAKANCEDSYLIETEEELQKEWFLNKTHCGISAGASTPDWIIKKVIAKIESFKC  
 "

gene complement(37941..39221)  
 /gene="aroA"  
 /locus\_tag="DMACINML\_01382"

CDS complement(37941..39221)  
 /gene="aroA"  
 /locus\_tag="DMACINML\_01382"  
 /EC\_number="2.5.1.19"  
 /inference="ab initio prediction:Prodigal:2.6"  
 /inference="similar to AA sequence:RefSeq:CAL35016.1"  
 /codon\_start=1  
 /transl\_table=11  
 /product="3-phosphoshikimate 1-carboxyvinyltransferase"  
 /protein\_id="Prokka:DMACINML\_01382"  
 /translation="MKINALESFNTEISDIAADKSISHRFAIFSLTQGENKAKNYLL  
 AEDTLNLTIIENLGAKVKREGSNVSIIPPSEILSPNCVLECGNSGTAMRLMIGFLAG  
 VSGFFVLSGDKYLNRRPMKRICKPLSEIGAKIYGREQANLAPLCIEGQKLKAFDYKSE  
 ISSAQVKTAMILSAFRADKTSKFSEISLSRNHSENMLKAMNAPLKISEDNLSLEISPL  
 NQALKAQDILIPNDPSSAFYFALAAIILPNSKVVLKNILLNPTRIEAYKILQKMGAKL  
 EIKITQNDFETIGEIHASSELKAVEVKENIAWLIDEAPALAIAFALAKGKSKLINAK  
 ELRVKESDRIAATVENLKLCGVNAKELEDGFEIEGSQIKKAKIKSYGDHRIAMSFALL  
 GLLCGMEIDEGECIKTSFPNFMIDILAKIGARIDY"

gene complement(39218..41539)  
 /gene="pheT"  
 /locus\_tag="DMACINML\_01383"

CDS complement(39218..41539)

```

/gene="pheT"
/locus_tag="DMACINML_01383"
/EC_number="6.1.1.20"
/inference="ab initio prediction:Prodigal:2.6"
/inference="similar to AA sequence:RefSeq:CAL35017.1"
/codon_start=1
/transl_table=11
/product="phenylalanyl-tRNA synthetase beta chain"
/protein_id="Prokka:DMACINML_01383"
/translation="MIITKSWLSDWLDKFEDKSLDDIAHTLNSIGIEVDRICTLKVPDK
IVVGFIEKIKHENS DKLSICQVDVGSEILQIVCGAQNVAQQGFVAVALK GALMPNGM
EIKEAKLRGVDSCGMLCSSTELGF EKINDGIMLLDDSIGELELGKALNSYEIFNDGLI
EVELTPNRGDCLSIYGIARDLAVALN LNLKEKPPFKEGENVLGIGRILRLSAEKELNS
LYNYRAIELKEKIQTNLLISLRLAQVENFGKNPIENLLNYATHSTGVLFNAYDLNSFY
KENEFTFNLVKEIHGETKISCQDELLSVSGIYQEEKFKCKEDSKIIIEANYTDPMI
IADAKMSYKKQDEQTIYRSFRGSEPKLNLGMDFLLSVLEKNPDLIIYSSSQQVITSKE
LPNIPISIESISKTIQGEVDKDEVLKILKKG FELIISADGLVNVKAPMHRPDIKNLA
DICEEVRIIGIDNIASKGLEFVEKNRLNSTYK NYKELVELRKKAVANGYFESLHYVL
DNEEELKSLGFNPIKLLKLNIPITAE LNTLRTLLNHLNNAASLNAKNSKKIIKLFELG
VVFSGNNEELNHIAFVHSGYKEEPKISNKAKPELANFYDFLLDLKNIIGDFLKLKASKH
DILSPYEQADIYLDKLGIFAGRLHLKIENERDLLKTYICELDLNLIKQHFKLAKPYS
KFPSISRDL SILIPKGF EYEKIKNCIEELDLENLENFRLVDLYSDASLENSYSLTLKF
VFRDMNKTLEEAQVAEHMDKILQSFKEMGLELR"
gene complement(41536..42528)
/gene="pheS"
CDS /locus_tag="DMACINML_01384"
complement(41536..42528)
/gene="pheS"
/locus_tag="DMACINML_01384"
/EC_number="6.1.1.20"
/inference="ab initio prediction:Prodigal:2.6"
/inference="similar to AA sequence:RefSeq:CAL35018.1"
/codon_start=1
/transl_table=11
/product="phenylalanyl-tRNA synthetase alpha chain"
/protein_id="Prokka:DMACINML_01384"
/translation="MQNFIEQIQCKSLNDLEALRVAVLGKKGILTESFAKLKNLAGE
EKKEFAAKLNSQKDAFNEAYLLKFKALENLAL EEMKQDALDFNYFDESPTNGALHPV
MSTMDRIIEYFVSLNFSIEKGPLIEDDFHNF EALNLPKSHPARDMQDTFYFDDKRLLR
TQTSPVQIRTMLAQKPPIRMIAPGAVFR RDFDITHTPMFHQVEGLVVEEGQRVSFANL
KSILEDFLRYMFGDVKVRFRPSFFPFTEPSAEVDISCVFCKGCGCRVCKQTGWLEVLG
CGVVDPNVFNFGYKDVSGYAFGLGVERFAMLLHQIPDLRSLFEGDLRLLEQFR"
gene 42649..43014
/locus_tag="DMACINML_01385"
CDS 42649..43014
/locus_tag="DMACINML_01385"
/inference="ab initio prediction:Prodigal:2.6"
/inference="similar to AA sequence:RefSeq:APA79311.1"
/codon_start=1
/transl_table=11
/product="HIT-family protein"
/protein_id="Prokka:DMACINML_01385"
/translation="MKEKTVFELIVEGKIPC NKVLENNDFLAFHDIAPKAPIHILIIP
KKHFKDFQEFDPKLMKMTSFIQELAVLLGV DKSQYRLVTNCGKNSGQEVFHLHFHML

```



gene GGFKLPKEKDENENPQALF"  
 complement(43051..43620)  
 /gene="thiJ"  
 /locus\_tag="DMACINML\_01386"  
 CDS complement(43051..43620)  
 /gene="thiJ"  
 /locus\_tag="DMACINML\_01386"  
 /inference="ab initio prediction:Prodigal:2.6"  
 /inference="similar to AA sequence:RefSeq:CAL35020.1"  
 /codon\_start=1  
 /transl\_table=11  
 /product="4-methyl-5(beta-hydroxyethyl)-thiazole  
 monophosphate synthesis protein"  
 /protein\_id="Prokka:DMACINML\_01386"  
 /translation="MSKKVLIPLAQGFEEAEFIGIADVLKRAAELSGNLEVIIASLDN  
 ELLVKGANGISIKADCSLEAVDTKNLDAIALAGGFDMNNLKNSNEILSIIKKLHSEG  
 KIVSAICASPIVLNAAGVLEGEFTCYPSCEAGLKGNRVNKAVVVNKNVITSAGPATAI  
 LFGLELAKHLCSDEIYNSLYEGLLIPLTK"  
 gene complement(43613..43753)  
 /locus\_tag="DMACINML\_01387"  
 CDS complement(43613..43753)  
 /locus\_tag="DMACINML\_01387"  
 /inference="ab initio prediction:Prodigal:2.6"  
 /inference="similar to AA sequence:RefSeq:CAL35021.1"  
 /codon\_start=1  
 /transl\_table=11  
 /product="small hydrophobic protein"  
 /protein\_id="Prokka:DMACINML\_01387"  
 /translation="MIVLDFVLIIFVLFMIFLIVGFNYQMNEKARIREEKFKNKERK  
 NE"  
 gene 43864..44607  
 /locus\_tag="DMACINML\_01388"  
 CDS 43864..44607  
 /locus\_tag="DMACINML\_01388"  
 /inference="ab initio prediction:Prodigal:2.6"  
 /inference="similar to AA sequence:RefSeq:CAL35022.1"  
 /codon\_start=1  
 /transl\_table=11  
 /product="putative amino acid ABC transporter permease  
 protein"  
 /protein\_id="Prokka:DMACINML\_01388"  
 /translation="MNQKNVRIFVFFAIIILFWGYFSFPIEILQIKEADGTINYGYTPN  
 AQAYIKSYFITLLL TACSAIIGVVIGFSLAILRFSKIKVLFNFIIDEYIDIIRGTPVIL  
 QLMIFAFVIFTFIDNLYAAIFALGLNSSAYIAEIVRSGINSVDKGMQAARAMGLDYK  
 TSMKEIILPQATKNILPALANEFISLFKETSVMGFISVIDITMQSQSLQAVLYNPKPL  
 IFTGLVYYMSVKIFSFAKKLELRMSKND"  
 gene 44600..45328  
 /gene="glnQ"  
 /locus\_tag="DMACINML\_01389"  
 CDS 44600..45328  
 /gene="glnQ"  
 /locus\_tag="DMACINML\_01389"  
 /inference="ab initio prediction:Prodigal:2.6"  
 /inference="similar to AA sequence:RefSeq:CAL35023.1"

```

/codon_start=1
/transl_table=11
/product="putative glutamine transport ATP-binding
protein"
/protein_id="Prokka:DMACINML_01389"
/translation="MIEIRNLSKKYGNLEVIKNISTKISKGDIISIIGPSGGGKSTFL
RCINRLELADSGEILINGCNILNEQIDINKIRQKVSVMVFQHFNLFANKNVLQNLCLAP
VKTGILNEDEAIKKAIEILLKKVGLSDKKEVMPHKLSSGGQKQRIAIARSLMMNPDVILF
DEPTSALDPEMIGEVL SIMKDLAAEGLTMIVVTHEMGMFARNVANRIFFMDKGELAVDA
SPKEVFENPKNERLKEFLNKVLNH"
gene complement(45353..46837)
/locus_tag="DMACINML_01390"
CDS complement(45353..46837)
/locus_tag="DMACINML_01390"
/inference="ab initio prediction:Prodigal:2.6"
/inference="similar to AA sequence:RefSeq:CAL35024.1"
/codon_start=1
/transl_table=11
/product="putative amino-acid transport protein"
/protein_id="Prokka:DMACINML_01390"
/translation="MGEQNLTLNPSIPFDEKILKFLEYVLPYDTTIMVLLIICGIYY
SFLTRFVQFRMLKSVFKILTERNENHTKEHISPFQALMISTASRVGIGNIAGISIAIA
AGGAGALFWMWLMFAFFGGASAF AESTLAQIYKSKDNTGGFKGGPAYYIKKALASHFFG
AFFAFILIIITYAYGFNGLQSQMTSAFKVYYDMFNPNATADFASSSWPMIIGIILTLF
GIWMFFSHHTKIGKVSSLIVPFMALAYILLALIAVLINLDKIPSVVSLIFESAFDFKA
IFGGFAGSALVIGIKRGLFSNEAGMGSAPNAAAAALTSHPAKQGIIQAFSVLIDVIVC
TSSGFLVLFMAYFNVGADGKPLLAMPLIQEAMREYYGSFGVHFITIAIVLFAITSL
IGNYYAQANVKYLTNSKLLMNLFRITAVAMIFIGSQMNLKLAWSLADLTMAFMAITN
IISLLLLGGIVNKVLKDFNDQQNSKINPKFSASKLGIKNAECWD"
gene complement(46942..47409)
/locus_tag="DMACINML_01391"
CDS complement(46942..47409)
/locus_tag="DMACINML_01391"
/inference="ab initio prediction:Prodigal:2.6"
/inference="similar to AA sequence:RefSeq:CAL35025.1"
/codon_start=1
/transl_table=11
/product="putative RNA methylase"
/protein_id="Prokka:DMACINML_01391"
/translation="MFNIVLVHPRIPQNTGSIGRMCFNAGFKLHIIKPIVFDISQKAV
RRAGLDYWEKLEPVIWESLDIFLEHNLIIYKDRFFFATTKSNKFYFQAKFQENDFLFFG
SESYGLPMELMQLNWDNAITIPMKACGRSLNLATSVGIVSYEALRQNFDFHRL"
gene complement(47413..48402)
/locus_tag="DMACINML_01392"
/locus_tag="DMACINML_01392"
/EC_number="5.1.1.1"
CDS complement(47413..48402)
/locus_tag="DMACINML_01392"
/EC_number="5.1.1.1"
/inference="ab initio prediction:Prodigal:2.6"
/inference="similar to AA sequence:RefSeq:CAL35026.1"
/codon_start=1
/transl_table=11
/product="alanine racemase"

```

```

/protein_id="Prokka:DMACINML_01392"
/translation="MSLIKINQKAYESNLKTIAGKIGSFSRLICVFKDNAYGHGAKIL
APLAKTLGVNFIIVKNEKEAYELEDFFDNILILSHHPHGKENPKFIYALNDISKINAY
QNNTRIHVKIDTGMHRNGICVEDLNDALLKMKHSTLKLEGIFTHFAGAEMDASFFVQ
KEKFSKAKDIAKQIYKNLIFHSHNSAALFRAMKIPEDFCRTGLAQFGYDESLEVL
SLYAHRLSCRELQIGQSVGYGGAFSATEKIKIATYDLGYADGLFRYNGKGDLLANKQ
KILGKISMDSFSCQDFGEEVCFVDNANIWADFFKTINYEILVKLHPDIPRVLV"
gene complement(48402..49379)
CDS /locus_tag="DMACINML_01393"
complement(48402..49379)
/locus_tag="DMACINML_01393"
/inference="ab initio prediction:Prodigal:2.6"
/inference="similar to AA sequence:RefSeq:CAL35027.1"
/codon_start=1
/transl_table=11
/product="putative periplasmic protein"
/protein_id="Prokka:DMACINML_01393"
/translation="MLKKILAFYFICVSALGASDLVKIYLNQGLDAVGAAIEKELTNK
EFWLDEIGDKNISLGYDDKVSIVLTKTKDKILRVSYNNGEIKQDFEQKAIITGLMG
DKEVEGDLKTPVGFYELGRKFNPDPYYPFAFATTYPNLLDKVQKGTGGGIWIHGYP
LDGTRLDEFKTRGCIALFNENLEEFKVVQDKKVFAMTEEKEKVRAKKEDIAALLADL
FAWKLAWTSDINTYLNFYDEKQFKRFDKMKFEQFASMKKSIFSRKEDKKIKFSDINI
SPYPNVENETMYRISFYEDYYTKNYQFKGDKILYVKIDSKGKMKILAEQ"
gene 49542..50015
CDS /locus_tag="DMACINML_01394"
49542..50015
/locus_tag="DMACINML_01394"
/inference="ab initio prediction:Prodigal:2.6"
/inference="similar to AA sequence:RefSeq:AON67086.1"
/codon_start=1
/transl_table=11
/product="putative periplasmic protein"
/protein_id="Prokka:DMACINML_01394"
/translation="MKNFFIVVMFLIIFSSIFYILYDKKKDNIFKLNCLPLKCDLNS
QDCTFSFNGKQILVSAYPKPIKIFKNTAIKVSNFPNPNLKIKIYSLNSYIGNIIPQF
TNTKDAIINFTGKSVTDDSRFRVEFLNNDKPTGFFDFDVTQLQKIYNSAILPQN"
gene 50108..50524
CDS /locus_tag="DMACINML_01395"
50108..50524
/locus_tag="DMACINML_01395"
/inference="ab initio prediction:Prodigal:2.6"
/inference="similar to AA sequence:RefSeq:CAL35029.1"
/codon_start=1
/transl_table=11
/product="putative periplasmic protein"
/protein_id="Prokka:DMACINML_01395"
/translation="MKKIITLGALFALS LCAKDIEIKDAFIKQTPPNAVNSAIFLTIV
NNTDKDISLIDAKTDINQVSELHTHAHKHGMKAMIQIPEIPVKAHSSTELKPGGYHIM
LFKLNQPVDKNTKANLTLIFDNNQSLEVRDIGSKEL"
gene 50528..50980
CDS /locus_tag="DMACINML_01396"
50528..50980
/locus_tag="DMACINML_01396"
/inference="ab initio prediction:Prodigal:2.6"

```

```

/inference="similar to AA sequence:RefSeq:CAL35030.1"
/codon_start=1
/transl_table=11
/product="putative periplasmic protein"
/protein_id="Prokka:DMACINML_01396"
/translation="MKKVFFILASGLSLLILYIIFDFYVLKDR TTLNQD DDL SPLSCD
LNIENCTYNFKNREVLVSM DPKPLQSLEITNLKIKNLGNYKNLKIKIYGLNMFMDIM
PKV NKINETDYESKLVLAACVLEVMRFRAEVFEDDKPIGFHFDLKR"
gene 50977..51531
/locus_tag="DMACINML_01397"
CDS 50977..51531
/locus_tag="DMACINML_01397"
/inference="ab initio prediction:Prodigal:2.6"
/inference="similar to AA sequence:RefSeq:CAL35031.1"
/codon_start=1
/transl_table=11
/product="putative periplasmic protein"
/protein_id="Prokka:DMACINML_01397"
/translation="MKKVFLFVIALVAIGILAFYFANKNQYDFNLRS AFKEQT TLEDF
KGK KLIVYFGYTF CPD ICPSTLSLIGKNLSSLKDPRAHVLFISLDISR DGNVTSTNEW
LRYFYPNADALIAKNDSVLKVKVAKNYGVQYQKIDINDSV MKYSVAHSSEIFLIDENGL
LQKIIRDLNPEEVAKELKNFLSSK"
gene complement(51537..52436)
/locus_tag="DMACINML_01398"
CDS complement(51537..52436)
/locus_tag="DMACINML_01398"
/EC_number="2.5.1.47"
/inference="ab initio prediction:Prodigal:2.6"
/inference="similar to AA sequence:RefSeq:CAL35032.1"
/codon_start=1
/transl_table=11
/product="cysteine synthase"
/protein_id="Prokka:DMACINML_01398"
/translation="MRVYKKVNELIGNTP IIQLEKFGANLFAKCEFLNPSHSIKDRAA
FAMIQSALDEGKIDS KTVIVEATSGNTGIALAMICADLGLQFVATMPESMSIERRKMM
TLFGAKLELTPASLGMKGAVDKANEILKNT PNSFMPSQFENLANKNHRKTTALEILK
DLNDLDIFVAGFGTGGTISGVGEVLKEKLEKIHIAAVEPLASPLLSKGEAGSHKIQG
IGANFIPAILNKDVIDE IITVSNEDAINTAKELAKNGLMVGISSGANVFAASVLAKKF
PDKKILTVLNDTAERYLSTDLFA"
gene complement(52563..52853)
/locus_tag="DMACINML_01399"
CDS complement(52563..52853)
/locus_tag="DMACINML_01399"
/inference="ab initio prediction:Prodigal:2.6"
/inference="similar to AA sequence:RefSeq:CAL35033.1"
/codon_start=1
/transl_table=11
/product="DNA-binding protein HU"
/protein_id="Prokka:DMACINML_01399"
/translation="MTKADFISQVAQTAGLTKKDATAATDAVISTITDVLAKGDSVSF

```

gene IGFGTFTAERAAREARVPSTGKTIKVPATRVAKFKVGNLKDAAKAKKKK"  
 complement(52931..54772)  
 /gene="ciaB"  
 /locus\_tag="DMACINML\_01400"  
 CDS complement(52931..54772)  
 /gene="ciaB"  
 /locus\_tag="DMACINML\_01400"  
 /inference="ab initio prediction:Prodigal:2.6"  
 /inference="similar to AA sequence:RefSeq:SQE24292.1"  
 /codon\_start=1  
 /transl\_table=11  
 /product="CiaB protein"  
 /protein\_id="Prokka:DMACINML\_01400"  
 /translation="MNNFKELAKLVRNRKENINLFYNLLDSEQWDEYFERLLLALSELK  
 RDKTTLLAILRRLVLDLKEENLIQEWKKNFKEEKITELKHKFYEEIRKFYEKEHQELI  
 NELKERKIVNDFYQNLIQGVHNIGLVINAFEVSWTKEIIEKNNKILATQFPNLDDAME  
 FLRKNQLYQTTPKGDICERSYGLVLRIGNIWKFPYARFFENEILKLEFAFDDMIHKL  
 KQIAKNEDELAYIEYFQKLKLAFCCKEKKVIGAWQEAFAWMKVKSPQLQVGHPLLEY  
 EDSYTHAVALEWDIRIEDESDFDTLKFSEIKQSFMRVYENIGIQDEQLKSEVLHNID  
 KTQLYICAPMIYYGAELKGLFSAQVVPNDESSSIAGKKIFAFNLFVYENAKTKPFMR  
 IASEIFDKDFLNYGRDILFFKEKVKRVYEVSTIGHEFGHIFFTAKDSEKLMNQSGFF  
 KNIEEYKATSGGLVNFYHEQEDLKLVPVHELKRAVSLIAQRVEEVKPPYYTEGLIH  
 LSLLFQSGVLRFENDKLNVNFLDYEEKFKDATLKNYHDLAKHYALKLDAKEFLNRFC  
 ILENDIFMPLHPECKEFVQFYSLYEKIGNEIDNSGEFERYKMQKKS"  
 gene 54836..55249  
 /locus\_tag="DMACINML\_01401"  
 CDS 54836..55249  
 /locus\_tag="DMACINML\_01401"  
 /inference="ab initio prediction:Prodigal:2.6"  
 /inference="similar to AA sequence:RefSeq:CAL35035.1"  
 /codon\_start=1  
 /transl\_table=11  
 /product="putative hydrolase"  
 /protein\_id="Prokka:DMACINML\_01401"  
 /translation="MRNMGEPKLVAMPSTNPAGNIFGGWILSQIDLGAIAAREL  
 SPERVVTISMDKVVFKEPVFIGDIISCYSKIVSVGKTSIGVEVEVTAQRVDSQGCTSC  
 INVTSALVTYVSVTREGKKKPISEELKKIHGFVNT"  
 gene complement(55471..57582)  
 /gene="cstA"  
 /locus\_tag="DMACINML\_01402"  
 CDS complement(55471..57582)  
 /gene="cstA"  
 /locus\_tag="DMACINML\_01402"  
 /inference="ab initio prediction:Prodigal:2.6"  
 /inference="similar to AA sequence:RefSeq:CAL35037.1"  
 /codon\_start=1  
 /transl\_table=11  
 /product="putative integral membrane protein (CstA)"  
 /protein\_id="Prokka:DMACINML\_01402"  
 /translation="MARFGTKILWLFVAVLGAICFAHLALQNGESVSAIYLVAAVCI  
 YMIGYRFYGRFVAYKVLKLDKNRATPAVLENDGRDFVPTNRTVLFGHFFAAIAGAGPL  
 VGPIILAAQMGYLPSMLWILVGGVLAGAVHDFVVLFISTRRRGRSLGEIIKDEMGSFTG  
 GVAMVAIFGIMLIIIAILAMVVVKALAESPWGLFTIAMTIPIAIFMGVYMRFIIRPGRV  
 GEASVIGFVLLILAIHYGSVIAADPYWAKIFTLEAPT LAIIMMAYGFIAAVLPVWFL

```

APRDYLSTFLKIGVIVMAVAIIIVAPDLQMPKTNTQYFDGTGPVFAGAIFFPFLFITI
ACGAISGFHALISSGTPKMLENETHALPVGYSMLAESAVAVMALICACILHPGLYF
AINSSSALIGSDVVSAAQAISWGSITPEEISTLTTNIGEYITLSRTGGAPTFAIGV
ALILHELFGGIDLMAFWYHFAILFEALFILTAVDAGTRACRFMVQDILGNVYKPLGNI
HNPAGLLATALSVAGWGYFLYQGAIDPKGGIYTLWPLFGVSNQMLAGMALLLATTIL
VKMGKAKYTWVTLVPATFVLVATLYGGIYQKIMPYEEGKVGNAVSHVAAVTIQSQKIQ
DLELKLNNVKDENEIAAIEKEISIAIQSKIGNLINAILCVFFMLATLLVILSCIGICL
GKIKIPLKETKYIKLNEFQKV"
gene      complement(57955..58884)
          /gene="prsA"
          /locus_tag="DMACINML_01403"
CDS      complement(57955..58884)
          /gene="prsA"
          /locus_tag="DMACINML_01403"
          /EC_number="2.7.6.1"
          /inference="ab initio prediction:Prodigal:2.6"
          /inference="similar to AA sequence:RefSeq:CAL35038.1"
          /codon_start=1
          /transl_table=11
          /product="ribose-phosphate pyrophosphokinase"
          /protein_id="Prokka:DMACINML_01403"
          /translation="MRGYKIFSGSANVEFAKQISKYLSLPLSDAGVKRFSDFGEISVQI
DESVRGKDVFIQSTCVPTNDNLMELLILTDALRRSSANSITAIIPYFGYARQDRKAN
PRVPITAKLVANLIEAAGIDRVATIDLHAGQIQGFFDIPVDNLYGSIVFNDYIKTKHF
KNAIVGSPDIGGVARARSVAKNLGLDIVIVDKRREKANESEVMNIIIGDVKDKVEVILVD
DIIDTAGTIVKAAEALKNKGAKSVMACCTHAVLSGKAYERIASGALDELVVTDTIPLR
EQLPNIKVLSVAPVFAEVIRRVYHNESVNSLFI"
gene      complement(58984..59643)
          /locus_tag="DMACINML_01404"
CDS      complement(58984..59643)
          /locus_tag="DMACINML_01404"
          /inference="ab initio prediction:Prodigal:2.6"
          /inference="similar to AA sequence:RefSeq:ADN91087.1"
          /codon_start=1
          /transl_table=11
          /product="Amino acid ABC transporter, permease protein
PEB1"
          /protein_id="Prokka:DMACINML_01404"
          /translation="MENVFNAQNIIEFLMQGLALTLKIALATCIISIVFGTFLAITKNY
GDRFSRFLATCYIDIFRNTPLLLWMLAACFVLPSPFPQMPQAFWGTIGFSLYTSSVMA
EIIIRGGLNSIPKGQFEAAYSQGFKFFTLFYIILPQTFRKVVPSLLSQIVTTVKDTAY
LAGLQIAELTYNSKNILARLTSFDEILATIGFVALIYFAICFSLSMLVRYYAKKTAYV
S"
gene      complement(59654..60406)
          /locus_tag="DMACINML_01405"
CDS      complement(59654..60406)
          /locus_tag="DMACINML_01405"
          /inference="ab initio prediction:Prodigal:2.6"
          /inference="similar to AA sequence:RefSeq:CAL35040.1"
          /codon_start=1
          /transl_table=11
          /product="putative ABC-type amino-acid transporter
permease protein"
          /protein_id="Prokka:DMACINML_01405"

```

```

/translation="MNESVGFVDKLRQLLSSWGLYDESSTNPF AIWK FVDALDNGDAF
ISGFIYTLVSVILALLIAIVFGTIGGVMATSKIKILRAYTRVYVELFQNIPLVIQIFF
LYFALPGLGIHLDI FTIGVLGIGAYHGAYVSEVVRSGILSVPRGQFEASSSQGFTYIQ
QMRYYIIVPQTIKIILPPMTNQMVNLIKNTSVLLIIGGAELMHSADSYAADYGNYPAY
IFAAILYFIICYPLAYFAKVYEDK LKKAHLTR"
gene      complement(60408..61187)
          /gene="peb1A"
          /locus_tag="DMACINML_01406"
CDS      complement(60408..61187)
          /gene="peb1A"
          /locus_tag="DMACINML_01406"
          /inference="ab initio prediction:Prodigal:2.6"
          /inference="similar to AA sequence:RefSeq:CAL35041.1"
          /codon_start=1
          /transl_table=11
          /product="aspartate/glutamate-binding ABC transporter
protein"
          /protein_id="Prokka:DMACINML_01406"
          /translation="MVFRLSLKLAALALGACMAFTSANAAEGKLEAIKAKGELVGV
KNDVPHYALLDQATGEIKGFEVDVAKMLAKSILGDEKKIKLVAVNAKTRGPLLDNGSV
DAVIATFTITPERKRVYNFSEPYQDAVGLLVLKEKNYKSLADMNGATIGVAQAATTK
KVINTAAKKIGVKV KFSEFPDYSIKAALDAKRIDAFSVDKSILLGYKDENNEILPDS
FDPQSYGIVTKDDVNF SNYIDEFVKQNKTEIDALAKKWGL"
sig_peptide complement(61107..61187)
          /gene="peb1A"
          /locus_tag="DMACINML_01406"
          /inference="ab initio prediction:SignalP:4.1"
          /note="predicted cleavage at residue 27"
gene      complement(61213..61941)
          /gene="pebC"
          /locus_tag="DMACINML_01407"
CDS      complement(61213..61941)
          /gene="pebC"
          /locus_tag="DMACINML_01407"
          /inference="ab initio prediction:Prodigal:2.6"
          /inference="similar to AA sequence:RefSeq:CAL35042.1"
          /codon_start=1
          /transl_table=11
          /product="ABC-type amino-acid transporter ATP-binding
protein"
          /protein_id="Prokka:DMACINML_01407"
          /translation="MIELRNVNKYYGTHHVLKNINLCVKEGEKLVIIIGPSGSGKSTTI
RCMNGLEEVSSGEVVVNNLVLNHKNKIEICRKYCAMVFQHFNLPHMTVLQNLTLAPM
KLQKSRQEAETAYQYLKVVGLVDKANVYPATLSGGQQQRVAIARALCTKKPYILFD
EPTSALDPETIQEVLDMKEISTQRNTTMVVVTHEMGFAKEVADRIIFMEDGAIVEEN
VPSEFFSNPKTERARLFLGKILKN"
gene      complement(62104..62892)
          /locus_tag="DMACINML_01408"
CDS      complement(62104..62892)
          /locus_tag="DMACINML_01408"
          /inference="ab initio prediction:Prodigal:2.6"
          /inference="similar to AA sequence:RefSeq:ASI87437.1"
          /codon_start=1
          /transl_table=11

```

```

/product="Chemotaxis protein methyltransferase CheR"
/protein_id="Prokka:DMACINML_01408"
/translation="MEEKINPSELELNEFIKIVNEISGIDLNEKRNILALKLSKFVSN
AGVKTFAEFLSKLRINRQLRQDTLDFVTIGETYFLRELSQLKEIIYYAKSLEKTVNII
SAPCSSGEEVYSMAILGAQNFLKDMMLGIDINSSVIEKAKAGKYQGRTLQRLSESEK
RRFFTDIGDQTFSSINKSELCTCRFELCNVFEKFLRLGKFDIIASRNMMIYFDYDSKI
KLMERFYQILADNGRLYVGNADLIPETAFFKKIFSPRGVYYEKI"
gene complement(62905..63459)
/gene="cheB"
/locus_tag="DMACINML_01409"
CDS complement(62905..63459)
/gene="cheB"
/locus_tag="DMACINML_01409"
/EC_number="3.1.1.61"
/inference="ab initio prediction:Prodigal:2.6"
/inference="similar to AA sequence:RefSeq:CAL35044.1"
/codon_start=1
/transl_table=11
/product="putative MCP protein-glutamate methylesterase"
/protein_id="Prokka:DMACINML_01409"
/translation="MKLLLIGSSTGGPNQLKFLLDVDIKNTCVVIAQHMSASFIPSF
VNQFNKEALSEVSLNDKEVLTKIYICQKNTILSGNLNLMANWKEVATSFKPNVDLL
FHSAVPLIKTNKILAVILTGMGDDGAKGLFELYKVGKCLCENEADSIVYGMPPKRAKD
INPKLRPMSLKEIKQEILNFINEE"
gene 63629..64066
/gene="rpiB"
/locus_tag="DMACINML_01410"
CDS 63629..64066
/gene="rpiB"
/locus_tag="DMACINML_01410"
/EC_number="5.3.1.6"
/inference="ab initio prediction:Prodigal:2.6"
/inference="similar to AA sequence:RefSeq:CAL35045.1"
/codon_start=1
/transl_table=11
/product="ribose 5-phosphate isomerase"
/protein_id="Prokka:DMACINML_01410"
/translation="MLREKIYIASDHAGFMLKEKICAFLEKQIPFDDLGTNNPTSCD
YPDYAHLLASKIDEQSFILICGSGIGISIAANRHKNIRCALCNESLSAKLARKHNDA
NVLAFFGRLVGIDAAIDMIENFIQTPFDQGRHVKRIQKIEVDC"
gene 64066..64398
/locus_tag="DMACINML_01411"
CDS 64066..64398
/locus_tag="DMACINML_01411"
/inference="ab initio prediction:Prodigal:2.6"
/inference="similar to AA sequence:RefSeq:CAL35046.1"
/codon_start=1
/transl_table=11
/product="putative membrane protein"
/protein_id="Prokka:DMACINML_01411"
/translation="MFANWLIFTALICATIYLVVMLFYYKTLNKEKTSKDFIKNNLD
DTEIVIRKIQIQRLQNSLGNIDILTEELNKIKADLTSLRTRNSQYRLENDKLRRIKEL
EAKIEALL"
gene 64395..64943

```



CDS /gene="apt"  
 /locus\_tag="DMACINML\_01412"  
 64395..64943  
 /gene="apt"  
 /locus\_tag="DMACINML\_01412"  
 /EC\_number="2.4.2.7"  
 /inference="ab initio prediction:Prodigal:2.6"  
 /inference="similar to AA sequence:RefSeq:CAL35047.1"  
 /codon\_start=1  
 /transl\_table=11  
 /product="adenine phosphoribosyltransferase"  
 /protein\_id="Prokka:DMACINML\_01412"  
 /translation="MTKLTQNEQQFLSESIRVIPNFPKEGIIFRDITLLNNQKALSF  
 LLDHLSKRYQSMNLDIAGTESRGFIFAAMICAKLNLFPVPIRKPNKLPSENTYSCEYE  
 LEYGTDRVEIHQDAFRNIKNAKILLVDDLIATGGTALASFELIKKAGGECIEACFLMN  
 LKNLGGEEKLQKHCSVYSVLEF"

gene 64953..65648  
 /locus\_tag="DMACINML\_01413"

CDS 64953..65648  
 /locus\_tag="DMACINML\_01413"  
 /inference="ab initio prediction:Prodigal:2.6"  
 /inference="similar to AA sequence:RefSeq:A0H51883.1"  
 /codon\_start=1  
 /transl\_table=11  
 /product="putative membrane protein, DedA family, type I  
 (SNARE domain)"  
 /protein\_id="Prokka:DMACINML\_01413"  
 /translation="MRKWFKFFIFIVLIALIIYVIHGLVKNDFSLEEFIIIRIWNHVE  
 TWGYLILFCWSILEGELGLIFAGLAAHDGKMHVLAIFIAGLGGFVGDQIYFYIGRYN  
 KRYIQKRLRSQRRKFAVAHLLLQRFGWPIIFIQRYMYGFRTVIPMSIGITRYSAKKFA  
 IINLLSAVWAAITILLAWHFGNLIQNFLTWAKNHWYLAAIMIICFLSLLVFTFKQIE  
 KAILKEKRKKNDI"

gene 65638..67089  
 /locus\_tag="DMACINML\_01414"

CDS 65638..67089  
 /locus\_tag="DMACINML\_01414"  
 /EC\_number="3.4.11.1"  
 /inference="ab initio prediction:Prodigal:2.6"  
 /inference="similar to AA sequence:RefSeq:CAL35049.1"  
 /codon\_start=1  
 /transl\_table=11  
 /product="aminopeptidase"  
 /protein\_id="Prokka:DMACINML\_01414"  
 /translation="MIFELSDKKIHSIKADFELVFIQDKNLKPFANEKDFFKLSNYTG  
 EGNLLDLNNKRLFIELKSLNYEDIRLALYTAYKNLEKLNKSVKLPKPSILGDCVVRSA  
 SLVEGVLFGAYKFDKYQSEKKESTLKKFIISAEELNAKKFNLDEAKIGLLRGEILANA  
 TNFTKDIVNEIPEIYTPLKMNVEDAQNLTKENKNITCKIYDEKFLAKEKMNFLAVNRA  
 SAHPPRLIHLSYKAKNAKRVVFGKGLTYDSGGLSLKPADYMLTMKADKSGAAAAMG  
 IIKAVAELELEVHCILGATENMIGGNAYKPDDVLISREGVSIIEVRNTDAEGRVLVA  
 DCLSYAQDLKPDLLIDMATLTGACVVGLGEFTSGIMGNNEELQNEFYLSKKSGEYAT  
 ILHFNPYLKEIKSNIADVSNTASSRYGGAITAGLFLDKFIRKEYKDKWLHLDIAGPA  
 YTEKSWGYNISFGAGGAGVRMCVNFLLIHLRKNK"

gene 67086..68189  
 /locus\_tag="DMACINML\_01415"

CDS 67086..68189  
 /locus\_tag="DMACINML\_01415"  
 /inference="ab initio prediction:Prodigal:2.6"  
 /inference="similar to AA sequence:RefSeq:CAL35050.1"  
 /codon\_start=1  
 /transl\_table=11  
 /product="putative GTP-binding protein"  
 /protein\_id="Prokka:DMACINML\_01415"  
 /translation="MSLSVGIVGLPNVGKSTTFNALTKAQNAQSANYPFCTIEPNKAM  
 VEVPDLRLNELAKIVKPERIMHSLIEFVDIAGLVKGGASKGEGLNKFLSNIRETEVIL  
 HIVRCFDEENITHVEGGVDPLRDVEIINTELILADIEQLGKKIEKLNKEARANTKGAK  
 ESLEIANSLLLEHLNKGLPASTYSQKEDEIFQALNKELRLLSAKEVIYGANVDENGIGE  
 DNEYVKILKDYANKNNHEVIKLCAKIEEELVGLSDEESAFLSSLGVNESGLDQIIRT  
 AFSKLGKGLISYFTAGVLEVRSWTIKKGWKAPKAASVIHNDFEKGFKAKEVISYEDFIAY  
 KGENGAKKAGKLRLEGKDYIVLDGDMHFRFNV"

gene complement(68195..69580)  
 /gene="argH"

CDS complement(68195..69580)  
 /gene="argH"  
 /locus\_tag="DMACINML\_01416"  
 /EC\_number="4.3.2.1"  
 /inference="ab initio prediction:Prodigal:2.6"  
 /inference="similar to AA sequence:RefSeq:CAL35051.1"  
 /codon\_start=1  
 /transl\_table=11  
 /product="argininosuccinate lyase"  
 /protein\_id="Prokka:DMACINML\_01416"  
 /translation="MKNEMWSGRFSEASNELLKEFNASLNIDRTLYMEDIQGSIAHAT  
 MLENGILKKDELEAIVKGLEQVRIEIEQNRVFNIEDEDIHMAIEKRLSELIGSEIG  
 GRLHTARSRNDQVATDFKLFKKSHLELIMLLKNLIHTLLAHARMHKKTIMPSFTHLQ  
 HAQPISFSFYILSYAFMFRDIKRLQNSLELADFSPLGSCACAGTSYATNRNLSAQIL  
 GFKDIMPNAMDGVSDRDFALDLLYDIAVIFHTSRLCEEMILFSASEFGFLTISDSFS  
 TGSSIMPQKKNPDVCELIRGKTGRVYGNLISLLTIMKALPLAYNKDMQEDKEGLFDSV  
 KTAKDSLIIILNAMLKEVKINEENMLKSCCKGHLATDLADYLVREKNIPFRKAHFIVG  
 NVVAQAEKQGIDISDIEDLSKIDPIFDDKAMKLLDFENSLNSKQSEGSSSVASVEKQI  
 QILERFLESLG"

gene complement(69590..71164)  
 /gene="pckA"

CDS complement(69590..71164)  
 /gene="pckA"  
 /locus\_tag="DMACINML\_01417"  
 /EC\_number="4.1.1.49"  
 /inference="ab initio prediction:Prodigal:2.6"  
 /inference="similar to AA sequence:RefSeq:CAL35052.1"  
 /codon\_start=1  
 /transl\_table=11  
 /product="phosphoenolpyruvate carboxykinase (ATP)"  
 /protein\_id="Prokka:DMACINML\_01417"  
 /translation="MKKFENLGLENIKKVYHNLSFDELYEHEKKNEEGQCTDNGTFAV  
 DTGIFTGRSPKDKYFVKQDPSSKYIAWGKVNQAITKELFDELLMKARKELSNKEIYVQ  
 DVFCGASLKSRAIRFVTEIAWQAHFVKNMFIRPNDKELDEFKADFIVYNACKCVNKD  
 YEKGNLNSEVFVIFNIEENIAVIGGTWYGGEMKKGIFSMNMYWLPENKLSMHCSANV"

GEKGDVALFFGLSGTGKTTLSTDPKRRLLIGDDEHGWDDEGVFNFEggCYAKTINLDPE  
 SEPEIYGAIKRNALLENVLRSDKSVDYSDASKTENTRVSYPiEHIENHEPSLKAGHP  
 KNIIFLSADAFGILPPVSKLSKEQAMYYFLSGYTAKVAGTERGITePQATFSACFGEP  
 FMPLHPTVYARLLGEKIDKHEVNVYLVNTGWSGGSYGVGKRMSIKATRACINAILDGS  
 ITQCFEFNFDFVNLAI PKLTGVESLLNPINTWQDKDEFIATRNLAKMFSDNFKRY  
 EDVKEGVEYSQFGPKI"

gene complement(71177..72967)  
 /gene="pycB"  
 /locus\_tag="DMACINML\_01418"

CDS complement(71177..72967)  
 /gene="pycB"  
 /locus\_tag="DMACINML\_01418"  
 /EC\_number="6.4.1.1"  
 /inference="ab initio prediction:Prodigal:2.6"  
 /inference="similar to AA sequence:RefSeq:CAL35053.1"  
 /codon\_start=1  
 /transl\_table=11  
 /product="putative pyruvate carboxylase B subunit"  
 /protein\_id="Prokka:DMACINML\_01418"  
 /translation="MAKKFIDVMDTSFRDGFQSVYGARVLMQDFFPAVEAAKEAGITH  
 FEFGGGARFQSLYFYL NEDAFEMMDKFRSIVGKDANLQTLARGVNTVTLDTGSRELID  
 LHAKLFAKHGTTTIRNFDALNDVNNLKFSGECIKKYGLKHEITITLMDLPPNCQGAHD  
 VFFYERILKEILAAEIPFDSICFKDASGTSNPNKIYETIKMARKNLPQDVHIRLHTHE  
 TAGVSIACYLAAL EAGVDGIDLAAAPVSGGTSQPDILTMMHALKKGKDYDLGGLEEEKI  
 LKYEAVLRDSLREYFLPPEATMV SPLIPFSPMPGGALTANTQMMRDNNILDKFPEVIH  
 AMREVVKEGGFGTSVTPV SQFYFQAFNNVMFGPW EKIAEGYGMVLGYFGKTPVEPD  
 AEVKKLAAKQLNLEPTTELAIDIADKDETKSIAYVKS LLEKEGI AVSEENIFIAAACK  
 EKGIAYLKGEAKVNRKNAPVSKSNSIGVDENKFTVSVNGNKYHVEVSAGFDKDVNIK  
 SVRKADTQEDITQDVSSEGIQAGISGNVFKIYIN EGEEVKSGQVVMVLEAMKMEIEV  
 SAPKDGII EKICVKTGDSVSENNLVAIYKK"

gene complement(72990..74339)  
 /locus\_tag="DMACINML\_01419"

CDS complement(72990..74339)  
 /locus\_tag="DMACINML\_01419"  
 /inference="ab initio prediction:Prodigal:2.6"  
 /inference="similar to AA sequence:RefSeq:CAL35054.1"  
 /codon\_start=1  
 /transl\_table=11  
 /product="putative sodium:amino-acid symporter family  
 protein"  
 /protein\_id="Prokka:DMACINML\_01419"  
 /translation="MRTYFSKIGFILAVAGGAVGLGNAWKFP TLSAENGGFVFLLYL  
 FFTLSIGFSIFLAEVSMGR LRSDDL ANAYYTLAKNHAKKWR YGGIFTLGGIFVLSFY L  
 VIMGWVLKYAL TSLYLPKNLEQAGNDFSTLISVDLSNSILFFSLSFFLTLLIVSKGL  
 IKGIERLNVLIMPSL FIMLVFMLFYCMSFQSGFKQAF SYLFYPDFSNFKLSSIAEALG  
 LAFFTLC LGIGCIVT YSAALS KSKINFIKSSIFIVL INLLISFIMGLIVFTFIF EFGAN  
 PNVQPGIVFVSLMSLFN ELGILGYVLAFCFFLALFFAGITS AVSMIEPLTFYV VNNY  
 KISR I KALLFIGFIVFVLGIC CILSLNIHFSSLFNFFGKDFFTLLDKVTSNILLPLGA  
 IVSSIFVGGFVDKKRIYKIFSKFVNRQIFTIWLFFIRFISPIAII CIMCYQIFVKIS"

gene complement(74353..75687)  
 /locus\_tag="DMACINML\_01420"

CDS complement(74353..75687)  
 /locus\_tag="DMACINML\_01420"  
 /inference="ab initio prediction:Prodigal:2.6"

```

/inference="similar to AA sequence:RefSeq:CAL35055.1"
/codon_start=1
/transl_table=11
/product="putative sodium:amino-acid symporter family
protein"
/protein_id="Prokka:DMACINML_01420"
/translation="MNSKFSKIGFILAVAGSAVGLGNAWKFPPTLVGQSGGSFILLYI
ILTLGVGFVIFLAELSIGKISEKDPVNAYEKLAPSNKKAWSYAGFTMIGAILIVSFYT
LVIGWILKYAYLSISGNLYPDLDTSSAEFGKLISDFLSQFICFTLIFLIVFYTVSKG
VKNGIEKLNVMMPALFILLVLM LIYAMTKDGFMMAVEFLFVPDFSKISTSNVLEALG
LAFFSLSLGVGTIITYSASLPERTNFITSTLNIIFINLLIGLLMGLVVFTFIFEFGFD
ASKEGPGLIFVSLATLFQKLGLIGHILGAAFFISLIFAGITSAVSMIEPFAFYLINSF
GMSRKKALILIGIIVYTLGILCILSSLDSTAFKIFGLSVFDLLDTLSSKIIMPLGGIL
AAVFGFVIKKEALQILFGPYMKGIFFELWYIFLRFVSP LAVIVVMISAFK"
gene 75932..76270
/gene="atpE"
CDS /locus_tag="DMACINML_01421"
75932..76270
/gene="atpE"
/locus_tag="DMACINML_01421"
/EC_number="3.6.3.14"
/inference="ab initio prediction:Prodigal:2.6"
/inference="similar to AA sequence:RefSeq:CAL35056.1"
/codon_start=1
/transl_table=11
/product="ATP synthase F0 sector C subunit"
/protein_id="Prokka:DMACINML_01421"
/translation="MKKILFLFLAATAFAAEANAPVEQEAINVWIKAFSVLAAGLG
LGVAALGGAIGMGNTAAATIAGTARNPGLGPKLMTTFIALAMIEAQVIYALVIALIA
LYANPFIVFA"
sig_peptide 75932..75985
/gene="atpE"
/locus_tag="DMACINML_01421"
/inference="ab initio prediction:SignalP:4.1"
/note="predicted cleavage at residue 18"
gene 76319..76404
/locus_tag="DMACINML_01422"
tRNA 76319..76404
/locus_tag="DMACINML_01422"
/product="tRNA-Leu"
/inference="COORDINATES: profile:Aragorn:1.2"
/note="tRNA-Leu(gag)"
gene 76655..78418
/locus_tag="DMACINML_01423"
CDS 76655..78418
/locus_tag="DMACINML_01423"
/inference="ab initio prediction:Prodigal:2.6"
/inference="similar to AA sequence:RefSeq:ADT73068.1"
/note="conserved hypothetical protein"
/codon_start=1
/transl_table=11
/product="hypothetical protein"
/protein_id="Prokka:DMACINML_01423"
/translation="MNKIDNIANFLNKKSKKCLAINGSWGIGKTYLWKQVEKKLSEVD

```

KDKKVYIDLFGKESYKQILEEIVFKLYGTYSFTKKASNVASNLIKKASCEFIKIEP  
 DAIFSAKKEDFNIIIVCFDNIERRSDNLSLKEILGLVLLKKEKECNVVMIFHKGEL  
 EEQDNNSTIDNKKKETKQDLNLSLQAYESKAKEEQAKQNNKNWYQIYKEKIIDCEITI  
 RNNDEVAKAIIKEKIDQYTKITDEIRNIIENIIFEIHKEHCNGLRLLFHALEHIDYF  
 NKHCFLFREYDDKQAFIALKLNYQSLIFQTKKYLKSIKIETIDLSSGFYHLYEKYK  
 NMFYLSKKEKEQVRYDFNQTLKTNFYFKLQCKMEHLTGNSDEQFVKVVENSLLEID  
 FYSKGGIIYYPDFYQDLFSTYTQITKKKLSNIEEKINKHYIEALVAEELEFDFRDNY  
 KSDKDLLKLENEKWKRYEDTKEKYITSKYENINAFINSCENIESSFNSEAIKQYIF  
 FKKEELIQLFKENDFCKFFNHFSKNMNIHNFNDLNNLFRAYLDFLDLDENKIK  
 KSIVLKYINSRNSVLRKLLIE"

gene 78837..79712  
 /locus\_tag="DMACINML\_01424"

CDS 78837..79712  
 /locus\_tag="DMACINML\_01424"  
 /inference="ab initio prediction:Prodigal:2.6"  
 /inference="similar to AA sequence:RefSeq:CAL35094.1"  
 /codon\_start=1  
 /transl\_table=11  
 /product="putative methyltransferase"  
 /protein\_id="Prokka:DMACINML\_01424"  
 /translation="MQENPLEKQFLNHPLFSKIQLKKEIENSKLYLEDVILKTNQ  
 AENEILELAKELKWRKGPFKIDDLFIDTEWQSFVKFNILKPFMKEISQKCVADIGCN  
 NGYYMFKMLEFNPKKLIGFDPSIKYRLQFELINALAKTSIKYELLGVEDLPKYELKFD  
 VIFCLGVIYHRSDPVKMLKDLKAGLNKNGTVFLDTMYIEDPREIALVPNKYTSKIPNI  
 YFVPSISALKNWCERAGFKDFEVLATKIDENEQRKTDWIDFSLENFLDPNNKNTI  
 EGYEAPKRYYVIRV"

gene 79789..80364  
 /locus\_tag="DMACINML\_01425"

CDS 79789..80364  
 /locus\_tag="DMACINML\_01425"  
 /inference="ab initio prediction:Prodigal:2.6"  
 /inference="similar to AA sequence:RefSeq:CAL35095.1"  
 /note="hypothetical protein Cj0977"  
 /codon\_start=1  
 /transl\_table=11  
 /product="hypothetical protein"  
 /protein\_id="Prokka:DMACINML\_01425"  
 /translation="MAKKDTFEEYAQLEEVSAEDISRVRAELLTCPELNTSLAGTII  
 ELDNFAKSILITSDMVVDEQGLVFDAFIFAAANYVAQASINKEFSVIGSKCFFYA  
 PLKLGDVLELEAHALFDETSKKRDVKVGVHVKIKMFEATIQQVSTDEHIFKLKRPI  
 NTVKAAENS DSPASTVNPEAIGSALSASLRK"

gene complement(80369..80542)  
 /locus\_tag="DMACINML\_01426"

CDS complement(80369..80542)  
 /locus\_tag="DMACINML\_01426"  
 /inference="ab initio prediction:Prodigal:2.6"  
 /inference="similar to AA sequence:RefSeq:A0H51921.1"  
 /codon\_start=1  
 /transl\_table=11  
 /product="putative lipoprotein"  
 /protein\_id="Prokka:DMACINML\_01426"  
 /translation="MRKYILMLALLFGISGCFVNERGISNRFYDDCREYYDASGTYHK  
 ECPKNWVDIKMTP"

gene complement(80552..81079)

CDS /locus\_tag="DMACINML\_01427"  
complement(80552..81079)  
/locus\_tag="DMACINML\_01427"  
/EC\_number="3.1.31.1"  
/inference="ab initio prediction:Prodigal:2.6"  
/inference="similar to AA sequence:RefSeq:CAL35097.1"  
/codon\_start=1  
/transl\_table=11  
/product="putative secreted nuclease"  
/protein\_id="Prokka:DMACINML\_01427"  
/translation="MRINYKFLNLRKIASDPKLLAFLIFALMIAFVQNYIVQNPSF  
KAQVIRVIDGDTIEVIVNNTSKIRFFGIDAPELKQNFQKQSKVALDKILKDKDEVYIF  
SKDKDNYGRIVAIKLNLDIDINQFLVSQGYAWADTYTAYIKEQEKAQKNKLGWLKD  
DNPIEPYKWRKQNR"

gene 81136..82404

CDS 81136..82404  
/locus\_tag="DMACINML\_01428"  
/locus\_tag="DMACINML\_01428"  
/inference="ab initio prediction:Prodigal:2.6"  
/inference="similar to AA sequence:RefSeq:CAL35098.1"  
/codon\_start=1  
/transl\_table=11  
/product="putative peptidase"  
/protein\_id="Prokka:DMACINML\_01428"  
/translation="MQNVIANFKNLCKIPHCSYETGQMKFLSSYAKDKGFKVSVDKA  
GNIHAIKGNPKICLQSHYDMVCMGEAPKVEVYEENGFLRATNSSLGADNGIGIAIMMS  
AMTEFENLECLFTNDEEVLGMGANSLEHTLSSKMLLNLDHESDDEIMIGCAGGV DIEA  
KLNFNFTKARGKIYELQAQNFQGGHSGINIIHNEKNSIKEMAKFIKENKGEIISFEGG  
ERINSIPKHAKALVHFKNEVKGNEWIKCEFEKEGEFEICDQSKLLNTINAFAHGVRA  
YDKNLDIVQTSINLAILKMNQEIKFELFARSNILDGLKQIEFETLEFFKAFDYKVK  
FNFYPPWEGKANALSDKVLKALKKVPNARVSTIHAGLECGIIEKKQELLCASIGPNI  
HNPSTDEHCEIASVEKISRNVFEVLKDNA"

gene complement(82387..83634)  
/gene="cjaB"

CDS complement(82387..83634)  
/gene="cjaB"  
/locus\_tag="DMACINML\_01429"  
/inference="ab initio prediction:Prodigal:2.6"  
/inference="similar to AA sequence:RefSeq:CAL35099.1"  
/codon\_start=1  
/transl\_table=11  
/product="putative MFS (Major Facilitator Superfamily)  
transport protein"  
/protein\_id="Prokka:DMACINML\_01429"  
/translation="MQKKYKNIIYASLGGILEFYDFVLFVAFLLDIFAKVFFPQNDTFW  
MQINAYIAFGAAYLARPFSGSIVMAHFGDRYGRKNIFYISMLFMVLPFALAFVPSY  
IGILATLVFLIRILQGLAVGTEVSGAWVYVSEFVRGRQIPLALGFISATLTVGLLLG  
NLATLGI RSYFSVQVEVEEYAWRIPFIIGGFFGFALFLRKLSETPEFERIKKENKLL  
NFPLKDALKTYKTSMLVCFLMTVVLTSGVATLMILPKYFEELLSINKTSALWIQNF  
LAVILGALIQQILASKWGSYRISIFSIAMFFGMLFSFYDANFLFYLLACFAQGII  
TFAPVFM TQIFKSELKFSGLSFAYNISYALLGFLTPFIVNAFYKEYIGVYLIVVGCCS  
LFSVFLKRI FARSEAKELSVF"

gene complement(83681..84520)

CDS /gene="cjaA"  
 /locus\_tag="DMACINML\_01430"  
 complement(83681..84520)  
 /gene="cjaA"  
 /locus\_tag="DMACINML\_01430"  
 /inference="ab initio prediction:Prodigal:2.6"  
 /inference="similar to AA sequence:RefSeq:CAL35100.1"  
 /codon\_start=1  
 /transl\_table=11  
 /product="putative amino-acid transporter periplasmic solute-binding protein"  
 /protein\_id="Prokka:DMACINML\_01430"  
 /translation="MKKMLLSIFTTFVAVFLAACGNSDSNASNSLERIKQEGVVRIG VFGDKPPFGYVDEKGANQGYDIVLAKRIAKELLGDENKVQFVLVEAANRVEFLKSNKV DIILANFTQTPERAQVDFCLPYMKVALGVAVPQDSNISSVEDLKDKTLLLNKGTTAD AYFTKEYPDIKTLKYDQNTETFAALIDQRGDALSHDNTLLFAWVKEHPEFKMAIKELG NKDVIAPAVKKGDKELKDFIDNLIVKLGEEQFFHKAYDETLKAHFGDVVKADDVVIEG GKI"

sig\_peptide complement(84434..84520)  
 /gene="cjaA"  
 /locus\_tag="DMACINML\_01430"  
 /inference="ab initio prediction:SignalP:4.1"  
 /note="predicted cleavage at residue 29"

gene 84723..85826  
 /locus\_tag="DMACINML\_01431"

CDS 84723..85826  
 /locus\_tag="DMACINML\_01431"  
 /inference="ab initio prediction:Prodigal:2.6"  
 /inference="similar to AA sequence:RefSeq:CAL35101.1"  
 /codon\_start=1  
 /transl\_table=11  
 /product="putative lipoprotein"  
 /protein\_id="Prokka:DMACINML\_01431"  
 /translation="MKKSIALTLGAIFFSACSNSLDKTTVAKYEERLNAQINETLKD FQQDMGVKIEISNFSCEGDMFLKCSSPNFSVFAKDSTQTEQKLF EAKNLEIYSNEIY TGEEQGLISLKDYYDNLLSKNKNLKTNFTLEGFKLGEKVVSDITTSLSQSEPKIKDYI SKLSSGVFTISFENSLFMKNSDYNNFMKINNQDLNFDMLNFDYKQSLLDFFEKAG IKYNTQTYAIDEKAVEELLDQRGFAQPIQESVTLNFKINSSLDTQGVFENYITIAKG GLEALKIQSQNEEQTLIDKALLALNEITKDTVYKLDLEAKFKPIALS DYPKEGINAV EKLT VNNQDF TETL KILFGFMMIPIMLGGATGF"

sig\_peptide 84723..84782  
 /locus\_tag="DMACINML\_01431"  
 /inference="ab initio prediction:SignalP:4.1"  
 /note="predicted cleavage at residue 20"

gene 85941..86681  
 /locus\_tag="DMACINML\_01432"

CDS 85941..86681  
 /locus\_tag="DMACINML\_01432"  
 /inference="ab initio prediction:Prodigal:2.6"  
 /inference="similar to AA sequence:RefSeq:ADT66289.1"  
 /note="conserved hypothetical protein"  
 /codon\_start=1  
 /transl\_table=11  
 /product="hypothetical protein"

```

/protein_id="Prokka:DMACINML_01432"
/translation="MKILFSPSESKNDTCKEKPINKNSFIFENLDFRMRQVAKKYEEY
IKNADLKALQELFGIKNENEISNFQRDLKNSPTQKAITLYSGVSYEYLNFDILDKKSQ
EYILENTLIFS NFLGVVKASDHLFPYKFKQGAKINDFAIEKFYKEHFSKALDEYLENE
ELLDLRAGFYDKFYTPKRKFSTYKFIKKGKVVSHFAKAYRGILLALCAKIKAKNNTDI
LNHLPSNLSLKEIQNKGLKEEIVLEILD"
gene      86879..87082
          /locus_tag="DMACINML_01433"
CDS       86879..87082
          /locus_tag="DMACINML_01433"
          /inference="ab initio prediction:Prodigal:2.6"
          /inference="similar to AA sequence:RefSeq:ABS44295.1"
          /note="conserved hypothetical protein"
          /codon_start=1
          /transl_table=11
          /product="hypothetical protein"
          /protein_id="Prokka:DMACINML_01433"
          /translation="MQYFFVFLIIVFLFIVFMLIMRYEKKLELLNQSIQNIKEEVNGL
KNITQSNRSLIEKNRSDIENINK"
gene      complement(87085..87825)
          /locus_tag="DMACINML_01434"
CDS       complement(87085..87825)
          /locus_tag="DMACINML_01434"
          /inference="ab initio prediction:Prodigal:2.6"
          /inference="similar to AA sequence:RefSeq:CAL35108.1"
          /note="hypothetical protein Cj0990c"
          /codon_start=1
          /transl_table=11
          /product="hypothetical protein"
          /protein_id="Prokka:DMACINML_01434"
          /translation="MKIFFQGSDEYEIEKSYFYNRAFIVKDKIPNRDKIDFITDSVT
LLKFSDFSFEFDEILKCLYDEDEENTIIVEEIFTTSQTKQDGGVDLPPLVIKDDEALK
NNIKFTPNTFSRVFNKDRFIFIPNTCEQKESIRVEKNQKLNIFETLKITDLNTSFVK
IEILDYDANNDVNFDLDFVPSGASYKYGISQNTMYIILQGKMTSCLLLDFLKS FVYK
NKKELACEKTFVLMNLNHLKLAYELKVFFV"
gene      complement(87826..89091)
          /locus_tag="DMACINML_01435"
CDS       complement(87826..89091)
          /locus_tag="DMACINML_01435"
          /inference="ab initio prediction:Prodigal:2.6"
          /inference="similar to AA sequence:RefSeq:CAL35109.1"
          /codon_start=1
          /transl_table=11
          /product="putative oxidoreductase ferredoxin-type electron
transport protein"
          /protein_id="Prokka:DMACINML_01435"
          /translation="MKFSQISDACVKCGKIPVCTIHEVNRDETTSPRGFLDLLAAYK
EEKLELNKEAKKIFESCFLCTNCVEVCPSKLRVDNAIEEVRYDIAKKFGIAWYKKIIF
FFLRRRKILDLAAKLGYVFQSCAFKIQQGQGNVGMKAKFSMPFVKGRLLTSFNKKSF
LNSNPDIINNGEKTIGFFVGCLANYFYIDTANAVLKIAKEVKINVDLMKEQVCCGAP
QFFTGDFKSVEILAKKNIIEYFEKKLEKLDIIPEATCSAMLKIDLEHFHMQNEPEW
AKRAQKISSRIYMASEYFYKFTNLKELLESKKLNYSITYHDPCHARKMQGVFKEPRE
LLKANYHFVEMSNPNACCGFGGVSMQTDYYDRALSVGLK KASMIDESKACVVS AECSA
CRMQISNALEQNSSKAIFASPLELIAKAL"

```



gene complement(89102..90457)  
/locus\_tag="DMACINML\_01436"

CDS complement(89102..90457)  
/locus\_tag="DMACINML\_01436"  
/inference="ab initio prediction:Prodigal:2.6"  
/inference="similar to AA sequence:RefSeq:CAL35110.1"  
/codon\_start=1  
/transl\_table=11  
/product="oxygen-independent coproporphyrinogen III oxidase"  
/protein\_id="Prokka:DMACINML\_01436"  
/translation="MRDYKAFVKYSKAGPRYTSYPTAVEFNTNFKYEEYIEILKKQNK  
ALSLYFHLPFCRSACYFCGCNVIYTAKEESKERYLKYLQELDILSTLIDTKREVQVM  
HFGGGTPTFFSAKQLESILIKISIFGNFAKDAEISCEIDPRFLNEEQADVLTKNGFN  
RISFGVQDFDEKVQKEIHRIQPFELTQNALKLVRDRGIKSVNMDLIYGLPFQSLQSFT  
KTLEKAMLLNPDRLAIFNYAHVPWLKKNMRKFDENTLPSPDVKLEILEFCEKFLTQNG  
YKMIGMDHFAKEEDELFKALENGTLHRNFQGYTTKGGADLIGIGLTSIGEGQSHYAQN  
FKDMPSEAAISEGRLPFERGVKLSYDDELKRAVIMDLMANFRLDIKAIKEFKIDFK  
EYFKEDLEALEEYKEFIDLNENFILVNETGVLLIRNIAMCFDAYMKNISEDKKVFSKT  
V"

gene complement(90444..90935)  
/locus\_tag="DMACINML\_01437"

CDS complement(90444..90935)  
/locus\_tag="DMACINML\_01437"  
/inference="ab initio prediction:Prodigal:2.6"  
/inference="similar to AA sequence:RefSeq:CAL35111.1"  
/note="hypothetical protein Cj0993c"  
/codon\_start=1  
/transl\_table=11  
/product="hypothetical protein"  
/protein\_id="Prokka:DMACINML\_01437"  
/translation="MKELEKYSNCLKRIDEFSQNLGMKKEDRAIFEMKQSENEKCL  
VLKNGSFDSPPEWFIMDENDQIHTLVSLNSLKNILENLKQAQKENFELRLEKAIYQQI  
PIDFSDVWIVAMDEIKRKAQEGIMEISIDLEKLLADIKKEHPNLFVDMQAMVERVKNN  
ERL"

gene complement(90973..91896)  
/gene="argF"  
/locus\_tag="DMACINML\_01438"

CDS complement(90973..91896)  
/gene="argF"  
/locus\_tag="DMACINML\_01438"  
/EC\_number="2.1.3.3"  
/inference="ab initio prediction:Prodigal:2.6"  
/inference="similar to AA sequence:RefSeq:CAL35112.1"  
/codon\_start=1  
/transl\_table=11  
/product="ornithine carbamoyltransferase"  
/protein\_id="Prokka:DMACINML\_01438"  
/translation="MRHFLTLRDFSKEYEILSLVEHASELKKNPKKLLQDKTLAMIFEK  
NSTRTRMAFELAITELGGKALFLSSNDLQLSRGEPKDTARVIGAMVDFVMMRVNKHE  
SLIEFAKYSKAPVINALSELYHPTQVLGDLLTIKECGMKQDDVAKVAFVGDSSNMCS  
WLITAAIILGFDFSVALPKNYEINSEILEFAKEKAKISGAKILLTHDKFEAIKGDVII  
TDTWVSMGEESEKEKKIKDFDGFIIDEEAMSAANQDAILLHCLPAYRGYEVSEESFEK  
HSKIVIFEEARNRLYVVKALLCFLDKEKQDFI"

gene complement(91893..92876)  
/gene="hemB"  
/locus\_tag="DMACINML\_01439"

CDS complement(91893..92876)  
/gene="hemB"  
/locus\_tag="DMACINML\_01439"  
/EC\_number="4.2.1.24"  
/inference="ab initio prediction:Prodigal:2.6"  
/inference="similar to AA sequence:RefSeq:CAL35113.1"  
/codon\_start=1  
/transl\_table=11  
/product="delta-aminolevulinic acid dehydratase"  
/protein\_id="Prokka:DMACINML\_01439"  
/translation="MFKRFRLRLNESLRAMVREHTLSVNDLIYPLFVVNGKGIKKEI  
SSMPDVFQMSLDEILKECKTISELGIKAIILFGVLENDKKDSCGSDAMDDEGLIARSI  
REIKKEFPNLFIIISDLCFCEYTDHGHCGIIDPKTKSVDNDATLEISAKQALVHARAGV  
DMIAPSGMMDGIIETLRKALDEEGFENLPIMAYSTKFASSYYGPF RDVADSTPSYGDR  
KSYQMDFANGKEALEESLEDEAQGADILMVKPALAYLDVVKEISLHSNPLCVYNVSG  
EYAMLKVAGRAGVIDYEKVLVYETMIAFKRAGAKLIITYHAKELAKMLKGEK"

gene 92933..93493  
/gene="ribA\_2"  
/locus\_tag="DMACINML\_01440"

CDS 92933..93493  
/gene="ribA\_2"  
/locus\_tag="DMACINML\_01440"  
/EC\_number="3.5.4.25"  
/inference="ab initio prediction:Prodigal:2.6"  
/inference="similar to AA sequence:RefSeq:CAL35114.1"  
/codon\_start=1  
/transl\_table=11  
/product="GTP cyclohydrolase II"  
/protein\_id="Prokka:DMACINML\_01440"  
/translation="MDIKISEIANLPSKWGSFQIQSFKEGEKEHLKCFKNTPDILNL  
RIHSECLTGDALGSLKDCGQLEFSLKYIEKHGGMVIYLRQEGRGIGL FNKVNAYAL  
QDKGFDTIKANHLGFKADERTYEIVEFILKHYKISKVNLLTNNPQKIHSIQDKIMAR  
VPILINPNRFNANYLEIKQNQMGHLL"

gene 93490..94089  
/locus\_tag="DMACINML\_01441"

CDS 93490..94089  
/locus\_tag="DMACINML\_01441"  
/inference="ab initio prediction:Prodigal:2.6"  
/inference="similar to AA sequence:RefSeq:CAL35115.1"  
/codon\_start=1  
/transl\_table=11  
/product="putative methyltransferase (GidB)"  
/protein\_id="Prokka:DMACINML\_01441"  
/translation="MNLDFLNLILSDFNEEDFRAKLKTYKELLNKFNRHNLTLQKNI  
DENILDSIEILKYFDFSKAKNIVDIGSGAGFPAIFLAFILPSKFHLEPNPKKAAFLR  
SIKIECDLTLTIHKEKVENYKSAFKADIITSRALMDVKPLIKLCLNISDQKTIFILW  
KGSEVFDEVEGLKDYDIFENGLRRYCVLKNTQSGINTTS"

gene complement(94090..94662)  
/locus\_tag="DMACINML\_01442"

CDS complement(94090..94662)  
/locus\_tag="DMACINML\_01442"

```

/inference="ab initio prediction:Prodigal:2.6"
/inference="similar to AA sequence:RefSeq:CAL35116.1"
/codon_start=1
/transl_table=11
/product="putative periplasmic protein"
/protein_id="Prokka:DMACINML_01442"
/translation="MKKMFYSIAASLILATSLSAVSFNQDSLKVSFEGYKTEDMVGVG
GEFKDVKYKFSKNTSTLANYLKGARAVVNPSSVFMGEGNEIITDNLAKVFFPSLLGNS
DIKVVFKDVGAGENKGVISARVTIDKKSTLIPLSYTIENKFKVAKGQLDLHAFKNSSQ
ALKALSDVAPGHGGISWPLVDIVFSADVVQ"
sig_peptide complement(94594..94662)
/locus_tag="DMACINML_01442"
/inference="ab initio prediction:SignalP:4.1"
/note="predicted cleavage at residue 23"
gene complement(94754..95848)
/locus_tag="DMACINML_01443"
CDS complement(94754..95848)
/locus_tag="DMACINML_01443"
/inference="ab initio prediction:Prodigal:2.6"
/inference="similar to AA sequence:RefSeq:CAL35117.1"
/codon_start=1
/transl_table=11
/product="putative integral membrane protein"
/protein_id="Prokka:DMACINML_01443"
/translation="MIKKIEHYKNILISNFKGLIFTACIVVFAMILYSSVQSIKDTTHL
AAAFIIGALLSPWFFKYQHHLQAGVHFSAKKLLRLGIILYGFNITLTEL SVGLK
GFMLSMIVIFFIFILSLIIGVKVFKLDKETSMLVGAGSAICGAAAVLALESSLKSDPF
KGILAVGTVVIFGLVFMFLYPMAFSLDLFPYFDQRAMGIFMGATLHEVANVAGAAEMA
KDMANFDQSASNAIIIKMMRVILLVPFLLIVTYFFAKNQHSSSGKTAKSISIPYFAF
IFLGVIVINTYLASKENFLGISTSDIISFGKLLCTLCIVFAMAALGLQIDFKKFLKSG
SRVFGLAFLVGLVLFVGGYFLTLFFRGMLW"
gene 95993..96874
/locus_tag="DMACINML_01444"
CDS 95993..96874
/locus_tag="DMACINML_01444"
/inference="ab initio prediction:Prodigal:2.6"
/inference="similar to AA sequence:RefSeq:CAL35118.1"
/codon_start=1
/transl_table=11
/product="putative transcriptional regulator (LysR
family)"
/protein_id="Prokka:DMACINML_01444"
/translation="MKIKDMEIFDLLNTQSPHTANNFAITQPNVSIKLEQDLG
GVLFERLGKLLPTPKALYLGKIWLKLVQDYRSLEELSDENTLLGEINIAATQSIAE
HFLAPILDFDKSEFSNVKIHFTQNSKECFNLLKNGDIEFAIEAELNPTLIEHEGLK
MQFWKKDELIVASSDKNLSQREFYIDELLDQKWILRETGSLRDKFLNEIGNVSKKLLK
FFLELDRMSAIKELVIQKNAISIFSCKSIEKELKNSILYEVKLNINLWRNFYTLKRK
NYNFRRALEKFEKIFQQ"
gene 96950..98815
/gene="rpoD"
/locus_tag="DMACINML_01445"
CDS 96950..98815
/gene="rpoD"
/locus_tag="DMACINML_01445"

```

```

/inference="ab initio prediction:Prodigal:2.6"
/inference="similar to AA sequence:RefSeq:CAL35119.1"
/codon_start=1
/transl_table=11
/product="RNA polymerase sigma factor (sigma-70)"
/protein_id="Prokka:DMACINML_01445"
/translation="MNAKTQDMELEELFKENEKDYITYEKLVKYFGKQPNSATAKKVQ
TLMKKYKVQLFSAAEIAQMKNIEDAKRLQEEKQKLQDTSLENEFDLANENDLLEWSRS
DSPVRMYLREMGQIALLNKDEEIEISKKIELGEDIIIDAFCSVPYLIDFILDYREPLI
NRERRVKELFKSFDDEEKNDKLDLELEDEEENDEEENEETPKKTSKKEDERTLKV
IEKFKALEKAKKDWLKVSCKDKESGDEILDKLGIAFKKNILKEKLMDLGPTSCLISEIV
KSMETALKSDEEFDKELKRLEYRLLPMFSEELKSRHANILKDITKLSKEEITERAETT
MVSTYMEIKKLFQTKASEKSFDFLEKERLKEILEQIKRGKKISDEAKTRMAKSNLRLV
VSIKRYTNRGLPFLDLIQEGNIGLMAVDKFEYKRGYKFSTYATWWIRQAISRAIAD
QARTIRIPIHMIETINQINKIIREHLQKDGKEPDVSVIAKEVGLSVDKVKQVIKITKE
PISLEAPIGSEDDGKFGDFVEDRNSLSPMDHILKDDLKEQIDEVLDQLNDREKAVIRM
RFGLMDESRTLEEIGKELNVTRERVRQIESSAIKKLHKPKVGRKLNKNIIEGWK"
gene complement(98816..99325)
/locus_tag="DMACINML_01446"
CDS complement(98816..99325)
/locus_tag="DMACINML_01446"
/EC_number="3.1.3.-"
/inference="ab initio prediction:Prodigal:2.6"
/inference="similar to AA sequence:RefSeq:CAL35120.1"
/codon_start=1
/transl_table=11
/product="putative phosphoglycerate/bisphosphoglycerate
mutase"
/protein_id="Prokka:DMACINML_01446"
/translation="MKKIYILRHAKAVKNEEVQDFDRKLSKRGKEDLEKLFYNLKFHK
INFDLILSSPSKRTAKTAKKIAKFYNLKDKKIQFIDELYLADLSKIYQILQTIKKNY
EVLLVGHNPTLMELGEYLGSLCLTSFPTSSMLCLEFDIEDFKDLKAHSGKVIFFEHVR
KLKEEKELD"
gene complement(99322..99840)
/locus_tag="DMACINML_01447"
CDS complement(99322..99840)
/locus_tag="DMACINML_01447"
/inference="ab initio prediction:Prodigal:2.6"
/inference="similar to AA sequence:RefSeq:AFU43057.1"
/codon_start=1
/transl_table=11
/product="rhomboid family protein"
/protein_id="Prokka:DMACINML_01447"
/translation="MNVILLILINILFYFTIPYEYSSLLGLNILFFKGAYWQILSSMF
IHGNLTHLILNMIVLFQFGRILEPYLGAFRFFLLYIIGGIMCSILSAFYVYFSFNQLS
EMINLVGASGAICVLMGYAFLDKSSTKGLIVAILLMSFAPLLMGVNVAWYGHIFGFI
CGYFLGKLRRKI"
gene 99939..100355
/locus_tag="DMACINML_01448"
CDS 99939..100355
/locus_tag="DMACINML_01448"
/inference="ab initio prediction:Prodigal:2.6"
/inference="similar to AA sequence:RefSeq:CAL35122.1"
/codon_start=1

```

```

/transl_table=11
/product="putative periplasmic protein"
/protein_id="Prokka:DMACINML_01448"
/translation="MKIKFYGIIAILSSFLNADMIISPNEFPSISKEFLKNNFQAPIG
IVQRDRHSYEVYLSDGTELEFESDGSWKEIESKVFPFDLNLFPNLTNIIQNKFPNTK
AREIERKINYKIKLTTNIEVHIDFNGTILYTEYDD"
gene complement(100451..102055)
/locus_tag="DMACINML_01449"
CDS complement(100451..102055)
/locus_tag="DMACINML_01449"
/EC_number="3.4.24.-"
/inference="ab initio prediction:Prodigal:2.6"
/inference="similar to AA sequence:RefSeq:CAL35123.1"
/codon_start=1
/transl_table=11
/product="putative membrane bound ATPase"
/protein_id="Prokka:DMACINML_01449"
/translation="MKNKKIILISFLILCLLFGILYFKNEPKYIDENLYQSLLSQNLI
EKAVIDKDEIWLKAKGESYVIVKDGIDIKVLLSKVPVEIKKDNTLWTFVFLVFLIAL
LLSLVYFTRKKELAKYPISSKTQAQTSTTNLESSNIKPVISNITFNDVAGVDEVKMEL
SELVDFLQNPKKYKEFGVKMPKGVLMVGPVGVKTLIAKAVAGEAGVPFFYQSGSSFV
EIYVGMGAKRVRELFRAKMMAPSIIIFIDEIDAVGKARGEMSNVERDSTLNQLLTQMD
GFEDNSGVIVIAATNKIELMDPALLRSGRFDRIIFLSLPDFKDRLKILEIYMKGKNNN
IDLNKIAKASVGFSGAGLETLVNEAAINALRRNSALVEESDFYAVLNKVLLGKKKILS
FNDEEKVIQATYQAAKALSAYYFDIGFEKITLIEDRFKEYEHAIRSKSELINRIKVVY
AGSRAMGLIYNESYTNQNDFLVKELFDYMMSFDMLEPNLSEIKKEVDEFLFPLKE
KISMLAKILLEKEKIEYSDVKEVIQI"
gene complement(102058..103308)
/locus_tag="DMACINML_01450"
CDS complement(102058..103308)
/locus_tag="DMACINML_01450"
/inference="ab initio prediction:Prodigal:2.6"
/inference="similar to AA sequence:RefSeq:CAL35124.1"
/codon_start=1
/transl_table=11
/product="putative MiaB-like tRNA modifying enzyme"
/protein_id="Prokka:DMACINML_01450"
/translation="MKEKVFFKTFGCRTNIYDTELLKSYVKDYEIVNDEEKAQIIIVN
SCTVTNGADSGIKSYINSMQKKGIRVILTGC GAVSKGKELLDKKQIFGVLGASNKDKI
NEFLGLKTSFYELGNLNFIDKDIVCEYENHTKAFVKIQEGCDFACSYCIIPSVRGKSR
SVDEKALLKQVEILGANGYSEVVLGTGTNIGSYGLKNGTTLGELLQKMGQISGIKRIRL
GSLEPAQIDESFLEILDEKWMERHLHIALQHTSEKMLRIMRRRSHTDNDLKLFNIIAS
KGYALGTDIVGHPGETKELWDEALKHFQEFPLTHIHAFIFSPRNTHSATMKDVTNG
AVAKERLNTLKAIENNNYQFRKRVKTPLEILVENQKDGFFEGYDQFFNKIKIKSSKD
IAKEWLKLEREYVQEKNHFADLKG"
gene complement(103305..104876)
/locus_tag="DMACINML_01451"
CDS complement(103305..104876)
/locus_tag="DMACINML_01451"
/inference="ab initio prediction:Prodigal:2.6"
/inference="similar to AA sequence:RefSeq:AHY40213.1"
/codon_start=1
/transl_table=11
/product="mechanosensitive ion channel family protein"

```

```

/protein_id="Prokka:DMACINML_01451"
/translation="MRKILLLLCFSLFAFADINRTIINNINEKISNLDTVIGASIWDV
RYENFIKYQDINDELIIKLELKKIEDAHLQDELKRKIATLEEQLNLVKEYKELNFAH
SLSAPEDIETLSKLTNPLAIIGAFSHIKKLRGEKEEYAFKFNFDFKNLVEKIREKNLEL
KELVNLESNIENIEALKASDKKLEEFDQALKFASVSYSVYEKKIDDEITRVS AEIKAQ
GLRAINIVVAIVVAIAFMLKFAKKYIKDNERYYTATKIINFINLNIIFLILLFAY
IENITYLVITILGFASAGLAIAMKDMFMSMLGWCVIVFGGSFRVGDVVKVFQNDTTYVG
DIIDISFLRITLYEDITLETYSKNRRRAGRIVFIPNNYVFTNLISNYTHHGMKTILDGI
DISVTFDSNIEKAQAIVEEIVNRLAKGYTELAKKTMKRLQNEYSIRNPKVEPRFFVFF
EHWGMRISAWYMTNSYAALILRSAISKEIIKEFNKHEDIKIAYPSQNLVGLNLQAPF
GTHYNSTHFHTKDSN"
sig_peptide complement(104826..104876)
/locus_tag="DMACINML_01451"
/inference="ab initio prediction:SignalP:4.1"
/note="predicted cleavage at residue 17"
gene complement(104873..105928)
/gene="aroB"
/locus_tag="DMACINML_01452"
CDS complement(104873..105928)
/gene="aroB"
/locus_tag="DMACINML_01452"
/EC_number="4.2.3.4"
/inference="ab initio prediction:Prodigal:2.6"
/inference="similar to AA sequence:RefSeq:CAL35126.1"
/codon_start=1
/transl_table=11
/product="3-dehydroquinate synthase"
/protein_id="Prokka:DMACINML_01452"
/translation="MQINVDLKENAYKVYIDELDSLELDAKVFILSNPKISGLHLKTL
LSKIKAKELFIATIEDGEEYKNLVTLEKILNQMFNSKLNRSKILISFGGGVISDMGGF
AASIYQRGIDFINIPTLLACVDAAVGGKTVNNAFGKNLIGTFYQPKAVYCESEFLR
TLGRRELAAGMAEFIKMAAMFDKDLLGFIEAIDEESFLNATCENEIFTQIISKVSELK
ARVVECKESGLRMLLNYGHTFAHVIENFTDYKQYLHGEAVAIGMNMNARLALKLGL
LNKEECERIEKILLQFNLPHTHYKIENINEFYEAFFMDKKSSNQKLNFILANSLGKGM
KDDIAKEVVLETLKEFQ"
gene complement(106094..107494)
/locus_tag="DMACINML_01453"
CDS complement(106094..107494)
/locus_tag="DMACINML_01453"
/inference="ab initio prediction:Prodigal:2.6"
/inference="similar to AA sequence:RefSeq:CAL35127.1"
/note="conserved hypothetical proetin Cj1009c"
/codon_start=1
/transl_table=11
/product="hypothetical protein"
/protein_id="Prokka:DMACINML_01453"
/translation="MNHILIIIDGILAKHFLERLCFEKGLGYFFTIVCQNEESINLGT
NNEYIEIHFFDPTSTARLENLMNKSFKQAFIYMQNEFETKKTYEALRSLDNLNIEIM
DFWGLNINDVHANLADARMTLSRRFMDLLPDIALTAYCVGLGVGEVMEVKIPAGSIFA
YRHISSIQQRWRIVLIYRNSKIYFVKPSFVLQPNDSILIVGDPVVLQSI FHNIRGKV
GQFPLPFGSNIFTLIDMKKMSQVQERLLDITLQLVKRSNAKKFFIRVLNPKLGTLYD
RMKQLSDEQESIFFDFNTDFKNLNSFLENNDIGIILTDFKHFEQEKKTFELKIPVL
KIGEGKFENIQNAVILSADETELENNANVITDLKQLDFDVTLYYYNPNLQNTTDMEE
YFGSLSKLYDKNIQIISKNDENPILSLSYRADLLQFVVSFEKGLLDGEFSKSLSTNLNR

```

HYSKMRQHYQLFIPVE"  
 gene 107524..108654  
 /gene="tgt"  
 /locus\_tag="DMACINML\_01454"  
 CDS 107524..108654  
 /gene="tgt"  
 /locus\_tag="DMACINML\_01454"  
 /EC\_number="2.4.2.29"  
 /inference="ab initio prediction:Prodigal:2.6"  
 /inference="similar to AA sequence:RefSeq:CAL35128.1"  
 /codon\_start=1  
 /transl\_table=11  
 /product="queuine tRNA-ribosyltransferase"  
 /protein\_id="Prokka:DMACINML\_01454"  
 /translation="MEFKLKHKDNLARVCEITTAHSTFETPIFMPVGTGAVKSLDAI  
 DLKEKLNAKIILANTYHMYLRPGSKIVKHFGGLHGFTNFDRSFLTDSGGFQAFSLSAN  
 SKHFQDGIIEFKSHIDGSKHLFTPksVLDtQYDLNSDIMMILDDLIAlPATKERIKVSV  
 DRTIKWAKEAIDYHKQMqIQGLGLKQNI FGIIQGGTDYEERKRCALALNEMDFDGLAI  
 GGLSVGEENALMYETVENLNPFLDENRPRYLMGVGTPEDLVENIERGVDMFDCVMPTR  
 NARNGTFFTNGKFNiKRAEFINDHESIDNECSCYTCRNFSRGLNHLFKAKELTFFR  
 LASLHNLHYLTLVAQAREAIKKSEFKKFKYEFYAKRLTNGM"  
 gene 108644..109414  
 /locus\_tag="DMACINML\_01455"  
 CDS 108644..109414  
 /locus\_tag="DMACINML\_01455"  
 /inference="ab initio prediction:Prodigal:2.6"  
 /inference="similar to AA sequence:RefSeq:CAL35129.1"  
 /codon\_start=1  
 /transl\_table=11  
 /product="putative CorA-like Mg2+ transporter protein"  
 /protein\_id="Prokka:DMACINML\_01455"  
 /translation="MVCDENLSKFLANKNLNTLYMDFLGQKILILNSYNPKTKKGNFS  
 VFGFEDDKIFKLEDTQFKPFLNDFLSTIRTILEDYKNENTHFYILERKENILLKGN  
 LIKNFFKKSFILKQKINKNLKNISLLDEALSSLAGTSPHKKALKPINFAVGIALKNNK  
 EMITRLNELHLLMSAIKNEKINQSLYFLSILSAIFLPLNLIVGFFGMNTNDLFLSNVK  
 NATWYVFALICFILLSGLIIRKKRKELEFEDKILSK"  
 gene 109470..109546  
 /locus\_tag="DMACINML\_01456"  
 tRNA 109470..109546  
 /locus\_tag="DMACINML\_01456"  
 /product="tRNA-Arg"  
 /inference="COORDINATES: profile:Aragorn:1.2"  
 /note="tRNA-Arg(gcg)"  
 gene complement(109655..109912)  
 /locus\_tag="DMACINML\_01457"  
 CDS complement(109655..109912)  
 /locus\_tag="DMACINML\_01457"  
 /inference="ab initio prediction:Prodigal:2.6"  
 /codon\_start=1  
 /transl\_table=11  
 /product="hypothetical protein"  
 /protein\_id="Prokka:DMACINML\_01457"  
 /translation="MIVANGAKVYTLGDYSNTLLIAYGKDHVIDHNGELKVTGKESIA  
 INIDFGDNSLGNTEEYRVALICIKFKDNIDFSTKLEAGAKF"

gene complement(110052..110258)  
/locus\_tag="DMACINML\_01458"

CDS complement(110052..110258)  
/locus\_tag="DMACINML\_01458"  
/inference="ab initio prediction:Prodigal:2.6"  
/codon\_start=1  
/transl\_table=11  
/product="hypothetical protein"  
/protein\_id="Prokka:DMACINML\_01458"  
/translation="MAHIELDNSLSHQSWRNYNFYMEAELALLQDLGYVFDKRLYYG  
ILFMKTIFKTGKAIMVIMARKDGGK"

gene complement(110286..110609)  
/locus\_tag="DMACINML\_01459"

CDS complement(110286..110609)  
/locus\_tag="DMACINML\_01459"  
/inference="ab initio prediction:Prodigal:2.6"  
/codon\_start=1  
/transl\_table=11  
/product="hypothetical protein"  
/protein\_id="Prokka:DMACINML\_01459"  
/translation="MFNRVLQGESIDTIRQEFIDIAEGFFTKEDVEYLGHINIYPTAL  
PKNGNQFDFTFFTHELFYALGMLSLISNCEGNLGEFCIDGFLNSFSDHLYMMSKSSS  
GDENS"

gene complement(110827..111597)  
/locus\_tag="DMACINML\_01460"

CDS complement(110827..111597)  
/locus\_tag="DMACINML\_01460"  
/inference="ab initio prediction:Prodigal:2.6"  
/inference="similar to AA sequence:RefSeq:CKG86263.1"  
/codon\_start=1  
/transl\_table=11  
/product="hypothetical protein"  
/protein\_id="Prokka:DMACINML\_01460"  
/translation="MQKTLQIDLEKRKALENFKNLALLGLGGTMLLNLKEQPLDFNQE  
LTYINTYDKYLNLKDSFYIPSTLLSLLQLTQKSKEAFYINVLINSDTYKPNLLQYA  
ITQKQEQENVVYALKNDENLNTSFTNLNALKLALAEKNFYLNFDLNSKESLLNFYNL  
LLKDKNLNSYFYSKDNHFYIHEKKIQNIENQYMDLDFKMNLGLYLKLLNDFKTLNKF  
LIKILEALTQNNIKTLYLKSNDKAYTLTSMLMNLVR"

gene complement(111620..111847)  
/gene="trxB\_4"

CDS complement(111620..111847)  
/gene="trxB\_4"  
/locus\_tag="DMACINML\_01461"  
/inference="ab initio prediction:Prodigal:2.6"  
/inference="similar to AA sequence:RefSeq:CKG86610.1"  
/codon\_start=1  
/transl\_table=11  
/product="thioredoxin reductase"  
/protein\_id="Prokka:DMACINML\_01461"  
/translation="MDTLVLSAKLAALTPQGYPNAPYYFTPERLEWIYKRGYLDKLL  
DPRIPAIYRYNFPRELRAKILAYAKEHNIKD"

ORIGIN

1 atttgatca tcttaagggt gtaatgaaa aaataatddd agatagtggt ttttaagcctg



61 atgaatagaa aagattaata tgcgtaaaga tcaagaatat gcagaagaaa ggTTTTatgg  
121 gcaaaaaggc ttttgaggta tttaaaaatg atgaaatagt aaaaaacaac ttgaaacttca  
181 gagcatggat taatgatggc ttagaggaga attaattata agaattagcc atgcatttat  
241 aaaagcataa acaaagtaaa acttatttca tagttttaac tatgattagc taaaaaatac  
301 ttagttatta agtattgtta attaaatfff gtatatggtt gtgatacaaa agaaagaaat  
361 aatattgatg caaattataa attaaactca atatttgata attttaatac atttaattcg  
421 tttcaagtgt tattatattg ttctggtaat ttttaaaata atatgaaaat acctttatta  
481 ccatcagata tatattgtag aatttgattt ttattaagaa catcgtctac taagtacttt  
541 cttaaactac aaaaagcaat atttaattgt atttggtaaa tttttaatga ctaaaaaacg  
601 gtttttcgcc agcatttact ccataaaaca cctccatttc gtggattttt tagcttacga  
661 taggttgaaa ttatactcat attttatatt ttttaattac tttttacttt ggctgtaaaa  
721 taaataatff gtgttgaata taagcctgat atttctattt ttcttaatat atacctttact  
781 tattatattg aattaaatg tttatattaa ttcaaaataa aagcgaaaaa agcctcttgt  
841 atttataagc gataaagtct atttttatta tactttgtta ttaataaaaa ggaattttat  
901 gggataaat gaaactactt ttgaaatcat ctagagaaa ttaaacaag caaatttaaa  
961 cactagatcg aagggatcta tgtttgaaaa actttcaaaa catcttttaa aagaaaaaga  
1021 tacagcaagt atttataaaa atatttatct ttgggatgaa tgggataaaa aggatgggca  
1081 agattgtggg atagatttaa tcattcaaac aaaagatgat gattatattg cagtacaatg  
1141 taaatfffft gaaagctcaa aagtagattt aaaagattta agcacttatt ttagcaaatt  
1201 acaaagtgga gtaggggaga ttaaatttag caaaggattt atcataagca ctagcgatct  
1261 cactcaaac gctaaaaaag aaatagagca aatttcaaaa aatataccta tagaattgat  
1321 aactttggaa gattttttaa actcaaactat cagttgggat aaatttgatc caaataattc  
1381 tttagaattg cctattattg caaagaaaaa accaagagaa caccaaatac aagctataaa  
1441 caatacaaaa gaatatttcg caaacaaaaa taacacaaga ggcaagctta tcatggcttg  
1501 tggactggg aaaacattta cttctttaa aattatagaa gaaattactc ctaaaaattc  
1561 catcgtttta ttttagctc ctagtatagc ttttagtagg caaacattta gagaatattg  
1621 taaagaaaaa actgatgatt ttgttgcttc tattgtgtgc tcagatagta aatcggttaa  
1681 aagcattgaa gatgatatag atattttaga attgcctatt cctgcttcta ctgatactca  
1741 aagcattaaa aaagcttacg atatagctaa aaaagacaat aaaagattta tcatcttttc  
1801 tacttatcaa agtgtagaaa aaattatgca agcccaaaaa caaacgatc tagatgaaat  
1861 cgaactaatt atttgcatg aagctcacag aagcgtagga aatttatact caggaaaaga  
1921 aaaagataaa ctaaatacct ttactctatg ccatagtaac gaaaatatta aagctaaaaa  
1981 aagaatffat atgagcgcta ctcaaagat ttattctagc tctcaaaaaa ataaagcttt  
2041 agaaaatgat aatgaagtat tttctatgga tgatgaagaa atttttggag atgaaatffa  
2101 tagtattaat tttagagaag cagttgaaaa aggcttactt actgattata aagttattat  
2161 tctagctatc aaacaagaaa gtattgcaaa catagcaaat acaaccatag caaaattaaa  
2221 agatgagaaa aatgtagatg aaaaatatgt agatattgat ttcgtatcta aaattatagg  
2281 tacgcataaa ggtttagcaa gaaatgattt agttgctctt gatgaaaata ataaaataga  
2341 taatgattff ttagaagaaa tggatagtaa tctttcaaga agagttataa atttttgcaa  
2401 aagcataaga gattcaaaaa atataaccaa ttcttttaag attattatgc aatgttatga  
2461 tgaagcattg aaaaaagatt cttttaaaaa tcttaatata aacatagatc atgttgatgg  
2521 acaatgaac tccaatgtaa gattaaaca actaaacaat ctaactcac cagaagaaaa  
2581 cacttgtaat atattaagca atgcaagatg cttaagtgaa ggtgtggatg tgcctgcttt  
2641 agatagtgta gtattttttg atggaagaaa ttctatggtg gatataattc agtcagtagg  
2701 tagggtaatg agaaaagctc caaataaaaa aacaggctat atcactatgc ctttagcatt  
2761 aagcgaaac gagctttcaa atttagatga agctataaaa aataccaatt ttttaaatat  
2821 atggaatata ttaaaagctc taagaagcca cgatgatact ttggtaggatg aagctgtatt  
2881 taaggaaaag attaaaatag cagtagctga ttatgtagga gatgataatt catcaacaa  
2941 tacagataaa agctatgagc caagcttgtt tgatagcttt accctgagcg aacttgcaaa  
3001 tactctatat aatgccatac caactaaact tggcgataaa ggttattggc aaagcttttag  
3061 tgcaaaaaca gccaaaatag tagaaaaatt aaacattaga ttaaagtcta tttttaaaga  
3121 tcaccctgaa attttagaag aatttttaac ttcttaaaa gaaaacattc acccaaatat  
3181 caaagaagat gaagccatag atatgatatg ctctcacatt atcactaac ctatatttga  
3241 tgttttattt gataaaaata tggatgataa tcccatagga aaagctcttg atgaagtaaa

3301 ccaaaagcta aatacctttg gtttggatga tgaagaaaca agatctttta aagctttata  
3361 taaaagcgta gaagaaaatg taaaattagc aaaaagtcaa aaaagcaaac aagaacttat  
3421 taaaatttta tacgatactt tcttttagatc agctttttaa aagcaagctg aaaaattagg  
3481 tatagttttat actcctatgc aagttgttga ttttatactt cattctgtta atgagctttt  
3541 aaaaagacat ttttaatacag attttaacga tgaaaatgta aaaatctttg atccatttac  
3601 tggcacggga agttttatca caagattggt aagtaaagaa aataacttaa ttagcgatga  
3661 aaatttcaaa aacaaatag aaaatggaat ttttgctcaa gatattatit tacttgctta  
3721 ttatatagcg cttattaata tcacgcaaac aggtaatgaa aggataaata ctttagataa  
3781 atttaaaaaat atagccttag ctgatagtct tgattactta gataaaaaaa tacaagatag  
3841 tggcttatttt gctttagaat ttaaagattt agaagaaaat aaaaaaatca aagacttaat  
3901 agccaacgaa aaaatcaaag ttattatagg caatcctcct tattcagctg gagcaagtag  
3961 tgaaaatgat aataatgcaa atatttctca cccaattta gaaaaacgca tcaaagacac  
4021 ttatagcaaa gaatcaaatg caaaattagc taaaaatact agagatacac taatccaagc  
4081 cttgcgtatg gcaagtgata aaatagaaga caatggtatt ataggctttg tagtaaattg  
4141 aggtttttata gatgcaacaa gtgctgatgg ctttagaaaa tgcgtagcta aagaatttag  
4201 tgatattttat attttaaaatt taagaggaaa tgcaagaact tctggagagc aaagaaaaaa  
4261 agaaggtgat ggtgtatttg atagtggctc aagagcaagt gtggctatag tattttttgt  
4321 aaaagacaca agtattaaaa caaacaaaat tcattattat gatataggag attatcttga  
4381 tagacaaact aagcttgata aattagagaa ttttaaaagt gtattaaatg tgccttttgc  
4441 aatatataatc ccaaatgaaa aaggtgattg gatcaatcaa agaggagggg gctttgataa  
4501 tttaatgcct ttgaaaagca ataaaaatga atacggaatt tttactataa attcctgtgg  
4561 tgtagtaact gggcgggata gctgggttta taatttttct aaagaaaagc ttgcaaattc  
4621 tatgcaaact tgtatagcta cttataatga agacttggtc aaatttgatc accaagcatt  
4681 ttttagagaaa aataaaaaatg ttaaaaactc tgagctttat aagcaattaa atgataaaga  
4741 tattactata gataatacca aaatagcttg gactagagct ttaaaaaagg attttataaa  
4801 taatgaaaaa attaaagaat ttaatcaaga aaatataaga gaaatttctc atcgtccctt  
4861 tactaaagaa tatctttact ggaataaaac ttggaatgaa gaacaatatc aattgcaaaa  
4921 aattttccct aaaaatacag atgagaattt gttgataaat acaactaaag gagatttttc  
4981 agctttaata tctgaaaata taccgatta tcattttatt ggtgataccc aagcttttcc  
5041 actttatttt taccaagaaa atggaagcaa agaatacgtc ataagtgatt ttgctttaga  
5101 tgaattttaaa aaacaattac aagatgaaac tataaacaaa gaagacatat tttattatat  
5161 ctatgcgata tttcatcata aaagttattt ggaaaaatac aaatttgaac tttcaaaaga  
5221 agccccaaga atacctataa gtaaagattt taaaaactta agtgttttgg gtaaaaagct  
5281 agccacttta catttgaact atgaaaataa tgaatgttt aaagaagtag aatttaaaga  
5341 tggagtttta gctgatattg gtaatgatga gttttataaa gtcactaaga tgaaaaaact  
5401 aggaaatgat attttttata atcaaaatat cactataaaa aatataccta gcaagcttt  
5461 tgagtataga atcaatggaa aaagtgcgat tgattggatt atcgatagat accaaataag  
5521 catagataaa aaaagcttga tagaaaataa tccaaatgat tatcaaggtg gtaaataat  
5581 ctatgaactt cttttaaaaa tcattgattt atctataaaa agcgttgatt tgatggatga  
5641 gattagtaaa atggagtggg agtgatgaag aaagaacaat ataaagcatt tttaaatact  
5701 agtattgaaa atattaaaaa agcacttgat gaaaattatt taagcatatt tgcaggagct  
5761 ggaatcagtg ctaattccgg cttacctact tggagtgaac ttataaataa tatttcaaaa  
5821 gaactttatg gcaacgaaaa atattctgaa gataatttgg ttttagcaga aaaattttat  
5881 aatcagtttg gagaaaatta ttattatcaa aagctaagcg aatttattcc cgataataaa  
5941 caaccaaagc acttgcataa aaaaatagta aaattaaatc taaaaaatct taccactact  
6001 aattgggata atctatttga aaaaggaata gatgaggaag gttgttttta taatattata  
6061 aaaaagatg aagatatagg atttgcaact ggattttcaa agcttattaa aatgcatggg  
6121 agttttagaag accaaaatat agttttttaa gaagatgatt atctaaaaata ttctgataat  
6181 tttcccttaa tagaaaatta tatcaaaggt attttttcta ctgatttggt agttttaatg  
6241 ggatattcgc ttagtgatag caatgtaaaa caaatcattt catgggtaaa ttctaaagct  
6301 agcaacataa aacctgtata tcttgtaaaa ataaataaaa aatttgataa attagagttt  
6361 gatttttata aaaataaaaa tatttatatt ttatatattg atgaaatata taaaaaaat  
6421 gattatgaac aatttttata tgatttcttt tttgaaaatg aaattaataa ttctattgac  
6481 aatgtattag atttgttttt aggtgattta gataaaaaat attttgattt agatatgtta

6541 agcaatcaag agataaatga taaagtggag gattttttgc aaagatacaa aaattgcaaa  
6601 tttataatac caaagctact agtacaggat ttaaagaatt attttcaact tagctatcag  
6661 gaaattaaca tggattcgtt agcaattnaa ataaacaata ataaattagc tgaanaatata  
6721 aaagatgaaa cttttaataa aattgcaaat ttaacaaata cttcgggtgta tactcgtttgt  
6781 aaaaaatag gggaattgaa aatgatnttt atatcagata tggattttatt gtattttaat  
6841 tatgactata tagaagataa aataaaaaaa cttacattaa aaaacttaag taacgaagag  
6901 gaactaagcc tagctttttg gttttatcaa aatgaacatt atatacaatc ttataatgct  
6961 ttaaaaagag tatctaaaaa tgctttttaa aataaagatt acactacttg gtttataagt  
7021 gaaaccaata gaaaaaactt tgtattttaga agtataactg aagaaaacga aattgaagaa  
7081 ataaaaactt attttaaaga aatggataaa atcaacataa gtgaaatgta tttaaaactt  
7141 ccagaaaaaa ataggaatga gatatcccat ataaaagatt ttgatttttt tataggagaa  
7201 aatataatta aaacttatgc tcttaaagaa gaaattatag aagaatataa tagacatatc  
7261 aaaggagggc taacttttaa taataatnttt tatttacttt gtaatatnttt ttccaggatt  
7321 gtcaatttag aagtaagact gaagattata tatgagttga aatctatata tagtaacatt  
7381 atcgaaggat tgttgattta ctattctatc aatggactaa aaacagaaaa tttttataaa  
7441 tacaccaaaag aaaatatttc tattgaagtt gagttgaatg tttttagttt tgctataaaa  
7501 ttttttaaaa gccaggaatt aaaaaagatc tttgataaat attttaagca aaattacata  
7561 ttgaaattaa ataacaataa agatatagat aaaattaata aaaatatttg taaaaatnttt  
7621 actacttcag gatttattgc aactaagtat agtcaattat tcgatagttt tttagtaatt  
7681 agttcttggg tagatttagc tcaagaaaat tttgaattaa tcatagatag ttttaatgaa  
7741 aaattggaag acaattttatt aggaattaac caatatgata gcatgaatta ttttttatct  
7801 aatcaatacc aaaaaataa aaatttagat ttttctaata taactaatat tattaaaaaa  
7861 tatataaatg cgtttttaag tggcaaatta ggtaataaca atacattagt tttacagtat  
7921 tcaaatatgt tttatgatgt ttttaaaata ctgattaata aaaaaataaa attagaagat  
7981 gattttaatc cgaaaatc agaatntta gctaatttaa aaaataaaaa cataaatgat  
8041 aagtattatt gtacaaggta ttttttggga ttattagggc atattgtttc taaaactata  
8101 cgaaaagaaa tagataaatt taatctagaa tgttataatc aggtcagaaa tgaaaataaa  
8161 gatttatata cactagaatt aggattnttg ttatatggtg ataaaaaat acctaaagaa  
8221 gagtataaga aagagttctt tgaatcaaa aaaagaacaa aagaagagta taagaaagag  
8281 ttctttgaaa tcaaaaaag aacaaaagaa gagtatgata aaaaaatc taaaatggaa  
8341 tttaatagtt cagatgaaac tatgcttatt tttagattta tagaaaaaa tgaaaaaaag  
8401 atatttggag aagataatga gtgatntaa atcaataaat gattttattg ggttgaattt  
8461 tataattcca tcttatcaa gaggttacag attggatgaa atacaaatta gagatttgtt  
8521 agaagatata tggaattttg tgttgatcca ataattgntta ttgcctttgt ttaacggctg  
8581 gaagacgatt attcattnttt aacattntta tgatgctatt atgcaaagat gaaaaaatc  
8641 aatgaagct gtttgtttat ggtgtaagaa tacaatnttt taatttaaaa aataaaaacaa  
8701 gatctatgca aagcaaatta taacataaat aaaccataa gcttgatact attttataat  
8761 agatttttga ttttagactt gtttttgttt atctgtgata aaatctttat aatattttca  
8821 aagttttcaa tatcttcatt tataaactta atatggcata tttataagca ttgataatat  
8881 ccaaattagg atattnttct tgaattnttt cacccaatca taaaagcaaa aaaccgaaaa  
8941 agctgagaaa ccattatttt atcaatacta ataattataa aattttatat gttttaatga  
9001 tttactaat tttaaagcct tacgaataaa ataaataaat ttaatgtgtt tagttttata  
9061 cttcttctt ttaaatagag aataaattag taattgaata taaaaagta gaatgtatntt  
9121 tttaaatatt tttataaaaa tcaattnttt tttggattat aatgataaat tatattatct  
9181 tatatatgga gtgttaaaaa ttaattnttt agaaaaaac cgctaccaa accgctcct  
9241 gagttnttta aaaactntaa aaaacacttt gaaaagcaat ggtgcctgag gtcggactcg  
9301 aaccgacaca aggttgccct taccagattt tgagtctggc gcgtctacca gtttcaccac  
9361 tcaggctntt gtaaaattgt aattatatcc attttagact aaaaaagact ttaaaaacat  
9421 atgaaatatt ttaaaaaatt ttttttagg gaattntata atgaaaaata tcaaaatntt  
9481 ttaaggataa aatattatta aattnttatt gatgtcgata ttgtaaaaat aaaattggaa  
9541 caattattgc ttgtgtttac aaagcaatgt ttgaaaagat tttttaatc aaaactcaa  
9601 ggatgaatat gagaattaca aataagctca actttacaaa ttctataagc acttctatgg  
9661 gtgctcaaag ctcttatat cagatttcac aacaactctc atcggggatt aagatccaaa  
9721 attcttatga ggatgcaagt gtttacatag acaataactc cttgaaat gaactcaaaa

9781 ctttagagca agttaaacia gctacaaatt cggctaaaga aatgacgcaa aatagcatga  
9841 aagctttaca agatatgggtt aagcttcttg aggattttta agtaaagggtt actcaagcag  
9901 caagcgatag taattctcaa acttcaagag aggctatagc taaagaatta gagcgcatta  
9961 aagaaggat agttcagcct gcaaatacta gtgttaatgg acaatatctt tttgctgggtt  
10021 cacaagtggc caataagcct tttgattcta gtggaaatta ttatggagat aaaaataata  
10081 tcaatgtagt aaccgggtgcg ggtactgaaa gtccttataa tatccctgga tgggatttat  
10141 tttttaaagc cgatggagat tataaaaaac aaataagtac caatgtaagc tttactgata  
10201 atcgttggaa tcttacagaa aatcctgata aaacagaata tctcacaagt agttctaaat  
10261 ggcaacaact tatcgggtcaa ggttatgtaa aagataatgg ttttagatgtt gataaagatt  
10321 ttgaatacag tgatactaaa ttaaattttc ctctactac actttatgtt caaggcacia  
10381 gaccagatgg gacaagtttt aaaagtgtctg tgcttgtaaa tcctgaagat accttagaag  
10441 atgtgatgga aaatatcgga actctatatg gcaataccc aaacaataaa gttgttgaaa  
10501 taagtatgaa tgatagcggg caaattcaaa tcacagattt aaaacaagga aataataaac  
10561 tcgattttca cgctgtggct ttcacaccac aggctgatga ccgaagtgag cttacaggta  
10621 ttattgaagc tgcagaagct gaaggcatca caatggaaga ggttacaaat aggggtgatgg  
10681 ctgaagctac tgcagctcct agcaatggag atattacaaa tttaaacagc cctgtgactg  
10741 taacaattaa tggagaggat tttgagattg atttaaaaca aactgatttt attaaaagca  
10801 aatgacaga tacagatgga aatgcagcca atggagctga ttatgataat gtttattttg  
10861 aaaaaaatgg caatacagtt tatggtaatg tttctcaagt tatcaaagga agtaatgctt  
10921 atgctactga atcaacaaa cttagtgaag ttatggcagg agatagttta aatggcacga  
10981 ctttaaattt aaaagtcaat tctaaagggtg gaaatactta tgatgtaagt ataaatttac  
11041 aaaattcaac cgtaagcttc tccgatccta atgatcctac gcaaaccata agctttccta  
11101 tcatgcatac tgatcctgca acaggaaata gtgggggttat aacaggagca aatgacatta  
11161 cttatgggca aatcaatgat attataggaa tgtttgctgc agataaaatt cctaccacia  
11221 gcatcaatcc aaccaatgga aaaatagatg cagtagatta tcaaaatag caacaactca  
11281 tgaagattc taatgcaacc gtagatgtaa gtatggacta taaaggctgc ataagtgtaa  
11341 ccgataagct tcatcagga accaatatag aaatttctct tagtgactcc caaagtgggc  
11401 agtttccatt acctcctttt accacaactt ctaatgtgga aatgggtccg aactttaatt  
11461 ttagcgcgaa taattcttta actatagatg aaccaaagt agatattatc aaagatttag  
11521 atttgatgat agatgctggt ttaagtggaa atatgagggc taattctgaa agtgaagatc  
11581 caagaaatac aggaatgcaa ggggcttttag aaaggcttga tcatttagca gatcatgtta  
11641 gcaagcttaa tacaacaatg ggggcgtatt acaatactat tgatggagtt aatacacgca  
11701 caactttttt aagtgttaat gtccaaagta taaaatcaaa tgtgatcgac gttgattatg  
11761 gcgaggcgat gatgaattta atgcaaacac agcttgccta tcaagcttcc taaaagcaa  
11821 gcacgacgat agcgcaactt agcttattaa attatatgta aaaaaactat gctataatgg  
11881 cttcttaaaa aattattttc aaggaaaaat catcaaaaaa gaagccatct ttataagttc  
11941 tacttttggt atcttttatt tatgtctttg tatgctagct ccagatatgg ggggtgtggat  
12001 ttataaggcg aatttgtttt tatttggaga atttgcatat tattatcctt ttttcttggt  
12061 tattttaaat tatgtttatt ataaaagaaa ttacaaatta gctaatttta caagaagaga  
12121 gctttttggt ataggatttg cttttttctc aagtttactt ttatttgcag ttttttatcc  
12181 taattctggg tatatactag agctttctta tgcgattttt tctattatct tgggacatac  
12241 tgggagcgga atttttgctc ttgtgctcct atttttttct tttattttat tatttccaaa  
12301 aactacaaaa gagcttttta agatcgagct cgattttaat attttactta gggtagaaaa  
12361 tgcattaaaa gcgttattga tgagggtttt tggcggggaa aatgaaaaag atgatttaag  
12421 caagatagaa cctaaggcgc ctggtgttac cttagaaaag aatacagctc ccattcagga  
12481 aaaaattcaa gatgagaatg aaaattttaa cttaaatcaa acagaacagc ttgttaaata  
12541 taataatata aatgcaagta aaaattctat aatcaccgca aaagagaatt ttgaaaaact  
12601 taaaaaccaa attttagatg aaaaagtaga gatagataaa gagagtatta aagaagctaa  
12661 aagtttcatt tacgaaaact cgcaacaagt aagaaatttt gtccaaaaag cgagcagaat  
12721 gagtataaaa cttgatgaag attttaattt tatttcagaa gaagaggtag atatgatccc  
12781 ggaacgattt ttaaaccta aaaagcttga cgatattaag caaatcgata caaataataa  
12841 aaatttagat gagccaagct ataaaagaaa aaatattgaa atttctgtac ctaaacaaga  
12901 aataaagcca aaaattttta ctaaagaatt ggaacttaga gaaaatttaa tgaaagaggc  
12961 aaaattagag caagaataca aagcttatca aatgaaatt ttagaaaata aagttcaaga

13021 agaaattaaa gaattagaaa aaaaagatag cttagaactt gatttaaacc atattataca  
13081 aggaagtaag tataatthttg gcacaccttt acaagaagta tcaagcgcaa aagaagaagt  
13141 aaaaacacaa atgcaccaa ttccttctat cttagaaaag acaaatgagg ttgaaattat  
13201 agatthttgat gaaaatgaaa ttgaaatcaa aaaaatggaa agtataaata aaagcttcca  
13261 tgatthttata cctatagttg aagaattaga acatccttat atagaaccaa ctcctattgt  
13321 aaaaattgaa gagataaagc ctttgataa tcaataaat aaacaaatcc caattcaaga  
13381 gaaaaatgaa atcatagagc aaggcaatag cttcatcaag gaacaaattht cacaagaacc  
13441 aagccaagaa atcactagac aaaaagcgat tttagctaaa gaaatcgagc tgaataaagc  
13501 tttacttaga gaaatagagc aggggtgaaat agaaaaaccc aaagatthttg agcttccgcc  
13561 gcttgagthtt ttgacaaatc ctagccataa caagcaagag ataacgaaa gcgagattga  
13621 taaaaaaatt tataatctac ttgaaaaatt gcgtcgtthtt aaaatagggg gtgatgttat  
13681 aagtacctat atagggcctg ttgtaactac tthttgaattht cgtccaagtg cagatgtaaa  
13741 agtaagtcgt atthttaaatt tacaagatga tthtaacctg gctthtaattg caaaatcaat  
13801 ccgtatccaa gcacctattht ctggaaaaga tgtggtaggt atagaagtgc caaacgatga  
13861 aattcaaact atthttttga gagaaatthtt agaaagcgaa gctthttaaaa acgcaaaaag  
13921 tcctthtaact atagctthttg gtaaagatat agtaggaaat gctthttgtaa ctgatcttaa  
13981 gaaactthcca catttactca ttgcaggaac cacaggaagt ggaaagagcg tgggtataaa  
14041 ttctatgctt ttaagccttht tataatcgcaa ctctcaaaaa actthtacgct taatgatgat  
14101 agatccaaaa atgcttgaat ttagtatttha taatgacatc cctcatcttht taactccggt  
14161 aattaccgat ctaaaaaaag cagtcaatgc tctthtcaaat atggttgcag agatggaaag  
14221 acgctatcgt ttaatggctg aagcaaaaac taaaaatata gaaaattata atgaaaagat  
14281 gaaagaacta ggagaagaag agctthccttht tattgtttgtg attatcgatg agcttgctga  
14341 tttgatgatg actgcaggca aggatgtgga atthttatata ggccgtthttg cgcaaatggc  
14401 aagagcaagt ggaattcatt tgattgtcgc tacacaacgc ccatcagtgg atgttgtaac  
14461 agggcttatc aaggctaatt tgccaagtag aatthcttac aaagtagggc aaaaaattga  
14521 ttctaaagtt atcttagatg ctatgggagc tgaaagctta ctaggtagag gggattgttht  
14581 atthtactcct ccaggaacaa gctccatcgt tcgtthtcat gctccattht caagtgaatt  
14641 tgagatagaa aaaatcgtag actthttttaa agatcaacaa agcgtagaat acgatgaaag  
14701 tthtttataaa gatcaacaaa gtatgggtgt aacaagtagc gaaagtatga ataatgggtga  
14761 gtatgatgag cthttatgaag atgccaaacg cgttatacta agcgatggaa aaacaagtat  
14821 ttcttatttha caaagaaagc tcaatatcgg atacaaccgc gcagcaata tcatcgatca  
14881 gcttacagaa agcggagtgt tgagcgaacc aaactctaaa ggacaaagag aaatthttata  
14941 aatctthttggt aatthttaaag atthaaagaat gatttgaaga tcaagccctt agaaaaaggg  
15001 cttgtaaaat tthttttatc tctgagattht aatthctgtaa ttaatthtact ataagaattg  
15061 taatctthttc tthtttagata agctaaaagt cthttthcttht gacctacgag tthttaaaagt  
15121 cctaactcttg aagaaaaatc tthttttgtag atthtttfaat gttctgtaag ttctgcaatt  
15181 cttgcactta aaagtgtac ttgcacttht gtcgagccag tatcgcccgc tthttctagcg  
15241 aatthtcgcaa caatthctgc tthttttagcc gaatccaaag ccatgataga cctcctgatt  
15301 ggtgattthta aaagctaaaa ttatatcaaa taaaacaaaa aataagctga aatthtatatt  
15361 tttactthtaa tcatcattht ttaagccatt ttctaagatt tthtttattat aatthaaaact  
15421 atthttttatt aaataaaaag agaaatthcgt gctatthtacc aaagctagcg aatatgcttht  
15481 actthctthttg atthttatcgc ctcataaaga aaatcctcaa gatgttgatt cthtttagcatt  
15541 agagcttaat atthcctaaaa gthtttttagc gaaaatthtta caaactctag ctaaagacaa  
15601 tttattataaa tctthtcaag gtgctaaagg tggthttgtc cttatttaaag agccaagtca  
15661 atacagcata aaagaaattg tcaatagtgc agaaaaaaa gaagtaagtg tthtttgagtg  
15721 tagcgggtgga gtatgcccta ataacaaaga agaaaattgt actcttatgc caatgcttht  
15781 aaatthtacia aacaaagtag atgaatthtt agactccatt accctagcgg atattatgaa  
15841 ccataatggc aaaaaataaa ttagtcgatc ttgtthttcc tthttttagga cthtttaattg  
15901 gtcctgtatt aagggtctaaa agtcttacta tagtcggatt tatagtatgt atthttagcta  
15961 ttattatcgt tcctthtacc agtcctattht tggactthtt cttagctthta agcattgctt  
16021 tatcagtgc tttatthttta atthctattht atatcccaa gccaacggat ttaaccactt  
16081 ttccaactct tatcctgatt atcacgctat ttagacttht tthtaaatata gcaaccacia  
16141 gaatgattct aagcgaagga caaatggcc ctgcggcggt gagtgatc atcgcagcct  
16201 ttggagaatt tgtggtgggt ggaaataggt tcattgggggt gattgtattht tgtatthttg

16261 ttttgatcaa ctttatggtt gtaaccaaag gtagtacaag ggtttctgaa gttcaggcaa  
16321 gatttaccct tgatgcgatg ccaggaaagc aaatggctat cgatgcagat ttaaattcgg  
16381 ggcttatcga tgagcaaact gcaagagcaa ggcgtcaaga aattatcgct gaagccaatt  
16441 tctatggcgc gatggatggt tcttctaact ttatcaaagg ggacgcggta gcaggtatta  
16501 ttataacat tataaacatt ataggtggtt ttttaatagg cgcttttcaa cacgatatgg  
16561 ccttgtccga tgcagcttct acttatacta tacttactat aggtgatggt cttgtatcgc  
16621 aaattccagg acttatcact tctactgcaa cagctattat catcaccgc gcaagcaaag  
16681 atgaagaaaa ttttgctgaa gggacattga cacagctttt aagcgagtat cgaacacttt  
16741 tgattgtggg ttttgttcct tttatTTTTT ctcttgttcc aggtttgcca cacttatcat  
16801 taggttttat ggctttggta ttcttagcac ttggttatct aaccaaacag gtaaaagagg  
16861 gtaaaatcga agtcaatgca cctaaaaaag caaaagcaag cgcagccaat gctgcaagtg  
16921 gagcgggtgg ggctggtgga gttgctgctc ctgctaaaaa aagcgaagaa gaaattctaa  
16981 aagaagaaga gcacaaaata aacgatatac ttaaggttga aatttttagag cttgagctag  
17041 gttatggctt aataaaactt gctgaaagcg aattaactga aagaattcgc tctatgagaa  
17101 gaagtattgc tgagagctta ggctttttaa tgccaaaaat cagaattcga gataatttac  
17161 gacttaagcc taatgaatat agctttaaagt taaaggggtg atccatagca agtgccgaaa  
17221 tttatcctga taagtatttg gctatggata gtggctttat cacagaagag attgaaggga  
17281 ttgctacaaa agaacctgct ttttaattctg atgcactttg gatagattca aatttaaaag  
17341 atgaagcaac tttaaatggc tatatagtta tagatccagc aagtgtgatc tcaacgcata  
17401 tgagcgagct tatcaaagca catgcaagcg agcttcttac acgccaagaa gtacaaaatc  
17461 ttcttgataa ggtaaaaaat gattatccaa tcatagtaga aggtgcttta ggtgtagctc  
17521 ctgtaagtct tatccaaaaa attcttaaag acttgctcaa acacaatata cctattaaag  
17581 atatgctgac tatttttagaa tctataagcg atattgctga agtaagcaaa agctttgata  
17641 tgattataga acatgtaaga gcgtcttttag ctagaatgat tactaatatg tatcttgatg  
17701 ataaaggaaa tttggatatt ttcatTTTtag actctgctag ctctgcggtt ttaatggaaa  
17761 atgtgcaatt tagagacggt agctatcacc tacctttaag tgtagcacia acaggaactt  
17821 tagtagatac cttaaagagct gaagttgccc cagtagcaaa tgggcgtatc aagcctttta  
17881 tactttgctg tgaaccgcaa cttagaaaat ttatcgctga tttttgttat aattttaata  
17941 tcaatatagt tgtacttagt tttgcagaaa tagcagaaaa tacaaatttt aataccgaag  
18001 gtattattag gatagaactt taaggaaatc aatgaaaatt tatcatcttt cacataccga  
18061 tcttgatggc tatgcctgtc aatatatagt caatttttat tttaaaaatg taaattttta  
18121 taattctaatt tatggtaaag aatcaatga aaatttcaac gcgatttttag cagatataga  
18181 aaaagataat agctttgggc aggctattat tttaatcact gatttgaatt taaatttaaa  
18241 tcagtgtgaa gaatttgata aaatttgcaa agaaaaaat atcaaaatct ttttattaga  
18301 tcacatcaa agcggtgagg agtgtgctca aaaatatgca tggatctac tagataataa  
18361 aagatgtgcg actaaaatta cttatgattt tttctctaaa atttgtacgc ctgatttaga  
18421 acttttaaat ttcgccaag ttgtaaagc tgttgatatt tggtaagtg aggatgcaaa  
18481 ttttgaactt ggaaaagttt ttttgggttt gattgccaat gcaaaagaaa tcaatcgcgt  
18541 gatgttttaa gaagctcaag ttttttatat gtttttcttg cttgaaagag cgagaaaatt  
18601 tataaaccaa cctaattcgc atattttgct agataatgct atccatttta ttaaaaaaga  
18661 ctttttgct aaaaattgcg acgacactct ttctaactc atctcttatt ttgtagtaga  
18721 aaagcttagc gagttaaaag aagaattcag tatagagtat gaaggtcata agggattct  
18781 tacttcaaat ataggcaata cttctgtcat aggtaatgaa tttttagtta aaaatcccga  
18841 ctatgatttt ttcacgatg taagctctag aaaaacctta agttttctg caaatggtaa  
18901 ggttgatgta agcttgatgg ctaaaaagct agtaggtgga ggagggcata aaaatgctag  
18961 cggtgggctt tttgaggctt ataaagatgg agcaaattat aactatatta aagctcaaat  
19021 cgttgatatt ataaaaagta aagaacttaa aaaaggaaat tcagatgcca caaacacaca  
19081 ataaaaattt aaaaaatgaa ttagaagatc taagatatga attaagcata gttttagaag  
19141 ctatgctttt atatgcaggt gttaaaagag agaagctaga aagtgtata gaagcttata  
19201 tagacaatat agatagtgtc ttagaaaatt caaataaaga aggagttgat gaagttttag  
19261 aagtgggtgga attttttaaaa aatcaacacc cagagctttt tcaatgaaaa aaatacttcc  
19321 gatacttata ggcttttggt ctctatcgtt tgctaatggt tatgaaaaac ttaatgattt  
19381 tgcataatgaa aaaaagccca ataaagattt taaaattcaa gaagtgaaat tagtgcaatt  
19441 ttcacaaaaa aataaaaatt gtcttgatct tttgatagaa gcagggcagg tgagaattct

19501 taaaagctat aatgagtgtc aaaaattaag caaggatgct gactttcaaa aatttcttaa  
19561 tgaggatntt ttaacattgt ataaaaaca tggatatttt atcaatgaaa atttacaaga  
19621 tcttaaaaag gctatgcaag atgttatgat atattataaa ttgcgntttg cttttagtaa  
19681 aatatacaa gatatgagta aaaataaaaa tttaaagtatt ttaaataatag acgaaaaaga  
19741 agggggcacg cttctttata aatcaacaa tcaagcttgt gtaggtatag agcttataag  
19801 acataattct agaatggcta tgaaagtcta tggaaatggaa aatttagata aagaatgtaa  
19861 attatttata caagctccat cttttaagaa tatttctttt acaaaaaatg attttaaag  
19921 gtattattta gaataaaaga aagtccttaa ttttaaaagt attttttaa ataaaagcac  
19981 caaagcagaa ggttcttttt tgccaagagt tttgaaaaca caattatcaa gatctttttt  
20041 ttcttgaacg cttaaatttt tcattaaaaa caaccttaa aatattgag agctaattat  
20101 agctaaacaa ctttattttt gtattaaaa atttaattta aatttcaatg cattatctat  
20161 catagacaat gcattgnttt gttttatggc atattgctaa gttttttaac gatgtcttct  
20221 aaagcttgca ttgaaactgat ggcgctagga ttgatttgat atttgccatt tacaacaaaa  
20281 gcaggagtcc cataagctct agctatatca tttgctcttt taaattcggt taaaatttct  
20341 ttggctttag gagtgcctaa aaaattcaat acttcatttt tatcaacatt catagccttt  
20401 aagcctatat cataaaattc atccgagctt gaaaaattgt cctgcttgtt tataaaataa  
20461 actacaaaat aaacatcggc aagtttgtgt gataaactat cactataact agcatctttg  
20521 ccattttggt catctttaa ctgagcaaag gcaaagagt cattaagttc gtttgcatat  
20581 tctccattca taaggcttac aggatagagt taaaatgca aatttggaaa agcctctcta  
20641 agtttttcta aggtgccaaa tttatggtga ttgtaacaat gtatgcactt ataggaaaa  
20701 gcttcacaaa cagaattttt agaatcaggc aaggtttctg atagggtgat aaaatcatct  
20761 gccatcgcaa aagtgcaaac aagactcaag cttgtcaaaa tttttgtcat ttttttaaac  
20821 ataattgctt atccttaatt tgatataaaa agtaattcta tttaaaagg ataaacaagt  
20881 aaaaatttaa tctttaaaaa taagtatttt ttaaccaat atcttaagt ttaaaactaa  
20941 tcctatggta atgatggtaa aaataatttt tctttgacta aaaatatagc ttacaacat  
21001 tataaaaagt aaaataaaag agcataaaaa tgctataaaa cagcaagtag ccatattcat  
21061 aaatttcaaa ctagggatta gataccaacc attgctataa agtccatttt ttcctacaaa  
21121 aaattcttga aaagcattta aataagcggc ctttggaaac atgggaaaat ccattccgca  
21181 ttgtcctatg ggtttaaacc aagaaggaaa ccattcatgt aaaggtagat taaaagggta  
21241 gagcggaaag tgcgacatc cattaacacc gctgaaaggg ttttccgtgc taatagcttc  
21301 atgaatgcga tttaaattca acgaatgttc taatccaagc caaattccat aaaaagctaa  
21361 agtataggca aggattttta taatggtatt tttaggatt atcagtcaa tgatgcctcc  
21421 taaagctata attaacatat ctaaccttat ataaacacat tgttcacaaag gtctcatata  
21481 aagatattct tgaataaaaa aatgcgctat taaaacaagg cttatcatta taatactcat  
21541 aataaaccaa ggattacgca tatcttgcca tttagaaaa caatcaatcc aatataaatt  
21601 tttcacctta tttttactc cttaataaat acttacagac aagcaatcat tataaaagct  
21661 taataataaa tacattctta aaaaaattta aaatttagaa aatgntttga tatgtaaatt  
21721 taaaagaata gggatnttct ttatatttta taaattatca tttattgtat tattttgata  
21781 aaaatatata ataatatgtc aatgccatat tatcttgact atttgaaaa agataaatta  
21841 tagntttcaa attacaaaat aaaataatca tttttataca ttaaatttta tggataagtt  
21901 attaaaatac aaaaagtaaa tatgcttata atgcctataa tatagcttat acattggcat  
21961 aagactntt atggattagag tataaatata aaagnttgaa aattatagtt ttcaatacaa  
22021 aataattaat tttatgtatt tttaccttt atcatacaat tatacaata ctattaagaa  
22081 ttatttaata tattttatat aaggaattta aatttatttt ttaaagttaa aatgagctag  
22141 aaaagctntt ttttactaag ttgatactaa aataccttt ttagttaaaa ttgattaaaa  
22201 acaaaaatta taagatttta ggaaaagttt ttatgaaata tcctttagat tgtgaagaaa  
22261 attttgaaaa gtctttttta ttttggcttg caaaatatgt caaatttaa ctcaactctc  
22321 tttctaacaa agaacttaaa aatccaaaag ccctagcaga ggttaatttt gcacttacia  
22381 aggggtttaa aatataagaa gagcttgatg ctttggctaa aaaagcaaga aatgcgggct  
22441 taaatggtgt taatacttat tttaatccct taaaaaaagt ctttgaatat cttaattttt  
22501 ataaattaca ctcttaaaa caaatagatg aagagcttat agtagaagtt ttagcaagca  
22561 ttaccggagc tttatcagat gcgagtaaaa aaaattaccg cattgcagtg attaatnttt  
22621 ttgactnttt agataagcaa aatgaagagg atgaaaaggc gcatattntt gatattgtac  
22681 ttaaaaattg gggaggtatt acaggaaata aaggggcaaa actgcctgaa tttatgaacg

22741 aagatgagtt aaaaaaattc cttgaagcca tagaaaattc agatttttaa aacaatacca  
22801 tacgcaacaa gctcattata aaaatcatta tttttacagg aatccgcgta agtgaggcta  
22861 tcaatatcaa actcaaggat attagcgaag aaaacgaact ttacattata agaattcgcg  
22921 ccaaaggaaa taataaccgc gttgtgatga taaaaaaaga attgatcgag catttattaa  
22981 aggatgtaag ggттаattat ttaagtgaag atggcttact ttttgtcaat cgcaatggaa  
23041 aagctttaac gcaagcttat gtaagtcgta ttgtagagca aattttatftt cgcgcaggaa  
23101 ttcgcaagca aaaaaacggc gctcatatgc ttcgccatac ttttgctacc ctactctata  
23161 aaaaaacaaa agattttggtt ttgggtgcaag aagctttagg gcatgcaagt ttaaatactt  
23221 caagaattta tacacatttt gacaatgata aattaaagct tgcggcacia gtagcaaagg  
23281 aattaagtga gcgctgaaac aaattttgcc atttttggta aatattttta ttatgactta  
23341 aaatttgttc ttaaagctta taacaaaaaa caaagtaaaa aatactttta atttgtgcaa  
23401 aacataaag ataaatatta ttttttaact cttgtggatt atgaatttta taataactta  
23461 caagataaaa acttcactag caaagaggct tatttgagct tttatgctta taaaaaaaga  
23521 aaaaaattta gcgcatgag cattgatgaa gaaaatttta tgcctatftt taaaaatcat  
23581 tttagatttta aaaactatga aaaaaacttt ttgcaagtaa aatctgctat agcaaaagga  
23641 cgaagctatc aggtcaatct cacccaaagt tttcattttg atagcttgct tgatggattt  
23701 tccttgttta atcttttatc caaaagacia gatactgaa ttaaagcgta tatcaaagac  
23761 gaaggacgcg aaattctttc cttttctcct gaattatttt ttaaaacca taaaagaaaa  
23821 ataatcacc agcccatgaa aggcaccagt gcgagatcta aggatttaaa tcaagataag  
23881 aaaaaacaaac ttttttgca aaaagatgftt aaaaattta gcgaaaatgt aatgatagtc  
23941 gatcttttaa gaaacgatct ttcaaaactt atcgttaaaa atagcatgaa aacaaagctt  
24001 tttaaaattc aaagctacc tactttgcat caaatgactt ccattataaa aggcaagctt  
24061 aaaaaagata ttgattatftt tcaaattttc aaagctttat ttccctgagg ttcgatcaca  
24121 ggagctccta aacttgaaac cataaaactt atagaagaac ttgaagcaag aaaacgagg  
24181 atttattgcg gtgctatagg ttgtatccat aaaaaataaa gcaaatttag cgtcgtctata  
24241 cgactcttg agaaaaaaca agattatcaa tatagcgtgg gaagtggctt ggtgtgggat  
24301 tctaagcttg aggaagaatt taaagaattg gagttaaaaa ctcaattttt aatgcctaag  
24361 gacttttatc tttttgaaac tatgtattat aaaaaaggta aaattttatt ttttaagaa  
24421 catttaciaa gaatttttaa ttctgcttta aaattaaatt ttaacacaga aaaactcgtt  
24481 aaagattttc aagagggtgtt aagctacaaa tccaatttaa aagaatttaa aaatttcaat  
24541 atccaagctt taaatgaaaa actttttcat aaaaatcata gcttttttta tccaagcacc  
24601 attaaaagtc atcacaaaca ggctatfttt aaacttatct taaaaaaga tggcagttat  
24661 accatcttgg aaaatcatat caaaacaagt gataataaca tcttgctftt aagtaataaa  
24721 tccttaaatt cacaaagtga ttctttatac cataagagtt ctttaaggca aatttatgat  
24781 gaaaaagctt ttttatggaa agaaaatcaa tgctttgata tagctftttt taatgaaaa  
24841 aatgaattat gcgaaggttc aagaagtaat atcatcatta aaaaagataa agtcttttac  
24901 accctactc tgcaaagtgg gctftttaat ggaatttata ggcaattftt gcttgattta  
24961 ggacttataa aagaaaaaag actfttttaa gaggatttgt taaatgcaga tgagatttat  
25021 tgtatcaatt cggtttagagg attgcaaaaa gtgagtctaa aatgaaaaaa atfttactca  
25081 tagataatta cgattctttc agctatacta tagftfttta tcttaaagaa ttgggttatc  
25141 aatgcaaaat tataaaaaat gatgaattta aaaaagccaa agatttaact cgctttgatt  
25201 tttctcacct tatcatctcc cccggtcaa attcccctgc tgaatcaaaa ttaagttta  
25261 aagcaattca atacftttaa aaagataaaa aaatactagg aatttgfttg ggacatcagt  
25321 gcataggcga ggtftttggc ggaaaaatta ctccgatgcc ctaccctatg caaggtaaaa  
25381 tttcaagatt gcatcttaag aaaaatgcta aaaaaagcct actfttttaa ggtattgaaa  
25441 ataaaagtca aatttgfttg tatcattctt tgcatattag caaaatgcca aaaagttgtg  
25501 aaattttagc cttaaagat gaaaatatca tcatggcaat caagcataaa aaatatgaga  
25561 tttatggggg gcaatttcat cctgaagcaa ttttaagcca aaatggcaaa aaattactta  
25621 aaaattttat gaaaattta cttttcttag catttaaat cacgcttaag ataatcaagg  
25681 caaaggcaaa aagatctaaa aagctgtatc ttgttcctaa aaataaaaag ctcataaaag  
25741 cagctgctac aggctcgata catgctatca tgcttgctct taaagctcct atgtattcaa  
25801 cccftttaag atatagacia aaagccccta tagttcctat aaatattatg cctgcttgag  
25861 ctaaatacaa attaagagca aaatcataat gcactaagcc tctfttaaat tcaagtatcc  
25921 caaaaagtat aaaaagca attaaactag accaacctat aacaaagaaa attccatatt



25981 ttgcaatgat ttttcttgca cctaaagaat aaaaagcaac cccaaaagct cctaaaatgg  
26041 cccaaaaaat tccccataaa ttttaggttta aattgcttat atctccacca cttgcaagca  
26101 aaaatagagc tagaattata aaaattaaag ccatactttc aaaaatttta ggcatttttt  
26161 tatcttttat acatacataa atcatgataa gcaaaggagc acagtattgt atcatggtag  
26221 cagtacctgc atcgggataa aaaatagctt taaaatatcc atattgagtc atcaataaac  
26281 caaagaaagc aaaaattaaa aaggataaaa gctcatcttt tttaaattga aatattttta  
26341 ttttctttaa gctatacaaa ataagcacta tacctgtgca aaacaatcta taaaaactta  
26401 cccaatctac cccataatta tttttaaata aatactcagc taaaactccg cttatagccc  
26461 aaaaaattcc acccagtaaa actaaaaaaa cacccatgat attgccttga aaaataaaat  
26521 atgtatgatt ttttaatttt aaaataatac aataaaaata ccaaactga aaaaatttaa  
26581 actctaaata aattgtaaat ttcaaaatga aaagcccaag taataaactt ttacaaagtt  
26641 taaaaaggta taattaagct ttgaaattta aaataaggtt tattataatg acttatttag  
26701 agatacaagg ctcccaaaaa cttcaagggtg aagttacaat aagtgggtgca aaaaatgccg  
26761 ctttgcccct aattgcttct agtatacttg caaaaaatga gggttaaaata aataatgttc  
26821 ctaatgttgc agatatcaaa acactcattt ctttgcttga aaatttaggc gcaaaaactg  
26881 attttaaaga aaatacagca tatttaaata caacaacact tgataaaacc gtggctaaat  
26941 atgatatcgt gcgcaaaatg cgtgcttcta tccttacttt agggccttta cttgctcggt  
27001 ttaatcattg tgaagtttca ttgcctggag gatgtgcat aggacaaaga cctatcgatt  
27061 tgcacctaa gcttttagaa aaaatgggcg caaatataga aataaaaaca ggttatgtcg  
27121 tagcaagcgg gaatttaaaa ggggctcaaa ttctttttga taaaactact gttacaggca  
27181 gcgagaatat cattatggca gcagcttttag ctaagggaaa aactaagctt gtaaatgttg  
27241 ctaaagagcc tgaagttgta cagctttgcg aagttttagc taatgctgga cttgatataa  
27301 aaggtatagg tacagatgag cttgaaattt atggtacaga taaagaactt ttggatttta  
27361 aagaatttag cgtaattcct gataggatcg aagcggggac ttatttgtgt gcaggagcta  
27421 ttacaaattc taaaatcaca cttaaaaaag taaatgctga acatttagga gcggttttgg  
27481 caaaactcca tcaaatgggt tttgaaactt cagtagataa tgataaatatc actttatttc  
27541 ctgcaaaaga aatcaaagct acagagatca tgactagcga atatcctggt tttccaaccg  
27601 atatgcaagc gcaatttatg gcttttagcct taatggcaaa ggggtacaagc attatcgatg  
27661 aaagactttt tgaaaatcgc tttatgcatg taagcgagct ttttaagaatg ggtgcggata  
27721 ttaaattaaa tgggcatatt gctactatag tgggcggtaa agaattaaat gctgcagatg  
27781 ttatggccac ggatttgcgt gcttcttcgg ctttgatttt agcagcactt gtagctaagg  
27841 gtacaagcag gatacataga atttatcatc ttgatcgtgg ttatgaaaaa ttagaagaaa  
27901 aatttaaagc cttaggtgct aaaatcacia ggcttgaaga atgaaaaata tttttcaaac  
27961 ttttagcgc atacaagatc aaattacagc tcttaatgaa tttgaattaa tcagtcttga  
28021 agaagctaaa gatagggttt tggctaaaga tctctatgct gtaaaaaatt tacctagcct  
28081 tgataatgcc gcgcttgatg gctatgcttt taattatgcg gatataaatc aagctttaga  
28141 tataaaaggc acgatttttag ctggagataa aaacacttat gagatctata aaaatgagtg  
28201 ttttaagatc atgacaggtg caaaaatgcc taaaaatgcc aataccattt taatgataga  
28261 agatgaacac atagaagaag gcaaacttat catcaaaaag ccacctaagc aatacaacgc  
28321 ttatcgttat aagggcgaag aattaaaaaa agatgagcct ttgttaaaaa aaggcacaag  
28381 gcttaatgct agacatatcg ccctgctctc ctctcaaggg ctttataaaa tagaagttgt  
28441 aagaaaaatt cgtgtcggaa ttttttcaag cggagatgag ttaaaagaac cttggcaaga  
28501 ttgtgatgag gaaaatattt ataatgccaa tgctttgcct ttgcttgctt tatttgaaga  
28561 ttgtgctaca agttatcttg gtattattaa agatgatttt aatacaacta aaaaagcttt  
28621 agaaaatgct aattttgatc ttttaatcac ttcaggcggg gcgagtgtag gagaagctga  
28681 ttttatggaa aaggctttta atgaattagg ctttgctcca ctttttaagg gtttaaaagc  
28741 acgccctgca agaccaacta agctttatca aaaagataaa acttttagtat tgattttacc  
28801 aggaaatcct atggcggctt atctttctgc ttttatcttt gctagaaaaa ttatcgctct  
28861 actttatgga aatttagaaa attctttaca aattcaagct atcatgggga gtgatttaaa  
28921 agtaaaaagt ggaagaaata atcttatctt aggaaattta gaaaagggtta ttttttatcc  
28981 ttttaatgat aataaatttg gttcaggaat gatactgcct ctgattcaaa gtgaattttt  
29041 actcatcagc gaagaagaaa aagcagaatt tcaaaaagat gagaaaatct tgctttttta  
29101 actttaaata taatttttta taagtttatt aatagcattc tttttaaaaa tttgatttat  
29161 cttagaagac gttttaaaca aatgaaaaca aaaatatata agaataaatt tgcaatatga

29221 agtatggagc gggaaacgag attcgaactc gcgaccccaa ccttggcaag gttgtgctct  
29281 acccctgagc tattcccgca atttgaagtc aaattataat aaattttaat aatttttgtc  
29341 aataaatttt tacgttttat ttataaaaat ttatagattt tcgctttttt ctaaaacttc  
29401 aaaatactca ctttctagtt tttctaattc tttttgtgct tgctctagct ctttataaag  
29461 agtattttatg cctattttctt gatatacact tggatttgaa agatcatcgt ttaatttgga  
29521 aatttgtttt tcgagcattt cgattttttc gggatgattt tttaaaattt cattttcttt  
29581 atagcttagc tttttactat tttttctttt ttgtgtgtga gtttgctctt gttgtaaatt  
29641 aaggcttgaa atataatcat caaattcttg cattttcttt tcattttcaa ggtattcagt  
29701 ataaagggtg tgtaaaatat tgatcttagc accactttca aaagcataaa gtttggtagc  
29761 gattttatct acaaaatc tcatcatgaga cactagcaaa atggctcctt caaagctaag  
29821 taaatattct tctaaaatat taatagtcgc tatatcaaga tcattttagt gctcatctag  
29881 gattaaaaca tcatattctt ctgtaaaaag caaagctaag gcgacgcgat tttttctcc  
29941 accacttaaa acagaaacgc ttttatctaa aaattcttta ggaaataaga aattttttaa  
30001 atatcataa acatgcatat tttttccacg cacttcaacc ctatcacctc cattaggaca  
30061 gaaaatttca agcaaggttt tatctgaatt tacaagactt ctagcttgat caaaatatcc  
30121 tatcttgatc tctccacgct tgatctctcc gctatcttgt ttttaactcac ctaaaagtat  
30181 ttttaaaaaa gtagactttc cgcagccatt ttttctact atggcaatgc gttcaccttg  
30241 taaaatacga cttgaaaaat ctgtaaaaag agctttttct cctaaatttt tacttacatt  
30301 ttttaagctca aaaagcattt ttttgcgatt aggaattttt tctcctgtaa aatttaaagc  
30361 tgctcttgaa atttcaagct ttaaacgctt gatggcacca ggattttttt tagcttcttc  
30421 acgcatttta aaaatacgc ttttacgtcc ttcatttctt ttaagtcttg ctttaacacc  
30481 tcttctaagc cattcttcct cgctttttaa atgctttaaa agcgtttcat gacttttggc  
30541 taaactttct agaatttgag tttttttctc taaataattc gcataaccac ctttaaatac  
30601 actgagtttg ctttgatcaa cttctacgca tctatgtgca attgcatcta taaaatacct  
30661 atcatgagc ataaaaatca cgcacatctt tgaatttttt aacaaatcct ctaaaaagct  
30721 tgtcatataa acatcaagat ggttttagg ctcatcaagc aataaaatat caggattttt  
30781 gagcaaaagt atacaaagac ctaccctacg aatttcacca ccacttagag tgcaaaccaa  
30841 acgatcagag taatccaata ggctaaattc ttttaaaacg cgcgtgattt tagcttcgat  
30901 attccaagca tctttgctat caattagagc aattaaatca tctatttggt ttaaataatc  
30961 tttattcgta ggctcttttt cgagtttgct ttgcaatgct tcatattctt ttaaagtatt  
31021 ataaatttct tcaagttcga tttttatggc ttctttgaca cttaaatttg cattaaaatc  
31081 aacagtttgt gaaagcatgg ctatgctttt tccattttgc cttactactc tgccactatc  
31141 tagagttaaa gtgcctaaaa gcgcttttaa aagacttgat tttccttctc cattttttcc  
31201 tatgatggct attttttcgc cttcattggc gctaaaattt gcctcattta aaacaatttt  
31261 ttctccaaat ttttttgaag cgtcgattaa atcaataagt gccatttttt tccttagtga  
31321 agtttaaaac tgaattttaga accctgcgat acagtgctag aaatttctaa atagctttta  
31381 tgtatactta aaattttttt tactaaaaag agtccaagtc cgaaagaatt atcacttttg  
31441 gtattaattt tataaaattt tttcgttaata agctttaatt gatcctcttc tatacccttg  
31501 ccaaaatcca aaacactaat cttttgatct tgcgctatta aaataacttc tttttgacta  
31561 tattttaagg cattggaaag taagttgata atcacttggt cgattaaaaa ctcatcagct  
31621 tttaccttag tgctttttcc gcgtaaaatc actctttcaa aacctgggtt ttttaacgatt  
31681 ttttcacata aagcaaaaag atcaaatctt tgcatttgta aagcttcgtg gttgagatta  
31741 aaaacgaaat taagtttatg tgttaaagcg ttttagctta gactttggcg tgaattttt  
31801 tctaacaatt cttttttaag tttttcatct tttaaattct catccttaag catttctaaa  
31861 ctaagttcaa ttacacttaa gggatttttt aactcatgag aaatagcaga aataacactt  
31921 gctaattgag tatttttaag agcaatctta tcgctttggt ttttattttt ttgagtattt  
31981 ttttaagattt tctcttttgt ttttaaaagt tttttattta gcaaattgag ctctttaaaa  
32041 atgctatctt ctaaaataac agattttgaa tcattgataa aatttaaaaa ttctaaaatt  
32101 ttttaaaac tttttgctag ttttctccc ataaaaaaca ctaaaataaa aacaagcata  
32161 aaataaagcc caaagcttat gcttattttt aacaaaaaat tttgcaaat caaaaatctt  
32221 ggataaacia tgatcatata tttatagtct ttataggtaa aattttttac aagaattctt  
32281 tttagattta aatcataaat tgtattttct tttaaattta aaaataaatc cgcatttaaa  
32341 acagaagaaa tctcaaaatc atctttcaa ataataaaat ccgcccttgt atcttgtgcg  
32401 aattctttga tattatcaga atttaaatgt tttaaaagtg aaaattttta aacatcatca

32461 aggccttttga ttttttgttc gtattgcttt aagagtaaaa aattcaaata agaatttgta  
32521 agtgtgtaaa aaatcacacc aaaagataaa attagtagaa caaaaaagc tataaaaaata  
32581 tttttagttt ttagcatatc ttataaccaa tacctctaac gcttataata tactcttttaa  
32641 gctttgggaa tttgtttcctt agtcttggtta atgctatatt gattgtttta tgcgtttag  
32701 tgtcatcttt ccatacgctt tgcgttaaaa attgtcgtgt caataaagta ttgggatttt  
32761 caaaaaagca ttttaaaagc tcatattcta aatttgaaat atctaatttt tcatttttat  
32821 agaaaaattc ataattgatt aaatccaaag aaaaatcttt aaaaaccaat ctctcttctt  
32881 ctcttttatg acgctttaag atggctttaa tgcgaagcaa taattcatta aaatcaaaag  
32941 gcttgcacat ataatcatca caaccgcttt caaaacctt aagcaagtct tgatgcaggg  
33001 ttttagcggg tagaaaaatc accgcttctt tatagccctg ctttcttagc tctttaatct  
33061 tatccaaaga atctccactt ggaagatttc tatcaactat caaaagatcg atttgctcat  
33121 tatcgagcaa atcttcaacc tctttaaagt ctagcaagga aaaaatttga taatcacaag  
33181 ccttaagcct caagctaagc aaatcattta aatctgtatc atcttctatg ataagaattt  
33241 tagatttcga catattgtac aaatatacac gcctctaatt gtcttaattc ttctaaaact  
33301 tctttttgca ctttttcatc gattaatacc actgctaaag catatccaaa accatctcta  
33361 cccaatctaa aatcagcaat attgatattt ttagatgcta agacagagct gatttttagca  
33421 ataaccctg ggatatcttt atttttgaaa atgatcattt ttccttttgg tttgaaatca  
33481 gtttgaagc catttaatcc aactatgctg tgttcatttt cgttaaatac agttcctgaa  
33541 acattgatat ttgaattttc tgtgatgatt ttaacactaa gtttgttgtt ataaccacta  
33601 tttggaagag tttcgcaaga taagtccacg cttttttctt ttgcaacaaa ttcagcatta  
33661 acataattta ttttttacc taaaattcca cttaaagctc ctacggctgc aaaagtaagc  
33721 attgaagtag catattcacc tattactcct tctgcttcta gtttaatact ttttatagga  
33781 tttttatcga tttgaactgc taaaaatgcc atcttcgaaa caagttctat ataaggtgct  
33841 acaaaaggcg gtaaactctc ggttttaatc ggtagattaa gagcattagg gtatgctacg  
33901 cctctagctg cgctgagagc ttgttcacaa gcttctcttg caatattatc ttgactttct  
33961 agagtgtttg caccaagatg agaagttact gaaacatttt caaaatctaa aagaggatga  
34021 ttggtagcag gctctttttc aaaaacatcg ataccaagcc aagctatttt accacttttt  
34081 aagccctcac ataaagcctc ttctgtatat aaacctccac gagcacaatt aataagtctt  
34141 atgccgtctt tcattttttg aatttcattt ataccaatca taccattagt ttctttgggt  
34201 tttgggtgat ggatagtgat aaaatcgctt tgagtaagaa tttcatctaa gctttttgct  
34261 tgctccatat ctaagtctgt gatttttagaa gccgaaatat atggatcata ggctagtatt  
34321 ttcataccaa aagcttttagc gcggatggct acacgcgaac ctatattacc aaaaccgata  
34381 acaccaagg ttttaccat aagttctacg ccataccatt tttctctttc ccattttctt  
34441 tcattcttta aaaaattatg cgcattaaca aagcttctag cagaacttaa aagatgtgcc  
34501 atagtaagct ctactgcagc aatagtatta gcagttggga cattcattac tataacgcca  
34561 cgcttagagc attcagggat atcaacatta tccactccta ctctgcgcg tataagagct  
34621 ttgagttttt tagcatgggt taaaaaattt gcatccacat cagtagaact tctagtaata  
34681 gcaacttcta catctgcaag catatccatt aactcatttt ttggaacttt agcagcttct  
34741 ataagctcaa tatcctcagc ttttcttaaa agctctacac ctttatctaa aattgcatca  
34801 caacaataa tctttttttt cataaccaa tctccttcgc ttctgtatgg attttatatt  
34861 tttttagttc tttgatgata tcatcaatta aatttttatt gcctgtatct ataaagattt  
34921 caggactttc tccggatttt aataaaaaat acttcacatt aaaagaattc aaagtctgtc  
34981 ttaaacaaaa catggagtaa atatcatact tgctaacaac aagctgatag tatttatttt  
35041 tttctttaag ttcgctagta tctgcatcaa aatgtagtgt aaattgctcc acagcaggag  
35101 taaaatcttt actaggccat ttagctaatt cttcttgcca actgagttct cgggtttggt  
35161 ttttctcaat ctgatgtgta tttgtatctt tagcaaattc ggggataaaa ttagaatttg  
35221 ctttaaattt ccaaagcagt acaaaaacga caataagcaa aatgagcaat aaaatactca  
35281 aatgcttat agttgcatat tttttcatca ttaagctaac tgatctttaa tgatatcacc  
35341 taaagttact ttatcatcat tgttgatttc attcaatact tctcgtctt taattttaac  
35401 caaattttta acacttaggc gaattctatt tttcttttca tcaatgaatg caattgctgc  
35461 ttcaatctca tcaccgattt ttaaattctc aagagttgaa gcactaatat cttctttatg  
35521 gataagtgca tccacatttt tatttagctc tacaataca ccaaatctt taatatctct  
35581 gatttttctt ttaacaatat cacctacttt atgatttttg gcatattctt gaacagggga  
35641 ttcgctaagt tctttgatac ttaaagaaat tttttgccct tcttcgtcga ttttgataat

35701 cttaactttg ataatatcac cattgttaaa tttatcttta catttttcat ttctatccca  
35761 agatgcatct tcattatgca aaagaccttc tacagagcca atttttacaa aagcaccaaa  
35821 agaggttggt gaagttactt ctccttctat cacatcgccg attttatgac ttttcataaa  
35881 ttcatcaaaa ggtttagaaa gtaaatttct caaagatact ctttaagcgtc tttcgtctga  
35941 attgatttca atcacttcaa catcaatttc ttgacccttg cttatgtaat cttttggatt  
36001 ttttatatth ttatcccaag aaatttcact gatatgtaaa aatccttcta tatcgttacc  
36061 aagatcaacg aaagcacat atggctctat atttgaaaca ataactttga tagtatcgcc  
36121 cacttctaaa ctatctttaa tctctcccca aggatcaggt aaggctgctt tgatagaaag  
36181 ggataaatgt ttgcatctt tgtcgtatth taccacttta acaggaactt tatctccttc  
36241 tttgtataag atactaggat ttacaggtcc tttgtatgaa atttcgctat aatgaacaag  
36301 tccatcaacg ccaccacat caacaaacat accataagtt gtaatttttt tcacaacacc  
36361 ttcgataagt ctttcttgct gagcगतatth attaataagc tccttgcgtt tttttctttc  
36421 atcatctaaa gttttctttc tggatacaat aatgctttgt tcctctttat caactttgat  
36481 gatttthaact ttaaaggtht tacctataat attattatth tctttaaagc cgtattgtga  
36541 ctttggttag aaaaattcta catcatcatc atttacgaca acaagtcgca ctttattttt  
36601 tcccactact tttacttcaa aaatatactc atcatcttct ttataatttt gaataaattc  
36661 gataactttt tcttttctta aagctttttt gtgagaaagt aaagatctac caccacgaga  
36721 gcctataaca gcaactttaa tgctatcacc tactttaaat aacaaattag cattctcatc  
36781 ttgaatttca tttaatgcta aaataccttc tgattttcta cctatatcta catagacttc  
36841 atcattttta atctctacga ttacgccttc ggttatagtt tcttctcttg acttgtcaaa  
36901 agcttctaaa agctgaccaa agtcttcatc ttcaagatag tcctctaaat tgttttgaac  
36961 ttttttggtc acctcgctca tcatggctct tttgaaaaaa attaaaattt gactgatttt  
37021 acctattttt tctttaatta gtgttaagaa ttttaatttt tattattttt ttttaaattg  
37081 tagttttatt tactttttaa aaaaataaaa taccacgatt ttagcactta aatgattcta  
37141 ttttagctat aactttttta ataatccaat caggtgtact agcccagcg ctaattccgc  
37201 aatgcgtttt atttaaaaac cattcttttt gcaattcttc ttcagtttcg ataagatagc  
37261 tgtcttcgca atttgcctta gctattaaaa aaagttgctt ggtgttggct gaatttttac  
37321 ctccaacaac taccatcaca tcacttttaa ccgaaagttc tttgatggca tcttgatttt  
37381 taaaagttgc atcgcaaatt gtattaaaaa ctcttacctc tttaacctta agaattaaaa  
37441 aattgactat ttccataaaa tgctcaggtt ttttagtcgt ttggctaaca actgcaattt  
37501 tattaggcaa tttaatatct tcgagttctt ttttatccaa aaccacataa gctttttag  
37561 tcacataact tcttacacc ttaacttcgg gatgattttc atcgcaaaa atcaccacat  
37621 cataacttc agcactcatt gtctcgcaaa tttgttggg ttttagttaca aaagggcaag  
37681 ttgcatcaaa aatttcaata tctttctttt taagttcttc taaatcttgc ttggtgattc  
37741 catgtgtcct tataatagcc tttttttcat cacttaaagc ctttatatth tctaaggtht  
37801 taacattgaa atttttttgc aaacgagaaa tttcttcatt attatggata agcggtccta  
37861 tggctgctgc gtctttaatt gtctcggctt ttttaattgc tctttttaca ccaaaacaaa  
37921 agccataatt tttagctaat tcaataatca attctagctc ctatttttgc aagaatatcc  
37981 ataaaattag ggaaagaagt ttttaatacat tcaccttcat caatttccat tccacaaagt  
38041 aagcccaaaa tcgcaaaact catagcaata cggatgatct catagctttt tatcttagct  
38101 tttttgattt gagagccttc gatttcaaaa ccgtcttcaa gttcttttagc atttactcca  
38161 caaagtttta aattttcaac cgtagcagca attctatcgc tttcttttac tcgaagttct  
38221 ttggcattaa tgagttttaga tttacctttt gctaaggcaa atgctatggc taaagcaggt  
38281 gcttcatcta taagccaagc tatatthtct ttaacttcta ccgcttttaa ctcgcttgag  
38341 cttgcatgaa tttcgctat ggthtcaaaa tcattttgtg taatttttat ttcaagtttt  
38401 gcaccattt tttgcaaat tttgtaagcc tcaatacgtg taggattgag taaaatattt  
38461 tttaaaacta ctttagaatt aggtaaaata atcgcagcta aagcaaaata aaaagccgaa  
38521 gaaggatcgt taggtatgag aatatcttga gcttttaag cttgatttaa aggagagatt  
38581 tcaagactta aattatcttc actgattttt aaaggtgcat tcatagcttt tagcatatth  
38641 tcgctgtggt ttctacttaa agatatttcg ctaaatttgg aagttttatc tgctctaaaa  
38701 gccgataaaa tcatagctgt tttacttga gctgaagaaa tttcactttt ataatacaaaa  
38761 gcttttaatt tttgtccttc tatgcaaagt ggagctaaat ttgcctgttc tctgccgtaa  
38821 attttcgcac caatttctc taaggtttt caaattctt tcataggacg attattaaga  
38881 tatttatcac cgcttaaaac aaaaaagcct gaaacacctg ctaaaaatcc tatcattaag

38941 cgcattgcag tacctgaatt tccacattct aaaacacaat taggagaaag tatctcgcta  
39001 ggcgggtataa tgcttacatt agaaccttct cgtttgactt tggctcctaa attttctatt  
39061 attttaagag tatttaaagt atcttcagct aaaagataat ttttggcttt attttcacct  
39121 tgggttaaaa gcgaaaaaat agcaaacga tgagatatac ttttatctgc tgctatatca  
39181 gaaatttcag tattaagga ttctaaagca tttatcttca tcttaattca agccccattt  
39241 ctttaaagct ttgcaaaatt ttatccatat gttctgcaac ttgagcctct tctaaagttt  
39301 tattcatatc tctaaaaaca aatttaagag ttaagctata agaattttca aggcttgcgt  
39361 cgctatacaa atcaactaag cggaaatfff ccaaattttc taaatctaata tctctatgc  
39421 aatttttaat tttttcgtat tcaaaaccct taggtatgag tatgctaaga tctctgctaa  
39481 tgcttgaaa tttagaataa ggttttagcca atttaaaatg ctgtttaatt aaatttaaat  
39541 caagttcgca aatatatggt ttttagcaaat ctctttcatt ttctatffff aaatgcaagc  
39601 gacctgcgaa acctatffff aatctffff aataaatatc agcttgctca taaggactta  
39661 aaatatcatg ttttgaagct ttttaatttaa aatctcctat gatatffffta agatctaaaa  
39721 gaaaatcata aaaattagct aattcagggt ttgctttatt cgaattttta ggctcttctt  
39781 tatagcctga atgcacaaaa gctatatgat ttaattcttc attattgctt ccaaaaacta  
39841 ccccaagttc aaaaagttta atgattffff tagaattfff tgcattttaaa cttgctgcgt  
39901 ttagaagggtg gtttaaaagc gttgttctta gagtatttaa ctctgcagta attggattga  
39961 taagttttta ttttatagga ttaaaaccaa gggattttta ctcttcttca ttatccaaaa  
40021 cataatgcaa actttcaaaa tatccattag ctactgcttt ttttcttagc tctactagct  
40081 ctttataaatt tttataagtg gaatttaaac gatttttttc tacaaattcc aaaccttttg  
40141 aagcaatatt atcaatacct atgatacgca ctacttcttc gcaaatatca gctaaatfff  
40201 ttatatcagg acgatgcatt ggagctttta cattgacaag tccatcagca gaaattataa  
40261 gctcaaaacc taatttttta agaattttta aaacttcac tttgtccact tcttgcccta  
40321 tggctcttgct aatactttca atactgattg gtatattagg taattccttg cttgttataa  
40381 cttgctgtga ggagctgtaa ataatacaat ctggattfff ttctaaaaca cttataaaaa  
40441 aatccatacc taaatttaat ttaggttcac tacctctaaa acttctataa atagtttgct  
40501 catcttgctt tttataggac attttagcat ctgcaataat cattggatcc gtataatttg  
40561 cctcaatgat aattatctta gaatcttctt tgcacttaaa tttctcctct tgataaatcc  
40621 cactcacgct aagaagttca tcttggcaag aaatfffggg ttcgccatgt atttcttga  
40681 ctaaattgaa agtaaattct tcgttctctt tgtaaaaaga atttaaatca taagcattaa  
40741 aaagtacacc tgtagagtgc gttgcataat ttaataaatt ttctatagga tttttccaa  
40801 aattttctac ctgtgctaata cttaaactaa tgagtaaatt cgtttgaatt ttttcttffa  
40861 attctatagc tctgtaatta taaagactgt ttaattcttt ttcagcactc aagcgtaaaa  
40921 tacgacctat acctaaaaca ttctcccctt ctttgaaagg tggtttttct ttttaagttta  
40981 aatttaaagc cactgctaaa tcgctgctaa taccataaat actaagacaa tctcccctat  
41041 ttggagttaa ttcaacctcg atcaagccat cattaaaaat ttcataagaa tttaaagctt  
41101 ttccaagctc taactcccct atgctatcat ctaaaagcat gatgccatca ttgattffff  
41161 caaaaccaa ttctgtgcta gaacaaagca tgccacaaga atccactccg cgcaatftag  
41221 cttctttaat ctccataccg tttggcatta aagcaccttt taaagctact gcgacaaatt  
41281 gcccttgctg gacatfttga gctccgcaaa ctatftgcaa aatftcactt ccaacatcga  
41341 cttgacaaat actcaatftg tcagaatftt catgctftt tttttctftt ataaaaacca  
41401 ctacgattftt atctggcact tftaaggtgc aaatftctat tacttctata cctatagaat  
41461 ttaatgtatg tgctatatca tctaaactft tatcttctgaa atctaaccaa tcgcttaacc  
41521 aactfttagt aattatcatc taaatftgct caatagctt aaatcgctt caaataaaga  
41581 tcttagatca ggaatftgat gtaaaagcat tgcaaaagct tctacaccaa gaccaaagc  
41641 atagccactt acatctftt aacctacaaa atftaaatca ttaggatcta caaccacaa  
41701 tcctaaaacc tcaagccaac ctgfttgcct acaaacctta catccacaac cttgcaaaa  
41761 tacgcacgaa atatcaactt ctgctgatgg ttctgtaaat gggaaaaagc taggacggaa  
41821 acgtactftt acatcccaa acatataacg caaaaagctc tcaaaaatac tftftaaatt  
41881 tgcaaaactt accctftgct cctcttctac tacaagctc tctactftgat gaaacatagg  
41941 agtatgagtg atatcaaaat ctcttctaaa aaccgcact ggagctatca tcttaatagg  
42001 aggtftftgt gcaagcatgg tgcaatftg cacaggagaa gftftgagttc ttagaagctt  
42061 tftatcatca aaataaaaag tatctftgcat atctctftgct ggggtgagatt ttggcaaat  
42121 tagagcttca aaatftgtaa aatcatcttct tattaagga cftfttctta tactaaatt

42181 taaactcaca aaatattcta taattctatc catagtactc ataacaggat gtaaagcacc  
42241 atttgtagga ctttcatcaa aatagttaaa atcaagcgca tcttgtttca ttttttcttc  
42301 taaagctaga ttctccaaag ctttaaattt taacaaataa gcctcattaa aagcatcttt  
42361 ttgagaattt aatttagcag caaattcttt tttctcttcg cctgctagat ttttagctt  
42421 tgcaaaactc tccgttaaga tacccttttt tccaagaacg gcaaccctaa gagcttctaa  
42481 gtcgtttaa cttttacatt gttgaatttg ttcgataaaa ttttgcaatt ttctacctta  
42541 ataagttatt tttagtttta attttattaa aaactatfff aaattcagca taaaaactaa  
42601 actttaaaga tataattgta taaaattaac actaaagaag gataaataat gaaagaaaa  
42661 actgtttttg aactcattgt tgaagggaaa attccttgta ataaagtact tgaaaataat  
42721 gatttttttag cttttcatga tatagctcct aaggcaccga ttcataactt tattattcca  
42781 aaaaaacatt tcaaagactt tcaagaattt gatcctaaac ttatggaaaa atgacaagt  
42841 tttatacaag agtttagctgt acttttagga gtggataaaa gtggatatcg cttagtaaca  
42901 aattgtggta aaaatagcgg tcaagaagtt tttcatttgc attttcatat gctaggcggc  
42961 tttaaacttc ctaaagaaaa agatgagaat gaaaatcctc aagctttatt ttaatttatg  
43021 atagtgtttt tgcactatca taaaaaatgc ttattttggt aaagggataa gtaaaccctc  
43081 atataatgaa ttataaattt catcactaca caaatgcttt gcaagctcta gtccaaataa  
43141 aatagctggt gcaggacctg cgcttgtaat aacattttta tttacaacta cagctttatt  
43201 aactctatft cttttaagac ctgcttcgca acttgggtag caagtaaact caccttctaa  
43261 aactccagca gcatttaata ctataggaga agcacaat gcaagaaaca tcttacctc  
43321 gctatgtagt tttttaataa tgcttaaaat ttcatttgaa tttttaagat tattcatacc  
43381 atcaaaacct ccagctaaag ctattgcatc aagattttta gtatctacag cttctaaaga  
43441 acaatctgct tttatactga tcccatttgc accctttact aaaagttcat tatccaaaga  
43501 agcgataata acttctaaat ttccacttag ttccgcagct ctttttaata catctgctat  
43561 acctataaat tcagcttctt caaatccttg agctaaagga attaatactt ttttactcat  
43621 tttttctctc cttgttttta aatttttctt ctgcaattct agctttttca ttcatttgat  
43681 agttaaacc cactatcaaa aatatcataa aaagcacaaa agctatgatt aaaacaaaat  
43741 ccaaaactat catatcgca aaccttttta aaaattctag catattattg caaatcttta  
43801 aagaaaaatc aaacgataat tttatagaat ttaagttaaa aattttttaa taaaggttat  
43861 gttttgaatc aaaaaaatgt aagaatattt gtatttttcg ccatcattct tttttgggga  
43921 tatttttctt ttcctattga aatttttaca atcaaagaag ctgatgggac tataaattac  
43981 ggatatactc caaacgcaca agcttacata aaaagttatt ttatcactct tttacttact  
44041 gcttgctcgg caattattgg cgtggttatt ggttttagtc tcgctatctt acgtttttca  
44101 aaaataaaaag ttttaattt tatcatagat gaatatattg atattataag aggaactcct  
44161 gttatattgc aacttatgat ttttgctttt gtaattttta cttttatcga taatctttat  
44221 gctgcaatat ttgcactagg acttaatagt tctgcttata tagcagaaat cgtaagaagt  
44281 ggaattaata gtgtcgataa aggacaaatg gaagcagcgc gtgctatggg gcttgattat  
44341 aaaacttcga tgaaagaaat tatattgccc caagcgacta aaaatatttt acctgctttg  
44401 gcaaatgaat ttatttcttt atttaaagaa acctctgtgg ttggatttat aagtgttatt  
44461 gatattacta tgcaaagtca aagtcttcaa gcggtattat ataatccaaa acctcttatt  
44521 tttacagggc ttgtgtatta tatgagtgta aaaattttta gttattttgc taaaaaactt  
44581 gagttaagga tgagcaaaaa tgattgagat tagaaattta agtaaaaaat atggaaatft  
44641 agaagttatt aaaaatatca gtacgaaaat ttccaaaggt gatattatat ccatcatagg  
44701 tccaagcggg ggcggaaaa gtactttttt gcgttgatc aaccgcctag aactcgcaga  
44761 tagcggagaa attccttatca atggttgtaa tatttttaaat gaacaaattg atattaacaa  
44821 aattcgccaa aaagttagta tggattttca gcattttaat ctttttgcca ataaaaatgt  
44881 attacaaaat ttatgcttag ctctgtaaa aacaggaatt ttaaataag atgaagctat  
44941 aaaaaaagct gaaattttac ttaaaaaggt gggattatcc gataaaaaag aagtaatgcc  
45001 acacaaactt tcaggcggcc aaaaacaacg cattgccata gcaagaagct tgatgatgaa  
45061 tcctgatgtg attttatttg atgagcccac ttcagcactt gatcctgaaa tgataggaga  
45121 ggttttaagt attatgaaag atttggctgc tgaaggactt actatgatag tagttactca  
45181 tgaaatgggt tttgctagaa atggttgctaa tcgtatfttt ttcattggata aaggagagct  
45241 tgcagtagat gcaagcccta aagaagtatt tgaaaatcct aaaaacgaaa gattaaagga  
45301 atttttaaat aaagttttta atcactaaaa agccttaatt aaggcctttt aattaatccc  
45361 aacattcagc attcttaatg cctagttttg aagcactgaa tttcggattt attttagagt

45421 tttgctgac attgaaatct ttcaatactt tattgactat accgcctaaa agaagtaaag  
45481 aaatgatatt tgtaatcgcc ataaatgcca tagttaaatc agccaaactc caagcaagtt  
45541 ttaaattcat ttgagaacct ataaaaatca ttgctacggc agtaattcta aataaattca  
45601 ttagcaattht agaatttgta agatatttht cattagcttg agcatagtaa taatttccta  
45661 ttaaagaagt aatagcaaat aaaacaatag ctatggtaat aaaatgaact ccgaaactac  
45721 cataatattc gcgcattgct tcttgatca aaggcattgc tgttaaaaga ggctttccat  
45781 cagctcctac attaaaatat gccatagaaa aaagaactaa aaagcccga cttgtacaaa  
45841 caataacatc aatcaatacc gaaaaagctt gtattatacc ttgttttgca ggggtggcttg  
45901 taagagcagc tgcagcagca tttggagcag aaccatacc tgcttcattt gaaaagagtc  
45961 ctctthttaat tcctataact aaagcagaac cagcaaatcc gccaaaaatc gctthttaat  
46021 caaaagcact ttcaaatata agcgatacca cagaaggaat tttatcaaga ttgatcaaaa  
46081 cagctataag agcaagcaag atataagcta gtgccataaa aggaacgatt aaagagctta  
46141 cttgctctat ttttgatgg tgcgagaaaa acatccaaat tccaaaaagg gttaaaataa  
46201 taccaataat cataggccaa gaacttgaag caaatctgc tgtagcatta ggattgaaca  
46261 tatcataata aactthtaaa gctgaagtca tagtttgact ttgaagtccg ttaaatccat  
46321 aagcataagt gatgatgaga ataaaagcaa aaaaagctcc aaagaaatga gaagctaaag  
46381 ctthtthttht ataataagca ggaccgctt taaatctcc tgtattgtct ttagacttat  
46441 aaatttgctc caaagtgctt tctgcaaaag ccgaagctcc accaaaaaat gccataagcc  
46501 acatccaaaa taaagcacc gctccccctg cggcaattgc aatagaaatt cctgcaatat  
46561 ttcctatacc tactctagaa gctgttgata tcatcaaagc ttgaaaagga gatattgtct  
46621 cctgggatg gthtctattt ctttcggtga gaattthttaa aacagacttt agcatacgaa  
46681 actgcacaaa tctagttht aaactataat aaattccgca gattatcagc aaaaccacca  
46741 ttatagtgtc agtataaggc aagacatatt cgagaaattht taatatttht tcatcgaatg  
46801 ggattgaggg atthttaaagtt aaattthtgtt caccatatt tctctthttaa aaaagthttaa  
46861 ttcgctacaa ctthtagcata thtthttaga aaaaatattg ataattthtca aatattthttaa  
46921 aaaaatataa aataaagaag attataaacg aaaatgatca aaattthtgtc gcaaagcttc  
46981 ataagaaaca ataccaacac tctgtggccaa atthttaaact ctaccacaag ctthtcatagg  
47041 gattgtaatg gcattatccc aattaagctg cattaattcc atcggthttaa catagctctc  
47101 gctacaaaa aataaaaaat cattthtcttg aaattthtagct tgaaaaataa atthtattact  
47161 thtthtgtgtc gcaaagaaaa aacgatcttht gthttaaagaga thtthtthtcaa gaaagatattc  
47221 thtthtthtcc caaattacag gctcaagctt thtthtcaata tcaagccctg ctctacgcac  
47281 tgctthtthtga gaaatatcaa aaactatagg thtthtataata tgcaatttht aaaccgctt  
47341 aaaacacatt ctacctatac tgccagtatt thtthttagaatt ctaggatgta ccaaaacaat  
47401 attaaacata atthtaccaca acactcttg gatattcagga thtthtthtga ctaaaatttht  
47461 ataattgata gtctthtaaaa aatctgccc aatattthtga thtthtcaata cacacttht  
47521 thtthtcaaaa tctthgacaag aaaagctatc cattgaaatt thtthtcaaaa thtthtthttht  
47581 attagctagc aataaatctc cctthgctt ataacgaaac aaacctctg catagcccaa  
47641 atcataggta gctattthtga thtthtctgt cgcactaaaa gctccacct agcttacct  
47701 thtthtctatt tgtaattctc tgcaacttht cctatgagcg tataagctta aaaccttht  
47761 taagctthtca tcccatagc caaattgctc caaacctgt ctgcaaaatt catctthttagg  
47821 tathtthtcata gctthtataa aagctgcaga attatgagcag thtthtataca aathtthtata  
47881 aathtthtctta gcaatattct tggcctthtga aathtthtctt thtthtgaacaa aaaaactthtgc  
47941 atccattthtca tctgcacctg caaatgctg aatataacct tctaatthtca aagtthtgaatg  
48001 ctthtcttht aacaaggcat cattthttaat thtthtcaacaa attctthtcc gatgctthtcc  
48061 tgtgtctatt thtthtcatgta thtthtthtatt attctgataa gctthtthttht tactthtattc  
48121 atthtthtga caaataaatt taggatttht thtthtccatgt ggggtgatgag aaagthttaa  
48181 aatattgtca aaaaaatctc cgagctcata agctthttht thtthtthttht ctgctataaa  
48241 attaacgcct aggtthtthttag caagcggggc tagaatttht gccctatgct cgtaagcgtt  
48301 atctthttht acacaaatca atctcgaaaa gctacctatt thtthttagct tagthtthttht  
48361 attactthtctg taagctthttht gattaatttht aatthttaggac attattthttht thtthtgaatg  
48421 thtthtcttht ctthtthtctatc aathtthttht thtthtthttht thtthtcttht aathtthttag  
48481 thtthtthttht agthtthtctc ataaaacgaa attctthtata tagctthtctt thtthtcttht  
48541 ggataaggac thtthtthttht atccgaaaa thtthtcttht thtthtcttht thtthtcttht  
48601 atggacttht thtthttagaagc aathtthttht aathtthtcttht thtthtcttht thtthtgaattg

48661 ttttcatcat agaaatthaa ataagtatth atatacactat ctgtccaagc taatthccaa  
48721 gcaaaaagat ctgcaagcaa agcagctata tcttctthtt tagctcttac tthttcttht  
48781 tcttctgtca tcgcaatac tthtttatct tgcactactt tagcaaatc thcaagatth  
48841 tcattaaaca agctataca accgcgtgtt thaaatthcat ctagtcttgt thcatctaaa  
48901 ggatagccat gtatccaaat thcaccacct gthttacctt gaactthtacc aagtagatth  
48961 ggataggtt tagcaaatgc aaaaggacca taataaggat thcctggatt aaatthgctg  
49021 ccaagthcat aaaaacctac tggagthttt aaatthcctt caactthttt atthcccatc  
49081 agtctgtaa taatagctth ttgctcaaaa thcttgcttaa thctthctt attataagaa  
49141 tagacacgaa gaatthtacc tgtthtattt gtaagcacga tagaaactth atcatcataa  
49201 tatccaagag agatathttt atcgcctatt thcatctaac aaaaacttht attagthaat  
49261 thctthtcaa thgccgcacc cacagcttcc aaaccttgat thaaataaat thttaccaaa  
49321 thcagaagccc caagagcccga aacacataa aaataaaatg thaaattht thtaagcaaa  
49381 gctthttctt taatthgtatt tataatatht thgagaaaaa thgtctgtgat thattattht  
49441 thttthcttaa aaaaatgtaa thtatataat thtattatgc thaatctgta gaatathctca  
49501 gataatgaaa aaatcaactt thaaaaggtgt thgtthaatth thtgaaaaat thttthtatag  
49561 tagtaatgth thctgattata thttctgctga thctthtata thttatagat aaaaaaagg  
49621 ataatactth caagctthaat acctgcctt cattaaaatg thgattthaat thcacaagatt  
49681 gcactthttc atthtaatgga aaacaaatth tagthctgct thtathctaaa thtataaaaa  
49741 thctthaaaa thactgctatt aaagthagta atththcctt thaatccaaat thaaaaatta  
49801 aaatthtatag ththaaactca thtataggaa acatthtthc acaatthaca aatacaaaag  
49861 atgcaattat thtcaattht acaggaaaaa thgtthacaga thgattthctg thtagggttg  
49921 agthctthaaa caatgataaa thctacgggtt thttctthtga thttgatgth actthgcaaa  
49981 aaatatacaa thagtcaatc thtacctcaa atthgaattht thactathttt thaaaaaata  
50041 atthgattatt thctthttgtt thgatataat thaaataatt thtaactaa aataataagg  
50101 aaaaaatag aaaaaatta thtacctagg thgtthtatt thcattaagth thtgcttaa  
50161 agatathagaa atcaaatagat cattthataa acaaatctcg thctaatgctg thaacagthg  
50221 thattthctt acctthgtta ataataccga thaaagacat thctthaatag atgcaaaaac  
50281 thgatataaat caagthtagc aatthcatac thcatgctcat aaacacggta thgaaagccat  
50341 gatacaaat thcagaaatac thgtthaaagc acatthctag thaccgagthaa aacctggggg  
50401 thtatcatatc atgctthtth aactthaatca acctgthgat aaaaatacca aagcaaatth  
50461 aactthtaatt thtgacaaca atcaaatgth agaagthcgc gatathaggat caaaagagth  
50521 athagataatg aaaaaagth thttthtatt thgctcaggc thtathcttht thattcttht  
50581 thtcatatht gaththtath ththaaaaa thagaacgaca ththaatcaaa thgacgatt  
50641 atcgccttht agctgthgatt thaatathgaa aaatthgact thataattht aaaaatagaa  
50701 ggthtttagth thcatggatc caaagctct thcaatcttht gaaattaca atthaaaaat  
50761 thaaaaatth ggaattata aaaaatthaa aatthaaat thtggtthaa atathgttht  
50821 gggagatata atgcctaaag thcaataaaat thaatgaaaca gactathgag thaaatagth  
50881 thtagctgca thgtgthctg aggtthatgc ththtagagct gaagthttth aagatgataa  
50941 gcctathagth thtcatthttg atthctgact aaaaagatga aaaaagthtt thtathgtg  
51001 atcgcctthg thgcatagg thtathagct thttthttth caaataaaaa thcaatagc  
51061 ththaatctaa gatctgctth thaaagacaa acctthttg aagactthaa aggthagaag  
51121 thtatagtht atthttgtht thctthttgt thctgathat thctctctac thctcttht  
51181 atthgthaga atthtaagth thctthaaagc thcaagagct atgthcttht thttcttht  
51241 gataththt gagatgthaa thgthactth actaatgath ggtthaggth thttthctct  
51301 aatgcatag thctthattgc aaaaaatgath agthgtthth agaaagthg thaaaaatth  
51361 ggggtthcaat atcaaaaaat agataththaat gathctgthg thgaaatath thgtgcat  
51421 agcagthgaaa thttthcttht cthgthaaac gthgaaagth aaaaaatcat thagaththt  
51481 aatctgthag aagthgcaaa agagctthaa aatththctaa gctthaaagth aatthththt  
51541 gcaaaaagat cggthgaaag atathctthca gctgthcat thtagcacagth aagaattht  
51601 thtathgtgga atthttthagc caaaaccth gctgcaaaat thtthgcatc atthgaaat  
51661 thtaccataa thtctgthtt agcagctct thtagctgth thtatagcat thctthgct  
51721 actgthaatg thtctgtht aacaththt ththaaagath caggthaaa atthgctct  
51781 athctthgth thctthagct thctgctth caactthgth gthaatgthg agthaaagth  
51841 thtathgthcag cthgathgath thttthctaa thttcttht aactthctc aactctctg



51901 atggttccac ctgttccaaa gcccgtaca aaaatatcaa gatcattatc taaatctttt  
51961 aatattttcca aagcagtggt cttacgggtg gcatttttat ttgctaaatt ttcaaactgc  
52021 gatggcataa aagaatttgg agtatttttt aaaatttcat tagctttatc cactgcgctt  
52081 ttcataccca aacttgcagg tgtaattca agttttgctc caaaaagagt catcattttg  
52141 cgtcttttcta tgctcataga ttctggcata gtagcgacaa attgaagtcc tagatccgca  
52201 cagatcattg ccaatgcaat acccgtatth ccactttag cttcgactat aacagtctta  
52261 gaatcgattt taccctcatc taaagcgctt tgaatcattg caaaagccgc tctatctttg  
52321 attgaatgac ttggatttaa aaattcgcat ttggcaaaaa gatttgcacc aaatttctct  
52381 aattgtatta taggagtatt gcctataagt tcatttactt ttttataaac tctcataaaa  
52441 ccaacctttc aaaaatttag tttcaagtaa gtttataaaa ataaagtaaa taaaggatat  
52501 aaattgtcgg attaatthaa aaattttatt cgttaaggct agaaaagctt ctagccctaa  
52561 tattattttt tcttttttagc ttttgcaaca gcgtctthaa ggtttttacc cactthaaat  
52621 ttagcaactc tagttgcagg aaccttaatg gttttaccag tgcttggtac tcttgcttct  
52681 cttgcagctc tttcggctgt tgagaaagta ccaaaccta taaagctaac gctatcacct  
52741 ttagccaata catcagtgat agtagaaata actgcgtcag tagcagcagt agcatctttt  
52801 tttgttagcc cagcggtttg agcaacttgc gaaatgaaat ctgctttagt cataaaagct  
52861 cctttgtttt atattgaaac gcctaattct agcatattta gaaaacaata tcaagtaaaa  
52921 acaagttttt ttaggatttt ttttgcattt tataacgctc aaattcccca ctattgtcaa  
52981 tttcattgcc tattttttca tataaactat aatagaattg aacaattct ttacattcag  
53041 gatgaagagg cataaaaata tcatttttcta aaatacaaaa acgattthaa aattcttttag  
53101 catcaagctt taaagcataa tgcttggtca aatcgtggta atttttthaa gttgcatcct  
53161 taaatttttc ataataatct agattgaaat taacattthaa tttatcattt tcaaatctca  
53221 aaactccact ttgaaacaat agtgataaat gaataagtcc ctctgtataa taaggctthaa  
53281 cctcttccac tctttgcaa gctatcaaag atacagctct tthtaataagc tcatgaaaaa  
53341 caggtaatth taaatctct tgttcatgat aaaagaaatt aacaagtcca ccacttgttg  
53401 ccttgactc ttcgatattt thaaaaagc cactttgatt cataagtttt tcaactgtctt  
53461 tagcggtaaa aatatatga ccaaatthcat ggcctatagt tgaacctca taaactcttt  
53521 tccaaactth ttctttgaaa aataaaatat ctcttccata gttcaaaaaa tctttatcaa  
53581 aaatttthact agcaattctc atgaaagggt ttgtttttgc attttthataa acaaaattth  
53641 aaaaagcaaa gatttttttt cctgcgatag aactthacaga tthcatthata ggaacaactt  
53701 gtgcagaaaa taaacctthaa agttcagctc cataataaat catcggcgca caaatataaa  
53761 gctgtgtttt atcgatatta tgcaaaactt cacttttgag ttgctcatct tgaataccaa  
53821 tattttcata tacacgcata aaactttgtt taatctcttt tgaaaatttt aaggatthcaa  
53881 aatcactctc atcttctatt cttatatccc actccaaggc tacagcatga gtgtaactat  
53941 cttcataata ttctaaagga tgtcctactt gcaatggaga tttgactthc atccatgcaa  
54001 attcagctth ttgccatgcc cctataacct ttttttctc cttttcgcaa aaagcthaatt  
54061 tthacttttg aaaaatttct atataagcta gctcgtctthc attttttagct atttgtthta  
54121 atthtatgaat catatthcatca aaagcaaat cgagttthta aattthcattt thaaaaaatc  
54181 ttgcataagg acaaaattthc catatattthc ctattctthac caaaacgccc tagctthctct  
54241 cgcaaatatc accctttgga gttgtttgat agagttgatt ttttctgthaa aattthcattg  
54301 catcgtcthaa atthtgaaat tgggttgcta aaattthatt gtttttttct ataatctctt  
54361 tagtccatga aactthcaaaa gcattgatga ctaagcctat attatgcact cttgthataa  
54421 gattttgata aaaaacttht acaattttthc tttctttgag ctthataatt agctcttgat  
54481 gttctttttc ataaaatttht cttatctctc cataghaatt atgtthtaagt thcagtgattt  
54541 tttcttcttht aaaaatttht ttttttccact cttgtatthaa attttctthc thaaagatcaa  
54601 ctaagcgtct taatatagcc aaaagagttg tcttgtctct ttttagctca ctaagagcca  
54661 aaagtctctc aaaatactca tcccattgct caghaatcthaa aagattthaa aaaagattga  
54721 tattttcttht acgattthctt acaagttttg ctaattcttht ghaaattthc atactthttgt  
54781 tctctttttt aactththata aattthaaatt cttttttthaa aataaggagt aaaaaatgag  
54841 aatatggga gaacaaaat thaaaaattgt cgcaatgcca agcgatacca atctthcagg  
54901 thaatatttht ggtggatgga tactthcgc aattgattth gcaggagca tagcagctag  
54961 agaactthct cctgagcgc tcgthaactat atctatggat aaagtagtht thaaagaacc  
55021 tgtttttata ggcgatatta tttcttgthta ththaaaaat gtcagtgtag ghaagactthc  
55081 cataggcgha gaagthagaag thactgctca aagagthagat thcghaaggct gcactthctg

55141 tatcaatgta acctctgcct tagttactta tgttagtgtt acaagagagg gaaagaaaa  
55201 acctattagt gaagaattga agaaaattca tggatttgta aatacttaag cttattttt  
55261 tgtatgataa aaactttatc cttttaagct tatcagcatt tgtttaaacc gccgctatta  
55321 tttttttat ctaaaccatt cttgaaaaat tctcctctag tttttggggt tttttcagga  
55381 tgtttatggt tcatgtgttc tagatactta tcataactcg aaagtccac taagggatga  
55441 aaaaaccttt cggctttttc atagtaatgt ttaaactttt tgaattcat taagttaat  
55501 atatttagtt tcttttagtg gaattttaat cttacctagg caaattccta tgcaagagag  
55561 tatgacaagt aatgttgcta acatgaaaaa tacgcaaaga attgcattga ttaaatttcc  
55621 aattttgctt tgagtggcta tagaaatttc tttttcaatt gctgcaattt cattttcatc  
55681 ttttaacattg ttttaattca attccaaatc ttgaattttt tgactttgta tagtaactgc  
55741 tgccacatgg cttacagcat ttcctacttt attcccttct tcataaggca taattttttg  
55801 tattcctcca tataaagttg ctactaaaac aaatgtagca ggaactaaag ttaccaagt  
55861 atattttgcc ttgcccattt ttacaagtat ggtttagca agaagtaaag ccatacctgc  
55921 aagcatttga ttgcttacac caaaaagagg ccaaagagta taaataccac ctttaggatc  
55981 aatcgcacct tgataaagga aatatcccca tcctgcaaca cttaatgcag ttgctaaaag  
56041 tccagctgga taattgtgaa tttttcctaa aggtttataa acgttacca atagtcttg  
56101 caccataaaa cgacaagctc tagttccagc atccacagct gttaagataa ataaagcttc  
56161 aaacaatata gcaaatgat accaaaaagc cattagatca ataccaccaa aaagctcatg  
56221 taaaatcaaa gctacaccta tggcaaaagt cggagctcca cctgttctag aaagtatagt  
56281 gtattctcct atattttagt ttaaagtaga aatttcttca ggagtgatgc taaatccca  
56341 gcttgaaata gcttgtgcag cacttacaac atcagatcct attaaagcag aacttgaatt  
56401 tatagcaaaa taaagtccag gatgcaagat acaagcaca atcaaagcca taaccgctac  
56461 agcactttct gcaagcatag aaccgtatcc aacaggtagg gcatgagttt cattttcaag  
56521 catttttggg tagttccac ttgaaataag ggcatggaag ccactaatag cgccacaagc  
56581 aatagttata acaaaaaatg ggaaaatagc acccgcaaat acaggacctg ttccatcaaa  
56641 atactgagta ttggtttttg gcatttgtaa atcaggtgca acaataataa tggctacagc  
56701 catcacaaca ataacaccaa tctttaagaa agtagaaaga taatctcttg gagctaataa  
56761 aaaccataca ggtaaaacag ctgctataaa accataagcc atcataataa tcgcaaaagt  
56821 tggagcttcg agggtaaata tttttgcca ataaggatca gcagctataa cactaccata  
56881 atgaatagct aaaattaaaa gtacaaaacc tataactgaa gcctcaccta ctctacctgg  
56941 acgaataaaa cgcatataga ctcccataaa aattgctata ggaatagtca tcgcgattgt  
57001 aaataatccc caaggcgatt ctgctagagc ttttaccacc accatagcca aaatagcgat  
57061 aataatgagc ataataccea aaattgctac catagcaaca cctccagtaa aactaccat  
57121 ttcatctttg attatttcac ctaagcttct accccttcta cgagtagata taaaagcac  
57181 acaaaagtca tgaactgcac ctgctaaaac acctcctact aaaatccaaa gcatagaagg  
57241 caaatatccc atctgagcag ctagaatagg acctactaaa ggaccagcac ctgcaatagc  
57301 agcaaaatga tgtccaaaca aaaccgttct atttgtagga acaaaatcgc gtccatcatt  
57361 ttctaaaacc gcaggtgtag cacgattttt atcaagttct aaaaccttat atgtacaaa  
57421 gcgtccataa aatctatatc ctatcatata gatacacaca gcagcaacca ctaaataaat  
57481 tgctgacaca ctttcgcat tttgtagagc caagtgagca aaacaaatag cgcctaaaac  
57541 tgcaacaac agccataaaa ttttagttcc aaaacgagcc atagttctcc taaaataata  
57601 aaaatatttc aaaggatacc aaatttataa acaacaaaa caaatattt gtttagttta  
57661 tttacatctt agaaaaaat attctttttg tttctttaag tgacattttt caaaaaaat  
57721 aaaaatacaa tctatattac tttttataat ttttttaata ttgatctgat taaaataagt  
57781 tttattgttt aggatcaaaa tttttatata atattgcttg attttatttt ttattattaa  
57841 aaatatcttt tattgtttta ggtaaattat tgaacaag aaaattatag aactaccaat  
57901 atagatagtt ctgattcatt ttgtattaag atagaatatt ctcaaaaaat atagttaaat  
57961 aaaaagagaa tttacacttt cattgtggta aacacggcgt attacttcag caaatacagg  
58021 agctacgctc aaaactttta tattgggcaa ttgttctctt aaaggaatag tatcggtaac  
58081 tacaagctca tcaagtgttc ctgaagcaat tctttcataa gctttaccac ttaaacagc  
58141 atgctgca caagccataa cagattttgc acctttattt tttaaagctt cagcggcctt  
58201 tacaatagta cctgcagtat caataatc atcaactaag atcacttctt tatccttgac  
58261 atctccgata atattcatga cttcactctc attagccttt tcgctcttt tatctactat  
58321 aactatatca agtcctaaat ttttagctac acttctagct cttgctactc cgcctatgct

58381 aggacttcca acaatagcat ttttaaaatg cttggtttta atatagtcac taaacactat  
58441 acttccataa agattatcaa ctggtatata aaaaaaacct tgaatttgtc ctgcatgtaa  
58501 atcgatagta gctacacgat caatccctgc tgcttcaatc aaattagcaa cgagttttgc  
58561 agtaataggt actcctgggt ttgccttcct atcttgtctt gcatagccaa aataaggaat  
58621 aatagctgta atagaatttg cacttgagcg tcgtaaagca tctgttaaga ttaaagctc  
58681 catcaaatta tcattagtag gcacacaggt actttggata ataaaaacat ctttgccacg  
58741 tacactttca tcaatttgaa cgctaatttc tccatcgcta aaacgcttta ctccagcatc  
58801 gcttaagggc aaagaaagat atttagaaat ttgtttcgca aattctacat tagccgaacc  
58861 tgaaaaaatt ttataaccgc gcataaaaga cttttatga ataataataa aataagattt  
58921 taataaaata aaatttaaaa aatgctgtaa attttcaaac tcttagatta aaatacatat  
58981 tttttacgaa acataagcgg ttttttagc ataatatctt acaagcatag acaatgaaaa  
59041 acatatagca aaataaataa gagcaacaaa acctatagtg gctaaaattt catcaaaact  
59101 cgtaagtcta gctaaaatat ttttagaatt ataagtaagc tctgctatctt gtaagcctgc  
59161 taaataagct gtatccttta cagtagtcac aatctgagaa agcaaagatg gaacaacttt  
59221 tctaaaagtt tgaggcaaga taatataaaa aagagtaaaa aatttaccac acccttgaga  
59281 ataagctgct tcaaattgtc cttttggaat agaatttaaa ccaccacgta taatttcagc  
59341 cataacagaa cttgtatata atgaaaatcc tatagttccc caaaaagctt gtggcatttg  
59401 tggaaaaaat gaaggtaaaa caaaacaagc agcaagcatc cataaaagca atggagattt  
59461 cctaaaaata tcaatatagc aagttgctaa aaatctactg aatctatccc cataattttt  
59521 agtaatagct aaaaaagtcc caaaaacgat agatatgata caagttgcca aggcaatttt  
59581 aagggttaaga gctagacctt gcattaaaaa ttcaatattt tgagcattaa aaacattttc  
59641 cataccaaac cccttatctt gttaaatgag cttttttaag cttgtcttca taaacttttg  
59701 caaaatagc caaaggataa caaatgataa aatacaaaat tgccgcaaaa atatatgcag  
59761 gagcatagtt tccataatca gcagcataac tatctgcaga atgcataagt tctgctccac  
59821 ctataattaa caatacagaa gtatttttaa tcaaatttac catttgattt gtcacgggtg  
59881 gtaggattat ttttatagtt tgtggaacta taatatatcg catctgctga atataagtaa  
59941 aaccttgaga gcttgaagct tcaaattgtc ccctaggaac agataaaatt ccacttctta  
60001 caacctcact tacataagca ccatgataag cacctatacc caaaacaccg atggtaaaaa  
60061 tatcaagatg gattcccaag cctggtaaag caaaatacaa aaagaaaatt tgtatcacca  
60121 agggaatatt ttgaaaaagt tcaacataca ctcgagtgtg ggctcttagg attttaattt  
60181 tacttgtagc cattacaccg cctatagttc caaaaacaat tgctataagc aaagcaagaa  
60241 tactcacttc taaagtataa ataaaaccgc taataaaaagc atctccatta tccaaagcgt  
60301 ctacaaattt ccaaatcgca aaaggatttg tactactttc atcatataaa cccaagaac  
60361 taaggagttg ctttaattta tccacaaagc ctacactctc attcatttta taaacccat  
60421 tttttagcta aagcgtcgat ttcagttttg ttttgtttta caaattcgtc aatataattt  
60481 gaaaaattta catcatcttt ttttghtaact atgccatagc tttgaggatc aaaactatca  
60541 ggtaaaattt cattattttc atctttgtag cctagcaaaa tagattttatc aactgaaaat  
60601 gcatcaattc tttttgcatc caaagctgct tttatactag gataatcagg aaattcgctg  
60661 aattttactt taacgcctat ttttttagct gcagtattga taactttttt agtagttgct  
60721 gcttgagcta cacctatagt agcaccattc atatccgcta aagattttata atttttctct  
60781 tttaaaacta aaagccctac agcatcttga taataaggct ctgaaaaatt atacactctt  
60841 tttctctctg gagtgatagt gaaagttgct ataaccgcat caacactacc attatcaagt  
60901 aatggacctc ttgttttagc atttactgct acaagtttga ttttcttctc atctcctaaa  
60961 atacttttag caagcatttt agcaacatca acctcaaagc ctttaatttc acccgtagct  
61021 tgatcaagta gagcatagtg tggcacatca ttttttacac ctacaactaa ctctccttg  
61081 gctttaatag cttcgagttt tccttcagct gcatttgcac tagtaaaagc catacaagct  
61141 cctaaagcaa gtgctgctaa tttcaataaa gaatttctaa aaaccatatt atttctcctt  
61201 tcaaaatttg gtttaatttt taagaatttt tcccaaaaag agtcttgctc tttcggtttt  
61261 aggattagaa aaaaactcac taggaacatt ctcttctaca atagcgccat cttccatgaa  
61321 gataattcta tcggcaactt ctttagcaaa acccatttcg tgagttacca caaccatagt  
61381 tgtattttctt tgtgtagaaa tttctttcat tacatccaaa acttcttgta tagtttcagg  
61441 atcaagtgct gaagtaggct catcaaataa gatgtaaggt ttttttagtg atagtgtctt  
61501 tgcgatagca acacgttggt gttgtccacc cgaaagtgtg gctgggtaaa catttgcttt  
61561 atccacaagt ccgaccactt taagatattg ataggctgtt tcttcggctt cttgacgcga

61621 ttttttttga agtttcatag gagctaaagt taaatthttgt aaaacagtca tatgaggata  
61681 aagattgaaa tgttgaaaaa ccatagcaca atatthtccta caaatthtcaa tctthttttt  
61741 atgattthaaa acaagattgt ttacaacaac ttcgccagaa ctcacctctt caagtccatt  
61801 catacaacga atagtggtag tttthccact tccactagga cctataataa caagthtttc  
61861 gcctthctta acacaaaggt taatthtttt aagaacatga tgggttccat aatthttatt  
61921 tacatthctt aactctatca aaatctthcc tttthtgatt aaactthaaa attataata  
61981 ataggtttht ttatattgac aatattatag cattaaaatc aaaaatttht gctaaagata  
62041 gtaactthtat thtaatgaag atataaaaaa gtgtaactth ttgtaaaatt taagaaaata  
62101 taatcaaatt thttcatagt acacacctct aggtgaaaaa atthttttga aaaatgcagt  
62161 ttcgggaatc aaatcagcat tgccacata taacctgcca ttatcagcta aaatthgata  
62221 aaaacgctcc atgagthtaa thttagaatc ataatcaaag taaatcatca tathttctaga  
62281 agcgataata tcaatthttc caagccttht aaatthtatct tcaaaaacat tacacaattc  
62341 aaatctacat gtacaaaggt cgctthttatt gatactaaat gthttggtctc caatatctgt  
62401 gaaaaatctt thttthttcgc thttcgcttag acgttgtaaa gthttctact gatathttacc  
62461 cgctthttgct thttcgatta cgctthgaatt tatatcaata cthaaaatca tcatatctth  
62521 aaggaaattc tgagctccta aaatcgccat agaatacacc thttcaccgc tagaacaagg  
62581 agcgctthttag atathttaccg thttthttcgag gctthtttagca taataaataa thctthttta  
62641 thtgcgacaat thctthtaaaa aatatgthttc thcttatggta acaaaatcta aagtatcttg  
62701 cctaagthgt ctatthgattc gaagctthgt taaaaattca gcaaaagtht thcacctgc  
62761 atthgaaaca aatthtgata atthtaagc taaaatatht thttthttcat thaaatctat  
62821 accactaatt thcattaacaa thcttgataaa thcattaagt thctaattcac taggattaat  
62881 thttthctthc ataaattcaa accctcattc thcattthata aaatthtaaaa thctthgtth  
62941 aatthcttht aaactcatag gcctthaatth tggattthata thctthttgctc thttthggcat  
63001 accatataca atactatcag cthcattthc acacaaacat thttacccta cthtatataa  
63061 thcaacaac cthttagccc catcatctcc cattctgtt agtattacag thaaaattht  
63121 atthgtctth atcaaaggca cagccgagtg aaatagcaaa thccacattcg gthtaagct  
63181 thgtagcaact thctthccaat thggcataag atthtaatth cthgataaaa tagtathttt  
63241 thggcaata taaatthtat thgtcaaaac thctthtatcg thtaaaagac thactthcgct  
63301 taaggctthct thattaaact gattthacaaa agaaggtata aaactthgcac thcatatgctg  
63361 agctataact acgcaagtat thttthtatatc cacatcttht aataaaaact thcagthgatt  
63421 ggggcctccg gtggatgac ctatcaatag gagthttcatt taatthttccc thctatthgtt  
63481 aaaatggatt aaaattctta aaatataat thgtaacatat atacaaaaa thaaagcttag  
63541 thtttaatth atthtgaaaa caaaaagctt thttthtatgat thgttatgtt aatatagacg  
63601 cthtaattht taaaattgtg gaatthttat gctthagagaa aaaatthata thgctagcga  
63661 thcatgcaggt thtatgctta aagaaaaaat thgtgcttht thtcaagaaa agcaaatthc  
63721 thttgatgat cthggaacaa ataatcctac aagthgtgat thtccagatt atgcacatt  
63781 gthtagctcc aaaaatagatg acaaaagtht tgggatttht atthtgcggct thgggatagg  
63841 aatthctata gctgccaatc gtcataaaaa thttcgctgt gcctthtgta atgaaagctt  
63901 gagtgctaaa cthtgctagaa agcataacga tgcaaatgtt thggctthttg ggggtagatt  
63961 ggtthggcatt gatgcggcta thgatatgat agaaaattht atthcaaacac cthttgatca  
64021 aggtagacat gtaaaaagaa thcaaaaat thgaggtagat thgttaatgt thgcaaatthg  
64081 cthathttta thgcacttat thgtgctact atthathttag thgttatgtt gthttattat  
64141 aaaaccctac tcaataaaga aaaaactthc aaagatttht taaaaaataa thctthgatgat  
64201 actgaaatag thcattagaaa actccaaatt caactthaac gtagcctthg aatathcgat  
64261 atthtaaccg aagagthtaa taaaataaaa gcggatttht thctthttag aacaagaaat  
64321 thcacaatacc gthttagaaaa tgataaacta agacaaagaa thaaagagth agaagcaaaa  
64381 atthgaggcat thattatgaca aaactthacac aaaaacgaaca acaatthttt thcagaaagca  
64441 thacgcgttat thcaaattht ccaaaagaag gthtatthtt thagagatatt acaaccctac  
64501 thtaataatca aaaagcctta thctthttctac thggatcatt aagthaagcgt thtcaagta  
64561 thgaatthaga thttatagca ggaactgaga gthagagtht thattthtcgca gcaatgatt  
64621 thgtctaaatt aaatthacct thttgtthccta thacgcaaacc caacaaact thcatcaata  
64681 cthattctthg cgaatagatg cthtgatag ggacagatag agtagaaatt catcaagatg  
64741 cathtagaaa thataaaaaat gcaaaaatth thactthgtag thgatctthata gthtacaggtg  
64801 ggacagcact thgctthttt gagctthatta aaaaagcagg aggagaatgt atcgaggctt

64861 gttttttaat gaatttgaaa aacttaggcg gtgaagaaaa attacaaaag cattgttctg  
64921 tatatagcgt tttagaatth taggagggtg tgatgagaaa atggtttaaa ttttttatct  
64981 ttatcgtctt aattgctcta ataatctatg tgattcatgg tttggttaaa aatgactttt  
65041 ctttgaaga atttattata agaatttgga acgagcatgt tgaacttg ggttacttga  
65101 tacttttttg ctggagtatt ttagaaggcg agcttggact ttttttgct ggacttgcag  
65161 cccatgatgg aaaaatgcat gtagtattag ctatatttat agctggatta ggcggctttg  
65221 ttggggatca aatttatttt tatataggaa gatataataa acgctatata caaaagaaac  
65281 tccgttcgca aagacgcaa tttgccgtag cccacttgct tttgcaactg tttggctggc  
65341 ctattatttt tatacaacgc tatatgtatg gttttagaac tgtaatccct atgagcatag  
65401 gtattacgcg ttatagcgtc aaaaaatttg ctattatcaa tcttcttagc gcttgggttt  
65461 gggctgctat taccatactt ttagcttggc attttggtaa tttaatccag aattttttaa  
65521 cctgggctaa aatcattgg tatttagctg ccattatgat aatattgctt ttatctttac  
65581 ttgtttcac ctttaacaa atcgaaaaag ctatacttaa agaaaaagg aaaaaaatg  
65641 atatttgaat taagcgataa aaaaattcat agtataaaag cagattttga acttgttttt  
65701 atacaagata aaaattttaa accattcgca aacgaaaaag atttttttaa attaagcaac  
65761 tatacaggcg agggaaatth actcgattta aataataaaa gattattttat agagcttaaa  
65821 agtttaaat atgaggatat aagattagca ctttatacgg cttataaaaa tttagaaaaa  
65881 ttaaataatta aaagtgtaaa acttcttagt atattagggtg attgtgttgt aagaagttht  
65941 gcttctttag ttgagggtgt actttttgga gcctataaat ttgacaaata ccaaagcgaa  
66001 aaaaaagaaa gtactttgaa aaaatttata atctctgctg aagaactaaa tgctaaaaaa  
66061 tttaatcttg atgaagcaaa aataggctct ttgcgtgggtg aaattctagc taatgcgaca  
66121 aattttacca aagatatagt caatgaaatt cctgaaattt acactccttt aaaaatggta  
66181 gaagatgctc aaaatttaac taaagaaaat aaaaatatta catgcaaaat ttatgatgaa  
66241 aaatttcttg ctaaagagaa aatgaatgca ttcttagctg ttaatcgtgc ttctgctcat  
66301 ccaccgctc tgatccatct tagctacaaa gctaagaatg ctaaaaagcg ttagtattt  
66361 gtaggcaaag gtttaaccta cgatagtggg ggtttaagtt taaaacctgc cgattatag  
66421 cttactatga aagcagataa aagtggagct gcagctgcga tggggattat caaagcggtt  
66481 gctgaacttg ctttagaact agaagtacat tgtatcttag gtgcaactga aaatatgata  
66541 ggtggaaacg cttataagcc agatgatggt ttaatttcac gcgaagggtg aagcatagaa  
66601 gtcagaaata ccatgctga agggcgtttg gttttagctg attgtttatc ttatgctcaa  
66661 gattttaaac ctgatttgc tattgatatg gcaactctta caggagcttg cgtttaggtg  
66721 cttggggaat ttacaagtgg tattatggga aataatgaag aattacaaa cgaattttat  
66781 ttaagctcta aaaaaagtgg agaatatgcg actatcttgc actttaacc atacttaaaa  
66841 gagcttataa aatctaatat cgcagatggt agcaatactg cttctagctg ctatgggtgt  
66901 gcgattacag ctggattatt tttagataaa ttcatacgca aagaatataa agataaatgg  
66961 ctccatcttg acatagcagg acctgcttac acgaaaaaat cttggggcta taatagcttt  
67021 ggtgctgggt gagcaggagt tagaatgtgt gtttaatttt taattcatct ttttaaggaaa  
67081 aataaatgag ttttaagctc ggtatagtag gtcttccaaa tgttggaaag tcaaccactt  
67141 ttaatgcctt aaccaaggca caaatgccc aaagtgcaa ttatcccttt tgcaccatag  
67201 agcctaataa agctatggct gaagtctctg atctaagact aatgaactt gccaaaattg  
67261 taaagcctga aagaattatg cattccttga tagaatttgt agatattgca ggacttgtaa  
67321 aagggtcgag taagggtgaa ggattaggaa ataagtttct ttccaatata cgcgaaacag  
67381 aagtaatttt acacattgtg cgatgttttg atgaagaaaa tattactcat gttgaaggag  
67441 gtgttgatcc ttttaagagat gttgagatta tcaatacaga acttatttta gcagatatag  
67501 aacaactagg caaaaaata gaaaaactca ataaagaagc tagagcaaac aaaaagggtg  
67561 caaaagaaag tcttgagata gcaaattctt tacttgaaca tttaaataaa ggtcttccag  
67621 ctagcaccta ctcaaaaaa gaagatgaga tttttcaagc tttaaataaa gaattaagac  
67681 tactttctgc taaagaagtg atttatggag caaatgttga tgaaaatggt attggcgaag  
67741 ataagagta tgtaaaaatt ttaaaagact atgccaataa aaacaatcat gaagtcatca  
67801 agctttgctc caagatagaa gaggaattgg tccgcttaag cgataggaa agtgctgaat  
67861 tcctaagctc tttaggtgta aatgaaagcg gacttgatca aatcatacgc actgcttttt  
67921 ctaaacttgg actgataagc ttttttacag caggagtttt agaagtgcgc tcttggacaa  
67981 ttaagaaagg ttggaaagct ccaaaagctg caagcgtgat tcataatgat tttgaaaaag  
68041 gctttatcaa agcagaagtg atttctttac aagattttat cgcttataaa ggagagaatg

68101 gtgccaaaga agcaggaaaa ctgcgtcttg aaggaaaaga ttatatcggt ttagatggcg  
68161 atgtgatgca ctttagatgtt aatgttttag caaactagcc taaactttca agaaatcttt  
68221 ctaaaatttg aatttgtttt tctacactag caacagagct tgaaccctcg ctttgtttag  
68281 aatttaaaga attttcaaaa tcaagtaatt tcattgcttt atcatcaaaa ataggatcta  
68341 tttttgaaag atcttcaata tcgcttatat caatcccttg tttttcagct tgcgcaacta  
68401 cattgcctac tataaaatgc gcttttctaa agggaatatt tttctctcga accaaataat  
68461 ctgccaaatc cgtagctagc aaatgccctt ttttgcaaga ttttaacata ttttcttcat  
68521 tgattttcac ttcttttaac atagcattta aaataatcaa actatctttt gccgttttaa  
68581 cactatcaa aagcccttct ttatcttctt gcatgtcttt attataagcc aaaggaagtg  
68641 ctttcataat cgttaaaaga gaaatcaaat ttccataaac acgccctgtt tttccacgta  
68701 taagctcgca aacatcagga ttttttttct gtggcataat agagcttcct gttgaaaaac  
68761 tatcgcttat agtcaaaaat ccaaactctg aagcagaaaa taaaatcatc tcttcgcaaa  
68821 gtcttgaggt atgtgtaaaa atcactgcta tatcataaag caaatcgagc gcaaaatccc  
68881 tatcgctcac cccatccata gcatttggca taatgtcttt aaaacctaaa atttgggcac  
68941 taagattacg gttagttgca taactagttc ccgcacacgc acaagaacct aagggagaaa  
69001 aatccgcaag ctctaaacta ttttgcaaac gcttgatctc gcgcataaac ataaaagcat  
69061 agcttaaaat ataaaaagaa aaacttatag gttgtgcatg ctgtaaagtc gtaaaacttg  
69121 gcataatagt tttttgtgc attctagcat gggcaagtaa agtatgaatg agatttttta  
69181 aaagcattat aagctctaaa tgagatTTTT ttgtaaataa tttaaaatca gttgcaactt  
69241 gatcattacg actacgagct gtgtgaagtc ttctcctat ttcactcccg atgagctcac  
69301 ttaaagcgtt ttctatagcc atatgaatat ctctatcttc tatattaaaa acaaaagcgt  
69361 tttgctctat ctcgattcta acttgctcca agccttttac aatagcctct agctcatctt  
69421 tttttaagat tccacaatTT tcaagcatgg tagcatgggc gatagaacct tgtatatcct  
69481 ccatatacaa agttctatct atatttaaac ttgctgtaaa ttcttttaaa agctcattac  
69541 ttgcttcaact aaagcgtccc gaccacatct catttttcat ttatacacct taaattttag  
69601 gtccaaactg gctgtattct acaccctctt ttacatcctc atagcgttta aaattatcac  
69661 taaacatTTT tgccaattta tttctagtag cgataaattc atccttatct tgccaagtat  
69721 tgataggatt taaaagggag ctttctacgc cggttaaagt ttttaggaata gccaaattaa  
69781 atacatcaa attttcaaat tcacattgtg taatacttcc atctaaaata gcattaatgc  
69841 aagctctagt agcttttata ctcatctttt taccacgcc atagcttcca ccgctccagc  
69901 ctgtatttac aagataaaca ttcacttcat gtttgtcaat tttttctcca agtaatcttg  
69961 cataaactgt cggatgcaaa ggcataaaaag gctcaccaa gcaagctgaa aaggtagctt  
70021 gaggctctgt aatccctctt tctgttccag ctacttttgc tgtatagcca cttaaaaaat  
70081 aatacatagc ttgctctttg ctaagcttgc ttacaggagg taaaattcca aaagcgtctg  
70141 cacttagaaa aataatattt tttggatgac ctgcttttaa gcttggttca tgattttcta  
70201 tatgttctat aggataagaa actctagtat tttcagtctt tgaagcatca ctataatcta  
70261 cacttttatc acttcttaaa accacatttt ccaaaagtgc atttctctta atcgtccat  
70321 aaatttcagg ttcactttca ggatcgagat tgatagtttt tgcataacat ccaccctcaa  
70381 agttaaacac tccttcatca tcccatccat gctcatcatc acctataagc cttctttttg  
70441 gatccgtaga aagagttggt tttccagtgc cactcaggcc aaagaaaagt gcaacatcgc  
70501 ctttttcacc aacatttgcg ctacaatgca tagaaagctt attttcaagc ggtagccaat  
70561 aattcatcat agaaaaaatt ctttttttca tctcgccgc ataccaagtt ccaccgataa  
70621 ctgcgatatt ttcttctatg ttgaaaatca caaaaacttc agaattttaa ccattctttt  
70681 catagtcttt attgacacat ttgcacgcat tataaacgat aaaatcagcc ttaaattcat  
70741 ctagtctttt atcattaggg cgaataaaca ttttttttac aaaatgtgct tgccatgcga  
70801 tttcagttac aaatcttata gcttttacgac ttttcaaaga agcaccacaa aaaacatctt  
70861 gcacataaat ttctttattg cttaattctt ttctagcctt cattaaaagc tcatcgaaaa  
70921 gttccttggt gattgcttga tttactttgc cccaagctat atatttgcta gaaggatctt  
70981 gctttacaaa atatttatct tttggacttc ttctgtaaa aattcctgta tctacagcaa  
71041 aagttccatt atccgtacat tgtccttctt cgtttttctt ttcattgctca tagagctcat  
71101 caaaacttaa attatgataa actttttttt ttttttctaa acccaaattt tcgaatttct  
71161 tcatttgcga cctcaattat tttttatata ttgcgactaa attattttcg ctaaacactat  
71221 cacctgtttt gacacaaatt ttttctatta tgccatcttt tgggtgacta acctctatct  
71281 ccattttcat ggcttctaaa accataacaa cttgtcccga ttttacctct tcaccttcat

71341 taatataaat tttaaataca ttaccagaaa ttccagcttg tataccttca cttgaatcca  
71401 catcttgcgt tatatcctct tgagtatctg ctttgcgaac acttttaata tttacatctt  
71461 tatcaaagcc agcgcttact tctacatgat atttatttcc attaactgaa actgtgaatt  
71521 tattctcatc aactccgata gaatttgatt ttgacacagg agcattttta cgtacattaa  
71581 ctttagcttc gccttttaaa tatgctattc ctttttcttt gcaagctgca gcaatgaaaa  
71641 tttttcttc gcttactgct atgccctctt tttcaagcaa gcttttaaca taagctatac  
71701 ttttagtttc atctttatca gctatatcaa tagcaagttc tgtggtaggt tctaaattta  
71761 actgcttagc tgcaagtttt ttaacttcag catcaggctc gacaggagtt ttacccaaat  
71821 accccaatac catttttcca taacttcag caattttttc ccaaggcca aacataacat  
71881 tgttaaaagc ttgttgaaaa taaaattgag aaacaggggt tacagaagtt ccaaaaccac  
71941 ctttttctac aacttcgctc atagcatgaa taacttctgg aaatttatcg agtatattgt  
72001 tatctctcat catttgagta ttagcagtta aggctccacc cggcatagga gaaaatggaa  
72061 ttaaaggact taccattgta gcttcagggt gtaaaaaata ctctcttaa gaatctctta  
72121 aaactgcttc atattttaaa atcttttctt cttctaattc acccaaatca taatccttac  
72181 cttttaaagc atgcatcata gttaaaatat caggctgtga agtaccacca cttacaggag  
72241 ctgctgctaa atctatacca tcaaccccag cttccaaagc cgctaaataa caagctatac  
72301 tcaccctgc agtttcatgt gtatgaagcc ttatatgcac atcttgtggt aaattttttc  
72361 tagccatttt aatggtttca taaattttat ttggatttga agttccgcta gcatctttaa  
72421 aacaaatact atcaaaagga atttcagcag ccaaaatttc ttttaatat ctttcataaa  
72481 agaatacatc gtgagcacct tggcagtttg gtggcagatc cattaagtg attgtaattt  
72541 cgtgttttaa gccatatttt ttaatacatt caccactgaa tttagatta tttacatcgt  
72601 ttaaagcatc gaaatttcta attgtttagt tgccatgttt agcaaaaagc ttagcatgca  
72661 aatcaataag ctctctactt cccgtatcca aggtaacagt atttacacct cttgccaaag  
72721 tttgcaaatt tgcatctttt cctacaattg aacggaattt atccatcatt tcaaaagcat  
72781 cttcattaag gtaaaaaata aggctttgaa accttgctcc acctccaat tcaaaatgag  
72841 ttattcctgc ttcttttagc gcttctactg caggaaaaaa atcctgcatc aagactctag  
72901 ctccatacac agattgaaaa ccatctctaa aacttgtatc cataacatct ataaattttt  
72961 tagccattta ttttccttat atgaaataat taagaaattt taacaaaaat ttgataaacac  
73021 attatgcaaa taattgctat aggtgatata aaacgaataa aaaatagcca aattgtaaat  
73081 atttgacgat ttacaaattt ggaaaatatt ttataaattc gctttttatc cacaaaaaaa  
73141 cctacaaata tagaacttac aatcgcccct aagggaagta aaatattaga ggtcacctta  
73201 tctaaaagag taaaaaaatc ttttccaaaa aaattaaaca aactagaaaa atgaatattt  
73261 aaagacaaaa tacaacaaat tcctaataca aaaacaataa aacctataaa taataaagcc  
73321 ttaatgcgag aaattttata attattaacc acataaaatg ttaaaggttc tatcatcgaa  
73381 actgctgaag taatgcctgc aaaaaaaaga gccaaagaaa aacaaaaggc taaaacataa  
73441 ctaaaaattc caagctcatt aaacaaactc atcaaagata caaatactat tcttgggcct  
73501 tgtacatttg gattagcgcc aaattcaaat ataaaggtaa aaactataag ccccatgata  
73561 aatgagataa gaagattaat caaaactata aaaatagaac ttttgataaa atttattttt  
73621 ttgcttaaag ccgcagaata agtactata caacctatac ctaaacacaa tgtaaaaaaa  
73681 gcaagcccca aagcttcagc aatagaactt aatttaaaat ttgaaaaatc aggataaaaa  
73741 agataagaaa aagcctgctt aaaaccactt tgaaaactca tgcaataaaa caacataaaa  
73801 acaagcatga taaaagact tggcattata agcacattta atctttcaat accttttatc  
73861 aaacccttag atacgatcaa taaggtaaga aaaaaagata aagaaaaaaa taaaatggaa  
73921 ttgcttaaatt caacactgat caaagtagaa aaatcatttc ctgcttgctc taaattttta  
73981 ggtaaataat aaagactggt taaagcatat tttaaaacc agcccataat taccaataa  
74041 aaagaaagaa caaaaattcc acccaaagtg aaaattccac cataacgcca ttttttgga  
74101 tggttttttg caagagtata ataagcattt gctaaatcac ttctacttaa acgtcccata  
74161 gatacttcag ctaaaaaaat actaaagcct atgcttaaag taaaaaataa atacaaaaga  
74221 acaaaaacaa aaccgccgtt ttctgctt agggttgga atttccaagc atttccaaa  
74281 cctacagccc cacctgcaac agctaaaatg aaacctattt ttgaaaaata tgttctcatt  
74341 tttaatccga ttttacttta aaaaagcact aatcataaca acgataactg ccaaggcga  
74401 aacaaatctt aaaaagatat accaaagttc aaaaaatata ctttcatat aaggaccgaa  
74461 caaaatttgt aaagcttctt ttttgattac aaaaccaca aaaacagcag ctaaaattcc  
74521 acccaaaggc ataataatct tacttgataa agtgtctaaa agatcaaaaa cactaagacc

74581 aaaaatttta aatgccgtcg aatccaaaga agacaaaata cataaaattc ccaaggtgta  
74641 aactataatt cctatcaaaa tcaaagcttt tttacgactc attccaaagc tattgattaa  
74701 gtaaaaagca aaaggctcta tcatagaaac tgctgaagta atacctgcaa aaatcaaaga  
74761 tataaaaaaa gctgctccta aaatatgccc tataagtcca agtttttgaa ataaagtcgc  
74821 taaagaaaca aaaatcagac ctggaccctc tttgcttgca tcaaaaccaa actcaaagat  
74881 aaaggtaaaa acgaccaaac ccattaaaag tccgattaaa agattgatga aaatgatatt  
74941 tagagtgcga gtaataaaat ttgtacgctc aggtaaactt gccgaataag tgataatagt  
75001 ccctactcct aaagacaagc taaaaaaagc aagtcctaaa gcttcaagaa cgttagaagt  
75061 gctgatttta gaaaagtcag gtacaaaaag aaattcaacc gccatcataa aaccatcttt  
75121 agtcattgca taaataagca tcaaaacaag taagataaat aaagctggca tcatccaaac  
75181 atttagtttt tcaataccat tttttacgcc cttagatact gtgtaaaaaa caattaaaaa  
75241 aatcaaagta aaacatataa attgacttaa aaaatcgctt gagattaatt ttccaaattc  
75301 agcagaactt gtatcaagat caggatataa atttccgcta atgcttaagt atgcatattt  
75361 aagtatccag ccaattacta aagtataaaa agaacaatt aaaatcgctc ctatcatggt  
75421 aaaacctgca taagaccaag cttttttatt tgaaggagca agtttttcat aagcattaac  
75481 aggatctttt tcaactaatc ttcctatact aagttcagcc aaaaagataa caaatcctac  
75541 acccaaagtt aaaataatat aaagcaatat aaaagcagag cctccacttt gtcccactaa  
75601 agtaggaaat ttccaagcat ttcctaaacc tacagctgaa ccagcaactg ctaaaataaa  
75661 acctattttc gaaaatttag aattcaaaat ttacaacctt gtattaaaaa attattttta  
75721 agtattatta aagcaaaaaa agttttaatc tttaatgaaa gtgataaaaa tacttttaaa  
75781 atgtgaaatt tagtaaatth caataaaatt aaagatattt tttgatatat tttcaacttg  
75841 attttaaatc ttaagtaggg atacgcaagc cgaactgggt taaaattaaa acattaaaaa  
75901 tctctataaa attttaaaaga aaggttgtaa aatgaaaaaa atcctttttc tatttttagc  
75961 tcttgcaagc actgctttcg cggctgaagc taatgcacct gttgaacaag aagctatcaa  
76021 tgtatggata aaagcgtttt ctgtttttagc ggcaggttta ggacttgggtg ttgctgact  
76081 aggtggtgct atcggatggt gtaatactgc agcagctacc atagcaggaa cagctagaaa  
76141 cccagggcct ggaccaaaat taatgacaac aatgtttatt gcattagcga tgatagaagc  
76201 gcaagttatt tacgctcttg taatcgctct tatagcactt tatgcaaatc cttttatagt  
76261 ttttgcttaa tctataaaaa agctctatth agatagagct tttatcttct tattttttgc  
76321 ggttatgggtg gaattggtag acacgccatc ttgaggggggt ggtgcgctcc gcgtgtgcga  
76381 gttcaaatct cgctaaccgc accatttata ctatgaatta aacttatcaa atatataaaa  
76441 tagaatttag aactatgcaa agctgaaatt aaagctcgcc ccattaaaaa attcatgtta  
76501 aaaaattttc ctaaattttt attttactcg aaaaaattag aaaaagttga tataaagaat  
76561 ctatttttaat gttattaaaa ggatatttta aaggatgcat aactcatatg gctttaaaaa  
76621 cttgaattac ataaatattt tataggagtg tataatgaat aagattgaca atattgcaaa  
76681 ttttttaaat aaaaaatcta aaaaatgtht agctataaat gggctctggg gtataggtaa  
76741 aacttattta tggaaacaag ttgaaaagaa actttccgaa gttgataaag ataaaaaagt  
76801 tgtctatata gatctttttg gcaaagaaag ttataagcaa atattagaag aaatagtttt  
76861 taaattatac ggaacttata attcttttac aaaaaagct tctaattgtt caagtaatct  
76921 tataaaaaaa gcaagttgtg agtttataaa aatagaacct gatgctatth tttcttttgc  
76981 aaaaaaagaa gactttaata atattattgt gtgttttgat aatatagaaa gaagatctga  
77041 caatctttct ttaaaagaaa ttttaggact tgtaaattta cttaaagaag aaaaagaatg  
77101 taatgthtth atgatttttc acaaaggtga attagaagaa caagacaata attcaacct  
77161 agataataag aaaaaagaaa ccaaacaaga tcttaatagt ttacttcagg catatgaatc  
77221 aaaagctaag gaagagcaag ctaagcaaaa taataaaaac tggatcaaaa tatacaaaga  
77281 aaaaattatt gactgtgaaa taaccataag aaataatgat gaagtagcaa aagcaattat  
77341 aaaagagaaa atagatcaat atactaaaat tacggatgag ataagaaata ttattgaaaa  
77401 tattattttt gaaatacata aagaacattg caatggcaat ttaagattat tatttcacgc  
77461 attagaacac atagattatt ttaataagca ttgtttttta aaatttagag aatatgatga  
77521 taacaagca tttgcaattg ctctaaaatt aaattatcaa tcattaatat ttcaaactaa  
77581 aaaatatctt tctattaaaa tagagacaat cgacttatct tcaggcttct atcatcttta  
77641 tgaaaaatac ctaaaaaata tgttttattt aagtaaaaaa gaaaaagaac aagtaagata  
77701 tgatttttaat caaactctaa aaactaattt ttatttcaag cttcaaaact gcaaaatgga  
77761 acatttaaca ggtaatttaa gtgatgagca atttgtaaaa gttgttgaaa attcactctt



77821 agaaatagac ttttattcaa aaggtggaat tatttattat ctttatgatt tttatcaaga  
77881 tttattttca acctacacac aaattacaaa gaaaaaatta agcaatatag aagaaaaaat  
77941 caataaacat tacatagaag ctcttggtgc agaagaatta gaatttgatt ttcgtgataa  
78001 ctataaatct gataaagatc ttttaaaatt attagaaaat gaaaaatgga agcgttatta  
78061 tgaagacacc aaagaaaaat acataacaag caagtatgaa aatattaatg cttttattaa  
78121 tagctgtgaa aatatagaaa gtagttttaa ttctgaagca atcaagcaat atatTTTTTT  
78181 taaaaaagaa gaattaatac aactatTTTaa agaaaataac gatttttgta agaaatTTTT  
78241 taatcatttt tctaaaaata tgaatataaa tcataatTTT aatgatgatt taaacaataa  
78301 tttatTTTcga gcttattTTgg attttttgga tttagatgaa aataaaaataa aaaaaagtat  
78361 tgttttaaaa tatataaatt cacgaaatag tgtattaaga aagctactaa tagaataatt  
78421 gctaactttc aaaacaaaag cttttcattg ctttttgtaa ttttttgTTa aatttctTTg  
78481 aatttaaaat caaaggattt aatacacaaa tgcaagaagt tgaatatgca gcagaagaac  
78541 tgagaactaa tcttgatttt tactctataa aatttagaaa cctataaat cctacttaag  
78601 tagaagcaag gataaacaac tcttgaatta ttttcaataa aaagactTTa aactttttta  
78661 gcagcaaaga atgtgagcga tgatttatca caaaagggga tatcaaaccg tagttttatt  
78721 tggatagaag tttagataat aaaaaaatgt tttagagtat gtataatTTT acatattTTa  
78781 acctacaatc aaattcTTTt tgttattatt ttaaaattag attatcaagg aaaaacatgc  
78841 aagaaaatcc acttgaaaaa caattcttaa atcatcccct atTTTcTaaa attcagaatt  
78901 tgaaaaaat cgaactaaat tctaaacttt atttagaaga tagcgtcatt ctaaaaacaa  
78961 actctcaagc agaaaatgaa atTTTtagaac ttgcaaaaaga attaaaacca tggagaaaag  
79021 gacctTTTaa aatagatgat ctttttatcg atacagaatg gcaaagctTT gTTaaattca  
79081 atatcTaaa accctTTatg aaagaaatTT ctcaaaaatg tgttgctgat attggTTgta  
79141 ataacggcta ttatatgTTt aaaatgcttg aatttaatcc aaaaaaactc ataggctTTg  
79201 atccttcgat caaatatcgc ttacaatttg aactcataaa tgctcTTgcc aaaacttcta  
79261 taaagtatga gcttttaggc gtggaggatt tgccaaaata tgagTTgaaa tttgatgTga  
79321 ttttctgtct tggagtgatt tatcacagaa gtgatcccgt aaaaatgcta aaagattTaa  
79381 aagcaggctt aaataaaaat ggaactgtat ttttagacac tatgtatata gaagatccaa  
79441 gagagattgc tctagttccc aataaaactt attctaaaat tccaaatatt tattttgTtc  
79501 ctagcattag tgctTTTaaa aattggTgcg aaagagcagg attTaaagac tttgaagTtc  
79561 tagctacaaa aataacagat gaaaacgagc aaagaaagac agattggatt gattcTTTt  
79621 ctttagaaaa ttttttagat ccaaacaata aaaaccttac cattgagggt tatgaagcac  
79681 ccaaaagagt ctatgttcgc ataagggtat aaaatTTTta tttactaagc cgatatggta  
79741 tcaagaaatg ttttgaagta gataatataa aacaccaaag gcacaaaaat ggcaaaaaaa  
79801 gatactTTTg aagaatatgc acagcttgaa gaatatgtat ccgccgagga tatttctcgt  
79861 gtaagagctg aactTTTtaac ttgtccggag ctcaacacct ctttagcagg aaccatcata  
79921 gagcttgata aaaatTTTgc aaagtcaata cttatcacta caagcgatat ggttTtagat  
79981 gaacaagggt tagtttttga tgctTTTatt tttgctgctg caaactatgt cgcacaagct  
80041 tcgatcaata aagaattctc tgttTttatc ggttcaaaat gtttctTTTa cgctccactt  
80101 aaattaggcg atgtttttaga acttgaagct catgctTTat ttgatgaaac ttctaaaaag  
80161 cgagatgtaa aagttgtagg gcatgtaaaa gagattaaaa tgtttgaaagc aactatacaa  
80221 gttgttagca cagatgagca tatatTTTaa ctcaaagcag ctccattTaa cacagtcaaa  
80281 gcagcagaaa attctgattc tccagcgagt acggtaaact ccgaagccat agggctcgca  
80341 ttatccgcat ctttacgcaa ataaatcatc aaggagtcat tTtaatatct acccaatTTt  
80401 tggggcactc tttgtgataa gttccgcttg catcataata ctcacgacaa tcatcataaa  
80461 accgatttga aatgcctctt tcatttTcaa agcatcctga tattcTaaa agcaaagcta  
80521 gcattaaaaat atatTTTctc attacctgcc tTtaaaatct atTTTgTTTg cgccattTat  
80581 aaggctctat tggattatca tctttcTaaa gacctagTTt atTTTctgga gcctTTTctt  
80641 gctctTTaat gtaagcatta gtataatatg tatccgcca agcatatcct tggctcacta  
80701 aaaattgatt gatatctata tcattaagct ttacaatagc aacaattcta ccataattat  
80761 ctttTctTTt agaaaaaata taaactTcct tgtctTTTaa aatTTtatca agtgccactt  
80821 ttgattgctt gccaaaatTT tgctTcaatt caggtgcatc tatgccaaaa aatcgTatct  
80881 tgctagTTTt attattaaca ataactTcaa tagtatcacc atcaatcacc ctaatcactt  
80941 gggctTTTaaa actaggattt tgtactatat aatTTTgcac aaaagcaatc attaaagcaa  
81001 aatcaaaaa tgctaaaagt ttttttaggat cgcttgcaat ttttctTaaa tTaaataatt

81061 tcttataatt tattctcatt gtttccttga attttgaaaa atatgccata attttaacaa  
81121 aaaaaaggag atggaatgca aaatgttata gcaaatTTta aaaatTTtatg caagattcca  
81181 cattgcagtt atgaaacagg acaaatgaaa gaatTTTtaa gctcttatgc taaagataaa  
81241 ggtTTTaaag tcagtgtaga taaagcagga aatattcatg ctatcaaagg aaatcctaaa  
81301 atttgtctcc aaagtcatta tgatatggtt tgtatgggag aagctccaaa ggtagaagta  
81361 tatgaagaaa atggatTTTT aagagctaca aattcaagtc ttggggcaga taatggcata  
81421 ggaatagcca tcatgatgag cgctatgact gaatTTgaaa atctggaatg tctTTTTaca  
81481 aatgatgaag aagtcggatt aatgggagca aattcactcg agcacacttt aagctccaaa  
81541 atgctTTTaa attttagatca tgaaagcgat gatgaaatca tgataggTTg cgcaggtgga  
81601 gtggatatag aagctaagtt aaactTTaac actTTTaaagg caaggggtaa aatTTatgaa  
81661 cttcaagcgc aaaatTTTca agggggacat tcagggatta atatcataca caatgaaaaa  
81721 aactctatca aagaaatggc taaatTTatc aaagaaaaca aaggagaaat tatctctttt  
81781 gaaggtggag aaaggataaa ttctatacct aaacacgcaa aagctTTtagt gcattTTTaaa  
81841 aatgaagtaa aaggcaatga gtggataaaa tgtgaattta aagaagaagg cgaattTgaa  
81901 atttgcgac aaagcaaaaa actTTTaaat accatcaatg cctTTgcaca tggagTTtagg  
81961 gcttatgata aaaatTTTaga tatagtGcaa actagtatca atctagccat tTTaaaaatg  
82021 gaaaatcaag aatcaaatt tgaactTTTt gcaagatcta atatattaga tggTTTaaaa  
82081 caaatagaat ttgaaacTTt ggaatTTTtT aaagcTTTtT attataaagt aaaaagTTTt  
82141 aatTTTtatc ctcttTggga aggcaaagct aacgcactta gtgataaggt attaaaagct  
82201 cttaaaaaag tttcgcccaa tgctagggtt tcaactatcc atgcaggatt agaatgcggt  
82261 atcatagaaa agaacaaga actTTTtatgt gcttctatag gaccaaatac ccacaatcct  
82321 cactcaaccg atgaacactg tgaattTgct tcagtagaaa aaatatctag agttgTTTTt  
82381 gaagtgttaa aagacaacgc ttagtTcttt tgcttcgctc cttgcaaaaa tgcgcttgag  
82441 taaaaatacg ctaaataagg agcagcacc taccactata agataaacac ctatatattc  
82501 tttataaaaa gcattgacta taaaaggagt tagaaaacct aaaagtgcac aagaaatatt  
82561 ataagcaaaa ctaagtccgc tgaattTaaag ttcgctTTTt aaaaatTgag tcataaaaaac  
82621 aggagcaaaa gtaataatac cttgagcaaa acaagcaagt aaaaaataaa ataagaaatt  
82681 tgcatacata aaactaaaa gcataccaaa aaacataaag gctatactaa aatagaaca  
82741 aattctataa cttccccatt tgctagccaa aattcctTga atcagcgctc ctaaaataac  
82801 agccaaaata gcaaaatTTt gtatccataa agctgaagtt ttgTTtatcg ataatagctc  
82861 ttcaaaatat tttggaagta tcattaaagt cgctacacca ctggTTTaaa caacggTcat  
82921 taaaagcat actaacatac ttgTTTTata ggTTTTaaTt gcatctTTTt aaggaaaatt  
82981 taaaagctta ttttctTTTT ttattctTtT aaattcagga gtttactgta gTTTTgtTct  
83041 caaaaataag gcaaaaaatc caaaaaatcc tcctatgata aaaggaattc tccaagcata  
83101 ttcttcaacc tcttgtacgc taaaataaga tcttattcct aaagtggcaa gatttcctag  
83161 taataaaccc acagtcaaag tcgctgaaat aaaacctaaa gctaaaggaa tttgacgccc  
83221 tctaacaat tcacttacat acaccaagc tccgcttact tctgtcccta cggctaagcc  
83281 ttgtaaaata cgaattaaaa ataaaaccaa tgtagcaagt atacctatac tctcatagct  
83341 tggtaaaaat gccaaagcaa aactaggcaa aaccataaaa agcatagata tgtaaaaaat  
83401 atTTTtacgc ccatatctat caccaaaatg cgccataaca atagatccaa aaggacgCGc  
83461 caaataagca gcaccaagg ctatataagc atTTTattTg atccaaaaag tatcattTtTg  
83521 aggaaagaaa actTTtagcaa aaatatccaa aaaaaaggca aaaagcacia aatcataaaa  
83581 ttctaaaatt ccgccc aaag aagcataaat tatatTTTtTg tttTTTTttt gcatactTTa  
83641 tcctgatagc ttttataaaa agggcaaaag ccTTTTTtaa tTaaatTTTt ccacctTcga  
83701 taactacatc atcggctTTt acatcatctc caaatgagc tttcaaagtt tcatcataag  
83761 ctttatggaa aaattgtTct tctcctagtt ttacgattaa gttatcgata aaatctTTaa  
83821 gttctTTtat gcctTTTTTt acagcaggag caattacatc tttattgccc aattctTTaa  
83881 tagccatTTt aaattcagga tgttctTTTca cccatgcaaa aagcaaggta ttatcatgac  
83941 tTaaagcatc ccctctTtga tctattaaag cagcaaaagt ttcagtattt tgatcatatt  
84001 tTaatgTTTT aatatcagga tattctTTTtTg taaaatacgc atcagcggtg gttcctTTat  
84061 tTaaaagcaa ggtTTTtatct tTtaaTctt ctacactact aatattacta tcttgaggca  
84121 cagccacgCC taaagctacc ttcatataag gcaaacaaaa atccactTgC tctgctctTt  
84181 caggtgTTTT agTaaaatta gctaaaataa tatcaactTT atTTgattTT aaaaattcca  
84241 ccctattTgc agcttcaacc aatacaaaTt gcaccttatt tTcatctcct aaaaattcct

84301 ttgctatacg tttagccaag actatatcat aaccttgatt tgcgcctttt tcatctacat  
84361 aacccaaaagg cggtttatct ccaaaaactc ctattcttac tactccttct tgcttgattc  
84421 tttcaagaga atttgaagca ttagaatctg aatttcctcc acaagcagcc aaaaatactg  
84481 caacaaaggt cgtaaaaata cttaaaagca ttttttcat acttttcctt tcttggtata  
84541 aaccataaatt ttttttgcaa aaaaatgcaa aagcattata ctttaaaaaa aggcatattt  
84601 caatTTTTTT aagataatTT tatctcctct tgtgtaaaaa agtaatatca atataagcca  
84661 taaaaattta agtataagat tgttataaatt tactttttaa actatattaa ggagaagatt  
84721 ttatgaaaaa aagtattgct ctaactctag gcgctatatt tttcttttcg gcgtgcagca  
84781 actcgcttga taaaactacg gttgcaaaat acgaagaacg tcttaacgct caaataaacg  
84841 aaactcttaa agatTTTcaa caagatatgg gcgtaaaaaat agaaatttct aatttttctt  
84901 gcgaaggtga tggaatgttt cttaaatgTT caagtcctaa ttttagtgTT tttgcaaaag  
84961 acagcactca aacagagcaa aaactcttcg aagcaaaaaa ttttagaatt tattctaagT  
85021 aaatttacac aggagaggaa caaggcctaa tctctttgaa ggattattat gataatctat  
85081 tgagtaaaaa taaaaactta aaaacaaatt tcactttaga aggatTTaag cttggagaaa  
85141 aggtagtcag tgatattacc acaagcttat ctcaaagtga gccaaaaatt aaagattata  
85201 tcagcaaaact tagctcgggt gtcttcacaa tttcatttga aaattcactt tttatgaaaa  
85261 atagtgatta taacaataat ttcaatatga aaataaacia tcaagactta aatttcgata  
85321 tgaattTaaa ttttgattac aaacaaagct tgcttgattt ctttgaaaaa gcaggaatca  
85381 aatacaacac acaaacctat gcaatagatg aaaaagctgt agaagaactt ctagatcaac  
85441 gaggatttgc tcaacctata caagaaagtg ttacctTaaa taattttaaa atcaattcct  
85501 ctttagatac ccaaggtgTT tttgaaaatt atatcacaat cgctaaaggt ggtctagaag  
85561 ctctTaaaat tcaaagtcaa aacgaagaac aaaccttact catagataaa gctttattgg  
85621 ctctaaatga aatcacaaaa gatacagtct ataagcttga tttagaagct aagtttaagc  
85681 ctattgcgTT aagtgattat cctaaagagg gtattaatgc ggtagaaaaa ctaactgtta  
85741 ataactaaga ctttacagaa acaactTaaa tactttttgg tttcatgatg atacctataa  
85801 tgcttgaggc cgcaacaggt ttttaaacaa tatggagaga aatctccatt actcttact  
85861 tttgatttta ttttaagccc agttttatat attttttagat actttttatt tcttgattta  
85921 aagactTaaa aaggacgaaa ttgaagattt tattctctcc aagcgaaagc aaaaacgata  
85981 cttgTaaaga aaaacctata aataaaaatt cttttatatt tgaaaattta tttgatttta  
86041 gaatgcaagt tgcaaaaaaa tatgaagaat atataaaaaa tgctgacttg aaagctttgc  
86101 aagagctttt tgggataaaaa aacgaaaatg aaatttctaa ttttcaaagg gatttaaaaa  
86161 actctcccac tcaaaaagcc ataacgcttt atagtggagt aagctatgag tattTaaatt  
86221 ttgatatttt agataaaaaa agtcaagaat acatcctcga aaatactctt attttttcaa  
86281 atctttttgg agtagTtaa gcaagtgatc atttgccttt ttataaattt aaacaaggtg  
86341 cgaaaaataa tgatTTTgct atagaaaaat tttacaaaga gcatttttagc aaagcttttag  
86401 atgaatattt agaaaatgag gaattgctcg atTTaagagc aggtttttac gataaatttt  
86461 acaccccaa gcgTaaattt agcacttata aatttataaa aaaaggTaaa gtagtcagcc  
86521 attttgcaa agcttatagg ggaattttac ttgctctttg tgcaaagatt aaagctaaaa  
86581 ataactga tattTaaac catcttccat ccaattTaa cctTaaaggaa attcaaaata  
86641 agggTttaaa agaagaatt gtgctTgaaa ttttagatta gttttTaaGT gcaatttatc  
86701 ccaccctgcc ctcttattta aataataaat ttcaaaaaat attgTttcaa tatagatata  
86761 aattTaaaaa atattTgttt tattttgttt aattttatga aattaaaaat taatacctaa  
86821 aatcatctct tttTaaGaaa attattatag tattataggc gagaataaag gagaacaagt  
86881 gcagtatttt tttgtatttt taattattgt gtttttattt attgtgttta tgcttatcat  
86941 gcgttatgaa aaaaaactcg agctttTaaa ccaaagtata caaaacataa aagaagaagt  
87001 taatggactt aaaaacatca ctcaaagtaa tcgctctttg attgaaaaaa atcgctctga  
87061 tattgaaaat atcaataaat aatttcaaac aaaaaacact ttaagctcat aagctagctt  
87121 gtgattTaaC attaaaacia atgtcttttc acaagctagc tcttttttat ttttataaac  
87181 gaaacttttt aaaaaatcaa gaagTaaaca gcttgtcatt ttcccttgta aaattatata  
87241 catagtattt tgagaaattc catacttata acttgctccg ctaggaaaaa catcaagatc  
87301 aaaattTacg ctatcattat tagcatcgta atctaaaatt tcaattttta caaaactagt  
87361 gttTaaatct gtaattttta atgtttcaa aatattcaat ttttgatttt tttccacct  
87421 tatgctttct ttttgttcgc aagtattTgg tataaaaaa aaacgatctt tgTtaaagac  
87481 tcttgaaaaa gtattTaaag gggtTaaatt tatattattt ttaagggtct catcatcttt

87541 gattactaaa ggcggaagat ctactcctcc atcctgtttt gtttgacttg ttgtaaaaat  
87601 ttcctccact atgatagtat tttcttcgtc ttcatacaca aacattttta aaatttcac  
87661 aaattcaaaa ctatgatcac taaattttta aagcgttacg ctatcggtta taaagtcaat  
87721 cttgtctcga ttaggaatth tatctttgac tataaatgct ctattgtaaa aatattgatt  
87781 ttctatttca tactcatcac ttttaccttg aaaaaatatt ttcatacaca aggctttcgc  
87841 tataagctcc aaaggacttg caaaaatcgc tttgctagaa ttttgctcca aagcatttga  
87901 aatttgcatt ctacacgctg aacattcagc actgactaca caggctttac tttcatcaat  
87961 catacttgct ttcttaagcc ctacactcaa agccctgtca taataatccg tttgcatgct  
88021 taccgccca aaaccacaac atgcattagg attactcatt tcaacaaaat gataatttgc  
88081 ctttagaagc tctctaggct ctttaaaaac cccttgcat tttcttgcat ggcaaggatc  
88141 gtgataggta atgctataat taagcttttt cttgctttct aaaagctctt ttaagtttgt  
88201 aaatttataa aaatactcac tagccatata aatacagag gaaatctttt gagctctttt  
88261 ggccactct ggctcatttt gcatatgaaa aaaatgttct aatctattt tcaacattgc  
88321 cgagcaagtt gcctcaggaa tgataatagc atcaagcttt tctaattttt tttcaaaata  
88381 ttctatattt ttcttagcca aaatttcaac acttttaaaa tcgcctgtaa aaaattgcgg  
88441 tgcgccacaa caaacttgct ctttcattaa atctacattg atttttactt ctttgcaat  
88501 cttaagcaca gcattagctg tatctatata aaaataattc gccaaacaac ccacaaaaaa  
88561 gcctatggtt ttttctccac cattgttgat aaaatcaggg tttgaattta aaaaactttt  
88621 tttattaaaa cttgtaagca atcttccttt ttttaaaaaa ggcatagaaa atttagcctt  
88681 catgcctaca tttttacctt gacctgaat tttaaaagca cagctttgaa atacatagcc  
88741 taatttcgca gctaaatcta aaattttacg cttcttagg aaaaagaaga taattttttt  
88801 ataccatgct ataccgaatt ttttagctat atcatagcgc acttcttcga tagcattatc  
88861 cactctaat ttacttgggc aaacttcgac acaattagta cacaaaaaac aggattcaaa  
88921 aatcttttta gcctctttgt ttaactctag ttttcttcc ttataggctg ctaaaagatc  
88981 taaaaaaccc ctaggacttg tagtttcatc acggtttact tcatgaatag tacaactgg  
89041 tatacatttt ccacatttaa cgcaagcatc gcttatttga ctaaacttca tcaccacccc  
89101 attaaactgt ttagaaaag acttttttat cttcacttat atttttcata taagcatcaa  
89161 aacacatagc tatatttcgt atcagcaaaa cacctgtttc atttaccaa ataaagtttt  
89221 catttaaatc aataaattct ttgtattctt ccaaagcttc taaatcttct ttgaaatact  
89281 ctttaaaatc gatttttaaat tctttctcta tggctttaat atctagtcta aaatttgcca  
89341 tcaaatccat aattacagct tttctaagct catcatcata gcttaactta accctcttt  
89401 caaaaggcaa tctcccctcg ctaatagcag cttcatagct tggcatactt ttaaaatttt  
89461 gcgcataatg actttgtcct tctcctatac tagtaagtc tatgccgatc aaatccgcac  
89521 cacccttggg agtatagcct tgaaaattcc tatgtaaagt cccattttcc aaagctttta  
89581 aaagctcatc ttcttctttg gcaaaatgat ccatacctat cttttataa ccattttgag  
89641 tcaaaaattt ctcaaaaat tcaaaaattt caagcttgac atcaggactt ggcaaagtat  
89701 tttcatcaaa ttttctcata ttttcttta gccaaaggcac atgagcgtaa ttaaaaatag  
89761 ccaaagatc cggattttaa agcatggctt tttccaaagt ttttagtaaaa ctttgcaaac  
89821 tttgaaaagg cagaccatag atcaaatcca tattgacaga ttttatccct ctatctctta  
89881 ctaattttta agcgttttgt gtttagctcaa agggttgaat tctatgaatt tctttttgta  
89941 ctttttcatc aaaatcttgt actccaaaac tgatacgatt aaaaccattt ttggttaaaa  
90001 catcagcttg ctcttcattt aaaaaacgcg gatcaatttc acaactgatt tcagcatctt  
90061 tggcgaaatt tccgaaaatg gatttaattt ttaaaaatcaa actttctagc tgttttagcac  
90121 taaaaaaagt aggtgttcca ccaccaaagt gcatttgcac tacttccctt ttagtatcta  
90181 taagggtgct taaaatatca agttcttgaa aaagatattt taaatatctc tccttacttt  
90241 cttctttggc agtataaata acattacagc cacaaaaata acaagcactc ctgcaaaaag  
90301 gcaaatgaaa ataaagcgat aaagctttgt tttgcttttt taaaatttct atatattctt  
90361 cgtatttgaa atttgtgtta aattccactg cagtaggata agaagtataa cgcggccccg  
90421 ctttagaata tttcacaaaa gctttataat ctctcattat tctttaccct ttctaccatg  
90481 gcttgcatat ctacaaacaa atttggatgt tcttttttga tatctgcaag caatttttca  
90541 agatcaatgc tgatctccat aataccctct tgtgccttgc gttttatctc atccattgcc  
90601 actatccaca catcgctaaa atcaatagga atttgctgat aaatcgcttt ttcaagacga  
90661 agttcgaat tctctttttg agcttgtttt aaattttcta aaatattttt aagactatth  
90721 aaagaaacaa gtgtatgaat ttgatcattt tcatccatta taaaccaagg ttcaggagaa

90781 tcaaaactac catttttaag caccaagcat ttttcgtttt cattctcact ttgcttcatt  
90841 tcaaataatag ctctatcttc ttttttcatg cctaaatfff ggctaaattc atcaatgcgt  
90901 ttttaagcaat tgctatattt ttcaagttct ttcactaaaa actccttatc ctatcttctc  
90961 taacttatga aattatataa aatcttgttt ttccttgctt aaaaagcaaa gcaaggcttt  
91021 taccacataa aggcgatttc ttgcttcttc aaaaatcact tttgaatgct tttcaaagct  
91081 ctcttcgctt acttcataac ccctataagc aggcaagcag tgtaataaaa tagcatcttg  
91141 atttgccgca ctcatagcct cttcatcaat aataaagcca tcaaaatcct taatfttctt  
91201 ttctttttca ctttcttcgc ccatagaaac ccaagtatcg gtaataatta catctttgcc  
91261 ttttatggct tcaaatttat catgggttaa aagaatfttt gctcctgaaa tttttgcttt  
91321 ttctttggca aattctaaaa tttcactatt gatttcataa ttttttggca atgcaacact  
91381 aaaatcaaat cccaaaattg cagccgtaat aagccaagaa ttacacatat tgttgctatc  
91441 acccacaag gctactttag ctacatcatc ttgcattttg ccacattctt ttatggttag  
91501 caaatcccct aaaacttggt ttggatgata aagctcactt aaagcgttga taaccggagc  
91561 tttggagtat tttgcaaatt ctattaaact ttcatgctta tttactctca tcatcacaaa  
91621 atcaaccatc gcccfaatca ctctagctgt gtcttttata ggctcacctc ggcttaattg  
91681 caaatcatta ctacttaaaa ataaagcttt tccaccaagc tctgtgatag caagttcaaa  
91741 agccattcta gttcttgtag agtttttttc aaaaatcatt gctaaagttt tatcttgcaa  
91801 aagctttttg ggattttttt taagctcact tgcattgctt acaaggctta aaatftcata  
91861 tttagaaaag tctcttagtg ttaaaaaatg tctcattttt ctccttttaa cattttggct  
91921 aattctttag cgtgataagt gataatcagc tttgcacccg ctctttttaa agctatcatt  
91981 gtctcatata aaactftttc ataatcaatc acccctgcac gaccgctac ttttagcata  
92041 gcatattcac cgctcacatt ataaacacac aaaggcaaat tagaatgaag tgaaatttct  
92101 ttcaccacat caagataagc taaagcgggt tttaccatta aaatatccgc tccttggtgt  
92161 tcatcttcta agctttcttc taaagcttct tttccatttg caaaatccat ttgatagctt  
92221 tttctatctc cataacttgg cgttgaatct gctacatcgc gaaatggacc ataataactt  
92281 gaagcaaat tagtagaata tgccattata ggtaaatttt caaaacctt ctcattcaag  
92341 gctttacgca aggtttctat aataccatcc atcattccgc taggcgctat catatcaacc  
92401 cctgctcttg catggactaa ggcttgcttg gctgaaattt ctaaagttgc gtcattatct  
92461 acgcttttag ttttaggatc aattatcca caatgtccat gatctgtata ttcacaaaag  
92521 caaagatcgc tgataataaa aagatttggga aattcttttt ttatctctct tatacttctt  
92581 gcaataagtc cctcatcatc catcgcacca cttccgcagc tatctttttt atcattttca  
92641 agaacaccaa aaagaataat cgcttttatg ccgagctcgc ttatggtttt acattctttt  
92701 aaaatftcat ctaaactcat ttgaaataca tcaggcatag atgaaatftc ttttttaatt  
92761 cttttgccat ttacaacaaa aagaggataa ataagatcat ttacgctaag agtgtgttct  
92821 cttaccatag ctcttaaact ctcatthaagt ctaagtctgc ggaatctttt aaacattttt  
92881 tgtccttttt ttgctacaat gttatcataa ttttgattat aaagagttagt aaatggatat  
92941 aaaaatttca gaaattgcaa atctacctag caaatgggggt agttttcaaa ttcaaagctt  
93001 caaagaagga gaaaaagagc acttatgtat atttataaac actccacaag atatcctaaa  
93061 ttttaagaatt cactcagaat gcttaacagg agatgcttta ggaagcttaa aatgcgattg  
93121 cggggaacaa cttgaatttt cattaaaata tatagaaaag catggcggaa tggtaattta  
93181 cctaagacaa gaaggacgcg ggatcggact ttttaataaa gtcaatgcct atgctttaca  
93241 agataagggt tttgatacca taaaggctaa tcatcaatta ggttttaaaag cagatgaaag  
93301 aacttatgag atagtggaat ttatactaaa acattataaa atctctaagg ttaatttact  
93361 tactaacaat ccacaaaaaa ttcattctat acaagataag attatggcgc gcgttcctat  
93421 actcataaac cctaactcgt tcaatgcaaa ttatttagaa ataaaacaaa atcaaatggg  
93481 gcatttactt tgaatttggga ttttttaaat ttaattttat ctgattttta cgaagaagat  
93541 ttttagagcca agcttaaaac ctataaagag cttctaaata aatttaaccg cattcataat  
93601 cttaccfaat taaaaaatat agatgaaaat attttagaca gtattgaaat tcttaaatat  
93661 tttgattttt ccaaagcaaa aatatagta gatattggta gcggtgctgg ttttctgct  
93721 attttttttag cttttatctt gccaaagtaa tttcatcttt ttgaaccaa tccaaaaaaa  
93781 gctgcatttt taagaagcat caaaatagaa tgcgatttaa caaatftaac catacataaa  
93841 gaaaaagttg aaaattacaa gagtgctttt aaagcagata ttattacctc aagagctctt  
93901 atggatgtaa aacftttaat aaagctttgt ttaaatataa gtgatcaaaa aacaatfttt  
93961 atactgtgga aaggcagtga agtttttgac gaagtagaag gattgaaaga ttatgatatt

94021 tttgaaaatg gcttaagaag atattgtggtt ttaaaaaata ctcaaagtgg tataaatacc  
94081 acttcgtgat tactgcacta catcggcact aaaaacaata tctactaaag gccatgaaat  
94141 tccaccatgt cctggtgcaa catcgcttag agctttttaa gcttgagaac tattttttaa  
94201 agcatgtaaa tcaagctgtc ctttggctac aaatttatta ttttctatag tatagcttaa  
94261 aggtatcagt gtgctctttt tgtcgatagt tactctagct gagattacgc ctttattctc  
94321 acctgcaact acatctttaa aaactacttt aatatctgaa ttgccaagca aactagggaa  
94381 aaatacttta gcaaggttat ctgtaatgat ttcattgccc tcaccataa aaacactgct  
94441 tggatttacc actgctctag caccttttaa atagttcgcc aaagtgctag tattttttaga  
94501 aaatttatat ttaacatctt taaattctcc acctactcct accatatctt cagtcttata  
94561 tccttcaaaa ctaactttca agctatcttg attgaaagaa acagcactca aacttgttgc  
94621 aagtatcaaa gaggctgcaa tactataaaa catttttttc atttttttat ctttttttaa  
94681 taaaattttg atttgcgtga gaattatagc atatttttat aaaaaataa ttttttctaa  
94741 atagtaattt ttattaccaa agcatacctc gaaaaaatag ggtcagaaaa tatcctccaa  
94801 aaacaaaaac caatcccaaa acaaaagcta aacaaaaaac tcttgaacca ctttttaaga  
94861 atttttttaa gtcgatttga agtcctaaag cagccatagc aaaaacaata caaaggggtgc  
94921 aaagcaattt tccaaaagat ataatatcac ttgtagaaat tccaagaaaa ttttccttgc  
94981 ttgctaaata agtgtttaata acaattacc ctaaaaaaat gaacgcaaaa taagggatac  
95041 ttatgctttt tgctgttttt cactgcttg aatgctgatt tttagcaaaa aaataagtta  
95101 cgatcaataa aaaaggcaca agcaaaatta ctctcatcat ttttataata atggcaatat  
95161 ttgaagcgct ttgatcaaaa tttgccatat cttttgccat ttcagcagct cctgcaacat  
95221 tagctacctc atgtaaagtt gcaccataa atatacccat agcacgctga tcaaaataag  
95281 gaaaaagatc taaagaaaaa gccataggat ataaaaacat aaaaacaagc ccaaaaatta  
95341 ctactgtgcc aacagctaga attcctttaa atggatcact ttttaggctt gactctaaag  
95401 ccaagacagc tgctgctcca caaatagcac taccagcacc tactagcata gaagtttctt  
95461 tatctaactt aaaaacctt acacctataa tcaaagataa aataaaaaata aaaaatataa  
95521 ctatcataga aagcataaat ccttttaacc ccacgcttag aagttcggtt aaagtaatat  
95581 taaaaccata caagataata cctagtctta aaagtttttt agcgctaaaa tgcactcctg  
95641 cttgtaaatg atgttggtat ttaaaaaacc aaggtgaaag caacgctcct ataataatag  
95701 caaaagcagc tgctgctaaa tgggttgat ctttaatact ttgaacactt gaaagataca  
95761 ttgcaaaaaac cactatacag gctgtaaaaa tcaaacctt aaaatttgaa atcagtatat  
95821 ttttataatg ctctattttt tttatcatat tttttctcct ttaatttgca attataaaat  
95881 tacaatttaa tattttcttg ccattatagt catttttata ctataataaa aatatattat  
95941 ttttaatttt ataataaatt tttttaatta aaaaaaacgg ataaaaatct caatgaaaat  
96001 caaagatatg gaaatttttt tagatctttt aaatacccaa agccctactc atacggccaa  
96061 taattttgcc attactcaac ctaatgtttc tattattatt aaaaatttag aacaagactt  
96121 gggcggagta ttgtttgaaa gactaggaaa aaagctttta cccactccaa aagctttata  
96181 tttaggtaaa atttggctaa agctagtgca ggattattac agaagcttag aagaacttag  
96241 tgatgaaaaat acccttttag gggaaatcaa tatagcagct actcaaagca tagctgaaca  
96301 ttttcttgct cctattttat ttgattttaa atctgaattt agcaatgtta aaatacattt  
96361 tcaaacgcaa aattcaaaag aatgtttcaa tttattaaaa aatggagata tagaatttgc  
96421 catcattgaa gcagaactta atcctacttt aatagagcac gaaggattaa aaatgcaatt  
96481 ttggaaaaag gatgaactta tagttgctag cagtgataaa aatttaagcc aaagagaatt  
96541 ttatatcgat gaattgcttg accaaaagtg gattttacgc gaaacaggct caggacttag  
96601 agataaattt ttaaacgaaa taggcaatgt gtccaaaaaa cttaaattct ttctagagct  
96661 tgatagaatg tctgctatta aagaattagt cattcaaaaa aatgccattt ctattttctc  
96721 taaaaaaagt atagaaaaag aattaaaaaa ttcgatttta tatgaggtaa aattaaaaaa  
96781 tattaatctt tggcgtaatt tttataccct aaaaagaaaa aattataaatt ttaatagagc  
96841 tttggaaaaa tttgaaaaaa tattccaaca ataaaaacta aattttatac aaatgttaag  
96901 caaaatttag ataaaaatcca aggcttatat aaaaatcaag gaaatctcaa tgaatgccaa  
96961 aaccaagat atggaacttg aagagctctt taaagaaaat gaaaaagatt atatcactta  
97021 tgaaaaatta gtaaaatact tcggtaagca acctaattca gctactgcta aaaaagtcca  
97081 aactttaatg aaaaagtaca aagtgcaatt attttcggct gctgaaattg cacaaatgaa  
97141 aaatatagaa gatgcaaaaa gattgcaaga agaaaaacaa aaattacaag atactagcct  
97201 tgaaaacgaa tttgatattg ccaatgaaaa tgatttacta gaatggagca gatcggattc

97261 tcctgtgcgt atgtatthta gagaaatggg acaaattgca cttthtaata aagatgaaga  
97321 aatcgaatt tccaaaaaaa ttgaacttgg cgaagatatt atcatagatg ctttttgttc  
97381 tgtgccttat ttgattgact ttatthttaga ttatcgtgaa ccactgatca atagagaaag  
97441 aagagtaaaa gaactthtta aaagctthtga tgatgaagaa aaaaacgacg ataagcttga  
97501 tgagttagaa gatgaagatg aagaaaatga tgaagaatta gaaaatgaag aagaaactcc  
97561 taaaaaaaca agcaaaaaag aggatgaaag aactthtaaa gtcatagaaa aatthtaagc  
97621 tttagagaag gcaaaaaaag attggthtaa ggthttctaaa gacaaagaaa gcggagatga  
97681 aatthtagat aaacttggca ttgctthttaa gaaaaatatt ctaaaagaaa aattaatgga  
97741 tctgggtcca acttctaaac tcatcagtga aattgtaaaa tcaatggaaa ccgcctthaa  
97801 aagtgatgag gaatthgaca aagaatthaa acgcctagaa taccgcttgc cgatgtthttc  
97861 cgaagaattg aaaagtcgtc atgccaatat ctthaaagat attacaaaat taagcaaaaga  
97921 agaaatcacc gaaagagcac ttgaaacaac tatggtaagc acttatatgg agataaaaaa  
97981 gctthttcaa accaaagaag caagtgaaaa aagthttgat ttggagaaag agcgtthtaa  
98041 agaaatthta gagcaaatca agcggagtaa aaaaatthtt gatgaagcta aaaccagaat  
98101 ggctaaatca aatthtgcgtc ttgttgtaag tattgctaag cgttatataca accgcggctt  
98161 acctthttta gatcttattc aagaaggcaa tataggtctt atgaaagcgg tagataaatt  
98221 tgagtataaa agaggatata aatthttctac ctatgcaact tgggtgataa gacaagctat  
98281 ttcaagagcg attgcggatc aagctagaac cataagaata cctattcaca tgatagaaac  
98341 tatcaatcaa atcaataaaa tcatccgca gcatthtcaa aaagatggaa aagaaccgga  
98401 tgtaagtgtt atagctaaag aagtaggact aagtgtggat aaggthtaac aagtaattaa  
98461 aatcaccaaa gagcctatct cacttgaggc acctattgga agcgaagatg atggcaaatt  
98521 tggagatthc gtagaagata gaaattcgct ctgcctatg gatcatatth taaaagatga  
98581 thtaaaagaa caaattgatg aagthtttga tcagctaaac gatagagaaa aagctgtcat  
98641 tctgatgcgt thtggcttaa tggacgatga aagtgataga accttagaag aaataggcaa  
98701 agaatthaat gttacacgca aaagagtaag acaaatagaa agctctgca thtaaaaact  
98761 taaacatcca aaagtgggta gaaaactthaa aaactatatt gagggthtga aataatthaat  
98821 ccaactcctt thcctcttht aatthttctca catgtthcaa aaatatcact thtccgctgt  
98881 gcgctthttaa atcctthaaag tcttctatat caaattctaa acaaagcata gatgaagtag  
98941 gaaaagaagt taaacataaa gaacctaaat atthtccaag thccatthaa gtaggattat  
99001 gccctactaa thaaactthca thtatthttct tatcaatagt thgtaaaatt tgatatatth  
99061 tagacaaatc agcaagatat aatthcatct taaattgaa thtttcttht tcaagthtat  
99121 aaaatthggc ththththtth gctgtcttht cagtgcgtht agatgggctt gaaagtataa  
99181 aatcaaaatt thtctthtga aatththaaat thtaaaaaag thtttctthaa thtthctthac  
99241 ctctthtact thactthccta thcaaatctt gtactthctc atththtaac gcctthtgcath  
99301 gcctthagtat atathattht thcaaattht thctctthaac thccctthaaa aatathcaca  
99361 aataaaacca aaaatathgt cathaccatgc gacaththaca cccataagca atggggcaaa  
99421 actcattagc aaaatagcga ctataagthc thttgtgcta cthttatcaa gaaaagcata  
99481 atacccatc aaaacacaaa thgccccact thgctctaca agatthaatca thtgccthaag  
99541 ctgattthaa gaaaaatata cathaaaagg actcaaaatt gagcacatth thccacctat  
99601 thatacaaac aaaaagaagc gaaaagcacc caaataaggc thtaaaatac gaccaaattg  
99661 aataaaact atcatatth agataagatg gththaaatt ccatgtataa acatcgagct  
99721 thaaatthtgc caataagctc ththtaaaaa caaatatth aaccaagta agctataata  
99781 thcataagga atthgthaaat aaaataaaat atththaaaga atcagthaaa thacaacca  
99841 aataaacctt thaaattht atgthattgt ththaaattc acataaaatt cacataaatt  
99901 cathaaatt thagtthaaa thaaataag gaaaaactth gaaaataaaa thttacggca  
99961 thtatagccat thtatctagc thththaaac ctgatathat aatathctct aacgagctth  
100021 caagthattc thaaagaatt thtaaaaaata atththcaagc thccataggc atagthacaaa  
100081 gagacaggca thctthtga gthththtth gtgatggaac ggaatthaga thtgaaagtg  
100141 atggatcatg gaaagagata gaaagcaag thctthcctt tgatththaa thtctacctc  
100201 caaatthaac aatathatt caaaataaat thccthaac caaagctagg gaaatcgaaa  
100261 gaaaaatcaa thattataaa atcaagctth cthacaatat agaagthgat atthgattth  
100321 atggthacgat ththataca gaathacgat atthgaaatt thgtcaagta thccatath  
100381 athaaaatt atathcttht agaaatctgt ththaaagcaa aagthctagg atththaaat  
100441 thtagaactt thaaattht atcacttht thaaatcgct ataththaa thttcttht

100501 cgagtaaaat ttttagcaagc attgaaatth tttcttttaa agggaataaa aactcatcta  
100561 cttccttttt aatttcactt aaatttggct cttcaagcat atcaaaactc atcatgtaat  
100621 caaacaattc ttttaactttt aaaaaatcat tctgtgagtt tgtatagctt tcattataaa  
100681 tcaaaccatc agccctagaa cccgccaat agactttgat acgattgata agttctgatt  
100741 ttgagcgaat ggcatgctca tattctttta aacgatcttc aataagggta attttttcaa  
100801 atcctatatac aaaataatac gcactcaaag ctttcgcagc ctgataagtc gcttgataaa  
100861 cttttcttc atcattaaaa ctcagaatth ttttctttcc taaaagtact ttatttaata  
100921 cagcgtaaaa atcactttct tccaccaag cactatthct tcttaaggca ttgatagctg  
100981 cttcattgac caaggtttca agtccagcac cactaaagcc tacgcttgct tttgcaatth  
101041 tatttaaatc gatattgtta tttttacctt tcatataaat ttctaaaatt ttaagcctat  
101101 ctttaaaatc cggcaaagat aaaaaaatgc gtctatcaaa acgccccgag cgaagcaaag  
101161 ccggatccat taattcgatt ttattagttg cagcaattac aataacaccg ctattatctt  
101221 caaaaccatc catttgagtt aagagttgat ttaaagtgtc atctctttcg acattagaca  
101281 tttcaccctc tgccttacc actgcatcaa tctcatcgat aaaaataata cttggagcca  
101341 tcatttttagc tctagaaaaa agctctctta ctcttttagc tcccattcct acataaatth  
101401 caacaaagct tgatccactt tgataaaaaa aaggcaccct tgcttcacct gcaaccgctt  
101461 tagcaatcaa agtttttctt accctggag gtctaccat taaaacacct tttggcattt  
101521 ttacaccaa ttctttatat tttttgggat tttgcaaaaa gtccacaagt tcgctaagct  
101581 ccatttttac ttcatcaaca cccgctacat cattaaaagt gatattggaa atcacaggtt  
101641 ttatattgga actttctaaa tttgtagtag aagtttgagc ttgagtttta ctagatatag  
101701 gatacttagc caattcctth ttacgcgtaa aataaacaag gcttaataaa agtgcgataa  
101761 gaaacacaaa caaaacaaaa aatgtccata aggtattgtc ttttttgatt tccacgggaa  
101821 cttttgataa aagcacttta atatctatac catcttttac gatcacataa ctctcacctt  
101881 tagctttaag ccaaatttca tccttatcaa tcaactgctth ttcaattaaa ttttgactta  
101941 ataaactttg gtaaagattt tcatctatgt atttaggttc atttttaaaa tataaaatth  
102001 caaaaagcaa acacaagata agaaaagata tcagtataat ttttttatth ttcatthtta  
102061 gccctthtaa tccgcaaaat tatgcttht tttgacttca tatcgctcta atthtagcca  
102121 ttctthtgct atatctthac tgctthtaat ttttatthta ttaaaaaact gatcataacc  
102181 ctcaaaaaa ccatctthttt gattthcaac caaaatttca agtggagttt taacccttht  
102241 tctaaattga taattattgt tttctataat agcctthtaa gtgtthtaatc tttctthtagc  
102301 cacggcacca tttacagtat ctttcatagt agctgaatgt gtattgtthc tagggctaaa  
102361 aataaaagca tggatatggg taagtgggaa ttcttgaaaa tgctthaaag cctcatccca  
102421 aagctcctta gtttctcctg gatgtcccac gataaaatca gtcccaaaag catatcttht  
102481 gctagctatg atattaaaaa gcttcaagtc attatctgta tgcgatcttc ttctcataat  
102541 gcgaagcatt ttttcgcttg tatgctgcaa agcaatatgc aaatgccgct ccatccattt  
102601 ttcatctaaa atthccaaaa aactctcatc aatttgagcg ggttctaggc taccaagcct  
102661 tatgcgthtt atgcctgaaa tttgaccat tttttgcaaa agttcgccta gtgtgtthcc  
102721 atthtttaagt ccatatgagc ctatattgtt tctgtthaaa accacttcgc tatagccatt  
102781 tgctcctaaa atthcaacct gctthtaaaa agccttctca tcaacacttc ttgattthcc  
102841 gcgcacacta gggataatac aataagaaca agcaaaatca cagccttctt gaattthaac  
102901 aaaggctthg gtgtgattth catactcaca aactatatct ttatcgataa aattthaaatt  
102961 tccaagttca tagaaacttg tttthaaacc caaaaattca ttgattthtat cttgtthtga  
103021 tgctccaagc acacaaaaa tctgtthttt atccaaaagc tctthacctt tactcacagc  
103081 accacaacc gtaagtataa ccctaatgcc cttttttgct atggagthta tataagattt  
103141 tatcccacta tctgcaccat tagtaacggt acaagaatth actacgatga tttgtgctth  
103201 ttcttcatca tttacgattt cataatctth tacatagctt tthaaaagtt ctgtatcgta  
103261 tatattagtg cgacatccaa aggtthtthaaa aaaaacttht tctthcaatt actatcttht  
103321 gtatgaaaat gcgtagaatt ataatgagtc caaaagggg cttgattthaa atthcctaaa  
103381 tataaattht gagatgggta agctatthta atatcctcat gcttgthtthaaa ttctthgata  
103441 atctctthgc taatagcgct tcgaagtatc aatgctgcat aagaattthgt catataccaa  
103501 gcagatattc tcatcccca gtgtthcaaaa aagacgaaaa atctaggctc tactthtagga  
103561 tttcttatgc tgtattcatt ttgcagctth ttcatthgtth tthtagctag ttcagtataa  
103621 ccctthgcta ggcggtthgac aattthcttca actatagctt gcgctthttc tatattggaa  
103681 tcaaaagtaa cactaatatc tataccatct aaaaactgtht tcatgccatg atgagtataa



103741 ttagaaatta gatttgtaaa aacataatta ttaggtatga aaacaatagc ccctgctcta  
103801 cgatTTTTac tataagTTTT aagtGtaata tcttcatata aagtGatagc caaaaaagaa  
103861 atatctataa tatcgccac ataagtagta tcatTTtgaa aaactttcac acgatctcca  
103921 actctaaagc ttccacaaa aacaatcaca caccatccaa gcatagacat aaacatatcc  
103981 ttcattggcaa tagccaagcc cgccgatgca aaaccaagta tagtaacaag ataagttata  
104041 ttttctatat aggcaaaaag caaaataaga aaaatgatat taagattgat aaaattgata  
104101 atctttgttg ctgtataata tctttcatta tcttttatgt atTTTTtagc aacaaatTTT  
104161 aacataaaaag caatagctac aacaataaca atagctacga ctatattaat cgctcttaaa  
104221 ctttgcgctt tgatttcagc acttactctt gtgatttcat catcaatctt tttttcatag  
104281 acagaataag aaacgctagc aaattttaaa gcttgatcaa actcttcaag ttttttatct  
104341 gatgctTTTa atgcttctat attttcgata tttgattcaa gattgactaa ttctTTaagc  
104401 tctaaattct tttctctaatt tttttctacc aaattcttaa aatcattaaa tttaaaagca  
104461 tattcttctt tttctcctct taatTTTTta atatgagaaa aagctccgat aattgcaaaa  
104521 ggattagtaa gtttagataa agtttctata tcttcaggcg cactaagact atgagcaaaa  
104581 ttttaattctt tatattcttt aagcacattg agctgttctt ctaaagttgc tatttttctg  
104641 ttttaattcat cttgtaaagc cgcacttctt atTTTTTTta attctagttt taaaataata  
104701 agctcatcat ttatatcttg gtatttaata aaattttcat agcgtacatc ccaatactg  
104761 gctccaataa cagtgtctaa attgcttatt ttttcattaa tattattaat aatagtgCGa  
104821 tttatatcag caaaagcaaa aagactaaaa cagagcaaaa gaaggatttt tctcattgaa  
104881 attctttcag agtttccaat accacttctt tagcaatatc atcttttatc atccccttgc  
104941 ctaaagaatt tgcaagaatg aaatttaatt tttgattaga gctTTTTTTta tccatgaaaa  
105001 aagcttcata aaactcgttg atattttcga ttttataatg cgttggtaaa ttaaattgaa  
105061 gtaaaatTTT ctctattctt tcacattctt ctttgTTtag caatcctaatt tttaaagcca  
105121 agcgatttgc catattcatc cctatagcca ctgcttcgcc atgtaaatat tgcttatagt  
105181 ctgtaaaatt ctctatcaca tgagcaaaaag tatggccata atttaaaagc attcttaaac  
105241 ccgactcttt ttcatcacac tccacaactc ttgccttaag ctccacgctt ttagaaatga  
105301 tttgagtaaa aatttcgTTT tcgcaagtcg catttaaaaa actttcttca tcaattgctt  
105361 ctataaatcc aagcaaatct ttatcaaaaa ttgcagccat tttgataaat tcagccatcc  
105421 ctgCGgctaa ttctcttcta cctaaagttc ttaaaaaattc actttcaciaa tacacagctt  
105481 taggttgata aaatgtgcct attaaatTTT tcccaaaaagc attattttacc cctgTTTTgc  
105541 cacctactgc agcatctacg caagctaaaa gcgtagtagg gatattgata aaatcaattc  
105601 ctctttggta aatgcttgcg gcaaatccac ccatatcgct aatcactcca ccaccaagc  
105661 ttatcagtat actttttcgg ttgagtttag aattaaacat ttggTTTTaaa attttttcca  
105721 aagtaactaa atttttatat tcttcacat cttctatcgt cgctataaaa agctcttttag  
105781 cttaatTTT agacaataat gtttttaaat gaagtcctga aatTTtagga tttgaaagta  
105841 taaaaacctt agcatctaatt tctaaactat ccaactcatc tatataaac ttagggcat  
105901 tttctTTTaa atctacattt atttgcattg ttctactttt atTTTgaaat taaatctatt  
105961 ctagcaaatt agggctaattc attttcttag ttctaggtta taaaactaag aaaatttaaa  
106021 ataaaaatct tttttgaaac actaaaaata agctcgcaaa aaacagcact ttattgcaag  
106081 ctttaaattga ttttcattct acaggtatga aaagttgata atgTTgcctc atTTtagaat  
106141 aatgcctatt aagattggtg cttaaactct tgctaaattc tccatctaaa agccctTTTT  
106201 caaaactaac aaactgtaat aaatctgcgc ggtaggataa agataaaaata ggattttcat  
106261 ctttttact gataatctgg atattTTTTat cataaagttt agataaaactt caaaataact  
106321 cctccatata cgtagtattt tgcaaatag gattgtaata atacaaagta acatcaaaat  
106381 caagctgctt actaagatct gtaatcacat ttgcattatt ttcaagttcg gtttcatcag  
106441 cacttaaaat aacagcattt tgaatatttt caaattttcc ctgcctatt tttaaaacag  
106501 gaattttcaa ctcaaaaaaa gtttttttct cttgttcaaa atgTTTaaaa tctgtaagaa  
106561 taatacctat gtcattattc tctaaaaaag aatTTaaatt tttaaaatcc gtgttaaaaa  
106621 aatcaaaaaa tatactttct tgctcatctg aaagctgctt cattctatcg tatagagtgc  
106681 ctagcttagg attaagcact cttataaaaa atttcttagc attgcttctt ttaactaatt  
106741 gtaatgtagt atctaataat ctttcttgca catcttact cattTTTTc atatcaataa  
106801 gagtaaagat attgcttcca aaaggcaatg gaaattgcc tactttacct ctgatattat  
106861 gaaaaatact ttgaagaaca acaggatcac ctacaatcaa aatactatca ttgggctgca  
106921 aaacaaaaga tggcttaaca aaataaattt tagaattcct ataaatgagc actatacgcc

106981 atcttttttg ctgaatggag ctaatatgtc tgtatgcaaa aatcgatcct gcaggaatth  
107041 tgacctccat aacttcccca acaccaatc caacacaata agccgttaaa gcaatatcag  
107101 gcaacaaatc cataaatctt cgactcaaag tcattctagc atcggctaaa tttgcatgga  
107161 catcgttgat attcaaacc caaaaatcca ttatttcaat ctctaaatth gtatctaaag  
107221 aacgcaaagc ttcgtaagtt tttttagttt caaattcatt ttgcatatag ataaaagctt  
107281 gtttaaaaga tttattcata agattttcaa ggcgagctgt gctagtagga tcaaaatgat  
107341 gaatttctat atattcgtta tttgtgcca aatttatgct ttcttcattt tgacaaacta  
107401 tggtaaaaa ataccccaag cttttttcaa aacaaagcct ttctaagaaa tgctttgcta  
107461 aaataccatc gattattatt aaaatatgat tcattttgca ctccaaaaag gaaattataa  
107521 caaatggaat ttaaattaaa gcataaagac aacctagcta gagtatgtga gataacaaca  
107581 gctcacagca cttttgaac ccctatthtt atgccagtag gcacagtggt cgctgtaaaa  
107641 agccttgatg ctatcgatct taaagaaaag cttaatgcaa aatcatcct agcaaatact  
107701 tatcatatgt atttacgacc cggttctaaa atcgtaaagc actttggttg tttgcatggc  
107761 tttacaaatt ttgatagaag ttttcttact gatagcgggt gttttcaagc ttttctactt  
107821 tctgctaatt ctaaactttt tcaagatggt atagaattca aaagccacat agatggttct  
107881 aacattttat ttactcctaa aagtgtatta gacaccaat atgattttaa cagcgacatt  
107941 atgatgatac tggacgatct tatcgctctt cctgctacaa aagaacgcat taaagtttgc  
108001 gtggatagga ctataaaatg ggcaaaagag gcgattgatt atcacaaaca aatgcaaatt  
108061 caaggactag gtctaaaaca aaatathttt ggaatcatac aagggggaac cgattatgaa  
108121 gaacgcaaac gctgtgcttt agcccttaat gaaatggatt ttgatggact tgctatagga  
108181 ggacttagtg taggtgaaga aaatgctctt atgtatgaaa ctgtggaaaa tttaaacctt  
108241 tttttagatg aaaatcgccc ccgctatctt atgggggttg gaactcctga agatttggtt  
108301 gaaaacatag aacgaggagt ggatagtttt gattgtgtta tgcctactag gaatgctaga  
108361 aatgggactt tttttacaaa tttcggcaaa tttaatatca aaagagctga atttatcaac  
108421 gatcatgaaa gtattgataa tgaatgttca tgctacactt gtcgtaatth ctcacgcgga  
108481 tathtaaac atctthttta agccaaagaa ttaaccttht ttcgcttggt tagcttgcat  
108541 aathtacatt attathtaac attagtagca caagcacgag aggcgataaa aaagtctgaa  
108601 tthaaaaaat ttaaatacga atthttacgcc aaaaggctaa ctaatggtat gtgatgagaa  
108661 tthaaagtaa tttcttgcaa ataaaaatth aaatacctta tatatggatt tthtagggca  
108721 aaaaatthtg atthtaaat cctacaacct aaaaactaaa aagggaaatt ttagtgttht  
108781 tggatthtgag gatgataaaa tathtaaac tgaagatact caathtaaac cthttcttht  
108841 aatgatthtt ttaagtacca ttcgcactat tthtagggat tataaaaatg aaataacca  
108901 cthtgagtac attctagagc gcaaaagaaa tatactthta aagggcaatt tgattaaaaa  
108961 tthtttcaag aaaagcttht tcctaaaaca aaaaatcaat aaaaacttht aaatatctc  
109021 cthgcttgat gaagctthta gctcactagc gggaacgagt ccgataaaa aagctthtaaa  
109081 gccgattaat tthgctgttg gaattgcatt aaaaaacaat aaagaaatga ttactagact  
109141 gaatgaactt catttgctaa tgagtgcgat taaaaatgaa aaaataaatc aaagcttata  
109201 tthtttaagc atathatctg caatathttt acctcttaat ctaatagtgg gthtttttggt  
109261 tatgaatact aatgatthgt tthtaagcaa tgtcaagaat gcaacttggt atgthtttgc  
109321 tcttatatgt tthathttat taagtggctt gathathttat cgtaaaaaaa gaaaaaaga  
109381 attagaatth gaagataaga tcttaagcaa ataacctaat tthaaagaaa atthtttatat  
109441 aathcatct tthaaaaatc aaaaaagatg cgctcatagc tcagctggat agagcatttg  
109501 attgcggttc aaaaggctag aggttcgaat cctcttgagc gcaccattac tcttaatat  
109561 cattcatttc aathtatctc acttaatagc tthttataaa gaaaaatcta attatattac  
109621 acctgcttaa aaaagaattg atathgtgt ttgactaaaa tthtagccct gcttcaagtt  
109681 tggtaactaa gtctatatta tctthaaatt ttagcatat aagagccacg cgatattctt  
109741 cggatthgcc taaactatta tccccaaat ctatattgat ggctatactc tctttacctg  
109801 tgactthttag tctccattg tgatcaataa catgatctth tccataagcg attagcaag  
109861 tgttagaata atctccaaa gtataaacct tagcaccatt ggctacaatc aattggttat  
109921 tagthtctta tgcgaatacc acttacagct acaccactag ataaaaatc atggtthttga  
109981 gtggctgtgt tathgtacc atagatatgc aaaccactc cgtattctgt aggtatgtat  
110041 tctcttataa gctathttgc atctthttta gccataataa ccatgatcgc tthaccagtt  
110101 tthaaatcgc tthttcataa tagaatcca taataaagtt tctatcaaa aacatagcct  
110161 aatcctgaa gcaaggctaa tctgtcttc atatagaagt tataattacg ccaactthtg

```

110221 tggctcatta aagaattatc aagctcaata tgagccatat ctaaacaatc ccctttgctt
110281 gagttttaac tattctcatc tccacttgag cttttgctca tcatatacaa atgatcacta
110341 aaactgttta aaaaaccatc aataaaacat tctcctaaat ttccctcaca attactaatt
110401 aaagatagca tacccaaagc ataaaaaagc tcatgagtga aagtgaaaaa agtatcaaat
110461 tgatttccat ttttaggtaa agcagtgagg taaatattaa tatgccctaa atattctaca
110521 tcttctttag taaaaaaccc ttctgctata tctataaatt cttgtctgat agtatctata
110581 ctttctcctt gcaataccct attaaacaca ggattaactt ttcccttgat ttcattctctt
110641 tataaatctc tccaagaatg aatatgtatc ttatttataa aacctcttaa tcataagcca
110701 aacctacttt tattcattaa aaaaacaaaa taacaattaa agtatgcgcg aaaaactttt
110761 acatataaat ctttatctta taaattcctc ctgagcgcac tactttaatt ttttagttta
110821 ttatcctcac ctcaccctta aattcatcaa cattgaagta agagtataag ctttatcctt
110881 gtttgacttt aatataaag tcttaatat attttgcgtt aaagcttcta aaatctttat
110941 gagttcaaat ttatttaaag tcttaaaatc attaagaagt tttaaataaa gtcctaaatt
111001 cattttaaaa tctaaatcca tgtattgatt ttcaatattt tgaatctttt tttcatggat
111061 ataaaaatga ttatccttag aataaaaata agaattttaa tttttatcct tcaataaaag
111121 attataaaaa tttaaaagac tttctttgct gtttaagtct ataaaattaa gataaaaatt
111181 cttttcttct aaagctaatt ttaaagcatt aagattagta aaagaagtat taagattttc
111241 atcattcttt aaggcataaa cgacattttc ttgttcttgt ttttgagtga tagcatattg
111301 taataaaggg tttttatagt atgtatcact attgattaaa acattgatat aaaaagcttc
111361 tttgcttttt tgagttaatt gaagtaaaga taaaagcgta gaagggatat aaaaagaatc
111421 aagctttaag tttaaatact tatcataagt atttatataa gttaattctt gattaaaatc
111481 taaaggctgt tcttttaaat ttaaagcat tgttccgcct aatcctaata aagctagatt
111541 tttaaaattc tctaaagctt ttcttttttc taaatcgatt tgaagtgttt tttgcattgt
111601 ttttcctttc ttttgtggtt taatctttga tattgtgttc ttttagcataa gctagtatct
111661 tagctctaag ttctcttggg aaattatata tataaatagc agggattctt ggatcaagga
111721 gtttatctaa atatcctctt ttataaatcc attctaactt ttcaggtgta aaataataag
111781 gagcattagg atagccttga ggaggagtga gggctgag tttggcactt aataactaggg
111841 tatccatagt cagtttagca gatctctcat ctctttcgtt tc

```

//

```

LOCUS      DMACINML_9                64928 bp    DNA        linear      16-DEC-2020
DEFINITION Campylobacter species strain strain.
ACCESSION
VERSION
KEYWORDS   .
SOURCE     Campylobacter species
  ORGANISM Campylobacter species
            Unclassified.
COMMENT    Annotated using prokka 1.13 from
            https://github.com/tseemann/prokka.
FEATURES   Location/Qualifiers
  source    1..64928
            /organism="Campylobacter species"
            /mol_type="genomic DNA"
            /strain="strain"
  gene      complement(128..847)
            /locus_tag="DMACINML_01462"
  CDS       complement(128..847)
            /locus_tag="DMACINML_01462"
            /EC_number="2.7.7.38"
            /inference="ab initio prediction:Prodigal:2.6"
            /inference="similar to AA sequence:RefSeq:AHW91867.1"
            /codon_start=1
            /transl_table=11
            /product="3-deoxy-manno-octulosonate cytidyltransferase"

```

```

/protein_id="Prokka:DMACINML_01462"
/translation="MIIIPTRLASTRFPEKILCDIGGVPMFIATAKQVSSVDEVCIADV
DDEKVL EIAKRYGFNAVLT SKNHESGTD RINEACKKLN LKDD EIIIN VQADEPFIECE
NLAKFKEFANSCLKQEA FMASCYKDISKDDASDPNLVKVVC DKNNFALYFSRAKIPYE
RADYEESFKGHLGIYASVKALREFCTLENSALEKA EKLEQLRAIENGKKIKMLQINT
DSMGIDTQEDYERALRIYLGE"
gene complement(844..2256)
/locus_tag="DMACINML_01463"
CDS complement(844..2256)
/locus_tag="DMACINML_01463"
/EC_number="4.2.3.1"
/inference="ab initio prediction:Prodigal:2.6"
/inference="similar to AA sequence:RefSeq:AHW91866.1"
/codon_start=1
/transl_table=11
/product="threonine synthase"
/protein_id="Prokka:DMACINML_01463"
/translation="MLLVESRNINNKVDFKNALVNP NAPQGGLYSPLSLPQFDGEKYA
DLSYKEFALKLIESFEFGHEALFDKALKSYEFDDKNSPIALKKIKDKTYINELWHGP
TRAFKDMALQPFVLLNEFSQNEKIL IICATSGDTGPATLKS FENLENIKVLCMPYK G
GTSAIQELQMRALDKGNLKVFAIRGDFDDAQRTLKNLLAKETFKDEL SKVGYGLCAAN
SVNFRILFQIIYHYASLKLYHEFKEEIEILVPSGNFGNALGAYYAKLMGAKISKIK
IVSNANNILTDFFTKGEYDLRDRSLKKTISPAMDILISSNIERLLFSKFSDLRTNELM
NLLKTEKYFKLEKEELQSLQEDFEADFCTDEECMNF IKESKILIDPHTATCFKMLDTS
KPSIITSTAETKFTPSMVKALFGRECKDEKADFELLAKEFKVDIKDLLELFDLKNA
DEKVYEIGDIEGEILEWIKK"
gene complement(2243..3175)
/locus_tag="DMACINML_01464"
CDS complement(2243..3175)
/locus_tag="DMACINML_01464"
/EC_number="2.7.1.130"
/inference="ab initio prediction:Prodigal:2.6"
/inference="similar to AA sequence:RefSeq:AHW91865.1"
/codon_start=1
/transl_table=11
/product="tetraacyldisaccharide 4'-kinase"
/protein_id="Prokka:DMACINML_01464"
/translation="MNEEKYQLWLDNYFFKPSFFQKCLAFILLPLSLLYGLCAILNT
CFRQKIDFKKPIISVGNLSFGGNGKTPICKAIAREFEGVFIVLRGYKRKSKGLVVKVKN
ENTILAQVSQSGDEAMEYAFEKVKGVIVSEDRVVG IQAFELGAKIVLLDDAFSKFH
IQKFDILLESKIKPYFNFTLPSGAYRLPKFYEKKADFIACEGRDFIRYSYVKNPKAV
LITAIKPFRLYEHFIKARACYFFKDHYEFKKEELQALLDKHHCDTLM LTFKDYVVKV
DFGFKCQIIELNIELKENFKEKLYQYIRSFNVAS"
gene complement(3175..3921)
/locus_tag="DMACINML_01465"
CDS complement(3175..3921)
/locus_tag="DMACINML_01465"
/EC_number="6.3.1.5"
/inference="ab initio prediction:Prodigal:2.6"
/inference="similar to AA sequence:RefSeq:AHW91864.1"
/codon_start=1
/transl_table=11

```

```

/product="NAD synthetase"
/protein_id="Prokka:DMACINML_01465"
/translation="MDYEKISQALCEFIQCKVQDSGLSGVVLGLSGGIDSALVATLCK
KALGENVFALLMPTKFSNQENLNDALDLCQELNLKYKIIIEIQDILEAFKQSENTDEL
SRGNFAARIRMSLLYDYSALKKALVVGTSNKSELLLGYGTYIGDLAYAFNPIGELYKS
EIYELARYLNLNEKFIQKAPSADLWIGQSDEKDLGFSYELIDKGLKALENQDVKVLEN
LDRKLLDMLQSRIKNNAFKRNMPETIASLNK"
gene 3995..4591
/locus_tag="DMACINML_01466"
CDS 3995..4591
/locus_tag="DMACINML_01466"
/inference="ab initio prediction:Prodigal:2.6"
/inference="similar to AA sequence:RefSeq:AHW91863.1"
/codon_start=1
/transl_table=11
/product="metallo-beta-lactamase family protein"
/protein_id="Prokka:DMACINML_01466"
/translation="MQILKQACGPYETNCYILNTSKGDFIIDPGLNALSFIKQYAKKP
LAILNTHGHYDHVWDNARVKKEFDIPIYIHKNDEFMLQDPFGKGFEPNADVLIENED
ELEISNTRFKFHFLPGHTPGCTMIELAGENLMFSGDFLFYRSIGRWDFPYSDANLMKQ
SLEKVMAYKEDFRLLPGHGQETSLRAEQVHLP SWLRYF"
gene 4603..4908
/locus_tag="DMACINML_01467"
CDS 4603..4908
/locus_tag="DMACINML_01467"
/inference="ab initio prediction:Prodigal:2.6"
/inference="similar to AA sequence:RefSeq:CAL34936.1"
/codon_start=1
/transl_table=11
/product="small hydrophobic protein"
/protein_id="Prokka:DMACINML_01467"
/translation="MNLDFVLLCFFVFLDAFALLGLFLGNKKKNQFNDKKFYKICPCK
QMAENGLSTICIYSAVGGFFYSVLSIGYIGFGDLFLNLI FLFTLLTAYVWGWLKLD"
gene complement(5017..5796)
/locus_tag="DMACINML_01468"
CDS complement(5017..5796)
/locus_tag="DMACINML_01468"
/inference="ab initio prediction:Prodigal:2.6"
/inference="similar to AA sequence:RefSeq:CAL34935.1"
/codon_start=1
/transl_table=11
/product="putative oxidoreductase"
/protein_id="Prokka:DMACINML_01468"
/translation="METEFKGKTLVISGGTRGIGKAIIVYEFKVGANVAFTYNSNAQI
ADEMVEDLEKNYKIKARAYEFNILEPETYKELFEKIDMDFDRVDYFISNAIISGRAVV
GGYTKFMKLPKGINNIFTATVNAFVVGQAQEAARKMEKVGGSIIISISSTGNLVYIEN
YSGHGTAKAAVEAMARYAATELGEKNIRVNVVSGGPIETDALRAFTNYEEVKQATINL
SPLNRMGQPEDLAGACFLCSNKASWVTGHTFIVDGGTTFK"
gene complement(5796..6692)
/gene="dapA"
/locus_tag="DMACINML_01469"
CDS complement(5796..6692)
/gene="dapA"
/locus_tag="DMACINML_01469"

```

```

/EC_number="4.3.3.7"
/inference="ab initio prediction:Prodigal:2.6"
/inference="similar to AA sequence:RefSeq:CAL34934.1"
/codon_start=1
/transl_table=11
/product="dihydrodipicolinate synthase"
/protein_id="Prokka:DMACINML_01469"
/translation="MDKNIIIIGAMTALITPFKNGKLDEQSYARLIQRQIDNGIDAVVP
VGTGATLTHEEHRTCIEIAVDICKGTVKVLGAGSNATHEAVDLAQFAKEHGAD
GILSVAPYYNKPTQQGLYEHYKAIANSVDIPVLLYNVPGRTGCEISTETIIKLFDRDCE
NIYGVKEASGNIDKCVDLLAHEPRMILISGEDAINYPILSNGGKGVISVTSNLLPDMI
SKLTHLALEENYKEAKKINDELYNINKILFCESNPIPIKTAMYIAGLIESLEFRLPLC
PPSKENFAKIEEVMKKYKIKGF"
gene complement(6695..7936)
/locus_tag="DMACINML_01470"
CDS complement(6695..7936)
/locus_tag="DMACINML_01470"
/inference="ab initio prediction:Prodigal:2.6"
/inference="similar to AA sequence:RefSeq:CAL34933.1"
/codon_start=1
/transl_table=11
/product="putative zinc protease"
/protein_id="Prokka:DMACINML_01470"
/translation="MIDYSKITLKNKLDVYTFPVNKNSDVISVDIFYKVGSRNEIMGK
SGIAHMLEHLNFKSTKNLKAGEFDEIVKGFVGNASTGFDYTHYYIKCSKKNLTKL
ELFAELMENLSLKDEEFQPERSVLEERRWRTDNNPLGYLYFRLFNFHAFMYHPYHWTP
IGFFKDIENWSIEDIKEFHSIYYQPKNAILIVSGDIDSEEVFSGAKKHFEKIKNTKPI
PKIHTKEPKQDGAKRIEIKKPTHTELLAIGFKIPNFKHKDIPALNALAELLGNGKSSM
MNEVLVDELNLVNEFYFANDCIDENLFIFICNCNVGVKAKEVQELWKIIDRLKKGD
FSSKDLQKVKNNVKSDIFISLDTASAVSNTYGSYLARGDLKPLLEYENNI AHLCEQDL
VKS AKKYFDRSNSTTLILRKD"
gene complement(7933..8991)
/locus_tag="DMACINML_01471"
/locus_tag="DMACINML_01471"
CDS complement(7933..8991)
/locus_tag="DMACINML_01471"
/EC_number="1.3.98.1"
/inference="ab initio prediction:Prodigal:2.6"
/inference="similar to AA sequence:RefSeq:CAL34932.1"
/codon_start=1
/transl_table=11
/product="dihydroorotate dehydrogenase"
/protein_id="Prokka:DMACINML_01471"
/translation="MLYNFIKPLLFKLDPENAHALVEGSLRTLNAALPGSLSFFAYNY
IVNDDSLKQKLLGLDFNNPVGLAGGF DKNATMIRPLAALGFGFLEFGTFTPKPQEGNE
KPRLFRLVKQESIQNAMGFNNQGAEKIAARLSKIYPFVPLPGANIGKNKITSNDKALE
DYFTLFRNFKDLCDYFIVNISSPNTKNLRELQNDDFLNHLL EEARKITNKPILIKIAP
DMPIDSALKLCENAILKGADGFIIANTSVDYSLLDNNRTFGGISGRLITEKSGIFFKE
LARVLFGKTLIIASGGIDSGELAYERIKNGANLIQVYTALIIYKGPSLVRDINKTLIEL
LKQDGMHISEAVGANLK"
gene complement(9037..10770)
/locus_tag="DMACINML_01472"

```

CDS complement(9037..10770)  
 /gene="msbA"  
 /locus\_tag="DMACINML\_01472"  
 /inference="ab initio prediction:Prodigal:2.6"  
 /inference="similar to AA sequence:RefSeq:CAL34931.1"  
 /codon\_start=1  
 /transl\_table=11  
 /product="lipid export ABC transport protein"  
 /protein\_id="Prokka:DMACINML\_01472"  
 /translation="MYKDMTLKDVLRFKPFYKYYKKEFAIAIFGMILTSIGTAGSFA  
 SLKPILDYIFVEKNEALLYTLPFLLVVIYILKNLGFYLLQTYYSFIGMDTLRILRFKV  
 LKNLLRLDLDFKRNRSSELVSRCTNDINALQSIVSNIIPDFFRELLTIVGLLIVVYF  
 QSPILAFFALVVLPCAILPLVHFARKLKKYARSIQETNSDLLSRLSEIFSNIELIKAS  
 NTQNKEGEKFAKQNNELCRLNLKSTRIDALTSPLMEIIGSLGVAAVIIIGGREVIHGT  
 MSVGSFFAFITALFAIYTPLKRLSSLYGRLLQGAIAASERTFYLLIDLEPQILNGSKNLE  
 SIERIEFKQVDFAYENPYKSVLKNINFEFNKGEILALVGTSGGGKSSIIINLLMRFYDK  
 QKGEVLLNDLDISEFSIESLHDRIGLVTQNIYLFNDSFAENIAYSEEPNEEKIISKALK  
 LANAYEFVQEMGGIYAEIKEHGKNSGGQKQRIAIARALYKNPDLIFDEATSALDNE  
 SEKAIETIENLKKDRLVLMIAHRLSTIENADKIAVIDQGMIAIGTNKELLQSCELY  
 QKFKNKEVDKV"

gene complement(10771..12153)  
 /gene="cysS"

CDS complement(10771..12153)  
 /gene="cysS"  
 /locus\_tag="DMACINML\_01473"  
 /EC\_number="6.1.1.16"  
 /inference="ab initio prediction:Prodigal:2.6"  
 /inference="similar to AA sequence:RefSeq:CAL34930.1"  
 /codon\_start=1  
 /transl\_table=11  
 /product="cysteinyl-tRNA synthetase"  
 /protein\_id="Prokka:DMACINML\_01473"  
 /translation="MKLMDSVLKEKIELEQDNINIYLCGPTVYDDAHLGHARSSVCFD  
 LLRRVLLSLGYRVQFARNYTDIDDKILKKMSESGKSLNELVEFYIANYERDMKALNVL  
 EPDFKPRATYYIEPMLDLIHKLSKNGFTYTLDEGVYFDTSKDEDYLSLSHRNTEENVS  
 RLSNEVEKRNESDFVLWKFDEFYDSEFGKGRPGWHTCEVAMIDSIFGDTLDIHAGGV  
 DLLFPHHENEAQRCACKRALAKIWLHNGFVKINGEKMSKSLNNSFFLKDALKDFMG  
 EALRFYLLSSHRAHFNYSLEDLENVKKRLDKFYRLKKRLAVGKSEDFGILNDIEIRS  
 NIAKQILEVLSDDLNISKALALLDEFITNANLELDQQSKNKELKQKIKEALSELAKIF  
 GFGFMDENLYFQWVAAEELKEKIQDQILQRNEAKKNKDFAKADQIREDLLKLGIALQD  
 TPQGTIWEKI"

gene complement(12153..13604)  
 /locus\_tag="DMACINML\_01474"

CDS complement(12153..13604)  
 /locus\_tag="DMACINML\_01474"  
 /inference="ab initio prediction:Prodigal:2.6"  
 /inference="similar to AA sequence:RefSeq:CAL34929.1"  
 /codon\_start=1  
 /transl\_table=11  
 /product="putative integral membrane protein (MviN)"  
 /protein\_id="Prokka:DMACINML\_01474"  
 /translation="MKSLVFKNFIINALGILFSRVLGLARDVLIALLFLGAGIYSDIFF  
 VALKMPAFFRRIFAEGAFGQSFLPNFVKARKKGAFCVSVMYQFSVIVFLFCLLVSFFS"

SFFTKLFAFGFSSDTIALASPLVAINFWYLFFIFLVTFLGAILNRYQKFFITSFSAAL  
FNLSIVIAAFFVDKAPQDTLYYFSYATVLSGVAQLILHLMVLRKNPVIAMALS VKF  
RRAKAKLEGFYSNFFHGVLGSSATQISSLLDTTIIASFLMTGSISYLYANRVFQLPLA  
LFAIALTQVSFPKILKHLKSDQENLALSFMQRALAVLSVLLIVSSIVGSVFALEISKL  
LFERGNFTHEDSIITAYVLIAYLVGLLPFGLQKLFSLWLAKFKQKTAAFIAFKALLI  
SALCSVLFIFLIKDESLKVI AVALSSSLSAFYLLVANIKEFGFKNFFALISFKFCFLM  
IIGLVFTILLYGIKPYLIEALLWIVASVKGVF"

gene 13708..15573  
/locus\_tag="DMACINML\_01475"

CDS 13708..15573  
/locus\_tag="DMACINML\_01475"  
/inference="ab initio prediction:Prodigal:2.6"  
/inference="similar to AA sequence:RefSeq:CAL34928.1"  
/codon\_start=1  
/transl\_table=11  
/product="putative ATPase"  
/protein\_id="Prokka:DMACINML\_01475"  
/translation="MALDEKIISYTENPSRELLSVASRTNIALNELDFHLLAFSTQYR  
LENAEWKIAEKDLVLFKDEMFLKEDLQIKQEYKIEIFHQTSQDKTANAIKLIANKN  
LTKIVAQINFELKHHEKLAFELLQNIYKMKLKLKFLIGIRIFDFKELIRICNEHKK  
NALNKTQLQINVAKGIEPIQSQDEALVLLYKEKAKDYTIDEKRSGIIVDENEVLRYN  
KFKQKQEGKDLNLHTLKVIDANQNKIKFNCSSLAFKAVEYEDYTEYLALKKGYVIEDQ  
DKFDIGTLLEFNNKVDKFNIGIIRAGLDKNVKINIRFISDMQDAVNSGVGIECEELNI  
TGSVGSNTNLKATRMRIEGTTHTKSKIYAKEAYIKTHRGFVQAELNIDLLEGGNVKA  
KEVRIKKS LGGAIEADRIYIEQLESNNSCVFYNNVVIERFEGENNKFHIIKKMKDKDY  
DQELLKIKNEILSLN HKISKLKQYILLNKNVLDIEKKVLELKNQGGNIPNQYEKFLK  
NFSIQNANLNKLQNEKELLAYRKKIHDELLVLEEDLFAKAFINKSGKWSDMNEIRFS  
LLEPKEDVFYSSSTKENAKFIALKKI IQNNQEYIEIDKKLDYEEKDIEWLLPSKE"

gene 15549..16100  
/gene="ruvA"

CDS 15549..16100  
/gene="ruvA"  
/locus\_tag="DMACINML\_01476"  
/EC\_number="3.6.1.-"  
/inference="ab initio prediction:Prodigal:2.6"  
/inference="similar to AA sequence:RefSeq:CAL34927.1"  
/codon\_start=1  
/transl\_table=11  
/product="putative Holliday junction ATP-dependent DNA  
helicase"  
/protein\_id="Prokka:DMACINML\_01476"  
/translation="MVVAIEGIITKKEPTFAIIKCTSGLSYGVFISL FCAAKLETHQK  
YELFITQIIKEDSNKFGYGLDKDEQKMFEMLLKVNGVGASTAMAICSSLDVNSFYKAL  
NLGDESVLKKVPGIGPKSAKR IIVELGDAKVQLESVSDDKSEAL AALLSLGFKQDKIL  
SVLSTCNGKDTSELIKEALKKLA"

gene 16110..17150  
/gene="ddlA"

CDS 16110..17150  
/gene="ddlA"  
/locus\_tag="DMACINML\_01477"  
/EC\_number="6.3.2.4"  
/inference="ab initio prediction:Prodigal:2.6"



```

/inference="similar to AA sequence:RefSeq:CAL34926.1"
/codon_start=1
/transl_table=11
/product="D-alanine--D-alanine ligase"
/protein_id="Prokka:DMACINML_01477"
/translation="MKLAILFGGNSYEHEISIVSAVVLKKVINTDLIFIFCDEKRKFY
LIPSEKMNSKTFSSGAYQKEKELFLRQKAFCKSLWSEKSELEDCVINLIHGRDGEDG
KIASLLEFFDIKFIGRVEASVLSFNKEFTKLYAQSVGVKTLDYQMLRKNQKQDFTAH
FPCILKPARLGSSIGISIAKNEKELDYAKDVGFEFDTDILVEDFKSDIKEYNLGCM
KDEFIFSIIIEPKKKEFLDFEQKYLFSFGHNELIEADLSEELKQKLNKDNFAKIYNPLF
KGALIRCDFFIELDNEVYLNEINPNPGSLANYLFKDFNKIIEQLALNIESEKKIKITYE
FLHSINGQKQKGL"
gene 17210..17425
/locus_tag="DMACINML_01478"
CDS 17210..17425
/locus_tag="DMACINML_01478"
/inference="ab initio prediction:Prodigal:2.6"
/inference="similar to AA sequence:RefSeq:CAL34925.1"
/note="hypothetical protein Cj0797c"
/codon_start=1
/transl_table=11
/product="hypothetical protein"
/protein_id="Prokka:DMACINML_01478"
/translation="MLSEKQDEIYTATEVVRNFSPLIEKLLKSESGKMMVILKNNKFEA
VLLSMKEFERLQNAQMLLENIIYKNQKV"
gene 17427..18158
/locus_tag="DMACINML_01479"
CDS 17427..18158
/locus_tag="DMACINML_01479"
/inference="ab initio prediction:Prodigal:2.6"
/inference="similar to AA sequence:RefSeq:CAL34924.1"
/codon_start=1
/transl_table=11
/product="putative hydrolase"
/protein_id="Prokka:DMACINML_01479"
/translation="MALANVIYNNDTYELSYEILNQDKKSLILHGWGANKELMKQA
FSKLNDFCQIYLDLPGFGNSSAPKSLYSQDYVNIIEKFLKEKLDINIFLGHSGGK
IAALLVLDQKQQLVLLNSGILAKKSFKVRFKIILFKFLKGLGKGFYRYFASKDGA
NLNPLMYQTFKNVDEDLSQTFKIDNKSLIFWGIDDKATPLKSGETMHKLIKTFEY
PLEGDHFFFLKHSLFIANKIKENLC"
gene 18152..19579
/gene="murF"
/locus_tag="DMACINML_01480"
CDS 18152..19579
/gene="murF"
/locus_tag="DMACINML_01480"
/EC_number="6.3.2.10"
/inference="ab initio prediction:Prodigal:2.6"
/inference="similar to AA sequence:RefSeq:CAL34923.1"
/codon_start=1
/transl_table=11
/product="UDP-N-acetylmuramoyl-tripeptide
D-alanyl-D-alanine ligase"
/protein_id="Prokka:DMACINML_01480"

```

```

/translotion="MLTNTLYFLNSLFFNFCVAFYLSALQWYSYKFKRVFFHYHRPL
WHLYFLFLPYFFFLTFPLYSLAYFALIHPTILYFWNKSIDKKLVTFSKVKWFFVVFVI
YNTLFAILALRFSFLFNLFPLFALISLKIFELFSNLYFKNKAKAKLQNNPQLKIILI
TASFGKTSIKNFLYELLKDDFKTYKTPRSVNTLLGIIADINTNLSDDTQIYIAEAGAR
VKGDIDVITRFLEPQICIVGEIGNAHLEYFKNIENRNTKLEALNSKRLEKAFHTST
QKSEDELILLYDDKLQDIQASLQGLEFKINLENKTHEFKSQILGDFNAQNLACILCA
NYLGVKIEKIQQVLKINSVEHRLQIISKEPKFIIDDGFNGNYKGMASASYKLCKSYKG
RKVLVSPGIVEVDKDENIKLAKIINECFDLAIITAQVNADIFKKELEIKTIILKEKAD
LVKVLAKETQQGDLILFSNDAPSFM"
gene 19750..23259
      /gene="aas"
      /locus_tag="DMACINML_01481"
CDS 19750..23259
     /gene="aas"
     /locus_tag="DMACINML_01481"
     /inference="ab initio prediction:Prodigal:2.6"
     /inference="similar to AA sequence:RefSeq:CAL35058.1"
     /codon_start=1
     /transl_table=11
     /product="putative 2-acylglycerophosphoethanolamine
acyltransferase / acyl-acyl carrier protein synthetase"
     /protein_id="Prokka:DMACINML_01481"
     /translation="MQKNSFLQIHGLIPFLLVAFINAFVDLGHKIIIQNTIYKVYEGS
TQLLLTAIVNALILLPFILMLSPSGFLADKYPKNLIMKLSAAFSVILTIICISYNG
AFWTAFAALTFIMGIQAALYSPSKYGFIKELVGKDLLAMGNGAVNAVSVIVAILAGMSLF
SLSFESLYDINHNSSEEVKQVAPLGFLLILFSLIELYLAWRLPKLKDEIKELKFDSK
RYLSGKLLMSNLKLIIFENKIIWLCIVGISIFWAISSQLYLVSPVFSKNELFVENTFFV
QVSLGFSGIGVVLGSLIAGRFSKNYIELGLIPFGALGVFLMALIMPYFTSLITYSFIIF
FIFGFCGALFIIPNLISLIQFHAKENELGKILAGNNFVQNIAMLTFLVLATLFLANLEIN
VVYLFYFITLVAFLGAIYVFKLPFSLVRMLLSIAFLGRYRLLVEGFKNIPEKGGALL
LGNHISFIDWAIVQMAIPRKIYFVMERSIYSKWIYIKIFLDKFGVIPVSSAASKASLEL
IAERIKQGDLVCLFPEGVLSRHGQLNEFKGGFEHVCSNLEEDDGVILPFYIRGLWGST
FSRSDEEFSARNRNLTKRNIAIAFGAPMSLHKKKEEVKAKVFEFSMAWKSQCEAMHT
IARAFITSAKRNLNIAIIDSIAGAISYRKLKLSLFSFILSTLIKENSKKINNNLERGSY
APKEECVGIILLPASFASLLNLSVLLAQKVVVNLNFTAGEKALQAAVKSQAISQIYTS
KKFLEKLESKGVSLNFGEEVNLIMEDVVEIFKKQKSKILAMMVAVSILPSFILKAIF
APSKNNLAIAAILFSSGSEGTPKGVMNLNRRNLSNIAQISDVLCTRNNVDVILSSLPPF
HAFGLTVTTFLPLLESIKSITFADPTDALGVAKAVAKNNVTIMCGTSTFLGIYARNKK
LDAIMFESLRVVVSGAEKLNKNEVRSFAEMKFKKTFEGYGATETTPVASVNLPNRFD
DYWIVHRASKEGSGMPLPGTAVRIVDPNTYETLKTNEDGLILIGGHQVMVGYLNNKE
KTDEVIKEIDGIRWYNTGDKGHLDEDEGLYIVDRYSRFAKIGGEMISLGALEEEIAKF
IDTNIVKFCVALEDEKKGEQVALLVECDEEFFEGVCEAIKSSSMPAIFKPSRYLKVE
KIPLLGSVKVDLKGAKELAKSLI"
gene complement(23337..24248)
      /locus_tag="DMACINML_01482"
CDS complement(23337..24248)
     /locus_tag="DMACINML_01482"
     /inference="ab initio prediction:Prodigal:2.6"
     /inference="similar to AA sequence:RefSeq:CAL35057.1"
     /codon_start=1
     /transl_table=11
     /product="putative integral membrane protein"
     /protein_id="Prokka:DMACINML_01482"
     /translation="MFIFTPLFTIFILLAGGYFAKRVGILKQKQARTFLDFAIVFALP

```

CLIFDKAYHLNFDLSVLVLI FIGFFSCALAAFVWVFLGFIFNFSKATLVSMFLLSCFG  
 NTIFVGMPIIEGIFANAQFGAEVILYDALATTLPI SLIGPFILSLGSGEKVSLMANIK  
 KILSFPPFLALLLGLFCKLISLPEFIFSPIRLF GGAATPVALFAIGLGLGFMAIKTAY  
 KPTILVILAKMVLAPLIFVLLKLFQMQASIIIVAIIESATPTMTLAGAMVMKAKLD  
 SNLAVSSVAFGVLF AFISMPILVWVLV"  
 gene complement(24407..25231)  
 /gene="purU"  
 /locus\_tag="DMACINML\_01483"  
 CDS complement(24407..25231)  
 /gene="purU"  
 /locus\_tag="DMACINML\_01483"  
 /EC\_number="3.5.1.10"  
 /inference="ab initio prediction:Prodigal:2.6"  
 /inference="similar to AA sequence:RefSeq:CAL34918.1"  
 /codon\_start=1  
 /transl\_table=11  
 /product="formyltetrahydrofolate deformylase"  
 /protein\_id="Prokka:DMACINML\_01483"  
 /translation="MISVLKICTKDQKGLIYRISDVIFKYHINIVKNDEFVGEEMFFF  
 RAILEGEFDKKA FVGTLEAMLGEEAYIELCEKRKDIIVFATKESHCLGDLLIKHYSN  
 ELEANIKAVISNHDTLKNLVEKFEIPYHHISAENLERKEQE KQVLECLKEYQFDYLVL  
 AKYMRILSPDFVKHFEGKIVNIHHSFLPAFIGANPYKQAFERGVKII GATAHFVNNNL  
 DEGPIITQAVLPVSHEYTWQDMQQAGRNV EKNVLSKALDLVFD DRIFIHKNKTIVF"  
 gene complement(25232..26347)  
 /gene="cca"  
 /locus\_tag="DMACINML\_01484"  
 CDS complement(25232..26347)  
 /gene="cca"  
 /locus\_tag="DMACINML\_01484"  
 /inference="ab initio prediction:Prodigal:2.6"  
 /inference="similar to AA sequence:RefSeq:CAL34917.1"  
 /codon\_start=1  
 /transl\_table=11  
 /product="putative multifunctional Cca protein"  
 /protein\_id="Prokka:DMACINML\_01484"  
 /translation="MQTSKISLKNADLKFVIDFLSPYTQRAYLVGGSVRDLFLGLEI  
 YDYDIELYDVSPDFEKMMKKLGAQDFGKSFFVYKFKNYDFALARTENKTGYGHTGFE  
 VQICNDEKLGAKRRDFTINSMMINL FNDEF LDFYGG LKDL EQGILRHIDLTSFQEDSL  
 RILRAVAFASRFD FKIADESLKLMQSMNIKDL SRDRINAELYKFFKSSKLEVGKYQLQ  
 ELKIEKEVFGFDSTFKSMEFQALLKQSRKVIKDDALFLYL NFFNLNKEEFFKSKI  
 KKEYFKKANQAFYLDKMSDFDLASIALDMPLKEWLGLWDEERIKRAKFKLYENQFKT  
 SILAKDFIEAGIYGKMLGLKLKEARENELYEYIKRLN"  
 gene complement(26316..26813)  
 /locus\_tag="DMACINML\_01485"  
 CDS complement(26316..26813)  
 /locus\_tag="DMACINML\_01485"  
 /inference="ab initio prediction:Prodigal:2.6"  
 /inference="similar to AA sequence:RefSeq:CAL34916.1"  
 /note="hypothetical protein Cj0788"  
 /codon\_start=1  
 /transl\_table=11  
 /product="hypothetical protein"  
 /protein\_id="Prokka:DMACINML\_01485"  
 /translation="MNLEDLAKKTISEVSSIMEEQRRQSEILKEQEELRKTQIQEDMP

TVELKEEPIVEQKLEDKISMAKFEEEQKIQEEIKNLDELNQEDKEPVKEEAVLQSEIL  
 NPSVIAEVQTLNEDIFLKHLRERILVLFEGLNSTKEENLEHRLQLTINFLEFLLANIE  
 DKLKK"

gene complement(26810..27055)  
 /locus\_tag="DMACINML\_01486"

CDS complement(26810..27055)  
 /locus\_tag="DMACINML\_01486"  
 /inference="ab initio prediction:Prodigal:2.6"  
 /inference="similar to AA sequence:RefSeq:CAL34915.1"  
 /note="conserved hypothetical protein Cj0787"  
 /codon\_start=1  
 /transl\_table=11  
 /product="hypothetical protein"  
 /protein\_id="Prokka:DMACINML\_01486"  
 /translation="MKNTVTEASIYEAQGLKDEALEIYKNILKEDPNNQNAIDAVRRRL  
 SGFRSKHQDLNTQMLDFFINMKSDEEINEFKRWLIKI"

gene complement(27102..27683)  
 /locus\_tag="DMACINML\_01487"

CDS complement(27102..27683)  
 /locus\_tag="DMACINML\_01487"  
 /inference="ab initio prediction:Prodigal:2.6"  
 /codon\_start=1  
 /transl\_table=11  
 /product="hypothetical protein"  
 /protein\_id="Prokka:DMACINML\_01487"  
 /translation="MDYTLFILTFVSVSLLPGLCMSLAFSLGLSLGYKNTLWMIFFGEL  
 VGLALVVLCCALGIEFVLRyenLFKFFQIAGALYLLYIAFVLFRSKSQITQEKIINKK  
 KISLIVQGFIASSNPKAWIFMFSILPSFLKFHVSVNVLLLLIIILLIEFCSLSLYALGG  
 SIFKIFMKNHLDKINKISALFIFVMALSILYKV"

gene complement(27683..28003)  
 /locus\_tag="DMACINML\_01488"

CDS complement(27683..28003)  
 /locus\_tag="DMACINML\_01488"  
 /inference="ab initio prediction:Prodigal:2.6"  
 /codon\_start=1  
 /transl\_table=11  
 /product="hypothetical protein"  
 /protein\_id="Prokka:DMACINML\_01488"  
 /translation="MLDKNILYAILAASLATYLTRVLAFILFKNKKENHLLFVQHNM  
 PLVIIIIILFFYTFYEVDYFYSYPYGIDFIISCILVFLIHILFKNALLSIILGTIFYMFV  
 LRLF"

gene complement(27993..28673)  
 /gene="ygaZ"

CDS complement(27993..28673)  
 /gene="ygaZ"  
 /locus\_tag="DMACINML\_01489"  
 /inference="ab initio prediction:Prodigal:2.6"  
 /inference="similar to AA sequence:UniProtKB:P76630"  
 /codon\_start=1  
 /transl\_table=11  
 /product="Inner membrane protein YgaZ"  
 /protein\_id="Prokka:DMACINML\_01489"  
 /translation="MKQRELFILTIPLVMGYIPLGAAFGILAASKDFSLLEILLSSIF

IYAGAGQFLLVALVAQNVSFLLMIFFTLFLNFRHFFYTLSLLKELKSINFLRHYIIFA  
 LTDEFALLSSIKEKIKNLSRAQRSFVMFEVCLLNQIYWVIGSVLGYFFKQGLNIDYS  
 GVEFSLNALFVVLAYELYKQNPNLKILLYSSFVALFALFCIDKPYMLAFCFIALAIL  
 IFGKKYVR"

gene complement(28670..28846)  
 /locus\_tag="DMACINML\_01490"

CDS complement(28670..28846)  
 /locus\_tag="DMACINML\_01490"  
 /inference="ab initio prediction:Prodigal:2.6"  
 /inference="similar to AA sequence:RefSeq:CAL34914.1"  
 /codon\_start=1  
 /transl\_table=11  
 /product="small hydrophobic protein"  
 /protein\_id="Prokka:DMACINML\_01490"  
 /translation="MVFLIPLLLIIIAIIFGIDYLYFN DENAKVKKEEQQINKTDPNLDK  
 QREEYKHLFKK"

gene complement(28860..29195)  
 /gene="napD"

CDS complement(28860..29195)  
 /gene="napD"  
 /locus\_tag="DMACINML\_01491"  
 /inference="ab initio prediction:Prodigal:2.6"  
 /inference="similar to AA sequence:RefSeq:CAL34913.1"  
 /codon\_start=1  
 /transl\_table=11  
 /product="NapD protein"  
 /protein\_id="Prokka:DMACINML\_01491"  
 /translation="MNLSSVLIVAKVQHIEELKKEILKIPSCSIELCENEKIIIVVIES  
 ENLEKELQSYKMLEKLPHIISINMVFSYQDLKDIQKAISSGAIQTIEKNENAENIRY  
 YGSIYNQIS"

gene complement(29182..30102)  
 /gene="napL"

CDS complement(29182..30102)  
 /gene="napL"  
 /locus\_tag="DMACINML\_01492"  
 /inference="ab initio prediction:Prodigal:2.6"  
 /inference="similar to AA sequence:RefSeq:CAL34912.1"  
 /codon\_start=1  
 /transl\_table=11  
 /product="putative periplasmic protein"  
 /protein\_id="Prokka:DMACINML\_01492"  
 /translation="MKKILFILSFLYILSPAYELKLNSNITALKLDQQELYIGTDKGE  
 IYEYNLKD KSLKELLSLPKIKNYYEGDFARIYSIDVYKNSLLVLSEGDFGGKNSLYD  
 KNLQIQTLQESSVKEAFFIDENTYLLILLGSKIELVNKDLKRINQFKFSHSSLNDAAL  
 NEEKTKLVAGFESGEVELFDLKKWKILKNYDKMHKDNIYQVDLKNDTILSCGTDRRIG  
 LVKNEEQSFLQKDFLIYTCALSPSGKLAAYS DNEAGFNEVFDTNTLTKTIKIFKDENLM  
 SEIIIFINERELIVSGFGDKIVFRSLDESF"

gene complement(30107..30628)  
 /gene="napB"

CDS complement(30107..30628)  
 /gene="napB"

```

/locus_tag="DMACINML_01493"
/inference="ab initio prediction:Prodigal:2.6"
/inference="similar to AA sequence:RefSeq:CAL34911.1"
/codon_start=1
/transl_table=11
/product="periplasmic nitrate reductase small subunit
(cytochrome C-type protein)"
/protein_id="Prokka:DMACINML_01493"
/translation="MKKKIVLLASVATMFLAACALNSGVSSSEQIGLRKASLENENKVD
LVDASFTTLQPGESILFERSFENAPPLISHTIEDMLPITKDNNTCLTCHDKAIASDVG
ATPLPASHYDFRTNKTGDAISDSRFNCTQCHVPQSDAKPLVGNFSKAEFKNEGLKN
RNLIDVINEGVE"
sig_peptide complement(30566..30628)
/gene="napB"
/locus_tag="DMACINML_01493"
/inference="ab initio prediction:SignalP:4.1"
/note="predicted cleavage at residue 21"
gene complement(30628..31410)
/gene="napH"
CDS /locus_tag="DMACINML_01494"
complement(30628..31410)
/gene="napH"
/locus_tag="DMACINML_01494"
/inference="ab initio prediction:Prodigal:2.6"
/inference="similar to AA sequence:RefSeq:CAL34910.1"
/codon_start=1
/transl_table=11
/product="putative ferredoxin"
/protein_id="Prokka:DMACINML_01494"
/translation="MRYLIARRIVQIGILALFSFKATDFILKGNLSSSRLFNTLPLSD
PFAVIQIYLASFVDLMALIGALIVLILYGVFLGRAFCWVCPVNLITDFAAFVRSKM
AFKQSKVLILSKNLRYYILALSLILSFVLSLPVFESISYIGIIHRGIIIFGTTSWIFVA
FILFCIDTFLSPRAICSHLCPLGAFYALISRFALLKIKHNNHQCTKCYKCIGICPEKQ
VLWMIAKESASVNSGECIRCGRCVEVCNDDALNFNIFDLRKK"
gene complement(31410..32150)
/gene="napG"
CDS /locus_tag="DMACINML_01495"
complement(31410..32150)
/gene="napG"
/locus_tag="DMACINML_01495"
/inference="ab initio prediction:Prodigal:2.6"
/inference="similar to AA sequence:RefSeq:CAL34909.1"
/codon_start=1
/transl_table=11
/product="putative ferredoxin"
/protein_id="Prokka:DMACINML_01495"
/translation="MKDRREFFASAFKGLCLCTAGGFLANLSLKADDDYALRPPGAED
EARFLSKCIRGCLCVKACPYDTLKLATLLDSAKNGTPEFKAREIPCYLCKDIPCIKEC
PTDALDKKHLEQGIESLKMGIADVSAVCVAHWGIQCDACYRACPLIDRALKLELKRN
ERTAKHAFLLPSVDHEVCVGCGLCELACITEKPAIRVLPREYVLGKAGSHYVKGWDQE
DEDRIKDADTSKYFDAKKATNYLNEGEI"
gene complement(32168..34942)
/gene="napA"
/locus_tag="DMACINML_01496"

```

CDS complement(32168..34942)  
 /gene="napA"  
 /locus\_tag="DMACINML\_01496"  
 /EC\_number="1.7.99.4"  
 /inference="ab initio prediction:Prodigal:2.6"  
 /inference="similar to AA sequence:RefSeq:CAL34908.1"  
 /codon\_start=1  
 /transl\_table=11  
 /product="periplasmic nitrate reductase"  
 /protein\_id="Prokka:DMACINML\_01496"  
 /translation="MNRRDFIKNTAIASAASVAGLSVPSVPLGAQEEEWKWDKAVCRF  
 CGTGCGIMIARKDGKIVAIGDPAAPVNRGLNCIKGYFNAKIMYGEDRLVMPLLRVND  
 KGEFDKKGKFKQVSWQRAFDEMEKQFKKAYNELGVSGVGFSGQYTIQEGYAALKLA  
 KAGFRTNNIDPNARHCMASAVVGMQTFGVDEPSGCYDDIELDTIITWGANMAEMHP  
 ILWSRVSDRKLNLDKVKVNLSTFSNRTSNIADIEIIFKPNTDLAIWNYIAREIVYN  
 HPEAMDKKFIKDHCVFATGYADIGYGMRRNNPNHPKFKESEKDTVAKENAITLDEEEAT  
 SLSYLVGKAGDKFEMKHQGVADKNWEISFEFKGLAPYTYEYAKVAKGDDNESLED  
 FKKKLQELANLYIEKNRQVSVFTMGFNQHTRGSWVNEQAYMVHFLGKQAKPGSGAF  
 SLTGQPSACGTAREVGTFSHRLPADMVVANPKHREISEKIWKVPAKTINPKPGSPYLG  
 IMRDLEDGKIKFAWVQVNNPWQNTANANHWIAAAREMDNFIVVSDCYPGISAKVADLI  
 LPSAMIYEKYGAYGNAERRTQHWKQQLPVGAAMSDTWQILEFAKRFKLKEVWKEQKV  
 DDKLTLPVLEEAKAMGYSEDDTLFDVL FANKEAKSFTSNDAVMKDFDNSEVKGDERK  
 IQGSDGKEFKGYGFFVQKYLWEEYRKFGLGHGHDLADFNTYHQVRGLRWPVVNGKETQ  
 WRFNTKFDYYAKKAAPNSDFAFYGEFNKMLTNGDLIAPKDEKEHSIKNKAKIFFRPFM  
 KAPERPNEEYPFWLSTGRVLEHWHSGTMTMRVPELYRAVPEALCYMSEKDGEKLGKLNQ  
 GDLVWVESRRGKVKARVDMRGRNKPPVGLVYVPWFDEVYINKVTLDATCPLSKQTF  
 KKCAVKIYKA"

gene complement(35213..35740)  
 /gene="tpx"

CDS complement(35213..35740)  
 /gene="tpx"  
 /locus\_tag="DMACINML\_01497"  
 /EC\_number="1.11.1.-"  
 /inference="ab initio prediction:Prodigal:2.6"  
 /inference="similar to AA sequence:RefSeq:CAL34907.1"  
 /codon\_start=1  
 /transl\_table=11  
 /product="thiol peroxidase"  
 /protein\_id="Prokka:DMACINML\_01497"  
 /translation="MSSVNFKGNPVKLGNSVEVGADAPKVELKAKDLSAIEIGAAGK  
 TQIVLSLPSLDTPVCATEAREFNKKVASYNGAEVVVVSMDLPFAMGRFCSTEGIENLS  
 VASDFVAKEFGKEYGVLIGEGPLEGLLARAVFVIKDGKIAYKELVSEVTEMPDIAKLD  
 AFFGGSSCCGGCGCH"

gene complement(35847..36584)  
 /locus\_tag="DMACINML\_01498"

CDS complement(35847..36584)  
 /locus\_tag="DMACINML\_01498"  
 /inference="ab initio prediction:Prodigal:2.6"  
 /inference="similar to AA sequence:RefSeq:AAW35206.1"  
 /codon\_start=1  
 /transl\_table=11  
 /product="major antigenic peptide PEB2"  
 /protein\_id="Prokka:DMACINML\_01498"

```

/translacion="MKKYLFLSLIAASFLNAEVLVYGGPAPAMKELALKFEEKTKE
KVVVTAGPTPSWFKKAKKDADLIFSGNTSMMDGFIKRIPSLKLLEDLVLNMRPSGIIV
RPNNPKNIKSFEDILKDNVNMVVDGAGQVGLYEDMALKNGKRENLVKLRKNIKVYAK
NSKIAIDEWNNPNIDALIWSHWAKALGDKALFIEDEKAVVYRSAEIIPTKKGLQNK
QALEFVKFIQSKEAQEIWKKHAWNEVD"
sig_peptide complement(36531..36584)
/locus_tag="DMACINML_01498"
/inference="ab initio prediction:SignalP:4.1"
/note="predicted cleavage at residue 18"
gene complement(36631..38661)
/locus_tag="DMACINML_01499"
CDS complement(36631..38661)
/locus_tag="DMACINML_01499"
/inference="ab initio prediction:Prodigal:2.6"
/inference="similar to AA sequence:RefSeq:CAL34905.1"
/codon_start=1
/transl_table=11
/product="putative ATP-dependent DNA helicase"
/protein_id="Prokka:DMACINML_01499"
/translacion="MPLSRLNEEQYLAATANFGHNLIIASAGTGKTSTIVARISYLLS
QGISPQKIMLLTFTNKASKEMISRLGKYFDKNITGKILAGTFHSTAYTLLKSANKDVV
LKQASELKTLLKSVEKRTFRHLSDIKPYQPSYLYDIYSLFQNKAYDQDFYHWF CINY
EDQSIYAEIYEDILKEYSEEKKRFNYVDFNDLLNLKTLTLLNEKKYEFDEILVDEYQDT
NALQSSLIEAFESKSLFCVGDYDQSIYAFNGADINIIGGFKQRFKDAQIFSLNKNYRS
SRSILALANKVILNNERLYPKELIVTRKDEFKAPSLTTFEELFDQYQNIAMILTSGV
SLEEIAVIFRNSSADGIEVALREQGIASVRKSGSGSFFESLEVKAFSAMLALVVPKD
IMAFIHLVQYTKGVGGVLAKEIFDALLLKLGHS LIRGFLEPDKSVNLQNHQKRNYQLG
LFADLEELASENRKFESEFNAPILKLSKINDLCAKNLEKIYFFLKKAMETKHS LAL
VNLICENSFYKEICEELAIKRATNKAGQVDLLRKKENLEKIEMKFVNLKELTKNYS DI
YKYYNFLT LGASEMSNGKGVNLLSVHASKGLEFDLVFVIDLAQGRFPNQKLMMSGSL
EEERRLFYVAVTRAKNILYLSYAKYDKNKKTAFAPSRFLIEAGLCKGELTID"
gene 38783..39715
/locus_tag="DMACINML_01500"
CDS 38783..39715
/locus_tag="DMACINML_01500"
/inference="ab initio prediction:Prodigal:2.6"
/inference="similar to AA sequence:RefSeq:SQE24196.1"
/codon_start=1
/transl_table=11
/product="periplasmic protein"
/protein_id="Prokka:DMACINML_01500"
/translacion="MNFKFFSIIVGILIVILILSGTYYYLFEYSKPSYTPITQTSTE
QNQYSNNTYTTTQNSYVSDTTDTNENNENLQVQDKQDEKDTNIIINDENKSITKSSQI
TKPNNEKKLAAIEKEISKQQKILEQEKIFKPQNTNNKNTNYQAKKLSPAQEYLSLGKN
SRLEPQLSTENMKVYVLDGKFLSDYRIKLLKDM LAIIEDNSKDYFLSVFVKMLPKGEM
SLTIYNKDIIIFSDMKSYKYISMDKISPYIKTPEVLNQYVAREEIIERFKLQTKKEGK
GSDFSKHINSLKAGLNKAQYFFPFCEIIEITSVK"
gene 39739..42351
/gene="valS"
/locus_tag="DMACINML_01501"
CDS 39739..42351
/gene="valS"
/locus_tag="DMACINML_01501"
/EC_number="6.1.1.9"

```



```

/inference="ab initio prediction:Prodigal:2.6"
/inference="similar to AA sequence:RefSeq:CAL34903.1"
/codon_start=1
/transl_table=11
/product="valyl-tRNA synthetase"
/protein_id="Prokka:DMACINML_01501"
/translation="MYDKSIEKTYQICEERGYFEIDGNKAIQEKKNFCIMPPPNV
TGVLHIGHALTFTLQDIITRYKRMDGYKVLVYQPLDHAGIATQNVVEKQLLAQDIKKE
ELGREKFIEKVWEWKEKSGGKILDQMRTLGITPAWSRLRFTMDEGLANAVKKAFVELY
DKKLIVRGNMINWCTHDGALSDIEVEYKENKGKLYHIKYYLKDSDEYLVVATTRPET
FFGDTAVMVHPDDERYKQFIGKELILPLSNKAIKIIADEHVEKEFGTGVVKTTPAHDM
NDYEVGLRHNLFIISVFDEKGILNEHCLEFEGLERLEARDKIVAKLDSLGFIDKIEEH
NNQVGYCYRCNNVVEPYISKQWFVKQEIAKESIEKVALGESKFYP SHVWNSFNAMKMD
LRAWCISRQLWGHQIPVYYCECSHEWASQDTPKTCPCGGQNFQDEVDLDTWFSSG
LWAISTLWGWNGTWGKDKIWFEEDLKEFYPSLLITGFDILFFWVARMFQSTNALGA
LPFKDIYLHALVKDEQGRKMSKSLGNVIDPNESIQEYSADILRFTLALLAIQGRDIKL
SNDKLLQVRNFTNKIYNATNYLLNEEQFEDLEKIELKSALAQFVYSRFQDCVKNVRE
NLDNYRFNDAANTLYKFFWDDFCDWGIELSKAQKESVKELGSIKFKALKLLNPFMPFI
SEYLYHKLSKSELETSASIMISKYPQFHAKNSNIEEIFSLIIESIVSIRRAKSLVDLG
NSKIEKAYIKLNDKMQDEIKSYMKFITMLAKCENIEFTENKLQKAICDVSENLEIFI
ALDNDVLSGILTRLENQKTKLEKESAKLNAMLSNEKFIANAPKEVVEQNKEALANLNT
QLEKISAELANLKG"
gene 42357..43367
      /locus_tag="DMACINML_01502"
CDS 42357..43367
     /locus_tag="DMACINML_01502"
     /inference="ab initio prediction:Prodigal:2.6"
     /inference="similar to AA sequence:RefSeq:CAL34902.1"
     /codon_start=1
     /transl_table=11
     /product="ABC transport system ATP-binding protein"
     /protein_id="Prokka:DMACINML_01502"
     /translation="MIKIQNLKYYGKELVINDVSLEIKKGEIYAIIVGHSGAGKSTLL
RCINGLESYQEGSLKVLDAEIKDLSQSNPKLRMLRKDIGMIFQNFALMERKNVFENV
AMPLRTHYSQCKIYSKLFQKEYMSEKDLNQKVNSLLEVVDLHDHKNKSYPRELSGGQKQ
RVAIARALTLNPKILLSDEATSALDPNTTKNILELIAKINAIEFGITVVLVTHEMDVVK
DVAQKALLLEHGQIIGSGAIDELFLKPNKMKKEFLGESDFLPSTGLNIKLYFPKEVAQ
NSIITHMARTLNIDFNIVWGKIEKLNALGNLVINIDEKDKNKVNLNYVEQSGVLWEV
VS"
gene 43364..44269
      /locus_tag="DMACINML_01503"
CDS 43364..44269
     /locus_tag="DMACINML_01503"
     /inference="ab initio prediction:Prodigal:2.6"
     /inference="similar to AA sequence:RefSeq:ABV52323.1"
     /codon_start=1
     /transl_table=11
     /product="putative ABC transport system permease protein"
     /protein_id="Prokka:DMACINML_01503"
     /translation="MNEISIFDAFLERISQFFTEFSWQGIKEVSLNSIETFQNYENI
LKPALNETIYMSLMAVFFGFILAIIPGILLAIWDKNGIKHNKAIYAVLDFITNLLRAF
PFLILIVLLPLSKIIIVGTSIGTNAIVPLAIGIAPYLAKMLESFAFKEVDHGIIIEAAK
SYGASNTQIIFKVIKIFSEALPNIISGITLTLIFTIGFSALAGTVGGGGLGDVAIRYGYE
RFNKEIMIQTVIILLILVQLVQILGNLFYTWAKNSKTLIYILATLIVLFIISIIININ"

```

DESFVWQAIILIVLVLYSIYKFLKK"  
 gene 44461..45234  
 /locus\_tag="DMACINML\_01504"  
 CDS 44461..45234  
 /locus\_tag="DMACINML\_01504"  
 /inference="ab initio prediction:Prodigal:2.6"  
 /inference="similar to AA sequence:RefSeq:CAL34900.1"  
 /codon\_start=1  
 /transl\_table=11  
 /product="putative NLPA family lipoprotein"  
 /protein\_id="Prokka:DMACINML\_01504"  
 /translation="MNIKNLIVASFLGLAVNLTAETISIAATPVPVHVEILEQAKPEL  
 EKQGYKLEIKEFTDYVLPNLAVDSGEVDANFFQHTPYLEEFNKSKGKLTQKVASVHIE  
 PMAVYSKKYKSLDDIKEGVITIAIPNDPTNESRALDIIAKKGLVEFKEKALKTPLDITT  
 NPKKIKFVELKAAQLPRALNDVDFAVINSNYALSANLNPAQDGVFIEDKESPYANILV  
 VKTGNENDPKIQALVKALQSEKVKQFIIIEKYKGSVLPAP"  
 sig\_peptide 44461..44523  
 /locus\_tag="DMACINML\_01504"  
 /inference="ab initio prediction:SignalP:4.1"  
 /note="predicted cleavage at residue 21"  
 gene 45286..46056  
 /locus\_tag="DMACINML\_01505"  
 CDS 45286..46056  
 /locus\_tag="DMACINML\_01505"  
 /inference="ab initio prediction:Prodigal:2.6"  
 /inference="similar to AA sequence:RefSeq:CAL34899.1"  
 /codon\_start=1  
 /transl\_table=11  
 /product="putative NLPA family lipoprotein"  
 /protein\_id="Prokka:DMACINML\_01505"  
 /translation="MKLLKLILLFCLFNLSPIFAKTITIGATPNPFASLLEKVKDDFK  
 DKGVELKIIIEFSDYILPNRALEEKELDANLYQHHPFLEEYNAQKGTCLTAITPVVIAP  
 VGIYSKTIKDLKNLKKGARVAIPNDATNESRALELLEKAGLIELNQNTLKTPLDIKKN  
 PKNLKFIELKAAQLPRALDDVDIAVINSNFALGAGLNPIKDTIFREDKNSPYVNVVVV  
 RFEDKDSEKTKIIDEILRSDKFRNIINEHYKDVLPAP"  
 sig\_peptide 45286..45348  
 /locus\_tag="DMACINML\_01505"  
 /inference="ab initio prediction:SignalP:4.1"  
 /note="predicted cleavage at residue 21"  
 gene 46066..46842  
 /locus\_tag="DMACINML\_01506"  
 CDS 46066..46842  
 /locus\_tag="DMACINML\_01506"  
 /inference="ab initio prediction:Prodigal:2.6"  
 /inference="similar to AA sequence:RefSeq:CAL34898.1"  
 /codon\_start=1  
 /transl\_table=11  
 /product="putative NLPA family lipoprotein"  
 /protein\_id="Prokka:DMACINML\_01506"  
 /translation="MKFKKVLVSVFCITSFLFGAEKNIIIGATPTPYAEILNFAKPIF  
 KERGNLEVKEFSDYNIPNISLNEKDLNANLYQHNPFLFEDFNAHKGTCLSSLSIVLV  
 PMAIYSNDIKDIKIPNGAKIAIPNDATNESRALDLLAKAGLIEFKTSSTLKTPIIDIS  
 KNPKNLKFIELKAAQLPRALNDVDLAVITTNALGAGLNPLKDGIFIEDKDSLVAIVL  
 AVRQGEKSEKSLILKEILTSKIKNFINEQYKGSVIPTF"

sig\_peptide 46066..46125  
 /locus\_tag="DMACINML\_01506"  
 /inference="ab initio prediction:SignalP:4.1"  
 /note="predicted cleavage at residue 20"

gene 46920..47582  
 /gene="flgA"

CDS 46920..47582  
 /gene="flgA"  
 /locus\_tag="DMACINML\_01507"  
 /inference="ab initio prediction:Prodigal:2.6"  
 /inference="similar to AA sequence:RefSeq:CAL34897.1"  
 /codon\_start=1  
 /transl\_table=11  
 /product="putative flagellar protein FlgA"  
 /protein\_id="Prokka:DMACINML\_01507"  
 /translation="MRIISFIFVFVFIGLSHGANLEEIKTALAKEFKNNFPSLIKNID  
 LKITTLPKDFEQYQFIRIANARFNQAQGFIRAEFKTPQNIQKNVFFRYFMQASLEVLR  
 SERSIQRGDKLGAFDYKSVLMDFDKVP SNALTPEDTHNLIAKSNISKNTILKENMFKT  
 MALIRRNDPIIGILSDGNVDVLIELTALHSADMGERIRAKNKEGKVMQGIIVTGKNRMI  
 IQ"

gene 47579..48142  
 /locus\_tag="DMACINML\_01508"

CDS 47579..48142  
 /locus\_tag="DMACINML\_01508"  
 /EC\_number="4.1.1.-"  
 /inference="ab initio prediction:Prodigal:2.6"  
 /inference="similar to AA sequence:RefSeq:CAL34896.1"  
 /codon\_start=1  
 /transl\_table=11  
 /product="putative decarboxylase"  
 /protein\_id="Prokka:DMACINML\_01508"  
 /translation="MKILLGISGSSSTHLGLKLLKNLENKCELYCIITEGAKISFEAE  
 NKKNLEKICQEEFQNICFLSDNNLSASVASGSFGIEKTIIAPCSISSLAKIHAGLADT  
 LLMRAAAVALKERKSLILGVREMPFSTLNLEHMHKLSQLGVIIAPPPIIASYSHASDLE  
 QMENFIIGKWL DLLGISHNLYEKWQNF"

gene 48182..48658  
 /gene="coaD"

CDS 48182..48658  
 /gene="coaD"  
 /locus\_tag="DMACINML\_01509"  
 /EC\_number="2.7.7.3"  
 /inference="ab initio prediction:Prodigal:2.6"  
 /inference="similar to AA sequence:RefSeq:CAL34895.1"  
 /codon\_start=1  
 /transl\_table=11  
 /product="phosphopantetheine adenylyltransferase"  
 /protein\_id="Prokka:DMACINML\_01509"  
 /translation="MTCLYPGTFDPITNGHLDVVKRALKIFDKVIVAIANSEHKKPCF  
 SLEQRKELAKLATSHLNNVEIITFDNLLVELAKELKVNTIVRGLRAVSDFEYELQIGY  
 ANHALWEEIETIYLMPNLKNAFISSSIVRSIASHGGDVSALVPKEILPFLKDLPCM"

gene 48649..49227  
 /gene="tmk"

CDS /locus\_tag="DMACINML\_01510"  
 48649..49227  
 /gene="tmk"  
 /locus\_tag="DMACINML\_01510"  
 /EC\_number="2.7.4.9"  
 /inference="ab initio prediction:Prodigal:2.6"  
 /inference="similar to AA sequence:RefSeq:CAL34894.1"  
 /codon\_start=1  
 /transl\_table=11  
 /product="thymidylate kinase"  
 /protein\_id="Prokka:DMACINML\_01510"  
 /translation="MYVVFEGVDCVGKSTQISLLKECFKEAIFTAEPGGTKLGAHLRE  
 LLLHKPYQLDKKTELLFLADRAQHYDEVLKANQDKLIISDRSFISGMAYAKDFENEE  
 LFRLNFALENFFPQKVIFLKGDENLIKERLNQKEQDAIEKRGIDYFLSVQDKLENTL  
 HFLKEKINLQVLTLNANDTKENLHQKIKDFLQ"

gene 49224..50450  
 /gene="hisS"

CDS 49224..50450  
 /gene="hisS"  
 /locus\_tag="DMACINML\_01511"  
 /EC\_number="6.1.1.21"  
 /inference="ab initio prediction:Prodigal:2.6"  
 /inference="similar to AA sequence:RefSeq:CAL34893.1"  
 /codon\_start=1  
 /transl\_table=11  
 /product="histidyl-tRNA synthetase"  
 /protein\_id="Prokka:DMACINML\_01511"  
 /translation="MINALKGMKDLSDKDALYEEKIIKTCEEVAKNYGFNFINTPHLE  
 QSILFKRSVGESSDIVGKEMYEFVDKGGNEVCMRPEGTAGVVRAYIEKKLDKNISVKR  
 WFYHGSMFRYERPQKGRLEFHQFGVESFGIPSVYEDASIIIMLVEIFSRGLGIDFKLQ  
 LNSLGCSQCLPKYRDELIEFLDSKEGFCECLRRKNLNPIRVLDCNEHCQNLENAP  
 LLINNLCTSCQKDFETLQQILKDNGVKFELDSKLVRLDYYSKTAFAFISDEIGAKAA  
 IAGGGRYDRLIEYLGKSGYGIGFAMGIERIIAILEQKEELEKREGIYLCAMDEIYIP  
 KLLQIATKLRKKHKVILSYEARKLAKHLESGDKINSKHF LCMGENEAKNESLFYKNLE  
 NKDEKMIKISDLENAL"

gene 50447..52282  
 /gene="speA"

CDS 50447..52282  
 /gene="speA"  
 /locus\_tag="DMACINML\_01512"  
 /EC\_number="4.1.1.19"  
 /inference="ab initio prediction:Prodigal:2.6"  
 /inference="similar to AA sequence:RefSeq:CAL34892.1"  
 /codon\_start=1  
 /transl\_table=11  
 /product="biosynthetic arginine decarboxylase"  
 /protein\_id="Prokka:DMACINML\_01512"  
 /translation="MMNYGIDIWGNENFIIKNGKVCINHEKKPAIIDIVKELRDDGYK  
 GPLLLRFPHLIQKQIESIYGSFNKARKEFDYKGFNAVYPLKVNQYPGFVKNLVRLLGK  
 DYNNGLEAGSKAELLAMAYNNEDAPITVNGFKDRELINIGFIAAEMGHNITLTIEGL  
 NELEAIVDIAKERFKPKPNIGLRVRLHSAGVGIWAKSGGINSKFGLTSTELIEAVNLL  
 KENKLLLEQFTMIHFHLGSQLITEIHPLKALNEAGNIYTELRKMGAKNLKAINLGGGLA"

```

VEYSQFKNEKSRNYTLREYANDVVFILKNIAEQKLDLEPDIFIESGRFVAANHAVLVA
PVLELFSQEYTESKLILKKQNPKLIDELYDLYKSIKPSNALEYLHDSIDHLESILTLF
DLGYVDLQDRSNAEILTHLITKKAILLLGDKQNPADLLAIQDEVQERYLVNFSLFQSI
PDFWGLEQNFPI MPLDRLDEEPTRSASIWDITCDS DGEISYSKNNPLFLHDVDVEKEN
YFLGFFLVGAYQEVLGMKHNLFTHPTEATISVNEKGYEIEGII EAQSILDALEDLDYD
IHTIMDILNERISNSKLVNEKQKKHILGELYFLNDNGYLK SIGV"
gene 52283..52915
      /locus_tag="DMACINML_01513"
CDS 52283..52915
     /locus_tag="DMACINML_01513"
     /inference="ab initio prediction:Prodigal:2.6"
     /inference="similar to AA sequence:RefSeq:AHW91821.1"
     /codon_start=1
     /transl_table=11
     /product="serine acetyltransferase"
     /protein_id="Prokka:DMACINML_01513"
     /translation="MGFFSIIKEDFSQPKAQDPAYNSCVELFFNYPGVWAVVNYRFAH
FFYTKNFKRTARIISGISQFLTGVDLHPGATLGRRIFIDHANGVVIGQTAVIEDDLI
YQGVTLGGTSLEKGIKRHPTIKKGVIIIGS GAKVLGNITIGENAKIGSNAV VVKDVGAN
LTAVGIPAYIVEERRKNKENTRAVDANCEDKLEKLERKIAELEKALSNIK"
gene 53067..54236
      /gene="aspB"
      /locus_tag="DMACINML_01514"
CDS 53067..54236
     /gene="aspB"
     /locus_tag="DMACINML_01514"
     /EC_number="2.6.1.1"
     /inference="ab initio prediction:Prodigal:2.6"
     /inference="similar to AA sequence:RefSeq:CAL34890.1"
     /codon_start=1
     /transl_table=11
     /product="aspartate aminotransferase"
     /protein_id="Prokka:DMACINML_01514"
     /translation="MLTQRSQVLEESITLAILANDL KAKGEDVISFSAGEPDFDTP
QTIKNAIAIAIEKGC GKYTAVAGIPEVLKAIQNK LKKDNELSYETSEIITNVGAKHSL
FECIECLVEEGDEVIIPSPYWVSYPEMVKFAGGKPVFIEGLEENGFKINAEQLKKAIT
PKTKILMLNPSNPVGSIIYSKEELLSIAKVLEGT KIIIVLSDEMYEKLRYDGFVFAFA
SVSEDALNRTVTINGLSKCGAMPGWRF GYMASKNKALISAVKRLQGQSTSNICSITQH
AAIPALNGECDEDEIEKMRQAF EKRRDLALNMLHQIPNISVYKPEGAFYLFVNTQKIEK
DSMKFCQKLL EEEKVAVVP GIGFGMDGYFRLSYATSDEL IKKGIERIANFVKNYK"
gene complement(54314..54655)
      /locus_tag="DMACINML_01515"
CDS complement(54314..54655)
     /locus_tag="DMACINML_01515"
     /inference="ab initio prediction:Prodigal:2.6"
     /inference="similar to AA sequence:RefSeq:CAL34889.1"
     /note="hypothetical protein Cj0761"
     /codon_start=1
     /transl_table=11
     /product="hypothetical protein"
     /protein_id="Prokka:DMACINML_01515"
     /translation="MKIVQWSKA EFSPEVKINVLIDDEHSKEIQILLAKDSVMKEHK
APFAIRVQVLSGKIWF E VENERFEFNALDMISLEANVPHSLGGLEDSVIRLSLNKLDK
VQRVNAVLKKP"

```

gene complement(54726..55748)  
/locus\_tag="DMACINML\_01516"

CDS complement(54726..55748)  
/locus\_tag="DMACINML\_01516"  
/inference="ab initio prediction:Prodigal:2.6"  
/inference="similar to AA sequence:RefSeq:AGQ95403.1"  
/codon\_start=1  
/transl\_table=11  
/product="zn-dependent hydrolase"  
/protein\_id="Prokka:DMACINML\_01516"  
/translation="MNLSFKTFDLSSKEHPKAKKVQGKKYEIFLNENSQTHNAFKASF  
REVLRYYYLYPKNAKATFKLPFFKPNLNHFHTPHITWLGHSSLFVSYKNYKILIDPIF  
NTHASPFSEINKAFKNAPVYNANDFDEIFAVIITHSHFDHLDEKSVKALKNKAKFFIT  
PLKVGNYLKS YGVSEKKIIELDWWSGVFEDDLRIIATPAQHSSSRGDGLNKT LWASFV  
MEFLSADKRVFFSGDGGYFTHFKKIGAYFGGFDLVCL ESGQFNTAWPFSSFPDQILK  
EAKDLNAKALMPIHWGRFLAGTHAWNGVVEFLYENLNLPLITPKMGEAYEVGSEFKQD  
FWWKEG"

gene 55867..56694  
/gene="fliL\_2"  
/locus\_tag="DMACINML\_01517"

CDS 55867..56694  
/gene="fliL\_2"  
/locus\_tag="DMACINML\_01517"  
/inference="ab initio prediction:Prodigal:2.6"  
/inference="similar to AA sequence:RefSeq:CAL35517.1"  
/codon\_start=1  
/transl\_table=11  
/product="putative flagellar protein"  
/protein\_id="Prokka:DMACINML\_01517"  
/translation="MQKENLYKLGKIIKEIDFIFEQTNGKLMQALKNEIKQKAI FMSI  
INIKETIKNIQDSADTEVMIIIFREEDMKRLSKSRNIAAHDSQAMN LNIVTNLIRYDLP  
RLKQSIVNFKNPDLHFIPKEENVKRT LKPLEALIIIFL FACILSCIVFIVFLLNK  
PPKNIKQENSSYSFHKNYFYPLEPFILNLQQAGRQKYIRCTIELELIKEIALEDFTKI  
SPVIRDTIIQTILAKEIQEIEFSNFKLELQREL VKKINEKLGKLIKELYFRDFIIS"

gene complement(56754..58625)  
/gene="dnaK"  
/locus\_tag="DMACINML\_01518"

CDS complement(56754..58625)  
/gene="dnaK"  
/locus\_tag="DMACINML\_01518"  
/inference="ab initio prediction:Prodigal:2.6"  
/inference="similar to AA sequence:RefSeq:CAL34887.1"  
/codon\_start=1  
/transl\_table=11  
/product="heat shock protein DnaK"  
/protein\_id="Prokka:DMACINML\_01518"  
/translation="MSKVIGIDLGTTNSCVAVYERGESKVIPNKEGKNTTPSVVAFTD  
KGEVLVGDSAKRQAVTNPEKTIYSIKRIMGLMINEDAAKEAKNRLPYHITERNGACAI  
EIAGKIYTPQEISAKVLMKLKEDAEAF LGESVTD AVITVPAYFNDAQRKATKEAGTIA  
GLNVLRIINEPTSAALAYGLDKK DSEKIVVYDLGGGTFDVTVLETGDNVVEVLATGGN  
AFLGGDDFDNKLIDFLASEFKDETGIDLKNDVMALQRLKEAAENAKKELSSANETEIN  
LPFITADASGPKHLVKL TRAKFEGMIDSLVAETITKINEVVKDAGLDKNEIKEIVMV  
GGSTRVPLVQEEVKKAFGKELNKSVPDEVVAIGAAIQGAVIKGDVKDVL LLDVTPLS  
LGIETLGGVMTKIIIEKGT TIPTKKEQVFSTAEDNQSAVTINVLQGEREFSRDNKSLGN"

```

FNLEGIPPAPRGMQPQIEVTFDIDANGILTVSAKDKATGKAQEIKITGSSGLSEEEINN
MVKDAELHKEEDKKRKEAVDARNAADSLAHQVEKSLNELGKQVADSDKENIQKALDDL
RET LKNQNASKEEIEAKMKALSEVSHKLAENMYKKDEPNAAANDKKKKDDVIDAEVE"
gene      complement(58647..59174)
          /gene="grpE"
          /locus_tag="DMACINML_01519"
CDS      complement(58647..59174)
          /gene="grpE"
          /locus_tag="DMACINML_01519"
          /inference="ab initio prediction:Prodigal:2.6"
          /inference="similar to AA sequence:RefSeq:CAL34886.1"
          /codon_start=1
          /transl_table=11
          /product="heat shock protein GrpE"
          /protein_id="Prokka:DMACINML_01519"
          /translation="MSEQKQEFENENAQNSENLQDDLQDSEESETNELQKELDELKDK
YMRANAEFENIKRMEKEKLSAMAYANESFAKDLLDVLDALEAAVNVCEQDEISLKIK
EGVQNTLDLFLKKLEKHGVALIKDEKEFDPNLHEAMFHVDSENHQSGEVVQVLQKGYK
IADRVIRPTKVSVAK"
gene      complement(59171..59962)
          /gene="hrcA"
          /locus_tag="DMACINML_01520"
CDS      complement(59171..59962)
          /gene="hrcA"
          /locus_tag="DMACINML_01520"
          /inference="ab initio prediction:Prodigal:2.6"
          /inference="similar to AA sequence:RefSeq:CAL34885.1"
          /codon_start=1
          /transl_table=11
          /product="putative heat shock regulator"
          /protein_id="Prokka:DMACINML_01520"
          /translation="MKS RDKKNLILESIIQTYLLD NAPIGSNELNSNLCIPASTIRVY
LKRLSDEGLITQLHISGGRIPTILTMQNYWQNFWEKEQDKNIHIKNESFLKELSKEFE
IYCLVYGG RSLVLKEVLDLNAKFIVLDFKDEELVLKYEKEAWNFLQSLIGLDLSSIEK
IAFKVHFV ELAEKIASLRQNLICYSNEERAYQIYQNDEFVKLLDQC IHRHFKESLEF
EPLFKEGFMGIKVDAQFLGEDVNIILAGSVYTDYKKILQYIKEAA"
gene      complement(60272..62362)
          /locus_tag="DMACINML_01521"
CDS      complement(60272..62362)
          /locus_tag="DMACINML_01521"
          /inference="ab initio prediction:Prodigal:2.6"
          /inference="similar to AA sequence:RefSeq:ADT66092.1"
          /codon_start=1
          /transl_table=11
          /product="ferric receptor CfrA"
          /protein_id="Prokka:DMACINML_01521"
          /translation="MKKLCLSVCAIGLLASNAISQNVELDSSIVSASGFAQDIKEAPA
TINVISKKELQSKPYRDVAEAIADIPGVDLYASKGKTGSYNITMRGITGYTLVLIDGR
RQGIGGEVGPNGFNEISNSFLPPISSIERIEVIKGP MSTLYGSEALGGV VNIITKKVS
DKWETSVSLDALLNENKDWGNTYGT SIYSSGPLMNDKLG LTLRFRFYRQ QSNVEFTN
GSGQRVQGDQAQSPTKANNFNIGTRVSYLANDYNTFIFDIDFSRNHYDNKQGQLGTIT
RPGSAQDSL TGGYADIMEVDK FVTYLSHEGVYENFSITSGLQYNRVSN DGREVVGQAT
QPFLGENR DIVAEDIILD TKSVIPLGQSHILSAGGEYRLEKMQDKIASPTNFDQYLLA
IFAEDEYS IKDDLRLTFGARYNHHEIFGNVSPRAYVVY NPTNELTFKGGVSTGFRTP

```

YANRLINGTYNYSQGGRFPTYGNPDLKEETSLNYEIAAIYNNDLFYVSATGFLTDFKD  
KISSQSYNNGTMIPGIGACDADRCSRAINHGKVEYKGVELGAGISPLDNLNVNFAYTY  
LDTEVKEAQRVIGKPEQDSLKHNI MLKTEYSFYKFTPWIKGEWQIDRYMGDTNIN  
REYYKDIFLASMGVRYDINKQWSINAAIYNLFDKSFTNGWESYTSGSNTWVNTYNRI  
EEGRRMYISINGSF"

sig\_peptide complement(62300..62362)  
/locus\_tag="DMACINML\_01521"  
/inference="ab initio prediction:SignalP:4.1"  
/note="predicted cleavage at residue 21"  
gene 62680..63381  
/locus\_tag="DMACINML\_01522"  
CDS 62680..63381  
/locus\_tag="DMACINML\_01522"  
/inference="ab initio prediction:Prodigal:2.6"  
/inference="similar to AA sequence:RefSeq:AMK27626.1"  
/codon\_start=1  
/transl\_table=11  
/product="energy transducer TonB"  
/protein\_id="Prokka:DMACINML\_01522"  
/translation="MRMFISNHKNQSSLITLFFVFTPLFFVFLYSKNFLHIQPNVDIKE  
NKFNMAIKHFVQNSSDIKPTQPTQTIQEPSNLPKEPVQEIIKKTKRPEKPIIKPKK  
IIPPTNAKAISQPKKDTSSQQPITQQQAPQTNSYQSVSLTSNSELLKEIKSAIDEALI  
YPRQARKMRMSGEVLVEFTWTKEKKLENLILKPSKYDFLNKSALETIRVASKKFPQY  
EKTFFHIKIPLVYKLS"  
gene complement(63690..64139)  
/locus\_tag="DMACINML\_01523"  
CDS complement(63690..64139)  
/locus\_tag="DMACINML\_01523"  
/inference="ab initio prediction:Prodigal:2.6"  
/codon\_start=1  
/transl\_table=11  
/product="hypothetical protein"  
/protein\_id="Prokka:DMACINML\_01523"  
/translation="MFRVDQKGLVNLNLKHKNEIQATQSNQKQTFSELDLGAKEKSS  
LYDRPLKELFQEAKEASQNALKEYREEIHYNKKTQRYESSFVESNEKYKEKIKIEE  
QIKENIQNNIQSKISHTNIHLNPKQLIAQAQFEKQKAALKSSDLFI"

ORIGIN

```
1 accatagttt gagttatcat tgatgctaaa gatactcata ttaattcctt gatttagatt
61 tttttgcctt caatctaaat atattttata aataatacaa gcaaaatttg ttccactttg
121 gaataaatta ttctcccaa taaattcgca aagccctttc atagtcttct tgggtgtcaa
181 tccccatgct atcagtgtta atttgaagca tttttatctt tttgccattt tcaatagctc
241 ttaattgctc tagtttttca gctttttcaa gagcagaatt ttccaaagtg caaaattcac
301 gcaaagcttt aacgctataa gcataaattc ccaaagtcc tttaaaactt tcctcatagt
361 ctgccctttc gtaaggaatt ttcgctcttg aaaaatataa agcaaaatta tttttatcgc
421 aaaccacttt caccaaattc ggatcgcttg catcatcttt actgatatcc ttataacaac
481 tcgccataaa agcttcttgt ttcaaacaag aattagcaaa ttctttaaat ttggctaaat
541 tctcgcattc tataaagggg tcatctgctt gtacattgat gatgatttca tcatctttta
601 ggттаagctt tttacaagct tcattgatcc tatctgtgcc actttcatga tttttacttg
661 ttaaaaccgc gttaaagcca tatcttttag cgatttctag caccttttca tcatctactg
721 ctatacaaac ctcatccaca ctcgaaactt gcttagcagt agcgataaac ataggtagac
781 cacctatata gcaaagaatt ttctcaggaa aacgcgttga agctaacttt gtcggtataa
841 taatcatttt ttaatccatt ctaaaatttc accttcgata tctcctatct catagacttt
901 ttcacagca tttttaagat caaaaagctc taaaagatct tttttgatat ctactttaaa
961 ttctttagcc aaaagctcaa aatctgcctt ttcctcttg cattctctac caaaaagctc
```



1021 ttttaccata cttggagtaa atttagtcca ttctgctggt gaagtgatga tgcttggcctt  
1081 tgaagtatca agcattttaa agcaagttgc agtatgcgga tcgattaaaa ttttactctc  
1141 ttttaataaaa ttcatacatt cttcatcggt gcaaaaatca gcttcaaaat cctcttgcaa  
1201 acttttgtaac tcctcttttt ctaatttgaa atattttctca gtttttaaca aattcatcaa  
1261 ttcattagtc ctaagatctg aaaatrtaga aaataacaat ctttcgatat ttgaagaat  
1321 aagtatatcc atagccggag aaatcgtcct ttttaactt ctatccctaa gatcatattc  
1381 tcctttggtg aaaaaatcag taagaatatt gttagcatta gaaacaattt ttatcttaga  
1441 aatttttagct cccatcaatt tagcataata cgctcctaaa gcattgccaa aattcccact  
1501 tgggtacaaga atttcaatct cttcttttaa ctcatgataa agtttttaagc ttgcatagta  
1561 atgatagatg atttgaaata aaattctacc aaaatrtaca gaattagcag cgcaaagtc  
1621 gtatcctact ttgctcaatt catcttttaa agtttctttt gcaagcaaat tttttaaagt  
1681 gcgtttgtgca tcatcaaaat ctcccctgat agcaaaaact tttaaattt ccttatctaa  
1741 agctctcatt tgaagctcct gtatagcgct tgttccacct tttggatata tgcaaagcac  
1801 tttaatatrt tctaaatrtt caaagctrtt aagcgttgca ggtcctgtat ctccactcgt  
1861 agcaciaaatg attaaaatrt tttcattttg agaaaattca tttaaaagca ctccaaaagg  
1921 ttgtaaagcc atatctttaa aagctcttgt aggcccatgc caaagctcgt taatatatgt  
1981 tttatctrtt atctrtttta aagcgatagg cgagtrttta tcatcaaat tttcataact  
2041 ttttaaagcc ttatcaaa caagcctcatg tccaaattca aaactctcta tcaactrtta  
2101 agcaaatctt ttataagata agtctgcgta ttttctcca tcaaattgag gcaaaactta  
2161 agcgaataa agcccacctt gtggagcatt aggattaact aatgcatttt taaaatctac  
2221 tttattgtrt atatrtctac tttcaactag caacattaaa actccttata tattgatata  
2281 atrttctrtt gaaatrttct ttttaattcta tatttaattc tataatctga cacttaaatc  
2341 caaaatcctt cacrttaaca taatcrttaa aagttagcat taaagtatca caatgatgct  
2401 tatccaaca agcttgcaat tcttctrtt taaattcata atgatcttta aaaaaataac  
2461 aagccctagc ctttataaaa tgctcataaa gcctaaaagg ctttgcaata gctgtaatca  
2521 aaaccgcctt aggatrttct tttacataag aatagcgtat aaaatcccta ccctcacaag  
2581 ctataaaatc agctrttttt tcgtaaaat taggcaaacg ataagcaccg cttggtaagg  
2641 taaaatrtaa ataaggctt atcttgctt caagtaaat atcaaatrtt tggatatgaa  
2701 atttagaaaa agcatcatct aaaagcacta ttttagccc tagctcaaaa gctrtttgaa  
2761 ttcctactac cctatcttca cttacgatca cgcccttgac acattcttca aatgcatact  
2821 ccatcgctt atcgccactt tgcgaaact gagctaaaat tgtatrttca tttttaaacta  
2881 caactaaacc cttactrtta cgcttataac ctctaagcac tataaaaacg cttcaaat  
2941 cccttgctat agccttgcaa ataggtgtrt ttccatrtt tccaaagctt aaatrtccta  
3001 cgcttataat ggttrttta aatcaatct tttgacgaaa acaagtatrt aaaatcgcac  
3061 acaaaccata aagcaaaact aaaggcaaaa gaataaaagc taaacatrtt tgaaaaaagc  
3121 tgggctttaa aaaataatrt tcaagccaaa gttgatact ttttcttca ttcattatrt  
3181 attcaaactc gcaatrtcag gcatatrtct tttaaaagca ttgtrttta tcttgattg  
3241 aagcatatct aataatrtt tcttaaat ttctaatact ttcacatctt gatrttcaag  
3301 cgctrttaat ctttgtcta taagctcata ggaaaaacc aagtctrtt catcacttg  
3361 tcctatcaa agatctgcac ttggagctt ttgaaatgaat ttttcatrtta aatrtaaata  
3421 tcttgctaat tcaaaatrt cactrttata aagctctcct atgggattaa aagcgtaaagc  
3481 taaatctcca taaatrtgct catagcctaa aagcaatrtg ctttatttg aagtaccaac  
3541 cactaaagct tttttaaag cagaataatc ataaagcaag ctcatrtta tgctgctggc  
3601 aaaatrtccc ctgcttaact catctgtat ttcactrttg tttaaaaaag cttctaaat  
3661 gtcttgaatt tctatgattt tgtatrtttaa atrttaatrtc tgacaaagat ctaaagcatc  
3721 gtrtaaatrt tcttgattag aaaatrttgt gggcattaaa agcgcaaaaa catrttgc  
3781 taaagcctt ttgcacagcg tgcaccaaa agcagaatca attccccac taagctctaa  
3841 aacaacacca cttaaaccg agtcttgaac cttgactga ataaatrtcac ataaagcttg  
3901 agaaatrttt tcaaatcca taaactrtac tttaaacaat caatgtataa ttataatrtca  
3961 ttttaagtrt aaatrtcaat aaaaaaggct aaaaatrtcaa atrttaaaac aagcttgctg  
4021 accttatgag acaaatrtgct atatrtttaa tacctctaaa ggggatttta taatagatcc  
4081 tggccttaat gctctaagct ttataaaaca atacgctaaa aaactctag cgatrtttaa  
4141 tactcacgga cattatgatc atgtatggga taatgctaga gtaaaaaaag aatrtgatc  
4201 tccaatrtat atccataaaa atgatgaatt tatgctacaa gatcctrttg gaaaagtrt

4261 tgagccaagt aatgcagatg ttttaatcga aaatgaagat gagcttgaaa tttctaacac  
4321 tcggttttaa tttcattttc tccctgggca tacaccaggc tgtaccatga tagaacttgc  
4381 ggggtgaaaat ttgatgttta gtggggattt tttattttat agaagtatag gaagatggga  
4441 ttttccttat tcagatgcta atttaatgaa acaaagcttg gaaaaagtga tggcttataa  
4501 agaagacttt agacttttac ctgggcatgg gcaagaaaca agccttaggg ctgaacaagt  
4561 gcatttgcct tcttggctta gatattttta aaggtggctt ttgtgaattt ggattttgtg  
4621 ttactttgct tttttgtttt ttttagatgct tttgcacttt taggtttatt tttaggaaat  
4681 aagaaaaaaa atcaatttaa tgataaaaaa ttttataaaa tttgtccctg taacaaaatg  
4741 gcggaaaatg gctctttaag tacaatttgt atttattcag ctgtgggagg atttttttat  
4801 agtgtattgt ctataggtta tattggggtt ggcgatttat ttttaaattt gattttctta  
4861 tttacgcttt tgactgctta tgtgggctgg aaactaaaac ttgattaaac tctgttttta  
4921 tgattgtttt aaaaaattta tttttataag tgcaagtttt ttaagcaagc actcaaaaaa  
4981 taataatat tttttaagta aaattaaaat tttattttac ttaaaagtcg ttccaccatc  
5041 tacgatgaaa gtgtgtcctg ttaccaact tgctttattt gagcaaagaa aaagacaagc  
5101 accggctaaa tcctcaggct gtcccatgcg gtttaaagga cttaaattta tagttgcttg  
5161 ttttaacctc tcataatttg taaaagctct taaagcatct gtttcaatcg gtccaccgct  
5221 gactacattt acacggatat ttttttctcc aagttctgtt gctgcatatc ttgccattgc  
5281 ttcaaccgca gcttttgctg tgccatgtcc tgagtaattt tctatataaa ctaaatttcc  
5341 agtagatgaa attgaaataa tacttccacc ccctactttc tccattctct tagctgcttc  
5401 ttgggctccc acaacaaaag catttacagt agcagtaaag atattgttaa ttccttttgg  
5461 ttttaacttc ataaatttag tataaccacc cacaactgca cgacctgaaa taatagcatt  
5521 tgaaataaaa taatccacc tatcaaaatc catgtcaatt ttttcaaaaa gctctttgta  
5581 agtttcaggt tctaaaatat tgaattcata agctcttgct ttgatcttat aattcttctc  
5641 caaatcctca accatttcat cagcgatttg cgcatttgaa ttataagtaa aagctacatt  
5701 tgctcctact tttgcaaatt catatacaat agccttacca atcccgcgtg ttccgccact  
5761 aataactaag gtttttcctt taaattctgt ttccattaaa atcctttaat tttatatttt  
5821 ttcatcactt cctctatttt agcaaagttt tctttacttg gagggcaaag aggaagtcta  
5881 aattccaaac tttcaataag tcctgctata tacatagcag tttttatagg gatgggattg  
5941 ctctcgcaa ataaaatttt attgatatta taaagctcat cattaatctt tttagcttct  
6001 ttataatttt cttctaaagc caaatgggta agcttgctaa tcatatcagg caataaattt  
6061 gaagtaactg aatcacccc tttgccccca ttagaaagta taggataatt gatcgcatct  
6121 tcacctgaaa tcaatatcat ccttggttca tgtgcaagca aatcaacgca tttgtctata  
6181 tttccactcg cttctttaac tccataaata tttcacaat ctctaaataa ttttaataata  
6241 gtctcggtac taatttcaca gcctgttctt ccaggacat tgtataaaaag cacaggaata  
6301 tccacactat ttgcaatcgc tttataatgc tcataaagtc cttgctgtgt cggtttgta  
6361 taataaggag ctacgcttaa aattccatct gctccatgct ctttggcaaa ttgagccaaa  
6421 tccacagcct catgagtagc attgcttcca gcaccgcta gaacctaac cttagttcct  
6481 ttacaaatat ctactgcaat ttcaatacaa gttctatggt cttcatgggt taaagttgca  
6541 ctttctcctg tcgtcccaac aggaactacc gcatcaatgc cattaatcaat ttgtctttgt  
6601 atcaatcttg cataactttg ctcatctaac ttgccatttt taaaaggtgt aatcaaagct  
6661 gtcattgctc cgataatgat atttttatcc attcttaatc ctttcttaaa atcaatgtag  
6721 tcgaatttga tctatcaaaa ttttttttag cacttttaac caagtcttgc tcgcacaaat  
6781 gggctatatt gttttcatat tctaagagag gttttaaatc ccctctagcc aaataagaac  
6841 cataagtatt ggaaaccgca cttgctgtat caagcgagaa gataaaatcg ctcttgacat  
6901 ttttttttac tttttgcaaa tccttgcttg aaaaatcacc ctttttaagc ctgtctataa  
6961 tcttccaaag ctcttgctct actttttctg cttttacacc tacattgcaa ttacaaataa  
7021 aaataaacia attctcatct atacaatcat ttgcaaaaaga ataaaattca ttaaccaaat  
7081 ttaactcatc aaccaaacc tcattcatca tagaactttt tccatttcct aaaagctctg  
7141 ctaaagcatt taaagcgggt atatccttat gtttaaaatt aggaatttta aaacctatgg  
7201 caagaagttc ggtgtgagtt ggttttttaa tctctatcct tttagctcca tcttgtttag  
7261 gctctttagt atggattttt ggaatagggt tggtattttt gattttttca aaatgttttt  
7321 tagctccact aaaaacctct tcgctatcaa tatcccact tactatcaaa atagcatttt  
7381 taggctgata ataaatgcta tgaaattctt taatatcttc tatactcaa ttttctatat  
7441 ctttaaaaaa gcctatagga gtccaatgat aaggatgata cataaaagcg tgattaaaaa

7501 gtctaaagta caaatatcct aaaggattat tatccgttct ccatctacgc tcttctaaaa  
7561 ccacgcttct ttcaggctga aattcttcat ctttaaggct taaattttcc ataagctctg  
7621 caaaaagttc taaagttttg tctaaatfff tcttagaaca tttaatataa taatgagtat  
7681 aatcaaagcc tgtgctagcg ttatcaaccg cgccaaaacc cttactatc tcatcaaatt  
7741 cccctgcttt taaattttta gtgcttttaa aattcaaagc ttcaagcata tgagctatac  
7801 cgctttttcc catgatctca tttcttgaac ccactttgta aaaaatatcc acactgataa  
7861 catcactggt tttattttaca ggaaaagtat aaacatctaa tttatttttt aatgtaattt  
7921 tactatagtc tatcatttta aatttgctcc caccgcttca ctaatatgca taaaaccatc  
7981 ttgttttaat aattctataa gagttttatt aatatctctt accaatgaag gccctttata  
8041 aatcaatgct gtataaactt gtatcaaatt agctccattt ttgattcgct cataagcaag  
8101 ctgcgctgct tctatccctc cacttgcaat aagtaaagtc tttccaaata aaaccctagc  
8161 aagctcttta aagaaaatac cgcttttttc agtgatgagt cttccgctta taccgcaaaa  
8221 agttctatta ttatcaagaa gagaataatc tacgcttgta ttggctatga taaagccatc  
8281 tgctcctttt aagatagcat tttcgcaaag ctttaaagca ctatctatag gcatatcagg  
8341 agcaattttt atcaaaaatag gcttatttgt gatttttcta gcttcttcaa gaagatgggt  
8401 taaaaaatca tcattttgaa gttctcttaa attttttagta ttgggcgaag agatattgac  
8461 gataaaaata tcacacaaat ctttaaaatt tctaaataga gtaaaaataat cctccaaagc  
8521 tttatcattg cttgtaatct ttttttgcc tatatttgcc cccaaaggca aaacaaaagg  
8581 ataaattttt gataatcttg cggcgatttt ttccgctcct tgattattaa aaccatttgc  
8641 attttgatg ctttcttgct ttacaaggcg aaataaacgc ggtttttcat ttccctcttg  
8701 aggctttggg gtaaagggtc caaattctaa aaaacccaaa ccaagagctg ctaaaggcg  
8761 tatcatggta gcatttttat caaatcctcc tgctaaacc acaggattgt taaaatcaag  
8821 tcctaacaat ttttgcttca agctatcatc atttacaata taattataag caaaaaagct  
8881 caaagaacct ggcaaagcag catttaaagt tcttaaactg cccttacta aagcatgggc  
8941 attttcagga tcgagtttaa aaagtaaagg tttataaaa ttataaagca tattatccct  
9001 cgttttttta aaattttaac taaatthaac ttaaaaactag actttatcta cttctttggt  
9061 tttaaatffc tgataaagtt cgcaactttg taaaagctct ttattgggtc ctatggcaat  
9121 catttgcctt tgatcaatca ctgcgatctt gtctgcattt tctatagtgc ttaaagctg  
9181 agctatcatt aaaacaagtc tatctttttt taaattttct atagtctcga tgatagcttt  
9241 ttcactttca ttatcaagag ctgaagttgc ttcataaag ataagtaaat caggattttt  
9301 gtataaggct ctagctatgg caatgcgttg tttttgacct ccgcttaaat ttttaccatg  
9361 ctcttttatc tctgcataaa ttctcccat tctttggaca aattcataag cattagctag  
9421 ttttaaagcc ttgataatct tttcttcatt aggctcttcg ctgtaagcta tattttcagc  
9481 aaagctgtcg ttaaaaagat aatatatttg cgttacaagg cctattctat catgcaaact  
9541 ttctatgctg aattcactga tatctaaatc atttaataaa acctcacctt tttgcttatc  
9601 ataaaaacgc attaaaagat tgataataga tgattttccg cccctacttg ttccaacaag  
9661 tgcaagaatt tcacccttat taaattcaaa attaatattt tttaaaacac ttttataagg  
9721 attttcataa gcaaaatcta cttgctttaa ttcaatcctt tctatacttt ctaaattttt  
9781 acttccattt agaatttgtg gttctaaatc gattagataa aaagttctct cacttgctgc  
9841 tatcgcgctt tgtagcctgc cataaagtga agatagtctt tttaaagggtg tataaatagc  
9901 aaaaagtgct gtaataaaag caaaaaagct acccacactc atcgtgccat ggatcacttc  
9961 tcttctccg atgataatta ccgcagccac tccaagcgat ccgataatct ccataagcgg  
10021 actagttaga gcgtcaatgc gagtggattt taaatthaaa cgacaaagct cattgttttg  
10081 tttggcaaat ttttcgcctt ctttgttttg ggtattgctc gccttaataa gctcaatatt  
10141 tgaaaaaatt tcactcaatc ttgagagtaa atcagaattt gtttcttgta tacttctagc  
10201 gtattttttt aattttctag caaaatgcac caagggcaaa atcgcaaaag gcaaaaaccac  
10261 taaagcgaaa aaagccaaaa taggactttg ataaaaatac actatcaaca aaccacaat  
10321 cgttaaaagc tctctaaaaa aatcaggaat gatattagaa actatacttt gaagagcgtt  
10381 aatatcatta gtacagcgac ttaccaactc tccacttcta ttgctgctta aaaaatctag  
10441 atcaagtctt aaaagatttt ttaaaacctt aaaacgcaaa attcttaaaag tatccatccc  
10501 tataaaactt aaataataag tttgcaataa aaaacccaaa ttctthaaaa tataaataac  
10561 aacaagcaaa aaaggcaagg tatagagcaa ggcctcattt ttttcaaca aaatataatc  
10621 taaaataggc tttaaagatg caaaacttcc agccgttctt atactagtaa gtatcatacc  
10681 aaaaatagcg atggcaaat ctttcttgta tttttataa aagggttaa aacggattaa

10741 aacatcttta agagtcatat ctttatacat ttaaattttc tcccaaactg ttccttgtgg  
10801 tgtatcttgc aaggcgatac caagcttaag taagtcttct ctgatctgat ctgctttggc  
10861 aaaatcttta ttttcttag cttcgtttct ttgcaaaatt tgatcttgaa ttttttcttt  
10921 caactcttcg gctacacccc attgaaaata taaattttca tccataaaac caaagccaaa  
10981 aatttttagct agttcactta aggcttcttt gattttttgt ttttaattctt tatttttact  
11041 ttgctgatca agctctaaat ttgcattggg tataaaactca tctaaaagag ctaaagcctt  
11101 ggaaatattt aaatcatcgc ttaagacttc taagatttgc ttggcgatat tgctacgaat  
11161 ctctatatca tttaaaattc caaaatcctc gctctttccc acagcaagtc tttttttaag  
11221 tcgataaaac ttatccaagc gttttttcac attttctaaa tcttctaaag aataattaaa  
11281 atgggctcta taatgagaac ttaaaagata aaatctcaa gcttctcca tgaaatcttt  
11341 caacgcatct ttttaagaaa agctattatt taagcttttg ctcatTTTTT ctccattgat  
11401 ttttcaaaa ccattgtgaa gccaaatttt tgctaattgct cttttgcacg cacaacgaca  
11461 ttgtgctgcc tcatTTTTcat gatgaggaaa taacaaatcc accccacctg catgtatatc  
11521 aagagtatct caaaaaatag aatcgcgat agccacacat tcagtatgcc aacctggctg  
11581 cccttttcca aactcactat cataaaaatt ttcacgaat ttccaaagaa caaagtcact  
11641 ctcatTTTTt ttttcaactt cattaactaag tcttgaaca ttttcttctg tattgcatg  
11701 agataaactt aaataatcct catctttact agtatcaaaa tacactccat cttctaagg  
11761 ataagtaaag ccgtttttac taagcttatg gataagatct agcatgggtt ctatataata  
11821 tgtcgcacga gttttaaact caggctctaa gacattttaa gctttcatat ctctttcata  
11881 atttgctata taaaactcaa caagctcatt taagctctta ccgctttcac tcatTTTTTT  
11941 taaaatttta tcgtctatgt ctgtataatt tctagcaaat tgcaccctat aaccCAAAGA  
12001 aagcaaaact ctacgcaaca aatcaaaaca aacactgctt ctagcatggc ctaaATGCgc  
12061 atcatcatat acagtaggtc cgcataaata aatattgata ttatcttgct caagttcgat  
12121 tttttctttt aaaacactat ccattaattt catcaaaaca ctcttttaac actagcaaca  
12181 atccacaaca aagcctctat aagataagggt ttgatcccat aaagtaaaat tgtaaaaaca  
12241 acaagtccta taatcattaa aaaacaaaat ttaaaagata ttaaagcaaa aaagttctta  
12301 aaaccaaatt ctttgatatt ggcaacaagc aaataaaaag cacttaaaga acttgaaagc  
12361 gccacagcta taacctttaa actctcatct ttgattaaaa aaataaaaag cacagaacat  
12421 aaagcactga taagcaaagc tttaaaggcg ataaaagcgg cggttttttg tttaaattta  
12481 gcatagagcc ataaagaaaa taatttttgc aagccaaaag gcaagagccc taccaataa  
12541 gcaattaaaa cataagctgt gataatacta tcttcatgag taaaattccc tctttcaaac  
12601 aaaagctttg aaatttctaa agcaaataca gaacctaca tacttgaaac aatcaacaaa  
12661 aacttataaa ccgccaaggc tctttgcata aaacttaaag ctaaattttc ttgatcgctt  
12721 tttaaatggt ttaaaatttt aggaaaagaa acttgagtta aggctatagc aaaaagagct  
12781 aaaggaagct gaaaaacgcg gtttgcataa taaagataag aaatactgcc cgtcattaaa  
12841 aaacttgcaa tcgtcgtatc aagcaaagag cttatttgtg tagcagaaga gcctaaaact  
12901 ccatgaaaaa aattgctata aaaaccctct agtttagctt ttgctcgtct aaatttcaca  
12961 cttaatgcca tagcgcgtat tacagggttt tttcgcaaca ccattaaatg caaaatcaat  
13021 tgtgccacac cgcttaatac agtcgcataa gaaaaataat aaagcgtatc ttgaggagca  
13081 tctttatcaa caaaaaatgc ggctataact atacttagat taacaaagc tgccgaaaaa  
13141 gaagtgatga aaaatttttg tctataattt aaaatcgctc ctaaaagggt aaccaaaaaa  
13201 ataaaaaaca aatacAAAA ataatcgcc accaaaggag aagctaaagc tatggtgtca  
13261 gaactaaacc caaaagcaaa aagcttggtg aaaaatgaag aaaaaaagct tactaaaaga  
13321 caaaataaaa aactataaac gctaaattga tacataacgc taacacaaaa agcacctttt  
13381 ttccttgcct ttacaaaatt aggcaaaaag ctttgtccaa atgccccttc ggcaaaaatt  
13441 cttctaaaaa aagcaggcat ttttaattgct acaaaaaaaa tatcgtata aattcccgtc  
13501 ccaaaaaaaa gggcgattag cacatcgcgc gccaaacca aaacgcgaga aaataaaatt  
13561 cctaaagcat tgatgataaa atttttaaac actaaactct tcataaattt tcacaaattt  
13621 tcaaatataa aaactatcat tttactaaa tttgattaaa aattgactat aatattgaac  
13681 ttaaattgaa tatcaaaggg gaaagttttg gcttttagac agaaaatcat ttcctatact  
13741 gaaaatcctt ctgcgaact tttatctgta gcttcaagaa ccaatatcgc tttaaatgaa  
13801 cttgattttc atcttttagc tttttcaaca caatatcgtc ttgaaaatgc cgaatgggta  
13861 aaaattgcag aaaaagatct tgttcttttt gaaaaagatg aaatgTTTTT aaaagaggat  
13921 ttgcaaatca aacaagaata taaaatcgaa atttttcatc aaacaagcca agataaaacc

13981 gcta atgcca ttaagcta atgccaataaa aatttaacaa aaattgttgc tcaaattaat  
14041 tttaatgaac taaaacatca tgaaaaatta gcctttgaac ttttgcaaaa tatctacaaa  
14101 aaaatgttga aacttaaatt tttaataggt attcgtatat ttgattttaa aaaagaactc  
14161 atccgtatat gcaatgaaca caaaaaaat gctttaaata aaaccttaca aatcaatgta  
14221 gccaaaggta ttgaacccat acaaagccaa gatgaagctt tggttttgct ctataaagaa  
14281 aaggctaaag attacacat agatgaaaaa cgctcaggaa tcatagtagt tgatgaaaat  
14341 gaagttgtat taagatataa taaattcaaa caaggtaaag aaggaaaaga cttaaattta  
14401 catactttaa aagttataga tgccaaccaa aacaaaatca aatttaactg ctctcattg  
14461 gcatttaagg ccgtagaata cgaagattac acagaatatt tagcattaaa aaagggctat  
14521 gtaattgaag atcaagataa atttgatatt ggaactttgc ttgaatttaa caataaagtt  
14581 gattttaaaa atataggcat aatccgcgca ggattggata aaaatgtaaa aataaatatt  
14641 agatttatat ctgatatgca agatgctggt aattcaggcg taggaataga atgtgaagaa  
14701 ctcaatatta caggaagtgt cggaagtaat acaaatttaa aagctacaag aatgagaatt  
14761 gaaggcacta cgcacacaaa atctaaaatt tacgccaaag aagcctatat aaaaacgcat  
14821 cgcggttttg ttcaagcaga aaagctaaac atagatctct tagaaggtgg caatgtaaaa  
14881 gctaaagaag taaggattaa aaaaagctta ggcggagcaa tagaagcaga tagaatttat  
14941 atagaacaat tagaaagcaa taattcatgt gtgttttaca ataatgttgt catagaacgc  
15001 tttgaagggtg aaaataataa atttcatatt aaaataaaaa aaatggataa agactacgat  
15061 caagagcttt taaaaataaa aatgaaatt ttatccctta atcacaaaat aagcaaaactc  
15121 aaacaatata ttttattaaa caaaaacaat gttttagata tagaaaaaaa agtcttagag  
15181 cttaaaaatc aagggcaaaa tataccaaat caatatgaga aatttttgaa gaatttttcc  
15241 atacaaaatg caaattttaa caaacttcaa aatcaagaaa aagaactttt agcatataga  
15301 aaaaaaatcc atgatgaact tttagtactt gaggaagatt tatttaaagc caaatttatc  
15361 aacaaaagtg gaaaatggag cgatatgaat gaaattagat tttcgccttt agagcctaag  
15421 gaagatgttt tttattcttc ttccactaaa gaaaatgcaa aatttatagc tttgaaaaaa  
15481 atcatacaaa ataaccaaga gtatatagag atcgataaaa aacttgatta cgaagaaaag  
15541 gatatagaat ggttgttgcc atcgaaggaa taatcacaaa aaaagaacc acttttgcca  
15601 ttataaaatg tactagtggc ttaagctatg gagtttttat ctacttttt tgtgctgcta  
15661 agcttgaac tcatcaaaaa tatgagcttt tcatcactca aatcatcaaa gaagattcta  
15721 acaaatctta tggtttttta gataaagatg agcaaaaaat gtttgaaatg cttttaaag  
15781 taaatggagt gggcgcaagt actgcatggt ctatatgctc aagtttggat gtaaattctt  
15841 tttataaggc tttaaatttg ggagatgaaa gcgtacttaa aaaagttcca ggtattggtc  
15901 caaaaagcgc caaacgcac atcgtagaac ttggagatgc taaagtacaa cttgaaagcg  
15961 tgagcgatga taaaagcgaa gctttggctg ctttgcttc tttgggattt aaacaagata  
16021 aatattaag tgttttaagc acttgcaacg gaaaagacac aagcgaactt atcaaagaag  
16081 cactaaaaaa actagcataa ggaaaattaa tgaactagc gatacttttt ggcggaaatt  
16141 cttacgaaca tgaaatcagc attgtaagt ctgtggtatt aaaaaagtg ataaatacgg  
16201 atttaatat tttttttgct gatgaaaaga gaaaatttta ttttaattcct agtgaaaaaa  
16261 tgaattctaa aacctttagc agtggcgctt atcaaaaaga aaaagagttg tttttaagac  
16321 aaaaggcttt ttgttttaaa agcttgtgga gcgaaaaaag cttagaatta gattgtgtga  
16381 tcaacctcat ccatggaaga gatggagaag atggaaagat agcttctttg cttgaatttt  
16441 ttgatatcaa attcataaggt cctagagttg aagcaagtgt tttatctttt aacaagagt  
16501 tcacaaaact ttatgcacaa agcgttgggg ttaaaactct agattatcaa atgcttagaa  
16561 aaaacaaaa gcaagatttt acagctcatt ttccttgcat tttaaaacct gcgcgacttg  
16621 gaagtagtat aggaatcagc atagctaaaa atgaaaagga attagattat gctaaagatg  
16681 tgggctttga atttgatact gatattcttag tagaggattt taaaagcgat atcaaagagt  
16741 acaatcttgc aggatgtatg attaaagatg aatttatctt ttcaatcadc gaagagccaa  
16801 agaaaaaaga atttttggat tttgagcaaa aatatcttag tttttcaggg cataacgaac  
16861 ttatcgaagc tgatttgagc gaagaattga acaaaaaact taaagataat tttgccaaaa  
16921 tttacaatcc tttattttaa ggtgctttta tccgttgtga tttttctatc ctagataatg  
16981 aagtttatct aatgaaatc aacccaatc caggctcttt agcaaatat cttttcaagg  
17041 attttaacaa aattatagaa caacttgccc taaatataga aagcgaag aagattaaaa  
17101 tcacctatga atttttgcat tctattaatg gacaaaaagg caaattataa agctttaaga  
17161 gaaagtatgt taaattttac ataaaaat tttt atgtatttta ggaaaaat tta tgctttcttt

17221 taaacaagat gaaatctata ctgctacgga agttgtgcga aacttttagtc ctttgatcga  
17281 aaaactaaaa aaaagcgaat cgggcaaaat ggtcatctta aaaaacaata aatttgaagc  
17341 cgttttgctc agtatgaaag aatttgaacg cttgcaaaat gctatgcaac tcttagaaaa  
17401 tatttcaaaa aaccaaagg ttaagatgg cgcttgcaaa tgtgatttat aataatgata  
17461 cttatgagct aagttatgaa attttaaatc aagataagaa aaaatcttta ctcatattgc  
17521 atggatgggg cgcaaacaaa gagcttatga agcaagcttt ttctaaaaat ttaaatgatt  
17581 tttgtcaaat ttatctagat ttgcctggct ttggaaattc aagtgcgcca aaaagtcttt  
17641 atagccaaga ttatgtaaat atcataaaaag aatttttaaa agaaaaaaaaa ctcgatatta  
17701 atatttttct agggcattct tttgggtggaa aaatagctgc tttgcttggt ttggattttc  
17761 aaaaagctca acttgttttg ctttcaaatt caggcatact tgcaaaaaaa tcttttaag  
17821 tacgttttaa aatcatactg tttaaatttc taaaaaatt gggtttgggt aaattttatc  
17881 gttattttgc aagcaaagat ggagcaaaact taaatccttt aatgtatcaa acttttaaaa  
17941 atgtagtgga tgaagatctt agtcaaactt ttgccaaaat cgataacaaa agccttattt  
18001 tttggggaat tgatgataaa gccaccctt taaaaagtgg agaaacaatg cacaagctta  
18061 tcaaaactag cgaattttat cttttagaag gggatcattt tttcttttta aaacattctt  
18121 tatttatagc caataaaatc aaggaaaacc tatgctaacc aatacgcttt attttctcaa  
18181 ttctttatct ttttaatttt gtgtagcttt ttatcttatg agtgctttgc aatggatttc  
18241 ttataaattc aaacgcgtat tttttcacta tcatagacct ttgtggcatt tgtatttttt  
18301 atttttgcct tattttttct ttttgacttt tcctttgtat tcttttagcat attttgcact  
18361 tattcatact ccgattttgt atttttggaa caaaagcata gataaaaaac tcgtctttac  
18421 aagtaagggt aaatggtttt ttgtttttgt atttatctat aatacccttt ttgccatact  
18481 tgctttgcgt ttttcttttc tttttaatct ttttacccta ccctttgctc ttataagtct  
18541 taaaatcttt gagttattta gtaatttata ttttaaaaat aaagccaaag ccaaacttca  
18601 aaacaatcca cagctaaaaa tcatactcat tactgcaagt tttggaaaaa caagtattaa  
18661 aaattttctc tatgagcttt taaaagatga ttttaaaacc tacaaaacgc ctcgctctgt  
18721 aaatacctta cttggcatta tcgcagatat taatacaaat ttaagcgatg atacacaaat  
18781 ttacatagca gaagcaggag ctagagtaaa aggcgatatt gatgttataa cgcgtttttt  
18841 agagcctcaa atttgcattg taggagagat aggaaatgcg catttagagt attttaaaaa  
18901 tatagaaaat acgcgaaaca ctaaacttga agcttttaaat tccaaaagat tggaaaaagc  
18961 ttttttgcct actagcactc aaaaaagtga agatgagctc atcttacttt acgatgataa  
19021 attacaagac attcaagcaa gtcttcaggg tttggaattt aaaatcaatt tagaaaataa  
19081 aacacatgaa tttaaaagcc aaattttagg ggattttaac gctcaaaatc tttgcgcttg  
19141 catactttgt gcaattatc taggtgtaaa aatagaaaaa attcaaaagc aagttttaaa  
19201 aatcaattca gtagaacatc gcttgcaaat catctctaaa gaacctaaat tcatcattga  
19261 tgatgggttt aatggaaatt ataaaggtat gagtgcaagt tacaaaacttt gcaaaagcta  
19321 taaaggacgc aaggttttag taagccctgg tatagtagaa gtagataaag atgaaaatat  
19381 aaaattagcc aaaatcatca acgaatgctt tgatcttgcc atcatcacag cacaagttaa  
19441 tgctgatatc tttaaaaaag aacttgaat aaaaaccatc atactcaaag aaaaagcaga  
19501 tctagtaaag gttttagcaa aagaaactca acagggcgat ttgatacttt tttccaatga  
19561 tgcgcctagt tttatgtaat tttatcttat agataatctc aaaggtaaaa atttttacct  
19621 ttagacttat tgttttttaa aatattgtca gttcttgttc taaatcattt tctattttat  
19681 tgttagaatt ttatgataaa atcagtgcca catttataaa agtttttcac aaatttagga  
19741 gtaaattata tgcaaaaaaa ttctttttta caaatccacg gactcatacc ctttttgctt  
19801 gtagctttta tcaatgcttt tgtggattta ggacacaaga ttattattca aaatactatt  
19861 tataaagttt atgaaggtag cacacagctt cttttaacag ccattgttaa tgctcttatc  
19921 cttctacctt ttatttttaat gctttcgcca tcgggatttt tagcagataa atatcaaaa  
19981 aatcttatca tgaaactctc agcagccttt agtgttatac ttacgattat catttgtata  
20041 agttattaca atggggcttt ttggacagct tttgccctta cttttatcat gggaattcaa  
20101 gcagcacttt attctcctag caaatacggc tttattaaag aattggttgg aaaagattta  
20161 cttgcgatgg gaaatggtgc agttaatgca gtaagtatcg tagctatact ggctggaatg  
20221 agtctttttt ctttaagttt tgaaagctta tatgatataa atcataacag ctcagaagaa  
20281 gttttaaaac aagtcgcgcc tttgggattt ttactttatac ttttttcct tatagagctt  
20341 tacttggcat ggcgtttacc taagcttaaa gatgagataa aagaattaaa atttgattct  
20401 aaacgctatt tgagcggaaa attgctgatg agcaatttaa aacttatttt tgaataaaa

20461 ataatttggc tttgtatcgt tggaatttcg atattttggg caatatcaca attatatcct  
20521 gtgagttttc ccgtatntag caaaaatgaa ctttttggtg aaaatacttt ttttgtacaa  
20581 gtttcttttag gattttcagg aattggggta gttttagggt ccttaatagc aggtagattt  
20641 tctaaaaatt atatcgagct tggactcatt ctttttgtag ctttgggtgt atttttaatg  
20701 gctttaatta tgccctatnt tacaagcttg attacatata gttttatcct tttcatcctt  
20761 ggtttttgtg gtgcattatt tatcatacct ttaaattctc ttatacaatt tcatgcaaaa  
20821 gaaaatgagc tgggtaaaat ttttagcagga aataacttcg tgcaaaatat cgcaatgctc  
20881 acttttcttg ttttagcaac tttatttgcc aatttagaaa tcaatgtggt ttattttatt  
20941 tacttcatca ctcttgttgc ttttttgggt gcgatttatg tagtctttaa actccctttt  
21001 tcttttagtaa gaatgctttt aagcatagca tttttagggc gttatcgttt gcttgtggaa  
21061 ggctttaaaa atatccctga aaaaggcggc gctttgcttt tgggcaatca tatttctttt  
21121 attgattggg ctatagtgc aatggcaatc cctagaaaaa tttattttgt catggagcga  
21181 agtatttatt ctaaattggta tattaanaatt tttcttgata aatttggcgt cattcctggt  
21241 tcaagtgcag caagcaaggc tagtttagag cttattgcag agcgtattaa acaaggggat  
21301 ttggtttgtc tttttcctga aggtgtgctt tcaagacatg gacaactcaa tgaatttaaa  
21361 ggtggatttg agcatgtttg ctcaaattha gaagaagatg atggagtgat cttacctttt  
21421 tatatacgcg gactttgggg cagtactttt tcaagaagcg atgaagaatt ttcggccaga  
21481 aatcgcacct taagcaaaag aaatatcgct atagcttttg gtgctcctat gtctttacac  
21541 tctaaaaaag aagaagtaaa ggctaaagtt tttgaacttt cttttatggc ttggaaatct  
21601 caatgcgaag caatgcatac catagcaaga gcttttatca ccagcgctaa aagaaatcct  
21661 agcaatatag ctataatcga ttctatagca ggggcgatca gttatagaaa attactgagt  
21721 cttagtttta ttttaagcac ccttataaaa gaaaattcaa aaaaaatcaa taacaatcct  
21781 gaacgcggat cttatgcacc taaagaagaa tgtgtaggaa ttttactccc tgcttctttt  
21841 gctagctctt tactgaattt aagcgtcttg cttgcacaaa aagttgtagt aaatttaaat  
21901 tttactgcag gagaaaaagc tttgcaagca gcagtaaaaa gcgctcaaat ttcacaaatt  
21961 tatacttcta aaaaattcct agaaaaacta gaaagcaaaag gcgtctctct taattttggc  
22021 gaagaggtaa atcttatcta tatggaagat gtggttgaaa tctttaaaaa acaaaaaagt  
22081 aaaattttag caatgatggt ggctgttagt attttaccta gctttatatt aaaagcgatc  
22141 tttgctcctt ctaagaataa tctcgccata gcagccattc ttttttagcag tggtagcgaa  
22201 ggcaactcaa aaggcgtaat gttaaacaac cgcaatattt taagtaatat cgctcaaatt  
22261 tcagatgtgc tttgcacaag aaataatgat gtgatacttt catccttacc cctttttcac  
22321 gcttttgggc taactgtgac tacatthtta cttttacttg aaagcattaa aagtatcact  
22381 tttgctgac caactgatgc tttgggtgta gcaaaaagctg tagccaaaaa caatgttacg  
22441 ataatgtgtg gaacctcaac tttcttagga atttatgcta gaaataaaaa gcttgatgcc  
22501 attatgtttg aaagcctaag agtggttgtt tcaggagctg aaaaacttaa aaatgaagtc  
22561 agatctgctt ttgaaatgaa atttaaaaag actatttttg aaggttatgg agcgactgaa  
22621 accactcctg ttgcaagtgt gaatttacct aatcgctttg atgcagatta ttggatagtt  
22681 caccgcgcaa gcaagaagg aagtgtgggt atgcctttac ctggaactgc ggttcgcatt  
22741 gtcgatccta atacttacga aaccctaaaa acaaatgaag atggactgat acttataggc  
22801 ggacaccaag tcatggtagg atatcttaac acaaaagaaa aaaccgatga agtcatcaaa  
22861 gaaatcgatg gtataagatg gtataacact ggtgataaag gacatttaga tgaagatgga  
22921 tttttatata ttgtagatcg ttattcacgt tttgcaaaaa ttggtgggga gatgatatct  
22981 ttgggtgcct tagaagaaga aattgctaaa tttatcgata caaatatagt gaaattttgc  
23041 gccgtagcct tagaagatga gaaaaaaggc gaacaagtgg ccctgcttgt agaatgcgat  
23101 gaagaattct ttgaaggtgt ttgcgaagcc ataaaaagct caagtatgcc tgctatthtc  
23161 aagccaagtc gctactthaa agtagaaaaa attccacttt taggctctgg gaaagtggat  
23221 ttaaaaggcg ctaaggaatt agcaaaaagc ttgattthaa ataacaaatt tttagcaag  
23281 agataaacac tctttgcttt ttaattttct tatcattcct tcatatgctt aaaaatttac  
23341 accaaaacc aaactaaaat cggcatagaa ataaaagcaa aaagcactcc aaaagccaca  
23401 gaacttacag ctagattgct atctaattta gccttcatta ccatagccc tgctaaagtc  
23461 atggtaggcg tggcgctttc tatgatggca actataattg aagcttgcatt ttgaaaacca  
23521 aaaagcttta ataaaagcac aaaaatcaaa ggtgctaaaa ccatttttagc taaaatcaca  
23581 agaattgtag gcttataggc ggttttaatc gccataaaac caagtcccaa acctatagca  
23641 aaaagtgcata ctggagtggc cgcaccgcca aataaacgaa tgggagagaa aataaattca

23701 ggtaaggata ttaattttaca caaaaaaccc aaaagcaaag ccaaaaaagg tggaaaagaa  
23761 agaatttttt taatattttgc catcaggcctt actttttctc cacttcccaa agaaaggata  
23821 aaaggcccta taagagaaat aggcaaagta gtagctaaag catcataaag tattactttct  
23881 gcaccaaatt gcgcattagc aaaaatgcct tcaatgatag gcatgccac aaaaatagta  
23941 ttcccaaagc aagaaagtaa aaacatactc actaaagtgt cttttgaaaa attaaaaata  
24001 aaacctaata atacaactac aaaagcagca agagcacaac taaaaaatcc tataaatatc  
24061 aaaacaacca aagaaaagtc aaaattttaa tgataagcct tatcgaaaat taaacaaggc  
24121 aaagcaaaaa cgatagcaaa atccaaaaag gttcttgctt gcttttgttt taagataccc  
24181 actcttttag caaaatatcc acccgcaagc aagataaaaa tcgtaaaaa aggagtaaaa  
24241 ataaacatac tttatatcct cttcttaatt tattacttat aaaggtaatt ttaaaaatgg  
24301 aaaaaattat attctttata attaaaagag aacttaaaat gttttaagtt ttatattttt  
24361 atatgaaaat ataaaacttg cttatctaaa aatactcaat tttttatcaa aatactatgg  
24421 ttttattttt gtgtataaaa attctatcat caaaaaccaa atcaagtgcc tttgaaagca  
24481 catttttttc tacattgcgt cggccttgct gcatacttg ccaagtatac tcatgactta  
24541 caggtaaaac tgcttgagtg atgattggac cttcatcaag attattatta acaaaatgtg  
24601 ccgtagctcc aataatcttc acccctcgtt caaaagcctg cttgtaagga tttgctccta  
24661 taaatgcggg caagaaagaa tgatgaatat ttactatctt tccttcaaaa tgtttgacaa  
24721 aatcagggga taaaattctc atatattttg ccaaaaaccaa ataatacaat tgatattctt  
24781 tcaagcattc taaaacttgt ttttcttggt ctttgcgttc taaattttct gcaactgatg  
24841 gatgataagg gatttcaaat ttctccacta agtttttaag agtgtcgtga ttagaaatca  
24901 cggctttgat attggcctca agctcattac tataatgctt aatcaataaa tctcccaaac  
24961 aatggctttc tttggtagca aaaacaataa tatctttctt tcttttttca caaagctcta  
25021 tataagcttc ttcgcccaac atcgctcaa gtgttccaac aaaggctttt ttatcaaact  
25081 caccctctaa aatagcacga aagaaaaaca tttcttcgcc tacaattca tcatttttta  
25141 ctatattaat atgatattta aaaatcacat cagaaatgcg ataaatcaat cttttttgat  
25201 cttgggtgca aatttttaat acagaaatca ttttaattaa ctttttaata tattcataca  
25261 attcattttc tcttgcttct ttgagcttta aacctaacat tttaccataa attccagctt  
25321 cgataaaatc ttttgctaaa atacttgttt taaattgatt ctcatagagt ttgaattttt  
25381 tagcccgtt tatgcgctct tcatcccaa gcccaagcca ttcctttaa ggcatatcca  
25441 aagcaatgct tgccaaatca aaatcgctca ttttatcaag gtaaaaggct tgatttgcct  
25501 ttttgaaata ctcttttttt attttacttt ttttaaaaaa tcttcttta tttaaattaa  
25561 aaaaatttaa atacaatac aaaaacaaag catcatcttt aatcacctt ctactttggt  
25621 taagcagagc ttgaaattcc atgcttttaa aagtactatc aaagccaaaa acttcctttt  
25681 ctatcttaag ctcttgtaag ttttatagc ccacttcaag tttggagctt ttaaaaaatt  
25741 tataaagctc agcattgatc ctatctctgc taagatcttt tatattcatg ctttgcatta  
25801 attttaagct ttcactgctt attttaaaat caaatcttga agcaaaagcc actgctctta  
25861 aaattcttaa actatcttct tgaaaactcg ttagatcaat atgccttaa ataccctggt  
25921 ctagatcttt taaccctcca taaaagtcta aaaattcatc attaaaaaga ttgatcatca  
25981 tagaatttat ggtaaaatcg cgtcttttgg cacctaattt ttcattcttg caaatttgca  
26041 cctcaaaacc cgtatgtcca taacctgttt tgttttcagt tctagcaaga gcaaaatcat  
26101 agttttttaa tttatataca aaaaaacttt ttccaaagtc ttgtgagcct agttttttca  
26161 tcattttttc aaaatcacta ggacttacat cataaagctc tatatcataa tcataaattt  
26221 ccaaactaa aaataaatcc cttacactcc caccaaccaa ataagctctt tgggtataag  
26281 ggcttaaaaa atcaatgaca aattttaaat ctgcattatt ttttaagctt atcttcgatg  
26341 tttgcaagta aaaactctaa aaaattaata gttaattgaa gtctatgttc taaattctcc  
26401 tcttttagtgc tatttaaac ttcaaaaaga actaaaattc tttctcttag gtgttttaaa  
26461 aatatacttt cattaagagt ttgcacttct gctataaac tagggtttaa aatttcactt  
26521 tgcaaaacag cttcttcttt aacaggttct ttatcttctt gatttaactc atctaaattt  
26581 ttaatctctt cttgaatttt ttgctcttct tcaaattttg ccatagaaat tttatcttct  
26641 aatttttgct ccacaatagg ctcttcctta agctcaaccg taggcataatc ctcttgaatt  
26701 tgagtctttc taagctcttc ttgttctttt agaatttcac tttgccttct ttgttcttcc  
26761 atgatagagc taacttcact gatagttttc tttgctaaat cttctaaatt catattttta  
26821 ttaaccacct tttaaattca ttgatctctt catcgctttt catattttata aaaaaatcaa  
26881 gcatttgagt gtttaaatcc tgatgcttag aacgaaaccc gctaagacga cgcaccgcat



26941 cgattgcatt ttgattatta ggatcttctt ttaaaatatt tttataaatc tctaaagcct  
27001 catctttaag cccttgggct tcataaatag aagcttctgt aactgtgttt ttcattatct  
27061 ttcctaatat ttttttaaat ttttagcaaaa agcattttta gttaaacttt atataatata  
27121 ctaagagcca tcacaaagat aaacaaagcg ctgattttat tgattttatc caaatgctta  
27181 ttcataaaga tcttaaatat acttccacct aaagcataaa gacttaaaga acaaaattct  
27241 atcaataaaa taatcaaaag caaaacattt acactcacat gaaattttta aaaagaaggc  
27301 aagatagaaa acataaaaat ccatgctttt ggattagaag aagaagctat aaaaccttga  
27361 acgatgagag aaattttttt cttattgatg attttttctt gagtaatttg actttttgat  
27421 ctaaataata caaaagcgat atataaaaga taaaaagcac ccgctatttg aaagaattta  
27481 aataaatttt cataaccgca aacaaactct atcccaaag cacaacataa aaccaccaat  
27541 gccaatccca caagctcgcc aatatcatc cataaagtat ttttatatcc taaagaaagc  
27601 cccaaggaaa aagctagact catacacaat cctggaagta aagaaacgga aacaaaagtt  
27661 aagataaata aagtatagtc cattaaaaca atcttaaac aaacataata aaaatggttc  
27721 ctaaaataat actaagaagt gcatttttaa aaagtatatg tatcaaaaat accaaaatac  
27781 aagaaataat aaaatcaat ccataaggat aagaataaaa atccacctca taaaaggat  
27841 aaaaaataa aatgatgata ataaccaaag gcatattatg ttgcacaaaa agcaaagat  
27901 gattttcttt tttgttttta aacaaaataa aagctaaaac acgagttaa taagtcgcca  
27961 aagaagctgc taaaattgca tacaagatat ttttatctaa catatttttt tccaaaaatc  
28021 aaaatagcca aagcgataaa aatacaaaaa gctagcatat aaggcttatc tatacaaaat  
28081 aaagcaaaaga gtgctacaaa agaagaataa agtaaaattt ttaaattagg attttgctta  
28141 taaagctcat aagctaatac aacaaaaaga gcatttaaac tgaattctac cccgaataa  
28201 tcgatattta atccttgctt aaaataataa ccaaaacag aacctattac ccaataaatt  
28261 tgatttaata aacaaactt aaacataaca aacgatcttt gcgcacggct aagatttttg  
28321 attttctctt taatagagct taaaagagca aaactttcat ctgttaaagc aaagataata  
28381 tagtgtctta gaaaattaat ggattttaac tcttttaaaa gcgataaagt gtagaaaaaa  
28441 tggcgaaaat tcaataaaaa taaagtaaaa aaaatcatca aaaaagatac attttgcgcc  
28501 actaaagcta ctaaaagaaa ttgccagca cctgcataaa taaaattga actaagcaaa  
28561 attcaagca aagaaaaatc tttgctagca gctaaaattc caaaagcagc tctaaaggg  
28621 atataacca ttaaacagg gatagtaaga ataaagagtt ctctttgctt catttcttct  
28681 cttgaataa atgttttaga tattcttctc tttgtttgtc taaattcgga tcagttttat  
28741 taatttgctg ttcttctttt acttttagcat tttcatcatt aaaatacaaa taatcaatac  
28801 caaaaataat agctataata ataagcaaag gaattaaaa aacctctaa aaactttaat  
28861 caagaaattt gattataaat gctgccataa taacgaatat tttcagcatt ttcatttttt  
28921 tctatggttt gtatagctcc actactgata gctttttgga tatctttatc caaatcttga  
28981 taagaaaaaa ccatatttat actgataata tgaggtaatt tttcaagcat tttataagac  
29041 tggagtctt tttctaaatt ttcactttct attacaacga taattttttc attttcacaa  
29101 agttctattg agcatgatgg aatttttaaa atttcttttt ttaattcttc tatatgttgt  
29161 acttttgcta caatcaaac actagaaaga ttcactaaa ctctaaata caattttatc  
29221 tccaaaacct gagacaatca atttctttt gttgataaaa atgatgattt cactcattaa  
29281 attttcatcc ttgaaaattt taatggtttt tagggtattt gtatcaaaaa cctcattaa  
29341 accgcttca ttatcactat acgcagccaa tttcccacta gggcttaaag cacaagtata  
29401 aattaaaaaa tctttttgta aaaaagattg tttctcatt tttaccaagc ctatacgctt  
29461 atctgtacca caacttaaaa tagtgtcatt tttcaaatca acttgataga tattatcttt  
29521 gtgcatttta tcatagtttt ttaatatatt ccattttttt aaatcaaaaa gctctacttc  
29581 tccactttca aatcctgcca caagcttagt tttttcttca tttaaagccg catcatttaa  
29641 gctagaatga gagaatttaa actgatttat acgctttaa tctttattta ccaattctat  
29701 tttagagccc aataaaatca aaagataggt gttttcatct ataaaaaag cttccttaac  
29761 actactttct tgaagtgttt gaatttgaag atttttatca taaagactta aattctttcc  
29821 tccaaaatct cttcactaa gtacaaaag agaattctta taaacatcga tgctataaat  
29881 tctagcaaaa tcgccttcat aataattctt aatttttaggc aaagataaaa gctcttttaa  
29941 acttttatct tttaaattat actcgtaaat ctgccttta tcggtgccta tatatagctc  
30001 ctgctgatca agctttaaag ctgtaatat tgaattaagc tttagctcat aagcaggaga  
30061 taaaatatat aaaaaactta aatgaaaag aatttttttc attattttac tcaacacct  
30121 cattaattac atcgattaaa ttagaacgat tttttaagcc ttcattttta aattcagctt

30181 taaaactatt tccaaccaa ggttttgcac cactttgtgg aacatggcat tgggtacaat  
30241 taaaacgtga atcactgatt gcatcccctg tagttttatt ggttctaaaa tcataataat  
30301 ggctcgcagg aagaggagtt gcaccaacat cgcttgcaat tgctttatca tgacaagtaa  
30361 ggcaggtggtt attatctttg gtaataggca acatatacctc gatagtatgt gaaataagcg  
30421 gtgggtgcatt ttcaaaagaa cgctcaaaaa ggatagattc acctggttgc aaggtagtaa  
30481 aactagcatc gaccaaactc accttatttt cattttctaa gcttgctttt ctaagtccaa  
30541 tttgctctga actcaccaca ctatttaacg cacaagcggc taaaaacatt gtagcaacac  
30601 ttgctaataa aactattttc tttttcatca ttttttcctt aaatcaaata tattaataat  
30661 taaagcatca tcattacata cttccacaca gcgtccacat cttatacatt caccgaatt  
30721 tacactcgca ctttctttag ctatcatcca aagaacttgt ttttcaggac aaattccaat  
30781 acacttataa cacttagtgc aattttgatg attgtgcttg attttcaaaa gtgcaaaaacg  
30841 agagatgaga gcataaaaag ctcccaaagg acacaaatgc gagcatatcg ccctaggact  
30901 taaaaaagta tctatacaaa aaagtataaa agctacaaat atccaagaag tagtgccaaa  
30961 aataattccc ctatgtataa tgcctatata agatatgctt tcaaatacag gcaaagataa  
31021 tacaaaagaa agaattaaac tcaaagccaa aatataatat cttagtttt tacttaaaat  
31081 taaaacctta ctctgtttaa aagccatttt agaacgaaca aaagcagcaa aatcagtaat  
31141 caaattcaca ggacacacc aagcacaana agcacgacct aagaaaactc cataaagaat  
31201 caaacgatc aatgccctta taagtgccat taaatctaca ctaaaacttg ctaataaat  
31261 ttgaatcact gcaaaaaggat cgcttaaagg tagggtgtta aaaagcctag aggaacttaa  
31321 atttctttt aaaataaaat ctgtagcctt aaaactaaaa agagctaaaa ttccgatttg  
31381 aacgatgctg cttagcgatta aatacctcat caaatttccc cctcatttaa ataatttgtt  
31441 gcctttttag catcaaaata tttagaagta tctgcatctt ttatacgatc ttctctctct  
31501 tgatcccaac cttttacata atgcgaacca gccttgccca aaacatactc gcgtggtaaa  
31561 acacgaatag caggcttttc tgtaatacaa gcaagctcac aaagcccaca gcctacacac  
31621 acttcatgat cgacactagg caataaaaag gcgtgcttag cagtgcgttc attgctttta  
31681 agtcaagtt ttaaagccct atctatcaaa ggacaagccc tataacaagc atcacactga  
31741 attccccaat gtgctacaca agaagcacta tctacgattg caatacccat ttttaagat  
31801 tctatgccct gctctaaatg ttttttatcc aaagcatcgg ttggacattc cttgatacat  
31861 ggtatgtcct tgcaaagata acaaggaatt tctctagctt taaaaaaagg agttccgttt  
31921 tttgcaactat cttagcaaagt agcaagtttt aaggtatcgt atggacaggc ttttacgcac  
31981 aagccacaac gaatacattt acttaaaaaat ctgcttcat cttcagcccc tgggtggcctc  
32041 aaggcataat catcatcagc ctttaggctt aaatttgcca aaaatccacc cgcagtgcaa  
32101 agacacaagc ctttaaaagc actagcaaaa aatttcttctc tatctttcat caaatcaaac  
32161 cttcatctta agctttataa atttttaccg cacatttttt aaagtgcggt tgtttagaaa  
32221 gcggacaagt cgcatctagg gtaactttat tgatataaac attttcatca aaccaaggta  
32281 cataacaag ccctacaggc ggtttgtttc taccacgcat atccactctt gcttttacct  
32341 taccacgacg cgattctacc caaactaaat ctcttgatt taaaccaat ttttcgcat  
32401 ctttttcaat catatacaa agtgcttctg ggacagcgcg gtaaagctcg ggcacagca  
32461 tagtcatagt cccgctatgc caatgctcca aaacccttc agttgaaagc caaatggat  
32521 attcttcaat tggcttttca ggtgccttca taaatggtct aaagaaaatt ttagctttat  
32581 ttttaatact atgctctttt tcatccttag gagctatcaa atctccattg gtgagcattt  
32641 tattaattc accataaaaa gcaaagtctg aatttggagc agctttttta gcataataat  
32701 caaatttagt attaaatctc cattgtgttt ctttgccatt taccaccggc catcttaaac  
32761 ctcttacttg atgataagtg ttaaaatcgg ccaaatcatg accatgacct aagccaaatt  
32821 tacggtactc ttcccaaaga ttttttgaa cgaaaaagcc atatctttta aattcttttc  
32881 catcactgcc ttgaattttt ctttcatcgc ctttaacttc gctattatca aaatctttca  
32941 taacagcatc atttgaagta aagctttttg cttctttatt ggcaataaaa acatcaaaaa  
33001 gtgtatcatc ctgctataa cccatagctt ttgcttcttc taatacactt ggcaaaagtaa  
33061 gcttatcatc tactttttgc tctttccaaa cttctttaag tttaaagcgt tttgcaaatt  
33121 ctaaaatttg ccaagtatca ctcatagcag caccacagg taaaacttgt tgcttccagt  
33181 gttgagttct tctttcagca ttaccataag cgccccattt ttcataaatc atcgcgcttg  
33241 gcaagataag atcagctacc tttgctgaaa ttccaggata acaatcgtt acaacgataa  
33301 aattatccat ctctctagct gctgcgatcc agtgggtttgc atttgcagta ttttgccatg  
33361 gattattcac ttgaacccaa gcaaatttaa tcttaccatc ctctaaatct ctcataatac

33421 caagataagg cgaacctggt tttggattga ttgtttttgc aggtactttc caaatttttt  
33481 ctgaaatttc tctatgtttt ggattttgcca caaccatata tgcaggcaag cggtgagaga  
33541 atgttcctac ctctctagca gttccacaag cacttggttg tcctgttaaa gagaaagctc  
33601 cgctacctgg tttagcttgt ttaccaagta aaaaatgcac catataagct tgctcattta  
33661 cccaagaacc tcttgtgtgt tggttaaagc ccatagtcca aaagcttacc actttacgat  
33721 ttttttctat atataaatta gctaattctt gaagtttttt cttgaaatct tccaaagatt  
33781 cattatcatc acccttggct acttttgcag tgtattctaa agtataaggc gctagacctt  
33841 ttttgaattc ttcaaaagag atttcccaat tcttatcagc tacaccttga tgtttcattt  
33901 caaatttatc acccgctttc acaccaagat aagaaagaga agtggcttct tcttcatcta  
33961 aagtgattgc attttctttt gcaacgggat ctttttact ttctttgaat ttaggggtgat  
34021 ttggattatt tctcatacca taaccaatat ctgcatagcc tgttgcaaag acacaatgat  
34081 cttaataaaa ttttttatcc atagcttcgg gatgattata aacaatctct cttgctatat  
34141 agttccaaat agctaagtcc gtatttgggt tgaaaatgat ttcaatatcg gcaatatttg  
34201 aagtacgatt agaaaaagtg cttagattta caactttgac cttatcgaga ttgcttagtt  
34261 ttctatcgct aactcttgac caaagtatag ggtgcatttc agccatattt gctcccaag  
34321 tgatgatagt atcagtaagc tctatatcat cataacagcc tgatggttca tccacaccaa  
34381 aagtttgcac aaaaccaacc acagcagaag ccatacaatg tcttgcatta ggatcaatat  
34441 tgtttgttct aaagcctgct tttgcaagtt ttaaagctgc atagccttct tggatagtat  
34501 attgaccact tccaaaaatt cctacaccgc ttaccctag ct cattataa gcttttttaa  
34561 attgcttttc catctcatca aaagctcttt gccaaagaac ttgtttgaat tttccttttt  
34621 tgtcaaattc tcccttgtca ttcacacgaa gcaaaggcat aacaagacga tcttctccat  
34681 acatgatttt agcattaaaa tatcctttta tacaattaag acctcgattt acaggagcag  
34741 caggatcgcc tttgattgct acaatcttac catcttttct agctatcata attccacagc  
34801 ctgttccaca aaacctataa acggctttat cccatttcca ctcttcttct tgtgcacca  
34861 atactgggct tggaacacta agacctgcaa cactagcagc actcgcaata gcggtatttt  
34921 taataaaatc ctttctattc atactcta at cctccaaaat aataaaaaatc attttattat  
34981 aaaaaataga aaataaaatt atcttgaatt ttttataaaa aataaataatt tcaaagccct  
35041 attttatagg acttttattc tccttttatc atttttgaaa taataaaatt atatacaata  
35101 aaataaacta gaaagcacta atttgacaaa aatataaatt aaaaaatatt ttgttgatga  
35161 tttattttaa aagctaggag agtagcccca ttggggcttt atggataaaa aattaatgac  
35221 aaccgcatcc accgcagcag ctagaaccgc caaaaaatgc atcaagtttt gcaatatctg  
35281 gcatttctgt cacttcgctt actagttctt tataagcaat tttgccatct ttgattacaa  
35341 atacagcag agctaaaaga ctttctagtg gaccttcacc gatcaatact ccgtattttt  
35401 ctccaaattc ttttgctaca aaatcgctag caacgcttag attttctata cttcagtg  
35461 taaaaaatct acccatagca aaaggtaaat ccatacttac aaccacaact tctgctccat  
35521 tgtagcttgc tacttttttg ttaaattctc ttgcttcagt tgcacaaact ggagtatcca  
35581 agcttggag acttaaaaca atttgtgttt tacctgcagc accgatttca atcgactta  
35641 agtcttttagc tttaagctct accttaggag catctgctcc aacttctact gaatttcctt  
35701 taagttttac tgggtttcct ttaaaattha ctgaactcat ttgtcatcct ttatttttat  
35761 aaattgaaac atttttgtaa ttaaatattt caacaattat tatatcttaa taattattat  
35821 taattcttta aatgtgtgac ttaaaatcag tcaacttcat tccaagcatg ctttttccaa  
35881 atttcttgag cttctttact ttgaataaat ttcacaaatt ctaaagcttg tttgttttga  
35941 agaccttttt tggtaggaat tatttcagct gatcgataaa ccactgcttt tcatcttcg  
36001 ataaacaaag ctttatctcc taaagccttg gcccaatgtg accaaatgat taaagcatct  
36061 atgtttggat tattattcca ctcatctatg gctattttag aattttttag ataaacttta  
36121 atatttttac gcaacttgac taaattttct cttttaccat tttttaaagc catatcttcg  
36181 taaagtccaa cttgccccgc accatcaaca accataacat ttacattatc ttttaaaata  
36241 tcttcaaagc ttttgatatt ttttgggtta ttaggacgca cgatgatgcc tgaaggacgc  
36301 atatttaaaa caactaaatc ttctaatttt aagctaggaa ttcttttgat aaatccatcc  
36361 atcatagaag tattgcctga aaaaatcaaa tctgcatctt ttttagcctt tttaaacct  
36421 gatggagtag gacctgcagt aactacaact ttttctttgg tttttcttc aaatttta  
36481 gcaagttctt tcatagctgg cgcaggacca ccaggacctt aactaaaac ttcggcattt  
36541 aaaaaacttg ctgcaattaa acttaaaaaa aaatattttt tcataaatta aacctttctt  
36601 taatgatatt aattttga gaaaatatta tcaatctata gtttaactct ccttgcaaag

36661 ccctgcttct ataagaaaac gcgaaggtgc aaaagcggtt tttttatfff tatcgtatff  
36721 tgcataacta agataaagta tttttttagc cttgtttact gcaacataaa aaagtcttct  
36781 ttcttcctcc aaacttccgc ccatactcat aagtttttgg tttggaaaa gcccttgccg  
36841 aagatcaatt acaaatacca agtcaaattc caaacctta ctgcatgca cactcagtaa  
36901 atttacacc ttgccattgc tcatctcgct tgcacctagg gttaagaaat tatagtactt  
36961 ataaatatca ctataatfff tagtgagttc ttttaagaca ttaaatttca tttctatctt  
37021 ttctaaatff tctttctttc ttaaaagatc tacttgtccg gctttatffg ttgctctfff  
37081 gatggctagt tcttcacaaa tttccttata aaaagaatff tcacaaatta aattaaccaa  
37141 ggctaaagaa tgctttgfff ccatagcctt ttttaagaaa aaataaatff tttctaaatt  
37201 ttttagcacac aaatcattga tctttgaaag ctttaagata ggatgagcat taaactcact  
37261 ctgcaatffa aaacgattff cactggctaa ttcctctaaa tccgcaaaaa gtccaagctg  
37321 gtaatffctt ttttgatggt tttgcaaat cacactffta tcaggctcta aaaaaccctt  
37381 tatcaagcta ccatgaccta atfftaaaag agcgtcaaaa atffctfftg ctaaaactcc  
37441 acctactcct ttggtgtatt gaactaaatg aataaatgcc atgatatcct taggatttac  
37501 cacaagagca agcatagccg taaaagctff aacctctaaa ctttcaaaaa aactcccgtt  
37561 tcctffttct acacttgcaa tcccttgctc tcttaaggct acttcgatac catctgcact  
37621 cgaattattg cggaaaataa cggcaatff tccaagctc actccgctag taagtatcat  
37681 ttttagctata ttttgatact gatcaataa tcttcaaaa gttagtaaag aaggagctff  
37741 aaattcatcc ttccttgtaa ctataagttc ttttgatag agtctffcat tatttaaaat  
37801 cacctatff gccaaagcta ggatacttct tgaagagcgg tagttffttg ttaaagaaaa  
37861 aatffgagca tccttaaaac gctgcttaaa tccacctatg atattgatat ctgcccatt  
37921 aaaagcataa atacfftgat cataatcgcc cacacaaaat aaactcttac tctcaaaagc  
37981 ttcgattaaa gaactctgaa gtgcattagt gtcttggtat tcatctacca aaatffcatc  
38041 aaattcgtat tttffttcat ttaaaagagt ttttaattc aaaagtaaat cgttaaaatc  
38101 tacataatta aaacgctff tttcttcgct atatffctff aatatactt cataaatttc  
38161 cgcataaata ctttgatctt cataatffat acaaaaccaa tggtaaaaaat cttgatcata  
38221 agccttgfff tgaataaag aatataatc atacaaatag cttggctgat aaggttffat  
38281 atcgcttaaa tgcctaaaag tctffttffc ataaacgctc ttaagtaagg tttttaactc  
38341 actggcctgt tttaaaacca catctffgtt tgcgctffta agcaaagtat aggctgtact  
38401 gtgaaaagtt cctgctaaaa tttffctgt gatgffttta tcaaaatatt tcccaaacg  
38461 acttatcatt tctffactag ctttattagt aaaagtcaaa agcatgattt tttgcccga  
38521 tataccctgg cttaacagat aagaaattct tgcaactatg gtagaagfff tctctgtccc  
38581 cgcgcttgct atgatcagat tgtgtccaaa atffgcagta gcagctaaat actgctcttc  
38641 atttaatcta gaaagtggca tttffttcct taaaagcac gaattataga aaaaaatgc  
38701 ttaaaaaat aaaaatffa catttatffa tattaatata tagtacaata ttcaatffat  
38761 tttatffgtt aaggaatfa agatgaatff taaatfftt tctatfftg taggaatff  
38821 aatffttgta atattaata ttagtgggac ttatffctat cttfftgagt atffcaaacc  
38881 tagctataca cctataacac aaacttcaac agaacaaaac caatacagca ataatactta  
38941 tacaacaact caaaactct atgffttccga tactacagat acaataata atgaaaatgt  
39001 aaatfftagta caagataagc aagatgaaaa ggatacaaat aacattatta acgatgagaa  
39061 taaaagtatc acaaatctt ctcaaatfac aaaaccaa atgaaaaaa aactagcagc  
39121 aatfgaaaaa gaaatcagta aacagcaaaa aatfftagaa caagaaaaaa tatttaagcc  
39181 tcaaaataca aataacaata aaacaaatfa tcaagctaaa aaactaagcc cagcgaaga  
39241 atacttaagc ttaggaaaaa atagtcgcct tgagcctcaa ttaagtacag aaaatatgaa  
39301 agtttatgta cttgatggta aatffcttaag cgattataga atcaagctff tgaagatat  
39361 gtttagcaatt atagaggata attccaaaga ctatffctt agcgtffttg tcaaatgct  
39421 acctaagggg gagatgagtt taactatffa caataaagat atfftttct ccgatatgaa  
39481 aaaatcttat aaatatataa gcatggataa aatffcacct tatatfaaaa ccctgaagt  
39541 acttaatcaa tatgtagccg gtgaagaaat tatagaaaga tttaaactc aaactaaaaa  
39601 agaaggaaaa ggaagtgatt tttctaagca cataaatagc ttaaagctg gtcttaataa  
39661 ggctcaatac tttffttcat tttgtgaaat tatagaaat acttctgtaa aataagccgt  
39721 ctaaaaaggt aaaaaaat gtatgataaa agcatagaaa agacttatta tcaatffgc  
39781 gaagagccg gatatfftga aatcgatgga aataaagcca tacaagaaaa aaataaaat  
39841 tttgcatca tgatgccacc gcctaatgta acaggcgtff tgcacatagg ccatgctffa

39901 acctttacc tgcaagatat cataacacga taaaaagaa tggatggcta taaagttctt  
39961 taccaaccag gacttgatca tgcaggcatt gccacgcaa atgttgtaga aaaacaactt  
40021 cttgctcaag atatcaaaaa agaagaatta ggtcgtgaaa aattcataga aaaagtttgg  
40081 gaatggaaag aaaaaagcgg tggcaaaatc ctagatcaaa tgagaaccct aggaatcact  
40141 cctgcttgg gtcgcttgcg ctttactatg gatgagggtt tggcaaatgc agtaaaaaaa  
40201 gctttttag aactttacga taaaaaactt atcgtgctg gaaattatat gatcaattgg  
40261 tgcactcac atggggcttt aagcgacata gaagtagaat acaaagaaaa caaaggcaaa  
40321 ctttatcata taaaatacta cttaaaagat agttagaat acctagtcgt agcaacaacg  
40381 cgtcctgaga ctttttttgg cgataccgca gtcattggtt atcctgatga tgagcgttat  
40441 aaacaattta taggaaaaga actgatcttg ctttaagca ataaagccat taaaatcata  
40501 gctgatgaac atgtagaaaa agaatttggg acaggggtt taaaggttac ccctgctcat  
40561 gatatgaatg actatgaagt aggacttaga cataacttag aatttataag tgtttttgat  
40621 gaaaaaggaa ttttaaacga gcattgtttg gaatttgaag gcttagaacg cttagaagct  
40681 agagataaaa ttgtagccaa actggatagt cttggcttta tagataaaat agaagaacat  
40741 aacaatcaag taggatattg ctatcgttgc aacaatgtag tcgagcctta ttttcaaaa  
40801 caatggttt taaaacaaga aattgccaaa gagagtatag aaaaagtagc cttggcgag  
40861 agtaaatttt atccaagcca ttgggttaat agctttaatg cttggatgaa agatttaagg  
40921 gcatggtgta tttcaagaca gctttgggtg ggacatcaaa ttcctgtgta ttattgtgaa  
40981 tgctcacatg aatgggcaag tcaagataca ctaaaactt gtccaaaatg cggagggcaa  
41041 aattttaaac aagatgaaga tgtactcgat acttggtttt cttcaggact ttgggcaata  
41101 agcacacttg gatggggaaa tggcacttgg ggaaaagata aaatttgggt tgaagaagat  
41161 ttgaaagaat tttatcctaa ttcctttattg ataactggtt ttgatatttt gtttttttgg  
41221 gtagctagaa tgatgtttca aagcacaat gctttaggag ctttgccttt taaagacatt  
41281 tatttacatg ctcttgtaa agatgagcaa ggtagaaaaa tgagcaagag ctttggaaat  
41341 gttatcgatc caaatgaaag cattcaagaa tacagtgcag atatcttgcg ttttacctta  
41401 gctttgcttg ctatacaagg acgcgatatc aagcttagca atgacaagct tttgcaagtt  
41461 agaaatttca caaacaat ctataatgcg acaattatc tactttttaa tgaagagcaa  
41521 tttgaagatt tagaaaagat agaacttaaa agtgcattgg ctcaatttgt ttattctaga  
41581 tttcaagatt gcgtaaaaaa tgtaaggaa aatttggaca attatcgctt taatgatgca  
41641 gcaaacacgc tttataaatt cttctgggat gatttttgtg attgggggat agaacttagc  
41701 aaagctcaa aagaatcggg aaaagaatta ggaagtattt tcaaagaagc tctaaaactc  
41761 ttaaactcct ttatgccatt tatcagcgag tatttgtatc acaagcttag caaaagtgaa  
41821 cttgaaacaa gtgcctccat aatgataagc aaataccac aatttcatgc aaaaaattcc  
41881 aatatagaag aaattttctc tttgatcata gaaagcattg ttagcatacg ccgctgctaa  
41941 agccttgtgg atttaggaaa ttcaaaaata gaaaaagcct atattaaact aaatgataaa  
42001 aaaatgcaag atgaaatcaa atcctatatg aaattcatca ccatgcttgc taaatgtgaa  
42061 aatatagaat ttacagaaaa caagctacaa aaagccattt gcgatgtgag tgagaattta  
42121 gaaatcttca ttgcacttga taatgtagat ttaagtggta ttttaacaag acttggaaat  
42181 caaaaaacaa aactagaaaa agaaagtgct aagctaaatg ctatgctatc aaatgaaaaa  
42241 tttatcgcca atgcacctaa agaagttgta gaacaaaata aggaagcttt ggcaaattta  
42301 aacactcagc ttgaaaaaat atcagctgaa ctagcaaaat taaaagggtta aaaactttga  
42361 taaaaataca aaatttataa aaatattacg gaaaagaact ggttatcaat gatgtttctt  
42421 tggagataaa aaaaggtgaa atctatgcta tcgtaggaca cagcgggtgct ggaaaatcta  
42481 ctcttttaag atgtatcaac ggacttgaag gctatcaaga aggaagttaa aaagtgttg  
42541 atgctgaaat aaaagatctg agtcaaagta atcctaaaaa acttagaatg ttaagaaaag  
42601 atataggtat gatttttcaa aattttgcct taatggaaag aaaaaatgta ttcgaaaatg  
42661 ttgcaatgcc ttttaagaaca cattatagcc aatgcaaaat ttattctaag ctttttggca  
42721 aagaatacat gagcgaaaaa gattttaaact aaaaagtaaa ttccttactt gaggtttag  
42781 ggcttgatca taaaaacaaa tcctacccta gagaacttag cggagggcaa aaacagcgcg  
42841 tggctattgc tagagctttg acttttaact ctaaaatttt acttagcgat gaagccactt  
42901 cggctcttga tcctaataca acaaaaaata ttttagaact cattgctaaa atcaatgctg  
42961 aatttgggat aaccgtagtt ttagtcacac atgaaatgga tgttgtaaaa gatgttgctc  
43021 aaaaagcttt acttttagaa catggtcaga ttataggaag tgggtcaatt gatgaactct  
43081 ttttaagcc taatgaaaaa atgaaagaat ttttaggcga aagtgatctt ttccttcaa

43141 cgggttttaa tattaagcct tattttccaa aagaagtagc acaaaatagt attattacac  
43201 atatggcaag aactcttaat attgatttta atattgtttg gggtaaaatt gaaaagctta  
43261 atggaaatgc tttgggaaat ttagtgatta atatcgatga aaaagataaa aataaagttc  
43321 tgaattatgt agagcaaagt ggggttttat gggaggtagt atcatgaatg aaatatctat  
43381 atttgatgca ttttagaaa gaatttcaca attttttact gaattttctt ggcagggtat  
43441 caaagaggtc tctctaaatt ctatcgaac ctttgacaa aactatgaaa atattttaaa  
43501 acctgcttta aatgaaacta tttatatgag tctaattggct gtattttttg gttttatttt  
43561 ggctatcatt cctggaatct tgcttgctat ttgggataaa aatggcatca agcacaataa  
43621 aatcgcttat gcggttttag attttatcac taatctttta agagcctttc cttttcttat  
43681 attgattgtc gtactcttgc ctctttctaa gattatagtg ggtactagca ttggcacaaa  
43741 tgcggctata gttcctttgg ctataggtat agcaccttat ttggcaaaga tgtagaaaag  
43801 tgctttttaa gaagtagatc atggcatcat agaagctgca aaaagctatg gtgcaagcaa  
43861 tactcaaatc atctttaaag tgatttttag cgaagcttta ccaaactca tcagcgggtat  
43921 taccctaacc ttgattttta ccataggctt ttcagcactt gcaggaactg tcgggtgggtg  
43981 cggacttggga gatgttgca ttcgttatgg ttatgaacgt ttaataaag aatcatgat  
44041 tcaaacagta attatcttgc ttatattggg gcagttgggt caaatttttag gtaatttatt  
44101 ttatacttgg gctaaaaata gcaaaacttt atacattctt gctactttaa tagtcttatt  
44161 tataattagc ataactatca atataaacia cgatgaaagt tttgtttggc aagcgattat  
44221 ttaaatcgtt cttgttctgt attctattta taaattcctt aaaaaataaa aaattaaatc  
44281 tgattttaat ttaaatataa gtttttttaa gtagaataag caaaaattht taaaaggat  
44341 taacagatga tgcctcagat gcgctagtct gactatcaaa agttctcgta tgcttcttcc  
44401 tgatagtcag agtgattaag attaaagcaa gcacaaaaat gactatataa ggaaattaaa  
44461 atgaatatca aaaatttaat cgtagcaagt tttttaggtt tggctgtaaa ttaacagcc  
44521 gcagaaacta tcagtatcgc agcaactcca gttcctcatg ttgaaatatt agagcaggca  
44581 aaacctgaat tggaaaaaca aggttataaa ctcgaaatta aagaatttac agactatgtc  
44641 ttacctaatt tagccgtaga cagcggagaa gtggatgcaa atttctttca gcacacacct  
44701 ttttggaag aatttaacia aagtaaaggc actaagctca ctaaagtagc aagtgtacat  
44761 atcgagccta tggctgttta ttctaaaaaa tataaaagtt tagatgatat taaagagggt  
44821 gttactatag ctataccaaa cgatccgacc aatgaaagca gagctttgga tattatcgca  
44881 aaaaaagggt tgggtggaatt taaagaaaaa gctcttaaaa cccacttga tatcacaaca  
44941 aacccaaaaa aaataaaatt tgtagagctt aaagctgcac aacttccaag agctttaaat  
45001 gatgttgatt ttgctgtaat taattctaatt tatgcacttt ctgcaaatct aaaccagct  
45061 caagatggcg tatttataga agataaagaa agcccttatg caaacatcct ttagtagaaaa  
45121 acaggaaatg aaaatgatcc gaaaattcaa gcttttagtaa aagctttaca aagttagaaa  
45181 gtaaacaaat ttatcatcga aaaatataaa ggttcagttc tacctgcatt ttaatccttg  
45241 tccctttttt agggacttct ctcttaaac ccaaggagt tttttatgaa attacttaaa  
45301 cttattttat tattttgttt atttaaccta agccctatat ttgcaaaaac cataaccata  
45361 ggagctacgc caaatccctt tgcaagcttg ctagaaaaag tcaaagatga ttttaaagat  
45421 aagggttatg agttgaaaat aatagaattt tctgattata tactgcctaa tagagcccta  
45481 gaagaaaaag aacttgatgc aaatttatat caacacaaac cttttttaga agaatacaat  
45541 gctcaaaaag gcacaaaatt aaccgcgata acacctgttg tcatcgacc agtaggaatt  
45601 tatagcaaaa caatcaaaga tttgaaaaat cttaaaaaag gtgctagggt tgccatacct  
45661 aatgacgcta cgaatgaaag tagagcttta gaacttttag aaaaagctgg cttaatcgaa  
45721 ctcaatcaaa acacactcaa aacccatta gatataaaga aaaatcctaa gaatcttaaa  
45781 ttcatagaat taaaagccgc acaacttcca agagcttttag atgatgttga tattgctgtg  
45841 attaatctta attttgccct tggagctgga cttaatccga ttaaagatac gatctttagg  
45901 gaagataaaa acagccctta tgtaaaattat gttgtagtcc gctttgaaaga taaagatagt  
45961 gaaaaaacta aatcataga tgaaatttta agaagtgata aatttagaaa tatcatcaat  
46021 gagcactaca aagatgtgct aatccctgca ttttaaggag tttttatgaa atttaaaaaa  
46081 gtattactaa gtgttttttg tataacaagt tttctctttg gagctgaaaa gaatatcatt  
46141 ataggagcaa cgcctactcc ttatgctgaa atcttaaat ttgcaaaacc tattttttaa  
46201 gaaagagggt ggaatcttga agtaaaagaa tttagtattt ataataacc caatatctca  
46261 cttaatgaaa aagatttaga tgcaatttta tatcagcaca atcctttttt agaggatttt  
46321 aacgctcaca aagggacaaa attaagttct ttgggttcta ttgttttggt tcctatggct

46381 atttattcta atgatattaa agatattaaa gatattccaa atggtgccaa aatcgccatt  
46441 ccaaagatg ctaccaatga aagcagagct ttggatttac ttgctaaagc tggtttgata  
46501 gaatttaaaa cctcaagcac tcttaaaact ccgattgata tcagtaaaaa tcctaaaaat  
46561 cttaaattta tagaactaaa agccgcacaa cttccaagag ctttaaataga tgtagattta  
46621 gcagtcatta cgacaaatta tgctcttggt gcaggactta atcctctaaa agatggaatt  
46681 tttattgaag acaaagacag cttatatgct attggtctag cagtaagaca aggcgatgaa  
46741 aaaagtgaaa aaagtctaata tcttaaagaa attctaacca gtgataaaat aaaaaatttc  
46801 atcaacgagc aatacaaagg ctctgttata cctacttttt aatccaagca aagcctttaa  
46861 aggctttgta aatttgattt gggtaaaata taaaagatta atactgtatt aggctagcaa  
46921 tgagaattat atcttttatt ttttttgttt ttattggttt aagtcattggt gcaaatttag  
46981 aagagattaa aactgcactt gctaaagaat ttaaaaacaa ttttccaagt ttaatcatca  
47041 aaaatatcga tttaaaaatc actactttac ctaaagattt tgaacaatat caatttataa  
47101 gaatagccaa tgctcgtttt aaccaagctc aaggatttat aagagctgaa tttaaaacc  
47161 cgaaaaatat acagaaaaat gtattttttc gttattttat gcaagcaagc ttagaagtat  
47221 taagaagcga acgctccata caaagaggag ataaacttgg cgcttttgac tataaaagcg  
47281 tactcatgga ctttgataaa gttccatcta atgctctaac ccctgaagat actcacaacc  
47341 tcatagcaaa aagtaatatc agtaaaaata ccatttttaa agaaaatatg tttaaaacca  
47401 tggctcttat tcgccgaat gatcctataa taggtatttt aagcgatgga aatgtcgatg  
47461 ttttaataga actcacagcc ctacacagtg ccgatatggg agaaagaatt cgagcaaaaa  
47521 acaaagaagg taaagtcatg caaggtatag tcacaggaaa aataggatg attatacaat  
47581 gaaaatttta ttaggaattt caggatctag cagtacgcat ttaggactta aactttttaa  
47641 aaatttgag aataaatgag agctttattg tattatcact gaaggtgcaa aaataagttt  
47701 tgaagctgaa aataagaaaa acttagaaaa aatttgtcaa gaagaatttc aaaatatctg  
47761 ctttttaagc gataacaact taagtgaag cgttgcaagc ggatcttttg gtatagaaaa  
47821 aaccatcatt gcaccctgct ctatctcaag ccttgctaaa attcacgcag gattagccga  
47881 cacgctttta atgcgagctg ctgctgtggc ctaaaaagaa agaaaaagct tgattttggg  
47941 agtaagagaa atgccttttt caaccttaa tttagaacat atgcacaagc ttagccaact  
48001 aggcttatc atcgcacctc ctattatagc aagctattct catgctagcg atttagagca  
48061 aatggaaaat tttatcatag gaaaatggct agatctttta ggaatttctc ataatttata  
48121 tgagaaatgg cagaattttt agcttaaatt tgttatattt ttaaaaattt ttggagtaaa  
48181 aatgacttgt ttatacccag ggacttttga tcctatcaca aatggacatt tagatgtagt  
48241 taaaagagcg cttaagatct ttgataaagt gatcgtagct atagcaataa gcgagcataa  
48301 aaagccttgt tttagtttag agcaaagaaa agagcttgca aagcttgcca cctcacattt  
48361 aaacaatgta gaaattatca cttttgataa tctccttgta gaattagcca aagaacttaa  
48421 agtaataact atagtaaggg gacttagggc agtaagtgat tttgaatacg aattacaaat  
48481 tggctatgcc aatcatgccc tttgggaaga aattgaaact atttatctaa tgccaaattt  
48541 aaaaaatgca ttcactcaaa gctccatagt tagatctatt gcttccatg gaggagatgt  
48601 cagcgcctta gtccctaaag aaattttacc ttttttaaag gatttacctt gtatgtagtt  
48661 tttgaaggag tagattgcgt tggtaaaagt acgcaaattt cactttttaa agaattgttt  
48721 aaagaagcta tttttaccgc agagcctgga ggaaccaagc taggtgctca ttttaagagaa  
48781 cttttacttc acaaacccta tcaactcgat aaaaaaacg agcttttgct ttttttagct  
48841 gatcgtgagc aacactatga tgaagtttta aaagcaaatc aagataaact catcattagc  
48901 gatagaagtt ttatttcagg catggcttat gcaaaaagatt ttgaaaatga agagcttttt  
48961 agacttaatg cttttgcttt agaaaatttt ttcccgaaa aagttatttt tttaaaaggc  
49021 gatgaaaatt taatcaaaga gcgtcttaat caaaaagaac aagacgctat agaaaaacgc  
49081 ggaattgatt atttcttaag tgtccaagat aaacttgaaa atactcttca ttttttaaaa  
49141 gaaaaaataa atcttcaagt ttttaacccta aatgcaaatg atacaaaaga aaatttacac  
49201 caaaaaataa aggatttttt acaatgatta atgctctaaa aggtatgaaa gatttaagcg  
49261 ataaggatgc gctttattat gaaaaatta tcaaaaactg tgaagaagtt gcaaaaaact  
49321 acgggtttta ttttatcaat accccgcatt tagagcaaag catacttttc aaaagaagcg  
49381 taggagaaag ttctgacatc gttggcaaag aaatgtatga atttgtagat aaagggggca  
49441 atgaagtctg catgcgccct gaaggcacag caggagtcgt gcgtgcttat atagaaaaaa  
49501 aattagataa aaatatcagc gtaaagcgtt ggttttatca tggttctatg tttcgttatg  
49561 aaagacctca aaagggtcgc ttaagagaat tcatcaatt tggagttgaa agctttggca

49621 tacctagcgt ttatgaagac gcgagcatta ttttaatgct agtagaaatt ttctcacgcc  
49681 ttgggtattga ttttaaactt cagcttaatt ctttgggttg ctcaaatgc ttgccaaat  
49741 accgcgatga gcttattgaa ttcttagatt ctaaagaagg tttttgcgaa gattgtttgc  
49801 gtagaaaaaa tttaaatcct attcgtgttt tagattgtaa aaacgaacat tgtcaaaatt  
49861 tacttgaaaa tgctccactt ttaatcaata atttatgcac ctcttgccaa aaagactttg  
49921 aaacgctaca acaaatttta aaggataatg gagttaaatt cgagctagat tcaaaacttg  
49981 tgagagggttt ggattattat tctaaaacag cttttgaatt tataagcgat gaaataggtg  
50041 caaaagctgc tatcgcaggt ggaggacgct acgatagact tatagagtat ttaggtggaa  
50101 aaagtggcta tggcataggt tttgccatgg gtatagaaag aattatagct atcttagaac  
50161 aaaaagaaga gttagaaaaa agagagggaa tttatctttg tgctatggat gaaatttata  
50221 tcccaaaact tttacaaatt gccactaac ttagaaaaaa acataaagtg atcttaagct  
50281 atgaagctag aaaacttgct aagcacttag aaagtggaga taagataaat tcaaaacatt  
50341 ttctttgtat gggagaaaaa gaagcaaaaa acgaaagtgt gttttataaa aatttagaaa  
50401 ataaagatga aaaaatgatt aaaatttcag atttggagaa tgctttatga tgaattatgg  
50461 aattgatatc tggggaaatg aaaattttat catcaaaaat ggtaaagtgt gtatcaatca  
50521 cgaaaaaaaaa cctgccatta tcgatatagt aaaagaacta agagatgatg gatacaaagg  
50581 gcctttactc ttaagatttc ctcatctaata ccaaaagcaa attgaaagta tttatggaag  
50641 ttttaataaa gctagaaagg aatttgacta taaaggaaaa tttaatgctg tttatccttt  
50701 aaaagtcaat caatatcctg gttttgtaaa aaatctcgtt cgcttaggta aagattataa  
50761 ttacggctct gaagcaggtt ctaaggctga acttttgctt gctatggctt acaataacga  
50821 agatgcgccc attaccgtaa atggatttaa agatagagag cttataaaca taggatttat  
50881 agctgctgaa atgggacaca atatcacctt aaccatagaa ggactaaatg agcttgaagc  
50941 cattgttgat atagctaaag aacgctttaa acctaagcct aatataggct tgcgtgtgcg  
51001 tttgcactct gctggcgtag gaatttgggc aaaaagcggg gggattaatt ctaaatttgg  
51061 acttacctct actgaactta tagaagcggg taatttactc aaagaaaaca agcttttaga  
51121 gcaatttacc atgatacatt ttcactttgg ttcacaaatc actgaaattc atcctcttaa  
51181 aaaagcttta aatgaagcag gcaacatcta taccgaactt agaaaaatgg gggctaaaaa  
51241 tttaaaagct atcaatctag gcggcggttt agcgggtggaa tactcgcaat ttaaaaacga  
51301 aaaaagccga aattatactt taagagaata cgccaacgat gtggtattta tcttaaaaaa  
51361 tatagccgaa caaaaaaaag atcttgagcc tgatattttt atagaaagtg ggcgttttgt  
51421 cgcggcaaat cacgccgttt tagtcgctcc tgttttagag cttttctctc aagaatacac  
51481 agaaagtaag cttatactaa aaaaacaaaa tccaaaactc atcgatgaac tttacgatct  
51541 ttataaaagc ataaaacctt ccaatgcttt agagtatttg cacgatagta tcgatcattt  
51601 agaaagcatc ttaacacttt ttgatttggg ttatgtggat ttgcaagatc gttctaattgc  
51661 tgaaatttta actcatctaa tcacaaaaaa agctatttta cttttaggcg ataaacaaaa  
51721 tcctgcggat ttgctcgcca tacaagatga agtacaagaa aggtatttgg taaatttttc  
51781 actctttcaa agcataacctg atttttgggg cttggagcaa aatttcccca tcatgccact  
51841 tgatagactt gatgaagagc caacaagaag tgcaagtata tgggatataa cctgcgatag  
51901 cgatggtgaa atttcgtatt ctaaaaacaa tcctttattt ttgcatgatg tagatgtaga  
51961 aaaagaaaat tattttctag gttttttcct tgtaggggct taccaagaag tgcttggaa  
52021 gaaacacaat ctttttactc atcctactga agcaacgata agcgtaaatg aaaaaggtta  
52081 tgaaatcgaa gggattatag aagcccaatc catacttgat gcttttagagg atctagacta  
52141 tgacatacat acgattatgg atatactcaa tgaacgcatt agcaattcta aacttgtcaa  
52201 cgaaaaacag aaaaaacaca ttttaggcga actttatctt ttcttaaacg ataattggcta  
52261 tctaaaaagt ataggagtgt aaatgggatt tttcagcatc ataaaagaag atttttcca  
52321 accaaaagca caagatccgg cgtataattc ttgcgtagaa ctttttttca attaccggg  
52381 tgtatgggcg gtagtaaatt accgctttgc acattttttt tatacaaaaa atttcaagcg  
52441 caccgctagg ataactcagcg gaatttcgca gtttctaaca ggtgtagatc tacatccagg  
52501 tgcaacttta ggcaggcgta tttttataga tcatgctaata ggagtgggtga taggacaac  
52561 tgcaactcata gaagatgatg ttttgatcta tcaaggtgta accttaggtg gcaccagtct  
52621 tgaaaaaggt atcaaacgcc atcctactat aaaaaagga gtgattatag gctcaggtgc  
52681 aaaggtgctt ggcaatatca ccataggaga aaatgccaaa ataggctcta atgctgttgt  
52741 tgttaaagat gtaggagcaa atttaactgc agtaggaatt cctgcttata tagtggaaaga  
52801 acgacgcaaa aataaagaaa atacaagggc tgttgatgca aactgcgaag ataaactcga



52861 aaaattagag agaaaaatcg cagagcttga aaaagcttta tctaataataa aataaaatac  
52921 ataaaaaatt ttatatattt ttatgtattt tagcttttaa caaattttca cattaatcta  
52981 tttttgcaat attaattttt aattaaattc gctgcatagg tgtgtttttt tgctaaaatt  
53041 agacaaaaaa ttcaaaagga caatagatgt taacccaaag atcacaagtt ttagaagaat  
53101 ccatcacctt agctatcact gcattagcca acgatttaaa agccaagggt gaagatgtga  
53161 tcagcttctc cgcaggcgag cctgattttg atactccgca aactatcaaa aatgcagcca  
53221 ttgctgcat agaaaagggt tgtggtaa atactgctgt tgcaggaatt cctgaagttt  
53281 taaaggctat tcaaaaataaa cttaaaaaag ataagtgtt aagctatgaa acaagtgtgaa  
53341 ttatcacaaa ttaggggca aacattctc tttttgaat tatagaatgt ctagttgaag  
53401 aaggcgatga agtcatcct cctagtcctt attgggtgag ttatcctgaa atgggtcaaat  
53461 ttgctgggtg aaaacctgta tttatcgagg gtttagaaga aaatggcttt aaaatcaacg  
53521 cagagcaact caaaaaagct atcactccta aaactaaat tttaatgctt aattctcctt  
53581 caaatcccgt aggttctatc tatagcaaag aagagctttt aagtattgct aaggtttttag  
53641 aaggcacaaa gattatcgta ttaagtgtg aaatgtatga aaaacttcgc tatgatggct  
53701 ttgaatttgt agcttttgca agtgtaagt aagatgcctt aaatcgact gtaactatca  
53761 atgggcttag taaatgcggt gctatgcctg gatggcgttt tggctatatg gcaagtaaaa  
53821 ataaagcctt gatttcagct gttaaaagac ttcaaggcca aagcacttca aatatttgct  
53881 ccatcactca acatgctgct ataccgctt taaatggaga atgtgatgag gatatagaaa  
53941 aaatgctgca agcttttgaa aagcgtcgcg acttagctct aatatgctt catcaaatc  
54001 caaatattag tgtttataaa cccgaaggag ctttttatct ttttgtaa actcaaaaa  
54061 ttgaaaaaga ttctatgaaa ttttgccaaa aattactaga agaagaaaaa gttgccgtgg  
54121 ttccaggtat tggttttggg atggatggat acttttagact ttcttatgct acaagtgatg  
54181 aactgattaa aaaaggtata gaaagaatag caaattttgt taaaaattat aaataattct  
54241 aggtttttaa ctagaattt ttaactttt aggcaatcaa atcaaatttt accaacgaat  
54301 ttaaacccta aatcaagggt tttttaagta ctgcatttac tctttgact ttatctagtt  
54361 tatttaact aagccttatc acagaatcct ctaatccacc caaagaatgt ggcacatttg  
54421 cttctaagct tatcatatct aaagcattaa actcaaatct ttcgttttct acctcaaacc  
54481 aaattttacc acttaaaact tgcacgcgga tagcaaaggg tgctttatgc tctttcatca  
54541 cgctatcttt agcaagtaaa atttgaattt ctttgctgtg ctcatcatcg attaaaacat  
54601 tgattttaac ttcttttgga cttaaattcag ctttgctcca ttgaacgatc ttcatacaat  
54661 ctctttttt acttttataa aattgtagca aaaaccaata tgcagactat aaacttgtgt  
54721 taattttatc cttctttcca ccaaaaatct tgcttaaatt cacttctac ctcataagct  
54781 tcgcccattt ttggtgtaat caaaggtaaa tttaaattct cataaagaaa ttcaccacc  
54841 ccattccatg catgagttcc tgctaaaaat ctgcccctaat gtataggcat taaagctttt  
54901 gcgttcaaat cttttgcttc ttttaaaatt tgatcaggaa aagaatgtga aaaaggccaa  
54961 gcggtattaa attgaccgct ttcaaggcaa accaaatcaa aaccaccaa ataagcccg  
55021 atttttttaa aatgtgtaaa atatcctcca tcgccactaa aaaacaccct tttatctgca  
55081 cttaaaaact ccatcacaaa ggaagcccaa agagttttat tgagcccatc gccctactt  
55141 gagctatgct gtgcaggcgt tgcaataatc cttaaatcat caaattccac cccactccac  
55201 caatcaagct ctatgatttt tttctcactc actccataac tttttagata atttcccacc  
55261 tttaaagggtg tgatgaaaaa ttttagcctt ttttttaaag ctttcacgct tttttcatct  
55321 aaatgatcaa aatgcgaatg agtgataatc acagcaaaaa tttcatcaaa atcatttgca  
55381 ttataaacag gtgcattttt aaaagcttta ttgataaaag aaaaaggcga agcatgagtg  
55441 ttaaaaatag gatcgattaa aattttatag tttttatagc tcacaaaaag cgatgaatgc  
55501 ccaagccaag tgatgtgagg ggtatgaaaa tgattttaa atcggtttaa aaaaggaagt  
55561 ttaaaagtcg ctttagcatt tttaggataa aggtagtaat atctcaaac ttcctaaaa  
55621 gacgctttaa aagcattgtg cgtttgggag tttcattaa gaaaaattc atatttttta  
55681 ccctgtactt ttttagcctt tgggtgttct ttacttgaaa gatcaaagggt tttaaatgat  
55741 aaattcaatt ttttcctttt tatgtttatt aagattatat ccaagaaatt tttagattaa  
55801 tttattttta cacaactttt tagttcgctt gtgtttaa atgtccaaatca aatattggat  
55861 aaaatgatgc aaaaagaaaa tttatacaaa ctaggcaaaa taattaaaga aattgatttt  
55921 atatttgaac aaactaatgg taagcttatg caagctttaa aaaatgaaat caaacaaaa  
55981 gctattttca tgtcgataat caacatcaa gaaacgataa aaaatatcca agatagcgca  
56041 gatactgaag ttatgataat ttttcgtgaa gaagatatga aaagactctc aaaaagtaga

56101 aatattgcag cacatgatag tcaggctatg aatttaaata tcgtaacaaa ccttattcgc  
56161 tacgatctac caagactcaa acaaagcatt gttaatttta aaaataatcc aagcgattta  
56221 cattttattc caaaagaaga aaatgtcaaa aaaagaacac taaaaccact agaagcatta  
56281 attatTTTTT tatttgcattg cattttatct tgcattgttt ttattgtctt ttttttactt  
56341 aacaaacccc ctaaaaacat aaaacaagaa aattcttcgt atagctttca taaaaattat  
56401 ttttatccgt tagaaccttt tattcttaat ctgcagcaag ctggtagaca aaaatatata  
56461 cgctgcacca ttgaattaga attaataaaa gaaattgctt tagaagattt tacaanaatt  
56521 tcaccggtta ttagagatac tattattcaa accattctag caaaagaaat acaagaaatt  
56581 gaattctcta atttcaaact agaacttcaa agagaattgg ttaaaaaaat taatgaaaaa  
56641 ttaggcaata agctgattaa agaattatat ttagagatt ttatcatctc ttgaaaattt  
56701 ttataaaatt ttcaagcctt ttaaaaaggc ttgattaaag atcttagaga gttttattcg  
56761 acttcagcgt cgattacatc atcgtctttt ttctttttat catttgctgc atttggctca  
56821 tcttttttat acatattttc agccaattta tgagaaacct cgcttaaagc tttcatttta  
56881 gcttcgattt cttctttgct tgcattttga tttttcaaag tctcacgcaa atcatcaaga  
56941 gctttttgga tattttcttt atcactatca gctacttttt ctccaagctc atttagagat  
57001 ttttccactt ggtgtgcaa gctatctgct gcatttcttg catctacagc ttctttgcgt  
57061 tttttatctt cttctttgtg aagttcggca tcttttacca tattgttaat ctcttcttca  
57121 ctaagtccgc ttgaacctgt gattttgatc tcttgtgctt tacctgttgc tttatctttt  
57181 gcagaaacag tcaaaatacc attcgcacg atatcaaaag ttacttcgat ttgtggcata  
57241 ccgctgggtg ctgggtggaat tccttcaagg ttgaaatttc ctaaagattt attgtcgcgg  
57301 ctgaattctc tctcaccttg taaaacattg atggtaacag cactttgatt gtcttctgca  
57361 gttgagaaaa cttgctcttt tttggttggt atagttgtac ctttttcgat gattttagtc  
57421 atcacaccgc ctaaagtttc gatacctaaa gaaagtggag ttacatcaag taagagtaca  
57481 tcttttacat caccttttat aactgcacct tgaatcgctg caccaatagc cacaacttca  
57541 tcaggattta cagatttggt aagttctttt ccaaaagctt ttttaacctc ttcttgcact  
57601 aaaggaacac gagtagaacc ccctaccata acgatttctt taatttcggt tttatcaagc  
57661 cctgcatctt ttaccacttc attgatctta gtgatagttt cagccactaa agaatcaatc  
57721 atgccttca atttagctct agtaagtttt ttaaccaagt gttttgggccc actcgcataca  
57781 gctgtgataa atggtaaatt aatctctggt tcattagctg aacttagctc ttttttagca  
57841 ttttctgcag cttcttttaa gcgttgtaaa gccataacat catttttaag atctatacct  
57901 gtttcatctt taaattcact tgctagaaaa tcgataagct tgttatcaaa atcatcacca  
57961 cctaagaaag cattaccacc tgttgctaaa acttctacta cattatcccc tgtttcaagc  
58021 acggtaacat caaaggttc cccacctaga tcgtaaaacta cgattttttc actatctttt  
58081 ttatcaagtc cataagctaa agctgctgaa gtaggctcat tgataattct tagtacatta  
58141 agtcctgcga tagttcctgc ttcttttggt gcttttcttt gtgcatcggt gaaataagca  
58201 ggacagtaa tcaccgcatc agtaacactt tcaccaaga aagcttctgc atcttctttt  
58261 aatttcatca aaacttttgc tgaatttct tgtggagtgt aaattttacc tgcgatttct  
58321 atcgcgcacg caccatttct ttcagtgatg tgataaggaa gtctattttt agcttcttta  
58381 gccgcatctt cattgatcat caaacccatg attcttttga tagaataaat agttttttca  
58441 gggtttgta ccgcttggcg ttttgcgcta tcgcctacta aaacttcacc tttatctgta  
58501 aaagcaacta ctgaaggagt tgtgtttttt ctttctttgt ttgggattac tttgctctcg  
58561 ccgcttcat atacagcaac acaagaattg gttgttccta aatctatacc tataacttta  
58621 ctcatTTTTT atcTTTTT taaaatttat tttgctacac taactttggt tgggaggatc  
58681 acgcatcgg ctattttata acctttttga agcacttgaa ccacttcacc actttgatga  
58741 ttttcaactat ctacatgaaa catcgttca tgtaaattag gatcaaactc ttttcatct  
58801 ttgataagag ccactccatg tttttcaagt tttttaagaa ataaatctaa agtgttttgt  
58861 actccttctt tgatttttaa gctaattctca tcttggcatt cgacattaac ggcagcttct  
58921 aaagcatcta aaacatcaag caaatcttta gcaaagcttt catttgcata agccatagca  
58981 cttagctttt ctttttccat tctttttttg atattttcaa attcagcgtt tgcacgcata  
59041 ttttatctt ttaattcatc taattctttt tgtaattcat ttgtttcact ttcttcgcta  
59101 tcttgcaaat catcctgcaa attttcagaa ttttgcgcat tttcgttttc aaattcttgc  
59161 ttttgttcgc tcatgccgcc tcctttatgt attgtaatat tttttataa tctgtataaa  
59221 cactaccgc taggataata tttacatcct cgcccaaaaa ctgcgcatcc accttaatcc  
59281 ccataaaacc ctctttaaac aagggttcaa attcaagact ttccttaaaa tgacgatgga

59341 tttgacaatc caagagctta acaaattcat cgttttgata aatttggtaa gctctttctt  
59401 cattacttct ataacaaatc agattttgtc ttagacttgc tatcttttct gcaagctcta  
59461 caaatggac tttaaaggct attttttcta tactagaaag atcaagtcct ataagacttt  
59521 gtagaaaatt ccacgcttct ttttcgtatt ttaaaaccag ttcttcatct ttaaaatcaa  
59581 gcactataaa cttagcgtta agatctaaca cttctttaag caccaaactt ctaccgcat  
59641 aaacaagaca ataaatttca aattccttgc ttagctcttt taaaaagctt tcatttttga  
59701 tatgaatggt tttatcttgc tctttttccc aaaaattttg ccaataattt tgcacgtta  
59761 aaatagtagg aattctgcca ccgcttatgt gaagctgagt gatcaaacc tcacgcctaa  
59821 gtcttttaag ataaacgcgt atagttgaag cgggtatgca aagatttgaa tttaatcatt  
59881 tagaaccaat aggtgcatta tccaaaagat aagtttggat aatagactct aaaatcaaat  
59941 tctttttatc tcgacttttc atcatatttt ctttcaaac tagcactcta ttttttgatt  
60001 gctagatata ttatacaaca ttgagtggtta ttttgtcaag tataaatata aaaaaatata  
60061 ctttaatttta tttagtctat atgactaaag ttttattagt tactttttta taaggataag  
60121 atatatttca tgattaaaaa aacaaggtga taaagatgaa aacaaagaat gaattttaaa  
60181 tgggcttgat gatggatttt ttaagtataa ggcgttaaaa acaaaaaaac caaagaagcc  
60241 tttgcaagct ctttggctct tctatcaaag cttaaaagct accattgata gaaatataca  
60301 ttcttcttcc ttcttctatg cggttataag tatttaccba agtgttatca ctcccacttg  
60361 tataagattc ccagccattt gtaaagcttt tgtcaaaaag attataaata gccgcattga  
60421 tactccattg tttattgata tcataacgca cacccataga agctaaaaag atatccttgt  
60481 aatattctct attgatatta gtatcaccca tatagcgatc tatttgccac tgcctttta  
60541 tccaaggagt gaatttatta tagaagctgt attcggtttt taacatgata ttgtgtttta  
60601 aactatcttg ttcaggttta cctatcacac ttctatcttg cgcttcttta acttcagtat  
60661 caagataagt ataagcaaaa tttacattta aattatcaag agggcttatt cctgctccaa  
60721 gttctacacc tttgtattca accttgccat gattgattgc tctagaacat ctatcagcat  
60781 cacaagcgc aattcctgga atcatagtgc cattgttata actttgactt gaaattttat  
60841 ctttaaaatt cgttaaaaaa cctgttgctg aaacataaaa taaatcatta ttataaatag  
60901 ctgctatttc atagttttaa gatgtctctt cttttaaatc aggatttcca tatgtaggaa  
60961 atctgccttg gccactataa ttgtaagttc catttatcaa acgatttgca taaggggttc  
61021 taaagcctgt agatacaccc ctttgaaag taagctcatt ggtaggatta taaaccacat  
61081 aagctcttgg cgaacattg tttccaaaaa tttcatgatg attatatctt gctccaaaag  
61141 taagtcttaa atcatctttt atactatact catcctctgc aaaaattgcc aataaatact  
61201 gatcaaaatt agtaggacta gctattttat cttgcatttt ttcgagtcta tactcaccac  
61261 ctgactcaa aatatgactt tgtcctaaag gaatgacaga ttttgtatct aagataatat  
61321 cttctgcgac tatatctcta ttttctcca aaaacggctg tgtagcttgc cctacgactt  
61381 cgcgccatc attgctcact ctattatatt gcaaacgaga agtgatagaa aagttttcat  
61441 aaacaccttc atggcttaaa taagtcacaa atttatcaac ttccataata tctgcataac  
61501 caccggttaa gctatcttgt gcactacctg gtcttgtgat ggttcctaatt tgacctgtt  
61561 tgttgcgta atgatttctt gaaaaatcta tatcaaatat aaaagtattg taatcattag  
61621 ccaaataact aactcttgtt cctatgttaa aattatttgc cttttagtagga ctttgagctt  
61681 gatccccttg aactctttgc ccacttccat ttgtaaattc aacattagat tgctgtctat  
61741 aaaattctct aaaacgaagt gtttagaccta atttatcatt cattaaagga ccactagaat  
61801 aaatacttgt ccataagta ttgccccaat ctttattttc atttaaaaga gcatccaac  
61861 ttacagaagt ttcccattta tcactcactt ttttagtaat gatatttacc accccgccta  
61921 aagcttcgga gccatataaa gtactcatag gaccttttat aacttctatt ctttctatgc  
61981 tagaaattgg cggttaagaaa gaatttgaaa tttcattaaa accattagga ccaacctctc  
62041 caccaatacc ctggcggcgt ccatcaatca aaaccaaagt atatccagta ataccctca  
62101 tagtaatat ataagaacct gtttttccct tgctagcata taaatcaaca cccgggatat  
62161 ctgcaatagc ttctgcgaca tctctataag gcttactttg taattctttt ttgctgataa  
62221 cattgatagt agcaggagct tctttaatat cttgagcaaa ccctgaagca ctaacgatcg  
62281 aactgtctag ctctacattt tgtgatatag cattggaagc taagaggcca atagcacaaa  
62341 ctgatagaca taatttcttc atttttctcc ttttgtaaaa tattgattta aaaatcaaaa  
62401 tattatgata ataattatta atttaagata aattttgtat caattgtgat aattagtatt  
62461 aattaaaaat ttattttttc ttgctataat tcttgaaaaa taagtttttt aaagaaataa  
62521 atagaaaaat aaaatactta tactgaatgt atttttgagt gttttattgc tatttttctc



```

gene      /mol_type="genomic DNA"
          /strain="strain"
          complement(1272..3800)
          /locus_tag="DMACINML_01524"
CDS      complement(1272..3800)
          /locus_tag="DMACINML_01524"
          /inference="ab initio prediction:Prodigal:2.6"
          /inference="similar to AA sequence:RefSeq:CAL34418.1"
          /codon_start=1
          /transl_table=11
          /product="molybdopterin containing oxidoreductase"
          /protein_id="Prokka:DMACINML_01524"
          /translation="MLDRRKFLKIGAAALSTLPLIPTLGAGKSVEATKVSLGLVKNGEV
ITAAHWGILKLTIKDGKIVKSEPWEKITSMDNPLQHYTADMVYKSRIKYPYVRKSYLQ
NPDNPKPELRGKDEFVRVSYDEAVKLIAKELKKTREAKGTSIAIFGGSYGWKSSGNMQN
ARILLHRFLNVTGGFVGATGDYSTGASQVIMPYVVGSIIEVYEQQTSWENILEHSKYVV
IWGADPISTLRIAWTASEQRGLAYFEKLKEKKIKVICIDPVRTDTAKFLNAKWVAPRP
NTDVALMMGMASHLIAKNKVNIEFLNYTIGFDKFKDYLDGKEDGIKKDVKWASKICG
IDEKTIKNLAEIFYDNPTMIMSGWGMQRAHYGEQPHWMLVTLASMIGQIGTKGGGFGL
SYHYSNGGVPTCKGGVIGGINAGSLGIWKNKGFQGLAKSNQASGGAEWLQNAASYSFP
VARIADALLNPGKTI DHNGSKITYPIDIFIYVWGGNPLVHHQDTNTNVKAWRKPRTVV
VNEIYWTPTAKMADIVMPTTSSYERDDITMSGDYSNMHIIPMKQAVEPVGESKDDYII
FADICKVYGQNVYNAYTEKGGKAKDFIKEYYDSALKQTQSFGEAFATPMPNFEFWAK
NEPITFEATAESLEWTRFSEFIEDPILNALGTESGLIEIYSQTIKKNYNDCKAHPWTW
FEPIEWLGNATKEAPFHLLTNHPKDRLHSQLCHTSLRETYAIKDREPILINTKDAKKL
GIKNGDVVRVFNKRGEVLAGVIVSDDIMQGVVRLCEGAWYDPDENGLCKCGNANVLTII
DIPSSKLANGNIAHTGLVNIIEKFTGKLP TLSAFSAPKGAYLTLS"
gene      complement(3813..4385)
          /locus_tag="DMACINML_01525"
CDS      complement(3813..4385)
          /locus_tag="DMACINML_01525"
          /inference="ab initio prediction:Prodigal:2.6"
          /inference="similar to AA sequence:RefSeq:CAL34419.1"
          /codon_start=1
          /transl_table=11
          /product="putative cytochrome C-type heme-binding
periplasmic protein"
          /protein_id="Prokka:DMACINML_01525"
          /translation="MKIFISFFVLATCLWAKEIAYTDEVVSLYLHKDDTKVTGRLLPT
NAFEILKSDGDRVLIKVDGYVNPKAPSVIYFNDSQRIIVA AFSKNTKLNFSQISAGKN
GKWDKVSLEIWADKKDFAKDNKEMLNRAKNLFAENCGICHALHPEKEFTANAWPAVFR
SMADRTGIDKKDRWLVIQYLQKNAKDFKAK"
gene      4738..5550
          /locus_tag="DMACINML_01526"
CDS      4738..5550
          /locus_tag="DMACINML_01526"
          /inference="ab initio prediction:Prodigal:2.6"
          /inference="similar to AA sequence:RefSeq:ADN90505.1"
          /codon_start=1
          /transl_table=11
          /product="CAAX amino terminal protease family protein"
          /protein_id="Prokka:DMACINML_01526"
          /translation="MITIFILLALALTLFSFKTKLSFMVLAISGILAYYYNIIIEISF
IAFMGVFFLLSLYYKNNKNIFLELLIVAFCLLLFLHFIPGVNNVKILDKVVHASEHSSA

```

FTLYFSFDKPLGVFLLFLLMPSLFENLNRIKPKLFQAVLLFASPFLLLSIPWYLGVIK  
MEIGFPSWIVYFLFSNLFLVALVEEAFFRGYLQRLQGLIGGVGALLVASLAFGVAHY  
KAGILMIIFASLAGLIYGMAWRYSKSLWLSVFFHYGLNLTHLFFFTYPSYVK"

gene complement(5554..6891)  
/gene="purF"  
/locus\_tag="DMACINML\_01527"

CDS complement(5554..6891)  
/gene="purF"  
/locus\_tag="DMACINML\_01527"  
/EC\_number="2.4.2.14"  
/inference="ab initio prediction:Prodigal:2.6"  
/inference="similar to AA sequence:RefSeq:CAL34365.1"  
/codon\_start=1  
/transl\_table=11  
/product="amidophosphoribosyltransferase"  
/protein\_id="Prokka:DMACINML\_01527"  
/translation="MCAVGVINSKNASTYAYYALFAMQHRGQEASGISVSNKTIKT  
IKAKGEVNQIFNPDNLKTLGEIEAIGHNRYSTAGNSSLNDAQPVAATSVLGDIALAHN  
GNLVNKEKVRSLIEDGAIFQTNMDTENVVHLIARSKKESLKDRFIESLQECIGAYCF  
VLASKDKLYVVRDPYGVRLSLGRLKDDGGYIVASETCAFDLIEAEFIRDVKGEMIIIF  
TQGNDFESIELFKQEPRICAFEYIYFARPDSIIIEGKSVYEIRKKMGEALAKKFTHTSA  
DFVVPVPDSGVSAIIGFSQYLKIPLMAIVRNHYVGRFTFIEPTQELRNLKVKLKLNPM  
HKVLKDKEIVIDDSLVRGTTSKKIISLLRAAGASKIHLAIACPEIKFPDITYGIDTPT  
FEELISANKNLEEVREYVEADSLSFLSIEELTQSIGDERKYSLSIFDGDYFIK"

gene complement(6893..7621)  
/gene="dapB"  
/locus\_tag="DMACINML\_01528"

CDS complement(6893..7621)  
/gene="dapB"  
/locus\_tag="DMACINML\_01528"  
/EC\_number="1.17.1.8"  
/inference="ab initio prediction:Prodigal:2.6"  
/inference="similar to AA sequence:RefSeq:ABS44158.1"  
/codon\_start=1  
/transl\_table=11  
/product="dihydrodipicolinate reductase"  
/protein\_id="Prokka:DMACINML\_01528"  
/translation="MINIGIYGAKGRMGKQIEECLKSENKAKAAALFDKGDNLEEFFE  
KSDVIIDFSSPNGTHELLNYARTMPKPLVIGTTGLDEKTLHLMQNASEVMPVFYATNM  
SLGVAVLNHLASKASQMLRNFIDIEILEMHRHKKDAPSGTAMTLAQGVAKARNLDLEK  
VRISGRDGIIGERSKDEIAVMSLRGGDIVGRHTVGFYEEGEFLELNHTATSRAFAG  
AIKIAIWLNAQEPKMYSINDFLGI"

gene complement(7689..8870)  
/locus\_tag="DMACINML\_01529"

CDS complement(7689..8870)  
/locus\_tag="DMACINML\_01529"  
/inference="ab initio prediction:Prodigal:2.6"  
/inference="similar to AA sequence:RefSeq:CAL34367.1"  
/codon\_start=1  
/transl\_table=11  
/product="helicase-like protein"  
/protein\_id="Prokka:DMACINML\_01529"  
/translation="MSLALNFRPKTLDEILGQKELVEVFKKFISMQKLPHSLFFGPAG  
CGKTTFARVAKDFGLDFYEFDGGNFKLEDLRKIIENYKNSLYKPLIFIDEIHRLSKT

QQEMLLIPMENYRCIIIGASTENPYFVLSSGIRSRSMLEFEKNLGQKDLELLLKRVQQ  
 EIAFTIEDNAKEFLLKSSDTRAMLNLEFALVLNEKEITLENLKKLRNGVNSEGVSSK  
 DTHYILASALIKSLRGSVDAAIYYLARLIDAGESADFIARRLIIFASEDISNADPNA  
 LNLAVSTLTAVKNIGYPEARIILSQCVVYLASAPKSNSSYNAINRALDYVKNNPALEI  
 PNYLNNNHPEKKNYLPHHFGGWVKQNYLSANLKFYESKIGIGEEARLLENLNKLNKNIK  
 S"

gene complement(8870..10015)  
 /locus\_tag="DMACINML\_01530"

CDS complement(8870..10015)  
 /locus\_tag="DMACINML\_01530"  
 /inference="ab initio prediction:Prodigal:2.6"  
 /inference="similar to AA sequence:RefSeq:ADC27843.1"  
 /codon\_start=1  
 /transl\_table=11  
 /product="putative periplasmic protein"  
 /protein\_id="Prokka:DMACINML\_01530"  
 /translation="MKLLIPIIIVFFCFIIQIFYMGHINESFFYNLTQTQNPYYEIK  
 NVNFHKGFLNSKADFTIEDKYNLGLVSKLDFKFNNNYFSKFIAQGKLSNPFKLLDDKL  
 HNKELAWFKIQSIQNDINVSIIQFQDINLSNEGGNALWENVLTEILLDKDLKIKAIYSK  
 IGQVDFSQFYAKFYLNLDHQQKFEKPISFSNLIQFNESVEEFKDFCEINNHTISSF  
 YNKNIYFDDDNQTLKMHSQGKANNLSIDLTSQIYQSIDFDQIHFDLIYSQKPKDISD  
 DKLIFKPSNEELNLQIQNITLKKDNQDINIEGNIFLSMQSHKAHIQISSLKSPDEIFT  
 WGQFFGGLNQYFIKNEEGMFIMDLHYDSDAKTRLKINGNEFTDINLN"

gene complement(10118..10471)  
 /locus\_tag="DMACINML\_01531"

CDS complement(10118..10471)  
 /locus\_tag="DMACINML\_01531"  
 /inference="ab initio prediction:Prodigal:2.6"  
 /inference="similar to AA sequence:RefSeq:CAL34369.1"  
 /codon\_start=1  
 /transl\_table=11  
 /product="putative periplasmic protein"  
 /protein\_id="Prokka:DMACINML\_01531"  
 /translation="MKKGILIASALLTGSMLLADSVKLQGTIAEVYDNNKTLIDSIY  
 GGQMAVRILPNTEIDMDNCGIFGIDKHGKFKDLKVGDFLEVKLYYPGYTSNPTQAPAI  
 PVAREIEIECYKKAY"

sig\_peptide complement(10412..10471)  
 /locus\_tag="DMACINML\_01531"  
 /inference="ab initio prediction:SignalP:4.1"  
 /note="predicted cleavage at residue 20"

gene 10656..15902  
 /gene="yfhM"  
 /locus\_tag="DMACINML\_01532"

CDS 10656..15902  
 /gene="yfhM"  
 /locus\_tag="DMACINML\_01532"  
 /inference="ab initio prediction:Prodigal:2.6"  
 /inference="similar to AA sequence:UniProtKB:P76578"  
 /codon\_start=1  
 /transl\_table=11  
 /product="putative lipoprotein YfhM"  
 /protein\_id="Prokka:DMACINML\_01532"  
 /translation="MLKNILVGLILSFLLIACSSEKNKNSSELIRAQSQGLLKNHEAV  
 FVEFKAIIVDFDEMSIDAKINSKNSKILLTKASDSRFLDLTYLEANQNYKIEFIYKN

IPIVLEFQTGWIENFTYKAKLEQDEEKAYLHLNYSFGNTYNWQFKDKTQEGLKITLDG  
KELAFNLGEFSLDTHDIKLLDKPQELVLTDEKIMGFKEAKVLQFQIPSKPKDNDFRL  
ISAEKQDIATLKFSELAENQAFQDFIQISPELNFRASVVGKELKISANFEPGEKYQ  
VKIAKGLKSNQGLINKGEEANITLQKDLDPVSLVANDGVFLPSGAEYQVYIKSRNVKK  
IHLKVSQIFSNISEYLRYNLGVGKDDSTQEAIFYSSDGFNYVAKKVIDKKIELKNQK  
NTWISSALDSDLKKGSGIFSVLSVDANDLDYKGENVYRIINKASVSKNLIFSNIAL  
SAQNLNKQLVHARDFSKNEALENKIELVSKQNQILQSQNTDSNGDAKFQIQEDDEI  
LYILASKENQISVLRFSNPLSTDGYDVEGDQNHMIKAFIYTRGVYRAGDSVHLSVV  
ARENTPKHPINFTLINPKNQKIIENRILKSQNDIYYTQINLDKNAINGLYRANFNI  
AGVEFSKDILVQSVVNRKVELNADENRSLDDGSLNYELSSKYLFGALASNLKYQSV  
VYFSPKNYHNSKYKDYIFTNPSSLIIASADDKGNLDEKGRVQSSVEIPENILNSQGY  
NFNARIVSEVFEKGRSVKAVKDVNLNRYDYFVGMKALANSYVSEGETIDFYAIVSDL  
KEKLVSGKTLERYIQNDYWWWDYDSYDEF LRSIKQDTNTKLEKELTSSSEPMKF  
SFNTSNYYGQMFIELIDKESEVSTGQSFYVSSWGEPSYADVSSLKIKSDKNKYKIGQ  
SAKIEFESVAGAKALITLSSNSKIIDRFVMDTQDESTSIELAMKKEYAPNIYVSVSLF  
QDYNKIDNDRALRFGVIPLYVEDENTKLDLELKTDPKILPNSDFEIEIQSKDKRAF  
YTVAIVDEGLLDLTDFTKTPDIWKGIFYAKTGFTLKYDTYSQIIPKFTGGDSVLGGLRV  
DKNRDDSAQRFKPVALFNTPARSDETGFAKLFKMPSYMGSVRVMVANENDAYGSVS  
KDIQVSAPLVMLETLPRTLKIGDNFTLLTQIFKTENRIKATLSVRSKNSLIKISPD  
QTIDFKSATNLEVMMDANVSDNRIGKELLEFEKSEDYTYKNEIEIDIKPINAYTYEN  
NTSLIKAGESKEFIIKDYILGTTNATLKLSPPTILDMDKRIKYL LNYPYGCIEQTSSA  
VLPQLFLDKFSTEFKQKAINNINAARIYSNFQTADGGFAYWQGGDESNAWGSNYAG  
MFLILAKQNGYFVPDSMYERWLKYEQNFVQKSVYRDYMMDIKANSLYLLAMAKKPNIS  
EMNLLYDNLNTLSTEAKWQLAAAYKLAGVEDTAKQIASKISIEPDSKYSFYTYGSLVR  
DEAIIANAYKQIYGTNNEELLQKISDTLLSKDYLSQSTGYALYALAMGANLENMNE  
FMDATLKIDDQAYTINQNMQIFSFNDEKAIVSANKDIFVSVFVGVKASENSAFSNK  
ISLDRAFYEKGNKISPSEIGSGQTFYMRISVSLNEGANYVSNIALTQILPSGWEVSN  
TLLDDNTPSFIKNSNYDFIDVRDDKIMWFFGLNKNRTHHFYIKLNAITPGSYTSLGAY  
AEAMYDDTYRTLSESEKVVVKR"

gene

15910..18132  
/gene="pbpA\_2"  
/locus\_tag="DMACINML\_01533"

CDS

15910..18132  
/gene="pbpA\_2"  
/locus\_tag="DMACINML\_01533"  
/inference="ab initio prediction:Prodigal:2.6"  
/inference="similar to AA sequence:RefSeq:CAL34655.1"  
/codon\_start=1  
/transl\_table=11  
/product="penicillin-binding protein"  
/protein\_id="Prokka:DMACINML\_01533"  
/translation="MKNALKIFSLLLLFFLAYVFYVYFSFDKNTLLDDFKSRYSKILY  
DKNGEILSVFLNDEEQWHIKSTDIPKRLKIAVINYEDRKFYSHFGVDFLALMRAFVNN  
FNSTQRSGASTISMQTIKLWDDKDRTYFNKFNEIIQSFALENAFSKDEILKLYLSNAP  
YGGNLVGYEAAILFYFDKNPKDLTWAQAALLAILPNQPGLINLEKNKTKLLNKRKLL  
AKLYERKLINKDIYELSLKEPLPNFKPRKNIAPHLALRLNDDNKEIFSSIDKKIQLK  
IEKKAKEFSYTLQQKGIQNLAIILADTKTRKVLAYVGSQDFYDMANLQINGNTAKRS  
VGSTLKPFLYALSIDEGIIAPESILLDVPTFFSNFNPQNANKKYYGIISAREALQRS  
NVPFVSLQDYGYEKFFYKLTFLNFEDENYKRYGLSLILGTELSLEDLVKLYLGLA  
NYGELANLSFIRDENLSGVVRFMSKGSAYLTLEAMKELQRVGLENYNKEKIIISWKTGT  
SYGRKDAWAIGATPKYTLGVWVGNFNGEANANLYGVSIAGDLLFEILGLLDEVDFEFA  
PSDDLMTIKLDSISKYRYDENLNTSYIHTLYPKEANILRTSPFLKKVYEQGKELDSK  
DIHFKDAKAFIKLDLPAYALHFFQQRNFKFSSKKGVNIIPKDNLKLILARDLNGMKG  
LVAKVANLNNEKLFWYLNQKLIYEGNENTQNLNLKEGKYQLFIISQSGEQDVFWEIK



```

"
gene      18239..20230
          /locus_tag="DMACINML_01534"
CDS      18239..20230
          /locus_tag="DMACINML_01534"
          /inference="ab initio prediction:Prodigal:2.6"
          /inference="similar to AA sequence:RefSeq:CAL34373.1"
          /codon_start=1
          /transl_table=11
          /product="putative oligopeptide transporter, OPT family"
          /protein_id="Prokka:DMACINML_01534"
          /translation="MQKTHSLPELTLRGLLLGSILTVIFTASNYYLGLKVGTLFSSSI
PAAVISMAVLAFFKTSNILENNMVQTQASAAGTLSSVIFVIPGLFMCYWFSEFPLWQT
FMVCLCGGGLGVLFITPLRRAMVVESKLAYPEGRAAAEILKVTNKDQSDKKGKQGIKE
IALGSFIAAFFSLLSNGFKLAASESSLAFIWNKMAFGFSAGYSLALLGAGYLVGLAGA
IALFVGMFLAWGVFTPYLSSFEFDGVKNASELASSVWAAKVRLIGTGATAIAALWTLI
ELLKPVISGIKEIINKVTISNTKSQESTDQDLSLKSIFILFIILTIGLFITFYSFVSD
ANLNSYYQILFAVGTFFIAVLIGFFVAAACGYMAGLVGSSSSPISGIGLIGIISSLV
ILLGANLFDPPMLSKFAIALAIFTTSVIVATAAISNDNLQDLKTGYLVGATPWKQQV
ALLIGCVFGALAIVPVLNLLYQAYGFVGAMPREGMDVSSALAAPQANLMSTIAQGIFN
HNIWSYITFGVVIGIFIIIDKILRKNGNLSLPLAVGIGIYLPSPVNIPLVIGGIL
KYFVMRYLAKKYENNSHKSEKITTHEQKGILFASGLIVGESIFGVIIAAITVFSVSMG
GSESPLKLSFLNIHNNELLGLVFFIGVVLYFIKRIVKTR"
gene      20507..21310
          /gene="uppP"
          /locus_tag="DMACINML_01535"
CDS      20507..21310
          /gene="uppP"
          /locus_tag="DMACINML_01535"
          /EC_number="3.6.1.27"
          /inference="ab initio prediction:Prodigal:2.6"
          /inference="similar to AA sequence:RefSeq:CAL34374.1"
          /codon_start=1
          /transl_table=11
          /product="undecaprenyl-diphosphatase"
          /protein_id="Prokka:DMACINML_01535"
          /translation="MDNLHALILGIIEGLTEFLPVSSTGHMILGTTVLGIDINEFWKS
FLIIIQLGSILAVLFVWRKLFKGLDIWFKLAVGFFPTGLIGLVLYKYLKELFNGYVV
VAMLILGGIVFIVIELAHKNKEYKTNLSLEKISFLQAFFIGIIQSLAMIPGTSRSGASI
IGGLLLGLNRKTAAEFSFLLAIPTMIVATAYNIYKEPELLSNANALIPLSIGFITAFV
VAVFVIKFFLKFISKDFDFIPFGIYRIVLGILFFYLYYSGILNAGSEFKL"
gene      21441..23249
          /gene="thrS"
          /locus_tag="DMACINML_01536"
CDS      21441..23249
          /gene="thrS"
          /locus_tag="DMACINML_01536"
          /EC_number="6.1.1.3"
          /inference="ab initio prediction:Prodigal:2.6"
          /inference="similar to AA sequence:RefSeq:CAL34375.1"
          /codon_start=1
          /transl_table=11
          /product="threonyl-tRNA synthetase"
          /protein_id="Prokka:DMACINML_01536"

```

```

/translacion="MEKEVIAYLDDEKIVDSQSKNSSDLKEIYFDNSKQSLEVIRHSC
AHLMAQAIKSLYPEAKFFVGPVIEDGFYYDFRVNSKIGEEDLVKIEKKMKEFAEAKQE
IEKYEITKSEAIKFKDDDLKQEVLLRIPDGKVSIIYKQGEFEDLCRGPVHPNTKFLRN
FALTRVAGAYLGGDEKREMLTRIIYGTAFAADKESLKEHLRIIEEAKKRDRKLGTELKL
FTFDDEIGGGLPIWLSNGARLRKLEQMLYKIHRLRGYEPVRGPELLKADAWKISGHY
ANYKENMYFTQIDEQEYGIKPMNCVGHKIYQSDVRSYRDLPLKFFEYGVVHRHEKSG
VLHGLFRVREFTQDDAHIFCMPSQIKEQVLEILAFVDNLMKLFDFSYEMEISTKPAKA
IGDDEIWDATKALKEALDEQGLKYGIDEGGAFYGPKEIDIKITDALKRKWQCGTIQV
DFNLPERFKLEYTDSNNEKKQPVMLHRAILGFSERFIGILTEHCAGEFPFFIAPTAVG
IVPISDSHAAYAKEIQRALLELNIDSEVYEKNESSLKIRTAEKQKLPMLVLVGDVEE
AKRSVALRDRRAKEQKNLSLEEFINLVKEKMSEVHF"
gene 23246..23764
      /gene="infC"
      /locus_tag="DMACINML_01537"
CDS 23246..23764
     /gene="infC"
     /locus_tag="DMACINML_01537"
     /inference="ab initio prediction:Prodigal:2.6"
     /inference="similar to AA sequence:RefSeq:CAL34376.1"
     /codon_start=1
     /transl_table=11
     /product="translation initiation factor IF-3"
     /protein_id="Prokka:DMACINML_01537"
     /translation="MSKEKEVLLNEEIRADEIRCIGDDGKAYGISSDEALEIANRLG
LDLVMIAADAKPPVCKIMDYGKFRYQEQEKKQKEAKKKQKVIDIKEIKLSVKIAQNDIN
YKVKHALEFLEQGKHVRFVFLKGREMATPEAGVALLEKIWAMIENDANRDKEPNFEG
RYVNMLVTPKKA"
gene 23803..24897
      /locus_tag="DMACINML_01538"
CDS 23803..24897
     /locus_tag="DMACINML_01538"
     /EC_number="2.1.1.72"
     /inference="ab initio prediction:Prodigal:2.6"
     /inference="similar to AA sequence:RefSeq:CAL34377.1"
     /codon_start=1
     /transl_table=11
     /product="putative DNA modification methylase
(adenine-specific methyltransferase)"
     /protein_id="Prokka:DMACINML_01538"
     /translation="MKENPSFLKEQIITYLGNKRALLGFLNKGFKVSKKELNQDKFSF
CDVFSGSGVSRFAKAHSHFIIANDLEDYSKLINKCYLSNKDKNLTELKHYHKILTQ
NLEFQAGFISELYAPKNESCIOKDERVFYTLKNALYLDTLRQKIEKEIPEELKHFFIA
PLIYEASVHSNTSGVFKGFYKGRDGVGKFGGEAQNALKRIKGDIELKMPIFSNFSCFE
EYVQKDANLLAKELENIDVAYLDPPYNQHPYSSNYFMLNLIANYQRPDEISKISGIPR
DWNRSVFNKEKQAEDALFELISDLRAKIILLSYNCEGFVKKKFLKRLQSLGKQCQILE
QKYPTFRASRNLNRSIHIHEQLYILKKNL"
gene 25113..26141
      /gene="argC"
      /locus_tag="DMACINML_01539"
CDS 25113..26141
     /gene="argC"
     /locus_tag="DMACINML_01539"
     /EC_number="1.2.1.38"
     /inference="ab initio prediction:Prodigal:2.6"

```

```

/inference="similar to AA sequence:RefSeq:ALF91278.1"
/codon_start=1
/transl_table=11
/product="N-acetyl-gamma-glutamylphosphate reductase"
/protein_id="Prokka:DMACINML_01539"
/translation="MRLKVGILGASGYAGNELVRILLNHPKVEISYIGSSSSVQSYM
KLYPNTPLNLI FEDKNLDELELDVLF TATPHEFS AKLFSETLLKMKIIDLSADFR LK
NPKDYELWYKFTHPNQELLKNAVYGLCELYQEEIKNANLIANPGCYTTCSILSLYPLF
KEKMIDLNSVIIDAKSGVSGAGRS AKVENL FCEVNENIKAYGLASHRHTPEIEEHL SY
AAGEKITLQFTPHLVPMQRGILT TAYANLKHSVSEKEIREIYQKYYQDRKFIRLLPPQ
SFPQTRWVKSSNFADINFSIDERTNRIIVLG AIDNLIKGAAGQAVQNMMLMDFDEDE
GLKFFANL"
gene 26152..26598
/locus_tag="DMACINML_01540"
CDS 26152..26598
/locus_tag="DMACINML_01540"
/EC_number="2.3.-.-"
/inference="ab initio prediction:Prodigal:2.6"
/inference="similar to AA sequence:RefSeq:CAL34380.1"
/codon_start=1
/transl_table=11
/product="putative acetyltransferase"
/protein_id="Prokka:DMACINML_01540"
/translation="MQVRAMQKSDYEGVYKLWCDIKGFGIRSIDDSKENIERFLDRNP
NLSAVAVDQEI VGSILCGHDGRTGGFYHVCVHKDHRKKGIAHEMTKFCLEALKSEKI
NKIALIAFKSNDLGNFVKHYGFTLREDANYYDLSLNSHNQTSFNV"
gene 26608..27447
/gene="argB"
/locus_tag="DMACINML_01541"
CDS 26608..27447
/gene="argB"
/locus_tag="DMACINML_01541"
/EC_number="2.7.2.8"
/inference="ab initio prediction:Prodigal:2.6"
/inference="similar to AA sequence:RefSeq:CAL34381.1"
/codon_start=1
/transl_table=11
/product="acetylglutamate kinase"
/protein_id="Prokka:DMACINML_01541"
/translation="MQKYLEKANV LIEALPYIRKFSSKIILIKYGGSAMENEELKHCV
MQDIAL LKLVGLKPIIVHGGGKDISKMCEKLGVKSEFNNGLRVSDQATTEVASMVLNY
INKNLVHSLQNLGVKAIIGLCGKDGGLLECVQKDKNLGFVGEIQKVNSSILQDLLEKDF
LP I IAPIGM DENFNTYINADDAACAI AKALKA EKLAFL TD TAGLYENFEDKNSLISK
ISITQAKALVDKIQQGMYV K LKSCIDACESGVKKVHILDGRVKHSL LLEFFTDEGIGT
LVG"
gene 27457..28641
/gene="argD"
/locus_tag="DMACINML_01542"
CDS 27457..28641
/gene="argD"
/locus_tag="DMACINML_01542"
/EC_number="2.6.1.17"
/inference="ab initio prediction:Prodigal:2.6"
/inference="similar to AA sequence:RefSeq:CAL34382.1"

```

```

/codon_start=1
/transl_table=11
/product="putative acetylornithine/succinyldiaminopimelate
aminotransferase"
/protein_id="Prokka:DMACINML_01542"
/translation="MNYKEQSHIIPTYKRFDIVLESGEGVYLLDDKGGKYLDFFSSGIG
VCALGYNHAEFNAKVKAQVDKLLHTSNLYNENIAQAAKHLAKASGLERVFFTNSGAE
SIEGAMKVARKYAFNKGKGGNFIAFKHSFHGRTL GALSLTANEKYQKPKPLISGVK
FAKYNDFSSVERLVNEKTCIILLESVQEGGVNPAQKDFYKALRKL CDEKNILLIADE
IQCGMGRSGKFFAYEHSGILPDVMTSAKALGCGLSVGAFVVSEKVAQKSLEAGDHGST
YGGNPLVCAGVNAVFEIFKKEKILENVSKLTPYLEQSL ENLIKEFSFCKKRKGLGFMQ
GLSLDKSVKVAEVIKCCQENSLLLISCGENDLRFLPPLII EKSHIDEMSEKLRKVFS
FE"
gene complement(28661..29290)
/gene="pcm"
/locus_tag="DMACINML_01543"
CDS complement(28661..29290)
/gene="pcm"
/locus_tag="DMACINML_01543"
/EC_number="2.1.1.77"
/inference="ab initio prediction:Prodigal:2.6"
/inference="similar to AA sequence:RefSeq:CAL34383.1"
/codon_start=1
/transl_table=11
/product="protein-L-isoaspartate O-methyltransferase"
/protein_id="Prokka:DMACINML_01543"
/translation="MNAFEQKRCQSM AEEIAQKVFINEELFNAFCQIPREIFSP LKAH
AYRLDALPLANSQWISSPLTVAKMTMALNFKDADSVLEIGCGSGYQAAILSKVIRRVF
TIERIENLAKKAAQSFRELELFNINVKFEDGQNGWKNYAPYDRILFSAYTTQIPEILL
DQLSDGGILVAPILHNGKQFITRITKNGTHLQKEILEECLFVPIVDGKE"
gene 29409..29948
/locus_tag="DMACINML_01544"
CDS 29409..29948
/locus_tag="DMACINML_01544"
/inference="ab initio prediction:Prodigal:2.6"
/inference="similar to AA sequence:RefSeq:CAL34384.1"
/codon_start=1
/transl_table=11
/product="putative acetyltransferase"
/protein_id="Prokka:DMACINML_01544"
/translation="MLIRFKDKIPNLGQNVFVAEGAKIIGEVEIGDESSVWFNCVLRG
DVNFIKIGKRTNIQDLTTIHVWHREFNEDGSLKDAGFPTCIGDDVTIGHNCVIHACKI
GSRVLVGMNAVIMDDAAIGDSDIVGAGSVVTGKGFPPKSLILGNPAKLVRELSDEEV
AFLKQSALNYVEFKNDFLN"
gene complement(30061..31443)
/locus_tag="DMACINML_01545"
CDS complement(30061..31443)
/locus_tag="DMACINML_01545"
/EC_number="6.3.4.21"
/inference="ab initio prediction:Prodigal:2.6"
/inference="similar to AA sequence:RefSeq:CAL34385.1"
/codon_start=1
/transl_table=11
/product="putative transferase protein"

```

```

/protein_id="Prokka:DMACINML_01545"
/translation="MKKDFYTKPNNTLLCDFYELTMMQGYFLNGFENKIAYFDIFFRK
IPDNGSFAIFAGLEDILEFVSCLHFDEGDIAYLRSQGIFKEEFLRYLKNFKFKGEIYA
MQEGEIIFPNEPLMIKANTIEAQILESFLLLSINHQS LIATKANRIVRAAKNLSVLE
FGTRRAHGSEAALKGARAAIIGGCKASSCTLAGKNYGIMTSGMTAHSWVQMFDELSA
FCRYLELYPQNPIILLIDTYNYKQGLENAIKAFKKFKIKQCGVRIDSGNLEILSKEIRA
ILDKNLKECKIIVSNLSNEKSIDKLLKNNAPIDAFGVGEKLITASSDPIFGCVYKLV
AIEENKLITPKIKISEDKQKTTLPHFKKLFRIYDKNTQKMLFDELYIYNEKLPQLDEN
LERKELLKCVFKEGKILNKQKNVEEIALYTKSQISKLEKFLDFNNKEKYKIKLSKDL
TKLRQNFTNK"
gene      complement(31465..32487)
          /gene="nrdB"
          /locus_tag="DMACINML_01546"
CDS      complement(31465..32487)
          /gene="nrdB"
          /locus_tag="DMACINML_01546"
          /EC_number="1.17.4.1"
          /inference="ab initio prediction:Prodigal:2.6"
          /inference="similar to AA sequence:RefSeq:CAL34386.1"
          /codon_start=1
          /transl_table=11
          /product="ribonucleoside-diphosphate reductase beta chain"
          /protein_id="Prokka:DMACINML_01546"
          /translation="MQRKRIYNPSSNETLDRKVFSGNPHGILNFTKAKYTWALKLWD
LMEANTWFPKEVDTTKDALDYRCNLTAGKRMVDLWVSQLISMDSFQTNNLADNINPY
ITAPEINAVLARQAYEEANHSKSYAVMVEAICDNTDLIYEMEKHDETREKNDFISSI
YEELAGDVDDNKL LAMVANQILEGVYFYSGFTAIYALARAGKMLGSAQMIRFIQRDE
ITHLLLFQNMINSVRKERPDLFNENNINKIYDMFKKAGDLEIKWGYITQNQIMGFTD
DIIIEYIHYLVQQLVAINLDKIYNAKHPIKWVDDFSKFNDQKSNFFESKVTNYSKGS
ISFDDF"
gene      complement(32503..32913)
          /locus_tag="DMACINML_01547"
CDS      complement(32503..32913)
          /locus_tag="DMACINML_01547"
          /inference="ab initio prediction:Prodigal:2.6"
          /inference="similar to AA sequence:RefSeq:AAW34875.1"
          /note="conserved hypothetical protein"
          /codon_start=1
          /transl_table=11
          /product="hypothetical protein"
          /protein_id="Prokka:DMACINML_01547"
          /translation="MKTAKIASRWLRF RALLIDIFLIYVPILYLFYFLLGSKEAFLN
NSYITALCTFLFGFIQALFLASKAQSPGLKAYDLYLIDLKTGKKITFFRILLRYIIFI
ISFGLIFGLFISFLRKDKLNLHDILTQTCIVTKI"
gene      complement(32914..33522)
          /gene="pyrE"
          /locus_tag="DMACINML_01548"
CDS      complement(32914..33522)
          /gene="pyrE"
          /locus_tag="DMACINML_01548"
          /EC_number="2.4.2.10"
          /inference="ab initio prediction:Prodigal:2.6"
          /inference="similar to AA sequence:RefSeq:CAL34388.1"
          /codon_start=1

```

```

/transl_table=11
/product="putative orotate phosphoribosyltransferase"
/protein_id="Prokka:DMACINML_01548"
/translation="MDLEQIYKDCGAYLQGHFLLSSGKHSKFYLSAKVLENPKLAAK
LCDELAKIIAEFNIEFDSICSPALGGILAGYELARACDKRFIFTERVNGEMTLRRGFE
VKKGERFIICEDIITTGGSALSAKIIESLGGKVLGFAALANRGFCAVENLKNPRKPS
AKLPDNLPLFTLGNFDFQIYDENDCPLCKEGSKAIKPGSRGN"
gene complement(33525..34082)
/locus_tag="DMACINML_01549"
CDS complement(33525..34082)
/locus_tag="DMACINML_01549"
/inference="ab initio prediction:Prodigal:2.6"
/inference="similar to AA sequence:RefSeq:CAL34389.1"
/codon_start=1
/transl_table=11
/product="ribosome recycling factor"
/protein_id="Prokka:DMACINML_01549"
/translation="MINEILNKQKTQSEKSLEALKKDFTTLRTGKVNTHILDHIQVDY
YGSLTPLNQVATVLASDASTISITPWEKPMLKTIESAIAAANIGVNPNDGESVKLFF
PPMTREREENVKQAKAMGEKAKVSVRNIRKDANDAVKKLEKDKAISEDEAKKAYDEV
QKLTDTYTAKIDESVKNKESELLKV"
gene complement(34099..34455)
/locus_tag="DMACINML_01550"
CDS complement(34099..34455)
/locus_tag="DMACINML_01550"
/inference="ab initio prediction:Prodigal:2.6"
/inference="similar to AA sequence:RefSeq:CAL34390.1"
/codon_start=1
/transl_table=11
/product="putative protein-export membrane protein"
/protein_id="Prokka:DMACINML_01550"
/translation="MITLLIILQFVIVVIICIAVLLQSSSIGLGAYSGSNESLFGAK
GPAGFLAKFTFIMGILLIANTIGLGLYNSTSKDSLAEKIKIETNTSIPAAPNAINVP
AIPSAPQIPNEINTSK"
gene complement(34561..35256)
/locus_tag="DMACINML_01551"
CDS complement(34561..35256)
/locus_tag="DMACINML_01551"
/inference="ab initio prediction:Prodigal:2.6"
/inference="similar to AA sequence:RefSeq:CAL34391.1"
/codon_start=1
/transl_table=11
/product="putative integral membrane protein"
/protein_id="Prokka:DMACINML_01551"
/translation="MSLYDRDYSRSREFENTRSSELGIFIKQTYQLFAASLLAATVGA
YVGIYALAAFFIQSQVTFWILFAVEIGLLIALQFKKREAPNLILLFGFTFCGLTLT
PLLISVLALPAGGVIIAQAFALTTVAFAALSIFAMNTKKDFTLMGKALFIVLIVVAA
SLLNIFFQSSLLNLTISAVAAILFSFYILYDTQNIIRGNYETPIEGAVALYLDFVNLF
VLLNILRSFNSR"
gene 35416..36051

```

```

/ gene="cynT"
/ locus_tag="DMACINML_01552"
CDS 35416..36051
/ gene="cynT"
/ locus_tag="DMACINML_01552"
/ EC_number="4.2.1.1"
/ inference="ab initio prediction:Prodigal:2.6"
/ inference="similar to AA sequence:RefSeq:CAL34392.1"
/ codon_start=1
/ transl_table=11
/ product="carbonic anyhydrase"
/ protein_id="Prokka:DMACINML_01552"
/ translation="MDNLISGAIKFMQEDFKEHEELFESLKNKQNPHTLFIGCSDSRV
IPNLITNTGPGELFVIRNIANIVPPYRVGQDYLAATSAIEYALNSLRKINIVVCGHSN
CGGCNALYYSDEELDKIPNVKKWLTMLDPIKRDVTIFARDDIAMRSWLTEKLNLVNSL
QNIFTYPGVQEALDEGRLEVHAWYYIIETGEIYEYDFKAKIFKLIQNRKTQ"
gene 36048..37928
/ locus_tag="DMACINML_01553"
CDS 36048..37928
/ locus_tag="DMACINML_01553"
/ inference="ab initio prediction:Prodigal:2.6"
/ inference="similar to AA sequence:RefSeq:CAL34393.1"
/ codon_start=1
/ transl_table=11
/ product="putative mechanosensitive ion channel family
protein"
/ protein_id="Prokka:DMACINML_01553"
/ translation="MKKIIILFLLGISCLWGDEFRLIDTNTSAQDKSVYSLVQKYIDL
NRQIKFEFKKNDENSSSYDGILSEFEKDKKSILSKMPDMIVKQQINEKAVESFLKTRQ
NLDDLQKKSINKPYVYVDTTLNIIYLDVVKSFYSSLFLEKLFKNAANSESIISTVVK
AMENLQNSTNIDL SIYKAKINNPSELEKISNKEEVIFNAVDAYVEILKYLRANADLLE
SNYIFSLLELQWIDRINEIANIDFINTGKIVISLLVLAFFMSLRFFSNIVYFVILVR
LVYRNKSDADDIKVIFIDNIKKPVGFLLVCYAISLCLTIITYPTPLSINLSNLFHIIY
AVLIAWLILRILDGYGVVLSKLAQKSGKKEVVNLVIKILYFVIFVIALLYILAQLGF
NISAIASLGIGGLAVALAAKDIIANFFASILLFDNSFNQGDWVEVSGVEGTVVETG
LRKTTIRTFDNCLVFLPNSTIMGANIKNWSKRRMGRHVKIYLVGVYDATPEKLENCVK
DLKELLYTSPLVAHEDDGALKYGDHTTKYRQNLVSINDLEGYKNACYVALSEFADSSI
NIELYFYTKAIDAKEFREARQELMLEFMRIIEKNGLTFAPPSRSIYIENLPPLDLKPK
VV"
gene complement(37967..38938)
/ locus_tag="DMACINML_01554"
CDS complement(37967..38938)
/ locus_tag="DMACINML_01554"
/ inference="ab initio prediction:Prodigal:2.6"
/ inference="similar to AA sequence:RefSeq:CAL34394.1"
/ codon_start=1
/ transl_table=11
/ product="NifU protein"
/ protein_id="Prokka:DMACINML_01554"
/ translation="MGKNSLIGGSIWDEYSQKVQDRMNPQHMGFEEDAKNRNAKL
IVADFGAESCDAVRLFWLVDEKTDTIIDAKFKSFGCGTAIASSDTMVDLCIGKTVDE
AVKITNLDVEFAMRDNPETPAVPPQKMHCVMAYDVIKQAAAHYKGINPEDFEDQIIV
CECARVSLGTIKEVIKLNLDLHTVEEITQYTKAGAFCKSCVKPGGHEKREYYLVILAE
TRAEMDREKLKNAVKSDVAFDEMTLVGQLKAVEAVLDAEIRPMLHNDGGDLEVIDIQK

```

AEGAAIDVYIRYLGACSGCSSGSGATLYAIETILQEELSPNIRVMPV"  
 gene complement(38951..40132)  
 /gene="iscS"  
 /locus\_tag="DMACINML\_01555"  
 CDS complement(38951..40132)  
 /gene="iscS"  
 /locus\_tag="DMACINML\_01555"  
 /EC\_number="2.8.1.7"  
 /inference="ab initio prediction:Prodigal:2.6"  
 /inference="similar to AA sequence:RefSeq:CAL34395.1"  
 /codon\_start=1  
 /transl\_table=11  
 /product="cysteine desulfurase (NifS protein)"  
 /protein\_id="Prokka:DMACINML\_01555"  
 /translation="MKVYLDNNATTMLDPNAYELMLPFLKDMYGNPNSLHQWGSATHP  
 ALREAMDKLYAGLGANDLDDIVITSCATESINWVLKGIYFDHILDKERNEVIISSVEH  
 PAVAAAAQFLKSLGVKLIELPVNEEGVSTPQDLQNVISDKTALVSMWANNETGMIFD  
 IQKMAEITHEFGALFHTDATQAVGKIKVNLNQVGVDFAFSAHKFHGPKGVGGLFIKK  
 GLKLTPLLHGGEHMGRRSGTLNVPYIVAMAEALRIANTMLEFEDSHIRRLRDKLEDS  
 ILALPDTSVVGKREHRVPNTILASIKGVEGEAMLWDLNKNNGIAASTGSACASEALESN  
 PIMEAIGAENDLAHTALRLSLSRFNTEDEIDYAAKQIKAATERLRAISCTYAYNPNNY  
 K"  
 gene complement(40306..41472)  
 /locus\_tag="DMACINML\_01556"  
 CDS complement(40306..41472)  
 /locus\_tag="DMACINML\_01556"  
 /inference="ab initio prediction:Prodigal:2.6"  
 /inference="similar to AA sequence:RefSeq:CAL34397.1"  
 /note="hypothetical protein Cj0243c"  
 /codon\_start=1  
 /transl\_table=11  
 /product="hypothetical protein"  
 /protein\_id="Prokka:DMACINML\_01556"  
 /translation="MTINSANPYQNLALS NPLQNSQALNLIKDKKGSNLEENENNLEN  
 LNYIFNTTSYASEFGFRIDEKGF FEKDLN KIANIPESYNINIKSVRSIAKELTRQDAN  
 LNYNKIDLPYLLNSYHSSLKSINLEFSENDNANLSRDMISKFATGFSTENGEFLGKIS  
 RIYNNQEELNSTLSKTLNLNTLMLDNKITNFHFDRALNNTSSNEILKPYLTKNAEVSK  
 SGLLMNFIYHDIKTQNDNELNFFMKPASLELNAHTNFQKILRGEMDIKDYIKQQNEQK  
 MSFDLYLYVNGVDKKTASQDKLSVFFQQYVNYQKMDMLREFANSSSIFQIYIDQNHSE  
 FNSLKEEYQSQNKDLEKLDNANNMRSNSIENFLNRRQKQANLNKILNSYLSVLL"  
 gene 41627..41818  
 /gene="rpmI"  
 /locus\_tag="DMACINML\_01557"  
 CDS 41627..41818  
 /gene="rpmI"  
 /locus\_tag="DMACINML\_01557"  
 /inference="ab initio prediction:Prodigal:2.6"  
 /inference="similar to AA sequence:RefSeq:CAL34398.1"  
 /codon\_start=1  
 /transl\_table=11  
 /product="50s ribosomal protein L35"  
 /protein\_id="Prokka:DMACINML\_01557"  
 /translation="MPKMKS VKSAVKRFKVGKNIKRGSAFRSHILTKKPAKMRDLR  
 TAKYVHSTNVKAVEKMLGI"



gene 41914..42267  
/locus\_tag="DMACINML\_01558"

CDS 41914..42267  
/locus\_tag="DMACINML\_01558"  
/inference="ab initio prediction:Prodigal:2.6"  
/inference="similar to AA sequence:RefSeq:AJK82170.1"  
/codon\_start=1  
/transl\_table=11  
/product="50S ribosomal protein L20"  
/protein\_id="Prokka:DMACINML\_01558"  
/translation="MARVKTGVVRRRRHKKVLKLRGIFYSGRRKHFRKAKEQLERSLV  
YAYRDRRRKKRDFRRLWIVRINAACRLNDSLKSFINGLKKAGIELDRKILADLAMND  
AAAFKIAEAAKKAL"

gene 42553..43416  
/locus\_tag="DMACINML\_01559"

CDS 42553..43416  
/locus\_tag="DMACINML\_01559"  
/inference="ab initio prediction:Prodigal:2.6"  
/inference="similar to AA sequence:RefSeq:CAL34402.1"  
/note="hypothetical protein Cj0248"  
/codon\_start=1  
/transl\_table=11  
/product="hypothetical protein"  
/protein\_id="Prokka:DMACINML\_01559"  
/translation="MATDMNEILLRSVEVLPPLPDTINKLRKYINESGSNVKIDEIAN  
IISSDPLMTAKLLRLANSPFYGFSREITSLPQVVSLLGIGNIVNTIMADSIRDSFKID  
VSPYGLDTADFVSKCSEETSFIMDWLGNEDKKLSHLLVPCSMMLRLGIVVFSNFLIQN  
KKDGEFLARLEKNFSDLSIVENEFLGVDHISFLGFLLYRWKFDDMLVETICFARSPH  
AARNEVKKSAYALSVVDHLFTPNNFSSFNIKASIALINEARSQGIDFNLDNFISKLP  
KEAKENLIKEG"

gene 43438..43914  
/locus\_tag="DMACINML\_01560"

CDS 43438..43914  
/locus\_tag="DMACINML\_01560"  
/inference="ab initio prediction:Prodigal:2.6"  
/inference="similar to AA sequence:RefSeq:CAL34403.1"  
/note="hypothetical protein Cj0249"  
/codon\_start=1  
/transl\_table=11  
/product="hypothetical protein"  
/protein\_id="Prokka:DMACINML\_01560"  
/translation="MKSIIILPPNEFLDHVVLNAEFHRLAGISKNAYKFWKKVEIGRYQ  
GTRIIFLHKNSILEKHREVLKQCSDSLGSFVLASAFCSFTGLAPSHLVKKNSSSIYKLL  
DLKEIHGIKFNVLKFFYDFLGLNYYQHIYIEKCHFFSPTPFKRIKITESMVGYY"

gene complement(43883..45193)  
/locus\_tag="DMACINML\_01561"

CDS complement(43883..45193)  
/locus\_tag="DMACINML\_01561"  
/inference="ab initio prediction:Prodigal:2.6"  
/inference="similar to AA sequence:RefSeq:CAL34404.1"  
/codon\_start=1  
/transl\_table=11  
/product="putative MFS (Major Facilitator Superfamily)  
transport protein"

```

/protein_id="Prokka:DMACINML_01561"
/translation="MRKTLKDKIKTLGLSSLGGTLEFYDFIIFAFFSSYISKNFPE
NLSPFWQLFNTYGIFAAAYVVRPLGGIVMAHFGDKFGRKKMFMLSILLMVIPTFALAF
IPSYESIGYLCVALLMLIRIAQGISIGGELPGAWIFVYEHSPKQRRTYIGFLTASVV
GGILLGSIVFLLMHKIYQEELYEAWRVPFFLGGIFGLISIYLRKFLSETPVFEQMR
KENVLEKFLKEVFKRAKAGVVISMLITWVLTGCIIVMILFIPKYMAEILQFDTNFQT
YLQMGGIFIFISLGCIIISGILADKIGIFKSGIIFSLFFGLACAFYHFHLYNTNANIILV
SIFYLMACFFGGVMNFCPLIMNEVFEAKIKFSGLSFSYNIAYAIAGGITPQLALLLHK
FAFANLDNAWRFSLGYYMFLIVLLALLSAFIFRYLNNTQRTYSQ"
gene complement(45196..45348)
CDS /locus_tag="DMACINML_01562"
complement(45196..45348)
/locus_tag="DMACINML_01562"
/inference="ab initio prediction:Prodigal:2.6"
/codon_start=1
/transl_table=11
/product="hypothetical protein"
/protein_id="Prokka:DMACINML_01562"
/translation="MAYDDEDLEFDDYEGEDEYAHNHHKSYNYDDDDYDFDEANDD
DFYEMD"
gene 45442..45915
/locus_tag="DMACINML_01563"
CDS 45442..45915
/locus_tag="DMACINML_01563"
/inference="ab initio prediction:Prodigal:2.6"
/inference="similar to AA sequence:RefSeq:CAL34406.1"
/codon_start=1
/transl_table=11
/product="molybdenum cofactor biosynthesis protein C"
/protein_id="Prokka:DMACINML_01563"
/translation="MELTHLDENNRPKMVDVSKQKDVSKRVATASGMISMSEEAFKAIK
NNTAKKGPVLQTAVIAAIMGAKKTSEIIPMCHPLMISKVETDIVEFPKDYTFKLIIVT
KCEGKTGVEMEALSGVSIIGLLTIYDMIKAIKDKTMKISEIVLESKEGGKSGKFVRS"
gene 45893..46156
/locus_tag="DMACINML_01564"
CDS 45893..46156
/locus_tag="DMACINML_01564"
/inference="ab initio prediction:Prodigal:2.6"
/inference="similar to AA sequence:RefSeq:CAL34407.1"
/note="hypothetical protein Cj0253"
/codon_start=1
/transl_table=11
/product="hypothetical protein"
/protein_id="Prokka:DMACINML_01564"
/translation="MVNLCDLKQEPVNYPTFWDYKVIFEAHVHAGALFEELLGQRDF
KYKHSNASSSGKYQSFLLSVYVDSKKDRLDIFEKLLKAKAFVL"
gene 46174..47310
/locus_tag="DMACINML_01565"
CDS 46174..47310
/locus_tag="DMACINML_01565"
/inference="ab initio prediction:Prodigal:2.6"
/inference="similar to AA sequence:RefSeq:CAL34408.1"

```

```

/note="hypothetical protein Cj0254"
/codon_start=1
/transl_table=11
/product="hypothetical protein"
/protein_id="Prokka:DMACINML_01565"
/translation="MKNTLIIFENSLSNLKKDEVKDLLEDLSFNLAYKQISQDPHNTK
KILNLLLVEFLTILKKDLDFDENVAKVIKALVKASIGDAQNVLYEYISEAELLNKQI
ENQKNLIKQISDNFLEFENILQECSFCNEFSSGLNDAILFDIEMLGILKETAESAFL
TTLEKAEDIELTSSEIAKSLVYNAICEAHFEKERILKISSIILNTAFEIANESMAYAK
DLCLGVIKGTRDGLAMEKFKTSLTYAKFEEDVSLKSKELIGIEDDFIALLKREIKE
QKNPSKDIVENLLEHLDNLFKFKRLAVESREQLLLVLNDIKKNPKINDFNRLTQRK
LHRFKQEILELEKVAGEKYKELNSKKAKKLGVRLLWERAKKLIK"
gene complement(47329..48087)
/gene="xth"
CDS /locus_tag="DMACINML_01566"
complement(47329..48087)
/gene="xth"
/locus_tag="DMACINML_01566"
/EC_number="3.1.11.2"
/inference="ab initio prediction:Prodigal:2.6"
/inference="similar to AA sequence:RefSeq:AAW34895.1"
/codon_start=1
/transl_table=11
/product="exodeoxyribonuclease III"
/protein_id="Prokka:DMACINML_01566"
/translation="MKLLSWNVNGLRAICDKNALDWIIKENIDFIGFQEIKAHEDKFP
KKIYEYFPKHMYSNSAKRAGYSGVMSLCNFDSEVKKCEFFDDEEGRVLEHRFKNIALF
NIYFPNGQKDEERLGFKMKFYADFLVYLEKLLKDGFEIICGDVNTAHKEIDLTHPKA
NANTSGFLPIERAWIDDLKLGFIIDTFREINGDIKEKYSWWSYRMKARERNVGRIDY
FFISTGLKDKLKNAFIRDDIFGSDHAPVGIEIDI"
gene 48204..49751
/locus_tag="DMACINML_01567"
CDS 48204..49751
/locus_tag="DMACINML_01567"
/inference="ab initio prediction:Prodigal:2.6"
/inference="similar to AA sequence:RefSeq:CAL34410.1"
/codon_start=1
/transl_table=11
/product="putative sulfatase family protein"
/protein_id="Prokka:DMACINML_01567"
/translation="MFKFKLSWFQVLFNSILITLLNFNLSFVYEKLSQNLTLVFL
IVAYFGLVHMIFSLIFVKYLTKILSIFFILSSCISLYFITFYGILIDSMDIQNVVQTD
VKEVKDLLSWRLVLSVIIIVLLFCIFILKIRIENNVEQEFFKRIRVRILSAFLGCFIFL
IFFMPLSKTFIPFFRTYNEIRMYNVPFYPIYAVYRYVRFKPKSEFKTIGDDAFKED
NATKLLVLVGETARAANYSLGEYAKNDTNFYTNKNNVVFDFNFSSCGTATAVSLPC
MFSLSKRQNYSSSEYQENVMDILQKTGVKASWIDNNSGKCKGVCDRLSDKQQLSSDWD
ENLLPSLKERLGNLDTQNIIVLHLQSGHPAYYKRYPSEFKFTPTCDTNELSKCASE
ALINTYDNTLLYTDYLLSEIIELLKEKKDYESSLLYLSDHGESLGENGIYHLGMPYAI
APRHQTHIPVIFWSSDENLMTTAQNHKSLNLSQDNLFSTLLGYFNIQTAVYEPSFDIL
NQALKAN"
gene 49751..50107
/gene="dgkA"
CDS /locus_tag="DMACINML_01568"
49751..50107

```

```

/gene="dgkA"
/locus_tag="DMACINML_01568"
/EC_number="2.7.1.107"
/inference="ab initio prediction:Prodigal:2.6"
/inference="similar to AA sequence:RefSeq:CAL34411.1"
/codon_start=1
/transl_table=11
/product="diacylglycerol kinase"
/protein_id="Prokka:DMACINML_01568"
/translation="MKPKYHLLNNARYALEGILALFKNEMAFRLELCVIIIPAIVFSFF
LDVSFLEHLFLIAVLILIVIVEALNSAIEACVDLITNEWHEKAKVAKDCASAAVFFSV
CLALFTWGFILGNLWL"
gene      50098..50340
/locus_tag="DMACINML_01569"
CDS      50098..50340
/locus_tag="DMACINML_01569"
/inference="ab initio prediction:Prodigal:2.6"
/inference="similar to AA sequence:RefSeq:CAL34412.1"
/codon_start=1
/transl_table=11
/product="putative bacterial regulatory protein, ArsR
family"
/protein_id="Prokka:DMACINML_01569"
/translation="MAVKIENLMREILGKKRFELLQFLCENADENGFVMVKISELEAR
LNQSKPTIIATFKFLEEKCLKFKLKNGFYQLCIPCD"
gene      50442..51446
/gene="pyrC"
/locus_tag="DMACINML_01570"
CDS      50442..51446
/gene="pyrC"
/locus_tag="DMACINML_01570"
/EC_number="3.5.2.3"
/inference="ab initio prediction:Prodigal:2.6"
/inference="similar to AA sequence:RefSeq:CAL34413.1"
/codon_start=1
/transl_table=11
/product="dihydroorotase"
/protein_id="Prokka:DMACINML_01570"
/translation="MTLKNPLDMHLHLRDESMGLVAPFSKDFRAGVIMPNLVPPLC
DLESLKAYKTRIIINASKNENFTPLMTLFFKKNYDEKFLESADKDEIFGIKLYPAGITTNS
KGGVSSFDIENLKPTLEAMSDLQIPLLHVHGETNDFVMDRESNFAKIYENLAKNFPRLK
IVMEHITTQTLCELLKDYENLYATITLHHLIITLDDVIGGKMKPHLFCKPIAKHYKDK
EALCELAFGGYEKAMFGSDSAPHPKHEKECCGCAAGVFSASVALCVLADLFSKNSNEV
NLQKFISDNACKVHNLTFEKEKIIVLENQEWQVPNEYKNESEKVVPFMAGETLKRVR
"
gene      complement(51488..51862)
/locus_tag="DMACINML_01571"
CDS      complement(51488..51862)
/locus_tag="DMACINML_01571"
/inference="ab initio prediction:Prodigal:2.6"
/inference="similar to AA sequence:RefSeq:ADN90627.1"
/codon_start=1
/transl_table=11
/product="integral membrane protein"

```

```

/protein_id="Prokka:DMACINML_01571"
/translation="MDINTVLMMSIDKIPNSLPLVQDKLKNASEDKINSLAILPFKS
HIIGLILGLFLGAFGIDRFYKGDIGLVAKLITWLVGVVTIWIYIGGLILFALWIWCI
VDWFLVWKGIIKDNLNKILAVL"
gene      complement(52018..52728)
          /locus_tag="DMACINML_01572"
CDS       complement(52018..52728)
          /locus_tag="DMACINML_01572"
          /inference="ab initio prediction:Prodigal:2.6"
          /inference="similar to AA sequence:RefSeq:CAL34415.1"
          /codon_start=1
          /transl_table=11
          /product="putative SAM-dependent methyltransferase"
          /protein_id="Prokka:DMACINML_01572"
          /translation="MNLWDKKAKNYARYNQKLNSIQEQTFKELEKLNISFKNKSIIDI
GCGTGVWTLHLAQNAKEITALDNAKAMLEILKEDAKKLQLTNIKYENCTFTEWVSKNQ
NTQFDIAFLSMSPALQDKDYLNFIQLAKFRIYLGWADYRKSDFLDPIFKHFNTEFKG
VYKQDLESYLLENDIKFHKFVDETRIVERRKRDEAIENALWHLDMNGVKASKQDLEAF
VKDDITETIQSKIKLLVF"

```

ORIGIN

```

1 atggctttag agatttgacc aaattcatca ttagttttta catcaatagt agaaatatct
61 ttggttttat gtttgatgaa gccaaagaaa gaattaagtc ctgcttggat agaggcgagt
121 ggggagaaac ttctattgat taaaaatctt ataagaatta atgctattat gatagcaaca
181 attcctataa ttacttgttg atataaaatt tcatttgcag cattgggtata aactgaatth
241 tctgttactg tacaattctt aaatagagga ttataagtag cgttacacat aatagcataa
301 ttaacacctt tgtcattttc tacatggaat aatacatctc tattatttgg atctagataa
361 gagggattht gtttaattgc atttagctaca ttaatactta agtcagtht tgtaaaaatt
421 tgacttatat catctctaaa aagtatggth cttcttggat ctattacagc agtataagta
481 tgctgtgatt ttcctactgt tagaacatct gtggaaaatt tagccaaatc gtaatctcca
541 cctacaacac ctctaaaatt tccattthta tcataaaaag gagccgcata ggtaattcct
601 atthttccac tatctgcgga cttataaggt tctgttacga taaattgtht agctgctthg
661 gcttgcttat accaaggacg atthtttgta tcataaccct tggaaatatic taaaatttga
721 ttatttgatt gatagthttt tcctgtatct tcaaaaccta cataaactaa atcataacca
781 thtaaatctt taagagcttg gattaaattc ataagctcac gttcgtcat atcaggatth
841 tgatttaatt gatttgctaa atthtgaaca ccatthcttht ttgaagcacc gtaagcttca
901 aatatggcac caacatcatc catgththta agthgattth cththaaaag ctcataagtc
961 ttaaththtag cthcatagta gctaaccgtg cthgtaattg cthaaathaa tacaactaaa
1021 attcctatic aaagtgtaag tcttgthgat atgctaactg atthtagcaa tgtattthgtt
1081 tgcattatth tcttacctth atthataaaa tathththta ttatactgaa aaaththtga
1141 aaataagaaa gththcttht ttatagtaat tgagtgtaaa thtataaaca ththththt
1201 tgtataactt tgaattatta thtacaaggg gtattgtgat cattagtaaa gaaagtccta
1261 aaagactthc thtaagatag agthaaataa gcactthtg gagcactaaa agcactaaga
1321 gttggaagct tacctgtaaa ththctata thtacaagtc ctgtatgtgc tatattacca
1381 thtgcaagth ttgaactthg aatatctatg gthtaagacat thgcattthc gcattthgcaa
1441 agtccattht catcaggatc ataccaagca cctcgcata gctthacgac acctgcatg
1501 atatcatcac thacaattac acctgctaag acctctccgc gthtgthaaa gactcttaca
1561 acatcgccat ththtaatac aagthththc gcactthtg tathththaa aathgctct
1621 ctatctthta tcgcataagt thctcttaag cthgtgtggc aaagctgaga atgcaagcga
1681 tctththggg gththgtgag tagatgaaaa gthgctthct tagtagcatt tccaagccat
1741 tcaatcggtt cgaaccaagt aggatgcgct thacaatcat tataattgta atththgatt
1801 gthtgagaat aaaththcaat caagcctgat tctgtgccta aagcattaag gattggatct
1861 tctataaath ctgaaaaacg tgtccattct aagctthctg cagthgctthc aaagghaata
1921 gthtcattht tcgccccaaa thctthcaaaa ththggcatag gagtagcaaa agcctcgcca
1981 aagctthtag ththththta agcactatca thaatthctt tgatgaagtc ththgcttht

```

2041 ttaccctttt ctgtataagc attgtataca ttttgacat aaactttgca tatatcagca  
2101 aaaattatat aatcatcttt gctttcacc actggttcaa ctgcttgttt catcggtatt  
2161 atatgcatat tagaataatc cccgctcata gtaatcatat ctctttcata agatgaagtg  
2221 gtaggcatta caatatctgc ctttttgct gttggggtcc aataaatttc atttactact  
2281 acagtgcgag gttttcgcca tgcttttaca ttggtattgg tatcttgatg atgtacgagt  
2341 ggatttccac ctaccagta gataaatca atatcaggat aagtaatttt gctaccattg  
2401 tgatctatgg ttttgccagg attaagtaaa gcatctgcta ttcttgctac agggaaagag  
2461 taacttgagc cttttgaag ccattctgcg ccaccgcttg cttgatttga tttagccaaa  
2521 cttgaaatt taccattttt ccaaagccc aaacttcctg cattgattcc accaattact  
2581 ccactttgc aagttggcac acctccattg ctataatgat aactaagtcc aaaaccacca  
2641 ctttagtac cgatttgcc tatcatagaa gctaaagtta caagcatcca gtgtggctgc  
2701 tcaccataat gagctctttg catacccat ccgctcataa tcatagtagg attatcatag  
2761 aaaatttcag ctaaattttt aattgtcttt tcatcgatac cacaaatttt acttgcccat  
2821 ttgacatctt ttttgatacc atcttctttt ccatcaagat aatctttaaa tttatcaaaa  
2881 cctatagtat agttttctaa aaattcataa ttaactttat ttttggcaat caaatgactt  
2941 gccatacca tcattaaagc tacatcggta tttgggcgtg gcgctacca ttttgcatth  
3001 aaaaatttag ctgtatcagt tcttacagga tcaatacaaa taacttttat tttcttttcc  
3061 ttaagttttt caaataagc taagcctctt tgttctgatg cagtccaagc aatgcgtagg  
3121 gtagaaattg ggtcagcacc ccaataaca acatatttag aatgttctaa gatattttcc  
3181 cacgaggttt gttgtcata aacttcaatt gaaccaacca cataaggcat aataacctga  
3241 gaagcccctg tagaatagtc tccagtagca ccaacaaaac cacctgtaac atttaaaaac  
3301 ctatgcaata atattctagc attttgcata ttgccacttg atttccaacc ataacttcca  
3361 ccaaaaatag cacttggtcc cttagcttct cttgtttttt tgagtctttt tgcgatgagt  
3421 tttacagctt catcatagct tacacgcaca aattcatctt ttccgcgaag ttcaggttta  
3481 ggattgtcag gattttgaag ataggatttg cgtacataag gatattttat acgagattta  
3541 taaaccatat ctgcagtgta atgttgtaaa gggttgtcca tcttggtgat ttttcccaa  
3601 ggttcacttt taacgatttt accatctttt atggtaagtt ttaaaatccc ccaatgagcc  
3661 gctgtgatga cttcaccatt tttgacaagt ccaagactta cttttgtagc ttctacactt  
3721 tttcctgctc ctaaagttgg aataaggggt aaagactta atgctgcacc aattttttaa  
3781 aattttcttc tatctaacaat tgcccttctt ttttattttg ctttaaaatc ttttgcatth  
3841 ttttgtaaatt attgtattac tagccatcta tcttttttat caattcctgt tctatctgcc  
3901 atagagcgaa aaacagcagg ccaagcatta gcagtaaatt ctttttcagg atgtaaagca  
3961 tggcaaattc cgcaattttc agcaaaaaga ttttttgctg gatttaacat ttctttattg  
4021 tctttggcaa aatctttttt atctgcccaa atttcaaggc tcaccttatc ccatthacca  
4081 ttttttctg cacttatttg tgagaaattg agttttgtat ttttggaaaa agcagcaaca  
4141 atgattcttt gagaatcgtt aaaataaatt acagaaggag ctttaggatt tacatatcca  
4201 tcaactttta tcaaaacctt atctccatca ctttttataa tttcaaaagc atttgtgggc  
4261 aaaagccttc ctgtaacttt agtatcgtct ttatgaagat aaagtgtatc aacttcatct  
4321 gtataggcta tttcttttagc ccataaacat gtcgccaaga caaaaaaga aatgaaaatt  
4381 ttcatgttca atccttgata ataattataa tagtattatt ttattattaa aattattaat  
4441 tattcattaa taagatattt tttattttat atataaatat ttaatagttc tatattattc  
4501 cttatgattt caaattgata gggctgagat tttattatca ataaaaatta aatgtatttt  
4561 aaaaattaaa ttgtttattt ataataaatt catatttttt taaaaaatat ttcttatgat  
4621 tgacataagt ttttgagttt ttccaatcac ttatgtgagt gatttttata gatatttaat  
4681 ttttgaagtg atactatttt tgcaaagttc aatgaaattc aaaaagagaa ataaaatag  
4741 attacaattt ttatcttatt agccttagct ttaacattgc tttcgtttaa aaaaacaaaa  
4801 ttatctttta tggatttggc gataagtggg attttggctt attattataa tatcatagaa  
4861 ataagtttta ttgcttttat ggggtgtatt tttttattgt ccttgattata taaaaataat  
4921 aaaaatatat ttttagagct tttgatagtg gcattttgtt tgcttttatt tttgcatttt  
4981 attccaggtg ttaataatgt aaaaattcta gataaagttc atgcaagtga gcatagcagc  
5041 gcttttactt tgtatttttag ttttgataag cttttgggtg ttttttactt ctttttactt  
5101 atgccaagtt tgtttgagaa ttttaataga ataaaaccaa aattatttca agcagtggtt  
5161 ttgtttgcaa gtcctttttt acttttatcc atcccttggt atttgggtgt aattaaaatg  
5221 gaaataggct ttccttcttg gatagtgtat tttttatttt ctaattttat tttggttgc

5281 ttggttgaag aagcattttt taggggatat ttacaacaaa gattgcaagg tttgataggg  
5341 ggtgtaggag cgcttttggg tgcgagtttg gcatttggag tagcgcatta taaagcgggt  
5401 attttgatga taatctttgc ttctttggca ggtttgattt atggaatggc ttggagatat  
5461 agtaagagtt tgtggccttag tgtatttttt cattatggtt taaatttaac acatttattt  
5521 ttctttactt atccctctta tgtaaaatag agattattta ataaaaaat ctccatcaaa  
5581 gctaattaa gaatatcttc tttcatctcc tatgctttga gtttaattctt cgatacttaa  
5641 aaagctaagc gaatctgctt ctacatattc gcgcacttct tctaaatttt tattagcact  
5701 aatgagttct tcaaaggttg gagtatcaat cccataagta tctggaaatt taatttcagg  
5761 gcaagctatg gccaaagtga ttttacttgc acctgcagca cgaagtaggg aaatgatttt  
5821 tttagaagtt gttccacgca ctaaactatc atctattacg acaatttctt tatcttttag  
5881 aactttatgc ataggattta attttaattt gactttttaa tttctaagct cttgagtagg  
5941 ttcgataaag gttctaccta cataatgggt tctaactata gccatttcaa gtggaatttt  
6001 taaatattgt gaaaagccta tggcagcact tacgccacta tctggaacag gcactacaaa  
6061 atcagcacta tgagtaaatt tctttgcaa agcttcgccc atttttttgc gtatctcata  
6121 cacgcttttt ctttctataa tgctatcagg tctagcaaaa taaatatatt cgaaagcgca  
6181 aattctaggc tcttgtttaa aaagttctat actttcaaat ttatcatttc cttgagttaa  
6241 aataatcatt tctccagggt taacatcgcg tataaattct gcttctataa gatcaaaagc  
6301 gcaagtttctg cttgctacga tatagcctcc atctttttaa cgccctaaag ataaaggacg  
6361 caccataa ggatccctta caacataaag tttatcttta cttgctaaaa caaaacaata  
6421 agcccctata cattcttgca agctttcaat aaatctatct ttttaagcttt cttttttact  
6481 tcttgctatg agatgaacga cattttcagt atccatattg gtttgaaaga tagctccatc  
6541 ttcgataagt cttgatctta ctttttcttt gttgactaaa tttccattgt gtgctaaagc  
6601 aatatctcct aaaactgaag tcgcagctac gggttgagca tcatttaagc ttgaatttcc  
6661 cgcggtagaa tagcgattgt gtcctatggc gatttcgccc tctaaggttt ttagattatc  
6721 aggattaaaa atttgattca cttcaccttt ggctttgata gttttgatag ttttaccatt  
6781 gcttacgcta atgccacttg cctcttgctc tcgggtgttg atggcaaaaa gagcatagta  
6841 agcataagta cttgcatttt ttgaatttat aactcctact actgcacaca ttttaattc  
6901 ctaaaaaatc attaatggag tacatttttg gctcttgctc attcagccaa atagcgattt  
6961 taatcgctcc tttagcaaaa gttgctcttg aggttgctcagt atggtttaat tcaaaaaatt  
7021 caccctcttc ataaaagccc acagtatggc gtcctacgat atcgccacct cttagactca  
7081 tcacagcaat ttcatccttg cttctttcgc ctatgatgcc atctcttcg cttattctta  
7141 ctttttcaag atccaaattt cttagctttt ctacaccttg tgctaaagtc atagcagtg  
7201 cacttgagc gtcttttttg tggcagtggt gcatttctaa aatttctata tcaaaatttc  
7261 ttaacatttg gcttgctttg cttagcaagat ggtttaaaac cgcaactcct aaagacatat  
7321 tagtcgcata aaaaacaggc attacctcac ttgcattttg cattaatgt agagtttttt  
7381 catctagtcc tgttgtgcca attactagag gttttggcat tgttcttgcg taatttaaga  
7441 gttcgtgagt accatttggg gatgagaagt caatgataac atcgcttttt tcaaaaaatt  
7501 cttctaaatt atcgccctta tcaaaaagtg cagctgcttt tgctttattt tcaactctta  
7561 aacattcttc aatctgtttg cccatgcgcc ctttagcgcc ataaattcct atgtttatca  
7621 ttgtcttatt ttttccttaa aaataaaatt gcattttaa atttattttg taaatttttt  
7681 ataagaaatc aggacttgat gttttttaat ttgtttaaat tttcaagcaa tctcgcttct  
7741 tctcctatgc cttgctttc gtagaatttt aaatttgcgc taagatagtt ttgttttacc  
7801 catccaccaa aatgatgcgg ataaaaggtag tttttctttt cggggtgatt attgtttaaa  
7861 taattagga tctcaagcgc gggattgttt tttacatagt ctaaagccct gtttatagcg  
7921 ttatagcttg aatttgattt tggagcgctt gctagataaa caacgcattg agaaagtata  
7981 atccttgctt caggatagcc gatatttttt actgcagtaa gtagtagaac ggctaaattt  
8041 aaagcattgg gatcggcatt agatatactc tcgcttgcaa agataatcaa acgcctagcg  
8101 ataaaatcag cactttcccc tgcatcgcac aaacgagcaa gataatatat agcagcgtcc  
8161 acatcgcttc ctgcgaaact ttaataaga gcgcttgcta aatataatg agtatctttt  
8221 gagcttactc cctcgctatt taccctattg cgaagttttt ttaaattttc taaagtgatt  
8281 tctttttcat ttaaaacca agcaaatca agtaaattta gcatggctct agtatcagag  
8341 ctttttagta aaaattcttt agcattatct tctattgtaa atgctatttc ttgttgact  
8401 cgttttaata aaagttctaa atctttttgc ccaagatttt taaattcaaa aagcatagaa  
8461 cgacttctaa tacctgaact taaaacaaa taaggatttt cagtgcttgc acctataata

8521 atacaacgat aatthttccat gggaattaaa agcattttctt gctggggtttt gcttaaacga  
8581 tgaatthtcat cgataaaaaat aagagggttta taaagactat ttttataatt ttctatgatc  
8641 tttcttaaat cttcaagttt gaaatthtccg ccatcaaatt cataaaaaatc aagtcctaaag  
8701 tccttagcta caactctagc aaagggttggt tttccacatc ctgcaggtcc aaaaaataag  
8761 ctatgaggaa gtttttgcat actgataaac tttttaaata cttctacgag ctctttttga  
8821 cctagaattht catctaagggt tttggggcga aaatthtaag ctaaactcat cagttthaaat  
8881 ttatatccgt aaatthcattg ccatttgattt taagtcgagt ttttagcatca ctatcataat  
8941 gaagatccat gataaacata ccctcttcat tctttataaa gtatttgattt aagcctccaa  
9001 aaaatthgtcc ccaagtaaag atthtcatcgg gcgattthta actagaaatt tgaatatgag  
9061 ctttatgact ttgcattgat aaaaagatat ttccttcgat gtttatatct tgattatctt  
9121 tttthaaagt gatatthtgt atthtgcaagt ttaattcttc attggaagggt ttaaaaatca  
9181 atthtatcatc agaaatatca ggthttttttt gactataaat gagatcaaaa tgaatthtgat  
9241 caaaatcaat actthtgataa atthtgagaag ttaaatctat acttagatta tttgctttgct  
9301 cttgagaatg cattthtcaag gtttgattat catcatcaaa ataaatgata tttttattat  
9361 aaaatgaaga gattgtatga ttattgattt cgcaaaaatc aaatthtaac tcttctacac  
9421 tttcgthtaaa ttgtatthaaa ttagaaaacg atataagggtt tccaatthtt tgthtgatggt  
9481 ctaggthtttt tagatagaat tthtgataaa atthgagaaaa atcaactthga cctatthtttg  
9541 aataaatagc thtaatthttt aaatctthtat ctagthaaaat ttcagthtaaa acatthttccc  
9601 ataatgcatt tccgccttca ttgctthaaat taatatcttg aaatthgaatt gatacattaa  
9661 tatcattthtg aatagattgt atctthaaacc aagctaatthc tttattgtgct aatthtatcgt  
9721 ctaagagthtt aaaaggattg ctgagthtttc ctthgtgctat aaatthtgaa aaataattat  
9781 thgtthaaattht aaaaatcaagc tthtgaaacta aaccthaattht atactthtatct tctatggtaa  
9841 aatcagcctt thgaatthtaaa aaactthttat ggaaatthtac atthttttatc tctgtaatagg  
9901 gattthtthgtgt ttgagthaaaga thtaaaaaaa aactthtcatt aatatthgtccc atgthaaaaaa  
9961 tthgtataat aaagcaaaag aatacghataa taggaattht aagthagthttt thcaatcttht  
10021 tthctthtaaa thaatthtaag tactatthttt caaatthcctt gcthaaaaaaa gththaaattht  
10081 thgaagaaattht aagctthgctt acthaaaaagt aagcaaattht ataagccttht thgtagcatt  
10141 ctatthtcaat thctctthgct acaggaatthg caggcgtthg agthaggatta gatgtatathc  
10201 caggatagtht aagthttthact tcaagaaaat ctctacttht taggtcttht aatthttccat  
10261 gthttatctat ccchaaaaattht ccacattht ccatatcaat thcagthattt ggcagthattc  
10321 thacagccat thgtccacca thagatthgaat ctataagtht agthttthatta thtatcataaa  
10381 cctctgctat agthacctthga agthttthacac tatctgcaag aagcatagaa cctgthtagaa  
10441 gthgctgathc gathtagaata cctthttthtca tthttatctcc tthttthaaaa agthgatgaca  
10501 thtaaaaaattht thtaagthgaa gthgagthgtht aatthggataa aatataattht thtagatatht  
10561 thgattthgagtht ththhaaaaaa thtcaataaa tthttthaattht aaataagthg aatathcttht  
10621 ataatthgtthgt agthtcaattht thcaaaaggaa thattaatthgt aaaaaatata thgtthgttht  
10681 thgattthtatc tthttthattg atthgcgtgtht gcagthgaaaa aaataaaaaat thcaagcagtht  
10741 thaatthcgtgthc acaatthctaa ggactthctaa aaaaatcatga agcagthtttht gthcgaattht  
10801 aagaagcaat thgtthgatttht gatgaaatga gthattgathc aaaaatcaat thcthaaaattht  
10861 caaaaatthct actthacaaaa gcatcagatht ctgathtttht atthgaththt actthattthg  
10921 aggcctaatca aaatthataaa atagaaattht thtataaaaa thattcctattht gthttthagaat  
10981 thcaaacagg atggatagaa aatthttacct ataaggctha atthgagcaaa gatgaagaaa  
11041 aagctthatttht gcattthaaat thatagcttht gaaacacttht thaatthggcaaa ththaaagata  
11101 aaacacaaga gggctthaaaa atcactthttag atthggcaaaaga atthggccttht aactthgggtg  
11161 aatthtagthct thgathactgatht gatathcaagc tthttagataa gcctcaagaa cthgtthtttht  
11221 cthtatgathga aaaaatcatg ggtthttthaaag aagcthaaagtht actthcaattht caaatthcctha  
11281 gthaaagcaaa agathaatgatht thttagactca thtagcgcaga agaaaaagatht caaatthgctha  
11341 cththaaaaattht thcthaagaa ctgathctgaaa atcaagcttht thcaagatthtt atthcaaattht  
11401 caccgagct thaatthtthaga gcatggagcgt thgggaaaaaga actthhaaattht thcagcthaattht  
11461 thgagccagg ggaagatht caagthtaaaa thcgcaaaagg ththhaaattht aatthcaaggttht  
11521 thaatcaataa aggcgaagaa gcaaatatht cthttcaaaaa ggcactthtagac ccaagthctthg  
11581 tthttthgcaaa thgathgggtgtht tthttthacctha gthggggcaga atathcaagtht thattathaaat  
11641 cacgcaatgtht thaaaaagatht cattthhaaaag thgathcaaat tthttthcaaat aatathaaagcgt  
11701 agthattthgctg thtaaaaaat thggthgggtgtht aaaaagathgtht thagthacgcaaa gaagcgtthtt



11761 attcttcaga tggctttaat tatgttgcta aaaaagtcac cgataaaaa atagaactta  
11821 aaaatcaaaa aaatacttgg ataagtagcg ctttagattt aagtgattta aaaggtaaaa  
11881 gtggaatfff ttcaagttagt ttaagtgttg atgctaacga tcttgattat aagggtgaaa  
11941 atgtatatcg tattataaat aaagctagtg tcagtaaaaa tctcattfff tctaataatcg  
12001 cttaagtgc gcaaaatffa aataaacagc ttgtagtcca tgcaagagac tttagcaaaa  
12061 atgaagctff ggaaaatgta aaaatagagc ttgtaagtaa gcaaaatcaa attttacaaa  
12121 gccaaaatac tgattctaata ggagatgcga aatttcaaat tcaagaagat gatgaaatac  
12181 tctatattct agcaagtaaa gagaatcaaa tcagtgtfff aagatttagt aatcctffat  
12241 ccacagatgg ttatgatgta gagggggatc aaaatcatga gatgataaag gcattffatf  
12301 acacagatcg tggagttfat agagcgggag atagtgtaca tffaagtgtg gttgcaagag  
12361 aaaatacaaa tccactcaaa caccctataa attttactff aatcaatcct aaaaatcaaa  
12421 aaatcataga aaatcgaatt ttaaaaagtc aaaatgatat ttactatacg caaattaatt  
12481 tagataaaaa tgccatcaat ggcctffata gggcgaatff taatatcgct ggggtggaat  
12541 ttagtaaaaga cattfftagtc caaagtgtgg tgccaaatcg tatcaaggta gaattaaatg  
12601 ctgatgaaaa tagaagttfa gatgatggga gttfaaacta cgagctffct tcaaaatc  
12661 tttcggggc tttagcttca aattfaaaat atcaaagtg tgtatattff tctcaaaaa  
12721 attatcataa ttctaaatat aaagattata ttttactaa tccaagttca ttgattatca  
12781 gcgcaagtgc tgacgataaa ggaaatffgg atgaaaagg taggggtgcaa tcaagtgtg  
12841 aaattcctga aaatattffa aattctcaag gctataatff taatgcaagg attgttfcag  
12901 aagttffga aaaaggtggc agatctgtaa aagctgttaa ggatgtaaat ttaaatcgtt  
12961 atgattattf ttaggaatg aaagctffgg caaattctta tgtatctgag ggagaaacga  
13021 ttgattfffa tgctattgta agcgaattga aagaaaaatt agtttcaggc aagactffag  
13081 agtatagaat ttatcaaaat gattattatt ggtggtggga ttatgattct tatgatgagt  
13141 tttgcgctc tatcaaaaca gataccaata ccaaactcat tgaaaaagg gagcttacta  
13201 gctctagtga gcctatgaaa tttagctffa ataccagtaa ttattatggg caaatgtffa  
13261 ttgagctfat agataaagaa agtgaggtaa gtacagggca aagttfffat gtaagctctt  
13321 ggggagagcc aagctatgct gatgtagtga gttctffaaa aattfaaagt gataaaaata  
13381 aatataaaat agggcaaagt gcaaaaatag aatttgaaag cgttgcagga gctaaagcac  
13441 ttataactff aagttctaata tctaagatta ttgatcgff tgtgatggat actcaagatg  
13501 aaagcacgag tatagaattg gcgatgaaaa aagaatacgc accaaatatt tatgtaagtg  
13561 tgagttfatf tcaagattat aataaaattg ataatgatcg tgctctaaga cttfftggtg  
13621 taattcctff gtatgtagaa gatgaaaata caaagcttga tttagaatta aaaactcctg  
13681 ataaaatff acctaatagt gattffgaga tagaaattca aagtaaagat aaaagagctt  
13741 ttaattatac cgtggctatt gtagatgaag gactcttga tffaacggat tffaaacac  
13801 ctgatattff gaaagttff tatgcaaaaa caggtfftac tffaaaaact tatgatactt  
13861 atagtcaaat tatccctaaa tttactggag gtgatagtg tttagggggg ttaagagtag  
13921 ataaaaatcg cgatgatagt gcacagcgtt ttaagcctgt agcgtffft aatactcctg  
13981 caagaagtga tgaaacaggt tttgcaaaac tfaaattfaa aatgcctct tatatgggtt  
14041 cgttcgcgt gatggttga gctaatgaaa atgacgctta tggcagcgtt tctaaggata  
14101 tacaagtaag cgcacctct gtgatgctg aaactffgca aaggactffa aaaataggtg  
14161 ataattcac cttfftaact caaattffa aaacagaaaa tcgtattaaa aatgcaactt  
14221 tgagtgtaag aagtaaaat tctcttataa aaatcagtc agataactca accatagact  
14281 tfaaaagtgc tactaattfa gaagtgatga tggatgcaaa tgtaagtgat aataggattg  
14341 gcaaagagct tttagaatff gaattfaaaa gtgaagatta tacttataaa aatgaaatcg  
14401 aaattgatat caagcctatt aatgcttata catatgaaaa taatactagt ttgattaaag  
14461 caggggaaag taaagaatff attataaaag attatattff agggactaca aatgcaactt  
14521 taaagctff gcctacacct atfftagata tggataaaag aattaaagtat ttattfaatt  
14581 atccttatgg ctgtatagaa caaactacct cagcagttff gccacaactt tffftagata  
14641 aatttagcac ggaattgac aagcaaaaag cgatcaataa tatcaatgca gccattgagc  
14701 gttatagtaa tffcaaac gctgatggag gatttgctta ttggcaagga ggagatgaaa  
14761 gcaatgcctg gggaagtaat tatgcgggaa tgtffftgat tttagcgaag caaaatgggt  
14821 atffftgctc tgattctatg tatgaaagat gttfaaata tgagcaaaat tffftcaaa  
14881 aaagtgtata tcgcgattat atgatggata tfaaagcaaa ttcattatc tffftggcta  
14941 tggcaaaaa acctaatac agcgaatga atffactcta tgataactfa aacagttfa

15001 gcaccgaagc caagtggcaa ttggccgcag catataaact tgcaggcggtt gaagatactg  
15061 caaaacagat tgcaagtaag atttccatag agcctgattc taaatattct ttctatactt  
15121 atggttcttt ggtaagagat gaggctatta ttgcaaatgc ttataaacia atttatggca  
15181 ccaataatga agaattactt caaaaaatca gcgatacttt actctcaaaa gattatztat  
15241 ccacacaaaag tacaggctat gctttatatg ctttagccat ggggtgcaaat ttggaaaata  
15301 tgaatgaaaa ttttatggac gcaactttaa aaatagacga tcaagcctat accatcaatc  
15361 aaaaccaaat gcaaattttt tcttttaatg atgaaaaagc cattgtaagt gccaataaag  
15421 atatatttgt aagttttgga gtagaagggtg taaaagcgag tgaaaactca gcttttagta  
15481 ataaaatcag tttagatcgt gctttttatg atgaaaaagg caataaaatc agtcctagtg  
15541 agattgggtc tgggtcaaacc ttttatatga gaatttcagt gagcttaaat gagggtgcaa  
15601 attatgtttc caatatcgct ttaacacaaa ttttaccaag cggttgggaa gtgagcaata  
15661 cacttttaga tgataatact ccaagtttta ttaaaaattc aaattatgat tttattgatg  
15721 ttagagatga taaaatcatg tggttttttg gtttaataa aaatcgaca catcattttt  
15781 atataaaact taatgccata actccaggaa gttatacttt aagtgggtgct tatgcagaag  
15841 cgatgtatga tgatacttat agaaccttaa gtgaaagtga aaaagtagtt gtaaacgct  
15901 aaataaaaaa tgaaaaatgc tttaaaaatt tttagctttt tgctactttt ttttcttgct  
15961 tatgtttttt atgtatattt ttcttttgat aaaaatacct tgctagatga ttttaaaagc  
16021 cgttatagta agattttata cgataaaaaat ggcgaaattt taagtgtttt tttaatgat  
16081 gaagagcaat ggcatattaa aagcactgat attcctaagc gtttaaaaat cgctgtgatt  
16141 aattatgaag ataggaaatt ttattcacat tttggagttag attttttagc tttaatgagg  
16201 gcttttgtaa ataattttta ttctactcaa agaagtgggtg caagtactat tagtatgcaa  
16261 acgattaagc tttgggataa aaaagataga acttatttta ataaattcaa tgaaatcata  
16321 caaagttttg ctttagaaaa tgccttttagc aaggacgaga ttttaaaact ttatttaagc  
16381 aatgctcctt atgggtgggaa ttttagtaggt tatgaggctg ctattttgtt ttattttgat  
16441 aaaaatcca aagatttaac ttgggctcaa gccgctttgc tcgcaatttt acctaatcaa  
16501 ccagggttta ttaatttaga aaaaaataaa acaaaacttt taaataaacg caataaactt  
16561 ttagcaaacg tttatgaaag aaagttaatc aataaagata tttatgaaact ttccttaaaa  
16621 gaacctttgc caaattttta gcctcgtaaa aatatcgcac cccatcttgc ttttaagactt  
16681 ttaaattgatg ataataaaga aattttttca agtatagaca aaaaaattca acttaaaatc  
16741 gaaaaaaagg ctaaagaatt ttcttatact ttgcaacaaa aaggcataca aaatttagcc  
16801 attatttttag ccgatactaa aacacgtaaa gtttttagctt atgtgggttc tcaagatttt  
16861 tatgatattg caaatttagg acaaattaac ggaaataccg ccaaagcag tgtgggttct  
16921 actttaaac cttttttata tgctttaagt attgatgaag gtattatcgc accggagtca  
16981 attttacttg atgttccaac ctttttttct aatttcaatc ctcaaaatgc aaataaaaaa  
17041 tattatggaa taatcagtgc aagagaagct ttacagagat ctttaaatgt tccttttgta  
17101 tcgcttttgc aagattatgg ttatgaaaaa tttttttata aattaaagac ttttttaaat  
17161 tttgaagatg agaattacaa gcgatatggg ctttcgctta ttttaggaac taaagaattg  
17221 agtcttgagg atctagtaaa actttattttg ggttttagcaa attatggaga acttgccaat  
17281 ctttctttta taagagatga aaatctaagc ggagtagtaa gaatgttttc taaaggcagc  
17341 gcgtatttaa ctttagaagc aatgaaagaa cttcaaagag tgggtttgga aaattataat  
17401 aaagaaaaaa ttatttcttg gaagacgggc acaagttatg gtagaaaaga tgcttgggct  
17461 ataggtgcaa ctccaaaata taccttagga gtttgggtgg gaaatttcaa cgggtgaagca  
17521 aatgcaaat tatatgggtg gagtatagca ggagatttgc tttttgaaat ttttaggactt  
17581 ttagatgagg tggatttgga atttgcacct tctgatgatt tgatgacaat caagttgat  
17641 agtattagca agtatagata tgatgagaat ttaaatacaa gttatattca tactttatat  
17701 cctaaagagg caaatatttt aagaacttct ctttttttga aaaaagttta tgagtatcaa  
17761 ggtaaggagc ttgattctaa ggatattcat tttaaagatg caaaagcatt tataaagctt  
17821 gatttacctg cctatgcact ccattttttt cagcaaagga attttaaat tccaagtaaa  
17881 aagggtgtta atatcatcta tcctaaagat aatttaaac ttatttttagc cagagattta  
17941 aatggaatga aaggtcttgt agcaaaaagta gctaatttaa ataatgagaa gcttttttgg  
18001 tatttaaatc aaaagcttat ttatgaggga aatgaaaata cacaaaattt aaatttaaaa  
18061 gaaggtaaat atcaactttt tattatttct caaagtgggtg aacaagatac agtttgggtt  
18121 gagattaaat aattctttta taaattttta aaatttataa aaatataaga ctttttttgt  
18181 attatttttt gaaaatttat catcatagag aatttatgat gaaatgattg gagagaatat

18241 gcaaaaaaca cactctttgc ccgaactcac cttacgtggt ttacttttgg gaagcatttt  
18301 aactgtgatt tttacagctt caaatgtgta tttaggactt aaagtaggac ttactttttc  
18361 atcttctatt cctgcagctg ttatttctat ggcggttttg gcttttttta aaacttctaa  
18421 ttttttagaa aataatatgg ttcaaaactca agcttcagca gcgggaacac tctcgtcggg  
18481 ttttttgta atcccaggac tttttatgtg tggatattgg agtgaatttc ctttatggca  
18541 aacttttatg gtttgtctat gtggtggtgg gcttggagt ctttttacta tacctttaag  
18601 aagagctatg gtggttgaaa gcaagcttgc ttatcctgaa ggtagggcag cagctgaaat  
18661 tttaaaagtg actaataaag atcaaagcga taaaaaaggc aagcaaggca taaaagaaat  
18721 agctttgggt tcttttatag ctgctttttt tagtttgta agcaatggtt ttaaacttgc  
18781 tgcgagtgaag agcagtttgg cttttatttg gaataaaatg gcctttgggt tttcagcagg  
18841 atactcttta gcacttttag gagcaggata tttagtaggt ttagcagggt ctatagcact  
18901 ttttgtaggg atgttttttag catggggagt ttttaccct tatctttcaa gttttgaatt  
18961 tgatggtgtg aaaaatgcta gtgaacttgc ttctagtgtt tgggcagcta aggttagact  
19021 tattggtact ggagcaattg ctatagcagc actttggact ttaatagagc ttttaaaacc  
19081 cgtgataagt ggaattaaag aaattattaa aaatgttaca atttctaata caaaaagcca  
19141 agaaagcacc gatcaagatc tttctttaa aagtattttt atacttttta taatcctaac  
19201 tataggactt tttattactt tttatagttt tgtatcggat gcaaatttaa atagttatta  
19261 tcaaatttta tttgcctttg ttggaacttt tattgctgtg ttgataggat tttttgtagc  
19321 agcagcttgt ggctatatgg caggacttgt gggttcttca tcttctccta tttcaggaat  
19381 tgggcttatt gggattatca tttcatcttt ggttatttta cttttgggtg caaatttatt  
19441 tgatgatcct atgctttcta aatttgctat cgccttggct atttttacta caagcgtaat  
19501 tntagcaacc gctgctattt caaacgataa tttgcaagat ttaaaaacag gctatttagt  
19561 ggggtctacc cttggaaac agcaagttgc tttactcata ggttgtgttt ttggagcttt  
19621 agctatagtt cctgttttaa atttacttta tcaagcttat ggttttgttg gggctatgcc  
19681 aagagagggg atggatgttt catctgcgct tgcagctcct caagcaaatt taatgagtac  
19741 tatagcacia ggaattttta atcataatat agagtggagt tatataacat ttggagtagt  
19801 tataggtata tttatcatta ttatagataa gatactaaga aaaaatggca atttatcctt  
19861 gccacctttg gctgtgggca ttggtattta tttgccacca tctgtaaata tccctttggg  
19921 aatcggtgga attttaaaat attttgtgat gagatattta gcaaaaaaat atgaaaataa  
19981 ttctcaciaa agtgaaaaaa taactactca tgaacaaaaa gggattttat ttgcctcagg  
20041 acttatcgta ggagagagta tttttggcgt tattatagcc gcgattactg ttttttctgt  
20101 tagcatgggc ggaagtgaag gtcctttgaa attaagcttt ttaaataac ataataatga  
20161 attattaggt ttggtatttt tcataggagt agtactttat tttataaagc gcattgttaa  
20221 aactcgttag aatttagagt atttaaaaga aggattttta atttttata aaattcttct  
20281 tggtttattt tttatatctt gattaagggt agaaaatttc gttgatttat aataaattat  
20341 acttgcattc ttatcaaact cagcaaaaga agaaatgaaa ttaagacaa atcagcttat  
20401 atatatgaat agtttatttt catcatctgt ttttaagaaat tgcttttgta tttttgtcgt  
20461 gtttaaaaaa agttttaga attctttttt tattttaagg aaaattatgg ataatttaca  
20521 tgctttaata cttggaatca ttgaaggttt gactgaattt ttaccgttt cttctacagg  
20581 acatatgatt ttagggacaa ctgtttttagg tattgatatt aatgaatttt ggaaaagttt  
20641 tttaatcatt atacaactag gatcgatttt agcagtgcct tttgtgtttt ggcgtaaact  
20701 ttttaaaggg cttgatattt ggtttaagct tgcagttggc ttttttcca caggactcat  
20761 aggacttgtg ctttataagt acttaaaaga actttttaat ggctatgtgg tggttgcgat  
20821 gcttattttg ggtggtattg tttttattgt tatcgaatta gctcataaaa ataaagaata  
20881 caaaaccaat tctttagaaa agataagttt cttacaagct ttttttatag gtattatcca  
20941 atctctagca atgattccgg gtacttcaag gagtggggca agtattatag gtggactttt  
21001 gttagggctt aaccgtaaaa cagcagctga atttagcttt ttgcttgcta tacctaccat  
21061 gatagttgca actgcttata atatttataa agaacctgaa cttcttagca atgctaatagc  
21121 tttaatccct ttaagtatag gttttatcac agcttttgtg gtagcggttt ttgtgattaa  
21181 attcttttta aaatttattt caaaatttga ttttattcct tttggaattt ataggatagt  
21241 attgggaatt ttatttttct atttgtatta tagcgggtatt ttaaagtctg gaagtgagtt  
21301 taagttataa acaaagatta aattattcta agattttttt aaaaataagc tgaatttcaa  
21361 aaaaaattaa gtcttagaaa gctaaaatta gaactttaca aacactcaca gggtcagtga  
21421 gcaaaaaagg ttaaaaattt atggaaaaag aagttattgc atacttagat gatgaaaaaa

21481 tagttgattc tcaaagtaag aattctagcg atttaaaaga aatttatttt gataattcta  
21541 aacaaagttt agaggtgata cgccattctt gtgcacactt aatggcacia gcaatcaaaa  
21601 gtttatatcc tgaagcaaaa tttttttagt gtcctgtgat agaggatggt ttttattatg  
21661 attttcgtgt gaattctaaa atcggcgaag aggatttagt aaaaattgaa aaaaagatga  
21721 aagaattcgc cgaggccaaa caagaaatcg aaaaatacga aatcacaaaa agtgaagcga  
21781 tcgctaaatt taaagatgat gatttaaac aagaagtttt actccgcatt cctgatggaa  
21841 aagtaagtat ttataaacia ggagaatttg aagatctttg tcgtggctct catgtaccta  
21901 ataccaaatt tttacgtaat tttgcactta cacgcgtcgc aggagcttat cttggtggtg  
21961 atgaaaaaag agaaatgctt acgcgtatct atggtactgc ttttgcggat aaagagagtt  
22021 taaaagagca ttttaaggatt atagaagagg ccaaaaaacg cgatcataga aaattaggaa  
22081 ccgagcttaa actttttact tttgatgatg agataggagg cgggcttcct atttggttaa  
22141 gcaatggtgc aagacttaga tcaaaactag agcaaatgct ttataaaatt catcgtttgc  
22201 gtgggttatga gcctgtgcgt gggcctgagc ttttaaaagc agatgcgtgg aagattagcg  
22261 gacattacgc aaattataaa gaaaatatgt attttacgca aattgatgag caagaatacg  
22321 gtataaaacc gatgaattgt gtagggcata ttaaaatcta tcaaagcgat gtaagaagtt  
22381 atcgtgattt gcctttgaaa ttttttgaat acggcgtagt gcatagacat gaaaaaagcg  
22441 gtgttttaca tggacttttt agagtaagag aatttactca agatgatgca catatctttt  
22501 gtatgccaag ccaaatcaaa gagcaagtgc ttgaaatttt agcctttggt gataatttga  
22561 tgaattattt tgacttttagt tatgagatgg aaatttcaac caaacctgct aaagctatag  
22621 gcgatgatga aatttgggat acagctacta aagccttaaa agaagcttta gatgagcaag  
22681 gtttaaaata cggcattgat gaaggcgggt gtgcttttta tggaccaaaa attgatatta  
22741 aatcactga tgccttaaaa agaaaatggc agtgtggtac catacaagta gattttaatc  
22801 ttcctgaacg cttaagcta gaatacacag atagtaacia tgagaaaaag caacctgtaa  
22861 tgcttcatcg tgcgattttg ggttcttttg aaagatttat aggaatttta accgagcatt  
22921 gtgcagggga attcccattt ttcacgcac caactgcagt aggtatagtg ccgatttctg  
22981 atttctatgc tgcttatgcg aaggaaattc aaagagcctt gctagaatta aatcagata  
23041 gcgaagtata tgagaaaaat gagagtttaa gtaagaaat tcgtactgct gaaaaacaaa  
23101 aattgcctat gattttagtt ttaggcgatg aagaggtggc aaagcgaagc gttgctttaa  
23161 gagatagaag agctaaggag caaaaaaatc ttagcttgga agaatttatc aacttagtta  
23221 aggagaaaat gaggtaggta ctttttgag taaagaaaaa gaagtattgc tcaacgaaga  
23281 aattagagcg gacgaaatca gatgtatagg tgatgatggc aaggcatatg gcattatcag  
23341 cagtgatgaa gctttggaga ttgcaaatcg tttaggactt gatcttgtaa tgatagctgc  
23401 agatgcaaag ccacctgttt gtaagattat ggattatgga aaattccggt atcagcaaga  
23461 gaaaaaacia aaagaagcga agaaaaaaca aaaagtgatc gatataaaag agatcaagct  
23521 ttctgtgaaa atcgcctaaa atgatataaa ttacaaagta aaacatgctt tagaattttt  
23581 agaacaaggt aagcatgtga gatttcgtgt gttcttaaaa gggcgtgaaa tggcgactcc  
23641 tgaagcaggc gtagctctgc ttgaaaaaat ttgggccatg atagaaaatg atgctaactc  
23701 tgataaagag ccaaattttg aaggacgcta tgttaatatg cttgtaactc caaaaaaagc  
23761 ttaatctgtt tttgcagata ggcttttaaa ggtgtaaaaa gtttgaaaga aaatccctct  
23821 ttttaaaaag aacaaatcat tacttatttg ggcaacaaaa gagcgtttt aggattttta  
23881 aataagggtt ttaaagtatc caaaaaagaa ctcaatcaag ataaatttag cttttgtgat  
23941 gtcttttagt gttcaggcgt tgtaagccgt tttgcaaaag cacattctca ttttattatc  
24001 gctaatgatt tagaagatta ttccaaactc atcaataaat gttatctttc taataaagat  
24061 aaaaatttaa ccgaactttt aaaacattat cataaaattt taactcaaaa tttagaattt  
24121 caagcaggct ttataagtga actctatgct ccaaaaaatg aatcttgat ccaaaaggac  
24181 gaacgcgttt tttatactct taaaaatgct ttatatcttg atactttaag acaaaaaatt  
24241 gaaaaggaaa ttcctgaaga gctaaagcat ttttttatag cacctttaat ctatgaagca  
24301 agtgtgcatt caaacacgag tggagttttt aagggttttt ataagggtag agatggagtg  
24361 ggtaattttg gcggagaggc gcaaatgcc ttaaagcgta ttaaaggtga tatcgagctt  
24421 aaaatgccta ttttttcaaa tttttcttgt gaatttgaag tgggtcaaaa ggatgcta  
24481 ttacttgcaa aagagcttga aaatatcgat gtggcttatc ttgaccctcc ttataatcaa  
24541 catccttata gttcgaatta ttttatgctt aatttgattg caaattatca aagacctgat  
24601 gaaatttcaa agatttctgg cataccaaga gattggaatc gaagtgtttt caataaagaa  
24661 aagcaagcag aggatgcttt gtttgagctt attagtgatt taagagccaa aatcatttta

24721 ctttcttaca attgcgaggg ttttgtaaaa aaagaaaaat ttctaaagcg tttgcaaagc  
24781 ttgggtaaat gtcaaatttt agagcaaaaa taccgcacct ttagagcctc tcgcaatctt  
24841 aaaaatcggt ccattcatat acacgaacaa ttatacatac tcaaaaaaaaa tattttaattt  
24901 acaaatccat taaaagatta aaatccaaag catttatata atggtaattt ttaagcactc  
24961 attgccttta tataaaaaatc aaaactttgc gataattttt gagatataatg agtatttttg  
25021 taagagtcta tcaaatttta taaaccata agtggtattt taagcatttt ttgtttataa  
25081 ttaagccatt tgaattcag taaggactaa gaatgagatt aaaagtagga attttaggag  
25141 caagtggata cgcaggcaat gagcttggtc gtatcttact gaatcatcct aaagtagaaa  
25201 tttcctatat aggttctagt tcaagtgtgg ggcaaagcta tatgaagctt tatcccaaca  
25261 ctcttttaa ttttaattttt gaggataaaa atttagatga acttgaactt gatgtcttat  
25321 ttactgccac tccgcatgaa ttcagcgcga agcttttttag tgaaactttg ttaaaaaaga  
25381 tgaaaatcat agatttaagt gctgattttc gtcttaaaaa tcctaaagat tatgagcttt  
25441 ggtataaatt tactcatcct aatcaagagc ttttaaaaaa tgcagttttat ggactttgtg  
25501 agctttatca agaagagata aaaaatgcaa atttaatcgc aaaccaggt tgctacacta  
25561 cttgctctat actcagtctt tatccgcttt ttaaagaaaa aatgattgat ttaattcgg  
25621 tgattatcga tgcaaaaagt ggagtcagtg gcgcaggaag aagtgcaaaa gtagaaaatc  
25681 tttttgtga agtgaatgaa aatatcaagg cttatggctt agcttcacac cgccataccc  
25741 ctgaaatcga agagcattta agctatgcag caggagagaa aatcacttta caattcactc  
25801 ctcatctagt acctatgcaa aggggaattt taactactgc ttatgcaaat ttaaacatt  
25861 ctgtaagcga aaaagaaatt cgtgaaattt atcaaaaaata ttatcaagac aggaaattca  
25921 taaggctttt accgccgcag tcgtttccgc agactcgggtg ggttaaatca agcaattttg  
25981 cggatataaa tttcagcatc gatgaacgca caaatcgtat tattgtttta ggtgctattg  
26041 ataatttaaat caaaggtgca gcaggacaag ctgttcaaaa tatgaattta atgtttgatt  
26101 ttgatgaaga tgaaggactt aaattctttg caaatttgta aaggataaaa attgcaagtt  
26161 agagcaatgc aaaaaagtga ttatgaagga gtttacaagc tttggtgtga tatcaaaggc  
26221 tttggaattc gatcgattga tgatagtaaa gaaaatatag aaagattttt agatagaaat  
26281 ccaaatctta gtgcagtagc tgtggttgat caagaaattg ttggaagtat actttgtgga  
26341 cacgatggac gcacaggagg cttttatcat gtgtgtgtgc ataaagatca cagaaaaaag  
26401 ggtatagccc atgaaatgac aaaattttgt cttgaggcat taaaatctga gaagattaat  
26461 aaaattgcac tgatagcttt taagagcaat gatttgggta atgaattttg gaagcattat  
26521 ggttttacct taagagaaga tgcgaattat tatgatttat cgctcaattc tcacaatcaa  
26581 accagtttta atgtttgagg ttaaactatg caaaaatatt tagaaaaagc aaatgtctta  
26641 atcgaagctt tgccttatat acgcaaattc agctcaaaaa ttatacttat aaaatacggc  
26701 ggttcagcta tggaaaatga ggagcttaaa catttgtgtga tgcaagatat agctctttta  
26761 aagctttag gcttaaagcc tattatcggt catggcgggg gtaaagatat ctctaaaatg  
26821 tgcgaaaaac taggcgtaaa aagtgagttt aataacggac ttagggtgag tgaccaagcc  
26881 acaacagaag tagcaagtat ggtactaaat tatatcaata aaaatttagt ccacagcttg  
26941 caaaatttag gtgttaaagc tatagggctt tgtggcaagg atggggggct tttagaatgc  
27001 gtgcaaaagg ataagaattt aggctttgta ggtgagatac aaaaggtaaa ttcaagtatt  
27061 ttgcaagatc ttttagaaaa agattttttg cctataatag ctctatttg aatggatgaa  
27121 aatttcaata cttacaatat caatgccgat gatgcagctt gtgctattgc caaagcttta  
27181 aaggctgaaa aacttgcttt cttaacgat actgcggggc tttatgagaa ttttgaagat  
27241 aaaaattctt taatttctaa aatttctata actcaagcaa aagccttggt tgacaaaatt  
27301 caaggtggta tgtatgtaaa attaaaatct tgtatagatg cttgtgaaag tggagttaag  
27361 aaagtgcata ttttagatgg acgcgtgaag cattctttgt tgcttgaatt tttaccgat  
27421 gagggatttg ggactttagt gggttaaagg atgaaaatga attataagga gcaaaagtcat  
27481 attatcccta cttataagcg ttttgatatt gttttagaaa gtggagaagg ggtttatctt  
27541 ttagacgata agggtaaaaa atatcttgat ttttcaagtg gtataggtgt gtgtgcttta  
27601 ggatataacc atgctgaatt taatgctaag gttaaagctc aagttgataa acttttacat  
27661 actagcaatt tatattataa tgaaaacata gcccaagcag ccaagcattt agctaaagcg  
27721 agtggcttag agcgtgtggt ttttacaat tcaggagcag aaagcataga aggagcgatg  
27781 aaagttgcta gaaaatatgc ttttaataaa ggtatcaagg gtggaattt catagccttt  
27841 aaacattctt ttcatggaag aacactagga gctttatctt taaccgctaa tgaaaaatac  
27901 caaaaacct tcaagccttt aatttcgggt gttaaatttg caaaaataca tgatttttca

27961 agtgtagaac gcttagtcaa tgaaaaaact tgtgctatta tcttagaaag tgtgcaagga  
28021 gaaggcgggtg tcaatcctgc tcaaaaagat ttttacaagg ctttaagaaa gctttgcat  
28081 gaaaaaata tattgttaat cgctgatgaa attcaatgcg gcatggggcg aagtggtaaa  
28141 ttttttgctt acgagcattc aggaatttta cctgatgtaa tgacttctgc taaagctttg  
28201 ggggtgtgggc ttagtgtcgg agcttttgta gtgagcgaaa aagtagcaca aaaatcccta  
28261 gaagcgggtg atcatggaag cacttacgga ggaaatcctt tagtttgtgc aggtgttaat  
28321 gcggtttttg aaatttttaa gaaagaaaaa attttagaaa atgtttctaa acttacgcct  
28381 tatttagagc aaagcttgga aaatcctatc aaagaattta gtttttgtaa aaaaagaaaa  
28441 ggcttgggtt ttatgcaagg gcttagtctt gataaaagtg taaaagtagc tgaggtgatt  
28501 aaaaaatgtc aagaaaattc tcttttgctt atcagttgcg gggagaatga tttgagattt  
28561 ttacctcctt taatcataga aaaaagccat atagatgaaa tgagtgagaa gctaagaaag  
28621 gtttttaaaa gttttgaata aattttttat tgataaaaat ttattctttt ccatctacta  
28681 tgggtacaaa aagacattct tctagaattt ctttttgtaa atgagtagca tttttggtta  
28741 tgcgtgtgat aaattgttta ccattgtgca aaataggggc tacaagtatg ccccatcgc  
28801 ttagctgatc gagtaaaatt tcaggaattt gcgttgata tgcagaaaat aaaattctat  
28861 cataaggtgc ataatttttc catccatttt gcccatcttc aaatttaaca ttaatattaa  
28921 aaagctctag ttctctaaag ctttgtgctg cttttttggc taaattttct atgcgttcta  
28981 tggtaaaaac acgccttata actttactta aaatcgctgc ttgataacca cttccacagc  
29041 ctatttctaa gacactatct gcatctttaa aatttaaagc catagtcatt ttagctacgg  
29101 ttaaaggaga actgatccat tgagaattag ccaaaggcaa agcatcaagg cgataagcat  
29161 gagctttaag cggagaaaaa atttcgcgtg gaatctgaca aaaagcatta aaaagttctt  
29221 cattgataaa tactttttgt gcgatttctt cggccatact ttgacatcgt ttttgctcaa  
29281 atgcgttcat tttttctcct cataaatggc aaattgtaac gaataaaagt tcaaaatttg  
29341 attaaaaact aaaaattttg tttttcttat tgatattttg gttatactaa aaataaaaaa  
29401 ggataaaaat gcttattcga tttaaagata aaattccaaa tttgggtcaa aatgtattcg  
29461 ttgcagaggg tgctaagatt ataggggaag tggagatcgg tgatgaaagc agtgtatggt  
29521 ttaattgtgt ttttaagaggc gatgttaatt ttattaaaat tggcaaaaga acaaatatac  
29581 aagatttaac cactatccat gtgtggcata gagagttaa tgaagatgga agtttaaaag  
29641 atgcaggttt tcctacttgc ataggagatg atgttaccat agggcataat tgcgtaatcc  
29701 atgcttgcaa gatcggctct cgtgtgcttg tggggatgaa tgcagtgatt atggatgatg  
29761 cagctatagg ggatgatagt atagtgggtg caggaagtgt ggtaaccaa ggtaagaaat  
29821 ttccaccaa atcactcata cttggaaatc ctgcaaaaact tgtacgcgaa ctaagtgatg  
29881 aagaagtggc atttttaaaa caatctgctt taaattatgt tgaatttaaa aatgattttt  
29941 tgaattgatt taaaatttga aaatgcgata atgtttttat aagaagctca aatttatcta  
30001 ttttacttga attaaatagg taaatttggg tatttgagct atattagcaa attttttgca  
30061 ttatttattt gtaaaatttt gtcttagttt ggttaagtct tttgagagtt tgattttgta  
30121 tttttctttg ttgttaaaat caagaaattt ctcatcagc tttgaaattt gactttttgt  
30181 atatagagcg atttcttcta cttttttttg tttattaaga attttacctt ctttaaacac  
30241 acattttaaa agttcttttc tttctaaatt ttcacgagt tgaggtaatt tttcgttata  
30301 gatataaagt tcatcaaaaa gcattttttg agtgttttta tcataaattc taaaaagctt  
30361 tttaaaatgt ggaagagttg ttttttgctt gtcttcgctg attttgattt taggcgtgat  
30421 gagtttattt tcttctatgg caacgagttt ataaacacag ccaaaaatag gatcgcttga  
30481 agcagtgatg agtttttcac ccactccaaa agcatcgata ggtgcattat ttttaagcag  
30541 tttgtctata cttttttcat ttaaagaatt tgaacgatg attttgcat cttttaaatc  
30601 atttttatct aaaatggcac gaatttcttt gctgagtatt tctaaatttc cagaatcaat  
30661 acgcacaccg cattgtttga ttttaaattt tttaaatgct ttgatcgcgt tttctaacc  
30721 ttgtttataa ttataagtat cgatgagtaa gataggattt tgaggataaa gttctaata  
30781 acgacaaaaa gcactcaatt catcatcaaa catttgtacc caagaatgcg ccatagtccc  
30841 acttgtcata atgccataat tttttccagc aagtgtgcaa gaactagcct tgcaacctcc  
30901 tattatagct gctcttgctc ctttgagtgc tgcttcactt ccatgggctc ttcgtgtacc  
30961 aaattcaagc acgctaagat ttttagccgc tcttacgata cgattggctt ttgtagcaat  
31021 taggctttga tgattgatac ttaaaagtaa aaagctttca agaatttgtg cttcaatagt  
31081 attggctttg ataatcatca aaggttcggt aggaaagatg atctcgcctt cttgcatggc  
31141 ataaatttcg cccttaaatt taaaattttt caaatatctt aaaaattctt ctttaagat

31201 cccttgagag cgtaaataag ctatatcgcc ttcacaaaa tgcaacaag atacaattc  
31261 taaaatatcc tcaagtcctg caaatatagc aaaagaacca ttatcaggaa tttttctaaa  
31321 aatatatca aaataagcta ttttgttttc aaaaccattt agaaaataac cctgcatcat  
31381 ggттаattca taaaaatcgc aaagcagggt gttgtttggt tttgtgtaaa aatctttttt  
31441 catcaaagtc aatttccaag aaagttaaaa atcatcaaaa cttatactac ctttagaata  
31501 gtttgtaacc ttactttcaa agaagttgct tttttgatca ttaaatttag aaaaatcatc  
31561 taccattttg atagggtggt ttgcattgta aattttatca agattgatag ccacaagtct  
31621 ttgatctaca agatagtgga tatattcttc tataatatcg tctgtaaaac ccatgatttg  
31681 attttgagtg atatattttc cccatttgat ttctaaatcg cccgcttttt taaacatatc  
31741 gtaaatttta ttgatattgt tttcgttaaa taaatcaggt ctttctttgc gaactgaatt  
31801 aatcatattt tgaaagagta aaagatgggt gatttcatct ctttgaatga aacgaatcat  
31861 ttgagcagaa ccaagcattt tacctgctct tgcaagcgcg taaattgcag taaatccact  
31921 ataaaaatat actccttcta aaatttgatt tgctaccatt gctaaaagaa gtttattatc  
31981 atccacatcg ccagctaatt cttcatagat gcttgaaata aatcattttt tttcacgcaa  
32041 ggtttcatca tgcttttcca tttcatagat taaatccgta ttatcaciaa tggcttcaac  
32101 cattaccgca taagattttg aatgattagc ttcttataa gcttggcgtg ctaaaaccgc  
32161 attgatttca ggagcagtga tgtaaggatt gatattatca gctagattgt tggtttgaaa  
32221 gctatccata gaaatgagct gagaccaaac aagatcatac attctttttt cgcctgcagt  
32281 taaattacag cgataatcta atgcatcttt agttgtatct acttcttttg gaaaccaagt  
32341 gtttgcttcc attaaatccc ataattttaa agcccaagtg tattttgctt ttgtaaaatt  
32401 taaaattcca tgaggatttc cgctaaaaac tttacgatct gtcaatgttt catttgaact  
32461 tggattataa attctttttc tttgcatttt tttacctttc tttcatatct tctgtactat  
32521 gcaagtttggt gttagaatat catgtaaatt tagtttatct tttcttaaaa agcttataaa  
32581 taaacccaaa atcaacccaa aacttatgat aaatataata tatctcaata aaattctaaa  
32641 aaaagttatt tttttgccg tttttagatc gattagataa agatcataag ccttaagccc  
32701 tggactttga gcttttgagg ctaaaaataa agcttgaata aaaccaaata agaaagtaca  
32761 tagggctgtg atataggagt tgtttaaaaa agcttccttg gagcccaata aaaaataaaa  
32821 taaatataag atagggacat aaattaaaaa tatatctata agcaaagctc taaatcttaa  
32881 ccatctagag gctatttttg ccttagtttt catttaattt cgcgacttc ctggcttaat  
32941 agctttactt ctttctttgc aaagcggaca atcattttca tcataaattt gaaaatcaaa  
33001 atttcctaaa gtaaaaagag gtaaattatc aggcagtttt gcgcttggtt ttctaggatt  
33061 ttttaaatth tcaaccgcac aaaaaccacg atttgctaac gctgcaaac ctagaacttt  
33121 ccctcccaga ctttctatga ttttagcact ttctaaagca cttccgcccg ttgtgataat  
33181 atcttcacia atgataaatc tttcaccttt ttttaactca aaaccgcgct ttagggctcat  
33241 ttctccatta actctttcgg taaaaataaa gcgcttatca caagctctag caagttcata  
33301 ccctgctaaa attccccca aagcaggaga gcaaatgctg tcaaattcta tattaaattc  
33361 ggctataatt ttagcaagtt catcaciaag ttttgctgct aattttggat tttctaagac  
33421 ttttagcactt tgaagataaa atttagaatg tttaccgaa cttagtaaaa aatgtccttg  
33481 tagataagcc ccacaatctt tataaatthg ctctaaatcc atttttaaac ctttaaaagt  
33541 tgcctttctt tattttttac actttcatcg atttttgcag tataggatc tgttagtttt  
33601 tgcacttcat cataggcttt ttttagcttca tcttctgaaa tggctttatc tttttcaagt  
33661 ttttttacgg catcgtttgat atctttgcca atatttctta ctgaaacttt tgccttttca  
33721 cccatagctt tagcttggtt tacattttct tctctttgct ctcttgctat tggagggaaa  
33781 aataatttta cactttcgc atcattggtt ggatttactc ctatgtttgc tgctgcaata  
33841 gcgctttcta tagtttttaa cataggtttt tcccatgggg taatgcttat tgttgaagca  
33901 tgccttgcta aaacggttg atcttgattt aaaggagtta aagagccata gtaatctact  
33961 tgaatatgat ctaagatatg tgtattgacc ttgcctgtgc gtagggtagt aaagtctttt  
34021 tttaaagctt ctaagctttt ttcactttga gttttttggt tatttaaaat ttcattaatc  
34081 atattttttc cttataaatt acttacttgt atttatttca ttaggtattt gtggagcgtc  
34141 tggaaatagct ggcacattta tagcatttgg ggcagcagga atactcgtat ttgtttcgat  
34201 ttttaattttt tcagctaaag aatctttact tgtgctattg tataaatatc ccaaaccaat  
34261 agtattagca atcagtaaaa ttcccattat aaaagtaaat tttgctaaaa atcctgcggg  
34321 tccttttgct ccaaataagc tttcattact tccactataa gctccaagtc ctatacttga  
34381 acttttttga agtagaacag ctatacaaat aataacaacg atgacaaact gcaaaaataat

34441 taaaagagta atcataaatt ttcctaaatt ttaaaaatth tttgagttag atattgtaac  
34501 taaataaaaac ttgaaaagat ttgaaattht tgagaattht gcggggactt cccgcaaaaa  
34561 ttatctgcta ttgaaacttc ttaggatatt aagtaaagat acaaaaaggt ttacaaagtc  
34621 aagataaagt gctacagcac cttcaattgg agtttcatag tttccgcgaa taatattttg  
34681 tgtatcataa agaatataga atgaaaataa aatcgctgct acggctgaaa tagttaaatt  
34741 tagcaaactg ctttgaaaaa agatattaag caaggaagct gctacaacca cgattaaaac  
34801 tataaataaaa gctttaccca ttagcgtgaa atctthttta gtattcatag caaaaatact  
34861 aagtgccgca aaagctactg ttgttaaagc aaaagcttga gcaatgatta ctccgcctgc  
34921 tggtagagca agaacagaaa taagtaaggg cgttagggtt aagcccgaac aaaaagtaaa  
34981 gccaaaaagc aaaatthaat tcagtggagc ttcgcgttht ttaaattgca aagcaatthaa  
35041 aagccctatt tcgacagcaa aaagtatcca aaaggttact tgtgattgta taaaaaatgc  
35101 cgctaaagca taaattccta catatgcacc aacagttgct gctaaaagag aagctgcaaa  
35161 aagttgatag gtttgthtaa taaaaatacc aagttcactt gaacgagtgt tttcaaatc  
35221 tcttgatcgt gaatagtctc tatcgtaaag actcatattc atctcctta aaagatttht  
35281 gattthtaact taaatcttga gcgaactcta gcataaaaaa tthtaataaag agthtaattg  
35341 tgaatgthta cttgcaggtg aaattctthg ctgaaaatth gttataatth taagatttht  
35401 caattaggth gatatatgga taatctthatt agcgggtcga tthaaatthatt gcaagaggat  
35461 thtaagaac atgaagaact thttgaaagt ctthaaaaata agcaaaatcc tcatactctt  
35521 thtataggth gttctgattc tagagtgatt cctaattthaa tcactaatac aggccaggt  
35581 gaactthttg tgatacgaaa tatcgaat attgthccgc cttatcgtgt gggtcaggat  
35641 tathtagcaa ctacttcagc aatagaatat gctthaaatt ctttacgcat taagaatatt  
35701 gthgtgtgtg gacatagthaa thgtggthgt tgtaatgcgc tatactattc tgatgaagaa  
35761 thggataaaa thcctaathg aaaaaaatgg ctthactatgc thgatcctat aaaaagagat  
35821 gthacgatct thgcaagaga tgatathgct atgcgthctt ggctthactga aaaactthaac  
35881 thagtgaatt cthtgcaaaa ththththact thaccagggg thcaagaagc thtagatgaa  
35941 ggaagattag aagthgatgc thggtathatt atcattgaaa cgggtgaaat atathgagth  
36001 gattthtaagg cthaaattht taaatthaat caaaatagga aaacacaatg aaaaaataa  
36061 thattthatt thththtaggc atthcatgthc ththgggthga thgaatthcgc cthtatagata  
36121 ccaatacaag thgcgaagat aagagthgtht athagththgt gcaaaaatat atcgattthaa  
36181 atcgtcaaat thaaagaatth aaaaaaaata athgatgaaa thcaagthct thgatgthgaa  
36241 ththtaagcga atthgaaaaa gataaaaagt ctathctthc thaaatgccc gatathgatag  
36301 thaaagcaaca aatcaatgaa aaagcagthg aaagctththt aaaaacaagg caaaatthatt  
36361 thagattthgca aaagaagagth athaaacaac ctthatgthth thgtagataca acctthaaata  
36421 thtatathctt agathgthgtht aaaagththt atthcgtcttht atththgactt gaaaaacttht  
36481 thaaaaatgc agcaaatagth gaaagtataa thctctacggt cgataaggca atggaaaatth  
36541 thgcaaaatthc aaccaatata gatctthagth ththataaagc thaaatcaat aatccatctg  
36601 aathtagagaa aaththcath aaagaagaag thgattththaa thgctgthgath gctthatgthg  
36661 aaathththaa athaththgcgc gcaaatgchg atththgctaga aagcaatthatt atthththctt  
36721 thactthgaaact thcaagthgthg athagathcgha thcaatgaaat agccaatath gattththataa  
36781 athacagghthaa gathagththatt thcgtthththg thththagcttht ththththgctt ththagghcgt  
36841 ththththcaaa thathgththatt thththctctg ththgthththgtht ththththgcaat aaaagcghatg  
36901 cagathgathat thaaagththatt ththththagaca athaththaaaa accgghthggt thctthgctthg  
36961 ththgththgct thththcacth thgthctthacga ththththaccta thctactctt ththagththata  
37021 atththaaagthaa thctthththctat athaththththg ctgththththaat cgctthgghctg atthththaggha  
37081 thactthgathgthg athathgghcghg gththththgththt caaaactthgc acaaaaaagth gghthaaaaag  
37141 aagthcghthaaa thththgthcath aaaaththththt atthththgththt cthththgthgath gcgctthcttht  
37201 athaththththgca acaactthgghg ththththththct cagctaththatt cgcatctthth gghgathagghg  
37261 gthththgghcghgth gghctththgghc gcaaaagata ththththgcaaa cthththththgct thctathcttht  
37321 thgththththgca thaatagcttht aatcaagghgthg atthgghgththga agththctthgga gthgaaagghca  
37381 cagthgghgththga aacagghacth agaaagacaa ctaththcghaac ththththgathaat thgthctthgthatt  
37441 thththgccthaa thctactathc atghgghgghcaaa athathththaaaa ctghgagcaaa agacghcatghg  
37501 gghcghcathgthgth thaaaatathat cththgghgththg gthththgathgct thctctthgaa aaaththgaaa  
37561 atthgthgthaaa gghathththaaa gagctthththt athacghagthcc thththgghgghca cathgaaagathg  
37621 atghgagcaththt aaagthathgghg gathcathacaa caaaatathc gthththctathca



37681 atgatcttga gggctataaa aatgcttggt atgttgcttt gagtgaattt gcagatagta  
37741 gtattaatat agaattgtat ttttatacaa aggctataga tgcgaaagaa tttagagaag  
37801 ctagacaaga gttaatgctt gaatttatgc gtatcattga aaaaaatggt ttaacttttg  
37861 ctttcccaag ccgcagtatt tatatagaaa atttaccccc acttgattta aagcctaagg  
37921 tagtataaaa gatgaatagt aagaaatact cttactattc taaatatcaa actggcataa  
37981 cgcgaaatatt tgggctcagt tcttcttgca agatagtttc gatagcataa agagttgcac  
38041 cgcttccgct tgagcatccg ctgcaagctc caagatagcg aatatataca tcaattgcgg  
38101 caccttcggc cttttgtata tcaattactt ctaaactctc accatcatta tggagcatag  
38161 gacgaatttc tgcatctaaa acagcttcta ctgcttttaa ttgacctact aaagtcattt  
38221 catcaaatgc tacatcactt ttcacagcat ttttaagttt ctctctatcc atttcagctc  
38281 ttgtttcagc caaaatatca accagatagt attctctttt ttcattgtcct cctggtttta  
38341 cacaggattt acaaaaagca cctgctttgg tgtattgagt gatttcttct acagtgtgta  
38401 aatcattgag tttgatcact tctttaatag tgccaagact tactctagca cactcacaaa  
38461 ctatgatttg atcttcaaaa tcttcaggat tgattccttt ataatgcgct gctgcttggt  
38521 taatcacatc ataagccata accgaacaat gcattttttg aggtggaaca gctggagttt  
38581 ctggattatc tcgcattgca aattctacat ccaagttagt aattttaact gcttcatcca  
38641 cagtttttcc tatacaaaga tctaccattg tatcactact tgctatggca gttccacagc  
38701 caaagctttt aaatttagca tcgataatag tatctgtttt ttcattccaca agccaaaaaa  
38761 gtcttactgc atcgccacag ctttctgcac caaaatcagc tacgataagt ttggcatttc  
38821 tatttttggc atcttcttct gtaaattccc ccatatgttg tggattattc attctatctt  
38881 ggactttttg tgagtattca tcccagatag atccaccaat taaactattt tttcccattt  
38941 ttttatcctt ttatttataa ttatttggat tataagcata agtacaagaa attgctctta  
39001 agcgttctgt ggcagctttg atttgttttg ctgcataatc aatttcatct tctgtattaa  
39061 agcgtgataa agaaagtctt aaagctgtat gcgctaagtc attttcagct ccgattgctt  
39121 ccatgatagg attgctttct aatgcttcgc tagcacaggc tgatccgggtg cttgctgcaa  
39181 taccattttt gtttaaatcc caaagcatag cttcgccttc aacaccctta atacttgcta  
39241 aaattgtatt agggacgcgg tgctctcttt ttcctacaac actagtatct ggaagagcta  
39301 aaatactatc ttcaagttta tctcttaaac ggcgaatatg tgagtcttca aattcaagca  
39361 tagtgttcgc aatacgcaaa gcttctgcca tagcgactat ataaggcaca tttaatgtac  
39421 cacttcttct acctcccata tgctctccgc catgcaaaaag aggagtgagc ttaagacctt  
39481 ttttgataaa aagtccgcct acaccttttg gcccatggaa tttatgagct gaaaatgaag  
39541 caaaatcaac tcctacttgg tttaaattca ctttgatttt ccctactgct tgagtagcat  
39601 ctgtatgaaa aagcgcctca aattcatgag taatttctgc cattttttga atatcaaaaa  
39661 tcattcctgt ttcatattg gccacatta cgctaacaag tgcagtttta tcaactgatca  
39721 cattttgtaa atcttgagga gtagaaactc cttcttcatt tactggaagt tctataagct  
39781 ttacacctaa actttttaa aattgagctg cggcagctac tgctggatgt tctacgctag  
39841 agataatcac ttcatcgcgt tctttatcta aaatatgac aaaatatata cccttaagca  
39901 cccagttgat actctcagta gcacaggatg ttataactat atcatctaga tcatcctgcg  
39961 caagtccgc ataaagttta tccatagctt ctcttaaagc aggggtgagtt gcgctacccc  
40021 attgatgaag actgtttggg tttccataca tgtcttttaa aatggcaac attaatcgt  
40081 atgcatttgg atcaagcatc gttgttgcac tattgtctaa atatactttc actttaattt  
40141 ccttaattgt aattcggata tttttatct ctttatgaaa acggataata acagaaaaat  
40201 ataaattcta gtttaaaaat tatagcaaaa atatgaatat taaagtaaaa aaatacaag  
40261 aattatgagt taaaatttgt atttttaa atttataaaa ttacttttaa gcaatactga  
40321 taaataagaa tttaatatct tattttaaatt ggcttgtttt tgacgacgat ttaaaaaatt  
40381 ttctatagaa ttagaacgca tattgttagc attatctagt ttttctaaat ctttattttg  
40441 gctttggat tcttctttaa gagagttaa ttcgctatga ttttgatcaa tataaatttg  
40501 gaagatagag cttgaatttg caaactccct taaatccata tctttttgat aattaacata  
40561 ttgttgaaaa aaaactgaaa gtttatcttg ggaagcggtt tttttatcta ctccattcac  
40621 ataaagatat agatcaaac tcattttttg ttcattttgt tgcttaatat agtcttttat  
40681 atccatttct cctctaagga ttttttga attagtgtga gcattgagct ctaaactcgc  
40741 aggcttcata aaaaaattaa gctcgttatc attttgtgtt ttgatcat gataaataaa  
40801 attcatcaa agtcctgatt ttgaaacctc ggcatttttg gttaggtaag gttttaaatt  
40861 ttcattagat gaggtattat ttaacgctct atcaaaatgg aaattagtga ttttattatc

40921 cagcatta aa gtatttaggt ttagggtttt gcttagtggt gagtttaatt cttcttgatt  
40981 attataaaatt cttgaaat tgcctaaaaa ttctccattt tcagtagaaa atccagtagc  
41041 aaat tttgaa atcatatcgc gacttaaaat agcattatca ttttactaa attctaaatt  
41101 gatagacttt agtgagctat gatagctatt taaaagatag ggtaggtcta ttttgttgta  
41161 atttaaaatt gcatcttgct ttgttaattc tttggctata cttctaacgc ttttgatatt  
41221 gatattataa gattcgggta tattagcgat tttatttaag tctttttcaa aaaaaccttt  
41281 ctcatctatc ctaaagccaa attcgccttg ataagaagt gtgttaaaaa tataatttaa  
41341 attttctaaa ttgttttcat tttcttctaa atttgaacct ttcttatctt tgattaaatt  
41401 caaagcttgg ctat tttgca aaggattaga taaggccaaa ttttgataag ggtttgccga  
41461 atttatagtc attttaaatt ctttcaaaaa tattgctagt tttttataag caaaaggtgt  
41521 gccaaagttt tttaaatata aaattcagtc aaaaattagc aaaaatttgc tagcatttag  
41581 cttttctttt tgaaaaaatt taaaaattta tccgaaagga aagcgtatgc caaagatgaa  
41641 aagcgtaaaa agcgcagtta aacgctttaa agtaggtaaa aataaaatca aaagagggtc  
41701 tgcttttaga agccatattt tgactaagaa acctgcaaaa agaatgcgtg atcttcgcac  
41761 agctaaatat gtgcacagca caaatgtaaa agctgtagaa aaaatgttag gaatttaagt  
41821 ttttgacata agtcattcaa actccccttg atttgtttta agaatttaag ggcaagctcc  
41881 aaaatggacg ccactttatg aaaggaaata aaaatggcaa gagtaaaaaac aggtgttgta  
41941 agacgccgcc gacataaaaa agttctaaaa ttagcacgcg gtttttatag tggacgccgc  
42001 aacattttta gaaaagcaaa agaacaatta gaaagaagtc ttgtttatgc gtatcgcgat  
42061 agacgccgca agaaaagaga ttttcgccgt ctttggattg tgcgtatcaa tgctgcttgc  
42121 agattaaatg atttaagtta ttctaaat ttaaatggac ttaaaaaagc aggtattgag  
42181 cttgatagaa aaattctagc tgatttggca atgaatgatg ctgctgcttt tgcaaaaatt  
42241 gcagaagctg caaaaaaagc actttaattt aatgagttaa gatttaaatc ttaactcata  
42301 tttcgacatt tactacatta aactttcaaa atgcaaccct agtaaaaaatt aat tttgttt  
42361 aagatttatt aataaaatca caaaaattat ataataacaa aattaaataa ttacttgtaa  
42421 agaatagagt tttgtaacat ataaggctat tttagaaact ttcttgcata tatattaaaa  
42481 atcatcgtat aagtaaat taaatttagtt ataataacag attaataaaa aactatagcc  
42541 caaggaaaat atatggcaac tgatatgaat gaaat tttac tccgaagtgt tgaagtttta  
42601 cctcctttgc ctgataccat aaataaacta agaaaatata tcaacgaatc gggttcctaat  
42661 gtaaaaattg atgaaattgc taatattatt tcaagtgatc ctttaatgac tgctaagctt  
42721 ttacgcttgg ctaattctcc cttttatggg ttttcaagag aaatcacctc tttacctcaa  
42781 gttgtttctc ttttgggcat aggcaat tgc gtttaacca tcatggcaga ttcaattagg  
42841 gatagtttta aaatcgatgt atcgccttat ggattagaca cagcagattt tgtaagcaaa  
42901 tgcagtgagg aaacttcttt tattatggat tggttgggta atgaggataa aaagctatcg  
42961 catttgctag tgccttgttc tatgctttta agacttggta ttgtagtttt ttctaatttt  
43021 cttattcaaa ataaaaaaga tggcgagttc ttagctagat tggaaaaaaa taatttttagt  
43081 gatttatcta tagtggagaa tgaat tttta ggtgttgatc atatttcatt cttaggattt  
43141 ttgctttatc gttggaaatt tgatgatatg ctagt t gaaa ctattt gttt tgctcgatct  
43201 ccacacgcag ctagaaatga agttaaaaaa tcagcttacg ctctttcggg tgtcgatcat  
43261 ctttttacac ctcataataa tttttcttct tttaatatca aggcttctat tgctttgatt  
43321 aatgaagccc gaagtcaagg gattgatttt aatcttgata attttatctc aaaacttcca  
43381 aaagaggcta aggaaaactt aatcaaagaa ggttaaat tttgttttgt tggataaatg  
43441 aaaagtatta tcttaccctc taatgaattt ttagatcatt atgtttttaa tgcggaattt  
43501 catcgtttag ctggaatttc aaaaaatgct tataaatttt ggaaaaaagt agaaatcggt  
43561 agatatcaag ggactcgtat ttttttttta cacaagaatt ctatcctaga aaaacatcga  
43621 gaagttttta aacagtcgag tgatttaagt ggttttgtat tagcaagcgc cttttgttct  
43681 tttacgggac tagccccatc gcatcttggt aaaaaaaata attcttcaat ttataaactt  
43741 ttagatttaa aagaaattca tggatttaaa tttgtcaatc ttaaaaaatt ttatgatttt  
43801 ttggggctaa attattatca gcatatttac atagaaaaat gccatttttt tagccccacg  
43861 cttttgaaa agcgtataaa aatcactgag agtatgtgcg ttgggtatta ttaagatatc  
43921 taaaaataaa agctgataat aaagctaata aaacgattaa aaacataata taacc caaag  
43981 aaaaacgcca cgcattatct aaatttgcaa atgcaaattt atgcaataaa agtgcaagtt  
44041 gaggggttat gcctcctgca atggcatagg caatgttata agaaaaagaa agtcctgaaa  
44101 atttaattctt tgcttcaaaa acttcattca ttatcaaagg gcaaaaattc attactccgc

44161 caaaaaagca agccattaag taaaaaatac tgactaggat tatattagca tttgtattgt  
44221 aaagaaagtg aaaataaaat gcacaagcta agccaaaaaa caaggaaaaa ataataccag  
44281 atttaaaaat acctatntta tcggctaana ttccacttat aatacaacct aaagaaataa  
44341 agaaaattcc acccatttgt aaataagttt ggaaattggt atcaaatgtt aaaatttctg  
44401 ccatatattt tgggataaat aaaatcatta caataatata acctgtcaaa acccaagtga  
44461 tcaacattga gataacaaca cccgcttttg ctcttttaaa tacttcttta agcggaaatt  
44521 tttccaaaac attttctttt ctcatntgtt caaaaacagg agtttcactt aaaaattttc  
44581 taagatatat tgaataaagt ccaaaaattc cacctagaaa gaaaggaact ctccaagccc  
44641 actcatatag ttcttcttga gtgtaaattt tgtgcattag taaaaatact atacttccaa  
44701 gtaaaattcc acccactaca gaagctgtta aaaagcctat ataagttctt ctttgtcctt  
44761 ttggagaatg ttcatataca aaaatccaag caccgggcaa ttctcctcct atggaaatac  
44821 cttgagctat tcttataagc attaaaagtg ctacacaaag ataaccaata ctttcataag  
44881 aagggataaa ggctagtga caaagttggta ttaccataag taaaatactt agcataaaca  
44941 tttttttgcg cccaaattta tcacaaaat gtgccatcac tataccgcct agtggcttta  
45001 ccacataagc tgctgcaaat ataccatagg tattgaaaag ttgcaaaaaa gggcttaaat  
45061 tttcaggaaa gaagtttttt gaaatataac ttgaaaaaaa tgcaaaagata ataaaatcat  
45121 aaaattctaa ggttccgccc aaagatgaaa gtcctagtgt ttttatactt tttttactaa  
45181 gagtttttct catttttaat ccatttcata aaaatcatca tcatttgcct catcatcaaa  
45241 gtcataatca tcatcatcgt aattgttaga tttgtgatgg ttgtgggcat actcatcctc  
45301 ttcgccttca taatcatcaa attctaaatc ttcatcatca taagccatta tttactcctt  
45361 gataaataaa ataaaatcta attttagctt aaatntgatt gcttttgcta taatntttta  
45421 tattttttta aaaggttgat gatggaattg actcatttgg atgaaaacaa ccgccctaaa  
45481 atggtagacg taagtcaaaa agatgtgagt aaaagagtgg ccacagcaag cggtagatc  
45541 agcatgagcg aagaagcttt taaggctata aaaaacaata ccgcaaaaaa aggccccgtg  
45601 cttcaaactg ctgttatagc agctatcatg ggagctaaaa aaaccagtga aattatccct  
45661 atgtgtcatc cttgatgat ttctaagggt gagacagata tagttgaatt tcctaaagac  
45721 tataccttta aacttatagt aacggtaaaa tgcgagggtta aaacaggggt agaaatggaa  
45781 gctttaagcg gtgttagtat aggactgtta actatctatg atatgattaa agccatcgat  
45841 aaaacgatga aaataagcga aattgtactt gaaagtaaag aagggggtaa aagtggtaaa  
45901 tttgtgcatc cttaaacaag agcctattgt taattatcct actttttggg attataaggt  
45961 gatttttgaa gcacatgttc atgcaggagc tttgtttgaa gagcttttag gacaaagaga  
46021 ttttaataac aaacattcta atgcaagttc tagtggaaaa tatcaaagtt ttttactgag  
46081 tgtttatgta gatagcaaaa aggatcgttt ggatattttc gaaaaattaa aagctaaagc  
46141 taaatttgtg ctttaagaaa gaaggggatt ataataaaaa atactttgat tatatttgaa  
46201 aattctttat ccaatctcaa aaaagatgag gtgaaagatt tactcgagga tttaaagttt  
46261 aatcttgcac ataaacaat ttcgcaagat ccacacaata ctaaaaagat tttaaatttg  
46321 cttttggttg agtttttaac tatttttaaaa aaacttgatt tatttgatga tgaaaatggt  
46381 gcaaaagtta tcaaagcttt agtaaaagct agtataggag atgctcaaaa tgtcctttat  
46441 gaatatatca gcgaggcaga gttgctaaac aaacaaatcg aaaatcaaaa gaatttaatc  
46501 aaaaatcaaa tcagtataaa ttttcttgaa ttgaaaaata tcttacaaga atgttctttt  
46561 tgtaatgaat ttagcagtgg attaaatgat gcgattttat ttgatataga aatgcttggg  
46621 attttaaaag aaactgctga aagtgccttt ttaaccactc ttgaaaaagc tgaagatata  
46681 gagcttacta gtagtgaaat tgctaaaagt cttgtttata atgctatttg tgaggctcat  
46741 tttgaaaaag agcgtatttt aaaaatttca agtattattt taaatacagc ttttgagata  
46801 gcaaatgaat ctatggctta tgccaaagac ctttgtcttg gcgtgattaa agggactaga  
46861 gatggaattt ctttggctat ggaaaaattt aaaacttcac ttacttatgc aaaatttgaa  
46921 gaagatgtaa gtcttaaaag taaagaattg ataggcatag aagatgattt tatcgcgctt  
46981 ttaaaaagag aaatataaga acaaaaaaat ccatcaaaag atatagttga aaatntatta  
47041 gagcatgagc ttgataatct ttttgctaaa tttaaacgcc ttgctgttga gagtagggag  
47101 caattgcttt tggtttttaa tgatatcaag aaaaaccaa aatcaatga ttttaataga  
47161 ctgactcaaa gaaaattaca ccgcttttaa caagaaattc ttgagcttga aaaagtagca  
47221 ggagaaaaat acaagaattt aaattcaaaa aaagctaaaa aactaggtgt aagactttgg  
47281 gaaagggcaa aaaaactcat taaaaataa tatcccattt ttgggatatt aaatatctat  
47341 ttctatacct acagggcgcgt gatctgaacc aaaaatatca tctcttatga aagcattttt

47401 aagcttgtct tttaaacctg ttgaaatgaa aaaataatca attctccagc ccacatttct  
47461 ttctcttgct ttcattctat aactccacca cgagtatfff tctttgatat cgccattaat  
47521 ctctctaaaa gtatcaataa aaccaagttt tagcaaatca tcaatccaag ctctttctat  
47581 gggtaaaaaat cccgaggtat tagcatttgc ttttggatgg gtaagatcga tttctttgtg  
47641 cgcggtattg acatcaccac aaataataat ctcaaaaacca tcctttaaaa gcttttctaa  
47701 atacactaaa aaatctgcat agaatttcat cttaaaaccc aaacgctcct catctttttg  
47761 tccatttggga aaatagatat taaaaagtgc tatattttta aaacgatggt ctaaaactct  
47821 accttcttca tcatcaaaaa attcacattt tttcacttgc ctatcaaaat tgcaaagact  
47881 cataacacc gagtatccag ctcttttggc agaattagaa tacatatgct taaaaggata  
47941 ttcataaatt ttcttaggaa atttatcttc atgtgcttta atttcttgaa aacctataaa  
48001 atcaatattt tcctttatta tccaatcaag tgcattttta tcacaaatag ctcttaagcc  
48061 attgacattc catgaaagta gtttcatcag ttaatcctta aatttttgaa ataaaaataa  
48121 tatcataatt aataaaaaat attactaatg gttagtffff tccttttaaa ctttgctttt  
48181 tagttatfff ttaaggggag aatatgttta aatttaaact ttcttggttt caatttgtac  
48241 tttttaattc tatacttatt acacttttaa attttaattt gcattcattt gtttatgaaa  
48301 aattatccca aaattttatt ctaactttag tttttattgt ggcttatttt ggtttggtcc  
48361 atatgatttt ttcacttatt tttgtaaaat atttaactaa aatattatct atatttttta  
48421 ttttatcatc ttgcattagt ctttatttta tcacttttta tggaaatttta attgattcag  
48481 atatgataca aaatgtcgtg caaactgatg taaaagaagt gaaagatttg ctaagttggc  
48541 gtttggtttt atcggttatt attgttttgc ttttttgcatt ttttatttta aaaattcgta  
48601 ttgaaaataa tgtagagcaa gaatttttta aaagaatag agttaggatt ttaagtgcgt  
48661 ttttgggttg ttttatatft ttaatcttct ttatgccttt aagcaaaacc tttatacctt  
48721 tttttagaac ttacaacgaa ataagaatgt ataatgttcc tttttatcca atttatgctg  
48781 tatatcgtta ttatgtgcgt tttttaaaac caaagtccga atttaaaacc ataggcgatg  
48841 atgcgtttta agaagataat gccacaaaga aacttttagt ttttagtagt ggtgaaactg  
48901 ctagagcggc gaattattct cttggagaat atgctaaaaa tgataactaat ttttatacca  
48961 ataaaaataa tgtagtatft tttgataatt tttcttcatg cggtagctgct acggcgggtga  
49021 gtctgccttg tatgttttct ctttcaaagc gtcaaaacta ttcaagtagc gaatatcaag  
49081 aaaatgttat ggatattttg caaaaaacag gcgtaaaagc ttcttggata gataataatt  
49141 caggcaagtg taaaggagtt tgcgataggt tatctgacaa gcagcaactc tctagcgatt  
49201 gggatgagaa tttattgcct tctttaaaag aaagattagg caatttagat actcaaaata  
49261 tcatagttct tcatttgcaa ggctctcatg gaccagccta ttataagcgt tatccaagcg  
49321 aatttaaaaa atttactcca acttgcgata ccaatgaact ttcaaaatgt gctagtgagg  
49381 ctttaatcaa tacttatgac aatactttgc tttatacgga ttatctttta agtgagatta  
49441 tcgaactttt aaaagaaaaa aaagattatg agagttcttt attatatctt tcagatcatg  
49501 gagaaagtft gggtgaaaat ggaatttatt tacacggaat gccttatgct atagcaccaa  
49561 gacatcaaac tcatattcct gttatftttt ggagttagtga tgaaaattta atgaccacag  
49621 ctcaaaatca taaaagtfta aatctttctc aagataatct ttttagcacg cttttgggtt  
49681 attttaatat tcaaaccgct gtctatgagc caagctttga tatattaaat caagctttaa  
49741 aggctaatta atgaaaccaa aatatcatct tttaaataat gcacgatatg cgctagaagg  
49801 aattctagcc ttgtttaaaa atgaaatggc ttttcgatta gagctttgcg tgattatccc  
49861 cgctatcgft tttagctttt ttttagatgt aagcttttta gagcatttat ttttaatcgc  
49921 tgttttaatt ctcatcgtaa tcggtgaagc tttaaattca gccatagaag cttgtgtgga  
49981 tttgattaca aatgaatggc atgaaaaagc taaagtgtct aaagattgtg caagtgcggc  
50041 agtattfttt agtgtgtgtt tagcgcfttt tacttggggt tttatcttag gaaatttatg  
50101 gctgtaaaaa ttgaaaattt aatgagagaa attttaggca aaaaacgctt tgagctgctt  
50161 caatttttat gtgaaaatgc ggatgagaat ggttttgtga tggtaaaaaat aagtgagctt  
50221 gaagcaagat taaatcaag caaacctacc atcatcgcaa cttttaagtt tttagaagaa  
50281 aaaaagctft ttaaaaagtt gaaaaatgga ttttatcaac tttgcatccc ttgtgattag  
50341 aaaataaatt tttattttta gtattcttta tcttagaacc actttttatt attattttta  
50401 gctttatagg ataaaaattg cttatcgatt taggagaaaa aatgacactt aaaaaccac  
50461 tagatatgca tttgcattta agagatgaaa gtatgctagg tttggttgca ctttttagtg  
50521 ctaaagattt tcgcgcggtt gtgattatgc caaatttagt tccaccactt tgtgatttag  
50581 agagtftaaa agcttataaa acgcgtataa taaatgctag taaaaatgag aatttctc

50641 ctttaatgac tctttttttt aaaaattatg atgaaaaatt tcttgaaagt gccaaagatg  
50701 aaatTTTTGG tatcaagctt tatcctgcag gcattactac aaattcaaaa ggcgggggtt  
50761 caagctttga tatagagaat ttaaaaccca ctttagaagc gatgagtgat ttacaaattc  
50821 cacttttagt gcatggagaa accaatgatt ttgtgatgga tagggaaagc aatTTTgcta  
50881 aaatctatga aaatTTggct aaaaatTTTc cgcgtcttaa gattgttatg gagcatatta  
50941 cgactcaaac cttatgtgaa cttttgaaag attatgaaaa tttatatgca accattactt  
51001 tgcatacttt aatcatcacc ttagatgatg ttatcgggtg aaaaatgaag cctcatcttt  
51061 tttgcaagcc tatagctaag cattataaag ataaagaagc gctttgtgag cttgcttttg  
51121 gtggatatga aaaagctatg tttggaagcg atagcgcgcc acatcctaag catgaaaaag  
51181 aatgTTgCGG ttgtgcagcg ggtgtgttta gtgcgagtgt ggcgctttgt gttttagctg  
51241 atcttttagt taaaaattca aatgaagtta atTTgcaaaa gtttatttca gataatgctt  
51301 gcaaagtgca taatttaacc tttgaaaagg aaaaaatcat tgttttagaa aatcaagaat  
51361 ggcaagtTCC aaacgaatat aaaaacgaaa gtgaaaaagt agttcctttt atggcaggag  
51421 aaactttaaa attttagagta agataaaaac tagttttaaa actagttttt atctaaggTg  
51481 ttatTTTTTA taatacggct aagatTTTat taagattgtc ttttttgatg cttttccaca  
51541 ctaaaaaacca atccacaatg caccatatcc ataaagcaaa tagaattaaa ccaccgatat  
51601 aaatccaaat ggtaacaaca cctactaacc aagttataag ttttagcgacc cccaaaccta  
51661 tatcgccctt ataaaaacga tcaattccaa aggcacctaa aaatagacct aagatcaaac  
51721 ctataatatg gcttttaaaa ggcaagatgg caagagagtt gattttatcc tcaattgcat  
51781 ttttaagctt gtcttgCaca aggggcaagc tattagatgg aatTTTgtct gaaatcatca  
51841 tcaatacagt atttatatcc ataaaatctc ctataataat attagaacaa aataataact  
51901 aaaataatct aaaattactt ttaagTTTaa ttttataaaa tgagtatttt gataaaaata  
51961 tttcagtatt acaagattat atatctacct taagatagaa ttttatctta aggatgatta  
52021 aaaaaccaa agtttgattt ttgattgtat agtttctgtg atatcatctt tcacaaaagc  
52081 ttctaaatct tgcttggag ctttaacccc attcatatct aaatgccata aagcattttc  
52141 tatagcttca tcttttcttc ttttactat gcgtgtttca tcaaagacaa atttatgaaa  
52201 ctttataatca ttttctagca aataactttc caaatcctgc ttataaacac ctttaaattc  
52261 cgtattaaaa tgcttaaaaa taggatctaa aaaatcactt tttctataat ctgccaacc  
52321 aagataaatt cgaaatttag ctaattggat aaagTTTaaa taatctttt tatcttgcaa  
52381 agcaggggac atactcaaaa aggctatgtc aaattgagta ttttgatttt tacttaccCa  
52441 ttcagtaaaa gtgcaatttt catatTTTat atTTgtTaat tggagTTTTt tagcatcttc  
52501 ttttaaaatt tctaacaatg cttttgcatt atcaagggcg gtgatttctt ttgcattttg  
52561 tgctaagtgt aaagtccata ctctgtgcc acatcctata tctataatgc ttttattttt  
52621 aaagcttata tttagttttt ctaattcttt aaaagTTTgc tcttgatgg aattgagttt  
52681 ttgattgtat cttgcgtagt ttttagcttt tttatcccaa agattcattg atagtcctta  
52741 tttttaaatc aataaaatca tagcataaaa aataactaaat tattaatta tctatttata  
52801 aaacaaacca acccaatcta cctaggtgtt aatgaataat gaattaaaag atatcaacga  
52861 gtaatcaact aaaagtacca acaaatcaaa atcttttagat tgatactcgc atatcaatct  
52921 aaatTTTata t

//

LOCUS DMACINML\_11 50181 bp DNA linear 16-DEC-2020  
DEFINITION Campylobacter species strain strain.  
ACCESSION  
VERSION  
KEYWORDS .  
SOURCE Campylobacter species  
ORGANISM Campylobacter species  
Unclassified.  
COMMENT Annotated using prokka 1.13 from  
<https://github.com/tseemann/prokka>.  
FEATURES Location/Qualifiers  
source 1..50181  
/organism="Campylobacter species"  
/mol\_type="genomic DNA"

```

gene      /strain="strain"
81..1049
CDS      /locus_tag="DMACINML_01573"
81..1049
/locus_tag="DMACINML_01573"
/inference="ab initio prediction:Prodigal:2.6"
/inference="similar to AA sequence:RefSeq:ADT66151.1"
/note="conserved hypothetical protein"
/codon_start=1
/transl_table=11
/product="hypothetical protein"
/protein_id="Prokka:DMACINML_01573"
/translation="MGSDFNKAAGLPEDFKIHKSTLDEIKKAAENDPVASSIKEYLGV
SEYYTNIDMAETIKQYYNLFNSALEQSFNDKTSFSEADINSMPKGYAINGIKSMDFN
DPSNRMNITHLRDFSNSFITNIYQIPEQMKEAESLYIQSGSLIDGINGHSFGLSLEEI
KNISKGEDWQFNPDMSVYPQNEGDSYSKETLFMSFLKSYGSGQPVESSETTLNPKVEA
YNRAMAKESFNGDSIALNDIMTGKVDFFASLLKGYAQEGWLDADIYAMDGKVKWQNTSI
GYGGAWFDNQFNQAKANGWKASSQSIDSYVNSIMDRLNLLGQTRV"
gene      1194..2489
CDS      /locus_tag="DMACINML_01574"
1194..2489
/locus_tag="DMACINML_01574"
/inference="ab initio prediction:Prodigal:2.6"
/inference="similar to AA sequence:RefSeq:CKG79232.1"
/codon_start=1
/transl_table=11
/product="FIG00470444: hypothetical protein"
/protein_id="Prokka:DMACINML_01574"
/translation="MSIFSINDNSNYGSILSQSKANKESKENSISFANAFLKQNASK
LNEIQNANSQTLARSEVLNSSNSTNISNYFSKTSSPNYDISSEFKNSIYTLKYKQVD
LSTDTAYGYSVDKGYMGSDFNKAAGLPEDFKIHKSTLDEIQRYNENSYFFADKKEYL
GISGNYFTNIDMADTIKQYYNQFNQIINHTFNDTNKTSFSEADLNSLPKGYSVSDTNK
DFASLERLDTQTITNYYNTQEYQDEMEQLGTIASISLGLQLDFTPQSMQTQNLQDS
ARDTFNPDMSFYPKNEDGTYTKEDLFMSFLKASGGEVLGGDTKINPIIQSFREMAK
ESFDGSLASLDDIMTGKVDFFASLLKGYAQEGWLDADIYAMEKGIKQNHIGYGGGAWF
ERELNQAKANGWKASSESINSYVNSIMDRLNLLIGQTRV"
gene      3004..3684
CDS      /locus_tag="DMACINML_01575"
3004..3684
/locus_tag="DMACINML_01575"
/inference="ab initio prediction:Prodigal:2.6"
/codon_start=1
/transl_table=11
/product="hypothetical protein"
/protein_id="Prokka:DMACINML_01575"
/translation="MIDFSLCQEEFNFLKKEGGILILDQTQNNFDMAKINDDYYDGIF
FKVDAYKEFIKDCAFKDYRVVLVETGIDQILLYKYRHKIEDFLDRGGIFISFAANFLE
WLPGNMLYKESKYPIKDRVIQTNGHEITRGVKDYDITYRRGVCGFTRGYFEPKKESE
IVLKDNFNQCVAYIDYDTTSGVIVSTAGADLFNYGLFEQSTAKRIGFNLLWLSKIIK
NGKPKGIK"
gene      3681..4295
CDS      /locus_tag="DMACINML_01576"
3681..4295
/locus_tag="DMACINML_01576"

```

```

/inference="ab initio prediction:Prodigal:2.6"
/codon_start=1
/transl_table=11
/product="hypothetical protein"
/protein_id="Prokka:DMACINML_01576"
/translation="MKRAIITGGAFHNQNFVKVNNKFGDMFQERIYLPKLAIDLMLV
YDYIVIASRLNVGFLQNKDKFLEYLKNGGHIVSFGDVKADYLPYIDFEETQVNFWWW
IHKGADLPLYQYDKNNNIWQFLDIKECKWHYHGFYNIKEGCEKIIVDELGRSILYKDA
TSFKGNMYVTSLDPDYHIGQGFMPIITIPFLEKFISWVEEDIRHK"
gene 4348..5310
      /locus_tag="DMACINML_01577"
CDS  4348..5310
      /locus_tag="DMACINML_01577"
      /inference="ab initio prediction:Prodigal:2.6"
      /inference="similar to AA sequence:UniProtKB:P44206"
      /codon_start=1
      /transl_table=11
      /product="hypothetical protein"
      /protein_id="Prokka:DMACINML_01577"
      /translation="MIHKMVVMFFVMVSCVYGEQRVAIIGGLWPLASVAAFWTDKIV
YMPKASFNAMENSLASKYRQEYKQAKVGNSENLEELITINADIYICGVANIKLCSALR
KAGLNVVELTTNVDNYSKKTLEHWLVSLEKYFSIQNNKLLDEITQVENFIASRVG
EHRKAIIRQIDKGSILSGVFSHYLITKSGAENPLGEILGNKINIEEYKSDPDVIY
ISNFTPLMPEDLLQNKKEWKNMKAVKEGRVYKLPLATYRPFAPSLDLAPTLMFMAQKNY
PSAFKDINIEEYKHFQMRYFGISLDDNDLHKILNPSNAGILN"
gene 5334..7403
      /locus_tag="DMACINML_01578"
CDS  5334..7403
      /locus_tag="DMACINML_01578"
      /inference="ab initio prediction:Prodigal:2.6"
      /inference="similar to AA sequence:RefSeq:EAQ73281.2"
      /codon_start=1
      /transl_table=11
      /product="TonB-dependent receptor, putative, degenerate"
      /protein_id="Prokka:DMACINML_01578"
      /translation="MKKFFYISLISSCLLAQEADVKTYSLDKIVVAGDEINDDVVWDI
LQLEELPTRSVSVSQKDILSKGGSGGVQGLLESVPGIMYSRSGGVGGQLSVRGMNS
NNSRSIIAIDGVRVTGRSTLELN MIDPNSLEGIEVIRGSASSLYGSNAINGVINFKTR
RYNGDINEPFKMDAKIRALEFNSVNAGFGSRAELGGGDGWDILLGIHGRKGDDFRTP
EGIAKNSKYQSYGTFNIGYTKDNIRYYTQGKFQKINTYNAGGIHAKPGSYYGIVRNE
DPMYEEYIRGGVEVDLEIADKMDAYLYWRHYDTDLWIDRRSIGESFIHQLVHNTNQV
GGALNFNKEIDRHSLGYLSVLSAISPTPTKQINQISNQEVTTSRSTIDTEIAAYIKD
DYRLNDNWILSSSLRYDYIITQIGSNKFTNETQDMTDFLNSHKKKTS DALTG SIGALY
YINDKIALIGNVSQNFKSPGTTGLFPSATSEANHDLKPEYAQTYEIGGRYQEGSHYGS
LVFFRTDYTDMIQININIGGGKVQARNIGKAYIQGIEFESHHRIMENWLVDIIAAYNYG
QDKTADKPLAYIAPLYGNLALGYEFNWGYIKWIQKAYLGKNRIDSTQERETNSYTITD
INVGVDLKHFNKEWKDMLTFGVENL FNQKGRNPPTAEDIAYARALTNPLLEPGINAF
VKFAYKY"
gene 7407..8396
      /gene="chuB_2"
CDS  7407..8396
      /gene="chuB_2"
      /locus_tag="DMACINML_01579"

```

```

/inference="ab initio prediction:Prodigal:2.6"
/inference="similar to AA sequence:RefSeq:ABV53113.1"
/codon_start=1
/transl_table=11
/product="putative hemin transport system permease
protein"
/protein_id="Prokka:DMACINML_01579"
/translation="MLKYIIGFLILVLVSFYVMGIGRYEISYMQMLKVIYAVVLDQPS
VDEKLEYILFNVRIPRIILAIIFVGASLGASGASFQAI FRNPLASPDILGVASGAGFGA
ALALLLGANVYMLTFFAFVFGVLTFLTLVARDYSNRIMIVLGGIITAFFQSLISL
LKYIADPQDTLPTITYWLLGSLSVSNLQQLVFCCIGMFIGGLIIVIYRWKHNLMLDD
NEAKSLGLNIVRLRIILIFATTLIVSCVVSICGIIGWVGLIIPHIARIIVGSNMAKVI
PFSLIIGALFMIVIDTFSRSVSSEEIPI SILSAIIGSLFFMAILFKMKGEMRL "
gene 8393..9133
/locus_tag="DMACINML_01580"
CDS 8393..9133
/locus_tag="DMACINML_01580"
/inference="ab initio prediction:Prodigal:2.6"
/inference="similar to AA sequence:RefSeq:ABS43735.1"
/note="iron"
/codon_start=1
/transl_table=11
/product="hypothetical protein"
/protein_id="Prokka:DMACINML_01580"
/translation="MSLFRVENGT FIRNQRIIFKGINFAIDKSEVLAILGRNGVGKTT
LIQCCMGFLKWADGASYLQNRAVETISHQELFSKISYIPQAKNLKIGLKVLDMILLGF
NTKITTIPKKEHIDKANEIMEDLEIMHLAQKTCDCLSGGELQMVIFARALVNEPLLIV
LDEPESNLDFKNQDRVLKTLFLKKGKSVIINTHYPQNAQRLADKILIMHKNRDCII
GDKQLINKRQLSKSFEVDRSFFEYMATL "
gene 9337..10107
/gene="glnH"
/locus_tag="DMACINML_01581"
CDS 9337..10107
/gene="glnH"
/locus_tag="DMACINML_01581"
/inference="ab initio prediction:Prodigal:2.6"
/inference="similar to AA sequence:RefSeq:CAL34945.1"
/codon_start=1
/transl_table=11
/product="putative glutamine binding periplasmic protein"
/protein_id="Prokka:DMACINML_01581"
/translation="MKKIFYFLTLFFALNLA AKDLVGMELGYPPFEMSDKDGKASGI
SVDLFLEAFKENDYKLIVKNIAWDGLIPALRTGKIDLIMSSMITDDRKKAVDF SIPY
AQANLAILTPLNSDIKNIKDLQKGKILALKRGSTGHLYANKNLKNATIHLFDKENAA
ILEVIQKADGFFYDQLTIYRTWQKHQDTTRAILAPFQENPEFWGIAIQGNKELKKE
LDDFITQSKKDGLFDSLGEKYLKEVKDTFKKENLQFFF "
sig_peptide 9337..9393
/gene="glnH"
/locus_tag="DMACINML_01581"
/inference="ab initio prediction:SignalP:4.1"
/note="predicted cleavage at residue 19"
gene complement(10131..10874)
/gene="fliP"
/locus_tag="DMACINML_01582"

```



CDS complement(10131..10874)  
 /gene="fliP"  
 /locus\_tag="DMACINML\_01582"  
 /inference="ab initio prediction:Prodigal:2.6"  
 /inference="similar to AA sequence:RefSeq:CAL34948.1"  
 /codon\_start=1  
 /transl\_table=11  
 /product="flagellar biosynthesis protein"  
 /protein\_id="Prokka:DMACINML\_01582"  
 /translation="MKKILTLFISGFFSVIFAAEATIPVNLSSAPDTPNQLVTTL  
 NIVIVLTILALAPSIVFVMTSFLRLIVVFSFLRQAMGTQSMPPNTILVTLALILTFFI  
 MEPVATKSYNEGKPYLAEQIGYEEAFARGVKPFKDFMLKNTREKDLALFYRIRNLPN  
 PKTIDDVPLTVLVPAFMISELKTAFEIGFLIYLPFLVIDMVVSSVLMAMGMMMLPPVM  
 ISLPFKLLIFVLVDGWNLLVQRLVESFVT"

sig\_peptide complement(10815..10874)  
 /gene="fliP"  
 /locus\_tag="DMACINML\_01582"  
 /inference="ab initio prediction:SignalP:4.1"  
 /note="predicted cleavage at residue 20"

gene 11015..12304  
 /gene="glmU"  
 /locus\_tag="DMACINML\_01583"

CDS 11015..12304  
 /gene="glmU"  
 /locus\_tag="DMACINML\_01583"  
 /EC\_number="2.7.7.23"  
 /inference="ab initio prediction:Prodigal:2.6"  
 /inference="similar to AA sequence:RefSeq:CAL34949.1"  
 /codon\_start=1  
 /transl\_table=11  
 /product="UDP-N-acetylglucosamine pyrophosphorylase"  
 /protein\_id="Prokka:DMACINML\_01583"  
 /translation="MKTSILILAAGLGTRMKSEKPKVLQELCQKSMILHILEKAFAS  
 EDVSVVLSHQKERVEKEILEHFPKTQILEQDLINFPGTAGALKGFTPKNEKVLILCGD  
 MPLVEKTSLEALLQSDGELSLAVFNARDAKSYGRVVIKDDQVEKIVEFKDANEEERKV  
 SICNAGVYVIESKLLAQILPLIDNHNAAKEYYLTDSISLAKKQGASIKAVFVDEDEFM  
 GINDKFELNIAQNLMQEKIKKHWMKQGVIFHLPQSTYIGMDVEFVGECEVYENVRIEG  
 KSKIVNSIIKSSSVIENSIVENSVDVGPLAHLRPKCELKDTHTIGNFVECKNAKLVGKA  
 GHLSYLGDCIEISGTNIGCGTITCNVDGKVKHKTIIIGKNVVFVGSQTQFIAPVKIEDDV  
 IIAAGSSVDCNVESGVLFINRAEKKLIKDYFYKFKQ"

gene 12301..13458  
 /gene="dfp"  
 /locus\_tag="DMACINML\_01584"

CDS 12301..13458  
 /gene="dfp"  
 /locus\_tag="DMACINML\_01584"  
 /EC\_number="4.1.1.36"  
 /inference="ab initio prediction:Prodigal:2.6"  
 /inference="similar to AA sequence:RefSeq:CAL34950.1"  
 /codon\_start=1  
 /transl\_table=11  
 /product="phosphopantothenoylecysteine decarboxylase"  
 /protein\_id="Prokka:DMACINML\_01584"  
 /translation="MKKTILLAISGSIAFYKAYELISLFKKEGFRVKVLLSNGLLKFA

SKMSFEALADEILCEENESWKNSNNHIAFSKDADLILFAPASVNSINKLALGIADNLF  
 IQTLIATNKPLIIPAANTNMYHHFSTQNSLVLLKKNQALIIIEPISKILACKDEGIGA  
 LAEVKIDIFNISKRELLKQSFWDKEVVISGGGTKEKIDNVRVSNFSSGKMAKAIADA  
 FYFLGAKVTLSSVYFDTPYPLKSFESSLELKELEQNSNKDYLIAMAAVSDFIPEFK  
 KGKIKKNEHLEGLNLHLRLNEDLLKNLNFKGKKIGFKMEFDAQNALENAKKSLNDKKL  
 DMVCLNILEEENYFGSSKNEIHFITANKIEKSGLSKEDLAFDLASWCEKI"

gene 13455..14072  
 /locus\_tag="DMACINML\_01585"

CDS 13455..14072  
 /locus\_tag="DMACINML\_01585"  
 /inference="ab initio prediction:Prodigal:2.6"  
 /inference="similar to AA sequence:RefSeq:CAL34951.1"  
 /note="hypothetical protein Cj0823"  
 /codon\_start=1  
 /transl\_table=11  
 /product="hypothetical protein"  
 /protein\_id="Prokka:DMACINML\_01585"  
 /translation="MNMINSTLPIQMKVLAKSGYAHYTLNHRKIQTSMIELEIGA  
 EYLAELYIEKGGAIAFKHLKRPEFYFEEGLSLIVEILEGRVDYKKYIISNLLECKD  
 KEKYHVLKEMLFASFENIYHIPFIFEGKACLFQMKRKFLEVVLYFSVFGALKILID  
 EGGISIFTPFFKVQKFLNEQLKFVNLQDKNIQPLFVFKKLFDFKG"

gene 14075..14743  
 /gene="uppS"

CDS 14075..14743  
 /gene="uppS"  
 /locus\_tag="DMACINML\_01586"  
 /inference="ab initio prediction:Prodigal:2.6"  
 /inference="similar to AA sequence:RefSeq:CAL34952.1"  
 /codon\_start=1  
 /transl\_table=11  
 /product="undecaprenyl diphosphate synthase"  
 /protein\_id="Prokka:DMACINML\_01586"  
 /translation="MNELKHLAVVMDGNRRWAKAKGFLAKLGYSGVKTMQKLMEACV  
 EEGISNLSLFAFSTENWNRQDEIEFIFELLDRCLDEALKEFEKNNVRLRAIGDLSRL  
 DTHLQEKIALVEEKTKHCDLLCVNLAISYGAKDEIVRSVKRLIEKGLEINEKNISDNL  
 DLPLDVLMLRVGNARLSNFWQCAAEIYFSETLFPSTLTKREFKIIKEFRKRER  
 TFGK"

gene 14733..15512  
 /locus\_tag="DMACINML\_01587"

CDS 14733..15512  
 /locus\_tag="DMACINML\_01587"  
 /inference="ab initio prediction:Prodigal:2.6"  
 /inference="similar to AA sequence:RefSeq:CAL34953.1"  
 /codon\_start=1  
 /transl\_table=11  
 /product="putative processing peptidase"  
 /protein\_id="Prokka:DMACINML\_01587"  
 /translation="MENNPIAFLILAILGASLGSFCMSMTMRFCEKPLLSLRSYCFS  
 CHQKLPLELIPFSYIFLCFRCKTCHTKIPFYVFLAEILGIIFAWIAYLLSQDMVEF  
 IHLLIFLFLVLFALSCIDLKFAVPQKLLWLIFFVAFSFAFNSDEFMYFFIFENFQNGF  
 MVQAFIFAGFLFLLKNFIAFIKNFRTKNIQENLGDADIIILASIAGIFGFKGAFIILF  
 LASLLSLPFFVYNKNIKLAFLPFINAAFVMYLIYLVQELI"

gene 15509..16534

CDS /locus\_tag="DMACINML\_01588"  
 15509..16534  
 /locus\_tag="DMACINML\_01588"  
 /inference="ab initio prediction:Prodigal:2.6"  
 /inference="similar to AA sequence:RefSeq:CAL34954.1"  
 /codon\_start=1  
 /transl\_table=11  
 /product="putative integral membrane protein"  
 /protein\_id="Prokka:DMACINML\_01588"  
 /translation="MKLALRYVLNQFLSTNLSIFFVLFTIVSMVFFIQLAKLTSSIEI  
 NFVDLLKLYGFMLPRILIFTLPIAFFIALALALFRLSRENESIVLFTLGFSPKILAKF  
 FLKIAALVSALMLIIVALMPIVIFELQDNFVNFKKTQVKFNKYKTGEFGQRFLEWMIFI  
 ERQESDRYENIIMYHPKRNIEDKEQLIIAKEAIVQKNEDSFAFKLSNGKMYNFENDQT  
 LFIGNFDKLIIVNTQFDNQNLQTKKFYEYWNLDLNTNPQRAKEFVIYVTIALFPLASTLF  
 ALSFGIVTYRYEKGFYFGMFGVIAVYFGLLSSFSQPPIILASVGIFILSFIASIVCFK  
 KMILSRY"

gene 16534..17256  
 /gene="truA"

CDS 16534..17256  
 /gene="truA"  
 /locus\_tag="DMACINML\_01589"  
 /EC\_number="4.2.1.70"  
 /inference="ab initio prediction:Prodigal:2.6"  
 /inference="similar to AA sequence:RefSeq:CAL34955.1"  
 /codon\_start=1  
 /transl\_table=11  
 /product="tRNA pseudouridine synthase"  
 /protein\_id="Prokka:DMACINML\_01589"  
 /translation="MKLKIVFSYDGSKFLGSATQPHKKSVDALQDALSHLGIFSAVL  
 MASRTDKGVHASYAVACVECGEHFSNLSYLKKQINKFSHPFIHIKLNKIMPSNFVRY  
 NVKSREYRYIFYHGAYNPFLASYVHFYFPFIDILKADLILQNFVGVKDFKFFCKSSGDN  
 KTTIREIFLAKAYSYKDFITFRFKANGFLRAQIRLMVASVLKVLENKMSEELKEQIE  
 AKKQYNHFLAPPCGLYLSRISY"

gene complement(17253..18464)  
 /gene="ilvA"

CDS complement(17253..18464)  
 /gene="ilvA"  
 /locus\_tag="DMACINML\_01590"  
 /EC\_number="4.3.1.19"  
 /inference="ab initio prediction:Prodigal:2.6"  
 /inference="similar to AA sequence:RefSeq:CAL34956.1"  
 /codon\_start=1  
 /transl\_table=11  
 /product="threonine dehydratase biosynthetic"  
 /protein\_id="Prokka:DMACINML\_01590"  
 /translation="MLELNKIYQAKQKIADFVSKTPFIHSSFSELCKSEVYLKNE  
 NQITGAYKIRGAYNKIANLDLEAKKAGVIAASAGNHAQGVSAKFKGTAIIVMPEST  
 PLLKVSATKNLDAEVIKGDNFDEAYAFATNYAKENGLSFIHPFEDELVMAGQGTLML  
 EMLDDISDLDTIIPVGGGLISGIASAAKQINPNIKIIAVGAKGAPAMHDSFKAKEV  
 KNSKSVRTIADGIAVRDANPINLGIILKCVDEFVQVDDEEIANAVLFLLEKHKIIVEG  
 AGAASVAALLHQKIDIKNSKKIGVVLSSGGNIDVQMLNIIIEKGLFKAYRKMQINVTLI  
 DKPGALLNLTDSLKSANANIVKIDYDRFSTKLDYGDAMISITLETGKGEHQEVRNII

gene KDKGDFYETF"  
complement(18458..18916)  
/gene="yccU"  
/locus\_tag="DMACINML\_01591"

CDS complement(18458..18916)  
/gene="yccU"  
/locus\_tag="DMACINML\_01591"  
/inference="ab initio prediction:Prodigal:2.6"  
/inference="similar to AA sequence:RefSeq:CKG80094.1"  
/codon\_start=1  
/transl\_table=11  
/product="CoA binding domain containing protein"  
/protein\_id="Prokka:DMACINML\_01591"  
/translation="MIKFLKFLYKVTMDENLIIDKILNNTKTIAIVGLSPDESKPSF  
MIGQFLQENNYKIYPIYPKCEILGERVYRSLDDIDEKIDLVLVFRKGEFASLLPSI  
IQKGIQNFWLQLGICNNEVAKECEKLIKINFIQDKCIMRELPLYQDRINKC"

gene 19042..19452  
/locus\_tag="DMACINML\_01592"

CDS 19042..19452  
/locus\_tag="DMACINML\_01592"  
/inference="ab initio prediction:Prodigal:2.6"  
/inference="similar to AA sequence:RefSeq:CAL34958.1"  
/codon\_start=1  
/transl\_table=11  
/product="putative integral membrane protein"  
/protein\_id="Prokka:DMACINML\_01592"  
/translation="MAQAYPCILIIHLICAIFFVGYLFVDIFILNTIKRKNPNFDKNL  
FSSVGKIMPFIVLLFLSGGAMISFHLNPLNLIIFLIKILAFSILSLVVFSLFFHFV  
LKRKNPLTRFIHPFVFLCIVIVILAKLMNYYFL"

gene complement(19470..20552)  
/gene="trmA"

CDS complement(19470..20552)  
/gene="trmA"  
/locus\_tag="DMACINML\_01593"  
/EC\_number="2.1.1.35"  
/inference="ab initio prediction:Prodigal:2.6"  
/inference="similar to AA sequence:RefSeq:CAL34959.1"  
/codon\_start=1  
/transl\_table=11  
/product="tRNA (uracil-5-)-methyltransferase"  
/protein\_id="Prokka:DMACINML\_01593"  
/translation="MSLQEFGNFSNLEEKAFKFFKDFYQGNLYELFSSKDKHYRTR  
AELSFYHDKDEIYYAMFKNKKKIIIESLDFADEKITAFMPKLLKQIRSNVNLKEKLF  
VEFLATKNELSTLLYHKNIELICDDLNNLSLELDANLIARSKGKLVFKKENLRQEL  
DIQGRKIFYEFNDCFIQPNTSINEKMITWVCENLQAQERKDLLELYCGYGNFTLALA  
IFFDKVLATEISKSNINFALLNCKINNISNIHFTRLSSEELSQALKKEREFFRLKIDID  
LDFNFVSHILVDPFRAGLDKSVIDLKKNYENIYISCNPISLKENLKELSLTHRVEKF  
ALFDQFVNTPHLECGVLLKSLHSKQS"

gene complement(20549..22279)  
/locus\_tag="DMACINML\_01594"

CDS complement(20549..22279)  
/locus\_tag="DMACINML\_01594"  
/inference="ab initio prediction:Prodigal:2.6"

```

/inference="similar to AA sequence:RefSeq:CAL34960.1"
/codon_start=1
/transl_table=11
/product="putative Na+/H+ antiporter family protein"
/protein_id="Prokka:DMACINML_01594"
/translation="MRFLIFFLLPLIAFANTHQATANANLFGVFTLIPPLVAITLAFI
TKDVILSLFAGVLSGTFLLSLASNIFQADSLSFHFYNTAIDSFSKIISYILESTSDP
VNAGIILQILCIGGLVALITKMGGAKAVALKFAKRAKSAVSAQVNTWFLGLLIFFDDY
ANLLIVGPIMRPLADKFKISREKFAFVIDSTAAPVAGIAVISTWIGLEVSLIKNAYED
IGISNISAFGVFVETIPYRFYNIFFMLFFVLMTALMGREFGPMKAEIRARTTGQIAPL
PKSGTLDTAEFEDQFLAPKEGIKIRALDATIPILTIIILAILGFYFNGLSTLKGEELI
KANANPLSFETFRLAFGNANSSVVLFQAALFAAIVAIFIGVYRKIFNFKEAVETWIYG
WKTMIFTIVLLFAWSLSSIVKELGTPEFISSLLADKLPEFILPATIFAFASVISFAI
GTSYGTMGILMPLAVPLAYKVAQINAMDMDAIHHYMVINISCVLTGAIFGNHCSPISD
NVILSSMSAKCDHMEHVRTQIPYALFICVISL FAGYIPVSLGLSVLVLPLNLILIAF
LLRIIGKKVS"
sig_peptide complement(22211..22279)
/locus_tag="DMACINML_01594"
/inference="ab initio prediction:SignalP:4.1"
/note="predicted cleavage at residue 23"
gene complement(22276..23025)
/locus_tag="DMACINML_01595"
CDS complement(22276..23025)
/locus_tag="DMACINML_01595"
/inference="ab initio prediction:Prodigal:2.6"
/inference="similar to AA sequence:RefSeq:CAL34961.1"
/codon_start=1
/transl_table=11
/product="putative oxidoreductase"
/protein_id="Prokka:DMACINML_01595"
/translation="MKTAFITGASSGFGYACVEAFIQEGYKVIALLARRKDRLELKAK
YKDQIHILCLDVRKQEEIFNAVENLPNEFKEIDVLFNNAGLALGIDFDKLSIEDIDT
MVDTNIKGLLYVAKAIIPTLRKQKSAYIFNLGSVAAKNPYFGGNVYCGTKAFVGGQFSR
ALRNDLRGENIKVTNIAPGLCKTEFSEVRFKGDKAKADAVYEGTQYISAQDIKVVMS
IINLPSHINVNEIELMPVTQTWNGFYIEQNQ"
gene complement(23022..24263)
/locus_tag="DMACINML_01596"
CDS complement(23022..24263)
/locus_tag="DMACINML_01596"
/inference="ab initio prediction:Prodigal:2.6"
/inference="similar to AA sequence:RefSeq:AHK52048.1"
/codon_start=1
/transl_table=11
/product="ankyrin"
/protein_id="Prokka:DMACINML_01596"
/translation="MRLLFVL FCCFLGLKAENSITCDYIKNKAQIFQDSPKQDYLDI
ASTCDFSLKNQAFTRLYQLANEIRGGNAACSGVEYFPKLQQDFLLKISIDPIEQ
KGLDTPENLEKKYTLRSYFRYWAYQSIGNFRLYQEFWQYENNAIEPLEQYFENNFKF
DKGSDIYYTTNALNEFLNWAVGETKIHKDISPLAKVLSNKNHSISYIQDFIYSNNLNR
DELTIGLQAALLKQRSKDILNLLIRLGARIDEGYENALFYALESYDNTKFLLELGLNV
NSANTFGKTPLFYAIEFQRKDIVSLLL EYGADV NKKYINDNEKLALSANIGGNTPYFI
TFCAL EHTSKNVLMHAAAYGDVEILKMLIAKGANINEVDDLGFNALDFALAANKKDNA
DYLQSLGLKANENLIYGGSL E"
gene complement(24322..26868)

```

CDS  
 /gene="acnB"  
 /locus\_tag="DMACINML\_01597"  
 complement(24322..26868)  
 /gene="acnB"  
 /locus\_tag="DMACINML\_01597"  
 /EC\_number="4.2.1.3"  
 /inference="ab initio prediction:Prodigal:2.6"  
 /inference="similar to AA sequence:RefSeq:CAL34963.1"  
 /codon\_start=1  
 /transl\_table=11  
 /product="aconitate hydratase"  
 /protein\_id="Prokka:DMACINML\_01597"  
 /translation="MSFMQDYNKLV EERAALGIPPLPLNAEQTKELCELLKTQNDEKL  
 VSLLQNRVNPVGDDAALIKCEFLDGILKNKIQAPAIKDLKMLKMLTMLGGYNVKVLI  
 DALKDESIASDAAEVLKNIIFVHDNFHTVAELSKSNKHAKAVLESWANADWFNKKEKL  
 PQVIQCVFKVAGETNTDDLSPAGDAFTRSDIPLHANAMLKVRQAGSLEKIKELKKS  
 REVVYVGDVGTGSSRKSAINS IQWHLGKEIDGVPNKHSGGIVMGSTIAPIFFNTAQD  
 SGALPIICDVSNLEMGDEF EIHYPYEGKIIKNGSVIAEFKLSPTILDEV RAGGRIPLI  
 IGRGLCAKAREFLGMENENIFTKPEQPEASSGGYTLAQKMLGRACGVEGVRPGMYIEP  
 RTLTVGSQDTTGPMTRDEIKELASLGFNADFVMQSFCHTAAYPKVSDSNLHKTLPNFM  
 TSRGGVSLKPGDGVH SWLNRFVLPDVTGTTGGDSHTRFP IGISFPAGSGLVAF AAVTG  
 SMPLNVPESVLRFSGELQAGVTLRDLVNAIPYYAIKQGQLTVEKKNKNIFAGKILE  
 IEGLPNLKVEQAFELSDASAERSAAACSV DLSIESVSEYIKSNISLIEAMIEAGYEDK  
 ATLARRADKMKEWLKNPTLLRADKDAKYAYIIDINLNDIKEPILACPNDPDDVATLSE  
 ILADANRPKNIDEV FVGSCMTNIGHYRALGEILKDKGMLKTRLWVVPPTKMDKAQLTK  
 EGYYSIFGSAGARIEVPGCSLCMGNQARVNDGAVVFSTSTRNFDNRMGMGAKVYLGSA  
 ELAAVCAILGKIPSKEEYLQIVSDKLS DAHKANIYKYLNFNEIDNFKLDN"

gene  
 26923..27399  
 /gene="ogt"

CDS  
 26923..27399  
 /gene="ogt"  
 /locus\_tag="DMACINML\_01598"  
 /EC\_number="2.1.1.63"  
 /inference="ab initio prediction:Prodigal:2.6"  
 /inference="similar to AA sequence:RefSeq:CAL34964.1"  
 /codon\_start=1  
 /transl\_table=11  
 /product="methylated-DNA--protein-cysteine  
 methyltransferase"  
 /protein\_id="Prokka:DMACINML\_01598"  
 /translation="MFKVYYKIPFCYLSLHNGDFLTKIDFCDR LGIENTCPLLEFAK  
 EELSLYFAKKLQKFQTP LWIQGSEFEQKVYKELINIPYAKLVTYKEIAININHPKAFR  
 AVGNANSKNLIPIFIPCHR VVASNGLGGYNGGLAIKRFLLECEGVDLSQFKNKLG D"

gene  
 complement(27372..28319)  
 /locus\_tag="DMACINML\_01599"

CDS  
 complement(27372..28319)  
 /locus\_tag="DMACINML\_01599"  
 /inference="ab initio prediction:Prodigal:2.6"  
 /inference="similar to AA sequence:RefSeq:CAL34965.1"  
 /note="conserved hypothetical protein Cj0837c"  
 /codon\_start=1  
 /transl\_table=11  
 /product="hypothetical protein"

```

/protein_id="Prokka:DMACINML_01599"
/translation="MNISNLSELIHANMLNEGSVLSVTGFALSHELKNGFAFFSNNQ
KEIIQAVQKGAFATISEHELCIDDKEIYYLQVDNLESALTKLLRFLCEEKECEFLALQ
AYELGICKAFSLNILKGNIFVDFNSLIKAKKGEIFCFSDENYLLQICASLTVLKEANF
TLLSRSSFFFTTLVCDNLYFKNLNLPFIYAKIFAKIMFYLKEKNTKMSFDFNKIDDFK
IYFMDENFNISEFGSSARAFIIVSNQNTDFWQENFKNIKGFKTALHNSLFCDFSQDK
LLDLKLNLFKYCLLLEDYEAFEREFKNEENQSPSLFLN"
gene complement(28321..30207)
/locus_tag="DMACINML_01600"
CDS complement(28321..30207)
/locus_tag="DMACINML_01600"
/EC_number="6.1.1.10"
/inference="ab initio prediction:Prodigal:2.6"
/inference="similar to AA sequence:RefSeq:CAL34966.1"
/codon_start=1
/transl_table=11
/product="methionyl-tRNA synthetase"
/protein_id="Prokka:DMACINML_01600"
/translation="MRYLTTPIIYVNDVPHLGHAYTTIIADTLARFYRLQGHETRLLT
GTDEHGQKIEQAAKIRNSTPKEYADKISSEFKKLWDEFEITYDIYARTTDARHVDFVK
AMFLKMWQKGDYKDEYEGHYCISCESFFAKSQLINECGPCDCGKDTSLKKEESYFFK
LSKYQDKILQWYDKEDPILPKNKKNELINFVQSGLKDLSITRTSFDWGIKIPKIEIKDD
KHIIYVWLDALFIYISSLDYQSQGENAKFWPAHIHLVGGKILRFHAIYWPFLMSVDL
PLPKFIGAHGWWTKEGKMSKSKGNVVKPEVVDAYGLEAFRYFLLREVFPFGNDGDFS
ESVLINRINTELGNEFGNLLNRIIGMSIKYNQGNISQEGVLEFYKNELDTAKEHLDS
INFLENLQCNRYLEELFKALSANLAISKYEPWNLKANKTKEANALIGLCANILAKT
SLLLSPKSCQKQVGLALNFEISPTNYQKLILQNELLDFTNACEALFPKIEKPLLS
QEEKQEVKKEEKPKVKIDDFAKIEIKVAKVIDCQNIQEGSEKLLKFKLELDNKEIRQVL
SGIAKYYKASDLIGKQVCVISNLKAKIFGHESDGMILSAKSGDKLVLSPEQLVENG
SLVG"
gene complement(30217..30414)
/locus_tag="DMACINML_01601"
CDS complement(30217..30414)
/locus_tag="DMACINML_01601"
/inference="ab initio prediction:Prodigal:2.6"
/inference="similar to AA sequence:RefSeq:CAL34967.1"
/note="hypothetical protein Cj0839c"
/codon_start=1
/transl_table=11
/product="hypothetical protein"
/protein_id="Prokka:DMACINML_01601"
/translation="MSEIRDEFEQDLKKEILSSCQSSKGLKSCYNCDEIFNCSTRK
DYVDAVYNSMSKKGTEGGFDF"
gene complement(30407..31249)
/locus_tag="DMACINML_01602"
CDS complement(30407..31249)
/locus_tag="DMACINML_01602"
/EC_number="3.1.3.11"
/inference="ab initio prediction:Prodigal:2.6"
/inference="similar to AA sequence:RefSeq:CAL34968.1"

```

```

/codon_start=1
/transl_table=11
/product="fructose-1,6-bisphosphatase"
/protein_id="Prokka:DMACINML_01602"
/translation="MQELISYIQKAVIEISNALKFPDTSYSQONQNSTGDTQLKFDVLS
DEIITNTLSQCPSIKAIISEEKDEILNINENAKFVVAYDPLDGSSLMVNFAGSIFA
IYEEKASAKNLKAALYSMYGARLELVICEDKPKLYRLDKNDKFAFVKELQMKEGKIN
ATGGTQKFWEKHAFFIKKLFDEGYRLRYSGAMVSDINQILLKGGGLFSYPATSDAPK
GKLRAFFEVFPLAFIIEKAGGKTTNGKNHSLLELDFDEIHATTPCFFGSKYEISELLK
AYNE"
gene      complement(31251..31745)
          /gene="mobB"
          /locus_tag="DMACINML_01603"
CDS      complement(31251..31745)
          /gene="mobB"
          /locus_tag="DMACINML_01603"
          /inference="ab initio prediction:Prodigal:2.6"
          /inference="similar to AA sequence:RefSeq:CAL34969.1"
          /codon_start=1
          /transl_table=11
          /product="putative molybdopterin-guanine dinucleotide
          biosynthesis protein"
          /protein_id="Prokka:DMACINML_01603"
          /translation="MKKSIIAFSGPSNSGKTTLITKIANEFIKQNLKVLIIKHDPADK
          AQFDVYGKDSFKFFQSGAEVMVLSPTRTTFFSHEKRDILSALKIAPDFDLCLVEGLKT
          LDLPRISVFYKEIDESYFAFSNAIASYKIDSYPNLTWLDDLNDVQGICNYILKNAKNL
          QGEL"
gene      31838..32323
          /locus_tag="DMACINML_01604"
CDS      31838..32323
          /locus_tag="DMACINML_01604"
          /inference="ab initio prediction:Prodigal:2.6"
          /inference="similar to AA sequence:RefSeq:CAL34970.1"
          /codon_start=1
          /transl_table=11
          /product="putative lipoprotein"
          /protein_id="Prokka:DMACINML_01604"
          /translation="MKIYTLALAMLVFSACSLKEEAIVDANLKTQTLMFAQKYKITQD
          KLNAIITMSYLNPILDKASQDDIFALTITPDTLKIENLEIFINERKAKIEELDEEFFK
          YLIQNRYTQYLKISLPSVKEEGKITAKICLNQLPCFELNFQKYPKSLYYRSEDVDTQY
          N"
gene      complement(32220..33848)
          /locus_tag="DMACINML_01605"
CDS      complement(32220..33848)
          /locus_tag="DMACINML_01605"
          /inference="ab initio prediction:Prodigal:2.6"
          /inference="similar to AA sequence:RefSeq:CAL34971.1"
          /codon_start=1
          /transl_table=11
          /product="putative secreted transglycosylase"
          /protein_id="Prokka:DMACINML_01605"
          /translation="MRKIFILLSLSLAFNAKQYNLERLKQEENSIKADYYIYRLLN
          KVISKKEAEGLNSHIFRYVGKIKSELEKIIIPVKIFIDPKYAPCYNITKANILDANQTC
          QSVRLNSIAFIASLDNASRSALAQKLSHQRGDLANLLLAFNTPEPMAYIIQKEDVNGF

```



```

FRLRNYSKKYDFDLNASFANKLPTHVGFKNFAQNIIKKENPKFRASMLKIDPTFVNE
DSAFYLGINALAYNKEELAYNFFAKAAQTFKMQSNKDNAIFWMMWMIKKDDKDLQTLAK
SSSLNIYSLYAKELTNSEFLKIEVIDSTNKKKNNFMQDPFAWQKLNKQIREANASEL
DRLAKEFDSKETLPIYAYILERKSKFKNHYFIMPYYEYIKDYSTPRQALILAIARQES
RFIPTAISVSYALGMMQFMPFLANYIGEKEKIPNFDQDFMFEPKNAYYFGNHHLNLYL
EKHLDSPLFIAYAYNGGIGFTKRMLARDDMFKQKGFEPFLSMEFVPYQESRIYGKKVL
ANYIVYRRLNDSIRISDIFENLTRNKVAGSNKS"
gene      complement(33845..34126)
          /locus_tag="DMACINML_01606"
CDS      complement(33845..34126)
          /locus_tag="DMACINML_01606"
          /inference="ab initio prediction:Prodigal:2.6"
          /inference="similar to AA sequence:RefSeq:CAL34972.1"
          /codon_start=1
          /transl_table=11
          /product="putative integral membrane protein"
          /protein_id="Prokka:DMACINML_01606"
          /translation="MVVDSLIIISIFQVIQIIINIYTWIIITALLSWVNPDPYNPIVQ
ILYKLSSPAYALVRKIPTRIGSIDLAPLIIVLALQFLSIFLGNILRSLL"
gene      complement(34130..35425)
          /gene="gltX"
          /locus_tag="DMACINML_01607"
CDS      complement(34130..35425)
          /gene="gltX"
          /locus_tag="DMACINML_01607"
          /EC_number="6.1.1.17"
          /inference="ab initio prediction:Prodigal:2.6"
          /inference="similar to AA sequence:RefSeq:CAL34973.1"
          /codon_start=1
          /transl_table=11
          /product="glutamyl-tRNA synthetase"
          /protein_id="Prokka:DMACINML_01607"
          /translation="MYRFAPSPTGDMHIGNLRAALFNYICARQKNMDFILRIEDTKA
RNIIGKEEIKEILHLFGISWQHYYVQSENLFHRQMALKLVSEKKAFACFCTEEELE
AKKELAKKQKAYRYDGTQCQNLADIDVLECEKPFVIRLKKPHTMTKFTDFVKGELSFE
PENIDSFVIMRTDKTPTYNFACAVDDMLENVSCIIRGEDHVSNTPKQEHIRASLGYDK
AMTYAHLPIILNEEGVKMSKREAHSSVKWLLLESGILPSAIANYLIMLGNKTPREIFTL
EEAIEWFDIGKISKAPARFDLKKLLQINREHIKLMTDEELNTALNLNKDLAQLAKFYT
QEASTIKEIKEKLEAIFGAKDFNEFESECKILKDLLSQIEPFESYEEFKSYLLEKSQL
KGKKFFMPLRIILTGNTHGPELSDLYPYIKNYINELARI"
gene      35510..36634
          /locus_tag="DMACINML_01608"
CDS      35510..36634
          /locus_tag="DMACINML_01608"
          /inference="ab initio prediction:Prodigal:2.6"
          /inference="similar to AA sequence:RefSeq:CAL34974.1"
          /codon_start=1
          /transl_table=11
          /product="putative metallophosphoesterase"
          /protein_id="Prokka:DMACINML_01608"
          /translation="MIFFI FSVTLLIFGLANIYIYKRLIKKIFIFKYLYKIFAFVFT
LLYLAQAIIFLIFRRNEYLSDTWYEFLLAALYPTYCLFFITLALDFIRLILMLMGKTHI
KYNLTLRSLDFFAIITLAAVSIYTSINNAIRVPEIQSVDIQLAKLDRDLKIAMLTDIH
LGKNLHKDFLDKLIVEVNLQKPDMMVIVGDLVDTNPKELQNYISRLNDLNSTYGTFFYA

```

LGNHEYHGGIEEVLDLLKKYTNMKILLNQNLDLGFINIAGLDLAGLSKGLYAPDLAR  
 VKVDLNTSKPSILLAHQPKTALLYDLSDFDLVLSGHTHGGQIFPFMFLVKLQQGFIRG  
 LYNLGENTKLFVSSGAGFWGPSLRVFAPNEIAILNLKGEK"

gene 36631..37431  
 /gene="psd"  
 /locus\_tag="DMACINML\_01609"

CDS 36631..37431  
 /gene="psd"  
 /locus\_tag="DMACINML\_01609"  
 /EC\_number="4.1.1.65"  
 /inference="ab initio prediction:Prodigal:2.6"  
 /inference="similar to AA sequence:RefSeq:CAL34975.1"  
 /codon\_start=1  
 /transl\_table=11  
 /product="phosphatidylserine decarboxylase proenzyme"  
 /protein\_id="Prokka:DMACINML\_01609"  
 /translation="MSFSNESSRIFGLIAGIKFPSFIQKIINEKYVNYFKIDMSEFKA  
 PYEYESLNALFTRSLQIPREINEGFISPSDGKILECGSAFLADNTPFAFSIKGHTYSI  
 EELLKDSFKKEELENGLDYVNIYLSPRDYHRYHSPCDMQILSATYTSALYSVNEKHL  
 ERISNLYVKNERVSLKQNDKGFVWLVFVGAQNVGKMRFKFDASIQTNAKFSHNFTRK  
 YDNLELKKGEELGNFELGSTIVLISQKGLLDIKLKAGQNVKFGKEKIAD"

gene complement(37428..37709)  
 /locus\_tag="DMACINML\_01610"

CDS complement(37428..37709)  
 /locus\_tag="DMACINML\_01610"  
 /inference="ab initio prediction:Prodigal:2.6"  
 /inference="similar to AA sequence:RefSeq:CAL34976.1"  
 /note="conserved hypothetical protein Cj0848c"  
 /codon\_start=1  
 /transl\_table=11  
 /product="hypothetical protein"  
 /protein\_id="Prokka:DMACINML\_01610"  
 /translation="MSKIKKSIKKAVALGYQKEKHSAPKVLASGKGESA AKIISLAKE  
 HGVPIKEDDLIEILSKLDLGD EIPP NMYKAVA EVFAFIYQMANKTPKN"

gene complement(37706..40030)  
 /locus\_tag="DMACINML\_01611"

CDS complement(37706..40030)  
 /locus\_tag="DMACINML\_01611"  
 /inference="ab initio prediction:Prodigal:2.6"  
 /inference="similar to AA sequence:RefSeq:ADN91027.1"  
 /codon\_start=1  
 /transl\_table=11  
 /product="hypothetical protein"  
 /protein\_id="Prokka:DMACINML\_01611"  
 /translation="MINTQLTSQIANAQKNDIKTDSGISKDKLNSKDNPKESLSQALK  
 QNLGLNKNASDEEVLTRLVQNETSTKLKELVNKLLDQINAQKNPDPMLKQGKTLNLA  
 PNFANELKVLSTELAKSDTFTQVLDKLNQILKPASEIKNSNLAPLLKNSGIFFEAKLK  
 DALNEELLPKSFHSLISTIKSLSSEKLNQIAQLANANLSPKDTLKEKLNIISSNKNE  
 NKQILNQSSFKALLNLSSKLENFKNYIAKNPSHTQEKILPIASKIAKELSAIKNDFFK  
 ALNRPENLMIKDKLLKQSAWAFKLENTLKNILGDHFPKTPQKESILESLLNSKENI  
 KNEPIKNENIKEDAKTQKEDIVKHDEYTEEESPNSNIKKGESEKPTQTPKKENVLDD  
 NDVDVKQDIKKE TNLESQEDFHLKEDQNLDSKTENRKDNTQDSKNKTEENQAENNTKN  
 STSNQDKIKDEKQEKIKENIAKENPKFYETKTENKTSTNTHNPNNNPSNTQNTNPNQN  
 TQQLNNQTTQNI IKNQEFIKQNIVKNLAFSVENLDLEQVQDLSKLSLNSRKLNESLK

ELEPHTQNAKLNQAELKTLLEHKLNLSIKDLAQIKPKTEQDIAESLHHDVKSTLLQISN  
LAKNEGNEAVYNQANRLLAQIELNQLMSLANDSINTYLPFSWEDLDDSKIMFRRGKKD  
KFFAQIKLEFAKLGDLLEILISLNNEKYIDINIMAENVEFRKTIYENAEHELKRNINKAG  
LLSANFFVGDIIIRSKFDTRNAKNLDLEMGMDKKV"

gene complement(40023..41183)  
/locus\_tag="DMACINML\_01612"

CDS complement(40023..41183)  
/locus\_tag="DMACINML\_01612"  
/inference="ab initio prediction:Prodigal:2.6"  
/inference="similar to AA sequence:RefSeq:CAL34978.1"  
/codon\_start=1  
/transl\_table=11  
/product="putative MFS (Major Facilitator Superfamily)  
transport protein"  
/protein\_id="Prokka:DMACINML\_01612"  
/translation="MTALFASMTFLFAGNALIVSSIGVILKENKESLAVGVVSSCF  
IGALIGTIGAHKIIISRIGHIRSFGLFGAVFGISAMLHTLSENLVFWAVLRFFIGICY  
GLLMVIESWLNEKSKNAVRSRILGFYEIVFYLAFGIGILIIALDLSKHNFILSAALI  
LLSSLPLNLIKIKEPVLPAFSPISIPKIFDIAPLAIVTSFIAGMLINGFFSMASLFIL  
LQGFQAQEVSYFMFCGVLGGFLAQIVVGSISDKMGRKFAITCSSIGFFTMLIFAFFK  
PYLYIQYFLGILLGIGVFCLYALALARANDMLTNKNQGVELGRGVLCYSLGSLFGPL  
ILGFLIQYFNTNGFVWFYITSLGFLILFAVNKPNILNKKFKKKPGNMVMLDD"

gene complement(41188..41691)  
/locus\_tag="DMACINML\_01613"

CDS complement(41188..41691)  
/locus\_tag="DMACINML\_01613"  
/inference="ab initio prediction:Prodigal:2.6"  
/inference="similar to AA sequence:RefSeq:CAL34979.1"  
/codon\_start=1  
/transl\_table=11  
/product="putative integral membrane protein"  
/protein\_id="Prokka:DMACINML\_01613"  
/translation="MENKKAFFIILCLIHILFYCILVIFKWINLNIILSYEFAFFSIL  
LIVFTSYFNKFNILTQAKNHQKDFIYPNLFCKIKKIKKLPRIVKFIPIKDDLTLNFKD  
RLRFFTLFFALFKLIAYGILVAGFLFLHHQDKLDILSYICGISSLLVCVFIFMLYIRR  
YESKKNH"

gene complement(41681..42001)  
/locus\_tag="DMACINML\_01614"

CDS complement(41681..42001)  
/locus\_tag="DMACINML\_01614"  
/inference="ab initio prediction:Prodigal:2.6"  
/inference="similar to AA sequence:RefSeq:CAL34980.1"  
/codon\_start=1  
/transl\_table=11  
/product="putative integral membrane protein"  
/protein\_id="Prokka:DMACINML\_01614"  
/translation="MSKNSNHTFSNKRQKIIRKTI EAADGLSLGISMVVAILIGIGVG  
YLLKKFTYPWFLWLGVFWGVAAILNVYKAYKAQVKS YGEFEQRDEFI KEKIRQKEQ  
NNGK"

gene complement(41998..43272)  
/gene="hemL"  
/locus\_tag="DMACINML\_01615"

CDS complement(41998..43272)  
/gene="hemL"

```

/locus_tag="DMACINML_01615"
/EC_number="5.4.3.8"
/inference="ab initio prediction:Prodigal:2.6"
/inference="similar to AA sequence:RefSeq:CAL34981.1"
/codon_start=1
/transl_table=11
/product="glutamate-1-semialdehyde 2,1-aminomutase"
/protein_id="Prokka:DMACINML_01615"
/translation="MTNKKAFKTACNLIAGGVNSPVRAFANVQSEPRFISHGKGAYIF
DIEGNGYIDYVQSWGPLLFGHCDKDILKACNEALKKGSSFGAPTLLETQLAELVLEDF
PHLDKIRFVSSGTEATMSAIRLARGFTKKDKILKFEGCYHGHSDSLLVSAGSGAATFN
SPSSLGVLADVAKHTLVATYNDIESVKELFEKNKDIACVIEPIAGNMGLVPGKQDFL
EELAKICKENDTLLIFDEVMSGYRASYLGSYGINHIQADIVTFGKVI GGGLPAAAFAA
RAEIMDILSPLGGVYQAGTLSGNPLAMAAGIASLSKAKKKKDLTYKLGKLA KKLTKGM
KELANERGIALQTCYVGSFMGYFFTQDPVYNYKDALKSDLKLF SKFHQNMLKNGIYLA
PSQFETGFICAKMNKEHIDKTLQSTYESFKKL"
gene complement(43269..43616)
CDS /locus_tag="DMACINML_01616"
complement(43269..43616)
/locus_tag="DMACINML_01616"
/inference="ab initio prediction:Prodigal:2.6"
/inference="similar to AA sequence:RefSeq:CAL34982.1"
/codon_start=1
/transl_table=11
/product="putative periplasmic protein"
/protein_id="Prokka:DMACINML_01616"
/translation="MKAVLIFLGAILNLFASDFITLKEYSKMLYENPRGISCKKCHGS
DGSEQILGFYMKNGVKTAYKVPSIQNLSFEFRTSLNQS KDAKSIMPNYSLTNDEIIT
LYNYIKQSKKEQK"
gene 43694..44551
/gene="fold"
CDS /locus_tag="DMACINML_01617"
43694..44551
/gene="fold"
/locus_tag="DMACINML_01617"
/EC_number="1.5.1.5"
/inference="ab initio prediction:Prodigal:2.6"
/inference="similar to AA sequence:RefSeq:CAL34983.1"
/codon_start=1
/transl_table=11
/product="methylenetetrahydrofolate
dehydrogenase/methenyltetrahydrofolate cyclohydrolase"
/protein_id="Prokka:DMACINML_01617"
/translation="MTLLDGKALS AKIKQELKEKNKILKENG VQTCLAVILVGN DPAS
QTYVNSKAKACEECDIKSLVYRLDENTTQNEL LALINTLNHDDSVHGILVQLPLPKHI
SKNLILESISSKDVDGFHPINVGYNLGL ESGFLPCTPLGVMKLLKAYDINLEGLDS
VWIGASNIVGRPMATMLLNAGCTVSICHIKTKDL SAYTKKADLIIVAAGCVNLLRADM
VKEGAIIDVGINRLENGKIVGDVDFEEVSKKASFITPVPGGVGPMTIAMLLENTVKS
AKNSLKSGI"
gene 44552..45400
/gene="lepB"
CDS /locus_tag="DMACINML_01618"
44552..45400
/gene="lepB"

```

```

/locus_tag="DMACINML_01618"
/EC_number="3.4.21.89"
/inference="ab initio prediction:Prodigal:2.6"
/inference="similar to AA sequence:RefSeq:ABS43476.1"
/codon_start=1
/transl_table=11
/product="signal peptidase I"
/protein_id="Prokka:DMACINML_01618"
/translation="MNFFKKLYKFSQSWTGTVVIVLLVIFFFIQAFVIPSGSMKNTLL
VGDFLFVKKFSYGIPTPHIPWLEIPVLPDFDKDGHLLIKGQSPQRGDIVVFRNPKNEKE
HFVKRCVGVGGDRIVYANKTLYVRMHEGDEFMKEHYPNDLATLGGQIYVKEPYKQKGI
HYDLNKDIEGDILRFLSIGEFAMSPTYFKELGNNIGFSGNAYVFDVAEEYFMVGDN
RDYSYDSRFWGSVPYRLIVGKPFVYFSDQDKNVRWERIGRFVDTLENEEYIHDYD
DEDKLS"
gene complement(45450..45794)
/locus_tag="DMACINML_01619"
CDS complement(45450..45794)
/locus_tag="DMACINML_01619"
/inference="ab initio prediction:Prodigal:2.6"
/inference="similar to AA sequence:RefSeq:CAL34473.1"
/codon_start=1
/transl_table=11
/product="peroxide stress regulator"
/protein_id="Prokka:DMACINML_01619"
/translation="MEALELLKKHDIATNLRIELLQILSLAKAPLSYDNFNKANKT
SFYRNMELEFKGIVSKSELNRKSFYELADHAKAHFVCDMCHKISDVQMPKVKGTIKS
VLIKGICSDCEK"
gene 45930..46808
/locus_tag="DMACINML_01620"
CDS 45930..46808
/locus_tag="DMACINML_01620"
/inference="ab initio prediction:Prodigal:2.6"
/inference="similar to AA sequence:RefSeq:CAL34314.1"
/codon_start=1
/transl_table=11
/product="putative periplasmic solute binding protein for
ABC transport system"
/protein_id="Prokka:DMACINML_01620"
/translation="MLRILLLSVLCVFAFGKPIISVSIPPQAFFVEKIAKDSVEINIL
IPPNSDEHTMEFKPQALKKLEQSKIYFLADLELEKILGEKFSVLKNVKIVNINEGIH
LLEGGHDHKHEHDHDHDHGHAE EYDEHNDPHVWLDPILVKKLAQNITQALVQSFP
NNKEFYEANLANFLKELDQMDAQIAEKLKNIKRNEFIVYHPSWAYLAKRYNLVQIPVE
IDGKEPKSKDLQNLIKLAKEKDIRVIFVQPGFPENSAKVLAKELNAQIVSINHLARNW
DEELLKSIQALSSALQ"
gene 46805..48127
/locus_tag="DMACINML_01621"
CDS 46805..48127
/locus_tag="DMACINML_01621"
/inference="ab initio prediction:Prodigal:2.6"
/codon_start=1
/transl_table=11
/product="hypothetical protein"

```

```

/protein_id="Prokka:DMACINML_01621"
/translation="MRAIFVLIFLALSPLYSCALCATYTPNVNVNLDNFNISNDKIKQV
DISWEFSEEFFNVLLFNDFNYNDKFDPELEIVKYTLDDYIKPKHFLTQFSFNGLEE
NINIKQFKNPKLHIQSPRLLFSYQVVLDMPIKDNNTFSVKIHDDGGFFNFNIINQNSI
SLNSQNYIISIDSNTASFEMYQGQLPQDVYIDKPTSSLSKNFLEKLIENNTLFAH
IKDILRKEFDKSFVLLMISFAYGVFHASAPGHAKMLTSSYFLTHKSTPLKILYFVS
KIGVVHILSAFLLVSVGVVLEHLLKDVNNEAGFVLTKITSLFIIIFIALFMISKKILS
DKKQCCCTHHKSNEWGIILSAALVPCPGVLLIVFAYEFSFWYALSSALFITLGMSLV
LFAFALGANQFYKSISHIKIRIFLEYFGLIVMFLFGLFLFINIKTNVL"
sig_peptide 46805..46873
/locus_tag="DMACINML_01621"
/inference="ab initio prediction:SignalP:4.1"
/note="predicted cleavage at residue 23"
gene 48307..48972
/locus_tag="DMACINML_01622"
CDS 48307..48972
/locus_tag="DMACINML_01622"
/inference="ab initio prediction:Prodigal:2.6"
/codon_start=1
/transl_table=11
/product="hypothetical protein"
/protein_id="Prokka:DMACINML_01622"
/translation="MKIAMIIISLFLVFLSACAFKEKKASEIETLASNYGGIYIFDK
KIREEILENERKRTELENDKFRTKIGQLKSGELIYKIDSAVDKLLPQILSNGCKYY
RNDYNYDVKDPDYDFNFDDKPEFAYYEDQFKAYMGEENYKLRPYLGMTTYVCEGRK
YPVVFATMIDYKVKNYGLFGDEGRGFSFSSISRKSAGGGSFHYFTNGKFIKSDEKYTG
QSY"
sig_peptide 48307..48369
/locus_tag="DMACINML_01622"
/inference="ab initio prediction:SignalP:4.1"
/note="predicted cleavage at residue 21"
gene 49153..49716
/locus_tag="DMACINML_01623"
CDS 49153..49716
/locus_tag="DMACINML_01623"
/inference="ab initio prediction:Prodigal:2.6"
/codon_start=1
/transl_table=11
/product="hypothetical protein"
/protein_id="Prokka:DMACINML_01623"
/translation="MTYILLIIISTILSYLILKFIYKIIFKSKSVSKFLVFLGSIG
LIIFYYPYSYYLEPSFYKFKKEICKLDEPEIYQANGSKLDEEYNNKVLRYFDTDLDNMS
KIKTLRISDDKKHFSYWFKEKWIGDRISDFVIWFKNENATKDNIKKVSVYVWWRDLRP
LPAGNEGAGFYLSGDRENCAFYFKKEIK"

```

ORIGIN

```

1 ctctaaaata taaacaagta gatataagta atacttctac taatacagcc tatggttata
61 gtgtagataa agatggttat atgggaagtg attttaacaa agctgcagga ttgcctgaag
121 attttaagat acataaatct actttggacg agattaaana agctgctgaa aacgatcctg
181 ttgcttcaag tataaaagaa tacttaggcg taagcgagta ttataactaat atcgatatgg
241 ctgaaacat taaacaatac tacaatcttt tttctaatagc tttagaacaa agttttccaa
301 atgataaaac aagtttttagt gaagcagata taaattctat gcctaagggg tatgctataa
361 atggaataaa atcaatggac tttaatgatc caagcaatag aatgaatatac actcacctaa
421 gagatthttc aaattctttt attacaaata tttatcaaat ccctgaacaa atgaaagaag
481 ctgaaagttt atatatacaa tcaggatctt taatagatgg cataaatgga catagthttg

```

541 gtttatcttt ggaagaaatc aaaaatattt ctaaaggtga agattggcaa tttaatcctg  
601 atatgtcagt ttatccacaa aatgaagatg gaagctattc taaagaaact ttgtttatga  
661 gttttttaa atcatatggt agcggacaac ctgttgagag ttcagaaact acacttaatc  
721 caaaagtaga agcttacaat agggctatgg ctaaagaaag ttttaattggt gatagtattg  
781 ctttaaatga cattatgaca ggcaaatggg attttgcaag tttattaataa ggctatgcac  
841 aagagggttg gcttgacgca gatatatatg caatggataa aggggttaa tggcaaaata  
901 caagcatagg ttatggtgga gcttggtttg ataatcagtt taatcaagca aaagctaata  
961 gttggaaagc aagtagccaa agtataagatt cttatgttaa ttctataatg gatagactta  
1021 ataatctttt agggcagact agggtttaag ggttatggat aagtaggta aaaacttatt  
1081 tattaataat aaataaatca tttttgttt tattccaaat tggaaacaaat tttgcttgta  
1141 tgattttaat atatttagat tgaaggcaga aaaaatctaaa tcaaggaatt aatatgagta  
1201 tcttttagcat caatgataac tcaaactatg gttctatact ttcacaaagt aaagctaata  
1261 aagaaagtaa agaaaattct aaaataagtt ttgctaatagc ttttttaaaa caaaatgcta  
1321 gtaagttaa tgaaattcaa aatgcaaat cacaactct agcaagaagt gaagtattaa  
1381 acaatagttc aaattccact aatataatct attatttttc taaaacaagt tctcctaatt  
1441 atgatatac aagtgaattt aaaaactcta tttatacttt aaaatataaa caagtagatt  
1501 taagcactga tacagcctat gggttatagtg tagataaaga tggttatatg ggaagtgatt  
1561 ttaacaaagc tgcaggatta cctgaagatt ttaagataca taaatctact ttagatgaga  
1621 ttcaagata taatgagaat agttattttt ttgcagataa aaaagaatat ttagggatta  
1681 gcggttaatta ttttacaac atagatatgg cagataccat taaacaatat tataatcaat  
1741 ttaatcaaat tataaatcat acttttaatg ataccaataa aacaagtttt agtgaagcag  
1801 atttaaatag tttgcctaaa ggatatagtg tatctgatac aaataaagat tttgcttcac  
1861 ttgaaagatt agatacacia accataacia attattacia cacccaagaa caatacagtg  
1921 aaatggaaca attgggaacg attgcaagta ttagcttagg attacagcca ttagatttta  
1981 ctctcagag catgcaaact caaaatttag atcaagacag tgcaagagat acttttaatc  
2041 ctgatatgtc attttatcca aaaaatgaag atggaactta tactaaagaa gatttattta  
2101 tgagtttttt aaaagcttct ggcggaagag ttttagcagg tgggtgatact aaaattaacc  
2161 ccataatcca atctttcaga gaagctatgg ctaaagaaag ctttgatgga tcattagctt  
2221 ccttagatga cattatgaca ggtaagggtg attttgcaag tttattaataa ggctatgcac  
2281 aagagggttg gcttgatgca gatatatatg caatggaaaa aggaattaaa tggcaaaatc  
2341 acataggtta tgggtggtgga gcttggtttg aaagagagct taatcaagca aaagctaata  
2401 gctggaaagc aagcagtgaa agtataaatt cttatgttaa ttctataatg gatagattaa  
2461 ataatcttat aggacagact agggtttagg aagtaaataa aaagaaatta atatcgctta  
2521 attgcatat taaaatccaa aatgttctat ttcaaaattt aaagatttgg gtaaatgag  
2581 tttgtaatct ttgagttggt ttttaggatt aacaactaaa gcaaatccac ctttattgta  
2641 tctatcccaa acactataaa atttcttttt agaactgata tattctccat aacttggatc  
2701 aagtatttgt aaataattac ctttatgatt ttatgccgca acaaaaattt caagctatat  
2761 aaatttatat ttttataagt tttataaaac ttttattttg ataaagctta tagttattat  
2821 ttttaataaa tataaaaaat tttataatat ttttctatt tataatttaa ttttatatga  
2881 agttaattga ttaaacaata agctaattaa tagaattctt atcggtataa aggttttatt  
2941 tagtttttat ttttttaaa tataataatc attcttatta ttaaataata aaggaatgct  
3001 ttaatgattg atttttcttt atgccaagaa gagtttaatt tcttgaaaaa agaaggcgtt  
3061 attttaattc ttgatacga aaacaatttc gatatggcaa aaattaataa tgatgattat  
3121 tatgatggta ttttttttaa ggttgacgcc tataaagaat ttattaaaga ttgtgcattt  
3181 aaagattata gggttgtgct agttgaaaca ggaattgatc aaattttatt atataatac  
3241 aggcataaaa tagaagattt ttttagataga ggtggaattt ttattagctt tgctgccaat  
3301 tttttagaat ggttgccagg aatatgctt tataaggaga gtaaataatc tatcaaggat  
3361 agagtgatac agacgaatgg gcatgaaatc actcgtgggg ttaaagatta tgatattact  
3421 tatagaagag gagtgtgtgg ttttttact agaggatatt ttgagccacc aaaaaatca  
3481 gaaatagtct tgaaagacaa ttttaatcag tgtgtcgctt atattgatta tgatactact  
3541 agcgggggta tagtaagcac agcgggtgca gatttgttta attatggctt atttgaacia  
3601 agcacagcaa agagaatagg gtttaatttt ttgctatggc ttagcaaaat aattaaaaat  
3661 ggcaagcaa aggggataaa atgaagcag caattataac tgggtgtgca tttcataatc  
3721 aaaatttttt caaggtaaat aatggaaagt ttggcgatat gtttcaagaa agaatttatc

3781 ttccggaatt aaaagctata gatttgatgg tttatgatta tattgtaatt gcttctaggt  
3841 taaatgtagg atttttactt caaaataaag ataaatTTTT agagtatctg aaaaatggag  
3901 gacatattgt tagttttggg gatgtaaagg cggattatTT gccatatatt gattttgaa  
3961 aacacaagt aaatTTTTgg tgggtgatac acaagggggc tgatttacct ttgtatcaat  
4021 acgataaaaa caacaatatt tggcaatTTT tagatatcaa agagtgcaaa tggcattatc  
4081 atggatttta caataaaaa gaaggttgcg aaaaaattat agtagatgaa ttaggtagga  
4141 gtattttgta taaagatgct acaagTTTT aaggaaatat gtatgttact tctttagatc  
4201 cagattatca tattggacag ggatttatgc ctattactat cccTTTTta gaaaaattta  
4261 tatcttgggt tgaggaagat attcggcata agtagaagat gttttctatc tataaaaaata  
4321 attattgatt ttacaaggat ttagataatg attcataaga tggttgtaat gttttttgtg  
4381 atggtgagtt gcgtttatgg tgaacaaaga gtggctatta taggaggact ttggcctctt  
4441 gcttctgtgg cggctTTTT gacggatgct aaaattgtat atatgcaaaa ggcctctttt  
4501 aatgccatgg agaactcttt ggcttcaaaa tatcgtcaag aatataaaca agccaaagtt  
4561 ggaaatagtg aaaatttgga agagttaata acaataaacg cagatattta tatatgtggg  
4621 gttgcaata taaagctttg tagtgcacta agaaaggcag gcttaaagt tgttgagtta  
4681 actacaaatg tggataatta taattctaaa aaaacattag aacattggct tgtttctttg  
4741 gagaagtatt tttctataca acaaaacaat aagaaattac tagatgagat tacacaagta  
4801 gaaaaattta tagcttcgcg tgttggagaa cataggatta aagcgattat tattcgccag  
4861 atagataaag gcagtatttt atctggagtt tttagccatt atttgattac aaaaagtgga  
4921 gctgaaaatc ctttaggaga aatcttagga aataaaatca atatagagga gatttcaaaa  
4981 agcgatccag atgtaatcta ttttcaaac tttaccctt taatgccaga agatttggtg  
5041 caaaataaag aatggaaaaa tatgaaagcg gttaaagaag ggcgtgttta caaattgcct  
5101 ttagccacct atcgtccttt tgctccaagt cttgatttgg cacctacttt aatgtttatg  
5161 gcgcaaaaaa attatcctag tgcttttaa gatatcaata tagaggaat ttacaagaag  
5221 cattttatgc agtattttgg catttcttta gatgataatg atttacataa aattctaaat  
5281 cctagtccta atgcaggtat tttaaattaa tttttataca aagaaagaag aatatgaaaa  
5341 agttttttta tataagtttg attagttctt gtttgttggc tcaagaagct gatgtaaaaa  
5401 cttattctct tgataaaatc gttgtagcag gagatgagat aaacgatgat gtggtttggg  
5461 acattttgca attggaagaa gagttgcaa ctagaagtgt aagtgttgta agtcaaaaag  
5521 atattttaag taaaggtgga agtggtggag ttcaaggttt gcttgaatca gttcctggta  
5581 ttatgtattc tcgctcgggc ggagttgggg gtcaattaag cgtaagggga atgaattcta  
5641 ataattctcg ttctattatc gcaatagatg gggtaagagt aacaggaaga agcactttag  
5701 agcttaatat gattgatcct aattctttgg agggcataga ggtaattaga ggatcagctt  
5761 cttccttata tggctctaat gcaattaatg gggttatcaa ttttaagaca agacgctata  
5821 acggcgatat aaatgaacc tttaaaatgg atgctaagat tagagcttta gaatttaata  
5881 gtgttaatgc aggatttgga agtagggcag aattgttagg aggcggtgat ggctgggata  
5941 ttttactagg aattcatggg cgcaagggtg atgattttag aacccagaa ggcattgcta  
6001 aaaattctaa atatcaatcc tatgggacag attttaacat aggttatacc aaggataata  
6061 ttcgttatta cactcaagga aaatttcaaa aaattaatac ttataatgca ggtggaattc  
6121 atgcaaaacc aggtagttat tatgggattg taagaaacga ggatccaatg tatgagtatt  
6181 atataagagg aggtgtggaa gtttatgatc tagaaattgc agataagatg gatgcttatt  
6241 tatattggag gcattatgat acagatttat ggattgatag gcgtagtata ggagaaagct  
6301 ttattcatca gcttgtgcac aataccaatc aagtaggagg agcattaat tttataaag  
6361 agatcgatag gcattcttta ggttatggtt taagtgtttt aagtgcaata tctcctactc  
6421 caacaaaaca aatcaatcaa attagcaatc aagaagttac tacttcaaga tcgactattg  
6481 atacagagat tgctgcgtac ataaaagatg attatagact taatgataat tggatattgt  
6541 cgagttcttt gcgttatgat tatataatca cacaaattgg cagcaataaa tttacaaatg  
6601 aaacgcaaga tatgacggat tttttaaata gccataaaaa aaagacttca gatgccttaa  
6661 cgggaagtat aggtgctttg tattatatta atgataaaat tgcattgata ggtaatgtaa  
6721 gtcagaatTT taaaagccct ggaacaacag gtttatttcc tagtgccact tcagaagcaa  
6781 atcacgattt aaaaccagaa tatgcacaaa cttatgaaat aggtggaaga tatcaagagg  
6841 gtagtcatta tggttctttg gtgtttttta gaacagatta tacagatatg atacaaaata  
6901 taaacatagg aggaggcaag gtacaagctc gaaatatcgg taaggcttat attcaaggga  
6961 ttgaatttga aagtcacat agaattatgg aaaattggct tgttgatatt atagcagcct



|       |             |             |             |             |             |             |
|-------|-------------|-------------|-------------|-------------|-------------|-------------|
| 7021  | ataattatgg  | tcaagataag  | acagctgata  | agcctcttgc  | atatatcgca  | cctttatatg  |
| 7081  | gtaatttagc  | tttgggatat  | gaatttaatt  | ggggatatat  | aaaatggatt  | caaaaggcat  |
| 7141  | atcttggtaa  | aaatcgaata  | gattctactc  | aagaaagaga  | aacaaacagt  | tatacaatta  |
| 7201  | cagatattaa  | tgtaggggtt  | gatttgaagc  | attttaacaa  | agaatggaaa  | gatatgcaat  |
| 7261  | tgacttttgg  | agttgaaaat  | ctttttaatc  | aaaaaggacg  | aaatcctaca  | acagctgaag  |
| 7321  | atatagccta  | tgctagagct  | cttacaaatc  | ctttgttggg  | gcctggaata  | aacgcgtttg  |
| 7381  | ttaaatttgc  | atataagtat  | taagtcatgt  | tgaagtatat  | tataggtttt  | ttaatattag  |
| 7441  | tactagtaag  | tttttatgta  | atgggtattg  | gaagatatga  | aatttcttat  | atgcagatgc  |
| 7501  | taaaggatgat | ttacgcggtt  | gtattagatc  | aaccttcagt  | agatgaaaaa  | ttagaatata  |
| 7561  | ttctttttaa  | tgtcagaata  | cctcgtatta  | tttttagcaat | ttttgtagga  | gcttctttgg  |
| 7621  | gggcttcagg  | agcttctttt  | caggctatct  | ttagaaatcc  | tttagcaagt  | ccagatatct  |
| 7681  | taggagtagc  | tagtggggct  | ggatttgggtg | cagcgcttgc  | attattactt  | ggggctaattg |
| 7741  | tttatatgct  | tacatctttt  | gcatttgtgt  | ttgggggtttt | aaccttattt  | ttaactttat  |
| 7801  | tagtcgcaag  | agattatagt  | aatagaataa  | tgattgtttt  | gggtgggatt  | attatcacag  |
| 7861  | ctttttttca  | aagtcttata  | tctttattaa  | aatatatagc  | agatcctcaa  | gatactcttc  |
| 7921  | caacaattac  | ttattgggta  | ttaggctctt  | taagtgtgag  | taatttagga  | caattgggat  |
| 7981  | tttgttgcac  | aggaatgttt  | ataggggggc  | ttatcatagt  | gatttataga  | tggaagcata  |
| 8041  | atttattaat  | gctagatgat  | aatgaagcta  | aaagtttagg  | gcttaatatt  | gttcgtctta  |
| 8101  | ggattatctt  | aatatttgcct | acaactttga  | tagtttcttg  | tgttgttagt  | atatgtggaa  |
| 8161  | ttataggatg  | ggtaggtctt  | attattcctc  | atattgctag  | aattattgta  | ggtagcaata  |
| 8221  | tggctaaagt  | cattcctttt  | agtttgatta  | ttggcgcttt  | gtttatgatt  | gttatcgaca  |
| 8281  | cttttagtcg  | ttctgtgagt  | tctgaagaga  | tacctatttc  | tattcttagt  | gcgattatag  |
| 8341  | ggtcattatt  | ttttatggct  | atttttatct  | aaatgaaagg  | agagatgaga  | ttgtgagctt  |
| 8401  | gttttagagta | gaaaatggaa  | cttttatccg  | caaccxaaagg | ataatcttta  | aaggaattaa  |
| 8461  | ttttgcaatc  | gataaaagtg  | aagttttggc  | tattcttggg  | agaaaatggag | tgggcaaaac  |
| 8521  | tactttaatc  | caatgttgca  | tgggatttct  | taagtgggct  | gatggagcaa  | gctatttgca  |
| 8581  | aaatagagcg  | gttgaacaa   | tatcacatca  | ggaattatct  | tctaaaatat  | cttatatacc  |
| 8641  | gcaagctaaa  | aatttaaaga  | tccgcttaaa  | ggttcttggat | atgatacttt  | taggttttaa  |
| 8701  | cactaagatt  | acaacgatac  | ctaaaaaaga  | gcatattgat  | aaagctaattg | aaatcatgga  |
| 8761  | agatttagag  | ataatgcatt  | tagctcaaaa  | aacttgtgat  | tgtttaagcg  | gaggagagtt  |
| 8821  | gcaaatgggtg | atttttgcta  | gagcactcgt  | gaatgaacct  | ttattgattg  | tgctggatga  |
| 8881  | accagagtct  | aatttagatt  | ttaaaaatca  | agatagagtt  | ttaaaaactt  | tggaatcttt  |
| 8941  | aaaaaagaaa  | ggaaaaagcg  | ttattatcaa  | tactcactat  | ccacaaaatg  | ctcaaagact  |
| 9001  | tgcagataaa  | atacttatta  | tgcataaaaa  | tagagattgt  | attataggag  | ataagcaatt  |
| 9061  | gataaataaa  | aggcaattaa  | gcaaaaagttt | cgaggtagat  | cgtagttttt  | tccaatatat  |
| 9121  | ggcaacttta  | taatatgaaa  | tttttaataa  | actttaacaa  | ttttaaagga  | tttaatatca  |
| 9181  | cttaatttgcg | atattaaaat  | ccaaaatggt  | ctatttcaaa  | attttagagat | ttgggtaaaa  |
| 9241  | tagatttgtg  | aaatttgaga  | ttttaaattc  | attttctttc  | taataacaaa  | ataagataaa  |
| 9301  | atttgtataa  | tttttaaaat  | caataaagga  | gaaaaagtga  | aaaaaatatt  | ttatctttta  |
| 9361  | actttgtttt  | ttgctctaaa  | tttggctgca  | aaagacttgg  | ttgtaggatg  | ggagttgggt  |
| 9421  | tatccacctt  | ttgaaatgag  | cgataaagac  | ggaaaagcaa  | gtgggattag  | tgttgatttt  |
| 9481  | ttggaagcct  | ttgctaaaga  | aatgatttac  | aagcttatag  | taaaaaatat  | cgcttgggat  |
| 9541  | gggctgatac  | cagccttaag  | aacgggtaaa  | attgatctta  | ttatgtcttc  | tatgacaatt  |
| 9601  | actgatgatc  | gtaagaaagc  | tgttgatttt  | agcattcctt  | atgcacaagc  | taatttagca  |
| 9661  | attttaactc  | ccctaaattc  | agatattaaa  | aatatcaaag  | atttggatca  | aaagggtaaa  |
| 9721  | attttggcct  | taaagagagg  | ttctactgga  | catttatatg  | caaataaaaa  | tcttaaaaac  |
| 9781  | gctacgatac  | atttatttga  | taaagaaaat  | gcagctatct  | tagaggttat  | acaaggcaaa  |
| 9841  | gcagatggat  | ttttttatga  | tcagcttact  | atttatagaa  | cttggcaaaa  | acaccaagat  |
| 9901  | accacaagag  | cgatttttagc | accttttcaa  | gaaaatcctg  | aattttgggg  | tatagctata  |
| 9961  | caaaaaggaa  | acaagagact  | taaaaaagaa  | cttgatgatt  | ttatcactca  | aagtaaaaaa  |
| 10021 | gatggacttt  | ttgatagtct  | aggagagaaa  | tatcttaaag  | aagttaaaga  | tacatttaag  |
| 10081 | aaagaaaatt  | tgcaattttt  | cttttaatta  | aaaaaggcct  | tgagcctttt  | ttaagttaca  |
| 10141 | aaactttcta  | ccaatctttg  | aacaagtaaa  | ttccaccat   | ctacaagaac  | aaaaatcaaa  |
| 10201 | agtttaaaag  | gcaatgaaat  | cataacagga  | ggaagcatca  | tcatccccat  | cgccatcaaa  |

10261 accgaactta caaccatatic gataacccaaa aacggcaaat aatcaaaaa gcctatctca  
10321 aaagcagttt taagttctga aatcataaaa gcaggaacta aaaccgtaag cggaacatca  
10381 tcaatggttt tagggttggg aagggttgcgt atgcgataaa ataaagctaa atctttttcg  
10441 cgtgtgtttt taagcataaa atcttttaaaa ggttttacac ctcttgcaaa agcttcttca  
10501 tagcctatth gctctgctaa ataaggcttg ataccttcgt tataagactt ttagccaca  
10561 ggttccatta taaaaaagg taaaatcaat gccaaagtta ctaagatcgt attaggcggc  
10621 atactttgag tccccatggc ttgacgcaag aatgaaaaaa ctacgatcaa gcgcaaaaaa  
10681 gaagtcataa caaagactat acttggagct agtgcaagta tggttaagac tatgactata  
10741 tttagggttg taacaagttg attaggagta tcaggagcac ttaggcttaa atttaccgta  
10801 ggaattgttg cttcggcagc gaaaataacg ctaaaaaaac cgctgataaa caataatgtt  
10861 aaaatthttt tcaaaaataa accttgatta aaaaatgaaa cttaatthta actthttactc  
10921 actaaaaaag agthtaactt gctthtaattt agagaaaaat ttaactthta aatgthtaaa  
10981 ttaaaataaa attatcctca aaaggctthtt tataatgaaa actthcattt tgatthtagc  
11041 agcagggctt ggaacaagaa tgaatctga aaaacccaaa gtattacaag aactgtgtca  
11101 aaaaagtatg atthtgata thtttagaaa agctthttgct ataagcgaag atgtgagcgt  
11161 ggtthttatct catcaaaaag aacgcgttga aaaagaaatt ttagagcatt thcctaaaac  
11221 gcaatthta gaacaagatt tgattaattt cccaggtact gcaggtgctt taaagggtht  
11281 tacgcctaaa aatgaaaaag thtttaattct ttgtggagat atgcctthgg ttgaaaaaac  
11341 aagcctggaa gctthacttc aaagtgatgg tgagcttagt ttggctgtht ttaatgcaag  
11401 agatgctaag agctatggaa gagtgattat taaagatgat caagtggaaa aaattgttga  
11461 atthaaagac gcaaatgaag aagaaagaaa agtgagtatt tgcaatgcgg gtgtatatgt  
11521 gatagagtct aagctthtag cacaaattct acccttata gataatcaca atgccgcaaa  
11581 agaatactat ctaaccgatt ctatctctth agctaaaaaa caaggtgcaa gtatcaaacg  
11641 tgtthttgta gatgaagatg aatthtatggg gataaatgat aaatthtgat taaacatagc  
11701 acaaatthta atgcaagaaa agatthaaaa acactggatg aaacaggtg tgatthttca  
11761 thtgccacaa agtacttata taggaatgga tgtggaatth gtgggtgagt gtgaagtata  
11821 tgaaaatgth cgcatagaag gaaaaagcaa gattgttaat tctatcatta aaagthcaag  
11881 cgttattgaa aatagthttg ttgaaaattc tgatgtaggt cctthggcac atthgcgtcc  
11941 taaatgcgag ctaaaagata ctcatatagg aaatthttgta gaatgtaaaa atgccagtht  
12001 aaatggtgta aaagcagggc atthtaagcta thttgggagat tgtgagatag agagthgggac  
12061 aaatatagga tgtggaacta taacttgcaa thtatgacgga gthtaaaaaac ataaaacct  
12121 cataggaaaa aatgthtttg taggctctga tactcaatth atcgcgcctg taaaataga  
12181 agatgatgtg atthttgctg ctggaagctc tgttgattgc aatgthgaaa gcggagthct  
12241 thttatcaac cgcgcaaaa aaaaacttat caagattat thttataaga aatthcaaaa  
12301 atgaaaaaaa ccatactct agccataagc gtagtatag cthtttataa agcttatgag  
12361 cttatatctt tgtthtaaaa agaaggttht agggtaaaag tcttgctthc taatggactt  
12421 ttaaaattcg cttctaaaat gagctthgag gctthtagcag atgaaattht atgcgaagag  
12481 aatgagagct ggaaaaactc aaataatcat atcgctthta gtaaagatgc ggatthgatt  
12541 cthtttgac ctgcaagtgt aaattctatc acaaaactag cthtaggaat agctgataat  
12601 cthttcatal aaaccctaat tgctacaaac aagccatta tcattgctcc tgctgcaaat  
12661 accaatatgt atcatctth tagcaccaa aatthcattag tcttgctthaa aaaaatcaa  
12721 gctthgatta tagagcctaa thcaaaaatt thtagctthgta aggatgaggg tatcgagct  
12781 ttggctgaag taaaagatat cthtaataa agcaaaagag agctthtaaa gcaatcattt  
12841 tgggtgtgata aagaagthgt cattagthgt ggagggacaa aagaaaagat tgataatgtg  
12901 cgttgtgtga gtaatthttc aagthgaaaa atggcaaaag caatcgctga tgcgthttat  
12961 thtttaggag ctaagthaac gctthtaagt tcggtthatt ttgatactcc thtatctctt  
13021 aagagthttg aaagthcgct agaathaaaa gaatthctag agcaaaattc aaacaagat  
13081 tathaatca tggcagcagc tgtaagtgat thtatacccg aatthaaaaa aggcaaaatc  
13141 aaaaaaatg agcattthaga ggthtaaat ttgcattthaa gataaatga agatctgctt  
13201 aaaaatthta atthtaagg taaaaagata ggctthtaaga tggatthtga cgctcaaat  
13261 gctthtagaaa atgctaaaaa atcgctcaat gataaaaagc ttgatthgtt thgtctaat  
13321 atctthagaag aggaaaaata thttggaagt tctaagaatg aaatthcattt tattacagca  
13381 aacaagatthg aaaaaagcgg thtaaaaagc aaggaagatt tggctthtga thttgctct  
13441 tgggtgthaaa aaatthgaat atgataaact caaccctacc tatacaaatg aagthtttag

13501 caaaatcagg ctatgcgcac tatacgcttt tgctcaatca tagaaaaatt caaaccaaaa  
13561 gcatgataga attagaaatc ggagctgagt atttagctga gctttatata gaaaaaggcg  
13621 gtgcatagac atttaagcat ttatccaaaa gacctgaatt ttatcctttt gaagagggat  
13681 tatctttgat agttgaaatt ttagaaggca gggttgatta taaaaaatat attatttcaa  
13741 atcttttaga atgcaaagac aaagagaagt atcatgtttt aaaagaaatg ctttttgcaa  
13801 gttttgaaaa tatctatcat atcccctttt tctttgaggg taaagcttgt ttgtttcaga  
13861 tgaaaaaaag agttaaatth ttagaagttt atctttatth tagtgtctth ggagctttga  
13921 aaattctgat cgatgagggt ggaatthcga taththcccc atthththtaag gtgcaaaaat  
13981 tththaaatga acaattgaaa ththaatgthh tgcaagataa aatatacaa cththththg  
14041 taththaaaa attaththgat ththaaagggt aataatgaat gaactaaaa acctthgctgt  
14101 tgtaatggat ggcaataggc gttgggctaa ggcaaaagg tththtagcaa agctthggata  
14161 ctctcaagggt gtthaaacca tgcaaaagct tatggaagct tgtgtagaag agggatthtc  
14221 aaatttaagc cthththgcct ttagcactga aaattggaac aggcctcaag atgagattga  
14281 atththththh gagctththgg atcgtthgthh ggatgaagcc ththaaagaat ttgaaaaaaa  
14341 taatgtaaga thhaagagcta tcggggatthh atcaagacth gatacacatt tgcaagaaaa  
14401 aatagccctt gtggaagaaa aaaccaagca thgtgaththh cththgtgtga atthtagctat  
14461 cagthtatgga gcaaaagatg aaatcgthcg thcagththaa cgctthgathg aaaaaggctt  
14521 ggaaatcaat gaaaaaataa taagcgataa thtagactthg cththtagatg tggaththgat  
14581 gctthcgctg ggaaatgcca aaagathgtc thaththctth cththggcaat gtgctthatgc  
14641 agaaaththt ththtagcga cctthththcc thctctthaca aaaagagaat thaaaaaat  
14701 cataaaagaa ththagaaaa gagagagaac ththggaaaa thaatctata gctthththga  
14761 ththtagctat ththaggagcg agctthgggtt cgthththgtat gathatgaca atgctththh  
14821 gtgaaaacaa accctthatta agctthgcgtt cthththgctt thctthgtcat caaaaactta  
14881 agcctththga gtthaatacct atthththctt atathththct thgtththtagg tgthaaactt  
14941 gccatacaa aatcccctthh thththththh thggctgaaat ththggggath atthththgctt  
15001 ggathgctta ththattaagt caagaththgg thggaaththt ccathththth atththththt  
15061 thgtthththt thgcaththct thgtathgath thaaaththca ggctgtacct caaaaaththg  
15121 ththggthgat thththththh gcathththct thgtctththaa thgtgathgaa thththththt  
15181 thththththt thgagaththh caaaathggat thththththca ggctthththt ththgctggth  
15241 thththththh actthaaaaat thththththct thththththct thththththct thththththct  
15301 aagaaaathh aggcgathgca gathththth thctthgctag thththththct thththththct  
15361 thhaagggtgc thththththh cthththctth cththctththt thctththgctt thththththct  
15421 aththaaaaa thththththh gcathththth cthththththh thctthgctthh thththththct  
15481 thgathththh gathththctg gaathththt gaaactthgct thhaagathth thththththct  
15541 atththththt acaathththt cgaththththh thgtgctththh actathththh cgaththththh  
15601 thththththh cththgcaagc ththctthctag thththththh aaththththh atththctthh  
15661 atththththh thththththh thththththh thththththh thththththh thththththh  
15721 cgctththgct thththththh thththththh thththththh thththththh thththththh  
15781 cththggathh thcaccthaaa thththththh gthththththh aaththththh cthththththh  
15841 cgactgathg cthththththh cthththththh gaththththh thththththh thththththh  
15901 thththththh thththththh thththththh thththththh thththththh thththththh  
15961 aagaththctt gaathggathg thththththh gaggcaagaa agthgathgath atgaaaathh  
16021 catcatgath catccaaaac gcaathththh agacaaagaa caathgathh thththththh  
16081 agcathgathg caaaaaaatg aagacagctt thgtthththh cththctththh gcaaaaththh  
16141 thathththgaa aathgaththh cgctthththh thggaaaththh gathagctca thgtcaathh  
16201 thcaaththgath aathcaaaath thththththh thththththh aaththththh gaththththh  
16261 thcaaatccc caacgcgca aagaaththgt aaththththh accathgathh thththththh  
16321 thgcaagcag cthththththh thththththh thththththh thththththh thththththh  
16381 thththththh gathgaththh gaththththh thgtathththh gggctthththh gctthththh  
16441 acagctthcg atththththh ctgthththh cthththththh agththththh cgctthththh  
16501 thgtthththh aagathgathh thgathgathh thgathgathh thththththh thththththh  
16561 gathgathgath aaththththh thththththh thththththh thththththh thththththh  
16621 ththcaagath cthththththh thththththh thththththh thththththh thththththh  
16681 gathaggggth thgathgathh ctathgctthh gcctthththh aathgctththh gaththththh

16741 aatttgagct atcttaaaaa gcaaattaat aaatthttctc atcctttcat acatattaaa  
16801 aatttaaaaa tcatgccttc aaatthtgaa gtaagataca atgtaaaaag cagagaatat  
16861 cgctatatct tttatcacgg agcttataat cttttttgg cttcttatgt tcatthttat  
16921 ctttttatcg atatthtaaa ggctgatctt atthttgcaa atthttgtagg tgttaaggat  
16981 tttaaattct tttgcaaaag cggaggggat aataaaacaa ctatcaggga aatathttta  
17041 gctaaagcgt attcttataa ggatthttact atthttcgtt ttaaggctaa tggthtttta  
17101 agagcacaaa taagattaat ggthtgcgagt gthttaaaag tthttagaaa taagatgagc  
17161 gaggaagagc taaaggagca aatcgaagct aaaaaacaat acaatcattt tttagctcca  
17221 ctttgcggac tttatthtgag tagaatttct tattagaaag tttcgtaaaa atcaaaacct  
17281 ttatctthta agatathttct aacttcttct tgatgttctt tgcctthtggc ctctaagggtg  
17341 atagaaatca tagcatcgcc ataatcaagc ttggttgaaa atctatcata atcaatctta  
17401 actatathttg cattggctga tttcaagctg tctgtaagat tgagtaaagc tcctggtttg  
17461 tcaattagag taacattaat ttgcathttta cgataagctt taaaagacc tthttctatg  
17521 atgatgtthta gcathttgtac atcaatgttg ccaccactta aaacaacgcc tathttthta  
17581 gaattctthta tatcgathtt ttgatgaagt agggcggcca cacttgcagc acctgctct  
17641 tcgactatga tthttatgttt ttcaagtaaa aacaatacgc cattagcaat ttcttcatca  
17701 tctacttgaa caaattcatc tacgcactta agaataatgc ctaaattaat cggattagca  
17761 tcgcgtagag caataccatc tgctatagtg cgcacacttt tagagthttt aacttcttht  
17821 gctthtaaac tatcatgcat tgcaggagct cttthtggcg ctactgcaat aathttgata  
17881 ttgggattaa tctgctthtgc agcacttgct ataccgctaa taagcccacc accccaaca  
17941 ggagctatga tagtatcaag atcgcttata tcatcaagca tthcaagcat aagtgtgct  
18001 tgtcctgcca tcacaagttc atcttcaaaa ggttgataa agctcaatcc atthtcttht  
18061 gcatagthttg ttgcaaaggc ataagcttca tcaaaattat caccctthta gatgacttcc  
18121 gcgtctaaat tthttggtagc agaaacttht aagagcgggg tggattcggg cattacgatt  
18181 atggctthttg tgccaaattt cthttgcact atagcaacgc cttgagcgtg atthccagca  
18241 ctagcagcta taactcctgc tthtttagct tctaagtcta aattggctat tttattatat  
18301 gcgccgcaa tthttataagc tcctgtaatt tgcaaattht cathttthta atacacctca  
18361 cthttgcaaa gttcgctthaa aaaagaagaa tgtataaaag ggtthttgct taaaaatca  
18421 gcaathtttht gthttggcttg atagathttta tthtagttcta gcathttatth atcctatcct  
18481 gataaagtgg taattcgcgc ataatgcact tatcttgtat aaaattaatc tthathttth  
18541 cgcattcttht agcaacttca ttgttgcaaa ttccaagttg tagccaaaaa ttctgaattc  
18601 cthttctggat aatacttggc aataatgaag aagcaaatc acctthtgcga aacathtaaa  
18661 caagatctat tthttcatcg atatcatcta aacttgcata aacgcgttcg cthaaathtt  
18721 catcacatht aggatatata ggataaatht tataattatt tctthtgaaa aattgtccta  
18781 tcataaaaga aggccttgctt tcatcggggc taagtcctac tatggcaatg gthtttgtat  
18841 tgttgagtat tttatctatg atthaaathtt catccatcgt tgttactthta tataaaatht  
18901 tthaaathttt aatcataatc thathttcgct taaaaataga tthtaathta aaathatatt  
18961 tatataaaat taactaaagt gaathttthta aaathcaaaa atthtctaaa thathcaaaag  
19021 ctathtaaaaa aggagtgaat tatggctcaa gcttatcctt gtaththtaath cattcatcta  
19081 atctgtgcaa tcttctthtgt aggtthattta tthtgcgata tthttatact caathacaath  
19141 aagagaaaaa atccaaatht tgataaaaaat cthttthtctt ccgtgggtgt taagattatg  
19201 cthtttatcg tathattgct atthtttaagt ggtggtgcga tgataagtht tcatctthaa  
19261 cthttaaatht taaththtttht gataaaatht atthttagcct thagthattth atctthtagtg  
19321 gtgthttctt taththttthca tthttgtgcta aagagaaaaa atcctthtaac gcgthttata  
19381 catcctthttg tthttgtgct ttgtathttth atcgtgatht tggctaaagt gatgaathat  
19441 taththtttht aaththtcaa cthttcaatht taagattgtt tagaatgcaa agaththtaaa  
19501 agtactccgc atthctaaatg tggagtattg acaactgat caaaaagtgc aaaththttca  
19561 accctgtgcg taagagaaag thctthttaaa thctthttca aactgatagg atthacaagaa  
19621 atataaatga tgtthttcata atthtttaath aathcaatca cactthttatc aagtcctgca  
19681 cgcggtggat cgactaaaat atgagaaaag thaaathttat cthaaathcaat atctthttaag  
19741 cgaaaaatht ccctthcttht thttaaagct tgagataath cctcgttga aagccttgta  
19801 aaatggatat thgaaatht gttgatcttg caathaaagca aggcaaaath aathattgctt  
19861 thtgaaatht cagtagccaa tactthtatcg aaaaaatht ctaaggctag agtgaaatht  
19921 ccatatccgc aataaagctc aagcaathct thtctthtctt gagcttgtaa atthttcat

19981 acccaagtta tcattttttc attgatagag gtattaggct gtatgaagca atcattgtta  
20041 aattcataaa atatttttct accttgata tcaagttctt gtcttaaatt ttcttttttg  
20101 aaaacaagtt ttttaccttt gcttcttgcg attaaatttg catcaagttc taaacttaaa  
20161 ttatttaaat catcacaat aagctctatg tttttatgat aaagtagagt ggtgctcaac  
20221 tcatttttag ttgctaagaa ctctacaccg aaaagctttt cttttaaatt tacattacta  
20281 cgaatttggt ttaagagttt aggcataaaa gcggtgattt tttcatctgc aaaatctaag  
20341 ctttctatga tgatcttctt tttattttta aacatcgcat aataaatttc atctttgtca  
20401 tgataaaacg aaagctccgc tcttgtgcgg taatgtttat ctttagaaga aaaaagctcg  
20461 taatttcctt gataaaaatc tttgaaaaat tcttttataa aaaaagcctt ttcttctaaa  
20521 tttgaaaaat tgccaaattc ttggaggctc atgaaacttt ctttccgata attctaagca  
20581 aaaatgcaat aagaatthaa ttcaaaggaa gaaccaacca tacactaagc ctaaagaaa  
20641 caggtatgta tccagcaaat aaagaaatca cacaaataaa taaagcataa ggaatttgag  
20701 tacgaacatg ctccatataa tcacattttg cactcattga cgaaggattt acattgtctg  
20761 aaataggcga acaatggttt ccaaaaatgg ctccagttaa aacgcaactt atattaatca  
20821 ccatataatg atgtattgca tccatatcca ttgcatttat ttgtgcaact ttataggcta  
20881 aaggcactgc caaaggcatt aaaataccca tagttccata gcttgttctt atggcaaaag  
20941 aaataactga agcaaaagca aaaatggtag caggtaaaat aaattcaggt agtttatcag  
21001 ctagcaaaact cgagataaat tctggagttc caagctcttt tactatgctt gaaagcgacc  
21061 atgcaaacia aagtaaaact atggtaaaaa tcatagtttt ccaacatat atccaagttt  
21121 caactgcttc tttaaaatta aaaatcttgc gatacacccc aataaaaatt gccacaatag  
21181 cagcaaataa agccgcttga aaaagcacca ctgaagaatt tgcgtttcca aaggctagcc  
21241 taaaagtttc aaaagacaaa ggatttgcat ttgcttttat taattcttcg ctttttaagg  
21301 tgctcaatcc attaaaataa aatccaagta tggctaaaat aattaaagtc aaaataggaa  
21361 tcgtagcatc taatgcacga attttaatac cttcttttgg agctaaaaat tgatcttcaa  
21421 attctgcggg atctagggta cctgattttg gtaaaggagc gatttgtcct gtggttcttg  
21481 ctgcaatttc agcctttaac ataggaccaa attcacgcc cataagtgca gtcattaaaa  
21541 caaagaaaag cataaaaata ttgtaaaatc tataaggatg ggtttcgagc aaaaccccaa  
21601 aagcgctgat attgctaatt cctatatcct cataggcatt tttgattaaa gatacttcta  
21661 aacctatcca agtagaaatc acagcaatcc ctgagcagc tgcagctgta gaatcaataa  
21721 caaaagcaaa tttttcacga gaaattttta atttatccgc caaaggacgc attataggtc  
21781 ctacgatgag caaattagca taatcatcaa aaaagattag taagcctaaa aaccaagtat  
21841 ttacttgtgc tgatactgct gattttgctc tttttgcaa ttttaaagcc acggcttttg  
21901 caccgccc at ttttgtaatc agtgcaacia gccacctat acataaaatt tgcaagataa  
21961 taccggcatt tactggatct gaagttgatt ctaaaatata agaaataatt tttgaaaaag  
22021 aatctatcgc agtattataa aaatgaataa aacttaagct atcggcttga aaaatattag  
22081 aagcaagact gagcaagaaa gttccgctta aaactcctgc aaaaagagat aaaatcacat  
22141 cttttgtaat aaaagctaga gtgatagcaa ccaaaggggg tataagagta aaaaccccaa  
22201 ataaatttgc atttgcctgtg gcttgatgtg tattggcaaa tgcaatcaa ggcagtaaaa  
22261 aaaatattaa aaatctcatt gattttgctc tatataaaag ccattccaag tttgagtaac  
22321 gggcattagt tctatttcat tgacattgat atggcttggc agattgatga tggacatcac  
22381 tacttttgct atatcttgcg cgcttatgta ttgtgtccct tcataaacg catctgcttt  
22441 tgccttatct cttttaaacc gcacttcgct aaattctggt ttacaaagac ccggggctat  
22501 atttgtaacc ttgatatttt cacctcttaa atcatttctt aaggctctag aaaattgtcc  
22561 tacaatgct ttggttccgc aatatacatt accacaaaa taaggatttt tagcggccac  
22621 agagccaaga ttgaagatat aagcactttt ttgtttgcga agtgtaggaa tgatcgcttt  
22681 tgctacatat aaaagacctt tgatattggg atcaaccata gtatctatat cttctatact  
22741 taatttatca aattcatcta taccaagagc caagccggcg ttattgaaaa gcacatctat  
22801 ttctttaaat tcgttaggta aattttcaac agcattaaag atttcttctt gctttcttac  
22861 atcaagacia aggatgtgaa tttgatcttt gtatttggct ttttaattcat ctaaagatc  
22921 ctttcttctt gctagtgcaa tgactttgta tcttcttgt ataaaagctt caacacaagc  
22981 atatcaaaa ccagaacttg ctctgtgat aaatgcggtt ttcatctag actccctcca  
23041 taaattaaat tttcatttgc ttttaaacct aggcctttgta aataatcagc attatctttt  
23101 ttattagctg ctaaggcaaa atctaaagca ttaaaaccta aatcatctac ttcggtgata  
23161 ttggcacctt ttgcaataag catttttaaa atttccacat ctccataagc ggctgcgtgc

23221 ataagaacat ttttagaagt atgctctaaa gcacaaaagg tgataaaata aggagtatth  
23281 ccacctatat ttgcgcttag ggctaathth tcattatcgt taatgtatth thhthtaaca  
23341 tcggcaccat attctaaaag caatgaaaca atatctthgc gttgaaatth tatggcataa  
23401 aataaaggthg tcttaccaaa agtattggca ctattgacat ttaaacctag ctctaataaa  
23461 aatthtagtht tatcatagct ttctaaagca taaaataaag cattthcata gcctthcatca  
23521 atcctagcgc ccaaaccgat taaaagatth aaaatatctt tgctgcgthg ththtaataag  
23581 gctgctthgaa gtcctatagth aagctcatct cggthgagat tattagaata aataaaatct  
23641 tggatatagc thattgaaag atththththg gataaaactth ttgcaaagg actthatatct  
23701 thatgaatth tagththctc tacagcccaa thtaaaaatt caththaaagc atthggthgta  
23761 tagthaaatth cactacctth atcaaathth aaaththth caaaatathg ctctaagggc  
23821 tctatggcat thattatath ttgcaaaat thcttgataaa gthctgaaath thctatactth  
23881 tgatacgccc aatacctaaa ataagatctth aaaagagthg atththththc thaaaththca  
23941 ggagthtcthaaacctththg atactctatg ggatcaatag aaathththta aagcaaaaaa  
24001 tcaaaththgth gaagthththg aaaaththca acaccgctac aagcagcath thcaccacga  
24061 atthctathgth cgagthgata aagctththg gtaaaagctth gaththththta agaaaaatca  
24121 caagthagaag caatatcaag athagctthgth ththggactat ctthgaaaaat thgggctthg  
24181 thaththththta thaatcaca agthaatgth ththcgctth thaaaccthaaaaacaaca  
24241 aataaaaaca athaaththct caathththct ththgaaath ththaatctat aaththtaacc  
24301 caathctgct thaaaththgth athaaththgth tagthththaa ththcaathth catthaaath  
24361 aagathaththg thaaathththg ctththgctc atcgtththaa ththctgctth cgaththgcaa  
24421 aththctthct thgctthgth thththacctha aatcgcaaa actgctgcaa gthctagcact  
24481 thctagatac accthagcac cthatacccat acgaththgth aagththctthg thgaaathgth  
24541 gaaaacaaca gcgcatctth thactctthg thgaththccc athacatagcg aacaacctgg  
24601 aactthctath ctthgcccag cagaaccaa gatactataa thctctthct thggthgathg  
24661 thctththctc atthththgth gthggaacaac caaagthctha gththththaca thctththct  
24721 thththgath thctcthaag ctctataathg thctataathg thctataathg gthctatactg agcctacgaa  
24781 aactthctcga athathththg gacgaththg atctgcthaa atthctactha aggthcggcac  
24841 athctacgthg thctgthgggc aagcthagaath gggctctthg athctacthaa gaththgathct  
24901 gathgathatac gcatathththg catctththct thgctctthaa agagthaggthg thththagcca  
24961 thctthctath ththctgctc thctagcaag agthagctthth thctthctatc ctgctthctat  
25021 catcgtthct athaagcghaa thgththgathth aathaththctg ctthacactth caathctthaa  
25081 athcaacgth caagcagcag cgtthctthc thgactagca thactthagct caaaagctthg  
25141 thctactthth aaththggca agcctthcaath thcthaaaath ththctgcaa aathathctth  
25201 thththththc thththcaagc thagththgthc thgththgathg cthataathag gthathgath  
25261 thaaagathct ctthaaagthaa ctccagctthg thagthctthca ctthaaacgca cthaaacact  
25321 thcagghcaca ththaaaggha thagagccagth tactgchgca aaagctthaa gthcactthc  
25381 thcagghaaath gaaathctha thaggghaaacg agthgthgagha thctccactg thctactgth  
25441 athcagghthaa acaaaacggh thagccaaga gthgghathct cthctgctg gthththaaagct  
25501 thactccacca cgactthgthaa thaaaththag thaaagththg thgaaaththg aathctgthaa  
25561 ctthggthaa gthcagcathg gacaaaact thgctathca aathctcgcat thaaactthaa  
25621 gctthgcaagc thththaatct catctctthgth catagghact gthgththctth gagaacctac  
25681 gghaagthgth cgagghctth thatacatacc thggacgca cththcaactc cacagghcacg  
25741 ccctagcath thththgagthaa agthathctc accgctthgaa gctthcagghth gthctgghth  
25801 agthaaagath ththctathth ctathctthaa gaththctth gctththagcac aaagthcgcg  
25861 acctathgath agthgghaath thctctctgth thctactthca thcthaagthg thththgggct  
25921 gathththaaac thctgthgathaa caghaaccath thththataath ththctthctat aagghathgath  
25981 thcaaaactha thctccathth ctathathgath thactthcaaa athaathggca aagcaccgct  
26041 athctthgathgth gthgththaaaga aathctggagc ththggththgath cctaththctha thaccact  
26101 athgthththth gghthacathct cgaththctth thcthaaathgct caththgthathg aathgathcgc  
26161 agathththctha ctthgagcctg thactthctac athcactthaa thathctgacth cgcgaccact  
26221 ththththgath thctththgath ththcthaaga acctgctthgth ctthactthth gathathgath  
26281 agcathgthaa gghathgthcac thctthgthaa agcathctthca gchagghctth aathctctgth  
26341 athggththct cctgthctath thaaaactth gctththgathc acctgagghth atththctth  
26401 ththgththaaac caathctgath thgcccath thcthaaaaca gctththgathgct gctththgct

26461 tttgctaagt tctgctacag tatggaaatt atcatggaca aagatgatata ttttaagcac  
26521 ttctgctgca tgccttgcta tgctttcatc ttttaatgca tcgattaata cttttacatt  
26581 gtaaccacct agcattgttt caagcatttt taaagcaagc tttttatcta tggctggagc  
26641 ttgaatttta ttttttaaaa ttccatctag gaattcacat tttatcaagg ctgcatcatc  
26701 aacgcctgga ttaacgcat tttgcaataa agatactaata ttttcatcat tttgggtttt  
26761 taaaagttca caaagttcct tggtttgctc tgcattttaa ggaaggggtg ggatacccaa  
26821 agctgctcct tcttcaaca gcttattgta atcttgcata aaagacattt tttactcctt  
26881 aaatattttt tagtataatt ttagccattt aaaggataaa atagtgttaa agtttattat  
26941 aaaataccat tttgttactt atctctacat agcaatggag atttctaac aaaaatcgat  
27001 ttttgtgatc gcttgggtat tgagaatact tgtcccctgc ttgaatttgc taaagaagaa  
27061 ctcatctttt attttgccaa aaagcttcaa aaatttcaaa cgcccttatg gatacaagga  
27121 agtgaatttg aacaaaaagt atataaagaa ttgataaata tcccttatgc aaagcttgtt  
27181 acttacaag aaatagctat aaatatcaac caccctaaag cttttcgtgc ggtgggtaat  
27241 gcaactcta aaaatttaac tcctattttt attccttgc atagagtggg agctagtaat  
27301 ggttttagtg gatataatgg cggcttgct ataaaaagat ttttgctaga atgagggga  
27361 gttgatttga gtcagtttaa aaataagctt ggagattgat tttcttcatt tttaaattca  
27421 cgctcaaaag cttcataatc ttctaaaagt aggcagtatt taaaattttt taagttttta  
27481 agatctaaaa gtttatcgta tgaaaaatca caaaaatag aattatgcaa agcgggtttta  
27541 aaacccttta ttttttaaa attttcttgc caaaaatcaa aggtattttg attgcttaca  
27601 atgataaatg ctcttgcaat tgagccaaat tcagaaatat taaaattttc atccatgaaa  
27661 taaattttta aatcatctat tttattaaaa tcaaaaactca tttttgtatt ttttctttg  
27721 aggtaaaaca taatttttgc aaaaattttg gcataaataa agggaagatt taagttttta  
27781 aaatacaaat tatcgcaaac tagagtcgta aaaaaaagc tagagcgaga aagtagggta  
27841 aaatttgcct cttttaagac tgttaaagac gcacaaattt gaagcaata attttcatcg  
27901 ctaaaacaaa aaatttcacc ctttttagcc ttgataagtg agttaaaatc tacaatatata  
27961 tttcctttta aaatgtttta agaaaatgct ttgcaaattc ctaattcata agctttagt  
28021 gctaaaaatt cacactcttt ttcttcacat aaaaaacgca agagtttggg taaggctgat  
28081 tctaaattat ccacctgaag ataataaatt tctttatcat caatacaag ctcatgctct  
28141 gaaataatag caaatgcacc tttttgcaat gcttggatta tctctttttg attgttacta  
28201 aaaaaagcga aaccattttt aagctcatga agacttaag caaagcctgt aacgcttaaa  
28261 aactgcctt cattgagcat atttgcatga atgagttcgc ttagattgct aatattcatc  
28321 ttagcctact aaagatccgt tttctacaag ttgttcaggg cttatgagca caagtttatc  
28381 tccgcttttt gcagaaagta tcataccatc gctttcatgc ccaaaaatct tagctttttt  
28441 aagattgctt ataacacaaa cttgctttcc tattaaatca cttgctttat aatacttagc  
28501 aatacctgaa agcacttgac gaatttcttt attgtcaagt tcgagtttaa attttaaaag  
28561 ctttctactg ctttctatat tttgacaatc aattacttta gctacttga tctctatttt  
28621 tgcaaaatca tcgattttga ctttaggctt ttcttctttt ttaacttctt gcttttctt  
28681 ttgagataaa agaggctttt ctatttttgg aaataaagct tcgcaagcat tagtcttaaa  
28741 atccaaaagt tcattttgca atataagttt ttgataattt gtaggtgaaa tttcaaaatt  
28801 taaagctaaa cctacctttt gacaagattt tggcaaagta gggcttaata aaagacttgt  
28861 ttttagctaga atatttgcac aaagtcctat aagagcattg gcttctttgg ttttatttgc  
28921 tttgattaaa ttccaagggt cgtatttgct aatggctaaa tttgcaacac ttaaggcttt  
28981 aaaaagttct tctagatagc gattgcattg tagattttct aaaaaattta tagaactatc  
29041 taggtgttct ttagctgtat caagttcatt tttgtaaaat tctaaaacgc cttcttgaga  
29101 aatattgcct tgattgtatt ttatactcat tcctataatg cggttaagca aattgcaaaa  
29161 ttcattgcct aattctgtat tgattctatt aatcaaaaac ctttcgctaa aatcaccatc  
29221 attcccaaaa ggaacttctc ttagcagaaa gtatctaaaa gcctctaac cataagcatc  
29281 taccacttct ttaggtttta caacattgcc tttagattta ctcatTTTTT caccctcttt  
29341 ggtccaccag ccgtgtgctc cgataaattt aggcaaaggt aaatccacgc tcattaaaaa  
29401 agctggccaa taaatcgcat gaaaacgcaa gatattttg cactactaagt gtatgtgagc  
29461 tggccaaaat ttagcatttt ctccttggct ttgataatca agtgagctta tataaataaa  
29521 aagtgcatac agccatacat aaatgatag cttatcgtct ttaatttctt ctggaatttt  
29581 aatacccaa tcaaagcttg ttcgagtgat agaaagatct ttaagtccac tttggacaaa  
29641 attaatcaat tcattttttt tatttttagg taagatagga tcttctttat cataccactg

29701 aagaatccta tcttgatatt ttgaaagttt aaaaaataa ctttcttctt ttaataaaga  
29761 agtatccttg ccacaatcag gacaccaca ttcgtttata agttggcttt ttgcaaaaaa  
29821 actttcacat gaaatacaat aatgccctc atattcgtcc ttataaatat ctcctttttg  
29881 ccacattttt aaaaacatag ctttaacaaa atcaacatgt ctagcatcgg ttgttcttgc  
29941 atatatatca taagtgattt caaactcatc ccaaagtttt ttaaattcag aactgatttt  
30001 atcagcatat tcttttgggg tcgagtttct tatttttgct gcttgttcta ttttttgcc  
30061 gtgttcatca gtgcctgtta ataatcgagt ctcatgccct tgcaaacgat aaaatctagc  
30121 caaagtatct gcaatgatag tagtgtaagc atgtcctaag tgaggcacat catttacata  
30181 ataaattgga gttgtaagat aacgcatttt attcctttaa aaatcaaac cgccttcggt  
30241 tttaccctta gacatactat tataaacgc atctacataa tcttttctcg tagagcaatt  
30301 aaaaatttca tcgcaattat agcaagactt taagcctttt gagctttgac aagagcttaa  
30361 aatttctttt tttttatcta aatcctgttc aaactcatct cttatttcac tcattataag  
30421 ctttaaaaag ctctgaaatt tcatattttg aaccaaaaaa gcaaggtgtg gttgcgtgaa  
30481 tttcatcaaa atcaagctct agcaaagaat gattttttcc atttgtgggt ttacctcctg  
30541 ctttttctat aataaatgct aaaggaaata cttcaaaaaa agcacgcaat ttacccttag  
30601 gtgcatcgct ggttgctgga tagctaaaaa gccaccacc ttttaagtaa atttgattga  
30661 tatcgcttac catagcccct gaatatctta aacgataacc ctcatcgaat aattttttga  
30721 taaatttagc atgcttttct tcccaaaatt tttgagtacc gcctgtggca ttgattttac  
30781 ctttttcttg catttgaagc tctttgacaa aagcaaattt atcattttta tcaagacgat  
30841 aaagttttgg cttatcttct caaataacaa gttctaaacg agcccatac atactataaa  
30901 ggcagccttt taaattttta ggccttgctt tttcttcata aatggcaaaa atagaaccta  
30961 tagcaaaatt aacatccatc aagcttgagc catcaagtgg atcgtaagcg acaacaaatt  
31021 tcgcattttc attgatattt aaaatctcat ctttttcttc actaatgata gctttaatac  
31081 tagggcattg gcttaaagta tttgtgataa tctcatcact taaaacatca aatttaagtt  
31141 gagtatcacc tgtggagttt tggttttgac tatagcttgt atcgggaaat tttaaagcat  
31201 ttgaaatttc aatcactgct ttttgtatat aggaaataag ttcttgcatt ttataattct  
31261 cttgtaaat tttttgcatt ttttaaaata taattacaaa ttccttgcac atcgtttaaa  
31321 tcaagccaag ttaaattcgg ataagaatca attttttcat agcttgcgat agcattagaa  
31381 aaagcaaaat agctttcatc aatttcttta taaaaaacac ttatacgtgg caaatctaag  
31441 gtttttaatc cctcaactaa acataaatca aaatcaggtg ctattttcaa agcacttaaa  
31501 atatctcttt tttcatgcga gaaaaaagtt gtacgagtag ggcttaaaac catcacttca  
31561 gcaccacttt gaaaaaattt aaaactatcc ttgccataga catcaaattg agctttatct  
31621 gcaggatcat gtttgataat caaaactttt aggttttgtt ttataaattc atttgcaatt  
31681 tttgtgatta atgttgtttt gcctgaattt gaaggaccac taaaagctat gattgatttt  
31741 ttcattacta ttttcctaaa ataaaatgta aattatagta ttttaacca aaaaatagag  
31801 ttaaaagggtt aaaatataga aaaaaattag gaaaaaatatg aagatttata ctttagctct  
31861 tgcaatgtta gtttttagtg cttgctcttt aaaggaagaa gcgatagtag atgcaaattt  
31921 aaaaactcaa actttaatgt ttgctcaaaa atacaaaatc actcaagata aattaaatgc  
31981 tataattact atgtcttatt taaatcctat tttagataaa gccagtcaag atgatatctt  
32041 tgctttgact atcactcctg atactttgaa gatagaaaat ttagaaattt ttatcaatga  
32101 aagaaaagct aagatagaag aacttgatga agagtttttt aaatatttaa taaaaatcg  
32161 ctatactcaa tatctaaaaa tatctcttcc aagtgtaaaa gaagaaggta aaattacagc  
32221 taagatttgt ttgaaccagc taccttgttt cgagttaaat tttcaaaaat atccgaaatc  
32281 cttatactat cgttcagaag acgtcgatac acaatataat tagccaatac tttttttcca  
32341 taaattcgac tttcttgata aggaacaaat tccatagaca agaaaggctc aaatttacct  
32401 tgttttaaca tatcatctct tgcaagcata cgtttggtta agcctatacc tccattataa  
32461 gcataagcga taaaaagagg cgaatctaaa tgtttttcta aataatttaa atgatgattt  
32521 ccaaaataat aagcattttt tggctcaaac ataaaaatctt gatcaaaatt tggaaatttt  
32581 aactctttct caccaatata attggctaaa aatggcataa attgcatcat gcctaaagca  
32641 taagaaaccg atatagcagt agggataaaa cgactttctt gtctagcaat agccaaaata  
32701 agcgcttgtc ttggagtact ataactttta atgtattcat aataaggcat tataaaataa  
32761 tggtttttaa atttcgactt tctttctaag atataagcat agataggcag agtttctttt  
32821 gagtcaaatt ctttagccaa tctatcaagt tcgcttgcac tagcttcgag aatttgtttg  
32881 ttgagttttt gccatgcgaa aggatcttgc atattgaaat tgtttttttt cttatttcta



32941 gaatctatga cttcgattht aagaaattcg gaatttgta attcttttagc ataaagacta  
33001 tagatattta aagaagagct ttttagctaaa gtttgcaaat ctttatcatc ttttttaatc  
33061 atccacatcc aaaatatagc attatcttta ttgctttgca ttttaaaagt ttgtgctgct  
33121 ttggcaaaaga agttgtaagc cagttcctct ttattataag ctagggcatt aatgcctaaa  
33181 taaaaagcag aatcctcatt tacaatggt ggatctatth tttagcattga agccctaaat  
33241 ttaggattht ctttttttat gataatattt tgtgcaaaat tcttaaatcc tacatgagtt  
33301 ggcagcttat tagcaaagct agcattthaa tcaaaatcat attttttaga ataattacga  
33361 agtctaaaaa aaccattaac atcttcttht tgaatgatat aagccatagg ttcgggagtg  
33421 ttaaaagcta aaagtaaatt agccaaatcg cctctttgat gactgagtht ttgagccaag  
33481 gcacttcggc tagcattatc aaggcttgct ataaaggcta ttgagthta tcttacactt  
33541 tggcaagtht gatttgcatc aagtatatta gctttggtat agttgtagca tggagcgtat  
33601 ttagggtcga tgaaaattht tacaggaatt attttttcaa gttcggatth gattthtacct  
33661 acatagcggga agatatgaga atttaagcct tcagcctctt ttttgcttat tactttgtth  
33721 tccaaaagac gatagatata ataatcctta gctatggaat tttcttcttg ttttagcctt  
33781 tctaagttgt attgcttggc atttaaaaat gccaaagctta agctaagtaa gataaatatt  
33841 tttctcacia taagctcctt aagatatttc caagaaaaat actaagaaat tgtaaggcta  
33901 aaacgataat caaaggcgca agatctatgc ttcctatgcg tgttggaatt tttctcacta  
33961 aagcataagc aggagagctt agcttatata aaatttgaac gataggattg taaggatcag  
34021 gatttaccga acttaaaagc gctgtgatga tgataatcca agtgtaataa ttgataataa  
34081 tttgaatcac ttgaaaaata gaaataatca aagaatctac aaccattatt tatatccttg  
34141 ctaattcatt aatataatth tttatataag ggtaaagatc gcttaattca ggaccatggg  
34201 tatttcctgt taggataatth cttagaggca taaaaaattt tttaccctth aattgactth  
34261 tttctaagag atagctthta aactcttcat aactctcaaa aggctcgatt tgactcaaaa  
34321 gatctthtaa aattthtcat tctgattcaa attcattgaa atcttttagcg ccaaagatgg  
34381 cttctagtht ttctthgatt tctthgatgg tacttgcttc ttgggtataa aatttagcaa  
34441 gttgtgctag atctthgtth aaatttaaaag cagtgttgag tcttctatct gtcacatth  
34501 ttatatgttc gcgattgatt tgcaaaagtt ttttaagatc aaatcttgct ggagctthtag  
34561 aaattthgcc gatatcaaac cactcaattg cttcttctaa agtaaaaatt tcacgaggag  
34621 ttttattthc cagcatgata agataatthg cgatcgcact aggtaaaatt ccactctcaa  
34681 gtagccatth tactgaagaa tgagcctctc ttttgctcat tttcacgccc tcttcattta  
34741 agataatagg caaatgcgca taagtcatag ctttatcata acctaaactt gcgcaaatat  
34801 gttctthgtth tggagtatth gaaacatgat cttcaccgcg tatgatacag cttacattht  
34861 caagcatatc atctactgca caagcaaaat tataagtagg ggtcttatct gttcgcataa  
34921 tcacaaaaga atcgatattth tcaggctcaa aactcaattc tcccttgaca aaatctgtaa  
34981 atttcatagt gtgagtaggt tttthtaaggc gaattacaaa gggthtttca cattctaaaa  
35041 catcaatatc tgctaaatth tgacaagtgcc catcgtagcg atatgccttg cttgcttht  
35101 tggcgagthc tttthtagct tcaagthctt cttcagtaca aaaacaagca aaagccttht  
35161 tttcgcttac aagctthtaag gccattthgac gatgaaatth taaatthtca ctttgcatat  
35221 aataatgctg ccatgaaatg ccaaaaagat gtaaaatthc tthtaatthct tcttctthgc  
35281 ctattatatt tctagcctta tcggtgtctt cgatacgcga aatgaaatcc atattthttht  
35341 gtctagcgcga tatataatta aacaaagccg cgcgtaaatt tcctatatgc atatcgcctg  
35401 ttggagaagg tgcaaaacga tacatthgat aacctthgat tttatthaaa gcttattata  
35461 acagaaaaat ttatatggat attthaatthg ctttgctata attaggatta tgatatttht  
35521 tattthtctt ttcgthtcat tattgattth tggthtggca aatattthata tttataaaag  
35581 attaatthaa aaaatthtth tttthtaagta tctthataaa atthtthgcct ttgtthttac  
35641 tctgctthtatt ttagctcaag caatatttht aatctthctg agaaatgaa atthtaagtga  
35701 tacttggtat gaatthttag ctgcattgta tgcaccgact tattgtthtatt tttthataac  
35761 cttagcgtctt gattthtataa ggcttatttht aatgtthaatg ggtaagactc atataaaaata  
35821 caatcttacc ctgcgttctgc tttthgattth tgctatcata actthtagcag cagtatcgat  
35881 ttatacgagt ataaataatg ctataagagt acctgaaatt caaagtgtag atattcaact  
35941 tgctaaactt gatcgtgatt taaaaatagc tatgctcaca gatatacatt tgggtaaaaa  
36001 tttacataag gattthtthtag ataagcttht tgtcagggta aattthgcaaa agcctgatat  
36061 ggtggtthata gtaggggatt ttggtagatc aaatctthaa gaattthcaaa atttatctc  
36121 aaggctthaat gattthaaatt ctacctatgg aactthttht gctthtaggaa atcatgagta

36181 ttatcatgga atagaagaag ttttagactt gcttaaaaag tataccaata tgaaaatfff  
36241 actcaatcaa aatftagacc taggcftttat aaatatcgca ggacttgggg atftagcagg  
36301 gcttagtaag ggfttgatg ctcctgattt agcaagggtt aaggtagatt taaatacaag  
36361 caaacctagt atfttacttg cccatcaacc taaaacagcc ttgctfttatg atfttaagtga  
36421 tfttgatcft gftttaagcg gtcatacgca tgggggacag atftttcftt ftatgftcft  
36481 agtaaagcft cagcaaggft ttatacgcg acftttataat ttgggggaaa atactaaact  
36541 tfttgfcagt agcggggcag gattftgggg acctagtctt agagftftttg ctcccaatga  
36601 aatfgcagtt ttaaattftga aaggftgaaa atgagftfttt ctaatgagag ftcaagaatt  
36661 tftggactta tagcagggat taaatftcct agftfttatac aaaaaataat caatgaaaaa  
36721 tatgttaatt atftttaagat cgatatgagc gaatftaaag ctccttatga gtatgaaagc  
36781 ttaaatgcmc tftttacaag atcfttgcaa atftcaagag agataaatga gggftfttata  
36841 agtccaagt atgggaaaat tfttagagtgt ggaagtgcft tfttgccaga taatacacct  
36901 tftgctfttt cgatcaaagg gcatacttat agcatagaag agctftttaa agatagfttt  
36961 aaaaaagagg agctagaaaa tggactftgat tatgttaata tctatctttc tccaagagat  
37021 tatcaccgct atcatagccc ttgtgatatg caaattftaa gtgcgactta tacaagcggg  
37081 gcgctfttata gtgtaaatga aaagcattft gagcgtatta gcaatfttata tgtaaaaaat  
37141 gaaagagtga gfttaaaatg tcaaaatgat aagggtattt tftggctftgt gftftgtaggg  
37201 gctcaaaatg taggaaaaat gcgftfttaag tftgatgcaa gcatacaaac taatgcgaaa  
37261 tfttctcata atfttacttag aaaatatgac aatftagaac ttaaaaaagg cgaagagfta  
37321 ggcaatfttt agfttagfttc taccatagft ttaatftctc aaaaaggact fttagatatc  
37381 aagcttaaa agcagcagaa tgfttaagftt ggagaaaaaa tagcggatta atftfttaggt  
37441 gftttatftt ccattftgata aataaaagca aatacttcag ctacagctft gtacatatta  
37501 ggtggaatft catctcctaa atctaafttt cfttaaaatft ctatcaaadc ctcatctftc  
37561 ftgataggaa ctccatgftc tfttagctaaa gagatgattt tagcagcact ftctcftttg  
37621 ccactcgcaa gaactfttag tgctgaatgt tfttctfttt gatagcctag agcaacagct  
37681 tftttgatag atftftfttat cfttactcata cftftfttatc cataccatt tcaagatcta  
37741 aatftfttagc atftctftgta tcaaatftac tcttatgat atctcctaca aagaaatftg  
37801 cacttaaaag tctgctfttg ftgatatttc tfttaagftc gtgggcattt tcatagatgg  
37861 tftttctaaa ftcaacattt tctgccatga tattgatadc tatatatftt tcatgtftta  
37921 aagagataag aatftccaaa tcaccaagct tagcaaatc aagftftgatt tgagcaaaaa  
37981 atftatctft tfttccacgc ctaaacadga tftftagaatc atctaaatcc tccaagaaa  
38041 agggtaggta ggtattgata gaatcgfttag ctaaagacat gagfttgattg agftcaatft  
38101 gcgccaaaag acgattggct tgattatata cagcttcatt accttcgftt ftggctaaat  
38161 ftgaaatftt taaaagggtt gattftacat catggtgtaa ggactcggct atatcttgct  
38221 cagftftftgg fttaatftgt gctaaatctt ftatggataa gfttaatfta gfttctaagg  
38281 tftftaattc tgctftgattg agftftagcat fttagagtgt gggfttcgagt tctfttaagc  
38341 fttcattgag ftftctftgaa agattgctta agctftftgct taaatcctgc actftgttcta  
38401 agtccaaat ctctacacta aaggctaaat tftftgacaat atftftgftt ataaatctt  
38461 gatftftftat gatgftftftga gtggftftggft gftftaattg ftgtgtattt tgaggattat  
38521 ftgtatftft cgatftgctt ggattattgt ftggattgtg agtftftftt gaagftfttat  
38581 ftctgftftt gfttctgtaa aatfttaggat ftctfttagc gatatfttct fttaatftftt  
38641 cftgftfttc atctftaatc ftatctftggft ftgaaagtga atftftftgta ftatfttctg  
38701 cftgattftc ftctgftftt tftftftgaa cfttagattt gctfttacga tfttccgftt  
38761 tagaatcaa atftftgatcc tctftftagat gaaagtctt fttagattct aaatggftct  
38821 cftftftgat atctftgctft acatctacat cattatcatc taatacattt tctftfttctg  
38881 gtgftftgagt gggctfttct tcactfttct cftftftftat atftagaatta ggactfttctt  
38941 cctcggftata ftcatcatgt ftgacgatgt cftctftftt agtctfttgc tctctftftga  
39001 tatfttcat fttaatgggc tcaftftftaa gftfttctft ggaatfttaga agactfttcta  
39061 agatgctftc tftftgtggt gftftgggaa aatgatcgcc tagtatattt fttaaggftat  
39121 ftctaaatft tcaaaagcc caagcactft gftftaagag cftggtatct fttatcatta  
39181 aatfttctgg tctgftftaag gctfttaaaaa aatcattftt tattgcactt aatfttftt  
39241 caatfttact agctatagga agaatftftt cfttagatag actftgattt fttagcgatat  
39301 agftftftaaa atftcttagt ftftgagctta aatftcaaaag tgctfttaaaa gagctftftgat  
39361 ftaaaatftt cftatfttca tftftfttag aagaaatgat atftftftaat tctftftaagg

39421 tgtcttttagg gcttaaattt gcgtttgcaa gctgagctat ttgcgtattht agctttttcac  
39481 tactaagact tttgattgtg cttataagag agtgaaagct tttgggtaat aattcttcat  
39541 tcaaagcatc ttttaatttt gcttcaaaaa atataccga attttttaac aatgggtgcta  
39601 aattgctatt ttttatttca cttgcagggt ttaaaatttg atttaatttg tctaaaactt  
39661 gagtgaaagt atcgcttttt gcaagctctg tgcttaagac ttttaattca ttggcaaaat  
39721 taggggctag atttaaggtt tttccttggt tgagcatggg tgaatcagga tttttttgcg  
39781 cattgatttg atctaagagt ttattgacaa gttcttttaa ttttgtgctt gtttcatttt  
39841 ggacaagacg ggtttagcact tcctcatcgc ttgcattttt gtttaggcct aaattttggt  
39901 ttagggttg agaaagcga tctttgggat tgcctttgga atttagcttg tctttgctta  
39961 tcccactatc tgtttttatg tcattttttt gtgcatttgc aatttggctt gtaagctggg  
40021 tattaatcat caagcatcac catattacct ggttttttct taaatttctt atttaaaata  
40081 ttgggtttat taactgcaaa aaggataaga aatccaagag aagttatata aaaccaaaaca  
40141 aaaccatttg tattaataa ttgtattaaa aatcctaataa ttaaaggacc aaacaaagaa  
40201 cctaaggaat aacaaaataa aaccccgcgg cctaattcaa cgccttgatt tttatttggt  
40261 agcatatcat tagcccttgc aagagctaaa gcataaagac aaaaaactcc tatgccaagt  
40321 aaaataccta aaaaatattg tatatacaaa taaggtttga aaaaagcaaa gataagcata  
40381 gtgaaaaaac ctatgcttga acaagtaatg attgcaaatt ttcgtcccat tttatcagaa  
40441 atacttctca ctacaatttg agctaaaaat ccaccagaa ccccgcaaaa cataaaataa  
40501 gaaacttctt gagctccaaa gccttgtaaa agtataaata aagatgccat agaaaaaat  
40561 ccattaataa gcattccagc tataaaactt gtaacgatag ccaaaggagc tatgtcaaaa  
40621 attttaggta tggaaatagg acttggtgcg ggcaagacgg gttctttgat tttgattaaa  
40681 tttaaaggca gtgatgaaag taagataagc gctgcactta aaataaatat attatgcttg  
40741 ctcaaatcca aggcgataat taaaatcca atgccaaatg caagataaaa aacgatttca  
40801 taaaaaccta aaattctaga acgaacagca tttttacttt tttcattaag ccatgattct  
40861 atcaccatta aaagtccata atagcaaatt cctataaaaa atcttaaac tgcccaaaaa  
40921 acgagatttt cactaagggt atgaagcata gcagaaattc caaaaaccgc accaaataaa  
40981 ccaaaagatc ttatatgccc tatgagagag atgattttat gtgctccgat agtgcctata  
41041 agggctccta taaaaagca agagcttact actccaacag ctaaagaact ttctttattht  
41101 tcttttaaga taacacctat ggagcttact atcaaagcgt tacctgcaaa caaaaatgct  
41161 atactagcaa aaagtgtgt catggatcta atgatttttt ttggactcat atcttcttat  
41221 atacagcata aaaataaaaa cacatactag caaggatgaa attccacata tataagataa  
41281 aatatctaata ttatcttgat gatgtaaaaa taaaaatcct gcaactaaaa tcccataggc  
41341 tatcaactta aataaagcaa aaaacaaagt aaaaaagcgc aacctatctt taaaatttag  
41401 agttaaatcg tctttaatag gaataaattt aacaatccta ggtaactttt ttatcttttt  
41461 tatacaaaat aagtttggat aaataaaatc tttttgatga ttttttgctt gggttaggat  
41521 aaaattttta taattaaaat aagaagtaaa aacgatcaat aaaatgctaa aaaaagcaaa  
41581 ctcatagctt aaaattatat ttaaatttat ccatttaaaa ataacaagaa tgcaataaaa  
41641 caagatgtga atcaagcaca agataataaa aaaagctttt ttattttcca ttattttggt  
41701 ctttttgacg aattttctct tttataaact catctctttg ttcgaattct ccatagcttt  
41761 taacttgtgc tttataagct ttataaacat taagtattgc tgctgcaaca ccccaaaata  
41821 caccagcca aaaaagccaa gggtagggtg taaatttttt taataaatac cccacgcca  
41881 tcccgattaa aatagcaacc accatagaaa ttccaagact aagtcctatc gcggttctca  
41941 tagtcttgcg aatgattttt tgtcttttat ttgagaaagt atgattagaa tttttactca  
42001 tagtttttta aagctttcat atgtactttg tagggtttta tcgatatgct ctttattcat  
42061 ttttagcacag ataaatcctg tttcaaattg agaaggagct agataaattc catttttaag  
42121 catattttga tgaaatttag aaaagagttt aagatcagat tttaaagcat ctttataatt  
42181 atatactgga tcttgtgtga aaaaatatcc aaacatagag cctacatagc aagtttgtaa  
42241 agcgatacct ctttcatttg caagctcttt cattccctta gtaagttttt tagctaattt  
42301 tccaagttta gtataaagat cttttttctt tttggcttta gataaactag caattcctgc  
42361 ggccattgct aaaggatttc cgctaagtgt tcctgcttga taaactctc ctaatggact  
42421 taaaatatcc atgatttctg ctctagctgc aaaagctgcc gcaggtaaac cccacctat  
42481 aaccttgcca aaagtaacga tatctgcttg tatatgatta ataccataag agccaagata  
42541 tgaagctctg tatccactca tcacttcatc aaagatgagt aaggtatcgt tttctttaca  
42601 aattttggca agttcttcta agaaatcttg cttgccagga actaatcca tatttctgc

42661 aataggttcg ataataacac aagcaatgtc tttatTTTTc tcaaaaagct cttttacgct  
42721 ttctatatca ttataagttg ctactagggt atgctttgct acatctgcta aaaccctaa  
42781 agagctcggg gaattaaag tagcagcgcc acttccagca cttacaagta aagaatctga  
42841 atgcccatgg tagcaacctt caaatTTtag aatTTtatct tTTTtagtaa agccgcgagc  
42901 aaggcgtatg gcactcatag tgccttctgt accactgctt acaaagcgaa tTTtatctaa  
42961 atgcggaaag tcttctaaaa caagctcggc tagttgtggt tctagtaaag tCGgtgcacc  
43021 aaaacttgag ccctTTTTta aggcttcatt gcaagctttt aagatatctt tatcacaatg  
43081 cccaaaaagt aaaggtcccc aactttgcac ataatacaata tagccatttc cttctatatc  
43141 aaaaatataa gtccttacc catgagatat aaatctcggg tCGctttgta catttgcaaa  
43201 agcacgcaca ggagaattta cacctcctgc tataagattg caagctgttt taaaagcttt  
43261 tttgtttgct atTTTTgctc cTTTTtagat tgcttgatgt aattatataa ggTTataatt  
43321 tcatcattgg ttaatgaata atTTggcatg attgattttg catctttgct ttgattaaga  
43381 gaagttcgaa attcttcaaa actaagattt tgaatgcttg gaactttata ggctgtttta  
43441 actccatttt tcatataaaa acctagaatt tgttcgttc catcgtacc atggcatttt  
43501 ttgcaactaa taccctttgg atTTtcatag agcatttttg aatactcttt aagtgttatg  
43561 aatcagaag caaaaagatt taaaatagct ctagaaaata ttaaaacagc tttcaaaatt  
43621 tcaccttggt aatgaagttt taatatgata caatTTttac tttaaaaaag tgataaattt  
43681 ataaaggaaa agaatgactt tgcttgatgg taaagcttta agtgctaaga ttaacaaga  
43741 gcttaaagaa aaaaataaaa ttttaaaaga aaatggagtg cagacttgcc ttgcagtaat  
43801 tttagtaggc aatgatccag cgagtcaaac ttatgttaat tctaaagcta aggctgcga  
43861 agaatgtgat ataaaatctt tagtttatcg tttagatgaa aatacaactc aaaatgagct  
43921 tttagctctt atcaacactt taaatcatga tgatagtgtt catggaattt tagttcagct  
43981 tcctttgcca aagcatatca gtaaaaattt aatTTtagaa agcattatca gtagtaaaga  
44041 tgtggatggg tttcatccta ttaatgtggg ttatTTaaat ttaggcttag aaagtggatt  
44101 tttgccttgC acccacttg gcgttatgaa gctTTtaaaa gcttatgata tcaatcttga  
44161 aggactagat agcgttgtaa tCGgtgcttc aaatatagta ggtaggccta tggctaccat  
44221 gctTTtaaat gcaggttgta cagtaagtat ttgccatata aagacaaaag atttgagtgc  
44281 ttataccaaa aaagcagatt tgattatagt ggcagcagga tgtgttaatt tgcttcgtgc  
44341 agataggtc aaagagggtg ctattataat tgatgtagga attaatcgcc ttgaaaatgg  
44401 caaaatagta ggcgatgtgg atTTtgaaga ggtttcaaaa aaagctagtt ttataacccc  
44461 tgttccaggt ggtgtaggcc ctatgactat agcgatgctt ttggaaaaca cagtcaaatc  
44521 agctaaaaat agTTtaaaat caggaatata aatgaatttt tttaaaaaac tttataaatt  
44581 ttcacaatca tggacaggaa cggttgttat cgttctTTta gtgatctttt tcttcataca  
44641 agcctttggt atcccttcag gttctatgaa aaatacccta cttgtaggcg atTTTTtatt  
44701 tgtaaaaaaa ttcagctatg gaattccaac tccacatatc ccatggcttg aaattcctgt  
44761 tttaccagat tttgataaag atggacattt aatcaaagga caaagccctc aaagaggcga  
44821 tatagtgggt tttagaaacc ctaaaaacga aaaagagcat tttgtaaaac gctgtgtagg  
44881 agtgggtgga gatagaattg tttatgctaa taaaacactt tatgtaagaa tgcatgaggg  
44941 tgatgaattt atgaaagaac attatcctaa tgatttagca acccttggag ggcaaattta  
45001 tgtaaggag cttataaac aaaaagggat tcattatgat ttaaataaag acatagaagg  
45061 tgatattttg cgctttctta gcataggtga atttgctatg tcaccaacct atttcaagga  
45121 acttggaaat aatataggct ttagcgggtg caatgcctat gTTTTtgatg tagccgaaga  
45181 agaatatttt atggtaggcg ataatagaga ttattcttac gatagtcggt tttggggttc  
45241 tgtgccttat cgtttgatag taggtaagcc ttggtttggt tatttttcat gggatcaaga  
45301 taaaaatggt cgctgggaaa gaatagggcg ttttgttgat actTTtagaaa atgaagaaga  
45361 atatatccat gattatgatg atgaggataa attgagttga ttttgTTTTc tgcataagca  
45421 gtaaataaaa tcatcttgct atTTTTtatt tatttttcac aatcactaca aatacctttt  
45481 ataagcacgc ttttaatcgt acctttgact tttggcattt gaacatcgct aatTTtatgg  
45541 cacatatcgc aaacaaaatg tgccttagca tgatctgcta attcataaaa actTTtgCga  
45601 tttagctcac ttttactgac aatgcctttt ttttcaaaaa gttccatatt gcggtaaaag  
45661 ctagttttat tggctttgat attgaaatta tCGtaactta atggagcttt tgcaagagat  
45721 aaaatttgta ataattctat gcgcaggttt gttatagcta tatcatgttt ttttaataat  
45781 tcaagagctt ccataaaatt cacctttaa tatttaaat atactttatt gtagcataaa  
45841 aaaagctttg tagttgcaac ttttatTTta agttgcaact aagttgcatt ttgtataatt

45901 ttaaaaatat tttattataa ggaaaattta tgttgagaat tttattatta agtgtattgt  
45961 gtgtttttgc ttttgaaaaa cccataatta gcgtaagtat cccacctcaa gcttttttcg  
46021 tagaaaagat agctaaagac agcgttgaaa taaatatact cataccgcca aattcagacg  
46081 agcatactat ggaatttaag cctcaggcat tgaaaaaatt agagcaaagt aaaatttatt  
46141 tcttagcaga tttagagcct gaaaaaatct taggagaaaa atttaaaagt gtattaaaaa  
46201 atgtaaaaaat tgtaaatatt aatgaaggta tccatcttct tgaaggagga cacgatcata  
46261 agcatgaaca tgatcacgat catgatcacg atggacatca tgcagaagaa gagtatgatg  
46321 agcataatga ccctcatggt tggcttgatc ctattttggg taaaaaattg gcacaaaata  
46381 ttaccaagc tttggtgcaa agttttccaa acaacaaaga attttatgaa gcaaatttgg  
46441 ctaacttttt aaaagagcct gatcaaatgg atgctcaaat agcagagaaa cttaaaaata  
46501 ttaaaagaaa tgaatttata gtttatcatc caagttgggc ttatttggct aaaagataca  
46561 atcttgtgca aattcctgta gagattgatg gtaaagagcc taaaagcaaa gatttgcaaa  
46621 acctatcaa gcttgcaaaa gaaaaagata tacgcgttat ctttgttcaa cctggctttc  
46681 cagaaaattc agcaaaagtg ttagctaaag aattaaatgc tcaaattggt tctatcaatc  
46741 atttggctag aaattgggat gaagaacttc taaaaagtat ccaagcctta agttcggcct  
46801 tgcaatgaga gcgatttttg ttttaatttt tctagcttta agcaacttat attcctgcgc  
46861 cttgtgcgca acctatactc caaatgtgaa tgmtaatttg gattttaata taagcaatga  
46921 taaaatcaag caagtggata taagttggga attttcagaa gaatttttta atgttttact  
46981 tgaaaattat gactttaatt ataatgataa atttgatcct gatgagcttg aaattgtaaa  
47041 atacacactt ttagattata taaaacctaa acattttcta acccaattta gcttcaatgg  
47101 tttggaagaa aatataaata tcaagcaatt taaaaatccc aaactgcata tacaatctcc  
47161 tcgtttgta tttagctatc aagttgtttt agatatgcc attaaagaca ataacacttt  
47221 tagcgtgaaa attcatgatg atggaggatt ttttaatttt aatataataa atcaaaattc  
47281 cataagctta aattcgcaaa attatattat ttctagcatt gattcaaata ctgcatcttt  
47341 tgaatgtat caagggcaat tacctcaaga tgtatatata gataaaactc caacttcac  
47401 tctttcaaaa aattttttag aaaaattgat tgaatttaac aatacacttt ttgcccatat  
47461 taaagatata ttaagaaaag aatttgattt taaatccttt tttgttttat tgatgatttc  
47521 ttttgcatac ggtgtttttc atgctagtgc tccaggccat gctaaaatgc taacaagttc  
47581 gtatttttta acccataaaa gtacaccttt aaagatatgg tactttgtat ctaagatagg  
47641 agttgttcac atattgagtg cgtttttatt ggtaagtgtt ggagtagttt tgcttgagca  
47701 tttattaaaa gatgttaata atgaagctgg gtttgtattg actaaaatta cgagtttgtt  
47761 tattattttt attgctttat ttatgatcag taaaaagata ttaagcgata aaaagcaatg  
47821 ctgctgtact caccataaaa gcaatgaatg gggattataa cttagtctg ctttagtgcc  
47881 ttgccctgga gttgttttac ttatagtatt tgcttatgaa tttagttttt ggtatgcctt  
47941 aagttcggct ttatttatta ccttgggaat gagtttggtt ttgtttgctt ttgcattggg  
48001 ggcaaatcaa ttttacaaaa gcatttcaca tataaaaaata agaatctttt tagagtattt  
48061 tggacttatt gttatgtttt tatttggttt gtttttattt atcaatataa aaacaaatgt  
48121 gctataaaaa gaaatttcta gataaaatgg gtaaaaatatt ttttatctaa atctagattt  
48181 ttcaaatcat acataattaa caagcaagca tgtagtttat aaactatgaa aaaatgctta  
48241 gtgttttaaaa tcaattcaca taaaaattat ttataatat gcttatttta aacaaaggat  
48301 tattaaatga aaatcgcaat gataattcta agcttatttt ctttagtatt ttttaagtga  
48361 tgtgctttta aagaaaaaaa agcaagtgaa atagaaactc ttgcaagtaa ttatggtgga  
48421 atttatatct ttgataaaaa aataagagaa gagatattgg aaaatgaaag aaaaagaaca  
48481 gagttggaat atgatgataa atttagaact aaaataggcc aattaaaatc aggagaatta  
48541 atttataaga tagattctgc agctgttgat aaattgcttc cccaaatcct ttccaatggt  
48601 tgtaaatatt atcgtaatga ttataattat gatgtaaaag acccagatta tgattttaat  
48661 ttcgatgata aaccgaatt tgcatactat gaagatcaat ttaaagcata tatgggtgaa  
48721 gaaaactata aaaaattaag accttattta ggtatgacaa cttattatgt gtgtgagggt  
48781 agaaaatata ctgttgtttt tgctaccatg atagattata aagtaaaaaa ttatggatta  
48841 tttggagatg aaggaagagg atttagcttt tcaagcatta gtcgtaaaag tgcaggaggg  
48901 ggatcttttc attattttac taatggtaaa tttataaaaa gtgatgaaaa atatacagga  
48961 caaagttact gatgaatcct aaagaactta tctctcaaat caaagactag aagatataaa  
49021 ctataaagga taaaaatata tgaaaaaaca agctctatta ttttaatgat aaagaaaaag  
49081 ttatactgct aacactaac cacaaaaata catcttaatt ttaataaaat agagagtcta

```

49141 aggagataac ccatgacata tatattactt cttattataa tttctactat tctttcttat
49201 cttatattaa aatttattta taaaatcatc tttaaatcta aaaaaagtgt ttcaaagttt
49261 ttagtctttc ttggaagcat aggtttaatt atcttttatt atactcctta ttcttattat
49321 ttagagccaa gcttttataa gtttaaagaa atatgtaagc tagaccaga gatttaccaa
49381 gccaatggta gtaaattaga tgaggaatat tataataaag tgctaaggta ttttgatacg
49441 gatttgata atatgtcaaa gataaaaaca ttaagaataa gcgacgataa aaagcacttt
49501 tcatattggg ttgaaaaatg gattggagat agaatctctt ttgattttgt catttggttt
49561 aaaaatgaaa acgctacaaa agacaatatc aagaaagtta gcgtttatgt ttggtggcgt
49621 gatttacgac cattgccagc aggtaatgag ggggcaggat tctatctttc aggagatagg
49681 gaaaattgtg cttattttta aaaggaaata aatgaacaa taaagaacag attaaaaagc
49741 tcaaagataa tgccgaatta gcaatggcaa gttatgggta ttttcattta gcagataaat
49801 cctataatca taatgataaa tatgaaaagc gattaaagga atttagagaa cttaaagcaa
49861 aagcattagg aaaagaaatt gatgaaagta tttacccac ctacgcagat atactcgaca
49921 ttacctataa atactatctt gatgataatg gcaaaccxaa agatggcttc tttgatgatg
49981 agttatttag tggcgacttc tccccactcc aagctaaaca attcttttct tgctatgatt
50041 tattaaaca ttgtcctaata acaaattcag gtttttctgc tactttattt ggagaaaaaa
50101 gaaaacaaat tgatagtaaa actaaagaaa aaagctatac cagtgaatat ggctatatca
50161 attatatttt agctattaga g

```

//

LOCUS DMACINML\_12 47897 bp DNA linear 16-DEC-2020

DEFINITION Campylobacter species strain strain.

ACCESSION

VERSION

KEYWORDS .

SOURCE Campylobacter species

ORGANISM Campylobacter species

Unclassified.

COMMENT Annotated using prokka 1.13 from  
<https://github.com/tseemann/prokka>.

FEATURES

source

Location/Qualifiers

1..47897

/organism="Campylobacter species"

/mol\_type="genomic DNA"

/strain="strain"

gene

complement(234..689)

/locus\_tag="DMACINML\_01624"

CDS

complement(234..689)

/locus\_tag="DMACINML\_01624"

/inference="ab initio prediction:Prodigal:2.6"

/inference="similar to AA sequence:RefSeq:AAW35482.1"

/codon\_start=1

/transl\_table=11

/product="membrane protein, putative"

/protein\_id="Prokka:DMACINML\_01624"

/translation="MSYIFWVIICTSGALLLFLGLIAYLIISDDKKRNIKQKNTENTV

QARKIDSDLNKMIVAASDLKYSDSLKELAKLFVQTHKLGSKTSKELDEKTKNKLEFV

SALAAPKASPQTISFLNQLKISASYKKEIDAYEQMGLAKRKIKEEK"

gene

complement(689..3949)

/locus\_tag="DMACINML\_01625"

CDS

complement(689..3949)

/locus\_tag="DMACINML\_01625"

/inference="ab initio prediction:Prodigal:2.6"

/inference="similar to AA sequence:RefSeq:CAL35131.1"

/codon\_start=1

```

/transl_table=11
/product="putative cytochrome C biogenesis protein"
/protein_id="Prokka:DMACINML_01625"
/translation="MKNIIKSVGDLRISIVLFLLFALSCGLATFIESAYGTPTAWAMV
YDSFWFEYIQLLLGINLLFGMLRYKMFALKKIPLMIFHFSFLFILLGSAMTRYGGFEG
LLAIREHTQNALVESSKTSLRISTIKDGERYTSVNDRYIGNLPFANSFKLNLNMGDEK
AVLKYKNLILDADYVYKEDNISSPLLVLTVSEKNSQGANLEFRSGEVQNINGINFAM
NDDVAKPYIKIDKNLKLSSSENLVFNMKKGENSTLKIGEEANAKDLRLYSLDNLNFV
VKFASLHGTQEIQGVNRPQDESWLWFKSAWLEFARTVMISSFGEPQNWKASWLTNFK
EFAMSKDYQALELKGAAHALKLQLDYKNESKEFYVFEYNKPTVIELAGQKFFISWALAY
EQLPFEIYLRDFVLDYRPGSMSPASYASEITVKNNEDNFDYRIFMNNVLDYKGYRFYQ
SSYDQDEKGTILSVNKDPGKIPTYIGYFLLCLGMFLNFLNPHSRFRTLARLINKDALK
HTASALVLFVALFGADKMLAQDLNINLEQNMPIVDKTHVKELKALIVQKSV DGRMIPF
DTLAREILEKIHKSADYKGQEASAIMLSMLINVDLWQNEAFILMPSNKNVREIAIEIL
EISP ELKYVKYKDFDANNRYKLQKYVENANRKNPNARGVFDKEIINLDERANVVNLV
FSGELFKFIPIQNHNNAWLAPFSAITTLKGEEGFVLALIKNYFSSVDTAFHDGNWT
RANESLGLIKQYQEKIGHEVMPNKTKVEMEIFSNAEIVFKLAPVYLIAGFLLLVLL
VKMVAPKLKISLIFKIIYILNIFAFIHTIGLGLRAYLADHAPWSNGYESMVYIAWAL
SLSGIFFSRKSPIALSLSILAGIVLAVAHLSMN PQITNLMPVLNSYWLSIHVSVIT
ASYGFLGLCSLLGIFTLILMCF LKENNQNSILRNITEATRINEMSMIFGLCLLTVG
NFLGAIWANESWGRYSWDPKETWALVSILVYAAILHIRMIPKYSNQFTFALWSMFAY
WVIMTYFGVNYFLVGLHSYAAGEAAQIPSYVYWGIAIMIVLALLARRKREFV GKL"
gene complement(3965..4660)
/gene="livF"
CDS /locus_tag="DMACINML_01626"
complement(3965..4660)
/gene="livF"
/locus_tag="DMACINML_01626"
/inference="ab initio prediction:Prodigal:2.6"
/inference="similar to AA sequence:RefSeq:EAQ72193.2"
/codon_start=1
/transl_table=11
/product="high affinity branched-chain amino acid ABC
transporter, ATP-binding protein"
/protein_id="Prokka:DMACINML_01626"
/translation="MLVVKNLHVYGLIEAVKIDFKVETGHIVSLIGSNGAGKTSTL
NALLNAVKRTGEVNF LGYDTRHLTHTLVQKGIALVPEGRRVFINLSVEENLKIGAYN
NSENYEHLREQMYKLPRLANKKHAMAGNLSGGEAQMLAISRALMSEPKLLMLDEPSL
GLAPKIVGEVFDIIVRLKEEGITILLVEQNAYSALKISDYAVLENGLIAMQGEAKKL
IGDDNIRKKYLGL"
gene complement(4647..5417)
/gene="livG"
CDS /locus_tag="DMACINML_01627"
complement(4647..5417)
/gene="livG"
/locus_tag="DMACINML_01627"
/inference="ab initio prediction:Prodigal:2.6"
/inference="similar to AA sequence:RefSeq:CAL35133.1"
/codon_start=1
/transl_table=11
/product="branched-chain amino-acid ABC transport system
ATP-binding protein"
/protein_id="Prokka:DMACINML_01627"
/translation="MILELKNITKNFGEVRAINETSFHIKEGEIFALIGPNGAGK TTL

```

```

FNIITGNYKPTSGEVFFQDKKINDLKPHKIVHLGIARTFQNIIRLFSSMSVLENVMI GF
DKQMKYSVLEAFHLGRFHRVEQEFKNKAYKLLLEELGISEFADEKATSLSYGQQRKVE
IARAMATNPKLLLLDEPAAGMNSSESELAELILKLRKDYKISVLLIEHDMKFVNKLC
DKVLVLDYGKTI FEGKISDAVNHKEVIAAYLGDFDASS"
gene      complement(5414..6457)
          /gene="livM"
          /locus_tag="DMACINML_01628"
CDS      complement(5414..6457)
          /gene="livM"
          /locus_tag="DMACINML_01628"
          /inference="ab initio prediction:Prodigal:2.6"
          /inference="similar to AA sequence:RefSeq:CAL35134.1"
          /codon_start=1
          /transl_table=11
          /product="branched-chain amino-acid ABC transport system
permease protein"
          /protein_id="Prokka:DMACINML_01628"
          /translation="MVRIKISALVYIILAI AFIMLAPQFFDGYGIGILNQIAIYITLA
VSYNLINGVTGQFSLEPNGFIAVGAYAAALVLLSSEQKLDLFSLENPNPIILALHTNS
FVLALLVAGFSACVLSLILAFVFRVRGDYLAIVTLGFGI IQKLAINFPSWTNGSMG
LNGIPLLSNLYWTGGVAIISVVLILNLVYSKFRAMKAVRDEDEAASAMGVNTFWTKT
LAFGTSAFLEGVGGGLLVCLLASVSPEQFGFEFTFMLLIIIVLGGLGSTTGAILGAIL
IIGGREWLRFLDEM QIKIDFLGIDMGSPGLRMVVFSLILILVMLFARRGVFGDKELN
SFFKRPSKKGCKK"
gene      complement(6460..7419)
          /gene="livH"
          /locus_tag="DMACINML_01629"
CDS      complement(6460..7419)
          /gene="livH"
          /locus_tag="DMACINML_01629"
          /inference="ab initio prediction:Prodigal:2.6"
          /inference="similar to AA sequence:RefSeq:CAL35135.1"
          /codon_start=1
          /transl_table=11
          /product="branched-chain amino-acid ABC transport system
permease protein"
          /protein_id="Prokka:DMACINML_01629"
          /translation="MDSTLFLQQLVNGLSLGS MYALIAVG YTMVYGVLRRLINFAHGDI
MMVGAYIALLLINFFSPIINHLNQTFFGSDELGKYL VVIFVAALVASMIFSSIVGILI
DKIAYKPLRKAPRISLLITAIGISFFLQNLFNVI FTSTEQQFPAPP I FETLVSIGSVS
TTLGSELLVPLVTLIVMLGVLFILYKSKYGI AIRALAFDIQTVNLMGINANRIIAIVFA
LGSALAALAGIFWSSNYYSVYPTMGTLVGLKAF AA AVLGIGSVVGAVLGGLIIGLTE
VMAVAFFPELSGFKDAFAFIFLVFILLFRPTGILGINFEKSRF"
gene      complement(7427..8536)
          /locus_tag="DMACINML_01630"
CDS      complement(7427..8536)
          /locus_tag="DMACINML_01630"
          /inference="ab initio prediction:Prodigal:2.6"
          /inference="similar to AA sequence:RefSeq:ALW62109.1"
          /codon_start=1
          /transl_table=11
          /product="branched-chain amino acid ABC transporter
substrate-binding protein"
          /protein_id="Prokka:DMACINML_01630"

```



```

/translacion="MKKKIILAAALALS LQAKEVNLGVVPLSGATAAYGQSALEGIK
LANEMQSTLDNGDKINLVLDTKGDKIESASAATRLVNQDKVLGLIGEMVTANTLQVM
RIAENKVPLIAPAATGDKLLENKLYSSRVCFMDSFQGS SLAKYAFEKLNHKKAVIVV
DQSTDYSLGLAKAFEKEFKAKGGEILKTLRVNSGDKDFKAIATQIKILNPDFIFLPLY
YSEASLFVRQAKLIGLNTPMGSADGVADATFVKLAGNASEGYIFTDSFDANNPTTQLS
KDFIAKYAKENQSKEVPNFTAMGADAYFVMFNAMNACQNTLTSECINEKIHQTNNYEG
VSGVISIDKSGNATRSVVVKEIKNQKQTYKDTINP"
sig_peptide complement(8477..8536)
/locus_tag="DMACINML_01630"
/inference="ab initio prediction:SignalP:4.1"
/note="predicted cleavage at residue 20"
gene complement(8546..9661)
/gene="livJ"
/locus_tag="DMACINML_01631"
CDS complement(8546..9661)
/gene="livJ"
/locus_tag="DMACINML_01631"
/inference="ab initio prediction:Prodigal:2.6"
/inference="similar to AA sequence:RefSeq:CAL35137.1"
/codon_start=1
/transl_table=11
/product="branched-chain amino-acid ABC transport system
periplasmic binding protein"
/protein_id="Prokka:DMACINML_01631"
/translacion="MKKITLVFSALALANCLYAKTINLGVVPLTGPVAAAYGQDVFNG
IELANKLNKLDNGDEVKLIVIDTKGDKLETTSAVNRLIAQDKVLGIIIGEATTPNTIQ
AISIAEDKKIPLIAPVASGDKLLDNKKYASRVCFSDFSQGDKFANYVTKELNFKNAV
IIDQSNVYSLGLAKAFEKSLKENGKVIKLAISSGDKDFRAVVSQKSLNPDFVYMP
IYHPEAALIARQAKQIGFDKLLAAGDGVNNQTFIDLGSTAVNGVIFTDSFDSSNPSTA
RGKTFINEYEKIKGNRNLPAFSAMGADAYVMLNAMNACQNTLTSECINEKIHQTSNY
EGVGGIISIDASGNAVRPVVIKEIQDGKQVYKTLINP"
sig_peptide complement(9602..9661)
/gene="livJ"
/locus_tag="DMACINML_01631"
/inference="ab initio prediction:SignalP:4.1"
/note="predicted cleavage at residue 20"
gene complement(9697..10128)
/locus_tag="DMACINML_01632"
CDS complement(9697..10128)
/locus_tag="DMACINML_01632"
/inference="ab initio prediction:Prodigal:2.6"
/inference="similar to AA sequence:RefSeq:CAL35138.1"
/codon_start=1
/transl_table=11
/product="putative cytochrome C"
/protein_id="Prokka:DMACINML_01632"
/translacion="MFRYLAVFSVFVVALFGINLKSFFTYTFDANKQYDMVQAKDLYF
KNKCNTCHGDNAEKS SVGSRTLKDMSPEDIKAALVGYTLDGSTANASQMAFYARNLS
HDDMDNIIAYIKGGNFAVDLQVKDLLEEPAQKTKHNTFLK"
gene complement(10138..10338)
/locus_tag="DMACINML_01633"
CDS complement(10138..10338)
/locus_tag="DMACINML_01633"
/inference="ab initio prediction:Prodigal:2.6"

```

```

/inference="similar to AA sequence:RefSeq:CAL35139.1"
/codon_start=1
/transl_table=11
/product="putative periplasmic protein"
/protein_id="Prokka:DMACINML_01633"
/translation="MKKLVILLAVINVLTFSYAAPLDEVFKDVEVSGVVRVRYRYETQR
VKKTDNKNKKHNVTRTEITIK"
sig_peptide complement(10276..10338)
/locus_tag="DMACINML_01633"
/inference="ab initio prediction:SignalP:4.1"
/note="predicted cleavage at residue 21"
gene complement(10393..10899)
/locus_tag="DMACINML_01634"
CDS complement(10393..10899)
/locus_tag="DMACINML_01634"
/inference="ab initio prediction:Prodigal:2.6"
/inference="similar to AA sequence:RefSeq:CAL35140.1"
/codon_start=1
/transl_table=11
/product="putative integral membrane protein"
/protein_id="Prokka:DMACINML_01634"
/translation="MLEKIFESLLVKSRIVTILPVIFGLVGFVLFVFFIASYDVLKVI
L
YTYQYFFSISVKIDLHEDVVALIIGAVDLYLMALVLFIFSGVYELFISEIEEFKQTK
QSKVLEVHSLDQLKDKLAKVIIMVLVNVFFQRVLQMKFATPTDMAFLAGSILALCVGL
YFLHKGGH"
gene complement(10913..11944)
/locus_tag="DMACINML_01635"
CDS complement(10913..11944)
/locus_tag="DMACINML_01635"
/EC_number="1.2.1.11"
/inference="ab initio prediction:Prodigal:2.6"
/inference="similar to AA sequence:RefSeq:CAL35141.1"
/codon_start=1
/transl_table=11
/product="aspartate-semialdehyde dehydrogenase"
/protein_id="Prokka:DMACINML_01635"
/translation="MSKKQKIAIVGATGAVGEELNLVDELDFPVESILPLASAKSAG
NQIEFRGKSYKIKELTEDEVFRENVPDIAFFSAGGSISEKYAKFAVEAGAVVIDNTSHF
RMEKDVPLVPECNPEDIKWKKTGIIANPNCSTIQMVHILKPLNDAFDLKRVDVSTY
QAASGAGKEGMEELVRAMQSFFAFKLDEFEAQTFPHTLALNLIQIDVFMNGYTKEE
LKMINETQKILHKNLEISATCVRVPVLRSHSEAITMHFAKEVDVNKARDILQNAPSVI
VMDEPKDKKYPMLMTSDTNETYVGRIRLDVTHKNILHLWCVADQIRVGAATNAVRIA
QKWLELENK"
gene complement(11944..13242)
/locus_tag="DMACINML_01636"
CDS complement(11944..13242)
/locus_tag="DMACINML_01636"
/inference="ab initio prediction:Prodigal:2.6"
/inference="similar to AA sequence:RefSeq:ASE89851.1"
/codon_start=1
/transl_table=11
/product="sigma-54-dependent Fis family transcriptional

```

regulator"  
 /protein\_id="Prokka:DMACINML\_01636"  
 /translation="MNLVIVEDDINMRKSLEIALGEYEEFQIKSYKSATEALKKIDSD  
 TDLIITDINMPGIDGLEFIKACENKYDFIIMTGNATLNRAIEAVRLGVKDFLTKPFDI  
 ETLVEAIKRAKVIREKTADKKVKKQEENQENGFSSSDKLEQVLNLSQKAAKTDA SVM  
 LFGESGVGKEVFSRFIHENSKRSQKPFVAINMAAIPSNLIESELFGEKGAFTDANAT  
 KIGLFEMANNGTLFLDEIGEMPYEIQAKLLRALQEKEITRLGSTKSIKIDVRIISATN  
 ANLQDKIDKGEFRSDLYRNLTVPINIPPLRERKEEILGIAQKVLNCTEYEFEMKK  
 LSQEAQKALLEYNFPGNIRELISIVQRACILSEGLEISEQDLFL EARSVKKDVKNLEK  
 ELLEQILEQCEFDKEKASNELGMSVENLNKIKQYKIKEK"

gene complement(13291..13740)  
 /locus\_tag="DMACINML\_01637"

CDS complement(13291..13740)  
 /locus\_tag="DMACINML\_01637"  
 /inference="ab initio prediction:Prodigal:2.6"  
 /inference="similar to AA sequence:RefSeq:CAL35143.1"  
 /note="hypothetical protein Cj1025c"  
 /codon\_start=1  
 /transl\_table=11  
 /product="hypothetical protein"  
 /protein\_id="Prokka:DMACINML\_01637"  
 /translation="MERIVCLLIFFSFKLIAQDEFIFWAELSNKNLILFHQSQNLSPA  
 MTRSKDTISEFACEISYTENDLKKLPRTLMIDDDMPKAIKFDLNAHKDELGDCFM  
 GAKISVKDIVKTDLLKAQNETYVKILPLRFSVEFGERSALIYYLKKK"

gene complement(13716..14237)  
 /locus\_tag="DMACINML\_01638"

CDS complement(13716..14237)  
 /locus\_tag="DMACINML\_01638"  
 /inference="ab initio prediction:Prodigal:2.6"  
 /inference="similar to AA sequence:RefSeq:CAL35144.1"  
 /codon\_start=1  
 /transl\_table=11  
 /product="putative lipoprotein"  
 /protein\_id="Prokka:DMACINML\_01638"  
 /translation="MKKFYFMLVIAGIFAGCTASTNNTTAKNPNNASTSAQASDIVVQ  
 KVDKDDVRDIREEKMLAPDVSESELSFSAVGEGIAPLNTVSSAQALALAKRAAITDA  
 YRQLASKLYGVKVNKDTVKDAMLRSSITAQVNGLIKNASIIDENFNQGLYRVNVEL  
 KIDADKWKELFAY"

sig\_peptide complement(14157..14237)  
 /locus\_tag="DMACINML\_01638"  
 /inference="ab initio prediction:SignalP:4.1"  
 /note="predicted cleavage at residue 27"

gene complement(14302..16872)  
 /gene="gyrA"

CDS complement(14302..16872)  
 /gene="gyrA"  
 /locus\_tag="DMACINML\_01639"  
 /EC\_number="5.99.1.3"  
 /inference="ab initio prediction:Prodigal:2.6"  
 /inference="similar to AA sequence:RefSeq:CAL35145.1"  
 /codon\_start=1  
 /transl\_table=11  
 /product="DNA gyrase subunit A"

```

/protein_id="Prokka:DMACINML_01639"
/translation="MENIFNKDSIELIDIENSIKSSYLDYSMSVITIGRALPDARDGL
KPVHRRILYAMNDLGVGSR SAYKKSARIVGDVIGKYHPHGDTAVYDALVRMAQDFSMR
YPSIDGQGNFGSIDGDGAAAMRYTEARMTILAEELLRDIDKDTVDFVPNYDDSMSEPD
VLPARVPNLLLNGSSGIAVGMATNIPPHSLNELVDGLLYLLDHKDASLEDLMQFIKGP
DFPTGGIIYGKKGII EAYRTGRGRVKIRAKTHIEKKSNDIIVIDELPYQTNKARLIE
QIAELVKEKQIEGISEVRDESDREGIRVVI ELKREAMSEIVLNNLFKSTTMESTFGVI
MLAIHNKEPKIFSLIELLNLFLNHRKTVIIRRTIFELQKARARAHILEGLKIALDNID
EVIALIKNSPDNATARDSLVAKFGLTELQANAILDMKLGRLTGLEREKIENELAE LMK
EIARLDEILKSETLLENLIRDELKEIKNKFVPRITQIEDDYDDIDIEDLIPNENMVV
TITHRGYIKRVPSKQYEQKRGKGKLA VTTYDDDFIESFFTANTHDTLMFVTD RQGQL
YWLKVYKIPEGSRTAKGKAVVNLINLQADEKIMAIPTTDFDENKSLCFFTKNGIVKR
TNLSEYQNIRSVGVKAINLDENDELVT AIIIVQRDENEEIRLLDDDSLNDENINSDENL
IESIKGKMLFAVTKKGMCIKFLAKVREIGRVS RGVTAIKFKEKNDELVGAVVIESDE
QEILSISAKGIGKRTNAGEYRLQSRGGKGVICM KLTDKTKELISVVIVDESMDLMALT
SSGKMIRVDMQSIRKAGRNTSGVIVVNVENDEVV SIAKCPKEELEDELGDENLDLNL E
"
gene      complement(16912..17487)
          /locus_tag="DMACINML_01640"
CDS      complement(16912..17487)
          /locus_tag="DMACINML_01640"
          /inference="ab initio prediction:Prodigal:2.6"
          /inference="similar to AA sequence:RefSeq:CAL35146.1"
          /codon_start=1
          /transl_table=11
          /product="putative purine/pyrimidine
phosphoribosyltransferase"
          /protein_id="Prokka:DMACINML_01640"
          /translation="MKCLNCGVFTLLCFCHHCAEELSEFSLGVRELEKDFKVYSFYKY
HEIKHLLHAKHKFYGYFVFHFLAKLSFFKFKNFFSVNEQINVIPLDDRVENLLYSHSA
ILAKYLKTESIKPVFGALHAQNHLKYSGKSLKFRQDNKRNFKLLKKINNPVILVDDIV
SSGSSLLEAKQFLEKNKISVLFVAVLADAKV"
gene      complement(17484..18128)
          /gene="mapA"
          /locus_tag="DMACINML_01641"
CDS      complement(17484..18128)
          /gene="mapA"
          /locus_tag="DMACINML_01641"
          /inference="ab initio prediction:Prodigal:2.6"
          /inference="similar to AA sequence:RefSeq:CAL35147.1"
          /codon_start=1
          /transl_table=11
          /product="putative lipoprotein"
          /protein_id="Prokka:DMACINML_01641"
          /translation="MNKKILFFIALALFLNACASKQNTFTQVNQLSKASECVPCESSS
GFEAKIKGLLYSDIGIQCCANKRTLDTGVALKKVYLHRFYDLKEEQKVLNANGQKLF
VNLDNFNAV FYVYLKQELEARGIIVLDDNKANSPYVTKIDLAFIGYSAKQDSLGLHSRL
VGVLSLNDINRNKKFTLRTKQDVQGFENLKD ISFYTHLLIKQMANKAASIISEL"
sig_peptide complement(18069..18128)
          /gene="mapA"
          /locus_tag="DMACINML_01641"
          /inference="ab initio prediction:SignalP:4.1"
          /note="predicted cleavage at residue 20"
gene      complement(18216..20012)

```

```

/ gene="lepA"
/ locus_tag="DMACINML_01642"
CDS complement(18216..20012)
/ gene="lepA"
/ locus_tag="DMACINML_01642"
/ inference="ab initio prediction:Prodigal:2.6"
/ inference="similar to AA sequence:RefSeq:CAL35148.1"
/ codon_start=1
/ transl_table=11
/ product="GTP-binding protein"
/ protein_id="Prokka:DMACINML_01642"
/ translation="MSVKNIRNFSIIAHIDHGKSTLADRIISECGAISDRQMSSQVMD
TMDIEKERGITIKAQSVRLNYKFNNENFILNLIIDTPGHVDFS YEVSRLASCEGALLV
VDASQGV EAQTIANVYIALENNLEIIPVINKIDL PNADVEKVKHEIEHIIGIDCKEAI
CVSAKTGVGIKELIETIITKIPAPKTDDEAPTKALIYDSWFDNYLGALALVRIYEGSI
TKNDEVLVMSTEEKHIVQDLFYPHPLSPIKTQSLQSGEVGVVVLGLKTVGDVQVGDITI
TLVKNKAKEAIGGF EKAKAFV FAGLYPIETDKFEDLRDALDKLKLNDSSITYEPETSL
ALGFGFRVGF LGLLHMEVIKERLEREFNLDIATAPTVTYIEIYQTDGELIKIQNPSEL
PPV NKIDHIKEPYVKATIITPSEFLGNLITLLNRKRGVQVKMDYITPERVLL EYDVPL
NEIVMDFYDKL KSLTKGYASFYEP IEFRVGDLVKLDIKVAGENVDALS IIVPNEKAQ
SKGRELVSAMKEIVPRQLFEVAIQASIGNKIIARETVKSMGKNVTAKCYGGDITRKRK
LLEKQKEGK KRMKAIGKVNLPQEAFSLVKID"
gene 20141..21424
/ gene="cmeD"
CDS / locus_tag="DMACINML_01643"
20141..21424
/ gene="cmeD"
/ locus_tag="DMACINML_01643"
/ inference="ab initio prediction:Prodigal:2.6"
/ inference="similar to AA sequence:RefSeq:CAL35149.1"
/ codon_start=1
/ transl_table=11
/ product="outer membrane component of efflux system
(multidrug efflux system CmeDEF)"
/ protein_id="Prokka:DMACINML_01643"
/ translation="MFKKYLTLIHKAILVFLPLSLSASNLREFIALSQTNEQYLIKQ
MQSEQASLSRSQTRNYLPSLSLNSAYIANNKDYFIINPKESLFAKLSLNL LLYDGG A
REANLRALESKEKLSLLDKEQSKNYLALSAITLYFN TLSLEKILLANKQKVEFLRSTF
ERLQKFHDAGLSPKDELESIKAKYHLSLELSQNELKLT SIQKEIRILSNTNFTPSGN
AFLENPNQEK SQSYEVLIAKEQINLAKESVNLAKAEYFPKFYIQDNFGFYKNNYSPEI
PVYYQNVADRFLQKYSQNNQF ILGVWKIFDFNARAKEVEKERLNVQIANANARLSER
KNKEELNYINQSLKVLKQIYTLNLSLNAANLAFESVDK KYQAGLVSYVEYLQALEAK
FKAQSDLELAHNEFEITKANYF NAGIDLNSKVRE"
gene 21421..22161
/ gene="cmeE"
CDS / locus_tag="DMACINML_01644"
21421..22161
/ gene="cmeE"
/ locus_tag="DMACINML_01644"
/ inference="ab initio prediction:Prodigal:2.6"
/ inference="similar to AA sequence:RefSeq:CAL35150.1"
/ codon_start=1
/ transl_table=11
/ product="membrane fusion component of efflux system

```

```

(multidrug efflux system CmeDEF)"
/protein_id="Prokka:DMACINML_01644"
/translation="MKVIVFLIFIFNLAFSEEIYASFNVEAAKQSKLALLESMLVEQI
PVKIGQRVKKGELLSLEQTSEKISLQNAQNSYKLALIEFENTQSKMKKFAVENVID
KQSYEDMKAKFEAANLNLTKAKINVEYYKNILAKKELRAPYDAIVSNKFIQIGEGVGG
VAQPLIEIFSYPQSKLVLSFDERYKDQVKIGDEFYKIDQSNTEYKGGKITLIYPSIEV
KTRKIYAEVETQNLTPGLFGEGRIITRD"
gene 22165..25182
      /gene="cmeF"
CDS   22165..25182
      /locus_tag="DMACINML_01645"
      /gene="cmeF"
      /locus_tag="DMACINML_01645"
      /inference="ab initio prediction:Prodigal:2.6"
      /inference="similar to AA sequence:RefSeq:CAL35151.1"
      /codon_start=1
      /transl_table=11
      /product="integral membrane component of efflux system
(multidrug efflux system CmeDEF)"
/protein_id="Prokka:DMACINML_01645"
/translation="MFKLAINRPVTMLMFFLALMLFGMISALSMSVNLFPNVSIPLIK
ITSKVNGDLKFVESKITKEIENTLSEIDGVKTITSATYDNFSVSVVEFKLGKDEVA
NDVRDKIGTLSLPTKPEIEKISSDSGSAISL FVYSKDKLNL MREINDKIKPFLQRIDG
VGKIEAKGFLEPQIRIELKPNLEKYNLNALEIANI IKNQNFKQALGELNNNQNNYII
KGYFEATNLEELANLRIKTGVFLSDIANISNLYEDEKQSAIYKNQEGVLLLELGKITNF
NTLKM IQNVKNALPNLEKQISNDISIEVLYDKSLNIHKHLSQVIFDMVLGIFLTLVIV
FLFLRNL SATLIAIAIPTSII STFFIIDLLGYDLNRLTFIAL TLSIGIFIDDAIIVI
ENIAKCLKTYPPLQA AFLGISEIGFSVLSISIVLLCVFIPISYMNSIPGLFFNALGIS
VAGGIVISFLVSVFLIPSL SARFLNPKESKFYEKTEAFFEKMEQKYENLLYKILKNKA
KFILATLIFVALSFALATRIGLDFLPMEDDSEIQV LLESKKDL SLEAMKEKSLHLLLEK
IQMEENIAYAFLL LAYDDAKDSTKAKIYIKL KGLEERKLRQNAIVNLYRQKFQDEDLK
IKILELPKIEGAGIDDPVQFLVLGEDLKS LKEAASRAKEILASNTRIVDINDNADMIK
SEVALHINREKAKLLDVDPEYIAGILGYSFAQLSIGSMDRGNSKDDIILSFAPQFKKD
IEALKRISIKNNKGLNLDLASVIDFTYSEDLKTINRYNKNRSVKITAGVNDLSLGAVQ
TLLLDNIDTILGENTNLNYTFSGFINLLDET VQGFIVAVILAFVLIYLVLAALYESFI
LPLIIMITMPLAFGGTSIGLFI SGHNFSLFVLI AII LLFGMVGKNAILLV DVANKKCH
EGLDPDEALLIAGKSRLRAILMTTFAMIFAM LPLALSRGAGYEANSPMAIAVIFGLIS
STLLTLLVVPALFKFCFKLDTRLRKIYEREKIN"
gene  complement(25203..26009)
CDS   /locus_tag="DMACINML_01646"
      complement(25203..26009)
      /locus_tag="DMACINML_01646"
      /inference="ab initio prediction:Prodigal:2.6"
      /inference="similar to AA sequence:RefSeq:CAL35152.1"
      /codon_start=1
      /transl_table=11
      /product="putative DnaJ-like protein"
/protein_id="Prokka:DMACINML_01646"
/translation="MQIVQTLETINVNTDDINVFQYFKDLITKNFTKVVGRKNKIFSF
FEENEIPQRRYFLKVL DQYRKSSNESIENLKDAHFKTFRLNFEQNNVLKPMLFIKVD
FAGDKILMKLSSNEKLFV TYMKNYFKEHCIEYNEMTRILILDYKNESTFEFF EAFAD
SEHLKYCVNFEVDRQEYKNFRQNIHNKENMKWKFNALAKLFSNYFNTLECTPQNDLSE
IRHKYLIMVKLYHPDFYQGKSAIEQAYAREQFEKIQIAYDNLKALYKNNT"
gene  complement(26011..26730)

```

```

/ gene="ate"
/ locus_tag="DMACINML_01647"
CDS complement(26011..26730)
/ gene="ate"
/ locus_tag="DMACINML_01647"
/ EC_number="2.3.2.8"
/ inference="ab initio prediction:Prodigal:2.6"
/ inference="similar to AA sequence:RefSeq:CAL35153.1"
/ codon_start=1
/ transl_table=11
/ product="putative arginyl-tRNA-protein transferase"
/ protein_id="Prokka:DMACINML_01647"
/ translation="MLEIGFCTLEDECPYLKDRRSRIEYKYIENCSKEINSKLIRRGW
RRFGRYFSRPICKDCKECLSLRILADEYKFSRSERRVINKNANTKIILRKPLLSNEHL
FLYDKYHRFMEEKRTWKRYDLNFRQYYNLYIDGFMNFGYELAFYVEDKLCVLDLIDRL
EDGISSIYCFYDPEFSHLSLGKFSLLNEIEIAKKEKLYIYLGYFVKKCQSLSYKADY
TPNEILKGTRELFENEILWER"
gene complement(26730..26966)
CDS / locus_tag="DMACINML_01648"
complement(26730..26966)
/ locus_tag="DMACINML_01648"
/ inference="ab initio prediction:Prodigal:2.6"
/ inference="similar to AA sequence:RefSeq:CAL35154.1"
/ note="conserved hypothetical protein Cj1036c"
/ codon_start=1
/ transl_table=11
/ product="hypothetical protein"
/ protein_id="Prokka:DMACINML_01648"
/ translation="MDFDLSKSIKKEMQTHSKEQKSPKNSNKKDMSHFNKEIKTQPQ
EMSLDKEMQEVFLKQEKLQDEFLEFIKNADIKKI"
gene complement(26966..28408)
CDS / locus_tag="DMACINML_01649"
complement(26966..28408)
/ locus_tag="DMACINML_01649"
/ inference="ab initio prediction:Prodigal:2.6"
/ inference="similar to AA sequence:RefSeq:ADT66341.1"
/ codon_start=1
/ transl_table=11
/ product="acetyl-CoA carboxylase, biotin carboxylase"
/ protein_id="Prokka:DMACINML_01649"
/ translation="MVQIHKILIANRAEIAVRVIRACRDLHIKSVAVFTEPDRECLHV
KIADEAYRIGTDAIRGYLDVGRIIEIAKACGADAIHPGYGFLSENYDFAKACEEAGII
FIGPKSEVIHKMGNKNIARKLMAQNGIPIVPGTEKLNITYSMDEIKVFAEKIGYPVILK
ASGGGGGRGIRVVKHEELENAFDCKREALTYFNNDEVFMEKYVVNPRHIEFQILGD
NYGNIIHLCERDCSIQRRHQVIEIAPCPGISDNLKRTMGVTAVAAAKAVGYTNAGTI
EFLDDYNRFYFMENTRIQQVEHPVTEEITGVDLIVRQIRIAGGEILDLEQSDIKPRG
FAIEARITAENVWKNFIPSPGKIGEYYPALGPSVRVDSHIYKDYTPPPYDSMLAKLI
IKATSYDLAVNKLERALKEFIIDIRTTIPFLIAITKTREFRRGYFDTSFIETHMQELL
ENTEDRHQDNKEEVIAAIAATLKKIRESRE"
gene 28544..29707
/ locus_tag="DMACINML_01650"
CDS 28544..29707
/ locus_tag="DMACINML_01650"
/ inference="ab initio prediction:Prodigal:2.6"

```

```

/inference="similar to AA sequence:RefSeq:CAL35156.1"
/codon_start=1
/transl_table=11
/product="putative cell division/peptidoglycan
biosynthesis protein"
/protein_id="Prokka:DMACINML_01650"
/translation="MIADKCLFYLSCLISIGIVFSYSLTVFTVLFDDYSEFHFFIRQ
LFFGLSGILIMFFISRLDPDKILAKRIILAILIGSFICIIILPFLPSALATASGGAKR
WIRLGPLSISPVEFFKIGLIYFLAWSYTRRIDDSKKAIKEVLIILPYCILASIVIGY
IYITQNDLGQSVISFFLILALAFFAGASKRLFAFGILIIIMMIGIMVIFSNQRRIQRIA
SWWGNIQDAFLPMLPDWMADALRVSGNSEPYQISHSLNAIAHGGMFGEGGLGLGTFKLG
FLSEVHTDFVLSGITEEIGLFGLVICFIYLMILRIFRIAGRCEEKQDFIFCSGIAL
LLFSFFMNAFGIISLTPKGVAVPLLSYGGSSMWAICIGIGYVLMISKVKL"
gene 29704..30720
/gene="murG"
CDS /locus_tag="DMACINML_01651"
29704..30720
/gene="murG"
/locus_tag="DMACINML_01651"
/inference="ab initio prediction:Prodigal:2.6"
/inference="similar to AA sequence:RefSeq:CAL35157.1"
/codon_start=1
/transl_table=11
/product="putative
undecaprenyldiphospho-muramoylpentapeptide
b-N-acetylglucosaminyltransferase"
/protein_id="Prokka:DMACINML_01651"
/translation="MTIVLTGGGTGGHLAIVRCLLESIAIKKNIDCVYIGSQNGQDRAW
FENETRFKAKFFLSSRGVVNQSKLKGKINSLHTFKLSKECKQIFKDYDIKAIKIFSVGGY
SAAPASFAALFSHLPLFIHEQNSKSGSLNKLKPFKQFYSAFEKEIVPYPVADKFFD
KARIRKELKNIIFLGGSQGAKFINDLALNLAPELQKKGIGIIHQCGKNELEKYQQAYK
DLNIQADVDFDFPHLEEKMNADLAISRAGASTLFELCANTLPSIFIPYPHAAKNHQY
FNAKFLQDKALCQIFMQNNTYSDEILKAILKLNLEDISTRKDMAQKNGADILLEKAL
ETMK"
gene complement(30710..31873)
/locus_tag="DMACINML_01652"
CDS complement(30710..31873)
/locus_tag="DMACINML_01652"
/inference="ab initio prediction:Prodigal:2.6"
/inference="similar to AA sequence:RefSeq:AJK71184.1"
/codon_start=1
/transl_table=11
/product="MFS transporter"
/protein_id="Prokka:DMACINML_01652"
/translation="MLSFKKIFWLNVAIVIIIVAFNLRAPITAIGPMIDIIQDEYNLNS
TLAGVLTSLPLIAFGSISFIVGYFSPIRAIIVGIFLIFIAELIRSYLGVYGLFLGMLG
IGCGIAIANVLLPSFIKEKFPKMMASMMGIYSLVLSISSIAGIALSMPLLNIFDLAGA
MVFWSVFSFIALMIYYPQAKNGRFFRTKKKESKINLLKNPTTWKITLFMGFQSFLAY
SLFFWYVQIIVEKGYDKDFATDMVLFSQLVAAPVSLFGPLLLGKLLKSLHTPYIAILC
AMYAVSFGIILAFDTRFMIIILAAFIVGFPWGGVFGIALLFIAQKSSNAKIAARLSAFA
QFGYLIQAQGWIIIGIFHDMFGNFTSSICILFIVGILVNIIFGYLAYKSKVIS"
gene complement(31881..32735)
/locus_tag="DMACINML_01653"
CDS complement(31881..32735)

```



```

/locus_tag="DMACINML_01653"
/inference="ab initio prediction:Prodigal:2.6"
/inference="similar to AA sequence:RefSeq:AJK71185.1"
/codon_start=1
/transl_table=11
/product="ATP-binding protein"
/protein_id="Prokka:DMACINML_01653"
/translation="MKKYVLSLALVGASLLGASELKYQEFDFGFKSPESIFVDKNSVYV
SNVGEKLEPLAKDNDGFISKLDKNGKVL EHKFISNLNAPKGMMEVANTLYVVDIDVVR
GFDLKSKEVFNLPKGAIFLNAIEKLNDDTLLVSDTGTGLVLKVDLKAKKYDELKLL
DIAKFGGPNGLYLDRKNDKLFIAGYHPDGASGGVMSYDLKDKELSVIKNEKEAYDGI
VPYENALLVSSWGENLNGVIYRLEDDKVLKLDLPSIKGPADIFIEGDTLWIPKMVEGK
ILKVELKN"
gene complement(32798..33688)
CDS /locus_tag="DMACINML_01654"
complement(32798..33688)
/locus_tag="DMACINML_01654"
/inference="ab initio prediction:Prodigal:2.6"
/inference="similar to AA sequence:RefSeq:AJK71907.1"
/codon_start=1
/transl_table=11
/product="AraC family transcriptional regulator"
/protein_id="Prokka:DMACINML_01654"
/translation="MEQILSLPQDLKQLKGVVDYKNFKSCTFAKYTQVSASHSSFVNVG
SHLLTFVRKGYKILHTASKDYKIDSYETLFLKAGNYTLSNVGLSSGVYEAYLFFFDNA
FLIELIYKYKELFKLEQASRESEIFWVKNDKILQGILESFTPHFDENTQILDPIVSLK
FEEIFLHLLLNKNTYFIGFLAGILKEFRLDLSQLFEYCGREFVSVSEMAADFALDFAT
FSREFKCKFGQSPKKWLDEKRLQKAKVLLFEFSKKNVNEIANECAFSVAVFIERFKEK
YNQTPKQYQKSKNLYFLSKN"
gene complement(33703..34308)
CDS /locus_tag="DMACINML_01655"
complement(33703..34308)
/locus_tag="DMACINML_01655"
/inference="ab initio prediction:Prodigal:2.6"
/inference="similar to AA sequence:RefSeq:AJK71186.1"
/codon_start=1
/transl_table=11
/product="thiamine-phosphate pyrophosphorylase"
/protein_id="Prokka:DMACINML_01655"
/translation="MWDKKIIAISDRKCEIDFLKQVEKLAKSGIDAFVLREKDLSEF
EYYDLAKEVLAICAKHKTTCFLHFFDKECLKLGHRYFHAPLALLRQEPKMSKYFHIIG
TSVHSKEELLEAMNYGVNYAFVGHIFESSCKKDLEPRGLEFLNSLLSFSQIPLYAIGG
INVQNIASFKDINVAGVCMREVL MREKDVKKYLVECKRNLL"
gene complement(34298..35443)
/locus_tag="DMACINML_01656"
/locus_tag="DMACINML_01656"
/locus_tag="DMACINML_01656"
/inference="ab initio prediction:Prodigal:2.6"
/inference="similar to AA sequence:RefSeq:CAL35162.1"
/codon_start=1
/transl_table=11
/product="thiazole biosynthesis protein ThiH"

```

```

/protein_id="Prokka:DMACINML_01656"
/translation="MQDYMQYLPQMQLKSDILSKVLDEIQNYDETKYSAKEVQEALN
ATHLSIENLKALLSSAAEDFIEELAFKSAKTKQKYFGNSISLFTPLYLSNYCNSKCVY
CGFQKGNKIARAKLSEDEIHEEMQAIKTLGLQEILMLTGEGRFASVEYIAKACKIAR
QYFKVVGVEIYPMNEDEYKILHENGCDYVTFIQETYNPLKYSKIHLGGEKRIFPYRFN
GQERALRAGMRGVAFAALLGIDDFRKDALATALHAYFLQKAYPHAESISVPRLRPII
NNAKIHPKDVSEKRLQLVLCAYRLF LFPAGITISSRERVGFREDEVKLGATKMSAGVS
VGIGEHLKGDKKGDGQFEISDDRGVDEILAMLKNSNLQAVMSDSIYVG"
gene complement(35446..36222)
/locus_tag="DMACINML_01657"
CDS complement(35446..36222)
/locus_tag="DMACINML_01657"
/EC_number="2.8.1.10"
/inference="ab initio prediction:Prodigal:2.6"
/inference="similar to AA sequence:RefSeq:CKG89409.1"
/codon_start=1
/transl_table=11
/product="Thiazole biosynthesis protein ThiG"
/protein_id="Prokka:DMACINML_01657"
/translation="MQENLKNDSLKIGKYEFKSRFILGSGKYSLELIKSAIEEAKAEI
ITLALRRANTGEIANILDYIPKNITLLPNTSGARNADEALRIARLSRELGCCELKIE
VIGDSKYLLPDNYETIKACELLAKEGFTPLPYMHADLYAARAMRDAGAAAIMPLAAPI
GSNKGLCAKEFIQILLNEIDLPIIVDAGIGTPAQACEAMQMGVSAVMANTAIAEAKDI
ALMAKAFSLAIQAGRAGYLAGLASVSEAKASSPLTGFLRD"
gene complement(36226..37026)
/locus_tag="DMACINML_01658"
CDS complement(36226..37026)
/locus_tag="DMACINML_01658"
/inference="ab initio prediction:Prodigal:2.6"
/inference="similar to AA sequence:RefSeq:AJK71189.1"
/codon_start=1
/transl_table=11
/product="thiamine biosynthesis protein ThiF"
/protein_id="Prokka:DMACINML_01658"
/translation="MRIKFNGKELDTEFSTSLDFFKSVSKNENDVWIINGFATKENIK
IHENDELFCIERNTLPPKDALDAMMRARHTPKLHDKLKNRVAVCGLGGLGSHIAINL
ARSGVGYLKLIDFDVVEPSNLNRQAYRVSDLGKFKTEALKEQISEINPYIKTEICTLK
IDEENLPDLFKDMDIVCEAFDGDALAKAMIAQNFHRFYKDTTLICASGLAGYGDSNSIQ
TRKIAKNFYVCGDLVNGAKVGNGLMAPRVNICAGHQSNLVLELLANKE"
gene complement(37026..37217)
/locus_tag="DMACINML_01659"
CDS complement(37026..37217)
/locus_tag="DMACINML_01659"
/inference="ab initio prediction:Prodigal:2.6"
/inference="similar to AA sequence:RefSeq:CAL35165.1"
/codon_start=1
/transl_table=11
/product="putative thiamine biosynthesis protein"
/protein_id="Prokka:DMACINML_01659"
/translation="MIINGEKFELKELKFMDFIKEKGFKIELIALELNGEIIPKSEFE

```

gene NLILKENDKAEIVSFVGGG"  
 complement(37388..38140)  
 /locus\_tag="DMACINML\_01660"  
 CDS complement(37388..38140)  
 /locus\_tag="DMACINML\_01660"  
 /inference="ab initio prediction:Prodigal:2.6"  
 /codon\_start=1  
 /transl\_table=11  
 /product="hypothetical protein"  
 /protein\_id="Prokka:DMACINML\_01660"  
 /translation="MSFSLQDIEYERIKTLFSNFPNLLNKDFEIRMKKAFGVLHFDYL  
 WGACKEAEKILAKYKQDNLFDLIMQIYTKKRKTHQANFLLLHCFENALRSTLCVKIAN  
 LYNVNSDSWFLNQNPNSYGLSNILRFLNKRKNHLKGGNAQNSWEAFDCFYLDLEDI  
 ISTHWSEFAPIFKNEKSYKQDLPSYGTKEHLLIKLSQIRKARNEIFHNKPTKIKFRK  
 ELEILLRLDYNLEDVIKIGEISSAIQLKYHY"  
 gene complement(38419..39516)  
 /locus\_tag="DMACINML\_01661"  
 CDS complement(38419..39516)  
 /locus\_tag="DMACINML\_01661"  
 /inference="ab initio prediction:Prodigal:2.6"  
 /inference="similar to AA sequence:RefSeq:AJK71192.1"  
 /codon\_start=1  
 /transl\_table=11  
 /product="succinyl-diaminopimelate desuccinylase"  
 /protein\_id="Prokka:DMACINML\_01661"  
 /translation="MNAKELLIELLKFEITPEDDGalNFIALELSDFEaffIEKEGI  
 KNLTKKFNDEGEHLAFGGHVDVVPAGEGWKNDPFEEEGFIYARGAQDMKSGVA  
 AFIDAVKEVNFKGGRLSLILTSDEEGEAKYGTKAVLEWMKEKNMLPDYAVVAEPTCVK  
 KMGDSIKIGRRGSINGKLLIRGKQGHAAYPEKCINPVHDFAPVLKLLAGFDLDPGSAE  
 FSPKIVITDIRGGMQVSNVTPNDLRLMFNVRNSPDTNLEDVRAYVEKICHGLNYELE  
 LTQSSEPFLTSIDNKIVQKMNESVQKITHEVPELNTKGGTSDARYFAKYGVKVVFEFGV  
 CNDRIHAIDERSVEEFKLCVFRDLVENF"  
 gene complement(39521..40123)  
 /locus\_tag="DMACINML\_01662"  
 CDS complement(39521..40123)  
 /locus\_tag="DMACINML\_01662"  
 /inference="ab initio prediction:Prodigal:2.6"  
 /inference="similar to AA sequence:RefSeq:ADN91223.1"  
 /codon\_start=1  
 /transl\_table=11  
 /product="Transporter, LysE family"  
 /protein\_id="Prokka:DMACINML\_01662"  
 /translation="MFDSFLNGLFLGFGVSVFPGPINILILTYALKAFKNSIAVGLGA  
 FVDLLYLLLQFGLNFDNVI FMRALAI FGFCFLSYMAYLMLKKKNE DLHLDQHKD  
 FKESLLKSYVKGIILNGSNPYVIGFWLSATGIVLSNQHAYSTILGLVVAILFWIAALA  
 FVAKYSYLFSAKVIRIINIVSALIIEYFALNLLYKTFIG"  
 gene complement(40116..40817)  
 /gene="npdA"  
 /locus\_tag="DMACINML\_01663"  
 CDS complement(40116..40817)  
 /gene="npdA"  
 /locus\_tag="DMACINML\_01663"  
 /EC\_number="3.5.1.-"  
 /inference="ab initio prediction:Prodigal:2.6"

```

/inference="similar to AA sequence:RefSeq:CAL35168.1"
/codon_start=1
/transl_table=11
/product="NAD-dependent deacetylase"
/protein_id="Prokka:DMACINML_01663"
/translation="MKNIMILSGAGLSAPSGLKTRDNDGLWEEYDVMEVCSATGFRK
NPKKVLDFYDARRVQLQSVKPNYAHEKIAQLKEKWGKNLFILTONVDDLLERAGCKDV
VHLHGFLPELRLSCDEIFNIGYEKIADKQCPKCKSQNLRHNIVMFEEQAPAYATLYS
LLHQTSLFISIGTSGAVLPVGQYASMCEKSILNIYEKDVNLERYFDKIYTEDIIISAID
KIALDIENFMKDGNV"
gene complement(40855..43062)
/gene="mutS"
/locus_tag="DMACINML_01664"
CDS complement(40855..43062)
/gene="mutS"
/locus_tag="DMACINML_01664"
/inference="ab initio prediction:Prodigal:2.6"
/inference="similar to AA sequence:RefSeq:CAL35170.1"
/codon_start=1
/transl_table=11
/product="putative mismatch repair protein"
/protein_id="Prokka:DMACINML_01664"
/translation="MNEIKEELLKLDLNTYLHEFKSCFARDKEIFLQGDShLHFkRI
NELCEAEFPNLPeLSNLDKALVHLSKQGVHLDEIFEFVKIFRYFEKIKKLNlGSNLN
SWLEKIEFVNGILNLCEKFDEKGeLkESLDERLININTALRLKNEAVIAEFKkCYTK
SLMPYLIDTQVHLINSLEALLVRGGFNHAIKAKIIIGRSSGGGFYIVPLSVENLQNDIE
KIKNQKEGIYYEYAKNFSTFLAKNLAFkFINNAFDLFDHYSARVLLAKRKDYEFVLC
DNSNKIILKDFAHpALKNPKSVSLDFSKQVLIITGVNAGGKSMLLkSLLSAAFLAKHL
LPMQIKSSQSKIGSFKEFDaiIEDPQNVKNDISTFAGRMLHFskLFSKkSLLLgIDEI
ELGTDfEEAAcLYSVLISRLIDSGLKIIITTHKRLAMLlAKNDQVELIAALYDEELS
RPKYEFkLkGTIGkSYAFETALRYQIPSNLVSEAKkLYGEDKENLEELVGKNINLELEL
KAKLESVEKKEQKVDEILLSLKDQKEKNEQEFrdNLRNLEfkFHKAIEEAKkTIHLKD
TKEKQRSLNKANELKKEIILPSMEQNEELRVGDFVkyEKIKGKIVAIKNDAMVESDG
IKLRVPLKLLKSGAIQQkVAKTISVTKPSNLSVSLDLHGLRSDEAIARLDkFISDA
LIAGFDEVLiYHGIGTGKLAFAVREFLkTHKSVKSFQDAPINQGGFGAKVVRL"
gene complement(43055..43405)
/locus_tag="DMACINML_01665"
CDS complement(43055..43405)
/locus_tag="DMACINML_01665"
/inference="ab initio prediction:Prodigal:2.6"
/inference="similar to AA sequence:RefSeq:CAL35171.1"
/codon_start=1
/transl_table=11
/product="putative integral membrane protein"
/protein_id="Prokka:DMACINML_01665"
/translation="MSKVLLYVLIILILALIAFSLRKKLGKHAkTLFGVLLVVFIFLA
VLFEVNSQKShLRNDIIVAFNQNkNILCKDINISKAYFNyEFGTGSFISKDNNQSFN
SLIIdIRDCRLNDE"
gene complement(43398..44693)
/gene="murC"
/locus_tag="DMACINML_01666"
CDS complement(43398..44693)
/gene="murC"
/locus_tag="DMACINML_01666"

```

```

/EC_number="6.3.2.8"
/inference="ab initio prediction:Prodigal:2.6"
/inference="similar to AA sequence:RefSeq:CAL35172.1"
/codon_start=1
/transl_table=11
/product="UDP-N-acetylmuramate--alanine ligase"
/protein_id="Prokka:DMACINML_01666"
/translation="MQNIHFIFIGIGIGISALARFLKEKGFNISGSDLKESKITKELEK
EGVEVKIPHHKDNILGKDLVIYSAAIKEENPEFKYAKELNIKCLSRKEALPLILEDKC
VFAVAGAHGKSTTSSILASLINDASVIIIGAILKEFGSNMIYKESKNLIFEADESDSSF
LNSNPFLAIVTNAEAEHLHDHYGNEVCRLHKAYDDFLDLAKIRVINAEDEYLGKYGQEA
IKLYPSKDIKNVTMHIENFKPFTSFELKNFGRFSVFGMGEHIAIDAALAILAALNYEN
IENIRKNLKKYQGIKKRFDILHADENLALIDDYGHHPTEIKATLKAAKEYAKLAGYKK
IVAI FEPHRYRLAANLNEFAKAFEGVDELVILPVYSAGEEKIELDLKAVFPKALFIE
DIKREGKFLVASKGQVFDEGLIIGFGAGDISNKL RQNE"
gene complement(44875..45519)
/locus_tag="DMACINML_01667"
CDS complement(44875..45519)
/locus_tag="DMACINML_01667"
/inference="ab initio prediction:Prodigal:2.6"
/codon_start=1
/transl_table=11
/product="hypothetical protein"
/protein_id="Prokka:DMACINML_01667"
/translation="MSQANNTEIKEQDTQDEIIWEGKKDIPSFLLYWIANIVFLCFI
LYLFPRLFNPKEIDYKWFIVFVIFLFLGLYILVKNIYQMANIKRIYITKEKLVIEYYI
KNDLVFPLGTFIYRSSLPSISNPGDIVIYTFGDKVKEYLEPLFSDGDDPTKGC
KRINAIKPHVMPYLLSLSDDEEFKIISHVSGYNEIGTTF LKEAMELRKEKKDE"
gene complement(45500..46129)
/locus_tag="DMACINML_01668"
CDS complement(45500..46129)
/locus_tag="DMACINML_01668"
/inference="ab initio prediction:Prodigal:2.6"
/codon_start=1
/transl_table=11
/product="hypothetical protein"
/protein_id="Prokka:DMACINML_01668"
/translation="MNNSTLPWKS KRKFYFLAILQYIIYLALGLFVCWFCWFVLLKES
LWYGFFAFGLSYYV FELHRALNFKSIILTEQGLILKMRWFDTEIFYPYGSFTMSYDIA
YGIRFFERIEIQNIKHIRKEFIFPCGVDSFGSFENNHTFKELCTKYTQKALETMNL EE
KVNLYKLYRANIKIFFNQEIDHNVFIIDFSPYIQEIKTYLRDKNEPSKQ"
gene complement(46133..46285)
/locus_tag="DMACINML_01669"
CDS complement(46133..46285)
/locus_tag="DMACINML_01669"
/inference="ab initio prediction:Prodigal:2.6"
/codon_start=1
/transl_table=11
/product="hypothetical protein"
/protein_id="Prokka:DMACINML_01669"
/translation="MNENIYGSLEFYSKETQSTPSDKRDLGVFGDVAPYALGITEGFA
TKAFKG"
gene complement(46278..46916)
/locus_tag="DMACINML_01670"

```

CDS complement(46278..46916)  
 /locus\_tag="DMACINML\_01670"  
 /inference="ab initio prediction:Prodigal:2.6"  
 /codon\_start=1  
 /transl\_table=11  
 /product="hypothetical protein"  
 /protein\_id="Prokka:DMACINML\_01670"  
 /translation="MSEINNTEIKEQDTQDEIIWEGKKHIPSFLFWITYIVLLCLF  
 LYLPRLFNPSKEIDYKWFIVFFTFLLGIYAFARAIYKMANIKRIYITKEKLVIEYYI  
 KNDLVFPLGTFIYRQISYSPSPGHIVIHTFGDKAKEYLEPGLFSDGDDPTKGCCEK  
 INAIKPHVMPYLLSLSDEEFKIFFHVNATSEIDTTFLEAMELRKEKKDE"

gene complement(46926..47522)  
 /gene="tssI1\_1"  
 /locus\_tag="DMACINML\_01671"

CDS complement(46926..47522)  
 /gene="tssI1\_1"  
 /locus\_tag="DMACINML\_01671"  
 /inference="ab initio prediction:Prodigal:2.6"  
 /inference="similar to AA sequence:RefSeq:A0H52008.1"  
 /codon\_start=1  
 /transl\_table=11  
 /product="type VI secretion system, secreted protein"  
 /protein\_id="Prokka:DMACINML\_01671"  
 /translation="MLLASDREKLNLANEKYPFYRLGGIRISAFEKLVGLSNTLNVGV  
 DNKVRIAKNSHEFVGENKDIEIGANQNTIIHKDEIRNVKGENKLLIEKSLTQTIEKEF  
 FLNVHQNSAHIQDNTSLKSNSMQTKIEEQYSLESENSTFDFQDCGVKAGNQILHQV  
 GDTQIVTKKDCVIIKAGGVEVIIDSNGLVVKGGVEKAE"

ORIGIN

```

1 atttttttat caaagatata aattccacca taattacttg caagagtttc tatttcactt
61 gctttttttt ctttaaaagc acatgcactt aaaaatacta aagaaaataa gcttagaatt
121 atcattgtga ttttcattta ataatccttt gtttaaaata agcatattat aaaataatth
181 ttatgtgaat tgattttaag acataagggc aaatttaaaa aattaatccg gttttatth
241 tcttctttaa tcttctttt tgccaagccc atctgctcat aggcacgat ttctttttta
301 taagaagcag aaatthttt aagctcttga tttaaaagc ttatagtttg agggctagct
361 ttagggtag cagctagggc agatacaaac tctaatttat ttttcgttt tcatctagc
421 tctttagaag ttttagaacc tagtttatgc gtttgaaca agagctttgc tagctcctt
481 aatcactat cgctatatt taaatcacta gctgctacta tcatcttatt taaatcgcta
541 tcaatthtac gggcttgaac tgtatthtca gtgthttttt gthttatatt tctctthta
601 tcatcgctga taatcaaata agctatcaa ccaaaaaaa ggagcaaagc tccagaggtg
661 caaataatca ccaaaatat ataactcatt aaagcttgc tacaaactca cgctthctt
721 ttgcaagcaa tgctaaaacg atcataatcg caattccca ataaacataa ctaggaatth
781 gagcagctt cctgctgcg taagaatgca aacctacta gaaataatth acccaaat
841 aagtcagat aacaaccaa taagcaaaca tgctccatag tgcaaatgta aattgattg
901 agtthtttg aatcattcta atatgcaaaa tagccgata aaccaaataa cttaccaag
961 ccaagtht ctttgatcc caactccaat atctaccca actctcattg gcccaattg
1021 cacctaagaa atthccaaca gtaagtaagc aaagcccaa aatcatcgac atthcattg
1081 tacgagttgc ctcttgata thtcttaaaa tactthgatt gtattgattg thtctthta
1141 aaaaacacat caatathaa gtaaaaattc ctagcaaaga acaaagccc aaaaatccat
1201 agctagcag aataacagac acatggatac taagccaata cgaattaagc actggcataa
1261 gatttgtaat ttgtggattc atctcactta agtgagccac agctaaaaca ataccgcaa
1321 gtatagaagt taaggataaa gcaatcgac thtttcgaga aaagaaatt cctgaaagag
1381 ataaagcca agctatataa accatgctt catatccatt actccaaggg gcatgatctg
1441 ctaaataagc acgtaatca agtcctatg tatggatgat aaaggctaaa atathtaaaa
1501 tataaataat thtaaatata agagaaatth taagctthg tgcaaccatt thaaacaaa

```

1561 gaacgatcaa taataaaaat cccgcgatca aataaacagg agcaagcttg acaaaaatth  
1621 cagccttatt tgaaaaaatc tccatctcta ctttcgtttt attaggcata acctcatgcc  
1681 ctatthttctc ttgatattgc ttgataagcc ctaaagattc attagctctt gtccaatthc  
1741 catcatgaaa agctgtatct acggaagaaa aatagthttt tataagtgct aaaacaaact  
1801 gaccctcttc gcccttaagt gttgtaatag cagaaaaagg agctaaccat gcattattgt  
1861 catgattthg tataggaata aatthaaaaa gttctccact aaaaactaaa thttacaacat  
1921 ttgctctthc gtctagatta atgattthctt tatcaaatac gcctctagca thttggattth  
1981 tgcgattagc atthttccaca taththttgaa gthttatagcg attattagca tcaaagaaat  
2041 ccttatattht gacataththt aattctggag aaaththctaa aaththcagcg atggcttcac  
2101 gaacaththt attgctthggc atthaagataa aagcttcatt thgccataaa thccacattaa  
2161 taagcattga aagcattata gcactthgctt cthgtccctt atagthccgca thctthatgaa  
2221 ththththcaa aaththctcta gctaaagtat caaaaggtht cattctacca thctacagatt  
2281 ththgacgat aagggctthg agctctthta catgthgtht atctactata ggcaththth  
2341 gctctaagth tataththaa thctthgacaa gcaththtct thgctccaaat aaagctacaa  
2401 ataaaactaa agcactagca gtatgcttht gagcgtctth attgataagt cthgctagag  
2461 thctaaatct tgaatgtggg ththaagaaat thaaaaacat acccaaacia agthaagaaat  
2521 aacctatgta tthtaggaatt thacctgggt ththattgac cgataatath gtccctthth  
2581 catctgathc gthaagaactt thgataaaatc tataaccctt ataathctaaa acathattca  
2641 thgaaatcct ataathcaaaa thathctthcat thgththtaac thgathththc cthgcataag  
2701 aagcaggaga catagathca ggataacgat thaaaaacia atctctthaa thaaaththcaa  
2761 aagthaatth ctathathgca agcgcctthg agathaaagaa thththgtcca gcaagthctta  
2821 thacagthagg ththattgtht thcaathathc aaaththctth actthctthc ththathctta  
2881 gthgaaagtht thagcgcathc gthctththt aththcaaagc thgathaatct thactathag  
2941 caathcttht aaaththgta agccaagaag thththcaatt thgtgththct thcaaaactthg  
3001 athathctthc agthctthgca aaththcaacc aagctgatht aaathctagc caaaacttht  
3061 catctthagg cthaththaa cththgathth cththgathth atgcaaaagag gcaathththca  
3121 thacaaaath thaaathathc aaathathca atcthaagath ththtagathh gctthctthcg  
3181 cgathththag agththgathh thcacctthth thathathgaa aathththaa thththctcg  
3241 aaththathth thaaaththth thctaththth thathaggtth agctathathc thathctathaa  
3301 aggcaaaath aaththctthg athaththgth cthctctthg thctaaaththc aathththgac  
3361 cthgagaath ththththgaa acagthcaaaa caagcaaaagg cgaagaaata thgtctthct  
3421 thgthaaacata athctgcathc aaaththaaat thththathth thagathagct ththctathc  
3481 cthathththaa aththathth aaggaaththg caaaaggthaa aththctata thagathathc  
3541 thacagaagth athacgctthc cthathththaa thgthgthaaat thththaaagag gthththagaac  
3601 ththcaactaa ggcathththg gtathgctthc gaathcgtthg thagctththc aaathctthc  
3661 aagathathc agcagathca agthagataa aaagaaaaga aaathgaaaa athathcaag  
3721 gthathththt thaaagcaaac athththaaac gaagathgthc aaathathaa ththathctca  
3781 ataaaagctg thathathctaa aaththaaac thathathathc aththgthcag gaththgthg  
3841 thgcaataagc actctthata aaagthgthca aathctagga thagggcaaaa agcaaaaata  
3901 aaathathgaa aathththaa thcacctthac thththgathaa athththctata ththcaactc  
3961 thathaththaa thcthaathat thththctthaa thathgthath gcctathgagth thththagct  
4021 cacctthgath thgcaathagth cthathththc aaathathagc athathathctt athththaacg  
4081 cagaththagc gthththgthct aththaaagth thagthathct thctthcttht aaathgathct  
4141 thgaththcaa aathctththc athathctthg gathgathgthc aagcagggthc thathcaagca  
4201 ththaaagctt aggthctthc athcaagctc thgaaathagc aagathththg gctthctthc  
4261 cgctthaaath cccgctthata gathgththth thaththgcaag thththgthaaat aaththataca  
4321 ththgctthctg caathgththc thathththcath thathththgth agcgcctthath ththaaathth  
4381 cththcaact aagaththata aaathgctthc thctthcaggg caththaaagct athaththth  
4441 gcaththaaagth athgaththgaa thgctththth thgthathaac thththctthgct cthththgagc  
4501 thgctthththc thgctththaa agcgcaththg gathgathagth cththctthgct cthththgagc  
4561 caathagaga aathathathg cccgththctaa cththaaathc thathctthth actgctthcaa  
4621 ththaaactha athaaathgthc aaathththth thathathgath caaaathctc caathagca  
4681 gcaathathctt cththathgath thacathgathc cththththct cththcaaaath agthththacca  
4741 thathcaagca cthaaacttht athcaaaagth thgththaaath aththathathc athgctthata

4801 agtaaaacac tgatthttata gtctthtttcta agctthtttaaaa taagthtttctgc caatthttcatca  
4861 cthttcgctag aatthttcatacc cgcagcaggc tcatcaagca agaggagthttt tggatthttgta  
4921 gccatagctc ttgcaatthttc aacctthtttctt tgctgacctat aactcaaaact tghtagctthttc  
4981 tcatctgcaa atthttcactaat acctagthttcc tctaaaagct tataggctthtt atthttttaaat  
5041 tcttgctcaa ccctatgaaa acgtcctaaa tgcaaaaaaag cthttctaagac actatathttc  
5101 atthttgcttat caaaacctat cattacatthttc tcaagcacac tcatactcga aaataatthttc  
5161 atathtttgaa aggtthttccttgct tatgcctaaa tgtacaatthtt tgtgaggtthtt taaatcattg  
5221 atthtttcttat cthttgaaaaaa tacctctcca cthttgthttggtt tataatthttgcc tghtaatgata  
5281 ttaaaaaagcg thttgthtttacc cgcaccatta ggaccaatta aagcaaaaaat cthttcaccctct  
5341 ttaatatgaa aagaagthttc atthttaatagct ctaactthttc caaaatthttc agtgatathttc  
5401 ttaagctcta aaatcathttt thttgcatcctt thtttagaagg thtttttaaaa aaggaathttaa  
5461 gctthtttatc acctaaaaacc cctcgtcttg caaaaagcat tactaaaaata agaathttaaag  
5521 aaaaaactac cattthtttaagc cctggcatag agcccatatc gatacctaaag aaatcgatthtt  
5581 taatctgcat thttcatctaaa aatctcaacc actctctthttc acctataatthtt aaaatagcgc  
5641 ccaaaatagc thttcctgtggta gaacctaaagc caccctaaaac tataatthttata agcaacataa  
5701 aggttaaattc aaaacctaaat thttgthttctggag aaacagaagc aaggagacaa acctaaaagtc  
5761 ctccacctac acctctctaaa aaagcagaag thttccaaaagc aagagthttta thttccaaaag  
5821 tathttactcc catagcactthtt gcagcatctthtt catcatctct aactgcctthtt atthttgctctac  
5881 caaathtttaga ataaacctaaa thtttaaaatca aaacaacaga tatgathttgcc actccacctg  
5941 tccaataaag atthttgaaagt aagggaatac cattthttaaacc catagatccg thttgtccaac  
6001 thttggaaaatt aatcgctagt thttthttgaatga tgatacctaaa acctaaagthtt acaatagctta  
6061 aataatctcc thttgcacacga aaaaacggcaa aggcaggat thttaaagataaa acacaagcac  
6121 taaaaccagc gactaaaagc gctaatataa aagaatthttggt thttgcaaaagc aaaatgataag  
6181 gathttggatt thttctaaagcta aataaatthttc atthttthttgctc thttgagctthttaaa agcacctaaag  
6241 ctgcagcata agcacctact gctataaaaac cattthttggctc caaagaaaaac thttgacctgtga  
6301 ctccattgat thttaaattataa thttcactgcta aagthttgatata aatagcaatthtt thttgathtttaata  
6361 taccaatacc atagccatca aaaaatthttgtg gagcaagcat aataaaaagca atagccaaaa  
6421 taatataaac thttaaagccgaa atthtttaattc thttaccatthttt thttaaaacctac thttthtttcaaa  
6481 atthttatgcc aaaatthttccc thttggctctaaa aagcaagata aagacaagaa aaataaaaagc  
6541 aaaagcatct thttaaagccgg aaagthttctgg aaagaaagcc acagccataa cctcagthttcaa  
6601 thttcctataata agthttcctccta aaactgctcc thttaccacagag ccaatthttcctc thttaaaactgc  
6661 thttgccgcaaaa gctthtttaagtc caacctaaagt ccccatggta ggataaaacag aatagthttatthtt  
6721 gctcgaccaa aaaatthttccc thtttagagcagc thtttaagcagat cctaaagcaa aaacaatagc  
6781 aataatthttc thttthttgcattaa thttccattaa atthtttacagthtt thttgtatatcaa aagccaaagc  
6841 acggatagct atgccgtatthtt thttgctthttata aaggataaaa aggactctcaa gcattactat  
6901 thttaaagthttacc aaaggcacaa gcagthttgaacc thttaaagthttgta ctgacactthtt ctatactaac  
6961 thttaaagthttca aatathttcggcg gcgctggaaa thttgctgthttcg gthttgaagthttaa aaatcacatt  
7021 aaaaagathtt thttgtaaaaaaa agctaatthttc thttatthttgcagthtt atthttaatag aaatthttctagg  
7081 agctthtttctt aaagthttthttgt aagcaatthtt atctatcaag atctctataca thttagaagaaaa  
7141 gatcatagaa gctacaagthtt cagctacaaa aataacaact agatathttthtt caagctcatc  
7201 actgccaaaa aaagthttthttgat thttaatgatt gataatthttgga gaaaaaaaat thttatcaacaa  
7261 aagagctatg thtttaagccca ccatcataat atcacctatg gcaaaaatthtt thttcagthttctaa  
7321 tacaccatac acctagthttat agcctacggc aataagthttgca thttacatactgc ctgactaaag  
7381 acctathttaca agthttgctgta aaaaataaagt agagthttccata thttthttcctaa ggathtttatag  
7441 thttatctthttata agthttthttgctthtt thttgathttthttaa thttthttctthttcac thttactacagaa cgagthttgcat  
7501 thttccactthtt atcgatgcta ataaacctcag aaactcctthtt atagthttgthtt gthttthttggthttgaa  
7561 thttthtttcatt gatacactca cthttgthtttaagthtt thttatthttthttggca agcathttcata gcathttaaaca  
7621 thttacaaaata agcatccgca cccatagctg thttaaaatthttgg aacctctthtt cthttthttgathttthtt  
7681 cthttthttgcata thtttagctata aaatctthttgc thtttagctgggt thttgtaggatha thttthttgcatcaa  
7741 aactatctgt aaaaatataat cctthttcactthtt cattgctcctgc thttaatthtttaaca aaagthttggcat  
7801 ctgcaactcc atcagctgaa cccatthttgggg thttthttaaacc thttataagctthtt gctthttgctthttaa  
7861 caaacaaga agctthttcacta thttataaagthtt gaaggaatthtt aaagthttcagga thtttaaaatthtt  
7921 thttatthttgagthtt thttgctatthttgcc thtttaaaatctthtt thttatctgcccga atthttactctaa aggthttthttta  
7981 aaatthttcgcc gccctthttagcc thttaaatthttt thttthttcaaaagc cthtttagcaagc cctaaagaat



8041 aatccgtgct ttgatctact acaatcacag cttttttgtg gtttaatttt tcaaaagcat  
8101 acttttgctaa agatgagcct tgaaaactat ccataaaaca aaccctactt gaatacaatt  
8161 tgttttccaa aagcttatct cctgttgacag caggagcaat aagagggact ttattttcct  
8221 cagctatacg cttactttgt aaagtatttg cagtaacat ttcaccaata agccctaaaa  
8281 cttatcttg atttacaaga cgggtagcag cacttgacaga ttcgatttta tctcctttag  
8341 tatctaagac aacgagatta attttatctc cattgtctaa agtactttgc atttcattgg  
8401 ctaattttat accctctaaa gcactttgcc cataagctgc tgttgcccca cttaaaggca  
8461 aaacaactcc caaatttact tcttttgctt gcaaacttaa agccaaagcc gctgctaaga  
8521 ttattttcct tttcattgct tttccttatg gattgattaa agttttataa acttgcttgc  
8581 catcctgtat ttcttttata acaacaggac gaaccgcatt accacttgca tcaatactga  
8641 taattccgcc cacgccttca taattgcttg tttgggtaat tttttcatta atacactcgc  
8701 ttgtaagtgt attttggcaa gcattcatag catttagcat tacataataa gcatctgcgc  
8761 ccatagctga aaaggctgga agatttctat tgccttttat tttttcatac tcattgataa  
8821 aagttttacc gcgagcagta gaagggttgc ttgaatcaaa actatctgta aaaattactc  
8881 catttacagc agttgaacct aaatctataa aagtttgatt attaacccca tctcctgcag  
8941 ctaacaattt atcaaaaacca atttgttttag cttgtctagc aataagagca gcttcgggat  
9001 gataaattgg catataaaca aaatcaggat ttaagctttt aagctgtgaa accactgctc  
9061 taaaatcttt atctcctgaa ctgattgcaa gttttttgat aaccttacca ccattttcct  
9121 ttaaagattt ttcaaaagcc tttgcaagtc ccaaagaata aacattactc tgatctataa  
9181 taacaacagc atttttaaaa ttttaattctt ttgtaacata atttgcaaat ttgtcacctt  
9241 gaaagctatc gctaaaacaa acacgagaag cgtatTTTTT attgtctaag agcttatctc  
9301 ccgaagctac tggagcaatg agtggaattt ttttatcttc tgcaatcgaa atagcttgta  
9361 tagtatttgg tgtagtagcc tctcctataa tccctaaaac cttatcttgc gctataagac  
9421 gattaaccgc acttgtgggt tcaagcttat cacctttagt atcaataacg atcaatttta  
9481 cttcatcgcc attatctaac ttagcattta gtttattggc aagttctata ccgttaaaaa  
9541 catcttgccc ataagcagct actggtcctg tcaatggcag cactactcct aaattaattg  
9601 tttttgcgta caagcaattt gccaaagcta aggcactgaa aactaaagta atttttttca  
9661 tcttatccat ctttctgtta aattaaactc aatatcttat tttaaaaaag tattatgctt  
9721 cgttttttgt gctgggttctt cttctaataa atcttttact tgcaaatcaa cagcaaaatt  
9781 tccaccctta atatatgcaa tgatattatc catatcatca tggcttaaat ttctagcata  
9841 aaaagccatt tgcgatgcat ttgcagaagt gctaccatca agagtatagc ctaccaaggc  
9901 tgctttaata tcctcaggag acatatcttt taatgttcta gaacctacga cacttttttc  
9961 agcattatct ccatggcaag tattgcattt attcttaaaa tataaatcct tagcctgaac  
10021 catatcatat tgtttatttg catcgaaagt ataagtgaaa aaagatttca aatttatacc  
10081 aaaaagtgct acaacaaaaa ctgaaaaaac tgctaagtaa cgaacatat cttacctcta  
10141 ttttatagtg atttctgtgc ggtttgtgac gttgtgtttt ttatttttat tatccgtttt  
10201 cttactctt tgcgtctcgt atctataacg cacaacacct gaaacttcaa catctttaa  
10261 aacttcatcc aaggagccg cataagaaaa agttaaaaca ttaataactg ccaacaagat  
10321 caaaactagc tttttcatat atcaccctta caaacaaaaa tttcaattat atcaaaaaaa  
10381 gataatcaag tttcaatgct cgcccttgtg caagaaataa agccccacac aaagagctaa  
10441 aatagatcca gcaagaaaag ccatatctgt aggagtggca aatttcattt gcaacactct  
10501 ttgaaaaaaa ttgaccacta aaaccatgat aatcactttt gcaagcttat ctttaagctg  
10561 atctagacta tgtacttcta agactttgct ttgttttgtt tgtttaaatt cttctatctc  
10621 gctaataaaa agctcataaa caccaaacga aaaaataaat aaaaccaaag ccataagata  
10681 aagatccaca gtcctataa tcaaagctac cacatcttca tgcaaatcaa tcttaaccga  
10741 aatgctgaaa aaatattgat aagtataaag aatgactttt aaaacatcat aacttgcgat  
10801 aaaaaataaa acaaaagcac ccacaaggcc aaatattacg ggtaaaattg taacaatagc  
10861 acttttaaca agtaaggatt caaaaatttt ctctaact cttttactcc ttttatttat  
10921 tttctagttc tagccatttt tgagcaatgc gactgcatt tgtagcagca cccacacgaa  
10981 tttgatctgc tacacaccaa agatgaagta tgtttttatg tgaacatct aagcgaattc  
11041 tacctacata ggtttcattc gtatcgctag tcattaaagg cataggatat tttttatcct  
11101 ttggctcatc cataacaata acactcggcg cattttgaag tatactctt gctttattta  
11161 catctacttc ttttgcaaaa tgcatagtaa ttgcctcact atggcttctt aaaacaggaa  
11221 ctcttacaca agtagctgaa atttctaaat ttttatgaag aattttttgt gtttcattga

11281 tcattttaag ctcttctttt gtatagccat tatccataaa tacatcaatt tgaggaatca  
11341 aattaagtgc tagagtgtga ggaaatgttt gagcttcaaa ttcacatcaagc ttgaaagcaa  
11401 aaaagctttg catcgcacga actaattctt ccataccttc cttgcctgct ccacttgtag  
11461 cctgataagt gcttacatca acacgcttta aatcaaaagc atcatttaaa ggttttaaaa  
11521 tatgcacccat ttgtatagtc gaacaatttg gatttgcaat aattcctggt tttttccatt  
11581 cttaaatatc ttcaggattg cattctggaa caaccaagg cacatctttt tccattctga  
11641 aatggcttgt attatcaatc accacagcac ctgcttcac ggcaaattta gcatattttt  
11701 cacttatgct tccgcctgca ctgaaaaaag ctatgtctac aggattttct ctaaaaacat  
11761 cctcagtaag ttcttttatc ttataagact taccctaaa ttctatttga ttaccagcac  
11821 tttttgctgct agctaaaggc aaaatacttt caactggaaa atcaagctca tctaatacat  
11881 ttaaaagctc ttctccaacc gcacctgttg ctccaactat agctattttt tgtttttttg  
11941 acattatttt tcctttatct tgtattgttt aattttattg tttaaatttt ctacactcat  
12001 tccaagttca ttgcttgctt tttctttatc aaattccat tgttctaaaa tttgctctaa  
12061 taattctttt tctaaattct ttacatcttt ttttacactt ctggcttcta aaaataaatc  
12121 ttgctctgaa atttccaatc cctcacttaa aatacaagca cgctgaacta tagaaataag  
12181 ctctcttata ttgcctggga agttgtattc tagtaaggct ttttgagctt cttgactcaa  
12241 ttttttcatt tcaaattcat attctgtgca tgtattttct aaaacctttt gagctatacc  
12301 caaaatttct tcttttcttt ctcttaaagg aggtatatta ataggaactg tgtttaagcg  
12361 ataatacaaa tccgatctaa attccccctt atcaatctta tcttgcaaat ttgcattagt  
12421 tgcgctaata attcttcatc ctatcttaat acttttagta cttccaagtc ttgtaatttc  
12481 tttttcctgc aaagccctta aaagttttgc ctgaatttca taaggcattt cacctatttc  
12541 gtctaaaaat aaagtccgt tatttgccat ctcaaaaagt cctattttgg tagcattggc  
12601 atcagtaaat gccccctttt caaatccaaa aagctcactt tcaattaaat ttgaaggaat  
12661 agcagccata ttaatagcta caaaagggtt ttgagagcgt ttggaatttt cgtgaataaa  
12721 acgtgagaaa acttccttac ctacaccact ctgcacaaaa agcataaccg atgcatctgt  
12781 tttggcggct ttttgactca agtttaaac ttgttcta atcagaac ttgagaaaaa  
12841 accattttct tggttttctt cttgcttttt tactttttta tccgcagttt tttctcgaat  
12901 aacttttgctg cgcttaatgg cttcaactaa agtttctata tcaaaagggt tagttaaaaa  
12961 atccttcacg cccaaacgaa ctgcttctat agcacgattt aaagtgcgat ttctgtcat  
13021 gataataaaa tcatatttat tttcgaagc cttgataaat tctaattccat caattccagg  
13081 catattaata tctgtaataa tcaaatccgt atccgaatca attttcttta aagcttctgt  
13141 ggctgatttg taagatttta tttgaaattc ttcatattcc ccaagagcta tttcaaggga  
13201 ttttcgcata ttgatcatc cttcaacaat caccaaattc ataactagcc ttcgattttt  
13261 tagcaataaa tagcaaaata cggcttaaat ttactttttt ttaagataat aaatcaaagc  
13321 acttctttct ccaattcca cactaaaacg caagggtaaa attttaacat aggtttcatt  
13381 ctgtgccttc aataaatctg tcttaactat atccttcaca gaaattttag caccataaaa  
13441 acaatgcctt aattcatctt tgtgagcatt taaaaaatca aacttaatag cttgggcat  
13501 atcatcatct atcataccca attctgttct tggaagtttt ttttaagtcat tctcagtata  
13561 agaaatttcg caagcaaatt cacttatagt atctttactt cgcgtcattg caggagataa  
13621 attttgactt tgatgaaaaa ggattaaatt tttattagaa agttctgccc aaaatataaa  
13681 ttcacattgg gcaattagtt taaaactaaa aaatattaat aagcaaaca tttttccac  
13741 ttgtctgcat caatcttaag ttctacgtta actctgtaaa gtccttgatt aaaatttca  
13801 tcaattatgc tagcattttt gattaaacca tttacttgcg cggttatagt tgagcttcta  
13861 agcattgcat cttttacagt gtctttacca ttaactttaa caccataaag tttacttgca  
13921 agctgtctat aagcatctgt aatcgcagct ctttttgcca atgctagagc ttgagcactt  
13981 gaaacagtat taagaggagc aattccttct cctacggcac taaagctaag ctgcctttca  
14041 cttacatcag gagctagcat tttttcctct ctgataatat cgcgaacatc atccttatct  
14101 actttttgaa cgacaatatc tgatgcttga gccgaagtgc ttgcattggt tggattttta  
14161 gctgtagtat tgtttgtact cgctgtacac cctgcaaaaa ttcctgctat tactagcata  
14221 aaaaaaatt ttttcatatt tacaccttca aaatattgta attatttgat aaaaaagcaa  
14281 aaagcgttcc aactcaaata actattctaa atttaaatct aagttttcat cacctaattc  
14341 atcctcaagc tcttctttag gacatttagc gatgctaacc acctcgtcat tttctacatt  
14401 aactacaata acgccactag tatttcgccc cgcttttcta atactttgca tatcaacgag  
14461 tatcatttta ccgctgcttg ttagtgccat taaatccata ctttcatcta caattacaac

14521 gctgataagc tcttttagttt tatcggttag cttcatacag ataacacctt ttctctctct  
14581 gctttgaagt ctatactctc cagcatttgt tcgctttcct atacccttag cactaatact  
14641 taaaatctct tgctcgtcgc tttctataac aacagcacct actaattcgt catttttctc  
14701 tttaaactta atagctgtta ccccacgact tacgcgacca atttcacgca cttttgcaag  
14761 aggaaattha atacacatac cttttttagt cactgcaaaa agcattttgc cttaatgga  
14821 ttcaatthaa ttttcatcag agtttatatt ttcatacatta agactgtcat catctaaaag  
14881 tcttatttct tcattctcat ctctttgaac gataatagca gtaactaatt catcattttc  
14941 atctaagtta atcgctttta cacccacact tctgatattt tgatattcac ttaaattggg  
15001 gcgttttact ataccatttt tagtaaagaa acatagggat ttattttcat caaaatcagt  
15061 agtcggaata atagccataa tcttttcatc agcttgtaaa ttaatcaaat taacaaccgc  
15121 ttttccttta gctgttcttg agccttcagg tattttataa acctttaacc aataaagctg  
15181 tcctctatca gtaacaaaca ttaatgtatc atgggtattg gcagtaaaga agctttcgat  
15241 aaaatcatca tcataagttg ttacagcaag cttacctttt ccaccgctt tttgtttttc  
15301 gtattgttta cttggctact ttttgatata tccacgatga gtaatgggta cgaccatatt  
15361 ttcattaggg attaaatctt caatatcaat atcatcataa tcactttcta tttgcgtaat  
15421 acgcggtaca tcaaatttgt tttttatctc ttttaattca tctcggataa gattttctag  
15481 caaagtttcg ctttttaaaa tctcatcaag tcttgcgatt tctttcataa gctctgcaag  
15541 ttcattttca attttttctc tttcaagtcc tgttaaacgg cccaatttca tatctaaaat  
15601 cgcattagct tgaagctcgg taagtccaaa tttagccacc aaagaatctc ttgctgtagc  
15661 attatcagga ctatttttta tcaaagctat aacttcatca atattatcta aagctatttt  
15721 taaaccttct aaaatgtgag ctcttgccct tgctttttga agttcaaaaa ttgttcgtct  
15781 gataatcact gtttttctat ggtttaagaa aagatttaaa agttcaatta aagaaaagat  
15841 ttttggctct ttgttgtaaa tagcaagcat aatcacgcca aaagtgcctt ccattgtggg  
15901 agatttaaaa agattattaa gcactatctc gctcattgcc tcacgcttga gttcgattac  
15961 aacacgaatt ctttctctat cactctcatc tctaacttct gaaattcctt cgatttgctt  
16021 ttcttttaca agctctgcaa tttgctctat aagccttgct ttattagtct gatatggaag  
16081 ttcacttata acgataatgt ctttattgga tttttttct atgtgagttt tagctcttat  
16141 ttttacccta ccacgccctg tgcgataggc ttcgataata ccctttttgc cataaattat  
16201 cccaccagtt gggaaatcag gacctttgat aaattgcatc aagtcttcta aactcgcac  
16261 cttatgatca agcaaatac aaagcccatc tacgagctca ttaagactat gtggagggaat  
16321 atttgtcgcc atacctacag cgataccact agagccattt aataataaat ttggcaccct  
16381 agcaggtaaa acatcagggt cactcatgga atcatcgtag tttggaacaa aatctaccgt  
16441 atctttatct atatacagca aaagtcttct tgctaaaatt gtcattctag cttcagtata  
16501 acgcattgca gcggcgccat caccatcgat agagccaaag tttccttgct catcaatact  
16561 tggataacgc attgaaaaat cttgtgccat tcttaccag gcatcataaa cagcagtatc  
16621 gccatgtgga tgatacttac cgatgacatc ccctactata cgagcagatt ttttatatgc  
16681 acttctactt cctaccccaa gatcattcat agcataaagt attcttctgt gaacaggctt  
16741 taagccatct ctagcatcag gaagtgcacg accgataata acgctcatag aataatctaa  
16801 ataactactt ttaatagaat tttctatata tataagttca atatacagaat ctttattaaa  
16861 aatattctcc atcaattttc cttcgaatt tcaaactatt attatagcac attaaacttt  
16921 tgcacagct aaaacaaccg caaaaagaac agaaatttta ttttttcta aaaattgttt  
16981 agcttcaagc aaactagaac cggaggatac aatatcatct actaaaatta caggattatt  
17041 aatctttttt aagagtttaa aatttctttt attatcttgt ctaaatttta aactttttcc  
17101 agaatatttt agatgatttt gtgcatgtaa ggcaccaa atacaggcttaa tagattctgt  
17161 ctttaaata tttgctaaga tggccgaatg agaataaagc aaattttcaa ctctatcatc  
17221 taaagggata acattaatth gctcatttac agaaaaaaaa ttttttaatt taaaaaaaaact  
17281 taattttgcc aagaaatgaa atacaaaata accataaaat ttatgttttag cgtgcaaaag  
17341 atgtttatc tcgtgatatt tataaaaaga gtaaaactta aaatcttttt caagttctct  
17401 tacgcctaaa gaaaattccg ataattcttc agcgcaatga tgacaaaaac aaagcagagt  
17461 aaaaactccg caatttaaac atttcaaagc tctgagatta tactcgctgc tttatttgcc  
17521 atctgtttta taagtaaatg tgtgtaaaaa ctgatatttt ttaaattttc aaaaccttga  
17581 acatcttggt tagtacgcaa ggtgaatttt ttatttctat tgatattcatt taagcttaat  
17641 actccaaca gtcttgaatg tagcccaaaa ctatcttgtt ttgcactata gccaataaaa  
17701 gcaaggtcaa ttttagttac atagggagaa ttggctttat tatcatcaag gacgataata

17761 cctcttgctt caagctcttg ttttaataa acataaaaa cagcattaaa atcaagattt  
17821 acaaataatt tttgtccatt ggcattaagt actttttggt cttcttttaa atcataaaat  
17881 ctatgcaaat aaactttttt taaagctacg cctgtatcta aagttctttt atttgcacaa  
17941 cattgtatcc caatatcgct aacatataaa aggcttttaa tttttgcttc aaaaccacta  
18001 gagctctcgc aaggaacaca ctcggaagct ttagagagtt gatttacttg agtaaaagta  
18061 ttttgtttgc tcgcacaagc atttaaaaaa aaagccaatg ctataaaaaa taaaattttc  
18121 ttattcatct tttctcctta aaaaatattt tgaaaaatat ttttcaaaat tgtattaaaa  
18181 atataagtaa atttcaagag atatttcaaa tttgattaat caatcttaag cacacttaaa  
18241 aatgcctctt gaggcaaatt taccttacct atagccttca ttcttttttt accctctttt  
18301 tgtttttcca aaagctttct ttttctagta atatccccac catagcattt tgcggttaca  
18361 tttttacca tagacttaac cgtttctctt gcgatgattt tattgcctat gcttgcttga  
18421 atagccactt caaaaagctg tctaggaact atttccttca tagcactcac caattctctt  
18481 cccttgcttt gtgctttttc atttggcacg ataatactta aagcatcgac attttcaccc  
18541 gctactttaa tatcaagttt taccaaatcc cctacacgaa attcaatagg ctcataatca  
18601 aagctcgc atccttttgt caaagacttt aatttatcat aaaaatccat cacaatctca  
18661 tttaaaggta catcgtattc taataaaacg cgctcaggag tgatataatc catcttaacc  
18721 tgcactcccc tttttcgatt taaaagagtg attaaatttc ctaaaaattc actaggagtg  
18781 attatagtag cttttacata aggttctttg atatgatcaa tcttattaac cggaggtaat  
18841 tcgcttgat tttgaatttt tataagctct ccatcagttt gataaatctc ataagttaca  
18901 gttggtgctg tggcgattaa atcaagatta aatttctctt caagtctttc tttaatcact  
18961 tccatgtgta aaagccctaa aaatcctacc ctaaaaccaa aacctaaagc caaagaagtt  
19021 tcgggctcat aagtgatgga gctatcattg agttttaatt tatccaaagc atctcttaaa  
19081 tcttcaaatt tatctgtttc tataggataa agtcccgcaa atacaaaagc cttagccttt  
19141 tcaaatcccc ctatggcttc cttggcttta tttttacta aggttatagt atcacctact  
19201 tgcacatcgc ctacggtttt aagcccaagc actacaacac ctacttcacc tgattgtaaa  
19261 gattgggttt taatagggtt taaaggatga ggataaaaaa gatcttgaac tatatgtttt  
19321 ttttctgtgc tcattaccaa aacttcatca tttttagtaa tgcttccttc ataaattcta  
19381 accaaagcca aagctcctag ataattgtca aaccaagaat cataaatcaa agcttttagta  
19441 ggtgcttcat catctgtttt ggggtgccgga attttagtga taatagtctc tataagttct  
19501 ttaatgcca cacctgtttt agcgcctcag caaattgctt ccttgcagtc aattcctata  
19561 atatgctcga tttcgtgttt tactttttca acatctgcat taggcaaatc gattttatta  
19621 atcactggaa taatttcaag attgttttca agagcgatat aacatttagc tatggtttga  
19681 gcttcaacc cttggcttgc atctactact agcaaagctc cttcacaact tgccaaagag  
19741 cgactgactt cataagaaaa atccacatgg cctggagtgt ctataagatt taaaataaaa  
19801 ttttcattat taaatttata atttaatctc acagattgtg cttttatagt aataccgctg  
19861 tccttttcta tatccatagt atccataact tgtgagctca tttgcctatc gctaatagct  
19921 ccacattcac ttataatcct atctgcaagc gttgattttc catgatcaat atgtgctata  
19981 atggaaaaat ttctaattt ttttaccgac aaaataatca tcctaaatgt ttttttaaat  
20041 ttttgataag gatttttagca aattttctgt ttaaaacaaa taaattttta ttttgaaaaa  
20101 acttcaattg aaatttataa aaagcatatt aaaaatattaa atgttttaaaa aatatttaac  
20161 tcttatccac aaagctataa ttttggtttt tttaccctta tcattgtctg cttcaaatct  
20221 gcgcaagatt atagcactaa gtcaaaccaa tgaacaatat ctcatnaaac aatgcaag  
20281 cgagcaagca agtttatcaa gaagtcaaac ttttagaaat tttttaccta gccttagtct  
20341 aaactcagcc tatatagcaa acaataaaga ttattttatc atcaatccta aagaaagttt  
20401 atttgccaag ctttctctta atcttttgct ttatgatgga ggtgctagag aagcgaattt  
20461 aagagcctta gaaagcaaag aaaaactaag tcttttagat aaagaacaaa gtaaaaacta  
20521 tcttgctcta agtgctataa cactttattt taatacccta agtcttgaag aaattttact  
20581 agccaataaa caaaaggttg aatttttaag atctactttt gaaagattac aaaaatttca  
20641 tgatgcagga ctaagcccta aagatgaact tgaagcatt aaagctaaat atcatttaag  
20701 tttgtagaa ttaagccaaa atgaattaaa actcactagt atacaaaag aaattagaat  
20761 tcttagcaat acaattttta ctctagtgg taatgctttt ttagaaaacc ccaatcaaga  
20821 aaaaagtcaa agttatgaag tgtaaatagc aaaagagcaa atcaatctag ccaagaaag  
20881 tgtaaattha gctaaagctg aatattttcc taaattttat atccaagata attttggctt  
20941 ttataaaaaa aattacagtc cagaaattcc agtatattat caaatgtag ctgatcgatt

21001 tttaaaaa tattctcaaa ataatcaatt tatcttaggc gtagagtgga aaatTTTTga  
21061 ctttaacgca agagctaaag aagtagaaaa agaacgctta aatgttcaaa tcgctaatagc  
21121 caatgcaaga cttagtgagc gtaaaaacaa agaagaatta aattatatta atcaaagcct  
21181 aaaagtctta aagcaacaaa tttatacttt aaatTTGagt ctaaatgccg caaatTTtagc  
21241 ttttgagagt gtggataaaa aataccaagc aggacttggt tcttatgtag aatatttaca  
21301 agccttagaa gccaaattta aagcgcaaag tgatttggaa ttagcccata atgaatttga  
21361 aattactaag gcaaatattt atTTtaatgc cggatatagat cttactcaa aggttagaga  
21421 atgaaagtga ttgtattttt aatattttatt tTTaatttag cTTTtagtga ggaaatttac  
21481 gcaagtttta atgtagaagc tgccaagcaa agcaaactag cccttgaaag tatgggttta  
21541 gtagaacaaa ttcctgtaaa gatcggacaa agggTTaaaa aaggagagct tttgctttcc  
21601 ctcgagcaaa caagtgaaaa aatttcattg caaaatgcac aaaattctta taaacttgct  
21661 cttatagaat ttgaaaacac tcaaagcaaa atgaaaaaat ttaatgcagt agaaaatgtg  
21721 atagacaaac aaagctatga ggatatgaaa gctaaatttg aagcagcaaa tcttaattta  
21781 accaaagcaa agatcaatgt agagtattat aaaaatatct tagcaaaaaa agaattacgc  
21841 gctccctatg atgccatagt ttcaaataaa tttatacaaa ttggagaagg agtgggcgga  
21901 gtagcccaac cttaatcga aatTTTTtca taccacaaa gtaagcttgt tTTaagcttt  
21961 gatgaaagat ataaagatca agTTaaata ggtgatgaat tTTtatacaa aatcgatcaa  
22021 agcaatacag aatacaaagg aaaaatcact cttatttatc caagtattga agTTaaaaca  
22081 agaaaaattt atgctgaagt agagacacaa aatttaacac ctgggctatt tggcgaaggt  
22141 agaatcatca ctagagatta aaaaatgttt aaactagcta taaatcgacc tgttacaatg  
22201 ctaatgttct ttttagcttt gatgcttttt gggatgattt ctgctttaag tatgagtga  
22261 aatttatttc ctaatgtttc cataccgctt ataaaaatca caagtaaagt taatggggat  
22321 ttaaaatttg tagaatctaa aataaccaa gagatagaaa ataccctaag tgaaattgat  
22381 ggagtaaaaa ctatcacctc agcgacatat gataatttta gcgtaagcgt tgtagaattt  
22441 aaactgggaa aagatcttga agtggctgct aatgatgtgc gtgataaaat cggcacctta  
22501 agcctacca ccaaacctga aatcgagaaa atcagctctg attcgggttc tgctatttct  
22561 ctttttgtat attctaaaga taaatTaaat cttatgcgcg aatcaatga taaaatcaag  
22621 ctttttttgc aaaggattga tggggtagga aaaatcgaag ctaagggttt tttagagcct  
22681 caaatcgtg tagaattTaa accaaatgaa cttgaaaaat acaatcttaa cgccttagaa  
22741 attgccaata ttatcaaaaa tcaaaatttt aaacaagctt taggagagct taacaataac  
22801 caaaataact atatcatcaa aggctatttt gaagctacaa atttagaaga acttgcaaat  
22861 ctccgtatta aaacaggagt ttttttaagc gatatagcca atatctcaa tctctatgaa  
22921 gatgaaaaac aaagtgcgat ttataaaaac caagaagggtg tacttttTaga gtttagaaaa  
22981 atcacaattt ttaatactct taaaatgatt caaaatgtca aaaacgcctt gccaaattta  
23041 gaaaaacaaa tttctaataga tataagtata gaagtgcctt atgataaaag tctaaatatac  
23101 cacaaacacc tttctcaagt tttttttgat atggttttgg gaatTTttct tactcttTgtg  
23161 attgtatttt ttttttaag aaattTaaagt gccactttaa ttgcttgcat agctatacct  
23221 acttctatca tctcaacctt ttttatcatt gatcttttag gctatgatct aaaccgctta  
23281 acctttatcg ctcttacttt aagcatagga atttttatcg atgatgccat agttgtaatc  
23341 gaaaatatcg ctaaaaaatt aaagacttat ccacctttgc aagctgcttt ttttaggcatt  
23401 agcgaatatag gcttttagtgt tTtaagtatc agtatagttt tactttTgcgt ttttatacct  
23461 atttcttata tgaattctat tccgggttta ttttttaatg ctttgggcat aagtgttgca  
23521 agcggtatag ttataagttt ttttagtttcg gtatTTtttaa ttcctagttt aagtgctaga  
23581 tttttaaatc caaaagaaag taaatTTtat gaaaaaacag aagcattttt tgaaaaaatg  
23641 gaacaaaaat acgaaaattt actttataaa atTTtgaaaa acaaggccaa atttatccta  
23701 gctactctta tttttgtagc tctttctttt gctttggcta cgcgtatagg gcttgatttt  
23761 ttacctatgg aagatgatag tgaaattcaa gttttacttg agagTaaaaa agattTaaagt  
23821 ttagaggcca tgaaagaaaa aagtcttcat ttgcttgaaa aaattcaaat ggaagaaaaat  
23881 atagcttatg cttttttact tctagcttat gatgatgcta aagatagcac aaaggctaaa  
23941 atttatatca agTtaaaagg cttagaagaa agaaagctaa gacaaaatgc cattgtcaat  
24001 ttatatcggc aaaaattcca agatgaggat tTaaaaatca aaattctaga actacctaaa  
24061 atagaagggtg cgggtattga tgatcctgtg caattctTgg ttttaggaga ggattTaaaa  
24121 agctTaaaag aagcagcctc gcgtgctaaa gaaattctTg caagcaatac acgtattTga  
24181 gatattaatg ataatgccga tatgataaaa tccgaagtgg ctctacatat caatagagaa

24241 aaagcaaagc tcttagatgt agatcctgaa tacatagctg gaatthttagg atattctttt  
24301 gcacaactta gcataggaag tatggataga gggaattcaa aagatgatat tatttttaagt  
24361 tttgctccac aatthtaaaa agatatagaa gctthtaaac gtatcagtat taaaaataat  
24421 aagggtthta atthtagatct tgcaagcgtg atcgatthta cttatagtga ggatthtaaaa  
24481 actatcaatc gctacaataa aatcgatcg gthtaaatca ctgcaggggt aatgatctt  
24541 tctthtaggag ctgtccaac actcttgctt gacaatatag atactattht aggcgaaaat  
24601 acaaacctaa actatactth ttccggctth atcaatctth tagacgaaac tgtacagggc  
24661 thtatagtag ctgttattht ggctthtgth ttaatthtc ttgtthtagc tgcactgtat  
24721 gaaagctthta thttacctct tatcattatg ataacctatg cthtggtctth tggcgggtact  
24781 tccatagggc thtttataag cggacataat thttcactth ttgttcta atcgccattatc  
24841 ttgctthttg gaatggtagg caaaaacgcc atcttacttg tagatgttg caataaaaaa  
24901 tgccacgaag gcttagatcc tgacgaggct cthttaatag ctggaaaatc gcgcttaaga  
24961 gctatcttga tgacgacatt tgctatgatt thtgctatgc tacctctagc cthttcaaga  
25021 ggggcaggat atgaggcaaa ttcacctatg gctatagctg thattthttg acttataagc  
25081 tctactthac thaccttact tgtagtacc gcactththta aattctgctt taaacttgat  
25141 actagattaa gaaaaatthta tgaaagagag aagataaact aaaagactga ttataaagtc  
25201 thtttaggtat tgtthttata aagagcttht aaattatcat aagcaatthg tattthttca  
25261 aattgttctc ttgcataagc ttgctctatg gcactthtg cttgataaaa atcaggatga  
25321 taaagctthta ccataatcaa atatthtatgt ctaatctcg taagatcgth ttgtggggta  
25381 cattctaagg tattaaaata attactaaag agthttggcta gggcattaaa thttcatttc  
25441 atatthtctt tattatggat atthttgacga aaatthttat actcttgacg atcaacttca  
25501 aaattaacac aatatthta atgctcactc tcatcagcaa aagcttcaaa aaattcaaaa  
25561 gtgctthcat thttataatc taagatcaat atacgagtca thttcattgta thctatacaa  
25621 tgctctthta aatagthttt catataggta acaaaaagth thttcattgta actgagcttc  
25681 attaaaatct tatcccagc aaaatcaacc ttgataaaca acatgggtht aagcacattg  
25741 thttgttcaa aattaagcct aaaggthttta aaatgcgcat cthttaaat thctatgctt  
25801 tcgttagaac thttgcgata cthttgatct aaaactthta aaaaataacg gcgttggtga  
25861 atthcattct cthcaaaaa agaaaaatc thattthttac gccctaccac cthttgtgaaa  
25921 thtttggtaa tcaagthttt aaaatactga aaaacattaa tatcatcggt attaacattg  
25981 atagthttcta aagthttgcac gatctgcac tcatctctc cataaaatct cattctcaaa  
26041 aagctctctt gtgcctthta aaatthcatt ggggtgtataa tcggcttht acgataaaga  
26101 ttgacactth thttacaaa atcctaaata aatataatth aatthttctt thttggctat  
26161 ctctatthta ttaagtagag aaaatthacc taaagaaaga tgagaaaat ctggatcata  
26221 aaaacaataa atactagaaa thccatctc aagthctatca atcaaatcca cacaaacaag  
26281 ctatctctc acataaaaag caagctcata gccaaaatc ataaatccat caatataaag  
26341 attataatat tgtctgaaat thaaatcgta thttthcca gthctthttc thttcataaa  
26401 acggtgatat thtatcatata aaaacaaatg ctactactt agcaaaggth thcttagtat  
26461 aatcttggtta thttgactth tattaatcac thttctthca ctgctgaaa atthtatactc  
26521 atctgcaaaa atthctaagac thaaacactc thttacaatc ttgcaaatag ggcgagaaaa  
26581 atacctacca aaacgacgc aaccacgcct gatgagcttg ctattaatth cthttggagca  
26641 atthttctata tathttgtact ctatcttaga gcgctatct thtagataag gacactcatc  
26701 thcaagagta caaaaacct tctctagcat taaatthttc taatatctgc atthtttaata  
26761 aatthcaaaa actcatctg caatthctct tgtthtaaaa aaactcttg cattctthta  
26821 thcaagctca thctcttgth ctgtgthttt atctcttht tgaaatggct catatcttht  
26881 thattthgat thtttagggct thtttgthtc thtagaatcg thttgactth thttthttatg  
26941 ctctthtagac tgcataaaaa atccattat thctactthc gcgtatthtc thcaaggtag  
27001 ccgctgattg agcaataact thttctthgt tatctgatg gcgatctthca gtatthttcta  
27061 ataattcttg catatgtgth thctatgaaag aagtatcaaa atacctctt ctaaatctc  
27121 ttgtthtagt aatcgctatc aaaaatggta tggthttct aatatctatg ataaattctt  
27181 thaaagctct thcaagthta thttaccgta aatcataact tgtagcttht atgattaat  
27241 ttgcaagcat agaatacaaa taaggaggta cagtataatc thttataaata tggctatcca  
27301 ccttacaga tggccaagt gctggataat actcccctat cthacctgga cthttggaataa  
27361 aatthttcca tacatthttca gccgtaatc thgtctctat agcaaaacct cthttgctgga  
27421 tatcactthg thctaaatct aaaatthccc cacctgcgat acgaatthga cgcacgatta

27481 aatccactcc tgtgatttct tcagttacag ggtgttctac ttgaattctc gtattcattt  
27541 ccataaaata aaaacggtta taatcatcaa gcaaaaattc tatcgttccc gcattagtat  
27601 atccaacagc cttagcagca gccacagcag taacacccat agtttttctt agattatctg  
27661 aaattccagg acaaggtgcg atttcaatca ctttttgatg tcttctttga atagaacaat  
27721 ccctttcgca aagatggata atatttccat aattatcccc taaaatttga aattctatat  
27781 ggcgaggatt gactacatat ttttcataa acacttcatc attattaaaa taagtcaatg  
27841 cttctctttt acaagaatca aaagcatttt ctaattcttc ttctttatga acgacacgaa  
27901 ttcctcttcc tccgccgcct cctgaagctt ttaaaatcac aggatagcct atcttctctg  
27961 caaatacttt gatttcatcc atactataag tatttaattt ttctgttctt ggaacgatag  
28021 gaattccatt ttgagccatt aatttacgag ctatgttttt atttcccatt ttatgaataa  
28081 cttcagattt tggacctata aaaataattc ctgcttcctc gcaagcttta gcaaaatcat  
28141 aattctcact taaaaatcca taaccaggat gtatagcatc agctccacaa gccttagcga  
28201 tttctataat tcttcctaca tccaaataac cccttatagc atctgtacct atgcgataag  
28261 cctcatcagc aattttcaca tgcaaacact cacgatcagg ctctgtaaaa accgcaacac  
28321 ttttaatatg taaatcccta caagcacgga ttacacgaac agctatttca gcacgatttg  
28381 ctataagaat cttatgaatt tgtaccataa tttgccttta taaattttat ttacatatct  
28441 catattctag caaaatatcc ttacaaaaac ttagcaaaaa atttaattta ttttagttat  
28501 aataaacttt taaattatc cgaagaaaaa attacaattt tacatgattg ccgataaaaa  
28561 attattttat ttaagttgta ttttgataag cataggtata gtattttcat attctcttac  
28621 tgtttttact gtactttttt ttgattatag tgaatttcac ttttttatac gccaaactctt  
28681 ttttgggctt agcggtatat taatcatggt ttttatctct cgcttgatc ctgataaaat  
28741 acttgcaaaa agaattatcc tagctatact tataggctct tttatatgta ttattatctt  
28801 acctttttta ccctctgcct tagcaactgc tagtgggggt gcaaagcgtt ggattcgttt  
28861 aggacctctt tctatttcac ctgtggaatt ttttaaaata ggactgattt attttttagc  
28921 ttggagctat acaagacgca ttgatgatag caaaaaagca attaagcatg aagttttgat  
28981 tcttttgcct tattgtatth tggcttcgat tgtcataggt tacatctata tcacgcaaaa  
29041 tgacttaggg caaagcgtta tatctttctt ttttaattta gctctagctt tttttgcagg  
29101 tgcgagtaaa agactttttg cttttggaat tttaatcatc atgatgatag gaataatggt  
29161 aattttttagc aaccaaaggc gtatccaaag gatagcttct tgggtggggca atatccaaga  
29221 tgctttcttg cctatgcttc ctgattggat ggcagatgct ttaagagtaa gtggcaatag  
29281 tgagccttat caaatttcac actccttaaa cgccatagcc catgggggaa tgtttggcga  
29341 aggacttggga ctaggtactt ttaaacttgg ctttttaagc gaggtgcata ctgacttctg  
29401 tctttcgggc atcacagaag aaatagggtt ttttggcttg ggggttattt gctttatcta  
29461 tctttggatg attttaagaa tttttagaat cgcaggaaga tgcgaagaaa aacaagattt  
29521 tatatthtgt tcaggcattg ctttgccttt actcttttca ttctttatga atgcttttgg  
29581 tatcatttct cttacacctt taaaaggggt tgcagtacct cttttaagct atggaggggag  
29641 ttcaatgtgg gcaatttgca taggaattgg atatgtttta atgatttcaa aaaaggttaa  
29701 gttatgacaa tagttctaac aggtggtgga acgggtgggc acctagccat tgtgcatgt  
29761 ttattagaaa gtgcatgtaa aaaaaatata gattgctgtt atataggaag tcaaaatggt  
29821 caagatagag cttggtttga aaacgaaact cgttttaag cgaatttctt ttttaagttct  
29881 cgtgggggtt ttaaccaag caaacttggg aaaatcaatt ccttactcca cacattcaag  
29941 cttagcaaaag aatgtaaaca aatcttttaa gattatgata tcaaagcgat ttttagcgta  
30001 ggaggataca gtgctgctcc tgcttctttt gctgctttgt tttcacactt gcctttatth  
30061 atccatgaac aaaattcaaa aagcggttct ttaaataaac ttttaaagcc ttttgctaag  
30121 caatthtata gtgcttttga aaaagaaatc gtaccctacc ctgtagcaga taaatthtct  
30181 gacaaagcaa gaattcgcaa agaattaaaa aatatcattt ttctaggtgg atcccaagga  
30241 gctaaattht taaacgactt agccttaaac ctagctccag aacttcaaaa aaaaggaatt  
30301 ggcatcattc atcaatgtgg aaaaaacgag cttgaaaagt atcaacaagc ttataaagac  
30361 ttaaataatac aagctgatgt atthgactth agtccccatt tagaagaaaa aatgcaaaat  
30421 gcagatttgg ctatthcgcg agcgggtgca agcacgctth ttgaactthg tgccaatacc  
30481 ctaccaagta thttcatacc ctaccctcac gctgctaaaa atcatcagta thttaatgct  
30541 aaatthttac aagataaagc cttatgtcaa atthttatgc aaaacaatac ctatthctgat  
30601 gaaatthttaa aagccatact gaagtthaaat tttagaagata thttctacaag actthaaagat  
30661 atggcgcaaa aaaatggtgc ggatathttt cttgaaaaag cattagaaac tatgaaataa

30721 ccttgctttt ataagctaga tatccaaaa tattaacaag tatgcccaca ataaaaagta  
30781 tacaaataga gcttgtaaaa ttcccaaca tatcatggaa aatccctatg atccattgcc  
30841 cttgtgctgc gattaaatat ccaaatcctt gagcaaaagc tgaaagcctt gcagctattt  
30901 ttgcattaga acttttttga gcaataaaga gcaaaagcgc gcaaaaaaca ccacccaag  
30961 gaaaccctac aataaatgca gcaagtataa tcataaacgc agtatcaaag gcaagcaaaa  
31021 ttccaaaaga taccgcatac atcgcacaca atatagctat ataagggtgta tgcaaactct  
31081 ttttaagcctt tcctaaaagc aaggggcaa aaagagaaac tggagcagct acaagctgag  
31141 aaaaaagcac catatcggtt gcaaaatcct tatcatagcc tttttctacg attatttgca  
31201 catacaaaa aaacaaagaa taagctaaaa aactttgaaa acccataaaa agagtgtatt  
31261 tccaagtggg tggatttttt aaaagattga ttttttact ctcttttttc ttgggtgcgaa  
31321 aaaaacggcc attttttagct tgagggtaat aaatcatcaa agcaataaaa gaaaaaacgc  
31381 accaaaaaac catagcaccg gctaaatcaa atatatttaa taaaggcata gataaagcaa  
31441 ttcttgctat agaagaaatg ctcaaaacaa gactataaat tcccatcatg cttgccattt  
31501 ttttaggaaa tttttcttta ataaaacttg gcaataacac attggcaata gctataccac  
31561 aacctatgcc aagcattcct aaaaataagc cataaacacc caaataagaa cggataagtt  
31621 ctgcgataaa aataagaaaa attccaacaa taatcgcacg aataggagaa aaatatcca  
31681 ctataaaaga aatgctacca aaagctatca aaggaaggct agtaagcaca cctgcaagag  
31741 tggaattaag attatactca tcttgataa tatcgatcat gggctctatc gcagtaatag  
31801 gagccctaag gttaaagtct acaattatga caatagcaac atttaaccaa aaaatttttt  
31861 taaaagaaag cattaatcc ttagttttta agtttactt taagtatttt accttctacc  
31921 atcttaggaa tccataaagt atcaccttct atgaaaatat ctgcaggacc tttaatagaa  
31981 ggtaagtcaa gttttaatac tttatcatct tctaaacgat aatcaccac gtttaaattt  
32041 tcacccaag aacttacaag caaggcattt tcataaggaa cgattccatc ataagcttct  
32101 ttttcatttt taatcacact aagttcctta tcttttaaat cataactcat cacaacaccg  
32161 ccactagcac catctggatg atatcctgct ataaaaagct tatcattttt tctatctaaa  
32221 taaagtccat taggaccgcc aaatttagcg atatcaagtt ttaataactc atcatatttt  
32281 ttcgctttta aatccacttt taaaacaagt cctgtgcctg tatcacttac taaaagtgta  
32341 tcatcattta atttttcgat agcattttaga aaaattgcac cttttatagg caaattaaac  
32401 acttcttttt tgctttttta atcaaaacca cgcaccacat caatatccac cacataaagt  
32461 gtatttgcaa cttccatcat accttttggg gcatttagat tgcttataaa tttatgctca  
32521 agcactttac catttttatc aagcttagag ataaaacat cattgtcttt tgctaaaggc  
32581 tcaagttttt cacctacatt agatacatac acagaatttt tatctacaaa aatactttca  
32641 gggcttttaa agccatcaaa ttcttgatat ttcaactcgc ttgctccaag taaacttgct  
32701 ccaacaagtg ctaagcttaa aacatatttt ttcatacttt tctccttttg ttaaaaatat  
32761 ttatgctgat tatattgatt tagatagaaa aagtgtgcta gttttttgat aaaaaataca  
32821 agttttttga tttttgatat tgcttagggg tttgattgta tttttcttta aatctctcga  
32881 taaaccaagc taccgaagaa aaagcacatt cattggctat ttcatttaca ttttttttag  
32941 aaaattcaag caaaacttta gccttttgca atcttttttc atctagccat tttttaggac  
33001 tttgtccgaa gcatttttta aattctctag aaaaagtagc aaaatcaagc ttcgcaaaat  
33061 cagccatttc actcacactt acaaattctc tcccacaata ctcaaaaagc tgtgaaagat  
33121 ccaaagaaa ttcttttaaa attccagcta aaaagcctat gaaataagta tttttattta  
33181 aaagtaaatg taaaaaatc tcttcaaatt taagactgac tataggatct aaaatttgcg  
33241 tattctcatc aaaatgagga gtgaaactct ctaaaattcc ttgcaaaatt ttatcatttt  
33301 ttacccaaaa aatttcactt tctctgcttg cttgctctag cttaaaaagt tctttgtact  
33361 tataaataag ctcgattaaa aaagcattgt caaagaaaaa caaataagct tcataaacac  
33421 cactactaag tcctacattg cttaaagtat aatttccagc ttttaaaaat aaggtttcat  
33481 aagaatcgat tttgtagtct tttgatgcag tatgtaaaaat tttatatcct tttcttaca  
33541 aggttaaaag atggctgcct acattgacaa aagaagagtg cgaggcgtt acttgcgat  
33601 attttgcaaa agtacaggat ttaaaatttt tataatccac accttttaat tgttttaaat  
33661 cttgtggtaa agaaagaatt tgctccattt tttcactctt tatcaaagca agtttctttt  
33721 gcattctaca agatattttt tcacatcttt ttcgctcatt aaaacctcac gcatgcaaac  
33781 accagctaca ttaatatctt taaaacttgc aatattttgt acattaattc cacctatagc  
33841 ataaagtgga atttgactaa aagaaagtaa agaatttaaa aactcaagcc ctcttggctc  
33901 taaatctttc ttgcaagaac tctcaaaaa atgaccaca aaagcataat ttacccata



33961 gttcatcgct tctaaaagct cttccttgct atgtactgaa gtgcctatta tatgaaaata  
34021 cttactcatc tttggctcct gccttaataa tgcaagtggc gcatgaaaat agcgggtgctc  
34081 taactttaag cactccttat caaaaaatg caaaaaacaa gttgttttgt gtttagcgca  
34141 aatagctaaa acctctttag ccaaatcata atactcaaat tcactcaaat ctttctctct  
34201 aagcacaaaa gcgtctatgc ctgatttagc aagcttttct acttgtttta gaaagtctat  
34261 ctcgacacat tttctatcgc ttatagcaat gattttttta tcccacataa atactatcgc  
34321 tcatcacagc ttgtaaattt gagtttttaa gcatagctaa aatttcatcc acacctcgat  
34381 cgtctgaaat ttcaaattgt ccacacactt ttttatcgcc cttatgctct cctataccca  
34441 cgcttactcc tgcactcatt tttgtcgcct caagttttac aacctcatct ctaaagccta  
34501 ctctttcacg acttgatata gtaatacctg caaaaggcaa aaaaagtcta taagcacaaa  
34561 gcacttgcaa aaggcgtttt tcacttacat ctttaggggtg aatttttagca ttattgataa  
34621 taggtcttaa acgaggtact gaaatagaaa tttcagcatg cggataagcc ttttgtaaaa  
34681 aatacgcgat aagagctggt gcaagtgcac cttttctaaa atcatcaatc cccaaaagtg  
34741 ctgcaaaaagc tactcctcgc ataccgcctc ttaaggctct ttcttgccca ttaaaacgat  
34801 aagggaaaaat acgcttttca ccccctaaat gaattttaga atacttttaa ggattgtaag  
34861 tttcttgaia aatggttaca taatcacagc cattttcatg caaaatttta tactcatcct  
34921 cattcatagg ataaatttca acacctaca ctttaaaata ctgcctagct atcttacaag  
34981 cttttgcgat gtattctacg cttgcaaac ctcttccttc acctgttagc attagaattt  
35041 cttgcaaac tgtttttagca atagcttgca tttcttcatg aatttcatct tcaactagct  
35101 tggctcttgc gattttattt cttttttgaa aaccgcaata aacgcattta gaattacaat  
35161 aatttgacia ataaagtgga gtaaaaagcg agatagaatt tccaaaatat ttttgcttgg  
35221 ttttagccga cttaaaagct aattcttcta taaaatcttc agccgcactt gaaagcaaag  
35281 cttttaaatt ctcaatactc aaatgtgtag catttaaagc ctcttgcact tctttagcgc  
35341 tgtattttgt ttcatcataa ttttgaattt catctaaaac cttagataaa atactgcttt  
35401 ttaactcttg catatgaggt aaatactgca tataatcttg catgatcaat cccttaaaaa  
35461 gcctgttaat ggagaactag ccttagcctc gctcacgctt gctaaacctg ctagataacc  
35521 cgctcttcca gcctgtatag ccaaagaaaa tgcttttgcc atcaaagcaa tatcctttgc  
35581 ttcagctatg gctgtatgtt ccatcactgc acttactccc atttgcatag cctcgcacgc  
35641 ttgtgcagga gttccaatac ctgcatctac aatgataggc aaatcgatct cattaagcaa  
35701 aatttgata aattccttag cgcacaagcc tttattactc ccaatagggtg ctgctaaagg  
35761 catgatagct gcagcccctg catcacgcat agctctagct gcataaagat cagcatgcat  
35821 ataaggcaa ggggtaaagc cttcttttgc taaaagtcca caagccttaa tggtttcata  
35881 attatcaggc aacaaatact tactatcacc tataacctct atttttatga gctctccgca  
35941 gccaagctct ctagaaagtc ttgcgatag caaagcctca tcggcatttc tagctccgga  
36001 agtattagc aagagtgtta ttttttagg gatataatca agtatattag caatctcacc  
36061 cgtatttgca cggcgcaaag ccagcgtgat gatttctgct ttggcttctt ctatggctga  
36121 ttttataagc tctaaagaat actttcctga tcctaaaata aatcttgatt taaattcata  
36181 ttttctatt tttaagctat cattttttaa attttcttgc attttttact cttatattgc  
36241 caaaagctct aagacaagat tgctttgatg tccagcacia atatttacac gcggtgcat  
36301 aagtccattt cccactttag caccatttac caaatccca cacacataga aatttttagc  
36361 gatttttctt gtttgatagc tattactatc gccatctct gcaagccctg aagcacagat  
36421 taaagtagta tctttgtaaa atctatgaaa attttgtgct atcatagcct ttgcaagcgc  
36481 gccgtcaaaa gcctcgcaaa ctatatccat atctttaaat aaatcgggca aatttcttct  
36541 atcgattttt aaagtgcaaa tttcggtttt gatataagga tttatttcac tgatttgctc  
36601 ttttaaagcc tcggttttaa atttcccaa atcacttacg cggttaagctt ggcgattaag  
36661 attgctaggc tcaaccacat caaaatcaat cagcttttaa taccacacac cgcttcttgc  
36721 taaatttatc gctatatgtg agccaagccc acccaaacca caaacgcca cgcgccatt  
36781 ttttaagctta tcatgaagtt ttggagtgtg tcttgccctc atcatcgcac ctagagcatc  
36841 ttttgaggt aaggtatct tttctataca aaaaagctca tcattttcgt gaattttat  
36901 attttcttct gttgcaaac cattgataat ccacacatca ttttctgttt tgcttacct  
36961 tttgaaaaaa tccaaactgg tgctaaattc tgtatctagt tctttaccat tgaatttaat  
37021 tctcatcaac cacccttac aaaactcacg atttctgctt tctggtttc ttttaaaatc  
37081 aaattttcaa attcactttt aggtataatc tctccattta attctaaggc gataagttcg  
37141 attttaaac ctttttctt gataaaatcc ataaatttaa gctctttaag ctcaaatttt

37201 tctccgttga taatcatact tttccttgaa attactcttt tattttttgc attatctaata  
37261 aattccttag attttttctt taaattcaaa cttttttata tatattttga tcttttttct  
37321 ttaaatttta atgctggttt atttttgctt ttttatgatt ttttaggttt atgtatttta  
37381 taaatttcta ataataatgata ttttaattgta tagcacttga aatttcaccg atcttaatga  
37441 catcttctag attataatct aaacgcaaaa gtaatatctt caattcttta cgaaatttta  
37501 ttttcgtagg tttattgtga aaaatttcat ttcttgcttt tctgatttga ctgagttaa  
37561 ttaataaatg ctcttttgta ccatagcttg gcaaatcttg tcctttatag cttttttcat  
37621 ttttaaaaat gggggcaaat tcactccaat gagtactgat aatgtcttcc aaatccgcaa  
37681 gataaaaaca atcaaatgcc tcccaagaat tttgcgcat tccgcctttt aaatgatttt  
37741 ttcttttatt aaaaagcctt aaaatattac tcaatccata agaattaggg ttttgattta  
37801 aaaacctga gtcgctatta tttacattgt ataaatttgc tattttgaca cataatgtgc  
37861 tacgcaacgc attttcaaag caatgcaaaa gtaaaaaatt agcttgatga gtttttctct  
37921 tttttgtata tatttgata atcaaatcaa ataagtgtc ttgtttgtat tttgctagaa  
37981 ttttttctgc ttcttgcaa gcacccata aataatcaaa atgcaatag ccaaaagcct  
38041 ttttcatacg aatttcaaaa tctttattta ataaatttgg aaaattagaa aataaagttt  
38101 taattctttc atattcaata tcttgcaaag aaaaactcac tttacacccc tgatttaatt  
38161 gtaatttatg ttttatctgt tataataata tcaatttaga gggctaactt gccgatagct  
38221 gcgaggtagt cttaaagcag aggctactct aaattctttc ttttaacttt ttactgcttt  
38281 atctaaaaat tcaatttttt atttttttac aaagcttatt ttttaataat ctctttatct  
38341 tgccaaatgt aaaattttta aaatgaaaat ttatcaaaaca tatttgttac tttgaatttc  
38401 ttaattatc tcaaacctt aaaaattctc caccaaatct ctaaaaaca gacaaagttt  
38461 ttcaattct tccacgctca ctctctcctc aatagcgtga attctatcat tacaacgcc  
38521 aaattcaacc accttaacgc cgtattttgc aaaatacctt gcatcacttg tgccgccttt  
38581 ggtattaagc tctggtacct catgagtgat tttttgcaca ctttcattca tttttgtac  
38641 gattttatta tcaatgcttg ttaaaaaagg ttcgcttgat tgcgttaatt ctgactcata  
38701 gtttaaaccg tggcaaat tttccacata agctcttaca tcttctaaat ttgtatcagg  
38761 agaattgcca acattaaaca taagtcttaa atcatttgga gtgacattgc ttacttgcat  
38821 acccccacga atatcggtta taacgatttt tgaagggcta aattcagcac tacctggatc  
38881 aagatcaaaa cccgctaaaa gttttaaaac cgggtcgaaa tcatgcacag gattgatata  
38941 tttttcaggg taagccgcat gacctgttt tccgcgtatc aaaagcttac cattgataga  
39001 accacgacgc cctattttga tactatcgcc cttttttttt acacaagtag gttcagcaac  
39061 cacagcataa tcaggtagca tgtttttttc tttcatccat tctaaaacag cttttgttc  
39121 gtattttgcc tcgccttctt catcacttgt taaaataagg cttaatcttc ctcccttaaa  
39181 gttacttcc tttacagcat cgataaaagc agccacaccg cttttcatat cctgtgcacc  
39241 cttgcatag ataaaaacctt cttcttccaa aggctcaaaa ggatcatttt tccaaccctc  
39301 gcccgcagga acgacatcta catgcccacc aaaagccaaa tgctcgccct catcgttaaa  
39361 tttcttagta agcaagagat ttttaatccc ttctttttct ataaaaaaag cttcaaaatc  
39421 actgagttct aaggcaatga aatttaaagc accatcatct tccgggtgtaa tggactcaaa  
39481 ttttaaaagt tcgatcaata attcttttgc attcattttt ctatctata aaagttttat  
39541 ataataaatt tagagcgaaa tactctataa tcaaagctga aactatattg ataatacгаа  
39601 tcaccttgc actaaaaaga tagctgtatt ttgcgacaac aaaagctaaa gcagctatcc  
39661 aaaaaagaat agcaacaaca agtcctaata tcgtagaata agcgtgttga ttgcttaaaa  
39721 ctatgcctgt ggcactgagc caaaaaccta tcacataagg attagagcca tttaaaatga  
39781 taccctaac atagcttttt aaaagacttt ctttaaaatc tttatgctga tctaaatgca  
39841 aatcttcatt tttctttttt aacatcaaat aagccatata gcttaaaaaa caaaaacca  
39901 aatagccaa agcacgcata aaaatcacat tatccaagaa atttaaaagc caaattgca  
39961 ataaaagcaa atagagcaa tccacactaa atgcaccaa acccacagct atagaatttt  
40021 taaaagcctt taaagcatag gttaaaatca aaatatttat aggcccaaaa ggaacactta  
40081 ccccaaac caaaaataaa ccatttaaaa aagaatcaaa cattgccatc tttcataaaa  
40141 tttcaatat ctagtgcgat tttatctata gcactgatta tatcttcggt gtgattttta  
40201 tcaaaatatt gctccaaatt cacatctttt tcataaatat ttaaaatact tttttcacac  
40261 attgaagcat attgtcccac aggtaaaacc gcccgccttg tgccatgct aataaataat  
40321 gaagtttgat gaagcaaaga ataaagcgtg gcataagcag gagcctgctc ttcaaacatg  
40381 actatattgt gtcttaaat ttggctttta cattttgggc attgtttatc agcattttt

40441 tcatagccta tgttaaaaat ttcatacaaa gataaacaac gaagctcggg taaaaaacca  
40501 tgtaaagtga ccacatcttt acagcctgca cgctctagca aatcatcaac attttgcgta  
40561 aggataaaaa gatttttacc ccatttttct ttttaattgtg cgattttttc atgggcataa  
40621 tttggcttta cactttgaag ttggactctt cttgcgtcat aaaaatcaag tactttttta  
40681 ggattttttc taaagcctgt agcagagcaa acctccatta catcgtattc ttcccaaagt  
40741 ccatcattat ctctaaaagt ttttaagccca cttggagcag acaaaccgcg tccgcttagt  
40801 atcataatgt ttttcatttt aagccttgaa ttttttaaaa ttttaacataa gctattacaa  
40861 cctcaccacc ttagcaccaa agccgccttg attaataggt gcatcttgaa aactttttac  
40921 actcttatgt gtttttaaaa attcccttac tgcaaaagca agctttcctg tgcctatgcc  
40981 atgatagatt aaaacctcgt caaatcctgc tatcaaagca tctgaaataa atttatcaag  
41041 tctagcaata gcctcatcac tcctaagtcc atgcaaatcc aaactcacgc ttagattgct  
41101 aggctttggt aactgatac ttgtttttgc tactttttgc tgtatcgtc cgcttttttt  
41161 aagaagtfff aaaggcacgc gaagtttgat cccatcgctt tgcacatag catcgttttt  
41221 ggagatggct acgatttttc ctttgatttt ttcataatfff acaaaatcac ccacgcgcaa  
41281 ttcttcattt tgttccatac tcggtagaat gatttctttt ttaagctcat tggctttatt  
41341 taagcttctt tgtttttctt ttgtatcttt aagatgaatg gtttttttag cttcttctat  
41401 ggctttatgg aatttaaatt cttaaattct tagattatca cgaaattctt gctcattttt  
41461 ttctttttga tcttttaagg aaagtaaaat ttcattccact ttttgctctt ttttttctac  
41521 gctttcaagc ttggctttta gttctaattc taaattgata ttttttccca caagctcttc  
41581 taaatfffct ttatcctctc cataaagttt tttagcttcg ctgactaaat ttgaaggaat  
41641 ttgataacgc aaagctgttt caaaagcata agatfffctt atgggtgcctt ttaaaaactc  
41701 gtatfffgga cgcgaaagct cctcatcata caaggcggca ataagttcaa cttgatcatt  
41761 ttttgctaaa agcatggcaa ggcgtttatg gtgcgtggtg ataagatct taagcccact  
41821 atctatcaat cttgaaataa gcacactata caaacaagcc gcctcttcaa aatctgtccc  
41881 aagctctatc tcatcaatac ctaaaagcaa gcttttttta gaaaaaagct tagaaaaatg  
41941 aagcattctt cctgcaaagg ttgaaatatic atfffitaaca ttttgcggtat cttctataat  
42001 ggcatcaaat tccttaaaag agcctatfff actttggcta gattttatct gcataggcaa  
42061 aagatgtttg gctaaaaatg ccgcactcaa taaagacttt aaaagcatgg atfffccgcc  
42121 cgcattaaca cccgtgatga tcaaaacttg cttactaaaa tccaaactca cacttttagg  
42181 atfffitaaaa gcaggatggg caaaatcttt aagtatgatt ttattgctat tatcacataa  
42241 aacgaattca tagtctfff tcttagctaa caaaacccta gcactataat gatcgaaaag  
42301 atcaaaagca ttgttgataa atfffitaaaaa agctaaatff tttgctaaaa atgtagagaa  
42361 atfffitagca tattcatagt agatcccttc tttttgattt ttgattfff ctatgtcatt  
42421 ttgcaaattt tcaacactaa gtggaacgat gtaaaatcct cccccactac ttctgcctat  
42481 gattttagct tttatagcgt gattaaaacc cctcttaca agcaaagcct caaggctggt  
42541 tataagatgc acttgagtat cgattagata aggcatataa gactttgtgt agcaatattt  
42601 tttaaattca gctatgactg cttcattfff aagctttaga gctgtattga tatttatcaa  
42661 tctttcatct aagctttctt ttaactcacc cttttcatca aatfffcac aaagatttaa  
42721 aattccatta acaaattcga tcttttcaag ccatgaatff aaattgctgc ccaaattgag  
42781 cttttgatc ttttcaaat agcgaaaaat ttttacgaat tcaaaaatct catctaaatg  
42841 caaaaccctt tgtttgctta aatgcaccaa agccttatcc aaatttgaag gctcgggtaa  
42901 atttggaaat tcagcctcgc aaagctcatt gatgcgctta aaatgaaggt gagaatcccc  
42961 ctgtaaaaaa atfffctttat ctcttgcaaa gcaagattta aactcatgca aataagtatt  
43021 taaatcaagt tttaaaagta attcttcttt aatctcattc atcatttaac ctacaatctc  
43081 taatatcgat aatcaacgaa ttaaagcttt gattattatc ctttgatata aagcttctg  
43141 tcccaaattc gtaattaaaa taagcttttag agatatttat atctttacat aaaatatttt  
43201 tgttttgatt aaaagcaacg atgatatcat ttcttaaatg actfffittgt gaatttctta  
43261 cttcaaaaaa gacagccaaa aagataaaaa ctacaagcaa aacaccaaac aaagtttttag  
43321 catgcttgcc taatfffita cgcaaggaaa atgcgataag tgccaaaatg aggattatta  
43381 agacataaag taaaacttta ctcatfffgt tgccttaatt tattgctgat atctcccgca  
43441 ccaaaaccta taatcaaac ttcataaaaa acttgccctt tagaagcgac taaaaacttc  
43501 cctctctttt tgatatcttc tataaataaa gccttaggaa aaactgcttt taaatcaagc  
43561 tctatctfff cttctcctgc actatataca ggtaaaatca caagctcatc gactccttca  
43621 aaggctttag caaattcatt taaatffgca gccaaacgcg tataacgatg aggctcaaaa

43681 atagctacga tctttttata tcctgcta at tttgcgtatt ccttagcagc ttttaaagta  
43741 gcttttatct cggttgggtg atgtccataa tcatcgatta atgctaagtt ttcacagca  
43801 tgcaagatat caaagcgttt ttttaatacct tggatatttt ttaaattctt gcggatattt  
43861 tctatatttt cataatftaa tgccgctaaa atcgcataag ccgcatcaat agcaatatgc  
43921 tccccatac caaaaacact aatctttcca aaatftttca actcaaagct tghtaaaggc  
43981 ttgaaatttt ctatatgcat ggtaacattt ttgatattct tactcggata aagcttaatc  
44041 gcctcttggt tatatccttt caaatactca tcttctgcat taatcacgcg aattttagcc  
44101 aatcttaaaa aatcatcata agccttgtga agtctgcaaa cctcattacc ataatgatcc  
44161 aaatgctccg cttctgcatt ggtaacaata gctaaaaaag gatttgaatt taaaaaagag  
44221 ctgtcacttt catccgcttc aaaaatcaaa tttttacttt ctttatagat catatttgag  
44281 ccaaattctt ttaaaatcgc cccgataatc acagaagcgt ctttatcaa ggaagctaaa  
44341 atgcttgaag tgggtgcttt tccatgtgca cctgctactg caaaaacgca tttatcttct  
44401 aaaatcagtg gcaaagcttc ttttctgtaa agacatttga ttttaattc tttggcgtat  
44461 ttaaattcag gattttcttc tttgatagca gcagaataaa tcaccaaadc cttgcccaaa  
44521 atattgtctt tatgatgtgg aatttttacc tccactcctt ctttttcaag tcttttgggtg  
44581 attttgcttt ctttaagatc actcccgtt atgttaaaac ctttttcttt taaaaatctc  
44641 gctaaagcgg aaattcctat accgcctata ccgataaaat ggatattttg cattatctaa  
44701 gcctttgtat tghtaaagcct aaatttttagc acttttttac taaaataaaa atataaaaaa  
44761 gctcttaaaa ctttataaaa aagcattatt tttaaaaatt tatatattct ttattaactc  
44821 ccaaatcatt tcacttctaa aaaaatcaat ttttcatttc cttgtgtatt attttcattc  
44881 atcttttttc tcttttctga gttccattgc ttctttaagg aaagtggtag caatttcggt  
44941 ataaccgctt acatgtgaaa tgattttttc aaattcttca tcacttaagc ttaataaata  
45001 aggcattaca tgaggcttta taatggcatt aattctttta aaacaacctt ttgttggatc  
45061 atcgccatca ctgaataaac caggttcaag gtattctttg accttatctc caaagggtga  
45121 tatcactata tctcctggat ttgatattgga tggaaagtac gaactacgat aatatataaa  
45181 aaaagttcct aaaggaaaa ccaaatcatt tttaatataa tactcaatca caagtttttc  
45241 ttttgtgata taaattcttt taatatttgc catttgatag atatttttta caagtatata  
45301 taacccaaaa agaaatataa caaaaactat aaaccattta taatctattt ctttgctagg  
45361 attaaataat ctaggaaaaca aataaagaat aaaacataaa aatacaatat ttgctatcca  
45421 ataaagcaaa aacgaaggta tatccttttt tcttcccaa atgatttcat cttgggtgtc  
45481 ttgctctttg atttctgtgt tattgtttgc ttggctcatt tttatccctt aaataagttt  
45541 taatctcttg tatataaggg gagaaatcaa taataaaaaac attgtgatct atttcttgat  
45601 taaaaaataat ttttatattt gccctataaa gcttataaag atttactttt tcttctaaat  
45661 tcatagtctc taaagctttt tgtgtatatt tgggtcataa ttctttaaat gtatgattgt  
45721 tttcaaaact accaaaagaa tccacaccgc aaggaaaaat aaattctttt cttatgtgtt  
45781 ttatattttg tatttctatt ctttcaaaaa atcttatccc ataggcaatg tcataactca  
45841 ttghtaaaact tccataagga tagaaaattt ctgtatcaaa ccaccgcat tttaatatta  
45901 atccctgctc tghtaaaatt atggatttaa aattcaatgc cctatgtaat tcaaaaacat  
45961 aataaagact cccaaaggca aaaaaacat accacaaaga ttctttaagc aaaacaaacc  
46021 aacaaaacca acacacaaaa agacctaag caagataaat aatatattgc aaaatagcaa  
46081 ggaagtaaaa ttttctcttg cttttccaag gtaaagtaga attattcatt gcttaccctt  
46141 taaaagcttt agtagcaaaa ctttctgtaa tgcctaaggc ataaggagca acatctcaa  
46201 atactcctaa atccctttta tcactaggag tgctttgagt ttcttttagaa taaaactcta  
46261 aacttcata aatattttca ttcacttttt ttctcttttc tgagttccat tgcttcttta  
46321 aggaaagtgg tatcaatttc actagtagcg tttacatgga aaaagatttt ttcaaattct  
46381 tcatcactta agcttaataa ataaggcatt acatgagggt ttataatggc attaatfttt  
46441 tcacaacaac cttttgttgg atcatcgcca tcaactgaata aaccaggttc aaggatttct  
46501 ttggccttat ctccaaagggt atgtatcact atatgtcctg gagaagggtga atatgaaatt  
46561 tgacgataat atataaaaa agttcctaaa ggaaaaacca aatcattttt gatataatac  
46621 tcaatcacia gtttttcttt tgtgatataa atctttttaa ttttgccat tttatagatc  
46681 gctcgtgcaa atgcatatat gcctaaaaga aatghtaaaa aaactataaa cttttataa  
46741 tctatttctt tgctaggatt aaataatcta ggaaataaat aaagaaaaag acataaaagc  
46801 acaatatatg ttatccaaaa aagcaaaaac gaaggtatat gcttttttcc ttcccaaatg  
46861 atttcatctt ggggtgcttg ctctttgatt tctgtgttat tgtttatttc actcattttt

```

46921 atcctttact ctgccttaac ctctccacct ttaaccacaa gtccattaga gtctataatc
46981 acttctactc cacctgcttt aattataaca caatctttct tggtaacaat ttgagtatca
47041 cctacttgat ggaggatttg attgcctgct tttactccac aatctgtttg aaagtcaaaa
47101 gtagaatttt ctgattctaa cgaatattgc tcttctatct ttgtttgcat ggaattagac
47161 tttaaagatg tgttatcttg tatatgggcg gataaatttt gatggacatt aaggaaaaat
47221 tctttttcta ttgtttgggt taaagatttt tctattaata atttattttc tccctttaca
47281 ttccttatct catctttatg gataatagta ttttgatttg cacctatttc tatgtctttg
47341 ttttctccta caaactcatg agagttttta gctattctta ctttattatc tactcctaca
47401 tttaaagtat tgcttaatcc tactaatttt tcaaaaagcgg aaattcttat accacctaac
47461 cgataaaatg gatatttttc atttgcaaga ttaagctttt ccctatcact tgctaaaagc
47521 atagaggat tatttaaac tactcttata aatgccttct tgatactcta gctttaaact
47581 ttcataaatt cttctgttct cacaattatg aagaaatatt ttagtgatgg tttcatgatt
47641 atttccattt ttatctaaaa tcttaagatt attaagtgtt aattcaaaat ttccccttta
47701 tgcgataaaa tctcttcgct actatacctt tctagtttta aatagatttt tagcatcttt
47761 gaggctttat tttgatatta ttaaactctgc catgataatg taaagaaacc aaggaagctt
47821 tttcttgact atattccaac aagttatcgc caatatattg tgatatatac tttttatag
47881 aatcaaaggt tctttcc

```

//

LOCUS DMACINML\_13 41585 bp DNA linear 16-DEC-2020

DEFINITION Campylobacter species strain strain.

ACCESSION

VERSION

KEYWORDS .

SOURCE Campylobacter species

ORGANISM Campylobacter species

Unclassified.

COMMENT Annotated using prokka 1.13 from  
<https://github.com/tseemann/prokka>.

FEATURES

Location/Qualifiers

source

1..41585

/organism="Campylobacter species"

/mol\_type="genomic DNA"

/strain="strain"

gene

24..641

/locus\_tag="DMACINML\_01672"

CDS

24..641

/locus\_tag="DMACINML\_01672"

/inference="ab initio prediction:Prodigal:2.6"

/inference="similar to AA sequence:RefSeq:A0H52017.1"

/codon\_start=1

/transl\_table=11

/product="ankyrin domain protein"

/protein\_id="Prokka:DMACINML\_01672"

/translation="MMEYFESLGLKADEVHFGYNALSRVIDRDGKNKEVIEYFFKKGC

TFETYNEKSGDTPLEHWILCGEEVKYLEEALKLGANPNMRSIKTENKFSFSGAGETLL

HQAAESDEKPIGACVEVLIKYGADVNAANCRICDIEDGKIEYYPATPLDRANRARNV

SKNIKILKKAGAKTWEELVEEYNIDTSLERIEQIKIYEERRKDKK"

gene

678..2108

/locus\_tag="DMACINML\_01673"

CDS

678..2108

/locus\_tag="DMACINML\_01673"

/inference="ab initio prediction:Prodigal:2.6"

/inference="similar to AA sequence:RefSeq:A0H52016.1"

/codon\_start=1

```

/transl_table=11
/product="restriction endonuclease fold toxin 7 domain
protein"
/protein_id="Prokka:DMACINML_01673"
/translation="MEFNDINFKIKEFESVDIISDYSLVFYLPKEEHMIGEKDQDGKI
RINKSNSLKYIEKINEEKEKEIEKLLQSNEKINEEFDKLDKGTLPPTKEYKRKNYEYD
VFYDVYTSKDNINKCIKKIPIKNGVGTLSNFLRRFYENSVKGYNCKWCLIPRLIRN
KGESSFDVPVILNSSFVISELSNIKQKTLTFQRTIANVEHPSHFALQSPKEFKSMLEN
KQSFASYGGKEKQIEDLLKTAQHKLLETIKKANGISEETKEALQEKQEEVVRKCEKLEN
SKKKISPKLIGDTGEYVASLLFGKRSTRYLSNQRKLDANFNIIYSFNHTIPDFLVSING
IPSLVEVKNVQVQSLTEQISFELKLAREYELDYIFVCNHYHTLTENVAGSALTREEHE
ELARDDKGVGEFNEETKRLKAKVAEVLNEKDDLNEEFIKSVSDGNKYLKEREKFY
KVASDVYIKNPIYKMGFEKTSKSSC"
gene 2077..2610
CDS  /locus_tag="DMACINML_01674"
2077..2610
/locus_tag="DMACINML_01674"
/inference="ab initio prediction:Prodigal:2.6"
/inference="similar to AA sequence:RefSeq:CKG88360.1"
/codon_start=1
/transl_table=11
/product="hypothetical protein"
/protein_id="Prokka:DMACINML_01674"
/translation="MRKKLQNQVVDINIVKDFLKDFAKRLGIDEKVLVPIGYNPQRGD
SGTYDYTVNTLDLNPKASYVDFIDTIIHEFRHFYIYCIKNNKNSIEKLLYLDMVQFY
IPWNFYKIFNSYDKKCLIIDNEDETKKCLKNRTYYGSWKFNLPTDLLPSPLYLQPS
ELDSRIMAYYFRKEIKL"
gene 2610..3875
CDS  /locus_tag="DMACINML_01675"
2610..3875
/locus_tag="DMACINML_01675"
/inference="ab initio prediction:Prodigal:2.6"
/inference="similar to AA sequence:RefSeq:CKG88389.1"
/codon_start=1
/transl_table=11
/product="hypothetical protein"
/protein_id="Prokka:DMACINML_01675"
/translation="MTPPSLPDVEKHEDFLQTRKEPYAIYLAINITNIKSYNNICPSEK
YFWKFNNMNELDKWYNPKFGIYLGKIVFDKKNKLIPIKYIAAKFENLEEEVKKIKNPL
WLANKPNPYIEPKFYDGMSSGGYFESPNNLEYQCKIEKDTQVLSQEIQIISYVKELYSK
NTIIKKNYIDAINKDYGIKPFVFSDEIYDELGEVGILTKEQANNFKDKSYIKKDPILL
AMLDYLAQNKKDEDYLITFDDEYFYTYLVWSLKDFLLELSYGLFQDETELLFNPAAY
MDDTKIYYQNLNEEINKRYEKILLNMGFEGENGYFKDYDYDYGFGNNGIFEFISIYDYFA
YDEIGVQPIQQSPYVPPKSPFDSPNFVYSDGNHGDALVPSALGKYFELLYQKEIY
IELLRPYPSIKDLPEGWDNKMLEKANLK"
gene 4566..4772
CDS  /locus_tag="DMACINML_01676"
4566..4772
/locus_tag="DMACINML_01676"
/inference="ab initio prediction:Prodigal:2.6"
/codon_start=1
/transl_table=11
/product="hypothetical protein"
/protein_id="Prokka:DMACINML_01676"

```

```

/translation="MDALDRYVFYSEKAYINEKIIFDKFSRICDPSENYLVGCNIGAI
QDAYEIRPNERDPYVETLIGRSL"
gene 4785..5201
/locus_tag="DMACINML_01677"
CDS 4785..5201
/locus_tag="DMACINML_01677"
/inference="ab initio prediction:Prodigal:2.6"
/codon_start=1
/transl_table=11
/product="hypothetical protein"
/protein_id="Prokka:DMACINML_01677"
/translation="MKTIKIPLKDYISNIREDKTIYLGQLQSDMSIKGLDEEYLKKEYN
LKRNFKFETSIYLGKIIIEKNIIIFKAFNVDENCFEGLKELFFKNNPYTIIDNLELKK
YFLKLYKDNIEFLTSYINEINQVHGKLYHVLHML"
gene 5929..6801
/locus_tag="DMACINML_01678"
CDS 5929..6801
/locus_tag="DMACINML_01678"
/EC_number="3.6.1.-"
/inference="ab initio prediction:Prodigal:2.6"
/inference="similar to AA sequence:RefSeq:ABS44566.1"
/codon_start=1
/transl_table=11
/product="F-box only protein 18"
/protein_id="Prokka:DMACINML_01678"
/translation="MDEAQDINACVIDIVLNQKQAKKVFIGDTFQSIYKFRGAVNSLE
ILASMPKSHTLYLTQSFRCQNIAFIANSYLKILNARRDFKGTKSSNENVKNEAKAI
VCRTNAKLFDAVENLDKLLFVGGINSYSFDELLDIQNLLFKKHHEYIKNQFIVKPAD
LKELLEYINETKEVDLQKIFVLFKYVHGDIKLIKAIKSSVKKQEADLILSTGHK
SKGLEWNNVEIIDDFLNIKQELEERDQITIAKEELNLLYVAITRAKNSLSISKDYLL
KEFIQENLERIIIE"
gene 6798..7007
/locus_tag="DMACINML_01679"
CDS 6798..7007
/locus_tag="DMACINML_01679"
/inference="ab initio prediction:Prodigal:2.6"
/inference="similar to AA sequence:RefSeq:AVL47291.1"
/codon_start=1
/transl_table=11
/product="helix-turn-helix domain-containing protein"
/protein_id="Prokka:DMACINML_01679"
/translation="MKIKKLQKDGSKFEQVYYSVQEVVQMHVTHVTVRLWISRGILK
GMKLGKGFYMSKEAIIIEFQKNDGLL"
gene 7025..7174
/locus_tag="DMACINML_01680"
CDS 7025..7174
/locus_tag="DMACINML_01680"
/inference="ab initio prediction:Prodigal:2.6"
/inference="similar to AA sequence:RefSeq:ARJ53387.1"
/codon_start=1
/transl_table=11
/product="DNA-binding protein"
/protein_id="Prokka:DMACINML_01680"
/translation="MSSIAKDSHVKMRDFLFNKYNKMTFSRKECAKILGISLQTLDRLL

```

TKDKK"

gene 7844..8764  
/locus\_tag="DMACINML\_01681"

CDS 7844..8764  
/locus\_tag="DMACINML\_01681"  
/inference="ab initio prediction:Prodigal:2.6"  
/inference="similar to AA sequence:RefSeq:ADC28003.1"  
/note="conserved hypothetical protein"  
/codon\_start=1  
/transl\_table=11  
/product="hypothetical protein"  
/protein\_id="Prokka:DMACINML\_01681"  
/translation="MEAKGIAIFPTNVAFSKKTNAFFTELEDQFLKEGVGNKSAIKLD  
FEYYILYCQFLQIDKESLFFGRNYELVFCFLLYRALLNKNNTQKIVAKIINVIRCQD  
RLPEKVHYREKIICMDNQHRDLSQTLSSCIAEFYNSIDLNTFRKNIGFENRKKIAIE  
MLNRASEHYGFFGLSRGGITYKEEKISCVPIQALDEFHHGMSHLCAVFLKEDGRYTNL  
ERAIPHFKRGMMEVYKTIIRD FMILNKDALGVKQEALKIRELEYQTIGPKPTVTKNPT  
TNLTNKKEEKVIPGYKELCEKIVSQIKNAK"

gene complement(8864..9892)  
/gene="flgS"

CDS complement(8864..9892)  
/gene="flgS"  
/locus\_tag="DMACINML\_01682"  
/inference="ab initio prediction:Prodigal:2.6"  
/inference="similar to AA sequence:RefSeq:CAL34921.1"  
/codon\_start=1  
/transl\_table=11  
/product="signal transduction histidine kinase"  
/protein\_id="Prokka:DMACINML\_01682"  
/translation="MNENILKSLDSSEKETLQKGLQSLIEQTYIVENEYKILNENYNS  
LRAMVDEIIEVLPSALWILDKEKNIILQNQEALKKPKLLDIISLEKNRDELEFENRFY  
AVKIIAHNEKTIVSATDISDEKRNERLASMGVAHAHLAHEIRNPIGSISLLASTLFSR  
SELKNKHIVLEIQKAIARVERIVNSTLLFTKGVHINASEFNLELTEECESAINSYNY  
SSQIDFEINFLDKIYGDKALLSLVLQNLIIYNAIDAIEESEECENPKIKIQASCDEQNL  
YIRVYDNGCEIKDENLVFEAFKTTKLGNGLGLSLSKEIINAHKGELKFEIWPKNFYF  
VLPLHYNS"

gene complement(9889..10710)  
/locus\_tag="DMACINML\_01683"

CDS complement(9889..10710)  
/locus\_tag="DMACINML\_01683"  
/inference="ab initio prediction:Prodigal:2.6"  
/inference="similar to AA sequence:RefSeq:CAL34920.1"  
/note="conserved hypothetical protein Cj0792"  
/codon\_start=1  
/transl\_table=11  
/product="hypothetical protein"  
/protein\_id="Prokka:DMACINML\_01683"  
/translation="MAKIFDFYSVFEGFERLDSLNFEEVDVFNIEYLLLNKLYLDIKDC  
FKLDETASYALSLLAKNNRKRFSINRKIQHFALSTLKYLLRVGIKLEHSKEAKRVR  
DKRQKLKKELRSYVIQDKIIFANQFTRFFFYFLKPNEKLILQNRYYEVLTLIKEKFEF  
YQSFCEQLSRELLEKKFQVSGVQSYWDKNLELDLYYKDDKISFIGEVKFKNKKICRN  
ILNLELKAJSLKLEPNYIIISKNGFSKEFYKICKQDLLLDDLNDFKILLEENK"

gene 10814..12082



CDS /locus\_tag="DMACINML\_01684"  
 10814..12082  
 /locus\_tag="DMACINML\_01684"  
 /inference="ab initio prediction:Prodigal:2.6"  
 /inference="similar to AA sequence:RefSeq:CAL34919.1"  
 /codon\_start=1  
 /transl\_table=11  
 /product="putative aminotransferase"  
 /protein\_id="Prokka:DMACINML\_01684"  
 /translation="MQISDLKKEIILKKGTLHFDFITASALALKCVEKEIAKILPSYAN  
 THSDSSLNSFKTQQIYEQARKDIKTSLNLSDEFALIACGSGSSSAIKKFQELLGIYIP  
 PLVKERYFEKVDKSTLPLVIVGPYEHHSNELSFREGLCECIRIPLDKKGNIDFEILEK  
 VLKENQHRKIIASFSLASNVTGILSDYKRISKLVKFKGIVAFDASSFIPYKNIACKY  
 YDALFISSHKLIGGIGGSGLLAIKKELCGNKPSFAAGGTVDVVSRTSQCYLCNEEALE  
 EGGTPGILQLIRASLAFKIKDEIGIEEIEKKEEILKEYFFEKLKTIPHLILYANNIKT  
 RLPFAFNINISPFDLAYELSKKYHIETRAGCACAGPYGHDLGLKDNHEELKTKPGW  
 LRISLHYTHEKEDIDYFFEALQKSIKLF"

gene complement(12086..12162)  
 /locus\_tag="DMACINML\_01685"

tRNA complement(12086..12162)  
 /locus\_tag="DMACINML\_01685"  
 /product="tRNA-Asp"  
 /inference="COORDINATES: profile:Aragorn:1.2"  
 /note="tRNA-Asp(gtc)"

gene complement(12184..12259)  
 /locus\_tag="DMACINML\_01686"

tRNA complement(12184..12259)  
 /locus\_tag="DMACINML\_01686"  
 /product="tRNA-Val"  
 /inference="COORDINATES: profile:Aragorn:1.2"  
 /note="tRNA-Val(tac)"

gene complement(12268..12343)  
 /locus\_tag="DMACINML\_01687"

tRNA complement(12268..12343)  
 /locus\_tag="DMACINML\_01687"  
 /product="tRNA-Glu"  
 /inference="COORDINATES: profile:Aragorn:1.2"  
 /note="tRNA-Glu(ctc)"

gene complement(12357..12432)  
 /locus\_tag="DMACINML\_01688"

tRNA complement(12357..12432)  
 /locus\_tag="DMACINML\_01688"  
 /product="tRNA-Lys"  
 /inference="COORDINATES: profile:Aragorn:1.2"  
 /note="tRNA-Lys(ttt)"

gene complement(12436..12512)  
 /locus\_tag="DMACINML\_01689"

tRNA complement(12436..12512)  
 /locus\_tag="DMACINML\_01689"  
 /product="tRNA-Asp"  
 /inference="COORDINATES: profile:Aragorn:1.2"  
 /note="tRNA-Asp(gtc)"

gene complement(12534..12609)  
 /locus\_tag="DMACINML\_01690"

tRNA complement(12534..12609)  
/locus\_tag="DMACINML\_01690"  
/product="tRNA-Val"  
/inference="COORDINATES: profile:Aragorn:1.2"  
/note="tRNA-Val(tac)"

gene complement(12622..12697)  
/locus\_tag="DMACINML\_01691"

tRNA complement(12622..12697)  
/locus\_tag="DMACINML\_01691"  
/product="tRNA-Lys"  
/inference="COORDINATES: profile:Aragorn:1.2"  
/note="tRNA-Lys(ttt)"

gene complement(12759..13544)  
/gene="glnP"  
/locus\_tag="DMACINML\_01692"

CDS complement(12759..13544)  
/gene="glnP"  
/locus\_tag="DMACINML\_01692"  
/inference="ab initio prediction:Prodigal:2.6"  
/inference="similar to AA sequence:RefSeq:CAL35060.1"  
/codon\_start=1  
/transl\_table=11  
/product="putative glutamine transport system permease"  
/protein\_id="Prokka:DMACINML\_01692"  
/translation="MSLFIQKCKNFKIQKPLSKKVIFFNALILIFILSLFFYFSFSVS  
AYHFDFTSLLEYKNKIIYGFFQTLVSFFALMCSIILGVVICFFSLSKIIILRFFATL  
YVELIRGTPLLVQVLLVFYIIANSLGFDDRYIVGIFILSMFSAAYLSEIFRAGVLSVP  
IIQIESARALGLSERQIFLYIIFPQAIKNILAPISGQLANLIKDSSLLSVIALNELTQ  
SIQEVNSYIFATLEGYIVLAFAYLILTLPIGIFSRYLERYKQK"

gene 13669..14046  
/locus\_tag="DMACINML\_01693"

CDS 13669..14046  
/locus\_tag="DMACINML\_01693"  
/inference="ab initio prediction:Prodigal:2.6"  
/inference="similar to AA sequence:RefSeq:CAL35059.1"  
/note="hypothetical protein Cj0939c"  
/codon\_start=1  
/transl\_table=11  
/product="hypothetical protein"  
/protein\_id="Prokka:DMACINML\_01693"  
/translation="MLILGHYLLTQNSNFCFINESKCLKKQDISCFLYNEEIIQNAKN  
ENLDFAVLIQDKNEIFLSNALGAKFLLFD DENLARFASEVAEFYLFDSKILLLVENLH  
KLEKAYELRLDGVILKSLIQDYH"

gene complement(14054..15184)  
/gene="creD"  
/locus\_tag="DMACINML\_01694"

CDS complement(14054..15184)  
/gene="creD"  
/locus\_tag="DMACINML\_01694"  
/inference="ab initio prediction:Prodigal:2.6"  
/inference="similar to AA sequence:UniProtKB:P08369"  
/codon\_start=1  
/transl\_table=11  
/product="Inner membrane protein CreD"

```

/protein_id="Prokka:DMACINML_01694"
/translation="MNKKMEQKFDENKFMQEYARNQRLKSLTLKGVLFIIISIALLIP
LLMLKTLVEDRKYS AQNVVSLMGKAWGSDEFYTPSLNEKILPNKLELWVDLKYQERTK
GIYKIPLYTAFVDFNASFNINLSNFDENSIQFFK GKLRNLQFNVLEDILWVSGTLQL
KGYGSDANLQAKENIIHINSNATNPSFEYALPNDYSVDKKGFSAFYEFENSILDDKV
EKKRLSVEFYQGVDDYRLIDRMIKYGYLFIIILFLVFLCELASKKNVILLQYAILGA
SLIVFYLMLLSFSERIGFNFAYL FSSLAIIPLSLYTL SIMGQKRFAIVMATILFILY
LCLFIMLKQDEYALLIGTFIAMFGIYAAMYFTRNLNKDYHQG"
gene complement(15177..16382)
/locus_tag="DMACINML_01695"
CDS complement(15177..16382)
/locus_tag="DMACINML_01695"
/inference="ab initio prediction:Prodigal:2.6"
/inference="similar to AA sequence:RefSeq:CAL35061.1"
/codon_start=1
/transl_table=11
/product="putative permease"
/protein_id="Prokka:DMACINML_01695"
/translation="MKKSVLKYLLFKYLRFDKEQPFINLSMLLAFLGVCVGLCVLLVA
MAIMNGFDKEFEKRFVFNYPITIVPKFYSPMEDLVKELKREFPHLLFSPYISTQVV
AKADNRFEGGVLFGVNFNDEIKINEVAKALKDENLSGFDILVGSVLADELNLHKNDK
LSLIFSNLSPSGFSLVPQAKRFDVKARFTSGLIFYDKAYMYTDVNALRKVLGISNQQS
YDGVHVYSENAFKDVEKLKSYLKS DYAVVGWWEQNQNFFSALKLEKRALFIVLMLIIL
VASLNIVSSLLMIVMNRRAEIALLLALGASKLEIKKSFFALGMLIGGGGMIIGIILAF
FALWLLGNFDIITLPADVGT SKLPLDLSVMDFSLTLV GALIIIALSSYYPAKKATQI
NVLDTLRNE"
gene complement(16379..18967)
/gene="secA"
/locus_tag="DMACINML_01696"
CDS complement(16379..18967)
/gene="secA"
/locus_tag="DMACINML_01696"
/inference="ab initio prediction:Prodigal:2.6"
/inference="similar to AA sequence:RefSeq:CAL35062.1"
/codon_start=1
/transl_table=11
/product="preprotein translocase SecA subunit"
/protein_id="Prokka:DMACINML_01696"
/translation="MFLNLT KAVFGTKNDREVKKYLKRVAQINALESKYQNLSDDELK
AEFGKFKEQILSGEKKENDILNDVFAIVREV GKRTLNMRRHFDVQLIGGMVLHEGKIAE
MKTGEGKTLVATLPVVLNAMNGKGVHVVT VNDYLAKRDAEQMSAIYNFLGFSVGVILS
SQNSDLEHKKAYDCDITYGTNNEFGFDYLRDNMFKSKAEKVQREHHFVIVDEVDSILI
DEARTPLIISGPTNRTL DGYIKANEVAKQMQRGEAVLPPAKPEGDFIVDEKRNILIT
EAGIAKAEKLF GVENLYSLDNAILAHQLDQALKAHNLFEKDVHYVLRNNEVIIVDEFT
GRLSEGRRFSEGLHQALEAKENVKIQEESQTLADITFQNYFRMYEKL AGMTGTAQTEA
TEFSQIYSLDVSIPTNIPIKRQDKDDL IYKTQNEKFKAVIEEVKKANAKGQPVLVGT
ASIERSEVFHNMLVKEKIPHHVLNAKNHEQEALIIQDAGKKGAVTIATNMAGRVDIK
IDDEIRALGGLYIIGTERHESRRIDNQLRGRAGRQGD PGISRFYLSLEDNLLRIFGGD
RIKNIMDRLGIQEGEHIESRIVTRAVENAQKKVESLHFESRKHLLEYDDVANEQRKTI
YRYRNELLDEEYDIKTKISQNI AEYSAYIMNDFMIEESGADLNFENLKAKILDECSVE
LKQSDFENLSLIEMQEKLSEVLEKSYDEKMSKLD SKQLHHIERILYLQVLDNAWREHL
YQMDILKTGIGLRGYNQKDPLVEYK KESYNLFLELVNRIKFDSIKLLFSVKFSQEEAQ
NLEEKANQENEALFEKSVEMGASEDNLGEAEFKK VPRNAPPCPGSGKFKKECHGKSGP
KQGILA"

```

gene 19076..19585  
/gene="lolA"  
/locus\_tag="DMACINML\_01697"

CDS 19076..19585  
/gene="lolA"  
/locus\_tag="DMACINML\_01697"  
/inference="ab initio prediction:Prodigal:2.6"  
/inference="similar to AA sequence:RefSeq:CAL35063.1"  
/codon\_start=1  
/transl\_table=11  
/product="putative outer-membrane lipoprotein carrier protein precursor"  
/protein\_id="Prokka:DMACINML\_01697"  
/translation="MKKIFCLFFFCLSHILAIIDLNFNTYSSNFTQSVKSKDSTLSYSG  
HFILSQEQAYWSYDTPSKKEIYINKNQIVLVEHDLEQVVF SRLDNIPNLNEIFKKAKH  
LNDNQLIAKYENINYTITLKDNEIQSIAYKDEFENDILITLNHQIKNPAVNPEVFKAK  
FPNHYDMIR"

sig\_peptide 19076..19129  
/gene="lolA"  
/locus\_tag="DMACINML\_01697"  
/inference="ab initio prediction:SignalP:4.1"  
/note="predicted cleavage at residue 18"

gene complement(19589..20284)  
/locus\_tag="DMACINML\_01698"

CDS complement(19589..20284)  
/locus\_tag="DMACINML\_01698"  
/inference="ab initio prediction:Prodigal:2.6"  
/inference="similar to AA sequence:RefSeq:CAL35064.1"  
/codon\_start=1  
/transl\_table=11  
/product="putative periplasmic protein"  
/protein\_id="Prokka:DMACINML\_01698"  
/translation="MKKIFLLTFLSLSLNAQSLELDKIRTDLYSKSGANVLKKVEISL  
EFEGEKLEKENENKLTDAVNTVISGFFYEDIFTELGKNNFKKTLEKFKDKYKIKINEI  
YILSLSGVEKFDLEEFKRFLASTEAKEKNVGSEVKKALDNLEIPQTPAVPNISDIETP  
QIDQLFQDDNTQNQYDNGEIDINTLNIPKITDIEEKIKRDLIANPPQIFKENNNSKEK  
GFELNLDNSTIP"

gene complement(20295..21638)  
/locus\_tag="DMACINML\_01699"

CDS complement(20295..21638)  
/locus\_tag="DMACINML\_01699"  
/inference="ab initio prediction:Prodigal:2.6"  
/inference="similar to AA sequence:RefSeq:CAL35065.1"  
/codon\_start=1  
/transl\_table=11  
/product="putative helicase"  
/protein\_id="Prokka:DMACINML\_01699"  
/translation="MLDKLEKFLAYDNVFLSGGAGVGKSFLTNELIRSYKRQGKIVVA  
LGSSALSAFNIAGVTLHSFFCLGYCQDMTTLVDFDRNQQRERVIKLESKKIDLII  
IDEISMVSADIFEMIGFRLKNSQFDGKILVVGDFQLPPVIKEKKENLFANSTYAFSS  
FFWKELKFKNIKLTQPKRTHNLEFYGNLSLIRQGFLLDKILNFFENLCINTKELEELD  
DDYTLCSINKKVNTVNDRLNKLESPLVCFKAEIRKECKDIDEHKKIQTWIKSLNILD  
ELKIKIGARVIFCVNNWDKGYNGEQGIIESITYEEDKTYIGIMKSNGVKIMLEPYVF  
FMEELEQNNNEMFINVLASVSQFPPIKLAYAITIHKSQGMSIEKLVCDIDHIFENGQLY"

gene VALSRAINPTTLKIYFTKRINFKAYFASILKFDTSVREFYQNNDFLDLELENNII"  
 21687..23051  
 /locus\_tag="DMACINML\_01700"  
 CDS 21687..23051  
 /locus\_tag="DMACINML\_01700"  
 /inference="ab initio prediction:Prodigal:2.6"  
 /inference="similar to AA sequence:RefSeq:CAL35066.1"  
 /codon\_start=1  
 /transl\_table=11  
 /product="putative lipoprotein"  
 /protein\_id="Prokka:DMACINML\_01700"  
 /translation="MKIWLYPCLATLFFTACSLKESGLNSNPPQISISNFYQQDSHYA  
 KLEFDQNISVLSKMNQINIFDSQKYKQHFFSPWHSSFKALENQNLFWFSLYTNPKNI  
 YYFFNKQVIPLSWFEKTIDNANTKELGKLNKKALIIQNTLVKNIPTQRVILKNPYLES  
 EGIPFDYASDSILNAGTPILVSHFSKDKRYAFVLSEAGVGFIESKDLEFFSDSRAQIY  
 EKLNFLTPLKEKLAILDEDGNFFESRIGALYPYKEDKNFYGKIGPKKYKISKDNA  
 SKFPLNFNDENLKNQISEVLNLPYGGWGGYNFERDCSLLTRDVFSAFGLYLPRNSAAQK  
 NSFTHFDISTLDNSQKKDFLDRFGKAYLNLLYLPGHIMLYAGKISDKNVAVHNIWGLR  
 KDETQRLLISSSVITSLEIGKDEISKENLLLSRLKEVSFIYLNKEEKEQITNYLEKLNKAD"  
 gene complement(23088..23960)  
 /locus\_tag="DMACINML\_01701"  
 CDS complement(23088..23960)  
 /locus\_tag="DMACINML\_01701"  
 /inference="ab initio prediction:Prodigal:2.6"  
 /inference="similar to AA sequence:RefSeq:CAL35067.1"  
 /codon\_start=1  
 /transl\_table=11  
 /product="putative carbon-nitrogen hydrolase"  
 /protein\_id="Prokka:DMACINML\_01701"  
 /translation="MKIALIQQKFHSTKEKTIEKTCEFIEQAAKQGAELVCLGELHQS  
 EYFCQSENVEFFDLANDYEKDVQFWSSIAKKHGVVLLTSLFEKRSAGLYHNTAVVFEK  
 DGSIAGKYRKMHIPDDPCFYEFYFTPGDLGFEPINTSLGKLGVLVCWDQWYPEAARL  
 MALKGAQILYPTAIGWFDKDEKEEKQRQLGAWLGVQKGHAIANGLYTVAVNRVGFEE  
 DKSGVEEGIRFWGNSFVFGPQGEEICILDSENECVKLVLDIDLERSENVRRWVWVFLRDR  
 RIEYFSDLSKRFID"  
 gene complement(23957..24844)  
 /locus\_tag="DMACINML\_01702"  
 CDS complement(23957..24844)  
 /locus\_tag="DMACINML\_01702"  
 /inference="ab initio prediction:Prodigal:2.6"  
 /inference="similar to AA sequence:RefSeq:CAL35068.1"  
 /codon\_start=1  
 /transl\_table=11  
 /product="putative cation efflux family protein"  
 /protein\_id="Prokka:DMACINML\_01702"  
 /translation="MNLQKKATLIASLCAIVLALIKFVVGLTSGSVAVLSSAIDSLMD  
 FAISAFNFLALKKSSQKANENYNGFSGKIEALMGLLEGAFIVSVGIFIFYESILKIYY  
 KEEIINLNASIYVMIFALILTFLLVFLNYYVVKTKSLIIESDALHYKTDCLTNACTL  
 AALVLIYFTNLHIIDAIIFGIVVSLYAFSAFKIISKALAFMLDEALPKEQVSQICALI  
 SSNPEVVSYHELKTRKTPNCNYLSVHLVFCPIISLLSAHKVSDEIENGVREMFNGEKW  
 DIQIHLDPYDDEEQERQRQ"  
 gene complement(24841..25818)  
 /locus\_tag="DMACINML\_01703"

CDS complement(24841..25818)  
 /locus\_tag="DMACINML\_01703"  
 /inference="ab initio prediction:Prodigal:2.6"  
 /inference="similar to AA sequence:RefSeq:CAL35069.1"  
 /codon\_start=1  
 /transl\_table=11  
 /product="putative peptidyl-arginine deiminase family protein"  
 /protein\_id="Prokka:DMACINML\_01703"  
 /translation="MIKSIPEWSEQEYLMLSLPHEKSDWKPYLGEI IQAYKEFVKATS  
 EFQKVLLIAPNKSD FAPFENMTNVEFFICDTNDTWIRDFGAIDILEDNHLKALDFTFN  
 AWGNKFQSELDNEVNSKLFKEKFNEKLT KIDFILEGGSIDFNGEGVMLTSSNCLLNEN  
 RNSHLDKSQIEARLKEIFGLKQIIWLENGFIKGD DTDHHDITLARFIDKNTIAYSICE  
 DEEDEHYIPLQKMKKELEATGFDLVELPLPKPLYEGRR LGATYANFV FVNDALIMPF  
 YKDENEI IKQRLAKALPKRKIIIGVDARVFLRQNGSLHCSCQNRFKGLR"

gene complement(25915..26352)  
 /locus\_tag="DMACINML\_01704"

CDS complement(25915..26352)  
 /locus\_tag="DMACINML\_01704"  
 /inference="ab initio prediction:Prodigal:2.6"  
 /inference="similar to AA sequence:RefSeq:CAL35070.1"  
 /codon\_start=1  
 /transl\_table=11  
 /product="putative lipoprotein"  
 /protein\_id="Prokka:DMACINML\_01704"  
 /translation="MKKTLQIVLAAFFAGCASTSVNSKSTSKISNEFMQNQLFEIDK  
 IVVNGKTFDPKNAEENPNISFENNKFYGYAGCNRF FGSYQSNENTLEIQGDRVASTQM  
 LCHPLEVMEFENAFLSNFKGSFTISNKNGLLILNNGEMEIFFK"

sig\_peptide complement(26278..26352)  
 /locus\_tag="DMACINML\_01704"  
 /inference="ab initio prediction:SignalP:4.1"  
 /note="predicted cleavage at residue 25"

gene complement(26362..27954)  
 /locus\_tag="DMACINML\_01705"

CDS complement(26362..27954)  
 /locus\_tag="DMACINML\_01705"  
 /inference="ab initio prediction:Prodigal:2.6"  
 /inference="similar to AA sequence:RefSeq:AII24663.1"  
 /note="MCP-domain signal transduction protein (DUF3365 domain)"  
 /codon\_start=1  
 /transl\_table=11  
 /product="hypothetical protein"  
 /protein\_id="Prokka:DMACINML\_01705"  
 /translation="MFRTIGFKVSA AIFVVLLLLSFIAMQF ILNLDFKNTADKMSKSNL  
 NTVSSSVFQ TMRMAMNLGDPEKIQEAI EDAKTIEGISDIKIYPSKETIELFEIKNPKI  
 SQDKLIIDQFTQPNLISLEQLDNINHLRLIRPLIADESCIACHANANLGSVLGVMDV  
 YHSLNIEKDIAKTSRSYIVIFTIALIFTLIVVLFVLKIVVGNPIMELLSHAKELAQG  
 SGNLRARIRVKGRDEIAKACEYINQFIEKTQKT VSSASLNSKNVEKQSILLNSNAIEL  
 NEISTSSHQKIDSSFKLGV DIGTDLDEISNLSSDANKANDKSYQLLDQMIHSLLEIDK  
 KVSDLVQENDLALKIENMVKYAQNIQKATQMMSEIADKTNLLSLNAGIESARAGSYG  
 KGFSVIAEDIRTLANNSEEF LHNVELI IKELLESIQEVAKELKENSHSIFSLNENTHL  
 LANSANEVKLCNQDSKNLVTQCTQR IKISQENIQNLLMHMRENVEASGKNEEISKILL  
 QVADELKIVCHNLESELSQFQI"

gene complement(28051..29583)  
/gene="purH"

CDS complement(28051..29583)  
/gene="purH"  
/locus\_tag="DMACINML\_01706"  
/EC\_number="2.1.2.3"  
/inference="ab initio prediction:Prodigal:2.6"  
/inference="similar to AA sequence:RefSeq:CAL35073.1"  
/codon\_start=1  
/transl\_table=11  
/product="phosphoribosylaminoimidazolecarboxamide  
formyltransferase / IMP cyclohydrolase"  
/protein\_id="Prokka:DMACINML\_01706"  
/translation="MRALLSVSDKEGIVEFGKELENLGFELLSTGGTFKLLKENGVKV  
VEVSEFTKSPELFEGRVKTLHPKIHGGILHKRSDENHIKQAKENGILGIDLVCVNLYP  
FKKTTIMTDDFDEIIEIDIGGPAMIRSAKKNYKDVMLCDPLDYEKTI EVLKKGEND  
EKFRLNLMIKAYEHTANYDSYIANYMNERFNNGFGASKFIVGQKVFDTKYGENPHQKG  
ALYEFDAFFSTNFKALKGEASFNNLTDINAALNLASSFDKAPAIIVKHGPNCGFAIK  
ENLVQSYTHALKCDSISAYGGVVAINGTLDEALANKINEIYVEVIAANVDEKALAVF  
EGKKRIKIFTQESPYLIRSFDSYDFKHIDGGFVYQNSDEVEDELKNAKLVSQREASQ  
AEIQDLEIAMKVAALTKSNVVYVKNAMVAIGMGMTSRIDAAKAAIAKAQEMGLDLQ  
GCVLASEAFFPRDSIDEASKVGVKAIVEPGGSIRDDEVIQAANEYGIALYFTGVRHF  
LH"

gene complement(29586..30518)  
/locus\_tag="DMACINML\_01707"

CDS complement(29586..30518)  
/locus\_tag="DMACINML\_01707"  
/inference="ab initio prediction:Prodigal:2.6"  
/codon\_start=1  
/transl\_table=11  
/product="hypothetical protein"  
/protein\_id="Prokka:DMACINML\_01707"  
/translation="MKAFLYVTLGIIIVTMRICVFVYCIAGGLIIAQYFVKVGLGE  
ILYFLGFDKKSVAAILVFFISAWLIALIGNVVIFITEAILSRLIDNIWKILGYSLAT  
FMFAPYYFTKAFIYYPIKCSIIIVFKYLSWNTKIFLSLIWVTLTILFIVFFYFDVINL  
IAHQFSGYYKEITNIKRINYNYIFNIFGICIAINIVSLGMIFLFKKTESLLYMRAYKI  
LNQNKGYEKKQKDFFKQEQLDNFQQNELDILLKIFDLTQETLNKENLKKHYKELARQ  
LHPDLVPPHKKKEAHNQFVELQKNYDKLQKYLKE"

gene complement(30529..31299)  
/locus\_tag="DMACINML\_01708"

CDS complement(30529..31299)  
/locus\_tag="DMACINML\_01708"  
/inference="ab initio prediction:Prodigal:2.6"  
/inference="similar to AA sequence:RefSeq:CAL35074.1"  
/codon\_start=1  
/transl\_table=11  
/product="putative DnaJ-like protein"  
/protein\_id="Prokka:DMACINML\_01708"  
/translation="MIFVLIILTILVFYWYKWTGKQDFLNSATRGAKGFAKGFARGV  
MEERIDEFKRRMNYVIALLAIAKSDGRVSENEAEMISQILDANAKDERERAFKAS  
FNEHKENIHDAFYVAKDFLKEVPLPKNERFNVLRVLFVLMALVDADFSAKKREILEQIA  
KAFDIAKSELDNFIASISNLKSTKKEKSLDEAYRILELSNNADLNAVKKQYRALAKKY  
HPDILNANNVSEELKKGVEKFKINEAYEKIKKHLEK"

gene complement(31296..33482)  
/gene="purL"  
/locus\_tag="DMACINML\_01709"

CDS complement(31296..33482)  
/gene="purL"  
/locus\_tag="DMACINML\_01709"  
/EC\_number="6.3.5.3"  
/inference="ab initio prediction:Prodigal:2.6"  
/inference="similar to AA sequence:RefSeq:CAL35075.1"  
/codon\_start=1  
/transl\_table=11  
/product="phosphoribosylformylglycinamide synthase"  
/protein\_id="Prokka:DMACINML\_01709"  
/translation="MDKETIKAHKISDEEYEQILEILGREPNLLELGVISAMWSEHCS  
YKSSKKYLNQFPTKAPWVIQGPGENAGVIDIGQGMAAVFKVESHNHPSFIEPFAGAAT  
GVGGILRDVFTMGARVAGLNSLKFGDIHDEKCGKHQKYLKGVVNGISHYGNMGPV  
TIGGECADFECFNGNILVNAFALGICKSEDIYAKAEGIGNPVIYVGSKTGRDGLGGA  
VMASDSFNEESKSLRPTVQIGDPFSEKLLMEACLELFKTDYIVGIQDMGAAGLTSSSF  
EMAGRSGSGMKLYLDKTPMRESGMTPELMLSESQERMLICAKKGYEDKVEIEFKKWN  
LDAVVMGEVTDGKMEFWHDELVGLIPIDPLSEKAPILDRPVSEPRYLNEIKDYSFT  
LKMSQQELFEKMLKNENINNKAFIYDQFDSSVQTNTIKADGALGASVIRIKENGASVA  
MAIECNRLNYVNPKTGAALAVAAAGRKVACTGAKPLAISDCLNYGNPQNPEVMWQFA  
QGCEGIKQACKELNTPVVSNGVSLYNETEGVSI FPSPTIVNVGVL EDANKTLKANFEK  
ENTIIYLLGESFGFEAASMAWKIQDKKVAGDLKELDYKAELALWNL LYMANQNSLLEC  
ANSVGVGGIAMTLAKMFAISSVGANLNSGFSDEKMI FDESASRAIVGLDKENEEAFLK  
LTQELGVKATKLG FSTKEQSFKLDNINLSKDELNKL YFDSFKEIQI"

gene complement(33493..34821)  
/locus\_tag="DMACINML\_01710"

CDS complement(33493..34821)  
/locus\_tag="DMACINML\_01710"  
/inference="ab initio prediction:Prodigal:2.6"  
/inference="similar to AA sequence:RefSeq:APA47335.1"  
/codon\_start=1  
/transl\_table=11  
/product="tRNA uridine-5-carboxymethylaminomethyl(34)  
synthesis GTPase MnmE"  
/protein\_id="Prokka:DMACINML\_01710"  
/translation="MNDTIVAIATAHGVASISIIIRLSGERALEFALKLIKKNELFPY  
ATFTKLFNQKNEFLDEAIVYFKAPFSFTGEDIVEFQVHGGFSVSEILLEELINL GAR  
LAEPGEFSKRACLKGKMSPLKALNIQDLILAKSANA AKIIARNMQGSLGELLDKIRTD  
LVKTLAFVETSIDYADDDLPSDLLEQISTMCEENSKILKEIYTLSESKKGLIEGFKIA  
IVGKPNVGKSSLLNALLSYKRAIVSDIAGTTRDTIEESFKLGTHLLRIIDTAGIRESK  
DEIEQIGIELSKSIEDADIILAI FDNRSRKKDEEDENIFKLLSQSDKKIFYLLNKSDL  
KTQFDKPCDIDFIELSVQNDIQILKEKLEKYLNSLSDGFLVSSIALINACKISSEAI  
LRAKELLENSELELFAFELNLAIGELAKFTKDFDRNEILDEMFGNFCLGK"

gene complement(34814..35665)  
/locus\_tag="DMACINML\_01711"

CDS complement(34814..35665)  
/locus\_tag="DMACINML\_01711"  
/inference="ab initio prediction:Prodigal:2.6"  
/inference="similar to AA sequence:RefSeq:CAL35077.1"  
/note="hypothetical protein Cj0957c"  
/codon\_start=1  
/transl\_table=11



```

/product="hypothetical protein"
/protein_id="Prokka:DMACINML_01711"
/translation="MRIEAKDLQSALTEASKSLECSVIDLEYEIIQHSKNGFLGFWRK
NAIIEARAKQPYSKKNRKFNAHKNDIHKNEKTYRKFDKNRDNKKEFETETRE
VKPKEYVVKSDIEFDSFHKESRETRNREDILDEIRIQLEHLLKSTCFNISLVELRMV
DEESVFIRLDGDDAALLIGKEAHRYKAISYLLHNWINLKYLLVRLIEAQFLENQIQG
MQIYLQGVIEKVKINGRGQTKPLDGLIKIALEKLRAEFPNKYVGIKQNNDRYVVIN
DFFKKDE"
gene      complement(35669..37264)
          /locus_tag="DMACINML_01712"
CDS      complement(35669..37264)
          /locus_tag="DMACINML_01712"
          /inference="ab initio prediction:Prodigal:2.6"
          /inference="similar to AA sequence:RefSeq:AAW35369.1"
          /codon_start=1
          /transl_table=11
          /product="inner membrane protein, 60 kDa"
          /protein_id="Prokka:DMACINML_01712"
          /translation="MNNSNNIFQQKRILLAVVISFLFFVVDYFFIPKQINLEKNIT
TAQADSQNATNINAPQQSVQANLNLTATSNIIPQDKIIADIKSEHFQAQIDSLGRIVN
FYLQDHKYQNDKGEPINLISKGNLPYPLEIRFSDPTVNAQAFSMPYTADMSELFIDEN
GSKTLKLTQQLSDLLVEKKITFYSGNYDIEVKLSKNINYFISPGYRPSIAVDSYTVH
GALVMDDQETIHTYEDGMDKDENIKNAWMTSAFDRIYATFFYNFDKPLNVTISKDAQ
DNPLVFAMSDNEFKAGGYIGPKEHVILRSIDPRLEAVVEYGWFTFIKPMFEFLNFLH
NHIGNWGWAIIVIMVLIIRIILFPLTYKSMISMNKLKDLAPKMKELRERYKGDQPQMMN
HMMELYKKHGANPMSGCLPILLQIPIFFAIYRVLLNAIELKAAPWAFWIHDLVMDPY
FILPILMGVTMFIQQLITPMTIQDPMQAKIMKFLPIIFTFFFITFPAGLTLYWFINNL
CSLVQQWVINKMFAKEHHKKQAE"
gene      complement(37261..37635)
          /locus_tag="DMACINML_01713"
CDS      complement(37261..37635)
          /locus_tag="DMACINML_01713"
          /inference="ab initio prediction:Prodigal:2.6"
          /inference="similar to AA sequence:RefSeq:ADN91133.1"
          /note="UPF0161 protein"
          /codon_start=1
          /transl_table=11
          /product="hypothetical protein"
          /protein_id="Prokka:DMACINML_01713"
          /translation="MGIKKTRMFKIVCLKTLRFYQKFLSPLKPPVCRYPTCSEYAFW
QFQKRNCILAFFSSFFRILKCNPFKGGFDYPKITKNITSCNLCFKPIFLAKKQLYFL
YIPHHQDKSFYLVKIIIFQRTNK"
gene      complement(37602..37928)
          /gene="rnpA"
          /locus_tag="DMACINML_01714"
CDS      complement(37602..37928)
          /gene="rnpA"
          /locus_tag="DMACINML_01714"
          /EC_number="3.1.26.5"
          /inference="ab initio prediction:Prodigal:2.6"
          /inference="similar to AA sequence:RefSeq:CAL35080.1"
          /codon_start=1
          /transl_table=11
          /product="ribonuclease P protein component"

```

```

/protein_id="Prokka:DMACINML_01714"
/translation="MKTFGKFSENEFSAVYKTGKKWYCDGIIIFYLKNNEQKMAVVA
SKKVGKAVIRNRSKRILRALFTQFENKLQNGKYIFVAKSEITQFPFSRLEKNLKWGLK
KLECLK"
gene      complement(37925..38059)
          /gene="rpmH"
          /locus_tag="DMACINML_01715"
CDS      complement(37925..38059)
          /gene="rpmH"
          /locus_tag="DMACINML_01715"
          /inference="ab initio prediction:Prodigal:2.6"
          /inference="similar to AA sequence:RefSeq:CAL35081.1"
          /codon_start=1
          /transl_table=11
          /product="50S ribosomal protein L34"
          /protein_id="Prokka:DMACINML_01715"
          /translation="MKRTYQPHGTPRKRTHGFRVRMKTKNRKRVINARRAKGRKRLAV
"
gene      38198..38677
          /locus_tag="DMACINML_01716"
CDS      38198..38677
          /locus_tag="DMACINML_01716"
          /inference="ab initio prediction:Prodigal:2.6"
          /inference="similar to AA sequence:RefSeq:CAL35082.1"
          /codon_start=1
          /transl_table=11
          /product="putative acetyltransferase"
          /protein_id="Prokka:DMACINML_01716"
          /translation="MPKFEIEILKREELDILLEMIREFAQYKEMENSLQCSKEKLETS
LFDNQFARAFLLKEDENIIGYMIYFYTFSSFWSGGIYLEDIYIRKNFRKKGYGRAVF
KFLGQICKKENLKRNLNWNVCLNDNVLGINFYESLKAHLKQWRNYRLSGENLEKLCEL"
gene      38674..39282
          /locus_tag="DMACINML_01717"
CDS      38674..39282
          /locus_tag="DMACINML_01717"
          /inference="ab initio prediction:Prodigal:2.6"
          /inference="similar to AA sequence:RefSeq:CAL35083.1"
          /note="hypothetical protein Cj0963"
          /codon_start=1
          /transl_table=11
          /product="hypothetical protein"
          /protein_id="Prokka:DMACINML_01717"
          /translation="MIRTLHYLKAMGYDFTDENLKRYSKLENFKDLRKNIQECTLCHF
SKSRCFTLMEKEIKNASLMIIDTLAHKNENEKGVLLNSKKGERLKFYLKEILGLCEKE
FYFSYLFKCFNSNGKFDDFSLQSCLPFFWNELELVQPKIILCLGEYPFKSLGFTDFNAL
RGEIFAYKNFFIMASFELEFIEKNPSCEKFFIQDLKKIKGFL"
gene      39279..40475
          /locus_tag="DMACINML_01718"
CDS      39279..40475
          /locus_tag="DMACINML_01718"
          /inference="ab initio prediction:Prodigal:2.6"
          /inference="similar to AA sequence:RefSeq:CAL35084.1"
          /codon_start=1
          /transl_table=11

```

```

/product="putative periplasmic protein"
/protein_id="Prokka:DMACINML_01718"
/translation="MKKIFLILCLCFSIVFAKEQKLVDVKAENFYFKISTQECSNC
LLELLEEARLYLSFLSEFVDQHDQFLSNIYAKLLNSITDFDKNLQKITSVKLAIIEPK
TIKSYSNTIINSSIAYLSSQRAEIKVKVFLTGTEDGDKIRSTLEQVQAQGYQYIAAL
TLKGVNQLKDYSGNMKIFIPTLHKNNVSFSNLNKNIIFGSIDYDAQVLLALLNKANSDI
AAFSDGSMLSSNLNSRVLEQNANTRFYRVEGEKLDYRLLRSQGS LNNTSIFLNTPLI
KTALISSQLRVYNIQPFVLLSTQINYNPTFLSLTQEGDRKNFILANSIDNHDDNLSYL
NEIFNQSIDYNWIAAYATSIGTDYFYTQFLNTESNLDFDEKIQNSQILYKVRMLMKGTKA
SFEELK"
sig_peptide 39279..39332
/locus_tag="DMACINML_01718"
/inference="ab initio prediction:SignalP:4.1"
/note="predicted cleavage at residue 18"
gene complement(40467..40841)
/locus_tag="DMACINML_01719"
CDS complement(40467..40841)
/locus_tag="DMACINML_01719"
/EC_number="3.1.2.-"
/inference="ab initio prediction:Prodigal:2.6"
/inference="similar to AA sequence:RefSeq:CAL35085.1"
/codon_start=1
/transl_table=11
/product="putative acyl-CoA thioester hydrolase"
/protein_id="Prokka:DMACINML_01719"
/translation="MKIRIYYEDTDAGGVVYHSNYLKFCEARSEIFFAKNTPIFDAN
KGHFLTKANCFIKSAKLGDIIEVKTKLLKIKNASVDIAQEIYRDEILLFKVELTLA
YIQNEKPAKIDIEIKKLFEEFL"
gene complement(41117..41575)
/gene="trxB_5"
/locus_tag="DMACINML_01720"
CDS complement(41117..41575)
/gene="trxB_5"
/locus_tag="DMACINML_01720"
/inference="ab initio prediction:Prodigal:2.6"
/inference="similar to AA sequence:RefSeq:CKG86610.1"
/codon_start=1
/transl_table=11
/product="thioredoxin reductase"
/protein_id="Prokka:DMACINML_01720"
/translation="MIDLNKYDFAYDEEGRIIWALYNDIEKGKLDKPRDVTSESRN
EFDDAMDGYENGMVTRFDVDTNEWSEQQAALDRDTLVLSAKLAALTPPQGYPNAPYY
FTPRLWIYKRGYLDKLLDPRIPAIYRYNFPRELRAKILKFAEENGIKD"

```

ORIGIN

```

1 atgataaaag taaaagtttt gaaatgatgg agtattttga aagcctagga cttaaagctg
61 atgaagtaca ctttggatac aatgcactca gtagatatac cgatagagat ggaaaaaata
121 aagaagtaat agagtatttt tttaaaaaag gatgcacatt tgaaacttat aatgaaaaaa
181 gtggcgatac tcctttgcat gaatggatac tatgtggcga agaagtgaag tatttagaag
241 aagctttaa actaggagca aatcctaata tgagaagtat taaaacagaa aataaattta
301 gctttagtgg tgcaggagaa acccttttac atcaagctgc agaactctgat gagaaaccta
361 taggagcttg cgtggaagtg ctaatcaaat atggagctga tgtaaattgcg gctaattgtc
421 gcatatgtga tattgaagat gggaaaattg aatattatga tcctgcaacc ccattggata
481 gagccaacag agctcgcaat gtgagcaaaa atataaaaat cttaaaaaaa gcaggagcta
541 agacttggga agaattggtt gaagaataca atatcgatac aagcttggaa agaatagaac

```

601 aaattaaaat atatgaagaa agaagaaaag ataaaaaata agattaataa ggcaaagaac  
661 aaaaaaagga tttttcattg gaatttaatg atataaattt taaaatcaaa gaatttgaaa  
721 gtgtggatat catcagtgat tattctcttg tcttttattt gcctaaagaa gagcatatga  
781 taggagaaaa agatcaagat ggtaaaattc gcatcaataa aagtaattct ttaaaatata  
841 tagaaaaaat caatgaagaa aaagaaaaag aaattgaaaa acttaaactt caaagcaatg  
901 aaaaaatcaa tgaagaattht gataaattaa aagatggtagc tttacctact aaagaatata  
961 aaagaaaaaa ttatgaatac gatgtattht atgatgttht tacaagtaag gataatataa  
1021 acaagtgcac aaaaaaaatc ccgataaaaa atgggtgtagg aacgctaaaa tcaaatttct  
1081 tacgaagatt ttatgaaaat tctgtcaagg gtaagtataa ttgtaaatgg tgtcttatac  
1141 ctagactaat ccgcaataaa ggagaatcta gttttgatcc tgtgcctatt ttaaatagta  
1201 gctttgtcat ttcagaatta agcaatatca aacaaaaaac ctttacttht caaagaacaa  
1261 tagccaatgt ggaacatcca agtcatttht ctttacaag tcctaaggaa tttaaaagta  
1321 tgcttgaaaa taagcaaagc tttgcttctt atgggtggcaa agaaaaacaa atagaagatc  
1381 ttttaaaaac cgcacaacat aaacttgaag ccattaaaaa agcaaatgga atttctgaag  
1441 aaaccaagga agcttttaca gaaaaacaag aagaagaagt tagaaaatgt gaaaaattgg  
1501 aaaatagcaa gaaaaaaatt tcacccaac tcataggaga tacgggagaa tatgtcgctt  
1561 ctttacttht tgggaaaaga tctacacgct atttaagcaa tcaaagaaaa ctggatgcta  
1621 attttaatat ctatagtht aatcatacca tacctgattt tttagtaagt attaatggta  
1681 ttcctagtht agtcgaagtt aaaaatgtht aagthcaaag ctaacagaa caaataagct  
1741 ttgagctaaa actggctaga gaatatgaac ttgattacat ctttgtgtgt aatcattata  
1801 cacatttaac agaaaatgta gcaggaagcg cattgactcg tgaagaacac gaagagctag  
1861 cacgagatga taaaggcaaa gtgggtgagt ttaatgaaga acaaaaaaga ttgaaaaaag  
1921 caaaggtggc agaagtctta aatgaaaagg atgatttagc taatgaagaa tttattaa  
1981 gtgtaagtga tggaaataag tatttaaaag aaaggagaa attttataaa gttgcttcag  
2041 atgthtatac taaaaaccct atttataaaa tgggctthtga gaaaaaaact tcaaatcaa  
2101 gthgttgata taacattgtt aaaagatttht taaaggact ttgctaaaag actagggata  
2161 gacgaaaaag ttttgctgtt aattggatat aatcctcaac gaggggattc tggacatat  
2221 gactatacag taatacttht agatttgaat caaaagctt cttatgttga ttttattgat  
2281 accattattc atgaatttht gcatttht atttattgca taaaaaataa ttctaaaaat  
2341 agtatagaaa aattgcttht tcttgatatg gtacaatttht atataccgtg gaatttht  
2401 aaaattthtca atagttatga taaaaaatgc ttgatttht ataatagaaga tgaacgaag  
2461 aagtgttht aaatcgcac atattatgga agttggaaat ttttaaatcc cacattagat  
2521 ctcttgccaa gtcctthtata ctatcttcag ccaagtgagt tagactctag gattatggca  
2581 tattatttht gaaaggaaat taaattataa tgactccacc atctttacca gatgtagaaa  
2641 aacatgaaga tttcttaca accagaaaag aaccttatgc tatttattta gccataaaca  
2701 caacataaaa agtttataat aatattthtgc ctagcgagaa atattthtgg aaatttaata  
2761 atatgaatga acttgataaa tggatataacc caaaatttht catatacctt ggcaaaattg  
2821 tttthgataa aaaagacaac aaactcatcc caaaatatac agccgctaaa tttgaaaatt  
2881 tagaagaaga agthtaaaag ataaaaaatc ctttatggct tgctaataaa aatcctaatt  
2941 atattgaacc taaatttht gatggatga gtgggggtta ttattthtga agtccaaata  
3001 atttagagta tcaatgcaaa atagaaaaag acactcaagt ttttaagcaa gaacaaatca  
3061 tttcttatgt gaaagaactt tatagtaaaa acacaataat aataaaaaat tatattgatg  
3121 caatcaataa agactatggc ataaaacctt tcgtatttht tgatgaaatt tatgatgaat  
3181 taggagaagt tggcattctt acaaaagaac aagctaataa ttttaagat aaaagttata  
3241 ttaaaaaaga tccgatattg cttgctatgc ttgatttht agcaaaacaa aataaaaaag  
3301 atgaagatta tttaatcact tttgatgatg agtatttht tacttatttht gtttggagtt  
3361 taaaagattt cttattagag ctttcttatg gtttgtthtca agatgaaacc gagcttctt  
3421 ttaatcctgc agcttatatg gatgacacaa aaatatatta tcaaaattta aacgaagaaa  
3481 taaataagcg ttatgaaaaa atattgctta atatgggatt tgaaggagaa aatggttatt  
3541 ttaaagatta ttatgattat ggctthtggca ataatggat ttttgaattt agcatatatg  
3601 attattthtgc ttatgatgaa ataggagtac aaccaattca acaaagtcca tatgttccac  
3661 ctaaaagccc ttttgatagc cctaatttht tctattctga tggaaattat cacggagatg  
3721 caaagcttht cccttctgct ttaggaaagt attattthtga gctthtatac caaaaagaaa  
3781 tttacataga actthtctgc cttattatc caagcataaa agattthtcca gaaggttggg

3841 acaataaaat gctagaaaaa gctaatttaa aataaaatta tagatatgag ctttagagta  
3901 ggagttggaa gggatgagag tgtaaaagaa agcaagctat gaaataatth taacaacgct  
3961 gtaaaaaata attagacgcc taaagacatt atctaaacaa attgtattht tagtgthttt  
4021 gaagctgtag agthtttaaa agcttgtaaa agthtttaag aaaaaaatga aatagataat  
4081 tataththtt caaaaactat ccccaatthg ccggaaaaaat cgcttatata tactatagat  
4141 ttgatttaat caataaggaa thtttaaaaa gtgtatcaga aaaagataaa ggaaattatc  
4201 ttcaagttag agatggcaaa tatattagca ccataattaa taaaatthta cccttagaat  
4261 ataagaatgg taaaagthtt aaacaattcc acacagagct thtaataaac aaaaacagag  
4321 atcttaaaaga atgtaaagat thtttaaaaag cthtaactca aactctthgt aaagaatthta  
4381 atthacctth agaaaatgta gtctthttata gccaaaagcc tagtgatct thtatctthg  
4441 gagcttatga agaaaataag gtcagattaa aacaatacat thtaaaaagct taththtaag  
4501 aathtacaaa aacggtthtt cacgaatgta ggcaththta tatagaaaaa tattataatc  
4561 acaatatgga tgctctagac agatatgtht thttatctga aaaagcttht atcaatgaga  
4621 aaattathth tgataaatht agtagaatht gcgatcctag tgagaattat ttagtaggth  
4681 gcaatatagg tgctatacaa gatgcttatg aaatccggcc caatgaaaga gatccaagat  
4741 atgtagaaac cctcataggt agaagthttat aatcaaggaa aataatgaaa actataaaaa  
4801 taccgctthaa agattatath tccaatataa gagaagataa aactaththac thgggctthg  
4861 aaagtatath gagtataaaa ggacttgatg aagaatactt aaaaaaagaa tataatctta  
4921 agagaaatht caaathtgaa acaagcttht atthaggtaa aattataatc aaagaaaaaa  
4981 atatcatctt taaagcttht aatgthgatg agaathgctt tgaaggactt aaagaactth  
5041 tctcaaaaaa taaccctat acaattatag ataathtaga thtaaaaaaa tathctthaa  
5101 aactthataa agataatath gaaththtaa ctctthtat taatgaaath aatcaagthc  
5161 atggtathaa actthaccat gthttacath taatgctthta aaathctaag ctthcataa  
5221 agcatgagth taattaacat agcathctta aaactgctat aatcatctth ththgcttht  
5281 tcctctaaa acathatthta gcctthtagt thcathctcg ctaagataat thactththc  
5341 thctgcttht tcagththta acctaathth thcatatcaa agctaaaaag gaataagthca  
5401 tcathattht cacthataaa aaagctagth aatactctca aataagthaa ththgthctth  
5461 ttgataatht atthgctatht thtaathat thtccaaata athaagaaaa thaatcaaaa  
5521 aagthgthtt tatathctth atthgcttht catctgata atctagthaa tathccgcaa  
5581 gctcaaaaaa tacacctata aaacaataaa gtgtctthta aatataatht taththata  
5641 aataaaatht catataathc acatacaaca tcagaaathg ataataaata ththctthga  
5701 ththcttht tgatgthttt aagththtath ccaacaatht cataaaactt tggththgth  
5761 gtaththath tatcttcagth gtaaaaaath tataththgct aathagthct tcaacaatht  
5821 thataaathg aaaaactata ththcaagth ctthgctata caaataatha ththataact  
5881 ctthtaathc aacthacaaa accaaagctga aathatgath thaththtagt ggatgaagca  
5941 caggatathc acgctthgtg tatcgacath gtgctthaat aaaaacaagc thaaaaagth  
6001 ththtagggg atactththc gathattht aaaththtagg gagcggtaaa thctthtagaa  
6061 atathtagcath ctatgccaaa atctcacath ththacctaa cacaaagtht taggthgthcg  
6121 caaaatathg ctththattg caactcttht thgaaaatht thaatgctcg gcgagaththc  
6181 aaaggaacaa aaaaathcaag thaatgaaath gtcaaaaacg aagcaaaagc cathgtgthg  
6241 agaactaath ctaagthtath tgatathagcc gtagagaath tagataaaaa athaththth  
6301 gtagggaggga thaatagthta tagththtgath gaththattag acatacaaaa thctththth  
6361 aaaaaacacg aathatathc aaaccaatht athagthaaath thgctgathh aaaggagctth  
6421 ctthgaathata thaatgaaac thaaagaagth gaththaaagc aaaaathctt ththctththc  
6481 aathatgthc atggcgatht tataaagctth athaaagcca thgaaaaaag tagcgthaaa  
6541 aaacaagaac aagctgathh aathctthagc acgggacaca agagcaaaagg ctthggaathg  
6601 acaathgthg aathatthga thathththta aathatcaagc aagaactthga agaaagathg  
6661 caathcacca tagcaaaaga agaththaaac ctththtatg thgcaathcath aagagcaaaa  
6721 aathctctha gtathgcaa agathactthg ctthgaaaaag aaththataca agaaaththta  
6781 gaaaggataa thaatagaath aaaaataaaaa aathcaaaaa agathggaagc thcaagagc  
6841 aagththatha thctgthcag gaggthgtac aathgcactc agthaacgath gthaacagthc  
6901 gcctathggath thcaagagga athcthaaaag gthathgaaath aggcaaaagga thththathg  
6961 caaaagaagc cathatthgaa ththcagaaaa athgathgtht aththatha aggagagaga  
7021 aaaaathgagc agthathgcaa aagathagthca thththaaath agathathth thththataa

7081 atataacaaa atgactttta gtagaaaaga atgtgctaaa attcttggga tatctttgca  
7141 aacttttagat agattgacaa aagataaaaa ataaaatcaa tgaatataac tcgttttgta  
7201 ttattctcca ttgaagaaat agctaaaatt ctctcagggg ctaagtcaac aaaatgaaca  
7261 gaaaagatag ggttacgcta gctgcttatt ataaaaataa aaagctcact tgctttggta  
7321 agtgagtaat ttaaaagtat atgttaaagt atatgttttt tagatattta atttttaaag  
7381 tatggatatt tagatatttg attaataaat cacacgccga cctcaggcac tattgcttct  
7441 taaaatcata aaattccaaa aaaattttta ttgtttatat ttgctcgaaa aaatgcttct  
7501 aaaatagctg aaatatttat ttatagatat taaaaatatt tttatataaa taaaatatgc  
7561 tttaaattat gttaaattat taattataaa ttatttataa ataataagct cgctccctta  
7621 aaataagata aaaatagccc tatattctta aataagacta aaaatgtatg attaaactta  
7681 aattaaacta aaatttgata tagttcgcgc gatcaaaaaa gtttaaataa aaaattaaaa  
7741 agtcatagtt atttaaactg aaacatttgt gttatttttc atagaaaatc ataatacaaa  
7801 taaagatcta tataccgaat aactaaaaaa aaaggggggg ggtatggaag caaaaggaat  
7861 agcgatattt cctacaaatg ttgcatttag taaaaaaca aatgcttttt tcaactgaatt  
7921 agaagatcaa ttcttaaaag aaggggctcg taataaaagt gccataaaac tagattttga  
7981 atattatatt ttatattgtc aatttttaca aatagacaaa gaatccctat tttttggaag  
8041 aaactatgaa cttgtgtttt gttttttact ttattatagg gctttattaa ataaaaacaa  
8101 tactcaaaaa atcgtagcaa aaataataaa tgttatacgt tgccaagata gattaccaga  
8161 gaaagtgcac tatagagaaa aaataatttg tatggataat caacacagag atctttctca  
8221 aacactaagt tcatgtattg cagaatttta taattcaatt gatctataca atacctttag  
8281 aaaaaatata ggatttgaaa atagaaagaa aatagcgata gaaatgttaa atcgcgcctc  
8341 agaacactat ggtttttttg gcttaagcag gggaggaata acatataaag aagaaaaaat  
8401 ctcttgctgc cctatacaag cattagatga gtttcatcat ggtatgtcgc atctatgtgc  
8461 agttttctta aaagaagatg gacgatatac caatctagaa agagcgatcc ctcaactcaa  
8521 acgtggaatg atggaagtat acaaaacaat aatcagagat tttatgatat taaataaaga  
8581 tgcttttagga gtcaaacaag aagccttaa aataagagaa ttagaatatc aaacatagga  
8641 aaaacccaaa acagtaacaa aaaaccctac cacaaaccta accaataaaa aagaagagaa  
8701 agttatcca ggatataaag aactgtgcga aaaaattgtc agtcaaatca aaaatgcaaa  
8761 gtaaaatcgg tatgaattga gcttgagtat gcaatttagc ttatttgcta tttgcatact  
8821 tagagccatt ctttgaagaa attaaaacaa atcctatcat aaattaacta ttataatgta  
8881 aaggcaaac aaagtaaaaa tttttaggcc aaatttcaa ttttaattct cttttatgag  
8941 cattaatgat ttcttttagaa agcgataggc ccaatccatt tcccttaagt ttagtagtct  
9001 taaaagcttc aaaaactaaa ttttcatctt tgatttcaca accattatca taaaccctaa  
9061 tgtataaatt ttgttcatca cagcttgctt gaattttgat tttaggattt tcgcactcac  
9121 tttcttcgat cgcactatg gcattataaa tcaaattttg caaaaccaa gataaaagtg  
9181 cttatctcc ataaattttc atatctaaaa aattaatttc aaaatcaatt tgagatgagt  
9241 aattgtaaga atttatagca ctttcacact cttctgttaa ttctaaaaga ttaaactcgc  
9301 ttgcattgat atgtacacc ttagtaaaaa gcaaggtaga atttacaata cgctctacc  
9361 tagcaatagc cttttgaatt tcaagcaca tatgtttgtt ttttagctca ctacgagaaa  
9421 aaagcgtgga ggcaagtaag gatatagagc ctataggatt tcttatctca tgcgctaaat  
9481 gcgccgcaac acttcccata ctagcaagtc tttcattgcg tttttcatcg ctaatatccg  
9541 tagctgaaac tatggttttt tcattatgag caataatttt aaccgcataa aatctattct  
9601 caaattcaag ttcatcacga tttttttcaa gactgataat atcaagcaat ttaggttttt  
9661 tcaaagcttc ttgattttgc aaaataatat ttttttctt atctaaaatc caaagcgcac  
9721 taggcaaac ctcgataatc tcatctacca tagcacgcaa agaattataa ttttcgttta  
9781 aaattttata ttcgttttct acaatataag tttgctctat aaggctttgt aagccttttt  
9841 gtagggtttc tttttcactt gagtctagac ttttataaat attttcgtt atttattttc  
9901 ctctaataaa attttaaaat catttaaatc caataaaagc aaatcttggt tacaattttt  
9961 ataaaattct ttactaaaac cattttttga aataataata taattatttg gctctagttt  
10021 taaagatttt gcttttaatt ctaaaagggt taaaatattt ctacaaattt ttttattttt  
10081 aaatttaact tcgccgataa aacttatctt gtcatcctta taataaagat caagttctaa  
10141 atttttatcc caataacttt gcacccact cacttgaaat tttttttcaa gtaattctct  
10201 ggaaagtgc tcaaaacaaa aactttgata aagttcaaat ttctctttaa tcaaagttaa  
10261 aacttcttca tagcgatttt gcaaaatcaa cttttcattg ggttttagaa aataaaaaaa

10321 gaaacgagta aattgattgg caaagataat tttatcttgt atcacataag atcttaattc  
10381 ttttttaagt ttttgtcgtt tatctcttac ctttttcgcc tctttgctat gctcaagctt  
10441 tataatccca actcttaaaa gatattttta agttgataaa gccttaaaat gctgaatttt  
10501 tctattgata gaaaaacgct tacgattggt tttagctagc aagctaagag cgtaagaggc  
10561 ggtctcatcg agcttaaaac aatccttgat atctaaatag tttttgagca aaagatattc  
10621 tatattgtga aatacatctt cttcaaaatt taaactatcc aatctctcaa aaccctcaaa  
10681 aacactataa aaatcaaaaa ttttagccaa agctgaagtg ttgcaaattt ttgcaaaatg  
10741 attaaaattt atatttttcc tttttaaaag tatttttata gtataatttt agcaaatttt  
10801 taaaggattg tgcttgcaaa tttcagattt aaaaaaagaa ataattttta aaaaaggcac  
10861 cttgcatttt gactttaccg ctagtgcctt ggcattaaaa tgtgtagaaa aagaaattgc  
10921 aaaaatactg ccaagttatg caaatactca ttctgacagc tccttaaaact cttttaaaac  
10981 tcaacaattt tacgaacaag cacgcaaga tatcaaaaca agtcttaatc taagtgatga  
11041 atttgcactt attgcttgtg gatcaggctc tagcagtgtc attaaaaaat ttcaagaatt  
11101 acttgggaatt tatatcccg cacttggtta agaaagatat tttgaaaagg tagataaaag  
11161 caccctacc ttagttatcg tagggcctta tgaacatcat tctaacgaac tttccttcg  
11221 tgaaggtttg tgcgaatgta taagaattcc cctagataaa aaaggaaaca tagactttga  
11281 aatttttagaa aaagttttta aagaaaatca acacagaaaa attatcgcta gtttttccct  
11341 agcttcaaat gttacaggta tattaagtga ttataaacgc atttctaaat tagtgcgtaa  
11401 atttaaaggc atagtcgctt ttgatgcac aagctttatc cttataaaaa acatagcttg  
11461 caagtattat gatgctttat ttataagttc tcataaatta atcgggggca taggagggtc  
11521 tggcttttta gcaatcaaaa aagaactttg cggaaacaaa ccaagctttg ccgaggagg  
11581 aactgtggat tatgtttcgc gcacctctca atgttatctt tgcaatgaag aggctttaga  
11641 agaagggggg actcctggaa ttttacaact aattcgtgcg agcttggctt ttaaaataaa  
11701 agatgaaata ggcatagaag aaatagaaaa aaaagaagaa attttaaaag aatacttctt  
11761 tgaaaaacta aaaactatac ctcatttaat cctatatgct aataatataa aaactcgctt  
11821 acctatcttt gcttttaata tcaaaaacat ttctcctttt gacttagcct atgagctaag  
11881 taaaaaatac cacatagaaa cacgcgcggg ctgtgcttgc gctggctcct atgggcatga  
11941 tttactaggc ttaaaagata atgaagaatt aaaaactaaa ccagggttggc taagaattag  
12001 tttacattat actcacgaaa aagaagatat tgactatttc tttgaagcac tgcaaaaaag  
12061 tataataaaa ttgaaatttt aatgatggcg cagcggacgg ggctcgaacc cgcgacctcc  
12121 gccgtgacag ggcggcattc taaccagctg aactaccgct gcaccaaga agtaataatt  
12181 taatggtggg cactataaga ctcgaactta tgacatccac cttgtaaggg tggcgctcta  
12241 ccaactgagc taagcgacct taatttttgg cgaccctagc aggatttgaa cctctgtttc  
12301 cacacagaga gagtgttgtc ctgggccact agacgaaagg gtctaaacc gataagtggg  
12361 gtcccgtgtt ggattcgaac caacggcccc ctcttataaa gggagatgct ctaccggctg  
12421 agctaacgag acagatggcg cagcggacgg ggctcgaacc cgcgacctcc gccgtgacag  
12481 ggcggcattc taaccagctg aactaccgct gcaccaaga agtaataatt taatggtggg  
12541 cactataaga ctcgaactta tgacatccac cttgtaaggg tggcgctcta ccaactgagc  
12601 taagcgacct taaaaaataa gtgggtgtcc gtgttggatt cgaaccaacg gccccctct  
12661 taaaaggagg atgctctacc ggctgagcta acgagacatt ttttaaatga aaatgtgatt  
12721 atgcaaaaat atataccaat ttgtcaagga aatttagcct atttttgata ttttctttcc  
12781 aaatagcgcg aaaatatacc tatgggcaag gttaaaataa gatatgcaaa ggccaaaacg  
12841 atatacctt ccaaggttgc aaagatatac gaatttacct cttgtatgct ttgagtaagc  
12901 tcattaagcg caatcacgct tagtaaagaa ctgtctttaa taagattggc aagttgcca  
12961 ctaataggag ctaaaatatt tttaatagct tgaggaaaaa tgatatataa aaaaatttgc  
13021 ctctcgctaa gtcctaaggc tctagcactt tctatttgaa tgataggcac acttaaaacg  
13081 cctgctctaa aaatttcaga taaataagcc gctgaaaaca ttgaaaggat aaatatcct  
13141 acaatatagc gatcgtcaaa tcctaaacta tttgcaatga tataaaaaac caaaagtact  
13201 tgcacaagta aaggagtcc acggataagc tctacatata aagtagcaaa aaatctcaaa  
13261 ataataatct tactcaaaaga aaaaaagcaa attacaacc ctaaaattat gctacacatt  
13321 aaagcaaaaa aactaacaga taaggtttga aaaaaacat agataatttt atttttatat  
13381 tctaataaag aagtaaaatc aaaatgataa gcgctcacac taaagctaaa ataaaaaat  
13441 aagcttaaga taaaaatcaa aattaaagca ttaaaaaata tcactttttt agaaagtggg  
13501 ttttgaattt tgaaattttt acatttttgt ataaataaag acaagttttc tcctttttat

13561 tgtagatatt ttagccaaag tctaattaaa ttttaattaag ctctaattttt aaaattttttt  
13621 ataagttaaa cttaactatg attataaaaa caaataaagg aaactaaaat gttgatttta  
13681 ggacactatt tattaacaca aaattcgaat ttttgcttta ttaatgaaag caaaaaacta  
13741 aaaaaagatc aaatttcttg ctttttatac aatgaagaaa tcatccaaaa tgcaaaaaat  
13801 gaaaatttgg attttgctgt tttgatacaa gataaaaaatg aaatttttct aagcaatgct  
13861 ttaggggcta aatttttact ttttgatgat gaaaatttag ctcgttttgc ttctgaagta  
13921 gcggaatttt atctctttga tagtaaaatt ttactcctag tagaaaattt acacaagctt  
13981 gaaaaagctt atgaattaag acttgatgga gtgattttta aaagtctgat acaagattat  
14041 cattaagaaa aaatcatcct tgatgataat ctttatttta atttctagta aaatacatag  
14101 ctgcataaat tccaaacata gctataaagg ttctatcaa taatgcatat tcatcttgct  
14161 ttaacataat aaacaagcat aaatataaaa taaataaaat cgtagccatt actatagcaa  
14221 aacgcttttg ccccatgata cttaaagtgt aaagtataa aggtataatt atagccaagc  
14281 ttgaaaaaag ataagcaaaa ttaaactcta tgcgctcgct aaaacttaaa agcataagat  
14341 aaaatactat caagcttgct cctaaaatcg catattgaag taaaataaca tttttcttg  
14401 aggcaagctc acataaaaac aataccaaga aggttaaaat aataaataaa tatccatatt  
14461 ttatcatagc atcaatcaag cgataatcat ccacccttg ataaaactca acgcttaatc  
14521 tttttttctc gactttatca tctaaaatac tattttcaaa ttcataaaaa gactaaaac  
14581 cttttttatc aacagaataa tcattaggta aagcatattc aaaagaagga tttgtggcat  
14641 ttgagtttat atgtatgata ttttctttag cttgtagatt agcatcaaaa gaaccataac  
14701 cttttaattg taaagtcca cttaccata atatatctt taagacatta aattgcaaat  
14761 tccttaattt tcctttaaaa aattggatag aattttcatc aaaattgctt aaattttcta  
14821 tattaagct tgcatataaa tctacaaaag cagtataaag tggatttta taaataacct  
14881 tagtgcgtt ttgatatttt aaatccacc aaagttctaa tttattaggc aaaattttct  
14941 catttaact tgggtgataa aactcatcac taccacaagc ttttccatc aatgaaacaa  
15001 cttttgctg actatatttt ctatcttcca ctaaagtttt taacatcaat aaaggaataa  
15061 gcaaagctat gcttataata aaaatcaaaa caccttttaa agtaagagat tttagtcttt  
15121 gatttctagc atattcttg atgaatttat tttcgtcaaa tttttgttcc atttttttat  
15181 tcatttctta aagtatctaa aacattgatt tgtgttgctt ttttagcagg ataataagaa  
15241 gataaagcaa tgattatcaa ggcaccacc aagggttaaag aaaaatccat cacagataaa  
15301 tcaagcggta atttactcgt accataaaca tctgcaggca aggtaataat atcaaaattt  
15361 cctaaaagcc acaaagcaaa aaatgcaagt atgattccta tgatcatacc gccaccact  
15421 attagcatgc ctaaggcaaa aaagcttttc tttatttcca atttacttgc acctaaggca  
15481 agcaaaagtg cgatttcagc acgacgattc atcactatca tcagtaaaga actcactata  
15541 tttaaacttg ccacaaaat aataagcatt aaaactataa aaagtgctct ttttcaagc  
15601 ttaagagcag aaaagaagtt ttgatatttgc tcccaccagc ctacaacggc ataatcactt  
15661 tttaggtagg atttaagttt ttctacatct ttaaattgcat tttcactata aacatgcaca  
15721 ccatcataac tttgctgatt gctgatacca agtacttttc gaagcgcatt tacatccgta  
15781 tacatataag ctttatcata aaatataagc cctgaagtaa aacgcgcttt cacatcaaag  
15841 cgtttagctt gcggaactaa agaaaatcca ctgggactaa gatttgaaaa gataagtгаа  
15901 agtttgtcgt ttttatgtaa gttaagttca tctgcaagca ccgaaccac aagtatatca  
15961 aaaccactta aattctcatc ttttaaagct ttagccacca cttcattgat ttttaattca  
16021 tcattgaaat tcacacaaa aaggacgcct cttcaaagc gattatctgc ttttgctaca  
16081 acttgagtgc taatatacgg actaaaaagc aaatggggaa atttcttttt aagctctttt  
16141 accaaatctt catccatagg agaataaaat tttggcacta tggtaatagg ataattcatc  
16201 acaaaaaaac gcttttcaaa ttctttatca aagccattca tgatagccat tgccacaagc  
16261 aaaacacaaa gtcctacaca aaccctaaa aaagccaaaa gcatagagag attgataaag  
16321 ggttgctctt tatcaaatct taagtattta aaaagtagat attttaaaac gctttttttc  
16381 aagctaaaat tccttgttta ggcccgcttt ttccatggca ttctttaaat tttttaccgc  
16441 ttccgcaagg gcaaggagca ttgctggaa cttttttaa ttcagcctcg cctaaattat  
16501 ctcactagc acccatttcc actgattttt caaataaagc ttcattttct tgatttgctt  
16561 tttcttctaa attctgcgct tcttcttggc taaatttcac gctaaaaagc aacttaatgc  
16621 tatcaaattt gatacgatta acaagctcta aaaaaagatt ataactttct tttttgtatt  
16681 ctactaaagg atctttttga ttatatccgc gaagtcctat acctgttttt aaaatatcca  
16741 tttgatacaa atgctcacgc caagcattat ccaaaacttg taaatacaaa atacgttcta



16801 tatgatgaag ttgcttagaa tctaattttg acattttttc atcgtatgat ttttctaaaa  
16861 cttcacttaa tttttcttgc atttcaatca agctaagatt ttcaaaatcg ctttgcttga  
16921 gttcaacaga acattcatct aaaattttag cttttaaatt ttcaaaatth aaatccgctc  
16981 cactttcttc aatcataaaa tcattcataa tataagcgct atattctgca atattttgtg  
17041 aaattttagt tttaatatca tattcttcat ctaaaagttc attgcggtaa cgatagatag  
17101 tctttctttg ttcatggcc acatcatcgt attcgagcaa atgttttcta ctttcaaaat  
17161 gcaagctttc aacctttttt tgcgcatttt caactgctct tgttacaatc cttgattcta  
17221 tatgctcacc ctcttgtatc cctaagcgat ccataatatt tttgatacga tctccgcaa  
17281 aaattcttaa aaggttgtct tccaaactca aataaaaacg gctaatacct ggatcacctc  
17341 gtcttccggc acgaccgca agttgattat caatcctacg gctttcatgt ctttctgtac  
17401 cgatgatata aagtcgcctt aaagccctta tctcatcacc gatttttata tccacgccac  
17461 gacctgccat atttgtagcg atagtcactg cacctttttt acccgcatct tggataatta  
17521 aagcttcttg ctctgtgattt ttagcattta aaacatgatg aggaattttt tcttttaca  
17581 gcatattgtg aaaaacttca cttctttcaa tgctcgcagt tcctacaagt acaggctgac  
17641 ctttagcatt tgcttttttg acttcttcca ttacagcttt aaatttttca ttttgagttt  
17701 tataaattaa atcatcttta tcctgtcttt taataggaat atttgtaggt atagaaacaa  
17761 catccaaact gtaaatttga gaaaattcag tcgcttcagt ttgtgctgtt cctgtcatac  
17821 cagctaattt ttcatacatt ctaaaataat tttgaaatgt aatatcagct aaagtctgac  
17881 tttcttcttg aatttttaca ttttccttag cctctaaagc ttgatgaagt ccttcgctaa  
17941 atcggcgccc ctgctttaa cgacctgtaa attcatcgac gatgattact tcgttatttc  
18001 ttaaaacata atgcatatct ttttcaaaaa gattgtgtgc ttttaaagct tgatcaagct  
18061 gatgagctaa gattgcatta tcaaggctgt ataaattttc tacaccaaat aatttttcag  
18121 ccttagcaat tcctgcttct gtgattaaga tattgcgatt tttttcatcc actataaaat  
18181 caccttcagg cttagcagga ggtaaaactg cctcacctct ttgcatttgc ttagctactt  
18241 catttgcttt gatataacca tctaaagtac gattttagg gccactgatg ataagtggag  
18301 ttcttgcttc atcaatthaa atgctatcca cttcatccac gataacaaaa tgatgttctc  
18361 tttgcacctt ttcagccttt gaaaatttca tattatcgcg caaatagtca aagccaaatt  
18421 cattatttgt cccataagta atatcacaat cataggcttt tttatgctct aaatcactat  
18481 tttgagatga aagaatcacg cctacgctaa agcctaggaa attataaatt gcgctcattt  
18541 gttcggcatc tcttttagcc aaataatcat tgactgtaac tacatgcaca cttttccat  
18601 tcatagcatt tagcacaaca ggcaaggttg ccacaagagt tttaccctcc cctgttttca  
18661 tttctgcatc ctttccctca tgtaaaacca taccgccgat taactgcaca tcaaaatggc  
18721 gcatattthaa agttcttttt cctacttctc taactatggc aaaaacatca tttaaaatat  
18781 cattttcttt tttttctccg cttagaattt gctctttaaa ttttccaaat tcagccttta  
18841 attcatcacc actthaaattt tgatattttac tctcaagagc atttatttgt gctactcgtt  
18901 taagatactt ttttacctca cgatcatttt ttgtcccaa tacggctttt aaggatttta  
18961 aaaacatttt taaacctctt ttgatatttt tttcaagcta tgattataac gattattthaa  
19021 ttaaaattag ctagaatggt ataaaaattc caaaataaat ttagaaggca agcgtatgaa  
19081 aaaaatattt tgttttatttt tcttttgttt aagtcatatt ttagctattg atctthaaat  
19141 taatacctat tctagtaatt tcacgcagtc agthaaatca aaagattcaa ccctttcata  
19201 ctcaaggcat tttattthaa gtcaagaaca agcttatttg agctatgaca ctccaagcaa  
19261 aaaagaaata tatatcaata aaaatcaaat tgttttagta gaacatgatt tagaacaagt  
19321 tgtcttttgc cgtcttgata atatccctaa tcttaatgaa atttttaaaa aagcaaaaca  
19381 tttaaacgac aatcaactga tcgcaaaata tgaaaatata aattatacta tcacactcaa  
19441 agataatgaa attcaaagca ttgcttataa ggacgaattt gaaaacgata ttttaatcac  
19501 tctaaatcat caaatcaaaa accctgctgt caatcctgaa gtttttaaaag ccaaatthcc  
19561 taatcattac gatatgattc gataagattt aaggataggt tgaatttgta tccaaattca  
19621 actcaaagcc tttttcttta gagttattat tttctttaaa aatttgcggt ggatttgca  
19681 tcaaatctcg ctttatcttc tcttctatat ctgtaatttt agggatgta agggatttga  
19741 tatcgatttc tccattatca tattgatttt gtgtattatc atcttgaaaa agttgatcta  
19801 tttgtggagt ttctatatca gaaatatttg gaaccgcagg agtttgagga atthctaaat  
19861 tatcaagagc ttttttaact tcaactgccta catttttttc cttagcttca gtacttgcca  
19921 agaaacgctt aaattcttct aaatcaaat tttctactcc gctthaaagt aagatataaa  
19981 tctcgtttag ttttaattttg tattttttat ctataaattt ttctaaagtt tttttaaaat

20041 tattttttcc aagctctgta aaaatatctt cataaaaaaa tccagaaatc acagtattta  
20101 ccgcatctgt aagcttgttt tcgttttctt ttaatttctc gccttcaaat tctaaagaaa  
20161 tttcaacttt tttaagcaca tttgccccgc tttttgagta taaatctgtt cttattttat  
20221 caagttctag actttgtgca ttaaggctta aagataaaaa agtaagtaaa aatatttttt  
20281 tcatttctcat ctttttaaat gatattatth tctaattcaa gatctaaaaa atcattatth  
20341 tgataaaatt ctcttacgct tgtatcgaat tttaaaatac tagcaaaaata ggcttttaaaa  
20401 tttatttcttt ttgtaaaata aattttaaga gtagtaggat ttatagcacg cgacaaagcc  
20461 acataaaagct gtccgttttc aaaaatatga tcgatatcac atactaattt ttctatactc  
20521 ataccctgtg atttatgtat ggtaatagca taagctagtt taatgggaaa ttgacttaca  
20581 cttgcaagca cattgataaa ctttcattg ttgttttgct caagctcttc catgaaaaat  
20641 acatagggtt caagcatgat tttaacacca ttacttttca taataccaat ataagtttta  
20701 tcctcttcat aagtaatgct ttcaatgata ctttgctcgc cattgtaata tcccttatcc  
20761 caattattta cacaaaaaat aacgcgtgcg cctattttga tcttaagttc atctaaaata  
20821 tttaaacttt ttatccaagt ttgaatttta tgctcatcta tatctttgca ttctttacga  
20881 atttcagctt taaagcaaac aagcggactt tcaagcttgt ttaatctatc atcattgaca  
20941 gtatttacct ttttgtttat gctacaaagc aaggtataat catcatctaa ttcttcta  
21001 tcttttgat ttatacataa attttcaaaa aaatttaaaa ttttatcatc taaaaatcct  
21061 tgtctaataca aggataaatt tccataaaat tctaaattat gcgttctttt tggctgagtt  
21121 agtttgatat ttttaattt taattccttc caaaaaaagg aagaaaaagc ataagtagaa  
21181 tttgcaaaaa gattttcttt tttttcttta atcacgggcg gtaattgaaa aaaatcacc  
21241 acaactaaaa ttttaccatc aaattgcgaa ttttttaatc taaaacctat catctcaaaa  
21301 atatcagcac ttaccataga aatttcatcg atgataatca gatcaatttt ttttaagactt  
21361 tcttttaatt ttataaccct ttctctttgt ttttgattac gatcaaaaaac actaagcgtg  
21421 gtcatatctt gacaataacc caaacaacaaa aagctatgta gagttactcc tgctatatta  
21481 aatgccgaaa gcgctgtaga accaagagct acaacgatct tgccttgtct tttataagag  
21541 cgtatgagtt cattggttaa aaaacttttc ccaacacctg caccaccgct taaaaaaca  
21601 ttatcatagg ctaaaaattt ctctagttta tcaagcatta ttttcctta gctttaatta  
21661 taactacttt ttgtaaaagg ttgattatga aaatttggct atatccttgt cttgcaacat  
21721 tattttttac cgcttgctct ttgaaagaat cgggggttaa tccaacccg ccacagagta  
21781 tttcaaattt tgaatatcaa caagactcgc actatgcaaa actcgaattt gatcaaaata  
21841 tcagtgtttt atctaaaatg aatcaaaata taaattttga ttctcaaaaa tacaagcaac  
21901 atttttttag cccatggcac agctctttta aagctttaga gaatcaaaat cttttttggg  
21961 cattttcttt atatacaaat cctaaaaata tttattatth ctttaataag caagtaatac  
22021 ccttatcttg gtttgaaaaa accatagata atgcaaacac caaagaacta ggcaagctca  
22081 acaaaaaagc attaatata caaaatacc ttgttaaaaa tatccctacg caaagagtga  
22141 ttttaaaaaa tccttatctt gaaagcgaag gaattccctt tgattatgca agtgatagca  
22201 ttttaaatgc aggtactcct atcctagttt cgcatttttag caaggataaa cgctatgctt  
22261 ttgtattaag tgaagcagga gtaggtttta tagaaagtaa agatttagaa ttttttctg  
22321 acagcagggc acaattttat gaaaaactta actttcttac accttaaaaa gaaaaattag  
22381 ccattttaga tgaagatgga aattttttct ttgaaagcag aatcggagcg ctttatcctt  
22441 attataaaga agataaaaat tatttttacg gaaaaatagg ccctaaaaaa tacaagatat  
22501 ctaaagataa tgcaagtaaa tttcctctaa attttaatga tgaaaattta aaaaatcaaa  
22561 tttctgaagt tttaaattta ccttatggct ggggcgggta taatttcgaa agggattgct  
22621 ctttactcac tcgcatgctc ttttcagctt ttgggcttta tttgccaaga aattcagctg  
22681 cgcaaaaaaa ttcttttacg cattttgata taagcactct tgataattct caaaaaaag  
22741 atttcttaga tcgttttgga aaagcttatt taaatttact ctatttacct ggtcacataa  
22801 tgctttatgc aggaaaaatt tcagataaaa atgtcgtgt acacaatata tggggattaa  
22861 gaaaagatga aaccxaaaga ctgcttataa gctcagtggt tattactagt ttagagattg  
22921 gaaaagatga aatttcaaaa gaaaatttat tgctttcaag gcttaaggaa gtgagtttta  
22981 tttattttaa taaagaagaa aaagaacaaa ttacaaatta cttagaaaag ttaaaaaata  
23041 aagcagatta attttttaag ctctttatta aagagctttt taatttttca atcaataaat  
23101 ctttttgata aatcgctaaa atactctatg cgtctatcgc gtaaaaaagg ccaccaacga  
23161 cgtacatttt cacttctttc taaatcaata tccacaagct ttacgcattc attttcgcta  
23221 tctaaaatac aaatttcttc accttgtggc ccaaaaaaca aagaatttcc ccaaatctt

23281 atccccctctt ctacaccact tttgtcctct tcaaaaccca ctctattgac tgctacggta  
23341 tataaacctat tagcaatagc atgtcctttt tgaacccta gccaagcgcc aagttgtctt  
23401 tgtttttctt ctttttcac cttgtcaaac caaccaatag cagtaggata aatcagaatt  
23461 tgagctcctt ttaaagccat aagtctagcc gcttcaggat accactgatc ccaacaaaca  
23521 agtactccaa gctttcctaa acttgatatt ataggttcaa aaccCAAatc acctggggta  
23581 aatagaatt tttcataaaa acaaggatca tcaggatatat gcatcttgcg atatttgcct  
23641 gctatacttc catctttttc aaaaactaca gcagtattgt gataaagccc tgcgcttctt  
23701 ttttcaaaaa gtgaagtaag taaaactacg ccgtgcttct ttgctatact cgaccaaaac  
23761 tgcacatctt tttcataatc gtttgccaaa tcaaaaaatt ccacattttc actttgacaa  
23821 aaatactcac tttgatgaag ctctcctaaa caaacaagct cagctccttg cttagcagct  
23881 tgttcgataa attcgcaagt tttttctatg gttttttctt tagtagagtg aaatttttgt  
23941 tgaattagcg caattttcat tgtctttgcc tttcttgctt ttcacatca taaggatcta  
24001 ggtggatttg tatatcccat ttttcccat taaacatttc acgcacgcca ttttctatct  
24061 catctgaaac tttgtgtgcg cttaaaagcg aaattatagg acaaaacacc aatgaacgc  
24121 ttaaataatt acaatttggg gttttgctg tttttaactc atgataagaa acaacttcag  
24181 gattgctaga tatcaaagcg caaatttgac tgacttgctt tttaggcaaa gcttcacca  
24241 ttaaaaaagc taaagctttt ttaataattt taaaagcaga aaatgcagta taaagactta  
24301 caactatacc aaaaatcgca tcaataatat gcaattttgt aaaatagatc aaaaccaaag  
24361 ctgctaaggt gcaagcattg gttaaacagt ctgttttata atgcaaagca tcactttcta  
24421 taatcaaaact tttagttttt ttaaccacat aatttaaaaa aagcacaagt aaaaaagtaa  
24481 gtattaaagc aaagatcatt acataaatac ttgcatthaa attaataatt tcttctttgt  
24541 agtaaatttt taaaatactt tcataaaaaa taaaaatccc tactgatagc atgaaagcac  
24601 cttctaaaag tcccatcaaa gcttcgattt tggaaaaacc aaaattataa ttctcatttg  
24661 cttttgaga gcttttctt aaggctaaaa agttaaaagc cgatattgca aatccatca  
24721 aagaatcaat cgcacttgaa agcacagcca ctgagccact cgttaatccc accacaaatt  
24781 taatcaaaagc taacactatg gcacataaac tcgctataag tgttgctttt ttttgcaaat  
24841 tcatcttaag cccttgaaac ggttttgaca agagcagtgt aaagagccat tttggcgtaa  
24901 aaatactctt gcatctacgc ctataatctt gcgttttaggc aatgctttgg ccaatctttg  
24961 ctttataatt tcatcatttt catccttata aaaaggcata atcaaggcat catttcaaaa  
25021 aacaaaattt gcataagtag ctccaagtct tcttccttca taatataaag gctttggcaa  
25081 gggtaattct actaaatcaa accctgttgc ttcaagttct tttttcatct tttgcaaggg  
25141 tatataatgc tcatcttctt catcttcaca aatagaatat gctatagtat ttttatcgat  
25201 aatcttgcc aaagtatcga tatgatgatc tgtatcgtca cttttataa aaccattttc  
25261 tagccaaatg atttgcttta aacaaaaaat ttcttttaac cttgcctcaa tttggctttt  
25321 atccaaatga gaatttctgt tttcatttaa aagacaatta gaacttgtaa gcatcacacc  
25381 ttcgccatta aatcaatgc ttccaccctc taaaataaaa tctatttttg taagcttttc  
25441 gttaaatttt tctttgaaaa gtttagaatt tacttcatta tctaactcgc tttgaaattt  
25501 atttcccaa gcattaaaag taaaatcaag ggcttttaaa tgattgtctt ctaaaatc  
25561 aatagacca aatcacgta tccatgtatc attagtatcg catataaaaa attctacatt  
25621 tgtcatattt tcaaatggag caaagtcgct tttattcgga gcgataagca aaacctttg  
25681 aattcactt gttgccttaa caaatcctt ataagcctgt ataactctc ctaaataagg  
25741 cttccaatcg ctcttttcat gaggtaaaga aagcattaaa tattcttgct cactccattc  
25801 gggaattgat tttatcattt aactaccttt tttgataata aaattataat tgtatcattt  
25861 tttagctttt tgtcaagccg aagaaaaaca ctctatatt aggagtgtag tgtgttattt  
25921 aaagaatatt tccatctcac cgttattaag gattaattta ccatttttat ttgaaattgt  
25981 aaaacttctt ttaaaatttg aaagaaaggc attttcaaat tccataactt ctaaaggatg  
26041 gcaaagcatt tgagttgatg caacgcgatc tccttgaatt tctaaagtat tttcattgct  
26101 ttgataagaa ccaagaaac gattacatcc tgcataacca taaaatttat tattttcaaa  
26161 gctaataatt ggattttctt cagcattttt aggatcaaag gttttacat tgactacaat  
26221 tttatctatt tcaaaaagct gattttgcat aaattcattg ctgattttag aagttgattt  
26281 tgaatttaca gaagtgttag cgcaaccggc aaaaaaagct gcagctaaaa caatttgcaa  
26341 agtttttttc atatttttcc tttaaatttg aaattgactc aattcgcttt ctaaattatg  
26401 acacactatt tttaactcat ctgcgacttg aagtaaaatt ttagagattt cctcattttt  
26461 accgcttgcc tcaacatttt ctgcgatatg cataagtaaa ttttgaatat tttcttgcca

26521 aattttaatc ctctgagtac attgagtcac aagatTTTTT gaatcttgat tgcaaagttt  
26581 tacttcgttt gcactatTTG caagcaaagT ggtatTTTT ca ttgagtGaaa aaatactatg  
26641 agaattttcc ttaagttcct tagcaacttc ttgtatactc tctaagagtt ctttgattat  
26701 aagttctaca ttatgtaaaa attcctcact attgtttagct aaagttctaa tatcttcagc  
26761 aatgacagaa aaacccttac cataactacc tgctctagca gattctatgc cggcatttaa  
26821 ggataaaaga ttggTTTTat cgcctatTTT gctcatcatt tgtgtggcct tttgtatatt  
26881 ttgtgcatat ttaaccatat tttcaatTTT tagtgctaaa tcattttcat tttgtaccaa  
26941 atcactcact tttttatcaa tttcaagaag tgagtgtatc atctgatcca aaagctggta  
27001 agatttatca tttgctttat ttgcatcact agaaaggTTa gatatttcat ctaaaccgt  
27061 ccctatatca acacctagct taaagctaga atctatcttt tgatggctag aagttgaaat  
27121 ttcattaagt tctattgcat tagaatttaa agaagctt tgTTTTTcca cattTTTTTga  
27181 attaagactt gcgctgctta ctgTTTTTTg cgTTTTTTct ataaattggT taatatactc  
27241 gcatgcttta gcgatttcat cacgcccttt aactcgtatc ctagccctta agtttccgct  
27301 tccttTgtgct aattcttttag catgacttaa aagttccata ataggatttc ccacaactat  
27361 ttttaagcaca aaaagtacca ctataagcgt aaaaatcaaa gctatagtaa aaatcactat  
27421 ataagatctg ctcgTTTTTg caatatcttt ttctatgttt tctaaagaat gatatacatc  
27481 cataacacc aaaacactgc ccaaattTgc attagcatga caagctatac aactctcatc  
27541 tgcgatcaaa ggacggataa gccttaggtg attaatatta tcaagctttt gctctaaaga  
27601 gattaaatta gttgagtaa attgatctat aataagtttTg tcttTgtGaaa ttttaggatt  
27661 tttaatctca aagagctcta tggtttcttt tgaaggataa attttaatat cgctaattgcc  
27721 ctcaatcgtt ttagcatctt caatagcttc ttgaatTTTT tcaggatctc ctaaattcat  
27781 agccattctc atggtttgaa agacggaaga actaacagta tttaaattag atttgctcat  
27841 cttatctgcg gtatTTTTaa agtctaaatt taaaataaat tgcataGcaa taaaacttaa  
27901 caacaaaaca acaaaaattg ctgcagaaac tttaaaacct atagttctaa acatcttttt  
27961 ttctttcttt aagaatttat tttatTTTtac tttatTTTTg tttaaaatta tttaaataat  
28021 ataaattata tcttattTTa acacactcaa ttaatGtaaa aaatgtctca ctctgtaaa  
28081 ataaagcgct ataccgtact catttgcagc ttgtatcact tcatcatctc ttatgcttcc  
28141 acctggttct actatggcct taacccttac tttacttgct tcatctatgc tatctctaaa  
28201 aggaaaaaag gcttcgctag ctaaaacaca accttgtaaa tcaagacca tttcttgcgc  
28261 tttagcaata gctgcttttag ctgcatcaat cctacttgct ataccattc ctatggctac  
28321 catagcgcca ttttttcat aaacaacatt gtttgatttt gtaagagctg caactttcat  
28381 tgcaatctca agatcttgaa tttctgcttg acttgcttct ctttggctta caagcttggc  
28441 atttttaagc tcatcttcac ccacttcac gctatTTTga tatacaaagc ctccatctat  
28501 atgtttaaaa tcataactat caaaacttct aatcaaataa ggactctctt gagtaaagat  
28561 tttaatacgc tttttaccct caaatacagc caaagctttt tcatctacat ttgcagcgat  
28621 aatcacttct acataaattt cattgatctt atttgctaaa gcctcatcaa gggttccatt  
28681 tatagcaact actcctccat aagcacttat gctatcgcat tttaaagcat gtgtatagct  
28741 ttgactaaa ttttctttta tcgcaaaacc acaaggattt ccatgTTTTa caatagcaat  
28801 agcaggagcc ttatcaaaac tgcttgctag atttaaagct gcgttaatat cggtaagatt  
28861 attaaaactt gcctcgctt ttagggcctt aaaattggta ctaaaaaagg catcaaattc  
28921 atacaaagcg ctttttgat gtggattttc gccgtatTTT gtatcaaaaa ctttttgacc  
28981 tactataaat ttacttgctc caaagccatt attaaagcgc tcattcatat aatttgcaat  
29041 ataagaatca taatttgctg tatgctcgta agcttttatc atcaaattaa ggcgaaattt  
29101 ctcatcattt tcaccctttt ttaaaacttc aattgtcttt tcataatcaa gcggatcaca  
29161 aagcaccatc acatctttat aatttttagc cgcacttctt atcatcgag gaccgctat  
29221 atcgatattt tctatgattt catcaaaatc atctgtcatt atagtggctt ttttaaaagg  
29281 atataaattc acacaaacta aatcaatacc taaaattcca ttttcttttg cttgcttgat  
29341 atgattttca tcacttcttt tatgtaaaat tccgccgtga atttttgggt gcaaggtttt  
29401 tacgcgccct tcaaaaagct caggactttt tgtaaattca ctcaactcaa caacctttac  
29461 tccattttct ttttaagagt taaaagtacc gcccgttgaa agtagctcaa agcctagatt  
29521 ttcaagctct tttccgaatt ctactatacc tttttatca ctcacactta ataatgctct  
29581 catttttact cttttaaata cttttgtaat ttatcataat tcttttgcaa ttctacaat  
29641 tgattatgtg cttctttctt cttatgcggT ggcacaagat cagggtgaag ttgtcttgct  
29701 aattctttat aatgTTTTTt taaatTTTcc ttatttaattg tttcttTgtT taaatcaaag

29761 atttttaaca gtatatcaag ttcattttgt tgaaaattat ctagttgctc ttgttttaaaa  
29821 aatcctttac cttgtttttt ttcatatcct ttgttttgat ttagtatttt ataagctctc  
29881 atataaagca aactttctgt ttttttaaat aaaaaaatca ttcccaaact aacaatatta  
29941 atagcaatac aaattccaaa aatattaaaa atataattat aatttattct ttttatatta  
30001 gtaatttctt tataataacc actaaattga tgcgcaatta aattgataac atcaaaaata  
30061 aaaaatacaa taaataaaat agttagaagc gtcaccata ttaaagatag aaaaatttta  
30121 gtattccaag ataaatatat aaagactatt atactacatt ttataggata atatataaaa  
30181 gcctttgtaa aataatatgg tgcaaacata aaagtagcca aagaataacc aagaattttc  
30241 caaatattgt caattagcct agataaaatt gcttcagtga taaaaatgac aacattacca  
30301 ataagagcaa ttagccaagc acttataaaa aaaacaaaa tagccgcaac taaacttttt  
30361 ttatcaaac ctaaaaata taaaatttca cccaaaacac ctttaaagta atatgcttgc  
30421 tgtgcgataa tcaatcctcc agcaatacaa taacaaaaa cacaaatagc cattatagtg  
30481 acaattatac ccaaagtcac atacaaaaac gctttcattt tttttcctt atttttctaa  
30541 atgcttttta attttttcat aagcttcggt gattttttga aatttttcta cacctttttt  
30601 aagctcttct tcgctgacat tgtttgcatt taaaatatca gggtgatatt ttttagccaa  
30661 agctctatat tgttttttta ccgcttttaa atccgcatta tttgaaagct ctaaaatagc  
30721 ataagcctca tcaaggctta gttctttttt ggtacttttt aaatttgaaa tacttgcgat  
30781 aaaattatca agctcacttt ttgcaatatac aaaagctttt gcaatctgct ctaaaatttc  
30841 acgctttttt gcgctaaaat ctgcatcaac caaggccata aacacaagca cacgaagcac  
30901 attaaagcgt tcatttttcg gcaaaggaac ttcttttaaa aatccttttg ccacataaaa  
30961 agcatcgtgg atattttctt tgtgctcatt aaaacttgct tttaaaaaag ccctttctct  
31021 ttcacttttg gcgtttgcat ctaaaatttg gctgatcatt tccgcttcat tttcacttac  
31081 cctaccatca ctttttgcta tctttgccaa aagtgcgata acatagtaat tcatagcct  
31141 tttaaattca tctatcctct cttccataac tccacgagca aaacctttgg caaaacctt  
31201 ggctcctcgt gtagctgagt ttaaaaaatc ttgcttcccc caagttttat aataccaata  
31261 aaacaccaag atggttaaaa tgattaaaac aaaaatcatt gaatttgctc tttaaagcta  
31321 tcaaaataaa gcttattaag ctcatcttta cttaaattta tattatcaag tttaaaactt  
31381 tgttctttag tactaaaacc tagttttgta gcttttacac ccaattcttg tgttagcttt  
31441 aaaaatgctt cttcattttc tttatcaaga cctacgatgg cacggctagc actttcatca  
31501 aaaatcattt tttcatcact aaagccgcta tttaaatttg caccacgct agaaatagca  
31561 aacatttttg ctaaagtcac agcaatacca cctacgcca cgctattagc acattcaagt  
31621 aaggagtttt gatttgccat ataaagcaa ttccaaagtg caagttcagc cttataatca  
31681 agctctttta gatcgcctgc taccttttta tcttgtattt tcatagccat tgaagctgca  
31741 aattctccaa aactttcgcc taaaagataa ataatagtat tttctttttc aaaatttgct  
31801 tttagagttt tatttgcatc ttctaaaacg cccacattaa ctatagttgg acttggaat  
31861 atgctaacac cctcggtttc attataaagt gaaacattgc cacttactac aggagtgttt  
31921 aattctttac aagcttgttt aataccttca caacctgtg caaattgcca catcacttca  
31981 ggattttgag gattaccata atttaaaaca tcgctaactg ccaaaggttt tgcaccgctg  
32041 caagctactt ttctacctgc tgctgcgact gctaaagcgg ctccagtttt aggatttaca  
32101 taatttaaac gcgaattaca ttctatagcc attgctacac ttgcaccatt ttctttaatg  
32161 cgtatcacac tcgcacctaa agctccatct gcttttatgg tatttgtttg cacactagaa  
32221 tcaaactgat cataaataaa ggctttattg ttaatgtttt ctttttttag cattttttca  
32281 aaaagctctt gttgagacat tttgagcgtg aagctataat ctttaatttc atttaaatat  
32341 cttggctcgc ttacaggacg atctaaaatc ggtgcttttt cactcaaagg atcgataggt  
32401 ataagcccta caagctcatc atgcaaaaa agttccattt ttccagtatc agttacttca  
32461 cccataacca cagcgtccaa attccatttt ttaaagattt ctataacctt atcttcatag  
32521 ctttttttag cacaaattaa cattctttct tgagactcac taagcattaa ttcataaggc  
32581 gtcataccgc tttctcgcat aggagtttta tcaagataaa gcttcatacc actgccactt  
32641 cttcctgcca tttcaaaaga gcttgaagta agtcctgctg cacccatatac ttgaataccc  
32701 acaatataat ctgttttaaa aagctccaaa caagcttcca ttaaagttt ttcactgaaa  
32761 ggatcgccaa tttgaacagt aggccttaaa cttttacttt cttcattgaa gctatcgctt  
32821 gccattactg ctccacctaa cccatctcga cctgttttag agccacata aatcacagga  
32881 tttctatac cttcagcctt agcatagaaa atatcttcac ttttgcaaat acccaaagca  
32941 aaagcattga ctaaaatatt tccattaaaa cattcatcaa aagcacactc tccacctatg

33001 gttggcacac ccatgcaatt tccataatga gaaattccat ttacaacgcc tttacaaga  
33061 tatttttgat gtttgccaca tttctcatca tgaatatcgc caaatTTTTaa agaattaagc  
33121 cctgcaacta ctcttgccgc catagtaaaa acatcacgca aaatcccccc tactcctgtg  
33181 gctgcacccg caaaaggctc tataaaacta gggtgattgt gactttctac tttaaaaact  
33241 gctgccatgc cttgacctat atcaataacc cctgcatttt cacctggctc ttgaatcacc  
33301 caaggagcct tgggttgaaa accattgaga tattttttac tggatttata agaacagtgc  
33361 tcactccaca tcgcagaaat gacacctagc tcaagtaaat ttggctcagc ccctaaaatt  
33421 tctaataatct gctcatattc ttcacgcctt attttatgtg cttttattgt ttctttgtcc  
33481 atttttatcc tttcattttc ctaaacaana attaccaaac atttcatcta aaatttcatt  
33541 tctatcgaaa tctttagtaa attttgcaag ttcgccaata gctaaattta attcaaaggc  
33601 aaacaactct aaagaatctt cactgagtaa ttcttttagc cttaaaatag cctcgcttga  
33661 aattttgcaa gcattaataa gagcaataga actaactaaa aatccatcgc tatctagtga  
33721 atttaaataat ttttcaagct tttcttttaa aatttgaata tcgttttgaa cgctaagtcc  
33781 tataaaatca atatcacaag gcttatcaaa ttgagttttt aaatcgcttt tatttaaaag  
33841 ataaaaaatc tttttatcac tttgacttaa aagcttaaaa atattttcat cctcttcac  
33901 tttttttctt gaattatcaa aaatagccaa gataatatct gcacctcaa tactctttt  
33961 gctaagctct ataccgattt gctcgatttc atctttgctt tctcgaattc ctgcggtatc  
34021 gataatacgc aataaatgcg tacctagctt aaaactctct tctatgggat cagcagtcgt  
34081 tccagctata tcagaaacaa tggctctttt gtaagaaagt aaggcattta aaagagagga  
34141 ttttctaca ttaggcttac ctacaatagc aattttaaaa ccctctatca atccttttt  
34201 gctttctgaa agtgataaaa tttcttttaa aattttagaa ttttcttcgc acattgtgct  
34261 aatgtgctct aataaatcag aaggcaatc atcatcagca taatcaatac ttgtttctac  
34321 aaaagctaaa gtttttacc aatctgtgcg aattttatca agaagttcgc ctaaacttc  
34381 ttgcatattt cttgcgataa tctttgccgc atttgcagat tttgctaaga ttaaactctg  
34441 tatatttaa gcctttaag gactcatttt accctttaa caagctctt tactgaattc  
34501 tccaggttca gctaactctg cccccaagtt tatcaactct tcaagcaaaa tttcacttac  
34561 actaaatccg ccatgtactt gaaattcaac tatatcttcg cctgtaaaaac taaaaggggc  
34621 tttaaaataa atcacaatag cttcatcaag aaatcattt ttttgattaa aaagctttgt  
34681 aaaagttgca taacggggga aaagttcatt ttttttgatt aattttagag caaattcaag  
34741 cgctctttcc ccacttaatc ttataataga aatagaagcc actccatggg cagttgcaat  
34801 cgctactata gtatcattca tcttttttaa aaaaatcgtt aattacaaca tatctttgat  
34861 cgttgttttg tttaatgcct acatatttat ttggaaattc ggctcttaat ttttctaag  
34921 caattttaat caaaactcca tctaaaggct ttgtctgtcc tcttccattg attttaactt  
34981 tttcaatcac acctgaagg taaatgtgca ttccttgaat ttgattttct aaaaattgtg  
35041 caatccaag gcgaactaag agattgtatt taagattgat ccaattatgt aaaagataag  
35101 aatagcttt atagcgatga gcctctttgc cgattagtaa ggctgcatca tcaccatcta  
35161 aacgtataaa aacactttct tcatcataca ttcttaactc tactaaagag atattaaagc  
35221 aagttgattt taataaatgt tctagttgta tgcggatttc atctaaaata tcttcctat  
35281 tacgggtttc cctgctttct ttatgaaagc tatcaaaaat ttcacgcctt ttgacaacat  
35341 atttctctt aggtttaact tctctagtct ctgtctcaaa tcttttttta ttgtctattc  
35401 tatttttatc atcaaatttg cgataggttt tttcatgatt cttatgaata tcatttttat  
35461 gcgcattaaa atcttttcta gaatttttt tgctataagg ctgttttttg gctctagcct  
35521 caatgatagc atttttgcgc caaaaacca aaaatccatt ttttgaatgc tggatgattt  
35581 catattctaa atctataacc gagcactcaa gacttttaga agcttctgtt aatgcacttt  
35641 gaagatcttt tgcttcgatt ctcatTTTT actccgcttg ttttttatga tgctcttttg  
35701 caaacatctt attgattacc cattgttgta ccaaagaaca aagattgtta ataaaccaat  
35761 aaagggtgaa acctgctgga aaagtaataa agaaaaaggt aaaaatgata ggcaagaatt  
35821 tcatgatttt tgctgcata ggatcttgta tagtcatagg ggtaattaat tgctgtataa  
35881 acattgtcac acccatataa ataggcaaaa taaaataagg atccattact gataagtcac  
35941 gtatcaaaa tgcccaagga gcagctttta gctctatagc attgagcaat acacgataaa  
36001 tagcaaagaa aataggaatt tgtaaaagta taggcaaca tccgctcata ggatttgac  
36061 catgtttttt ataaagttcc atcatatgca tattcatttt ttgaggatcg cttttataac  
36121 gctctcttaa ttctttcatt ttagggtgca aatctttaag cttattcata gaaatcatag  
36181 atttataagt caatggaaat aagattatac gaataatcaa aaccattata acaatagccc

36241 aaccccaatt tcctatatga ttatgtaaaa aatttaaaaa ttcaaacata ggtttggcta  
36301 taaaagtaaa ccaaccatac tctacaacag cctcaagacg cggatctata gatcttaaaa  
36361 tcacatgttc tttagggcct atataaccac cagctttaa ttcattatca ctcattgcaa  
36421 ataccaaagg attatcctga gcatctttgc taatagtcac atttaaaggt ttatcaaaat  
36481 tgtaaaagaa agtggcataa tatctatcaa aggctgaagt catccaagca ttttttatat  
36541 tttcatcttt atccatatcg ccatcttcat aagtatggat ggtttcttga tcatccataa  
36601 ctaaagctcc atgaactgta tagctatcca ctgctatact tggacgataa cctggactta  
36661 taaaataaatt tatattttta cttaatttaa cttcaatadc ataattacct ttagaataaa  
36721 aagttatttt cttttcaaca agtaaactcg agagctgttg agtcagttt agcgtcttgc  
36781 taccattttc atcgataaaa agttcactca tatccgcagt ataaggcatg ctgaatgctt  
36841 gagcattaac agtaggatca ctaaagcgta tctctaaagg ataaggcaaa tttcccttgc  
36901 ttataagatt gataggctcg cttttatcat tttgatattt gtgatcttga agataaaaat  
36961 ttacgattct acctaaagaa tcaatctgtg cttcaaaatg ctcactttta atatcagcga  
37021 ttattttatc ttgaggtatt atattgctag ttgcagtcaa atttaaattt gcttgaacgc  
37081 tttgctgtgg cgcgttgata ttggttgcac tttgagaatc agcttgcgcg gtagtaatat  
37141 ttttctctaa atttatttgt tgtttaggta taaaaaata atcatataca aaaaaaata  
37201 aaaaagaaat aactacagcc aaaagaatgc gtttttgctg aaaaatatta ttcgaattat  
37261 tcacttattt gtcctttgaa agataatttt aacaagataa aagcttttat cttgatggtg  
37321 gggtatatat aaaaaataaa gctgtttttt cgccaaaaaa ataggcttaa aacataaatt  
37381 acaagaagtg atatttttag taatttttgg atagtcaaat cccctttta aaaaaggatt  
37441 gcattttaaa attctaaaaa aacttgaaaa aaatgcaaga atacaatttc tttttgaaa  
37501 ttgccaaaag gcgtattctg aacatgtggg ataatatcta caaacaggag gttttaaagg  
37561 gcttaaaaaat ttttgataaa agcgaagagt ttttaacat actattttta acattctagt  
37621 ttttttaatc cccatttttag attttttct aatctagaaa aaggaaattg agtgatttca  
37681 ctttttagcaa caaaaatata ttttccattt tgaagcttgt tttcaaattg agtaataaa  
37741 gctcttaaaa tacgttttga gcgatttcta atcactgctt ttccaacttt tttactagca  
37801 acaactgcc a ttttttgctc attattttta agataaaaaga tgataatgcc atcgcaatac  
37861 cactttttac ctgtcttata tacggctgaa aattcttctg tttcgtgaa tttaccaaaa  
37921 gttttcacac agcgagtctt tttctacct tagcgcgtct tgcgttgatc accttgcgac  
37981 catttttagt tttcatacga acgcgaaaac catgagtgcg ttttcttggga gtaccatgtg  
38041 gctgataagt tcttttcatt tcaattttcc ttaaaaaaat ataaaataag cttgtatttt  
38101 atcttaatct tacttataaa ttgcttttaa ttaagagtat tttttatttt attttgataa  
38161 atttgcaaaa tcaaatcaac aaaggaatat ttaaaaaatg ccaaaatttg aaatcgaat  
38221 actcaagcgt gaagaattgg atattttact tgaaatgatt agagaatttg cacaatacga  
38281 aaaaatggaa aattctttgc aatgctcaaa agaaaaactt gaaacttctt tatttgacaa  
38341 tcaatttgcc cgagcatttt tacttaaaga agatgaaaat atcatagggt atatgattha  
38401 tttttatacc ttttcatcct tttggggaag tgggtggaatt tatttagaag atatctatat  
38461 aagaaaaaat tttcgtaaaa aaggttatgg gcgagcagtt tttaaatttt tgggacaaat  
38521 atgcaaaaaa gagaatttaa aaagacttaa ttgggtttgt ttaaatagata atgttttggg  
38581 tataaatttt tatgaaagcc taaaggcaga gcatttaaaa caatggcgca attatcgctt  
38641 aagtggggaa aatttagaaa aactttgtga gttatgataa gaactttaca ctatctaaag  
38701 gccatgggtt atgattttac ggatgagaat ttaaaacgct attcaaaatt agaaaatttt  
38761 aaagatttaa gaaaaaatat ccaagaatgc actctgtgtc atttttcaa atcgcgttgc  
38821 tttacactca tggaaaaaga aatcaaaaat gcctctctta tgataattga tacgctagca  
38881 cataaaaatg aaaatgaaaa aggggttttg ttaaattcaa aaaaaggaga aagattaaag  
38941 ttttatctca aagaaatttt aggactttgc gagaaagaat tttatttttc gtatcttttt  
39001 aatgttttt ctaatggaaa atttgatgat ttttcgtac aatcttgcct gccatttttt  
39061 tggaatgaat tagaacttgt ccagcctaaa attattcttt gtttaggtga gtatcctttt  
39121 aaaagcttag gttttacaga ctttaacgct cttagagggg aaatctttgc ttataaaaat  
39181 ttctttataa tggcaagttt tgagcttga tttatagaaa aaaatccaag ctgtgaaaaa  
39241 ttttttatac aagattttaa aaaaatttaa ggatttttat gaagaaaaa ttcttaatct  
39301 tatgcttgtg ctttagcatt gtttttgcta aagagcaaaa attagtcgat gttaaacctg  
39361 ctgaaaattt ttatcaaaa ataagcacac aagaatgtga ctcaactgc ctactagaac  
39421 ttttagaggc aaggctttat cttagttttt tgagcgaatt tgtcgatcaa catgatcaat

```

39481 ttttatcaaa tatttatgcc aagcttttaa attctatcac agacttcgat aaaaatttac
39541 aaaaaattac ctctgtaaaa cttgctatta tcatacctga aaaaactata aaaagttact
39601 ctaataccat aatcaactca agtattgcct atcttttaag tcaaagggcg gagattaaag
39661 taaaggtttt ttttaaccggt acagaagatg gtgataaaat tcgttcaaca ctcgaacaag
39721 ttcaagcaca aggctatcaa tacgctattg ctgcactgac tcttaagggt gtaaatcaat
39781 taaaagatta ttcgggaaat atgaaaatth ttatccctac tcttcataaa aataatgttt
39841 ctttttcaaa ttttaacaaa aatataatth ttggaagcat agattacgat gctcaagtgt
39901 tagcactttt aaacaaagca aattccgata tagcggcttt tagcgatgga tctatgcttt
39961 cgagtaatth aaattctcgc gtacttgaac aaaatgcaaa tacaagatth tatcgtgttg
40021 agggagaaaa acttgattht tatagactct tacgctcgca aggcagthta aataatactt
40081 caatatttct caacactcct ttaatcaaaa cagcacttat aagctctcaa ttacgcgat
40141 ataacatcca accttttgta ctcttatcaa ctcaaatcaa ttataatcct acatttttaa
40201 gtcttactca agaaggggac cgtaaaaatt ttattcttgc aaattctatc gataatcacg
40261 atgataatth atcatatcta aatgaaatth ttaatcaaag catagattat aactggatag
40321 cgtatgctac gagtatagga acggattatt tttatactca atttttaaat actgaaagca
40381 atagtcttht tgatgaaaaa attcaaaaatt ctcaaattth atataaagtt cgcctcatga
40441 aaggaactaa agctagthtc gaagaatthaa aataattctt cgaaaagctt tttatthtct
40501 atatctatct tagcaggctt ctcatthtga atatacgcaa gggtaagthc aactthtaaaa
40561 agcaaaatct catctctata aatctcttgc gcaatatcaa ctgaagcatt tttatthtth
40621 aaaagctthg ttttaacctc tataatatca ccaagthtag ctgacttht aaaaaacaa
40681 tttgctthtgg ttaataaaaa atgtccctta ttagcatcaa aaatcggtgt atthttagca
40741 aaaaaaatht cacttcttgc tctthcgcaa aaththtaaat aattactatg atacactact
40801 cctccagcat ctgtatcttc ataatatatg cgtatthtca tthttagaatc cthtthgtcaa
40861 aaattcaatc aaaaactaat gtatcaaaaa atatgtthaa tthtthctaat tthtaacata
40921 tctaaatgaa atthtatcca taththaaaa gtaatcaagc cttacattat tataaaaaatt
40981 aaaatthaac tgcagthtth cthththaga tatctthgaag ctgccataca aaacaatctc
41041 aaagaagata agattcttht tgagaatctt accctaaaag cattggaaaa gtataththaa
41101 gaththtgagt gattctthth tctthtaatac cattthcttc agcaaththg agtatctthag
41161 ctctaagthc cthtgggaaa thtatctat aaatagcagg aathctthgga tcaaggagtht
41221 tatctaaata tcctctthth taaatccatt ccaatctthc aggtgthaaaa taataagggg
41281 cattagata gcctthgtgga ggagthgagg ctgagthtth ggcactthaat actaaagtht
41341 ctctatctaa agcagctthg tthtctactc atthctthgg agtatcthaca tcaaatctag
41401 thaccattcc atthtctgtht ccatccatag catcatcaaa thctthtcta cthtthcagaag
41461 tagaatccac atctctthgga tctththaat tacctthtthc aatatcthata tataaagccc
41521 aatgattctt acctctthca tcataggcaa aatcatatth atththaatca atcacccaat
41581 ctact

```

//

```

LOCUS          DMACINML_14                18874 bp    DNA        linear        16-DEC-2020
DEFINITION     Campylobacter species strain strain.
ACCESSION
VERSION
KEYWORDS       .
SOURCE         Campylobacter species
  ORGANISM     Campylobacter species
               Unclassified.
COMMENT        Annotated using prokka 1.13 from
               https://github.com/tseemann/prokka.
FEATURES       Location/Qualifiers
  source       1..18874
               /organism="Campylobacter species"
               /mol_type="genomic DNA"
               /strain="strain"
  gene         1732..2016
               /locus_tag="DMACINML_01721"

```



CDS 1732..2016  
 /locus\_tag="DMACINML\_01721"  
 /inference="ab initio prediction:Prodigal:2.6"  
 /inference="similar to AA sequence:RefSeq:ABS43803.1"  
 /note="conserved hypothetical protein"  
 /codon\_start=1  
 /transl\_table=11  
 /product="hypothetical protein"  
 /protein\_id="Prokka:DMACINML\_01721"  
 /translation="MFNYAKYENATQKELIYALSLVEKKAKKLALETKENKEALKFLQ  
 KKIRESLSTQKTKQKQSIPELDEAIEDYKNGNVETYANFEEYKKAMSAL"

gene 2006..2275  
 /locus\_tag="DMACINML\_01722"

CDS 2006..2275  
 /locus\_tag="DMACINML\_01722"  
 /inference="ab initio prediction:Prodigal:2.6"  
 /inference="similar to AA sequence:RefSeq:ADC29314.1"  
 /codon\_start=1  
 /transl\_table=11  
 /product="putative RelE/StbE family addiction module  
 toxin"  
 /protein\_id="Prokka:DMACINML\_01722"  
 /translation="MPYKIVLSKKYKQNYKKANKKDRILIDEVVEKLSNDEILES  
 KYKDHALKGNYIGFRECHIKPDLVVYRKIDEVLELYLANLGNHNSIF"

gene complement(3082..3522)  
 /locus\_tag="DMACINML\_01723"

CDS complement(3082..3522)  
 /locus\_tag="DMACINML\_01723"  
 /inference="ab initio prediction:Prodigal:2.6"  
 /codon\_start=1  
 /transl\_table=11  
 /product="hypothetical protein"  
 /protein\_id="Prokka:DMACINML\_01723"  
 /translation="MDKAVNIKLKIIFAVLVFLILANIGILFISKNEIFTKTLIGLIA  
 IAFILCYALAWIKTIKSIKKDSSKSGVKNLFIGILKLPYELVKVVLKIIKKIFSFFFG  
 LIDTWDDTVESMNDHEHMFDPFIGSDSIGELYTKNKKGKKVYF"

gene 4266..6767  
 /locus\_tag="DMACINML\_01724"

CDS 4266..6767  
 /locus\_tag="DMACINML\_01724"  
 /inference="ab initio prediction:Prodigal:2.6"  
 /codon\_start=1  
 /transl\_table=11  
 /product="hypothetical protein"  
 /protein\_id="Prokka:DMACINML\_01724"  
 /translation="MLYKNSNSMEEIIRGIYSGDAILFVGAGFSCGATGFKGELPIG  
 EELKNIICKLMDKPSNNKQDLSQIADFFLGNYCKDKPTKIKDFISQMKDIFTVTTVNS  
 YHITIASLPWRRITYTTNYDNVIEEAAKKKNKRIESKDLQDLENSVSMEDYYCLHINGR  
 IENLNEETLNKNFKLTSSSYISHETGVDTSWKRRFIDDIEISPLIIFIGYSLYDIAIE  
 KILFENNSSIKNKTIFIQRKDFDEIDKYKLEKYGIVYSMGVEEFAKLEKFSVSNIE  
 EEMYLKCFSELKLIKPLEPIREIEIEKFFMYGNITDDRMQDETIRQLGKPPFLIPRN  
 KIERALEIENNKVKILVVTGDIGNGKTIFLKQLAIKLVKKQVFTLKIKGNEASMKQ  
 DIDKIVKLNKNSIIVIDSYTRYTKVLEYIISQHYDDLIIILAARKYEHYRYLEENEYL  
 KSASEIEIDTLDDAELDYFYNIIEQGGMWYPSSKNIKPKYTKERKMRIMQCDCCKEIS"

```

LILVEILESEIMKNKIKKILENLFNSQINKKQVFAICLLNYMDIPISISLLEEIIGEHL
DLTIYKDNFKNIINLNLNTRDNEIFVKSPIFSLILKTCFANESTQYFLEILHLIMK
KLNDRGLLDEIRKNLFRFRFIERLLPSEGKIEKLLKYYEDLRREFKYLTDDPQYWLQY
AMCFIMHNDLKAQQKLYTAYEKAEKSNYDVTKIDNQARLFLKKASRTDINIEEAVD
LFFRANKLLTKQRNDTYKYKIMMDYKDFIDARFSSFNQEQWNIIMHCKKQLETLNFI
ISKDRFKEQKIYEDCKMIFEEIMQRNRAETIINSK"
gene      6810..6920
          /locus_tag="DMACINML_01725"
CDS      6810..6920
          /locus_tag="DMACINML_01725"
          /inference="ab initio prediction:Prodigal:2.6"
          /inference="similar to AA sequence:RefSeq:AON68871.1"
          /codon_start=1
          /transl_table=11
          /product="putative TraG protein"
          /protein_id="Prokka:DMACINML_01725"
          /translation="MIASNLEARGHALSDAISNSNMPQRALEVASSKGNI"
gene      7010..7339
          /locus_tag="DMACINML_01726"
CDS      7010..7339
          /locus_tag="DMACINML_01726"
          /inference="ab initio prediction:Prodigal:2.6"
          /inference="similar to AA sequence:RefSeq:CKG83280.1"
          /codon_start=1
          /transl_table=11
          /product="TraG-like protein"
          /protein_id="Prokka:DMACINML_01726"
          /translation="MKQAYNDIISGKVGISFGIGGELSANSQKSEAWYQNLKQKQK
FNKTFNESLSNEIGKSRNASASFNLLKGTGNVTNSASIKSSMDSYRLNNSVGYDRGST
IYSRLYQ"
gene      7299..7445
          /locus_tag="DMACINML_01727"
CDS      7299..7445
          /locus_tag="DMACINML_01727"
          /inference="ab initio prediction:Prodigal:2.6"
          /inference="similar to AA sequence:RefSeq:AON68871.1"
          /codon_start=1
          /transl_table=11
          /product="putative TraG protein"
          /protein_id="Prokka:DMACINML_01727"
          /translation="MIEVQLFIQGYINENYGGVVNKENVASAVNAVENMAARRDITLC
GNGF"
gene      complement(7733..8053)
          /locus_tag="DMACINML_01728"
CDS      complement(7733..8053)
          /locus_tag="DMACINML_01728"
          /inference="ab initio prediction:Prodigal:2.6"
          /inference="similar to AA sequence:RefSeq:SQE24169.1"
          /codon_start=1
          /transl_table=11
          /product="hypothetical protein"
          /protein_id="Prokka:DMACINML_01728"
          /translation="MDKAHLITYLISLAFIVSGLIVCCILYLFKDKINKITPDNIDNI
NSNVKDFIEKNICGGSLTIDRSFTTNFGDYSSISGNASSSTDYFIDPTYSYMPENIYH

```

gene NNQD"  
 8136..8354  
 /locus\_tag="DMACINML\_01729"  
 CDS 8136..8354  
 /locus\_tag="DMACINML\_01729"  
 /inference="ab initio prediction:Prodigal:2.6"  
 /codon\_start=1  
 /transl\_table=11  
 /product="hypothetical protein"  
 /protein\_id="Prokka:DMACINML\_01729"  
 /translation="MLILWGFKWISLPIGGNYFKKYNIGLKLPITKDFLLEESVSFE  
 HEYERCRVILIYNISQQYKTKSKISTR"  
 gene complement(9378..9809)  
 /locus\_tag="DMACINML\_01730"  
 CDS complement(9378..9809)  
 /locus\_tag="DMACINML\_01730"  
 /inference="ab initio prediction:Prodigal:2.6"  
 /inference="similar to AA sequence:RefSeq:CKG86054.1"  
 /codon\_start=1  
 /transl\_table=11  
 /product="hypothetical protein"  
 /protein\_id="Prokka:DMACINML\_01730"  
 /translation="MPKTDTKPNAKNRIHKAIETWFIKIYLNKIIHNAKDTSFINKS  
 SCLAFILSIYGKTEENKNKMPAVITHINTTKNNFATKLRVKNHENIVELQAKYPKL  
 DIISAYQFLTLKDKFKITKSEIQDFETLIDILSKNAQKSKK"  
 gene 10689..10820  
 /locus\_tag="DMACINML\_01731"  
 CDS 10689..10820  
 /locus\_tag="DMACINML\_01731"  
 /inference="ab initio prediction:Prodigal:2.6"  
 /codon\_start=1  
 /transl\_table=11  
 /product="hypothetical protein"  
 /protein\_id="Prokka:DMACINML\_01731"  
 /translation="MLNLNHFCLFVDSALEYFFVEKFTKILEQGLGKMKMKMKNEK"  
 gene complement(11136..11327)  
 /locus\_tag="DMACINML\_01732"  
 CDS complement(11136..11327)  
 /locus\_tag="DMACINML\_01732"  
 /inference="ab initio prediction:Prodigal:2.6"  
 /inference="similar to AA sequence:RefSeq:CKG86035.1"  
 /codon\_start=1  
 /transl\_table=11  
 /product="hypothetical protein"  
 /protein\_id="Prokka:DMACINML\_01732"  
 /translation="MPNNHDDIINIKEYKSTKYPLMPLEKRAAQFAPFSVLKGFDEAI  
 EKMKKEMEKKLEKSIYINE"  
 gene complement(11320..12798)  
 /locus\_tag="DMACINML\_01733"  
 CDS complement(11320..12798)  
 /locus\_tag="DMACINML\_01733"  
 /inference="ab initio prediction:Prodigal:2.6"  
 /inference="similar to AA sequence:RefSeq:ALW56291.1"  
 /codon\_start=1

```

/transl_table=11
/product="DNA methylase"
/protein_id="Prokka:DMACINML_01733"
/translation="MIQCSNMDNTRKYAAIDLKSFYASVECILRKLDPNTNLVVAD
ESRTEKTICLAVSPALRSYNISGRLRLFELIQKVKTNLERLKI AKYFSAKSYNHLEL
INPNLELDYIVAKPRMSAYIDYSSKIYSIYLKYFDPKDIHIYSIDEVFIDLTPYIRH
YKISADKLIENILFEILKTTQITATAGIGTNLYLAKIAMDILAKKQNI SKDGLCIGYL
DEMLYRRKLWQHTPINDFWRIGKGYATKLK SIGINNMGDLARYSLNNE DKLYQIFGVN
AELLIDHAWGFESCTMQAIKEYKSKHISKVMKVLPEPYSFKKARDILKEIIDH MVLE
LIEQNLTCNQIVLDIQYDKESLEKVQSYKGPMSKDSYGRSIPKNAHSTINLDYHTSSL
EAICNKGLELFDLIVNADFLIRKISLTLNNVVKNDTIKNFKEPNLFADIEQKENK NLI
KEEKLQKARLAIHVHYGKKSIFKASLENGLKINSQIGGHNA"
gene 13754..13924
/locus_tag="DMACINML_01734"
CDS 13754..13924
/locus_tag="DMACINML_01734"
/inference="ab initio prediction:Prodigal:2.6"
/inference="similar to AA sequence:RefSeq:AAW36306.1"
/codon_start=1
/transl_table=11
/product="DNA/RNA non-specific endonuclease"
/protein_id="Prokka:DMACINML_01734"
/translation="MSNITQNPQRIRNQIAIPSSYIKILKGENFKECYQVPNHEVEN
EHIRSYQVKCQN"
gene 14464..14577
/locus_tag="DMACINML_01735"
CDS 14464..14577
/locus_tag="DMACINML_01735"
/inference="ab initio prediction:Prodigal:2.6"
/codon_start=1
/transl_table=11
/product="hypothetical protein"
/protein_id="Prokka:DMACINML_01735"
/translation="MDGYDIAILIGAITLIFGTLALVAHYFNDKHTNETKS"
gene 15549..16229
/locus_tag="DMACINML_01736"
CDS 15549..16229
/locus_tag="DMACINML_01736"
/inference="ab initio prediction:Prodigal:2.6"
/inference="similar to AA sequence:RefSeq:ABS43400.1"
/codon_start=1
/transl_table=11
/product="ISHa1675 transposase B"
/protein_id="Prokka:DMACINML_01736"
/translation="MLSAVKYRIYPTKAQKELIHKHFGCVRVVCNHF LDYRQKQFSKG
IKETYFTMQKELTILKKQDEYKYLNECASQSLQMALRQLVTA FDNFFAKRAKYPNFKS
KKNARQGYAIPQNIKLDKVKVYIPKFTEGIKAKTHRKLDKDYI I KQAFISKIAD EYYI
AISYENNKSLPRPKVIGNAVGLDMSLSNLIIRSDCIIYKNHKFLQDKENKLIKLRQL
SKKTKRFRK"
gene 16471..16698
/locus_tag="DMACINML_01737"
CDS 16471..16698
/locus_tag="DMACINML_01737"
/inference="ab initio prediction:Prodigal:2.6"

```

```

/inference="similar to AA sequence:RefSeq:ABS43400.1"
/codon_start=1
/transl_table=11
/product="ISHa1675 transposase B"
/protein_id="Prokka:DMACINML_01737"
/translation="MQIDKFFPSSQICSNCGSNTGKKPLHIRSFTCPNCHTKHNRDLN
ANINIRNYALGIIDDRYKIKLDKSRIGITQS"
gene 16887..17132
      /gene="tdk"
CDS   16887..17132
      /locus_tag="DMACINML_01738"
      /gene="tdk"
      /locus_tag="DMACINML_01738"
      /EC_number="2.7.1.21"
      /inference="ab initio prediction:Prodigal:2.6"
      /inference="similar to AA sequence:RefSeq:ABS44011.1"
      /codon_start=1
      /transl_table=11
      /product="thymidine kinase"
      /protein_id="Prokka:DMACINML_01738"
      /translation="MEKIINLSRKEIFITVAGLINDVKGNAWDNVETLKSYPDEILY
LKADCDCGKESAIHFHIGDGGINNNYFVFCEECYKM"
gene 17193..17438
      /locus_tag="DMACINML_01739"
CDS   17193..17438
      /locus_tag="DMACINML_01739"
      /inference="ab initio prediction:Prodigal:2.6"
      /inference="similar to AA sequence:RefSeq:CKG85767.1"
      /codon_start=1
      /transl_table=11
      /product="hypothetical protein"
      /protein_id="Prokka:DMACINML_01739"
      /translation="MQRINLTLNNEASLMLDKLAKELKMSKTQILTDALKQMHENKRI
EQRKALWIKSF EAFKNDEEYQKEQLELAEAGVGDGII"
gene 17425..17796
      /locus_tag="DMACINML_01740"
CDS   17425..17796
      /locus_tag="DMACINML_01740"
      /inference="ab initio prediction:Prodigal:2.6"
      /inference="similar to AA sequence:RefSeq:ARJ53304.1"
      /codon_start=1
      /transl_table=11
      /product="growth inhibitor PemK"
      /protein_id="Prokka:DMACINML_01740"
      /translation="MVSSKIVKYGELWIADFEPQVGEEITKKRPALILSNLNFNSNQK
LVFVPLTTWQDKFYKGIWFLKIDKNATNNLNVDSAINCSQIKSFSKDRLLIEKIGEVD
EKIMKEVRIILDEILSPQFNS"
gene 17959..18318
      /locus_tag="DMACINML_01741"
CDS   17959..18318
      /locus_tag="DMACINML_01741"
      /inference="ab initio prediction:Prodigal:2.6"
      /inference="similar to AA sequence:RefSeq:ABS43547.1"
      /note="conserved hypothetical protein"

```

```

/codon_start=1
/transl_table=11
/product="hypothetical protein"
/protein_id="Prokka:DMACINML_01741"
/translation="MLTYTNELVVARLARALAYKEAKKDKSKVDFLINLFKKQIQNCI
KATEHFTDRVSQRFEENVDTLSVAISR AIRNTPPLQHGADYHQYLDKDSNIVVVLE
RQGEFGAVLVTTYKRGQ"
gene      18373..18567
          /locus_tag="DMACINML_01742"
CDS       18373..18567
          /locus_tag="DMACINML_01742"
          /inference="ab initio prediction:Prodigal:2.6"
          /codon_start=1
          /transl_table=11
          /product="hypothetical protein"
          /protein_id="Prokka:DMACINML_01742"
          /translation="MGIICMFGIFSLAYVLTIALTPDFEQFLAENQIKTVKILLINLA
ILLMKINALIFLEFFVIKKT"

```

ORIGIN

```

1  attttgatca tcttaagggt gtaatgacaa aaataat tttt agatagtggt ttttaagcctg
61  atgaatagaa aagattaata tgcgtaaaga tcaagaatat gcagaagaaa ggttttatgg
121 gcaaaaaaac tttcaaaaca tcttttaaaa gaaaaagata cagcaagtat ttataaaaat
181 atttatcttt gggatgaatg ggataaaaaa gatgggcaag attgtggtat agatttaatc
241 attcaaacia aagatgatga ctatattgca gtacaatgta aattttatga aagctcaaaa
301 gtagatttaa aagatttaag cacttat tttt agcaaattac aaagtggagt gggggagatt
361 aaatttagca aaggcattat cataagcact agcgatctca ctcaaaacgc taaaaaagaa
421 atagagcaaa tttcaaaaaa tatacctata gaattgataa ctttggaga ttttttaaac
481 tcaaataaaa ttttaaccag tcagtacttt agaattgcct attcctgctt ctactgatac
541 tcaaagcatt aaaaaagctt acgatatagc taaaaaagac aataaaagat tatcatcttt
601 tctacttatc aaagtgtaga aaaaattatg caattccaaa aacaaaacga tctagatgaa
661 atcgaactaa ttatttgcca tgaagctaac agaagtgtat ttttgggggtg acaggagata
721 tgaaaaagtg gattaagttt gtagatggca tttgtgcaaa aattacgaaa gcaaatat ttt
781 atagcaaaaa gttgctagtt gcaaatagta gaagttgtgg aattttaaat ttctttttaa
841 aagattctct cgaacataat atatttttca caaaaagaga tcggaaattc tattgaaact
901 aaagaaaagg aagcaagagc taaataaaaa cagagaatgt aatgggaaaa acgacaaata
961 gcaaccaaaag cggagaggca tacttaacaa tatgaagata tggctctgtt ccatggttaa
1021 catagagtat tttttataag ggtgtgtggt gatacgaacc acatagaaca tgaagattat
1081 aattatcgct aatgtcaagt tcgataatgt aaataatact cgaatccca aaggaattct
1141 gcttaagaag ttttaataaa cttcaaggaa atcttttctt ttttttgaga gagaggagga
1201 ggggggatta tttgcacctg agatttattt agattttgga ctttgataaa attacaagag
1261 aggtatctct tagaaaggat ataatat tttt aacaaaatta ttttagtaag agatcttgcg
1321 cgtgatgttg gagatgcgtt atttgctaag tggatagca ttagtaaggt taggtttggc
1381 aataaaccac agatataaaa agcaagatgg cactcaagca gaggggattt gtttatattg
1441 atgcaaatct ctttagtaga atagctgaag tggctaatac attctcaagt tctaattgaa
1501 gataatttct ggattgataa tgcaggggat aaatcatagt aagtattcta ttgccgtaga
1561 aagtatgtaa atgttaagta gtcaaatggg gtagaaacta atacttttgc taataataaa
1621 gctgttgtag aagcctctgt ggctcaata gattataaaa tatccacttc ttatgtgtaa
1681 aaaat taaat aatg ttttgggt ataatgat tgtcaaaaac aaggggtaaa tatgtttaat
1741 tatgctaaat atgaaaatgc tacgcaaaaa gaattaattt atgctctttc tttggttgaa
1801 aaaaaagcta aaaaacttgc attagaacaa aaagagaata aagaagcttt aaaat tttta
1861 caaaaaaaaa taagagaatc tcttagcacc caaaaaacaa acaaaaaaaaa gcaagcata
1921 cctgaacttg atgaagcgat tgaagattat aaaaatggaa atgtagaac ttatgctaat
1981 ttcgaagaat ataaaaaggc tatgagtgcc ttataaaatt gtattgtcta aaaaatacaa
2041 gcaaaattat aaaaaagcaa ataagaaaga tagaatatta attgacgaag ttgttgaaaa

```

2101 attatccaac gatgaaatcc tagaatcaaa atacaaagac catgcactaa aaggaaatta  
2161 tataggcttt agagaatgtc atataaaacc tgatttactt ttagtctatc gcaagataga  
2221 tgaagttctg gaattatatt tggcaaattt aggcaatcat aatagtatth ttttaattcat  
2281 taaaatcttg agcttattct atttttggtt aatgtggcaa agtggccaaa gcgtaatgta  
2341 tttcctaact ctttaacata cctaataaat tctttatcgc cagcagtctt atttagcctt  
2401 ttaatgcaaa ataacattga taaaattcat cataatattt atatacatta gcataaggctc  
2461 cactaccaat aggagccaaa gcacaacttc tgagtgcggt tgaaaaatct atttttttga  
2521 taaaataaaa ataggtatth tttcataaat agttatthtt tccattccta aaggaatctc  
2581 actaccctcg ctatthttcca gaaattctaa acactgthttg aaaatattgt aataatattg  
2641 atctatctca aaagataact cactgthttt aatthccttc tgcaaaatgt aaagctaact  
2701 ctatgthttgc cthtaattth ctactatcgt tggctcaata atgthttattg cthttgttcag  
2761 tagttggagg acgattattc atthttttaa aacattctat gatgttatta tgtaaagacg  
2821 aaaaaatcaa ttgaagctat ttgthttgcga tgcaagaata caattctaaa taagaactag  
2881 gcaaggthttg ttgaagttca ttaaatacct tcaaatthaat aatataagca agctaaatth  
2941 ggcttgctta taaatattgt taaaatata tthttgcttht tthttgtgga aatgtthaagt  
3001 atgtaataaa aatthgaaaa aatgthttgca agaatgataa ttagaataag ctagaattht  
3061 thctagcttht gtaaaagtta atthaaaaata aacctthttg cctthttttat tthttgtata  
3121 taactctcct atactatcag aaccaataaa agaaggatca aacatatgtt catcattcat  
3181 tgactcaact gtatcatcaa cccaagtatc tattaagcca aagaaaaaag aaaatattth  
3241 tthtataatc thtaaaacca cthtcaactaa ctcataaggt aatthtaaaa tacctataaa  
3301 aagatthttta actccactth tagagctatc tthtttaatg cthtttatag tthttatcca  
3361 agctaaagca taacataaaa tgaaagcaat cgctattaag cctataagtg tthttgtaaa  
3421 tthttcattc thactthata ataaaaatgcc tatatthtgc taaatcaata caaataatac  
3481 agcaaaaatg atthtttaatt thtatthttac tgctthtatcc atthgttattg cctthttgta  
3541 aaagataaaa thgaatccaa aatthgtaaag thtatagaaa atgccataaa aatthaatgac  
3601 atthaaaaatg caagthtcgac actthaagcaa ataaaaagcaa tgatgatgga thtaaaactt  
3661 gthtaaaacac ctaaagatac gctaaaaaaa aagthaaaaat tgtaattaat gataaataag  
3721 caactaaaac aaaaacttht thttattgatg aagthtttht tctagtatta thtttaatag  
3781 ctatataata aaaactthgaa atthaccaaaa ataacacaat aaagataaat aaagthaata  
3841 gtaaaaatgt taaatthtata ggctthtctt ataccacaaa agcatattht thtcaataag  
3901 cagthtttagt ctgctgatta gtggtaata tagcgacaca atthgaatata aatthcttata  
3961 aatggatta gagaatgaaa gagthtaatt taatctataa gtaataata agccctataa  
4021 gthgcaatat cthcttaatc atgtcattth tactcgtgta aaaattataa cthtaaaagg  
4081 thaatattc acatthttta gcaattagta atatgcaaga tcttgtaatt tatcggcata  
4141 atatagaata gthgctaaat thttaaacct ataatactaa aaaagthaat aaaaaatagt  
4201 tcaataataa atthtatgata taatattctg actthggaatt atcagaaata taaaatagga  
4261 gtatggthgtt gtataagaat gatagcaata gcatggaaga aataattaga ggaatatata  
4321 gcggagatgc tathttgtht gthggagcgg gthtttcttg tggthgctact ggatthtaagg  
4381 gggaattacc cattggcgaa gaatthaaaa atataatthg taaatthaatg gataaaccta  
4441 gtaataacaa gcaagattht tctcaaattg ctgattthtt thttgggaaat tathgtaaag  
4501 ataagccaac aaaaataaaa gatthttata gtcaaatgaa agatathttt actgthtcaa  
4561 cggtaaattc thtatcatata actattgctt cthttgcctg gagaagaatt tataccacta  
4621 attatgataa thgttatagaa gaggcggcta aaaagaagaa taagcgcac gaaagthaag  
4681 atthgcaaga thtagaaaat tctgcccgtta tggaagatta ctactgthttg cacatthaatg  
4741 gcagaataga aaatctthac gaagaaactt taaataaaaa thtttaagctt acatcttcat  
4801 cthtatthttc tcatgaaaca ggtgthtgata cthcatggaa acggcgttht atagatgata  
4861 thgaaatata accgctgatt atathttatt gatactcgtt thtatgatata gctatcgaaa  
4921 aatattatt thgaaaataat tcatcaataa aaaataaaac tathttttatt caacggaagg  
4981 atthttgatg aatagataaa tataaactthg aaaaatatgg aatagthttat tcaatgggtg  
5041 tagaagaatt thgcaaaatta atcgaaaagt thttctcttc thgtgaatatt gaagaagaaa  
5101 thtatctthaa atgthtttht gaactcaagc thattaagaa gccgctagaa ccaataaggg  
5161 aatagaaat agaaaaatth thttatgtat gcaatataac agatgataga atgcaagatg  
5221 aaacaatccg acaactthggg aaactcctt thttgattcc cagaaataag atthgaacgcg  
5281 cattagaaat tatagaaaat aataaagtha aatattggt agtaacggga gatattgga

5341 atggaaaaac tattttctta aaacaactag ctattaagct tgtcaagaaa ggacaagtgt  
5401 ttacccttaa aattaaagga aatgaagcta gtatgaagca agatattgat aaaattgtca  
5461 aacttaataa aaattctatt atcgtgatag attccttacac tagatatact aaggatttag  
5521 aatatattat atcgcaacat tatgacgatt taataattat tctcgcagca agaaaatagc  
5581 aacattatag atatttagaa gaaaatgagt atcttaaadc agcaagcgag atagagatag  
5641 atactttaga tgatgcagaa ttggactatt tttataatat tattgaacaa ggtggaatgt  
5701 ggtatccttc atcaaaaaat attaaaccaa aatatactaa agaacggaag atgagaataa  
5761 tgcaatgtga ttgcaagaaa gagatttctt taattttggt tgagatttta gagtcagaaa  
5821 taatgaaaaa taaaattaaa aaaatactcg aaaatctctt taatagccaa ataaacaaaa  
5881 aacaagtttt tgctatatgc ttacttaatt atatggatat cccaatatcg ataagcttgt  
5941 tggaggaaat tattggagaa catgatttaa caatatataa agatgaaaat ttcaaaaaata  
6001 ttataaattt aaacctaaca aatagagaca atgaaatctt tgttaagtct ccaatttttt  
6061 cattgttgat actaaaaaca tgttttgcca atgaaagtac tcaatatttt ttagagattt  
6121 tacatcttat tatgaaaaag ttaaataagag atggattgct tgatgaaatt agaaaaaatt  
6181 tatttaggtt tagatttata gaaagattgt tgcctagtga aggaaagatt gaaaaactta  
6241 agaagtatta tgaagattta agacgagagt ttaaataatct aactgatgat cctcaatatt  
6301 ggttacaata tgcaatgtgt ttcataatgc ataacgatct agataaagca caacaaaaac  
6361 tttatactgc atatgagaaa gcagaaaaat ctaattatga tgtaacaaaa attgacaatc  
6421 agcaagctag actatttctt aaaaaagctt caaggactga tatcaatatt gaagaagctg  
6481 tcgacttggt ttttagagca aataagctct taacgaaaca aagaaacgat acatataaat  
6541 ataagataat gatggactat aaagatttta ttgatgcaag atttagttca tttaaccaag  
6601 agcaatggaa tcaaattatc atgcattgca aaaaacaact agaaactcta aattttatta  
6661 tatcaaaaga tcgcttcaag gaacagaaga tttatgagga ttgtaaaatg atatttgaag  
6721 aaattatgca gagaaataga gcggaaacta ttattaattc aaaatgaatc tcaataggca  
6781 acgcttctat taaaggattc aatgtgggta tgattgcaag caatttggaa gctagaggac  
6841 atgctttaag cgatgctatt tcaaattcta acatgcctca aagagcttta gaagttgcta  
6901 gtagtaaagg aaatatttag ctttaacatt tgaaaacgat agaagctcta ttgctaatgc  
6961 aacgcaacgt gcttttagtta atgcttattc taaagcaaca ggtgtggatg tgaacaagc  
7021 ttataatgat attataagtg gaaaagttgg aattagtttc ggtattggtg gggaattatc  
7081 tgcgaattct caaaaatctg aagcttggtg tcaaaattta agcaaggatc aaaaagaac  
7141 cttaataaaa actttcaatg aaagtctttc aaatgaaatc ggaaaaagca gaaatgcaag  
7201 tgcttcattt agcaatttac ttaaaacagg aaatgttaca aattctgcta gtattaaaag  
7261 ctctatggat agttatagac tcaataattc agtgggttat gatagaggtt caactattta  
7321 ttcaaggtta tatcaatgaa aattatggtg gcgtagttaa taaagaaaat gtggcttctg  
7381 ctgtgaatgc tgttgaaaat atggctgcaa ggagagatat cacactatgc gggaaatggat  
7441 tctaattgca attcaaatgg attacatgag caaacaagc acaattgtca tgatccaaga  
7501 ggtgttatga ctgatcacia taaagccata gatgatttaa atttaagaca taaaggcttt  
7561 atggcaacaa gaaatgctcc tcaggaattg ctaccgagga aaaaaataat aagattgatt  
7621 atgctagcgt acaaaaagat attaaagatg gaaaagctga cattaacaaa gccatagatt  
7681 ttggtagcca aaatagaaac atgtaaaatc gagtctagct ttttagctag acttagtctt  
7741 gattattatg gtatatattt tctggcatat agctatatgt tggatctata aaataatctg  
7801 ttgatgagct agcattgcct gatatagatg agtagtcgc aaaatttgtc gtaaacgagc  
7861 gatctattgt taatgaaccg ccacaaatat ttttttcaat aaaatcttta acatttgaat  
7921 ttatattatc tatattatca ggtgttattt tattttttt atctttgaat aagtataaaa  
7981 tacaacaaac tattaaaccg cttacaataa atgcaagact tattaaataa gtgattaagt  
8041 gtgctttatc cattgtcatt cttttcatat taacttattt atataacata attatattat  
8101 attttaataa atttttgtaa gtattttgct atcaaatgct ttttttatgg ggttttaaat  
8161 ggatttcttt gccaatgggt ggcaattatt ttaaaaaata caacattgga ttgaaacttc  
8221 aacctattac taaagatttc ctcctagaag aatctgtttc atttgagcat gagtatgaaa  
8281 ggtgtcgtgt aattatttta tacaatatat cacaacaata taaaaaact aaaagcaaaa  
8341 taagcacaag ataaatacaa ttttaatttca atgatattgc aaggtaaata caagttatta  
8401 caagtcaact acaagtcaac tatacaaaat gttatttaca tacattgcaa gttgttttca  
8461 agtaatatac aattttattt caattataat acacattaat acaactaac tataaaattt  
8521 ttatcgtaaa atacaacttg actacaagtt tagtttatgt ttgtgtgatt cttatttcag



8581 gctgattaca cttttactac aaaaatgtat aatTTTTgaa ctcaagttga tattaagcg  
8641 tagttatcag cactccaaat acaatTTTTat tgcgtattaa ctacaagttg attacaagtt  
8701 tattgcaggt tgattgcaag tttattacac ataaaaaatt atctaaaatg ctatTTTTatg  
8761 ggatttcttt gtgttaatat ttttttaaa gatgaaaatc atctttaaaa agtghtaataa  
8821 aaaaataaaa tatcaacatt catggcttat tatgttaaaa cccttatttt taggctcttt  
8881 tgctTTTTgt gaaaaaatg taaaaagttg agccaatggg cataatgcaa gagcagagtc  
8941 taaatatagg catttaaagc ttattattgc gggcaaataa ccatcaatgt tttaccgaca  
9001 ttttgcgatc tgtaaaaagc ttttaaaata tctatTTTTct aggtgattgc cattattgat  
9061 tatcaagtta tcatgtaata ttttggcaaa aatagacttt gtagccaaaa actgcaaaaat  
9121 tttctttatg gcgtgtgttt ttgattgtgc ttgatttata gcgataatat gagagctagg  
9181 gctgatttta gaagttctag cgaatTTTca aaactgcggt gcaatTTTTga aatgtgctgt  
9241 ggTTTTgtt ttgggttaat ttttgcgggt ttttttgatt ttatgtgtgc atcttgagtg  
9301 gatatagtgt ttaaaatcac agaattagcc cttaaaaggc taaaagggtt tttttaatgg  
9361 tatttatcgt cttagggtta cttttttgat ttttggcgt tttttgaaag aatatcgatt  
9421 aatgtttcga aatcttgaat ttctgatttg gtaatTTTga atttatcttt gagggttagg  
9481 aattgatagg ctgatattat atcaagcttt ggatatttgg cttgtagctc gacaatgttt  
9541 tcgtggTTTT taactctttt tagcttggta gcgaaattgt ttttggtagt gtttatgtgg  
9601 gtgataacag cgggtgtcat tttgtTTTTg ttttcttcgg ttttgcgta gattgagagt  
9661 atgaatgcta ggcaactgct tttgttgatg aagatgctag tgtctttggc gttgtgaatt  
9721 attttgttca agtagatttt aataaaccaa gtttctatgg ctttgtgtat tctggtTTTT  
9781 gcgtttgggt ttgtatctgt cttaggcatt aatgctccta tggatttggg ggttttgtgg  
9841 agttaaaccg tatttttatt aaacttgggt actaaatgag tgtttttata tgtggggtat  
9901 agtttatatc aaaagtggct aaaaataaac aggtatttag gatcgaaata gtggcgagaa  
9961 aaggaataaa tgaggtgaag aatgagggga taaatgaggg aataaatgga gggaaagggc  
10021 tattgtaacg ggctattgta agaagcttgt aggtatgtga tcgagatgag aagatggatt  
10081 ttgcttatgg ggctaaggaa agtgtgatga gaatcgaggg gataaatgag ggaaactttc  
10141 aagaaaaatg tgtctaattc gaagaggggg ataaatgagg tgataaaggg cgagaagaag  
10201 acttttctat ttcaggggct aaaaatgctt tgggttaggt acaaaaatgg caatattatt  
10261 aacgaagtta atgaatgtta ggtacaaaaa ttttttgggt gcaatattta aaaaaagac  
10321 aaatcgcaat aaatcgcgct gaaacgacta tgaaatgggc attctctact ttagcttggg  
10381 tacaaaaatg cccatgctta aacttggact ttttaatgct taatttaaaa ttaaagtccc  
10441 taaaaatggg cattctctac ttttagcttgg gtacaaaaat gcccatgctt aaacttggac  
10501 tttttaatgc ttaatttaaa attaaagtcc ctaaaaatag gcattcccta ctttagctta  
10561 ggtacaaaaa tgcccatgct taaacttggg ctttttaata ctttaattta aattaaagtc  
10621 ctaaaaaata ggcattctct acttttagctt aggtacaaaa atgccatgct ttaaacttgg  
10681 actttttaat gcttaattta aaccattttt gtcttttcgt agattcagct ttagagtatt  
10741 tttttgttga aaaatttaca aaaattttag agcaaggatt gggtaaaaaa atgaaaatga  
10801 aaatgaaaaa tgaaaaatga taggtaaaaa aaccaaaaaa aataaatcaa aataaatgta  
10861 gttttgctct aatTTTctct ttgattTTTT gtcacaaaaa agtacaagat atTTTTttgt  
10921 tttttaatg atataaaaa caatattttt ttatatgaaa attcacagaa aaaaaagata  
10981 aatTTtgaca caaattttga ttgattttat tttgagctaa aatatataga taaaaatagt  
11041 gtaaaaaaaa atacactata aaaaaatact cttttttttt acttgttttt aattgatttt  
11101 tataatctaaa atattttttc ttataaaaaa catgattact cgtttatata aatggacttc  
11161 tcaagctttt tttccatttc ttttttcatt ttttcaattg cttcatcaaa tcttttaagc  
11221 actgaaaatg gagcaactg tgccgctctt ttttctaag gcataagagg atatttagta  
11281 gattttttgt atttaatat aataatatca tctgtggttat taggcattat gtcctctat  
11341 ttgcaatta atttttaagc cattttcaag actcgaggct ttaaaaaatag atTTTTttcc  
11401 gtatttgtga acgatcgcaa gtctagcttt ttgtaatttc tcctctttta taagattttt  
11461 attttcttc tgttctatgt cggcaaaaag attgggttct ttaaaatttt ttattgtgtc  
11521 attttttaca acattattaa gagtaagact tatttttcta attaaaaaat cagcattaac  
11581 tattaatca aacaattcta aacctttatt gcaaatagct tccaaggaag aggtatggta  
11641 atccaaattg attgttgaat gtgcattttt tggaatagat cttccataag aatctttact  
11701 cattggacc ttgtagcttt gtaccttctc taagctttct ttgtcatatt gtatatctaa  
11761 aacaatttga ttgcatgtta aatTTTgctc aattagctca agaaccatat gatcgatgat

11821 ttctttaagt atatctctag cttttttaaa actataaggc tcaggcaaaa ccttagccat  
11881 taccttagag atatgtttgc ttttatattc ttttaatagct tgcattgtac agctttcaaa  
11941 tccccaagcg tgatcgatta ataactcagc atttactcca aaaatttgat aaagttttatc  
12001 ctcgttatta agagagtatc ttgctaaatc tcccatattg ttaatgccta tgcttttttag  
12061 ttttgttgca tatcctttgc ctatacgcca aaaatcattt atgggtgtgt gttgccataa  
12121 ttttcttcta taaagcattt catctaaata cccgatgcaa agtccgtctt tgctaataatt  
12181 ttgttttttg gctaataatat ccattgcaat ttttgctaag taaagatttg ttcctattcc  
12241 tgcagttgct gttattttgag ttgtttttaa aatctcaaat aatataattt caattagttt  
12301 gtcagcagat atcttataat gtctgatata aggagttaa tcaataaata cttcatcaat  
12361 ggagtaaata tgaatgtctt ttggatcaaa atactttaaa taaatactgt agattttaga  
12421 actatagtct atatatgctg acatcctagg ttttgcaaca atgtaatcaa gttctaaatt  
12481 aggattattt attagttcaa gatgattgta tgattttgca ctgaaatatt tagcaatttt  
12541 taagcgctct aaattaattg tttttacttt ttgtattaac tcaaatagtc ttaatctgcc  
12601 tgatatatta taagatctta atgcaggaga taccgcaaga catattgttt tttcagttct  
12661 actttcatcc gcaactacaa gattgggtatt tagaggatct aattttctta aaatgcattc  
12721 aacagaagca taaaatgact taagatctat agctgcatat tttcgcgtat tatccatatt  
12781 ttcactacat tgtatcattt gcatataata attatttttt taattgtata aaaagaattt  
12841 taatagacta agattgttat ttttttttag ttcttgtttt ataattaatc aataaaacag  
12901 tcaagcttgt agattttttc atctaagaat tttatcaaaa accatgcttt gtttaaaatt  
12961 ttatagtatt caaagaggct atttaataatt gtgcttatat atatttaaat caagctagca  
13021 aagcatacgg aaaagattta tatcgagttt aatttttaaat gataaaattt aagctgaaat  
13081 gataaagctt ttttgaaaat gctgattgta ataaaaagtt acattaatat aggcaaatga  
13141 aattttctac tattttttgt caataataat tgctgttgat aaaataaaaa tctaccttat  
13201 tttatataatg gaaaatctca aaatctttat cactcatttc atttttcgct acttaagaaa  
13261 aaatggaact gttataataa tgagcttggt ttttatataa atcataaacc aaaataccaa  
13321 taaattaaaa aaagaaagag aaaattagtt gaaaaataaa tcaagaatta atttttaaaa  
13381 agataggaga ataaatgaaa aaaattataa tcttaccata gccttagctg attatacaca  
13441 atacaagcca agcgaagatt ttgctaagta ttttactaag caaagttgtt cacaagtttt  
13501 agataaattc tattatctaa attgttatga ttataatcta aaaggcacia aagctgtagc  
13561 ttatagatta gaagcggaaa atttaaaagg cgaacaaatc aaaaaacgcc cacgctttga  
13621 agatgataca aatattccta aaaaatatcg cactacatgg agtgattata gaaacagtgg  
13681 ttatgataga ggacacactc tttctaagtc ttcaatgaga aaaacaactc aagctcaaag  
13741 aagcactttt ttaatgagta atattactcc acaaaatcca caaagaataa gaaatcaaat  
13801 tgccattcca agctcttata ttaaaatctt aaaaggtgag aattttaaag aatgttatca  
13861 agtgccaaac catgaagttg aaaacgagca tataagatct tatcaggtta aatgtcaaaa  
13921 ttaaaccacc ttcctcacta aaggtggatt ttaatattat ataaagtact gtcaattaaa  
13981 aaataatcct aacaatgtgt attttaaaac acttaaatth tatttagaaa acattattgc  
14041 tattaataaa taaagaataa aaataaggat aatactttat atcggctttt gtaatatcgg  
14101 ttgtttact tgtgaaattt tataattttg ataaaaataa aaattaatct gttctggagg  
14161 ttttaatcct tagatacatg tttatacccc ttgactttta gcattttttt gttataagat  
14221 aaggagaaga aatatgaaag attttttcaa aaaactatcg atatttacia aaataccac  
14281 aaaagcaatc ttaagattca tggaatctat tgcgtaggat tatttgtaaa tagtctttat  
14341 ggtttgcaaa tgggaatagt agagctttta ttattctcat cgaaagtttg ctaattttgg  
14401 caatagttgc gctattatcg atctttctta aggactgatc tttttttgaa aaaaggagag  
14461 agaatggacg gctatgatat agctattttta atcgggtgcta tcactcttat ttttggta  
14521 ttggcttttag tagctcacta ttttaacgac aaacatacta acgaaactaa aagctaattt  
14581 ttagctttta gcttaacacg ccctataagt tgggaataga tttttttatt cccttcttgg  
14641 gcaatataaa tttctattcc ttttttattt aaaaatacaa aaaaggacat aacaaagaat  
14701 acaaaaatca caaacactca aatcaagct gttagcactt cattcacaca agaaaaaatt  
14761 gaactgatca aaaaacactt ctttcttgac aatgctacia ttgctgaaat ggaatattgt  
14821 ctaaataattg ctaacaggtta caatttagat ctgtttttta atctatttaa acagaaatcc  
14881 caactgcttt agcggttggg ctgaatgcca acgagcttag cgagttttat ctttgattgt  
14941 ttcagggttt gcttcgccta cactacaagc aaaaaatcca tcggtctaaa aagtcttttt  
15001 ttttaaaata ttgttttaga aatggctgaa atcccttgtc ttttcaaca taaaaagtag

15061 ttatttgttt tatcttttag acaatatagc ttatactaac tcttagtaag tattgtatta  
15121 ttaaatagat atggctctata tcgctttcca tagctaagat tataaattct ccattctcac  
15181 ttatttcac aatttttagct tttataaaat tattcaaac accttttaga agtttctttc  
15241 tatatttaaa aactaaaatt atatgtattt ttagattgtg cttagagcga tttgtagaga  
15301 tataatccatg tagttcacia ttattctttt ttattgtagt tcacaattat tcttttttat  
15361 tgtagttcac aattattcctt ttttattgta gttcacaatt attctttttt attgtagttc  
15421 acaattattc ttttttattg tagttcacia ttattctttt ttattgtagt tcataattat  
15481 tctttttcat ttttatattc acatttatat ttttatgtta ttaacataaa aacaaggaat  
15541 actaaacttt gctaagtgtc gtaaagtata gaacttatcc tacaaaagct caaaaagaat  
15601 taatccataa acactttggc tgtgttagag tagtttgtaa tcatttctta gattatcgcc  
15661 aaaaacaatt tagtaaaggc ataaaagaaa catactttac tatgcaaaaa gagcttacta  
15721 ttctaaaaaa gcaagatgaa tataaatatc ttaatgagtg tgcttcacaa tctttacaaa  
15781 tggctttaag acaattagtt actgcctttg ataatttctt tgctaaaaga gcaaaatattc  
15841 caaatttcaa gtcaaagaaa aacgcaaggc aaggttatgc tattccacaa aatattaagc  
15901 tagatgataa aaaagtttat attccaaaat tcacagaagg cattaagctt aaaaccata  
15961 gaaagcttga taaggattac ataataaaac aagcctttat ttctaaaata gccgacgaat  
16021 actacattgc aattagctat gaaaacaata aatctttacc taggccgaaa gtaataggaa  
16081 atgctgttgg tttagatatg agtttatcaa atcttattat tagaagtgat tgcataattt  
16141 ataaaaatca caaattctta caagataaag aaaataaact cataaaactt caaagacaac  
16201 ttagtaaaaa acaaaaaagg ttcaataaat cgtgcaaagg ctaagctaaa agtagctaaa  
16261 gctcatcaaa aaattacaag agcaagagat gattatttac ataagataag cgatgaaatc  
16321 acaaatttat atgattttat agctgttgaa aatctaaata ttaaagaact aattaaaac  
16381 aaacacttat ctaaacttat tgctaattgct agttggggta aatttatcaa tttgctaact  
16441 tataaagccg aaaacaaagg taagacatta atgcaaattg ataaaatttt ccctagctct  
16501 caaatatgta gcaattgcgg aagtaataca ggtaaaaaac cactgcatat tagaagcttt  
16561 acttgcctta attgtcatac taaacataat agggacttaa atgctaatat caatataaga  
16621 aattatgcac taggtattat tgatgataga tataagataa aattagataa atctaggata  
16681 ggaattacc aaagttaagc ttgtggagat agctctagcg ggggtgcaaa atatggttac  
16741 aacttgata ctagctatct atcgatgaaa caagaagccc acttgcttta gcagggtgggc  
16801 gattcacttt tggaaatgaa aacacaagtt tagattcata tagctttatc tttgtagatg  
16861 aaatacaatt tttcaagaaa gattttttgg aaaaaattat taatctttca agaaaaaaag  
16921 aatattttat aacagttgca ggcttaatta atgatgtaaa aggaaatgct tgggataatg  
16981 tggaaacact aaaatcttat gcagatgaaa ttttatattt aaaagcagat tgtgattggt  
17041 gtggcaaaaa ggaaagcgca atttttcata taggcgatgg tggattaat aataactact  
17101 ttgttttttg tgaagagtgc tataaaatgt agtttatttt gcacataatt tgtgttataa  
17161 tttgtgtata aaattacacg caaggaaaac acatgcaaag aattaattta actctcaaca  
17221 atgaggcaag cttaatgctt gataaattag caaaggaact aaaaatgagt aaaactcaga  
17281 ttttaacaga cgcattaaag caaatgcacg aaaataaaag aatagagcaa agaaaggctt  
17341 tatggataaa aagctttgaa gcatttaaaa atgatgaaga gtacaaaag gaacaacttg  
17401 aactgcaga agcaggagtg ggtgatggta tcatctaaaa ttgttaataa tggcgaactt  
17461 tggattgctg attttgaacc acaagtaggc gaagaaatta ctaaaaaacg ccctgcattg  
17521 attttaagca ataactttt taattctaatt caaaaacttg tttttgttgt gcctttaaca  
17581 acttggcaag ataaattcta taaaggaatt tggtttttaa agattgacaa gaatgctaca  
17641 aacaatttaa atgtagactc agccataaat tgttctcaaa taaagtctt ttcaaaagat  
17701 agattaattg aaaaaatagg tgaagttgat gaaaagatta tgaagaagt caggataata  
17761 cttgatgaaa tcttaagtcc acaattcaac tcttaatttc tactttttac actacaacta  
17821 cacaacacia tgttcattat tgaatatgt tgatataaga atgtagtgct tacttaaac  
17881 tcgccttttag gggatgcttt tattccctaa agggattatt agtatctctt attggctaatt  
17941 caattaggag atgcaaaaat gttacttat acaaacgagc ttgtttagtc taggcttgca  
18001 agagctttag ctataaaga agctaaaaaa gacaagagca aagttgattt ttaataaat  
18061 cttttcaaga acaaatcca aaactgcatt aaagcgacag agcattttac agatcgtgta  
18121 tcacaaagat ttgaagaagt cgaaaatgat acattatcag ttgctatttc aagagctatt  
18181 agaaacacc cacctttaca gcatgggtgcc gactatcacc aaaaatatct tgataaagat  
18241 agcaatattg ttgtcgttct tgaagacaaa ggtgagtttg gagcggtttt agttaccaca

```

18301 tataaaagag gacaataaaa tttgctttct gatgaagaat tagctgatct taaaaaaaaag
18361 aggagttttg taatgggcat aatatgtatg tttgggatat ttagtttggc ttatgtttta
18421 actatcgctt taacgcctga ttttgaacag tttttagcgg aaaatcaaat taaaacagtc
18481 aagattttgc tgataaattt agcgatactc ttgatgaaaa tcaatgcttt gattttccta
18541 gaattctttg ttataaagaa aacttaaaaa acacaccttt tgaggattac gataatgaat
18601 actttgtatt tattccacaa aacaaaaata tcaatttcga tagtctaagt tatgctacta
18661 gcactttaa gcttttaaac caaaaagaac ttttaattga gactatgaaa taaagattga
18721 agaaggtgaa atcaaataca ttagcgaact aattcctatt atttttgaag gaaagatagg
18781 caaagatgca ataaactttt aaagagaaat aggctgtcat actttcaaac ataatagaat
18841 agcaagaata gtattagtgg atatttgc atata

```

//

LOCUS DMACINML\_15 17241 bp DNA linear 16-DEC-2020

DEFINITION Campylobacter species strain strain.

ACCESSION

VERSION

KEYWORDS .

SOURCE Campylobacter species

ORGANISM Campylobacter species

Unclassified.

COMMENT Annotated using prokka 1.13 from  
<https://github.com/tseemann/prokka>.

FEATURES Location/Qualifiers

source 1..17241

/organism="Campylobacter species"

/mol\_type="genomic DNA"

/strain="strain"

gene complement(131..637)

/locus\_tag="DMACINML\_01743"

CDS complement(131..637)

/locus\_tag="DMACINML\_01743"

/inference="ab initio prediction:Prodigal:2.6"

/inference="similar to AA sequence:RefSeq:CKG85876.1"

/codon\_start=1

/transl\_table=11

/product="hypothetical protein"

/protein\_id="Prokka:DMACINML\_01743"

/translation="MQGYAMQTKEFVLNESFKALIEGIFSNSEQSKKLIQAFEEIVND  
RATTQSLNLFENLKQQAIDEIRQELVSKDLFQSEIKRLENLSQSEIRRLENLIYSEVAR  
LEGIINTKIAEVNTKIAEVKTEFSEQISSAKQKALYWLSLGIAVATTVTMLSGAWIMM  
NFMLEALK"

gene complement(669..926)

/locus\_tag="DMACINML\_01744"

CDS complement(669..926)

/locus\_tag="DMACINML\_01744"

/inference="ab initio prediction:Prodigal:2.6"

/codon\_start=1

/transl\_table=11

/product="hypothetical protein"

/protein\_id="Prokka:DMACINML\_01744"

/translation="MKNPQKTNIKLLTAHYEILEEKYSYYQNMIEQYLDENLELATQY  
SEELAKIIKEQKTVLSGIKRLVNLGIFQKAILFLLPSKQVA"

gene complement(1042..1155)

/locus\_tag="DMACINML\_01745"

CDS complement(1042..1155)

```

/locus_tag="DMACINML_01745"
/inference="ab initio prediction:Prodigal:2.6"
/codon_start=1
/transl_table=11
/product="hypothetical protein"
/protein_id="Prokka:DMACINML_01745"
/translation="MDGYDIAILIGAITLIFGTLALVAHYFNDKHTNETKS"
gene complement(1927..2487)
/locus_tag="DMACINML_01746"
CDS complement(1927..2487)
/locus_tag="DMACINML_01746"
/inference="ab initio prediction:Prodigal:2.6"
/inference="similar to AA sequence:RefSeq:ABS43512.1"
/codon_start=1
/transl_table=11
/product="helix-turn-helix domain protein"
/protein_id="Prokka:DMACINML_01746"
/translation="MKRLSVKGNKGKKNKTYDQIMEILSIQVKENLPSKVVASRYDIT
LQTVYKWRKKYTKYLENYEKVKQEAEEKTLKEPDLENEHIHISDCAKRLRTLRIALNL
SQQRIANILGISQALYVRFKGYGQLNSFMIKKLYKTLGINPIYLICGEGDCFLIKDI
DLFERINNEQKKYNKNQLEQENILNY"
gene complement(2804..3124)
/locus_tag="DMACINML_01747"
CDS complement(2804..3124)
/locus_tag="DMACINML_01747"
/inference="ab initio prediction:Prodigal:2.6"
/codon_start=1
/transl_table=11
/product="hypothetical protein"
/protein_id="Prokka:DMACINML_01747"
/translation="MDKAEVKLKKSKMTITEKLILTLWLSCGVAIVLLLVLKIIITS
FIGILGLLSSSLVIAFVLF LAKNIKIVPYDEKKHRRKSKFAEYMSSGRCKYYHIFGA
IRDN"
gene 3517..3711
/locus_tag="DMACINML_01748"
CDS 3517..3711
/locus_tag="DMACINML_01748"
/inference="ab initio prediction:Prodigal:2.6"
/inference="similar to AA sequence:RefSeq:ARJ53354.1"
/codon_start=1
/transl_table=11
/product="conjugal transfer protein TraU"
/protein_id="Prokka:DMACINML_01748"
/translation="MIATLIDAACMNITGGVDIAYMTEVDPLWQDDELTA LINPEALL
FGNPILNLACMADSASAQGN"
gene 3732..3908
/locus_tag="DMACINML_01749"
CDS 3732..3908
/locus_tag="DMACINML_01749"
/inference="ab initio prediction:Prodigal:2.6"
/inference="similar to AA sequence:RefSeq:ARJ53354.1"
/codon_start=1
/transl_table=11
/product="conjugal transfer protein TraU"

```

```

/protein_id="Prokka:DMACINML_01749"
/translation="MPIWRKSSYRLQILAPVPHPMGMGIGQSGILWSYAKNYPVAGDN
FTFMLFKKKECCAF"
gene 3922..4581
/locus_tag="DMACINML_01750"
CDS 3922..4581
/locus_tag="DMACINML_01750"
/inference="ab initio prediction:Prodigal:2.6"
/inference="similar to AA sequence:RefSeq:ARJ53355.1"
/codon_start=1
/transl_table=11
/product="transcriptional regulator"
/protein_id="Prokka:DMACINML_01750"
/translation="MYIRDFRKRLHMTQSEFAQALGKQTNISMYEKHRVKSTCELV
KLIIRFNANPNFLFFGKEPHLNTDTFKNEISQELSQLISELFLYENEENIIVLENKA
LGKILSLVPNKEIWERLFFLFRINRKLHFVTSFICRVAKRLKQRDDEAKAYLISIINS
FNEGDFTELNEYIKLDLIALFDEKITEEEAKTIIEDCLVVFKHIENTAPIHKMVELGK
D"
gene 4602..4730
/locus_tag="DMACINML_01751"
CDS 4602..4730
/locus_tag="DMACINML_01751"
/inference="ab initio prediction:Prodigal:2.6"
/codon_start=1
/transl_table=11
/product="hypothetical protein"
/protein_id="Prokka:DMACINML_01751"
/translation="MKKQIIGSILLCSSLFAYKSTKDLKNDVLEKLIQNINDSLY"
gene 5124..5906
/locus_tag="DMACINML_01752"
CDS 5124..5906
/locus_tag="DMACINML_01752"
/inference="ab initio prediction:Prodigal:2.6"
/inference="similar to AA sequence:RefSeq:SQE23558.1"
/codon_start=1
/transl_table=11
/product="TraT complement resistance protein"
/protein_id="Prokka:DMACINML_01752"
/translation="MKINKSILKMGLSSILAASLLTGCLTTTLQTNATMSQSIFLDPV
AKEKRVVFLNIKNTSGHEVNLEPKLRSALETKGYKIIDDPDKATYILSTNVLYCDKKQ
ENNVAGGAAAAGATGVAISGYNGGGAGGMVAAGAAGALVGGLLGKLTEDTIWQMQVDI
NIKQKADGKVL TSSGNVSGQASVRDQRASGFLNSFGGSVRSKVGQLNSNQINSTQQT
YEGKYIEKNSIIFAEAVKTGLKLPEATPILENKIATQIAGLF"
sig_peptide 5124..5225
/locus_tag="DMACINML_01752"
/inference="ab initio prediction:SignalP:4.1"
/note="predicted cleavage at residue 34"
gene 5919..6350
/locus_tag="DMACINML_01753"
CDS 5919..6350
/locus_tag="DMACINML_01753"
/inference="ab initio prediction:Prodigal:2.6"
/inference="similar to AA sequence:RefSeq:ABS43376.1"
/codon_start=1

```

```

/transl_table=11
/product="putative thioredoxin"
/protein_id="Prokka:DMACINML_01753"
/translation="MILKKIKILFLAIFLAFSPMTLEAKIYDNVYAAQKQALKEAKLM
VFFVLSNTCNYCHKLMSDALNNRDLMEYLDENFIVAISDLNADGLIPRDLFNGVTPT
TYILTPGKVIPTIEGAVDSNMLFGLLKGLDYKKGQLGF"
sig_peptide 5919..5993
/locus_tag="DMACINML_01753"
/inference="ab initio prediction:SignalP:4.1"
/note="predicted cleavage at residue 25"
gene 6462..7358
/locus_tag="DMACINML_01754"
CDS 6462..7358
/locus_tag="DMACINML_01754"
/inference="ab initio prediction:Prodigal:2.6"
/inference="similar to AA sequence:RefSeq:CKG86076.1"
/note="Domain of uncharacterised function (DUF3825)"
/codon_start=1
/transl_table=11
/product="hypothetical protein"
/protein_id="Prokka:DMACINML_01754"
/translation="MKINCSKALTESGFNLEKDENEPSLVYVKKATTRNKTNLNREIQ
NKVEEKPLLQFAYFPNFLNTLQELSNIAQKEFWGSGNNILFSYLFKYFEFIHENKNY
PDIITYNKDKTKACFNTGLYSTGVFPIFAYFEKQENGGYIFRKFCNSGDRVLDLEIP
KSLNDFDSFKNELIFDSKLDLRINHLHLFERKERLPEIIKLNDRFIGHIINGELKII
KDNYNHQMIIPAAYKQKVLYIPLKLQEEVDITVVVEKEEVKNEQYYAVRTILNPH
DNIYKTARVLSIVESEWVKNTI"
gene 7935..8558
/locus_tag="DMACINML_01755"
CDS 7935..8558
/locus_tag="DMACINML_01755"
/inference="ab initio prediction:Prodigal:2.6"
/codon_start=1
/transl_table=11
/product="hypothetical protein"
/protein_id="Prokka:DMACINML_01755"
/translation="MKEITMDKAVNIKLIKIIFAVLFVLILTNIIGILFISKNEIFTKTL
VGLIAIAFILYYALAWIKTIKNIKDSSKSGVKNLFIGILKLPYELVKILFKLPKIIF
MAILTEFDYFLGYFSDKFKNKKQNNYDNFDDIDYIINNAKAIGGNAITKIGNTTFVGG
DMVTKIGNTTFIGNMVTKIGNTTFVGGDMVTKIGNTTFVGGNLVLW"
gene 8586..8744
/locus_tag="DMACINML_01756"
CDS 8586..8744
/locus_tag="DMACINML_01756"
/inference="ab initio prediction:Prodigal:2.6"
/codon_start=1
/transl_table=11
/product="hypothetical protein"
/protein_id="Prokka:DMACINML_01756"
/translation="MIKWGESVGETAKMFGWGSGIPSTPPPQNNSTTSTPPNYAPPAP
KISPEFLK"
gene 8758..9063
/locus_tag="DMACINML_01757"
CDS 8758..9063

```

```

/locus_tag="DMACINML_01757"
/inference="ab initio prediction:Prodigal:2.6"
/inference="similar to AA sequence:RefSeq:ABS43933.1"
/codon_start=1
/transl_table=11
/product="Cju26"
/protein_id="Prokka:DMACINML_01757"
/translation="MQSYSPSAASTIHKGNYGTVDSSAVGFGNNYEADKKTMGNGHL
DFAGQNTAWGQNSQGTVQQEVQGVANATNQFNKPTEQRMGGAFRCNCRRRLIIK"
gene 9529..9861
CDS  /locus_tag="DMACINML_01758"
9529..9861
/locus_tag="DMACINML_01758"
/inference="ab initio prediction:Prodigal:2.6"
/codon_start=1
/transl_table=11
/product="hypothetical protein"
/protein_id="Prokka:DMACINML_01758"
/translation="MKKDKMQIAEHILQNCYWGNTTMTPSFIVEHINDKDFARTIFSA
IFQNSLTMFEDLKIIDNEEWIKEFIISQNQRLGYHKRFYYEERLDELIAHYGIKDAGK
RREVYPYIV"
gene 9824..10495
CDS  /locus_tag="DMACINML_01759"
9824..10495
/locus_tag="DMACINML_01759"
/inference="ab initio prediction:Prodigal:2.6"
/inference="similar to AA sequence:RefSeq:ABS44734.1"
/note="conserved hypothetical protein"
/codon_start=1
/transl_table=11
/product="hypothetical protein"
/protein_id="Prokka:DMACINML_01759"
/translation="MQEKEEKYIQLYKTQDKVLDLVAKEKLDLYLTGGTALQRFHYNQ
FRFSDDLDFLINNGIKNHTPKFENDFASMLQDNNIDFEIKVSNQYFTQLYIKENNLK
IDLVNDYVFHEKNDYVKLENGLLIDSIQNIQIFVNKLETSISRDEPRDLFDIYTILTNNK
MDIEKSFILIKKTNIDPKDIINKLKNIKIEQIQYNKINTKSDFIIKDFLQNFHKSID
ENFNS"
gene 10617..10937
CDS  /locus_tag="DMACINML_01760"
10617..10937
/locus_tag="DMACINML_01760"
/inference="ab initio prediction:Prodigal:2.6"
/codon_start=1
/transl_table=11
/product="hypothetical protein"
/protein_id="Prokka:DMACINML_01760"
/translation="MDKAEVKLKKSKMTITEKLILTLWLSCGVAIVLLLVYLKIITS
FIGILGLLSVSSLVIAFVFLAKNIKIVPYDEKKHRRKSKFAEYMSSGRCKYYHIFGA
IRDN"
gene complement(10959..11156)
CDS  /locus_tag="DMACINML_01761"
complement(10959..11156)
/locus_tag="DMACINML_01761"
/inference="ab initio prediction:Prodigal:2.6"

```



```

/inference="similar to AA sequence:RefSeq:APA79438.1"
/codon_start=1
/transl_table=11
/product="TraG-like protein"
/protein_id="Prokka:DMACINML_01761"
/translation="MDNFRNQEAKTHNVVHNSAKDAIAEQNVNRKIGVNPSSLIIQDA
SKSGNELAKEAQGLFDAMSKK"
gene complement(11346..12035)
/locus_tag="DMACINML_01762"
CDS complement(11346..12035)
/locus_tag="DMACINML_01762"
/inference="ab initio prediction:Prodigal:2.6"
/codon_start=1
/transl_table=11
/product="hypothetical protein"
/protein_id="Prokka:DMACINML_01762"
/translation="MFGRNLKKIRKASGLTQLELAKILNTTQRTISLWETGSFEPPLN
TILLLCNIFKVTPNELLLEGCFDDDDNEYLAHHIVRLTKELNCKTYTKRFLFNHVLYRLE
LKKLTSHLQKFKGDSFAKKLAHSWTGKGERMLLVFYFYFIEYLEKYNINENNIDKNSFL
KLLNDFNISKDNTNTIHCFILKEKDKRNLIEWVEKEMQFEIKVLVAMLKDEIKTLVK
NEINMLNKLLV"
gene 12407..12685
/locus_tag="DMACINML_01763"
CDS 12407..12685
/locus_tag="DMACINML_01763"
/inference="ab initio prediction:Prodigal:2.6"
/codon_start=1
/transl_table=11
/product="hypothetical protein"
/protein_id="Prokka:DMACINML_01763"
/translation="MNMDNIIICKASDLEDIFKKILKENELIKNKTDENLNVQQASNY
LKISTSKLYKDCNLGKVPFCKIGKLVFKKDDLDEYLLKLNSSKNSLKF"
gene complement(12714..13844)
/locus_tag="DMACINML_01764"
CDS complement(12714..13844)
/locus_tag="DMACINML_01764"
/inference="ab initio prediction:Prodigal:2.6"
/inference="similar to AA sequence:RefSeq:ALW56279.1"
/codon_start=1
/transl_table=11
/product="integrase"
/protein_id="Prokka:DMACINML_01764"
/translation="MKNLVKIKEYKGIYFIDKDKKLEDIKEISLVELQRRLTIPYELA
IRYEGKKSSYEIFPILNNTQTLKKNCELIALQRINGKFAKKFKIKEPKLNEVFEEWI
SMRKNITISKKHVEVTFISYNAHIKDVIGNIKIKQVKLKDMQNIVNKMIDQGKSPRTTK
TIKDILSPVFEFAIKNDYIEKNIAREIEIQKFDNKRYFTIDDEDNRNALYKAIINYENL
MIRAMFIFLLHGRRKSEVLTLKWDNIDFANKIYFLPSNQKSRKNLQFPLSSLQIEAL
KNIGVKNKGYIFIKEDGNPYKDIRWHWDKINQKLTPIRLHDLRHLIGYIGINMGISL
EAIGETLGHSSIGVTKRYANIKNETINNTLNAIIFSFKTEKH"
gene complement(15024..15125)
/locus_tag="DMACINML_01765"
CDS complement(15024..15125)
/locus_tag="DMACINML_01765"
/inference="ab initio prediction:Prodigal:2.6"

```

```

/inference="similar to AA sequence:RefSeq:AAW35464.1"
/note="conserved hypothetical protein"
/codon_start=1
/transl_table=11
/product="hypothetical protein"
/protein_id="Prokka:DMACINML_01765"
/translation="MFISSKTELIQTIKNSTINNKEVKQIDFIYPNF"
gene complement(15390..15749)
/locus_tag="DMACINML_01766"
CDS complement(15390..15749)
/locus_tag="DMACINML_01766"
/inference="ab initio prediction:Prodigal:2.6"
/inference="similar to AA sequence:RefSeq:CKG86986.1"
/codon_start=1
/transl_table=11
/product="hypothetical protein"
/protein_id="Prokka:DMACINML_01766"
/translation="MVIFKNILLFLFFSTYLLAQEDFTPLEQCTYENEKFWIKILNLC
PEGNITCDKIVYVGVNKNNGKYIVLNGKSISDVNMNFKGYVFKNGIYEYNIFFNNFLYI
SKNKQIIQEYRLKLCEK"
sig_peptide complement(15690..15749)
/locus_tag="DMACINML_01766"
/inference="ab initio prediction:SignalP:4.1"
/note="predicted cleavage at residue 20"
gene complement(15743..17083)
/locus_tag="DMACINML_01767"
CDS complement(15743..17083)
/locus_tag="DMACINML_01767"
/inference="ab initio prediction:Prodigal:2.6"
/inference="similar to AA sequence:RefSeq:CKG86671.1"
/codon_start=1
/transl_table=11
/product="methyltransferase small"
/protein_id="Prokka:DMACINML_01767"
/translation="MDIKGSLSQKKVNEFVILQELISACTTDKGFALKVSFTPSKFK
FDHSFDPKEGLGEQSKNQIELKEPIIRLHYKSDRFQKDNLPYNNLLINNEKKEQDKAL
NEFNIEQKDLKDIEDINIFNQFKQDFSKDHEFKELNLSFDTNLIKLYFIIPKNIKAVY
KSAYKEFEYKDLGAGYFTQLHEYDKIINKNSLEDKKELNEYHLTFLTPAKMQNLKLQIA
QLDKILEDEDRKQELYVCKFVVVNGASENKIKAKNKDVNIDNDTKNINATKSNNISS
SENNAQEKITHLSNDGQNLKKNIEKRLKPYNDQNGKEITSYVKGATIGYGHILIGQNK
WDLYKNGITLQEADKLFKSDLLPFENAVKNSINSSLAQNEFDALVILCFNIGIDNFKN
SSVAKIINGEKTGYKTLKEAWMAWNKSQNKVMRGLINRRNAEYKLYTQGGYEKW"

```

ORIGIN

```

1  tattatgcaa  atatccacta  atactattct  tgctattcta  ttatgtttga  aagtatgaca
61  gcctatttct  ctttaaaagt  ttattgcatc  tttgcctatc  tttccttcaa  aaataatagg
121 aattagtaaa  ttatttcaag  gcttctagca  taaaattcat  cataatccaa  ggcgctgaaa
181 gcatagttac  tgtagttgct  actgcaatac  ctaatgaaag  ccaataaagt  gctttttgct
241 tagcactaga  aatttgttct  gagaattcag  ttttaacttc  agctatcttg  gtgttaactt
301 cagctatctt  ggtgttaata  attccttcta  gtcttgcaac  ttcagaataa  attaaatfff
361 caagtcttct  aatttctgat  tgggataaat  tttcaagtct  tttaatctct  gattgaaata
421 aatctttgct  tacaagctct  tgtcttattt  catcaatggc  ttgttgttta  agatfffcaa
481 aatttaagct  ttgagttggt  gctctatcat  taacaatctc  ttcaaaagct  tgaatgagtt
541 ttttagactg  ttctgaatta  gaaaaaatgc  cttctattaa  agctttgaaa  ctttcattta
601 aaacaaattc  ttttgtttgc  atagcatatc  cttgcatata  ttctcctttg  tattataaca

```

661 taaacttttt aagcaacttg cttggaaggt aataaaaata gaatagcttt ttgaaaaata  
721 ccaagattta ccaatctttt tattccactt aatacagtct tttgctcttt aattattttt  
781 gcaagttctt cactatattg agttgcta atccaaat ttttctctatc  
841 atattctgat aataactata ttttcttcc aatatttcat aatgagctgt aagtaattta  
901 atgtagttt tttgaggatt tttcattata tttccttttt gtatttttaa ataaaaaagg  
961 aatagaaatt tatattgccc aagaagggaa taaaaaaatc tattcccaac ttatagggcg  
1021 tgtaaagcta aaagctaaaa attagctttt agtttcgtta gtatgtttgt cgttaaaata  
1081 gtgagctact aaagccaatg taccaaaaat aagagtgata gcaccgatta aaatagctat  
1141 atcatagccg tccattctct ctcctttttt caaaaaaaga tcagtcctta agaaagatcg  
1201 ataatacgcc aactatcgcc aaaattagca aactttcaat gaggataata aaagctctac  
1261 tatcgcccat ttgtaaacca taaagactat tcacaaataa tcctacacaa tagattccat  
1321 gaatcttaag attgcttttg caggtat tttt tgtaaatac gatagttttt tgaaaaaatc  
1381 tttcatattt cttctcctta tcttataaca aaaaaatgct aaaagtcaag gggattaat  
1441 atcccataat gggataaaaa tatcccaact atgggttaa tgcctagagt taaaaaggaa  
1501 gatcttctcc ttgttattcc tcaaactgat gaataggtac ttgtttttgc acagactgat  
1561 tcacaggttc aggagttgat tgaacattac cataaggatt acccgattga ttattatcag  
1621 caggcttgct atctaaaaac ttcatagttt caacagcaat cttatagctt gttctatttt  
1681 ttccttctct atctgtataa ttttcttaa ccaatcttc ttgcaaaaag atttttgagc  
1741 cttttgtttt aatgaagtaa aatttcgctg tattcgtctt aaaacctcac tgcaccatt  
1801 ttttcaatta cttaggtaaa aaatggaact gttataataa cgctctttaa gaaattattt  
1861 aaaagatcgg tttattttta aaaagagaat taatttatat tattaattta atatagataa  
1921 atttatctaa tagtttaaga tgttttcttg ttcaagttga tttttgttgt atttcttttg  
1981 ttcgttattt attctttcaa ataaatcaat gtctttgatt agaaagcaat cgccttctcc  
2041 acaaattaga taaataggat tgattcctag agttttgtaa agttttttta tcataaagct  
2101 gttgagttgt ccatatcctt tctcaaatct aacataaaga gcttgggata ttccaagat  
2161 atttgctata cgctgttgac tttagattgag tgctattctt aaagttctta gtctttttgc  
2221 acaatctgat atatgaatat gttcattttc taaatcgggt tcttttaaag tttttcttc  
2281 agcttcttgt tttacttttt cgtaattttc taaatatttt gtatatttct ttctccactt  
2341 atatactgtt tgcaaggtta tatcatacct agaagctact acctttgatg gtagattttc  
2401 ttttacttgt attgataaaa tttccattat ttgatcataa gtttttttgt tttttcctt  
2461 attgcctttt acagataatc ttttcattga atattctttt ttgccttgtt ttgtgtgta  
2521 atattagccc tgattgtatc taaaaatata tttgaaaaaa tagaataatg ttttacataa  
2581 ttattaaata tatttagtaa tttttatatt taatttatat attttttaat tatatatgta  
2641 aaattatatg taaaatagaa caagatgcta ataggaaaat gggagtaa at cctagctctt  
2701 tgataatgca agatgcaagc aaatcaggca atgagcttgc aaaagaagct caaggcttgt  
2761 ttgatgctat gagtaaaaaa taagtctagc tttttggcta ggcttagtta tctcgtatag  
2821 caccgaatat atgataatat ttacaacgct cgctactcat atattctgca aatttacttt  
2881 tcttctatg ctttttctcg tcataaggaa ctatttttat attttttagca aggaataata  
2941 caaaagcaat tacaaggcta gatatagata aaagtcctaa aatacctata aagctagtga  
3001 taatttttaa atataccaaa agcaaaaaca tagctgcaac tccgcaagaa agccaaagag  
3061 taagtatgag tttttcgggt atagtcattt ttgatttttt aagttttact tctgctttat  
3121 ccattgttat tcctttcata ttaacttatt tatataacat aattatatta tatttttaata  
3181 aatttttgta agtatttttg ctattaaata cctattttat aggattaaaa gtgaattttt  
3241 acaaattgat gatagctatc tgcaattggg taaactttca attcatgcta aagaattcat  
3301 tacttaaaaa gcatttgttt ttgacttttt tcaattgaat ttttatatct aaaatatctt  
3361 caataaaaaa attattatat gtttattata tatatttata aaaaaattt ataaatatat  
3421 ataataaaca tatatttttt tctaaaaaat gatataatta tcaagaaatt tctaattaaa  
3481 gttttttata ttaaaaaat catcctagtt ctaggcata tagcaacttt aattgatgca  
3541 gcatgtatga atattacagg cgggtgtgat atagcctata tgacagaagt agatccttg  
3601 tggcaagatg atgaattaac agctttaatc aatcctgagg ctttgctatt tggtaatccc  
3661 attttaaact ttgcttgtat ggcagatagt gcatcagcac agggcaatta ggactttgtg  
3721 gagaatatcc tatgcctatt tggagaaaat catcctatag attgcaaatt ttagcacctg  
3781 ttcctcatcc tatgggaatg ggaataggac aaagtggcat attgtggagt tatgctaaga  
3841 attatcctgt agcaggagat aatttcacct ttatgctttt taagaaaaaa gaatgctgtg

3901 cattttaata agtgaggttt aatgtatata agagatttta gaaaaagatt gcacatgaca  
3961 caatcagaat ttgcacaagc attaggcact aaacagacaa atatctcaat gtatgaaaaa  
4021 cacagagtaa agtcaacctg cgagcttatt gtaaaattaa ttataagatt caatgctaata  
4081 ccaaactttc ttttctttgg caaagaacct catttgaata cagatacatt caaaaatgaa  
4141 atttcacaag aattgagtca attaatcagt gaattatttc tatatgaaaa tgaagaaaat  
4201 atcatagtgg aactagaaaa taaagcctta gggaagattc tttcgcttgt gccaaacaaa  
4261 gagatttggg aaagattggt tttcttattt agaataaaca gaaaattaca ttttgttact  
4321 tcatttattt gtagagtagc taaaagactc aaacaaagag atgatgaagc caaagcatat  
4381 ctaatttcta ttattaatag ttttaatgaa ggtgatttca ccgaacttaa tgaatatatc  
4441 aaattagatt taattgcact atttgatgaa aaaatcaccg aagaagaagc aaaaactatt  
4501 atcgaagact gcttggttgt atttaagcac attgaaaata cagctcctat ccacaaaatg  
4561 gtagaacttg gaaaagatta ataataagaa aggttaaaaa aatgaaaaaa caaattatag  
4621 gttctatttt attatgctct tcgttatttg catataaatc taccaaagat ttagataaaa  
4681 acgatgtatt ggaaaaatta attcaaaata taaatgatag tttatactaa ataaaggagg  
4741 aacaggactt aaatatagaa aattaaacac tataacatat atttttataa aggagaataa  
4801 aaacaaataa ggacaggaat gtagttgaat tttggttgat agctttgtca atgataagta  
4861 taacatagaa gcgaaagcta ctgtatactt agaagtgatt ttaaataaaa cagatttctc  
4921 tagaacttat ttagaatcta aaatttctaa ggaattttca aaacatcatg ccaaagagca  
4981 agaaaaaaat tattttaaaa aattttcaat gctatagaaa aaagcttggga tgagctaacg  
5041 ggcgaaacgg aagaaagtgc tgctaaaatt taaaaagcag gttaaagaaa tttttgaaaa  
5101 aatattcact aaaaaggaaa acgatgaaaa taaataaatc aattttaaaa atgggattaa  
5161 gcagtatttt ggacagcaagc ttgcttacgg gttgtctaac aacaacttta caaactaatg  
5221 caactatgag tcaaagcatc ttttttagatc ctgtggcaaa agaaaaaaga gttgtattct  
5281 taaatattaa aaatacaagc ggacacgaag ttaacttaga acctaaacta agaagcgcac  
5341 tagaaaccaa gggatataaa attatagatg atcctgataa agcaacttat attttaagta  
5401 ctaatgtttt atattgcgat aaaaaacaag aaaataatgt tgcaggcggg gctgcagccg  
5461 caggtgctac aggcgtagca atttagcggat ataatggagg cgggtgcaggc ggtatggttg  
5521 cagcaggtgc agcaggtgct ttagtaggag gacttttagg aaaacttacc gaagacacta  
5581 tttggcaaat gcaagttgac attaatatca agcaaaaagc cgatggtaaa gttttaactt  
5641 ctacgagaaa tgtaagtgga caagcaagcg ttagagatca aagagcatca ggatttttaa  
5701 atagctttgg cggaagtgtt cgtagcgata aagtaggaca gcttaattca aaccaaatta  
5761 atagtacgca acaaacctat gagggtaaat atatagaaaa aaattcaatt atttttgcag  
5821 aagctgtaaa aacaggacta aaacttctcg aagcaacccc tattttggaa aacaaaatcg  
5881 caactcaaat tgcaggattg ttctaaaaag gatattcttat gatactaaaa aaaataaaaa  
5941 ttttattttt agctatcttt ttagccttta gccccatgac gctagaggct aaaatctatg  
6001 ataatgtata tgctgctcaa aaacaagcat taaaagaagc aaagttaatg gttttctttg  
6061 ttctttcaaa cacttgcaat tattgccaca aactcatgag tgatgcgta aacaatagag  
6121 atttgatgga atatcttgat gaaaatttta tcgttgctat ctctgatttg aatgcagatg  
6181 gactaattcc tagagactta ttatttaatg gagtgactcc aacaacttat attttaactc  
6241 caacaggaaa agtaataggc acccctattg aaggagcggg tgactctaata atgctttttg  
6301 gattattnaaa aggttttagaa gattataaga aaggacaatt aggttttttag cgtggaaaaa  
6361 aacatagaaa aattaatttt agaagcctat gaagatagca aaactaaatt tgaacatggt  
6421 actacaggac atatcagtca atatttgaaa aaaaatatga tttgaaaatt aattgtagta  
6481 aggcgttgac agaatcagga tttaatcttg aaaaagatga gaacgaacct tctttagttt  
6541 atgtaaaaaa agctaccaca agaaacaaaa ctttaaatcg tgagcaaat caaaacaaag  
6601 ttgaagagaa gcctttatta ttccaatttg cctattttcc aaattttcta aatacacttc  
6661 aagagctttc taatatagct caaaaagaat tttgggggag cggaaataat attttattct  
6721 cctatctatt taaatatttt gaatttattc atgaaaataa aaactatcct gatattatca  
6781 cttataacaa agacaaaaca aaggcgtgtt tcaatacagg tttgtatagc acagggtgtt  
6841 ttccaatatt tgcatacttt gaaaagcagg aaaatggagg atatatTTTT agaaaatttt  
6901 gctctaattg ggatagagtt ttagatgatt tggaaatacc caaatctttg aacgattttg  
6961 attcgtttta aatgaactc atctttgata gcaagttaga ttttagaatt aaccatttac  
7021 atctcttcga gagaaaagaa cgattgcccg aaataataaa aaaactaaat gataggttca  
7081 taggacacat tatcaatggt gagttgaaaa tcatcaagga taattataat catcaaaaaga

7141 tgattattcc tgcagcttat aagcaaaagg tagttttata tattcctttg aaacttcaag  
7201 aagaatcagt tgacacaata gttgtagttg aaaaagagga agtaaaaaat gaggcagtatt  
7261 acgctgtaag aactatacta aatccgcatg ataatatcta caaaactgca agagttcttt  
7321 cgatagttga atctgaatgg gttaaaaaca ccattingaaa ataaaaatat tgataaaata  
7381 ggctttttaa ataagtctat tttatcatac aaacatttaa caagaggcta aaactcttac  
7441 gcattttgga acttttgttt ttggaatttt atcatacaaa catttaacaa gaggctaaaa  
7501 cattcattca aaaatactat aattaaagtg tattaggtat gactactctt tcgattataa  
7561 gaaggaggaa taatgagtaa gatcattgag tttttagttc ttgtcttaga atcaattaac  
7621 gagataatca agctcgttga ttatctcact taaaaaaacc gaaataatta taaataaacc  
7681 acgattggcc taagcttaag acaatttacc aaaaaaacac ttaatcgaat tatgggcatt  
7741 gttaatccct acgcttgaag gactataata gagattaaaa ttacatatta acttgcaatc  
7801 aacttgaagt taagttgtag tcagataaaa aaagaaattc gcttcaaac ccataaaata  
7861 ggtatttaat agcaaaaata cttacaaaaa tttattaaaa tatggtataa ttatgttata  
7921 taaataagtt aattatgaaa gaaataacaa tggataaagc agtaaatata aaattaaaaa  
7981 tcatttttgc cgtattatth gtattgattt taacaaatat aggcatttta tttataagca  
8041 agaatgaaat attcacaana acacttgtag gcttaatagc gattgctttc attttatatt  
8101 atgcttttagc ttggataaaa actataaaaa acattaagaa agatagctct aaaagtggag  
8161 ttaaaaatct ttttataggt attttaaaat taccttatga gttagtgaat atattattha  
8221 aattgcctaa aattatattt atggctattt taacagagtt tgattatttt ttgggctatt  
8281 tttcagataa atttaaaaac aaaaaacaaa acaactatga taattttgat gatatagatt  
8341 atattataaa caatgcaaaa gctataggcg gaaatgctat tactaaaaata ggtaatacaa  
8401 cttttgtagg cggtgatatg gttaccaaaa taggtaatac tacatttata ggcggtataa  
8461 tggttactaa aataggtaat acaacatttg taggcggtga tatggttacc aaaataggaa  
8521 acaatacatt tgtgggggga aatttagttt tatggtaatt tataagcaag cctaaattag  
8581 cttgcttatt ttaaaaattc aggagatatt ttaggcgcag gaggagcata atttggaggc  
8641 gtagaagttg tagaattatt ttgcggaggc ggagtgctag gtattccact tcccaacca  
8701 aacattttgg cagtttctcc tacactttca cccatttta tcattccact tcctgctcta  
8761 ttaataatg agccttctcc tacagttgca tctacaaaat gccccccca ttctttgttc  
8821 agtaggctta ttaattgat ttgtcgcatt agcaacctgt ccttgaactt cttgttgcac  
8881 tgttcttgt gaattgcctt gtcccaagc tgtattttgt cctgcgaaat ctaagtgtcc  
8941 atttccata gttttcttat cagcttcata attatttcca aatcctacag ccgatgaatc  
9001 tactgtgcca taattacctt tatggattgt agaagctgca gaaggactat aatagctttg  
9061 catacctacg gaacctatag tttttgctgg actattaaaa tctcctgcat taaagtattt  
9121 attgcatatt aacttgaat caatttaaag ttaagtgtag tcagataaaa aaagaaattc  
9181 atttaaagcc ccataaaata gtatttaata ctaatattac tcgtgaaatt tattaanaata  
9241 tgatataaatt atgttatatt aattgagaaa ggagctactt atgatgttaa ctgtaanaata  
9301 tatagataaa gctgtacaaa gcgtagtaag tctttctcca aaaagcaata cttgattcat  
9361 caagaaggtt ttgtttcttc agaagaaacc gtagtggctt taactaatcc thtagatcgt  
9421 agggtttttg ataactgcaa atattttaag aaagcattgc aaaaaataat tatccactta  
9481 tttttcaaaa aataatttta gtaaaattgc aaaaaagga aaattctaata gaaaaagat  
9541 aaaatgcaaa tagcagaaca ctttttaca aattgctatt ggggaaatac tactatgaca  
9601 cctagtttta tagtagaaca tattaacgat aaagactttg caagaacaat ttttagtgct  
9661 atttttcaaa attcgcttac aatgtttgaa gatttaaaga ttatcgataa tgaagaatgg  
9721 ataaaagaat tcatcatttc tcaaaaccaa agattaggct atcacaaaag attttattat  
9781 gaagaaaggc ttgacgagct tatcgcacat tatgggataa aagatgcagg aaaaagaaga  
9841 gaagtataat caattgtata aaacacaaga caaagttctt gatctagttg caaaagaaaa  
9901 attagatttt tatcttacag gtggaacagc tttgcaaga tttcactata atcaatttag  
9961 attttctgat gatttgatt ttttcttgat taacaatgga attaaaaacc atactcaaaa  
10021 agaatttaat gattttgcaa gtatgttaca agataataat atagattttg aaataaaagt  
10081 ttccaatcaa tttttactc aactttatat caaagaaaat aatctcaaaa tagatttagt  
10141 caatgattat gtatttcacg aaaaaaacga ttatgtaaaa cttgaaaatg gtttgcttat  
10201 agacagcata caaaatatct ttgttaataa gttagaaact tcaatttcta gagatgaacc  
10261 aagagatttg tttgatattt ataccatttt gacaaataat aaaatggata ttgaaaaag  
10321 ttttgatatt ttaattaaaa aaactaatat agatccaaaa gatattatta ataaatnaa

10381 aaatattaaa atagaacaaa ttcaatataa taaaattaat acaaagagtg attttattat  
10441 aaaagatttt ttacaaaatt ttcacaagtc cattgatgaa aattttaatt cttaaataaa  
10501 agaaattcgc ttcaaaccct ataaaatagg tatttaataa caaaaatact taaaaaatt  
10561 tattaaaata taatataatt atgttatata aataagttaa tatgaaagga ataacaatgg  
10621 ataaagcaga agtaaaactt aaaaaatcaa aaatgactat aaccgaaaaa ctcatactta  
10681 ctctttggct ttcttgcgga gttgcagcta ttgttttgct tttgggtatat ttaaaaatta  
10741 tcactagcct tataggtatt ttagggcttt tatctgtatc tagccttgta attgcttttg  
10801 tattattcct tgctaaaaat ataaaaatag ttccttatga cgagaaaaag catagaagaa  
10861 aaagtaaatt tgcagaatat atgagtagcg gacgttgtaa atattatcat atattcgggtg  
10921 ctatacgaga taactaagcc tagccaaaaa agctagactt attttttact catagcatca  
10981 aacaagcctt gagcttcttt tgcaagctca ttacctgatt tgcttgcatac ttgtattatc  
11041 aaagagctag gatttactcc tttttccta ttaacatttt gttctgctat ggcaccttta  
11101 gcactgttgt ggactacatt atgagtttta gcctcttgat ttctaaaatt atccatagca  
11161 tctttattat cattcttaaa ttcttttctt atattgtcac cccctgctgt tccataattg  
11221 tctaaattat ttcgattagt tctagctacc gcatcattat tatgagcatt gtgagcccct  
11281 acgcttgaag gactataata gagataaaat tacatatcaa cttgtaatca aagctataat  
11341 atatactaca ccagtaattt attcagcata tttatttcat ttttaaccag tgttttaatt  
11401 tcatctttta acatagctac caaaactttt atttcaaatt cttgcatttc tttttccacc  
11461 cattctataa gatttctctt atcttttct tttaatataa aacaatgtat agtatttgta  
11521 ttatctttag atatattaaa atcatttagg agcttcaaaa aagaattttt atcaatatta  
11581 ttttcattaa tattgtattt ttctaaatat tcaataaaat aataaaaaac taaaagcatt  
11641 ctttcacctt ttccagtcca agaatgagct aatttttttag caaaggaatc acctttaaat  
11701 ttctgcagat gcgatgtaag tttttttaac tctagtctat ataaaacatg attgaataat  
11761 ctttttgat aagttttaca attcagttct tttgttaatc ttacaatatg atgcgcaaga  
11821 tattcattat catcatcaaa acatccctct aacaatagtt catttggagt aactttaaaa  
11881 atattgcata aaagcaaaat tgtattaagc ggtggctcaa agcttctgt tcccaaaga  
11941 ctaattgttc tttgtgttgt atttagtatt tttgctagct ctaactgagt taaccactt  
12001 gcttttctta ttttttttag atttcttcca aacattttac aactccattt tttttgtaat  
12061 tataaaataa tattgcttaa tatagcataa attatctttt ttttatttaa ttgaaattta  
12121 atgatttttt atgttataat atatcataaa aaattatgaa agagcacgat gctaataaat  
12181 acaatagttt atacagaaaa gtgatttttag ctcaaatgag gatgggcggt tgttaaattc  
12241 tactatagca agaaaaaac aattatttct ttatgtttat tgcaaaatga ttttagaaaa  
12301 aacaatcagt ccaaagtatt ctatattaat aaggaaaaac gtacatgctc aaagatcggt  
12361 ttgataacaa ttcgatttat tattacttaa aaaatgagga aaaataatga atatggataa  
12421 tataataaatt tgcaaagcta gtgatcttga agatatcttt aaaaagattt taaaagaaaa  
12481 tgaattaatc aaaaaataaa ctgatgaaaa tttaaatgta caacaggctt caaattattt  
12541 aaaaataagc acttcaaac tttacaagga ttgtaattta ggaaaagttc ctttttgtaa  
12601 aattggcaaa aaacttgttt ttaaaaaaga tgatcttgat gaatatttaa aacttaatag  
12661 ctctaaaaat agtttaaaat tttaatcaca cttaactaaa aaaccattgt aaattagtgt  
12721 ttttcagttt taaaattact aaaaatagca tttagagtat tattaatagt ttcattttta  
12781 atatttgcata atctttttgt aactcctata cttgaatgtc ctaatgtttc tccaatagct  
12841 tctaaagata taccatatt aatacctata tatcctatta aatgtcttaa gtcattgtaat  
12901 ctaataggag tttttaattt ttgatttatt ttatcccaat gccatcttat atctttataa  
12961 gggtttccat cttctttgat aaaaatatat cttttatttt ttactccgat gttttttaa  
13021 gcttctattt gtaaagaact taacgggaat tgtaagtttt tccttgattt gttttggttt  
13081 gaaggtaaaa aataaatttt attagcaaag tcaatattgt cccattttta tghtaagaact  
13141 tcactttttc ttcttccatg taaaagaaat ataaacatag ctcttatcat taaattttca  
13201 taatttataa tagctttata aagagcattt ctatcctcat catcaatagt aaaatatctt  
13261 ttgttatcaa atttttgtat ctctatttct cttgctatat ttttttctat ataactattt  
13321 ttaatagcaa attcaaatc tggagaaagt atatctttta tcgtttttgt tgttcttgga  
13381 gatttacctt gatcaatcat tttattgaca atattttgca tatcttttaa tttgacttgt  
13441 tttattttga tgtttcctat aacatctttt atatgtgcat tatatgaaaa tatagttacc  
13501 tcataatggt ttttagaaat agtatttttt cgcatactaa tccattcttc aaacacttca  
13561 tttagtttag gttctttaat tttaaatttc tttgcaaatt ttccattaat tctttgtaag

13621 gcaattaact cacaattcctt ttttaagggtc tgggtggttat ttaaaatagg aaatatctca  
13681 taacttgatt tttttccttc ataatatctt atagctaatt cgtatggtat agttaatcctt  
13741 ctttgtaatt ctactaagct aatttctttt atatcctcca atttcttatc tttgtctata  
13801 aaatatatac ccttgatttc ttttattttt actagatttt tcaagatatt ctttttttgc  
13861 ttttaattta cgcagaaaat tttattattt tttacataat ataaaattaa aaatatacta  
13921 aaaatagtat ctcaaatgga ttttagtggt agcggttttg gtagcggttt ttttctcaaa  
13981 atggtataaa ataatgctat ttttaagata aacttaaaca ataaaatacc ttttttcaa  
14041 tactttgata aaaaatgata acaaaacgca ttagactcaa aatctggtaa gggcaacctt  
14101 gtgtcggttc gagtccgacc tcaggcacca tttgtttttt tactctcaag tgttattttt  
14161 tggcaattta tattaanaatc ttaaaaaaga gtttttatat tttcaaaaat agcttcttga  
14221 ttatactatg tgagttttat aatatcttct aaagctttga aaaatcacta ggaactttga  
14281 taatcaaat ttcatTTTTA agtttaattt cttaaataat aggttttggt atcataggaa  
14341 aaactttggt ttaaaaatac ttttttttaa aaaatgcata gtctttatag aaaaaacttc  
14401 ttgataaatt ttattttaat ttatatctac taaaatccag ttgcattcaa ttgcattacc  
14461 caaattcctt aaattttctc tcttgatttg cttttttcaa aaccttgcta ttttttcaa  
14521 tcaattggag atgtatattt tcattaacaa atcacacctg ctaaacttat catttactta  
14581 tttcaatctc acattcataa tcatattaga taaaagata ccatctttat caaagcctt  
14641 tgagtcatat tcattttttg attgtatagt ttgcattaaa gttgaaaggt tatacaaaact  
14701 taaactttct aatattttta tgagttctat ctgcttaaa gtattaaaac catttaataa  
14761 gttaagataa ttacttacaa tagaagaaga gtgaacta tgaataaaaa ttttattttt  
14821 tatactttt ttaataaaaa attgattatc tttaaaataa aaataatttc taagatgatt  
14881 attacttatt atttgattat aaaaatttaa aagactttct ttgctgttta agtctataaa  
14941 attaagataa aaattccttt cttctaaagc gaatttttaa gcattaagat tagtaaaaga  
15001 agtattaaga ttttcatcat tctttaaaaa ttaggataaa taaaatcaat ctgtttaact  
15061 tctttattgt tgattgttga atttttaata gtttgaatta actctgtttt agaacttata  
15121 aacataaaaag attccttata taaagcatta ttatatcatt ttttatttgc taatattttt  
15181 tgtctttatt aatctctcct atccatctta taatattacc cctatcatca atttctactt  
15241 ctaaactctt gtatttggtt taaaatttag gagctaagat ttcattaatt aggattttta  
15301 taactttaaa aacttcttgt aattccttatt gcactttttt aactttttac attctaggta  
15361 tttgttggtt ctgtttgcct ttgttggtgc tttttttcac ataattttag acgatattct  
15421 tgtataatct gcttgttttt agaaatata taaaaattat taaaatatt gtattcataa  
15481 ataccatttt taaaacata tcctttaaaa ttcatattta catcactaat agacttacca  
15541 tttaggacaa tatattttcc attattttta ttgacacca catatacaat tttatcacaa  
15601 gttatattac cctctggaca tagattttaa atttttatc aaaaactttc attttcatag  
15661 gtacattgct ctagtggagt aaaatcctct tgcgctaaca aataagtact aaaaaataa  
15721 aacaataata tttttttaaa aattaccatt tttcataacc tccttgagtg taaagcttat  
15781 attcagcatt tctcctatta attagcccc gcattacttt attttgactt ttgttccacg  
15841 ccatccaagc ttcctttaat gttttgtaac ccgttttctc tccattgatg attttagcaa  
15901 cagaagaatt tttaaaatta tcaatcccta tattaanaa taatataacc aaggcatcaa  
15961 attcgttctg tgctaaggaa gagtttattg aattttttac agcattttca aaaggtaaca  
16021 aatcgctttt aaacaattta tccgcttctt gtaaagtaat accattttta tacaatccc  
16081 atttattttg ccctataaga tgtccatata cgatagttgc acctttaaca tatgaagtaa  
16141 tttcttttcc attttgatca ttataagggt tgagtccttag ctctctata ttttttaaaa  
16201 gattttgacc atcattgctt agatgagtga ttttttcttg agcattggtt tcaactagaac  
16261 ttatattatt gctttttgta gcgtttata tctttgtgtc attatctata tttacatctt  
16321 ttttttttgc ttttattttg ttttcgctag cccattttac caccacaaat ttacaacat  
16381 aaagctcttg ttttctatct tcatcttcta agattttatc taatccttgt gcgatttgaa  
16441 gttttaaatt ttgcattttt gcaggagtta aaaaagttaa atgatattcg ttttaattctt  
16501 tcttatcttc taaagaattt ttaatgattt tatcactact atgtagctgt gtaaaaatacc  
16561 ctgctcctag atctttatat tcaaatcctt tataagcact tttataaact ttggcaatgt  
16621 ttttggggat aatgaaataa agcttgatta aattagtatc aaagctaaga ttttaattctt  
16681 taaattcatg gtctttacta aagtcttgtt taaattgatt aaagatattt atatcctcta  
16741 tatcttttaa atctttttgt tctatattga attcatttaa agccttatct tgttcttttt  
16801 tttcattatt gattaaaga ttatagatag gcaattatc tttttgaaat ctatcacttt

16861 tataatgaag tcttattata ggctctttta actctatttg atttttactt tgttctccta  
16921 agccctcttt aggatcaaag ctgtgatcaa atttaaactt acttggagta aagcttactt  
16981 ttaaagcaaa gcctttgtct gtagtgcaag ctgagatgag ttcttgtaag attacaaatt  
17041 cattatttac tttcttttga gacaaggagc ctttaatatc cactacctta gtatattgcta  
17101 tggattagg acaagctata ttttctatct cttcttttat aaatctttct tgttgttctt  
17161 tactgtgaaa tataaagagt ttgactatat aatcataagg aggtattatc tttctagctc  
17221 caggtgcatt ataagtatat a

//

LOCUS DMACINML\_16 8555 bp DNA linear 16-DEC-2020

DEFINITION Campylobacter species strain strain.

ACCESSION

VERSION

KEYWORDS .

SOURCE Campylobacter species

ORGANISM Campylobacter species

Unclassified.

COMMENT Annotated using prokka 1.13 from  
<https://github.com/tseemann/prokka>.

FEATURES

source

Location/Qualifiers

1..8555

/organism="Campylobacter species"

/mol\_type="genomic DNA"

/strain="strain"

gene

complement(698..4510)

/locus\_tag="DMACINML\_01768"

CDS

complement(698..4510)

/locus\_tag="DMACINML\_01768"

/inference="ab initio prediction:Prodigal:2.6"

/inference="similar to AA sequence:RefSeq:AON66270.1"

/codon\_start=1

/transl\_table=11

/product="type II restriction endonuclease"

/protein\_id="Prokka:DMACINML\_01768"

/translation="MKFEAIDEKEFLNPYYRKKPILEAELNEFTKALKDYKTSLENNL

KNNEDSLVANALSKFFENLHFCEIKSIHKGNSGIDLALKKDKQIQVIIEAKLPHSKE

FFSPNKPNCALHECILYLRERKALNSSLKHHIITDFYHFYIFKADLFEELFNKNKY

FKEVFENFESKNSLFGNTDEFYKECEKLLSSEKYLDSITRKDLFDEPSLKGVFIDLK

PILEQEKPSFSKLPFKIFHKDFLLSEFNPNNDANSLNNAFYKELLYILGLCESKQNS

KLIIAKSEESKEEQGTFYTAINSKLEEEENFETILKLLILWLNRIFLKLIENLVRFN

DDKMLKFLNFKKIPDFDKLSEFFELAKERSTRKKSEFAYLPYLNSSLFEKQSIENT

LEISLNNDLKLNYKNTVLKDDKCKAKKGQVGLLEYLFEFLDSFDFGSDDEQSEILS

QKELISSSVLGNVFEKLNKYKEGSFYTPSFITSYMCKESITKVVLDFNAKFDLKATD

ISELRRDLRKEDKNAQKELLNSIKICDPAVSGHFLVSALNVMLSIYDELNLFDEEFY

LEVQNDLITNRKGEFVEYKRPHSDKDKAHLIQKELFYTKKDIENNLFGVDINPNS

CEITKLRLWIELLKHSFYQSFEDAYHDLKTLPNIDINIKCGNSLISYFEIDKSLSHY

PNIKERMNKYKNIVKDYKEGFYTDKNQINQEIKNLKISFKNFCFADKFKKEMKSFNEK

CEKYSKKGFLAVNDENLRIFVSANLTLDFDEKEAKKEFANLKKKEYDNIFNLENNY

PFEWRFEPFILDDDGNFQGFDLIIGNPPYIRQEEIKELKPNLAKNYKVYKGTSDIYT

YFYELGFNILKSNGVLSFITSNKYTRAGYGEALREFLLKNVSILDYIDLNGIKVFDSA

TVDTSILSFELKSKDSSFRYLALDNENLKACGYSIDLCKDFKELSQKSLSKENFTFS

DESTNSLKAKIERIGTPLKEWQGLNIYRGILTGYNEAFIISTEKREILENCKDEAEK

ERTAKLIRKMLRGRDIKRYSEWAGLWIIIFIPWHFPNVEKPKTMLENEQDLKEQYPSL

YKHLLSHKERLSKRNKEETGIRYEWYCLQRWGANYYYQFEKEKIVYPNMNKEFIAFFD

NEFFLLNQKCFILSHQSNKKELLYLTALLNSNVNFYFYFKQIGAKLGASGYEMSKIFV



EKLPIPKINSKNQKIADELVNSVDEILKAKEQDKNANTQELNKINSLVYKLYNLTED  
 EIKIIEGK"  
 gene 4739..5128  
 /locus\_tag="DMACINML\_01769"  
 CDS 4739..5128  
 /locus\_tag="DMACINML\_01769"  
 /inference="ab initio prediction:Prodigal:2.6"  
 /inference="similar to AA sequence:RefSeq:CJM129\_8915"  
 /codon\_start=1  
 /transl\_table=11  
 /product="hypothetical protein"  
 /protein\_id="Prokka:DMACINML\_01769"  
 /translation="MTYRPLFFDLYLPFRYNKILQTGDYNGFIFIIYRFFGLGLIVWL  
 LLKDKTTPVLAFILVSAFVGALLMIMDASSLGVGKALGVQGDVLFNKVMKGFIVDEVK  
 SVSNTAALFVFSILFFSTLSASGFSTR"  
 gene 5191..6126  
 /locus\_tag="DMACINML\_01770"  
 CDS 5191..6126  
 /locus\_tag="DMACINML\_01770"  
 /inference="ab initio prediction:Prodigal:2.6"  
 /inference="similar to AA sequence:RefSeq:CAL34372.1"  
 /codon\_start=1  
 /transl\_table=11  
 /product="putative citrate transporter"  
 /protein\_id="Prokka:DMACINML\_01770"  
 /translation="MAIFVHLDGSGAATFLIVVPALLPMYERLNMRKSSLLLICASAM  
 WMMNVLPWGGPTLGAATVIKADANALWHQPIISMQILGIVLALTLVILIGYQEKRRGAG  
 GNLEGIKLEIEKSEYQNDKFFWVNVFLIAVIAALVVNIPSYVCFMIGFAIALPLNY  
 PDLKLAKKVMGKASGSAIMMCITLIGAGILIGIFDKSGIMNKMGSILTLIPNEYSNF  
 IPLIIGLLAVPMALIFCTDSYFYGVMPVLSVTNAFGIDPVDIAIIMVLARNCATFIS  
 LVVPATLFGCLANVAIKEHIKRSFFIYGTLVSSA"  
 gene 6576..8246  
 /gene="ggt"  
 /locus\_tag="DMACINML\_01771"  
 CDS 6576..8246  
 /gene="ggt"  
 /locus\_tag="DMACINML\_01771"  
 /EC\_number="2.3.2.2"  
 /inference="ab initio prediction:Prodigal:2.6"  
 /inference="similar to AA sequence:RefSeq:EAQ71956.1"  
 /codon\_start=1  
 /transl\_table=11  
 /product="gamma-glutamyltransferase"  
 /protein\_id="Prokka:DMACINML\_01771"  
 /translation="MRYLVIFVISITLGFGAANPPIQDETGTGLALSSLELANKIGKE  
 ILEKGGNAIDAAVAVGYALAVVHPAAGNIGGGGFAVIHLANGENVTLDFREMAPLKAS  
 KDMYLDKGEVVQDASTIGYLAAGVPGTVKGM SAMLD RYGTMKLKDLMAPAI ELAEKG  
 YLINNRQEQTLLLEAKDMFKKFPSSSKYFLKKDYGSTYKSGELFIQKDLAKTLKLIKEG  
 PDAFYKGIADLIANDMAKNKGIITKEDLAQYQVIWRKPKVGTYRGYDIISMSPSSG  
 GTHIIQILNIMENANIENLGFASSKTLHIMAEAMRQAYADRSEYMGDPDFVKIPLDKL  
 TSKEYAKEIYAKIPKDKALPSSKVKPGLGQIHEGHNTTHYSVLDGKGNV SITYTINA  
 SYGSGAAIDGAGFLNEMDDFSIKPGVPNLYGLVGGEANAIEPKKRPLSSMSPTIIL  
 KDGKVMVVGSPGGSRIITTVLQVISNVIDHKMDISTAVESPRFHMQLPDEIRTEPF  
 GIIKDVQNNLEKMGYKITEKPYMGDVNAIMIDPKTKKIVGSM DTRKEF"

ORIGIN

1 aactgtgaaa gtccaaaact aacccttgct ttaaataatag catgattaaa gattgtcttt  
 61 cctataaaaa caactcctaa aaattgattt tcgattatat cactgtcgtt ttgatttgct  
 121 tgaaatttgg tgtttgtaaa aattgtttca tttttaaact gtgaaagtgc aaaactaact  
 181 cttgctttaa atgtagcgtt agaaaaagat gctcttcctt caaaaataac ttcttcaaaa  
 241 atattttcta ttattttgct attattttgc tctgcttgga actgagtttc tataaatcct  
 301 acctcttctt taaacacaga tgccaaaaaa tctaccctag aattaaattc tgctttagaa  
 361 aaatccacta cagcatcaaa tatacactgc tgaatatata cttcattttt aaaatgtaac  
 421 tctctagcga taatgtgggt tttaaaattg caaactttaa aatctatttt tatagtattc  
 481 tttactaaga aataaagata ttttatttca cttctaataa tacaatttc ttttatgcct  
 541 gcttcttgca atgtttgaaa atttatctct tcaatttcaa ccctatctat aattatttta  
 601 tgctcttttt ttagaatttt tttattgtct tttgtaacta gcttgccatt ttttgccaaa  
 661 attccatatt gtgctaattc tttatcgaat tcttccatta tttgccttca atgattttta  
 721 tctcatcttc ggtgagattg tagagtttat aaaccaaga attgattttg ttttctagtt  
 781 cttgggtggt tgcgtttttg tcttgttctt tagcttttaa aatttcatcg actgaattta  
 841 caagctcatc ggctattttt tgatttttag aatttatttt tggatatagga agtttttcta  
 901 caaatatttt actcatttca taaccactag cacctaattt tgctccaatt tgcttaaaat  
 961 aataaaaatt aacattagaa ttttaacaat ctgttaaata taacaattct tttttgttat  
 1021 ttgattgatg agataagata aacatttttt gatttaacaa aaagaattca ttgtcaaaaa  
 1081 atgctataaa ttccttattc atatttggat acactatctt ttctttttca aattcttgat  
 1141 aatagtttgc tccccatctt tgcaacaat accattcata acgaattcct gtttcttctt  
 1201 tatttctttt agataatcct tctttatgag atagcaagtg cttatataag ctcgatatt  
 1261 gttcttttaa atcttgttca ttttctagca ttgtctttgg tttttcaaca tttggaaaat  
 1321 gccaaaggtat aaatattatc caaagtcctg cccattcata gctgtatctt tttatatcgc  
 1381 gtccgcgtag cattttgcgt atgagtttgg cgggtgcgtt tttttcggct tcatctttac  
 1441 aattttccaa aatttcattt cttttttcag tgctgatgat aaaggcttca ttatagcctg  
 1501 ttaaaattcc acgatataa ttaagtcctt gccattcttt aagcggagt cctatgcgtt  
 1561 ctatcttggc ttttagggaa tttgtgcttt catcactgaa agtaaaattt tctttactta  
 1621 aggacttttg cgacaattct ttaaagtcct tacacaaatc gatactatat ccacaagctt  
 1681 ttaaattttc attatccaaa gcaagatata taaagctact atccttgctt tttactttt  
 1741 caaagctcaa tatactcgta tccactgtcg cactatcgaa aacttttata ccatttaagt  
 1801 cgatataatc caaaatcgaa acatttttaa gcaaaaattc acgcaaagcc tcgccatata  
 1861 ctgctgctgt gtatttgtaa gaagtataaa aagataaaac accatttgat ttaaggatat  
 1921 taaaaccaag ctcataaaaa taagtataaa tatcgctcgt gcctttataa acctataat  
 1981 tcttagccaa attcggctta agctctttta tctcttcttg tcttatataa ggcggattgc  
 2041 cgatgatgag atcaaagcct tgaaaatttc catcatcgtc caaaatttca ggaaattcaa  
 2101 aacgccattc gaaaggataa ttgttttcta ggttgaagat attgtcgtat tcttttttaa  
 2161 gatttgcaaa ttcttttttc gcttcttttt catcaaaatc aaaaagagtc aaattcgcac  
 2221 tgacaaaaat tctcaaattc tcatcattta cagctaagaa attgccgtat tttttggagt  
 2281 atttttcgca tttttcatta aaacttttca tctctttttt aaatttatcc gcaaagcaga  
 2341 aattttttaa agaaattttg agatttttta tctcttggtt gatttgattt ttatcgggtg  
 2401 aaaagccctc tttgtagtct ttgactatgt ttttgtattt gttcatgcgt tctttgatgt  
 2461 ttgggtaatg gcttaggctt ttgtcgattt caaagtaaga tatcaaggaa tttccgcatt  
 2521 ttatgtttat atcgatgttt ggcagggttt taagatcgtg atacgcctca tcttcaaagc  
 2581 tttggtaaaa gctgtgtttt aaaagctcta tccaaagtct tagtttggtg atctcgcag  
 2641 agtttgggtt gatatcgacg ccaaaaaggt tgttttctat gatattttt ttcgtgtaaa  
 2701 aaagctcttt ttggatcaag tgggctttgt ctttgtccga atgcgggctt ttgtattcta  
 2761 caaattcgcc tttgcggttg gtgatgagaa tttcatcgtt ttgtacttct aggtaaaact  
 2821 cctcatcaaa aagatttagc tcatcgtaga tacttagcat gacattttaa gccgatacta  
 2881 gaaaatgcc acttcttacc gcaggatcgc aaatttttat ggagttttaa agctcttttt  
 2941 gtgcgttttt atcctctttt cgcaaatccc ttcttagctc gctgatattc gtagccttaa  
 3001 gatcaaattt ggcattgaat ttatcaagca ctacttttgt gatgctttct ttacacatat  
 3061 aagaagtgat aaagcttggg gtgtaaaagc ttcttctttt gtagccattg agcttttcaa  
 3121 acacatttcc caaaacgctt gagcttataa gctctttttg gcttaaaatt tcgctttgct

3181 catcatcact accaaaatca aaactatcca aaaattcaaa caaatactcc aaaagcccca  
3241 cttgtccttt tttagccttg cttttgtcat ctttttagcac cgtgtttttg tagtagttaa  
3301 gcttttaaatc attgttttaa ttcgaaatth caagcgtggt ttctatgctt tgtttttcaa  
3361 acaaagaaga attcaagtaa ggcaggtaag caaattcgct tttctttcgt gtgcttcttt  
3421 ctttggctaa aatttcaaag aaaagctcgc taagcttgtc aaaatcaggg atttttttaa  
3481 aatttagaaa tttcaaattt ttatcatcat taaaacgcac caaatttgac tctataagct  
3541 ttaaaaacaa gatgcgatta agccataaaa tcaaaagtth taaaatgggt tcaaaatttt  
3601 cttcttcaag cttggaattt atagctgtgt aaaaggtgcc ttgctcttct ttgctctctt  
3661 cgctttttgc gatgatgagc tttgagtttt gtttgctttc gcaaagccct aggatatata  
3721 aaagctcttt gtaaaaggcg ttgttgagtg aatttgcac gttgggggta aactcgctta  
3781 gcaaaaagtc tttgtgaaaa attttaaca aaggcttgag cttgctaaag cttgggtttt  
3841 cttgctccaa aataggcttt agatcgataa aaacaccctt taagctaggc tcatcaaaaca  
3901 aatcctttct tgtgatagaa tcaagatatt tttcactgct taaaagcttt tcgcaactctt  
3961 tgtaaaattc atcggatttg cccttaaaaa gagaattttt gctttcaaaa ttttcaaaaa  
4021 cttcttttaa atacttgttt ttgttaaaaa gctcttcaaa caaatctgcc ttaaagatat  
4081 aaaaatgata aaaatccgtg atgatgatgt gcttgagtga tgaattttaa gcctttcttt  
4141 cacgaagata atacaaaatg cactcgtgca aggccttgca gttgggcttg tttgggctaa  
4201 agaattcttt agaatggggc aattttgctt cgatgatgac ttgaatttgt ttatcttttt  
4261 ttaaagcaag atctataccg ctgttgcttt tgtgtatgct ttttatctca cactcaaaat  
4321 gcaaattttc aaaaaatttg cttaaagcgt ttgccactag ggagtcttcg ttgtttttga  
4381 gattgttttc taagcttgtc ttataatctt ttaaagcttt tgtaaatcca tttagctctg  
4441 cttctaaaaat aggctttttg cggtagtaag gatttaaaaa ttctttttca tctatagctt  
4501 caaatctcat cttatacttt caataaattt taaataattt taacaaaata tcacctaaagt  
4561 taatataaaa aatttattga gttacatttt gtaatcaaat ataaaatcat ttttcaaaaa  
4621 cattagacaa aaaatatcaa atttcgcaaa aatagcttca tatcggcggt taaagcttta  
4681 gagaataccg catataaaat caacactttt taaagatggt aaaaaaagta atatttttat  
4741 gacttatcgt ccattattct ttgatttata cctaccattt agatacaata aaatattaca  
4801 aacaggggat tataatggat ttattttttat catttatcgg ttttttggac ttgggctaata  
4861 tgtttggctt cttttaaaag ataaaaccac acccgttctt gctttttatat tagtcagtg  
4921 tttttagtagt gcattgctta tgataatgga tgctagtagc cttgggtgctg gaaaggctct  
4981 aggggttcaa ggagatgttt taaattttta ggttatgaaa ggtttcatag tcatgaagt  
5041 aaaaagcgtg agcaatacgg ctgcgttgtt tgtcttttcg atacttttct ttagcacact  
5101 gagtgcgagt gggttttcaa caagataatt aattttttat tgagtaaagt tagtcccaat  
5161 atttatgtga tcaccatcct aacatctatc atggcaatat ttgttcatct tgatggtagc  
5221 ggagcagcaa cttttcttat agtagtcctt gcattgttgc ctatgtatga gcgtttaaat  
5281 atgagaaaat catcgttatt actcatttgt gcaagtgcaa tgtgggtcat gaatgttctt  
5341 ctttgggggtg gcccaacact tggagctgca actgttataa aagccgacgc caatgcttta  
5401 tggcatcagc caatctctat gcaaatctta gggatcgtct tagctcttac tttagtaatc  
5461 ctcataggct atcaagaaaa aaggcgtggg gcaggtggaa atcttgaagg aataaaactt  
5521 gaaattgaaa aaagcgaata tcaaaacgat aagtctttt ggggtgaatgt atttttacta  
5581 atcgctgtta tagctgcttt agtcgtaaat attttgcctt cttatgtttg ctttatgata  
5641 ggctttgcta tagccttgcc gctaaactat cctgatctaa aactcgcaaa aaaagttatg  
5701 ggtaaagcaa gcggtagcgc tatcatgatg tgtattacat taatcgggtc agggattttg  
5761 ataggtatat ttgacaagag tggaatcatg aataaaatgg gctcatctat actcactctt  
5821 atacctaatg aatatagcaa tttcatacct ttaatcatag gcttattggc tgtgcctatg  
5881 gctttgatat tttgcacaga ttcttatttt tatggagtta tgcctgtcgt tctaagcgtt  
5941 accaatgctt ttggaataga tcctgtcgat attgctatta tcatggtttt agctagaat  
6001 tgtgctactt ttatcagtct tgttgcctt gctacactgt ttggttgcgg tcttgctaata  
6061 gtagccataa aagaacacat aaaacgctca ttttttatat atgggacatt agtatcatct  
6121 gcctaatctt tggatatatc acaggtgtaa tcccgcaatt gttttaaatc aaaaacctat  
6181 ttcaatcaat ttgaaatagg tttttgcttc ttcttttgct tcttaaatct catcttttat  
6241 tcttgataag tttttatctt aaaatactcg aaaaacaata ctaagaataa atttttaata  
6301 taactctatt tataagattt cccttaggct aaaatgggat ttaaattcaa aactttcttt  
6361 aaagtattta ttgttaaaaa aatcttcaaa taaatcctcc ttaaagatat aaaaattatt

```

6421 tagttacatt ttgtaataaa atataaaaaat tatttttttaa aaatgtaaag tttctataca
6481 aaaaataaaa atttatatct tttatcaaaa taactatttg tgattagttt aatttttggt
6541 acaataattc tatatactaa aaaaggagga gtaatatgcg ttatttagtt atattttgtga
6601 tttcaatcac gctaggtttt ggtgcagcca atccacccat acaagacgaa acaggcacag
6661 gacttgccct atcaagcctt gagcttgcca acaaaatagg taaagaaatt ctcgaaaaag
6721 gtggtaatgc tatagatgcg gctgtagctg taggctacgc tttagctgtg gtacatcctg
6781 cagcaggaaa cataggcggg gggggccttg cggttattca tctagcaa at ggagaaaatg
6841 ttacattaga ctttagagaa atggcacctt taaaagcaag caaagatatg tatcttgatg
6901 acaaagggga agttgtcaa gatgcttcaa ctataggcta tttagccgcc ggagtaccag
6961 gaacagtcaa aggtatgagt gctatgcttg atcgctatgg cactatgaaa ttaaaagact
7021 tgatggctcc tgctatagaa ctagctgaaa aaggctatct tatcaacaat aggcaagaac
7081 aaaccttgct agaagccaaa gatatgttta aaaaatttc tagctcaagt aaatatttc
7141 ttaaaaaaga tggtagtact tataaaagtg gggagtgtt tatccaaaa gatctagcaa
7201 agactttaa actcatcgcc aaagaaggc ctgatgctt ttataaaggg aaaattgcag
7261 atctaatagc aaatgatatg gctaaaaata aaggatcat caccaaagaa gatctagcac
7321 aataccaagt catttgaga aaaccgtaa aaggactta tagaggctat gatattat
7381 ctatgctgcc acctagtagc gggggctact atatcattca aattttaaac atcatggaaa
7441 atgctaatat agaaaattta ggttttgcaa gctctaaaac tttacacata atggctgaag
7501 ctatgctgca agcttatgca gatagatcag aatacatggg tgatcctgat tttgtaaaaa
7561 ttccacttga taaactcaca agtaaagaat acgccaaga aatctatgca aaaattccaa
7621 aagataaagc cttgccaagc tcaaaagtta aaccgggtt aggacaaatt catgaaggac
7681 ataataccac tcattattct gtgctagatg gcaagggtaa tgcagtaagc attacttata
7741 caattaatgc aagctatggt tcaggtgctg ctatcgatgg agcaggattt ttgctcaaca
7801 atgaaatgga tgatttttca atcaaaccag gaggttccaa cctatatgga cttgtaggcg
7861 gggaggctaa cgctatagaa ctaaaaaaa gacctttaag ctctatgagc ccgactatca
7921 tacttaaaga tggaaaagta tttatggtgg tgggtagccc aggcggtctt agaatcatca
7981 caacagtttt gcaagtgatt tcaaatgtaa tcgatcataa aatggatata tcaacagcgg
8041 tagaatctcc aagatttcat atgcaatggc tacctgatga aatcagaaca gaaccttttg
8101 ggatcatcaa agatgtacaa aataatcttg aaaaaatggg ttacaaaatc accgaaaaac
8161 cttatatggg cgatgtaaat gctatcatga tcgatccaaa aaccaaaaaa atagtaggct
8221 ctatggatac aagaaaagaa ttttaacttt gcttttaacc ttaaaggctc ttttataaat
8281 acaactgtag atcttttagg gctaactaaa agatctcatt ttaaaaatct atattttaca
8341 actttttaa aatattaac caccaattta acaatcaaca tataaaaaa aattcaatat
8401 attaaaaca gtttcaataa acacaataaa aaaaggataa ttaatacaaa aacatattta
8461 attagcatac aaaaaataaa tttaatagat aaaaatatac aagcaaacac caaatttaac
8521 aattaaacta aaaacagatt aaaaatgatt aaacc

```

//

```

LOCUS      DMACINML_17          8303 bp    DNA       linear     16-DEC-2020
DEFINITION Campylobacter species strain strain.
ACCESSION
VERSION
KEYWORDS   .
SOURCE     Campylobacter species
  ORGANISM Campylobacter species
            Unclassified.
COMMENT    Annotated using prokka 1.13 from
            https://github.com/tseemann/prokka.
FEATURES   Location/Qualifiers
  source    1..8303
            /organism="Campylobacter species"
            /mol_type="genomic DNA"
            /strain="strain"
  gene      435..1001
            /locus_tag="DMACINML_01772"

```

CDS 435..1001  
/locus\_tag="DMACINML\_01772"  
/inference="ab initio prediction:Prodigal:2.6"  
/codon\_start=1  
/transl\_table=11  
/product="hypothetical protein"  
/protein\_id="Prokka:DMACINML\_01772"  
/translation="MKYIILTFILGLIVFVSVKGC FYPTSYRAFIPKSLDSEYKEFER  
LCKEEVGKVYARPIKHGIKLEDLFNLPSTSVRRVALSRHMYMLIENVTTREDEIFYL  
HIAGFEYYTGWTRKSF SMHDDSKKYIRCEPLLYGKTWKENAKIMEQKAFDNKEYIGTE  
EYLQYSPYHYEYNTLYRQIVNFKQKKN"

gene 1001..1153  
/locus\_tag="DMACINML\_01773"

CDS 1001..1153  
/locus\_tag="DMACINML\_01773"  
/inference="ab initio prediction:Prodigal:2.6"  
/codon\_start=1  
/transl\_table=11  
/product="hypothetical protein"  
/protein\_id="Prokka:DMACINML\_01773"  
/translation="MIYNYKYSLGIYVNDWGFMMGSEGNPHVFLGLKREQVHCGDMQI  
KNTIYK"

gene 1206..1712  
/locus\_tag="DMACINML\_01774"

CDS 1206..1712  
/locus\_tag="DMACINML\_01774"  
/inference="ab initio prediction:Prodigal:2.6"  
/inference="similar to AA sequence:RefSeq:CKG86719.1"  
/codon\_start=1  
/transl\_table=11  
/product="hypothetical protein"  
/protein\_id="Prokka:DMACINML\_01774"  
/translation="MGDSITLSIIMGMLFSILYFVIFIKNYIIIALIVLVVFSIINYW  
IKINIKEFVKSYFLISFIIFFTAIVIVFYLYDLETSRGLVLLGPPEIEELSPQEYKV  
HGYFGFLFFTSIGFCTITFFILPCLLQAYLFKCYSTGEKRKLSWFIGFVCNPILITS  
MYVIYENL"

gene 1831..2331  
/locus\_tag="DMACINML\_01775"

CDS 1831..2331  
/locus\_tag="DMACINML\_01775"  
/inference="ab initio prediction:Prodigal:2.6"  
/inference="similar to AA sequence:RefSeq:CKG86719.1"  
/codon\_start=1  
/transl\_table=11  
/product="hypothetical protein"  
/protein\_id="Prokka:DMACINML\_01775"  
/translation="MGDSITLYIFLGLLGFISVFTFARTYFITLAVFIIFSIINYWMMR  
INIKEFVKSYFLIFFVILFADIIGVYFYGYNIENPAKFTSLFLEVQQLPSEEYLVFSC  
LAFLFIITMEFFIITFFILPCLLQAYFFKCYSTGEKRKLSWFIGFVCNIFLLIVSFY  
KLYENL"

gene 2318..2449  
/locus\_tag="DMACINML\_01776"

CDS 2318..2449  
/locus\_tag="DMACINML\_01776"

```

/inference="ab initio prediction:Prodigal:2.6"
/inference="similar to AA sequence:RefSeq:CKG86746.1"
/codon_start=1
/transl_table=11
/product="hypothetical protein"
/protein_id="Prokka:DMACINML_01776"
/translation="MKIFKDYQKFTPYGLDFKLYSKDFITKLDFKDKAYNVLYNTGV"
gene 2450..2953
/locus_tag="DMACINML_01777"
CDS 2450..2953
/locus_tag="DMACINML_01777"
/inference="ab initio prediction:Prodigal:2.6"
/inference="similar to AA sequence:RefSeq:CKG86719.1"
/codon_start=1
/transl_table=11
/product="hypothetical protein"
/protein_id="Prokka:DMACINML_01777"
/translation="MGDSITLSIFWGLILFIASFTVARIYLIALLSVLIVFSILNYWIK
INIKEFVKSYFLISFIIFFMAIVIVFYLTLDLETSRGLVLLGPPEVEKLSPQEYKAHN
YFKFLTFTTMFFLAITFFILPCLLQAYFFKCYSTEERKKLSWFIGFVCNIFLLIVSF
YKLYENL"
gene 2940..3071
/locus_tag="DMACINML_01778"
CDS 2940..3071
/locus_tag="DMACINML_01778"
/inference="ab initio prediction:Prodigal:2.6"
/inference="similar to AA sequence:RefSeq:CKG86746.1"
/codon_start=1
/transl_table=11
/product="hypothetical protein"
/protein_id="Prokka:DMACINML_01778"
/translation="MKIFKDYQKFTPYGLDFRLYSKDFITKLDFKDKAYNVLYDTGV"
gene 3072..3566
/locus_tag="DMACINML_01779"
CDS 3072..3566
/locus_tag="DMACINML_01779"
/inference="ab initio prediction:Prodigal:2.6"
/inference="similar to AA sequence:RefSeq:CKG86719.1"
/codon_start=1
/transl_table=11
/product="hypothetical protein"
/protein_id="Prokka:DMACINML_01779"
/translation="MGDSITLSIFWGLILFIASFTVARIYLIALLSVLIVFSILNYWIK
INIKEFVKSYFLISFIIFFTAIVIVFYLTLDLETSRGLVLLGPPEIEKLSPQEYKARN
YFGFLSGITIIFLAITFFILPCLLQAYLFKCYSTGEKRKKLSWFIGFVCNIFLLTASV
YAMY"
gene 3553..3693
/locus_tag="DMACINML_01780"
CDS 3553..3693
/locus_tag="DMACINML_01780"
/inference="ab initio prediction:Prodigal:2.6"
/inference="similar to AA sequence:RefSeq:CKG86746.1"
/codon_start=1
/transl_table=11

```

```

/product="hypothetical protein"
/protein_id="Prokka:DMACINML_01780"
/translation="MRCIKIFKDYQKFTPYGLDFKLYSKDFIAKLDFKDRAYNVLYNT
GV"
gene 3694..4203
/locus_tag="DMACINML_01781"
CDS 3694..4203
/locus_tag="DMACINML_01781"
/inference="ab initio prediction:Prodigal:2.6"
/inference="similar to AA sequence:RefSeq:CKG86768.1"
/codon_start=1
/transl_table=11
/product="hypothetical protein"
/protein_id="Prokka:DMACINML_01781"
/translation="MGEDITLSIFWGLVGFIFRLVTIDAILYITALSVLIVFSIINYW
IKINIKFVKSYFLVYFTIFFTAIVIIIFYLSYDLETSRGYVMLGLPEVEELSPQEYIV
YKCSKFLIFINFIFFTITFIILPCLLQAYLFKRYSTEKRKKSWSWFIGFLCNIIILIA
SVYLMYIFI"
gene 4322..4825
/locus_tag="DMACINML_01782"
CDS 4322..4825
/locus_tag="DMACINML_01782"
/inference="ab initio prediction:Prodigal:2.6"
/inference="similar to AA sequence:RefSeq:CKG86821.1"
/codon_start=1
/transl_table=11
/product="hypothetical protein"
/protein_id="Prokka:DMACINML_01782"
/translation="MGDSIMLSTSLGLVGFIFAFTNIKFYLTTLVSVLIVFSILNYWIK
INIKEFVKSYFSIYFIIFFTAIVIIIFYLTYGIETSKDLALLSSLEAKELSPQEYKARN
YFGFLTCMTMFFLVITFIILPCLLQAYLFKCYSTGEKRKKSWSWFIGFVCNIIILIASV
YLMYIFI"
gene 4944..5447
/locus_tag="DMACINML_01783"
CDS 4944..5447
/locus_tag="DMACINML_01783"
/inference="ab initio prediction:Prodigal:2.6"
/inference="similar to AA sequence:RefSeq:CKG86821.1"
/codon_start=1
/transl_table=11
/product="hypothetical protein"
/protein_id="Prokka:DMACINML_01783"
/translation="MGEDITFSIFWGLFGFILAFTNIKFYLTTLVSVLIVFSILNYWIK
INIKEFVKSYFLISFIIFFTAIIIIIFYLSYDLEFYKSLVLLDPLEIEKLSPQEYRVRN
YFKFLTFATMFFLVITFIILPCLLQAYLFKCYSIGEKRRKKSWSWFIGFVCNAPILIASV
YVVYENL"
gene 5425..5565
/locus_tag="DMACINML_01784"
CDS 5425..5565
/locus_tag="DMACINML_01784"
/inference="ab initio prediction:Prodigal:2.6"
/inference="similar to AA sequence:RefSeq:CKG86746.1"
/codon_start=1
/transl_table=11

```

```

/product="hypothetical protein"
/protein_id="Prokka:DMACINML_01784"
/translation="MWYMKIFKDYQKFTPYGLDFRLYSKDFITKLDKFKAYNVLYNT
GV"
gene 5566..6057
/locus_tag="DMACINML_01785"
CDS 5566..6057
/locus_tag="DMACINML_01785"
/inference="ab initio prediction:Prodigal:2.6"
/inference="similar to AA sequence:RefSeq:CKG86719.1"
/codon_start=1
/transl_table=11
/product="hypothetical protein"
/protein_id="Prokka:DMACINML_01785"
/translation="MGDSIALSIFWGLIGFILTCSVIEFYLIALSVLIVFSILNYWIK
INIKEFVKSIFLISFIIFFMAIVIVFYLYTYDLETSRGLVLLGPPEIEKLSPOEYKARN
YFDLGGITFIFLVITFFILPCLLQAYLFCYSTGEKRKLSWFIGFVCPILMASVY
VMY"
gene 6131..6313
/locus_tag="DMACINML_01786"
CDS 6131..6313
/locus_tag="DMACINML_01786"
/inference="ab initio prediction:Prodigal:2.6"
/inference="similar to AA sequence:RefSeq:CKG86695.1"
/codon_start=1
/transl_table=11
/product="hypothetical protein"
/protein_id="Prokka:DMACINML_01786"
/translation="MNRELFITRLAFINNDEINKINKNSSIAYLKVLYQCENSIIVNY
DKKRAFHLKHYYHSQL"
gene 6378..7577
/locus_tag="DMACINML_01787"
CDS 6378..7577
/locus_tag="DMACINML_01787"
/inference="ab initio prediction:Prodigal:2.6"
/inference="similar to AA sequence:RefSeq:CKG86671.1"
/codon_start=1
/transl_table=11
/product="methyltransferase small"
/protein_id="Prokka:DMACINML_01787"
/translation="MYYKEHKYQKDNLLITNLYLNDTLYQNEQGLDKLELSKNDLFNL
NDINILNLTQDFSKDYEFKECEIRLGMHLKLIIFIPKNIKVYKSAYKEFENKDLG
AGYFTQLHEYDKIIKNSLEDKKELENEYHLTFLTPSKMQKIDFEIAKGLDEWLDNENVC
CFNVYTKDYFNANNKDMMLISDNIKDDTNTTQAHINENYNTQEIIPDNVIRIQTQDGS
GEFIEIVFDEFKEWEKSSSGAIKPLFSPLGGIVDEALESLENSIIGDALTMLGAVKN
PKNAKNIKKKSKYATKQEVIEVLKNKYNLKTSKELGLRRSKNVFVAKDNKQIKEIWD
EITDGADILKDINQDKLGGTIKMRKLDDETIIKLRKSKSGGSAVEIDKKPEAQVKIH
NTRNLKK"
gene 7574..8281
/locus_tag="DMACINML_01788"
CDS 7574..8281
/locus_tag="DMACINML_01788"
/inference="ab initio prediction:Prodigal:2.6"
/inference="similar to AA sequence:RefSeq:CKG86653.1"

```



```

/codon_start=1
/transl_table=11
/product="hypothetical protein"
/protein_id="Prokka:DMACINML_01788"
/translation="MIYKVLTDLQGYMFLELSEEICNTIKANQKTVYDVEFELFLQIP
NITKTDILEHFEETILKSSIGCFRNDNTMELDSLFFAYLLDSKNVIGDNSTNPTYISE
YINIIGQLFLAGYIEFGMCLQDKEENLLSNQGDYQAWVYFRDNFFYTDHYRVID
LREKYPNMSDDDYAYSKWMPQYWDRYTFWVAITEKGTKYLNEILAPKFYNKYKDLEV
EIDDKGNVLRWIGEINR"

```

ORIGIN

```

1 gaaattaaac ttggaatagg aaaagtaaaa gaaaaagaaa tagaagcttg gtatattgat
61 gataaaaata acattaagta tcaagaatth aaacgatatt tgtattataa ttatagtata
121 tttttaggag gcgatgaggg cgttgggttt cattttgaat atgaggaaat attagattgt
181 ggagatgta gataaaaaat ttaaaagcat aatgagctta agataggaat ataaaatgag
241 caaaaacatt aaaacacaag aagctaaatt agacttaatc actaaattht tttgactatg
301 ctaatatagc agatgctagt tatgcaatgc ttgatttaat gaatgagaat gatgagaatt
361 caacccttgc acctttatgg ctttatgcag atggggtaac taatctaaaa aatcatagta
421 aaaggcaata aagtatgaaa tatattatat tgacttttat tctaggthta attgtatttg
481 tttcagtaaa aggttgthtt tatkctacaa gttatcgtgc thttatacca aaaagcttag
541 attccgagta taaagagtht gaaagattat gtaaagagga agtaggaaag gtagtatatg
601 caagacctat aaaacatggt ataaagthtg aagattthgt taactthcct tctacgagtg
661 ttagacgtgt tgctthtaagc agacatatgt atatgthgat agaaaatgth acaacaagag
721 aagacgaaat thtttactta catatagctg gthttgaata ttatacaggc tggacaagaa
781 aaagththtc tatgcatgat gattctaaaa aatatataag atgtgagcct thgctthtatg
841 gtaaaacttg gaaagaaat gctaagataa tggaaacaaa ggcattthgat aataaagaat
901 atataggcac agaagaatat ttacaatatt caccttatca ttatgagtat aatacactth
961 atcgccaaat agthtaathc aaacaaaaga aagagaatta atgatataata attacaaata
1021 ctctcttgga atctatgtha atgattgggg cthttatgat ggcagtgagg gaaaccctca
1081 tgtgttctta ggactaaaa gagagcaagt gcattgtggc gatatgcaaa thaaaaacac
1141 aatatataaa thaaacttgat thtagagata aagctthataa thgtctthtat aatacaggag
1201 ththaaatggg agatagthatt acattgtcaa thtattthggg aatgththtt tctattctth
1261 atthttgtht thttataaaa aactatatha thaatagctth gattgtctth gthgtcttht
1321 ctattataaa thattggath aagathaca thaaaagaatt thgthaaatct ththththta
1381 thctththtat thctththtt acagctattg thtatkgtatt thtactthact thtgatcttg
1441 aaactthctag agggctthgta thactthgthc thccagaaat thgaagaatta thcaccacaag
1501 agtataaagt acatgththt thcggaththt ththththtac aagthattggc thththgtacaa
1561 thcacaththt thactthcct thgtththtt aagctththt thththaaatgt thatagcacag
1621 gagaaaaacg caaaaaatha agththgthta thaggththgt thgtthaatcct thatthatha
1681 caagthtgta thgtgathata gaaaatctth aaagactatc thaaaattcac thctthattgg
1741 thggaththta aactthtatag thaaagathth atcacthaagc thgathththaa agatagggct
1801 thaatatgthc ththataatac aggathththaa atgggagata gcattacact thtatththt
1861 thgggctthgt thggaththt thagtgtctth actththgcaa gactththt thataactth
1921 gctgtgthta thtactththc ththththaaat thththgthga gaaththaat thaaaagaath
1981 gthaaatctth atthththgat atthththgtt atththththg cagaththaat thggagthatt
2041 thththcggct thaatathga thaatcctgch aaaththcact thctthththt agagththtaag
2101 caaththaccat thgaagaatha cctagththt agctgtctth cattctthatt thtataact
2161 atggaaththt ththaatcac atthctththata thctctthgtt thththththt thththththt
2221 aathgththata gcacaggaga thaaacgcaaa thaatthagth gthththtatag gthththgtgt
2281 aathctththt thththattgt gaththththt aagththththg thaaatctthta aagactthca
2341 thaaaththcact cththattgtht thgathththaa actththththg thaaagaththth thcacthaagct
2401 thgathththaaa gthaaagctth thaatthgtgct thththththata gthgathththaaa thgggagathg
2461 caththactth thctthththt thgggthththgat thththththatt gctagthththta ctgththgcaag
2521 aathththctth atagctththaa gcgththcttht thgtctththct atththththaaat ththggaththaa
2581 gaththththata thaaagaththg thaaatctthta thththththata thctththththt

```

2641 ggctattggt atcgtatctt atcttactta tgatcttgaa acttctaggg gacttgtatt  
2701 acttggctcct ccagaagttg aaaaattatc accacaagaa tataaagcac ataattatct  
2761 taaatcttta acctttacaa ctatgttttt tttggcaatc acatctttta tacttccttg  
2821 tttattacaa gcttactttt ttaaagtgtt tagcacagaa gaaaaacgca aaaaattaag  
2881 ttggtttata gggtttgtgt gcaatatctt tttattaatt gtgagttttt ataagttata  
2941 tgaaaatcct taaagactat caaaaattca ctccttatgg tttggatttt agactttata  
3001 gtaaagattt tatcactaag cttgattttt aagataaagc ttataatgtg ctttatgata  
3061 caggagttta aatgggagat agtattacgc tttctatctt ttggggtttg attttgttta  
3121 ttgctagttt tactgttgca agaatttatc ttatagctct aagcgttctt attgtctttt  
3181 ctatctttaa ttattggatc aagattaata taaaagaatt tgtaaaatct tattttttaa  
3241 tatcttttat tatctttttt acagctattg ttatcgtatt ttatcttact tatgatcttg  
3301 aaacttctag agggcttgta ttacttggtc ctccagaaat tgaaaaatta tcaccacaag  
3361 aatataaagc acgtaattat tttggatttt taagtgggtat aactattatt tttttagcaa  
3421 tcacattttt tatactccct tgtttattac aagcttattt atttaaagtc tatagcacag  
3481 gagaaaaacg caaaaaatta agttggttta taggatttgt gtgcaatata tttttattaa  
3541 cggcgagtgt gtatgcatg tattaaaatc tttaaagact accaaaaatt cactccttat  
3601 ggtttggatt ttaaacttta tagtaaagat tttatcgcta agcttgattt taaagatagg  
3661 gcttataatg tgctttataa tacaggagtt taaatgggag aagatattac actttctatt  
3721 ttttgggggt tggtaggatt ttttttagg cttgttacta ttgatgcaat actttatatt  
3781 acagccttaa gcgttcttat tgtcttttct attataaatt attggattaa aattaatata  
3841 aaagaatttg taaagtctta ttttttagta ttttttacta tcttttttac agctattggt  
3901 atcatatctt atcttagcta tgatcttgaa acttctagag gatatgtaat gctcggctct  
3961 ccagaagttg aagaattatc accacaagaa tatatagtat ataagtgttc taaatcttta  
4021 atctttataa attttatttt ttttacaatc acatcttata tacttccttg tttattgcaa  
4081 gcttatttat ttaaacgcta tagcacagaa gaaaaacgca aaaaattaag ttggtttata  
4141 gggtttttat gcaatattat tatattaatt gcaagtgtgt atttgatgta tatatttatt  
4201 taaagactat caaaaattca ctccttatgg tttggatttt aaactttata gtaaagattt  
4261 tatcactaag cttgattttt aagataaagc ttataatgtg ctttataata caggagttta  
4321 aatgggagat agtattatgc tttctacttc tttaggtttg gtaggattta tttttgcttt  
4381 tactaatata aaatcttatc ttaccacttt aagtgttctt attgtctttt ctatctttaa  
4441 ttattggatc aagattaata taaaagaatt tgtaaaatct ttttttcaa tatattttat  
4501 tatctttttt acagctattg ttatcatatt ttatcttacc tatggatttg aaacttctaa  
4561 ggatcttgca ttgcttagct ctctagaagc taaagaatta tcaccacaag aatataaagc  
4621 acgtaattat tttggatttt tgacttgtat gactatgttt tttttagtaa tcacatttat  
4681 catacttctt tgtttattgc aagcttattt atttaaatgt tatagcacag gagaaaaacg  
4741 caaaaaatta agttggttta tagggtttgt gtgcaatatt attatattaa ttgcaagtgt  
4801 gtatttgatg tatatattta tttaaagact accaaaaatt cactccttat ggtttggatt  
4861 ttaaacttta tagtaaagat tttatcgcta agcttgattt taaagatagg gcttataatg  
4921 tgctttataa tacaggagtt taaatgggag aagatattac attttctatt ttttgggggt  
4981 ttttggattt tattcttgct tttactaata taaaatttta tcttaccact ttaagtgttc  
5041 ttattgtctt ttctatttta aattattgga ttaaaattaa tataaaagaa tttgtaaaat  
5101 cttatctttt aatatctttt attatctttt ttacagctat tattatcata ttttatctta  
5161 gctatgatct tgaattttat aaatcgcttg tattgcttga tcctctagaa attgaaaaat  
5221 tatcaccgca agaatataga gtgcgtaatt attttaaatt tttaaccttt gcaactatgt  
5281 tttttttagt aatcacattt attatacttc cttgtttatt gcaagcttat ttatttaa  
5341 gttatagcat aggagaaaaa cgcaaaaaat taagtgtggt tatagggttt gtgtgtaatg  
5401 ctcttatatt aattgcatg gtgtatgtgg tatatgaaaa tctttaaaga ctatcaaaaa  
5461 ttactcctt atggtttggg ttttagactt tatagtaaaag attttatcac taagcttgat  
5521 tttaaagata aagcttataa tgtgctttat aatacaggag tttaaatggg agatagtatt  
5581 gcactttcta ttttttgggg tttgatagga tttattctta cttgtagtgt tatagaattt  
5641 tatcttatag ctctaagcgt tcttattgtc ttttctattt taaattattg gatcaagatt  
5701 aatataaaaag aatttgtaaa atcttatttt ttaatatctt ttattatctt ttttatggct  
5761 attgttatcg ttttttatct tacttatgat cttgaaactt ctaggggact tgtattactt  
5821 ggtcctccag aaattgaaaa attatcacca caagaatata aagcacgtaa ttttttggat

5881 tttttaggcg gtataacttt ttttttttta gtaatcacat tttttatact tccttgttta  
5941 ttacaagcct atttatntaa atgctatagc acaggagaaa aacgcaaaaa attaagttgg  
6001 tttatagggt ttgtgtgtaa tcctatatta atggcgagtg tgtatgtgat gtattaaaat  
6061 ctttaaagac ttttaaaaaa tttaatatat ttgatataat atttatntat cttaaattat  
6121 tagagaaaaa atgaatagag aattatntat aacaagactt gcatttataa acaatgatga  
6181 aataaataaa ataaataaaa attcatctat tgcttattta aaagtcttat atcaatgtga  
6241 aaattccata gctgtaaatt atgataaaaa aagggtcttt cacctaaagc actactatca  
6301 ctcacagcct tgatcttgag gagggcttag gagaacaaag taaaaatcaa atagagttaa  
6361 aagaagctag attaagaatg tattataaag aacacaaaata tcaaaaagac aatctnttaa  
6421 tcactaattt atatctaaac gataccctat atcaaaaacga acaaggntta gataaattag  
6481 aattatctaa aatgattta ttcaatttaa atgatattaa tatactaaat actctntaac  
6541 aagactntag taaagattat gaattntaaag agtgtgagat tagactntgt atgcattntg  
6601 taaaattaat cttntatct cccaaaaaca ttgccaaagt ttataaaagt gctntataaag  
6661 aattntgaaa caaagatcta ggagcagggt atnttacaca gctacatgaa tatgataaaa  
6721 tcattaaaaa ttctntagaa gataagaaag aattntaacga atatcattta actntnttaa  
6781 ctctntctaa aatgcaaaaag attgattntg aaattntcaa aggtnttagat gagtntcttg  
6841 ataatgaaa tgtgtnttc tntaatntt atactaagga ttntntntat gcaataata  
6901 aagatatgct tataagtgat aatataaaaag atgatacaaa taccacacaa gctcacatca  
6961 atgaaaacta taacaatact caagaaatca tccctgataa tntntataaga atacaaacac  
7021 aagatnttag tggagagntt atcgagatag tntntgatga atntntaaagaa tgggaaaaat  
7081 catcaagcgg agctataaag cttntatntt ctctnttagg aggtatntgta gatgagntct  
7141 tagaatcact tgaaaatntc agcattatct gcgatntcct aacaatntct gntntcagntga  
7201 aaaatcctaa aatntcaaaa aatattntta agaaaaaatc caaatatntcc actntaaacag  
7261 aagtntataga gntntntaaa aataaataca atctntaacac ttctntaaagaa tntagactntc  
7321 gtagaagcaa gaatntntt tggntcaagg ataataaaca aataaaaagag atntntgntg  
7381 agattacaga tggntcagat atntntaaaag atataaatca agataaaactt gntagnttacta  
7441 taaaatntag aaaatntagat gatntaaacta ttataaaaatt aagacntaaa tccaaatntg  
7501 gcgnttcagc agtagaaaatt gacaagaaac ccgaagcaca agntntaaata cataatacaa  
7561 ggaatntntaa aaaatntat atcaaatntc tacagactnt cagntntnta tntntntntaga  
7621 gctntctntaa gaaatntntca acacaataaa agcctaatca aaaacntntct acgatntntga  
7681 atntntgaact tntntntacaga ttccaaatnt tacaanaaaca gacatntnttag agcattntntga  
7741 agaaactntt tntntaatnt caatagntag tntntagntat gataaatact tntgaatntntga  
7801 ttctntntnt tntntcgtntt tgctntgatag tntntaatnt atagntntgata atntntactaa  
7861 cccaactntc atntagntaat atntntaatat tatagntntcaa ctntntcctag cagntntntat  
7921 agaatntntgt atntntcngntt tgcaagataa gntagntntaa ttactntntcca atcaagntntga  
7981 taaatntntaa gctntntntat atntntntaga taatntntt tntactntgat cgactntntag  
8041 agatntntaa gatctntntag aaaaatntcc aatntntgagc gatntntgnt atntcatntc  
8101 taaatntntgt atntcngnt actntntntag atntacatnt tntntntntcaa taacagntntaa  
8161 agntcaaaaa tatctntntat aatctntntag tctntaaatnt tntntcaaat acaagntntt  
8221 agaagntntag atntgatnta agntntaatnt gctntntntgt atntntgagnta tntntatagnt  
8281 agntntntnt gntntntacat ntnt

//

LOCUS DMACINML\_18 5497 bp DNA linear 16-DEC-2020  
DEFINITION Campylobacter species strain strain.  
ACCESSION  
VERSION  
KEYWORDS .  
SOURCE Campylobacter species  
ORGANISM Campylobacter species  
Unclassified.  
COMMENT Annotated using prokka 1.13 from  
<https://github.com/tseemann/prokka>.  
FEATURES Location/Qualifiers  
source 1..5497

```

/organism="Campylobacter species"
/mol_type="genomic DNA"
/strain="strain"
gene complement(692..1810)
/locus_tag="DMACINML_01789"
CDS complement(692..1810)
/locus_tag="DMACINML_01789"
/inference="ab initio prediction:Prodigal:2.6"
/codon_start=1
/transl_table=11
/product="hypothetical protein"
/protein_id="Prokka:DMACINML_01789"
/translation="MNENIYGSLEFYSKETQSTPSDKRDLGVFGDVAPYALGITEGFA
TKAFEKEIVKFGIEDNSHIARMMHSKIIMNFGILNFFLAKAEGKSNVRALTETSVGV
SITIIIMNETPIGATIEKGSEHVAKQTLTQTSRVASNAATKIASRVASNIAARAGVSIL
SRIAAGAATGAAVGSSFPIVGTVVGAVVGTLVAGFFNDLIFGDEDEELKKQEAKKEYL
EEKLDEKMHKIINYLITHQYIELRVLNEDEAEKLCKEISDINSAYFKTILLMLSFPYY
LDKDEQSYKEAQEKNPTIIRIQPIANKAVKNYIDDFMEGAYDNLDPENYEVAFEEDTG
IPYDEADEDEFEDWFIKNVLYHDDLSEIYKILKSLVKD"
gene complement(1803..2441)
/locus_tag="DMACINML_01790"
CDS complement(1803..2441)
/locus_tag="DMACINML_01790"
/inference="ab initio prediction:Prodigal:2.6"
/codon_start=1
/transl_table=11
/product="hypothetical protein"
/protein_id="Prokka:DMACINML_01790"
/translation="MSEINNTEIKEQDTQDEIIEWEGKKHIPSFLFWITYIVLLCFA
LYLFPRLFNPSKEIDYKWFIVFFFTLLVIYALAQKIYRMANIKRIYITKEKLVIEYYI
KNDLVFPLGTFVYYRRLSFVLTPGHIVIYTFGDKVKEYLEPGLFSDGDDPTKDCFER
INAIKPHVMPYLLSLSDEEFEKIIFHVS GFSEIDTTF LKEAMELRKEKKDE"
gene complement(2492..3130)
/locus_tag="DMACINML_01791"
CDS complement(2492..3130)
/locus_tag="DMACINML_01791"
/inference="ab initio prediction:Prodigal:2.6"
/codon_start=1
/transl_table=11
/product="hypothetical protein"
/protein_id="Prokka:DMACINML_01791"
/translation="MSEINNTEIKEQDTQDEIIEWEGKKHIPSFLFFWITYIVLLCLF
LYLFPRLFNPSKEIDYKWFIVFFFTLLGIYAFARAIYKMANIKRIYITKEKLVIEYYI
KNDLVFPLGTFVYYRKISYSLSPGHIVIYTFGDKVKEYLEPSLFS DGDDPTKGC FER
INAIKPHVMPYLLSLSDEEFEKIFFHV NATSKIDTTF LKEAMELRKEKKDE"
gene complement(3140..3823)
/locus_tag="DMACINML_01792"
/ gene="tssI1_2"
CDS complement(3140..3823)
/locus_tag="DMACINML_01792"
/ gene="tssI1_2"
/inference="ab initio prediction:Prodigal:2.6"
/inference="similar to AA sequence:RefSeq:AOH52008.1"
/codon_start=1

```

```

/transl_table=11
/product="type VI secretion system, secreted protein"
/protein_id="Prokka:DMACINML_01792"
/translation="MPNDELVQHNFTQRILNDKDKSKVDGIYNERIKKVHTQTIDLAKN
VNVGGEYL TNVGLSKDTIVGLSNTLVNGVDNKVRIAKNSHEFVGENKDIEIGANQNTI
IHKDEIRNVKGENKLLIEKSLTQTIEKEFFLNVDHQLNSAHIQDNTSLKSNMQTKIEE
QYSLESENSTFDQFQDCGVKAGNQILHQVGDGTQIVTKKDCVVIKAGGVEVIIDSNGLV
VKGGEVKAE"
gene      complement(3813..4463)
          /locus_tag="DMACINML_01793"
CDS      complement(3813..4463)
          /locus_tag="DMACINML_01793"
          /inference="ab initio prediction:Prodigal:2.6"
          /codon_start=1
          /transl_table=11
          /product="hypothetical protein"
          /protein_id="Prokka:DMACINML_01793"
          /translation="MFETTKNLEYKKEALKIILASEGFKKLPYNDRAKNDNSGYLTIG
YGINLQIRNWL IATLNELGLFGNIANLNSIADINALDNKDNKAMIDEFYNITKQVITD
TTINNVR IQLNLLKKYNGASSASFEITKEQGLNIKEIVSETIFNGISAVNDKTLKID
KETNEYAGILSYAFNVGNNSVKYFFDECKKDKDNRF LIFFTLR YGVN FLLNNDNAK"
gene      complement(4478..5467)
          /locus_tag="DMACINML_01794"
CDS      complement(4478..5467)
          /locus_tag="DMACINML_01794"
          /inference="ab initio prediction:Prodigal:2.6"
          /inference="similar to AA sequence:RefSeq:CKG88098.1"
          /note="Uncharacterized protein conserved in bacteria%2C
putative lipoprotein"
          /codon_start=1
          /transl_table=11
          /product="hypothetical protein"
          /protein_id="Prokka:DMACINML_01794"
          /translation="MLAISANAQSPKEAKPSFDCAKATTKVEKIICSDESEELKNLDR
YMAEVYTQLRKELKISKFPDKEKRLKDLLDSQRAFIKNDKVN SITGAYEERITQLLK
LLGEVLDSNNKELCEYARKDQFDENKWQEVSPSVNPPFSIGFCAFGANNRYSVYSWYC
TEKKEVIKEAMAKAVKEKEFDYAFPFVFKRKIDINNDGVLDNVILSQGYFSALWIYK
NGKLDKASGKIYGD DLHFSGAKTEEKVCM EYEVPCMAL TTYALPSNKVSGILRSSEF
PILSYLTYGVMEFQGNKYITLWSGRFNFDENSTYPETRIYLLLEGNKRELKCTY"

```

ORIGIN

```

1 cgacaattag ccgcatttac atcagctcca tatttgatta gcacttccac gcaagctcct
61 ataggtttct catcagattc tgcagcttga tgtaaaaggg tttctcctgc accactaaag
121 ctaaattcat tttctgtttt aatacttctc atattaggat ttgctcctag ttttaaagct
181 tcttctaaat aatttgcattg attttagcaat atccaaacat gcaaaggagt atcgccactt
241 tcttcattat aagtttcaaa tgtgcatcct tttttaaaaa aatactctat tacttcttta
301 ttttttccat ctctatcgat atatctactg agtgcattgt atccaaagtg tacttcatcg
361 gctttaagtc ctaggctttc aaaatactcc atcatttcaa aacttttact tttatcataa
421 gcaagtcctg cacaagctaa agtgatagca gtatcgataa tagctctttt gttttctcta
481 tcccaataag gtgtatagca tttttcaaag aatatttcag gtacaggata gtcttttaaa
541 aattctttta cttcttcaag tttgttagcc tctacaagat cataaaattc taaacataat
601 tcttctaaat attcttctga agaattttct tcaaaattta ttaattcttc taatgttttc
661 attgtttttc cttttattgt aaatttagtt tttaatcttt aacaagtgat tttagatatt
721 tataaatctc acttaaatca tcatgataaa gcacattttt aataaaccaa tcctcaaatt
781 catcctcatc tgcttcatca taaggatgac cagtatcttc ttcaaaagca acttcatagt

```

841 tttctggatc taaattatca tacgcacctt ccataaaatc atctatataa ttttttactg  
901 ccttatttagc tatggggtgt attctgatta tagttggatt tttttcttga gcttctttat  
961 aactttgctc atctttatct aaataataag gaaaacttag catcaaaaga atgggttttaa  
1021 aataagcact attaatatca cttatttctt tacaaagctt ttctgcttca tcttcattta  
1081 acaactcttaa ttctatatac tgatgagtga tgagataatt gatgatttta tgcatttttt  
1141 catctaattt ttctctctaaa ttttttctt tggcttcttg tttttttaat tcctcatctt  
1201 catcgccaaa aattaagtca ttaaaaaaac ctgctacaag tgttcccacc actgcaccca  
1261 ccaactgtccc aacaatagga aagctcgagc ctacagctgc tccagttgct gcacctgcgg  
1321 caatacgaga aagtatggat acgccagctc tagctgcgat attagatgct actcttgagc  
1381 tagctatctt ggttgcgga ttagaagcaa ccctgctggt ttgagttaag gtttgtttg  
1441 caacatgttc gctacctttt tctattgttg ctccaatagg agtttcattc atgattatag  
1501 tgatactaac accaacgctt gtttcagtca aagctcttac attggatttt ccctctgctt  
1561 tagccagaaa aaaattcaat attccaaaat tcattattat tttagaatgc atcattctcg  
1621 caatatgcca attatcttct atgccaaact tcactatttc tttttcaaaa gcttttagtag  
1681 caaaaccttc tgtaatgcct aaggcataag gagcaacatc tccaaatact cctaaatccc  
1741 ttttatcact aggagtgcct tgagtttctt tagaataaaa ctctaaactt ccataaatat  
1801 tttcattcat cttttttctc ttttctgagt tccattgctt ctttaaggaa agtagtatca  
1861 atttcgctaa aaccgcttac atggaaaatg attttttcaa attcttcac acttaagctt  
1921 aataaataag gcattacatg aggttttata atggcattaa ttctttcaaaa acaatctttt  
1981 gttggatcat cgccatcact gaataaacca ggttcaaggt attctttgac tttatctccg  
2041 aagggtgata tcactatatg tcctggagta agcacaaaatg acaggcgagc ataatacaca  
2101 aaaaaagttc ctaaaggaaa aaccaaacta tttttgatat aatactcaat cacaagtttt  
2161 tcttttgtga tataaattct ttttaatttt gccattctat agatcttttg tgcaagtgca  
2221 tatataacta aaagaaatgt aaaaaaaact ataaaccatt tataatctat ttctttgcta  
2281 ggattaaata atctaggaaa caaataaagc gcaaaacata aaagcacaat atatgttatc  
2341 caaaaaagca aaaacgaagg tatatgcttt tttccttccc aaatgatttc atcttgggtg  
2401 tcttgctctt tgatttctgt gttattgttt atttcactca tttttatcct ttaaataagt  
2461 tttaatctct tgtatataaa ataaaatatt ttcattcatc ttttttctct tttctgagtt  
2521 ccattgcttc ttttaaggaaa gtgggatcaa ttttactagt agcgtttaca tggaaaaaga  
2581 ttttttcaaa ttcttcatca ctttaagctta ataaataagg cattacatga ggttttataa  
2641 tggcattaaat tctttcaaaa caaccttttg ttggatcatc gccatcactg aataaactag  
2701 gttcaaggta ttctttgact ttatctccga aggtgtatat cactatatgt cctggagaaa  
2761 gtgaatatga aattttacga taatacacia aaaaagtcc taaaggaaaa accaaatcat  
2821 ttttgatata atactcaatc acaagttttt cttttgtgat ataaattctt ttaatatttg  
2881 ccattttata gatcgctcgt gcaaatgcat atatgcctaa aagaaatgta aaaaaacta  
2941 taaaccattt ataacttatt tctttgctag gattaaata tctaggaaat aaataaagaa  
3001 aaagacataa aagcacaata tatgttatcc aaaaaaacia aaacgaaggt atatgctttt  
3061 ttccttcca aatgatttca tcttgggtgt cttgctcttt gatttctgtg ttattgttta  
3121 tttcactcat ttttatcctt tactctgcct taacctctc accttacc acaagtccat  
3181 tagagtctat aatcacttct actccacctg ctttaattat aacacaatct ttcttggtaa  
3241 caatttgagt atcacctact tgatggagga tttgattgcc tgcttttact ccacaatctg  
3301 tttgaaagtc aaaagtagaa ttttctgatt ctaaagaata ttgctcttct atctttgttt  
3361 gcatggaatt agactttaaa gatgtgttat cttgtatatg ggcggataaaa ttttgatgaa  
3421 cattaaggaa aaattctttt tctattgttt gggttaaaga tttttctatt aataatttat  
3481 tttctccctt cacattcctt atctcatctt tatggataat agtattttga tttgcaccta  
3541 tttctatata tttgttttct cctacaaact catgagagtt ttttagctatt cttactttat  
3601 tatctactcc tacatttaaa gtattgctta atcctactat agtatcttta gataagccta  
3661 cattagttaa gtattctcct cctacattga catttttagc taagtctatg gtttgagtat  
3721 gaaccttttt aatcctttca ttataaattc catctacctt agaactttta tcatttaaaa  
3781 ttctttgagt gaaattatgt tgcactaatt catcatttgg cattatcatt atttaaaaga  
3841 aaatttacac catacctcaa ggtaaaaaat atcaaaaatc gattatcttt atctttttta  
3901 cattcgtcaa aaaaatattt cacagaatta tttccaacat taaaagcata agataaaatt  
3961 cctgcatatt catttgtttc tttatctatt tttaaagttt tctcgttaac tgcagaaatg  
4021 ccattaaaga tagtttcaga aactatttct ttaatattta atccttgctc ttttgtgatt

```

4081 tcaaaactag cactactagc gccattatat ttctttaata aattattaag ttgtattctc
4141 acattgttta tggttgtatc cgttataact tgttttgtaa tattgtaaaa ttcacatc
4201 atagctttat tatctttatt atctaaagca tttatatctg caatagagtt taaatttgc
4261 atattcccaa ataatcctag ctcatttaat gtagcaatca accaatttct tatttgtaaa
4321 ttaataccat agcctatagt taaatatcca ctattgtcat tttttgctct atcgttatat
4381 gggagcttct taaaaccttc gctagccaat ataattttta atgcttcttt tttatattca
4441 agattttttg ttgtttcaaa cattaattat ttccttttta ataagtgcac tttagctctc
4501 ttttattacc ttctagaaga taaatgcgtg tttctggata agtagaattc tcatcaaaat
4561 taaatctacc actccaaaga gtaatataat ttttgccttg aaattccata actccataag
4621 ttaaatactg taatatagga aactcagaac ttcttagtat tcctgaaact ttattacttg
4681 gcagagcata tgtagtaagt gccatgcaag gcacctcata ttccatacaa actttttctt
4741 cagtttttgc tccactaaaa tgtaaatac ctccatagat tttaccactt gcttttgcac
4801 ctactgtacc atttttatat atccaaagtg cactaaaata ttgcccttgt gaaagaatta
4861 cattatctaa taccatca ttattaatat caatttttct tttaaaaaca aaaggaaatg
4921 cataatcaa ttctttttct ttgacagctt ttgccattgc ttcttttatg acctctttt
4981 tttctgtgca ataccaagaa taaacgctat atctattatt tgctcaaaaa gcacaaaaac
5041 ctatactaaa aggaggattg acagaggggg aaacttcttg ccatttattc tcatcaaatt
5101 gatcttttct tgcatattca cataattctt tattattaga atctagcact tctcctagaa
5161 gttaagtag ttgtgtaatg cgttcttcat aagcacctgt tatagaatta acctatcca
5221 aatttttaat aaaagctctt tgtgaatcta aaagatcttt taatcttttt tctttatcag
5281 gaaacttaga gatttttaac tcttttctta attgtgtata gacttcagcc atatagcgat
5341 ctaaattttt taactcctca ctttcatcac tacatattat cttttcaact tttgtagttg
5401 ccttagcaca atcaaagcta ggttttagctt cttttgggga ttgtgcatta gcactaatgg
5461 ctaacattaa acacaatcct aaaactatta aaaactt

```

//

```

LOCUS      DMACINML_19          5176 bp    DNA        linear      16-DEC-2020
DEFINITION Campylobacter species strain strain.
ACCESSION
VERSION
KEYWORDS   .
SOURCE     Campylobacter species
  ORGANISM Campylobacter species
            Unclassified.
COMMENT    Annotated using prokka 1.13 from
            https://github.com/tseemann/prokka.
FEATURES   Location/Qualifiers
  source   1..5176
            /organism="Campylobacter species"
            /mol_type="genomic DNA"
            /strain="strain"
  gene     237..362
            /locus_tag="DMACINML_01795"
  CDS      237..362
            /locus_tag="DMACINML_01795"
            /inference="ab initio prediction:Prodigal:2.6"
            /inference="similar to AA sequence:RefSeq:AVS37480.1"
            /note="DUF2974 domain-containing protein"
            /codon_start=1
            /transl_table=11
            /product="hypothetical protein"
            /protein_id="Prokka:DMACINML_01795"
            /translation="MSLSTHTTMMTLTDINAIPILADIAPYYRQLAYNNIESKESA"
  gene     363..899
            /locus_tag="DMACINML_01796"

```

CDS 363..899  
 /locus\_tag="DMACINML\_01796"  
 /inference="ab initio prediction:Prodigal:2.6"  
 /codon\_start=1  
 /transl\_table=11  
 /product="hypothetical protein"  
 /protein\_id="Prokka:DMACINML\_01796"  
 /translation="MIRLKKILKISSFILLPLMIIWNMTFGWGWFPYSLQPSYHEFK  
 EMCKLDPEIQANGGKIDKEYYNKLLAYFNTNFEEVLQGNKGMANVSNSQYIQRENIE  
 LYSFNEDRDKGRLSFSGLDIEKNKTTNEILPLKKVFFYVEWHNRRKYLTTKSVASYE  
 FEWRENYENCAYFKKEIK"

gene 896..1288  
 /locus\_tag="DMACINML\_01797"

CDS 896..1288  
 /locus\_tag="DMACINML\_01797"  
 /inference="ab initio prediction:Prodigal:2.6"  
 /inference="similar to AA sequence:RefSeq:CKG86955.1"  
 /codon\_start=1  
 /transl\_table=11  
 /product="methyltransferase small"  
 /protein\_id="Prokka:DMACINML\_01797"  
 /translation="MNNKEQIKKLRDNAELAWASYGYFDFIDKQYSFDEKDKDKFKTL  
 YAKINDLKKSDKQNAKATYTDILNMEYNSLFDGDFSPLQAKQFFSRYDLLKHCNPNT  
 NSGFSATLFYDKQKDEFVVGFRGTECGF"

gene 1706..2083  
 /locus\_tag="DMACINML\_01798"

CDS 1706..2083  
 /locus\_tag="DMACINML\_01798"  
 /inference="ab initio prediction:Prodigal:2.6"  
 /inference="similar to AA sequence:RefSeq:CKG86895.1"  
 /codon\_start=1  
 /transl\_table=11  
 /product="methyltransferase small"  
 /protein\_id="Prokka:DMACINML\_01798"  
 /translation="MSKDYKDYFIYDDSLVFLKLNGEFREIQTQNFQAKRYTIKFHQ  
 PNTFSGFSATLFYDIQKDEYIASFRGTEGIVSMDAFADIGLTFGKGDFQANALKQFLD  
 IAPILNNIDSSKITFVGHSLVGI"

gene 2234..2509  
 /locus\_tag="DMACINML\_01799"

CDS 2234..2509  
 /locus\_tag="DMACINML\_01799"  
 /inference="ab initio prediction:Prodigal:2.6"  
 /inference="similar to AA sequence:RefSeq:CKG86933.1"  
 /codon\_start=1  
 /transl\_table=11  
 /product="hypothetical protein"  
 /protein\_id="Prokka:DMACINML\_01799"  
 /translation="MGILKKVYIVWGVFWGIIIFLSSLYAYFSDIEFFGDMLKIAFFI  
 YSYPLLPYISYLTQETIKSKNILLYFALFCFILLYFSLSREDFLFM"

gene 2761..3003  
 /locus\_tag="DMACINML\_01800"

CDS 2761..3003  
 /locus\_tag="DMACINML\_01800"  
 /inference="ab initio prediction:Prodigal:2.6"



```

/codon_start=1
/transl_table=11
/product="hypothetical protein"
/protein_id="Prokka:DMACINML_01800"
/translation="MKILKSLYIIWMIFWGFAGAILGYMGYDATFTKMFFFLVILYLF
PLLPHYFYLIYKKARNTKNIFVAIYCYLLLFVATID"
gene 3214..3540
/locus_tag="DMACINML_01801"
CDS 3214..3540
/locus_tag="DMACINML_01801"
/inference="ab initio prediction:Prodigal:2.6"
/codon_start=1
/transl_table=11
/product="hypothetical protein"
/protein_id="Prokka:DMACINML_01801"
/translation="MNTLKKIYIIWGMFWTIGLGIFVPTAHGFDSMDFVDFFILALQF
IAIIWLPPLLIFNIVYFVIKKERKYIINTLWILLYPIALILYMFYHNSFYVTLYI
FLSLFK"
gene 3654..3959
/locus_tag="DMACINML_01802"
CDS 3654..3959
/locus_tag="DMACINML_01802"
/inference="ab initio prediction:Prodigal:2.6"
/codon_start=1
/transl_table=11
/product="hypothetical protein"
/protein_id="Prokka:DMACINML_01802"
/translation="MGVFRKFYIVWVFCISGFAISPAVGHNPNRVYEFFVMLGWIIF
PLILLMLYRFFSLCEIKFLYIALLLLLLYPIALILYCMFYHNSFYVTLYIFLSLFK"
gene 3969..4118
/locus_tag="DMACINML_01803"
CDS 3969..4118
/locus_tag="DMACINML_01803"
/inference="ab initio prediction:Prodigal:2.6"
/inference="similar to AA sequence:RefSeq:AAW35443.1"
/note="conserved domain protein"
/codon_start=1
/transl_table=11
/product="hypothetical protein"
/protein_id="Prokka:DMACINML_01803"
/translation="MKEKINKLRDYAELAWASCFYFDLKGILQENETIVTLSELVSL
SYNGN"
gene 4328..4798
/locus_tag="DMACINML_01804"
CDS 4328..4798
/locus_tag="DMACINML_01804"
/inference="ab initio prediction:Prodigal:2.6"
/inference="similar to AA sequence:RefSeq:CKG86435.1"
/codon_start=1
/transl_table=11
/product="hypothetical protein"
/protein_id="Prokka:DMACINML_01804"
/translation="MQIPIYSKLLKAKLESKGIDNISSGQIAWFVCSLILALVTYIILT
FHYYISYGYDKNFLLLIFDRNAMELFIIYSCIMFNLLYIYNAIPLVLSAVFIFLA

```

gene FYFSSLSLFIVGCCGMGVFFLISIFKRKLIPSVLLFTMGYICSYLLLHAIGTYH"  
 4809..5018  
 /locus\_tag="DMACINML\_01805"  
 CDS 4809..5018  
 /locus\_tag="DMACINML\_01805"  
 /inference="ab initio prediction:Prodigal:2.6"  
 /inference="similar to AA sequence:RefSeq:CKG86410.1"  
 /codon\_start=1  
 /transl\_table=11  
 /product="hypothetical protein"  
 /protein\_id="Prokka:DMACINML\_01805"  
 /translation="MKYCVTIYIDEFLEYEILVSLYNGKGLDFTHAFLGLTKDKSPDE  
 LDKIDEELRQEYLKNKEFKLIKSIK"

ORIGIN

```

1  tatatactta  taatgcacct  ggagctagaa  agataatacc  tccttatgat  tatatagtca
61  aactctttat  atttcacagt  aaagaacaac  aagaaagatt  tataaaagaa  gaaatagaaa
121  atatagcaaa  tagagcaaga  gatttaggca  aagataatat  tttcttagaa  agtaagatgc
181  gaaagatatt  acacaagata  atccaagaaa  aacaaagtca  atactatggg  ataataatga
241  gtctttctac  tcatacaaca  atgatgacac  ttgatattaa  tgccattcct  attttagcag
301  atattgcacc  atattataga  caacttgctt  ataataatat  agaactctaa  gagagtgcac
361  aatgataag  gcttaaaaag  attctaaaaa  tatcaagttt  tattctactt  ctttgatga
421  ttatatggaa  tatgacattt  ggttgggggt  ggtttgtgcc  ttatagccta  caaccgagtt
481  atcacgaatt  taaagagatg  tgtaagctag  acccagagat  ttatcaagct  aatggtggta
541  agatagacia  ggaatactat  aataaattat  tagcttattt  taacacaaat  tttgaagaag
601  ttttacaggg  aaataaagga  atggccaatg  tttcaaatag  tcaatatatc  caaagagaaa
661  atatagaatt  atatagtttt  aatgaggata  gagacaaagg  gcgtttatcg  tttagtctag
721  gattggacat  agaaaaaaat  aaaactacta  atgaaatttt  accattaaaa  aaagtttttt
781  tctatgtaga  atggcataat  agaaggaagt  atcttacaac  aaagagtgtt  gcttcttatg
841  aatttgaatg  gcgtgaaaat  tatgaaaatt  gtgcttattt  taaaaaggaa  ataaaatgaa
901  caataaagaa  cagattaaaa  agcttagaga  caatgcagaa  ctagcttggg  ctagttatgg
961  ttattttgac  tttatagaca  agcaatatag  ctttgatgaa  aaggataaag  ataagtttaa
1021  aactttatat  gcaaaaataa  atgattttaa  gaaaagcgat  gaaaaagtgc  aaaatgccaa
1081  agctacctac  accgacattc  tcaatatgga  atataattcc  ttatttgatg  gcgacttctc
1141  cccactccaa  gctaaacaat  tcttttctcg  ctatgattta  ttaaaacatt  gtcctaatac
1201  aaattcaggt  ttttctgcta  ctttatttta  tgataaacia  aaagatgaat  tcgtgggtggg
1261  atttagggga  acagaatgcg  gattctaaaa  atactttata  tttgctggat  tatatttttt
1321  atctttgctt  ggataatata  acctttaatt  gggcataatc  cagatagatt  taaggaattt
1381  ctcatagtga  ttggatggat  aattttgctt  ccaatagtga  acaatctatg  gttattttta
1441  ataacaagaa  ttaaaaaata  tttgataagg  ttttttctat  tattgtttata  ttgtccattg
1501  gcaattttat  tatactttat  atttgattaa  aaggaaaaaa  tatgaagcaa  taaatcaaga
1561  atcttagaga  ctatgctgag  ttatcttggg  caagctattt  caaccttatc  tatattgatg
1621  acaaaaaact  aatgatttca  caataggaac  agaaagaatc  ttaaaagatg  gagaaaatat
1681  agaaaaatth  gaatattata  aagcattgtc  taaagactat  aaagattatt  ttattttatg
1741  tgattcggtt  gttttttatc  taaaactcaa  tggtgaattt  agagaaatcc  aaacacaaaa
1801  ttttgcaaaa  cgctatacaa  tcaaatttca  ccaacccaat  acttttagtg  gtttttctgc
1861  tacacttttt  tatgacattc  aaaaagatga  gtatattgct  agttttcgag  gaacagaagg
1921  aattgtaagt  atggatgcat  ttgccgatat  aggacttact  tttggtaaag  gagattttca
1981  agctaatgcc  ttaaaacaat  ttttattaga  tatagcacct  attctaaata  atatagattc
2041  tagtaaaatt  acctttgtag  gacattctct  ggtgggtatt  tagctcaaat  ggctttgata
2101  tattgtgatt  aaatataaag  atttatactt  ttaatactct  tagtatttac  gtttgaaatg
2161  ttcctagtgt  ggttatattt  tgatttttaa  aaaagtagga  taattttatt  aaaaatatta
2221  aaaagggaaa  taaatgggta  tattaaaaaa  agtatacatt  gtttgggggg  tcttttgggg
2281  aattattttt  ttgttttagt  ctttatatgc  ttattttagt  gatatagaat  tttttggtga
2341  tatgttaaag  attgcatttt  ttatatattc  ttatccattg  ttgccttaca  tatcatattt
  
```

2401 aacactacaa gaaactatta aatccaaaaa ttttttgctt ttttttgctt ttttttgctt  
2461 ttttttgctt tttttttcct tatctcggga ggatttttta tttatgtaat aatattaggt  
2521 atttatacaa tattatTTTT aataatatct attaaattta gaaaagaact ttcttattat  
2581 ctttctttat ttttttgat ttttttatac atttttttgt atctttttat tttttatata  
2641 gaattaaaaa atgagtaata aagctcaaat taacaatctc aaaaattacg ctaaacttgt  
2701 atagattggg ttttttaatt ttttaataat aatttaaatt tcaacaaaaa aggaagtagt  
2761 gtgaaaatat taaaaagttt atatattatt tggatgatat tttggggatt tggggctatt  
2821 ttaggttatt atatgggata tgatgcaact tttactaaaa tgttcttttt tcttgttata  
2881 ttatatcttt ttccattggt gccttatttt tattatttga tttataaaaa agcaagaaat  
2941 acaaaaaata tttttgttgc tttttattgc tttttattgt tttttgttgc tactattgat  
3001 taatagaaat aatagtaatt ttgagctgta ctttaattatt attgtgatac atattataat  
3061 atttgcaata atttatttaa ttaaaagaaa taaaaatgaa aactcaaatc aataatttaa  
3121 aagattatgc agaactagct tgggctagtt atttttattt taatttttaa aaaagtagaa  
3181 gaattttact aaaaatatta aaaaggaaaa taaatgaata cattaaagaa aatttatatc  
3241 atttggggga tgttttgac tattggactt ggaatttttg tgcctacagc acatggattt  
3301 gatagtatgg attttgtgga ttttttcata ctgctttac aatttatagc tataatttgg  
3361 ttgcctccat tactcatttt taatattgta tttttgtga taaaaaaga aagaaaatat  
3421 attataaata cattatggat attattgtat tatcctatag ctttgatatt gtattacatg  
3481 ttttattatc ataatagttt ttatgttaca ttatatattt ttttatcatt atttaaataa  
3541 aggataattt tgaagaaaaa aatcgataag ctaagagatt atgccgagct tgcacaagct  
3601 agttattttt attttaattt ttaaaaaagt aaaaatatta aaaaggaaaa taaatgggtg  
3661 ttttctgtaa gttttatatt gtttgggtag tttttgtat aagtggattt gctatttctc  
3721 ctgctgtagg gcataatcca aatagagtgt atgaattttt tgtaatgcta ggttggatta  
3781 ttttcccttt aattctatta atgctttatc gctttttttc tctttgtgaa ataaagtttt  
3841 tgtatatagc attgctattg ttactttatt atcctatagc tttgatattg tattgcatgt  
3901 tttattatca taatagtttt tatgtttacat tatatatattt tttatcatta tttaaataaa  
3961 ggataatttt gaaagaaaaa atcaataagc taagagatta tgcagagctt gcatgggcta  
4021 gttgttttta ttttgattta aaaggttata tattacaaga aaatgaaact atcgttactt  
4081 taagttagct tgtaagttta agttataacg gaaactgata attttattga ctcggttcaa  
4141 gacatagccc tatcttttaa tgacattatc caattttttc ctctttttaga ataagtagat  
4201 aaaataaatg aagctaaaga gccttgtgaa tttaatgatg atttcaagaa attttttctt  
4261 actgaaacaa tcaaattttt aaataaattg tcttataata gaataacttg ttatattagg  
4321 agtaaatgg caaattccta tttattctaa actcaaagca aaactagaaa gtaaaggaat  
4381 agacaatata tcgagtgggc aaattgcttg gtttgtgtgt agtttgattc ttgctttggt  
4441 gacttatatt attctaactt ttcactacat ttacattagt tatggtaaatt atgataagaa  
4501 tttattttta ttaatatttg atagaaatgc aatggaatta tttattatta tatattcttg  
4561 tataatgttt aatctattat atatttacia tgccattcct ttggttttat ctgcagtatt  
4621 tatatttttg gcattttatt tttctagttt aagcttggtt attgttggtt gttgtggcat  
4681 gggagtattt ttcttaatat ccattttcaa aagaaaactt atacctagcg ttttgttgtt  
4741 tactatgggt tatatttgcct catatctctt acttcatgca attggaactt atcattagga  
4801 ttttataaat gaagtattgt gtaacaattt atattgatga gtttttagaa tatgaaatat  
4861 tagttagtct ttataatgga aaaggtttag atttcaccca cgccttttta ggacttacca  
4921 aagataaaaag tcccgatgag ttagataaaa tagatgaaga attaagacaa gaatatctta  
4981 aaaacaaaga atttaaatta attaaaagta ttaagtagat tggttataat aaaacaattc  
5041 atctgtatta ggagtaaatt tgcaaatcc tattttattc aaactcaaag caaaactaga  
5101 aagcaaagga atagacaata tatcaagtgg gcaaatgctt tggtttgtgt gtagcgtggg  
5161 ttttttatc attcct

//

LOCUS DMACINML\_20 4471 bp DNA linear 16-DEC-2020  
DEFINITION Campylobacter species strain strain.  
ACCESSION  
VERSION  
KEYWORDS .  
SOURCE Campylobacter species

ORGANISM Campylobacter species  
 Unclassified.  
 COMMENT Annotated using prokka 1.13 from  
<https://github.com/tseemann/prokka>.  
 FEATURES Location/Qualifiers  
   source 1..4471  
           /organism="Campylobacter species"  
           /mol\_type="genomic DNA"  
           /strain="strain"  
   gene complement(1060..3961)  
           /locus\_tag="DMACINML\_01806"  
   rRNA complement(1060..3961)  
           /locus\_tag="DMACINML\_01806"  
           /product="23S ribosomal RNA"

ORIGIN

```

1 aatacaaaaa catatttaat tagcatataa aaaataaatt taatagataa aatatacaaa
61 gcaaacacca aatttaacaa ttaaactaaa aacagattaa aatgattaa accatcagtc
121 caacttagcc aaccaagctc acaaccaata aaccaccaa ataaagcaag tgtattcaaa
181 caataaaaaa acccaacaa atttaccagc ctagcaaatc aatatcttaa caccaccacc
241 caaaaaacca tacaatgaaa ttataaacca aacacaaaga caaccattaa accaaaaaca
301 gattaaagtg aacaactcta agcaagctaa ctataactaa gccataacca taactcagca
361 taaaaagaat gattaataca tataaaaaaca aattcaacat attgaaccaa actaaccaaa
421 cataataaag aacaattgac atataaaaaac aaattcaata tattaaaaca gtttcaataa
481 acataataaa aaagaacaat taatagaaaa acagattcaa taaacataaa gacaatttta
541 ttgtaaacc catctaaaac aacaataaaa acaaacatat gatttatata taaagtaagt
601 aaagaagaat taacaagtcc gcaatgagct actttcccc tgccagtaag gcgtagtatc
661 atcaccacg atgtgcttag cttcttggtt cgggatggag caaggcgttt ccacatctgt
721 ataatcacgg acattgttat ttaaattttc tttgaaagat ttaacttaag aataaagctt
781 ttatttttta ttctattttt ttattttttt gcttttcttc tattcttttt tatttctttt
841 gctttatatt cttttatttt ttaaatttta tctttcatct tatcaatgaa taaaattctt
901 actctctttg ataagctttt attttagaat acttaaaaaa caatgttaag agcaagttct
961 aatataaacc ctacttgcaa gatttccata tcactttgaa tgattattgt tattcaaagc
1021 tttactaaaa accttaacaa ggaagtgatg ctttattaaa gataagccaa acgctctatt
1081 agtactggtc agctaaagga ctttcatcca ttacacaccc agcctatcaa actagtagtc
1141 ttctagagag cttagagaag attcatctta gagttggctt cacgcttaga tgctttcagc
1201 gtttatcctt tccaaactta gctacgctgc gatgctcttg gcagaacaac agctacacca
1261 gtggtttggt caaccgggtc ctctcgact agggtcaaat ctcttcaatc ttcttacgcc
1321 cacggcagat agggaccgaa ctgtctcacg acgttctgaa cccagctcgc gtaccgcttt
1381 aatggcgaa cagccatacc cttgggacct gctccagccc caggatgcga tgagccgaca
1441 tcgaggtgcc aaacctcccc gtcgatgtga gctcttgggg gagatcagcc tgttatcccc
1501 ggggtacctt ttatcctttg agcgatggcc cttccacaca gaaccaccgg atcactaaga
1561 cggactttcg tctctgcttg acttgtatgt cttgcagtta agctggctta tacctttata
1621 ctctacgaac gatttccaac cgttctgagc caacctttgt aagcctccgt tattatttgg
1681 gaggcgaccg ccccagtcaa actaccacc agacattgtc ccacttgagg ataactcaag
1741 ctggttagct acccaaataa gaaagagtgg tatctcaaca atggctcata tacaactggc
1801 gtcataact caaagcctc cacctatcct gcacattctt atccaaatag cagtgtcaag
1861 ctgtagtaaa ggtccacggg gtctttccgt cttgccgagg gtaggaggaa ttttcacctc
1921 cactacaatt tcaactgata cctctttgag acagctccca tctcgttacg ccattcatgc
1981 aggtcgggat ttaaccgaca aggaatttcg ctaccttagg accgttatag ttacggccgc
2041 cgtttactcg ggcttcgatc aagagcttcg ctaatgctaa cccatcaat taaccttcga
2101 gcaccgggca ggcgtcacac cctatacatc ctcttacgag ttagcagagt gctgtgtttt
2161 tggtaaacag tcgggaggga ctctttgttg taagtttctt cgctttcgga gtaaataccta
2221 atacgaagcg aaccacacct tataccgaag atacggtgct attttgcaga gttccttaaa
2281 gagagttctt ccacgcgcct tagaatactc atcccacca cctgtgtcgg tttacggtac

```

```

2341 gggcaacatt agctaaactt agaaactttt cttggctcga cggcatcagg ggttcttcta
2401 tccatccgaa gacttcaaaa agcctttcag ttctcgggtg attcttatac ggatttgctt
2461 gtataagcac ctacgacctt agactagcac ttccatccgc tagccccctt agccctaagc
2521 gtccttccat cgcacactaa tgttgggtatt ggaatattaa ccaatttgcc atcgtctacc
2581 ctttcgggac tcgacttagg acccgactaa ccctacgatg acgagcatcg cgtaggaaac
2641 cttgggttta cggcgttaat gattctcaca ttaattatcg ctactcatgc ctgcatgctc
2701 acttctattc gctccagcac tccttaccgg tataccttcg acgcaaatac aacgctctcc
2761 taccacttga caaagtcaag tctacagctt cggctacttac tttagccccg ttatattttc
2821 cgcgcaaaat cactagacca gtgagctatt acgctttctt taaaggatgg ctgcttctaa
2881 gccaacctcc tggttgttta agtaacttca catcgttttc cacttaagta agatttaggg
2941 accttagctg gtagtctggg ttgtttccct cttgacgacg gattttatca ctcgccgctt
3001 gactgctgtg attacatata aggtattcgg agtttgatag ggtttggtag attggtgtat
3061 gccctagccc attcagtgtc ctacccccctt atattacgac acaacgctat acctaaatat
3121 atttcggaga gaaccagcta tcacgaagtt tgattggcct ttcacccta tccacaagtc
3181 atccgggggc ttttcaacgc ctatgggttc agtcctccac tagttcttac actagcttca
3241 acttgctcat ggatagatca cttcgtttcg ggtctgcagc atctgactaa gcgccctatt
3301 cagactcgct ttcgctacgg cttcgcgttt gcttaacctt gccagacacc acaactcgca
3361 ggctcattat gcaaaaggca gtccatcaca ctgtattgct acatagtgtc ctgaatgatt
3421 gtaagcaaat gtttcaggt tctatttcac tctgatcacc tcagttcttt tcacctttcc
3481 ctacgggtac ttgtgacta tcgatctggg attagtattt agggttggat cgtggctcgc
3541 ccagcttcag acaggatttc tcgtgtcccg ccctactcag gatactgcta gctaagggtt
3601 gtttttcgca tacgggacta tcaccctcta tggctatact ttccagaatg ttctgctaaa
3661 ctacactctt gcacattgca gtcctacaac ccccagtgca agcactgggt ttgccctctt
3721 gcgctttcgc tcgccgtac tgacgcaatc tctattgatt tcttttcttg agggtactaa
3781 gatgtttcaa ttcccctcgt tcgctcctat ataggtaatg tatactctta tacattgggt
3841 tgccccattc ggaaatctac ggatcaaagc ttcttgacag ctccccgtag cttatcgcag
3901 tctagtacgt cttcatcgc ctttaccagt caaggcatcc accattcgct cttagtagct
3961 tacctttttt accttcttta gcgtcaaggc aaagccttga ctaagaagca agctaaaggc
4021 ctaccccgcc aacctaaaag atattaggct gataaagtaa gttaaagact agtagtcttt
4081 cttgcttctt ctgctaagaa tatgcataaa agttagatat aatctaactt ctacctttt
4141 tattgattct aaaacgcatc acttcttgt taaagttttt atgataagac ttcattatct
4201 taagacggaa agcattcaaa cacttaatat aaatactaaa attcaattaa tatttaaac
4261 aagtcgtgag tttgaaactt atctttaat tataaacttt agatctaata ttctctttat
4321 tataaaaaat aaagatagtt aaaagatata agtaaaacca aagaaaagat aattgggttt
4381 tatcctttaa caagtcctgt aaaattgttt ttattaaac ttgcttgtga ctcttaacaa
4441 tgataattat aaagaacatt taggtttaa a

```

//

```

LOCUS      DMACINML_21          4080 bp    DNA       linear     16-DEC-2020
DEFINITION Campylobacter species strain strain.
ACCESSION
VERSION
KEYWORDS   .
SOURCE     Campylobacter species
  ORGANISM Campylobacter species
            Unclassified.
COMMENT    Annotated using prokka 1.13 from
            https://github.com/tseemann/prokka.
FEATURES   Location/Qualifiers
  source    1..4080
            /organism="Campylobacter species"
            /mol_type="genomic DNA"
            /strain="strain"
  gene      81..1004
            /locus_tag="DMACINML_01807"

```

CDS 81..1004  
 /locus\_tag="DMACINML\_01807"  
 /inference="ab initio prediction:Prodigal:2.6"  
 /inference="similar to AA sequence:RefSeq:CAL34922.1"  
 /note="hypothetical protein Cj0794"  
 /codon\_start=1  
 /transl\_table=11  
 /product="hypothetical protein"  
 /protein\_id="Prokka:DMACINML\_01807"  
 /translation="MGSDFNKAAGLPEDFKIHKSTLDEIERYNTDFNAHTANYLGVSS  
 YYSNIDMANTIKQYYNKFDEILNHTFNANKTSFTEVDLNSLPKGVSMVSGDFDFASP  
 LNLESKTITNYNTQEQYNEIEQLGILGHINTGLQPLNFTPQSMQTQNTSNKYTFNPD  
 MSVYPQNEGDSYSKEALFMSFLKSTGADV LKGGNTTMNPIVKSHKEAMAKESFDGSLA  
 SLDDIMTGKVD FASLLKGYAQDGLDADIYAMEKGVAVQNTSIGYGGAWFDNQFNQAK  
 ANGWKASSESINSYVGSIMDRLNNLIGQTRV"

gene 1150..2493

CDS 1150..2493  
 /locus\_tag="DMACINML\_01808"  
 /inference="ab initio prediction:Prodigal:2.6"  
 /inference="similar to AA sequence:RefSeq:CAL34922.1"  
 /note="hypothetical protein Cj0794"  
 /codon\_start=1  
 /transl\_table=11  
 /product="hypothetical protein"  
 /protein\_id="Prokka:DMACINML\_01808"  
 /translation="MSIFSINDNSNYNSILSQAKANKESKENS KISFANAFLKQNASK  
 LSDIESKNSQTLARSEILSNNALSNNSTNISNSSNTNLSINNATKTSSPNYDISS  
 EFKNSIYTLKYQADISNTSTNTAYGYSVDKDGVMGSDFNKAAGLPEDFKIHKSTLDE  
 IERVAENNFYDTKTKEYLGVDKYYDNIDMANTIKQYYDKFNDIINHTFNNTKTSFSE  
 ADLNSLPKGYSLNNKNLEIPYRLDKTITNYNTQEQYDEMEQLGTIAHINVLQPLN  
 FTPQSMQTQNL DQDSARDTFNPDMSFYPKNEGDSYSKEALFMSFLKSSGGAEVLAGGD  
 TKINPIIQSFREAMAKESFDGSLASLDDIMTGKVD FASLLKGYAQDGLDAGIYAMEK  
 GIKWQNHIGYGGGAWFERELNQAKANGWKASSESINSYVGSIMDRLNNLIGQTRV"

gene 2568..3893

CDS 2568..3893  
 /locus\_tag="DMACINML\_01809"  
 /inference="ab initio prediction:Prodigal:2.6"  
 /inference="similar to AA sequence:RefSeq:ADN90997.1"  
 /codon\_start=1  
 /transl\_table=11  
 /product="hypothetical protein"  
 /protein\_id="Prokka:DMACINML\_01809"  
 /translation="MSIFSINDNSNYGSILSQAKANKESKENS KISFANAFLKQNASK  
 LNEIQNANSQTLARSEVLNSTNTTNTSNTNFSISSKTNPNYDISSEFKNSIYTLKY  
 KQADISTSTNTAYGYSVDKDGVMGSDFNKAAGLPEDFKIHKSTLDEIERVAEYNVSDI  
 REYLGVDKYYSNIDMAETIKQYYNLF SNALSQSFPDKTSFSEADINSMPSGYAVGGD  
 KCMNFNDPNRMNITHL TDFSGALVSNVYQTSEQA EKADDLWADSGNMINGLKPETLG  
 LSLEEIKNVSQAKYECDFKPDMSFYPKNEGDTYTKEDLFMSFLKAQNGQPVESPKTTL  
 NPKVEAYNRAMAKESFSTTSVDLTDIMTGKVD FASLLKYELDRGRIAGELYMYEKGMS  
 PKQALGNWALDAEIKQALANGWKASSESINSYVGSIMDRLNNLIGQTRV"

ORIGIN

1 ctctaaaata taacaagta gatataagta atacttctac taatacagcc tatggttata

61 gtgtagataa agatggttat atgggaagtg attttaacaa agctgcagga ttgcctgaag  
121 attttaaaat acataaatct acttttagatg agatagagag gtataataca gattttaatg  
181 ctcatagcgc taattattha ggagtaagca gttattattc taatatagat atggcaaata  
241 ccataaaaca atattataac aaatttgatg agatattaaa tcacactttt aacaatgcga  
301 ataaaacaag ttttaccgaa gtagatttaa atagtttacc taagggtgta agtatgtcag  
361 taggagattt tgattttgct tcacctttaa atttggaaag caaaactata acaattatt  
421 acaacacca agaacaatac aatgaaatag aacaattagg aatattagga catattaata  
481 caggcttgca accattaat ttcactccac aaagtatgca aactcaaat acatcaaca  
541 aatatacttt taatcctgat atgtcagttt atccacaaaa tgaagatgga agttattcta  
601 aagaagcttt atttatgagt tttttaaata caacgggtgc tgatgtttta aaaggtggca  
661 ataccacaat gaatcctata gttaaatctc acaaagaagc tatggctaaa gaaagctttg  
721 atggatcatt agcttcctta gacgacatta tgacaggaaa agttgatttt gcaagtttat  
781 taaaaggcta tgcgcaagat gggttgcttg atgcagatat atatgcaatg gaaaaaggag  
841 ttgcttggca aaatacaagc ataggctatg gtggagcttg gtttgataat cagtttaatc  
901 aagcaaaggc taatggctgg aaagcaagca gtgaaagtat caattcttat gttggttcta  
961 taatggatag attaaataat cttataggac aaactagggt ttaagggtta tggataagta  
1021 ggtttcaaaa cttatttatt aaaaataaat aaatcatatt ttgttttatt ccaaagtgga  
1081 acaaattttg cttgtatgat tttaatatat ttagattgaa ggcagaaaaa tctaaatcaa  
1141 ggaattaata tgagtatctt tagcatcaat gataactcaa actataattc tatactttca  
1201 caagcaaaag ctaataaaga aagtaaagaa aattctaaaa taagttttgc taatgctttt  
1261 ttaaaacaaa atgccagcaa gtttaagtgat atagaaagta aaaattcaca aactctagca  
1321 agaagtgaag tattaagtaa caacaatgca ttaagcaata attcaaattc tactaatata  
1381 tcaaatagta gtaatactaa ccttagtatt aataatgcta ctaaaacaag ttctcctaat  
1441 tatgatatat caagtgaatt taaaaactct atttatactc taaaatataa acaagcagat  
1501 ataagtaata cttctactaa tacagcctat ggttatagtg tagataaaga tggctatag  
1561 ggaagtgatt ttaacaaagc tgcgggactt cctgaagatt ttaagataca taaatctact  
1621 ttggatgaga tagagagagt agctgagaat aacttttatg atacaaaaac aaaagaatat  
1681 ctagggtgagg ataaatatta tgataatata gatatggcaa atactatcaa gcaatactat  
1741 gataaattca atgatattat taatcactat tttaacgata ccaataaaac aagttttagc  
1801 gaagcagatt taaatagttt gcctaaagga tatagtttaa ataataaaaa ttagaaata  
1861 ccttatcgct tggaagataa aaccataaca aattattata acaccaaga acaatacgat  
1921 gaaatggac aattgggaac gattgcacat attaacgtgg gattgcagcc attaaatttt  
1981 actcctcaga gcatgcaaac tcaaaattta gatcaagaca gtgcaagaga tacttttaat  
2041 cctgatatgt cattttatcc aaaaaatgaa gatggaagtt attctaaaga agcttttatt  
2101 atgagttttt taaaatcctc tgggtggtgca gaagtttttag cagggtggtga tactaaaatt  
2161 aaccataa tccaatcttt tagagaagct atggctaaag aaagctttga tggatcatta  
2221 gcttccttag atgacattat gacaggttaag gttgattttg caagtttatt aaaaggctat  
2281 gcacaagatg gctggcttga tgcaggtata tatgcaatgg aaaaaggaat taaatggcaa  
2341 aatcacatag gttatgggtg tggagcttgg tttgaaagag agcttaatca agcaaaagct  
2401 aatggttggga aagcaagcag tgaaagtata aattcttatg ttggatctat aatggataga  
2461 ttaaataatc ttataggaca aactagggtt taagggttat ggataagtag gttaaaaact  
2521 ttttatcta tataaaaaaa tagaaaaatc taaatcaagg aattaatatg agtatcttta  
2581 gcatcaatga taactcaaac tatggttcta tactttcaca agcaaaagct aataaagaaa  
2641 gtaaagaaaa ttctaaaata agttttgcta atgctttttt aaaacaaaat gctagtaagt  
2701 taaatgaaat tcaaaatgca aattcacaaa ctctagcaag aagtgaagta ttaaattcta  
2761 ctaatacaac aaatactagc aataacacta attttagtat aagtagtaaa acaattctc  
2821 ctaactatga tatatcaagt gaatttaaaa actctattta tactctaaaa tataaacaag  
2881 cagatataag cacttctacc aatacagcct atggttacag tgtagataaa gatggttata  
2941 tgggaagtga ttttaacaaa gctgcaggat tgcctgaaga ttttaagata cataaatcta  
3001 cttggatgga gatagagaga gtggctgaat ataatgtttc tgatataaga gaatatctag  
3061 gtgtagataa atattattct aatatagata tggctgaaac cataaaacaa tactacaatc  
3121 ttttttctaa tgctttaagc caaagctttc caagtataa aacaagtttt agtgaagcag  
3181 atataaattc tatgcctagt ggatagctg taggtggaga taaatgtatg aattttaatg  
3241 atccaaataa tagaatgaat attactcatt taacagactt ttctggagct ttagtttcaa

```

3301 atgtctatca aacatcagaa caagcagaga aagctgatga tctttgggct gattctggaa
3361 atatgattaa tggtttaaaa cctgaaacct taggtttatc cttagaagaa ataaaaaatg
3421 tttctcaagc taaatatgaa tgtgatttta aacctgatat gtcattttat ccaaaaaaatg
3481 aagatggaac ttatactaaa gaagatttat ttatgagttt tttaaaagct caaaatggac
3541 aaccggtga gagtccaaaa actacactta atccaaaagt agaagcttac aatagggcta
3601 tggctaagga gagtttttca accactagcg ttgatttgac tgatatcatg acaggtaagg
3661 ttgattttgc aagtttatta aaatatgaac ttgatagagg tcgtatagct ggagagcttt
3721 atatgtatga aaagggcatg tctcctaagc aagctttagg caattgggct ttagacgctg
3781 agattaaaca agctcttgct aatggctgga aagcaagtag tgaaagtata aattcttatg
3841 ttggatctat aatggataga ttaaataatc ttatagggca gactagggtt taagggttat
3901 ggataagtag gtttcaaac ttatttatta aaaataaata aatcatattt tgttttattc
3961 caaagtggaa caattttgc ttgtattatt tataaaatat atttagattg aaggcaaaaa
4021 aatctaaatc aaggaattaa tatgagtatc tttagcatca atgataactc aaactatggt

```

//

LOCUS DMACINML\_22 3998 bp DNA linear 16-DEC-2020

DEFINITION Campylobacter species strain strain.

ACCESSION

VERSION

KEYWORDS .

SOURCE Campylobacter species

ORGANISM Campylobacter species

Unclassified.

COMMENT Annotated using prokka 1.13 from  
<https://github.com/tseemann/prokka>.

FEATURES

source

Location/Qualifiers

1..3998

/organism="Campylobacter species"

/mol\_type="genomic DNA"

/strain="strain"

gene

complement(357..965)

/locus\_tag="DMACINML\_01810"

CDS

complement(357..965)

/locus\_tag="DMACINML\_01810"

/inference="ab initio prediction:Prodigal:2.6"

/codon\_start=1

/transl\_table=11

/product="hypothetical protein"

/protein\_id="Prokka:DMACINML\_01810"

/translation="MTYILLIIISTILSYLILKFIYKIIFKSKSVSKFLVFLGSIG

LIIFYYPYSYYLEPSFYKFKKEICKLDPEIYQASGGKLDEEYNNKVLRYFDTSWDAMD

WKDIQQKSHINDYGDFLYKFKKYDDRIYHSFTLVFKNNQARKDNVKTIMFYASWRDLR

PFPSGNEGTFYLSGDRLSCEILSKSEYKKFKKEWKENNAKY"

gene

complement(1186..1959)

/locus\_tag="DMACINML\_01811"

CDS

complement(1186..1959)

/locus\_tag="DMACINML\_01811"

/inference="ab initio prediction:Prodigal:2.6"

/inference="similar to AA sequence:RefSeq:AJK71138.1"

/codon\_start=1

/transl\_table=11

/product="glutamyl-tRNA amidotransferase"

/protein\_id="Prokka:DMACINML\_01811"

/translation="MKEINEEKKALSLLLDSNFDGLKNNKIIDYSLELLLLSYRLSKI

SMDTSNINQLRETLINKILDITAKLSMCKEYDEKEIIFKYCLCVFIDESLMKNELF



INFWAHNTLTVRLFDETLGGNNFYDIASSWINNPFKFKDFLEFIYACLILGYKGYNE  
AKDKDEKIIHFCNNIATSLRPVYKTEEDLAFNKAYKIGLKEDIWQKFIRLYFKLIII  
VPVLIVLGVLSFAIFNLETNNLKVDNNISVLIKNLTHIK"

gene

complement(1956..2537)  
/locus\_tag="DMACINML\_01812"

CDS

complement(1956..2537)  
/locus\_tag="DMACINML\_01812"  
/inference="ab initio prediction:Prodigal:2.6"  
/inference="similar to AA sequence:RefSeq:AJK71139.1"  
/codon\_start=1  
/transl\_table=11  
/product="type VI secretion protein"  
/protein\_id="Prokka:DMACINML\_01812"  
/translation="MSMSIKIHPEFLYEFLEFQGELAAFSNEESFLDFIPYKHDNLY  
NTFLNMMNLRLLFSKITS PKYFIAKTSINGNGFYDFIFDNSGILEDAEIYFAIRADV  
TTEYLLNNFKIQSKIHTQSKIKNIVATQLEGLNVDQVPNPSSIPYLNQVYVYKIDKR  
DQLFKDFKNESIISMYLTNNIKNPDIIMWAVFQ"

ORIGIN

```
1 aagtagcaga aaaacctgaa tttgtattag gacaatgttt taataaatca tagcaagaaa
61 agaattgttt agcttggagt ggggagaagt cgccactaaa taactcatca tcaaagaagc
121 catcttttag ctttcctggt ttttcatctt taaaatattt gtattctatg ttgagaatat
181 caattagggt ggggaataca gattggggtt tatcttcttt aatatctcta aaatatttta
241 atcttttcca atccttacta ttttcctctg gcttataact ttcattagct aaatgaaaat
301 atccataggc tgcccaagca agttctgaat tgtcttttaa tgtttgtatt tgttttttaa
361 tattttgcat tattttcttt ccattctttg aattttttat attcactctt gcttaatatt
421 tcaaagcaac tcaatctatc tcccgaagaa taaaatcctg tcccctcatt acctgatgga
481 aatgggcgca aatcacgcca agaagcataa aacattatag ttttgacatt atcttttctt
541 gcttgattat ttttaaaaac taatgtaaaa gaatgatata ttctatcatc atatttttta
601 aatttgtaca agaaatctcc atagtcatta atgtgtgatt tttgctgtat atctttccaa
661 tccattgcat cccaacttgt atcaaaatac ctagcactt tattataata ttcctcatct
721 aatttaccac cactggcttg ataaatctct gggcttagct tacatatttc tttaaactta
781 taaaagcttg gctctaaata ataagaataa ggagtataat aaaagataat taaacctatg
841 cttccaagaa agactaaaaa ctttgaaca ctttttttag atttaaagat gattttataa
901 ataaatttta atataagata agaaagaata gtagaaatta taataagaag taatatatat
961 gtcattgggtt atctccttag actctctatt ttattaaaat taagatgtaa ttttgtagtt
1021 tagtgtagc agtataactt tttctttatc attaaaataa tagagcttgt ttttcatat
1081 attttatcc tttaaatttg catttgattt ttattctagc tgtaaataa tttttattta
1141 attttactca taacaaataa attgatattt aaaaatttaa tatctttatt ttatatgtgt
1201 taaatttttt atcaatacag atatatgtt atccacttta agattattgg tttctaaatt
1261 aaaaattgca aagcttaata ctccataac aatcaatac ggcaaatga taataagttt
1321 tttaaaatac aatcttataa atttttgcca aatatcttc tttaaaccaa ttttgtatgc
1381 tttgttaaaa gctagatctt cttctgtctt ataaactggt cttaaagatg tggcaatatt
1441 attgcaaaaa tggattattt tttcatcttt atccttagcc tcattatatt ttcctttata
1501 accaagaatc aaacaagcat aaataaattc caaaaaatct ttaaacttaa aaggattatt
1561 aatccaagat gatgcaatat cataaaaatt atttccacct aaggtttcat caaataatct
1621 tacagttaga gtattgtgag cccaaaaatt gataaaaagt tcatttttca tcaagctttc
1681 atctataaag acacaaagac aatatttgaa ttttaataatt tctttttcat catattcttt
1741 acacatgctt agtttagcgg ttatatctaa aattttatta atcaatgttt ctctaagttg
1801 attaatatta cttgtatcca tagagcttat ttttgaaagt ctgtaagaaa gcaaaagtaa
1861 ctcaaagaa taatcaataa ttttattgtt ttttaacca tcaaaatttg aatcaagaag
1921 taagcttaat gccttttttt cttcgtttat ttctttcatt gaaataccgc ccacattata
1981 atatcaggat tttttatatt gttggtcaag tacatactaa tgatactttc atttttaaaa
2041 tctttaaaca gctgatctct tttatctatt ttataataaa cgtaaccatt taataagga
2101 atactagatg gaacattagg tacttgatct acatttaagc cttcaagctg tgttgctact
```

```

2161 atatttttaa ttttactttg cgtatgtatc ttgctttgaa ttttaaaatt attaagtaga
2221 tattctgtag taacatctgc acgaattgca aaataaattt cagcatcctc taaaattccc
2281 gaattatcaa aaataaaatc ataaaaacca ttgccattaa tactggctct agctataaaa
2341 ttttaggac ttgtgatttt ggaaaataac aatcttaaat tattcatcat atttaaaaaa
2401 gtattataaa gattatcatg tttataagga ataaaatcta aaaaagattc ttcgttgcta
2461 aaagctgcaa gctctccttg aaattctaaa aatttttcgt ataaaaattc aggatgtatt
2521 tttatactca tactcatatc atagaagtga ttaaacaac ccttggtttt tatcaagata
2581 tcttacataa agaaattgat tattctcata tacattttaa ttatgaagaa caagagctca
2641 tctctcaata caatgaaagc gatttagaat ttatcacaag attagctcac aataatggaa
2701 tcttttttta tgaagatgaa aacactatct atttttgtga tgtgtataaa aatgtaaaaa
2761 ataaagaaat tgagtacaat cctaagtgtga ataataatct aaatcaagct tgtatttctt
2821 ctatctataa agagcaaagt ttaagaacta atgcttttac acattctagt atcaatgcta
2881 ttactccttt aaatctttta tctttacact ctagtaaagt tccttatgag caagaactta
2941 acaataaagc ttattataat gaacattttt atgagagtga atattctttt acaagaagta
3001 ttgattttaa gactaagcct tctcttaaag aaaaaagagc cttgatctta aatgaaagct
3061 tactagcaaa aagtaatatt tatcatctta gtttgggaga ttttatcact ttaaattata
3121 aggaatttaa tttgagtgga ttgagtgatg atgaagatac taaaagtcaa gataaagctt
3181 ctttgcttaa agactttatt attattgcca atactcaaat cttaatagat gatgctttac
3241 tagctaattc tatcaatact aatgatcatt taaattttaa agatttfaat ttaagtaagt
3301 cttattctaa tacttttaact ttattaaaaa agaataatct ctttactcca agttttaaag
3361 ctaagcctaa agcccctcat aatactcaag gtattgttat aggagagagt aaggatatag
3421 aaagtgagag aaatactatt tatactgatg agtatggaag ggtaaggta aggattaatc
3481 tttatgctaa tcaagaggaa ttagataata atcttttaag tgcaaacata aaaaccaata
3541 cttatgaaaa tacaacaact actgattcta aagataatac aaacttcaca aactcttcta
3601 atcatttacc aagcaatgct tataaatctt atcatcatac tcctttttta agagtagcaa
3661 caagtatagc aagcaatcat tcaggctttt ttcatactcc aagagtggga gatgaagtga
3721 ttgtttcttt ttagatgat gatatagata aaccctatgt gagctctagt ttgtataatg
3781 gggctaattc aagcttagta aatcttcctt ttaatgatca tcaaacttct ctttcttcta
3841 aaacatagg tgtaaatgaa gaaggttata atgaacttac cctctcaaat ataaaagata
3901 aagaacaaat ttattttaa gcccaaaagg attatgatga attagtccag cataatttca
3961 ctcaaagaat tttaaatgat aaagattcta gggtagat

```

//

LOCUS DMACINML\_23 2942 bp DNA linear 16-DEC-2020

DEFINITION Campylobacter species strain strain.

ACCESSION

VERSION

KEYWORDS .

SOURCE Campylobacter species

ORGANISM Campylobacter species

Unclassified.

COMMENT Annotated using prokka 1.13 from  
<https://github.com/tseemann/prokka>.

FEATURES

Location/Qualifiers

source

1..2942

/organism="Campylobacter species"

/mol\_type="genomic DNA"

/strain="strain"

gene

38..463

/locus\_tag="DMACINML\_01813"

CDS

38..463

/locus\_tag="DMACINML\_01813"

/inference="ab initio prediction:Prodigal:2.6"

/inference="similar to AA sequence:RefSeq:APA51619.1"

/codon\_start=1

```

/transl_table=11
/product="lysozyme"
/protein_id="Prokka:DMACINML_01813"
/translation="MQKIDFEIAKGLDEWLDNENVCCFNVYTKDYFNANNKDM LISDN
IKDDTNTTQAHTNENYNNTQELIPDNVIRIQTQDGSGEFIEIIFDEFKEWEKSSSGAI
KPLFTPLEGIVEDISNSLENVSIIGAWCSEKSQKCKKYY"
gene 662..793
/locus_tag="DMACINML_01814"
CDS 662..793
/locus_tag="DMACINML_01814"
/inference="ab initio prediction:Prodigal:2.6"
/inference="similar to AA sequence:RefSeq:CKG86671.1"
/codon_start=1
/transl_table=11
/product="methyltransferase small"
/protein_id="Prokka:DMACINML_01814"
/translation="MIKLLYNIKLLKVGGETIEINSNKPRGNLRRAIHIENGVKNEV"
gene 783..1520
/locus_tag="DMACINML_01815"
CDS 783..1520
/locus_tag="DMACINML_01815"
/inference="ab initio prediction:Prodigal:2.6"
/inference="similar to AA sequence:RefSeq:CKG86653.1"
/codon_start=1
/transl_table=11
/product="hypothetical protein"
/protein_id="Prokka:DMACINML_01815"
/translation="MKYKYIKWNKEEKCAIFFPDIDYSLWKKTQLKENVYNNPSLIIS
SCLITKMDILELFEYIILFICGKSMGTSRWEENLILLDTYNIDNLSNPFSLNTPKPT
YISEYINILGQLFLAGYIDFGSYCDEEDRNKIDYPSNLSYYKEDKYQAWIYFRDNFFY
QDKFIRDLDDEPETLDEDGYSLILGDVSWDTPQYWSQYNIWVATTPKGTKYFNEILAPK
FYNKYKDLEVEIDDKGNVLRWIGEINK"
gene 1530..2288
/locus_tag="DMACINML_01816"
CDS 1530..2288
/locus_tag="DMACINML_01816"
/inference="ab initio prediction:Prodigal:2.6"
/inference="similar to AA sequence:RefSeq:CKG86653.1"
/codon_start=1
/transl_table=11
/product="hypothetical protein"
/protein_id="Prokka:DMACINML_01816"
/translation="MAIGKVIHKYGSFFPDFDEIFYNLGYDGICFDEKSDIKLFLQIP
NLKKIDILEYFEDHFLGSIFEDACEFNDLDCPLFYTEDENLKNSIKPNYNSEYVSIIG
QLFLAGYIDFGITPRSEDKYTRTDYPTNLSYYKEDKYQAWIYFRDNFFYTNAFLKGY
DDILIYKGKEYTANTLPKLLKGETIHSTMHSAASWDMPRYWSGYNIWVTRTQKGTKYL
REILEPRVYNKYKDLEVEIDDKGNILRWIGEINR"

```

ORIGIN

```

1  gggttttgga actggagttt ttttaactcc ttctaaaatg caaaagattg attttgaaat
61  tgcaaaaagg ttagatgagt ggcttgataa tgaaaatgtg tgttgcttta atgtttatac
121 taaagattat tttaatgcaa ataataaaga tatgcttata agtgataata taaaagatga
181 tacaaatacc acacaagctc acaccaatga aaactataac aataactcaag aactcatccc
241 tgataatggt ataagaatac aaacacaaga tggcagtgga gagttttatcg agataatatt
301 tgatgaatgt aaagaatggg aaaaatcatc aagtggagct ataaagcctt tattttaccc

```

```

361 attagaaggt atagtggaag atatttcaaa ttcacttgaa aatgtcagca ttatcgggtgc
421 ttgggtgcagt gaaaaatccc aaaaatgcaa aaaatattat taagaaaaaa tcattgacaa
481 aggatgaagt gttgcagata gtggataaac tgccaaaaaa tgtccgagat aaacgcagaa
541 gaatagttga aaacaaagaa gaattggaca aatgatggaa aaaagttaac taaaaattct
601 aaagagttag aaaataaagt agataaaaaa tacggacaat caacttacat gagaaaatta
661 gatgatcaaa ctattataca atataaaaaa gcttctaaaa gttggaggcg agaccataga
721 gataaattct aacaaacca gaggaatct tagagcaata catatagaaa atgggggtgaa
781 aaatgaagta taaatatac aaatggaata aagaagaaaa atgtgctata tttttcctg
841 atatagatta tagcttatgg aagaaaacac aattaaaga aaatgtctac aataatccct
901 cttaattat atcttcttgc ctgataacaa aaatggatat tttagagtta tttgagtatt
961 atattttatt tatttgcgga aaaagcatgg gcacatcaag atggggaatgt aataatftaa
1021 ttttattgga tacttataac attgacaatc ttagtaacc tttctcttta aatacaccca
1081 aacctaccta tataagtgaa tatataaaca tcttaggaca actattctta gcaggatata
1141 tagactttgg ttcttattgc gatgaagaag atagaaataa aatagactat ccctcaaact
1201 tatcttatta taaagaagat aaatatcaag cttggatata ttttagagat aatttctttt
1261 atcaagacaa atttattaga gatttggacg atcctgaaac attggacgag gatggatata
1321 gtcttatttt aggtgatgtt tcttgggata caccacaata ttggtcacia tacaatatct
1381 gggtagcaac aactcccaa ggcacaaaat attttaatga aatcttagct cctaaatttt
1441 ataataaata caaagattta gaagtagaga ttgatgataa gggtaatgtg cttaggtgga
1501 ttggagagat taataaatga aagataaaaa tggcgattgg taaagtaatt cataaatagc
1561 gttcgttctt tcctgatttt gatgagatat tttacaattt aggttatgat ggtatttgtt
1621 ttgatgaaaa atcagatata aagctttttc tacaatttc aaaccttaag aaaatagata
1681 ttttagaata ttttgaagat ctttttttag gatcaatttt tgaggatgca tgcgaattta
1741 atgacttggga ttgtcctttg ttttacacag aagatgaaaa cttaaaaaat tccataaaac
1801 caaactaca tagtgagtat gtaagtatta tagggcaact attcttagca ggatatatag
1861 actttgggat tactccaaga tcggaagata aatatacaag aacagactat cctactaatt
1921 tatcttatta taaagaagat aaatatcaag cttggatata ttttagagat aatttctttt
1981 atactaatgc atttttaaaa ggatattatg acgatatttt aatctataaa ggcaaagaat
2041 atacagcaa tactctaccc aaacttaaaa aaggagaaac gatccatagt acaatgcata
2101 gtgctgcttc ttgggatatg ccaagatatt ggagtgggta taatatatgg gtaacaagaa
2161 ctcaaaaagg taaaaaatat ctccgtgaga ttttagaacc tagagttttat aacaaatata
2221 aagattttaga agtagaaatt gatgataagg gtaatatact tagatggatt ggagagatta
2281 atagatgaat ctaaaaattt tagaatcaaa aacaaaaatt tacaatttga gagatttaag
2341 atgaaatata aagtattaaa taaagagcat atgaaatttt atttttacga tatcccttat
2401 gagttaggta aaaaaataag taaatactat gaaatgcacc tttttctaca aattccaac
2461 cttaaaaaaa cagatatttt agaattgttt gaaatgacaa ttttgacaag ttttgataac
2521 gaagcagaaa tggatgaaac aatttttgct gattattttat ttgatttttc aaatttatat
2581 aaattagcaa atcattatgc ggatgattat gtagctattg taggacaact ttttttagat
2641 gattgtattg atttttggcg ttgcgcatac cataaaatgg acaatgtaaa taaaaaaact
2701 cctaatttat cacaatacaa aaaagaaaaat aaatatgaaa cttggaaata ttttagagat
2761 aattatattt attcttataa tgataattta gtaaatcatg caacaaaagg cgatttttgg
2821 gggaatttgg ataattggga tatgtataat atcaattgct ttcgcactca aaaaggcaca
2881 aaatatctca atgaaatctt agctcctaaa ttttataaca aatacaaaga tttagaagta
2941 ga

```

//

```

LOCUS      DMACINML_24          2571 bp    DNA        linear      16-DEC-2020
DEFINITION Campylobacter species strain strain.
ACCESSION
VERSION
KEYWORDS   .
SOURCE     Campylobacter species
  ORGANISM Campylobacter species
            Unclassified.
COMMENT    Annotated using prokka 1.13 from

```

[https://github.com/tseemann/prokka.](https://github.com/tseemann/prokka)

```
FEATURES             Location/Qualifiers
    source            1..2571
                     /organism="Campylobacter species"
                     /mol_type="genomic DNA"
                     /strain="strain"
    gene              250..741
                     /locus_tag="DMACINML_01817"
    CDS                250..741
                     /locus_tag="DMACINML_01817"
                     /inference="ab initio prediction:Prodigal:2.6"
                     /inference="similar to AA sequence:RefSeq:CKG86435.1"
                     /codon_start=1
                     /transl_table=11
                     /product="hypothetical protein"
                     /protein_id="Prokka:DMACINML_01817"
                     /translation="MQIPIYSKLGKLESGIDNITSGQIAWFVCSVIFTYLLFLLIV
IINRTISFENLKFFTFEGFFKSLAFIFANHFLLFIFMWIVCIINFFNIKNLIPITLN
WIISYCYFVLEINIYFILILCITICVVFYFLQKRLLYTFLFYFVYVMVLTITLTYLGGG
FYK"
    gene              738..950
                     /locus_tag="DMACINML_01818"
    CDS                738..950
                     /locus_tag="DMACINML_01818"
                     /inference="ab initio prediction:Prodigal:2.6"
                     /inference="similar to AA sequence:RefSeq:CKG86410.1"
                     /codon_start=1
                     /transl_table=11
                     /product="hypothetical protein"
                     /protein_id="Prokka:DMACINML_01818"
                     /translation="MKYYVTIYIDPLVECFDLCENKNFINAEDFTHAFLGLTKDKSPD
ELDKIDEQLRQEYLKNKEFKLIKSIK"
    gene              992..1450
                     /locus_tag="DMACINML_01819"
    CDS                992..1450
                     /locus_tag="DMACINML_01819"
                     /inference="ab initio prediction:Prodigal:2.6"
                     /inference="similar to AA sequence:RefSeq:CKG86435.1"
                     /codon_start=1
                     /transl_table=11
                     /product="hypothetical protein"
                     /protein_id="Prokka:DMACINML_01819"
                     /translation="MQIPIYSKLGKLESGIDNISSGQIAWFVCSVVLALVTFLIY
FTVIEDKNLFLAIFELFQWQLFIFIIYFCIPFNLLYIHNAIPLVLSAIFMFLTYFS
SLNLFIIGCCGIGAFFLISIFKRKLMFSVLLFAMGYICIIYFFLYAITRYH"
    gene              1459..1629
                     /locus_tag="DMACINML_01820"
    CDS                1459..1629
                     /locus_tag="DMACINML_01820"
                     /inference="ab initio prediction:Prodigal:2.6"
                     /inference="similar to AA sequence:RefSeq:CKG86410.1"
                     /codon_start=1
                     /transl_table=11
                     /product="hypothetical protein"
```

```

/protein_id="Prokka:DMACINML_01820"
/translation="MKYYVTIYIDELLEFMKIKDLLNMKGLDFTHAFLGLTKGKSPDE
LDKIDEELKQKF"
gene 1676..2155
/locus_tag="DMACINML_01821"
CDS 1676..2155
/locus_tag="DMACINML_01821"
/inference="ab initio prediction:Prodigal:2.6"
/inference="similar to AA sequence:RefSeq:CKG86435.1"
/codon_start=1
/transl_table=11
/product="hypothetical protein"
/protein_id="Prokka:DMACINML_01821"
/translation="MQIPIYSKLEKLESGIDNISSQIAWCLGSGYIALICAVFVV
VYKLNLEFELYIVFFFPILLFYIAIFWFIFLSFYKNFFFIHLFCYSFMYIFNIIIFND
FYLNLVVMNILLITIWLFVFKLHLKFRFLFLMMYFCFEFAIFIGIIPYGLLEGTISK"
gene 2152..2382
/locus_tag="DMACINML_01822"
CDS 2152..2382
/locus_tag="DMACINML_01822"
/inference="ab initio prediction:Prodigal:2.6"
/inference="similar to AA sequence:RefSeq:CKG86410.1"
/codon_start=1
/transl_table=11
/product="hypothetical protein"
/protein_id="Prokka:DMACINML_01822"
/translation="MKEIKYVVTIYIDELLENEMLKHVDFSLFKAKFSQISKQIDF
THAFLGLTKGKSLDELKIDKELRQEYLKKE"

```

ORIGIN

```

1 atattatgta acaatttata ttgatccatt ggtagaatgt tttttggatt ttaaaaatca
61 gtgttattgg caaagagaag atttcaccca tgccttttta ggacttgcca aaggcaaaag
121 tcctgatgag ttagataaaa tagatgaaga attaaaacaa gaatatctta aaaacaaaga
181 atttaaatta attaaaagta ttaagtagat tggttataat aaaacaattt atctatatta
241 ggagcaaatt tgcaaattcc tttttattct aaactcaaag caaaactaga aagtaaagga
301 atagacaata taacaagcgg acaaattgct tggtttgtgt gtagcgtaat ttttacctat
361 ttattatfff tattaattgt aattataaat actagaacaa tatcttttga aaaccttaaa
421 ttttttactt ttgaagggtt tttcaaactc cttgctttta tttttgcaa tcattttttt
481 ttatttattt ttatgtggat tgtttgtata ataaatffff ttaatataaa aaatftaatt
541 ccaataacac taaattggat aataagctat tgttatffff ttcttgaaat taatatttat
601 tttatfffft ttttatgtat aaccatttgt gttgtatfff atfffftaca aaaaagatta
661 ttatatactt ttttattfta ttttgtttat atggtattaa cttatacttt gttttatctt
721 ggtggaggat tttataaatg aatattatg taacaattta tattgatccg ctggtagaat
781 gctttttaga ttgcaaaaat aaaaatftta ttaatgcgga agatttcacc cacgcctttt
841 taggacttac taaagataaa agtcccgatg agttagataa aatagatgaa caattaagac
901 aagaatatct taaaaacaaa gaattftaat taattfaaag tattaagtag attggttata
961 ataaaacaat ttatctatat taggagcaaa tttgcaaatt cctattttatt ctaaactcaa
1021 agcaaagcta gaaagtaaag gaatagacaa tatatcaagt gggcaaattg cttggtttgt
1081 gtgtagtgta gttcttgctt tgggtgactt tcttattatc ttttttacag tgattattga
1141 agataaaaat ttatfffftag caatatttga attgtttcaa tggcaactat ttatffffat
1201 catatacttt tgtatccctt ttaatctatt atatattcat aatgctattc ctttagtgct
1261 gtctgcaata tttatgffff taacattgta tttttctagc ttaaatttat ttattatcgg
1321 ctggttggtg ataggagcat ttttcttaat atccatffff aaaagaaagc ttatgfffft
1381 tgttttgggt tttgctatgg gttatatttg tatctatfff tttcttttac caataactcg
1441 ctatcattaa ggaacaaaat gaagtattat gtaacgattt atattgatga gttattagaa

```

```

1501 tttcaaatga taaaagatth gctgaatatg aaaggthtag acttcacca cgcctthtta
1561 ggacttacca aaggcaaaag tcctgatgag ttagataaaa tagatgaaga attaaaaaca
1621 aaatthtaag caaatthgth tataataaaa caatthtatct atatthaggag caaatthtga
1681 aatthctatt tathctaaac tcaaagcaaa actagaaagc aaaggaatag acaatatatc
1741 aagthgggcaa atthgctthgth gththaggthgag thggctatath gcctthaatat gthgctgthgth
1801 thgthgthgta tataaaactta agaaththgga atththgagctth tataththgthth ththctthtcc
1861 tatctthgcta thththaththg ctathathththg gththathththc ththagthththth ataaaaactth
1921 ctthththththth catctthththth gctaththctthth ththgthththct ththththththth ththththththth
1981 ththththththth aatctththgthg thththgaththth ththththththth acaathththgthc thctththththgth
2041 thaaaththctat ththaaaththth gathththththth ththththththth ththththththth ththgathththgthc
2101 gataththththth ggaaththctatc ctthththgthgct thththgaththgthgth actathththththca aaththgaththgathth
2161 aththththththth atthththgththca aaththththththth gaththgaththththth ththgathththththth aaththgthththththth
2221 catgththgathth ththctththththct atthththththththca aathththththctc aaththththctthth gcaaththctgthc
2281 thththctththctg ctthththththththg gctththctththththth gthcaaththththctc ththgaththgaththth agaththththththth
2341 gaththththththth ththgaththcaaga aththctththththth acaaththththththth gaththththththththth agaththththththththth
2401 thggthththththth ctththththththththth thththththththctc aaththgaththgthgthth ththththththththth ththgaththctgthgth
2461 gthththththththth ctctththctththth aaththgcaaththththththththth gaththgathththththth aaththththththththth agththththththththth
2521 gaththgthgctththg athththththththththth thththththththththctc ththththththththth ataththththththththth th

```

//

LOCUS DMACINML\_25 2204 bp DNA linear 16-DEC-2020

DEFINITION Campylobacter species strain strain.

ACCESSION

VERSION

KEYWORDS .

SOURCE Campylobacter species

ORGANISM Campylobacter species

Unclassified.

COMMENT Annotated using prokka 1.13 from  
<https://github.com/tseemann/prokka>.

FEATURES

source

Location/Qualifiers

1..2204

/organism="Campylobacter species"

/mol\_type="genomic DNA"

/strain="strain"

gene

complement(2..78)

/locus\_tag="DMACINML\_01823"

tRNA

complement(2..78)

/locus\_tag="DMACINML\_01823"

/product="tRNA-Ile"

/inference="COORDINATES: profile:Aragorn:1.2"

/note="tRNA-Ile(gat)"

gene

complement(86..161)

/locus\_tag="DMACINML\_01824"

tRNA

complement(86..161)

/locus\_tag="DMACINML\_01824"

/product="tRNA-Ala"

/inference="COORDINATES: profile:Aragorn:1.2"

/note="tRNA-Ala(tgc)"

gene

complement(263..1772)

/locus\_tag="DMACINML\_01825"

rRNA

complement(263..1772)

/locus\_tag="DMACINML\_01825"

/product="16S ribosomal RNA"

ORIGIN

```

1 atggtgggcc taacaagact tgaacttgtg acctcaccct tatcaggggt gcactctaac
61 cagctgagct ataggccctt aataatgggt gagaatagcg ggatcgaacc gctgacctcc
121 tgcgtgcaaa gcaggcgctc tcccagctga gctaattccc cataaacaat tagctttatc
181 atcaatcttt gaaatctaaa caagaatcaa ttgagtttat aatgaagtaa tagttgtgag
241 acttattact ttgtactcta gaaaggaggt gatccaaccg caggttctcc tacggttacc
301 ttgttacgac ttcaccccag tcgctgattc cactgtggac ggtaactagt ttagtattcc
361 ggcttcgagt gaaatcaact cccatgggtg gacgggagggt gagtacaaga cccgggaacg
421 tattcaccgt agcatggctg atctacgatt actagcgatt cgggcttcac gctctcgagt
481 tgcagagaac aatccgaact gggacatatt ttatagattt gctccacctc gcggtattgc
541 gtctcattgt atatgccatt gtagcacgtg tgtcgccctg ggcataaggg ccatgatgac
601 ttgacgtcgt ccacacctc ctcctcctta cgaaggcagt ctatttagag tgctcggccg
661 aaccgttagc aactaaatac gtgggttgcg ctcgttgagg gacttaacc aacatctcac
721 gacacgagct gacgacagcc gtgcagcacc tgtctctaag ttctagcaag ctagcacctc
781 catatctcta taaggttcctt aggatatcaa gccaggtaa ggttcttcgc gtatcttcga
841 attaaaccac atgctccacc gcttgtgagg gtccccgtct attcctttga gttttaatct
901 tgcgaccgta ctccccaggc ggtacactta atgcttagc tgcattactg agatgactag
961 caccccaaca actagtgtac atcgtttagg gcgtggacta ccagggtatc taatcctggt
1021 tgctccccac gctttcgcgc cttagcgtca gttgagttcc agcagatcgc cttcgcaatg
1081 ggtattcttg gtgatatcta cggattttac ccctacacca ccaattccat ctgcctctcc
1141 ctactctag actatcagtt tcccaagcag tttaatgggt aagccattag atttcacaag
1201 agacttgata atccgcctac gcgcccttta cgcccagtgat ttccgagtaa cgcttgacc
1261 ctccgtatta ccgcggtgc tggcacggag ttagccgggt cttattcctt aggtaccgtc
1321 agaattcttc cctaagaaaa ggagtttacg ctccgaaaag tgtcatctc cagcggcggt
1381 tgctgcgtca gggtttcccc cattgcgcaa tattccctac tgctgcctc cgtaggagtc
1441 tggaccgtgt ctcagttcca gtgtgactga tcatcctctc agaccagtta agcgtcatag
1501 cttgggtgag ccattacctc accaactagc tgatactata tagtctcatc ctacaccgaa
1561 aaactttccc tactcaactt gtgttaagta ggagtataga gtattagcag tcgtttccaa
1621 ctggtgtcct cttgtgtagg gcagattaac tataccttac tcaccctgac gccactaatc
1681 cacttctagc aagctagaag cttcatcggt cgacttgcat gtattaggca cgccgccagc
1741 gttcactctg agccaggatc aaactctcca taaaaattat agatagttta atcttttct
1801 tcaaagaaaa agtaatgaag attaaaaata aaaactttta atctttaaat atttagattg
1861 aatagatttt acataattgc ttatgcctaa atcttttctg gctcaatcga tcacttattt
1921 agatttcaaa gattgactaa taagatttga aataacaata ttaattttaa agaacaaaaa
1981 caaaaaatca tttattgttt ataaataaag tttagtaata ataaagtttt ataaacttga
2041 attgatttga ctaggattaa aattaattta aaactagaaa caagggttta caaatcttc
2101 atttagcttt ataaacttta gtttataatt taaagatttt aaagtccttt tttgaaaaag
2161 gaaatgaaag tataactaat taagcttaaa ggaggattaa ataa

```

//

```

LOCUS          DMACINML_26                2132 bp    DNA        linear        16-DEC-2020
DEFINITION     Campylobacter species strain strain.
ACCESSION
VERSION
KEYWORDS       .
SOURCE         Campylobacter species
  ORGANISM     Campylobacter species
               Unclassified.
COMMENT        Annotated using prokka 1.13 from
               https://github.com/tseemann/prokka.
FEATURES       Location/Qualifiers
  source        1..2132
               /organism="Campylobacter species"
               /mol_type="genomic DNA"
               /strain="strain"
  gene          59..520

```



CDS /locus\_tag="DMACINML\_01826"  
 59..520  
 /locus\_tag="DMACINML\_01826"  
 /inference="ab initio prediction:Prodigal:2.6"  
 /codon\_start=1  
 /transl\_table=11  
 /product="hypothetical protein"  
 /protein\_id="Prokka:DMACINML\_01826"  
 /translation="MEYSQEKASLVSLHYHGRFNINIKDNIRDSIIKNSRFLWFLIRY  
 KTNPKNFIPFLIRACDEADIYLSNPINIKISLIFDVFSYLNKREIIKYRIHKINTNR  
 TSSKQVHKQDTLYNLALWYENDLDFIPYQDYIIDLKKFKNLNQFHNLPKSP"  
 gene 854..1195  
 CDS /locus\_tag="DMACINML\_01827"  
 854..1195  
 /locus\_tag="DMACINML\_01827"  
 /inference="ab initio prediction:Prodigal:2.6"  
 /inference="similar to AA sequence:RefSeq:APA47441.1"  
 /codon\_start=1  
 /transl\_table=11  
 /product="DNA-directed RNA polymerase subunit beta"  
 /protein\_id="Prokka:DMACINML\_01827"  
 /translation="MYLKYPDTEEQQAQAINPQAFSCSTQEELILKKEDEIYFKAVKNN  
 ISYFINKNDGILKVALTGNEENAIELYSFAKENQFKILQDKASKMLKIYKLERYSK  
 EILSHRGEILN"  
 gene 1438..1974  
 CDS /locus\_tag="DMACINML\_01828"  
 1438..1974  
 /locus\_tag="DMACINML\_01828"  
 /inference="ab initio prediction:Prodigal:2.6"  
 /inference="similar to AA sequence:RefSeq:APA47441.1"  
 /codon\_start=1  
 /transl\_table=11  
 /product="DNA-directed RNA polymerase subunit beta"  
 /protein\_id="Prokka:DMACINML\_01828"  
 /translation="MHKIGNVAIVSLSSADKKGGSYFTTNKVSMDGFENLYLDTEAN  
 GYEKQIKNSRKNLYITNLKAYKEKEQNITDKIPYNKIFVFRAYLNNEEKFFFDEAIK  
 WAYCIKKEVELEGNQPKINILENLQGNDAFNTSMLLASDREKLNLANEKYQLILFAY  
 FNAPAFKTTQGITHLVLK"

ORIGIN

```

1  ggaaagaacc tttgattcat ataaaaagta tatatcaca tatattggcg ataacttggt
61  ggaatatagt caagaaaag cttccttggt ttctttacat tatcatggca gatttaataa
121 tatcaaagat aatattcgag attctattat caaaaattcg agattcctat tgtggttttt
181 aatacgatac aaaactaacc caaaaaactt tattccattt cttattaggg cttgcatga
241 agccgatatt tatctatcta atccaaatat taataaaata agtcttattt ttgatgtggt
301 ttcttactta aatatcaaaa gggaaataat taaatataga atacataaaa tcaatacaaa
361 tagaacaagc tccaaacaag ttcataaaca agatacacta tataatttag cactttggta
421 tgaaacgat ttagatttta taccttatca agattatatt atcgatttaa aaaaattcaa
481 aacttaaac caatttcaca acttaccaaa aagccataa atgatattgt tgcaaccctt
541 aagcctcatt tagattacct aacaccctc actcaaaaaa attttagctt agataatatt
601 tattgtattg ctaattattg tgagaattta ggtactaata aattggataa tgttgcttg
661 ctaataaga cttaagaca aaagtttgaa aaactagaaa caatacacc ccataatatt
721 cttatactct atccaaacc tactccatct attatacaaa tagaacaacc taaaatact
781 tttattattt tactttatag gagcaaaagc aaaaatagat tgcactaat tgatagaaga
841 tcaatgtgag ctaatgtatt taaaatatga tccaacacaa gaagaacaac aagcaattaa
  
```

```

901 tccacaagct ttttcttgta gcacccaaga agaacttatt ttaaaaaaag aagatgaaat
961 atacttttaa gcagtaaaaa acaatatatc atattttatt aataaaaaacg atggaatfff
1021 aaaagttgct cttactggca atgaagaaaa tgctatagaa ttatacagtt ttgctaaaga
1081 aatcaatfff aaaatfffgc aagataaagc ctcaaagatg ctaaaaatct atttaaaact
1141 agaaaggtat agtagcaaag agatfffatc gcatagaggg gaaatfffga attaacactt
1201 aataatcfta agatfffaga tgaaaatgga aataatcatg aaaccatcac taaaatattt
1261 cttcataatt gtgagaacag aaggatfffat gaaagfffaa agtttagagta tcaagaaggc
1321 atttataaga gcagfffcaa gattgattta atffftagatg aaaactcftc tffffffataa
1381 agggctacia aatgtattat agctacaaaa gtcttaggag atffftagcac aagtcaaatg
1441 cataaaattg gaaatgtagc gatagtctct ttaagfffctg cagataagaa aggtggaagc
1501 tatacftfta caaataaagt aagtatgcaa gatfffggag aaaatcftta tftagatact
1561 gaggcaaatg gatatgaaaa acaataaaaa aattcaagaa agaatftata tatcacaaat
1621 ttgaaagcft ataaagaaaa ggaacagcaa aatattaccg ataaaaatccc ttacaataaa
1681 actatfffctg ttagagcfta cftaaataat gaggagaaat tfffcttcga tgaggcaatt
1741 aatgggcat attgtataaa aaaagaagtg gaattggaag gcaatcaacc taaaattaat
1801 atffftagaaa atcftcaagg aatgatata gcctftaata cftctatgct tftagcaagt
1861 gatagggaaa agcftaatct tgcaaatgaa aatatcaat taatfffatt tgcctatfff
1921 aacgcacctg catttaaac aacacaagga ataacgcatt tagtgftaaa atgactaaag
1981 atttaaacta tgcgaaaaaa gccattgaac ttaccctctc aatataaaaa gataaagaac
2041 aaatftatfff aaaagcccaa aaggattatg atgaattagt ccagcataat ttcactcaaa
2101 gaatfffata tgataaagat tctagggtag at

```

//

LOCUS DMACINML\_27 2132 bp DNA linear 16-DEC-2020

DEFINITION *Campylobacter* species strain strain.

ACCESSION

VERSION

KEYWORDS .

SOURCE *Campylobacter* species

ORGANISM *Campylobacter* species

Unclassified.

COMMENT Annotated using prokka 1.13 from  
<https://github.com/tseemann/prokka>.

FEATURES Location/Qualifiers

source 1..2132

/organism="Campylobacter species"

/mol\_type="genomic DNA"

/strain="strain"

gene 122..1123

/locus\_tag="DMACINML\_01829"

CDS 122..1123

/locus\_tag="DMACINML\_01829"

/inference="ab initio prediction:Prodigal:2.6"

/inference="similar to AA sequence:RefSeq:APA51640.1"

/codon\_start=1

/transl\_table=11

/product="mobilization protein"

/protein\_id="Prokka:DMACINML\_01829"

/translation="MNDLKNLSKHFQEKYGFQCYQIAIHRDEGHFNEQGEKLIHHAH

MEFITLDKETGKNFRREKISPKVLRRIQTEIAEILGMERGEDKRISGAKRIEPRAYA

ALKEKEKREKRNINLEQEKEQFLNKSEYKKIENFRKSQINQGLDKDFKELSEL

KKNFQEIKEDNLSELLNDILREHLERIEKLLKENSILKAENELLKQKEQKNDKSIDQE

QKNASERNFEPKNDNNTEDKKIFFEKLATYRLNEGLSKIYSKPLKRIVEPETEAKKKE

RIKILTETMEKTEAYLPETLKKWLENNKDIDLKEILVAYQNTLSKELKQSKSIYKGR"

ORIGIN

```

1 aaataagata gtttcggaag cgaaagaagc ctatgaaaaa aataaaagcc ccaaagctcc
61 aaaatntaaa gctaagagct atgaatggag cttagttgtc aatatcaagc ctgatacctc
121 aatgaatgat ttaaaaaacc tttctaaca ttttcaagaa aaatacggct ttcagtgcta
181 tcaaactgct atacaccgcg atgaagggca ttttaacgag caaggcgaaa agcttataaa
241 ccaccacgca catatggaat ttatcactct tgacaaagaa acaggtaaaa acaactttag
301 gcgtgaaaaa ataagcccaa aagtcttaag agaaattcaa accgaaatcg ctgaaatcct
361 aggaatggag cgtggcgaag ataagagaat aagcggagca aaacgcatag agcctagagc
421 ttatgcagcc ttaaaagaaa aggaaaaaag ggagaaaaag cgaaacatta atttagagca
481 agagcaagaa aaagagcaat ttttaaataa aagcagatga aaaaaaatca ttgaaaatnt
541 tagaaaaagt caaatatc aagggcttga caaagattc ttcaaagagt taagcgaact
601 aaaaaagaac tttcaagaga ttaaagaaga caatntatca gagctntntaa acgatatntt
661 aagagagcat ttagaacgca ttgaaaagtt aaaaaagag aatagcattt taaaagccga
721 aatgagcctt ttaaagcaaa aagagcaaaa aaacgataaa agtatcgacc aagagcaaaa
781 aaacgcttca gaacgcaatt tcgagccgaa aaacgataat aatacagaag ataaaaaaat
841 atntttcgaa aaattagcca cttacagact gaatgaagga ttaagtaaga tnttattcaa
901 gccccntaaa agaattgtgg agcctgaaac cgaagccaaa aagaaagaaa gaatntaaaat
961 tnttaacagaa acaatggaaa aaacagaagc ttacctacct gaaactntaa aaaaatggct
1021 tgaaaaataa aaagatattg atntaaaaga aatacttgtc gcttatcaaa atacccttag
1081 caaagaatta aaacagagca agagtatnta caaaggcaga taaacactnt ctctccctnt
1141 ttagccttagc aaatcgacc tntggtgcta tgatntgca taatcgggggt gcggggggcgt
1201 gaagttagcc tagagctaac gaacggacaa gccaccgcc taatgtatat catcaaaact
1261 tnttttgntt tctctctcgc gcgcgtacgc gtacgcgatt tnttttatnt tnttatatnt
1321 tnttatatnt ttagggggct tnttaagccc tatataatgg gggctagcga aatattaagg
1381 gtagaaatct aaactattaa gggtagaaat ctaaactatnt aagggtagaa atctaaacta
1441 ttaagggtag aaatctaaac tattaagggg acaaaatnt actattaagg gtagaaatat
1501 attgacaacc tatccttaat atgctacaat aaaaaatccg ccttgagntt tcaactntgg
1561 cggaaatnta tcaatcaagg ctaactatga aacgacatag taagcgtntt gtgagattat
1621 acctaaatnt taggntntnt aagctntaaag ttgaagtatnt tntctaacaa aaccgcaggg
1681 gtagagaagc cccttgccnt gattgtccta cnttgatag gcaaatgagc gatatagnta
1741 aataccataa tgatntntaa aaaatntcagt tgcctagntt tacagaaatc gaacaagatt
1801 tattgtgtgg tntaatggta aaactntaaag aagaaaaagg caaagtaaca tnttatcctt
1861 gggactntag aaacatntct aaaagtagnt atgataataa tagtctaatg gaatntgcgt
1921 cntctctaaa aaggaaatnt ttcaaagctg actnttacaat aatntgaaaaa acaactaggg
1981 gtgaaaaaga agttgaagca cacaaaacaa taaacctntt tacagaatnt gcaatnttatg
2041 tnttatgcaag ctcaaaagat ttagagagta tagaaataga agntaatccg caatntgaaat
2101 atatntntaaa tcaactaacc gctaatntnta ca

```

//

```

LOCUS      DMACINML_28                2116 bp    DNA        linear      16-DEC-2020
DEFINITION Campylobacter species strain strain.
ACCESSION
VERSION
KEYWORDS   .
SOURCE     Campylobacter species
  ORGANISM Campylobacter species
            Unclassified.
COMMENT    Annotated using prokka 1.13 from
            https://github.com/tseemann/prokka.
FEATURES   Location/Qualifiers
  source    1..2116
            /organism="Campylobacter species"
            /mol_type="genomic DNA"
            /strain="strain"
  gene      50..126
            /locus_tag="DMACINML_01830"

```

tRNA 50..126  
 /locus\_tag="DMACINML\_01830"  
 /product="tRNA-Ile"  
 /inference="COORDINATES: profile:Aragorn:1.2"  
 /note="tRNA-Ile(gat)"

gene 440..1039  
 /gene="rhtC"  
 /locus\_tag="DMACINML\_01831"

CDS 440..1039  
 /gene="rhtC"  
 /locus\_tag="DMACINML\_01831"  
 /inference="ab initio prediction:Prodigal:2.6"  
 /inference="similar to AA sequence:RefSeq:ABS43249.1"  
 /codon\_start=1  
 /transl\_table=11  
 /product="threonine efflux protein"  
 /protein\_id="Prokka:DMACINML\_01831"  
 /translation="MTFLFIFGIHLSALLTPGPDFLVSAYALKFSFKEALKAAFGVS  
 LAILLWIIIFSLTGLKILFDTFPIQLVLSTLGAMYLFYLAYLLLKNISNEIHFTNSVK  
 ISQPFLGGFLTNTNAKAIIFYFGSIFSSLNFTGDNFEIFLLVIIILGLES LIYFIFIAF  
 LFSNLKIKMLYLNHHKKIDLFCAFIFISFACFTLATIYF"

gene 1048..1308  
 /locus\_tag="DMACINML\_01832"

CDS 1048..1308  
 /locus\_tag="DMACINML\_01832"  
 /inference="ab initio prediction:Prodigal:2.6"  
 /inference="similar to AA sequence:RefSeq:SQE23465.1"  
 /codon\_start=1  
 /transl\_table=11  
 /product="hypothetical protein"  
 /protein\_id="Prokka:DMACINML\_01832"  
 /translation="MLIQIKEINQQNITDILYGKPCFYSLGCFIFDEKIINYWKQNILK  
 EKLGHYHNAPLIAKIGMAYYETINNEKLKKNILKMRNIGMIY"

gene 1434..1829  
 /locus\_tag="DMACINML\_01833"

CDS 1434..1829  
 /locus\_tag="DMACINML\_01833"  
 /inference="ab initio prediction:Prodigal:2.6"  
 /inference="similar to AA sequence:RefSeq:SQE23465.1"  
 /codon\_start=1  
 /transl\_table=11  
 /product="hypothetical protein"  
 /protein\_id="Prokka:DMACINML\_01833"  
 /translation="MLTENSSIEPHQDIFKRDDEITWNDNGQIKEQIAFNFFLDNAED  
 GGEMELWNWKPNDDEYRKFQHTNIKLNLYGLDRSKISLPYTTYKPKLGEIVLFNPRYVH  
 AVKKANKGIRLTISCFLSVNKNEELVVWS"

ORIGIN

```

1 gcacgcagga ggtcagcggt tcgatccgc tattctccac cattattaag ggcctatagc
61 tcagctggtt agagtgcacc cctgataagg gtgaggtcac aagttcaagt cttgtaggc
121 ccaccattag aatcagattt ggaatgatat taatttattt atatttctac ttgccttaat
181 taccctatat aaatcagtat tttattttta ttagtaaggt tttattaata ttttgaatta
241 atattgattg tgttatatta aatcatataa aatgttttta ataaggtgct aataaatgaa
301 tttttaatta aataaagatt attaacattt tgtagcattt tgcaatatta ttttctatat
361 ttgattgttt atatttttgt tttttataat tttttgagaa atttgcgata aaatcacaaa
  
```

```

421 aactacaaat ggaattctga tgactttttt atttatTTTT ggtattcatt tatctgcact
481 cttgacacca ggacctgatt tttttctcgt tagtgcttat gctttaaaat ttagttttaa
541 agaagcctta aaagcagcat ttgggtgtaag tttggcaata ttgctttgga ttatTTTTtc
601 ttttaactgga cttaaaattc tttttgatac ttttcctttt atccaacttg tattatctac
661 tttaggagcc atgtatctgt tttatcttgc ttatTTtgctt ttgaaaaata tttccaatga
721 aatacacttt acaaatagtg taaaaatttc acaaccgttt ttaggcgggtt ttttgacaaa
781 tattacaaat gctaaagcta ttttttattt tggaagtatt ttttctagct taaattttac
841 aggagataat tttgaaatct ttttactagt tattatcctc ggTTTTagaat ctttaattta
901 ttttattttt attgcttttt ttttttcaa tttaaaaatt aaaatgttat atctaaatca
961 tcataaaaaag attgatttgt tttgcgcttt tttttttata agTTTTgctt gttttacact
1021 tgcaacaatt tttttttagg agcataaatg ttgatacaaa taaaagaaat taatcagcaa
1081 aatattactg atattttata tggaaaacct tgTTTTtatt ctttaggttg tatatttgat
1141 gaaaaaatta ttaactattg gaaacaaaat atacctaaag aaaaattggg gcattatcat
1201 aatgcaccac tcattgcaaa gataggtagt gcttattatg aaactattaa taatgaaaag
1261 ttaaaaaaga atattttgaa aatgcgaaat attggaatga tatattaaga aatgcttggt
1321 ttccttataat ttcaccaatt gattatatta tttctttatt tgatattatt tggaaataag
1381 gttgcaagag agcggTTTT aataatcgaa aaacatttgc agggctagta agagtgttaa
1441 ctgaaaattc atcaattgag ccacatcaag atatttttaa aagagatgat gaaatcactt
1501 ggaatgacaa tggTcaaatt aaggagcaaa tagcatttaa tttcttctta gataatgctg
1561 aagatggtgg agaaatggaa ctatggaatt ggaagccaaa cgatgatgaa tatagaaaat
1621 ttcagcatac taatattaaa ttgaattacg gattagatag aagtaaaatt tctttacctt
1681 atactacata caaacctaaa ctcggcgaaa tagtattggt taatcctaga tatgttcatg
1741 ctgtaaaaaa agcaaaaaa ggtataaggc ttaccatatt ttgttttctt agtgtaataa
1801 aaaatgagga gcttgtagtt tggagttgag aaatcgccaa aatattttaca aggaaaagtt
1861 taataagttg cacaattcaa gtttgcTcaa tttttgttt taatttaata tatttaataa
1921 aatttttaaga ttaattttgt ataatttcga ctttaacttc ttagaaaatt aaaagtcggt
1981 aaaaatattt tttaaaccta aatgttcttt ataattatca ttgttaagag tcacaagcaa
2041 gttttaataa aaacaatttt acaggacttg ttaaaggata aaaccaatt atcttttctt
2101 tggTTTTact tatatc

```

//

```

LOCUS      DMACINML_29          1946 bp    DNA        linear      16-DEC-2020
DEFINITION Campylobacter species strain strain.
ACCESSION
VERSION
KEYWORDS   .
SOURCE     Campylobacter species
  ORGANISM Campylobacter species
            Unclassified.
COMMENT    Annotated using prokka 1.13 from
            https://github.com/tseemann/prokka.
FEATURES   Location/Qualifiers
  source   1..1946
            /organism="Campylobacter species"
            /mol_type="genomic DNA"
            /strain="strain"
  gene     complement(120..437)
            /locus_tag="DMACINML_01834"
  CDS     complement(120..437)
            /locus_tag="DMACINML_01834"
            /inference="ab initio prediction:Prodigal:2.6"
            /codon_start=1
            /transl_table=11
            /product="hypothetical protein"
            /protein_id="Prokka:DMACINML_01834"

```

```

/translacion="MKNSKGENIVKPKNTNTAYACAIQARFEQNKIVKIEPKYCISLI
NTCFDSKEITLDNDISRVGLNDALSKRTIDFVNRFKLLKHQPNTTNCMLKKQRKLRGV
NKC"
gene      complement(659..1261)
          /locus_tag="DMACINML_01835"
CDS       complement(659..1261)
          /locus_tag="DMACINML_01835"
          /inference="ab initio prediction:Prodigal:2.6"
          /codon_start=1
          /transl_table=11
          /product="hypothetical protein"
          /protein_id="Prokka:DMACINML_01835"
          /translation="MLEFFVLLIFILIFFFVFIFSIILYFIFKIFYKLNKTKTIN
FKTIFKKFTLFLPVYLLLFLVGGCSYKYMDPQYYEFRSLCKDIDNKVIIYNKAYWEI
FSNREKGNMTHDEKGEFFFNQKINKKIYFDFKSESINVLQKNKFTLTEVTFEDCYDG
IHSTHLSYIYNDYGIFLGGDEGAGFYFRYHKRLYCEDVR"
gene      complement(1265..1711)
          /locus_tag="DMACINML_01836"
CDS       complement(1265..1711)
          /locus_tag="DMACINML_01836"
          /inference="ab initio prediction:Prodigal:2.6"
          /codon_start=1
          /transl_table=11
          /product="hypothetical protein"
          /protein_id="Prokka:DMACINML_01836"
          /translation="MSKNIKTQEAKLDLIAKFLDYANVADASYAMLHWIDYVKKENDK
KHENGDTQKLGDKHNNQNSTYARAIQARFEQNKIVKIEPKYCISLINTCFDSKEITLD
NDISRVGLNDALSKRTIDFVNRFKLLKHQPNTTNCMLKKTDKIKRS"

```

ORIGIN

```

1 agtttttggt ttatTTTTTTA ttttaaaaa gactttaaag ataaaatata aaataataga
61 aaatataaaa acaaaaaaga aaaatataag aataaatatt aaaagattaa caaagaattc
121 tagcatttat taactcctct taatTTTTCTC tgtTTTTTCA taagacaatt tgtagtgttg
181 ggctgatggt ttaaaagttt aaatctatTTT acaaaatcaa tagttctttt actcagtgca
241 tcatttaatc ctaccctact aatatcatta tccaatgtta tttctttact atcaaaaaca
301 gtatttataa gagaaataca atatttaggt tctatTTTTAA ctatTTTTATT ttgttcaaaa
361 cgagcttgta tagcacaagc ataagctgtg tttgtatTTT taggttttac aatatTTTCC
421 ctttactat ttttcataac aatatcttgc tttatTTTAT caccaaaagt ataaatatta
481 ttcttttcat cttgctctat atTTTTCCA acatattaca acatcgcata actagcatct
541 gcacaattag catagtctaa aaatttagtg attaatctca atttagcttc ttgtgtttta
601 atgtttttac tcatttgta ttctaaaaat ctaaactca aattatcttt ctaatTTTTT
661 atctaacatc ttcacaatac agtcttttat gatatctaaa atagaatcca gcaccctcat
721 cacctcccaa aaatatacca taatcattat aaatataaga taagtgtgtt gaataatgaa
781 taccatcata acaatcttca aatgtaactt ctgttaaagt aaatttattt ttttgcaaca
841 cattaatgct ttctgatttt ttaaaatcaa aatatatttt tttatttatt ttttgattaa
901 aaaagaattc tcctTTTTCA tcatgcattg tatttccttt ttctctattg ctaaataattt
961 cccaataagc tttattgtaa attattactt tattatctat atctttacac aaactcctaa
1021 actcataata ctgCGGATCC atatatTTTat aagaacatcc tcctactaag aataataaaa
1081 gatatacagg taaaagaaac aaagtaaatt ttttaaatat tgttttaaaa tttatagttt
1141 ttgttttatt ttttaattta taaaaaattt taaagataaa atataaaata atagaaaata
1201 taaaaacaaa aaagaaaaat ataagaataa atattaaaag attaacaaag aattctagca
1261 tttattaact cctcttaatt ttatctgttt ttttcataag acaatttgta gtgttgggct
1321 gatgttttaa aagtttaaat ctatttaca aatcaatagt tcttttactc agtgcacat
1381 ttaatcctac cctactaata tcattatcca atgttatttc tttactatca aaacaagtat
1441 ttataagaga aatacaatat ttaggttcta ttttaactat tttatTTTTgt tcaaaacgag

```

```
1501 cttgtatagc tcttgcataa gtagaatttt gattattgtg tttatcgcct agtttttggg
1561 tatcaccatt ttcatgtttt ttgtcatttt ctttttttac ataatcaatc caatgcaaca
1621 tcgcataact agcatcagct acattagcat agtctaagaa ttttagcaatt aagtctaatt
1681 tagcttcttg tgttttaatg tttttgctca ttttatattt ctatcttaag ctcattatgc
1741 ttttaaattt tttatccaac atctccacaa tctaataattt cctcatattc aaaatgaaac
1801 ccagcacctt catcgccttc taaaaatata ctataattat aatacaataa tcgttttaat
1861 tcttgatact taatgttatt tttatcatca atataccaag cttctatttc tttttctttt
1921 acttttccta ttccaagttt aatttc
```

//

LOCUS DMACINML\_30 1741 bp DNA linear 16-DEC-2020

DEFINITION Campylobacter species strain strain.

ACCESSION

VERSION

KEYWORDS .

SOURCE Campylobacter species

ORGANISM Campylobacter species  
Unclassified.

COMMENT Annotated using prokka 1.13 from  
<https://github.com/tseemann/prokka>.

FEATURES Location/Qualifiers  
source 1..1741  
/organism="Campylobacter species"  
/mol\_type="genomic DNA"  
/strain="strain"  
gene complement(1357..1692)  
/locus\_tag="DMACINML\_01837"  
CDS complement(1357..1692)  
/locus\_tag="DMACINML\_01837"  
/inference="ab initio prediction:Prodigal:2.6"  
/inference="similar to AA sequence:RefSeq:EAQ72691.1"  
/codon\_start=1  
/transl\_table=11  
/product="flagellin B"  
/protein\_id="Prokka:DMACINML\_01837"  
/translation="MKATALGSTDKTAGVTTLKGAMAVMDVAETAITNLDITRADLGS  
IQNQISATINNITVTQVNVKSAESTIRDVDFASESANYSKANILAQSGSYALAQANAS  
QQNVLRLLLQ"

ORIGIN

```
1 gaactgatag aagaataatc cgctaagaat cttccgccac cttcatagtt gttaaatccc
61 atagcatcag caatttgagc tgaaatttgt cccttagttt ctcttaaaga tactgaagat
121 tgagaaatta tttgacctgt tccaaaacct actgctgaaa gtccagttcc tgaaatcgtt
181 atatctctac catcgttttt aacaagagaa agacggccat aattttctgc ttgttctgct
241 aaaataccca tacttggagt aaagccactg actttaatac ctctaccctc tcttgaagta
301 agaaccaatc ttccatcatc actcaaagaa gcctcaacc cagtagtatc ttttacagca
361 ttgatagaag ctatcaaaga tccgttttta tcacctgttt caaattctat tttaccaatt
421 cttaccccat tgattgtaaa atcatccgca gtacttcctt ttgtaatggc cattgcacca
481 acagtttgca cattaaaact agctctaacg cctgttttat cagcatattt attgatctct
541 tcagccaaag ctccaagtcc tgttcctact gaagtagaaa taacaacgct ttgaaatgta
601 aagtcttcta taccattata gtttttaata gtaatttgcg cagtaccact gtctgaaatc
661 tgcgatcccg tttcaaatct tgttacaccg attttagaag actgagtcgc tccgatggta
721 gctttgatgg tttgatttga ctgtgcaccg atttggaatt cttgattgac aaagctacca
781 cttaaaagt gtttaccgtt aaatgaagt gtatttgcga tattgtcaag ttcttccatc
841 aaacgattga tatctgcttg aagcatagtt cttgttttta aactttgtcc atcttgagct
901 gcttgagtcg ctttagtctt gatagtatct aagattttaa gttgctcatc catagcctta
```

```

961 tctgcagttt gtaaaatacc tatggcatca ttaccattgt ttatagcttg acctaaagta
1021 gaagcttgtg aacgcaaaga atctgctatc gccatccctg aagcatcatc tgctgcagag
1081 ttaattctaa gacctgaact cagtctacc aaagacttat caagcgcatc agcattaaca
1141 actgaatttg catgtgcggt taacgcaccg atgttggtgt ttattctaaa acccatttta
1201 aatcctttca aaatattgca tcaaaaggac taaagcaaga agtgttccaa gttttgtttg
1261 tgatttgatt tttaaataaa aaagctcggg atttctaccg agcttggatt tgtataaatt
1321 gcagcatcct taaaaaggat gagatgggtt aagttactat tgaagcaatc ttaaaacatt
1381 ttgttgagaa gcattagctt gagctaaagc ataagatcca ctttgagcta ggatatttgc
1441 tttagagtag tttgcactct cactagcaaa gtctacatct ctgatggttg attcagctga
1501 tttaacattt acttgagtta cagtaatggt gttgatagtt gctgaaattt ggttttgtat
1561 agaaccaaga tctgctctaa tggatcaag attagtgata gcagtttcag ctacatccat
1621 cacagccata gcacctttta gagttgtaac ccctgcagtt ttatccgttg aacctagcgc
1681 agtagctttc atttgagcaa attgagattg tcctgatcca gcagaaaaac cactgccttc
1741 a

```

//

LOCUS DMACINML\_31 1671 bp DNA linear 16-DEC-2020

DEFINITION Campylobacter species strain strain.

ACCESSION

VERSION

KEYWORDS .

SOURCE Campylobacter species

ORGANISM Campylobacter species  
Unclassified.

COMMENT Annotated using prokka 1.13 from  
<https://github.com/tseemann/prokka>.

FEATURES

Location/Qualifiers

source

1..1671

/organism="Campylobacter species"

/mol\_type="genomic DNA"

/strain="strain"

gene

complement(465..1109)

/locus\_tag="DMACINML\_01838"

CDS

complement(465..1109)

/locus\_tag="DMACINML\_01838"

/inference="ab initio prediction:Prodigal:2.6"

/inference="similar to AA sequence:RefSeq:CKG87616.1"

/note="Domain of uncharacterised function (DUF1910)"

/codon\_start=1

/transl\_table=11

/product="hypothetical protein"

/protein\_id="Prokka:DMACINML\_01838"

/translation="MVRDTSKDEAYFTKEIIESEEDIKESKILLELFPGQRETCLFC

IEDRKFHFLAMDKYSRGDDIDIVKKDLEAYILEKEKNRLEKGLDISWFDGNALELCVRV

LLDMDTACVLELIEEDERKRRDILNRDWFHFIFGSKGKNLNLERKCKIRKEHELIKEFV

ATKDIEFLHQYMKKHTRLRDLDTWDLEGAIVKLMNLDKEEFKSYKYPYDLI"

gene

complement(1113..1493)

/locus\_tag="DMACINML\_01839"

CDS

complement(1113..1493)

/locus\_tag="DMACINML\_01839"

/inference="ab initio prediction:Prodigal:2.6"

/inference="similar to AA sequence:RefSeq:CKG87598.1"

/codon\_start=1

/transl\_table=11

/product="methyltransferase small"



/protein\_id="Prokka:DMACINML\_01839"  
/translation="MQMDKYKAKGYKRISLNKVKGLDDKIHHEMDGIYYNPKDKPKY  
IIAEAKFGTSKLDKTKQMSDEWLIKNLKQLKDNVGEKQAKEIKLLNSNEVRKDLF  
HVDEGGKETIDYLDKANKIKPKG"

ORIGIN

```
1 tccacctaatt tctaaacgat ttttttgtct taatagcata agtgcttcta aatctttttt
61 aactagattt atatcatcac cacgagagta tttatccata gcaatacatt tttttctatc
121 tgttatagaa aaaaaataat tttcccttct tgcatctcct agtggaagtt ctaagagtct
181 tttttcatct tctttgattt ttttttcaca ctctattata tgtttcgtaa aatcagcttc
241 atctctctta gtatctctta gcatttttta tcctttttat taagtttttg gtttttgcatt
301 ttttatctaa ttctttaata ctacattgc cttttttatc aacatgaaat aaatcttttc
361 tgacttcatt gctatttttt ttaagaagat ttgctatttt ttctctatct tttttatcta
421 caataccaag tctattttcta ctctcttctg ttatccaaat aagattaaat taaatcataa
481 ggaaaatatt tatagctttt aaattcttct ttatctaaat tcattagttt tacaattgct
541 gcaccttcaa gatcccaagt atctagagga tctcttaatc ttgtatgttt tttcatatat
601 tgatgtaaaa actcaatc ctttagtagct acaaattctt taataagctc gtgttctttg
661 cgaatacatt tgcgttctaa atttaagttt ttacccttag atcctataaa atgtaaaaac
721 caatctctat tgagaatc tcttcttttt ctctcatctt cttctattaa ttctaataca
781 caagcagtat ccatatctag taatactcta acacaaagtt caagagcatt tccatcaaac
841 cagctaatat ccaatccttt ttctaaacga tttttttctt tttctagtat gtatgcttct
901 aaatcttttt taactatgct tatatcatca ccacgagagt atttatccat agcaagatga
961 aattttctat cttctataca aaaaagacaa gtttctcttt gtccaaaagg aagctctaaa
1021 agtatttttt cggattcttt gatattcttct tcacttttcta ttatctcttt agtaaaatac
1081 gcttcatctt tactagtatc cttaccatt ttctatcctt tgggttttat tttatttgca
1141 tctttatcta aataatcaat agtttcttta cctccttcat caacatgaaa taaatctttt
1201 ctgacttcat tgctattaag aagttttttt atttcttttg cctgtttttc tcctacatta
1261 tctttaagct gttttagttt attctttatt aaccattcat cactcatttg cttagttttt
1321 ctatctaatt tgcttggtcc aaacttagct tctgcgatga tatatttttg gtttttatct
1381 ggattataat aaattccatc catttcatga tgaattttat catcaagccc tttgacttta
1441 tttaaactaa ttcttttata gccttttagct ttgtaaatatt tatccatttg catttcagca
1501 taattacctt tttgctgatt attttttggg tttttaaacc cactataaga ttaaattaaa
1561 tcataaggaa aatatttata gcttttaaat tcttctttat ctaaattcat tagttttaca
1621 attgctgcac cttcaagatc ccaagtatct agaggatctc ttaatcttgt a
```

//

LOCUS DMACINML\_32 1526 bp DNA linear 16-DEC-2020

DEFINITION Campylobacter species strain strain.

ACCESSION

VERSION

KEYWORDS .

SOURCE Campylobacter species

ORGANISM Campylobacter species

Unclassified.

COMMENT Annotated using prokka 1.13 from  
<https://github.com/tseemann/prokka>.

FEATURES

Location/Qualifiers

source

1..1526

/organism="Campylobacter species"

/mol\_type="genomic DNA"

/strain="strain"

gene

complement(92..1366)

/locus\_tag="DMACINML\_01840"

CDS

complement(92..1366)

/locus\_tag="DMACINML\_01840"

/inference="ab initio prediction:Prodigal:2.6"

```
/inference="similar to AA sequence:RefSeq:ALW35763.1"  
/codon_start=1  
/transl_table=11  
/product="mobilization protein"  
/protein_id="Prokka:DMACINML_01840"  
/translation="MPKVAASHCNPCKQPALNHNDRTNDNAKTITKELTHLNEYSCTS  
DEVKRNIEKLYKKAYENFYKYCENKNGLAKSGKPKGLQNFTKKEKCYHEFIYEIGENT  
TMEQCQELTQKIAELTGFTPLQVVIHRDEVSENAKGEKQTHYHAHAVFFTLDNNGLQL  
ARREASLNKGNLSKIQTLTAESLKMERGANNRYENNEKQPQYIQDYKIYAQFKEQEKAL  
LQRIQEQEHQLAQMALELKEKEKEIQDKAKELKSKENELQAKIEQYQKHIQTLELGH  
KALKELTQEFENRLSLWKNILTFGKHNAKVREDYQLTKKAFLVSTDESRRANKELEY  
LKFEYRKVRDDRDNLRTL FETQKKNDLETRIKEIGKWCEKNLSVEQLKEIFPLKAE  
RIEKELKYQRAFENSFEQVTKRNRDRLGLSR"
```

ORIGIN

```
1 tccgtgctac gcactcagac agccccgca ccccgattat cgcaaatcat agcacctttg  
61 gtgcgatttg ctaaagcacc aaaaaagaaa attatctact aagccctaac cctctatcgt  
121 ttcttttagt ttttacttgt tcaaaagaat tttcaaaagc tctttgatata ttaagttcct  
181 tttctattct ttcagctttt aatggaaata tttcttttaa ttgctccacg ctcaaatttt  
241 tttcgcacca cttgcctatt tcttttatcc gagtttctaa atcatcattt ttcttttttt  
301 gtggttcaaa caaagtcttt aaattatctc tatcatctct gactttacga tattcaaatt  
361 ttaaataattc aagctcttta ttagcttctc tcctgctttc atctgtgctt actaaaaaag  
421 ctttttttagt aagctgatag tcttctctta ctttagcatt gtgttttcca aaagttagaa  
481 tatttttcca taggcttagg cgattttcaa attccttgcgt aagttccttt aaggcttttt  
541 catgtcctag ctctaaagtt tgtatatggt tttgatattg ctctattttt gcttgcaatt  
601 cgttttcttt cgatttttagc tcttttagcct tgtcttgtat ctctttttct ttttctttca  
661 attctagagc catctgtgct aattgggtgtt cttgttcttg tattctttga agtaatgctt  
721 tttcttggtc tttaaattga gcataaattt tataatcttg tatatattgg ggttgctttt  
781 cgttattctc atagcgatta gctccacgct ccatTTTTaa actttctgca gttaggggtt  
841 gaattttgct aagattgcct ttattcaaac ttgcttcacg cctagcaagc tgtaagccat  
901 tgttatcgag tgtaaaaaat accgcgtggg cgtgataatg ggtttgtttt tcccctttag  
961 cattctcgct tacttcatct ctatggatta caacttgtaa aggtgtaa at cctgtaagct  
1021 ctgcaatttt ttgctgtaagc tcttgacatt gttccattgt agtatttttcg ccgatttcgt  
1081 atataaactc gtgatagcat ttttcttttt tagtaaaatt ttgaagtcct ttaggctttc  
1141 cgcttttagc taaaccattc ttattttcac aatatttata aaaattttca taagcttttt  
1201 tataaagctt ttctatgttc ttacgcactt catcgctagt gcaagaatat tcattttaa  
1261 gcgtgagttc tttggtgatg gtttttagcat tatcgttagt tctatcattg tgatttaacg  
1321 cgggttggtt tttaggattg caatgagagg cagcaacttt tggcattttt aaattctcct  
1381 tttggtggtt aaaaatgact aggcaaaaat caaaaaatct tttattgatt ttaattgatt  
1441 tttgctaggg agttaagggg ttttaaccct tacaagctcg atacttggca caagtggcgg  
1501 atagcttgta tccttcaata atataa
```

//

```
LOCUS DMACINML_33 1369 bp DNA linear 16-DEC-2020  
DEFINITION Campylobacter species strain strain.  
ACCESSION  
VERSION  
KEYWORDS .  
SOURCE Campylobacter species  
ORGANISM Campylobacter species  
Unclassified.  
COMMENT Annotated using prokka 1.13 from  
https://github.com/tseemann/prokka.  
FEATURES Location/Qualifiers  
source 1..1369  
/organism="Campylobacter species"
```

```

        /mol_type="genomic DNA"
        /strain="strain"
gene     31..810
        /locus_tag="DMACINML_01841"
CDS     31..810
        /locus_tag="DMACINML_01841"
        /inference="ab initio prediction:Prodigal:2.6"
        /inference="similar to AA sequence:RefSeq:CKG88098.1"
        /note="Uncharacterized protein conserved in bacteria%2C
putative lipoprotein"
        /codon_start=1
        /transl_table=11
        /product="hypothetical protein"
        /protein_id="Prokka:DMACINML_01841"
        /translation="MLAISANAQSPKEAKPSFDCAKATTKVEKIICNDKSGELQKLDL
LYSKLYFSILKSIPKNTKEGQETKKQMOKFAKNFIDYRDNMRCFLAKNDDEKEVEEV
FNKGRENGIMYENLDSVHFGFKPHHYKPCIVRVYKMGILLSTNTIIDTSFLIDKDTF
YTCKSNMILDIFSILKGLAKFRFYKLPQGYKETIIEASKALQELSSNGRYTQVCAFE
DEGFICTNGGCEFDLDEMQRVLIQPLDNFIQNIIDFRKLNAN"

```

ORIGIN

```

1 aagtttttaa tagttttagg atttgtgttta atgtttagcca ttagtgctaa tgcacaatcc
61 ccaaaagaag ctaaacctag ctttgattgt gctaaggcaa ctacaaaagt tgaaaagata
121 atatgtaatg ataaaagtgg ggaattacaa aaacttgata gattgtattc taaactctat
181 ttttcaatac taaagagtat cccaaaaaac acaaaagagg ggcaagagac aaaaaacaa
241 atgcaaaaat ttgctaaaaa ttttatagat tatagagaca atatgctgtg ttttttattg
301 gcaaaaaatg atgatgaaaa agaagtggaa gaagtattta acaaaggacg cgaaaatgga
361 ataatgtatg aaaatcttga ctcggttcat tttggtttta aaccacatca ttacaagcct
421 tgtatagcaa gagtttataa aatgggaatt ttattgctta gcaccaatac tatcatagat
481 acaagttttc tcatagacaa agatactttt tatacttgca agagcaatat gatactcgat
541 attttttcta ttaaaggttt agcaaagttt agattttaca ataaattggt tccacaagga
601 tataaagaaa ccattataga agcctccaaa gcattacagg aattaagctc aaatggctgc
661 tataactcaag tatgtgctgt tgaagatgag ggatttatat gcacaaatgg aggggtgtgag
721 tttgatttag atgaaatgca aactagagtt attcagccac ttgataatth tattcaaaat
781 atagatttta ggaaactaaa tgccaattaa gacaacaaat ttaagctatg aggaatttaa
841 aagcttacia ataaataaaa ttaatttcta tttaaaggag gtgttcttat gcaaaagtth
901 ttaatagctt taggattgtg tttaatgtta gccattagtg ctaatgcaca atctctaaaa
961 gaagctaaac ctagctttga ttgtgctaaa gcaagtacia aagtagaaaa gatgatttgt
1021 aatgataaaa gtggggagtt acaaaaactt gatagatata tggcaaagac atataaagaa
1081 ctaagacaga atctaaacia aatgagcaa aataagctth taacatcgca acgattatgg
1141 cttcaaacc taatcaatg caaatctaaa gaatgtgtaa aagagcttht gcaaaataga
1201 gttggagaat tgcaaaatta cacagcacac acgggcaatg tgtggcttgg gacttataca
1261 ttacaagaaa atctttatat ggggagctth acaataaaaa agtgtgataa gtttaattat
1321 tgtgaagcta gatatgaggc tatcctaaat aaaagtgaat ttaatgata

```

//

```

LOCUS      DMACINML_34          1070 bp    DNA        linear      16-DEC-2020
DEFINITION Campylobacter species strain strain.
ACCESSION
VERSION
KEYWORDS   .
SOURCE     Campylobacter species
ORGANISM   Campylobacter species
           Unclassified.
COMMENT    Annotated using prokka 1.13 from
           https://github.com/tseemann/prokka.

```

```

FEATURES             Location/Qualifiers
    source            1..1070
                     /organism="Campylobacter species"
                     /mol_type="genomic DNA"
                     /strain="strain"
    gene              197..577
                     /locus_tag="DMACINML_01842"
    CDS                197..577
                     /locus_tag="DMACINML_01842"
                     /inference="ab initio prediction:Prodigal:2.6"
                     /inference="similar to AA sequence:RefSeq:ABS43317.1"
                     /codon_start=1
                     /transl_table=11
                     /product="repeat motif-containing gene"
                     /protein_id="Prokka:DMACINML_01842"
                     /translation="MQGNIVKDCYISEGVKALFAVYFKDQTEESFFKALNEFAKENQI
ASQKIRDKTSREIKEELSKLVTSDLLNAKFDKVETRIDKFETSLNAKLDSFRTEVKTY
VIILAVLMFILQPTIFDFIISIFK"
    gene              697..1011
                     /locus_tag="DMACINML_01843"
    CDS                697..1011
                     /locus_tag="DMACINML_01843"
                     /inference="ab initio prediction:Prodigal:2.6"
                     /inference="similar to AA sequence:RefSeq:CKG85792.1"
                     /codon_start=1
                     /transl_table=11
                     /product="hypothetical protein"
                     /protein_id="Prokka:DMACINML_01843"
                     /translation="MQKNIQDCVVNVHSYDPNSPSGYKQDLFDISSEDFVREYEFVDS
SDLDDMVKHKQSDEVFKVFYKDKGKIRLLRISNMQALNHFHDLKGVMTKIILDSGFKP
DE"

```

ORIGIN

```

1 actaattcct attatthttg aaggaaagat aggcaaagat gcaataaact tttaaagaga
61 aataggctgt catactttca aacataatag aatagcaaga atagtattag tggatatttg
121 cataataaaa aaatgaaatt tttaaagaat tgaataacta tatgcagtaa ttatgatata
181 atgaaagaga aatacaatgc aaggtaatat agtgaagat tgttatattt cagaagggtgt
241 aaaagcttta tttgctgttt attttaaaga tcaaactgag gaaagtttct ttaaagctct
301 taatgagttt gctaaagaaa atcaaatagc atctcaaaag ataagagata aaacctctag
361 agaaattaaa gaagagcttt caaaattagt aacttcagat cttttaaatg ctaaatttga
421 taaggttgaa actagaatcg ataagtttga aacctcattg aatgctaagc tagatagttt
481 tagaacggaa gttaaaacat atgtaattat tcttgctggt ttaatgttta ttttacagcc
541 tacaattttt gattttatta tatctattht taataattt tttaaagaag caaggatttt
601 tttccttgct tgctcaacct ttttttattt taatthtttt tacgaagaat ttcaacttct
661 aaaaataaaa atthgtatta ttttaaagga tttaacatgc aaaaaaatat acaagactgt
721 gtgggttaat ttcattctta tgatccaaat tcaccaagcg gttataagca agatttgttt
781 gatatttcaa gtgaagattt tgttagagaa tatgaatttg tagatagttc tgatttggtat
841 gatatggtaa aacacaaaca aagtgatgaa gtttttaaag tgttttataa aaaagatggg
901 aaaataagac ttcttagaat tagtaatatg caggctttaa atcattttga tcatcttaag
961 ggtgtaatga caaaaataat tttagatagt ggttttaagc ctgatgaata gaaaagatta
1021 atatgcgtaa agatcaagaa tatgcagaag aaaggtttta tgggcaaaaa

```

//

```

LOCUS       DMACINML_35                971 bp    DNA    linear    16-DEC-2020
DEFINITION  Campylobacter species strain strain.
ACCESSION

```

VERSION  
 KEYWORDS .  
 SOURCE Campylobacter species  
 ORGANISM Campylobacter species  
 Unclassified.  
 COMMENT Annotated using prokka 1.13 from  
<https://github.com/tseemann/prokka>.  
 FEATURES Location/Qualifiers  
   source 1..971  
           /organism="Campylobacter species"  
           /mol\_type="genomic DNA"  
           /strain="strain"  
   gene 206..916  
           /locus\_tag="DMACINML\_01844"  
   CDS 206..916  
           /locus\_tag="DMACINML\_01844"  
           /inference="ab initio prediction:Prodigal:2.6"  
           /inference="similar to AA sequence:RefSeq:EAQ72616.1"  
           /codon\_start=1  
           /transl\_table=11  
           /product="methyl-accepting chemotaxis protein"  
           /protein\_id="Prokka:DMACINML\_01844"  
           /translation="MNAIHKIFEEYKSLDFRNKLDNASGNVEITTNALGDEIVKMLKQ  
                   SSDFANHLASESSKLSAVQNL TSSNSQAASLEETAAL EETSSMQNVSVKTS DVI  
                   TQSEEIKNVTGIIGDIADQINLLALNAAIEAARAGEHGRGFVVADEVKLAERTQKS  
                   LSEIEANTNLLVQSINDMAESIKEQTAGITQINESVAQIDQTTKDNVEIANESAIISN  
                   TVSDIANNILEDVKKKRF"

ORIGIN

```

1 catcaacgaa aacatccttg ctactaaaca aggtttagaa caagatgcta aagcagtaaa
61 agaaagtgtt gaaaccgtag gagtagtaga aagtggtaat cttactgcaa gaattacagc
121 taatcctaga aatccacaat taatagaact taaaaatggt cttaatagac ttttagatgt
181 tttacaaact aaagtaggat cagatatgaa tgctattcat aagatctttg aagaatataa
241 atcttttagac ttagaaata aacttgataa tgctagtggg aatgttgaaa tctactacaa
301 tgcttttaga gatgaaatcg ttaagatggt aaaacaaagt tctgactttg ctaatcactt
361 agccagtgaa agttctaaac ttcaaagtgc agttcaaac cttacttcat cttctaattc
421 tcaagcagct tctttggaag aaacagctgc tgcttttaga gagattactt cttctatgca
481 aaatgtttct gtaaaaacca gtgatgttat cactcaatct gaagagatta agaatgttac
541 aggtattatt ggagatattg cagatcaaat caatcttcta gcattaaatg ctgctattga
601 agctgcaaga gcaggagaac atggtagagg atttgcagtt gttgcagatg aagttagaaa
661 gctagctgaa agaactcaa agtctttatc tgaaatagaa gctaatacta atttattggg
721 tcaatctatc aatgatatgg cagaatctat taaagagcaa actgcaggta ttactcaaat
781 caatgagagt gtagctcaa ttgatcaaac tactaaggat aatgtagaga ttgctaataa
841 gtctgctatt atttctaata ctgtaagtga tatagctaat aatatacttg aagatgtgaa
901 aaagaaaagg ttttaattag agactgatat ataaaattta gattgatatg cgagtatcaa
961 tctaaagatt t

```

//

LOCUS DMACINML\_36 851 bp DNA linear 16-DEC-2020  
 DEFINITION Campylobacter species strain strain.  
 ACCESSION  
 VERSION  
 KEYWORDS .  
 SOURCE Campylobacter species  
 ORGANISM Campylobacter species  
 Unclassified.

COMMENT Annotated using prokka 1.13 from  
<https://github.com/tseemann/prokka>.

FEATURES Location/Qualifiers

source 1..851  
/organism="Campylobacter species"  
/mol\_type="genomic DNA"  
/strain="strain"

gene 37..363  
/locus\_tag="DMACINML\_01845"

CDS 37..363  
/locus\_tag="DMACINML\_01845"  
/inference="ab initio prediction:Prodigal:2.6"  
/codon\_start=1  
/transl\_table=11  
/product="hypothetical protein"  
/protein\_id="Prokka:DMACINML\_01845"  
/translation="MGSFTIKKCDKFNICEARYEAILNKSEFNDMHECDITLKLQIKS  
QQEAIALNDDKDFANCKIYIRKNQQGIVFIRDEKVFNSPDYFCSTMCGNQTI FEWGDI  
YKKEMQ"

ORIGIN

```

1 tggcttggga cttatacatt acaagaaaat ctttatatgg ggagctttac aataaaaaag
61 tgtgataagt ttaatatattg tgaagctaga tatgaggcta tcctaaataa aagtgaattt
121 aatgatatgc acgaatgcga tataactttg aaattacaga taaaatctca acaagaagct
181 atagctttta atgatgataa ggattttgca aattgtaaaa tttatattag gaaaaatcaa
241 cagggtattg tatttataag agatgagaaa gtattttaatt cacccgatta tttttgtagc
301 acaatgtgtg gcaaccaaac gatatttgag tggggagata tctataaaaa ggaaatgcaa
361 taatgcttta tgatgttaaa aattaaatg aaaatgatta taaaaaagaa tgtgcaaagc
421 ttcttattgc ttttgaaaat tcaaattata aacaagaaaa tgctatacat attgcaggca
481 atgtaactat tggatatgga cttgatttaa agacaggaaa taatccaaag ttacttttag
541 aagggtattt accagatgat tctaaaaaac ttaaaatagg agatgaagaa ttaacttttt
601 atgaaattat agagaaatat agagccaata aggcaggttt tacagacca aagatagtaa
661 aaggttattt acaaaataaa gtgtttaatt tttcgcttac gcaagaacaa gcccaagaaa
721 ttttggaaag aacctttgat tcatataaaa agtatatatt acaatatatt ggcgataact
781 tgttgaata tagtcaagaa aaagcttctt tggtttcttt acattatcat ggcagattta
841 ataatatcaa a

```

//

LOCUS DMACINML\_37 794 bp DNA linear 16-DEC-2020

DEFINITION Campylobacter species strain strain.

ACCESSION

VERSION

KEYWORDS .

SOURCE Campylobacter species

ORGANISM Campylobacter species

Unclassified.

COMMENT Annotated using prokka 1.13 from  
<https://github.com/tseemann/prokka>.

FEATURES Location/Qualifiers

source 1..794  
/organism="Campylobacter species"  
/mol\_type="genomic DNA"  
/strain="strain"

gene 36..503  
/locus\_tag="DMACINML\_01846"

CDS 36..503

```

/locus_tag="DMACINML_01846"
/inference="ab initio prediction:Prodigal:2.6"
/codon_start=1
/transl_table=11
/product="hypothetical protein"
/protein_id="Prokka:DMACINML_01846"
/translation="MIIWNMTFGWGWFPYSLQPSYHEFKEMCKLNELPNDEHKYNKI
LSYFGLSLDTLDWENIKKNSTLLTQGYLEYNSQNDRYMYRYENKSDPRIRKVFLLFFN
DSIKLSNLYKIDFEVFWNDKRDYIHTKVTSYDTVIEENFRTCGYFSGYLKGIK"

```

ORIGIN

```

1 ttctaaaaat atcaagtttt attctacttc ctttgatgat tatatggaat atgacatttg
61 gttgggggtg gtttgtgcct tatagcctac aaccgagtta tcacgaattt aaagagatgt
121 gtaagcctaa tgaacttcca aatgatgaac acaaatataa taagattcta agttattttg
181 gattaagttt ggatacattg gattgggaaa atattaataa aaattcaaca ttattaacac
241 aaggttattt agaatataat tcacaaaatg atagatatat gtatcgatat gaaaataaaa
301 gtgatccaag aataagaaaa gtttttttct ttttttttaa tgacagtata aagctaagca
361 atctttataa aatagatttt gaagtatttt ggaatgataa aagagattat attcatacaa
421 aagtaacttc ttatgatact gtaatagaag agaactttag aacttgtgga tatttttagt
481 gatacttgaa aggaatcaaa taatgcacca taaacagcaa atacaaaagt ttagagataa
541 cgcagaatta gcttgggcaa gttatgggta ttttgacttt atagacaagc aatatagctt
601 tgatgaaaag gataaaaatg aattttaaac tttatatgca aaaataaatg atatagatga
661 aagtaacgaa aaagtgcaaa atgccaaagc tacctacacc gacattctca atatggaata
721 taattcctta tttgatggcg acttctcccc actccaagct aaacaattct tttctcgcta
781 tgatttatta aaac

```

```

//
LOCUS          DMACINML_38                783 bp    DNA        linear        16-DEC-2020
DEFINITION     Campylobacter species strain strain.
ACCESSION
VERSION
KEYWORDS       .
SOURCE         Campylobacter species
  ORGANISM     Campylobacter species
               Unclassified.
COMMENT        Annotated using prokka 1.13 from
               https://github.com/tseemann/prokka.
FEATURES       Location/Qualifiers
   source      1..783
               /organism="Campylobacter species"
               /mol_type="genomic DNA"
               /strain="strain"
   gene        121..564
               /locus_tag="DMACINML_01847"
   CDS         121..564
               /locus_tag="DMACINML_01847"
               /inference="ab initio prediction:Prodigal:2.6"
               /inference="similar to AA sequence:RefSeq:AVS37499.1"
               /codon_start=1
               /transl_table=11
               /product="ankyrin repeat domain-containing protein"
               /protein_id="Prokka:DMACINML_01847"
               /translation="MHEWILCGEEVKYLEEALKLGANPNMRSIKTENKSSFTNAGETL
LHQAAESDEKPIGACVEVLIKYGADVNAVNCGINKIEDGKISYYKPATPLDRANTYDI
SKNIKILKKAGAKTWKELVEEYNIDTSLERIEQIKMYEERRKDKK"

```

ORIGIN

```

1 ggatacaatg cactcagtag atatatcgat agagatggaa aaaataaaga agtaatagag
61 tattttttta aaaaaggatg cacatttgaa acttataatg aagaaagtgg cgatactcct
121 ttgcatgaat ggatactatg tggcgaagaa gtgaagtatt tagaagaagc tttaaaacta
181 ggagcaaatc ctaatatgag aagtattaa acagaaaata aatcaagttt tactaatgca
241 ggagaaaccc ttttaccatca agctgcagaa tctgatgaga aacctatagg agcttgcgtg
301 gaagtgctaa tcaaatatgg agctgatgtg aatgcagtta attgcggtat aaacaagatt
361 gaagatggaa aaatcagcta ttataaacct gcaaccccat tggatagagc caacacctat
421 gatataagca aaaatataaa aatcttaaaa aaagcaggag ctaagacttg gaaagaattg
481 gttgaagaat acaatatcga tacaagctta gaaagaatag aacaaattaa aatgtatgaa
541 gaaagaagaa aagataaaaa ataaaaggaa aaattatgga ttttaacaca gatatttttag
601 aaagcttaga taatttcaaa gcatttttag acacaaaacc tagcaaagaa cttttaaagg
661 cagtaaaaaa ttatatagat gattttatgg aaggtgcgta tgataattta gatccagaaa
721 actatgaagt tgcttttgaa gaagatactg gcatacctta tgatgaagca gatgaggatg
781 aat

```

//

LOCUS DMACINML\_39 758 bp DNA linear 16-DEC-2020

DEFINITION Campylobacter species strain strain.

ACCESSION

VERSION

KEYWORDS .

SOURCE Campylobacter species

ORGANISM Campylobacter species  
Unclassified.

COMMENT Annotated using prokka 1.13 from  
<https://github.com/tseemann/prokka>.

FEATURES Location/Qualifiers

source 1..758

/organism="Campylobacter species"  
/mol\_type="genomic DNA"  
/strain="strain"

gene 91..486

/locus\_tag="DMACINML\_01848"

CDS 91..486

/locus\_tag="DMACINML\_01848"  
/inference="ab initio prediction:Prodigal:2.6"  
/codon\_start=1  
/transl\_table=11

/product="hypothetical protein"  
/protein\_id="Prokka:DMACINML\_01848"  
/translation="MFLLPVYLLLFLAGGCSYKYM DPQYYEFRSLCYFNLGKVLIEDE  
SIKNTNIIIVTPKSKQIKDRIVETRFERKNENQVVYYRINTYFYDNYGIFLKGDEGAG  
LYFRYMEVLSCKNIDKFKKDDWQVETLE"

gene 490..630

/locus\_tag="DMACINML\_01849"

CDS 490..630

/locus\_tag="DMACINML\_01849"  
/inference="ab initio prediction:Prodigal:2.6"  
/codon\_start=1  
/transl\_table=11

/product="hypothetical protein"  
/protein\_id="Prokka:DMACINML\_01849"  
/translation="MSKNIKTQEAKLDLITKFLDYANIADASYAMLHLIDENDEKGF  
LKG"

ORIGIN



```

1 attatthttat attttatctt taaaattttt tataaattaa aaaataaaac aaaaactata
61 aatthttaaaa caatattthaa aaaattttact ttgtttcttt tacctgtata tctthttatta
121 ttcttagcag gaggatgttc ttataaatat atggatccgc agtattatga gtttaggagc
181 ttgtgttatt ttaatttggg aaaagtgttg attgaggatg aatctataaa gaataaaaacg
241 aatataatag taacacctaa aagtaagcaa ataaaagata ggatagtggga aactagattt
301 gaaagaaaaa atgaaaacca agtagtgtat taticgtatta atacatattt ttatgataat
361 tatggtatat tcttgaaagg cgatgagggt gctggattat atthttagata tatggaagta
421 ttaagttgta agaattttga caaaaaattt aagaaagatg actggcaagt tgaaactttg
481 gaataacaaa tgagcaaaaa cattaaaaca caagaagcta aattagactt aatcactaaa
541 thtttagact atgctaatat agctgatgca agttatgca tgthtgcattt aatcgatgag
601 aatgatgaaa aaggtthttt aaaaggataa taatgctaga atthctthgtt aatctthttaa
661 tathttattct tatathtttc thttthgttt ttatathttc taththttta taththttatct
721 ttaaagtctt thtttaaaata aaaaataaaa caaaaact

```

//

LOCUS DMACINML\_40 714 bp DNA linear 16-DEC-2020

DEFINITION Campylobacter species strain strain.

ACCESSION

VERSION

KEYWORDS .

SOURCE Campylobacter species

ORGANISM Campylobacter species  
Unclassified.

COMMENT Annotated using prokka 1.13 from  
<https://github.com/tseemann/prokka>.

FEATURES Location/Qualifiers  
source 1..714  
/organism="Campylobacter species"  
/mol\_type="genomic DNA"  
/strain="strain"

ORIGIN

```

1 gaatthtaaag attggcaaag catataththa aaagatccca ttaaaggaag catagctctt
61 tggactaaag cagaaaaagc ttattataaa tctthtaaaa ccaaaagaga aagatataaa
121 tatctagtga ttagaagtgg tataagaagc actgttatag atatacccta tgatgcttat
181 tgtaatgtag atgaaaaagg ataththaatc aatgaagaat acgcctatat ttatgatgaa
241 gttaacaata ataaagaaac cctaaaatct tctctthttta gacaagaatg gggtatagca
301 gcaggaatac taggaaaacc tgaatathttt gtgcgttcta aaaatcatgg ctthaatgcc
361 agaatgatac aatgthtttat thttatathatt caactcacag gtggaggata tgaagaatta
421 ggtataaaaa gaggaattta taattatgct gataatcttt tagaaatagg tataggatg
481 gcagggatac ataaaaatcc thttaagggt aaattagtaa aagatttagc taaaactata
541 cagcctgatg aathttggtat gctaccttht atagatgaga ttatgggagt agattgggtg
601 attgaththa ataaatathga thttgcctat gatgaagaag gtagaatcat ttgggctthta
661 tataatgata ttgaaaaagg taaathhaaa gatccaagag atgtggattc tact

```

//

LOCUS DMACINML\_41 641 bp DNA linear 16-DEC-2020

DEFINITION Campylobacter species strain strain.

ACCESSION

VERSION

KEYWORDS .

SOURCE Campylobacter species

ORGANISM Campylobacter species  
Unclassified.

COMMENT Annotated using prokka 1.13 from  
<https://github.com/tseemann/prokka>.

FEATURES Location/Qualifiers

```

source      1..641
            /organism="Campylobacter species"
            /mol_type="genomic DNA"
            /strain="strain"
gene        complement(154..510)
            /locus_tag="DMACINML_01850"
CDS         complement(154..510)
            /locus_tag="DMACINML_01850"
            /inference="ab initio prediction:Prodigal:2.6"
            /inference="similar to AA sequence:RefSeq:APB39663.1"
            /codon_start=1
            /transl_table=11
            /product="VgrG protein"
            /protein_id="Prokka:DMACINML_01850"
            /translation="MKGNKKEVVEGKLELHVNKGINYFTEEHFSMQTNNYIDIYTEQN
LSTQTKKQHTELAESKYSDFTDCEVKAGNQILHQVGDQTQIVTKKDCVIIKAGGVEVI
IDSNGLVVRGGELKAE"

```

ORIGIN

```

1 tacatattat cttttcaact tttgtagttg ccttagcaca atcaaagcta ggtttagctt
61 cttttgggga ttgtgcatta gcactaatgg ctaacattaa acacaatcct aaaactatta
121 aaaacttttg cataagaact cctttaattht attttactct gccttaagct ctccacctct
181 aaccacaagt ccattagagt ctataatcac ttctactcca cctgctttaa tgataacaca
241 atctttctta gtaacaattht gagtatcacc tacttgatgg aggatttgat tgcctgcttht
301 tacttcacaa tctgthttgaa agtcactata tttagattct gcaagthttg tatgthttgtht
361 tttggthttgc gtgctthaaat tttgthttctgt gtatatatca atgthaaatgt tagthttgcat
421 actaaaatgt tcttccgtaa agthaaattht tcctthtatta acatgthagct caagthtttcc
481 ctcaaccacc tcctthtttat thccctthcac atthctthtct tcathcttht ggthaaatagtht
541 atthttgatttht gcacctattht ctathatcttht gthttthctct acaaatctcat gagagthtttht
601 agctathtcttht actthtattat ctactctctac atthtaaagtht t

```

//

LOCUS DMACINML\_42 578 bp DNA linear 16-DEC-2020

DEFINITION Campylobacter species strain strain.

ACCESSION

VERSION

KEYWORDS .

SOURCE Campylobacter species

ORGANISM Campylobacter species  
Unclassified.

COMMENT Annotated using prokka 1.13 from  
<https://github.com/tseemann/prokka>.

FEATURES Location/Qualifiers

```

source      1..578
            /organism="Campylobacter species"
            /mol_type="genomic DNA"
            /strain="strain"
gene        27..179
            /locus_tag="DMACINML_01851"
CDS         27..179
            /locus_tag="DMACINML_01851"
            /inference="ab initio prediction:Prodigal:2.6"
            /inference="similar to AA sequence:RefSeq:CKG86653.1"
            /codon_start=1
            /transl_table=11
            /product="hypothetical protein"

```

/protein\_id="Prokka:DMACINML\_01851"  
/translation="MYNINCFRTQKGTKYLNEILAPKFYNYKDLVEIDDKGNVLRW  
IGEINR"

ORIGIN

1 tttgggggaa tttggataat tgggatatgt ataatatcaa ttgctttcgc actcaaaaag  
61 gcacaaaata tctcaatgaa atcttagctc ctaaatttta taacaaatac aaagatttag  
121 aagtagagat tgatgataag ggtaatgtgc ttaggtggat tggagagatt aatagatgag  
181 tttatttgga ttttacattg gattttacaa aggataaata atgagcgaac cttatgagat  
241 ttatacacc aatgggttaa cattagatgt ggaaaaagat accaataaaa tactatttaa  
301 agaaaatatt aaaccacag gcaattatac tcaagaatat tccaaagcgg tttttgaatc  
361 ttattatatt atgaaaaact ccccctacaa agactataaa ccaatatatc tagatcctaa  
421 cttttataca ggagagaaat ccactctagt agaatttaa gattggcaaa gcatatattt  
481 aaaagatccc attaaaggaa gcatagctcc ttggactaaa gcagaaaaag cttattataa  
541 atcttataaa accaaaagag aaagatataa atatctag

//

LOCUS DMACINML\_43 572 bp DNA linear 16-DEC-2020

DEFINITION Campylobacter species strain strain.

ACCESSION

VERSION

KEYWORDS .

SOURCE Campylobacter species

ORGANISM Campylobacter species  
Unclassified.

COMMENT Annotated using prokka 1.13 from  
<https://github.com/tseemann/prokka>.

FEATURES Location/Qualifiers

source 1..572  
/organism="Campylobacter species"  
/mol\_type="genomic DNA"  
/strain="strain"

ORIGIN

1 aatgctagaa ttctttgta atcttttaat atttattctt atatTTTTct tttttgTTTT  
61 tatatTTTTct attatTTTTat atTTTatctt taaagtcttt tttaaaataa aaaataaaac  
121 aaaaactata aatTTTaaaa caatgTTTaa aaaacttgct ttatTTcttt tacctgtata  
181 tcttttatta ttcttagcag gaggatgttc ttataaatat atggatccgc aatattatga  
241 atttaagaag ttgtgtaaag ataatagtaa taaaatgata gtgtTTaata aagattattt  
301 ggattTaaaa aaacaatttg ttcaagctat gacgaataat tctaataata gaattaaaaa  
361 taatgggata aaatattTTTT ataatgaaaa attgaatttg gaaattcaac cttcaaattg  
421 gaaagaaata gaaactaaat cacgcgaaat taaacttgga ataggaaaaag taaaagaaaa  
481 agaaatagaa gcttgggata ttgatgataa aaataacatt aagtatcaag aatTTTaaacg  
541 atatTTgtat tataattata gtatattTTTT ag

//

LOCUS DMACINML\_44 564 bp DNA linear 16-DEC-2020

DEFINITION Campylobacter species strain strain.

ACCESSION

VERSION

KEYWORDS .

SOURCE Campylobacter species

ORGANISM Campylobacter species  
Unclassified.

COMMENT Annotated using prokka 1.13 from  
<https://github.com/tseemann/prokka>.

FEATURES Location/Qualifiers

source 1..564

```

/organism="Campylobacter species"
/mol_type="genomic DNA"
/strain="strain"
gene complement(129..554)
/locus_tag="DMACINML_01852"
CDS complement(129..554)
/locus_tag="DMACINML_01852"
/inference="ab initio prediction:Prodigal:2.6"
/inference="similar to AA sequence:RefSeq:CKG86435.1"
/codon_start=1
/transl_table=11
/product="hypothetical protein"
/protein_id="Prokka:DMACINML_01852"
/translation="MQIPIYSKLGKLESKIDNIISSGQIAWFVCSVGIFIIIPMIYFY
ISNNYDQFTILFIMIFIFILNMFYTKNFFALLLVILIFIYIKYHEFIYNFKILFFIF
APIILIFLAWRILITFLCGYIFLVAMVYIFELLGGFYK"

```

ORIGIN

```

1 atcaggactt ttgcctttgg caagtcctaa aaaggcatgg gtgaaatctt ctctttgcca
61 ataactga tttttaaata ccaaaaaaca ttctaccaat ggatcaatat aaattgttac
121 ataatatttc atttataaaa tcctcctaata aactcaaata tatataccat agccactaaa
181 aaaatataatc cgcataaaaa agttattaga attctccaag cccttaaaaa gataagaatt
241 ataggtgcaa aaataaaaaa taaaatttta aaattataga taaactcatg atattttata
301 tatataaata tcaatattac aagtaataat aatgcaaaaa aatttttagt ataaaacata
361 tttaatataa aaataaatat cataataaat aaaatagtga attgatcata attgttgctg
421 atataaaaaat atatcatagg aatgataaaa ataccacgc tacacacaaa ccaagcaatt
481 tgcccacttg atatattgtc tattcctttg ctttctagtt ttgctttgag tttagaataa
541 ataggaattt gcaaatattac tcct

```

//

LOCUS DMACINML\_45 563 bp DNA linear 16-DEC-2020

DEFINITION Campylobacter species strain strain.

ACCESSION

VERSION

KEYWORDS .

SOURCE Campylobacter species

ORGANISM Campylobacter species  
Unclassified.

COMMENT Annotated using prokka 1.13 from  
<https://github.com/tseemann/prokka>.

FEATURES Location/Qualifiers

source 1..563

/organism="Campylobacter species"  
/mol\_type="genomic DNA"  
/strain="strain"

gene 137..511

/locus\_tag="DMACINML\_01853"

CDS 137..511

/locus\_tag="DMACINML\_01853"

/inference="ab initio prediction:Prodigal:2.6"

/codon\_start=1

/transl\_table=11

/product="hypothetical protein"

/protein\_id="Prokka:DMACINML\_01853"

/translation="MTMQIIQDQIPQELSGRMTKQSLERLANHLHIATQNEMGDIPLW  
LLWDLAITCKQLDLKENYQKVLIEIQMNETQHKANLAEQRADLAEQRAEKAEQRAEK

AEQLYQQIKNFRISMMKKYQTN"

ORIGIN

```

1 gagatgagta tgagaattta aactttggaa atcatatgca ctttaatgct aaaaatcaag
61 agcagttttt taaaatgatt gaaaccttta gaaaaggat cagataagcg aaaaagacaa
121 aacaggaga aagaaaatga caatgcaaat aatacaagat caaattccac aggaattgtc
181 agggagaatg acaaaacaga gcctagagag attagcaaat catcttcaca tagcgaccca
241 aaacgaaatg ggggatattc cactatggct actttgggac ttagcgataa cttgcaaaca
301 attagattta aaagagaatt atcagaaaatg cttaatagaa atacagatga acctagaaac
361 acagcacaaa gcaaacttag cagagcagag agcagactta gcagagcaga gagcagagaa
421 agcagagcag agagcagaga aagcggagca attatatcag caaataaaga atttcagaat
481 atcaatgatg aaaaaatc aaacaaatta aataaagaag aaagcaagga atttaatc
541 cccgctctaa gacggggcaa cct

```

//

LOCUS DMACINML\_46 559 bp DNA linear 16-DEC-2020

DEFINITION Campylobacter species strain strain.

ACCESSION

VERSION

KEYWORDS .

SOURCE Campylobacter species

ORGANISM Campylobacter species  
Unclassified.

COMMENT Annotated using prokka 1.13 from  
<https://github.com/tseemann/prokka>.

FEATURES Location/Qualifiers  
source 1..559  
/organism="Campylobacter species"  
/mol\_type="genomic DNA"  
/strain="strain"

ORIGIN

```

1 gatacttggg atcttgaagg tgcagcaatt gtaaaactaa tgaatttaga taaagaagaa
61 tttaaaagct ataaatattt tccttatgat ttaatttaat cttatttggg taacagaaaa
121 gagtagagat agacttggca ttgtagataa aaaagatagg gaaaaaatag aagaacttct
181 tgaaaaaaat agcaatgaag tcagaaaaga tttatttcat gttgatgaag gaggtaaaga
241 aactattgat tatttagata aagatgcaaa taaaataaaa cccaaggat aaaaaatgct
301 aagagatact aagagagatg aagcgtatct tacgaaacat ataatagagt gtgaagaaga
361 aattaaagaa gatgaaaaaa tacttttaga gcttcctttt ggaaaaagag aaacttgtct
421 tttttgtata gtagatagaa aaaaatgtat tgctatggat aaatactctc gtggtgatga
481 tataaatcta gttaaaaaag atttagaagc acttatgcta ttaagacaaa aaaatcgttt
541 agaattaggt ggattttagt

```

//

LOCUS DMACINML\_47 541 bp DNA linear 16-DEC-2020

DEFINITION Campylobacter species strain strain.

ACCESSION

VERSION

KEYWORDS .

SOURCE Campylobacter species

ORGANISM Campylobacter species  
Unclassified.

COMMENT Annotated using prokka 1.13 from  
<https://github.com/tseemann/prokka>.

FEATURES Location/Qualifiers  
source 1..541  
/organism="Campylobacter species"  
/mol\_type="genomic DNA"

/strain="strain"

ORIGIN

```
1 ttttttgatt ttgcggcatt taaatcaaca tcgccttttg cattaattgt tatgcatca
61 ccttttgctt caactccatt taaaacaata tttccttttg tacttttctat atttaaatta
121 ccgccagcat tcattttaga aatattttca ctagaatfff cgcttttatc gtggttaaat
181 tttaatccca cagtttgttt agaatcagca ctgataaggt tgctcgtaaa tagatttcca
241 gcattagcta aaacttgaga agctactatt ccataattta tgcctagatt ttgtttctca
301 gcagctgcat tttgtactga ctgattaata acagacgcta taggactacc tgcttcgata
361 acctctttag cgtataaact aaatcctgtg ctattttctg tcttaacatc ttcataatfta
421 gaactagcaa tgtcccctgc ttttaagatta atatctttat ctgcttcaaa attagcacca
481 cctatatcca aggtattatt tgccttgata ttaatatttg cacctttgat ggtgtagaa
541 g
```

//

LOCUS DMACINML\_48 502 bp DNA linear 16-DEC-2020

DEFINITION Campylobacter species strain strain.

ACCESSION

VERSION

KEYWORDS .

SOURCE Campylobacter species

ORGANISM Campylobacter species

Unclassified.

COMMENT Annotated using prokka 1.13 from  
<https://github.com/tseemann/prokka>.

FEATURES Location/Qualifiers

source 1..502

/organism="Campylobacter species"

/mol\_type="genomic DNA"

/strain="strain"

ORIGIN

```
1 aaaaatataa aaatcttaaa aaaagcagga gctaagactt gggaagaatt ggttgaagaa
61 tacaatatcg atacaagctt agaagaacca gaacaaatta aaatgtatga agaaagaaga
121 aaagataaaa aataaaagga aaaacaatga aaacattaga agaattaata gctttagaag
181 aaaaatatct aaaagaatta tgtttagaat tttatgatct tgtagaggct aacaaacttg
241 aagaagttaa agaattttta aaagactatc ctgtacctga aatattcttt gaaaaatgct
301 ataaagcata ttatgattat aaagaaagag ctattatcga tactgctatc actttagctt
361 gtgcaggact tgcttatgat aaaagtaaaa gttttgaaat gatggagtat tttgaaagcc
421 taggacttaa agctgatgaa gtacactttg gatacaatgc actcagtaga tatatcgata
481 gagatggaaa aaataaagaa gt
```

//

LOCUS DMACINML\_49 499 bp DNA linear 16-DEC-2020

DEFINITION Campylobacter species strain strain.

ACCESSION

VERSION

KEYWORDS .

SOURCE Campylobacter species

ORGANISM Campylobacter species

Unclassified.

COMMENT Annotated using prokka 1.13 from  
<https://github.com/tseemann/prokka>.

FEATURES Location/Qualifiers

source 1..499

/organism="Campylobacter species"

/mol\_type="genomic DNA"

/strain="strain"

ORIGIN

```
1 gataacttggg atcttgaagg tgcagcaatt gtaaaactaa tgaatttaga taaagaagaa
61 tttaaaagct ataaatattt tccttatgat ttaatttaat cttatttggg taacagaaaa
121 gagtagaat agacttggca ttgtagataa aaaacatagg gaaaaaatag aagaacttct
181 tgaaaaaaat agcaatgaag tcagaaaaga tttatttcat gttgataaaa aaggcaatgt
241 gagtattaaa gaattagata aaaatgcaaa aaccaaaaac ttaatagaaa ggatagaaaa
301 tggtaaggga tactaagaga gatgaagcgt attttacgaa acatataata gagtgtgaag
361 aagatatcaa agaatccgaa aaaatacttt tagagcttcc ttttgaaaa agagaaactt
421 gtcttttttg tataacagat agaaaaaaat gtattgctat ggataaatac tctcgtgggtg
481 atgatataaa tctagttaa
```

//

LOCUS DMACINML\_50 495 bp DNA linear 16-DEC-2020

DEFINITION Campylobacter species strain strain.

ACCESSION

VERSION

KEYWORDS .

SOURCE Campylobacter species

ORGANISM Campylobacter species

Unclassified.

COMMENT Annotated using prokka 1.13 from  
<https://github.com/tseemann/prokka>.

FEATURES Location/Qualifiers

source 1..495

/organism="Campylobacter species"

/mol\_type="genomic DNA"

/strain="strain"

ORIGIN

```
1 aattcttccc aagtcttagc tcctgctttt tttagattt ttatattttt atttatatcg
61 taagtattag cttcatccaa tggagtagca ggatcataat attcaatttt cccatcttca
121 atatcacata taccacaatt aactgcattt acatcagctc catattttag tagcacttcc
181 acacaagctc ctataggctt ttctttactt cttgcagctc tatgcaaaag ggtttctcct
241 gcaccactaa agctaaattt attttctggt ttaattcttc tcatattagg atttgctcct
301 aattttaaag cttcttctaa atacttcact tcttcgccac atagtatcca ttcattgcaaa
361 ggagtgtctg cacttttttc attataagtt tcaaatgtgc atcctttttt aaaaaaatac
421 tctattactt ctttattttt tccatctcta tcgatatac tactgagtgctc attgtatcca
481 aagtgtactt catca
```

//

LOCUS DMACINML\_51 494 bp DNA linear 16-DEC-2020

DEFINITION Campylobacter species strain strain.

ACCESSION

VERSION

KEYWORDS .

SOURCE Campylobacter species

ORGANISM Campylobacter species

Unclassified.

COMMENT Annotated using prokka 1.13 from  
<https://github.com/tseemann/prokka>.

FEATURES Location/Qualifiers

source 1..494

/organism="Campylobacter species"

/mol\_type="genomic DNA"

/strain="strain"

ORIGIN

```
1 cctaatacaa attcaggttt ttctgctact ttatttggag aaaaaagaaa acaaattgat
```

```
61 agtaaaacta aagaaaaaag ctataaccagt gaatatggct atatcaatta tatttttagct
121 attagaggaa cagaaatgag ttctttttaa gatttgcttg tagctgatgc ttcttttagcc
181 ataggctcta tacctaaagc ccaatatgat gatatgataa actttttatga aactttgtatt
241 aaagattatc cacaaatcaa agaaaaagac tctcttacca ttacaggaca ctctcttgga
301 ggctgtcttg cacaactctt tgctttaagt atctgtgatg ataagaatag aaacaatatc
361 aaagctttat atacctataa tgcacctgga gctagaaaga taatacctcc ttatgattat
421 atagtcaaac tctttatatt tcacagtaaa gaacaacaag aaagatttat aaaagaagaa
481 atagaaaata tagc
```

//

LOCUS DMACINML\_52 474 bp DNA linear 16-DEC-2020

DEFINITION Campylobacter species strain strain.

ACCESSION

VERSION

KEYWORDS .

SOURCE Campylobacter species

ORGANISM Campylobacter species  
Unclassified.

COMMENT Annotated using prokka 1.13 from  
<https://github.com/tseemann/prokka>.

FEATURES Location/Qualifiers  
source 1..474  
/organism="Campylobacter species"  
/mol\_type="genomic DNA"  
/strain="strain"

ORIGIN

```
1 cctaaagagt gtcccactaa agtaatttta tcaaagcaaa attctttttt tatttagcgta
61 taaaatttca ataaagaatt gcattgtttt ttaggaattt ttccatttag aagtataaaa
121 tactgatca aatctccaaa atcaaatttt aaaggcttta aatcacttcc tgcgatagct
181 aaaataaatt cttgattttc cttgttttga aataagcttg ccctaaatcc accttttgat
241 tcaagacatt ctttattaat gtgagcaagt aaatcaaatc tcttgataaa atcaaagcc
301 atcaaagggt caaattttcc tattgtaacg cattcttttt gaaaaatatt atgggttaaa
361 accttaaca atgtttttct atctatattt aaaaaaattg ttgtatttaa attaagataa
421 gcagcatgag aaagcaaagt gtaatgatat aaatgcatta gagcattttt attt
```

//

LOCUS DMACINML\_53 470 bp DNA linear 16-DEC-2020

DEFINITION Campylobacter species strain strain.

ACCESSION

VERSION

KEYWORDS .

SOURCE Campylobacter species

ORGANISM Campylobacter species  
Unclassified.

COMMENT Annotated using prokka 1.13 from  
<https://github.com/tseemann/prokka>.

FEATURES Location/Qualifiers  
source 1..470  
/organism="Campylobacter species"  
/mol\_type="genomic DNA"  
/strain="strain"

ORIGIN

```
1 gtgtatggag gcgtgtttta ccgtggaaga taaaaaatg ccgggttaac gaaccgga
61 ttatcatcac tcttcgctgg attgctcctg catttttgta ccgcttgctg tgcggcgctt
121 accgatattt tttgtatcgc ggtgacgttt cttcacgcgc ggcttctctt tttctttctc
181 ttttttcttc tcggcgcggt tcgccagcac ttttttcgac ggtttgccgg tcagcttttc
```



```
241 gctgggcgca cgcgtggctg ggcgaagctc atcaatgacg cgcgctttta gcggtctttc
301 gatgtagcgg ccgattttca gcagcaacag atggctcgtgg gcttctacca gcgagattgc
361 agtgcctttg cggccagcac ggcctgtacg accaatgcga tgcagatagg tatcgccact
421 gcgcggcatg tcgaagttaa tgacgtggct gacgtcagga atatcaatcc
```

//

LOCUS DMACINML\_54 462 bp DNA linear 16-DEC-2020

DEFINITION Campylobacter species strain strain.

ACCESSION

VERSION

KEYWORDS .

SOURCE Campylobacter species

ORGANISM Campylobacter species

Unclassified.

COMMENT Annotated using prokka 1.13 from  
<https://github.com/tseemann/prokka>.

FEATURES Location/Qualifiers

source 1..462  
/organism="Campylobacter species"  
/mol\_type="genomic DNA"  
/strain="strain"

ORIGIN

```
1 gcgctggctg gtcggatgtg ggttcctggt cctcactttg ggatatatcg aataaagatc
61 atcagagaaa tgttttaaaa ggagatatct tcgcacatgc ttgtaatgat aattacattt
121 attccgaaga tatgtttata agtgcgattg gtgtaagcaa tcttgtcatt gttcaaacaa
181 cagacgcttt actggtggct aataaagata cagtacaaga tgttaaaaaa attgtcgatt
241 atttaaacg gaatgatagg aacgaatata aacatcatca agaagttttc cgcccctggg
301 gaaaatataa tgtgattgat agcggcaaaa attacctcgt tcgatgtatc actgttaagc
361 cgggtgagaa atttgtggcg cagatgcatc accaccgggc tgagcattgg atagtattat
421 ccgggactgc tcgtgttaca aaggagagac agatttatat gg
```

//

LOCUS DMACINML\_55 461 bp DNA linear 16-DEC-2020

DEFINITION Campylobacter species strain strain.

ACCESSION

VERSION

KEYWORDS .

SOURCE Campylobacter species

ORGANISM Campylobacter species

Unclassified.

COMMENT Annotated using prokka 1.13 from  
<https://github.com/tseemann/prokka>.

FEATURES Location/Qualifiers

source 1..461  
/organism="Campylobacter species"  
/mol\_type="genomic DNA"  
/strain="strain"

ORIGIN

```
1 ggcttcaacc gtttcttttt cgatcagcat atcgatagca tcggtcaact gaatttcac
61 cccggcgccc ggaggggttt tcgccagcaa cgcccagata tccgcgctca acacataacg
121 cccgacaatc gcaaggttag acggcgcgac atccgctttt ggtttttcaa ccacgccaac
181 catcggcaca ctttcgcccg gtgccagctc aacgccttta caatcgacca cgccgtatgc
241 agtcacatct tctactggct caaccataat ctggctattg ccggtttcat cgaaacggcg
301 gagcatttca gccaggttat cctgagacag gtcggactca tattcgtcaa gaataacgct
361 tggcagaata acagcgacag gttcgtttcc gacaacggga tgcgcgcaca atacggcatg
421 gccaggcct tttgccagcc cttgacgtac ctgcataata g
```

```

//
LOCUS      DMACINML_56                454 bp    DNA        linear        16-DEC-2020
DEFINITION Campylobacter species strain strain.
ACCESSION
VERSION
KEYWORDS   .
SOURCE     Campylobacter species
  ORGANISM Campylobacter species
            Unclassified.
COMMENT    Annotated using prokka 1.13 from
            https://github.com/tseemann/prokka.
FEATURES   Location/Qualifiers
  source   1..454
            /organism="Campylobacter species"
            /mol_type="genomic DNA"
            /strain="strain"

ORIGIN
    1 gacaagttat cattaaagtt gatgaggtcc ttgaacagga aaaacctgaa gccatgttag
    61 ttcttggtga tactaactcc tgtatttcag caataccagc gaagcgtcgg agaattccga
    121 tcttccatat ggaggctggg aatcgttggt ttgatcaacg cgtaccggaa gaaactaaca
    181 gaaaaatagt tgaccacacc gctgatatca atatgacata tagtgatatc gcgctgtaat
    241 atcttctggc tgaaggtgta ccagccgata gaattattaa aaccggtagc ccaatgtttg
    301 aagtactcac tcattatatg ccgcagattg atggttctga tgtactttct cgcctgaatt
    361 taagaccggg gaatttcttt gtggtaagtg ctcacagaga agaaaatgtc gatacccta
    421 aacagcttgc gaaactggcg aatatactta atac

//
LOCUS      DMACINML_57                449 bp    DNA        linear        16-DEC-2020
DEFINITION Campylobacter species strain strain.
ACCESSION
VERSION
KEYWORDS   .
SOURCE     Campylobacter species
  ORGANISM Campylobacter species
            Unclassified.
COMMENT    Annotated using prokka 1.13 from
            https://github.com/tseemann/prokka.
FEATURES   Location/Qualifiers
  source   1..449
            /organism="Campylobacter species"
            /mol_type="genomic DNA"
            /strain="strain"
  gene     complement(209..442)
            /gene="apbC"
            /locus_tag="DMACINML_01854"
  CDS     complement(209..442)
            /gene="apbC"
            /locus_tag="DMACINML_01854"
            /inference="ab initio prediction:Prodigal:2.6"
            /inference="similar to AA sequence:UniProtKB:Q8ZNN5"
            /codon_start=1
            /transl_table=11
            /product="Iron-sulfur cluster carrier protein"
            /protein_id="Prokka:DMACINML_01854"
            /translation="MQRHLTQKLAEKYHTQLLGQMPLHISLREDLDRGTPTVVSRPES

```

## EFTAIYRELADRVAALYQGEVIPGEIAFRV"

## ORIGIN

1 tcgatacctt aaaaccaatt gaaaaaataa atcagtagga taggtatgat caattcaaat  
 61 aatgtttttg ccgattatntt cagataaaca cctgtctgtt taagcaggaa ttaacaatgc  
 121 gggggctatt attttattaa tacattcact gcatcaatat atattaatgc agtgaatgct  
 181 atattctctt tggaatacgt caggaggatt acaccgctcg gaaggcgatt tcaccggaa  
 241 tcacttcacc ctgccagtaa agctgtgccg caacgcgatc ggccagttcg cgatagatcg  
 301 cggtaaattc gctctccgga cggctaacca ccgtcggcgt accacgatcg agatcttcgc  
 361 gcagactaat atgcagcggc atctgacca gaagctgagt atggtatntt tccgccagct  
 421 tctgggtcag atgccgctgc atattagtc

//

LOCUS DMACINML\_58 443 bp DNA linear 16-DEC-2020

DEFINITION Campylobacter species strain strain.

ACCESSION

VERSION

KEYWORDS .

SOURCE Campylobacter species

ORGANISM Campylobacter species

Unclassified.

COMMENT Annotated using prokka 1.13 from  
<https://github.com/tseemann/prokka>.

FEATURES Location/Qualifiers

source 1..443

/organism="Campylobacter species"

/mol\_type="genomic DNA"

/strain="strain"

## ORIGIN

1 agatagaaaa aaatgtattg ctatggataa atactctcgt ggtgatgata taaatctagt  
 61 taaaaaagat ttagaagcac ttatgctatt aagacaaaa aatcgtttag aattaggtgg  
 121 atttgatact agcgattata gaggaaatgc tattgaactt tgtgtagag tattattaga  
 181 tatggatagt gcttgtgtat tagaattaat agaagaagat gagagaaaga aaaaagatat  
 241 ttttaataga gattggtttt tacatntttat gggttctaag ggtaagaatt taaatntttaga  
 301 acgcaaagt aattgtaaag aacacgagct tattaagaa tttgtagcta ctaaggatat  
 361 tgagntnttta catcaatata tgaaaaaaca tacaagatta agagatcctc tagatacttg  
 421 ggatcttgaa ggtgcagcaa ttg

//

LOCUS DMACINML\_59 442 bp DNA linear 16-DEC-2020

DEFINITION Campylobacter species strain strain.

ACCESSION

VERSION

KEYWORDS .

SOURCE Campylobacter species

ORGANISM Campylobacter species

Unclassified.

COMMENT Annotated using prokka 1.13 from  
<https://github.com/tseemann/prokka>.

FEATURES Location/Qualifiers

source 1..442

/organism="Campylobacter species"

/mol\_type="genomic DNA"

/strain="strain"

## ORIGIN

1 gcacaagcct tacagcctat acacatactg tcttctacta tcactatgcc ccattnttacc  
 61 ttcattggtt caccgnttg acacgntttc aagcaagat ggnttagaaca gtgattgcat

```
121 gatatagaag thtagtaagc aaaagcattt tgctcatagc ttccatcggt tttgcaagtc
181 cagtttcttc cttcggtttc aaatacacgg cggaaattaa cccctacagg catatcttta
241 taatccttgc aagataatga gcaggttcta caacctacac acttgctttg atctaacata
301 aagccaaatt gtgaattttc ttctaatttc atattatctc cttaagcttt tgcgatttca
361 accaagatag aatgttgacc attccctttg gatatagcag ttggttctaa acttgcaagt
421 gaatttacac aagttcctac at
```

//

LOCUS DMACINML\_60 440 bp DNA linear 16-DEC-2020

DEFINITION Campylobacter species strain strain.

ACCESSION

VERSION

KEYWORDS .

SOURCE Campylobacter species

ORGANISM Campylobacter species

Unclassified.

COMMENT Annotated using prokka 1.13 from  
<https://github.com/tseemann/prokka>.

FEATURES Location/Qualifiers

source 1..440

/organism="Campylobacter species"

/mol\_type="genomic DNA"

/strain="strain"

ORIGIN

```
1 tccctggatt gtcctgcctc tccgacgcga gaatacgcat agcctatgaa gccaatTTTT
61 agccgtggcc cgtcgctaca gattcgctt attctggcgg tgctggtggc gtcgpgcgtt
121 atcattgccg acagccgcct ggggacgttc agtcaaattc gaacgtacat ggacactgcc
181 gtcagtcctt tctattttat ttcaaacggc cctcgtgaac tgctcgacag cgtgtcgcaa
241 acgctggcct ctcgcgacca gcttgagctg gaaaatcggg cgctgcgcca ggaattactg
301 ctaaaaaaca gcgacctgct gatgctgggg cagtacaacc aggggaacgc gcggttgccg
361 gagctgctgg ggtcgccgct gcgtcaggac gagcagaaaa ttggtgactca ggttatttca
421 acggttaacg atccttacag
```

//

LOCUS DMACINML\_61 439 bp DNA linear 16-DEC-2020

DEFINITION Campylobacter species strain strain.

ACCESSION

VERSION

KEYWORDS .

SOURCE Campylobacter species

ORGANISM Campylobacter species

Unclassified.

COMMENT Annotated using prokka 1.13 from  
<https://github.com/tseemann/prokka>.

FEATURES Location/Qualifiers

source 1..439

/organism="Campylobacter species"

/mol\_type="genomic DNA"

/strain="strain"

ORIGIN

```
1 gcttaatccc ggctgcaggg ttttgggtga acgtccaaag cgctccaccg tccactggta
61 cccctgcgga acgattttga cgcccgcgcc gacgatcacc agcgcgacga aaatgagaat
121 agggataaga atgagcatag ctaaactcctc tgttgcgttg tccataaacc gattttgctg
181 acgaattaag cgaattatac ctgattcagt aaagcatggt ccccccttat taattacagg
241 gatacactat cgctataaaa atatgaacaa cggatgcgca ataaatgaca gaacgtagca
301 tgttgcttga gttaaagcag gtcggttacc ggactgcgac gacaaaaata gtgaataaca
```

361 tcagttttac gctgcaacgc ggcgaattta agttaattac cggtccttct ggctgcgaa  
421 aaagtacgtt gttgaaaat

//

LOCUS DMACINML\_62 437 bp DNA linear 16-DEC-2020

DEFINITION Campylobacter species strain strain.

ACCESSION

VERSION

KEYWORDS .

SOURCE Campylobacter species

ORGANISM Campylobacter species

Unclassified.

COMMENT Annotated using prokka 1.13 from  
<https://github.com/tseemann/prokka>.

FEATURES Location/Qualifiers

source 1..437  
/organism="Campylobacter species"  
/mol\_type="genomic DNA"  
/strain="strain"

ORIGIN

1 attttcttta gtatthttta gtgcatgtgc ttttaagaa aaaaagcaa gtgaaataga  
61 aactcttgca agtaattatg gtggaattta tatctttgat aaaaaataa gagaagagat  
121 attggaatta gagaaaaaaa gagaagaatt tcgtagtaag tatttgggta gtgaaattaa  
181 agtaggaaat gaaactcatt ttgtgaattt ttcttatttg aagaaaaaat tcccccaaat  
241 cttttctaag gtttgtaact attatcgtag tgattataga tataaaggca aggctaattt  
301 tggtttcaa gataaacccg aatttgcata ctatgaagat caatttaaag catatatggg  
361 tgaagaaaac tataaaaaat taagacctta ttaggtatg acaacttatt atgtgtgtga  
421 gggtagaaaa tctcctg

//

LOCUS DMACINML\_63 418 bp DNA linear 16-DEC-2020

DEFINITION Campylobacter species strain strain.

ACCESSION

VERSION

KEYWORDS .

SOURCE Campylobacter species

ORGANISM Campylobacter species

Unclassified.

COMMENT Annotated using prokka 1.13 from  
<https://github.com/tseemann/prokka>.

FEATURES Location/Qualifiers

source 1..418  
/organism="Campylobacter species"  
/mol\_type="genomic DNA"  
/strain="strain"

ORIGIN

1 ttaaaatctt caggcaatcc tgcagctttg ttaaaatcac ttccatata accatcttta  
61 tctacactat aaccataggc tgtattagta gaagtattac ttatatctac ttgtttatat  
121 tttagagtat aaatagagtt tttaaattca cttgatata cataattagg agaacttgct  
181 ttactactta tactaaaatt agtattattg ctagtatttg ttgtattagt agaatttaat  
241 acttcacttc ttgctagagt ttgtgaattt gcattttgaa tttcatttaa ttactagca  
301 ttttgtttta aaaaagcatt agcaaaactt attttagaat tttctttact ttctttatta  
361 gcttttgctt gtgaaagtat agaaccatag tttgagttat cattgatgct aaagatac

//

LOCUS DMACINML\_64 418 bp DNA linear 16-DEC-2020

DEFINITION Campylobacter species strain strain.

```

ACCESSION
VERSION
KEYWORDS .
SOURCE Campylobacter species
  ORGANISM Campylobacter species
           Unclassified.
COMMENT Annotated using prokka 1.13 from
         https://github.com/tseemann/prokka.
FEATURES             Location/Qualifiers
   source             1..418
                     /organism="Campylobacter species"
                     /mol_type="genomic DNA"
                     /strain="strain"

ORIGIN
    1 gtccggatta tcgtcgttac tgccaatcac gtaccacggt ttgacctcta ccagccagtt
    61 accgttttcg gccatcagac gggatatacag acggttccag ctacgcgagg tgggggtccga
    121 acgtccgtta gagtcattgt ttagtagccat ctctacgtcg cgcagcgtcc agccggcaaa
    181 gcgataatcg gtagcaaac caagaaaaag ctgctggttc tagttggttt cgcgaaacgg
    241 cgaagactct ttactgttgg aaagctgcca ccaggatttc tgcgtatagg aagcgccag
    301 taccgagttc ggccccagta ttccgcgcca cagcggaaac gccaggctca actgaaattt
    361 cacttcatct ttacgtgcgt tttcagacca gttgtaggta cttatggcct ctttgttc

//
LOCUS          DMACINML_65              417 bp    DNA        linear        16-DEC-2020
DEFINITION    Campylobacter species strain strain.
ACCESSION
VERSION
KEYWORDS .
SOURCE Campylobacter species
  ORGANISM Campylobacter species
           Unclassified.
COMMENT Annotated using prokka 1.13 from
         https://github.com/tseemann/prokka.
FEATURES             Location/Qualifiers
   source             1..417
                     /organism="Campylobacter species"
                     /mol_type="genomic DNA"
                     /strain="strain"
   gene              22..276
                     /locus_tag="DMACINML_01855"
   CDS              22..276
                     /locus_tag="DMACINML_01855"
                     /inference="ab initio prediction:Prodigal:2.6"
                     /inference="similar to AA sequence:RefSeq:CAL35035.1"
                     /codon_start=1
                     /transl_table=11
                     /product="putative hydrolase"
                     /protein_id="Prokka:DMACINML_01855"
                     /translation="MDKVVFKEPVFIGDIISCYSKVISVGNISIGVEVEVTAQRVDSQ
GCTSCINVTSALVTYVSVTRDGKKKPISEELKRIHGFLNT"

ORIGIN
    1 gaacgcgttg taactatc tatggataaa gtagtcttta aagaacctgt ttttatagga
    61 gatattattt cttgctattc taaagttata agcgtgggaa atacttctat aggtgtagag
    121 gtagaagtta ctgctcaaag agtggattct caaggctgta cctcttgcac caatgtaact
    181 tctgctttag ttacttatgt cagtgttaca agggatggaa agaaaaaac tatcagtgaa

```

```
241 gaattaaaga gaattcacgg atttttaaat acctaaaagc ttatTTTTgt atggtaaaaa
301 ctttaccctc ttaagctcat cagcatttat ttaaaccgcc gctgttTgtat tttttatcta
361 aacactcctt gaaaaattct cctcttGttt ttggggTttt ttcaggatgt ttttTgt
```

//

LOCUS DMACINML\_66 408 bp DNA linear 16-DEC-2020

DEFINITION Campylobacter species strain strain.

ACCESSION

VERSION

KEYWORDS .

SOURCE Campylobacter species

ORGANISM Campylobacter species

Unclassified.

COMMENT Annotated using prokka 1.13 from  
<https://github.com/tseemann/prokka>.

FEATURES Location/Qualifiers  
source 1..408  
/organism="Campylobacter species"  
/mol\_type="genomic DNA"  
/strain="strain"

ORIGIN

```
1 ggTTTTaaag gcgcgcgcga tgtgcgattt gcgatgtggg tatcgatgct ggggatgtgg
61 ggctgtcgcg ttgtggcagg gtatacgctt ggtattTgtc tgggtatggg ggTtTtaggg
121 gtttggctgg ggatgtttct tgactgggcc gtgcgcggcg cgctgTTTTa ctggcgtctg
181 gtaagcgggc gctggctgtg gagatacccg cgcgtaaaga gggagtaaagc gctTTTTgtc
241 gtgaatatca tcaggaaacg gtgaatttta accgaagtgt ggaataaaagc agcaaacgaa
301 cttttttTgt gaaaacaggc tttgacaagc caggggcacc tcgttaatat tcgccccgtt
361 cacacgattc ctctgtagtt cagtcggtag aacggcggac tgTtaatc
```

//

LOCUS DMACINML\_67 407 bp DNA linear 16-DEC-2020

DEFINITION Campylobacter species strain strain.

ACCESSION

VERSION

KEYWORDS .

SOURCE Campylobacter species

ORGANISM Campylobacter species

Unclassified.

COMMENT Annotated using prokka 1.13 from  
<https://github.com/tseemann/prokka>.

FEATURES Location/Qualifiers  
source 1..407  
/organism="Campylobacter species"  
/mol\_type="genomic DNA"  
/strain="strain"

ORIGIN

```
1 tttcaatact cagtattttt tcaatatatt ttgaactttt aagctattca tagcattttt
61 caattgcagc atggctctga atttctgagc ctaacaacca aatttatact atgtttggca
121 acaaagtggg atattttgac ctcaaaaggT tgatctctga gatgattctt cccttcccta
181 cacacagaca gtttatcttt tctttgctaa tggTTTTtga actgccagtg atgtatacag
241 atagcatata gtaagcaaac tgatagcaaa cagacacaag aacaggacta agttcaatta
301 tagaaataat tctccataat tgttcaagtt ttatatTTtga atagcaacca caaatatagg
361 acaacaagag tatcaaatat aattacagaa aattatcata tcatggc
```

//

LOCUS DMACINML\_68 395 bp DNA linear 16-DEC-2020

DEFINITION Campylobacter species strain strain.

```

ACCESSION
VERSION
KEYWORDS .
SOURCE Campylobacter species
  ORGANISM Campylobacter species
            Unclassified.
COMMENT Annotated using prokka 1.13 from
         https://github.com/tseemann/prokka.
FEATURES Location/Qualifiers
  source 1..395
         /organism="Campylobacter species"
         /mol_type="genomic DNA"
         /strain="strain"

ORIGIN
  1 gacaaaacct ttatccta ccaacaaga tcttttgtaa catcctcgcc ttggatta
  61 attttaatc cactttcact atttttatca tcttcattcg catgctttaa aaaataatga
  121 tccgtattca tacgatcaag aaaaaatact tttccatcat aaattcccct gcccttaagc
  181 tcaacttttg cttttctaaa atcaaaatcc agattatcaa aaatagcctg ctttttatca
  241 aaaatggcaa atttaagtcc ggtgctttga gcgatattac tagcgctttc attcatgggg
  301 ataaagcgag aattgaggat atttataatg atatttctat ggctctcctt taaaggagaa
  361 ctttttgtaa cgactaattc ctcatataat ttttg

//
LOCUS      DMACINML_69                395 bp    DNA        linear      16-DEC-2020
DEFINITION Campylobacter species strain strain.
ACCESSION
VERSION
KEYWORDS .
SOURCE Campylobacter species
  ORGANISM Campylobacter species
            Unclassified.
COMMENT Annotated using prokka 1.13 from
         https://github.com/tseemann/prokka.
FEATURES Location/Qualifiers
  source 1..395
         /organism="Campylobacter species"
         /mol_type="genomic DNA"
         /strain="strain"

ORIGIN
  1 gcggagtgga tacaacaca gatcgctacc ttaccgagta taaaacaagt actagcaata
  61 caatcataag agtagaaagt gttgaaatag acaaatccaa agccggagtt gatggaaaag
  121 atggcatagg ttacggcact atagttcaag attttaaattg cgggaatgaa ataattaact
  181 caaccaataa aggaaatgat gcaacaaatg gtaccaaaagg taccgatgct catctttacg
  241 gtaatggtgg taatggtggt aatggtgaaa gctttatcat cagcggtatg gtaggcagtg
  301 aagatacaaa gatctacgat cttaacaaa atatcacat ttcagctaca ggtggaaaag
  361 gtgccaatgg tgctgatggt ggctatgctg atggc

//
LOCUS      DMACINML_70                393 bp    DNA        linear      16-DEC-2020
DEFINITION Campylobacter species strain strain.
ACCESSION
VERSION
KEYWORDS .
SOURCE Campylobacter species
  ORGANISM Campylobacter species
            Unclassified.

```



COMMENT Annotated using prokka 1.13 from  
<https://github.com/tseemann/prokka>.

FEATURES Location/Qualifiers  
source 1..393  
/organism="Campylobacter species"  
/mol\_type="genomic DNA"  
/strain="strain"

ORIGIN  
1 cttttgctct ttggataaat tcaagtatta attttgcttg ttctgctttg atagctgcac  
61 cctgagaagt caccgaaggg ctagttaaag caagagtttc aagctcttta agctgagcat  
121 taataagatc tttttgagtt ttagcaacac tttttctaaa aacttgcaaa gcattcatat  
181 ctgattgtcc atttgctacg atcagccttg aaacatcctc tagtgctggt ctttttcgaa  
241 ctactaaagt ttttaagccc ctatgttctc cattgactat tctgctgata ttttgcgaaa  
301 tgtattcggg actaagctgc acttcatcac ccgtttttaa taaaacttta gaaaattgca  
361 ttttattata ggcacttact tcaagtctat gat

//  
LOCUS DMACINML\_71 391 bp DNA linear 16-DEC-2020  
DEFINITION Campylobacter species strain strain.  
ACCESSION  
VERSION  
KEYWORDS .  
SOURCE Campylobacter species  
ORGANISM Campylobacter species  
Unclassified.  
COMMENT Annotated using prokka 1.13 from  
<https://github.com/tseemann/prokka>.

FEATURES Location/Qualifiers  
source 1..391  
/organism="Campylobacter species"  
/mol\_type="genomic DNA"  
/strain="strain"

ORIGIN  
1 ctatcaaac aagtatttat aagagaaata caatatttag gttctatddd aactatddd  
61 tttgttcaa aacgagcttg tatagcacia gcataagctg tgtttgtatt tttaggttt  
121 acaatatctt ctcctttact atttttcata acaatatctt gctttaattd atcaccaaaa  
181 gtataaatat tattcttttc atcttgctct atatdddccc aaacatatta caacatcgca  
241 taactagcat ctgctatatt agcatagtct ttgatttgag agataagttc tttaggattc  
301 atcagtaact ttgtcctgta tttttttcat cactttttat aaattdacca ttagtaaaat  
361 aatgaaaaga tccccctcct gcacttttac g

//  
LOCUS DMACINML\_72 374 bp DNA linear 16-DEC-2020  
DEFINITION Campylobacter species strain strain.  
ACCESSION  
VERSION  
KEYWORDS .  
SOURCE Campylobacter species  
ORGANISM Campylobacter species  
Unclassified.  
COMMENT Annotated using prokka 1.13 from  
<https://github.com/tseemann/prokka>.

FEATURES Location/Qualifiers  
source 1..374  
/organism="Campylobacter species"  
/mol\_type="genomic DNA"

/strain="strain"

ORIGIN

```
1 atattatgta acaatttata ttgatccatt ggtagaatgt tttttggatt ttaaaaatca
61 gtgttattgg caaagagaag atttcacca tgccttttta ggacttgcca aaggcaaaag
121 tcctgataag ttagataaat atagatgaag aatcaaaaca aaaatttctt aaaaacaaag
181 aatgggacaa gatagatcaa aaatgggatg aagctaaagg gcctaatagaa ttcaatgatg
241 gtttttaggg ttttgggaact ggagtttttt taactccttc taaaatgcaa aagattgatt
301 ttgaaattgc aaaaggttta gatgagtggc ttgataatga aaatgtgtgt tgctttaatg
361 tttatactaa agat
```

//

LOCUS DMACINML\_73 364 bp DNA linear 16-DEC-2020

DEFINITION Campylobacter species strain strain.

ACCESSION

VERSION

KEYWORDS .

SOURCE Campylobacter species

ORGANISM Campylobacter species

Unclassified.

COMMENT Annotated using prokka 1.13 from  
<https://github.com/tseemann/prokka>.

FEATURES Location/Qualifiers

source 1..364

/organism="Campylobacter species"

/mol\_type="genomic DNA"

/strain="strain"

gene complement(239..315)

/locus\_tag="DMACINML\_01856"

tRNA complement(239..315)

/locus\_tag="DMACINML\_01856"

/product="tRNA-Ile"

/inference="COORDINATES: profile:Aragorn:1.2"

/note="tRNA-Ile(gat)"

ORIGIN

```
1 gatataagta aaaccaaaga aaagataatt gggttttatc ctttaacaag tcctgtaaaa
61 ttgtttttat taaaacttgc ttgtgactct taacaatgat aattataaag aacatttagg
121 tttaaaacct aaaggaagta tatgatatat caaagtatat ttataaaata tatacttgct
181 ttagatttta aaacttgatt tcaaactctg tttttatctt ttaagattga tatttctatg
241 gtgggcctaa caagacttga acttgtgacc tcacccttat caggggtgca ctctaaccag
301 ctgagctata ggcccttaat aatggtggag aatagcggga tcgaaccgct gacctcctgc
361 gtgc
```

//

LOCUS DMACINML\_74 362 bp DNA linear 16-DEC-2020

DEFINITION Campylobacter species strain strain.

ACCESSION

VERSION

KEYWORDS .

SOURCE Campylobacter species

ORGANISM Campylobacter species

Unclassified.

COMMENT Annotated using prokka 1.13 from  
<https://github.com/tseemann/prokka>.

FEATURES Location/Qualifiers

source 1..362

/organism="Campylobacter species"

/mol\_type="genomic DNA"  
/strain="strain"

ORIGIN

1 taatagtatt ttgatttgca cctatttcta tatctttggt ttctcctaca aactcatgag  
61 agtttttagc tattcttact ttattatcta ctcctacatt taaagtattg cttaatccta  
121 ctatagtgtc ttagataaa cctacattag ttaagtattc tcctcccaca ttgacatttt  
181 tagctaagtc tatggtttga gtatgaacct ttttaatcct ttcattataa attccatcta  
241 ccctagaatc tttatcattt aaaattcttt gagtgaaatt atgctggact aattcatcat  
301 aatccttttg ggcttttaaa taaatttggt ctttatcttt tatatttgag agggttaagtt  
361 ca

//

LOCUS DMACINML\_75 357 bp DNA linear 16-DEC-2020

DEFINITION Campylobacter species strain strain.

ACCESSION

VERSION

KEYWORDS .

SOURCE Campylobacter species

ORGANISM Campylobacter species

Unclassified.

COMMENT Annotated using prokka 1.13 from  
<https://github.com/tseemann/prokka>.

FEATURES Location/Qualifiers

source 1..357

/organism="Campylobacter species"

/mol\_type="genomic DNA"

/strain="strain"

ORIGIN

1 atgataaaag caaaagtttt gaaatgatgg agtattttga aagcctagga cttaaagccg  
61 atgaagtaca ctttggatac aatgcactca gtagatatac cgatagagat ggaaaaaata  
121 aagaagtaat agagtatttt tttaaaaaag gatgcacatt tgaaacttat aatgaagaaa  
181 gtggtagcac tcctttgcat gaatggatac tatgtggcga agaagtgaag tattttagaag  
241 aagctttaa actaggagca aatcctaata tgagaagtat taaaacagaa aatgaattta  
301 gcttttagtgg tgcaggagaa acccttttgc atagagctgc aggaagtaaa gaaaagc

//

LOCUS DMACINML\_76 348 bp DNA linear 16-DEC-2020

DEFINITION Campylobacter species strain strain.

ACCESSION

VERSION

KEYWORDS .

SOURCE Campylobacter species

ORGANISM Campylobacter species

Unclassified.

COMMENT Annotated using prokka 1.13 from  
<https://github.com/tseemann/prokka>.

FEATURES Location/Qualifiers

source 1..348

/organism="Campylobacter species"

/mol\_type="genomic DNA"

/strain="strain"

ORIGIN

1 tttagagctt ctttttgaa aaagagaac ttgtcttttt tgtataacag atagaaaaaa  
61 atgtattgct atggataaat actctcgtgg tgatgatata aatctagtta aaaaagattt  
121 agaagcatac gtattattaa aacaagaaca tcgttttagaa gtaggaattg atattggtta  
181 ttatagagga aatgctcttg aactttgcat tagagtatta ttatagatgg atactgcttg

241 tgtattagaa ttaatagaag aagatgagag aaaaagaaga gatattctca atagagattg  
301 gtttttacat tttataggat ctaagggtaa aaacttaaat ttagaacg

//

LOCUS DMACINML\_77 333 bp DNA linear 16-DEC-2020

DEFINITION Campylobacter species strain strain.

ACCESSION

VERSION

KEYWORDS .

SOURCE Campylobacter species

ORGANISM Campylobacter species

Unclassified.

COMMENT Annotated using prokka 1.13 from  
<https://github.com/tseemann/prokka>.

FEATURES Location/Qualifiers  
source 1..333  
/organism="Campylobacter species"  
/mol\_type="genomic DNA"  
/strain="strain"

ORIGIN

1 agtagattgg gtgattgatt taaataaata tgattttgcc tatgatgaag aaggtagaat  
61 catttgggct ttatataatg atattgaaaa aggtaaatta aaagatccaa gagatgtgga  
121 ttctactcct gaaagtagaa atgaatttga tgatgctatg gatggatagc aaaatggaat  
181 ggtaactaga tttgatgtag atattagaaa cgaaagagat gagagatctg ctaaactgac  
241 tatggatacc ctagtattaa gtgccaaact cgcagccctc actcctcctc aaggctatcc  
301 taatgctcct tattatttta cacctgaaag att

//

LOCUS DMACINML\_78 300 bp DNA linear 16-DEC-2020

DEFINITION Campylobacter species strain strain.

ACCESSION

VERSION

KEYWORDS .

SOURCE Campylobacter species

ORGANISM Campylobacter species

Unclassified.

COMMENT Annotated using prokka 1.13 from  
<https://github.com/tseemann/prokka>.

FEATURES Location/Qualifiers  
source 1..300  
/organism="Campylobacter species"  
/mol\_type="genomic DNA"  
/strain="strain"

ORIGIN

1 taatTTTTag cttAattgtg ttgtctttgt gtttggttta taatttcatt gtatggTTTT  
61 ttgggtgggt ttaagatatt gatttgctag gctggtaaatt ttgtttgggt ttttttattg  
121 tttgaataca cttgctttat ttgggtgggtt tattggttgt gagcttggtt ggTTaagttg  
181 gactgatggT ttaatcattt ttaatctgtt tttagtttaa ttgttaaatt tggTgtttgc  
241 ttgtatattt ttatctatta aatttatttt ttgtatgcta attaaatatg tttttgtatt

//

LOCUS DMACINML\_79 296 bp DNA linear 16-DEC-2020

DEFINITION Campylobacter species strain strain.

ACCESSION

VERSION

KEYWORDS .

SOURCE Campylobacter species

```

ORGANISM Campylobacter species
          Unclassified.
COMMENT   Annotated using prokka 1.13 from
          https://github.com/tseemann/prokka.
FEATURES   Location/Qualifiers
            source          1..296
                              /organism="Campylobacter species"
                              /mol_type="genomic DNA"
                              /strain="strain"
ORIGIN
            1 gcttttcttt acttcctgca gctctatgca aaagggtttc tcctgcacca ctaaagctaa
            61 attcattttc tgttttaatt cttctcatat taggatttgc tcctagtttt aaagcttctt
            121 ctaaataatt tgcatgattt agcaatatcc aaacatgcaa aggagtgctg ccacttttctt
            181 cattataagt ttcaaagtgt catccttttt taaaaaata ctctattact tctttatttt
            241 ttccatctct atcgatatat ctactgagtg cattgtatcc aaagtgtact tcatcg
//
LOCUS     DMACINML_80                294 bp    DNA        linear        16-DEC-2020
DEFINITION Campylobacter species strain strain.
ACCESSION
VERSION
KEYWORDS  .
SOURCE    Campylobacter species
  ORGANISM Campylobacter species
            Unclassified.
COMMENT   Annotated using prokka 1.13 from
          https://github.com/tseemann/prokka.
FEATURES   Location/Qualifiers
            source          1..294
                              /organism="Campylobacter species"
                              /mol_type="genomic DNA"
                              /strain="strain"
            gene            complement(116..268)
                              /locus_tag="DMACINML_01857"
            CDS             complement(116..268)
                              /locus_tag="DMACINML_01857"
                              /inference="ab initio prediction:Prodigal:2.6"
                              /inference="similar to AA sequence:RefSeq:CKG86653.1"
                              /codon_start=1
                              /transl_table=11
                              /product="hypothetical protein"
                              /protein_id="Prokka:DMACINML_01857"
                              /translation="MYNINCFRTQKGTKYLNEILAPKFYNYKDKLEVEIDDKGNILRW
IGKINR"
ORIGIN
            1 agtattttat tggtatcttt ttccacatct aatgttaacc cattgggtgt ataatctca
            61 taagtttcgc tcattattta tcctttgtaa aatccaatgt aaaatccaaa taaactcatc
            121 tattaatttt tcctatccat ctaagtatat tacccttacc atcaatttct actttctaat
            181 ctttgatttt gttataaaat ttaggagcta agatttcatt gagatatttt gtgccttttt
            241 gagtgcgaaa gcaattgata ttatacatat cccaattatc caaattcccc caaa
//
LOCUS     DMACINML_81                280 bp    DNA        linear        16-DEC-2020
DEFINITION Campylobacter species strain strain.
ACCESSION
VERSION

```

KEYWORDS .  
 SOURCE Campylobacter species  
 ORGANISM Campylobacter species  
 Unclassified.  
 COMMENT Annotated using prokka 1.13 from  
<https://github.com/tseemann/prokka>.  
 FEATURES Location/Qualifiers  
 source 1..280  
 /organism="Campylobacter species"  
 /mol\_type="genomic DNA"  
 /strain="strain"

ORIGIN  
 1 attcaaacia taaaaaac caacaaatt taccagccta gcaaatcaat atcttaacac  
 61 caccaaaaa accatacaat gaaattataa accaaacaca aagacaacac aattaagcta  
 121 aaaattagat tcaataaata aaaaaggata attaatacaa aaacatattt aattagcata  
 181 caaaaaataa atttaataga taaaaatata caagcaaaca ccaaatttaa caattaaact  
 241 aaaaacagat taaaaatgat taaaccatca gtccaactta

//

LOCUS DMACINML\_82 273 bp DNA linear 16-DEC-2020  
 DEFINITION Campylobacter species strain strain.  
 ACCESSION  
 VERSION  
 KEYWORDS .  
 SOURCE Campylobacter species  
 ORGANISM Campylobacter species  
 Unclassified.  
 COMMENT Annotated using prokka 1.13 from  
<https://github.com/tseemann/prokka>.  
 FEATURES Location/Qualifiers  
 source 1..273  
 /organism="Campylobacter species"  
 /mol\_type="genomic DNA"  
 /strain="strain"

ORIGIN  
 1 atcataatat tcaatthttcc catcttcaat atcacatatg cgacaattag ccgcatttac  
 61 atcagctcca tatttgatta gcacttccac gcaagctcct ataggtttct catcagattc  
 121 tgcagctcta tgcaaaaggg tttctcctgc accactaaag ctaaattcat tttctgtttt  
 181 aatacttctc atattagat ttgctcctag ttttaaagct tcttctaat acttcacttc  
 241 ttcgccacat agtatccatt catgcaaagg agt

//

LOCUS DMACINML\_83 273 bp DNA linear 16-DEC-2020  
 DEFINITION Campylobacter species strain strain.  
 ACCESSION  
 VERSION  
 KEYWORDS .  
 SOURCE Campylobacter species  
 ORGANISM Campylobacter species  
 Unclassified.  
 COMMENT Annotated using prokka 1.13 from  
<https://github.com/tseemann/prokka>.  
 FEATURES Location/Qualifiers  
 source 1..273  
 /organism="Campylobacter species"  
 /mol\_type="genomic DNA"

```

                                /strain="strain"
ORIGIN
    1 ctagatattt atatctttct cttttggttt ttaaagattt ataataagct ttttctgctt
    61 tagtccaagg agctatgctt cctttaatgg gatcttttaa atatatgctt tgccaatctt
    121 taaattcaag caaagtggat ttttgcctg tataaaagtt aggatctaga tatattggtt
    181 tatagtcttt gtagggggag tttttcataa tataataaga ttcaaaaacc gctttggaat
    241 attcttgagt ataattgcct gtgggtttaa tat
//
LOCUS          DMACINML_84                271 bp    DNA        linear        16-DEC-2020
DEFINITION    Campylobacter species strain strain.
ACCESSION
VERSION
KEYWORDS      .
SOURCE        Campylobacter species
  ORGANISM    Campylobacter species
              Unclassified.
COMMENT       Annotated using prokka 1.13 from
              https://github.com/tseemann/prokka.
FEATURES      Location/Qualifiers
  source      1..271
              /organism="Campylobacter species"
              /mol_type="genomic DNA"
              /strain="strain"
ORIGIN
    1 tattttaaagt cttaaatca ttaagaagtt ttaaataaag tcctaaattc atttttaa
    61 ctaaatccat gtattgattt tcaatatttt gaatcttttt ttcattggata taaaaatgat
    121 tacccttttt tataatccca ttccaatctt tcagggtgtaa aataataagg agcattagga
    181 tagccttgag gaggagtgag ggctgcgagt ttggcactta atactagggt atccatagtc
    241 agtttagcag atctctcatc tctttcgttt c
//
LOCUS          DMACINML_85                258 bp    DNA        linear        16-DEC-2020
DEFINITION    Campylobacter species strain strain.
ACCESSION
VERSION
KEYWORDS      .
SOURCE        Campylobacter species
  ORGANISM    Campylobacter species
              Unclassified.
COMMENT       Annotated using prokka 1.13 from
              https://github.com/tseemann/prokka.
FEATURES      Location/Qualifiers
  source      1..258
              /organism="Campylobacter species"
              /mol_type="genomic DNA"
              /strain="strain"
ORIGIN
    1 ccgatgaagt acactttgga tacaatgcac tcagtagata tatcgatega gatggaaaaa
    61 ataaagaagt aatagagtat ttttttaaaa aaggatgcac atttgaaact tataatgaag
    121 aaagtggtag cactcctttg catgaatgga tactatgtgg cgaagaagtg aagtatttag
    181 aagaagcttt aaaactagga gcaaatccta atatgagaag tattaaaaca gaaaatgaat
    241 ttagcttttag tggtgcag
//
LOCUS          DMACINML_86                256 bp    DNA        linear        16-DEC-2020
DEFINITION    Campylobacter species strain strain.

```

```

ACCESSION
VERSION
KEYWORDS .
SOURCE Campylobacter species
  ORGANISM Campylobacter species
            Unclassified.
COMMENT   Annotated using prokka 1.13 from
            https://github.com/tseemann/prokka.
FEATURES   Location/Qualifiers
  source   1..256
            /organism="Campylobacter species"
            /mol_type="genomic DNA"
            /strain="strain"

ORIGIN
    1 ttaaattcta ctagagtgga tttctctcct gtataaaagt taggatctag atatattggt
    61 ttatagtctt tgtaggggga gtttttcata atataataag attcaaaaac cgctttggaa
    121 tattcttcgg tataattgcc tgtgggttta atatcttctt taaatagtat tttattggta
    181 tctttttcca catctaattg taaccatttg ggtgtataaa tctcataagt ttcgctcatt
    241 atttatcctt tgtaaa

//
LOCUS      DMACINML_87                256 bp    DNA        linear        16-DEC-2020
DEFINITION Campylobacter species strain strain.
ACCESSION
VERSION
KEYWORDS .
SOURCE Campylobacter species
  ORGANISM Campylobacter species
            Unclassified.
COMMENT   Annotated using prokka 1.13 from
            https://github.com/tseemann/prokka.
FEATURES   Location/Qualifiers
  source   1..256
            /organism="Campylobacter species"
            /mol_type="genomic DNA"
            /strain="strain"

ORIGIN
    1 ttatgatgaa gcagatgagg atgaatttga ggattggttt attaaaaatg tgctttatca
    61 tgatgattta agtgagattt ataaaatact aaaatcactt gttaaagatt aaaaactaaa
    121 tttacaaaga aagaaagaaa ggaaaaacaa tgaaaacatt agaagaatta atagctttag
    181 aagaaaaata tctaaaagaa ttatgttttag aattttatga tctttagtag gctaacaac
    241 ttgaagaagt taaga

//
LOCUS      DMACINML_88                255 bp    DNA        linear        16-DEC-2020
DEFINITION Campylobacter species strain strain.
ACCESSION
VERSION
KEYWORDS .
SOURCE Campylobacter species
  ORGANISM Campylobacter species
            Unclassified.
COMMENT   Annotated using prokka 1.13 from
            https://github.com/tseemann/prokka.
FEATURES   Location/Qualifiers
  source   1..255

```



```
/organism="Campylobacter species"  
/mol_type="genomic DNA"  
/strain="strain"
```

ORIGIN

```
1 gaattaaaac agaaaatgaa tttagcttta gtggtgcagg agaaaccctt ttgcatagag  
61 ctgcaggaag taaagaaaag cctataggag cttgcgtgga agtgctaadc aaatatggag  
121 ctgatgtgaa tgcagttaat tgtggtatat gtgatattga agatgggaaa attgaatatt  
181 atgacctgc tactccattg gatgaagcta atacttacga tataaataaa aatataaaaa  
241 tcttaaaaaa agcag
```

//

```
LOCUS          DMACINML_89                255 bp    DNA        linear      16-DEC-2020
```

```
DEFINITION    Campylobacter species strain strain.
```

```
ACCESSION
```

```
VERSION
```

```
KEYWORDS      .
```

```
SOURCE        Campylobacter species
```

```
  ORGANISM    Campylobacter species
```

```
  Unclassified.
```

```
COMMENT       Annotated using prokka 1.13 from  
              https://github.com/tseemann/prokka.
```

```
FEATURES      Location/Qualifiers
```

```
  source      1..255
```

```
              /organism="Campylobacter species"
```

```
              /mol_type="genomic DNA"
```

```
              /strain="strain"
```

ORIGIN

```
1 gaattaaaac agaaaatgaa tttagcttta gtggtgcagg agaaaccctt ttgcatagag  
61 ctgcaggaag taaagaaaag cctataggag cttgcgtgga agtgctaadc aaatatggag  
121 ctgatgtaaa tgcagttaat tgtggtatat gtgatattga agatgggaaa attgaatatt  
181 atgacctgc tactccattg gatgaagcta atacttacga tataaataaa aatataaaaa  
241 tcttaaaaaa agcag
```

//

```
LOCUS          DMACINML_90                255 bp    DNA        linear      16-DEC-2020
```

```
DEFINITION    Campylobacter species strain strain.
```

```
ACCESSION
```

```
VERSION
```

```
KEYWORDS      .
```

```
SOURCE        Campylobacter species
```

```
  ORGANISM    Campylobacter species
```

```
  Unclassified.
```

```
COMMENT       Annotated using prokka 1.13 from  
              https://github.com/tseemann/prokka.
```

```
FEATURES      Location/Qualifiers
```

```
  source      1..255
```

```
              /organism="Campylobacter species"
```

```
              /mol_type="genomic DNA"
```

```
              /strain="strain"
```

```
  gene        complement(74..238)
```

```
              /locus_tag="DMACINML_01858"
```

```
  CDS         complement(74..238)
```

```
              /locus_tag="DMACINML_01858"
```

```
              /inference="ab initio prediction:Prodigal:2.6"
```

```
              /codon_start=1
```

```
              /transl_table=11
```

/product="hypothetical protein"  
/protein\_id="Prokka:DMACINML\_01858"  
/translation="MDEANTYDINKNIKILKKAGAKTWEELVEEYNIIDTSLEEPEQIK  
MYEERRKDKK"

ORIGIN

1 tttgtgtcta aaaatgcttt gaaattatct aagctttcta aaatatctgt gttaaaatcc  
61 ataatttttc cttttatttt ttatcttttc ttctttcttc atacatttta atttgttctg  
121 gttcttccaa gcttgatcgc atattgtatt cttcaaccaa ttcttcccaa gtcttagctc  
181 ctgctttttt taagattttt atatttttat ttatatcgta agtattagct tcatccaatg  
241 gagtagcagg atcat

//

LOCUS DMACINML\_91 255 bp DNA linear 16-DEC-2020

DEFINITION Campylobacter species strain strain.

ACCESSION

VERSION

KEYWORDS .

SOURCE Campylobacter species

ORGANISM Campylobacter species

Unclassified.

COMMENT Annotated using prokka 1.13 from  
<https://github.com/tseemann/prokka>.

FEATURES Location/Qualifiers

source 1..255

/organism="Campylobacter species"

/mol\_type="genomic DNA"

/strain="strain"

ORIGIN

1 ctctaatagc taaaatataa ttgatatagc catattcact ggtatagctt ttttctttag  
61 ttttactatc aatttgtttt cttttttctc caaataaagt agcagaaaaa cctgaatttg  
121 tattagggca atgttttaat aatcatagc gagaaaagaa ttgttttagct tggagtgggg  
181 agaagtcgcc atcaaataag gaattatatt ccatattgag aatgtcggtg taggtagctt  
241 tggcattttg cactt

//

LOCUS DMACINML\_92 255 bp DNA linear 16-DEC-2020

DEFINITION Campylobacter species strain strain.

ACCESSION

VERSION

KEYWORDS .

SOURCE Campylobacter species

ORGANISM Campylobacter species

Unclassified.

COMMENT Annotated using prokka 1.13 from  
<https://github.com/tseemann/prokka>.

FEATURES Location/Qualifiers

source 1..255

/organism="Campylobacter species"

/mol\_type="genomic DNA"

/strain="strain"

ORIGIN

1 tctttaactt cttcaagttt gttagcctct acaagatcat aaaattctaa acataattct  
61 ttttagatatt tttcttctaa agctattaat tcttctaag ttttcattgt ttttcctttc  
121 tttctttata aatttagttt ttaatcttta acaagtgatt ttagtatttt ataaatctca  
181 cttaaactat catgataaag cacattttta ataaaccaat cctcaaattc atcctcatct  
241 gcttcatcat aaggt

//
